# Supplementary material for: 3D texture-based face recognition system using fine-tuned deep residual networks
Source: PeerJ journal article supplement (doi:10.7717/peerj-cs.236), 2019-12-02
Supplement: Source_files-part1-Only_for_checking-To_PeerJ-examiner-Please_Download_this_ZipAll_the_source_files_in_my_Manuscript-3D_textures_based_face_recognition--Author-SIMING_ZHENG.zip [file Source_files-part1-Only_for_checking-To_PeerJ-examiner-Please_Download_this_ZipAll_the_source_files_in_my_Manuscript-3D_textures_based_face_recognition--Author-SIMING_ZHENG.zip]

$$G_x(x, y) = H(x+1, y) - H(x-1, y)$$
