# Supplementary material for: 3D texture-based face recognition system using fine-tuned deep residual networks
Source: PeerJ Comput Sci. 2019 Dec 2;5:e236. doi: 10.7717/peerj-cs.236 (PMC7924501; doi:10.7717/peerj-cs.236)
Supplement: Supplemental Information 5 [file peerj-cs-05-236-s005.zip › Source files-part1-Only for checking-To PeerJ-examiner-Please Download this Zip∩╝îAll the source files in my Manuscript-3D textures based face recognition--Author-SIMING ZHENG/2---68-key-point--Source Document/01-files/04222d358.ppm]

P6
#vivid 3D Data
#width 640
#height 480
# ViewInfo
# pitchX 0.007400
# pitchY 0.007400
# focus 14.380219
# viewPoint 0.000000 0.000000 21.681755
# interest 0.000000 0.000000 -1580.000000
# centerX 320.000000
# centerY 240.000000
# date  Fri Apr 25 15:07:44 2003
# upVector 0.000000 1.000000 0.000000
640 480
255
{z||~|~|~~| ¡  ¡¢¢ ¢  £ ¡  ¡£ ¡¤ ¡¢££ ¡¡¡¢¢££ ¢¦¢¥£¡¤¡£¡¥¢¡£¤£¢¢£¥¡££¡¡ ££§¤£¥ £¢§¥§¤¤¥¥¢¨£©¤§¥¦¥¦§¤¥¦¡¦£§¦¥§§¤§¤¥¦ª §¥¦¤¨¢¤¥£¢«¤¦¨¦¥ª§§¥¥§©©¨¥¥§§¥«¥¥¦¦§ª¦§¦§¥ª£©§¨§ª§§§«§«©©©¨§ª«©§¨§ª©«ª«©¬ª©¨ª§«§¤£¥to[fU|gWriUlkWn`Sk]IbWFdQK_SD_QK]QI_KBYWFUWK]UO_YUb`O`dSbgWfbUfbSddQ`_O]SD`UIYQK_ODdYIYSI[OD_MKYUI_WFYQDYUI]WI]WI_UMYQI`UD`YF]QD]Q?YSFWOBYI:[M?YB:S?8UF:QB?K?:SD=O??K?=SD=MF=O?:QD?ODBMDBOK=OM?QK?UD=Q??ID?OF:MI?OI:KD8O?:O?=M?BMI?KIBQD:QF:QB:O:5QD=MD8KD:QB=KD:Q=8MD=KD:KD=OF?UIBQ??QF8QF=MI=SDBWOBQI:QKDUKBUKK_KDWQK[WK[QK_WQd]Og_QgbSidQd_Od]Qd_QlWQ`]Qd]KgYIiYMbYOdYIdWIiSOdUMk_MgYUfYWg_Qg`YkdYqn[tgYrl[qf[uf`rukzokzrttuxz~ ¡¡¢¡¥§©§ª§©®­¬«©©¨ª¬­¬¬°°°®±±±®±²­´´°®¯®³¯­²³²±°³°®±´²²³´²°³³³²±³²´³²²¶°±´¶²³±³²³±³µ³·³³³³´³³²²°³µ±°µ²²­³³´²µµ²´²´´µ®µ²°µ²´²³´µ±±²²µ²²³³°±³¯³²µ²´±´±´²²³°±³³²±³²´²¯¯´³³³³°³±³µ°³µ²³´²²³±´³°°´³·³µ°³±²±³³°¬³´¯¡²³³¶´²²³³³±°³´³´ °²³³²³²µ³³´µ³²³³®²³³±®³´´µ°´²³³´²³²³±±°±°±²²³±±´²´ °±²°²µ¯®±®²°°²²°²°±µ±²´²¯®¯®®²±²³±°´³³°±°±±³°±²²±­«±°²²­±¯¬²°²®®°°¯±°°­°¯±±±²² ²±±±¯®¬²­°¬®­®¨®¯°±°°±­°®¬°¯¬³²®­³®°­®®±±®°®­±¬²®¬±®¬­°®¬­­ª¬¬®®­°®©­¬­®¬¬¯¬­®®®®®«©««©«¬­¨«­ª¬«­¬¬©¬­ª«©©¬¬©ª¬«¯¬¬®¬ª«®«§¬ª­¬«¬¬ª©¨­©¥©«¬¬«ª§©ª­«©©©§§ª©©©§©§§©¨§§¦ª§¥£¨¨¨¦¦¥ª©§ª¦¨¨¥¨§§§¨¦¦¦¥¦§     ¡   ¥¢¤¡¥ ¡  ¥¤ ¤¤¤¢¢¢¢¤¤££ ¢ ¦§¤¤¡¦¢¤¤¥¤¢¨£©¦¥¤¦¢¦¦¨£¨¡§¥¥¡¦ ¤ ¨¡©¡¥ ¤ª¥© ¨¦¡¤§ª¤¦ª¨§¨£¨§¡«£§£« ¥¦ª ª£¬¢¬¤¨¤¬£©¥ª© ª¡¨¥¬¡§¥¬¤¬¤©¤ª£¬§©¥©¤«¦¨¥¬¤¬¥©¨ª¥¯«¬«­¦¯¦¯¦«¥­ª¬§¬¦¬¥­ª¬¦°¨¬¤¬©¬§¬§­§ª¨®©®¨¬¦¬¬­¬®§®¨®¦¬¦­¨±ª««®§­¥°¨­¦±©¬¨®©­ª¬ª®ª¯«­¨±¬´ª­ªª¨³¬²¬°¨°ª®¬­ª¯£«¢ukdi[g_|ibtibuf]t_So[UfUOkUOdWOdMKgUK`QUd`Uf]Ug]Sfb_if_ofdnkYkbWl]Qr[SiUKiUOdWMbUSbUQgYUbSQd[Og[S_YUibSf`WldWk`SibOl_Wl[SfSQi][nYSkSOi]UiSSl_Of[ObUIbKB`OF]?B[B?[F?[?DYBBUBDWFBS?BWDDSFBU?FWDDUIKYFMY??_DFSBFY=?SIIUDDWBBW=?UDBU=DWKDUFFYBB[FDWD?YB?[BFSD=S?BS?KYDBY=BYBBUIB[KBWBI[BFYDF]D?[BDYFK[MKYMK[MD[KD]KDYKQgOIdWQf[SdiSidQkb]n`]ofYoi[obSr]SnbWn]WkYQk_UkUOk[SiYQiWQkWMdQMbKOgUMkWOiYOgUKfYSgWUkQSk[Uo[Yq]Wq]Wud[u`Wxgfuignwqo|wzttw{¥ ©¢§¤«¥ª¬¤ª­¤®ª±®³³±°³³³°´°¶­¶¯¶±·¶¶³´´¶³¶µ¡·²º³ ³´·´ ·³´´¸³¡¹¶ ·´¢º´·¸¤·µ¸±¹´¥¹µ¤¹µ£¹¶¢º¶¥¸¸»³¹·¥·µ·µ¡¶·¤¹··³¡¸¶¢¹¶º´¡»¶ ·³¡·¶¢º· »¶ ·µ¸»¤¹»¤¸³¤·´·º¥¹´¡¹µ¸¸¡·´»³¡·³ ··£¹·¢·· ·µ¡¶µº·¤¸·¤»³µ·£¶´¥º¶¸´¤¹¶·¹·µ·µ¶²¶´··¡·³ ·³¤·³¢·¶¡ºµ¢··¡µ· »´£»¶¤·¶ ·¶¢º´ ·¶£¶´¡¸´§¶¶ ·µ¡»³¤·´¢¶³ ¹·¡¸µ ··¢¹³¤·¶ µ´¤¹¶£¶¶¤¸·¡ºµ º·¢¹· µµ¡·´£¹³¢·³¹·¢¶µ¸µ ··¢·³·· ··µ·¡·µ·´£··¢º´¦·³ ·¶¤¸³ µµ¡¹¶ ·±³µ¶´¡¹²·´ ³¶£¶´ ·³¡µ¶¥µ³¶´¢¸³ ³³¹¯¡¶´¡²³ ´´ ´¶ ¶·¢¹³¸³´³ ¶³³³·µ³´µ´ µ°¡³°¶´ µ³¤µ´ ¸´¸² ¶³³±¥¸´¡³±£´²¶³³³ ³²µ° ´³¡´°µ²¡µ·¡¶¯¶³¶µ±³£µ´ ¶´´¯ ¶³³´¡·°µ²³° ´¯ ³±²³¡·²£µ³´± ³³³¯°³¯°³±´´±±¢³°²± µ²µ®¶¬³®¯®°¬±°­¯°³³®°­°®±³®¬°¬°¯³±¡¯¬³¯¯®®­´¯±­®«±¬²® ±®±­¯¬¬®°©®­®¬²¬±«®®³¨­¬­«­¬¯¨ª¦®¨­¬®«¬¨¬«®©¬©¯ª²¬¬ª­­¯¨­§­ª­¨­«­~~|zz~~~||~¡¡¡¡¡¢¢ ¢ ¡£ ¢ £¡¡¢¡£   ¡¢¢£¢£ ¢¡¡¦£¢¡£¡£¢££¢¡¦¡¦¡¡ ¦¢¦ ¦£¤¦¨¤§¤ £¥¢¤£¤¤©£¤¦¦¤¥¡¥¥¨£¦¢¥¥¥¡¨¦©£¥¤¢¤¥¤¤¤¨ ¦¨§§§§©¤§§¨¨ª¥¨¥©§«¨¥¨¬£«¨©¦ª¨¥§¦¥ª§§¨©¦¨©§¨§§¨§§©¨«¨¨¬ª¬©§¦©§¬§§§¬§«©¬««ªªª«¬¬¥¬«¬©©§­¨««««¨¦¬¬¬ª©«±®«¬¬¥¬ª«©«©­«¥¥¥{gkWiW|qQrkUogQngOldMgYO`UDd]K]UFbQ?_WI[]K]WO]]UdgM``Uf`Q]`WdbUfYQ_YI`QIfSD[QF]MI]SD]SD[UD`YI][K`]M[]MfbO`dSb_QbqYigOfgQflM_fOdbKd_Md[Ki_Id]I]`O`YKfUK`WKYO=]MBWS=UK=SO8UD:MB=Q?:QD8IB:K?5K?8I?:OB8QD?KD8OD8KD:KD8M?5MD5Q?8MB:U=:SB8I?5MD5MB8MD:OF?MD?QF8MD0SD8KD5IB=QI=O?:QB5IF=QM=OB:QB:MB5OD5QD5QK?SK8QI=UI?SI=]QIWYI]`K[_Qd`UdbUi`SidUkfQikQigSgbSl`OibSdbKgkOg`M`_Mf[IiWDbUD]SI`SD]UDbUD[WI`YI]SFdQB_WK]QF[]F_QM_QIdUKgUO]`Kk_Oi`Qk_Wk]UqkUqgUug]xql{wu¨§£ ¢ £££©¥©§¬¬°©­­¬­¯°³³±®±°³³³³°²®¯®³°¯¶·µ³·µµ´³´³³·³¹µ²³·µ¸´µ³µ¶···¶±´·µ¶µ·µ·µ·µ¶³·µ´·´´¶¶³³¶µ²²´¶· ·µ¶µµ´³·¡¶¸·´µ»²´ ³¹··³··¸³·²µµ¸³³´µµ´²¸³µ°³¶µ´·³¶³··¸´µµ³ ´³³²´³³¸³²³··¶¡µ·µµ·¶µ´³³±¶¶µ¡µµ³µ·ºµ·¡·³¸¶µ³·µ´µ³¹¡¹µ¡´¶·µ³µ·µ²·µ·³·¶···³¸³· ²¹µµ¶µ²·µ···³µ··µ¹·¶¸²µµ´µ±·³·³·²¶³·£´·´º ³µ¡±·³³³µ³µ³´µ³¡µ¸´·±²³·²°¶³°³³³³·³²³³²³²´³³³³³µ²³¯³¶°³¯¯³³µ³³±²´³°µ¯²²³°³ ³³µ³±µ¡³´²³³³²²¯²²²°³´³®´°´±²³²°²®°³®¯¶³²³·³³°²²³´µ²²³°²µ°²±®±°¯±°²±±°¬¬®®°«¯¯¯¯²­²¯°²°ª­¬®±­¬®­®°±®²¬®®¯®®¬¬¯°«°¬¬­®¬¬­«¬¬®­©¬«¬¬­¬ª®©¬®¬±­¯¯««¯©ª¬¬«ªª«ªª¬«¬«¬­ª­ªªªª¥««¬­¦«ª§«©ª¬©©ª¬¨ª®ª«¨©ª¨©¬§©«¬©­§ ¡¢ ¡¡¤¢¡ ¡¢¤£¡¢ ¡¡¤¢¡¡¤¢ ¡¡¥£¤§ ¤¤¢¥¨ ¥¥ §¦¤¦¤¦¢¤©¢¥¨¤¨¢¥§¢¦ ¥¦ ¦¥¨¦¦¦¡¦©¢§¤¬¡©¤¥¡¦§¤¨¡¨©¤¦¤¦ «¤ª¤ª¡© « ª¡¨¥§¥©¤­¡©¤¨ ¨£¬¤©¢ª¦«¢§¥«¤ª¥§¤¬¥ª¦«¦¨¦¬¡¬¨®¤¯¦¨¥«¥®¦ª§«¦¬¡©§¬¥ª£¬¥¯§®¦¯¦¨£¬¨¬¥®©¬¥±©­¢®¦°§­«±§®¨­«­¤¬§­ª«¥®¨¬©°©­¨®ª¬¬¯©¯¨±¬±¤³«­§¯ª°ª¬¦°¬±­±ª±«³ª°«¯©®«²©®°±ª³¬±«±¬²ª¯®³®³¬²®±©°¬¯­³ª¶®­°°¬¯­®¦­¦®«©£{ik]i]i`wn[{iWwbUqWUn[Ul_Un[MgbMfQOkUOg]QfYWl`[lk`ibSl`SgbSlYUfUSgUI]UKdOKiMDd[MgOMd[KbYSi[Mi[Qd_Wi]Yk]Wi][k]Wl][ni`id`nn]ln_on_rl_qd[q`UqgYriUnfYnWUl]MkUMfSKdSIdOK`I?gOB`ID]DF[?=]K?UBD[B:[B?QD?[D?YBFW?=]BBSIBU?F]?=UDBYDBY??[?D[B?WB=_B=UBBWB:UIBYBD[D?UB:[?BWBDW:?[DBWBD[FF[I?UIFYB?]?FWB?YFDYFB]SI]ID]KI[MM]SMbYSg[Uf`Ul`[l`_lo[ol]wl]nq`wl]wg]ud_u`Uqb[o[[nbWtfUk`Sn[Ut_QkYSk[MlUKfUKfUMiSIg]OdOIiODkSKfOKdWIiQKdSKdOMfQOb]QiQQkYYlWQk]Uo`Yog[odYukb{rozr{¨ ­©¯¬¨­§ª©««®ª°­³³µ³¶¯´¬³°´µ¡¹¶¢¹¶º³£º·¤¹´·´·¶·³»³ º¶ ¹· »µ»³¡¼·¥¹¸¤¼µ¢»¹£º·£½¹¾º¡¹»¥º· »¶¡»»¤»·¼·¦º·¡½¸¢¼¸¢¼º¢»´¡»»¤»¼¥½¶¹·¢»¹¡»¶ ¼¸ º¹¡»¹¡º·¥½º§º¸ ¼¹¤½º£»·¹· ¾·¤··¥»·¢»¹¢º»£»´¢¼³£º¶¢»³»ºº¹¢»´¢»·¤º¸¤ºµ »º¡Àº»³¥·¹¡¼»¥»¸£»·¡»¶ »³ ·´¢»¸§º¸¥»´¤»·¤¹¼¡º¶¡»·£¹¹¢»¹¥½¸¢¹· »¹¤»¸¤»º¤»´¡¼»¢º¶¥·»£¾¶¢¹º¢»¹ ¼· »»¥¹¹¡º¸¤»º¤º·§»·£¼¸¤¼»¡»¸£»·¡»¹¦º·¡º¹¡¼·¤·»§»· ¼·¤»¹¤»· »¸¤¹¹ »º¥»»¥¸· ·µ¢¸¹¤»¹¥º¶ »·¤¸¶£º¶¡¶¹¢µ·¡¹·£º³¤··¢»µ¶µ¢¹¸£·µ¹³¸··¶·¶ ·µ¡··¤¹³ ¼·¥¹´ ¹¶¶¸¤··¡¸²¼¸¸µ¤¶µ··µ· ¶µ º³ ·³¡¹µ¢»µ¶³¢¶·¡¸µ¡º¶£·³ ¸´ ···³º³¶´£·± ··¢¶¶³³¥·¶»·£¶µ¸³µ²¥³µ¡¹±¤´·¤´¶¢¶´£·´º··³¢¸´¢·¶¸° ³¶·µ¢³³·° µ¸ ¶¯´±µ² ²³·±¶³³°³³¶°°±´±·¯µ±µ®µ¯¡³³³°µ¯´°³®µ¯²±µ¯²°¡³²¶°¯¯³¯ ³°±­ µ­®¬³¬³­³°³¯¶«²¯®­°®¯¬¯¬®¯²¬­ª³¬¯­­®¯¬±­¬«°¬°«¬­°¦­¬¯¬¯¨¯­¬®¯¬±©¬¬®¬²«²¬¬||z|  ¡   ¡ ¡ ¡ ¢¡¡¡ ¢¡ ¡¦£¡£¥ ¡¢¢¡ ¢¡¤ £¡¢¦¡£¡¦¢¥ £¤¥¤¤¢ £ £¥£¢¨£££¡£¢¤¨£¦¤£¤¦ ¤¢£¡££¦¤§¤¥¢§£§¤¦¤¨£¤¥¨¡¥§¦¥©¥¨¥§£¨¢ª¥¦©§ ¦¥ª¦§£¬£¨¤©¥¬¤§§©ª§¤©§©§ªª¨ª¬©«§««©¨ª©«ªª¬©¨«««§©¨ªª«©ªª©§©¬««¬©¨ª§ª­¨¬ª«¨¬¨¬¬««®¬¬«­¬¬«­¦ª­¬§¬«­­©«¬ª¬­¬«¬¬¯®®©®ª¬«¯°­«®¬¬­®¬¬¬­«­­¬«©¤©wgoYl[xkUtlUqgQn]Qi`M`[Od[Ff`M`UKdYIdYK]YKbYKbbS_bUgdOg_Sb[I`UI`YK[SD`QD]WF]_D`YKYbM_`K`_I_`KYdM`bKdfKbdS``Mb]O]]M`UQd`Mdg[dbUgbWgl[fgWgkYigWiiUg_Qf]Qg[OgWIdWKdWF`SD_[DYO?[K?[KBSI?UK8SD=QK8M?3U?8OD8M?5M==O=8KD5K?8MF=O?8OB8MB3I??MD5IF:OF:KD5MB8ID8OB8UF:MF:M?8OD:MF:M?8Q=5QI?MF5UD:SD8SD:QD5QF:MD?OK?QODQMDQM?]QFQWMWSKWYM`UM__O`gUddWdgOnfYff_igSlgQfdUgdQlbSigUgfSgdQf]Md]QgbMg`QfbKd_Kd[If[DdUF]W?Y[K]S?[SBYS?[Q=`K?]U?[MB[SD`SI]QD_QB_WI[YD`YOddSg_WkdSgfYoiWqlgz|uxu«¥¬¨®©¯°­¬©¦¬¬­¬²°±±µ²±¯®²²µµµ»³´µ´³µ´·³»¶³³±²´µ¶¶³·º¶·²· ·¸µ¹····³· ·¸ ¶·ºº¶·¸¹ ·½¢¹·¢¹¶¶»£º·¹¹¸· ·¸¡·¸¸··· ·¹£·¶´º¡º· ºº ·¸¢·º»·¹·¸··¸µ¼£µ·¤º·¶·¶·¶¸¹¸¢¶· ·µ¶¸··£·¶¡·µ·¸·¹¸·¡·¹¶·¸µ£·¸·³³»´¸µ·µ·¶¸¢µµ¶·¡´··¸ ´¸¾´¢²·¡¸¸»¹¢µ½¢·º ¹· ·º ¹¸¡·¶¶¸ ·¸ ¸¸ µ¹¡µ¹¡¹·¡·¸¡¸·¥¶·¢º¸¢·¸£¶»¹»¥¸¹¡µ¸·¸ ··¡´·µ¸¡¶¶¶º¡¸·µº¢µµ···¸¡·¸¶··º¡·· µµ¡´···µ´¶·´·³¶¡´·£µµ´³·¹´¶´³²¸³¶µ³³µ³³²·¶¹µ·µ±´·¢´·µµ²¹·´µ¶¹µ²µµµ£³µ³·´·¶¸µ·³·´³·¸ µ´ ³µ³³¡³¸¢µµ³´³³³¶µ¶´¶³µ¶´³·³¶¡µ²³µ·µ´´´µ±·²³´´²µµ·³¸³·´³³²¶°¯¶´³±²°²³´´®°±°²®´ ´°®³´²®°²±®³°°±°¯°®²³°°°¯¯®µ³³®°®³²²®±±­²±¯µ¯²®¯­°¯°®°­±°¬®¯®°¯ª°°¬®­°«®²¬¬®­­®¬«¯±«¬¬¬¬ª¬¬«ª«©«­®©ª«¬®¨«¬ª­«¬«®©¨¬¯¨¬«§©ª«¬© ¢¡ ¡  ¡¡ ¢¡£¢£¤¢ ¤¤£ ¢¥¡¤£¢££¤¤¢¤¦££¢¤¡¦¦¤¤ ¢¥¥¥ §¦¥¦¥¦ §§ ¥ ¨¨¦¢¦¤ ¤¡§¨¡§¦¤¦¡©ª§© ¨¤§ ¨¡¦¢¨ §§¤«¡««£§¬£ª¢©ª¡¨¢«¦©¢¬£«¤¨¦¯¤«¡¬¤¬§¬¥¬£®£­¥¬¥¬¤¬£­£©¥­¨¬¥¯¥¬¦­¤­¦¯¨­¥®¥®¥¬§¯§­©°§­¦±¢®¨¬©®¨­¤¯©¯§¯§®¨®«­§³¨²¨­¦³©­¨®¬®§°ª±­¯¨±©²­³¬¯«¯«¯©³©¬¬±¬²«²¬²¬²«²ª³«²«²¬²¬³¬²¬±¬¯­±®³ª³¬³ª²¬¯®¯¬²¯±¬³¨³¬°¯¯¯³¬³°³«µ®³¬²¬³°µ±³¯µ­µ±´­²¬±©ª¥iqbr`ob~i]zgWt`Su`SoUQgUQlUQl_QkWMl_Qi]OiiUl`[n_Wi_QnWQk[Qk]Mi]MkYMfYOobMbgOidSk`QibWkbUiSMgUUgSSbUOfSSfQOdKMdOMdQQbQMgWKdYUk]Ui[Sg_Ug_Yrb]if[o_Ql_Si`Uo]Og[Sk]UfUKfQKd[FfKKfMDfKF`OB`OF`DKYI?[B:_I?]I?YD?[?DWD=OD:[B:YI?UBDWB:[I?W??WD?SBBSD?_K?W?BYBBW:=]B=WI?[??]BBUI?WDB[B=WFDYF=_DFWF?[IB]FB[O=]IFWKD[KB]MI]IF_SI_YKbOMb[OkWObSQi`[k]Ui_Qr]WlW_k`[rb[li`rnYtk]qi[qgYrdUr`]nbYnbWo_YlgWo]Ql`Sk_QnUQnUOfWQkSBkSKgWMdODiMFbWMdSIdQKkOMdMOkUIiUOdWKfQSi]Sn[So_So`[o[]qi]{kdwrk|xnw~¤¢­­¬°¬ ±²®©®®±´µ³´µ¡µ¸·±·°µ³µ´¡·· ·¶£¼¶¢¼¹»¹ º¹£¾¹¢¾··¹¼µ º·¡¼¼¦¹¹¼»¡½»¤»¹£¹¹ ½½¦¼½¤»¹¢½»¡¼¾¤¼¼¡»¹¨½º ¿·§½¹¦¼º¦¾¼¤»¾§½º¥¼µ£¾¹¤½ºªÁ¹¢À»¡¼¾£À¹¥¿º¡»»§¼¹£½¸¤¾»¥¼º¤½»¤½º¡º¹¦¼·¤¿¸¤¼¼¥¼»§¾º¡¼¸§º»¤¾¼¥»»¢»»¢¼»¢»º¤¾º¢½º¤¾¹¥»·¡»¹¥¼¼ »¹£¾·£¼¸¡¼º¢¿·£¾¹¢»¸À¹¦»¼¥¾»¤¾»¢½»¥¾¼¥»¹¢¿¿©»»§½¹¢¾¼¥¾»¨¾»¥¿¹¦¾¸¡¾¹¥»º¨¼¼¢¼»¨¼¹¦½»¥»»¥½¹¦¼¼¨¾¼¥¿¾§¾½¨¾»¥¾¹¥»»¦¾¸¦Á¹¥¾·¥»»¥¼º¥¾·¡»¹¤¹»£½¸§¾º¥¼¹¦¼º£»¹¤»¹¡¼»¦»¶¤¼¸¥¼·¢¼·¦»¸¡»µ£½»£¸µ¥º¸¤»µ¦¹¸¹¶¤¸¸¤»¹¢¼µ··»¸¢»·¡¼º§»¸¡¼¹¤¾·¢ºµ¡»¶¢»¶¢½·¢·¶¡»· ¸»¤··¥¹µ »¸¦ºº£¼¸ »»¡¸º£¼¶¢»º¢º»£¼¹¦»¸¥¹»¢¸» »¸ ¸· º¶£¹·£¹¶¢ºµ¢¼µ£¸µ¥·µ£¹¶ ¸¸¤··¡º¶¢»¶¤··¨¹³¡¶¹£¹¶¹µ ·µ¤¶·¢»³¢¹±¸³¡¶· ¹³¹±µ¶·´º³·¶·´¹¶¢µ³£·³¹³ ¹³ ¶¶¢µ³³³·®´µ¡·³´³µµµ±µ¯¶±´¶¶°µ± ³³¸±¶³°³µ­·®´²µ²³±­³¢¶¯µ¯³´µ³¢¶°³®²®°®²²¯¯³®±­¯®´°µ®°¬±ª³¬³®°¯³¯°­¯¬²­³­³­µ«±±³®³«²©°¬³­³¬±|~  ¢ ¡¢¢¡ ¢ ¢¢¡£¦¢¡ ¤ ¡¥£ ¡££¥ £¡¢ ££¤£¢£££ ¤¥¦ ¤¤¦ ¢£¡ £¢¢¢¥¢¦£¤¤§¡¤¡¥ £¥§¦¤¤£¡¥¦¨©§£§¥¨¥¥¥§¢¨¥¤¥¦¤©§§§§£§¦¥ª§£«§©¥¤§¨¥§¦«§§¦¦§ª««©¨¦©§©¦©¨©¤¬¥©©¨©ª««§«¦§¨¨««¨©ª©©¬ªª¥­¨¬©ª©­«¬ª­©««¬¦«­¬¬¬ª«¬¬ª©¬°©­©«®­¨¬©­«ª¬¬«¬ª­©«¬®¬®­¬«­¬®¬®©°©®­¬®­¬°«­­®«®­¬¬®­°±¬¬°®®­°®°®¯­®²³¬²®¬¬¨¦¦|¡gq]u_{u`unYunOndQi`Ql`IbSIf]OdWF`]O`]M_dOdiOb`Ug]MdYOdYI`YFdWD_YI`SI][FYbQ`YUd`M`dQ_UFdOIbQK`MD[OB]MDUM=WS=WK?WMB[KB[QDWSIYOD`QIYOK]MD`QM]OM`WQY`KbbQb[KfUI_QI]SF]QF][I[SB]UFYQBYQFUK:UMDUM:UM=UK?MB?QD:YD=QD:MB:Q?8UF3OB5MB=I?:MD:O?:QF?MD5M?=OF8MF8OD5MFBOD8IB5KD:KF:O=:MB=KF:MI5MI8MB5QB8MF:OD=MD8SD:OK?UD:OM?WQ?WI?UQ?QWIYSF]YI[YIYYK_WM]YO`WM`WK``K`]U`fWidWgbUk[Qg`UgfUdfMk`OgbMd_Qg]W`dOd[MibOgYKdWFdQKbYIYQFbYF[QK_SD`SB]SDYUF`YD`YF[UD_MDYSD_[K`]?b[DbYO`YM`UFd]MbYUg`Yir_kn_urlxqnw ¢ ©¦­§ª©µ­³¯²°±²µ°²²µ°®²¶·µ¢·¼¢¶·´·»¹¡··¸¸¡¹¹¶¹·¹µµ¸¹·¸¹· ·¸£¹· ·¸¹¹¡»¸¡»··¹£·¹¡»¹¢»»¡º»£¸º£¸»¡º¸ »»£¶¾¡½»¤¸·¢»¹¡¸½£¹¹¥·»¡·¸º¸£¸º£¸¸£»·¸»¡·º¢ºº¢»½£·»¤¼»¸¸¥·¸ ¶¸ ¸¶ ¹¹£¸¸¹º¡¹»¡·»¡º· ·»£µ¸ ¹¹£¸½£·¸¤¸º£¸¸¡¸···º¸£µ¸¡¹¸º»ºº£»»º¸¡µº¦··¢¸º¡º¼¡¹·¥¹º¡º¼»º¤¸·¡º¾£¹¸¡¹»£¹»£»º »·¡º»¥¸¼¢¹»¡¹»¢¹»£·½¡»º£·»¢»»·»¥º¸¥µ»¤·º£·»¢»»»¹¡·»¢¸½¢º¸¡¸»¡º· ¸¸¢º¸£¸¸¶º¸¹¡·¸¢··³¹·º¡º¸¡·¶´¸·» ·º¹· ·µ·¸ ·¸ ¶¹¡·³¢µº´º¡¶·¢µ· ·¸ ·º¡¸¸¡´»·»§¸¶¡µ¹¡µ·¸»¡³º¡µ· ···¸¹· ·¹¶¸¢µ¶¶· ¶¶£·¹µ··»¡µ¹µ¸¶· µ·³µ·³¡¶¹´·¢¹¶³·´·³¸³¸¡µ³ ¶·³· ¶´´·³·¡µ·µ¹£µ¶ µµ¶··µ±³²µ²·¡³²¡³µµ·¡²³®³µ³³´²·³¶²´±´ ´²²³µ²°³³²²³±¯³³±´³´°²²µ²³¡´¶°°±°±¸±²¯²®°®®±³±±¯±¯®µ±¬¯°¯²¬±²¯°°°°±®®¯¯°°®¯¯­­­®®±¯­°¯­¬±¬¬¬°«®¯®ª­¬«­®®±¬©¯­¯¬«¯®¬«²®¬¬®« ¢ £  ¢¥  £¡£¢¡¡£¤¢¡¢¡¤¢¤¦  ¥£¤¡¤£¤££££¤¤¥¦¥¥£¤¥¤£¤¨¥¥¦ ¦ ¤§«¡¦¢§¡¨¨ §¢§§ §¡£¢¨¦¨¨ § ¬© © ©¨¡©¥© «£§¦« ª¢©¢¨ ©¤¬§© «¨¦¬ª§©¥¬¥ª¡«£ª§¬¥«¦­£¨¤ª¦ª£«¤®£­£¬¥­©¯¢­¥®¦¬ª«¦®§¬¦¬¤®¡®¥°¦¬¦®¥®¦­¦°¨®¦®¨°¨¯§±§³§¯¨­¨¯©®ª±¦±§®¬°§¯¤¯¬­«®ª±ª³¦±«°ª®ª°§³§²®¯§³¬³®³ª³«³¬®¬²­¶¬³­±¯³®±«³­°­³¬³¬²­°¬²ª³¯³«³¬³±²°¯®²¯´®³­¹¬³²²®³¯¶¯²®´­´®µ°µ­³±³¯³®¶­³®¶­³¯´®³³´¯³¯³­µ¯³©®¨u~fq`xiqd|lYzbUwfSl]Qn]KnYUi`UoYMk`Yof[ngUn`YlSQnSIg_Si[Mg]MqUKg_UgUKi[Sf[QiSMgUOfQSiMDfMBbOFdKI`OIgKIbO?]QI`OK]MIgMKdOF_SKfMIkQMiSOfO=iMIbKIdKK`OOfOQbMMdSOgQIbQMdMK_QQ]KIdOF`OI_KK_S?_QF]F?[F?[ID_IDYD=_FBW==[DBYB?]D:[?=[B?S??UF:[ID[FB[?:Y=DYF?[??UF:YKFY?=[B:]FDUIBYD?[B?WFD[??WKBYB?[B?]FBWKDYIF`F=UOI[KB`KD]OK]FF`ODbSKf[IdQKfUIdQKfOSdYObWSb]Ki`OlUQo[Sr]Sg`Yi]SndUnfYo]Sq_Kl]QkWWn]Ql`Ql]Uo`Sn[UkUQnUOi[OfYMdQMgOObWQgQKiWMbYMkWQb[Oi[OlQIiSKiOQg]KkWMiYQkUKfUKl]OiUQk[Uqf[og`wk_xuowrx~{{¥ª¬ª´¡²²³³··´¶ ´·µ¶·³ ¹º£»¼§º»¤¾º¤¿º¤½» ¿»£½»¦Á¼¨Á»¡¾»¤»¼£½¶ ½¶ À¹§»»¤»º£»¾¡¿»¦¿½¤½¼¥Á¼¨Á»£¾¾£¿º¤¾»£¾¾£À»¥À»¥¾¾ªÀ»¤¿¹£¿Á¥½¾ª¿½£½»¥¾»¥¿¹¤¿½£¾½¥½¸¤Á½¦¾¼¦¾»¤Á»ª½¾¤¿¹¤À½¥½¿¦¾º¢¿¸£¾¼¡¾º¤¾»§¼¹¦¾¹¤¼¿¦¿»¦¾¹¥¾½¥¿»¦¾»£½¾¿½¦¼»£Àº¤¾»©½º¦¿»¤À¼¤À¹¤À¿¦¼¼©¿»ª¿½¤¿¼¨½¾¨»»§Ã»¦À»§Á½¦Á¼¤¾À§¾¼§À»¤¾¿¥¾·©½¾¤¾½¨½¼¤¾¾¦¾¿§¾»¬¾½ªÁ½§¼¾¨À¹§½º©Á¹¥»¼¨¿¼¦½¾©¿º§À»¥¾À§Á½¥¾¼ ½¼¦À¾¦»¼¥¾»¤¼¾¦¼»§¿»¤º¸£¿¹¥¼¾¤»»¥¼·£½»£½½£¼»¢»»¢¾»¦¼·¡¾¹£½»§¼»¢»¹¥¿¸¢º»¡¼º¤»º¦¼¼¥¾º¡¾»¢·¹¢º»¥¼·£º¼¤¾»¡¿»¥¼»¦»¸¦¼º¢»¹¦¹µ¡½º¦»¹§»¹¤¼¹¡¼¸¦¼¹¢¾º£»º¤»¶¤¼»¦»·£¾¹¡¹¹ ¾º¨º»¢»¹¤¹¸¥º¸¢»·º¹¡¹¹¤º·¡º¹¢º¸¤¹·¢»·¢¹¶¢»¸¥»¶§º¸¦¹¶¡¹·¡¹·¤·· ¶··³¤¹¶»¹»¹¡·´µ·¢··£¸º·´¡º³¹º ¸´ ¹´£´¶¹´ ·µ ³³ ¹¶¦·³¹´¶´»³»·¡·´ ¹´¡´¶¢µ·»³¢³··³ ¶µ·¯²³¶³¡·³·³£³°¸´³³²²³¯ µ²·³´±´² ³¯µ² ·± ³®µ±³°¡µ³µ±´±±­µ®µ¯²¯³®´¬ ±¯²®³³³®±«±¯°®²¬³­³®±®³®¯ ¡¢¡ ¡¡ ¡  ¡£   ¢¢£¤¡£¢ ¡¡¡¥ £¡£¢¤¥ ¢¤¢££¡¥ §¦£¥¥¢¥¤£¢££§£¥¥¥£§¤£¥§¦¨¥ ¤§¦¤¤¥¥¦£¥¡¤§¥¦¦¢£¦¥¡¨§¥¤¦¤¦¨¨§£¤¨¥§¦©¥ª¨©£§§ª§©¦¨§§©ª©§©ª¨©§©©¬§§ª©§§©ª¤©ª¨¦ª©©¥©ª«ª«¥©«­§ª®¨«¨««ª¨«¬«®­¬¬««®®¬«««®­¬ª®«¬¬¬­­ª¬®ª¬¬­®®­¬®¬±­®®¬«¬¯®­­¬¬©­¬¬­¬°¯®¬­±ª±¯®­¬­±¯®®²«°°®­²°¯­¯¬­®®°¬¯¯¬°®²¬¬±°±²²®­«§«~£rg~frf~w[xqYrfQo`Mf_OgYI`[MbYQddSffMddMb_QdYOdYK_YI_WK[YF_YI`WKYQIY`M]_I]UD[UD[OBUM?WOIUQDWOD[QBWQBYQ=Y]D]YIYUI_YB[UD[UD]YF]UDYWIYWFYWD[WBYQ?]UB[Q?WK?QM=UM?QKB[F=SI=YI:UI=UI?SD=SB8UM=OIBSO=WK=OO:OD8QMBOD=QK8OI?IB=Q:8OF:KD=OD:QB?KF:O?5MF=OD?M?8KD:KB:II:M==QI:IB:MF8OI?KF5OK?MF=MF:S?=KM?OD:OF=OI8MF5OD?QM=UI=QMBOO?QIIQM?SOBYM?UMDYSDWQDWSD]UFYQIYMF_QI`QIYYDY[M_]M[dOb_M``Md]MfYIb]M`bOb`QddMdgOdgSfdOf]Qd[IfWK_UM_SD_UDYYO]OD[QK[UBYUF[[M[[DYWBbQD]UFYQB]WF_ODYSI_WI`UDWUI_QD_UO`]M`dUlg[ktitu~z{~w~¢¬©±©³¬¶²®¯·³ºµ¶·º·» ¶¸¡¹º ¶½¡¹»¢»½º¼£º»º½¥º¾¡»»¡·º£··¶µ¸º ºº£·»¡¸»»¿£¹½¦»º¢»º¹½ ¹¾»»¢¸¼ ºº¢¶¼¤¸»¢¹»£º½£¸»£¸»¢»»¢»¾¤¶»£º¾¢¸»¤·¸¡½»¢»¾¥»¾¡»» »¼£º¾£»¹¡º»¥¸À¼º¢»¼¤·»§»» º»¡¸¼£»¼£»½£¸¼£º»»¸¡¹½§ºººº£¹º¢¹º¢¹¼¹º¡·¸¡·¾¥¾½¤¸¼º¹¢·¾£º½¤»»¡¸¾£·¾¥»º£º¼¤¹¸¦·»¢¾¿¤¸»¥¸»¡·½¥¼» º»¡»¾£»½§»½©¼½¢»¾¦»¼£¸»¥ºº¤º»¥ºÀ¡»½¨·½¥»»¢»»¦¸½£»½¤º»¡»¾£¸º¡º»£¹À£¸»¢º»£·»¤»º£»¼¥¸»¤·º·º¶»§»·£º··»¥·»¡µ¼º¹¥·¼ ·¼ »··º¥·º¶º£·¼¡¸·µ¸¢¸¹·¹¢·» ¶º¡µ» ·¸ »¹¢µ¸£³···¢·¸¡·º·½¢¸¶¢³» ··¹¸¦¶º¥·¸ ·¹¢¹¸¸º£··£¸·¡¶¸¡µ¹¡µ·¢·¶´¸ ³³·º¢µ¶¸¶¡¹¶¡µ¹¥µµ¦··¢µ·¢³··µ´¹³º³··¶ ³¸¡¶···¡´³¡±¸µ· ³¸ ·· ´¶¡³¶¡³·´·¡¶¶³µ³µ´µ´µ³µ³µµ³´´³³¡±¸´²³µ´³³²²µ³³´³³¶°µ²¶²³³µ±´³·±·±³³²²µ°³°±¯±±´±®³±¯®¬°¬¶±°°¯®³°³¯³®®°±°²°­¯°¯²­¬®¯«¬¬³±°¬®®¬°´­¯¬®®±«®¬­®¬¬²¬®­ £¢££¤ £¥¢¡¦¢¢¤§¤ ¤¥¢¡¤¤¤£¦¦¤¨¡¢¥ §¥ §§¥¢ ¨¢¥¥¦§¢¤£ª¢¤§¨ §§¥¤«¢©¨¥¥¨ ¥¥¦¡¨©¤© ¬ ¨©£©¤© ¨¤¬¥¨¡ª¢¬ «¢¬¡ª¢ª¦¬§¬¥¬¥¬¦¨¢¬¥©¥¬¡©¢®©¬¦¬¤¬¦¬¥¬¦ª¦®§¬¤«¥¬¤­§ª¬®¤¬¦®¦±¨¬¦±¡­«°¨²¥®¨¯¨¯©­«®¦®¥¯©¯§¬¬¯ª¯¨®§®«²¬®©±§¯§³¨±­®«®©²©µª¯§¯«¯¬³¬¶­¯ª²«³ª±«²¨³­¶­³©°«±¯±«´¨³ª´®³ª³¬´­²­±°´®³­³­¶°´­³¯³®µ¬³¬³®¶­³¯´±³¬´¯¶®³±µ°·¬³°µ­¶¯´°³²¶´´«´¬µ¯·®¶²¶±´¯¶°¶³¸°³³·¬·®²¯´³³°´¬²ªw¡n~i~kwit[~g]wdWu]Or]Sn[Sob[kbYlk[odUo]QlYSo[Qi[SfWQgSOdSMdYOiUOi`Sf[UbOKkMD`OKbMFbOF_MKdUKgOOfQQd]QibOodUkgYlfWn_SfbOk]Sk`Qi]Qg]UkYOiYSg[QgSMfWQgYBfMM`MF_MIdOBbQ?_MI]MB_IB]I?_B?`IF`IF`FD_FBYIF]KD[FI]KF[D?]IK]MKWF:[FB[IDWI?]?BWBFWIK[B?_KFWFDYB=WBBWBBUI=YBBWDKYBB_D?YFF[BB[FFWDI[DBbDD[KI[DB[FB_IF_D:WID_MB[MF]IDYOI_OFbDD`OD`KI`FIgODbSObQKiWKfQFdSMi]KdSQgUSiSMgWSf[QlYSk`Ql_Uq_Mo_[nbWn`UqbUnb_qdYo`Yn_Wk[OkWOdOQiSKgSIgQOfIDdQO_KIbSQfUQf]Sd_Sk]QgUOgOKiSFdOMbUMfSIdWM`WKkUIlYMgUQi[Woddqnbwrg|{o{lx| ¡¤§¬­­´°³±´·£»¼£»¸£º»¢¾»¤¾¿¨Á¾¦¿¼¨¿¾§ÃÂªÀ»¥¿¾¦¿¾¤À»§¿¾¨¿½¦Á¼¥¾»§À¾§¿ºªÂ¼§Á¾ªÂ½§Âº¦Á¾§À»£¾¾¤À»©½¾¨À¿¥ÂÀ¨Á½«Á¿¦Á¿§¾¾§Â½¥Ã¼¥Á¼¤¾»£¿¼¥Â½ª¿¾¨ÁÀ¥À¾®Â¿¨À¼¦À¾ªÁ½¦¿¾§À»¦À¾¨Àº¤¾À¥½¾©Á»§¾»¥¿½§ÁÁ¥ÀÀ§¿»¦Â»¢À¾ª¾¾¨Á½¦¿½§À½¦»¼¥¿»ªÁ¼¬¾¾©À½¨Ã¼¨¾¿¦¿¼¨Á¾©¾¾¨ÁÀ§¿¼ªÀ¾¨Â¾¨ÁÁ¬ÀÁ§À¹¤Â½¦¾Á¥¼¿¦ÁÀ¬Â½§¾Á§Á¾¬¾¼«Ã½§¾¾§ÀÂ¨¾¾©ÁÀ¨Â½ªÃ½¨¿¼§À¼ª¼¿ªÂ¼©À¾ª¼º¥À»¦Á¿§¿½¨¿¼©¿¿§¿½¨ÁÀ¨¾º¦»¾ªÁ¾§»º¤¾¼©¾½©¾»¦»º©¿¾£½¼©ÃÀ«À¼¦¿½£Àº¬¾½¦¼¹¨¿¹¡»¹¦Á¼¦¼º¨¼¹¤»»¥¿»¦»º¤½»¦½º¥¹¹§»»£»¸§¼º¨¼»¦¾»¥¼¼¥¼»¦¼»¥À¹§º»¥»½¦½»¥½¼¨½º©¾¼§¾º¦¼»¢¿¾¦½¼§¼»¤º»§»º¤»·¾¹¦»·§½¸£»¾¥½½¨»¹¤¾º¥»»§º½¦»·¥»¹§»»¥½·£»¼¤¼·£º·¤¾¹¤»¸¤»¸¤»¸¤»´¥¼¶¢ºµ¤¸¹¤¸·£½µ£ºµ¡¹¸¥º·£ºº£»µ£¹¹¢·¶»µ¤¸·£º¶¥»¶¡¸¶£¹³¥··¢»·¥¹¹¢º¶¢·¶£»¶¤·´¡¹´¤·³¢¹µ£¹³º´»¶¢º´£·´¶´¤ºµ¶³¹¹ µ° ´¶ »²¶µ¹´ ¸µ¡¶²³±µ²³±¹³·µ¢·¯µ³ ·³µ³´³µ°¶³¡³°µ±µ³³­´°³³²°³°£´¶°­´¯ µ° ³°³°³®°°²¯¶¡¡¡ ¢¡¡ £ ¢¢¢¡¢¡¡¡£ ¡£¢£¡¢ ££¢¡£¢¦¡¤ ¦£¡£¡¦£¡¡¤ §¡£¤¡¢£¦¥§£¦¡££¢¤£¡¦¦§¢¦¢¥£§¢¤£¥£¤¨§¦¥£¨£¡¥¦¤¥§¥©¤¦¤§£¦¤¨©¤¥§¥ª¥©©©§¤¨§¥¬¤§©¨©¤¦ª¦¬©©¦¨¨ªª«§ª¨§««©ª©«§¨¥¬ª¬¬¬ª®ª¬¨¨«¬«©¨«¨ª§«©ª®ª«­©¬¨¬¦«©¨¨¬©«ª¬¬¬«¬««¬®­¯«­­¬©¯¬­°¬¬¬¬¬±«±®©­®«¯¯¬¬¬«¬®¬¯¬¬¯­«°°±­°¬­­®°°­°¯®±¬¯®¬³¬±¬²¯°³®­­­­­¯¬³¯²±²²°¬²®­¯³­°²®­°¬°¬­§¤ngwdrdo`zt_q`Ot_Ok_Og`Qd]OgdQfdQd]MddSg]I`QMfUI[`M]QD`SFUQB[QD]UFS[IUMB]IDWQ?WMDUK?UQB[U?YWDWYFUSK][Q[gU[dK`bQg]M`YOb]If`Q]`M`UF`SF_SK]SD_OF_Q?WOM[MB]UBSQ=YKBUSDWM=SF8UI?WD?UI=SMBQQ8S==QI:QF:OB:SB:IF?OI:UF=MF:SI8UI:KI:Q?8QI8OK?MB:QD=KBBKF5OB:KF:KB:SD5IFBIB:MF:QF=KB8MF:QD?KD:QDBSF?QK8OB?QD=QI:KD?UI8OI?OI8UF=OI8OD=UI8QOBOD=QF:SFDUO?WMBWSFWSBUO?UMDYWD[K?UQDUQBYM?YQF[YIYYF]`Ib`OdYOd_Og`Ud`Md`O``Qb_MgYK`[K`UFfYB`QFYQF]SD[Q=[MDYI=YK?YQF[MFYQF]UKYYFbSD[Q?WM?[MF]Q?YIB_KD[UD[ODWUF_WIYWFd[IbdSgdWnq_qq`x{i|l~t| ¥¥ ¥¨±«²¯µ¯·³¸¸³µ¼»»£¹¼¤¹¾ ¼½¥ºÁ¤½½¤¾½¢·½¡¸½ »½¢»½£»¾£º»¡¹»¤»½¤º»¦¾¸¢»À£»¾£»¹£¼¾¤¸¾¢¾¼¡»»¨¹¼£»¼¦»¾©»¼¥¼¼£¾¾¥¾À¨»¾¡½¾£¸¾§»¸£»¾£½º¤»½£¾º¢º»¡»½¡½»¤·»¢»¼¤»»¤¼¾§»¼¡»½¥¸¹¤»¾¡¹½¤½»£½¾£º¾¥¾¼¢¼¾ ¸¹£»¼£»»£»»»º¦»¼¢¶»¡»½¢·¼¤»½£»½£¸½¦»»¸¾£¼»¦½»§»¼§º¾¦º¼¤½»¥¼¼£¸¿§¼»¤½¾¦¹¼§¹¾¥»½¨»¾¥¾À¤¼Á§º½©½¼¡¾½§¼Á¥¾¿¥º¾§¸½¢¼Á¤»¾¥¾½¤»»¤½¼£¼¾§»»¥º»§»¾¡¹¼£¸¸§»¼¦¸º¤»¾¡»½ª»»¢º¼¡»½¢¸½£¸¸£¸¾£¸» ¸»¨»º¥·¾£¸¾¢¼¼§¹¸¢·º¡¹¹¡·¼£¸¹¢·»¢¸¹£¹»¡¸·£¹»¤¸¹¡¹» ¶½£·»¤··¡¸»º¸ ·¹£·¸¡º·¡¶º ·¼¤ºº£·¹¡»º£¸»¦¸»¡·º¥º¸¤¶¼µ»¸¹¡··¢¶»¸¼¥¶¸¢º¹³»¡µ¹¡¸¹¡¸·´¾¡»¸¶·¡¶·µ³¶¹£µ¸¤´·µ·¢·º¡¶·¸·¶¸£·¹´·¡·¹¡··¸·¡µ¶³·µ´£µ¸³·µ¸·¸³³³´µµ³¸ ³³·µ´· ¶¶ ²³µµ³µ³µ¡´¶ ³¶³² °µ³³¡²·³µ ²· ·²³¶¡³µ¡´²·´²´³°²µ³³²´²³²²±±³µ®²±´²°³³®®°±³³¬°±±®³¯°°²®²²²®³®±®°«®­±°±¬³°±®°¬®²°¬®­¬®®®®®²® ¢¥£¡ ¤¥¥¡£££¤¡¤¡¥¤§¡£¥¥¥¦¥¤¥¦¢§¢¦ ¦¦©¡¥ £§§§ ¤¦¦ ¦©¦¤¡ª¨¥§¢§¡¥¢¨ ¥¡¥ ¦¡¨£¨£§£¦ ¬¡ª¢ª¡©¢¨¥ªª¤«¢¨£«¥¬¥­¤®¢¬£«¤«¥ª¥¬§­¥©¤¬¦­§¬£«¥¬¥­¥ª¢¬¥¬¨¬¦­¦¬¤¬¦¬¥®¦¬¨«¨¯¨®¦¬¦®§±¨««¬¤¬§¬¦­¤­ª¬©­¦¯©¯­°©®ª­«³§³§¯¬®¨±¨±«°­±©±ª®«±§³ª²ª³¯³©²«±¨³®±¬±¬®¬³­°¬´¬°¬³­°¬°­³«³¬³¬³­³®³¬µ¬±¬³²³¬¶¯´®³¬¶­´®´¬³®¶®°°´¬³¯µ­³¯´­³ª·®µ­¶¯³¯µ®µ®³­º³³±»°´°´¬¶¯µ®´­´±¶°·²·²¶­·°µ¯µ°µ³¶­¶¯¶°¡µ²µ¯´¨®¦z¡ui{iqb~i_zfSwbYo_Wkb]qd_kg]nbSobQo[WlYOf]Wi_SfUSiKDiQK`KI`SMgQI_OOdF?`MK]QKdQF]YQ_SQdWOgYQf]Ug[Wfd[fk_l`YobSo_Ui`Sg`Sk_SiUSgOKkSMdQMbQDbSQbQMbFKfOM`KM[KFfKK`UI_OFdIB_ID_DF]BK]OK[FF[DDYMFUK?_F?`DBUI?SID_BFWDF]F?]KD]MD[DD[I?]IK[BD[KB]IDSMD[?FWIB[BI`D=WKI[DK[FBYMI[F?WK=`MOUBIYIF[KF[QF`DD[DD]MIbFBdOI]MF[KBbBD[MD[FI]KF]OI_DI_MKYMK_OI`QI_OK`QF`OIbMFbOF`IK]QO_QQ`UQg_QfdSi[Ul_Ul]Yl_Sn[Sn`SoYOl[Si`Uk]WqWUn[QlQUn]QkWSfUMkUMiWMfSKdOBbOMgMKfMK`MKbSO_QKiWSgWMfQIkSK`SIfQMgQOiWMfOKfSMfYQ_SKbWQl_Un_Wki_ogYwkdzqlww~ §§«¢ª¥°·±· ¶··¼¢¹¶¡¹»¡½¾¬¾¼§¿½§¿À©½¿ªÂ¿«À¿§Ã¾¥¿¼¤¿½©À¾§Â½¨Â½¨ÂÀ©Á¾§Ã»§Â½ª¿¾¨Á¿¦ÅÁ¬À¾§Â¼¦¾¿©¾¼©Á¾«¿¾©À¾¬À½§ÃÀ¬Á¿©ÀÀ©Ä»¬¿¼¦¾¼§ÂÁª¿¿ªÂ¼¤Á»¦½¼¨À½¦ÃÀ¬ÁÀ©Â¾ªÀº¨À¿¬À»«ÃÁ§Â¾©¿Á«¿¿©½¿«ÀÂ¬¾¿ª¿¾«ÀÀ±Â¾¦Á¼¨¿¿¦¾º¦À»¦Á¿¨¾½§¾¼©¿¿§À¾§Á¼¦½À¬Á¾©Á¾¨À¿ªÁ¾¦ÀÀ©ÁÂ¨À½©Á¾§ÅÀ©Á¿®Â¿§ÄÃ¨ÃÀªÁ¼¦ÀÁ¬ÁÂ¬Á½§ÃÁªÀ¿­Â¾¨¿¾ªÃÂ®À½«ÁÂ©¿¾¬Á¾©¾¿¨Â½¬¾¿«Áº¦Â½¬À½¨ÀÀªÁÁ©Á½¥Â»ªÁ¾©Áº¦»º©¾¾ªÀ»©Á¿¦¿»­¾½§À½¦Á¿¨¾¾¥Â¾§¿½©½½ª¿»«Ã¾¨¿¾¥¼¼§¾»¨¾À¨¿¾¨Á¼©¾»©»»¥½¼©¾¹¨½¼¤¾¹¥Â½©Áº¨»º¦½¼¨¿»¨½¼¥¾º©¾»¨¼¸§¿¼¬¾¾¨¼º§¾»¦½»§¾»«»¾¨¾¼§¿º§Á»¥º¼ª»º¦¿»¤½¸©»»¨À¾§½º¢¿¸¤¿¿§¾»©½¹¥º»¥»¼¥»¼©¾¹¡¼¹¦»¼¤ºº¨»»§¼º¨º»¦½¼¤¼º§»»¨»º£·¸¥»¹£¼¹¦¹º¤¼»£»¸¦¾·¦»»¥»º§»·¢¹¸¥¹·¢·¹¤¹»¡··¤º¸¥·¶§º·¤»¶¤»·¢¸»¡¶¶¢¸´¦¶¶¤·µ¨¸¹£·µº¸¤»µ¦¹·¡º³¤·¸¤··¥¼º¢·º¡º¸¤º¶¢º¶¢¹·¡¹µ¤¶´ ¹¶ ·³»¶¡¸¶§¶³ ·³µ³£µ²¡¸± ³²£´²··´³¶±³µ¶²¡³±º³¶³ ³²¡µ°µ³µ³±°´²³²´¯µ±°²±°³¯ ³³³®³  ¡¢£¡¡£¡ ¡¢¡ £¤¥¡¢¦¢ ¢£¤¢¡£¢¥¤ ¢¤¢¤¢£¥¤££¢§¤£ ¥ ¥¢¡¥¥¡¡¤ ¦ ¥ §¡£§¨¡£¡£¢¦£§£¥¥£§ª£¤£¤§§¦©¥£¨§§©£§¥©¤£¤¦¦ª¤«¥¤§§¦¦¦©ªª£«¢£¨ª§¨©©¨ª¦¬¥ª§«©ª©§§«¦«ª­¨©ª«ª§§©§®¥ª©¯ª©ª­««©¬¥¬¬«­«ª®¬®ª«©¬«ª«©ª¬©««¯¬®®®­­¬®¯­ª­¯°«®«®¬°¬°°¬®­¬¬¬®¯­¬¬®°¬­®°¬¬¬°¬®®­¯°¬±¯®¬®­°­²²²¯°®³°®°®®¯®±«±­²¬¬±°¯²¯°®®²´¯°³²¬³°²²°°°®°¯¯©«|¤zql{bw]zfQtnQogSk`IibOfdQg`OgfIigK`WFfYK`_F`YF`WI_Q?]K=YQ=UY?WI?UF3SI?UI8SD:SS?SOIUKIW_IY]F[[?YUDYUF`QFYSM`WM[UI_YI`]M``Mi]Kd]D]UIbUB]W?]Q=`M?YO?YQDYS?YSFYK=UK:WO8YQ=UB8[B8QI=QD5YD8OF5S?:U==OD?OF5QI5KF:QB8QB:OF:QF=QB5QI:OI8QB5QD5QD:SF5MD5OD?O?5OM?QD8OD5QD=SI=MI5QB:MK=SF5S?=QM:OM?[M=SK=QM?UI:QF:UM:SQ=SF?QK?UD=SF8QK?QD8UM:QQ:QI:QK?QI8UM:UI:UI:QI?SI8UI=SK=UMB[M?YUMWUF]]F`YK`[I`[Mb`IbYIbYQ`[Kf_K``MggOidKi`Dd]K`[IfYF`SD`QB[OD_QB_S=YQB`O=WK:YK:[I?SM=_KD[SDYS?[QB`MBYQFWM?YQBYQ?YI=_O=]UD]M?`OF_`M`fQkfUngUklYnwixwxqx¥£¢¨®¬³²µ³·¡´·µ¸·¹ ·¹ »º¤¹½¤»¼ ¹½£»¿º¼¡¾½¢½À º»¢¿À¡½½¦º½¤º»¡¾Á£»»¤»¾ º¼¥½¾¢½½£¾¼¢¾¾¡¾¼¥À¾¢º¾§¼½£½¾£¼¾¤º¼¡¾¾¦»½£¹»¥º¿¢»»¦»½£ºº¡»»¡»¼¤¹¾¢¼¾¢»À¡¾¹£»»¦¼½¦»º£»½¦¾½ ¼½£»»¡¾¾¦»¼§½¼¤º¼¥¸¾¡»½£»½¤¹¾¢»¼¡º½£º¾§»»»»¤»¼¾¾¢»¼¢·»¢º¾§¾»§»¾½¹¡½¾¢»¾¤¿»¦»¾£¼Á¥¼½¢»½¤½¾¦»»¤¼¿¤¼¼¡½À¤¾¾¦½¾¤»Á£½»£½½¨¼Á¢¾½¢¾¾¤¾Á¥¾»¥¾¾¢»º¥»¼¤½¾¥»¾§¹º¡À¾¤½¾¤»¾¤¹À£º»¡º»¡¸¼¡»¼¦·½¦»½¢¸¼¤»¹¡¸º»»¤¼»¡¸½¤¹»¥¼»¢º½¡»»¢·»¥»½£»·¡·¼¢¸º »¸¡·»¢¶¸ ¹¼¡¹½£·»¦½»¡¹½¥·º¡¹º£¸¸¢·»º·£¼º·¸¢´º£¸½£¹»¡¸º»½¥¸¹£»º¸¹¡¹¼£ºº¢··´½¡»¼¢º¸¤º¸¡·¸¡¸º ·º¤µ·£·¸¢¸¸·º·¹¸»£¸¸´·¡¶···º¸£¶º¢·¹ ·µ¢µ·¹¸£¸¸¶· µ»¡·¹µµ¢¶·´¸¡¸¸¸·¸µ·µ ·¶´·¡µ·µ¹¶µ³µ³¶¡µ·´³³·¶¶ ·µ·³¡³´´²µµ³µ µ´²µ³·µµ³µµµµ·´µ ´·¡³´³´³³³¶±²µ·¡³¶²µ²µ³³²³±²´µ²²°¯³´®¯±¯°±®²¯±¯²±°´®²³°±®®®²®°±­®®±°¯¬¯±¯³®¯®¬«²­¡ ¡¤¤£¤¡£¤¢¤ §¥¡¨¤¡¤¤¨¥ ¢£§¤§¦££§£§ ¥§£¦¡§¤¨ ¦¥§§ ¦§¥¢¤©¡¨ §¡§¤«¡¨¡¦¨¢¥¤¨ ¨¢©¥¤¡¬ §¡¤¥«¤¨¡¨¢§¦¬£¨¢¬¤¬¨¨£¬¤«¥§¤­¨©£ª£¨£¬¦¬¦«£¯¨ª¨«¤©¥©¦¬§¬§«§®§¬ª©ª¬¦¬¨­©¬ª¬§®¨®¨¬¦¬¦¬©®©®¨®©¬©¬¦®ª±©°¬®©´§±ª¯¬±¦³ª±«­®±©¯ª³ª²©°¬²ª®¬³¬±«¯ª³¬±¬³¬³ª³©´¬´¬±®®«³¬±­±¬±¬³¯³®´¬±®³­´°³¯³¬¶°¶³³²³¬´¬³³µ­µ°´®±²·³³°µ¯³¯´²³°´®±®¶¯³¯´±³³µ±´±µ®¹°³³µ°µ°º³´°³­·²·°»­µ®³°¶¯·³·³·´¶°·³¹²·³·³·®´°¹¬¯¬¥~tktbo_{i]wq`wn_u`Yqk[rbbnbWofYr_So[Sl[SidQnUOkQQiSMdQO_QKbOIbDB]D?_MQ_MD_OI]QM`YM`UO`WQ_OQbODdIK`WOfOK`QKbYUb[Oi[Sg[WdWUk]Uk[Qg]SkWQi_MgSQnQIfSKgQOdSIdUMbUKdOK`QKgQM`OFbOFdKK_KF`ID]DF[KD`IB[DB_K=[DBUKF]KDUFF[FB[OB[DD]MFWIB_KF_OFWDB[D=YMFYFK]DBYODUKFUIF[MF]KKYMB_KK_UO[MD]KKbOO[QKfQK`SQ_QIbKD`KM]QI]MK`OKYOK`FD[ODWMBbKF_MI_QD[ID_OI[MF]IB`IBYIF]KF_II_SK]KKbQM`OMfSSdYOf[SbYOk[Sn[Wi[Sl[[lf_nf_of]oi]qf`rd_rf[ri[tfSt[Qt_QoYUl[M`WSdWFbSOfUOf[KgSDgQIbODbQObSMdMKbQOfSSfODdUIiQM`SIdQIfSIfQMdQKfQKi[Ui`Sn`[qf]otdwogxwo¦¥§© ¨¢¬­³¯µµ¤¸»¤¾»¨¼¾¤º» Á¹¥»½¤¾»¥¿Á©ÃÁ¤À¿¨ÃÁ©ÂÁ¬ÁÁªÃ¾§Á¿©Â¾©À¿¨ÄÁ¦ÁÁªÁ¾©Â¿«Á¿ªÂÀ«ÂÁªÂÁ¦Ä¾¨Ã¾­ÁÁ¬ÁÀ©Ã¿©À¿«Á¾§Á¾¨À¾¦À»§ÁÁ«ÃÀ¬Á¾¨Â¿¢ÂÀ«¾¾§Ã¾¬Ã¼©Á¿§ÁÁ§Â¼¦À¾«Ã»©ÃÂ¬Á¾ªÃ¿¦¿Àª¾À©Á¾¨ÃÁ©Á½©¾¾¬ÂÀ¨Á¼¨¿Á«ÁÁ©À¿¬Â½¬ÂÁ¥À¿©¿¿¨Å¿¥ÁÀ©Á¾¬ÀÁ«Á¾©ÁÁªÃ½©ÀÂ¬ÁÀ¨Ã¾¬ÁÃªÀÂ¬Â»ªÃÄ§Á¾­ÂÀ©ÃÁ¨ÅÁ¨ÂÁ¨ÃÀ¬Á¿­À¾¬Ã¿«ÂÂ¬ÂÁªÂÁªÃÁ¬¿¿¨Á½¨ÁÀ¬ÀÁªÁ½¬ÁÁ©À¾ªÀ¿¨ÁÀ­¾Â¬¿À¬À¾¥ÂÀªÀ½©À¿ªÃÂ§À¾ª¾¿©À¾§Á¾ª½»¨¼ºªÀ¾§¿¾¨À½©¾¹¨À¾¨ÀÀ­¾¼ªÁ¾¨À¾¨¿¿©ÀÁ§¿»§¼¾¨Á»¬¾½§¾½¬¼»©Á»¤Á¾«¼»¨¿¾¨À¿¨¼¾¤¼¾¨¾ÀªÀ»¦¾½¦¼¾¦¼º©½¾¨Á»§»½¦¼¼¨¿º©¿¼¥¼º¦¿º¦»º¨½½¥½¹¦¾¼«¼»¦Á»¥¾»­¹¼«¾¾§¾¾¥¾»¦½»¨¿»«»»¥¼¹©»¼§»¾¦½»¨»º©»¾§»¼§½»¥»º¦·»¤¾½¤¼º£»¹¦»»¨»»¦½¸¢½º¥¼¼§»¹¤¾´§½¸£º·¦»µ£»» »¹¤¹·¤½»¥»·¤¹µ º¼¢»¸¦¹·¡º´¦·¹§º·¥»¸¡·»¦¸³¥·´¦»¹¥·µ·¸¢¸·¥¹µ¢»·¦¹º¢»·£»µ¦·¹£¹¶£¸·¡¹µ¦··¦º·¶µ£·µº² µ³¤¶´¶²·²£¶µ¶´¡¸²¹³¡µ² ·´·³¡³³º±¡¶··´¶°¶²¶´£·±µ²³³ ³´´³³²¡²°³³³³³ ¡   ¡  ¡¡¡¡¡¢¡¡¢¡¢¢££ ¡¢¥ ¡  ¢ ¡¡£ ££¢¢¢¡¥££¡ ¤¡ £¤¡¡¡¡¡¦¡¡¤¢¥£¥ §£¦ ¦¡¤¥¡¥¥££¤¡¨£¤§£¥¥¦¤§¤¥¦§¤¢¦¥£©¤§¥¨ª§¡§¥©¥©£¨¥¤£¢§ª£«¨©¨©¥ª§©¨¨¦¨§¨¦«¦©©©§§§ª¥ª¨«¥««¬©«§¬¨¨©®©¬ª¬ª¬«®«¬¨¨ªª«¯ª¬­¬©¬¬­¬®ª­©ª©®¬¯¬­­¬ª±©ª¯®«®®®©¬¬®®¬¬­¬°­®©¬®¯¬±¬¯¬­­¯¯­­²¬¯¯¬°¯­±¬«­¬®®­±®°­´¬®­®°²²°°°¯²±¯¬²®®«²²¬¯±­±­²ª®¯²®°¯³¬°¯²®²²³µ°°­ª«|¦~zkdk]|iS{dQqkWknWqkQkdMlbOf]Og`Oi[Kg_F`bD`UKbWD_O?]M=[QBWQ?YM:UI5QK?QD:S?5SF?MD=UF=UF=QK=WF?UI?QO:YD?[M=QIDUQB]SFYUD]UB_YK[]I__Fd`Q`gMf`Fb_Id[I`WK]UD]Q=YQ?]M?YKDUM?[M:WODYM:WO5YK?UK8SI5WF=OF:UD5UB:OF5MB8OD:OD8KI8UD8QI?MD?MQ?OK:QD5QI8KI=MD0QF:UK=MF5QI:QM:OF5MIBQM:SI=UM=UQBUS?WM?WM=WODUMFWM?WK=UF=WMDQM8QK?YI:SO:SI=WM:MM?SI8SM=OF8QF=WD:SI=QI8MI:OF3UM:QD8YI8QOBQI:SMBYW?UOB]SB]SFYQI_YI`]I`_M`kQ`oWggWgfWglUggUgfSnnQgfSg_If`Qd_M`UBfQ:_YB_O?[S=UQI]I:YM:WU?UI=[MBYIDWODUSB]YDYM?YO=_QBWQD_Q:]QB_OBWQ?]UD]UI[YI_gQfgSloYql]uzb{k{|x¥§¡§¢ª§©¯µ°®°·¸½¢´½¡·¹½¼¸¹½»»½¦¹¾¤¾¾¢½¾ ¼¾£»»£¼¼¢½¾¤¾½¤¾¼¥ÁÀ¡»À§»¹£¼¾§¾¾¦¿¸£½¾¥¾¾£½½¡¼Á¢»Á¦»¿¤¾À£»¼¢º½£¾½£¼À¤¿¼¡½¾¤¾¾£»¾§¼»¥»¿£¾¾£»¼¡º½¥»º£»¾©¹¿¥¼¼£½¾¡¾¾©»Â£¹¿¥¾¾¥»¾¡»¿¤¾»¥»½¢»¾§»½£¾À¦¾½£»¿£¾¾£»À£¼½¢»¾¤¸¾¡¾¿¢½½¥»¾¥½»§½¾¥¸½¢½¾§¾Â¦½À¦¼½¤»ÁªÁ¿¥º¾¡½º§»À¥»»¨¿¿¦¼¿¥¾¼¦½Á§¾¾¥»¼¥¼Â¨¾¿§¹½¨½»¥ÀÁ¤¾º©Á¼¢»À§¾¾¦¼¾§»¾§»À§»»£¼¿§¼»¤»¾£¼¿¦»¿¨¼»£»½£½¼£»¾£¾¿ »½¢»»¡»»¡»½£»½¢ºº¡»¾¥»»¦¼»¤¸¾¤¹»¤¼» ¼¾¡¼½¥º»¤»»¥¸¹ »»£·¼¢¸¼¡º¸¡¹¸ ·º¤·º¡º»º¾¦¸º¡»»¢¹»¤½½¢¶½¡º»¢·º£¹¸£¹»¡º¸¥½· ¸º¥¸½¤´¸¢·»·»¤·¹»¹¤·»¢·»»¸¢·»¡¸·¶¸¡·º¥··¶º¸»£º···¡»¹¥·· µ¶£¶º¡´º ¶º£·º¡¶º£¸º·»··¢µ»¡»» ºµ£··£··¡·¸ ¶· ·µ¡µ·²·µ··µ¡³··³µ·µ¶µ¸ ´µ µµ¡´µ±µ¡µ³´´²·²µ°µ³·´¸³´·¶ µ·²¶¶´´· ³µ·µµµ±²³µ³µ¯µ¯²³°³³´°²·²µ²±°±³³±²³³¯²®«±²°¯³²²°°°³®°²°²°²²²±¯²¯¬²¯²¯±°¬°­¬¥¡¤¡¢¦££¡ª¡¢¡¥¦£¤¤¢¥¥¤¦¡¤§ ¦§ ¥¤ ¦¤ ¥¦¥§§ ¥§§¢§ ¦¦¥§¨¡©¢¥¤¡¥££¦§¥¤¨¥¨¢©¤« ©¢§£ª § © «¤©¢ª¤©¥¨¤«¢ª¤©¥¬¢¬¥¨£«¥©¡«¤ª¤¨¢­§¦¢ªª­§¬£­§©¥©¦­¦¨¤­¥¬§ª¨®©®§­¨­¦®¥°§®¦®¦®¬¬§¬©®¨­¥°§­«®«³¥¬«®«¯¨°¬¯¬¯¨±©°©®«±¬®¬®¨°©°¦±¬¯¬²©°¬²¬°©°®³®³¬³­³¬°®°­²¬´¬°¬³ª¶¬²¬³¬³°°¯´¬°®²­´©³®´°³¯µ­³®±°´°´¯³¬³¯³´¶®¶¯³±µ±´¯³±µ®´¯´³±¯¶±¸³²²´³³®²² ´¬¶³¹´´±¹³³´µµ¸°º³´°·¯´³¶²·®´³¶°µ±·²µ±·³¹±·µµµ¹³´¯²¤¯ª¤ iufi]~k]zl]xq]ukYxk[riWtfYrb]t`Qo_WnbOk]QkSMiUObOFfSIdQM_MKdMD_KB]KB_FDdF=_KDUD?`IF[KI]KF]ID]II[K?bKI`SB_KK`SMdUMfUMbUOg[Sid_kb_lk]in]qf[qbYn[Qn_Wq]QoWMkYOiUKkSFbSIfKIiSOfQIfMFiMM]MKbQFdSM_SB_BBdIIYK?]BB`MB_OK[B?`IF]FFYFD[KD_II]KD]MK]KO`MF[KF[OMYKB]QF_OI[OI]OK`KK_YM`QK`UUb[OfSQdWQg[QbSQb[MgUI`OK_WO`QK_SIbKF]MK_QB`O?_KK_MB]KF]MD_FB[K?`MM]IF]MF`KD]MB`MDbO?`QI_SDdUIbUFbSKd[Qg[Oi_Si_Uii[qk`of_ub`n`]ud]of_of[no]wn_tb[r`Qqb[o_OlSQn[Oi[KkYMlSFdQKdKBgUK`OMbSBfSK`SO`WK_UOkSQbWMfQMgSK`WKfWMdUS]QKgUMgYQfSObYSkg[og]uodrx]xnb~qiu~¢§©¬ª«®«²´ ³¶ ·»¥º¿ª¾¿¦Á¿©¾¾¨Á¾¥À»§ÁÁ§Á¾¨ÄÂ¦ÁÁ«ÂÁ¬ÄÁ©¿À¬ÁÀ§ÃÁªÀ¾©ÂÃ¨Æ¿¨ÅÀ®ÁÀ«Ä½¬ÃÁ«Ä¿§Á¾¬Å¿¬ÂÂ«Ã¾ªÂÃ©Á¾ªÁÁªÁ½©¿Á§ÃÀ¬Ã¿¬ÀÁ¬Ã¼©ÂÁªÁÁ¦ÃÁ¦Á½¬Â¾ª¾¿©ÂÀªÃÀª¿Â¨ÂÀªÃÁ­ÁÀ©ÁÃ¨Ã¾¬Å¿§¿¿©ÃÅªÃ¿«ÀÁ§Á½ªÃÃ¬ÃÀ©ÁÂ¬Ã¾ªÁÁ©ÁÁ¯ÃÁ¬¾¿©Ã½©ÂÂ­Á¾¬ÁÁ¨Ã¾¬ÁÃ¬ÃÁ¬Â¾­ÁÂ­ÆÂªÁÁ®ÄÁ¬ÁÁ¬Ã¼¨ÃÁªÃÁ«ÃÁ¬ÂÃ¬¿¿ªÁÁ«ÁÂ¨ÁÀ¬ÃÃ«ÃÂ©ÀÁ¬ÄÁ®ÃÂ®Â¿¬ÃÂ¬ÃÁ¨ÁÂªÂÁ«¾Ã®ÂÁ¬ÃÀ¬ÀÁ«À¿¨ÁÂ¬Ã¿§¿À¬Á½ªÃ¿«ÂÁªÄ½¬À¿§ÂÁ¬Ã¾§À¿¦¾¿¨¿¾©Â¾§À¿¬¿¿¨Á»¨ÀÀ¨¿Á§ÁÀ¨¾¼¥À¾¨À¿¬Á¼©¼À©Á¾©¿»¨¾¾¨Á¼¦¿¿¨½À©»»¨½¾ª¿¾¤Á¿§Â¿¨¾½«À¿§À»¦¿¾¨À¹©Á¼¨½¼ª¾¾¦¿¾¨¿¼©¾¾¨¿¼¦¾¾§½¼¥Á½¦¾¾©½¼¥À¹§Á»¨½¾¨¾¼¤¼¼§¼º§»¼¥¿¼¨½½§»º¥¼»¥½º©¼»¥»º¤»¼¦º»¥¼¼£»¼¤½»¦¾»¦½º¥»»¦»¼¨¿¾©¿»¨¾»¨»¹¦»º«»¶¢»¶¦¹º¨»º¤¾¹¥¼»¤»º¢¼»¨»·£¼»¡»º¤½»§»·¦½µ¤¸º¤¹º£¹µ¡»·¡º·¥»»¤»º¥»¶¤¸»¥º¸¦ºµ§¹¶¡»·¨¼·¢¹¹¤ºµ¢¸¸¤º´¤¼¶ ·¶£¹¹ ·³ ¹²¢´²¡¹µ£·³¥·´´± ´¶¢³·¢·²¡´´¤·³¶³¢¶²¡»³¶³¡¹´¡¹³³°·´¡¶²µ´µ´£µ²¶®³³µ³²³ ¶®µ¯µ¡¢£¡¡¤£  ¥  ¡¡¡ ¢¢¡£¡££¥¡¤££¢¢¢¢¢ ¦£¡£¡¥¡¡¦ ¡¦§£ ¥ ¢¥¦¦¡¥¢§¥¨¤¦£¤¥§¥§ ¥¡§¢¥¦§¢¥§©¡§¤¥¦¦¤§§§¥¥¨§¢¬¤¦¥©¥©£©£££«©¨¨«¥¥¥«§§§¨§¨¨«¤¬¦ª¥§©©§©¨©§«ª¨¦¬¨«¥©©¬©«ª®§¬§ª«¨¨¬ª§ª¬««©«ª¬«­ªª¨­©®¬®«°©­«¬¬¬«­«¬¬¬©¬¬¬«®©®®«¯¬¬®¬®²­­°«­­­¬°­°«®®®­¯«®¯¯¬°¬­¯®¬­©¯®±®®­®­³°²¬±­­®³¬²°±®±¬²°±¬°­®®¯°µ¬°±°®¯®³°²±±®®°³²³³²¬­¦¨¦~qx[gWz`StlQniSgfUlbQkdQlbQg`Sk`KglOg]DdM=`Q?[IBYIBWW?WK?UM?UF?SF8U?:MI5OI?QI8UI8SI:QB:SF?MI=QI5UD:MIDUK?YM8UMBUKBUWD]UI_QBYQF`WO]_Md`QfbYd`OgbQg_I``O`WIbWK`WFbUBbQDYU=YM=_SDWUDYQB_Q?[UBYM?WI=YWIWUBWK:UI=SD8SD5OF:MD8MF5MI5QD?QD:OK?OO?QF5QDDQI8SIBSK?OK=QK?SIBUM?UM?WIDUWKU[IYbI_`Q_bI_]D]YO`[K[YI`MBYSDYQ:]O=UQ:[K:YK:SQ=UD=UM8UF?UD:QF:QI?OD=SB8MI8QQ5YB3UQBMF8QM8WOBSI=WO=WSFUQ=WYD`UM[SI[SI`YOYYK`[Id]I`YQbQFgWMf`Ug`QkfQigSqfMi_Ig]F`]O`[Dd[MbSD`M?_K?YSD_MBYQ?WO?[M?[K?WMBYM?YKBYKBYMBYD?YODYKBYM?[Q?[Q?]Q?WQDWMDbQIb_QddYknYorWog_ttizrzt~|¥£©§®ª­ª³´³´º£·»¤¹»£»¾¤»»»¹¥½À¦½¼¦Á¼¡½¼£½¾£¿¼¡¹º¡¼¸§»¼£¾½¨½»¦¼¼¢¾¿¤¾¿¥½»£¼½ ¿¿§»¼¡¼»¦½¾¤¿¿¦¾¾¢»½£»»¢º¾¢Á¿§¾¾¢½¾¤¾¾§¾½£¼¾¤»¿¤½¾¥¾»¤½¾¦¾¾¥»¿£À¾©»½¦»½£½¾¦¼¾¥º½¥À¼¥¾½¥¾½¥½Á¢½¾¤¼À¦»¿£»À¨¾À§½¾¦¾¿§»»©»¾£¾½¥»¾¤»½¥¾À¥¿Á©¿¿§¾¼½¾£½Á©¾¿¤½¾ª»¾§¾Á¥»¿¨¾¿¨»¾£¾¾¦½¿¦Á¾©½¿¤»¾¦À¾©¾¾¦¾½¥¾¾§½À¥¼¿ª¾¾§ÀÁ§¾À¨¾¿¥¾»¥½À¥¾À§»¾§¾¿§»¾¨¿½£¾»¦½Á¥¼½¨½¾¦¾¾¦»¿£¾¾¢»¾§½¾£¾½¥·½¥»º ¾¼¢¹»§»»¥»º¥»¼¢ºº¥¼¼¤»»¥¾¹¡½½¥¹»£º¼¢º»¢·»¡»»¡»»£·» »º£»¼¡¸º¢»¾ ¹¸º¼£¼º¡¹¸¡º·¡·¼¢·¹¢»»¢º»¢¹¼£»»¤¹º£»º º»¢º»¥¹¸¢º¹ ¼»¥·»£»· »»¤¹¹¡¸º¡¸¾¦·¸£¸¸¢º»¤¸» ¸·º½¡¶º¡¸¸ »·¡µ¸£·º º¹µº ·¸¢µº¤¸· ¸»¶»·»£¸¶··¢·¹¡·º··¡·¸¢·¹¶³µº¡¶···¡µ¸¡µ´´µ ·¸´¶·µ´¶¶¸¥´³µ´´·´³µµ³·¢³¶´··´³·´³³¶¡³¶·³ µ·³·¶³´·¶³´²´´µ·²³´´¯³±¯²³²´²³µ´¯²²°³³²³²²±°²³±°®±³³¯²±³¯´®²°¬°±®²¯®°¬­°¯®±¯° £¤¦ ¤¦¡¢¢¡¨£££¦¡¤§ ¤¢¤ ¥¥£§£¦¤£¤£¤¤£¨ ¨¤¦ © § ¤¨¢¨¥¤§¨§ ¦©¡¦ ª¦© ª §¡¨¢¥¢¨£¤«¢££¬¦¨¤«¨£¨¤§¡§§¨ ª¦­¨ª¤ª ­¤«¦§¢ª¨¬¤¬¦­£«¨«¤°¥¬§«¡«¨­¥­§¬§¬§«««¨®¤°©®¦¬¥¬©«¦®¦¬¨¯¦­«²¦¬©®§°©±¨¬©³¨®¨°©¬ª¬¨±ª±¬¯«°¤¯ª¯©®¬³®³ª¬«²«®¬°®³«³ª¯¬´ª¯­´¬³¨±«®¬´¬µ®³ª´¯´¨¯ª³®³«³¬µ­³¬³­³¬³°´®³°¶¯²¬µ¯¶®µ®³®³¯²²³­³¬´¯³¯·±´¯´±µ¯´®³°´°¶¯´±¶°·±´²·°´®·´·²µ´¶®µ¯¶³µ±´¯³´³±·¯µ°·´·²·®·­¶³±©²©¡or`k`zr]{oYun[qbWrf]xkWqgbto]un[ld`q[OkUMfQMbKIbSK]SM]KK`BI]DD]D=[DF[OD]IK[DB[IDUIBWIIbFFWMD[FB]FD`QK_FI_OBbSK_QK`WKdUObUOgWQd`Ug[Sn_Sof]odYtbYodYndWl_UlfQqgUn`Mn]Oi[KkWSnMM`OOdSOfYKdMOdUDbQS`KQ_OM_[BdYF]KF`K?_MD]IB[KBUIFWDI[FF_MMWKF`KB_DM[OI]MI_QK]QK[MF`OM_QM`QI_YO]Y[bfUgb_ii_no]oiWo`[lgYl_SnSIdUOb[MfQQbUFbOF_SK_QMbIIbK=]IM_OD]KD]KF]DD[FF[MF[FD_F?]MKYMD]QDbMD`OI`MFdSK`QD`MIdUOdSKbQMgSSbSInUOg_OifSk`Fl]Ql`[oi[onbol]ui[ok_wiQt_WnYOq[UiYQlSFfQIbUIgQKdUIdSM`QDfQIbOK`ID`QI`MK`MK_SMbOFbMMbQK`OM_SQbOMfWObUMkQQg]Uib[kl[wl`uq[xkd{wu ¢¥«ª©®´¯®°¯¶º¦»¿¦º»§½¾¦ÁÁªÂ¿¬ÁÀ©Ã½¨ÂÀªÁ½§Á¾©Â»§À¿¥¿¿§ÁÁ¦ÁÁ¬Á¾¬Æ½¨ÂÁ¥¾À¨¾¿ªÆÀªÁÀ©ÁÁ¨Ã¿¨Á¿ªÄ¾¬Ã¿ªÁÀ¬À½§Á¿¨ÃÀ©¿Á¦¿Á¬¿¾¬À»§Á¿©ÁÃ«À½¨Á¿©Â¾¨ÁÀ©Á½¨¾ÀªÁÁ¬À¿«ÃÁªÁ¿ªÂÀ«ÂÀªÂ¿ªÁÁ«Å¿¥ÃÀ«ÂÃ©Ã¾ªÁ¾¬ÁÂ¬ÃÁ¨ÄÁ¬ÁÁ«ÄÁ©Á¾¬ÃÃ¨Å¾¬ÅÁ¬ÂÁªÂÁ©ÂÁªÁ¿¬ÁÀ¬Á¾§ÁÃ¯ÄÂ©ÁÁªÆÁ¬ÂÃªÂ¾©ÁÄ®ÁÁ­ÁÁ¬ÃÂ¬ÀÁ¨Ã¾¬ÀÃ¬Â¿©ÄÁ¬ÃÃ¬¿¼¬Ã¿¬ÃÁ¬ÃÁ«ÁÂ¨ÆÃ¬ÀÁ­ÀÁ¬ÀÁªÃ¿¬ÀÁªÃ¾¬ÁÁªÃÂ¨ÃÁ«ÂÀ§ÁÀ¬ÂÁªÁ¿¨¾¼«¾¾ª¿À«À¿¨Ã¸©½Á§À¾¦¾½§Á¼«¾¿¦¿½§ÀÀªÀ»¨¾¼§¾¾©¿»¨¿º§¿¼ª½½©½»©À¼¨¾»¦¾¾§À¼§¹¾§¿½§¾¼¬¾½§¾½¨¾¾¨½¼«¼¼¦½¼¨½¾¨Á¾©¿½§¾»¨Â¼ª¾À§¼»¥¾¼§»»§¾»¤¼»¨¾º©¾¾¦À¾©½¹¨¾¼¤¿¾¨½º¦½»¥»½¦¾»§¿»¢º¼§¾·¨¾¾¤Á»¤¹»§¼¹¡»»¦½¼§¼»£½»¨½º¥»º¨»·¤º»§»»¦½»¦½·§½º¦¹¶¦¾º¥»»¦¾· ··¥»·¤¹¹¤»¹§»· ·¸¤»·¡»»£··¦¼¸¥¹»¦º·£»·¤º¶¥´´¢»¸º¶¤»³¦·¸£¹·¡··¹·¦¸· ¹·¤¸·¥¹¹£··»¶¢¶º¢¸´¥ºµ ·¸¢·µ£¹³¡·´ ¸³¢³³ ¸··¶¢µ±¸³ ·´£·³ µ´´³¡¹²¢¹±´³¡³±·± ¸³ ¶³³´ µ´¸² ¶²¡´³ ³²¢´±µ²°³¡³²³¯· ¡  ¡¡¢¡£ ¢¡¢ ¡¡¡ ¡¢ £¡   ¡¥¤¢¢¢££¢¤¡¢ ¡§¢¦£¤£¤¥£¥£¦ £¡¦¥§¡¤£¢¥§£¦¦£¤§£¦¥¨¦¥¢¨£¥¨¥ ¤£¦§¦¥ª£§¦§§©¤¦§©¦¨¦ª§§£§¤ª§¦£¬§¨¦§¦©¨ª¨ª©©¦«§¨§©¤©¥«¥ª§«©«¨©©®©¬¦ª«¬ªª©¨««ª®¬«¨©¬¬«­ª¯©¬ª¬«¬¨°««¨«¨­¬¬¬®¬¬ª¬ª®¨¬©®«®§¯ª­¬±«¯¬­ª¬«¯®«¬®®«­®¬®¯®¬¬°­¬®­°¬®¬°±¯°®®°©¯²²¬¯«®¬®¬²­³«®­¯¯°­±°°°³°¯²°°®¬²°°®±­®³°³²®²¬®­°®°®¬©ª«¡unz_fY|lUtn]nkUokSldUifUoiUlkWirS``Mk]DgMB`M?[M?YS?UI5WM5QB8M?5O=5OF=Q=:SD3OD:IB?O?5OF:SI:UD:OD?QD?SD3YK=SI:UK:UO?QMDYI?YODQMF]OF_WB[bQ]bIgfQd[QgYKd]Mg_Sf_Qf_Sf`Of]Ok[FgWFdSD`S?dUF[QD]S?[OFSMD]M?YSDWQ?_I:YMBUM=YK=YD8UQ?SF?SB=SI:S??OF:YKDYK?QF?UM?QKDUM=[UDSIDWODYUBYQFYQF]YKW]U[i]dq[guYliQkdOfgMbYFgSI`WKbYI]OB]SDUOBYO?YMDUM=SI=]I=UK?QK5QF=SI=UI:UD?QM:QK?WM=UI:SI=QK?WK?UKB[IBWM=SKDWM?_OD]MBYO?[UD[YI]UK`]M`[MfYOd`SglYinYrnYnnYolQqfMk`Qk[MkYFdWK`SIbQ?bSB_KB[M?[KDWM=WF:]K=WM=UI=YK?SM?YM5YMFUOD[O=[K?[MFYK=[O?_SD[KD]SK`[Q]_QgdWik[lqQtk]ux||££§¥ª©°°°¯®²¶´º º¾£º½¥·½£½¾¤¼À£»½£½¾¤¾¾¨»¼¡»¾£¾¾¥º½¥¾½¤¿¾¥½½¥¼¾¦¾À£»¿£¾¼£¿¾¦¼»¥¾¼£½»¤¾¾¡¾¼£Á¿£½¾§»¼¦¾»¢½¾¤¼½£½º£»À¤»¼£»¾¥¾¾£½½£À¾¡¿¾¨¾Á£¾½£½¼¦¼½£¾¾¢À½¥½À«¿¾£Á¾§½¾¥¾¾¦½À¤¼½¥¾½¥½¾§½¾¤¾¾¦¼¾¤½À©¾¾¦½¾§¿¼§½½¤¿À§¾½©½½¦¾½¤ÀÁ©º½¥¿º¤½À¦º¾¥¾¾©À¾­¼Á©¼¿§»¼¥ÀÀ¥»¾¨½¾¤½¾§½À£½½¥»¾§½Á§¾½©¾À§½Á¥À¾¦¾¾§¿½©½¿¤»¾«½Á§»¾¦¾¾¥»Â¥¾À§¼½©¼¼©½À«¾¾¥»¾©¾»¢»Á£»½¨¼¾£¼¼¦·¾¤¼¼¡¸½¦¼»¥½½¦»º£½¼¦¼»¥»¼¤¾»¥»º¡¸º¡¹¹¥»¹¥¹º¢»º¡º»£»¹ ¹¹¤»¹¶½¡¼»¤¸¹¡¸º£¼»£»¾¥º·§ºº¤¸¾¤º½¢º»¢»»£»»¢»½¡º»¡»»¢··¡·»£¶»§»¸¤º½·º£¹» ¸¹£·»§º¸¡·»£µ»¤º» ·º¡¹¹£º» ·º¢»·¹¸¢·¸¡µ¸¢·»¡¸µ¢»¹ ·¹ º¹¢·¸£¶¹¡¸·¡º¹£¹»¥º»£·¸¡¶º¤½¸¡·µµ¹¥¹· ¸· ··¡¶· ºµ£·º¡¶···¢·¶¢µ¶·³·³µ¸µ³¶±³´ ·³´µ±³´µ£¸´µµ´·³¶µ¹³²µ¶±µ³µ¡µ²´´¢³··³³²£²´²´´µ²²²³³³±³²°´²±°®®²®®¯±³´°³³¯°°²°²¯¯±±´¯²³°°²³±­®°°¯¯¬°¬®£¡ ¤¤¡¤¢£¥£¥¤  ¤¤ ¥¤¡ ¡¦¦¢ §¡£¤¥£¦ § §¦¤£¤§ ¨¥§¡¨¥¦¨¡¨ ¨¨ ª¥¥¥¢¦£§ §¤§¡¥¢£¢«¤¨©¡©¡© ª£©¥¦¤©¥©¢¥¡¨£¬¡¨¡¦ ª¥©£¬¥¬£¬¤©¥©¡©§«¥ª§ª§¬§¬¡®¨¬©¬¥¯§¬©¬§¬¦«§«¤­¨¬«¬¥¬¦¯§­¥¬¬®¥«§««­©­§­¥«§¯¬¯§­¥­¨®ª°¬¯¦²ª¯¬¯§±¨´¬°¬±ª³©°¬°¬°¬±©²©³«®¬®«°«±¬¯®³¬³®°¬²ª±ª°¬²­°¬³¬±¬³¬²¯±¬¶®³¬³¬³«²¯³©³­¯«´¬±®³°´¯³­µ²´¯·­³®¶²³­µ²²¬³¯µ³³¬³¬µ²²­µ®´¯µ³´±³´µ®·²µ³·¯µ³¸­´´¶±¶¯¶³´²·°¶³¶³¸®³«­ ¬~§rxfg]nWxk]xibqi[ui[uf[og[ui_nu[lf]kbKnSOdMMdKD`SKbKKbD?WBBUIDWFB[8DUMB]KD[D=SMDSFBUDB[KK]MDbOB`FIWQK]KD`OO]KF]M?`KK[QFbKIbQO`YKfSMi[Udb]ikWqgWnd`wiWnnYqkYqbUto[oo]lgUu_So[OgWKnSMnYQfSKiWIiOQbOOiKK`MK_QFbIK_MQ`KK_MK`QD_WF_MI_MD_OMYMB[FI_KO[QI_KK[MM_QM]OQ`]ObSKgSQ`]OdQSfSOg[Qdb`gibnxinufwobrn]ro_qbUod_lk[n`UoYQiYSiSK_SBdSM_SI_QI`OD`KFbMD_KM]OI`IM]KK_QF]DD`MI]FF[OFdQK_MFbSD_OK[MI_MKdWKdQM`WSdWOf[Oi_Oi]UgbQk`Uk_Sod]ndbni[tlfqibqk_wg[q`WubWtbUo]Sl[Mn[Ok]MiMIkUKfQM_KBfOFdOK`KIbKFiSK`OKbMI`OM_OK_SI_QFbUMbQK_OF`YUbOKgWOd`SgbWif[okdqnbzt_|ri{x¡£ ¢£¡«©¬³³²³³µ®³º§»½¨½¾¨À¾¨ÀÀ¨¿À©¾¿¨Â¿¨Á¾©ÀÁ§Á¾¨ÁÁª¾¾ªÁÁ§ÂÁ¨Â¿©ÃÀªÄ¾ªÀ¿¨¾ÀªÃÀª½Àª¿Á¦Â¾©ÁÁªÂ¿¬ÁÀ¦ÁÂ©ÃÁ¦Â½§Á¾¬ÃÃ¬Ä½¨À¿¬ÃÁ«ÁÁªÃ¾¬ÀÀ¨ÂÀª¿Á®ÃÀ¦ÁÀ«Ä¿¬ÂÁ®Á¾«Á½«¿Á­ÆÀªÂÁ¬ÀÁªÃ¿¬ÁÃªÁ¿¨ÁÁ«Ã¾¬ÃÁ¬¾¿¨Ä¿©ÁÀ®ÃÁ©ÃÁªÂÁ©ÃÁªÀÁ©ÁÁ¬ÃÁ§Ã¾¬Á½¬ÂÀ¬ÂÀ«ÁÁ®ÃÁ­ÄÁ¬ÃÂ«¿ÂªÀ½¬ÂÁªÁÀ§ÀÀ¬Ã¿¬ÁÁ®Ã¾©ÃÁ¬ÂÁ¬ÁÀ¨ÃÁ¨ÁÄ®ÃÀ©ÃÀ¨Á¿®ÁÁ¬Ã¾©Á¿¬ÀÃ©ÁÁ®Â¿¬Ã¾©ÀÀ«ÄÀªÁ¿¨¿¿¬Á¾¬ÁÀ«À¿¨ÀÂ¨ÁÁ¬À¿ª¿¾¨¾¾©Á¾¨ÁÀ¨À¼©¾Á¦¿¼¤Á¾®Á¾¨À¾¥À½¦¿»¦¾½¥¾¼¬¼»¬Á¾¨¿»¦¿À¨¾¼¦¿¿¥À½¥À¹¥¾¼¨¾¿©Â»¨¾Àª¾¾¨ÁÀª¾»¦¾¿¬¼¼«¾»¨¼À§¾¼¥¾¿§¾º¬¿»¨Á»§¼º¥»¼¨¼º«¿¼§¹¹¨¾ºª»¾©¾»«¾º¦À»¨¼½¦¾¹¨¾º¨¼¼­¿»©¼·§½·¨»¹¤¸¹©¾¼ªº½¤¼¼¥¿¿¦½»¤Áº¨À½¥¾½§¾º¨¾»©¼¾ª¾º¦¼»¨½º©¼¸§¾»¥½»¨ºº¤º¹¦»¸¥¸¹¦¼µ§¹¹¨»·£½¶¨»»£··¨¹º¢»·¥»·£»¶¤»¶£·¶¢·¶¢º»¦º· ¹·¡¼·¥·¸¦¹»¤¹·¤¹¸¦º·¢½¹£º¶£¶´¥·¶¢¹·¥¼· ¹¶¡¶´¨·¹¤·´¹µ ¶¶¢·´ ·³¢³² ·±¡µ´¡·³ ·³ ¹³ µ³¡¸´¢³´ ¶µ¡µµ ·µ µ± ´±µ° µ° ³³´³¶µ¢·® µ³ ´± ²¯³±·¡¡  ¡ ¡¡ ££ ¢¡¡ £ ¡¡ ¡¡¢£¡ ¡ §¡£ ££¡£ ¢ ¡¤£££££¡¡¤ ¡ £¢¤¡£¥¦¥¢ ££¤¥¡¦¡¤¢§¥¨£¦¥¥¥§£¥¦§¦¢¥©£§££¢§ § ¥¦©§©¥¦¤§¤«£ª£¤£§§©¥ª¤©¥¨§¨ §¦§¨§§ª¥©§¨¨¬¤®ª¬¨¬¥§§ª©©£¬¦¬§«ª¬©«ª¬ª¬§¬«««ªª²§­«««®ª­¥¬¨©«ª¬ª¨¬©¬§¬ª¬«¬«¯§®«ª¬°«¯­¬­­«±¬©©®«®¬¬°¯¬¯¬°®®­®¬®¬®¬±­®°¬«²¬²¬¬¬¯©¬®¬¬°¬®®¯¯±¬±­®²®¬±±²¬²±±­¯±±®±°­¯°§³­²¯°²³¯³­±ª«§z¡~x~]gS~`QtgQglOl`WonSk`QnfWg`Uk`Ui`MgYDgMD]IB]KDQK?YF5UI:QF8Q?5SIBUF3M?5OK=OB8M?8OD5MB=Q=5OD8MD?I?5OF8MI=OD5UI?QI?MI?QK:QMDUK?UOI]MDYUI_UF`[Q_]Q`_SfkYdg[kbQnkSkkSkqYqrYnrSqkMliKi]FdSFbU?`UK`S?_SF_I?YQ=]S?[QFYK?]F:YK:[DBUK:YM?SK=WO=YM?YI?UM=UQ?YK:WO8WMBSIDUQB[YFWSFU]O[]M[fIY]K`YM`gWdk_bu_i{`luborYqn[ikUoiWfiSf`KbYD`W?]UIYQF[OFYQ?WSDYKDYO=QO?YM8QF8UI=QI:UKDQF?SI?UKBSIBUI:WK?SO?SM=SQ=WQBWKBYS?YYD]QKWYI_`I_[I`]Of`K`YQfdK``Q`[Mb`QgfQffQidOggSgfQdbMl]MbdMb`DdYI_QB`SB]QF[ODUI:[K?[Q?]I8[D=UIDWI=WODUMBWO?YK?UMFYQ?YM?[QB[YB]OBbUD`UD`YOb`Qfi_nu]rtWtnYt~n¤ §¥«§²¬®®«²²±·¥µ¼£¸½¥»¼¤¾½¡½¿¥¸½¤½¾¥½½§»¿£¾½¥½¾¦¿¾£¾¼¡¾½§¼»¤¾¾¢¿½¤¾»£»½§½»¤½À¥½¿¥½¾¥»À¤»º¢»¾¡»¾¤»½£»¿¤¾¼¥¹¾£¼½¦»½¥»½¤½»¥»¼¥¼¼¤»½¥¾À£¼¿¤¼À¤ÁÀ¥¿¾¦½½¤½À¦½¾¥¹À¤¿Á©¾¾ª»¿¢¼½©¾¿¦½½§¿¾¦¾À§¾¾§½¼¦½¿¦½½§¾À¤»¾¤¾Á§½Á¤À¿¤»¿¦»»¤»¾§¾¾§Á¼¥½¿§»¼¨¼½¥¼¾§¿¾¤¾Á©ÀÀ¥º¾¦¿¼¤½¾¨¼Ã¦¼¾¨Á¼¥¹À©¾½¦½¾¦»Á©½½¦¾À¥¼À£»½§º¿§¾¾¦º¼¥¼¼¨»À§»¿§À»¦»¾¦»¾¥½¾£¹½¥»½£¸¾¤º¿¥º½¡¸º¡»½§¼»£½»¡¹¼£ºº¨»½¡»¾¦¸½¥¼¼£»º¢¼»¥º½¼¹£½¼¡ºº¢¸¹ º»©¹½·¸º»¥¸»¦¹¸£¸»¢¸»§º»£·¹¢¸¼¡º· ·¸¤·»¥¸»¡¸¹¢»»¥¹º¤¹»¤¹»¥µ½¦¶¹¢¹¼¡¸º¦¶¹¥»¼¢º···¤·»»¹¶¸¸¸¤¹¹§¹¸¢º¹¢µº¢»¼¡»¸£·· ¸º¡¸»·½£·»¢··¥¹À¥·¸¤»¹¼º¢¹»£¹º¡¸·¥·¹ ¸½¦º»£¹¹ ¹¸¡¶·¡µ·³·¸µ¡¶· ··¢¶¶¢¶·µµ¡¶³µ·´³³¸·¶µ²¡·³´³ ´·³µ ³¸¡µ·µ³²¶ ´¶³µ·°£³²µ³³¶¸¶¡±²µ³²µ±µ³³±²³²´³³²²³µ³®²³¶²°³³±³®°³² °´±±µ³­°®±²¯¬°±¬³²²­°¬²¯¬³±®°®¯²¯°° £¤ §¡ £¤£ ¥¤¢  ¦¥¢¤¡¤¥¢¦¡ ¦¨ ¨¢¡¤¨¦¤¥ ¦¡¦£¥§¦ § £§¦£¥¨©£©£«£¤¤§£§¤¡ª¢¨¤¦¡¦§©¡¦§ ¨¬¢¦¢¤£«£§£¦¥¨¢¦¥¬¤­£¨¥«¢¨¥©¤©¦¬¦¬¥¨¥¬¥¨¥¬¥¬¥­§¬§¨¨¯¦ª¤¬¦ª¦«§®§­§¬¨¬ª«©°§¬©®¨¯§­¥¬§¯¨¯£¬¬¯§®¨¯¥­ª®¨³§¬©±¬­¨¯¦­©®§±¬¯§¯§®«­¬°©°«­«°¨±­±«³¬±­³®³ª³©±¯²ª²¬³¬²¬³¬®¬°«³­´ª²¯±®²®²«²¬°ª¯¯´®³­³³µ®¶²³®¯¯µµ´°³®¸­µ¯³°µ±´²´²µ®³°³®¶¯µ³´±³¯µ±³±´¬·¯¸³·°¸°·³´³¸³·³ µ³·³¶²³°¸µµ±´£¬§ ~qq`bU|i[ugUrfYtk`ul[wf[td]n`Yt_WlWSkOKfOFbKF[SM[MI`ID_OFYKK[FB]MF`IISI?YIKSDD]FB]KB[IF`B?_?B[IFWBD[KDUFF[DBbFD_IFUOIYOD_WMbUKbQKfSS`QOg[Sd_SgdWldYnnfoo]rq[ti[rk`oo`qofrqftg]ukWriYq[QnfMo`Qk]Mn[OiUOdSObUMf[M`[MkUKdYIdKKbKDbQO]OM`SKfOOfSK_SMfQM`QKbSK`QMbSM`OU_]Of_Ud]Wf[[gk]kgSkb[nd[iidowlnirxlziz{gtobuk`wl]nk[qbQnYUg[QdSSb[QgYQ`SKfSOb[K[UKdQB[OK]KK_MD`SFYOMbKI_MKUMFbOI`OF[MKdQI[OM_QO`UMdWMbUKbUQbYOgYSfYMd[Ki_YgYUkbWdiWibQnb[id]nbUn`Ui[YgWQk[Sl`YldYk]Uk[Wk]Qk[OfUQiWSbUKiMDgUKbIIbKK`IKbKI_OFgOK[MK`OF`QMbQK`QBfYO_QIdYOg[Q`SMkUSnbYlb]rqdt|gzg]lb|q£¢¡¤§¨¬¬­®µ³°·¨³³¡³¾¨¾¾«½¼¦¿À©¿¿ªÃÁ«Â¿ª¾½¨ÀÁ©ÁÀ¬ÁÁ¬À½ªÃÁ¨ÂÁ¨À¿¨À¾«ÃÃ¬Â¿ªÃ¼©Â¿«ÁÁ¬Ã¾«ÃÀ¨ÂÂ¨ÁÀªÁ¾ªÁ¼©ÂÃ«Á¿§Á¼¨Á¾¨À¾ª¿¾ªÁ½©¿½¬Â¾¨Á¾ª¿¾¥Á¿©ÁÀ§ÀÂ¬ÂÁ«Ã¾ªÁÁ§ÂÃ¨ÂÃ©ÁÁªÃÃ«ÁÀªÁÀ¨Â½«¿Á©Â¿«ÁÂ«ÂÀ©ÃÀ©Ã¾¨ÁÁ­ÀÁ¬ÁÁ¬ÅÁ¬ÀÃ¬ÃÂ«ÃÁ©Â¿ªÃ¾©ÁÀª¿½ªÁÀ¨ÁÆªÁÂ¬Á¾ªÁ¿¬À¾¬Â¿©ÁÀ¬ÁÁªÃ¿©ÃÀ¬ÂÁ¬Â¿ªÂÂ¬Á¿¬Å¿¬ÁÁ¬ÂÁ¬Á¿«Á¾«¿Ã¬Á½¥À¾¬Á¿«½¾§ÃÀ¬ÀÀªÁÀªÁÂ¬ÃÁ«¾Â¨¿½¥½Àª¿À«¾¼¨¿Áª¿À¨ÂÀ©Â¼«À¼§¿¼¨¾½¦¿¾©¾¾©À¿¨¿¼«Â»§»Á¦À¿©½¼§Á»§¾½¤¼¾©¾¾¨¾»¬¿¼¦¾¾¨ÁÁ¬Á½¨¾º¨ÀÁª¾»¨¾¼¥¿¿¬½»¨¼»§¼»¨¾¾©»¼ª¾½©¿º¥¾»¦¿»ª¿½ª»¼¦·»§»»§·¼©¼º¤¾»¨½º©»¶§¾¾ª»¼¦½¹§»¾¨»»©¾»¥½½§½¾©Áº§¾¾¬½¼¦¾¹¨¿º¤¼¼§¼¼©¾»¬¾¾¨¼»¨½¾ª¿¾¨»¿§Á»¥»º¨¼¿¦¾·¦¾½©¼¼§¾»§¼¼¦½¶¦½¹¤¿º©ºº¦½¶¥»¸¥¹¼¨»·£¹· º·¦¶´£¸¸§º¸¥··¡»·¥·µ¡º¸¡º·¥¹¶©¹·¤¹³¢¶·¥ºµ¦»¸¤¹¶£¸¹¢·µ¤¹·£»¶ ·µ¢¸¶¦¸µ¡¹³ ·¶¥·¸¤·µ¸° ·¶£¸³¦¹¸¢µ³¡¶±¢·²¡¹´¡µ· ³¶¹µ¤·µ´³¢¸µ¶´¡³³·° ³³µ²µ³¡¸± ³±µ²³³³¯·³´´¡¶±´~ ~ ¡ ¡ ¡££¡ ¢£¡¢£¡ £¢¡¢¡¤¦¡¡¡£¢¡¦¤£¤£¡££¡££ ¤¡¡££ §¢¦¡¢¢§¢¤¦ ¤£¨£¡£¨¤§¦¦£¥¡¦£¦£©¡¨£¥¥§¦§¤¦¥§£¨£¥¦ª¨¨¦¥£¨§¬¦¨¥¦¦«¡¬§¨£ª¥§¤©¥ª¨©¦¨¡§¦§¨ª£«§©ª©¦¬§«§¬ª«ª¬©««¬©ª¤¬«ª§¬ª­­¬©ª©«§®«¬«®¨¬ª®ª¬«¬¬¬§­§¬©­¬®¬­¬¬¦¯¬¬«­«¯ª®¬®©­ª¯­­­¬«®¬®¬­¬¯®®®°®®°²­¯«°«±¬®­²®°¬¬­²®³­®®°­±®¬®®­±®²°²°²­®®¯²·®³®°®³°²°²¬­¦«¤xz~nqSdQwgQkkUgbMndWogOqfUkgWngQkgIgWDdM8dI?WI8]I:UM:QI=SB?UF=UQ?UI:UF8WM:QD8SI:SK8QF:ID5OO=QB:QB:QF:QD=Q?8MK8QK8SD5WK?SK=WK:[ODWSIYS?[SB]WF`]F`[Md_OdYQg]Mf_QgdSk`QidQgiSiiUigUiiSf_OidQgdOb`KddOd]K`WFbYB_]D]YB_[I`[I][F]WD`YF_M=_Q=YQDWK:YMD[ODUOBWK=YMBSO:WQ=[QBUM?WODYUKU_I`YQ]gO]kSfdQgbSgkY`q[i~dlxinwgrtdtu[qnWkkSnkUddIgYIfdI]_IdYF]YFYWD_Q?YOD[QBUMBYU?UK=YI8UM=WM:UI?WO:[M=UK?YO=WU=UI=YK?YODYO:YS=WUFUS?YUB[Q?]UDYU?_OD[SIYQIdQI_UI]UI_WF`OI_Q=`MB_UFbUF_UQ`_Q`YIgUF`YK]UF_SF_[D[SD]QD_O?UM=YK8WMB_K=UKDYK8WIBSF8`D=SIDWK=YK?UQ?YO?_QDSQ=`WF[SI`]Q``WglWniQniWqn[txt|£¡£¢¥ ¥¡£§°­´®°²©«³²º£·º¥½½¢·»¢»¿¡»½¦»½¦¼½¤¾½¤¾¾¦½¿¥»¼¤¼¾¤½¾£¾½ ¿½¤½»¤¼»¡¾º¡½¾¦¼¾¥¾»¥¾Á¦¾»¡»½ »¾£»¹¥¿¾¥»¿ »¼¤½½£»¼£»¾¡»¾£½»§»½¡½»»¾£½»¥º¾¡½½¤¾¾©¾½¡À¾¤¸¿¥»¾£À¿¥¾¾¥¼½¡¿Á¥¼¾¤½¿¦½½¥»¿§¾¾¨¾¿§»¿¦¼Â©¿¾¦¿¾§À¾¦¾Á¦¾½§½¾¡¾½£»¾¦¼¾¤¾¼¥¾»¥¹À§½¿¥¾¼¥¾¿£¹À¥»Àª¿¾¦¾½¤¼¾¦¾À§»¾¤¾¾¥»¾©½¿§¾»£»Áª¼¾¨Àº¥¹¾¥½¾¤½¼£¸Áª¼»¢º»¤½¾§½¾¥¼»¥»½¥º¼¦¾¼¤»½¦½¾§½¿¤¼½¨¾À£¹¾£¼» »½¤¹º¦½º¢»¾¤»º¥¸¼ ¸¼¢¹º¦»¼¤º¸ »¸ µº£·¹¢¸¾£»¹¢»¹£»º¥»º£·º¥·»£·º¸¸¥¸¸¥¸º ¼¹¢¸»¢··£¸»¢·»¥·¹ »·¡·»£»¸¡¸¹£º¹¤¹· ¹¹£¸½£µº¡µ»¡¸»¤¹¸¢¸¸µ»¡µº¥¶½£¹¼·¾¦¹»£»»¢µ¼£¸¸¢º¼£»»·¼¢¸º¡¶¹ ´·¤µ¸¢»º¤»»£µ· ¸¸¡¸¾£¸»¤¸·¡º»¢µ½¡»·¡·º¦º¸¤¹º£··¡¹¶¶··¸£³¶µ··µ²¶·´¶·±µ³µ³´µµµ³´·µ¶³¶³µ²µµ³¡µ´²¶³¶ ·µ³µ¡¶¶²´³³¶´´³³³´³³µ´¶ ¯·´³³²¯²²²´°³³²®³²²³³°²²³²²°±¯±°±±¯°²®¯¬«±­°¯³¯®³±¯±°®­®¬±°£¢¢¥¢¡¦£¡¢¤¡¡¢¤££§¤£¢ ¢ §¥ ¥ ¤¡¥§¤¤¨ ¦¦¤ ¥¢¦  ¦¨§¡§ «¡¤¦ ¦¤¥¨¢©§ª¢©¡¨¢¥¡©¤¬¡¨¡¨¥©¡ª£ª£«¢ª£© © ¨¥ª¡«¦ª¢¬¦ª£«¦ª£¬¢ª¢«¥¬¡ª¢¬¤¦§¬¥¬£©¨ª¢«©«¦­¢­¬­¥­§¬§®¨¯¨¬¦¬¬®ª­¨¬¨«¨­©¬ª¬§¯¤¯ª¬©­¨­¨­§¬©±­®©®¤°¨±¬±©°¬­«²©±ª°ª²¬¯¬±¬°¨®ª±­²«³¨¯¬³®²¬³¬±«²«°¬±«¯©²«³­³«±¬³¬³¬´­³®³¬±«±­²¬²­²¬²®±©³³³¬´¬³¯³°³­µ±¶­µ®µ°³±³®³¬³¯³­³°³­³¯´®´­³±¶±¶±µ±´³¶µ¶¯·°³²µ²·°¹µ¶³·¯·¬¹¯¶¬³±¢ ~wxbg[d`zn[tn[wl_wk`ud[ri]rl`r`Qo[UoWMbKIfKO]OIfQDUID`DK[OI`QK`QK`MD[IM`MF_DB]KF]OI[MKSOIYWIbMD_FB]MI_KI_FB[KF[OI]KDbSF[KF`ODfQIdOO`QObUSf]Of]Ml_SniSo_Yo`Qk_[lYOqWSk_Wi][ob]qi`nf[n[So`Ul`Wi_Ulb[k[Ok[Ul[Oi[Sk]Ik[Sk_QdSQi[SgYQfUOi[M`_O`UIfYOdSK`UKdSIfQM_SKbOOf]MbSQbWFiQUbYSdYOl[[i]Yi`[lk_ob]nkbozkuotnxtxiz|f|k]{n[lb[od[igYnd[n`Sg]Sk[QfUDdSObOI`QK_QK`SMbMDbMFd[K`UFbSI_UMYQI_QFbSM`MDbQFbSM`QKdOIbUObWKdSOfQMdUOfWKbSKdSF_UKg[KgQMdQMfSIgOMdODkQKg[SiWOgUQdYSfSSkSMiUUgMKkQOfUSdSOdMMbMMbMF`OIdQK`WF`OK_MKbQK`MD_IIbFO`KDbOMbWKfUKdOK_YMf_OiQQd_Sb_Yld_uk_wifuobzwu||­¢¨ª¡©¨ª£©¬±¶£²¶¶°µ¬³¶§·»¦º¾§¼¼¤Á¼¨Á½¨ÂÀªÄ¿©ÃÁªÃÁ¬ÀÁ¬ÁÁ¨Â¿©ÀÁ¦À½§ÃÀªÀ¿§Á¿¦Ä½­Á¿©¿Á¬Á¿¬ÁÁ¦Á¼¦ÃÀ©Á¾¨¿½«ÁÃªÃÃ¬Á¾§Â»©ÁÀªÂ¿«À½ªÀ¾©¾»¬À¾¨ÃÁ«Â»¬Á¿¦Á¾¬ÁÁ«Â¾¨ÀÀ§ÁÁ¬Ã»¨ÇÁ«ÁÁ­ÄÁ¬Ã¾©ÁÁ§ÀÀ«ÄÁ¬ÃÀ®Á¿«ÄÁªÁÃ¬Á¿§¾Â«ÀÀ¬ÄÁ¬Â¾ªÁÂ«À½¬Ã¾¬ÁÂªÁÀ¬ÂÁ¬Â¿¦ÁÃ¬ÃÁ¦ÃÀ­ÂÃ¬ÃÀ©Å¿­ÄÀªÃÁªÁ¼¬ÁÁ¨ÁÂ¬ÂÂ¨¾Á«ÂÁ¬ÀÂ¨ÁÁ­Â¾«À½¨ÁÃ¬Á¿¬À»¦Á»«Á¾©Á¿§Â¿©À¾ª½¾¬ÁÀ¨ÀÀ¥¿¾©ÁÁ§À¿¬¿¾ª¿À¬ÁÁª¾¼¨ÁÀ§À¾©»¾ªÀ¹©¾¾§¾¼ª»¾¨¾¾¬Á¼§¾¸¨»¾¦¾½ª¼¾¥Á½§½¾ª¼ºª»¼§¼½ªÀ»ª½À©½¹¥¾¹ ¾¾§½¼¨º»¦¾½ª¾Áª¿¼¬½»¤»»¦»¾©À¹¨¿»¥½¸¤¾¼¦¼¹©½¹§»º¨¾¼¥»¼«½º¨¾»©¾Áª¿¼¦¿»©¼º¦¾¼©½º¬¾¾§½½ª¼½§¼¾©»»§½»©¼¼¨¾Â©¾º¦¾¼§»¾¨»ºª¾¼©À¼£½¹¨¼»¨»»©¼»¦¿½«¾¾©½½¦¿½«»¼§¿»¬½»¨¾º¥¹¹¨½³¦¼¹«¶¸¦··¥»¹ªº¹¥»·¡»·£··¤¸¶¢¸·¥¹¶¤·¶£º¶¢º·£¸µ¢»º¡µ·¦¹¶ ··¥»·¤º´§º¸¡»º§»¹£·¶»¶¦¸¸¢¼·¡·¹¤µµ¶µº·¤·´¤·· ¹·¥¶°£·· ¹´¡¶´¤·µµ¶ ·µ£¶µ ·´¡´´ ¶³´°¸³¶³ ´°³´´³¶¯ ¶³´³³°·±¡µ²°®³³·³¶|~¡¡ ¡¡¡£ ¢£ ¡¡£¡ ¡¡¢£¡¤¡ ¡ £¤£¡¡¡¥ £ ¡¢£¤¡¥¢£££ ¢¦££§¡¡¡£¡ª§¤¡£¡¥¥£¥¢¦£¥¦¦¡¤¡§£¥¨¥©¥¤¨§¨¤«£££¤§¨§¦¡§¢¦£¨¥§£¨§§¨§©¨¦¨§¨¨©§©¨§§©¤¬§§§©¥ª§ª©§£¨©§¨¬¨ª¦©¨«¤¬©©¦«¨°§¬§©«¬§«¥¬©¬«¬¨®§««¬¬¬§®¨¬«¬¬­©ª«®©­¨«©­«¬¬¬®­¨­®®¬¬©®«¬¬¯«®¬²­°¬¬¬®­®­¬«°¬®®¬°°­°­±¬­­­«¬­±ª¯°³­­°®­¯®¯®°¬­µ³°°°¯±¯®°¯²®¯±°²´°¬¯³±µ­®¨¦tfkS`KtdUniWkgUqdQqkWobQniWnfSdWIkQ?dQ?UD?YI5YF?SO=YF=UO?QO:UF=YI?SD:SI8QI:SD?UI:QK?SI=UM?UF=YF5QD:WD:SK?QI:YK:SI?QO=YO?UOBYM=YOBYK?UQD]UB`UKYWM_bQdgYinQndMfbFdYFi[DgYFdYOb]OdYKbYM`]MdYIfUD`WI`UIbUF[UD[M?YUDYUF]W?]SF]WD]SB`UDYQD]O?]UIYWFWUD]Q:[UBYSB`U?WSDWM?WUDYUBWWD`SBS[M_WF`[Mb`S`fOfkOdoSgqYkr`k|gnltnzgw_wl[wnSlgWgqQkoYitQddOkYKdbF][I`W?]QFWO?YM=YUDUM?UO8UQFWQB[M5WKDYK:WI?YO8UQBYQ?]Q8UMF]O?WI:[Q?UI8WI?[O?WM8SOBYO=[K?YKDUI=WS?YQ?YUBYSF_QDd[D_YKYYD]YF`WD`Y?dQ?_S?`K?]OB]S?WI?_M?YO?YF=[I?SIDUO=WI?SM?WIDWK?]MBSO:UF8YMBYQFYO=WQBWUB_Q:`YK`YQd_SifQidYgfYno[rziw{¬¤«§¤§¢¥¢¤¬¬·¯µ±­¯¬¯·¢²¶¶»¢¹¾ º¼£½¿£¾¼¥¼¾¡»» ½½¢ºº¢¿¾¥½»£º»¡»¾£»½¤½½¡¾¾¦¾¾¥¼¿¤½½§¾¾¤¼¾¦»½¤¾À¥»À¦»½£¾¾£»¾£»¹¢¼»¤»¼¤¾À¤¼¾¡»»¢»½¥¾»¥¾¾£¼¼¨¼¿¡»¾¢½¾¤¾¾£¾Á¤¼¼£¾¿¤¾¿¤½¾¢¾¾¦Á¾§½¿¤½¾¥ÁÁ¨½¾¤À½£¾¾¤½¾¨½¿¤¼½¦½¾§¿Á£¾¾£½¿¨¾¾§¾¾§¾½¨½¾¦½½¥ÀÁ§½Á¥½¾¥¾¿¦¾¿§º¾¤½¾¦¾¾¤¾Â¦¾½¦½¾¦»¿¥¿¿¦½¿¤»»¤¾¿¥¾»¡½¾¢¾¾¨¼¿£½½¥º»¢¼»¦¼¾§½·£¾¿¨¸¼¥»½¥¼¾¤»½¦À¾¥½¼¡¾¾©¾½¦½¿£»¾£º½£¾»£¹»¢µ¾ ¸º¤º¼£¸º£¾»¡¹½§»»£¸»¤º¸¤¸½£·»¥¹¼¡¸º¡¼¹¡½½¦·»¢·»º¼£½¸¡¸»»·¤¸»¥¾¾¢¸»£½º£¸º¡º¼¡¹¼£¼·¤¹»¢»¹·¹¢¸·¢¹¸¢¸º£½¹¡¸»¢·¾ »º¡¶»¦¹º£¸»¤¼º£¸»¥·º¡·»¡¹¸¤»»¤¹º¡º¹¥»·¡·»¢»½£·»¡º¸¼»§¸¸¡´»¡¹¸¢¸¸¢¹¶¤¹º§·º¡¸¸¡»¸£¸»£º·¡¹· ¸· ·¹£¶¶µ··µ ¸··»¢·³´· µ· µ³¡µ´¸µ¶µ··³·¡²²¶´³·´µ°³·µ ´¶·³´³µ·¡³³³³µµ£·´³³³´²³°µµ²°´²³²µ²³³² ±µ°°´²³´´²±²±²°±±°²µ²³°±²®°±®¯±®²°²±°¯¯¯¯­±°¯¯®®¯¯°°«¢ ££¦¢¤¡¢£¡¢£¤¥¡¤ ¢¤§¥¥¤§¦¥¥§¦ ¤¢©©¤ §©£§¥ ¦ ¦¢§¦ ¤ª¡¦ ¥¢¤¢­ ¥§ © §£ª ª¡¨¨¤©¦¡¥¤«¡§¡¥¦¨£«¥¬¡ª£¨¨«¤ª¤¨¡¨£¬¢®¦­¢ª¨¬§ª£§£¬¤¬¨¬¤©¦°¦®¤®¦¬§­£®§¬¤©¥¬¤¬©¬¨¬§®¦®¨®§°¦®«­©¬¥¬§¬¤­¨­¥¬¨°©¯ª¬©®©¯©­¨®©±ª¯©±¬®¦¯¬®ª­­¬«®¨±¬®«®¨¯¬®«°­³¦³¬°«°«³«°¬µ¬³­¯¬²¬µ¬²©±§°¬¯®·¬³°±¬¶¬³¬°¬°¬±¬´­³¬³¯µ®±­²®´±³¬µ¯´­³°´¬³°µ¬³¯³°²­¶­¶°³±¶¬¶¯·°·°´­´±³´·°´³·¯´²¶°¸³¶µ¹²³®·®³¥¬¬¢§  txglW`Qz_YokYlbbwoYuobxn]tk]rgWqUKrOIiKI`MKbMFbKK]MIfQM`SObSKbOK`KB[MF[MF`IK]MM`QK[OF]MB_FK_KF]MI_I?`MD]KK]DBbKK_OO_SI`UQgYKb[MdWMdYK`WMk_Qi`Uf]Wl`Ykk`rzdtoYwfQnbWtWQr[UnWWi`Qg_Ql]SkSOlSMkOKiSMiUMgSKbSOdUM]SOdQOgSM`WKfUKfQKbUM]SSfSI`[KdSKfUOiWKb[Q_UMkSK`SFiSMdSKbUOdWMbUKgYWfYSk]Si`[kg_of]nqintkuxnwqtz{xw~nzi||btqfxugurfww`qf[ugQrfUo]Mo[QfWUgSK`QFdWOdWM`WIbQQ`SK`MBbQI`SIbSIdQK_OF_UI`OKbKKdOK`UFbSI`IF`QO`QO]MIbQK_OK`S?dII`OK`UO_SKfUOd[O`WKi[Of[Wb[WidSg[Sf]Sl]Qg`Si]Kk[MfWIfMMdQKiSKfQFiQ?]OI_MDbKI_IB]KM`KIbMF_QI_MI_MObKO`OIdSMbUOgUKgUSi_[g_Uob`on`qf]rtkwl{r¨ µ­«­£¬¢¨¨¬º¡²·£´±º­·³´·¥»»ª»Á©½¿¤Á¿§¾¿¬Á¿§Ã¾¦¾À©ÃÀªÁ¾¨Ã¿¦ÁÀ¨Á¾¨¾Á§Á½¨Á¿©Ã¿¨ÁÀ«Â¼¬ÀÃ©Á¿¬Â¾¨ÁÀ¨Á½¥¿¿§¾»©Á¾¥¿¾¤Á¾©¿¾©Ã¾§¼½¨¿¿¬¾¿§Á½ª¿Á¨Á¾«ÂÁ©ÆÁªÁÀªÅÃ©ÃÀ®¾À¬ÁÁ©ÁÃ¬ÀÀ«ÂÀ¨ÅÁ©½À­¾Â¬ÅÁ¨¿À¬ÁÁ¬ÄÃ¬ÂÀ«Á¿§¿Á©ÂÁ©ÂÁªÅÁ¬ÃÂªÁÁªÃ¼ªÃ¾©ÂÂ­Â¾¬ÃÁ©ÁÁ¬ÁÁ¬ÁÀªÄÁ¬ÃÁ©ÁÁ¬ÂÀ¬Ä¿«ÃÁ­¾Á¬Á¿­ÂÁ¬ÂÁ«Á¿¬ÁÂ­Á¾ªÁ½ªÁÀª¾¿ªÃÁ¬Â¼§¾¿ª¿¾¬À¾ªÁÁª¿¾¨Â½©ÀÁ®Á»©À¾«¿Á¦Á»¨Áº©»¿¤¾¾®Á¾¦Á½«À¿¦¿º¦¿¿ª¾½¨¼½ªÄ½©À»¦¾½¦¿»¦Á¼¥»½¦¾¼§¿¼©¼¼©À¼¨¾¼¦½¼§¾¾§¾º¦½¼§¾¼¦ÁÀ§½¼ªÁ½¨¿¾¦Á¼¬½¿¨¾¾¥¾»ª¿º¥¾½¦¾¿§»¼§¿»¨»¾¨¾½§¾¾§½¾§½¼§À»¦¾¾«¾Á¬¾¹¨¾¿§»½ª¾»§¾¼¨»¼¨½À¨ººª½»©»»¨À¾©½»­¼¼§À½£Á¾¬À¹¤»º¬¾¾¦½¿¥¿¸¬Á»¬¼½¦»¼¨¼½§¾¹¤»º¤»¼¨¹¼¤»·¨¼·£·ºª¼¹¢º¹¨·»¤»·¡·¸¥¹º µ³¥»¹¤º¶¡¶¸¦º¶¦º·¥¹¶¥¼¹§º¹¥¶µ¢»¶¥¹µ¦·³£¹·¤»¶¢··¥¸µ¦·´§¸¸¡»··²¤¹¶¦¹¶£»µ¡º³¡´³¥¹µ£µµ¥·³¡»·¡·µ¡³³º³µµ¢¹µ¡¸¶ ·² ³³¦¶´¡¸³¢·° ³¶¸³³±±³µ¯¡´µ¢·¶¶¬£²³¢µ° ´±¶­¤±µ³°¶³¡²¡ ¥    ¢ ¢ ¡  ¢£¡¢¤¡¡¢§ ¡¡£¢¢¥¢ ¢¥¤£ ¦¢¡¢¤¡£ £¢¢££¢¥§§£¢¡§ ¡££¡¨£¢¤¦¢¦¤£¦§£§¢£¦¨£¥§¥¤££¤¢¦¥¨£¦£¨¥¤¥©£¦§©¦¦¥¨¥©¥§¥§¥§©§£¤¨¨©§£©¦¯©©¨««ª©¨¦­¥ªª©§ª§©§ª©ª§¬§©«¨§«ª¬©¬©¬ª­ª©¨­ª¬««©©©©¬¬«¯©«ª¬¬­¬®ª©¬®¨­©­¬®­®««¨ªª®®««¬­¬«¬®­­­¬¬«¬­­«¬«®©¯«¯­¯¬¬©«¬¯®°«°¬°¬³®­­­­®­²°°­±®®±®¯²¬±­°²®²²­®¯«¦« «¡{t_`K_Kq]KkYKb_UkgUikWroWklSrfMgWDdOB`I:[O=WK:UK=UKBWWBWOBSM:WI=QF8SF?QK?UF=UI=WO=SI?SD?UI8QD5WD5SI3QI=QD:QI?QI?YK?UM?UOFWK?YUD]SFYUDbSD]]I]UK]_I_dM`dQff[dk]gkUkkOlgOi`IgWFbUIbYM`YIfYId`D`UF`S=YQ?[O?YU?[O=YF=]K?UQ?[KDWK?WODUMDWQFYQBWS?SM?]WDYQF[K5UWDYUFWY?[UD]UB[YD`W?]WFYUF`YIY_I]YI`gQddQbfQggSfgWfiYnokn|gtnxnxfxz`xr`rt_ot[qtYnoYqoYgkSgdOkbKb]OdSD]YF`UB[Q?YWKWQ?[Q?]SDYQ:YQD[U?UQ?YI=WU?UQBUO:UQDYQBWK=UO?UK8YQ:WIDYI=SO=YM=UM:UI?YQ:UM=UKBWMBWMFUQF[QFYYOW_I[`F_]S_dM`]M`iM_fI__IdYD_UBdYB[MI`K?YM=[O?YM?WF:WI?SI:WIBYI8SMBQK?SI=[K?UQ?YI?[QIWUD[Q?_SKW[S`]M``UkgQf`Yiufun|qª°¦¡§¡¡±¬·­³²­¯±¯´··µ¾ ¸½£¹¼¤¾»£»¿¢»¾£»½§»¾¡»¼¦½¾¢»½¡º¾¡¾»¡º½«¾»¤½»£¼¾£¼½¦À½¤¾¼¦»¿¥½¼¢»¾¤¾¼¦½½£»»¦¼½¤¼º¼»§¼½§»½¡»½£¹¾¥½¿¥¾½¤¼»¨»¾¦¾¾¦¼Àª»½¨¿¿¥¾¾§¾¾¤½¾¦¼½§º¿©¾¾¢¾Á©¾¾¤¼¾¤¾¾¥º¾¦»¼¡ºÁ§»¾¤º¾¥º¼¦¾¾§¼½¥»¾¢¼À¥¹¾¡½¿¥¼¿¨½½¥¾À¦»¿©¼À¤»¾¥ºÁ¨¼¾§¾Á«»¾§»½¥¼¼£½¾¦½¾¥¼¾¤ÀÀ¥¼¾§¾¼¦¼¿¦½¾ª»Á¤½¼¤½À©½½§¾¼¦»¾¥½»£¾½£»½¦¸¸¡»½¦»½¤¹¼¡¶¹§»¾¡»¼£¹»¦»»¤¸½¤¸»»¼¢º»¥º»¢¾»¥»»¦»½¡¹»¦¸»¡µ¸¢»¹£¹½¥¸¼¢»¾¥·º£º»£¼¹º»¥¸»£¾»¼»£¼º¦»»¢¸¼¥»º¤¸¹¦¶¹¥»½£»» »»¦½¸£·¸¸»¤º»£º·¡»»£»º£·º»·£¶¸¤»½¢¹»£¶º§·»£»»£µ¸¦·»£·¾§º»¥¹¸¥º¼¥º»£¸¼£»»¤¸¸ ·»¦·»¢¸¹¤»»¢·»¥¹º¢¹¹¡··£·¹¥·¸¡·¶¡··¶¹¤µ··¶ µ·¡µ¸·¸µ· ·º¶¸¡¹·¶º¡µ³·¶µ·¶·³·³¶³·µ´µ³³·³¶´´³´³µ µ·°·³³¡´·¡µµ²³µµ¢³³´³³²°³°´¢±³³µ±²³±²³³²µ³±²°± ´²³³²®³²¯´°°²²´³±®¯²±±¯®¯­°±°°±¬°°¯®¬²°®­±±®¬°¯   ¡¢¡ £¤¤£ ¤££   ¢¤ ¡¡ ¥¡£ ¥¦¤¤ £ §¤ ¥¢¡¤¢¥ £¡¦¡£§¡§¡§¥ § «¢§££¤¨¢¦¢ª¡¨¥¥©£¨£©£¤£¦¡¬¡¨¤ª¡«£¦¢¨¡ª¥©¥¨£«¤¨¦«¥¨¥§¦¨¥¬ ­¢©ª«¦«§¨¦ª¤«£¨¨¬¦¬¦§©­¤©§ªªª¥°¨¬£¬ª®§¬ª«¦¬¤­§ª©«¤°¨¬©­¥©¦¬ª²ª®§¬¬¯ª±©®ª®§®ª±¬­©®¨­¬¬©°¬®¬¬«¯¬±¬¬¬¯«¯©¬ª²«°­®¬°ª°¬³®²«³°®­®¯³«¶­³­µ¬±­³®²¬°¬³±´¬³¬¯®´­²¬°®³®³­¯¯¯®®³³±´®²®°±³¯·²±­³°°±²°³¬´¯µ±²¯±¯°±´²³®´¯¶±³±¡³³³¯³µµ³²±±²´¯³°³¥±¡¨¤¢¦rr_bU{`UnSWr][id`klbnndtqdql_u_SlSOdKO`KK_MM]UO]SMbQQbSKbQMdSKbMO`QObMO[QK[OK_SK_MK]KM]MMdSK_QOYSM[WK[QM[OK[MKWSO_SO]OObQO[SKdKO[UQb_SiQQf]UiUUd`[g`[ibWofYkkbnf`qk]nqbul]qkYqfUo`Sg[QlUWg_QkSUk]Mi`QgYObSQfSObMIbQK`SO`QO_UK`QQ]QI[OMbSK]SKbSM`YM_QS]OKb[Q_WS`YOd_[f]Yi_SkdOg`[f[Wgf[fbWid]kodkq`kxfrfrbqxfuxiw{trzruo{~l{rk~nixudw|ku{bz~kw~kww_xo`qkWqbYodUl_Si]Ul`Wd_W`]O`WO`[QbYK`WQb[O_QQdOO_WM_QU]UK`YQ`WK[DMbUO`QK_SM`QM_OM_UMdWObSK`OO`SK_QM[MK]SK`OQ[MM]SO_SU[SQ_SQdU[__Wd[Ulb_f[Yg_WkdYgbUk_Sd`OfYO`OIf[SbSObQIbOM_OD]SIbKI_QM[MK]OF`KK]IO_MMbQQ_UQdSKfWS__[k`Uk`[kg_kf[roou|wz²¡§³¯ ©©¢¦´¤°º©·¹µ±¡³·¤»»§»»§º¾¤»¼§¾À©ÀÀ©À¾¬Â¾¨¿¿¨¿¼«À¿©Á¾¬Á¿ª¿¿¨¾¾¬¾½§ÃÁª¿Á¯¾¿­ÃÁ¬ÀÁ®Ã¾­ÂÀª¿¿ª¼À©Â¾ªÀ¿ª¾¾ªÀ»©¾ÁªÀ¾¨ÃÀ¦ÁÀ­¾Â¬¿½ªÁ¾©ÄÀ¨¾¿¬ÂÀ¯¿À¯ÁÁ°ÃÃ­ÅÂ¬ÁÁ¬ÃÁ¬ÀÂ°ÁÁ®ÁÁ©ÀÁ­ÁÄ¬¿¿«¿Á®ÀÁª¿Ã«ÃÁ©À¿©ÀÁ«ÁÃ­ÀÁ®ÁÀ«¿ÀªÃÃ«ÁÂªÁ½¬ÂÂ®¿¿¬ÃÂ¬ÁÁ®ÁÂ­ÄÁ°ÄÀ®¿¿®ÁÁ¬ÄÃ¬¿¿®ÁÀ«ÀÁ¬¿Ã¬Ã¿®¿Á­ÀÁªÂ¿¬Á¿¬¿¾­¿Á­ÀÀ«Á¿¯Á½§ÂÁª¾À©¿¾¨¿¿¬À¾¬»¿©Á½¬¾¿ª½»¨¼»«¾»ª½»¥¼¾«¿¾¬Â¿¬¾»©½¿©Ã½¬¼½¨¿¾©¿¾ªÁ¾©À½ª¾À¬¾¿ª¿¿©½Á¨½¾©Á¾ªÀ¼¬½»ª¿º©¼¿¨»¾«À»ªÀ½¬½¾ª¾Àª¿»§Á¼¨¿º­¼½©½½©Á¼«¿¼ª¾½§¼»©¼¼§¿º¬¾½«Á¼¨»»¬¾»¬ÀÁ¦½»¬¾»¨»¼¨¿¾¬»»«¿»¨¹¾¬¾¾§¼¹©½º«½¾©½½©½¾¬»½©¾¿«¿¹¬À½«½º©½»«¼¾©»»§¾»©»»¦¼»§»»ª»º¤¹·ª¾»§»·©·¹©º¹¦¼½©»¸¦¹¸¦¸º¨»·©¸º§¹¸¤·»§»»¨º¹¦¸¹£¹¶¤»´¦µ·¨º·£¸¶£º¸¤µ·¤»·¥··¦¶¶£º·¤¹·¥¹¶¥·¹¦»·§··¤º³£··¥·¹¢·´¡··¥··¦·±£¹º¥··¤»¸§¶»¤´µ¢¹´¡¶¶£»¸¥¶´¤¹¶¥³²¥¶±¸³£´µ¢µ³¤µµ ³³ ´²¡±²¡´´¤³±£´³µ´£±µ¤³°¡´´¦³³¦´²µ³³³¤¶°´³³    £¡       ¡££¢¡¡¡¢£¢¡ ¤£ ¢£¡ ¤¢¡¢¡¡¡ £¡¢¤¡£§¦ ¤¤¡¦ £¢¤¢¦¥¥¥¦£¢¦£¥¤¥¥©£££¦£¥¡¨¤¥¦¥¢ª¥¦§¤¡¨§¥¦¦¢ª§§¦§¥¨¨¦£¦§§¦©¤§¦©¥§§§¢§¥¨«©¦©§©©©¥©§©¥§¨¨¨¬§©¨¥©­«¬§¨¥«©««¬¦¬¨¬¬««ª¨¬©ª««©©©¬©¬¨«ª¬«¬«¬­¬¬¬¨­©«¬¯¬ªª««®ª­¨®ª§«®«®¬¯«¬ª«¯¬®­¬­¬«­¯«±¬««¬­¬¬¬«®¬­®­­¬©°¬­°­¬«®¬®°¯®°®¯«¯±°¯¯°®±¯°¯«®¯¨­¤«¤¢¢t`nO{WIkSI_WF`]MgfSbk[dgUibQg]MdO?dM?]FBUO?WM?YQFUUBYS?UQBWK?YI=SQ?US?QI:WI=UOBUM?QQ?SQ?QWBQID]QBUM?YIDYO?UK:[I?UUISSDYS:WYDYYBWO?YKBYOB]QB[UI_YI]WFbYF_`Mb]QidSfnUinUknYloOdnQllMndMgYIgWDfYI_YBb`D_`IbYDbW?]Q?_S?YI8YM=SM:WM?YMBQQ?UM:YK5WQFUMB]K?OS?]Q?UO?WWFYYI[[F_bI]]D]YKYdQ]`IYbM_`O[[O_`Sdg_`n]iw`lzbqzbtfudtdtgwb{_zqUqq`qwbqz_q`qgtu]rrSntUigMi`KbgOd`K``F_WK`UDYWF[UFYUDUQ?WQDYS?WO:SKBSMFWSD]M?SQ?SQBUM=UKBQQ:WK?UM?QIBSM:WKBSO?UI=UI=UK=KD8UI?UK:SF=SI?WI:QF=U??SQDSM=UQDYODUQI]WI`_M]]Qb]K`]I]YI_UBYSDSQBYM=WM=SK?WF=YI=SI=UF=UF:UM?YD:UO?QM?YY?]MI_UIY]K_]ObfOg`UkgWl{uxrlo®£©¡{ ¡ª¥»¢¯¸³´·±±·¶»¶»¡¸»¢»¼¤·½¡¼»¡¼¾¥»»£¹¾¨»»£¼»¥º¾¥»¾¢º¿£À¾¡º»¦¾»¤¼¾£»½¤¾¼¢¸¼§¼½¤»½¤º½¥»¹¥º¾¥½½»¹¥º¾»½¨½½£¹½¡»»¥¸¾¥½½¤½¾¦»½¤¼¾£¾¾§º¿¦¾¾§¾Á¨»¾¨À¾¡»¾¥Á¿£½¾º¾¥»¾§»¾£»¾¨¾¿£¼Á¥½¾¡¾½«½Á§½¾¤»½¥¹¾§¼¿§½Á§¾¿¦¾À§»Á¦½½¥¼Á¨¿Ã£¹½©¿¾¤½»§¸¾¤»½¥»¾¥¾Á£»½£¾¾§À¾¥»¾¨»Á¤¾À§»¾¢º¿§½¿¤¼¼¦¾¼£¸À¦¹¾§¹¸£»¼¡º½¡½½§»»¦¸¼£½»£»¼¤¶¾¢¹·¡»½¤º»£»»£¹¹¥·¾§·»¥·»¹»£»º¥¼»£º»¦·¼¢¸¹£»º£ºº¥º½£º½¥»¾§º»¡ºº£·»¤»¾¢ºº£º¼¤»»£¾½¡·¹£¶» ½¼£¾»¡»»¢º»¢¸¾¦»¼¥»¹ ¶·£¼º¢·º£»»¦¸º·» ·¼¥¹º¤·¹¡¶»£·»¡»·¢¹»¤»¹¡»¹¤º»¡º»·»¡»¸¦¸»£»¹£··£·¸¥·»¥ºº¡ºº¥·¸£µº··¥µ¹¡··£¹¸µ¶²·¡·µ¢¶¸¶µ µ·£´·µ·¡´¶··³µ¶¸³·µ·µ·µ·£¶¹¢³´µ¸ µµ´³¡µ·¡´³¶´³³ ²¸¢²³³²²µ²³µ·£³·³³´¸³µ³²³²²¹¡··´³³³´µ³³µ³³µ³³´³³³°±²´±°³±¯¯°³±°®¯±±°°²³®²¯°±°±²®®²®®±®¯®²¯²°°°³®¯²°²°®¢¢  ¡¦¢¡¡¡¤¡¢¡¤ ¢££¡£¢ ¥ ¢£ ¥¡¢£¥¥¡¡¦ ¢ £¢ ¨¦¢£¡¤£¦£ ©¥£§£¥¥¢¨£¦¡«¤¦¤§© ¡¡©¤¨«¢¥£¨£©¢¬¥©¡¬§©¦«¡¨¥¦¤§¢§§ª¦§¢¬¤© ¨£§§©¦ª¢ª¤«§¬¦­£ª¦«©«¨­¦«¨©¥¬©¨¨«£¬¥¬«®§­§­©«¦¬¨¬§«©¬©­¨¬¥®©¬§ª§®§­«¬©¬ª¯¬¬ª¬¤®©¬©­¬­ª®¬¯¨¯¬­¯®¨¯­­¬°­²¬­«­¬³¬°¨¯®®§³­°«±¬µ®²¬´©¯®°«³¯³¬³¬²«³­±«¶¬²¬°±²­³°²¯¯­´¯°¬´¬³¬´¬±­´®³®³®µ­³¯±¬°°µ° °³³­³±²®³¯³³²®±­´³·¯³°³²²´´°³±³³³±´´¶²®¬¯¨¯¬«¨¬© ¢~oq_bWu[Qn]Wn`]gf[oi`nk`nb[n`Si]WlKFdQK[QK`SK`QQbUObWQb[MbWM`OQbQI`SM_QM]MMbMI[UQbYQ][K`QS_MObKObQQbSF`SO_OS]UK`MO_QO`WQ]MK`US`UQ`_Qd_Kd[SbYQ`YSb]Wi`[gl[lg[o`Unb]gk]kf]tkkuqbrqdqw]zn]qoYriSr_Ul_Qo]Sf[WlWUl_Of[Uf]Of[KdUM`OQbQIfQK]WK`OMbQK_SK]QOdQI_QM_SDdOObWQbWOdUQb]U_[SbWS`]]d[]dnWii_ib[kkYkn`ordqldtuln~nut{ux|~rkxkxkzko~n{k{f~~guq`wlWun[llUoiWg_WkbQi`Qg[Sd[UbWM`YMiUObQO`SO`UObWM`QQ_OQ[MM_KK_MO_KK]IIWSK`OI[KM]OKYUO]OF[OM_OKYKDYOM]IK_KK[FI_KM[MK[KM_QM]QM[MM]SS_US_SOgYS`SSdWWfW[b]Ud_QiYQb[OdQObSM`MSdOO`OM[FO]KK]QF_KM_IObOO`SM`SO`USi[S`UUg`]og[lg[oi_uuxw  ³ª§®¤£§µ¡±»£·¸¤º¶»¶¦»½©¼¾¨¾¾¨»»©¾À©Á¾§ÃÀ©À¿«¿½«¾¿¥À¾¬ÂÂªÀÁ§ÁÁ«¾À¦¿¿¬ÄÂ¬ÁÂ¨Á¾ªÀ½ªÂÃ­Â½ªÁ½©½¿ª¿½©Â¾¬Á»¦½¾¨Á¾§Á¾¬Á¾¯ÀÀ©ÁÁ¬ÃÁ«ÃÁ¬Ã¾¬ÁÁ¬À¾«ÀÀ­ÀÂ¬ÁÁ®ÃÁª¾¿­À¾¨ÁÃ¬ÁÁ­¿À¬ÁÀ®Ã¿ªÁ¾¯ÁÁ­ÁÃªÁÃ®ÁÂ¨ÅÀ«ÁÁ©ÁÀªÁÃ­¿À«ÁÁ¬ÁÃ¯ÁÀ¬ÀÁ­À¿ªÁÁ¬Â¾­ÃÆ¯ÀÁ¯Â¾ªÃÃ®ÀÁ¨ÀÅªÂÀ¬ÁÃ¨¿¾¬ÁÂ¬ÂÁ®Â¿­ÁÀ¬¾Â«¾¿«ÄÁ¯ÁÁ­Â¿¨¿¼«¿Á¬¾¾«Á¾­Á¾¬Ã¿©ÁÁ¬ÁÀ«Á½ªÁ¾®Á¾¬½¿¬½½©Á¼§¾¼¨¾¿ªÁÁªÁ¿®»¼«Á¾¨¾¾¦Á½ªÃ¿®¿Á­»¾¬¾¿ªÀ¾¨¼¿¨Á»¬À¾¬¾»¬¾º¥À¾©¾¼ªÀ¿¨¾¾¨½¿¬À½¬¾¾©¾¾ª½»¨Á½¬¾¾ª¾¿§¼¿ª¹»¬¾½«À»¨¾¼¬Á¿§¾¾§º¼¬¿¼¬½»¨»¾¬½¾¨¾¿¨¼¼©¾¾©½¼ª»¾©½¾¨¼À©À½ª»¾¬¼¾¨¿¼¬¾ºª¾¿¨¼»ªº¹§¼¾©¾º©¹¼¥»¹¦¼¹¨¼º«¹»¦½¹¦»·¥¹º§¹µ§º»¨·»§»º¥»º§·¹§»·¥º¸¨¹¹¤¹·§»¼ª¸¹ª»¹¥»º¦»¼ª»¹¥½¶¦º»«·¶§··¤·¹¨¹¸£¹·¥µ¸§¹·¦»·¦º¹¢¸¶§·¶£º¸¤··¥º·§½¶§¶µ£º·¦¸´¨·µ¤¶¶¦¸¹©¶¶¨¸¶¦·¶¡¹·§µ·¦¸·¢¶¸¤¶´¡·µ£·²¥µµµ¶£¶²¡µ³¤³³³³¤·· ³°£·´¢µµµ² ·±¤³´¡µ° ´±¡³³£³³·µ·³¦¶³³³¯³¢³³³²¢´ ¡  ¡¢  ¡£¡¡£ £ ¡ £¤¢¡¡ ¤¡¡£¥ ¢¡ ¢¢¡¡£¤¢ £ ¤¢¡¡£¡¥¥¡ ¡£££¦ ¡£¤¡§¡£¤¥¢¥¥¤§¡¡¡£¤§¢¨£¥¥¦¡¥¢§£¨§§¤¡¥¦¢¦¦¦¦¦¦©¢¥§¨£§¦©¥¥¦¥¦§¦¦¤¨§©©§¤©©ª¨ª§§¤©¨§£¨ª§§ª¨¬¨¬©¬§©¥¬ª«§«¥¬¬©¬©ª¬ª¬©«ª¯¨«¬¬©°©«¬¬ª«©®§­¬©«­¬¬ª«¦®¬«¬«©®ª«¬®ª°ª°¬ª¬°ª¬­©«¬«®±±«¯«±°«¬®«­«­¬­«®­®¬¬¬°¬®­®¬¬¬­¬³¬°¬®­®­¬««®®±­¬³®«®²±®§®¤§¨§¡£ |qt]dKzYDkUKgQO`dUgiUgfQddQf_K`UDdK?[M=UF8WO?QSIWQB[WI[YD[Y?]WF]SDUID]M?USFUM=YKBSSIWOFWM8YQ?UMBUQDYSDWUDWS=YO?UM?UM:]I?UIBWI:UKDSQFYMBYMFWUIQ]I`U?Y]I__IbfM`oS`qOkdMi`M`YQb_QgiUglYlnWqrWnoQqgQnlQgdMl_FkYB_[FgUD]WB][I`WD_UB[U=YQD]U?_Q?]S?YO:WQBWO?[O8UO?[QDUM:YM=YQ:WQDYQDYOF[UBUM?]UKYYI_WK]dUddSinUbu]fw_nw[o~dlltnxnzxwuid{bzdx_zfzi{b{`zwYuoWoqMniUglKgbMf]FiYI]]D_]F[[F]UBbSFWS?YO?WO?UQDYM=WM=QI?SM=YK:QK?QF:OKBUF:OD8WB:OD=QD=QI=MD:QF=SI8QM?QK?OB8OD:UD=SI:UF=QK?SIDQQBWWDUU:WYD`UF]O?YOB[QDYM?]UDYWF]KBYUB[OFUI:WI?SF?UI?WI=QM?SI?OI=YMBSMDYU?[QDYQI[SQ`fQf`UdbOnf]nuqq{ut{¢¬¤¡¤¥£³¬¼¡µ·¶´·´·º£µ¾¡·¹¢¸¹¢º½¡ºº¢»»£½¼£º»¢»¿¤º¿¨½½¤¾À¤»»¤½½¡»À£¾½¦¾¾£¼¼ »¸£¼¾ »¼¤»¾£»»¥»¾¡½Á©»½¢»¼¡»½§¾½¤º¾¤»¾¦»À¦»»¤»¾£¾À¥¾Á£¿¾¡½¾¤»¾¥½½¦¾¾¦»Á¦¾¾¢º½§»¾§½½£½¾§½À£½À£»¾§½Á£¾¿¦»¾¤¼¾¤»¼£»¾¤¾¿©¾¾¨¼¾£»Â¥»¾¦¿¿¦º»ª½¿©½¾§¾¾©½¿¨¾¿¦½¾¡¼¾¦À¾£»¾§½¾ª¸¾¦½¾¤ºÁ§¼»¨½»¢»À§»¾¥»»¦·¼¢·½¡¼¾¢»»¤»»£»»£º¼¥¸¹¥¹À¤º¼ ·½¥»º¦¼½¥»»§¼»¢»¹¥·¹¡ºº·»¥º»¡¼»¥»»¢¹¿¦»»¢»½£»½©¶¼¡¸»¤º¾¤¹»¤»¼¥½¾§¹º¸·¦»¾¢»º£º¼º¼¨º¾ º¹£»»¢¹¼¢»·¤»» »»¸¼¡·»£¸»£»»¡¸º£º»£·º¤»»¢¸»¡·»¡¹¹£¸»¨¸»º¹£»»©¸º¡º·¥¹»¤·º£·¼¤¹º¤¸¹·¸¤µ»¡¶¸¸¸¡º¶¤·»·· ¸º£µ¹´¹·µ¡µ¶¶¹ µ·¢´¸£¶¹£¶· ·¸¢³·¡¸µ¡·¶¢³·¡µµ··¸¹¤¶´·³¡³·µ· µµ¡·µ³º¡µ·¢³¸¶¸³»·´³·µ²³µµ³³³´·³µ·· ¶µ³¶³¶¡¸·¢³²°³²´µ´¡²µ·³°·¡³³·µ°³³´²³³²±´±· ®³°°²°°±±²²°¯³¯²²²¬±²®¯®°°®±¯°¯°®²¯°±±¯°®¬±°°°¬°° ¢ ¤¤ ¡¤ ¤  ¡¢¤¢£¦¡¡¢¤¤¡¢¤££§¤¤¢¥ ¤¡¡¨¥¤¥¤ ¤ ¤¢¥ ¤¦¤¥¤¤¥§ ¦¥¤¥£§¤¨¤¥¥¤ ©¥¦¤¦¡«¡©¤¤£¦¢ª¢§¤ª¢§¥§¥©¦ª¦§¤¨£¨¦¬¥§¢ª¨¬¥ª¥¨¦¬¦¬£ª¦©¦«§¬£¬§«¤ª¨¬¥­§«¦¬¦«¨¬¤ª§¬§­¤­«©ª¬¦®§ª¦©§®¨¬¨®¥°«ª¨«¨®§­¨ª«°¨¬«¬¨®¨¬¨®©®«±©­¨®¬°¬¯©®©³­¯¬­¨²¬¯¬­¬³­±¬¬«³¬°¬²¬±­³¬³«²¬³­±®³¯³¬¬­²­²¬±­±¬±¬²¬³­³©²­²¬³®³¯µ¬³¬¯¬³®¶®²³´®±²±°³°°¯®²°®´¯µ¬µ­²¬³¯³¯´°³³³³¡´²¶²³­³­µ¯¶¬³¬©¬±ª¡uq__S{W[l[Sl[]fndonbnl[odYr_QnQMiMK_IM[DI[MM[[U`YUf_Wg`]f[]f_Sb_UiUO`YO_USbMMdOM_SO]QQ_OK`OMbUOfSWbSW`SK_UO`QQ[WOfYMdUQ_QM`MIdQI]SU]KKfOK_UW`UOdUQf]U``Q`]Yd__fb[kfYni]kfUkgYni]nl`qi`rgbnibrk_xq_rl_tiUudUnfWr]Ok_Qk`Ol[QkYKi_OiSSgYMg_Sd]SlYDfUSbYOgSKf[MdWMbSKdWMbWObQKbWK`WSbYYgWOd]Ub_Qf[Sdb_dbYko`owiqwfwxlxxiwqrtxz xroqw|wwo~gz`~rb{xbuiYnbWn_Wl]Wi[SkYSbYMkQWd[Kb[OfUM_WObMFdQK`SI_OO_MS]MKUKD]FK[FKWFBbFKUIB]BK`BKWFMW?IWKM_MFWMO]OI_FKUKD]FBYBKYMM]KKYOMUOQ[ISbWSb[SdSSfUKdWQ]KOdQQbQObSKbUM_SS`UK`SK]SO]QIbMK`MK`IM[MIfOO[MQ`UMfSQb[OfSWid_lf`ugYqg_rnqwzq¬¤«¨¡¥¢¨¬­·¦¸½¦·º¥¼¹¢»¹¥¹¾¨»»¨½½§½½¬¾¾©¿Àª¿»¨À½§ÂÁ­À½«Á¿¬ÂÁª¾½§Â¿§À¾«¾Á®Á½«¿Àª¾½ª¾Â¬Á¼¨¾¾ª¾½ªÁ¼¦¾¿­¿½¬Â¾«À¿¬ÀÀ§¿À¬Â½­Á¾­¾½¬ÁÁ«¿Á¬Ã»¨ÂÃ¨ÁÁ¯ÁÁ°ÄÁ­¿À¬ÁÁ¬ÁÁ¨ÁÀ®¿¾­ÄÃ¬ÂÁ®¿¿¨¼À¬Á¿­ÁÀ©ÀÂ¬Á½ª¿¾¬Á¾©Á¿¬¿Á­¿½¬ÁÁ¬ÂÁ®À½¬ÁÃ¨ÁÁ­ÀÁ­ÁÁ¬ÃÃ¯Â¿®ÂÁ¬ÀÁªÁÃ®Á½°Á¿¬ÃÁ­¿Á¬ÂÁ®ÁÂ¯ÀÀ¬ÁÁ¬¾Á¬¿¿¬¾»¦¾Áªº¾©ÂÀ¨¾¾«»¾ªÁ¼«À¼«À¾«¼¿­»¿©»¾¬¾¿®Á»«¿½«Ã½¬»¼¨¼»¬½¼§¾¾©½»ª¿Á®ÂÁ©À¾«À»©¾¾¬¾¿¬¾»ªÂ½©»À«»¼©¿¼­º¿©¾¾¬¾»¬À½«½¾¦À»ª¾¼¬¾¾§¾½¨À»®¼¾©¿¿ª¼»©¿¼ªÃ¾«½¾©»»ª¿¾ªÀ¼¦¿Áª½¹©Â»ª½¿¬¾¼¦¿½ª¼¾¬»¾¨¾¼«½º«»¾ª½»¬½¼§»»¨¼¹ª»¿©»½§»»¨¼»ª½»¥»»§¹»«¼¼¨½º¥ººª»¼¥»»¨»¹£»º©¾º©½¹¨¼»«¼·¨¹µ¨»»§¹º¤»µ¢¹¸¦µº¦¼¶¨»»¨··¦»·¥¸¹©º·¥ºµ¥··¨¹¹§»µ§¼¸¤¹¹¨»¶¨¾º¦ºµ§¸µ¤·¹¡¹·¥·´¦¹µ¦»·¤··¥¹µ¦¸·§ºµ¥»¶¦·³£¹¸¢º·£»¶¤¸¶¨·µ¦¹·¥¹¹¤¶´¥º·§µµ¤·³¢¹¶¡¶µ¥µµ¡µ´£´¶¤´³¦»³¤µ³¢·³¤³³ µ´¥³´¥¶³ µ³¥´²µ²¡¶³¡±¹¡µ±¡·²¢³²´µ¥µ³¡³³¢³²µ¯ ³²¡²°£³¡ ¡¡  ¡  ¡¡¡¢¢¤¡££   £ ¤¤£¢¡¥ ¢¤¤¡£ £¢£  £¤¦¤ ¤¢££¢¢§¡¡§¡£§¤££¥£¦£¦¢§¢£¤¦¦¤ £§¥££¤§¢£¥§¥¦¥¦¦§§©¤¨§©¥©¥§£©§§¦§¤¨¦¦¤©£¨¦§§ª¦§§«¦ª¨©¦¦¨¦¨¬ª©©©©¦§«ªª§¬ªª©©ª¬¤©ª¨¨¬ª¬«ª§¬¬¬ª¨¬¨«­ªª««¬¬ª©««ª«ª©©¬¨­«­®­¬«©®¬«©­«°¬­¬­ª­­¬¨««®«¬¬¬«¬ªª¬¬¬¬­¬¯²®±­¬­ª¬­­®¨««³¯­¬¬¬²¬­°¯¬¬­®«²°­¬±®¬¯°¬®¦¥§«£¦¤{lwYdSwYBoWId[O`dUdrYknWg_QkWFbUB]M?WF:SD=UDBSQFY]MY`M][M_YOd]M[UD]UF]WB]Q?UODWQ?WI?WM=YQDUO=[Y?SSD[SDYUD]YFYU?YUDWQIUW?UU?[OBUW:WQ?YI?SO:UK=SQDSOBYQ?[QBUUK[UB`UMY[I]WF`[Ob_Mb`KbdQdiOfgOfdOgnUinSikSgdSgdIgdKg_Ff]Ig[Bg]I`bIbW:`YFb_D_[?d[D_[D`[B]YDY]D`YB_[F[`F_YB_S?_U?]UB_W?[[I[WF]UD_]I`]I_`I`_K`dQ]`UgiUkx`loSnz`t{dufwintu«|¢ttrtutlgi_zw]u|WxnQqkIl`Qg`Fg[Fd[K]SD`YD_YKYYD`UB]UDUK?YF?UOBQIDSF8WM=OI?SF8QI?OI5KD8UI?QI8K?:O?8MF=I?:O?8QKDKI:SD5OM?QF5O?8OF=UD?QF:QIDSI?SK?YWKQ[IYWF[_F_SI_M=YI?WO?YI:UODYQB[Q?YMDUOBUM=]M=OM:SI?UF?UMDWMFYUD]YD[QB]OM]dW_gUg_Qfg[ltnt||nd« ¬¤ ´ ®¹ ²¸´´³¹ ¶¸ ¶¾¢»¼ ¸» ·À¥½¿¥½»¥¼½¥½»¡¼¾¤½¿¦»»¦½»¢¼»£»¾¤¼¾¥»¼§¼»£»½¢½½£»»£½»»»¤»º¦º»¸¼£»º ¼»¢¼À¤»»¤À¸£º¾£½¼¥½Á¢»¼¤»¾§»¾£¾Á¦½Áª½»¦¿¿¥ºÀ¦¼¾¦»¾¨¼¿«¾¼§À»¥»¿¥½¾¤¾¾¦½¿§¼Á§¾¿¤¾¿ª¾¼¢½À¡»¾¬½¾¨¼¾¢ÀÁª¼Ä¥»½¥¾¾©»¾¥½À§½¿¥½¾©Á¾¥½½§¾Á¥»½¤½¾©»¿§º½£»¼©¿¿¥»À¤¾½£½¾§¸»©¼¼¤½¾¨»»¨»½¡»½¡¹¹¤»¾£·»¤º»¤º»£¸»§»»¥»»¦¹¾£·»£¹º¡»»¸º¢º¹£¸º¡·»¤¸½¥»¸£»»¥»»£¹»£º¾¡·½¥µº¡»¼¢¹»¥»½¢º»¢¸¼¦·»£»¼¤·¾£·º£¸· ¸»¤¸¸£¸»¡¸»¥·º¡º»§»½£¸»¸º¤·»¥»¼¤»»¤º¾¤¹»¦¸» ½»£··º¹¥¼¸¦¸º£··¥º»£¸»¡µ¸¸»¤·º£¹¹¢´¶¢¶º ´·¡¹¸¢··¡·¹£¸· µ¸¡´º¢µ¸¡¶¹¡µ·£·· ¸·¢¶» ¶¶ µµ¡²·£·µ¢¶¶µ·£µ·¡··¢µ·£³¸´·¢¸·¢³¶µ³¡²·£³¶£¶´¶¶¡²··µµ¸¡³¶³´´³³² ·±³µ ·³³²³·³·°µ³²µ³³·¡´¶±µ³¶³µ³¶´²´µ±·±µ ³²¶µ²´ ³±²²°¯³²°³®´³³²±³²±¯°¶±°°®°°°²¯³°²¬° ±±®³­³¯°°­«±«³¬®°®¬°®¡¤ ¢££¢¡ ¡¤¦¡¢¢¢¢¤¢£¢¤¥¥£¡¥££¥§¤¢¦¤ ¤¢ª¥©¡¥¦¦ £ ¥¦ § §¡¦¡¦¤¦¤¥¢¦ ¨ ¨£§¤§£«¥ª¥¨¡¨¡§¢§¤¦¢ª¡ª£¨¡«¢©¡¤¢¨¥«¢­¦¬¦§¥ª¤¬¤«¥ª¤ª¥­¥«¤®¤ª¤©¦©¦®¨¬¦¬¥¬¥ª§­¤­§®¦³¥¬ª¬¨¯¦­¨¬¨¬¨±§­¨¬¨¬¥®§¬¦¬§¬¨¬¨­¬¯¨°©­¬®¥®¬±¬³§¯«¯§±¬¯«³¬±­±«°ª°¬²¯°¥®­°¬¬¬°¬³¬³«²ªµ¯­ª±¬³¬¯¬³¬±­¯­±¬³©®¬²®³¬²±¯©²ª´­²¯³©³¯³¯³­³¯³¬³®³¯³®±¬±­µ¯³°·°³³³®µ°³¯´°µ®²²²°³²´° ³¯¶³·° ¹±´±¶± ³°´¬¶¬­¬­¬¢zzin_bWx[MoSQiU]fifowdol]u_UoWSiQFdQMdKMbOQ_KM`[W`k]kd[n_Sk]Yl]UnUKfSUfUKiQOdMMbSM`QObSQdYOb]Kb[Si_Qd[QfWOd[ObUFdQK_SO`SMbSK_OQ_SKbOKdMIbWK_QObWK]OSbQFgSK_SQ`UOb[QfYKdYOd[Sk]Si`Uk[Wkf[ifYni[qn_oq[wkWxg[ukSogUofWni[u_SogYliQn`MqfQl`SkbQlfSkbUl]Ol_OkbQibQl`SlfUigSkdSk`MidKkWOi_Yg`Mi`SliUk`WkdYrfYll]kk]oudutfuxg{nouw¢z¡ª´³¬©®´°¡§|{qkkng{]q_xlWxgYtbWndSr`So_Qi`Sf[KgWObOMdKF`QQ]KQbID_QK[KK]KKbOMYOF]KI`KI]KD]FM`KFUFF]BDYFI[IK[KK[KF_KOYKI`KFWMI[MD]MKYKO_QMYUO`SSbWQ`YQk[SfUSgSKdQOdIQdMFdFM`QM`QObQO_UO_KDfQF`IM_MK`KD`OQ_KKb[Qb_UdOOfSSi`_ln_libqg_qokxxz~q{­¨£¨©« ¬º¥µ»¦»¸£¼¹¦»¼§¼¹¦À»§¼»¨½»¥¿¿©Á¼«¾Á«Ã¼¬¾¿¬ÃÃ«ÁÀ¬¿Â¬ÁÁ©Ã¾ª¿ÀªÁ¾¨Á¾¨Á¾¨Àº§¾¿¦Á¾¥À½¬Â¾¨¾¾©Â¾¨Â½«Ã¾©ÀÁ¬ÂÁ¨À¾«Â¼©¿½®ÀÁ­ÀÁ«ÁÁ¨ÂÀ©ÁÀ¬ÀÀ±Á¾­ÄÁ©ÁÀ¬ÂÁ¨ÀÀ¯ÂÃ¬ÂÁ¨¿Á­Á¿ªÂÁ¬Á¾­ÁÁ­ÂÂ­Ã¾§À¾¯ÄÁ«ÁÁ®ÁÁ¬¿¿«ÃÀ®Á¿¯À½¬Á¾®ÃÀ°ÀÁ«Á¿«¿Á¬ÂÀ«ÁÁªÂÁ®ÄÀ®ÂÃ©ÁÁ¯ÁÁ¬Â¾¬Ã¾®À¿ª¿Á«À¾¨À¾­À¾¬Â½©¾¾¬À¾ªÁ½¨Á¼ª¿¿¬Á¾¨¿¼¬¾¾©¿¾¬ÁÁ¬À¾§¿¼«»¾¬Á¾¯¾¾©À»§¼¾ª¿¼©Á»©½¿ª¿¿¬Á»§¼Á¬½¼¬¿½­½¾¨½¼¬»¼¨ÁÀ¨½½¬À½¦»¾¨½¼¬½»¥À»¬¾½ª¼¼§Á½¤½»¬¾½«¿¾¨½½¬À½§Â»ª½¾¨¾½§¾¼­¾¾­¿¾ª¾½©Á¼«¼¼©»¼ª¼¼©¾»ª¼¾©Á¾¬¼»«¾»ª¾¹¨¼¹§¼»¤»·§¹»§¼¹¦¼¸¥»¼¨»¼©¾¹©¼»¦¿º§»º¨º¼©½¾¨½¶¥¼·§º·¨¿»¥»º«»º¨»·§¾»¤º¸§¼¸¤¾¸ªº»©º¶¨»·¥¸¸¨º¹¤º¸§¸·¤¸¹»º¦¼¶¤¹¸¦¹¶¦¸¹¬·¸¨½·¢¸¹¥¹¹¤º¸¤»¸¥¸º¤º·«º¹¨¼¶ ¹µ¥·´¥¸¶¥»³¤º¶¥··¤·µ¨·´¤¸·¢¶¶§¹¹¡¸¸¥··¦¸µ¥¹¹£¶¶¥¸´¤¶·§º³¥º´·³¤¹³£·³¸³£¸µ¥·´¥º´¡´³¤·±·³¥µµ§µ³¶³¢·³³³³³¡´µ¦¶µ£¶´¡µ³¡¶³µ¯·±¢³³µ¯µ´¢³³±|¡¢¡¡¡    ¢ ¢¢  ¡¡££ ¢¥¡¢ ¢¢ ¤¤£¤¡¤ ¥¤£¡ ¡£¤¡¡¡££¥£¥£¨¥¤ ££¤¢¥¤¤¦¢§¢¡¤£ £§¡§©¥¦¦¥¡¥¥§¨¥£§£§§¥¨ª¦¦§©¥§¥ª§§£¦¥©¤§¥§©©¦©¥§¥§£¨¨¨¦¬©¬¨©¨­©§©¨¥©¨«¨¨©«©­¨©¨«©«ªª¯«¥¬©§ª¬«¬¨©«¦¦««ªªª§««¬¬¬©¬§¯ª«­­¬ª©«¬«¬®¬¯¬¬¨©©­¬­¨­¬¬°©«¬«¬­¬¬¯¯®«­«®¬¬°®­­¬¬¬¯¬­¬°¬¬®¯«®¯­®¬«²¬°¯®¬¬°°­®¬²²®®¯¯±°¯®¬­°«©§¥¡{krW`KrYMiUBgID`YSdn`fuSn_SdWFbUDbQB]IBUF:QI=WSKW_M_dQ`_M``Mb`I]SD[UD]U?]SDYMB[Q?WSDWYB[[=]UF[]FYUF[_D[WDYOB_S?]K8SMBYO=SO?SIBWM:YMBUO?YS=QOBYQFYQ:[Q?]S=_U:[QB]SI]QB_SFYYI]UD`YF]_D[bIddIdiKkdIdgYliQiiIgdSgqOglOgfQlgOilMlkMnlOidQnlMlgIfkKggIgdQgiIgdFgdOigM`fMgdOdgOggIgfQfgOi`KfbFbbFfbMddKdgQggOiiQdoUlqUqqYow[u~]tdxqr£uª{±{²·À¢¾¡Á¢ÁÀ¡Æ¢Á£¾ »¯t ngkf`]|zW{tQruQnnKnnQk`Ik`DdWDdOD]SBYO?YO?YI8QI=]I8UKBMI?YM:SOBOM?WIBSO?SM=QK8SI=QI:K?8UK8MM:QD:UI=OD:QO?WK?OK:WF:QKDOMDQIDWQBQOFUMFUWDYYF]SF]UF[Q?WK?WOBYQBQQBYI:WMDWM=WM?YOBUF=UI=UI=QOBWMFYQFYUI]SD_QK_`WbbOggWffUqn_t||n~i|£§§¡¡£²­»¡°ºµ´£¶º ·»··¸¾¦¼À£º»¥¸·¡ºÀ¦»¾£¾¾£¹¼§»¼¦¼¿¢½À¦¾»¤¼¾§¼»¥¸»¥¸½½½£»¾£¾½¡»º¤ºÁ¤»½¢½¾¢¹¼£»»¤»¿¢½¾¢º»£º½ »¾£º¿¦½¾£¼À¦»½§¾¼£¾À¥¿À¦½½£¼½§»¿§¼Á¦¾¾§»Á¥¼À¥¼¿¦¾À§»¾¤»¾§½À§¾¾¨»¾£¼À¥º¾£½À¥½Ã¥¸»¦¼½¨¾Â§»½¢»¾§¾Á©¼¾£»½£¼½£»¾©¼¿¥»½¦»»©»¼©½¿¨¼¾§º½¢¿¾¥»½§»¾¦¾¿£»¾¦º¾¤»»¡»¿¤»»£»¾¥¸½¥º»¡»½¥»»¤·½£ºº¢¸½¥·¾¤»¼§¸½§¸½¦»º¡·½£º¹¡µ»¦»¾¤»»£¸º¢º¼¦·¾§º»¥º»£¹½©»»¢¼½£»»¡º¾ ·»¥»¹ ¸»£·¾¡·º£¸·¢·¸¡·º¨¸¹¡¸º¡¾»¢¸¾£·º»º¥¸¸¦·º¢»»§¹»¦¹» ¸¸¡¸½¤¸º¡·¼¤ºº¡¸º¤¹·¤»»¤¸»£¸º£µ»¡·º ¸· ¹·³»¥··¶º¸·¥º·¶¶£·¸¡³¶·¸¡··¥·¸£¸·¤·»¡¶¸£·¸µ·£¶¶£µ¸³»¥·¸ ····£µ¹¸¶£µµ¶·¡µ¸¡³·²·µ¶··¤·º¤·¶´¹³·¡³µ´¶¶·²µ·µ¡´¹µ³³µµµ¡²²´·µ´´²²´³·³· ²µ³´¡´´³³µµ¢²³²³µ¶ ²³²·µ³³¸³³µ³­µ¯µ²²°²³³²´±²®²±°²°°²±®¬²±µ¯±²²°²²°°²¬°²±¯±¬®­°®²«°®  £¥¥¤¥£¢¢¤¡¢¥ ¢ ¢¤ª¡£¡£¦¡ £¥¢ £¦ £¤£¦¤¡¦¤ ©¥¦¡§¦§© §¡§ ¤ § ¥¡¦¡¥¥ ¦¤ª§¡© ©¡©¡¥ ¨£§¥¬¡ª¢¦¤ª£¦¥¬£©£¨¤©¤¦¢¬¥§¥«¤«¦¬©¬¡©£¬¥©¥«¥¬£­¨¨£¬¦©¨©¢ª¨¬¤«¦¬¨¬¦­¨®ª®¨­©¬¦¬¤¬¥¯ª­¥¬£ª ®¨®¨¯¥¯©ª§®©­ª®©¬ª¯¬­ªª¨­¬¯©®­´©±¬®©¯©¬¬³©±®­©¯¨°¬­®²¬­¨³¬±«²©®®³«³©³¬²©³¬´­¯«³¬®ª³­²ª³­³­±¬°®±¬²¬³°³­³ª³¯±­°¬°°³¯²¯¶¯±°³¬´®µ­³®³­µ°³¯´°´²²±²­´®³¯³®³°³®µ¯´°³®´¯·±³°±²³¨­­¡§~{ln]bYx[WlWOlQUkd_kognl]u[UlSOiSOiUO_KIfIMbSQ`]_diWnd[o_Un[Wi[SfUOkQMgOO`YMbUKfWSf]Uf[Wi_Ui`Uf_SgWSfSOgWKbOM`SMbOF]KMfUM_SF_OKdQK]SK`KMgSKbYMbSQiYId`Of_Qi_MgbOk[Ql`Ql_Ul_Mn]Ok[WlgYqdWukQtf[wiWrl]ot]xrUwnWwo]wq]xo_xu`uu[rt]{x`uz]z{Wzu]ut[orUur[zu]uoW{t[ut_wqUwq[un[xlWuqYzoUtnUznWuoYui[ul[wr`zwYzufzxbzg{l|lnq¤®¶¼¢Ê§Ê¬Ñ±Ü²Û·Ù±Ý³Û ·Ö¢³Ð³Ð°Î®Ã­µ¥¤|¥~¡xuundi`zb~uYxt[xiWr_Uq]Sl]KgUSiUK`OMgQD]SMbKFdQI`QO]QKbWO]OMbQO_KI`QK]IK]II_KKUQM]FI]KM[KKWKK]OIUMF`ID`KK]QK]KF[IK[OM`OQbWS`[QdSQfWQdYIbSKfSM_MO_MMbSD]MM`QM_OM`QObQI]MK`IK_OKbKM_SQbYQ_WMgUSf[[fdWnd_oi_wkfxz{uª©§¥¦£«¼§³¼¢¹¶¥¹¿«»½ª¿º¦À¼§¿ÀªÀ½¨¾»¦¿¾¬½¾¨À¿©ÁÂ«Á¾¬ÁÁªÀ¾¯ÂÃ¨ÁÁªÁ¾¨¼¾©Â½¦À»ª¼½©Á½§À¿¬Á¾©¾¾§ÁÁ¬¿À«À¾¨ÁÀ¨ÀÁ¬¿¾©Á¿©Á¿©¾¾ªÁ¾¬Ä»ªÀÀ¬ÂÀªÁÁ¬¾Á®ÁÂ¨ÀÁ­Á½©ÁÀ¬ÂÁ¬Á¿¬¾À¬ÂÀ¬¿Á©¿Á«ÃÁ¬¿½«ÃÀ¬ÁÁ®ÁÁ«À½©ÂÀ©ÁÁ¬¿¿ªÂ¾­Á¿®Ã¿­ÁÂ¬ÅÃ®¿Á¬ÂÃ¬ÂÁ¬ÀÀ­ÃÀ«ÃÁ¦¿Á­Ä¾¬ÁÀ©¾À«Á¿¨Á¿¬À½©À¿¨ÁÁ©¾¿§À¾¦À¿§À¾¬½¾©À¾«¾»«½»¦Á¼©ÁÀ¬¾¼ªÁ¾«¾¿©¾½©¾¿«Â¼§¾½¬Á½¦¿»¦¾¾ªÀ¿¨À¿©¾¿ªÀÀ©¾»§¾¾«¾½ª½¼¬¾¼¬Á¾©À¼¬¾¼©¾¼¦À½ª¿»ª¾½«¿½ª¾¾ªÀ¾¨¾»ªÁ¾¬½¼¨¾¿¨¿¼¬Á¿¬Á½«¿À­¾¼«¾»§ÁÁ¨¿Á¬¾»¨À»¨¾»©»¼©¾»«¿¾¨¾»©»¹§¼»¨¼»ª¿»§¹¿¦¼»«¾½¬½»©»¼§¼º¤¾»¦º»§»»§¼»¦½¹§·¶¡½»§¹º©½º¦»ºª»»¦»¹©¼º¦»¸¬¹¾¨¾¸¤»»§¼¹¥¼»¥¼º«»¹ »¶£¹º¥··§º¹¨¼·¦·º¥¼»§»¶¤¹º¨º·¤¼¶¦»¸¤¹·¥¹¶¨»¹¤¶·£¹´¦¸¶§º´¤º¹£»µ¥¹¶¤¶·¸µ¢¶·¥·µ£¶¸ª¸·£¹·¢»·¥º·¥·¶¤·¸¥·µ¦¹·¥º¶¢·¶¦µ¸¦»º£¸¶¥¹· ¹±¤·´¦·³£¶´¢µ¶¤¶·§¹°£¶³¦·³£¶µ µµ¢´²¥³³¡¶¶ ·µ³³³³¢¶´¤´´ ¹³¤³³¡µ± ¶±µ²¡³°¢´°¡²³³ £¡¢¡¡ ¤¡ ¡ ¢¡¢ ¡¡¢¡£¡¢¢ ¥ ¡¥¥¤¡¡££¢£¡¢¡£¡¥ ¡¦¢¢¤¡¥£§¢¢¦¥£££¡££¥§¡¡§¢ª¢¦£§£¦£¤§§¤¨¡¦¤¥§¦¤§¦£¤§¥¦¤¦¦©¢§¨©§¥¥¦ª¤¦©¥¨¥¨¨«¥¨¦¬¥§¢ª§§¨¨§ªª«©¨¨«§©§«¦¬¨¬¦©¦¬©ª¬¬ª¬©«¬­ª­«ª¬ª©«¦««©©¯«¬ª¬©­ª©­ª¬«©«¬¬¯¬¨¯¬©ª«ª­ª©ª©¨¬ª¬«¯®««°­¬®¬©°¬¬¬±¬¬©«­®«®¬«¬­¬®­¬¬®®­©®­®¬°­²®°¯°­¯¬­®°­¬¯®¬®¬³³­¬±«®±¯¬­§©zdnWfUt`Kk_IkYFf]Q`iY`q[k`QkYIdWDUQ=]QD]M?UIBY]OYfM[iUg`Mg_I`WF`QDbQD[Q?WSI[WB]QDWSD_[M[`O_bI_]I]QBYSB]M?[S?YQ=WQ?YS?YO?SOB[UDYY=]Q8YS:YY?]W:]W?__D`_IffKgkOinMnnOgkKdnIqkFqrMlnMooOquQitOttKqrQqxQrwWzwUrwWttQquSuwUuzS|{Yu[u|SuWx`t|SuWzWt{UtYzWrSxUzQtYzQu[x{StwUw{StUr[zzS{Yz{S|_]_d~kn£t§z­{»Å Í§Ö«Ü­ã¤¶ä§´æ¦¸è©¼ç©ºè¥¸æ©·á·Ü ºÜ²Û¶Ó²Ê«¾¥¸¥·°{¬rlgfd]Wz{YtxUxoKrrKkiIf`DfYD`S?]S:_QDYQ=YM?WO?YW8WO=UQ?YQ=WI?WM?WF:QO:SI:QM=UQ?QI=UM=UK=SK?UO?QIBSI=SI=UF=UF8UIDUS?WSDWQDYQIUYI`_F[OB[I:UK?WKDYM8USBSK:SK?UI:YO?YQBSI?UF=UQ?YI?WOFWUB]U?]SI`dQ`]QfiYinYntdturu§¤¡¢² «»³´µ¸£¶¾¡¶½¥¸»º½£·»¤»·»º¢º½£»À£»¼¤¼À¤¾¾£¼¼¢½¾¤»¾¢»¼¡¾¿¢¾ºº½¤»½·½¼»¡¹¿¦½½¤¿½¦»¾¥¼¾¤½¾¥½½£»¿¤¼¾¦¿¾¤º¾£»»¡½¾¦ºÀ£»¾¦¿¾¦»Á¥¼¾¢½¼¦»½£¼À¦Á¾¤»½¥»¾¢¾¿§¼¾¥»½¨Â½§¾À§»½¥¿½£¹½£¾»§¹¼¤½¾¤¸¾¢½Á§½½¥»À¦¸¾¤½¾§¾¾©¼Â¦½¾§¾¾«¾Â¦À¾¦Á¾¥»¾§·À¥¾¾§ºº¦»½£»¾¤¹¼¤¹½¤¼¾¥»»¤¾»¡·¾¤º»¤¸»£»»£¸½¤¸»»º»¾¢¸» ¹½¨½¾¢·½¡¹¾¥¹¼£·¸¥º¸¢·¼£¸¾¦¸» »»¦¸¼¢º¾¡·¼¥¸¾£»¼¨»½¥¹»¡»½£»¼£·¼¥º½§»Àº¼¢»»£º¼ º¸¦º¹£»»¥ºº§¹¾¥º»¥¹¾¤»¹¡º»¤»¼£º»¡¸¹£º»£»º¥·»¢¸»¢º»¦»¼¡¸¼º¾¢¹»£»¹¶»¨¸»¢¸¾¤·»£¸¸£¹¸µ»¡¶¹¢¸·¡·¸¢··¡¸·³¸·´µ·¡µ¸·¶¶¸¶º³¶ µ·¡·¸¶¹¢´·³¹¸¶£¶µ¡¸¶ µµµ·»·¶¹¢³¶º· ·· ¶·µ·¢µ·¶·µ·¶´²µ´³ µ¶µ¸´´´¶³·¢µ¶´µµ³±³²³ ³¶µ´³µ£³·³´¹¶²µ°¶ ·³ ¶³¡³µ ´µ³³³¶´³±³³µ°²³²³µ±³²±³³¯¯³³¯±®²±´²³²±®²°³¯³±°±±±³®®³²±®­®±³¬¯¯²°®°¤¤ ¨£¡¤¢¡¢¤¦  £¤£ ¡¢¦  £¤¢¤¡¤¥¥¨¡§¦ ¦ ¦£¤¥© ¤§¥¡§¦¦¢§¡¨¡¦¢¥¥§¡¨¡¨¨£ª¡§¢¨¢ª£©¤§£§¥©¤«¤¥¦ª£©£¨¥ª¨¬¥¨¤«£¬¤­£§¥¬¦ª§¬§«¤®¤­¥©£ª¤©¦§£¬£¬¥¬¨©§¬¦«¨«¦¬©ª©«¦¯¦¬¨­§¯¥¬¬¯§¬§®§¬¬¬§³¦¬¦¬¦¯ª­©°¨³«°©®©±§®ª°¨³©²¨­¬²©­¬²¬¯¦¯¨±§¯¬¯¬°¦¯©°¬¯¬²¬­«®¬±«®­°¬³ª±®³¬³¬®­±ª³¬°«²®¯¬³¬µ¬³¬²­³¬±­²ª³¯±¬´¬³®±­³¯³¬°³´±¶¬¶®¶°´°·¯²«µ±´®°¯¶®´¯µ°µ¯µ²³¬³°µ³³±²®³³³¬¬«£{|ff[`_t`Uu[Wo[[k``ot_nk`qbWtUSl[UiWIbKO`OM_SSbf_igdii[nb[nWOkUQiWMfUQdYMf_QbSQbQQbUWi_Yif]i]OnYQfYQb[FbSOfWOd[Kd[Sb[Md[Qb[OdWOi[SiYOk[KifSkgUlnWouYrrSwu[xx[z{]]~_~~`|_fd`g`bfddd``ffffkkilffkkkkgifnlgfbioq qrlt¡zu¢{¬¸¼¢Ä©ÐªÒ¬Ý¡°ã¬µé«»í®Áï³ÁïµÃò³Ãñ´Æñ³Ãð²Æñ°Ãï®Äì±Äë¬¿é¨Àæ¥½Þ¶Ô·ÒµÈ­Á¬¹©µ¯|¡¬z¥uqgg`]f|wbzo[{nYu`UiWKk[Il[Kg_KgQMfSK_WKbYQgUIbFIdKFfOIdMD`MK`MO[KI_OD[WM`OM`KF`OQYOM`SK`UO_OMbKF_OQ`QO`KO`UQbUQbQQi[ObYMgFIbMM_QMbOO`QOdUM_MK[SM`MO_MM_OF]OI_OF_MK`SU`UObSQbQQi]Wg]_lk`oldtlf{qo|¢£ª©¨£«·¤¶µ¤¼·¥»»©¾½¬¿À¢Áµ§¿º¨¼¿¥½¼¬¿¿©ÁÁ¦ÂÁ¬¿¼¨¾½§¾¿§ÅÁ©Ã»ªÁ¼©¾Â®Á»¨¾»ªÀÁ©¾¼¥¿»§Á¼¨¾¾ªÂ¿¬Á¾¬Á¿«À¾©¿¾ªÀ¾©À¾¨À½«¾¾ªÁÀ¦Ã½¬¿Â©À¿¯ÃÀ¯Á¿ªÁÀ«¿¿­ÁÁ¬ÀÀªÄÀ¬ÂÁ¯Â½¬Á¾ªÂÀ¨Â¿¬ÄÁ¬Ã¿­¿¿¬ÁÁ«¾ÁªÁ½¨¾À¬Â¾¨¿¿­Á¾«Á¾©Á¾¬ÁÁ«Á¾¬¿ÁªÂÀ­¿À­Á¿¬ÄÂ«ÁÁ«ÂÁ¬½¿¬ÁÀªÂÁ­¾¿¬À¼ªÁ¾¬¿À¦Â¿©¿¿ª¼½©¾º¨¿À­¿¾©¾»©ÁÃ¬¾»©¿¼§Á»¬½À¬¾¼ª¾¾¨¿¿©¾¼¬¼¾¬½½ª¾¼«»¼¨À½ª»»§¿·¦¿Á«¾½¨Á½¨¾½¨¾»«¿½ªÁ»­¿¾¨¾»«Á¾«¼Á¬¾¿­À¾«À¿«»¾«À¾©½¾­¿¾©Á¾ª¾½«¼¾¨¿¼¬¿¾«¾»§Á¼«¼¿­¼¾¬¿»¨¾¾¥¿¾ª½»ª½½­¿»«¾¼¬Á»¨¼¼©»¾¬¿½§½¾ª¾¹§½½©»½ª¿¹¥º»ª¸¼§¾»©¼¹¤¼»«»º¤¼¼¨¹¹§»»©»ºª»»ª»º¦¼·¥»¹¤¹¸¨»»¨º¸ º»¦»º¦¼¸§»·¥»¶¥¼¸¥º¹¦¹»¥»¶¡¸¸§»¸¨¼¹¦½¹¨¸·¦¾¸£»¸¦»¶©º¸§»µ¥¶¸¦¹µ£º·£¸·§º³¦»º©µ·¥»·£¹¶£¸¹¤¹´¥¸·£¹·¥¹³¦»³¤¹·¤³µ¥º·¦··¢»·¦ºµ¤··¨··¤¸·¤¹µ¤º·¤·µ¥¹µ¤·³¢¸³·³¦·µ ·³ ¹´ ·¶§³µ ¹µ µ³¢¶± ¶³ ³´ ³³ ´³¢´³ ³³¢¶° ·³£¶³ ³°£³³£´³¥µ±¢·²¡³± ¶² µ±³ ¡ ¡£¢££¡¢£ £¡¢ ¡¥¡¢¡ ¥£¡¡£¡¡¡£¥¢¢¤¤¢  ¤¢££¡¡¥¤¦¤¢¡¤ £¥£¡¤¡¡¤¡¥¨¡¡§¥¢¤£¨¦¢¤§¡§¤£©¥¦¥¥¤¤¦¦§¦¦£¤¦©¥¦§§¢§¥§¥¤£©£§§¥¨¤§§¥¥¦©¦©¥¦¦ª©ª©©¥©¨¨§¨§¨¨«¨¨§¨¥ª©©ª­¨­¬§«¨§ª¤¬«¤©®«¬®¨«¬¨¬¬««ªª¬­¬©¬ª©¬®ª¬«¬­®«¬«­«¬ª¬«¯ª­®««¯¬­¬¬©­©°¬¬«®¬®«°®¬¬­®«ª®«¬­¯­¯¬­¬¯¬®¬°¬®­²®®¯¯¬­­®¬­²®¬°®±¬®°¯°±²¬¬­¬¬©©£xgoWdIrbOk`IbUDdYQ`lSfq[ogOl]Mg]DbW?[YFUF:YMD_[MUiObgQ`fMf[FdWI_[FYS?bOI]_K]YD]S?]YFY_DY]F`YI_]B[U?]WB]W?YQ?YU8UMBYQD_U?YWD]Q?`U?]]D[dBdkKgqOo{[oYx]w_z_`][bg`gff`df`bd`f_bb_gfifgdb kgg¡f£k¤g£f¥l¦q¢f¡l¡k¯q³|¸Ã~¿»½|¾¾ º Â¡Ê¥Ò­ß­ã³ã·ä£¹é¥ºí©¾ñ®¿ô®Áò±Áñ­Áó®Äõ®Äò°Ãò¬Ãï®Äï©ÀóªÁí§Áé¥¼è ½â¹Ü´Ú±Õ°Ì®ÄªÆ¤Ã~¡»|²q¨if_[_SxWzwIrnMlkIk`?b_Db`Db`D_[D]]F_Y?`_BY[F]U:WS8YQ?WK:WO?WQ=QF=]M?UUDUQ?]U?YODYUF_U?[Q?YM?YO:QO?UYBYUBYQBUYD`SI_U?YSB]M8YO?WK?SD=YQ?WK:UK:SKBUM?WI:WM?WO?WM?UMBYUFWO=]SD]YFYYM_bUknSdiUon]o|x{¢~x©£¤ ¡­¬»²·¡¶º£¸½£¸¼ ¼¼»¸ »½¹¾¡¼¾¥½½¥»½¡¼¾¤·½ »¼¢º½¤½¿¢»½¢¼¾§¹¾¦½º£¾¼¡½¼»»¡»½¤¾¾¦º¾¤¼¾¤½¾§»¼£»¾¡¾»£¼¾¤½¾£»¾¨»¼¥½¼£»¾¥»¾¦»¼£¼¾¥¼¿£½¾£»¼¤º¾¦¼Á£»½¦º½¡¼¼¥½¾§¾¾¤»»¤½½¥»À¥»¾¥½¼¡»¾¤»»§»¾¡»¾¤»¼£º¾£»½§º¿¤»¾§¼Á£¼¾¡¿¾¥½À¥»¾¥»½¥½Á¦»¾¦½¿¤»À¥º¾¨º¿¦½¼¤½»¦¸¼¡»½¢»¿¢º¾£»¹¡½À¤»¿¥»¼£»½£¼¼§»»¢º»¢·¾£·¾£»¾£·¾¡ºº¢¼¹¥½½£¸»£»¼¤¹½¥¸½¤»½¥·¾¥»¼»¾§º»§»»©½½£¼¾§·¾ »»¡½À¦»¾¦»¼£¸¾§¹º¥»¾¥¹»¡º»¤¹¼¢»½¦º»¤»»£»¹£»¿¢ºº»º¢»»£¸» ¸½º»¥·¾¥·¸£¸·¥º½¢¹»¤»¾¤»¸¡··¤¹»¥¸¹¡·¹¡ºº ¸»¡¶º ·» ¸º£¸º¢¸¸£·»¢¸µ¶» ¶¸¶·¡µµ´¹µ¸¡µ·¡¸¹¡µ· ¶··º·º ³´ ·º ³´³µµ»¡¶·³µ¡··¤´¸µ»·¸¢µ·µ¸··µ¹ ´´³µ¡´¸²µ ³µµ¸µ³³¸ ³·°·µ·µµ³µ´·³µ°·³·³´³¶³´³²³µ°·³µ´µ³º µ·²·³³²µ³³°²´³®¶°´²³³²³¶±²³¯²±°¯²²°³°²µ³°³²³³µ¯³°­±±°²¯²°°°°­°®²® ¤ ¡£  ¥ £¢¥ ¢£¢¤¥¢¤¥¢ ¦§¤¡¦ £¡¤§¡ ¤§¨¥ ¤¢¦¤¥ª¥¦§¡§¦¡§¡§ ¨§¨¡§ §£¨£§ ¥¡¨ ª¦©¢© §¢¨£«¢©¤©£ª£¨¥ª¤ª §¦ª£¬¡©¥¨¢ª§®£­¤¤¢­¥¦£©¥¬¤ª¥¨¦©¦­©¬¦¬¬­¨¬¦¬§¬¤ª¨¬¦¬¦«¥¬¨­¦¬§¬¥­§­©­¥®¬¬§«¨±©®©¬©²¨¯§¯¬±¨°§°¨­«³¬¯¨°¬­ª¬¨¯«°¨¬¬®¬¯¬³ª®©µ©®¯±ª³¬³®±¬°¬¯¬²¬³­±®®¬¯¬³ª²ª°¬³­°°³¬³®±±²­³¯³¯²­±¯³¬±³±­´±³¬±²³¬³°´®³²¶±±®·¯³®³¯³®±­³¯µ®³°³¯³¯´°²°´®µ¯°®´¬³§¤w|gd_[Uti[o]Sl[QgbikqbrrbwfWn]UkUSlUOdSObDIdSYff`gdYlg]kbYi]UnWWi_MiUOkSSfYQbYSg]QgdUf[Wk_UoWQf]QfWMfUS`SKfKOfSI_MS_MMbSOd_Oi[OkfSnl[nr`w|bwi{qlw¤x¨{ª|¯{³±¯{¯|µ¡³±|¢± ¼¡¶ ·{¡µ³u²{¡µ{³u­w­w«u¬u®w­tªw­u­w¬u²{µzµ¼~½~»{¹~·{·³¡Ã¤Í§Ò­Ö¬Ð®Ù³Ø´Õ³Ð±Õ­Ø³Ø´Ù¡´Ù¤·ç©½í®»ð­Áï¬Åñ¯Âò¯Æõ²Èö¶Æù·Êø·Êø¹Êù·ÉöµÊö³Æö¸Êó´Êó³Ç÷·Èö³Èô²Èñ®Éï¬ÆìªÃì¦¿ç¥½ã¿Ý·Ö¸Ò²Ê­Å«Ã¦º§²x ¦tlfd]zbqYwlUukWqgWqgQndWkdSr_Qk`Si[UgYMiUIdWMdSMiSM]WIgQD`KQ`MS_WO_bQiYQbSQiYUgUMdUOfQM`OQ_UKbSO]WWf[QgUOfUK`SOiQKbSMbSMbFMbOO`MK_MK]MMdKM[OI`MM`SM`MMbOM`US`QSbQOkYYbW[ibYnlbli_wlbwoq¤§¡£«¬¤£«¹£®³¡º¼¥¼¾§¿¼¨Â¾¦¾½¥¾¼¬¾¼­ÀÀ¬À¾¬ÄÁª½¿¬¾½¬Á¾ªÂ¾¬ÁÁ¨ÂÁª¿¿­ÁÀ«À½§Á½©½À¨À¾©Á¾©Ã¿¬Á¾¬Ã¿¬Á¿ªÀ¿«Á¿ªÃ½¬¾½¬ÁÁ¦ÁÃ­À½¨Â»¬¾Á­¾¼§Á½ªÁ¿©¿À¬¾À¬Ã¿¬ÁÁ¬Á¾«Â¾­ÁÁ©Á¼«¾¾«Â¿©¾¿¬Á¿¬ÁÀ¨ÀÀªÃ¿«À¾¨Á¾¬ÁÁ©Á¿®ÁÁª¿½©ÃÂ¬ÁÀ©ÃÃ¬¿Á­À½¬ÂÁ­ÁÀ¬ÂÁ¬¿Ã­ÃÀ©ÀÁ¬Â¾©¿Âª¿¿¬ÁÁ¬Â»©À¿©¾¾©¿¼¬À»¬¿¿©¿½®Á¾«½½¬À½ª¾¾©¼¿¬¾½­¿½¬ÁÀ«À»¦¾¾©¼¾ª½¾§Á¾ª¿¼«¿À¬¼¿¬¾À¬¿½­À¾ªÁ¾¬¾¾¨Á½«¾¿®¾½¬¾¿¬¿ÂªÀ¾ªÀ¼¬¿¼«¿»«¿¾®Á½¬»¿«¾º®ÀÂ¨¾¿¬À¿ª¿¾ª¿¾¨À¼©ÀÁ¬½»«À¾«½¼­½¾©¿½¨¿¼¨¾»«¼»ª¼º¦¾¾©½½«Á¾ª¾½©À¼§»»¬¿¼«½»©¾»¬¿½¬¼º¨¼¸¥¼¾©½½§¾º©¾¹©º¿¥»·¨»¹¨»¹¤º¸§¼»©·»ª»¸¥»º¦¾¹©½¸¨»»§»»¨»¹§»»¦¼¼§¹·¨½¹¤º·¥··¥¸¸¥¹¸¦¸º§»¶£¼»¨ºº£»¸£»¶§¸»¡»¶§»¶£·µ¡¹¶©¹µ¥¸¹¥¸·¤»µ¦¾¶¦¹·¨º·¤¹»¢¹·¥·¶¦»µ£º¸¥¸¶¡º·§·´¤³¶¥ºµ¤º·¤·³¦º¶§¹¹¦¹¶§»¸§·¶¥µ¶¡¸³¡¹¶¦µ¶¦»³¤¸³¤µ³¤¶¶£·´¦¸´¤¶³¢¸¶·²¢·¯ ¶´¡µµ¢µ³¥¶³ µ³¢·³£µ¶¡³µ¢¶¯¡¶²·³¥³´¤¶°£µ³¤³³¶³¢³  ¡£¡ ¢¢¡¡ ¥¡£¡¢¡££¥£¡¡£¡¤¢¡¡ ¡ ¥£¡£¤¥£¢¢¢¢ ¢¦¢£¢¥§¥¡£¤£¤¢¢£¥¢§¢¡¤¥£¥¦£££¢¨¥¤¥¨¡§¤¨§§£©£¦©¡£¨¤¨¦¦¤¨§©§¥§©¥ªª©£§§§¥¥¨«¤ª§¥ª§¨ª§§¨¬ª«©¨¬ª©¬¨©ª¬©«¦©§««­¥«ª©¥©¨¬«ª­¬¨««©¬¬ª¬ª©­«©¬¨¬ª«§°¬©©­­©«¬¬«©¬«­«­¬­«ª®ª­¬«²­¬©¬¬¯¬«®°«®«¬¬¬­¬¬­®­¬¬«¯¬¬°®ª°®«®°®¬¬®®®¬®®¬ª®®¬®­¯°®³¯¯±­®²¬¬©«©¨|¡xdnWiQr]KnYKg`D`_M_`UdlSfnUgfDgWI]WB`S?WI?UIBUYMY_Q]dOd[Ob`Qb[I`WI_UB`QDYUI]`I]_O`bIf_IdbFb_Fg[F_YBWSDWK?`U?WI8WO?UQBWU?YW?[bF_bMftOnUr[zb~n¤r«x°u´¹Å¡Æ¡Æ¤Ä§É¥É§Î©Í«Ò¬Ð¨Ð«Ò®Ñ¯Î«Ê©È~ªÉ~¦Æ|¤Ãz£Ãz Âw£¾x ÃzÂxÃ|¥Æ|¤Æ£Ç£Ê¦Î¥Ï¨Ï§Ò¦Ì¦½¨Ã¦ÌªÜ©â³â³á¡·å·ç£¶ã ¸ç·á·Ü¶ã³ç¡¸ç ¹æ¡»ê«½ð¬½ó¬Áó«Äó§Äõ¬Ãø²Á÷´Ç÷±ËøµÇù²Éõ¯Êù²Éø®Éö³Êõ®Ãò°Äö²Æö²Åö¯Æô­Ãó§Ãñ©Àî«Æï¬Àñ«Áî¤¿ç¼àºÛ·Ù´Ò®Ï¬Ë§Ç¥¿³t©lb[WU|wQutKtoQooOquIilOgiFgbDfgFg]?fYDdUD]QF`SB_UD[]?YQ:]YDWQIWYF[[K]_D`S?]UI]U=]U=_QDUYDYQ?]OD[SIY]D[UD`WFYU?]SDYQ=YO=YM8SQDUK:UI:]K?SO=UK=UI?UM:SM=WQBWW?[Q?YSDYUFY`IbfOdfUlkWqn[t|tz¤£w¥ z²©¶²»¡³»¢¹½¤»»¢»½ ¹» ·»¤»½¥¾¿¦»¾£¾½¡¹½¡¸¼£»»¤»¿¤¾¾£½¾£»¿ º¾©¸º»¼¡¼º¡¹º¥»¾¦º¾»»»½¥¾¾¥º»¡¾¿¨»¾¥»¾¢»½¤½¾£¼¿¥½¾¤½Á¤¸¾¥»Á¥»¼£¹»¤»Á¥»½£½¾¥º¾¢ÁÁ¢»½¡¾½¤¸À¨»½¢¼¾¢¹¾¥¾»¥º½¡¼À¦ºÀ¥º»¡¹¼£»¾£»Á£¾½£¾¾§½¿¦¿Á¨½¾£»¼£¼½¡¼Á§»Ã¦½¿£¾½¨»¿¤»¼¡º½£¹¾¥½¾¥»¸¡»¼¤¹¾§¸»¢¸½¢¸½£»¼¤»»§º¾ º½¤¸¾¥¸¾¢»½¤¹¿£¸½¨º¾¥ºÀ¢º½¢º¾¢º½¨¸¾¦¹¾½¾¨º½¢º½º¼¥º½¦º¾¦¾¾£·»¥»»¨¾¼¨º¾¦¸Á¤»¿§½½¥»º¦½¼£¹¾¦»¿¤»¼¥»¼¤·¾¤»½¡¹»¦¸»¥»¼£»½¨¹¸£º»¤¸¼¢¸½¤»¼¤»¼¢·¼¡»»¢¸º¢¸½¡¼º¡º·¢ºº¤¶»»¹ »½¥¹º£·»º¼¤¸»¤·¸¡¸¹¦·º¡ºº£¹»¶¸¹·£·¼¢¸µ¡¶¸µ¸¢¸»³¸ºº¹¸¡··¢·µ ¸¹³º·º¡·¶¡µ·¹¶¶¸µ³·¶²·¡·´£³µµµ¡´µ¡··³³¢µµ¶¶ ¸·³µ´·¢µ¶´´´´¶´³¶ ³´´·²· µ³ ¶³µµ³·²¸ ²·°³±³³¶³¶¶µ µ¶³· ³¶µ´²²³³¶³³·±³±³±²¯´°²³´°³°±°°®´²²°®®°¬³±³°³²¯¯´®³²±¯²±´°±°°¬²¯°¯¡¡ ¢¢ ¢£¡ ¢£¥¡¥¡ ¤ ¢ ¥¦¤§«¤¡¦¤¤¥¨¤¥¥¤¢§ £¤¦¦§ ¥£¥¤¢¨¡§ª§¢¥¨¡ª¤¢¦£ª¡¦ «¤¬¤ ¨¥«¡¦£ª ¦¥¨ «§©¢ª¤©¦¬¤¦¥§¢¬¤ª¥ª¤®¥¬¡«£­¢ª©¬¨©¦¬¢¨¦­§ª©¬¥­¥­¥®¬«¥¬¤¬¨¬¤­¢¬§­§¬§¬§¬¦®¥¬©¬¤®ª­¬®©­©­§­¨±¬¯ª¬§°«­©¬©¬§®¬¬¬®ª­¨°¦°¨±§±¬®®±©²¬¬¬°¬²¬¯¬³ª³«³¬²¬­¬­¬³­³ª³®³¬³°°«³¨²¬³®²ª²¬²­°«³±²¬±¬²¬³«°­²°³®²¬°­´®³­²¯·®·®µ¯´¯³®³±³­µ°²°µ°³²³®±¬µ¬³­·¯²­²ª¯«zufi_i_w`SuU[o[Yk[`ikdol`o__rYUkUWlUQdOO_DQ_OSbYWb``ib[iYSk`Yd_Ug[Si]SgWQfUWdb]ffYkdUn`]nbSf]OiWUkSK`SFgKMbSM`QIdWO`YQ_]Mi_Ylo[nufzkt¢|¬{·»¼¡À§Í©Ó®Ö³Õ³Ú ·à£µä£µà¨¹æ©¼é¬¼è¬Áê®½ì¬Àê«¾é§¾ê¤¼ç¢ºã¼á¹à¹Ü¶Ü·ÙµÙ·Úµß¶âµá¸å ·ã¢¼ß¢ºã£¸ã¡·à·Ó³Í·Ð´Ü¢¶ë¨»é¬¾ñ¯Ãô¯Áñ®Åò­Ãï²Âï­ÄëªÂé¬Âñ®Ãñ¬Ãó¯Åï®Ãõ¯Åù´ÌúµËø¸Êú¶ÉúµÎú¶Êú»Íú·Îú»Ðú¹Îú¹Íú·ÒúºÎú»Ðø¶Ðø¹Íõ´Íø¹Î÷³Ìú´Íù·Êù¶ÎöµÉö´Ìö´Ëö´Êô°Èï¬Æï©Æç§¾ã¡½â¥¼ã»×¶Ñ±Í®É°Á¥¶~§z¦tlg_|bw]z|_xf{x[zqSxnUqbWq]OqbSoYSi]Wk[OfUQfOSg]MfYQkOK`[[gSWkSOg][gOS`SKdSOfUObQSdWSfYYfQMi]UkbQfUOkSQdSObQMfMKbQO[MKbFK]QM]KQ_KK_KM[OF[OOdQO_US_OObQQbSSb`Ukb_kb]nkdorgxrx¬¤¤¥ ¨¦£«¡©¹µ¹¨µ»§º¿¬¿¾§Â¿©¾¾«½½¦Â¿«¾À¬Á½©Á¾¨¿¾«¿À¦À¿«Á¼­À¼¦À¼ª¿¿¬Á¼ªÂ»§¾¾«À½©ÁÀ¬¾¿¬Á¾«Á¾«ÂÀ¯Á¾¬Â¿©ÂÂ¬¿¾«¿¿¨Á¾§Ã¼¬¿ÁªÁÀ¨ÂÃ«¿¿¬Á¾¬Ã¾¬¾¾¬ÀÃ¬ÁÃ¬ÁÀ©¾¿§ÃÁ©¿¾ª¿¾¦¿¼¬¾¾©À¿¨¿¾«Á»¨¼À¬ÀÂª¿¾¤¾¾¬¿Á¯¿¾¯À¿¬Á½¬ÂÀ®¾Ã¯¿À®Â¾©ÁÁ¬ÃÁ«Â¾©ÃÀ­Â¿«Á¾¬ÀÁªÁ¿¬¾½¬Á»ª¿À«¿¿«Á¿¬¾¼«À¾©½¾ªÂ»¬Â¾ª¿¾¬¾Àª¿½¬À½¬¾¿¨½»­Â½¬¾¿«À½ªÀ½®¾½«Â¼ª¿½¬¿¾«À¾«Ã¿¯¾½©Á¾ª¿½§ÁÁ¯½¿ªÀÀ©¿¾¬Á»ª¿½¬À¾¬ÁÁ¬Â½­¿»¨¾¼¬ÃÀ«Á¾ªÁ¿«À½«Á¿¬¾Â¬¼¹­¾¾«»¾¬Á¹¬Á¿¬Á¼«¾¼¨½¼ª¿¾ªÀ¼©¿¾¬»¹¬¾¹©À»¬¼»¬¾¼­»¿¬Á¾«»»§¿»¨½¿¬º»¬½º¨¿¼¬º»ª»º§¾¸¬½º§¿º§½»ª¿º¦»¹¨»º¬½»ª¼»¤¾¹©º¹©»·¨¼¸¦¼¹§»¹¨ºº§½¼¨»·¦»¶¨·º¥¹¹¤º¹¥¼·©»·¨»»¥¼¶¥·¸¦¹¹¢¼¶ªºº¥¼³§»»§··¤¼µ¤»·£¸·¥¶µ¤º·¢ºµ©¹¸¦»¶¥¸µ¥·³§¹µ¥·¶¤¶¶¤·¶©¶·¤º·¤¸µ¤¹´¤¸¶¤¸µ¥¸¶¤¶µ¢»¶§··£¶·§¹¸¢¸µ¥»·§¶·¢¹³¥¹µ¥·±·³¥¶³£²µ¢¹³£µ·£µ²¤¸¶¡³³¢¹±¡·³ ³¶¡³²£´±³±¤´³¡µ¯£¶µ¡µ³¤´³³´¡¶³´²¢·±·²¢·¯¢µ   ¡  £¡ ¢¡ ¡¡  £¡¡¢ ¡ ¢¡¡¡¡£¡¢§¡ ¡¥£ £¢¢¥¥£¢¢¢£§ ¡¡¡£¡£¤£©£¥£¥ ¤¢¦¥¥¥¥¢¤¦¥¢¤¡¤¥¥£¥¤¤£§¥©¤¦¤¦¡¦¥¨¢¥£§¦§¦§¦¥§¦¨¨§£¦§§¨§¨§¨£§§«¥¨¥§©¥©©¨«§¦¨«¦¬§©©©ª­«¬ªª©¬§©©¬ª¬«®ª«¬­«¬¨¨©ª«¬¬«¨¬¨¬©¬©¨©¨¬©©¬©ª¬«¬ª¬¬ª®©¬¦¬¬¬¨­«®««¬­««¬¬®¬¬°¬°©¬«®ª°¬°¬¬¬­ª¬­®¬¬¬­¬°®¯¬®­®°°°±®®­«®°®®®¯¬¯¯²­­¬©£¤t`nYlYxfSo`KiQFd[D[`UdnUdlQlYKiYFgUF`UI]I?`M?WUIW]Kb_KbbKf]FbYQbdM__BdSKb[I]YD]_OdgQbdKg`Fd`I_W?`O?`MD[S:WODUS?Y]BWUD_WD[dKdrQkYxlz£q®x·¾ÃÊ£Ò¨Ö®Ü±Ö³Û´ä·æ¦ºé¤¸í«»í©¼î¬¾ï¬½ñ²Áï¬¾î¬¾ï¯Àï«Âì«¾ì§Àé¢¾ë¾ê ¸ë»æ»è¡½ç¢ºé¡¾ë£¾í©»ê¥¿ì§½é¥¼è ¾ë¡·ä·ØµÛ»â·ë¢¹ñª¼õ¬Áõ­Àõ®Äø±Ç÷¯Äò®Âï©½ì§Ãî¥Âñ©¾ô¬Á÷ªÅô¬Áø³Çú²Çú³Èú³Êø®Èú´Êú³Çú³Ìú·Ìú´Îú³Îú¶Íú¸Êú´Êú³Êú·ÌúµÊ÷°Êø¯Èù®Çú³Èø¯Çö°Æù´Êú±Èø±Æ÷¬Éø°Æö¯Åõ«Çó¦ÂîÁä½àºâ¡»æ¸Ý·Ø°Õ¬Ì«Á¥¼¡¾u±td[`W|Y{`zYz~StqSnqKogFokKgkIgdIfgFb[DbSD_UF[_O`SB]WD`UIYUF[QF_UFYW?[QDYYDU[I]UD][BYYI`[I``I`]K`UI`M?]ODYMB[QBWQ?SFBUF?UQBWI:SI=WM?QOBUMDUUIUQ?`Q?YSKY]KYYOb_SddYglYnqdot{©¨£|~¢¡µªµ®»¤¸¾£¸¼¢¼»£»¾¡»¾¡¸»¥½»¦»¾¢»½¢»¾¡¹»¢ºº¥¾¾§»À¦½º£¼½£»¾¦·½¥»½¹¹¡¹¾¥½»§¹½¡¼» »À£À½ª¼»¥»»§¾½¡½¾£½¸£¼¼£»Á§»¼ ¾¾¥»½¥¾À¢»¿¨»¾¡½»¥¾¾§»½§¾¾¦½º£¼¿¥»½¡»¾¦»¼£½¿¢¼À¤»¾¡»¾¢½»£·¾¥»»¡»¼§¾Á§¾¿©½»¥½¾£»½¥º¾¥¾À¥½¾§¸¾¦¾¾¤»À¦¼¾¨¾¾£¾À¦½¾£»º¤»¾§»½¥½½§º¼¦½½¦¾½£¼¾¤½½¤¾¾¥»À¥¸¾¡½»¥½½§»À¥½½£½¼¤»½§º¾¢»¾£»¸§¼º¥¼¾§»»¨»½£»¾¥À½©¼»¢½»£¹¾¦º¾¥¸»£»½§ºÀ¨¾»§»¾£»½£»½¦»»¥½¼§»¼¡¾¾¥ºº¦¼»¤»»§¸¹£¹¹¤»½¤»»¥»¼¦½»¢¹»¤»»¤»½¥¹¼¢·º£»¸£·»¦º¼¥»»¤º»¢¹»£»º£¹·¤·»¡¸¹¡¶½¤»»¥¹¹£¼¹¢¸¸¢···º£¹º£º¹·»¡µº¥¸·¡¹·¡·¼£¸¸¶·¢º¼ ·»¡´·¢··¡·¹·¸··¶¸·´¶·´´ ·´·´²µ²···´·µ·¢·µµµ··¡³·¢¶µ³º³´ µ·°·´µ·µ ±³ ³´µ·¡²µ³³³µ³·¡¶³¯´µµ²·´³²µ´³²µ··¡³µµ¶³¸£³·´³µ³ ®´³µ³µ²³¯¯²µ°³°¯¯³³²¬°±²°´°±°²²³±´²°°²°±¯±°³­°³²¯°¯°±¯°¯¬±°¡¡¤£¡§¤¢¤£¤¢¤£¥¤ ¡¤£¡¤¡¡¦¤¦£¤§¡¢¦¦¥¢ ¦ ¤ ¦§¦¥¡©¤© ¥£©ª ¨¥¨¤¨ ¦©¤¨¢¥¢¥ ª£¨¢¨¢«¢§§ ¨¡¤©¡©§¨£« © ©¤¨¤«¤ª¥¨¡ª¦¨¥ª¡«£¬¤©¥¬¥ª¥ª¨®¡ª§¨¥®¨§¥¬¡¬§¬¥«¥¬¦ª¢«¨¬§¬§­«¨¥®¨¬¨©¨­¥¬¨¬§±§­©°¦­¦®¨±§¯¤®¨¬§¬ª´ª¬¨°ª²¬®©¬¨¯ª®¬¯¬³©°«­¬¯©±¬°¬±¬®ª±«®¬±­®­³©±¯¯©­ª²¬°¬²¬´¬°«°¬³­¶®¯¬²¬³±³¬³¬²¬³¬²¬µ®°°±¬³¯³ª³­³­³®³±³®±®µ­³¯´®´²µ¯µ¬³²´®¡³¬´­µ¬³­´¬³­¬«£ooki_|kbz`Wu_UoSSi]Ug__no_od[o`SkWQnYSiUOdMMgOQ`]Ud]Wi`Wi_[k_Ui_]ii`l`SiUUn`Uf`WqdUof[ndYk]OoSOd[MiSOd]MbWOdSMgWKgSSgUOi`Ul~duox¬·Ä Ã¤Ì¬Ö²Ü£´ã¦µä£»æª¾í«¾ëªÂï®Âñ³Æò²Åð´Çò³Æô³Æõ³Èõ´ÆóµÉõ²Çö±Ìô±Êñ¯Æõ°Åñ¬Äò¥Ãò­Æó¬Èõ°Èö±Çõ³Ê÷°Ëø¯Êö²Çõ¯Êõ±Ãõ³Æð¥Ãç§¿ß¢Ãã¥ÁíªÂ÷³ÄøµÊú¸Êú¹Íú´Ëú·Ìù·Ëö³Íô°Êñ°Æñ±Èô±Æú³Éú³Ëø¶Ðú´ËúºÎú»Ðú»Ðú¹Îú¹Ñú¹Òú½Òú»Õú½Òú»Óú»Õú¼Õú¼Ïú»Òú»Ñú¸Ðú¶Íø´Ðú³Ðú´Êú´Ðú·Ìú»ÐúºÍú¹Íú·Ñú´Îù³Ìø¶Îù·Ñö¯Ëô«Êí§Æí¨Âæ¬¿è¡¿ç§Àæ¡»â »Ö·Ç³Æ¬Ê©Ã¤µ{¡¢rgiiolb_~z_x[|o[xo`urYwu[tnSr`Qo_Mi_[i`Qi[Mg_SfYOgQMfSM]WQfUKgUO`WOf[WfYYdbSl]Si]_liYi[QoUMlSKbOIiSK]QK]MMdMF]KM`KD_OO_IM]MI[MObSS`QMbOFbUSdWSfSSf_`fd_ld]ooguwo§¬¥ ª¡¤¡¨§­¬·£³½«¹¾¬¼»«¿¼ª¿¼¨Â¿¨Á¿ªÂÁ«ÁÁ«Á»§Á¾©½¼¨¾¼¨ÁÀ­¾½¬Â¿¬Â¾©À¼¨¾½¥¿¾©¾¼¬Á¼§Á»«Á¼©ÁÁªÄ»¬Â¾©Á¾¬À¾­Á¿¨Á¼¬Á¾«¿Á¬Á¿«Ã¾ªÂ¾¬¿Á¨Â»ªÂ¿«¾ÁªÁ¾¬ÃÀªÁ¾©Ã¼¬Ã¾¨ÀÁ¬¿¾¤À¿©¾Á¬¿ÁªÀ¼¨½½¬À¾ªÃ½«À¼ªÁ¾¦¿Ã­Ã¾­À¾ª¿½¬ÂÁª¿À¬¿¿©ÂÂ¬Á¾ªÀ¿§ÀÀªÁÁ¯Â¾ª¾¿¬ÂÁ­¾Á¬Â¾¨À¾ª¿Àª¿À©½½ªÁÁªÁ½¬»¼¬ÁÂ¬ÂÀ¬ÂÁ¬ÁÁ®Â¿­Â½®ÁÁ¨Á¿ªÆ¼¬½¾¬À½¬¿À¬ÀÀ¬À»©Ã¿¨¾À¬¾¼­Á¾«¾Á«¼¼¬À¾¬¾½¬¾½§ÂÁª¼Á¬Á½¬Á»¦¿½«¿¼«»¾¥¿¾ª½À¬Á¾¬Á¿¬¿»¨À¼¬À½¬¿¼¬¼½©À»¬¾À«¿½©½¼§¾»­¼¼©¼¼«Â½ª¾º¨¾½§¾»¬½»ª»»ªÃ½©¾»¨½º§À¾ª¼º¥¿»©½¸©»¾¬À·©¼¾ªÀ¼«¿¾¦¼¼¬Á¼«½»¦»»§¾¼ª¼¹£¾»¤»¾§»¸¨½·¤¼¹§»º§»¹¨»¹¦¹¸¤¹¶¦¾»§¹¸£º·¦½»¥¹·¦»¶§¸¹¤»¹¦¸¹¤º´ ·´¨»º¦»¶§¶·¥½»£»¸¤»·¥»¹¨º·¦¹·©¶·§»¶¤¹·¦··¢¶·¡¸·¢·¶¥¾¶¢¹¶¨¹¹£¸´¡··¤¶·¡·³ ··©µ³¤·¸¦¹´¡·¸¤º¶¤»¶¥º¹¤¸µ¢·¶¥·¶¥µµ¥¶µ¤¹³¤¶¸¢¸¯¶¶¡³³·³¤·²¶²¡µ° µ±¡¶³ ²³´³¡´·¥´´³²¡³³³³¶±¶³¡·²¤µµ³´¤´´¡¸³¡·±¡³³ ´¡¡  ¢¢¡  £¡¡¢¢££¢¤£¤£¡¥¢££¢§£¢ ¢¤¡¤¦¢¥££¡¢¤¢££ ¤£¥¢¥¥¥¤§¡© ££¦¢¥ ¤¤¨¤¦¢¥¤¨¢§£¥¥¦¡§¢§§¤£¦£§¤¦¦§¥¨§££§¥¨§¨¥©¥¨¤§¨ª£§§¨©©§©£¨¨ª¬«¥ª©ª¦«§¨©©©§§ª«ª§ª¦¬ª¬­©«¬«ª§««®©«§«§¬®¬§«§«¨¬¬­«¬©«ª¬¨¬ª«««©¬©­ª©ª­«©¬«ª¯©¬¬¬­­¬°«¬¯¬¬®­­¬¬«¬¬¬©¬®®«®°¯°®¯¯­­­®«­®¯¯®­¬­®°¬ª°±¬¬­­¯§®¬¨§¬znt`k[zoUrdQn[IgYI`YBdUQ`fQgiQgdQgdIgYMdYF]QBYOF[QIY]KY_I_]FbYKddQb_If_Od]O]`Fd]O_bK`fQidK``IdWI_QBbUIW]F]WF_YF[Q?YM?_UDWiOdzWogw r³z¾ÈÊ¥Ö­Ú­á¡²æ·è§»ç©½í§»î®Âñ¬Áò©Âò¬Âñ¬Ãó¬Åñ®Âó­Ãõ¬Ã÷­Æõ«ÆóªÃô¬Æõ¬Æõ¬Æ÷©Äõ©Èù©È÷«Å÷°Çö¬Åú°Êù±Êú±Ç÷²Êú³Çù¯Åö¬Ãï©Ãæ£Ää¤¾ç§¾õ®Àú³Ãú¸ÊúµÊú±ÈúµÊúµÈö®Èô¬Æñ©Èï«Çõ®Ä÷¯Äú°Éú³Ê÷³Éú³ÌúµÍúµÏú´ÏúµÌú¸ÍúµÍú´Ïú¸Ìú¸Òú¹Òú·ÏúºÒúµÍú¹ÌúµÌú´Îú³Ëú±Ëø±Ëú°Èú³Ìú°Ìú³Éú²Ìú²Ëú²Íú²Êú°Ëù®Êù°Èö¯Æö¬Èö®Æð¨Ãí¤Àê¤¾ç¥¼ç¾ä ¶â ¸ß¸Ò³È¬Ë§Ç¦Å¡·t¬ld`llf_]|Uu|WxxSqYt{Yq|UrnQnfIg`Fg`Dd_Bb[D_UI_UB`Q=]OD[UDUWIYWIYUI]bM_`Q``Kd]MbfQg_IgMDbUF]WB]FF[QBSM?UK?UF=UK?WI5UI?UF?UK?[K?OSMYQB[S?[SFbUId`O`_UbbUg`Qql]q|n{ª© | |¡³ ®¹¡³½£¶»£»»£»¼¥º¾¤»¾¡¼¾ ½º¥º¼¡»¾»»¦»¼¡½¿£»¾¥¼½¥»»£»À¥»¸¦º»¸»¤»¾ ¸¼¥¼¿¢»»¢»¼¤»½¢»½¥»¹§º»£»½¢¼º¥·¾¢½¾¦½¾¥º¾£»¾¨¾¾¥»»¡º¾¦¾¼«»Á£¼½¥¼½¥¼¾¤¾½¤»¿¢»»¢¾»¤º¾¦»½¥À½¥¼¿¡¾º¥»»¡º¾£»½¢»¼½Á¤»¾¥Á½«¾¿¤»Á¥»»©»¾¦¾À£¾¾¥¼¾¦»¾£¾½§»¾§¼¾«¾½¥½À¤»Á§¼½¢¾¾§ºÁ¥¿»¥º¾£¾½§»½¦¼»¢»¾¦¾¾¥º½¦»À¤¸¼¥¾¿§»½¥½¼¨º½£¾¾¤¼À«½¿¥¼½§¹¾¤½½¢¼»§»¾¥»º£»¿¦º½£¹¿£»»¨»½§½»¢¸¾£¾»¦º¼¢¼¾¥¾¾¤¹º£¼½¥»½£»»¡¼½¡º»¥»¾£»»¢¸·¢·½©»¹¤¸½¤¸¼¦º¹¡»»¤·¹¢º¼£º¸¡¹½¢¹¼¤»º¥º½¤¸¼£··º»£³½¦»º£¸½¤¸»£º¸ º½¥¸»£µ¸ ¹½¦º»¢·· »¹ µ»¢¸º ¸¹¶¸¢·µ ¶¹¦·µ´¹¶·¡³»¢µ·¡¶³¢¸¸¸·¢¸¶¡±¶ µ·´··· ³¸ µ·³¹¡µ¶¡³µ³µ¥µ·µ¸¶µ¡±¶³·´´³· ³¸ ¶²³µ´³²´ ³¹¡µµ·µ³µ´³³´µ³¬µ³µ±³´¶¡³´ ²³¡±¶¡µµ²³µ³µ²³³²µ³µµ°³±®°²²¯²°­°³¬³±°±±¯³°³²²±²®±°³²µ°±°´²³°³®® ¯³³¶±°²²®³°  ¤ ¥¤ ¤¡¤£¡ ¢ ¢¤¤¢¦ ¢ ¤¤¡¦££¥¦¤¢§£££ ¥¢¥¨¢¥¤¥¨ ¦ª£¤¥¨¡¦ §¡¦¤©¡¨§¢ª¤©¨¤§¥ª ª ¬£ª¤«¡© «¬¦¥£©¤¨¤¬ ©¤«¤¬¥©§«­¤¥¢ª£«¥©¨¬¤­¤¨¨¬¦®¥«§¬§¬¢¬¥¬¥©¥®¨¬©¯¨¯¥¬ª¬¤­ª¬¦­¨¬¦¬§¬¥®¦ª©­¨®§©¨®©³¨¯¬®©±¥¬¬­©°©¯¬¯ª®§²ª²¬¯¦¯«³¬°¬³¬­©°ª±¬²¨²«³¬±ª¬¬±¬³«­ª³­±¬³¬¯§³­±ª°©³¬­¬´®³­±©´¬²®°¯µ¬´ª±°´ª²¬³¯³¬´¯±©°²²¯µ­³¯¶°¶³³°´®³²µ°µ­³®³®´­³®²®³­¸®³ª¯«{ nqdldn[{_UxSOoYUiUQf[_ni]n``ogYtb[nYWi[KkUMfQMbUOb_Qd[SbYSn_[ng_kkQn_[nd]fgQob]lbSkiYn`Oo[Oi]OkKFdWMb[SdYQdSKbKDdSKig[lgxt|«~·¾¡Ê¦Ó®Ú¶â§·ç¬½î¬Áï®Åñ±Åñ¯Æõ´Èõ·Çô³Éó±Éô³Çó²Èð¬Ìò²È÷²Ì÷µÌö²È÷´Íö°Îö³Çõ±Ì÷³Íú´Ì÷³Ïú±Ñú³Îú·Òú·Òú·Òú·Ðú·Òú»Ñú¶Íú¶Êó®Íî­Ìë¯Ëó±Èú¸Îú¾Ìú¸Ñú»Îú¼Òú·Ðú¸ÒúµÍö®Êó³Ìõ±Êú±Ìú¾Îú½Îú¼Òú¹Ñú»Óú¸Óú¹Óú¼ÒúºÒúºÔú¼Õú½Ôú¿Ôú¾Óúº×ú¿Öú»Öú¹Ôú¶ÓúºÒú¹Óú·Ðú¹Ïú³ÏúµÒú´Ïú¹Ñú¶Ðú¶Ïú·Ñú¶Ðú¼Óú¸Ðú·Òú·Ñú·Ñø·Ðú³Îù°Íõ­Êô­Ìò­Æð«Äí¥Æê¦Áç¥Áä¼ß»Ô¶Ð²Ç¬Ê¨È§·~£¬wnu{¥wwodbi~d|gg~]{x[{qUqdUo[MqbQi[UiUInSM_SKiOM`SO`SQgWSkYSd`UidWob[qb]lkQnUOn]QgWMlOMiSKbOKdOFbMBbKI_K?`IF_MM[FKgMO]QO`UKfSMdQSlYQi[Qf[[if]o`_ribuug¤¬ ¤ª¤¦¨z£´¡¬º¤´½ª¾À¦¼¿ªÁ»¦Á½¬¿¿§Á¾ª¿¾¬À¾¥Á½¬À¾¬Á¿¨Á¾¦¿¿©¿¾¦Â¼«¾À¨¾¼¥º¼¥»¿«À¼§¿¼§ÀÀ¬À¾©Á¼¦Á¾¨Ä¿®¿¾¦Á¾§À¿¨¾¾¬ÃÀ¬Ã¼¦Á¾©Ã¾§Á¾ªÁ¾¬À½¦ÀÀ¨À¾¬¿Á¬ÂÀ¨À»«¿½¦¾¿¦¿¾«¾¼«Ã¿«ÀÀ©À¼«Á¿¬À¿©À»§ÁÀ¦½¿¬¿¾©Ã¾§ÁÁ­¿¿ªÃ¿¨¿Å©Á½§À¾®ÂÀ«Á¼ªÁÁ«¾Ã®Â¿¨ÀÁªÂ¾©¾Á®Ä¾¨Á½©¾»©ÁÀ¬Á¿®Ã¿¨Á½©ÁÀ¬ÁÂ¬Á¾«¿Â¥¿Á¬¿¾©À¿«¾½ªÃ½¬ÃÁ¬¿¾¨À¼«Á½ª¿½®À¿¬Á¾©¿Á¬Á¾§¿¼§¼¿¬Á¿«¾»¨¾¾ª¾¾«À¾¬¾Á¬Â½§Á»©Á¾§À¼¬Á¾§¿»¬¾¾¬¾½¬Ã¼¨¾½©¾¾©Á¿§¾¹¨»¾¨½½¨½»¨¾¿§¼¾©¾¾¨À¾§Àº¦¾¹§»¸¨¾¼«Á»¨À¾¥»¼§»½ª¿¼¨¾»¥½¼¥¾»¬¼»ª¾º©¿Á§¾»¦¼¹ª¾¼¥º¹¨½»¨À»§¼º©½¶©»½§º»©»·¦»º¤¼¼¦½¸¦½»¨½·¥»¹¢½»¤¼µ¦¹·¥¹¹¦½¹¢ºµ¤»»¢¼»¤·¹¦½´£»¸¦¸·¡»´¢··¢·¶¤¹¶¥¹¶¤¹³£º·¥¼·¸¶¨»¶£··¤¹¸£º·¤º´§¸·¤¸¹¤¸³¢¶¹¥µµ¨¹¸¤¹³¤·´¢µµ¤·µ¦·¶¦¹´¥¶´¢·¸¥º³¤»µ¥¶´¤¹· ¼´¢¸¹§·µ¡¸·£¸´¹³¡º³¢¶µ¤¶¶¢¹°´µ µ³ µµ£¸³³² »µ ·³¤µ´¡µ´£¸¶¢µ³¤·³¡³·¥µ´¥»³·¶£·³¤³´¶³ ¶µ³³ ·³¢µ³·  ¡¡£ ¡¡¢¡¡ ¡¡ ¡¤¢¡£¡¡¡¥  £¡¤¤§ ¢¡¥¢ ££¡¥£¢¡¤¥¡¡££¤¤¤£ ¥£¥¢¢ ¥ ¥§£ §¡§¥£¥§£§¥£££©¦¦¢§£¦¢£¦¥¢¦¢¨£¦¦©¥©¨¦§©¤©£§¤¨¤¦§£§§£§«©¥©§¬§¥¦«¨ª¥§¥ª¨ª©«¨ªª¬¬«ª§©­¬©©¨©«©«©¬¬¬§ª«ª©ª©ªª®©«ª«¬«¬¬¦¬ª®¬¬ª¬¨­¬««®««¬©§°©¨«¬«¯¬®®¬®®®¯¬¬¬¬¬¯«­¬®­­¬¬¬­«¬­²¬°«°¯¬­¬®°°¯«¯®®®¬°¯ª®¬®®¯©¬«ª§§|gw[lW{n[tfOn[KiSIfWF][Q][W_kQg`Qg]OgfM`_Mb[BbID`KMUWK_`K]`Q]WMf_O_dWdgOdYMdgS`gQidQgfM`_I_UI`S?YWDYSB_[IUYD_IB[O?SUI]dOd`nr{«|ºÁÍ¦Ò¬Ü°ã ·è¨½î©¹ð­Áð¬Âñ°Æò°Äò¬Ãó°Åò®Äò¬Äó­Åõ¬Äõ­Æõ¯Çö¯Æö¬Èô­Éô¬ÅóªÄ÷­Çú­Èú±Ìú²Êú¯ÊúµÌú·Ìú´ÈúµÐú¸Òú·Ïú¶Îú²Îù­Ëí¬Êé©Èô¬Èú³Èú·Ëú¸Ðú¹Ìú¸Íú¸Îú³Íú¯Ì÷°Ìö«Éô¬Çö¬ÆúµËú·Ëú¸Ìú¶Ïú·Îú¶Ðú¸Îú·Ðú·ÒúµÐú·Òú·Òú·Òú»Òú¸Òú¹Óú¸Óú·Ôú¸Óú¶ÏúµÐúµÏú¶ÏúµÎú±ÎúµÌú·Íú²Îú²Ïú¶Ðú²Îú³Ðú³Ïú¯Ïú´Ðú·Îú´ÏúµÊú´Ìù²Êø­Ìö¯Æó«ÈòªÁó©Äî¤Âë¢¾æ¤ºä »á¹Û´Ò³Ð¯Î©Æ¥¿¡»u°olu¤u£tog``f{`{d{]z[zuUqtQliFkdFf_KkY?bUD[YDYM=YI:WQI[WFYQD`YK][QfdOk]QdgKg]Id]DbWD_SF[M?[SDYQBUIDUMFSOBUI?QM:SM?[F=UOFQSDYOD][F`SD]UM`WK`bUddUl`Ylq]nxn{©ª¢¥ u£«¢·±»¡µ»£º¼£·½¤»»£½¾£»¾£½½£»À¥»¾ »»¥»½¥»½£»¼£»»¢¸¼¥½¼¸»£·»¡»»»¾£¸¾¢»¼£¹º£¹»¹¼¢¹½¨»½¥º¾¡½»£½¾¦¾»¥¿»¤·Á¦½¼¡»»¢¹¾¡»»§¼¾¨¼¼¦¹¾£¼½¡¹¾¦¼¾¤¸¿¤½¾§º»¨½»¡½À¥½¿¤¼º£º¾§·½¡»»¥º»§¸¾£½À¤¾À¨¹¼¦¸º¥½Á¦¼½¤»¼£¼¼¤»¾©»¾¦»»§»½¨¼¾¢¼¾¦À»¦½»¨»¾¥º¾§¼¾¥¾¼¥¾¾©¼À§»½¦½»¤¹¿£½»¢»¿¥¸½¨¼¾£¾¾¥¾¼¦»¾¥½»¥¼¾¦º»¦º½§¹»¤»¿§¼¼¥º¾¤ºÁ£¼¿©»¾¦¼¾§»»¤º½¥¹»£ºº§º½©½½¥»¹¤¹»¡ºÀ§»½¡»»¸º¥¸¼¡¼¼¤¸»¤¸»¤»¼¦º»£¹»¡¹»¢º¾§»¿¥¹»¥»¸£·½¦·½£¹º£·º£º»¥¸º¢¹»£»¹£»½§¶»¢»¸£»º£·»¢¹»¤¸»¤·»£¹» ¸¹¢·º¡·¸¢º¹¢º¹ µ¸¥·¹¢¸º¡µº£·¶£·¹¶º µ¸··¡¶· ¸·µ¸ µ¸¡³·µµ¡µ¶¡µµ ´µ¤·»£¶µ µ·µ³³µµ···¢³³³´ ·· ³¶¥´³³¸´·µ¶³µµ¶··³²¢¶¶¡±³¸´³µ²·¸¶´¶ ²³²³²²µ³²´ ´¶²¶³¶³µ¡³¶³·´´²´±´²´ ±´´³²¯±´¯±´°²³®´¡³´³¯ ²³´´²²³²±³µ·°²±³²²®²±±³´¯²®³²³®²®±³³ ®¥£¡¤§¡ ££ £¡¢¡¡¤£¢¡¢¥£¤¢¦¤¨¤§¤§¦ ¦¦¦¥¥¤§¥ ¨§¢¤£¨ ª¦§¥©¥ª¢¥¨ §¥¤¡¤ª ¦¨¡¨¢«£¨¥¡§£¥ © ©¢©¢«©©¢ª£§§¬¡§ «£¬¤¬¦¬¢ª¢¨£«§¬£¬¦¨¤®£§¥«¦­¦§¦¬ª«¨¬§¬¦ª¥ªªª¢­¦­¥¬¦®§¯§¬§­§¬¦­¦®§­¨¬¨±¨¯¬ª¬®§°­­§°ª¯©¯¨°¨±¨°©¯«°¨®¬°ª®¬¯©°¬³­¯ª³¬±¬³ª±­²ª°©¯ª±­²¨®­°¨³®³¬±¬±­²«³¬³¬°±³¬°¬³¬¯¯´¬´ª¯«µ°³­²«²¯²±µ¯³©±¬±­¶¬µ±²®´¯´®²°µ­µ±°°´®³¯´³³®´®³¬±©±¬­ §|¤nufl`idxgWz]StQKnYOf[[kW_gq[o`[q`Qog[n]Ql[MkKFnQSf`Sb_Wib]i[YqdWibYi_Sl`Snb[oiUtbYoiWn]KiUIlSBdYSgWFgYIbQKfKDgWIddSl{iww|®¶Ä£Ð§Ö±â¡¸é«¼ì¬Àï¯Ãò³Ãô³Èö³Ìö¶Ìö³Ë÷±Íö²Êö¯Îõ°Ê÷³Ìú´Ëö®Ìö±Íø·Ì÷³Ïö²ÍúµÑúµÐú¸Óú¸Òú´Òú»Õúº×ú»Öú¼Öú»Óú¼Úú»×ú½Õú¶ÒúµÒí²Ñó±Îú·Ñú¾Òú»Õú¾Õú¿Óú¿Ñú¼Óú·Òú³Ñø°Ðö­Îö³ÊúºÐú½Îú¾Óú¼Óú¾Õú¾Õú»Õú½Õú½ÖúÀÖú»Öú»Úú½Õú¹×úºÕú»Øú¿Ùú¾Ùú¼Öú»Öú¾Öúº×ú¸Õú¼Óú¹Õú·Õú¶ÔúºÒú¸Õú¸ÕúºÔú¶Ôú·Óú¹Óú¶Ðú·Óú·ÐúºÑúµÐú·ÑúµÓùµÐù²Îø²Ì÷³Ëö²Êô¬Èò¬Æï©Æï¨Æë§Âã ¿ã»Û»Ó³Õ³Ð¯¿¥Á§¶|¡¬w|w¥wªz¢ulgkilllf[tUzkSrfQqgFl[QnYKiYDdOIgQIgUKb[OlYMf[UigWld]llWndQq_MnUQkQMgMDdSFdWIiFIbOObOB_KK`MK`OMgFD_UO_SFkOKdUKbQKgUQfSSibWkdWob[tlbqwn¨¬¤««¢¥©|¢¤´¦±»¦·¼¥»º¨»»¨Á¼§¿»¥¿¿§ÁÁ¥Á¾§Áº¦À¾©Á¾¥À¼§Á¿§Á¾¨À¼¦Á¾¦Á¾¤Á¾§À»¦Á½¦Á½©Á»¦½À­Á¿¨¾¾§Â¾¨¾¾©Á¼¨À¿¨ÁÁ§Á¼¨Á¼¦À¾ªÄ½¤À¿¬¿¿«¿½©Ã¿©Ã¾§Á¾§Á¼§¿Ã§Â¼«Á¿ªÂÃ«Á¾¦À¾¦Á¿¬Á¿¨¿¿ªÃ¿©¼¿«Á¾©ÁÁªÂÁ©¿»§Á¿§¾ÀªÁ½¦À¾¨¿¿«¾¾©Á¾«ÁÁ§Á½§ÁÁ§Á¿©À¿ªÅ¾¨¿ÀªÁÁ©À¼¬¾À¨½¾©Á¾¬ÁÁªÂÁ¬Á¿¬À¿¬Â¿©Á¼¥ÁÁ¬¾¾¬Ã¾¦Á¿¨¾Á¨¿¿©Á»¨Á¿ªÁ¾«Ã½¬Ã¾§¾½¨Á¾¬Á¾ªÂ¼©À¿ªÀÀ¬Á¾©Á½¬ÃÀ¬½À¦Á¿¬Á¼ªÀ¾©¾¾©Á¾©½¾«¿»¨Á¾§¾¼¨À»§À¾¦¾½¨À½¬À¼ª¿»«À½¨¼À§½¼¬À¸¥¾½«¾»©¿¼¨¾¹¥½¾ªÁ»¨½¿§¿º¦À¿¦½»£Âº©À»¥¾º¦½¼¨»¼¤»»¤¾»ª¾¼¥Á»§¾¼¥½»¨¾º¥½»¤¿¸§½»¦¿¹¢¸¼¦¼·¨»»§»º¤·¹¦»·¡º¼¦»»¨»¸£¼¸¦½»¢»¶¤º¹ ¹·¦¹¶¤»º£»µ¡ºµ¡ºº¤¹·¤¸µ£¹·¤»¹§·¸£»¹¢¹·¥»»¦»·¡¹µ¢··¦¸¹¤¶³¨¸µ¡¹³¡·¶¡¸¶¡·´£»· ¸·¥»´¤»³¥¸¹£¸³£·µ¡¶¶ ·· µµ·µ¥»µ¡»³¡·¹¤º´¥¹·¦º´¡··£·³¡·³¢º´¤¹µ¶´µ´¢³³¢·µ ··¡¹³ ·³£¸¸£¹µ¡¶³·³¡¹· ¹³£·¶¢·µ¤¹³³µ¡¹³¡·´¤·³¢´¯ ¸²¢¸´¢¶´ µ¶·³¤µ ¡  ¡  ¡¡£ ¡ ¢¤¡¡¢£¢¤ ¥¤¡ ¤¡¡¢¡¡¡¢¢¤¢ © ¤£¤¢¤¢¡££¡£¤¥¥§¤¤£¡¤£¥¡¤£©¤¥£¨¦¢£§¨¤£§£§¥¤¦¦£§¦¥©¦£¦§§¨§¥¬¨¨¥¦¢©¦©§©¦§¦¤§ª¥¥§ª¦¦£«¦¨¨­©¨¤¨¨¬©¬£¬©©©«¨«§¨¨©«©¨ª­¬ªª««§©§©¬¬«§«¬©®«§©«¬®««©«««§«¬«©°««ª««¬¬ª¬®®®ª¬««¬­ª¬¬«©­¬¬¯¬¨­­©«®¬¬«¬°«ª®¬««­¬¬¯¯®¬®®«®®­¬­««¬¬¯¯¬®¬±¬«®®«®¬«¢§¢txbqSg]tnWrdSqYMf[M`QK][I_[O`gQf_QdfMg]Qf_OfYK]IB`UK[_Q`[Qb_Q`_Ub_Od[Kf]O``I_`UfiQblIi[IdWI[W=_QD_UBYS?YK:YM?SSB]`M`ubknw¥z¶ÆÍ¡Ó«ß±é¤·ì¨¼í¬Àó­Áó²Äô¯Æò±Åó°Éö³Åö®Çô®Ç÷µÈõ³Çõ®Èö±É÷²Êõ«Ä÷°Éø²Êú²Ìú·Èú¸Îú¹Òú»Ñú»Ðú¸Ðú»Òú¸Óú¹Öú¹Óú¹Óú»ÓúµÐø®Îé¬Î÷²Ìú·Êú¹Ñú¼Ïú¾Ñú¾ÒúºÐú¹Îú²Ìú²Íú­Êô¬Èù¯ÊúµÌú¸Íú·Îú¸ÒúºÎúµÑú»Òú¼Òú»Ôú¹ÔúºÒú»Õú·Óú¸Óú·Ôú¶Óú¼Õú»Öú¹Ôú¼ÓúºÒú¸ÓúºÒúºÔúºÒú¸Ñú·Ðú´Óú·Ôú¸Ðú¸Îú·Ïú·Ïú·Ðú¶Ìú·ÐúµÐú³ÍúµÎú·Îú´Ïú²ÊúµËù²Êù®Èõ°Çò«Èõ¯Èó¬Æî¨Åñ©Ãí£Áé¢Àá½Ü¹Õ´Ø®Ô®Ê©Á¤Ä¡¶t«qzuªu¥riidkgfi|g]|[ztItoOnfKl]Fi]FfYFY]F_Q?]UIY[B`WId]Q__Od`Sgg[goQd`IkUF`YD]SF`QD[WD]IB_M=UMDQM?YSD]Q?WDBWM?YUF[SFUOI`SFYWK_WI[WU``SfdOgdWkt`r~k~§«¥££¡~£®¢·¡±»¥³· µ½¤º»¥»½¢º½£½½¥»½¦¼¼§¿»¡»¾¥¹¿£¼½¤»½¦¹½¤»º¤¼¼£º»¦»»£¹¼£»¼£»¾£½¾¥¼¾¨»½¥¼»¦½¾§»¾¥¾½¥»¼§½º§¾À£»½£º¾¨»¿§¼¸£¾½¦»¼£»¼¤»¾©»»¤»À¥»¾¤»¾¦¾º¬¿¾£¾¾¤¾½¦½½§»½§¾»¦»»¥¾»¥º½¨»¾¤ºÁ¦½»£»À¨»¾¡»¼§»¾¤¼¾¤¼¼¤½¾¨»½¥»¿¥º¿¥»¾¥¼À£½¾©¸¿¤º¾¥»À¥º·¦¹¾¤»½©»¾¥½½¦¾¼¥»¾¦º½¥ÁÀ§¼½¨¸½£¿¾¦¿¼£¸¾¤»¾¤ºÁ¥º»¦»½¦»¾£º½§¹º¥¹½£¹¿©»¼¥»¾§¹¾£¹½¥¸¸¢º½§¹½¥»»¡»½¤·¸£»»£»À£¹½£¼½¦»¾§º¿¤»»¤»¾£·»¥»»§º¼¨ºº¤·»£º½£¸¼¥»»¦»»£º½ »¹¢¸½£»¹£º½¤»»¦º½¦¸½¨·¾£º»£·¸ ·º¢¹¼¦¸¶¹º£···»¤µ¹¡·¹¤¸º¢·¸¥º¹¤¶¹¢·¹¶·¦··£¹º¢º·¢³¼£····¢¸·¢µ» ··¢·º¡µ·µº¶º³¹ ²¶¡³·´¸¡µ·¡µ´ ´¸ ³¸¶´ ²·µ· ²´¢³¶¡·¸··µ´¡³²´³¯·²µµ´²³¡³¸´µ µ´ ²µ µ´µ¸¢¶´³µ³·µ³³²·µ²´ ´µ³³°·¡³´¶³¡µµ±³³µ¡´·±±µ´³³°³±°²³±· ³³´´ ²³°¶²´ ³´¯¶´·¡³³°´°³±²¡¬²¡³°¯±³³²²±²±²²²¡²¢¢¢£ ¡££¤ §£ £¡¤¢¢¥¤¡ £¦¢¡§¥£§¦£¦¦¢ ¥¦£ ¢¥§¡£¥£¤ ¥ ¦¨¤¢§ © ¥£©£§¦ ¤¤©¢§£©¢§©¤¬¢©¡¨£§ ¬£« ¨£¬¢¬¤§¤¬¡©£¬¤¬¡¬¦®¨¬¡¬¤¨¡«¤«¥®ª¬¥¬§¬¦©£«¤¬¤¬«°¡°§¬¨¬¤¬§®¦¬¤¬©¯§®¤«¦¬¨­¦¬§¬©­¦¯¦¬©¬¨²ª®®­¨®¢±§­¦²ª¯¨­¦±©®ª°©°¬²¬°¬°¨¯­°¥­©°©²¬°«±«³¬²¬²­³¬®«³¬°¬±­³¬¯«±ª²«²¬µ¬¯¬³ª³®³¬³ª¯°²¬´°³­°¬·¬³¯³¬³¬´¯¶¯³­±¬´®´®³¯¶¬²°³¬µ¬³¬³¯³®³¬°¬³¨° ª¤oufu`nboW|UQuWQi[OkQOgWYgbUi][o][nfQl]Wl_OlOKgDQdUUigWk_Ok]Si_[tYOi[QnYUf_Ql_Wkd[kiWq[KoWQdUMfSFd[KfQD`FD`WO`]Ogo]koz¨{³ÇÊ¥×°à¡´èªºì®Âð±Æó³Æô°Éó´Ìõ¶È÷µÊö³Î÷³Ì÷³Ëö°Ìö·Êø´Ëö³Îø³Íø³Ìú²Ïú·Òú¹Ïú·Ñú¼Õú¿Öú¿Ôú¼ÙúÂØúÀ×úÀÙú¾Øú½ÛúÀÚú¾Ùú·Öú´Õö¶ÓúµÑú¿ÖúÂÕúÅÙúÁÖúÁÕú¿×ú¹Öú¶Õú·Òú·Óú¸Ñú¸Òú¼Òú¼ÔúÀÕú¾ÕúÀ×ú¼Õú¼Úú¿Úú¿Øú¾Úú¼ÛúÁ×úºÙú·×ú»Üú½Øú½Ûú¾Öú»×ú¿ØúÀ×ú¾Ûú¼ØúºØú¿×ú½×ú»×ú¼Õú·Øú»Öú»Óú¾Ùú»Öú»ÓúºÕú¹Öú¾Öú·Òú¸Õú»Õú¶ÒúµÓú»Òú´Íù³ÎúµË÷³Ðø°Íö²Êõ²Éõ³Ìó±Êð­Æì¥Æì¢ÃåÀÖ»Ù¶Ø³Ò³Ë¯Ç¬¿¬¹x¤«{|¬¯|¢onkqllukkd~[{[{rUudOt]OndQi]MoYKkYOiUKg_Kf]Ug_Un_Uri_ni]lbQoOMiSIiQMiMF_UI`MFfOD]FKdIK`OM`FD[MF_KDdQO_SObOFfWOgUKgYOi[[i][l]Wqd_onlxu¡ª§©¬¤¤©¡¦©· ³¸¤»»¦»½¨¼»¢¿½¦¾¾¥¾¾¨Á½©À»§À»¤¿¾¨Á¾¤ÀÀ¥½À¨À¿§½¾§¿»¦À¼§À½§Á¼¦¾½ª¾¾¤Â¾¨¾»©¾»«Á¾£Â¾§Á»¨Ã¿¨ÁÁ©Á¼¨Ã¿¨¿¿§ÁÁ­Å¾«ÂÀªÁ¾¨Á¾§ÂÀªÄ¾¬À»¨ÀÁ©¿¾ªÁ»©¿¿¦Â½¨ÁÃªÄÀ©¾½©¿¿¬Á¾©¾ÀªÂ¾ªÁÁ¨ÁÀªÁ¿¨Â»¥½Á¬Â½«¿»¨¿¿«À½ªÁ¿¨À¾ªÁ»©½¼ª¾¿§¾»¨¾¾ª¿¾¨Á¾«Ã»ªÁ¾«¾À«ÁÁ§Â¾ª¿Á¬¿¾¨Â½¬Ä¿¬À¾©¾¿ªÀ¾©¼À¨Á¾ª¿¾¬¾¾§Á»¦Â¾­À»ªÁ»©Á¿¨¾¼«Â»§Á½§»¾¨¾º¦Á¼ª¿½©¾¾¨¾½¨¿Àª¾¼¦À»§¾½¨½¾ªÀ»¤¿¿ª¼»©¾¾¬¿¼¨¾¼©¾¹¦½¿ªÀ¼§Á½§Á½ª¿»ª¾¾¨Á½¢½¼¨À»¨Àº§½»¬¼»§¿¿¦½»§½¼¤¿¼¥¾½¬½¼¦¾»¦»º¦¹¸§¿¸§½¾¨»»¨½º¦»»¥¾¿§»·¤¾»§¾º§¾º¨À½¥¸¹§»¸©»·¦»¹¤»·¨¾¼¤¼»¦¹º§»½©¹º§¼¹¤¿¹¥»»¤·º§¿µ¥º¹£·» »º¢·¹¥»º¦¼·¤¼¶¦º·¤»¸¡¹·¤··¤·º¤¹·¤¸¹¤»¶£¹·¢º¶¤¹µ¹µºµ¢·±¤¹³¤¶µ£º³£··¡º·¥¼µ¥»´¡¹·¢¹¹ ·´£¸µ¡¹µ µ´§ºµ »¶·³¢»³ ·¸¢µ´»´¸·¤º¹¹¶¢¶µ¶µ ¸²·µ ¶¯·´¢·º£¶·¥»¸£¹µ¢·¶¤·³¢º´¡··¤·´¡·³µ²µ´¸³¡´²³±µ³¢µ³£·°µ´¡¶´ ¶³¶± µ  ¡ ¡¢¦¡¡¡ ¡ ¡¡¡¡¢  ¡¡££¡ ¡¡¥ £¡¡¢¡¥££¢¡ ££¡£©¤§¡¡¦¦¤¤£§¢¡¢¥¢¤¤ £¤¤¤§¦§¦¡¥¦¦¡¥¥¦¡¤§¦¡¤§©¦¨©¢§¦§£§§ª¨§¡¥¤¨¨©¥¨¥¦§§¤¦¤¦¥§¤¥¢©¦¦§§¥«¨¦¤§¥«§§§¨¤ª««¦¬¨¬¨¦««§ª¬­¨¥©¬©¨¨¬¬­ª¬§©ª«¦«­®ª«¨«¥¬§­©¬«««¬ªª©©¬¬¬¬§­¬­­¬§¬®¬¬¬«¬¬©®­©­¬«¬®¬­®®®¬®­«¬®¬«°ª­¯¬ª®­¬¬¬­¯¬²¯®¬®®¬®®¬¯¤¬¥£¢lzf{fr`|oYwfKkQBlUO`YI`WIbYU_`KY]UiYKd]I`[KdYF_OKYQM_]Q]iS`_Kd[K``M`]I`QM`YK_WI``MdfQb`KgYDbUB`]FUYBYQDYODYM?YYD_kUdbnz¶ÁÊÓ§Ü¯ä£¶î¬¸ð­¾î­Áñ±Åó³Ãó°Èô±Æõ°Ãô±Èô°Åõ²Æö®Æö¯Æö²Éö°Æö³ÉúµÊú¶Êú¶Îú¸Îú¼Òú·Ðú¾Ðú½Ðú»Ôú¿ÒúÁÕú½Õú¾Óú¾ÕúºÓú¶Ï÷³Ðø³Ïú·Ðú»ÑúÀÔú¿Óú¿Ñú»Ôú»Óú¶Ðú²ÎúµÍú·Êú»Ðú»Ñú½Ðú½Òú¾ÒúºÒú¾Õú½Óú¿Õú¾Ôú¹Õú¼Ôú¾Óú·Öú·Öú·Õú·Øú¸Õú½Ôú·Óú½Õú»Ðú»Ôú»Ôú¼Óú¸Ôú·Óú¼Ñú½Ôú·ÔúºÕú¸Óú¹Òú·Òú¹Óú¸Óú·Óú·Ðú·ÑúµÓú¸Îú·Ñú³Íú²Ìú·Òú³ÌúµÊú°Ìø®Êö²Çö¬Æ÷°Çõ°Æô¬ÆòªÈñªÄï¦Åë£Àç½Ü¸×³Ó°Ø±Ó¯Î¬Ä£¶~£·x£t¤~µz®qklngnlnnd_~Y{{QwlMqdFlgKd`Ok[FfUDb[K`YK`]Kd_Kd[OddYfgUkgIlWMiWI[UD]UD[U?[MDWI:WMDYD:UMBWI?UK?UIBSMDSSDUKBYSI]YF_SMYYM_YU]_SffSgl`gr`t||¨¨¨ | ³£¨¹´¹¶¸·»¢¸º¢¹½ »¹£¹»£¹½ »»£»»½»£¹¹¤º»£¾»§»»¢»¼¢º½£»º¡º¹¤¸»£¸»¥º¹¥¿¿¦¸½£»¾¥»»¦¾¾§¾¼¥½¾£¾¾£»½¤»½§½¿¥º¾¤¾¾£¼¾§½¾¨¾º¥½¼¢ºÂ¡½¼¥¾¿¦¿½§¾¾¨»¿¦»¾¥º¾¥½¼¤º½¥»¾§»¿¨½½£»¼¤¼Á¥»½©¾½§¼½£¸º£»¼£¾¾¤½¼©»»¤»½¥º»§¼¿£º½¦½½¢»¼§»¿¥¼¼§»½§»½¥¹»§·»£¸½¦»¾ª»Á£»»¤º½¬¾¾¦º½¥»¼¥»¿¤»¾¦¼º¦¹¼¥¹¾«½¾§»¾¥»º¨»»¤¸º¥¹½¥»¸£¹»§¹½¥º½§»¾ ¶½¤»½¥º»¥»¾¤»¸£½»¢·»§º¹£º¹§¹·¤¼½£¸»¥»»¢·¹¥½¼¥º½¦¹»¦·¾¥»»¦º»¦º»£»½£¸¹£¹¹·»£¹»£º»£»»¥·¼¦¹¹£¹µ¦·½¡ºº£»»¡¶»£»¸ º·£·»¥·¸·»£¸·¤¸¹¤···¹¥·»¥»¹£¹»£¸·¶º¡¶·¥µ¸£·¹¹·¡µº¡··¢º¶¥¶¸£·¶¢¸µ¡·¹£µ· ³· µ¹´³¢µ¸¡´º£µµ·¶³µ£·¸¢¶·£··µ·£·µ¶·²· ·· ·³ ²´°µ ³µµ¹¡¶¶µ¶³µ ´³··³´²·¡¶³µ³¡´² µ´³·¡°³´´´·¡²¶³µ²µ°¶ ²±µµ¡°³³³¶³¡²°²³°³ ±²°µ²°³·²³³³¡´·µ³¢¶´ ²µ¯³¡³´¡°³ ³´±°²²¡±²²¯°±°¶²°µ´¯³²³³¢£¡¤ ¤¡££¤¢¤¤¦¢£¡¢¤£¢¥¢£¤¨¤¦£¢¡¦§£ª©¥¤¨ §¥ ¤¥ ¥§¥ § §¥§¤§¤§¦¢¬¢¥£¥¤¬©¢«¥§¢¨¤ª¡¬¡«¡¨¤«¥¬£©¥¬¤¨¦­¤©­£«¦¨£©¤¬¡©¥¬¡©¦ª¦­¦¬ª¬¤­¤¬¦¬£¬ªª¤¬§©§®¤©¨¬§¬¦¯¦­¦®§¬¥®¥¯¥­ª¬§¬¤®¢¬©®¤¯¨¬¦­§¯«®¬¯§±ª°«­¨®ª¯¬±©²¬³«¯©³«°¦±¨°«°ª¯ª³©³«³©¯§³§°ª³®³©±«²¬³¬³ª°©²¬²®¯¬²¬°¯±¬³¬¯­³¬²ª³®³©²ª²®²­³¬³ª¯¬³«²¨³±³¬³®³²±®°¯µ¬³®²±·²±¬´¦¯¤¦~¤luqktio[{`QxKOl[MkOUkWSkWWibUk[UnWWk]Wi[WkSMfQOfWSfdWibWn_Qk]WngYg_UoQFkYUb]Ui_QigUi`UkSMiWSdWM`SFdOOdWQbSMidUfltz®ÀÈ¥Ñ®Ü£²ã§·é¯¿ð¯Àñ²Åò°Èö²Æö´Éõ´Ëõ´Éõ³Îõ³Íö³Ì÷³Ï÷´Ìö¶Êù´Ëù´Îú·Òú»Îú¹Òú¼ÖúÂÕú½Õú¼ÖúÁÕú½×ú»ÖúÁÙúÁØúÁÙúÁÛú¿Ûú¹Öø·Öú·Õú½Õú¿ÚúÂÙúÃÛúÀÛúÀÖúÀÛúºÕú¹Óú»Õú½Öú»Öú»ÕúÁÙúÁÖúÁÛúÂÙúÁØúÄÜúÁÙúÆÚúÁÙú¼Øú¼×ú¾×ú¾Üú½Üú¼Üú¸Ûú»Üú¿Ùú¼Ûú¾ÛúÁØúÀÜú¿ÙúÃÙú¿ÚúÀÙúÁØúÁ×ú»Ûú¾Ùú¼×ú»×ú¾Øú¾Ûú¹Øú½Øú¹Öú»Øú¼Öú¾Òú·Øú¹Öú·Õú·Òú¶Ìú¹ÒúµÐú´Ìø³Ðö²Íö³Ìö²Êö³Êö°Ëô¯Èñ®Äð®Çí¨Áç¤ÃÜÁÛ¹ÙºØ¸Ô³Ï±À¬¼ª­{­¶©ruonqu{uolk_~]nQ{qWuk[odOt`Oo]Ql]Qi_UlfQn]SofWoi[tfWo_SoWQgMQkSMlSKfWKdOMbOOdIK_KK_IF_FM]KKbKMbMKbQKdYMbYMiSQd[Sg[Yi_Yng]nf_rliuwn¥«¨ ¨¡¤²¬·¥µ½£»»¨¼»§¾¼¦À»§¿»§¿»¥¿»§ºÁ§Á¾¨¿½¥Áº¤¼¿ª¾¼ª¾¼¥Á»¨¾º©Àº¦¾¾¦¾¾¨Â¿©À»­Ã¾«¿¼«Á½¨¿Á¨Â¾¬Â½©Â¾ªÁÀ¬Á¿§Á»«À¿¬¾½¨ÁÁ©Á½¬Á½¬ÁÁ¬À¾ªÁ½©ÁÁ¨Á¿­Ã¿¬Â¾§¾¿¬¾¿¬Ã¾¤Â½©¾½¨Ã¿¬À¿­À¾¦Á¾©»¿«ÁÀªÁ½©ÀÀ©¼À¬Â¼¬¿½§¿¿¬¾»ªÃ»ª¿¿©¾¿ªÁ¾©¾»¦¾½§¿¾¬¾½¬Á¾¨¿»¨¾½¬¿¿©Á»ªÁ¾¬ÃÂ¨¿½¦ÀÀª¿¾¬ÁÀ¬À¿¬À¼¬¿»§Ã¿ª½¾ª¿½¨ÁÀ¬Á½¨¿¿ª½º¨¿»¨¾ÁªÂ¸©¿»©»¹©Á¼¨¿½¬¼½¨Á¿ª¿½¬½¿«Á»¨¾»¦»¼¨¾¼©¿ºª¼¼§¿¾¨¼»«¾¼§¼»©À»¬¾¼¨Â¹ª½º¬½¼©¾½¥À¿§¾¾¨¼¼¬¿»¨½»¨¾»«¾»¨¼¾©¾¹ª¿¹¡½¸§¼¾¨¾¸¨¾¹¦»¸¨º»¨¾¸£¼»©¿º¦½¸ª¾¼«º¹¤½¶§¿º©»¹§½»§»º§½¼¦½¹¨»·§½»¬»»¤¾¹§¹º¦»º©»·©º¸¢»¶¨¼¼§º»¦¼¸£»¹§¼·¥¹¶¤»·¦¾¶¤·¶¢»¹¥»·§º·¥¹µ§»¹§¹·¦»·¤»·¢¹¸¥·´¤½³¥º·¥º¶¥¹¹¢·¶£¸³£º·¥»¸¥¸´ ¸µ¢·¶£¹²£·´¡·´§»· ·´¡¹·§¹µ¢·´§¸¶¦·´¤¸µ¡··¨¸³¢¹³¡¹·¤¹·¤·³ ¹µ¤··¢·³ ¶° ·³¦µ³µ·¦¹¹¦¶µ¤·³£¹·¤¶·¥¹µ¤¸¹£´´¥º³¢·³£¶´ ¹µ¡´´¢·³¡¸³¡³²¦µ³¡¶²·´¢µ³¤µ³ ´¡¡¡¡¢¢¡¡¡¡ ¤¡¡ ¡¥£¡¢¡¢£ ¢£¢¦ ¡¢ ¥¤£¤£¢¤¡§¤¥¤¤ ¡¥ ¥¢¥¤££¡§¥£©¢§¢£¥ª¡¥§§£¦¢¦¢¦¤¥£¦¤§¦¥£©¡§£¨¦¨¤¤¥¦¡©¤¨¦¨¡§£©¥§©©¤¨¥©¦ª¦§§§¦¨¨­©§¦©¥¬©«§¨©¬§«ª«¨¬¥¨¬¬©¬¨¬¨ª§¬©¬¬ª©¬¨«ª©ª¬ª«¥«¨¯§¬¬ª§©ª¬ª¬¨©ª§¬«¨¬ª¬¦­ª­ª¬ª­ª¬ª­ª®¬¬¬®«¯¬¬¦­«¬°«¬®¬®®­¬®¬¯«¬ª­®¯««­¬¯°¬¯¬¬«®¨®§­¦¨ otizik|oY~gStWOgMDfQI[SQ]WF]_Qb`O]WOfUIdWKd[I`OI_SK`SS_fSf_QdYMb]Ok_Qf_KdUD`YOdbUbbQddKk[I`SF`UD_MFYO?[MI[UB[_I`w]ilr«|·ÄÈ Õ©Ü®è©³è¬»ì­Áñ±Áñ«Âñ¬Âõ²Ãó³Çò­Æò³Äö¯Æõ¯Êö°Èö±È÷²Æù¯Êø´Êú¶Ìú¸ÏúºÎú¸Òú¼Ðú»ÒúºÔúºÓúºÔú»Öú¾Ñú¾ÓúºÒú»Òú¶Ôø´ÔúµÐú¸ÒúÁÕú¼ÔúÁÕú½Õú¸ÓúºÒú¸Òú»Òú¸Ðú·Ðú·Ñú»Òú¾Ðú¼Ôú¼Óú¿×úÁØú¾Õú¾Øú½ØúºÙú¸Õú·Öú·Öú·Óú·Öú¸ØúºØú¹Öú¹Ùú·Öú»Øú¼Öú¾Öú¼Ùú¿Øú½Öú½Öú¼Öú¼Õú»Õú¶×ú¼Öú»Òú½×ú»Òú¹Òú¶Óú³Õú¸Ðú¶ÏúµÓúµÐú´Ïú²Îú²Ìú³Ëú±Ïú²Ëú°Êø±Êö±É÷±Æö¯Êö­Äõ­Æô¬Äð«Åï«Âí¨Áé¥Âê½ÛºÜ·à¶×´Ö¯Ó¬Ç©½¤ºx«w¦~°¶|¤tnlq o uqnnkf[{Y{qQwrSoiMngKl`Kg]Of_Ok`Kg`SifSk`UfdOgfMgUDbSI_OFYQF[UD]Q=]Q?WQBWIDWIFYK?UM:UMB[WBYIDYQB[QIYQI`YI_UM_[Sb_Qg`Skg_kufz|rzª¤¤| ¬¢³¬º£°¼¢·»¢»½§½» ¸·¢¸¼¦»¹£¸¼£¹º¤¹»¼»§º¹£»»¤º½£¼¹½¼¦»º¡¸»¢»¼¢¼¼¤·»¥¼Á¡»¾¨º¼¥½»©¼½¤¼½¨»¿¦¼»§º»§½»£»½£½»£º¾¨¼¿¢»½¥À¼¦¾¾¦¾¿¥¾¿¦¾¾¨½À¤¾¾¥»»¥½¾©¾¾¢¾½¥»½¦¸¿¨¾¾¦¾¾§»¼¦»¾¥»¾¥½½£¼¾¤¾½¦»À¦¾¼§»½¦¼¹£½½£»»©»½¤¾¼¤¹½¤»»£»½£½»¤º¾§½½¤¼½¢¼¼§»¼ª»¾§¼¿¨½¾¨½¾¤º¾§º¼¤½º¢º¿ª¼º§»»¤½¼©º¼¦½»¤¼»¦»À¤¼»¨ºº¤º¾¨»»£º»£»¼¥¸º¤¹¼¥¸¾¦»½¤»»¦½»¢»¼§»»¦¸º ¸¸£»½£¸»¨»¸¢º¼§¼»£»½¦¸¹¥»¹ ·º§·»¥»º¢¹º¥»º£º¸¤·º¤·¸¤¾¸§¹»¢¹º¡¹·¡¶»£·»¸¸¢º¸ ¶¸¡¹¸£·¹¢¸¸¥º¸¤¶¸¤·»£º· º¸¡¸·¦¶·¡¹·£·»¢·¼¤··¦¼·¦µ»£º»¡º»¤¶·¹»£¸¸¥·º¢¸³¦¸¼£··£·¸¶¸¡¶¸¶·¢ºµ¡¶·µ»¡µµ¢³··¶¡¶µµ¶¤¶···¡··£µ¶¹· ´·£··³¶µ´ ²· ·´µµ¡³³µ³µ´¶³³±³³µ³¡²²³±³µ£³³²²±³³³µ´¡²³³·²³³· ²µ³³³³¡²¶ ²³³µ´² ²´³µ²´±´±´²¶ ³µ ·µ³µ¡³·¤·²±¸³´´³³±³´ ²²®³°²²°°´¡°³³²²±¯´° ¢£¤¦ £¤¤¡¡¤¡¥¡§¡£¦¤¦¤¦¤¤ ¦£¤¢¥ ¦¦¥¤¥§¡¦¥© ¢«¦¦¤ ¥ §¡©¡¥ ¦¦¢¥ ¦¢©¨¡¦©¢¥¦ ¨¢¨£¥ §¡©¤¬¡«¥ª¡©ª ¨¦ª¥¬¢¨¡§¤«¢«¢«§¬£¬¢«¤©¡­¢¨§¨¤¬¥¬¥¬¤­¤¬¤«¥ª¥¬¨¬¤« ®¥­¨¬¦¬¦®¦¬¥¯¤¯¥¬¦««¯«©¤­©¬¨®¦¬§±¨­¬±¦¯«­§®®±«±­®¨±©°ª®©¯¬³¬­©³©¬­¬ª±¬²§°¯®¬­¬®ª¯§±ª±¬±ª±«²¨±§°¬±¦³­´¬°«²¬±ª®¬°¬°¬³«³®·­³¯³­±¬¶¯±¨²­³¯¶ª´¬°®³¯³¬´®³¯°¯³­³­²¬³©´§¬¨¬§t{rqzlk[[SuYOkSOlUOdUSb[Si[Wg`[oWWnWOlbUi[UlSOgUSgUUgbUo][o]Sk[So_[kbWi[Qd[Sni[lfSlfOnWQi[OfSQbKMbOF_QOb]Sfl]ln|¢±»Æ¢Ð¬Û¤´æ¬·ï¯¾ð°Ãñ¶Åò·Èò²Èô²ÌõµÆôµÎõ³Ìõ·Ëø³Èù¹Îù¶ÍùµÌú´ÐúºÐú»Ñú¼Óú¾Òú½Öú¾ÖúÀÓú¾×ú¼ÛúÀ×ú¾Øú¼ÛúÀ×ú¿Öú¸×ù¸×÷¹Öú»ÕúÁÖúÁÚúÃÛúÄÛú¿×ú¿Øú¾Ûú¼Ùú½Ùú¼Õú½Õú½Öú¼ÖúÁÙúÂØúÄÙúÃÝúÃÛúÀÜúÂÝúÁÝú¾Üú»Üú»Ùú¶Úú·Ùú»Ûú¾Ýú¾ÜúÀÛúÁàúÁÝú¿ÞúÃÜú¾ÝúÃàúÁÙúÂÛúÃÞúÅÝúÁÝú¿ÚúÂÚúÁÜúÂÙúÀÙúÀÜú¿ÚúÀÛú¹Ùú¸Öú»Õú»×úº×ú»Õú¸Öú·Óú¶Ñú¸Ðú·Òú¶Ðú´Î÷µÎø³Îø³Íõ³Ìö³Ë÷±Èô°Ëõ­Çò¬Çò®Çï«Åì§Áá¡Ãâ¢¿ã¥¹Þ¡ºÙ¹Û·Ò²Á¬Á¦»~¥­|­³³{¡qtrw¢wuuz¡uqn`x`u[wn[zqStk[rfUiiWqdSndWoi]qgUnk[qdStWSkQKgKQbQMfSOdSKgMKbSKbFDdDK[MMbIMbKQ]QO`OK`SQbOSdQOfWSfUQg_Wf`Wob[kfYoldx{q¥¬¤¤ ¢³¡°·¤µ¼§¹¼¨¼»¦¾¼¨½»§»¶§¿»£¾¿ªÁ½ª¿»§¿¼¬¿»¨¾¾¦¿¾©À¾¨Á»«¾¼ªÁ¾¦¾»¨À¾ª¼¾ª¿»§Â¼©Á¾§ÁÀ¨Á¼ªÀ»ª¿¾¬ÂÀ¬Á¾¬Â½«Á¾¨¿¾ªÂ¾¬¿¾§¿¾¬Ã¿©¿¾¨¿¾©Á¼¬Á¿«¿¿¨Â½§¼¿¬Å¿©Á¾«Á¾«Á¾«Á¾©ÄÀ§À½«¾¿ªÁ½«¾¼¬¾¾ªÂÁªÁÁ¬À¾¨¾»©ÀÁ¬À¾ªÂº¨Á¼­½¾§À½§Á»¨Â¼«À»¬ÁÀ§Á¾«Á½§¿»¬Á¾¨¿Á¬¿¾¦ÀÀ«¾½«À¾©¾Á¨À¾¬Á¾©Á¾¬À½§¿¾¨À¾¬¾¾ªÀ»«Á¾ª¾¾«Á»§¾À§¿¿¬¾»¦¾½©¾»«½»ªÀ½­¾¿ª¾Á¦¾À©¿¿ª¾¾¬¿¼©¿½ªÁ½©¿¾¨¿¼©¼¾ª»º¨¾¼§»»«¾»¨Á½ª¾¹¥¼·¨¿¼¨¹½©¾º¥¾º©½¼¬¿À«Á¸¦½¹¦»¿§¼¾©¾»­»»¦¿»§Àº¨¼º©¾»©¿½¨½¸¬¼¹§¹¼¦½»¨½µ¨¾¼§¹¹£»º¤¾¹¦»¾¨¾¹¤½¸¨¼¹¨¾¸¦»·¨À¾¬¹¸¤»¾¥¿º©»»¨¾º¥¼¹¥¾¸¥¾º§»·¥¼»¤»º¦º·¦¼¹¦º¶£º¸¦º»¥¹³¦º´¤¸¹¡º·¡»µ¨¼·¥¸¸¦º¸§»µ¦º¶ »·¥¹¸§·¸¥º´£¼´¦µ·¤»´£º¶§·´ ·²¥·µ¡¶¶¢·µ¡¸·£¶´¦··¢¹³£¶º¥··¥·³¤¹·¢¶³¤º·¨¶·¢·³£·¶¢¹´¥·³¢¹¶¡µ´¦³´¦·´ ¶µ¤µ¶¥·³£··£·´¤µ³º³¦¹·¡»·¥¶³ ¸¶£¶²·µ¡·³¢¹·¡µ´·³§³´¢¹³¢·°¡¸³¥µ³¢µ³£·±µ¡  ¡ ¡  £¡ £¡¢  ¥¢¡¡¤ ¡¡¡¥¢ ¡ ¢¡¥££ ¥¡¤¢¤¡¦¤£¤£ ¥¢¢§¢§ ¥¤¡¡¥¥ ¢¡§£¥£¦¢©¡¤¤ª ¦ ©¢¤£¥££¡¥¥©£§¥¨£§£¨¢¨£©¥©¤©¨¨£ª£§£¦¡©¦ª§©¢¨§©¦«£ª¦¨¥«§«§§¦©¡¬©¨¨ª§©§««««ª¨¬©«ª«§®¨ªª®§¬©¬¦«§¬§«ª«¦«ªª««§¬©¬ªª©®©¬­­§¬¬¯ª¬«¬ªª¨¬ª°©°«¬«®§«¬®«®¬­­®¨­ª¯ª¬®¬¦®¬¬±®¬²«­ª®¬¯«®¬°®¬«¯¬¬ª­¥©©¨£gqgrorYbMuUDkSFfWF_QIbSF__K[[M`fKdYKfYK`[Kb]I`Y?`MK_dQ``QkUMf]Kf`MbWIddO`[Sb`OifQffK__FgOI``D`O=_O?WQ?UQF]gOgz]go¨{ºÁÆÔ¬â¢±è§¹í«¸íª½ï©Áï°Ãò®Äò¬Äô²Ãö®Åó¯Çô±Æ÷µÌö±Èù­Éú²Ëú³Íú·Ìú¸Ðú¸Ðú½Óú»ÒúºÒú»Óú¹ÕúºÒú»Óú»Ôú»Òú·Óú­Ñð°Íù±Ïú·Îú»Òú»Óú·Õú»Õú¸Õú¸Óú»Óú»Öú»Ôú·ÓúºÕúº×ú»Õú¼ÕúÀÕúÁØúÁÙú½Ùú¾Ùú¾Øú¿Ùú½Úú½ÙúºÙú³Úú´Öú°Öú·×ú¾Ûú¾ÜúÁÜú¾ÜúÀàú¾ÜúÀÛúÀßú»ÛúÁÙúÁÙú¾Øú½Øú¿Ûú¿Øú¾Ùú¾ØúÀÙú½Ûú¹Öú·Öú¸Õú·ÓúµÖú·ÒúµÔú¸ÔúµÓúµÒú³Òú±Îú´Ðú°Éú³Îú±Èö¯Êõ­Æö®Èö¯Çö­Çó±Æó«Åó©Æñ¬Ãñ§Âî¥¿æ£Àç§½ß¡¾ã¸á·ÛµÖµÓ®È­Ä¥¿¢µu¥{²¶x©lqkk£nlnn¢t¢iidUzUtw]wtQtoSigSkiKnfOifOg_OkgQggSk`MiYDfYD`M?bM?[KFYQB`MBYD?WI?WK:WKBQK=UKDYO?WOB]M?_SF]SF`SD_QI`]ObYKf_Mf_Qig_nzdz|r© |{u®§·®¹£¶»¡º¹¸º¢½·£¸½ º¹¢»¼¥¼¼¡»¾£½¾£»½¦¼½£¾½§»¾¢¾¼£º»¢½»¡»»¡¾º£·»£¸¾¢¾¾¡¿»©¾¼¥¼» »¹¤»½£¾¾¡»¿¤½¾£»º¢»¿£¾½£¼¾¥¼¾¨»º¡»¾¦¼À§¼¿¤½½¦¾À©½»¤¼¾§½½£ºº£»¾¤º¼£¾»¦»¼¦½»¥½»¥»»¤¿»£»½£º½¤½¾¢¼½¥»»£¼»¥¾¹¡¾¹£»¼¤½¼¢»¾¥»¾¢½»¨¼¼¥»¼£¹À©¾¼£º»¢»»¥½»¤»¾¤¼º£º¾¥»Á¦½º§»»£¸»§½¼¦»¼¥º¼£¼¼¥¼¿¥½º¤¿»¥¼»¥º»¤º»¤»»¤»¼¥»½¦½½¢¹¹£»» »¾¥»¼©»¸£¼»¥¾¾¥»¼£»¹£¾»£º¸¢»»¸»¦º¶£¹»£¸º¤º·¢»º¢·½£¶¹£ºº¡º¸ ·½¥¸¸º»¥·»£µ¹¡»»¡¸»¢··¤»º¤»¹£º´¡¹¸·¼£¸¹£»»£»·¢·¹¡¹º¤µ»£¸µ»·¡·»¡µ»¡º¹ ¸»¢µµ¢··¡»µ£··£¸·¡¸¸¡·¹ ¶»¢¸·§¸¸£¸¶¸¸¤·»£·· º¹¶·¢¸º¡¸´·¸¸· º¶³·¡µ·¢¸· µ³··¶¶¸¹¶·µ··¸µ¸·µ·¸···³ ·³³³³³²µ¶¶µ³²³³µ¡²²³³²³³³¶²¡³µ³´ ²³³²´µ´³´´²²³²²³³´³µ³´²³²°³³´´°³³¶µ·¢²´´µ³´ ³·´´²µµ³³²µ´²²³´°³°²²²±³´¶³­®²°³³ ¢¡¤¥¡¤¥¦¢¡£¤¤¤¤¡£¡¦¦¢¤¢¤£¢£¡¦ª£¤¦¤¦§¦¥¥§ £¡¦¦¦ ¬¨§¡¨§ ¦¨¦¤¨© ¦¢§¨©£© ¬ §¨¡« §£©¡§¡ª¬¥¬£© © ¨¤§£ª §¢¬¤© «¢«£¬¥©¥¬£©ª¦® ª¢­¤¬¤¬¦­¤¬¤­¥¯¨¬¤¬§°£­¦¬¥­¤¬©«¥®¨¬¨°¥±¦¬¤­¥¬¨¬§®¢±¨²«®£°§¯ª¬¥­ª°¦¯¨¯¨¯§¬¨°ª¯§°ª®©±©¯©²¨°¦¯ª¯«³©°¬¯§³©°ª°«³«²¬²­³¦²®²ª°ª³¬³¨³¬³«°«µ©´®´¬µ©³²²¬³¬³«²­±¬µ¯³«³¬²®²¯³¯´ª³®´¯³¬³®¶¬¶ª°­´¨³¨¬£¨z£{n{wxrr[fS~SMrMQg]QiUOgSOfYUi`[kbUlWUn[Wi[Ul`UlWQkWUkfWki]rWOkb[kbSo[QqdYi_[ngUti[n_SodQqWOi[MiOI`IK_UQb]Uiu`uwx¨»Æ Î¨Û¢±ã¡µç¬¼é©¿ï¯Àï®Æï®Æñ²Äô²Éô³Êó³Èö·Ìõ³Ì÷µÊù·ÎúµÏú¶Ðú¸Ðú·Ðú»Ñú½Õú¾ÖúÀ×ú¾Õú¿×ú¾Ùú¿ÙúÅÛúÂÙúÁÛúºÖú±Õñ´ÖùµÒú¼ÒúÂÛú¿Úú»Ùú»Øú¹Øú¹Ûú½ÚúÂÛúÁÝúÃÜúÁÜúÁÚúÀÚúÃÜúÁÝúÀßúÄÛúÅÝúÅÜúÅÞúÇßúÃáúÃßúÃáúÀàú¾áú»Üú¼àú¿ÝúÄÜúÈàúÊâúÊäúÊäúÇäúÊâúÅâúÆàúÉàúÈÞúÄÝúÅàúÄàúÄÝúÃÙúÀàúÂÞú¼ÜúÀÝúÁÝú¾Ùú¾ßú»Úú½Ùú½Øú¼Öú¼ÖúÀ×ú¸Øú·Õú·Òú·Îú·Óú´Ðú·Ïú±Ðø´Ëö¶Íõ³Ì÷´Îö°Ìô¯Èò±Çò®Èï­Æí­Æï¨Ää¦Âç¡Áä¡¿â¿Ý¡¿Ù´ÕµÅ±È«Â©®¢®³°|¡utw w¢wt {¢~¦{¤und~_|fw_~q_{n]udWxiYriYqbWuf[uf[o`[qbMnUMlSKkQKdMQfUObQFfKK_DMbKDbFK[II`FK`KKbOS`OKiOOdSOfWMiWQiQUdYYkbYnd[nf`tqkzqn§¢¨¡{ ¦¢º¡³»©··¨¼»§¿¾«¾À«¿¼¥Á¼§ÁÁ¬À½¨ÂÀ¥Á½ª¼»¥Ã½¦À½§½¿©Ã¾©Á¼«¿º§Á»§¿¾ªÃ½©Á¼£Â»©Á¾¨Â¿ªÁ¼§¿º§Á¼§Ã¾§¿¿¬Å»¥À½¬ÂÁ«Á¾ªÁ¼­ÁÀ®Á¾«Ã»¬Á¾«À¾©Á¿¬Å¿¬Â¼ªÁ¾¨¾¼«¾¾¬Á¾«¾¿¨Â¾ªÁ¼©Ã¾«¿½ª¾»«Á¾§¿¾«À¾¬Á½¬Á¿¬Á½¦Á¼¨Á¾¬Â¼¨Á¿©Á¼¬¾À¬Á¼ªÀ»¬Á¼¬Â½¦½À¬¿¼¬Á¼¨Á¿©Àº§¿¾ª¾»¬¿Á«Áº¥¿½©¿¼¬Ã½¬Â¼«Â¿«À¾ªÁ¾ªÁ¼¬¿¼¬ÀÀ«ÁÁ§À»¨Á»¥¿¾¬Á¼¬À»¨Á¾¬ÁÀ¬¿½§¿½©½½ª¾¾©Ã¼­½¼¨¿¼¦¾»«À¾¬¿¾¨Âº¨Â½§Á½©Á½¨¾º«¾¼¨À¼©¾º¦ºº¨¾»©¾»©À»ªºº¨¿¼ª¿»§½·§¿¹¥½¾§¼»©¿¼«º¸¨¾»§¿»ª»¹¨¼»§À»¬½¼«Â»¨¿º¬½¹¤¿»§¾»§Á¹§¼¼¨¼¼¦¼»§¾»¦¾¼§¾»¨»º§¾º¥¿¿ª»»«½º¨½»¦¼»«¼¹¥½¹«¼º¦¿»§Àº¨»·§»·§¼¶¤»½§¾µ¤¼¸¦»¹¨¿»£¸¶¢¾¶¦¹»§º·¤º¹©º·¤·¸¨¼·¥»·¦¼µ¤»·¦¹¸¥»´¤»¶¥»¹¦º´£·µ¤··¡»·¢»¹¤º³¦´³¡»µ¤»´¥¹¶¥¹³¤¶·¤¹·¢´³¤¹³¤·· ¹³£¹´ ¸¶£¶³¥·³£·µ¤¶¶¢·³¢ºµ¤º³¢·´¤¸´¤¹·¸·¦»µ¥´µ¤»¹§¹µ¥¶µ¡º³¤¹µ¤··¡¸´¦·µ§¸±¢¹µ¢¶±¶¶¤·´£·°¤´³¡¸± ·³¡µ± ´¡    ¢£¢£ £¡§£   ¢¡  £¦¡£ ¥££¡¡¡£¡¤£¥¦¤ £¢¨¢¢££¤¡¤¡¥¡§ §¡§£¥ §¤¤¥¦ ¦¥¥££¥¦¢§¢¥¡§¤£ ¦ ª¥¦¥¨¤¨£¥¤ª¥¨¤¦¤¢£¨¤ª¢¦¢§§«¢¨¡§¤§¦§§ª¡§§©¤§©¬¥§£¬¦©§«¦ª§¬©¬§©¦¬§¬©¬¨©¥®¦©©­£«©©¨¬©«¤¬¬ª§­¦©©­©¬§®«¬§®¨¬§«§«©­§¬§°©¬¬®«­¨««¬ª®§®¬¬¬¬ª­«­¨¯©®¬®¬¬«­©¨¬²§­¬®«­«­¬«©¬¨°¦¬¦¬¤¥§krlwx{_iQ|bIqKDfM?_QI_MB]UI[UI]`Kb]IdUI`YO`UK`]M`[MfYUdlUflWk`MkYMgdMdQKg_QddQdiUgdIf_Md`DdU=_UB]M=]F:[UI[gU`lu¡uºÀÏ¢Ö«Û®â¤³æ§»êª¾í¨½í«¿ï«Ãï°Ãï«Ãò®Ãö±Ç÷²Æø°È÷³Èú´Ëú·Éú¶ÍúµËú¸Îú¹ÑúºÑú»Îú»Õú»Òú¾Óú¸Øú¼Õú¾Òú¹Öú·Ðú²Òò®Ðù±Ïú»Ðú¼Óú»ÕúºÖú·×ú´Õú¸×ú¹Ùú½ÛúÁØúÃÙú½Ûú»Õú»×úÀÚúÀØú½ØúÀÜúÀØúÁÙúÅÝúÅÜúÆßúÆÝúÃÞúÄßúÁÝú¾ßúºÝú¾ÛúÁÜúÃÜúÈàúËãúÊàúËàúÆáúÇâúÇÝúÄàúÁÚúÁÜúÁÜúÁÜúÂÛú¾ÛúÄÙú¾Ûú½Ùú¾Öú¿Ùú½Õú¼Ùú¾Öú»Ùú·Óú·ÖúºÓú·Õú·Òú·Îú´ÐúµÏú²Îú°Ïù­Ìú°È÷­Ë÷¬Æ÷²Æõ®Èõ¯Èò©Äñ«Æï¬Ãì©Ãî©Ãñ¨Ãï§Àè¤¿â¡½ç¡ºä¸Ý¶Û¶Ö±Ê°ÊªÆ©µ|£¯z²³zªqnq q¡q¡r¡n¥x©u§r k]_~[w{[uuYwrWrkMqdOlgSndQkdMlbOffMi`IgSDdUIbK=bI=[QBYQ?[DBWM?UF=[K?UK?[IFSK?WQBWIF]S?]Q?YQI]QBbUF]SOd_Q`_QfbUkl]tz_x~r©{n{´®¶²¸¢·¼£·¸£¼»£¹» ½¹¡»»¥¼½¢º¼£»¾£¼½£½»¥»»½½¥»¾¡»¸¡½½¤»»£»»¡¸»¤»»¢»º¦¼½¦»»£ºº »º¥»¼¦½»£»¼£¼¾¤¾½¦¼¹£¹¼¥½»£¿¾¤º½¢»¾¤¾¾£½½¥¾¼¤½½¤½½¦½»¥¾»¥º¿£»»£¼½¦¼½¡»¾¨¾¾¤¾¾¦¼¼£»¹¢»½¤»½¥»¼£¼¼¤»»£½¸¥½¾©»»¥»½¤»½¡»»§»½¡¾»¡»»§º½£º¾¤À½¥»»¥½¹»»¥½»¢¹»¨»¾¥º¼£¾º§¼¾¥¼»¨»¾¦»¼¨»¸¤»º£¼À£»¾¤º¸ »»¡»»¥»º »¼§»½£¾º£¹»¢»»§»½¢»º£¸»¥·¼¥º»£¹½¨»¼©¾»¥¸½§»»¨¼¹¤ºº§¸¸¤º»¤¾¾¥¼»¦¹¸ º·¡º»¡¹¸¥ºº£º»¦¸·¡¹¹£¸» µº¡º·¢»¹£¸¸¡¹¸¸¹¢¸¶ »¹¡·»£º·¡¹· º¹¡¸»¥º¼¢ºº¥»¹¢¹·¸¹ ·¹¢¶¸£¹»£º»¤¹¸¡»·¶¸¥»¸¡º¸»¹¢¶»¡¸¸¡¸º¸µ¡»·¸º£··£·³ »»¡·¸·· ··¥¸· ³·¹·¡¶¶³³¡··¡¹¸·µ¡··¤¶¸¡³·¸±³¹¤¸³·³´¶·µ£´µ ´³²²³±£·³²¶¶²´³ ·³³´³³ µµ³³³³´µ°±µµ³³³³²´´³±´´°±³²·³°²±°±°®±°²³°µ ³·³³µ²³³µµ¡¶³±³µ³£²³²²³²°±µ°°°±±³°³°³²®°°³¯¡¢££¡£¢¤¢¤¤¥¢¡¡££¥£¦§¡£¥£¥ ¤ ¡¥¤¢¦¤¤§¦¢¤ª ¨¤¦ ¨¡©¬¡¥¥¦£©¡¤ ¨ ª§§ §£¦ ¦¡« ©¤©¦¬©§©¦©¨¡«¥¬¤¨¡¬¤©©¤­¢©¦®¢«¢­£¨¤«£«¤¬¦¬¥ª¤¬¨¬£ª¦®§­¤¬¢®¦¬¨¬¤°¨¨£­¦­§­¥«£­¦®©®¢¬¨©§­¥¬¦¯¥¬§¬¦°¨¯¦®¨®¦­¨¯©¯¨¬¦²¨³¨®ª±§­«­ª°ª±«°ª¯«¯©³ª¯¬³©±©¬«³©³«²ª°¨²ª®¬³ª±­³ª¯©±¬²«±«±©³¬±ª³ª¯®³¬±­³°¯¬³­´°³¬¯«±®µ­´¬³¯°¬³¯¶¬±®´¬³°²¬³¬·­²¬³®³§°®ªª°{¤o|w{fdS]QxOIkQK`WYbMOiWQgWYg`Uk]UnSOlYUgUSk]Sg`[l]`nrfoq`tbWr`WoiWkWQq`[kk_lk[tiUt]Si]SlSIiSOfOKdQMib]i{kq~®ÃÊ©Ö®Û£³â¥¹ç«¼ë¬Áë«Âï¬Æï±Ãï²Æñ°ÇôµÅö¶Æ÷³É÷·Êú¶Îú¹Îú»Ïú¼Ðú¾Òú¿Ôú½Óú¼ÕúÀÙúÄØúÁÙúÃ×úÀØú¿Ýú¿×úÃÜú»ØúºÔ÷·Õú¹Óú¼ÖúÁØú¾Ùú¸Öú¼×ú½Ûú¼ÜúÃÙúÃßúÃÞúÄÞú¿ßúÃàúÂÝúÃÞúÈàúÇâúÄáúÅßúÆÞúÉáúÍâúËáúÌàúÎäúÊèúËáúÈãúÈæúÇâúÈáúÊåúÎæúÎåúÌèúÎæúÒèúÏéúÍæúÈåúÊâúÊäúÊâúÈãúÉâúÍâúÆàúÈáúÇßúÆáúÃÞúÁÜúÄÞúÂÜúÂÛú¾Ûú½Üú¿Ùú½Øú»ÕúÀÖú»Øú¹Öú·Õú·Óú²Ñú³Ðú·ÎúµÒøµÎùµÌö²Í÷°Ìø³Êô°Èî°Çó³Èö³Èñ¬Åñ¬Äð£Äè¢¿é¦¿ç¥Àæ¢Áã¼Ú¸Í¶Í³Ì®Á¬µ£³¢²®|¢uw{¥{¢z£z©|©~¬~¬unofd]z`{rY|k[wl]xf[udYwfWri[qbSnYMk[QkQFkOOdUMdQFfIMfOM`KM]FO_UKiOQ`IIdSMdQMbSQdWQdUOiWIi]UiUQi_Yi[_ob_oigxnwu¦¢ °¢¬¸¨¸»¨º½¤¾º©¾»©½Á¦¾ºªÁ¼ªÀ¾¦¾¿¨Á½§À»§Àº§À»¥ÄÀ©¾»§Ã»¦À¾¦¾»©Ã»ªÂ¾ªÁ»¦Á»ªÀ¾¬¿¿¨¾¾§ÁÁªÁÁ¬Á¿¦Ä½¬¾¾§Ã¿«Á¾¬À¾¨Á¾«ÃÁ¬¿Ã­Â¼¬ÁÀ¬Á½®ÃÀªÁ¿§¾¿«ÁÁ«Ã½«¿¾©¾¿¦Á½©Á¿©Á¾­ÀÀ¬Á¾¬¿¾ª¿»¥Ã¿©¿¼¨Á¾¬¿¾ª¼½ªÀ¾¥Ã»©À¼©¼º§¿¾§¾¿«¾¿¬¾¼¥ÁÁªÁ¼¬¾¾¬¿º©À»«Á¾¥½½¬¾»ª¾¾®¿¿¬Ä¾¨Á½¬¿¿¬¿À¬Á»ª¿¿ªÀ»§Á½­ÂÁ¦¿»§¼¾¨ÁÀ©Á»¨¿»¦À¼¬ÄÀ¬Á¼ª¿»ª½Á¬¿½©¿»§¾¾©½½ª¾½¬À¾©Á»¬Á½¬¾¿¬À¼§¾»¦Ã¼¨À¼©¾¹¤À½¦½»¬¾¾©¿¼¥¾»©½¾¨¾»¨¾º¨½¹¨½½ª¼»¦»¼ªÀ»©¿»©¼»¨Â¹¤¼¸¤»¸¦Á»ª¼¿¨½µ¦»¾ª¾½ª½»©¼¹¥¼»ª»½ª¼¹¦½»§»º§»·£»ºª»½©»¾¬¼»¦¿¹©¿¸¢»»¥¾»«¼½©»»£¾»¥»º¦»¹§¼¼©¹º£¼·¥¾º§»»«¾¹¦¼¹§¼»¤»µ¦¸º¦¾·¤··¢»¹¥¹·¦¼¸¤º·¥¹¸¨·¹¢¼·¦»»¤º·¡¾·§»¹£¹· ·¶ ¸µ¥¸´£¹´¤º³£¶µ¥»µ¡¹µ¦·²¡·¶¤»¹¦º¶¡¸³¡¹µ£·µ£¶´ ·¶ »¶¢µ³¡·³¢·´¦µ³¤·²¡¹´¤¶µ£·µ ·³¦·³¢µ³¸³¡¶´¦·²¥µ³¡¶¶¨º·¤½µ¢¹µ©»µ£¶´¤¶³¦¹¯£·´£¶³¥º³ ¹´£·µ£³µ¤·³¢¶¶¶±¢¶¯ ³±¶¡¡¡¡¡££ £ £¡£¤ £¡¡¤£¢ ¤£¢¥£££¡£¡¦££¡£¢ ©¤ ¦¢¤¡¤ ¤¢§¢¢¡¦£¤£¦¤©¢¦¦¦¥¡¦§§¡££ª¡¥¡§¥¥¥¨££¤§¢§£¨¡¥¢©¤¤¦©¤«¢¨¡¨£«©§©¨¢¦¦¬§¨¡ª§ª©ª¥¬§¦£©¨ª£ª©§§ª¥¬¨«§©§«ª©§¬§­¤©¨«ª©¦¬¨¬¨¬§¬©««¬§®¬¬¨¬¦®©¬§¬¨©¥ª©¬©­­­ª°¨­©«ª¬ª¬¬®¬®ª¬©¨¬¯«®¨©­¬©±«®ª¬¬­«¯¬¬­±§ª«¬¬±¬­¬®«ª¨­«¥¦¦lwnwxnr[YDxQ?dSD_ODbOD]MIWSI_]Ib[I_YIbOF]SI_WK`WD_`UdfWdk[ln[kgMndMk[MbSId_UgkQilOgbIi[D`YD`Q?_I?`ODYUI[uWlkq£¸Î Ñ¥Ù®Ü¡­ä¢·á¦¹é«½ê§»ë¨¼í¬¾ï­Åð°Ãö°Äõ±Æø¯Æù³ÈøµÌú¶ÏúµÌú³Îú¹Íú¸Òú¹Ñú¼Ðú¹ÒúÀÓú»Õú¾Öú¿ÑúºÖú¾Ôú»Õú´Ðø³Òú³Òú¹Òú»Ôú¸ÔúµÒú¹Öú¸Öú¹Øú½ÖúÀØú¾ØúÁÜú»Øú¾Ùú¾Ùú½ÛúÁÚúÃÙúÁÜúÃÜúÄÛúÄÜúÇÛúÈÝúÄÞúÈÝúÇáúÉáúÉãúÇáúÇàúÉàúÈàúÈâúÊàúÌãúËäúÊáúÇáúÌâúÇáúÊâúÇßúÆßúÇáúÇßúÆÞúÈÝúÈßúÁÞúÆÝúÂÜúÀÜúÁÙú¾ÙúÁÜú¼Ùú¾×ú¼Øú»Öú»Öú»Ôú¸Óú·Ðú·Òú³Ðú´Ìú±Ìú°Ìú¯Êù°Êö¯ÌøµÌú°Éõ¯Éõ®Èö­Çò¬Åò­Ãò°Äó¯Äñ¥ÄíÂä¾æ¡»æ£¹â¢¹â¹Ü¸Õ±Ï¬ÌªÊ©·|¤·µµwªqqr¤qqr§w°{©w«qobd`~]~xWqnQtiUrnMqdWgbQigMobOl`OkUIkYF_Q?`M?_QBYOBYMB[K?WODYF:YK?WODYI:YMFYOB]OD_MF[UIYWK[YDbWD_YKf]Kb`Udd[it_uw`||t©´±¶£³» ¶¹¡»»¤»»£¼»»»¡½»£º¹¥½¹¤¾¹£»½¹¸¡»»¥¼¾£¹º¥»½¤»¹¡»º£º»¦¼»¤·»¼»¦»»£¹»£»º¥½¼¦»»£¿º¦¾¾§¿¾¤½½¤¾¼©»¾¥¹½¤¾¾§½¾¨½¾¨¾¾¥½¼§½½§»»£»½¤½¿£¼¼£ºº¦ºº£¼½¥¹¾¦½»¦¾¾£¾»§º¾¥¼º£¸»¥½º¢¼¼§»½¤»»£¼»¢º½¦»»¥º» ¹¸£º»¢¾·£¼¼£»»£»½¢½¼¥»»¡»¾¡»»¤½·¡º¹¡º¼¥»»¦»¼§¾¾¨½¼¥¼½£»»¤½¾¦»½¢¾¼£¸º¦º½¦»¸ ½»§º½¤»»¥½»¤¹½§¹»¤»½¢»¾¦½»£»»¥»»¥¼¹¥¹¾¡¼À©½»¢»º¢º»¢·»£»µ¢¹º¡··£»¸ ¹»¨¸¸¢º¹¢º·¢»¼¢º¶£¹»¥»º¥»·¦»·¡¹¼ ·»¢¸»·¹¤¹»¡º·£¸µ¡¹¸¢º¸£¸º¢¹¸£·¸¡º¸ ·º£¹´¶· ¸µ¤·µ£··¤¸¹¡¸¸£··¡¶¸¡¸·¡¹»£·¹£µµ ¸»¶···ºµ¡·¸£´·£·· ··£µµ¡¸»£´··´¡º·¡·µ¶³··´···¢··¶´·µ¡µ·¸´²·¶³¡·³·³³µ¶µ·¶¡´±³³µ¯³´ ´¶ ³²´³·´µ´²¶´µ·³®¶¢²´¶µ³´³±³°³±²²´³³³¡´±³²¯³¡·±±³µµ¡²²³³±³°¶ ³³µ³ ²³£¶µ²³·³°³³³µ°°­³²®²²±²±¯°²°³±¬°°¯°³²¢¥¤ £¢¥ §¦¡¡¨¡¤¥¡ ¤¥¤¤£¡ ¢¥¥£ ¥§ ¢¤§¡¥¢¨¡¤¢¡¤¡©¨¤¦¢¨¡§¨§¡©¡¦¦¥¤©¡©§¤«¢ª¥¨ ©£©¤¨¢¬¡¦ ª¤©¢§ ¨¦¬¤¬§¨¥©¥¬¨¤¬¥«¤§¤«¤©£­¤¬£«¡«¥«¡ª¥®§©¦®¥¨¦¬¨®£­¦­§­¡­§¯§®¦¬¦¬§®¨­¨¬¦¬§¯§®§­¥®¦¯§®¥±©²¬¬¥®¨®ª¬§²©­ª¬ª¬¨¯¬­¨°©±«°ª±ª³¬¬¨°¨±©¯¦­¬³­³©²©°ª¯ª³­µ©±­°©³®´­³«´¬®¬±ª¯­¯­°®³¬³¬³¬´­³¬µ®³®µ­³¬³­³­²°´®¶¬°ª²¬¶¬µ¬³°·­³­³°³±³¬´¨´ª²¬®¢|§r {|~|klU[KwYKlSKbUKdOMbUOdYSf_Wn`SibUlWOfUSk[Wf]Sfd]llbloduqfttWqf[xUSn]Wnb`oiYnkYo]SrYQk[IiWDfQKdSSbb[gkxµÂÓ ¦Ü¥³ß¢·â¨ºæ¨¾ç«¿ì®Áë­Áí¬Æó±Ãñ´Åò³É÷´Åø·Ìù´Ìú¹Ñú¹Îú¼Òú·Ðú¼Òú¾Õú¾Öú¿Øú¿ÕúÁÜúÄØúÂÚúÃØúÁÛúÄÜú¿Øú»Ûú³Öú¹Ôú¿Ôú¾Öú½ÜúÁÜú½ØúÀÜúÂÝúÆáúÅáúÃÞúÈàúÅàúÅãúÆàúÄáúÅàúÆàúÉâúÆáúÊãúÊâúËâúËæúÌâúÍäúÌãúÌçúÍçúÎåúÏçúÒèúÐçúÑèúÐéúÒæúÐçúÐèúÑæúÒæúÒìúÌèúÏèúÐäúÎæúÊäúÍáúËäúÏäúÉâúÇâúÉäúÈâúÇáúÈàúÆàúÆßúÆÝúÃÜú¾Üú¿ÙúÀ×ú¿Úú»×úºÕú¹Øú·Ôú·ÒúµÑú·Ôú¸ÐúµÒú³Òú·ÐúµÊúµÐú¸Îö³ÌôµÌ÷³É÷¹Ëö´Èö°Çô¦Çï¡Èê¦Áë¦Áç¨¿ç¤Àæ¢¾âº×µÓµÌ¯Á¬Á§½¥·µz¨wx¡z£x§|ª~¯°«{¨tnolb~bw_zn`{tYun_rfUuiWrk]qnSq_Ok[OkUMfQIkSQ`SMfQKiMKdSMdIF`OM_QKgQKbQOdUS`SMgSQgWSfSMdUQiYQkYWi]Ylbbld_qn_ruiw u§£·¤¯¹£¹»©»¼£Á¾¨¾½¨Á½©Á¿¬ÂÀ«¾À§Ãº§¾À¨À¿§¾¾ª¾Â©Â½¦»½¦¿¼§Á¿§¿¾©ÂÁª¿¾¨¾¾¥Ã¾§¾¿¬¾À§Æ¼ªÀÁ«Ã¾«Ã¾¨ÂÃ¬ÅÁ«Â¿¬Â½¬¿ÀªÀ¼ªÁÁ«ÂÀªÂÀ®ÂÁªÂ¿«Â¿¨ÂÁ«Á¹«ÃÁ«Á¼¥¿¿©½¾¬Á½©½»ª¿¾«Ä¾ªÃ¾¬¿¾©Á½¬¿¾ªÁ¾¥À¼«ÂÁªÁ¾¬Á¿©Ã¾§Á»«Á¼¨Â¾¬À¾¤À»¨¾¾ª¼¾ªÀ»¨¿»¬À¾¦Á»§½¼¨¿½ª½¿§»À¨Á¿­Â¾«Ã¿¬ÀÁ¬Ã¼ª¿»¨¾º®ÃÁ«Ã½¦À½¬½À§¿À¬Á¿¬¾½¨Á½¨Á½ªÁÁª¾¾«Á¿¬Â¿¦Á¾«¿¼ª¿¾¬Â¾§Á¾¨ÂÁ©½À¨¾»¨Á¼¦»¹§À·¢½º©¿¼¦¾»©¾½¬½»¬À¼ª¼»¦¿¾¬¾»¦¾»¬¼¹¦¼»©¿¸§À¼¤½º¥¿¾ª»»¬¿»¥Á¸©¾»¨¼¼¦¿»¬¼º¥¾»ª¼º¨¾»¤¼»§¼¹£¾·¨½¼«¼¸¢½¼ª½½¥¼»¥»¹¦¼»¨¾¼¨À¸¦¼¸¥»»¥¾º¨»º¬¼»¨½¹¦¹·¨º·¤¾¹¥¹¹§¼·¦¼¼£º·§º·¨»·¨»¸¤º¶£»¸¥»·¦¹´¥¹¹¥¼¸¤½º¡¸º¦º¸¤¹¶¥¹¸¦»·¢º´¤º·¤¼´¦º»¦»¶¡¸´¤º³¹µ¢·´¡»·¦»³¤¸´¤¸µ¡¶¶¥¹µ¢»µ¢¶¶£·¶¢·´¡·²¦¸²£¸¶¤·´¤·´¡·µ¥·¶¥»¶¤º·¤µ´ ¹¶¢¶´¤·¶¥·³ ·¶¡µ³¢·µ¢º²£·¶§·¸¤»³¤¸´§¸µ¥·³ ºµ¥³³¦¹´¹µ¡´µ¢·³£·´¢¶³¥¶³ ¶·¶³¤´³ ³°¡³ £¡ ¡¡ ¡¡ ¢£¡ £ ¥¡££¢¡££¡¤¢ £ ¨¡¨¤¤ ¦¤£¤ ¥ ¦¢¦¡£¢¢£¤¥¥©£¤£¥¤¥ ¨ ¤¥§¢¤¥§¥¦¢¦¦§¡§¥¤£¬¦¦¤¨ ¨¢§¨¨¤¬¡§¢§¢§¥§¢§¥«¦ª§¨¦ª¡©¥®¥§£§ª¦£©¦ª¤¨¨©§«¡¬¥ª¤¬¨«§©§¬¤¯««¥ª¥¬¦«¥ª§«©««­¤«§¬¦«§¬ª«¨©ª¬©«ª¬«­««©«¨¬§®«¬«±©««¬©¬«®ª«§°ª¬«ª«¬§¬¬¬­¯«¬®­«²­®«®«¯«¯¬««¬¬¬§¬­¬©«¨¦q¡{gw|qwY[KuQFlM?_SD`MFYQ?YMDUQM[]I]UOd[MbYIdYFdYMbSK]YUdd_gnYno`qnWlbMi[Mg]Q`YYliOgdMf[FiQ?bQB]WF]KF_[O_o[gtw¤»Ç Ó©Ü¬Þ¡µá¡³â¦µæ¢¸è§ºé¬¾ì¬¾ð¬Áó®Âò·Æö°Ãö²Çø´ÊùµÊúµÍúµÎú¸Ñú¹Îú»Îú·Ôú»Ðú¾Õú¿Ôú¾Óú½Ôú¾Õú¼Òú»Õú»Ôú³Óú°Ñú·Ñú¹Óú¸Òú»Õú¼Öú¾ÙúÁØúÁÜúÃÛúÂÛúÁÝúÃßúÀÝúÂÝúÃÛúÃÛúÃßúÄßúÇÝúÊáúÇàúËâúÊáúÆàúÊáúÌãúÌäúÍãúÎäúÌãúÑæúÎáúÏæúÌæúÍæúÍâúÌâúÌâúÊäúÊãúÊàúÌâúÊâúËáúÈàúÇáúÉàúÆÛúÈßúÆÝúÆáúÄÜúÆÛúÄÜúÁÜúÄÚúÂÛú¿Ûú¿ØúÁØú½Øú¾Õú·ÓúµÔú·ÑúµÒú³Ðú³Ðú¯Íú²Ïú³Îú²Êú°Ê÷²Êú´Ë÷²Êõ±Êö°Çõ²Æõ°Çö²Ãõ®Æô°Éò«Ãð¤Åç¨¾é¥¾å£»ã¥»æ¡½åºÝ·Ò±Ì­ÆªÄ£À¸|±x¬q§or t¦u§t©~®x©x¥tng`b~|[{wUxqYogSriUqbQkgSkfSkdQl]KfUD`OKdQF`Q?]O?[SBYMD_ODWOI]KI[SB[Q?`MBYQFUUI`OB`QF]QF[SFdQF]SM[WQ`_Qb_WgfYirYqqkzu ²©¸³¸ µ¹ ¸½£»½¤Á¾¤½¼¡¼»¤¹¾¤»¿¢¾¹£½¼¤¸»»¼¢»½¢»¼¤¾»¢¾»£º½¡»»©»½£½¼£»¸§½¾¦»»¥»º¢¾» ½¾¦¼¾¨¿¾¥»À£»½¥½¿¥º»¦»»¦¿½¢¾¾¦½»§Â¿¥»»¥¼¾¥½À¦¿¾¡¹»£¾»¥¿½¥½»¥»¼£¾¾¦¼¼¤»¾¤¾»¤¸¼¥¼»£¼¼£»¹¡¼»¢»º¡½º¢»»§º»¤»¾¤¼¾¦¾º¥»¼¦»»§»¼£º»¥»»¦»»¢»»¥¹»¦»»£»¾·½¤»»©º½©¾¾©º»§»¾¤»¾¦»¹¤»»¦½»£½Á¡¾»§»¼¤»»¥¾¹§º½¦¹¼¦¾¹¥»¾¥½» ·½¡»»¤º¾£»¾¨¿½£·»¤¼¶¥º¾£»»¥¼¼ ··¤½¼§¹º¢»¹¤º¹¤ºº£·»¡¹º¥º½·»£¹º£·¸¢º½¤ºº¥¸¼£¹·¡½»£¸¸¥¸¹¦·º£º¹¥»·¡¸·§¸·£¸¸¡·»¤º·¦·¹¢´º¢µ¹¡·º º¶£»¸¥¸¸¡¸¸¡¹º¥·»¡¹·¡¶¸¦·¹¹¸£»º£µ» ¶³·¸¦·¶···µ··¢·µ¢·· µµ³µ·¶³¶·µ¶· ··¡··µ·¶º ·³·µ´¶³¸¢·µ ³´ ·´µ¶µ´ ³²¶¶¶¶³µ¶´ ³³²´´³²±³´°³³±±µ³°·² ³°®³µ²°·²µ³´°³¡µ³¡±µ¯´°±²³±±°´´²³³³°²°®³°´´±±´´¶°µ´³²´²°´°´°¯¯³±­³¡³±±³ ±°°´³°±°²²®®µ¢¡£ ¢    £¡  ¢¤¢¢ ¤¥ ¤¦¥¡¢¦¡£¥¥£§¨¤¢¥ ¦£¨¢¡¥¦ §£¤¦¢©¢¦ §¤¨¡§¤¤¢«¡©¡¨£ª£¬¤ª¥¤©¤¥£¬ «¢©¤¨¡¨¤¦£©¤ª¥¦ «¤«¤¨¥§ ¬¤©¥¬¥¬¢¨£©¦¬¦¬¥¬¤¨¤ª¦©£«¤¬¥ª§ª¥­¦¬¦­¢¯¦¬¬¬¥®©«¦­¥¬¥¬¨¬¥¬¦®¦¬©°§¬¥®ª­¤¯§¬©¬§±©®ª®§­¦®ª¯§®©®­¯¨³ª­«®§¯«°¬¯¬¬¬²¨°¨±«¬§³¬°¬¯¬²¨±¨³¨¯¬®®³¬¯¯°¬¯®±°±­²¬³®³°²«°°²®´¯°­°®³­±°±¬³¨³®³®³®±«´¯³¯´°´¬³§³¬²®¯¬²§¨w zw|~kg[[OuSQiYMiSKbSQ`YKbWOi]WidQk_Ul[[g[Sf]WiWSfUWgf[gigiobrxktt]r`YofUrg[ib_oi]lfSlYOlQBkQOb_KdOMb`[i|or{®ÃÏ ¨Ü¦±ã¥³â¨ºä§»ç¬Àë©¿é¬Ãí¯Àô¯Äó³Æò³ÊöµÈ÷³Èø·ËúµÍú·Íú»Òú¼Ïú¾Óú½Ïú¿ÔúÀÖúÀØúÀÚúÅÙúÅÚúÂ×ú¿ÙúÂÜúÁÙú»×ú½Ûú½Øú½Øú¾Øú½Öú¿ÛúÂÛúÇßúÅÝúÆßúÊãúÉáúÉßúÉáúÅâúÈáúÊâúÈâúÈäúÈäúÎçúÎçúÎçúÍäúÎçúÒçúÒçúÐäúÓæúÓëúÓèúÒçúÒæúÕëúÙíúÒéúÖëúÒéúÐéúÒêúÏêúÐèúÐéúÍæúÌçúÑæúÏéúÌçúÎäúÌçúÍäúÍãúÊãúÉäúÈãúÅáúÇßúÌáúÊàúÁÞúÃÜúÂÝúÁÛúÁÜú¹ØúºØú»Õú»ÒúºÖúºÖú·ÕúµÐú»Òú·ÎúµÐú¶Íú·Ìú¹Ìø¸Íø³Ë÷³É÷¶Íù·ÌöµÌø´ÊøµÈó¯Ëê¦Åî¬Ãé¨Ãê¬Áè«¾ä¥Áä¡¼Ú¹ÐµÊ±Ç¬Ã¨»¢´¤®|¬xwz«¬z³°±¬~©z¡gioidu`{l[i[riYl`YrbYlf[r_Oo[MkUWkSMiUMgSQ`UO`SOgUW`SO`QKfWQ[OMfMMfOO`QQiSMfSQbWQgWQk[QbSSdQQk_Si][i][qnfutg~|~¥¢¤¬¢«º¤·¹©»»¨¿¼«Á¾¥¾½¦¿¾¥Á¾ª¿¿¨Á»©Â¿©¿¿©Á½§¿¿©¾¿«Á¾ª½¾¥Á»ª¿¼¥¾Àª¿¿§¾¼©¿¾§Á¿©Á¾ªÀ»¨ÀÁ¨ÀÂ¬Á¾°ÁÀ¬Á¾¬¿Â«ÃÁ«Á¿©¿¼ªÂÁ¬ÀÁ¬À½©Á¿ª¾¾¯ÂÀ©ÀÀ¬¿Á¨¿Á§Á¿ªÂÀ¬¾¾ªÂ¾¬ÀÀ¬À½¦Ã¿¨Á»«¿¼ª¿¾©¿ÀªÀ¾¬½º¬¿»§Á¿©¼»¨Á¾®Â¿¨¾À§Â½¨¾¼¨À¾©¿¼§¿¼¯¾¾§¾»«¿¼§¾¸©¿»§½»ª¾¼ªÀ¼®¿½®ÂÀ¬Ã¼¬¿À¬¾¿¬¾»©ÀÀª¾¾ª¾¾§Á»©¾¾ª¼½¬Ã¾§À½©¾Â¬ÀÁªÁ¾¬À¾©À»§ÁÀ¬ÁÁ¨¾½«Á½¬¾¼©Á»¬»¼©¾¼¨Á¿¨À¾¬¿»¨¾»¥¾¾©»½¨Á¹¥¾¿«»¸¬Á»¥¾º¨½½«¿»¨¾º§»»©»»§¼»¨¿»¥»¼¦»»©¿¿«¾º«»»¤¼¾«¾º¨½½¤¾¾¬¼¼¨¿º§¼¹¥¾»¤¿º¬¾»¥º¾ª»»¦½¹¥º¾§¾·¦»·ªÀ»¨¹»§¿»ª»»§¼»£¼º¨¿·§¼»ª½»§¼º¥ºµ§º´¦»»¦»¹¦¸·£»º¦º»§»·¤¸º§·¼©º¹¤»´§»¾¦»·¤ºµ¥»¶¦»·¥»·¦¶º¤¹¸¥º¶§º·¡·¸¤»µ¥º· ¸·¤¹µ¡¹´£»¶¡·³¶·§¸´´µ¤¶¶¡µ·£·´ »³ ¶³£¶·¢¸µ¤¹³¥·´£·¶§··¥¶µ¥º³¢¸³¥¶³¸±µ³¤´·¹²¡·¹¶µ£µ³¢·³¤µ´¡µ¶¢·¶¥¶·¡·³¢·°¢¸·¡¶´ ¹³£¶³¡¶³ ·³¢¸³¤µ³ ³±¡³¶£³¯ µ³µµ ¶±¤³³¶ ¢¢¡¢¡¡¢¡¡ ¡¡¡¡¡¡¡¢¢ ¡¡¦  ¥¢££ ¢¤£ ¤£¡ ¥ £¡¡¢£¥¤£§¡¦¢¨£¡¦¡¤¦¦£§¦£¤ §¥£¤¡¨£¦£¥¢¤¢¤££¢¨¥§£¥¥¨¤¦£§¥§£¨¥¥ ¦£§£©¤§¤§ ¨§§¤¨¦¥©¨¦«§©¥«¤ª¢ª§§ª©¦¬§«¨«¦ª¥«¨¬§¬§¬¦«¦¬¨¬¦©§ª§«ªª«¬¥¬©ª¨§««ª®©¬©ª¨¬¦«§«¬®§­©¬«©©««­§««¬«ª©°§¬ª¬©®ª®¬««­«­©¬«¬¬®¨¬«­ª¬§°«®ª±¬¬«­¬¬£®©¬©®©¨z¢~iqtrz]YD|MDkUDbQD`SIWS?SQFYMD]_Q_]M`YMdYI`YM`QB]SF]SMYYQbk[doYnr[nqUo`QkYKk`QbdQkdKiWFdW?_O:`K?[YDYWK`dYgkn´ÈÔ¦Ù®à£³â¥·â¤¸ä£¸è¦»è¤¼ë§¾í©Áï¬Áó¨Áô®Äõ°Æö³Æú³Èú³Ìú´Îú·Ïú·Ñú»Ïú»Ñú»Òú»Óú¼Òú¾Óú¾Õú½×ú½Öú¸Öú·Õú¹Òú·Õú·Óú¹Õú¸Ôú»Õú½×ú¾ÙúÁßúÃÛúÁÚúÃàúÇßúÆàúÃáúÃÜúÃâúÆàúÆÝúÊàúÊáúÍâúÌâúÍâúÎäúËçúÍçúÌãúÒáúËäúÏåúÎãúÍãúÏçúÓäúÒæúÓêúÔçúÎçúÌéúÎæúÍãúÌäúÊäúÌäúÌæúÊãúËäúÌãúÈáúÊâúÊáúËáúÆàúÅàúÅâúÅÜúÃÜúÆÛúÂÛúÂÛúÀÛú¾Öú¾Õú½Öú»Ôú¸Òú·Ôú¸Õú³Ðú´Ïú·Ðú·Ðú¶ÍúµÌú³Îù®Ëø³ËùµÉö°Éù²Êø³Çõ°Éø°Çö²Éö³Æõ°Çó¨Çî§Ãê¦¾ç£Àé¥½æ¤¼æ£¼áºÚµÑ±Ê¯Å¨Ã¢Á¡¸~³t©t¥otªz©|²~³z®~±|©x¡ig`_~YztStiUqlSo`QgdMk`Od`Og_KiS?dSDbUF]Q?`SB]QBYOF`QI]OD[KB_Q?_S?_OI_QBYQIbMF_O?_SI_UF_QD]YD`SM]SM_WI]_QddUnwbuwr|¡xt«¥¶¡¯¹¡µ» ·º¡¹½¢¼½¥»º¥¾»£º»¤»¹¡¸·£½¹£¹¾£»¸¤»º¡·¾£»»£»¹¢¹»£¸¹£»»£¾¼¡½¼¤»»£¹»¦º¾£À¼¦¼»¥»¾¤¼½¡¼¾§¾½©½¾¡¹½¤»º¦¾º¢»º¥»»£»¾£¾¾§»½¦¾¼£»»£»½¦¾½¥¿»¦½¼§½¾¡¼¾©Á¾§¾½¥¾¾ »À£»º¡½» »¾¥¼¹£ºº¥»¾¦»½¤·½¢º½¤·»¡»¸¥»¼¦»¼¤»º¥»½¦¹¾¦»¸ ½»¡º¾£¹¸£¼»¤º¹£·½¤½¾¦¾¿¥»º§¾º¥¼¾¥½¼£¼»¡»»¦»¼¤¼»£¹»£º¼§»»£¾¹¤¸»©»¿¤»»¤º»¥»»£¼»¤»¾§¸¼¡¼½¤»¾¢¹¼¡»º§»¿¨»º¡¹¸¦»»¤»º¢»¹¡»¸£·»£º¹£º¼¡º·¤¹»¡¸»¢¸·¥¹¸£¸·¡¸¹¦¸µ¡¸¹¡»»¥¸·£¹º¨¹»¢¹·£º¸¥·º¦¹»¡··¤¸º¸¸¥ºº »µ¢·¸ ¸·¡¹¹£·µ¢·½¢¸¹¡·º»¶¡¶¸¡¶·¡µ·¡ºµ ·¸¡¶·µµ ¸¶µ³µ·¢µ·£µ¸¸µ ¶· ¶µµ··µ£¶··µ¡¸·£·»µµµ·¡´µ·²¡´´µ·¡²·³´¸³ ³¹ ·µ µ¹±³·¶³³°²µ±³·²³³³²²³´´±³°´°³²°³±´±³³¯²³°±·¶ °µ¶±³±´³³²±°±³³²°°³³²°°±°³³±±±´°²³³°³³¯®°°±´®°³²²®²³¬²°²°²°®µ®®®¯¯°  ¢  ¤¢£¢¡  ¡¢¡ ¡¢¢¡ ¥¤¥¤¡¤¤¥¥ §¥¡¥§§ £¤¤¡¤¤¤¤§¤£ ª£©¢¥¥¨¢¦¡¨¡§¢¬¡¥¦£¦£¨¡©§¡©¢¨£ª ¥¦¬£ª¢¨¢§¥¬¤ª¤©¢©¡¨¤¬£­ «¤©¤«¦ª¦ª¤¬¥¬¨®¥¬¥ª¨©©§¢«¦¬¥¬¡¬¦¬¦¬¦«©¬¦ª£©¨¬ª«¦®¤©ªª§¬¨«¥¬¥­§ª§­¦­§©§­¨­¦®©®©¬¨®©¬¨¬©­ª­©®©¯¬°¬¯¦²¬­«°¨²¬°¨¬§¯ª±­°®³¨°«¬©°©¯°³¬³ª°­±¬³¬°¬­­³«±¬°¬³¬³¬°¬²­¯®µ¬°¬­­²®±¬±©³­±¯³¬³±²¬µ±´±´¯³®³±µ°³ª®©²ª³®³¬°«¬x¥rzxw{[WF~QMkWIfSQiSMbUM_MQbWUbYWffQf]Wi[UbYQkOMbSM_SQ``[fn`ktfowguqWu_Sq_Mn`[ll]odSuWMg]QiQBfKKg[Qb][kxio|{­¼Ò¤¤Û£¯Ý§·ä¦¸æ¨»ä©¾é­¿ë­¿í¯Àï®Àò¯Âò°Çõ²Éô³Êø¶Éú·Èú¹Íú¹Ðú»Óú»Îú¾Õú¿Õú¿ØúÁÖú½Öú¾ÖúÂÙúÂÚúÅÚúÁ×úÀÙúÄØú¿ØúÂÛú¼ÛúÀÛúÃÜúÃÝúÃÜúÅÜúÆÝúÅàúÉãúÉãúÌâúÊåúÍæúÌæúÉâúÊâúÎæúÑåúÓçúÕëúÖéúÖêú×êúÖëúÖíúÖíúÕêúÒëúÓéúÕçú×éúÕëú×ëúÙìú×ëúÚêúØìúÖìúÓêúÕíúÕéúÑéúÐèúÌèúÐçúÑêúËêúÏæúÌçúÎçúÍåúÍâúÌãúÎåúËãúÃàúÆÞúÈâúÀßú¿ÛúÃÜúÅÖúÂÙú¾Øú½Ùú¾Øú¾×ú»Òú¼Óú½Õú»Óú·ÓúºÒú¹Òú·Òú»Ïú¶Íú·Ðú·Îú´Î÷´Í÷µÉ÷¶Êö·Ìö´Éô°Ìñ«Èê©Æí«Ãê°Ãí¦¾è©Àç¥¾á ÁØ·Ì³Ê°Ç­Ã¨¿¢» ²°w¨z ~¬±°±³¬~¦uqil`~`~o_|kYtiUqb[n`Wq`WnfUoSKn[Qi[QbOKkUO`UObSQdUSbSQdQQfYIgUM`WQb[O`WUfYO`SKd[Qf[QfQSg]QiYWfSSi[Ud`bii_orioui¡t°¤³¢¯»¨º¿¨»½¦¿¾¨Á¼¨½»§Á¾¨Á½§¼¾©ÀÀªÃ¾ªÀ¿©Â½¤¾¾ª¾Á©Á¾§¾½¨¾¿¦¿À©Ã¾¦¾¿ª¿¾¨¿¿§¿¾¬¿¿¦Â¿§¾ÁªÃÀ¨ÀÀ¬ÁÁ¯ÁÂ¬Ã¿¥¼¿­¾Á¬¿½§¾Â¨Á¿¦Á¼«Á¾¬¾Á¬ÂÀªÁÁªÃÂ¬¿À¬ÃÁ«½À¬Â½§¿À§Á½ªÂ¼¨ÁÀ¨ÁÁ«¿½ªÂ½¨ÁÁ«¿Àª¿¼«Á¾¬¾½«Á¼©¿Â«½¼¨¼¼®Á»§¾¿©¾¿¨¼¿©¿À¬Â¾©¾¾ª¾¿©¾»¨¾¼©ÁÁª»Á¨ÁÀ­¾½­¿¾¨ÂÁ¬À½¨À¾¬¿¿¨Á¾©¼¾¬Á½¤¾½ª¾»ª¾¾§»½ª¾¾¨Á¿¬¾½¨»¾¬¾¿ªÀ¾ª¾¿ª¿¼«Á»ª¼Àª¿»§À½ªÀ¼­¾»¬¿»¨¾¼©¼½ª¿¼©¿¼¦¿»¨¿¾¬»»§»¹¨Á½¦ºº¥¿¹©»½¨¾¼§¾¼§¾¼ª¾»¥À½§º¼§½¿¨¿¾¬»¹§Á¾ª¼½¨»¼¤Á»¨¼¼¥¾¹¥½»¦»ºª»¼ª½º¤¾»¬¼¶¤»»¨¼½¤¼¾¦»»¦»¼§¹¹©»¹¤¼¶ ¹¸¥»¹£»¸¤»·¥»¸¦»¸¥¼¹§¾¼¦»»¥»½§º· º·¥¼º¤·»«¹¹¦»·¦½·¥º·£··£»·¥¹·¢¹µ¥¹·¢¶µ¡¹·¤»¸¦··¥¹·¡··¨¶¶£¼µ¢··£¶¶ ¶·¦·¸¢µµ£¸¶ ·¶£¹³£¸¶¡¸³·³¢¸³ ·³¢¶·¢µµ ·¶¥·µ ´³¢·¶·¶ ·³ ¸³¦¶´§µ³¡µ³¡´µ£¶³¸±¡¹´£´­µ³¡¶³¤µ´¡¶·¦¹³¦ºµ¡¹³¡»³¡µ¶¢´²¢¶´£³³¤µ³¤´´³³³³¡·¶µµ¥°°·¯³²¤µ³µ¡  £    ¢¡¡£ ¡  £ ¡££¡ ¢£¢¦¢¢  ¡¢¡¥ ¢£¡££££¡¤¡¤ ¥ ¢¢¡¢¦£ ¤¡¥¡¦¢¥¡¦¥¦ ¥¦ ¥¡¦¡£¢¦¡¥¡¨£¤¦§¨¢¦¤¨¥§¡§¨§£¥¡«£¨¨¦¡§£¦¦©¡§¥¥£¨¥¨§©¡ª¡§¤§¤§¤ª§§§«¥§¦¤¥ª¤ª¦«¦«©¬§©§«¨«¥«¨ª©©¥¬¨§§¬£¬§¨¦ª©¬©¬§«¦«¨¬«©§®¨¬¬¬©¬¨«¬¬¦¨ª¯©¬«¯ª¯«¬©¬©¬«¬ª®ª®««ª®¬®®®«¬©¯¬®¬¬§±­­¬­¬®©¬®¬¬«§¬¬­ª«ª­|¤ontwzbqS{YDlK?bMDbQI[I?`S?]SDYQM]]ObbOdUIdUDbU=YK?]S?[MM]]S_f[brWgnYkdKlYIgWF`dQdbOk[KbYDgQ?]K?YD:`SF]bU`frw­½Ñ¤Ø¡­Ü ´à¡´å¦¶ä£ºå©»é¨½ì«»ï¨¾î­Áï«Áï«¿ó®Äõ±Æ÷®ÆúµÇú´Îú¶Îú¸Îú¹Ðú¸Ðú»Õú½Óú¸Õú»Óú¾ÑúºÖú¼Õú»Óú¾Öú½ÕúÁÙú½Õú½Öú¿ÕúÀØú¾ÚúÁÖúÁÜúÁÚúÄÜúÀÛúÅÞúÇßúÈáúÇàúÇßúÇâúÇâúÈàúÐáúÑãúÐèúÔäúÒçúÑëúÔéú×æúÑäúÕåúÑæúÏæúÐåúÒçúÒèúÒæúÓæúÖèúÔéúÕéúÕæúÔæúÒåúÎêúÒçúÒèúÏæúÏâúÌáúÊáúËâúÊãúÇâúÉáúÆàúÈáúËàúÆßúÁßúÁÜúÁÖú¾Üú½Üú¿Øú¾Öú»Öú»Õú¾Ôú»Óú¸ÓúºÒúµÒú³Ñú·Íú´Íú²ÌùµÌú³Ìú´Îù¶Èù¯Êú³Êù®Éú°È÷°Çø²Ç÷°Çö­Æõ®Ãñ©Æí¦Æè¤Àé¦Àé£¿ç¢Áå¹â¹Ý¸Ó´Ê®ÄªÃ§Ã¡»µ|±w­or¨wªx²z´x°z«x¬w¢lbg]xWztWxnQrbFnbQg_Mk`Ol_KdWI_SDdUD`Q?]KB[MB[OFYM?]UI]MB]QF]Q?]YQ_U?_MB_MBYQD`QK_[F`WFdIF`MI[SM_WK`YSd`Sgb[lw_nuw~i©««¶²··¹¤º¹¥»»£º½¡»½»»£»¼¤·»¡ºº£½»¤¸»¡¾»»¾£¹¼¢½»¾¾»¾¤»»¥¾¾¦»¸¢»»¼¾£½¼£»»£»¾£¼¸¦¼»¡½½¦»¾£½½¡½¾¢»¾¦º¹£¿½¨½À§º»¤½»¢º¾©½» º½¡»¾¥º¾¦¾»¥¾½¢¾½¢»¹¢»¼£»¿¥¾¹¥»»¦¼½£»¼¤»»§¹¾¤¹»¢½¹¥¼½¥»º¤»½ »¾£»»£º¼¦»¼¥¼»©»º¤½¾¥¼¾¥»º¡½»¤·¼§¼»£»»£º¹¦º»§¼½¤¸¼¦¾»£»½¨¾½¤»¸¦¾»£»½¥»½¢»¼¡»½¢¸»¢»»§º¾£»º¦¼¾¢»»¤»¼§»¹¤º¼¦»»¤·¸£¼¸¥¹»£¸»£º»¹»º¹£¹·¢»º º¹¡¹º¡»»©¶º ¹¾¹»£»·¢¼¸¡¹º ¸º ¸¸§·¹¸» »·£¸»¢¸¸£¸º¡»¹¢¹·¤·º£»·£¹¹¢¶º¢¸¸¸¹ ´»¢»·¥··¡¶· ··¡º¸ ºµ¡º¸¤·¹·¹¶ºµ·¸·¡·¶¶·£·¸··¸¸¢·ºµµ ¶··¹£¶µº¶¶µ£·º ´·µ·£³· ¸¶·¶µ¶¢¶²´² ´¸µ³²´¢·³µµ ´´³µµ´³²²³±´´µ²³µ´³¶´±³³´³²²²²²±²°±²´±µ³³²³³³±³³³¯³³¡´±²²´³²³³±³²±²²³­³²´±¯²°´³±±³¯°²²²³°²³¡­²²®³²¯®±°³°°¯±®°²®²®®¯®®°® £¢ ¢¡¡¥£¢¤¢¢¢¥¢£¤£ ¤ £¥ ¡¡¡¡¡§¥£¥¡¤¦¨§¥ ¤¡¥¤¤ ¥¨¥¨¤¤¡¥¡§¥¤£© ¢¡©¥§¡§¤¨¤¬ ©¢©¤¨¡¦ ª¤ª£ª¥©¥ª¡§¢¨¤«£¬¥¥¨«¤ª¢ª¥©¢®£¬§¨¤¨¡¨¥ª£ª¥¨§¬§ª¢¨¤§§«£¬¥¬¥®¨¬¦­¦©¤¬ª¬¦¬§¬¥¬§¯¦°§¬ª¬§¬©®¦®«­§«ª¬¦¬¦¬©°¬®ª®§°ªª¦¯¥¯¨­¨³ª±¨­ª±¨¬ª±©°¬±¬­­®©±«°¬±®­¬¯«¬¬±¬³­¯«²­­«¯¬²«³°±®²¨³«¯®³ª²¬®ª°¬²¯³¬³¬³¬³¬´­³®°®´¬´°´¬°®¶®³°³¬³®±­°©²«±­³®°ª®¦u{x|diYYMuSOnWOgWMgWOdWMf]W_][i_YibYgSSgSOkQM_OM_SM`MUb[Wid`gn]kk`qfSoYSl_UkiYli[q`Ml`QnYIdSKgMKf`Uduiot|·Ä¡Ø¢¨ß¨µä¦¼ã¨½æ¨½è¬¾ë®Áï®Åï¯Áô±Ãó±Åó°Æô¯Æó²Æú¶Ëú¶Ìú»Ìú¹Îú»Õú¿ÓúºÒú¾ÖúÁÛú¼Øú¿×ú¿ÖúÁ×úÁÙú¾Öú¿×úÁÚúÂÚúÀÙúÅÛúÅßúÅàúÇßúÃÝúÆÞúÈáúÅàúËàúÊàúÌãúÍãúËâúÊåúÌçúÊãúÎéúÒæúÖèúÑíú×ìúÜêúÛìúÒìúÖêúÕîúÔëúØèúÕèúÖêúÓìúÕìúÕíúÕéú×ìúØìú×ìúÖíúÕëúÓëúÔèúÒêú×éúÖêúÓëúÒçúÒèúÐêúÎçúÐæúÍçúÏçúÎãúÒäúÍåúÌãúÈèúÈãúÈáúÁàúÄßúÃÞúÃÞúÁÚúÂÜúÃÚúÁÛú¾×úÁÖú¿Ùú¼Ôú¼Õú·ÓúºÒú¸Ñú»Òú¸Ðú¹Íú¸Îú¹Îú³Ïø·Ëú·Ëù·Í÷µÍ÷²Ë÷¯Èô®Èñ¬ÇðªÇí«Åì¬Ãë§Áêª¿ç£¾Þ ¼Ý¹Ð¶È­É¬Ç¦Æ§º£º¡²~¢¬{ |­·ºº³³«ztnk|`zf~n[{iUufWw`Wo`Uo]Mn]Qi[OiUQbUKbOKbSO_SObSFfSSfSMdUSfYUfWWfYOdQMfQQfUKfSQb_QgYOgUWlWOdUSfYUgYYg_[nd]robtuotª¢¯®¸¥·¹¨»¾«½¾©¾½¦»¾§¿»¦¿¼¨À¾¬Á»¤¾¿¨Á½«ÁÁ¥¿¼©ÁÀ§¾¾§¿¹©¾½¨¼½©¿¼¨¿½©½½¬¾¾¤ÁÁ¨ÁÀ¨Á¾¨¿Á§¿¼«¾¾«¿¾©ÀÁ«ÀÁ¦ÀÁ­Á¾¬À¿«ÂÀª¾Á©¿¾¨À»¬¿Á¨¿½¨Á¾«¿Á¨ÀÀ§Á»¬½¿¨ÁÁ¨Ã¿­¾¿«¾¾¬¾½¨ÁÁ©¾½©Á¾©Â¾«¾»¥¾½§ÁÁ¨¾½¨À¾¬¾½©ÀÂªÁ¿©Á¼©Á¿¬Á¼ªÀ¿¬Á¾ªÀ¾©À¼ª¾Á¨À¿ª¿»¥¼À¬Á½¨¿½©Á¾«¿¿­À¾©Á½ªÃ½¬¿¿ªÁ¿¨¿¾¬À¼¨ÀÁ«ÀÀ©¿¾§¿À«¿Á¨¾¼­Ã½ª¾¿ª¾¿ª¿»¨Á½¬¾¼ª½¾§Â¿¬¿¾¥Â¼«¿¾ª¾¼­¿¾¬Á¼©½½¬À¼«¼¼¥À½¬¾¼©¼¾§¼¾ª¾º©Á¼ªÀÀª¾¹£Á»§»¼ª¿»©½¼¬½¼«¼¾¬¾¼©Á¼©¿»©»¾¥¾¼©½¹¥¿¹¥½»©¾»¦¾º§¾º£¾»¨º¹§¾»¥½¼ª¾»¢»¼§¾»¥»»¤½¸§¼»¥»º¦¼¸©¹»¥¼º¨»·¦¼·©»»¢º¶¥»»¦·»¥·¸¢¾»¤·¹¦¼¹§¼¼¥¹»¤»·§»º¤º·£¶µ£¼´¤»¸¡¸¸¥¼·¡¹·¨ºµ¡··¢¹·¥»´¤¶·¡»¸¥·³¤µ´¹³¤µ·¢¹µ¡º³¦·´¦µ´ ¸µ¹³§¶± ·²¡º´¥³³¹²£¶³£¶³¶± ··¡µµ£¸µ¥µ¶¥´´ ·² ¶³·´¢´³¡¸µ£··³®µ³¡·µ¥·¯¹± ·³·µ ·±¦¶µ¤¶··µ´²¢·µ¶°£·µ³³¢µ³ µ³¥µ± ³³¤´±¶³µ±³³¢²³²¡  ¡¡¡¡¡¡¡¡ £¢¢ £££¡¤¢¢£¢ ¡  £ £¢¨¡  ¢ £¤¡£ ¤¦¢¢¥¤¦¢£££¤¦ ¦¥¦ ¤ ¦¥¦£¤¢¤¦¤¤§¢¨¤¥¤ ¤¦¨§¨¤¦£¥£¦¢¦¦§¥¥¤©¤£§¨£¦¥¥¦©¡§¤§¨©¥©¥¦¨ª©¨¥«£©§©¦§¥«¤«¥¨©«¨§§¨§«¬§¥«§¨©«§¬ª¬¦ª§¨©¬§©««¤«©ª§¨¦­§ª«®¨¬¥¬©¬¨«ª­¬«©ª¨ª©¬«¬©¬¬¬©¬¬¬«¬­±¨¬«¬¬«««­¬«¬¬«¬­«¯©«¨­©©ª¬®¦ªª |§rqotnwU|[FtO?`MI]SB_UIWODYMFYbOW_Md]I`UO[U?]K?WK?WFFUIBYKFUUK]UM]_ObdKd[DgMFd_MbbIb_Fd_K`_B]WB`QD_SD]_Sdwdlr|§|µÈÚªã£¯à¥³ã£³ã£»åª¾ê§½ë©¾ï¬¾í©½í¨¿îª¿ï¨Âò°Â÷±Ã÷²Æú´Ìú·Ëú·Îú´Îú»ÏúºÓú¹Óú»Ïú½Ôú¼Òú·Óú¸Óú»×ú¹Ôú¾Ôú¾Öú¼Øú¾Õú¿ÚúÁÙúÁØúÁÚúÂÛúÃÙúÂÜúÁÝúÃÙúÆÜúÆàúÅÝúÇÝúÆÞúÌäúÎâúÊãúÌäúÎäúÑäúÔãúÕæúÔéúÐæúÒæúÌçúÐåúÐãúÏåúÎäúÏçúÏæúÎäúÓçúÒçúÐêúÏåúÌæúÌæúÍæúÐåúÏèúÐæúÌäúÎæúÐâúÎâúÈâúÉâúÌáúÊâúÊãúÈáúÊáúÉâúÆàúÂÝúÁÜúÂÙúÁÖú½Ûú¾Õú¾Öú½ÕúÁÒúºÔú½Óú»Òú¼Òú·Ðú¸Ïú³Íú´Îú±Ëú´Íú³Ëù´Êù³Çú°Ìö¬Êø±Èö°Æø²È÷°Æö¬Èô¬Åó¯Çô§Çî§Âë§¿í£Áé¢Áçºä»ãºÜ´Ö°Ê¬¾§Ã£Å¸¿³z´tw©z°¸»³´~®tdgf_{WzkOtiOkbIk_Kd_IfWDdWD`QD`O?[OB]WBYMD[OBWMDYS?]QD[SM]SF[WI]SF_O?]SFWSD]OD]WI]]IdQD`MD[OF_UKYUM`[M`]Qdi]iqYtzzn~£«¦±¨²°¼£µ¼¥¸¹º¸£¸»£¹¼»»¥»º¢¶¹¡º»£¼¹¡½»¹»¡»º£¹º¤¾»£º»¡»»¦½½£º»¢¸½¢ºº¥»¾¤º¾¤½» ¾¾£¼»¥½½»»¥¾»¤»¹¡½»£·¾¢¹»£»¼¦»¼¡»»¤¼¾§¾»¤¸¾¡¾»¤¹¼¦»¿£»¼§¼½¤»Á£º»£»»¤¸½¢¼»¥»»¡¹»£»»¢»»¤»º¤»»¡½¼¥º¾¤¼»£¸½¥¹¹£»½¢»»£»½£»¶¡½¿¢º¿§¹º¡»¼ »¼£»»»º À»¤»¼¥»»¤¹½¦»¾¤½¼§»½§¸º£»½¥¾»§»¼¥¸» »¾¥¹»£¹½£º¼¥º¼¢¹¾¥»º¤¹¿¥º»¤º»¤»½¤·»£»¼¤¹¾¤¸»¢»»¥ºº©»½¤»¸¥º»¢¸¹¤·º¥»¹¤¸»»¼¢¹¸§»¸¢»»¥½»¥¸»¦º¹¢¸·¡·»¥¹¹£¸¹¹»£¶·¡º·¡»·¡·¸ ¸··¸¢¸¹¤»¸¢¸·¢¶º£µº·¸¤¸·¡µ· ·º µ·¢··¹¹£¸¸¤·¸ ¹¶µ·¢·· ¸· º·¶µ ·µ¶µ¢µ´·¶ ´··· ³¶¸·³¶³´µ¸ µ´³·µµ³·¡¶µ·³¶µ¡·´³¶µ¶¡µ²·³µ³´µ±³µ²³³´³±³³³³²²³ ¯±´³±°®²´¯²²³µ´±³³±±®­³³®¯²¬±²°¶³²±±²±±°²®±³±³¡µ³²´²®³¯±®®®¯²²´²³±­±³¯²¯³¯´¯¬°®°®°¯¯¯¬±®®®°°®®²® ¡¦¢¡¡¡¢¢ ¢££¢¢£¢¢¡£¤£¥¡ £ £¢ ¥¤§ ¥¤©¡¡¦¥ §¤¥¡¤ ¥ ©¤ § ¦¡¨££¡ ¨¦ ©©¡£¤§¤£§ ¨¡ª¢§£«¥«¨ ¬£©¦¥¤¨¤¦¤¨¦ª¡©£«¦«¥¬¤ª¥©¤­¨¨¥§§¯£ª¦¨¨­¤©§«¥«¥­§¬¥ª¢¬¨§¤¬¥®¦©£¬§¬ª¬¥¬¤¬¤ª¦¬¤¬¥¬¨¬¦¬§¬©¬¨®¨¬¨¯¤¯ª®¨³¨­§­«¬«²£­ª¬¨¯¬¯ª¬«¬ª­©®ª°¨±©¯¬°¨³«°ª­¬±©®¬°¬±©°¬°ª²ª±ª­©´ª³ª­¨®¬¯¬³ª°­³­°¬°­³¬µ±°¬³­³°³¬³¬³®¯²³©³®´­³¯·¯³®±ª±¬³¬°®³³°©¬{§ozuurnYWIxQKiQKgWO`UO`SOdQUi_[d]UibUiUUkSIfSKbSO]MMbMM`SSb[Qb]Qk`Wi`Un[MkSUi`[ifWqdOi`SlYIi]KfYFdWQii`qqw{©ÂÓ¢¥Ü¨±å¨¶é¬½ç¥½èª¿ë¯¿î®Âñ±Áó³Áî®ÁðªÇð­Åñ¬Æò±Æø³Éú¸Ëú¹Ïú½Ïú¼ÒúºÔú¿Òú¼ÚúÀ×úÀÙúÁØúÀØú¿×ú¾ÕúÀÙú¾ÚúÃ×úÁÜúÃÙúÃÜúÇàúÅÜúÇÝúÆàúÆßúËßúÅáúÈáúÈáúÈáúÉæúÎâúÌæúÌæúÐæúÎéúÒëúÖéúÔèúÖëúÛïúÜëúÖîúÕìúÕíúÑìúÒêúÒçúÐëúÑéúÓëúÒìúÕëúÕîúÒìúÒìúØìúÔëúÒéúÓìúÙëúÕíúÔëúÖèúÒéúÑéúÔêúÎéúÍçúÐæúÎçúÌçúÎäúÌäúÊäúÈàúÈáúÇáúÃÞúÆÜúÃÛúÂÜúÃÝúÁØúÅÙúÃÙúÁÙúÁÕú¾Õú¾Ôú¹Õú¼Óú¹Õú¹Òú·ÏúºÓúµÎú¸Óú²Ðú´Ðú´Ðù´ÍùµËøµÌøµÌö³Èö¯Èõ®Êð¬Åð«Äð¬Ãî§Ãí¨Ãë¤¾ã¢¾ã¡½Ü¸Ð³Å­Ã¨É¨Ä¨Ã¢½¦º~¡­¡|®¹»µ·¡¬£toggbn_zo[tiWudQqbSn]Ql_MiSMlMMiQSdQKfWOgQQ`OMbYOgWOdQQf[QddQbUMkOMgQMdWMdSQgWSb[SlUQiUOgUMgSMdWSg`Yf]]rdiwzfxtr ~ ¯®¬«µ¤µ¼§º¾©¾¼¥¾À©½¿¦¿½¤Â»«½»¥Á»¨À½ª¿¾§Â¼ª¾¾§ÂÀª¾¾¤¿½¬Á½¨Á¿¬¿¿§ÀÁ¬¿¿©Á»¨ÁÀ¬Á¾¬¿¿¬ÃÂ¬¿»ª¾¿¥À½«Ã¾¬½¿¤½¾ªÁ¿¨Á½¨¾½¨¾Â¬Ã½¬Â¾¨Ã¾¨À¼¥À¾¬Á¼¨½¿ªÃ¿¨¿À®Ã¼¬¿¾«¾¾©À¼¦Á¾¨¾¿©ÁÀ¬Â½§Á¾¬¾¼©Á»§Á½«½¾ªÀ»¬½¾ªÀ½¤ÁÁ¨¿½¬½À¬¼»©Ã¾ªÀ¾¬Á¼§Á¾¦Áº©½»¦¾»¨¾½©¾¼©Á¾«À½ªÀÁ¨½»¬Á¾«¿À¨¿Á¥Á¼¨ÁÀ«¿¼ª¿Áª¿¼¦¿¾©À¿©¿¾«À¾¨¿½¨À¼¨¼¼§À¾©¾½©ÀÁ§À½¨À¾§¼¼¦ÀÀ¬¿¿«À¿¥Á¾¬¿¾¬¼¿¨½»¦¼¿¦¾»§Á¼¨À»¬¼º¨¼¼©¾¼«¾¾ª½¸«½»ª¾»«»¼¬¾¼¦»½¨¼½©À»¥¾½©¾»§½º¥»½¨¾¹§¼»¥½¼¦À¼¦»º¦½»¨»»¦º¹¥º»ª»»¥»»¨½º¥½·¥»»¥¼»¦»¸§½¹§½¸¥º»¦½¹¥¾¹§¸¼©¼¸¦½¹§º¼¨»¼§º·¤»¹§¹·£¹¹¤º·¦»·¢¹¶¤»¶§·¸¤º·¤»·¥»¸©¸·¡··¡··¦¼¶§º·£»¹¥¸³£¸¶¢º¸£·³§º´¡¸·§¶´¡¸¶º¶¢¶µ ¸·¹³¶± ·¶ ·³ ¸¹¶³···±µ±¤·´¡¹·¤µµ¤º¶¤¶³£´² ·³³³ ´°¢´³ ¶´¡³±¥·³ ¸³¥µ³£³¯µµ´µµ³¡´³¤µ³¸±¡µ³³³ ´²³µ µ²µ®·µ ³¯µ³¡¶®´±²³¢³³ ¶µ¢³    ¡£ ¢¡¡¡ ¡ ¢ ¢¡¡¡    ¡£¥ £¡¡¤¤¡£¢¢¡§¡¢¡¡¦££¡£ £¢¥££¡¤¢¤¤£¥¤¢¤¥§¢£¤§¦¢¢¦£¤¤¦£§ ¥¤¨£¨¦¤¥§¥¤£ª§¥¥©£©£¤¦¦¥¦¨¥©¦¦­§¨§¦§£¤¦ª¦¥©¦¬¥¤¥¨¤¬¨«¨¦«©¨¨«©¦©§§©ªª©«©¨ª©©¨«¨ª¦¨§«ª«¨«§­¨©©«§©ª©¬¬§¬¨«¬¬©¬ª­«©ª«§­¬¬©««©¬­­¬©¬®¬¨¬«¬®­ª¬­ª¬«£­«§®«­«««¤|£oirn~lw`~[KtM8bO?]IB[KDUO?WOFUKIYYK_bIYYK_M:YSBSMDSF=SF?MMBSDDUYISUI]WI_UIYYB_QId_OYgMd]I_WD_UD]SBYSDb]Q[r_kkr|°ÃÒ¢Ü¬ß¢µæ£µç¥»ç§¶ç«¸î©½ì©½ï©¾ë¥¾î§¿ëª¾ð¨¾ô¬Âô®Àø²Æú°ÅúµÊú·ÎúµÐú¸ÏúºÒú»Óú¹Óú»Ðú¾Óú¹Ðú½ÒúºÓú»Öú½Ôú¼Öú½×ú»ÙúÁÖú¿ÙúÃÙúÂÛúÃÝúÂÛúÅÚúÁÜúÂÛúÁÝúÈÛúÊÞúÈâúÌâúÌàúËâúÌãúÕâúÖçúÕéúÒçúÓæúÖêúÓçúÒéúÒèúÍæúÓåúÏæúÒèúÒçúÔéúÐéúÏæúÏèúÏçúÏçúÎäúÌèúÓãúÓçúÔçúÏæúÌæúÎãúÍäúÎäúÎãúÊáúÈàúÌâúÉãúÈÝúÆßúÄàúÁÜúÃßúÅÛúÃÚú½Ùú½×ú»×ú¾Øú»Ôú»Óú¾ÓúºÓú¼Óú»Òú¸Ðú¸ÏúµÌú·Ìù°Êú¶Êú³Ìú®Êú°Ëö°Ç÷­Èù¯Äø±Èö°È÷­Çö®Çò¬Çö¦Ãó§Ãò¥Âì¦Àí©Àë¥¾ê¢¾èºà¹ÝµÜ³Õ®Æª»£Å¦ÆÃ¡Á·z·z£q£³»´·«x£qid]|YzuSqnQqdMg`K`YId]B`YD`QD]KBYSFWQDYO8YMDYQ?YQD_YDUSFYUM[[FYUB[K?]QB[UFUQB_SKY_KYUF`MB`UDWQFUQFYYKU_O_`Wftbntb|~z­¢¥£³°¹°»¢·¸¥»¹£¸»¡º»¢½¼¤»»¦º»£º»¸»£»º¢¸¸º»º»¥»·¢¾º¢º»£¸º¢º» ·½¤º»¡»¾ º»¢¸¾£¾½¥»¼¡»»¥»¸¤·½¤¹»£¸»§¸º£¾¼¥¸»¢¼¾¥¸»¢¸»¢¹¾¥¹»¥¼»¨½¾£·¼¦¹»¤¾½¡º¾¤»¼¥¼¼£·¹¡·»¢º»£¹¼§»¼¶»¢¼½¤»»¥»¼¥»¼£¸º¡¹¼¦»¼¤¸»¡¹º¸»¢¸½¨»¼¢¹¼¤·»¡º»¥¹¼£¸»¸»¢·º¡º¾¥»¾¤»¼¦»»¤¹½¦¹½¡º¾£¸»¥·»¦¼½§¹¾£¼½¥»¾¦»»¢º»¤»»¤¶½¥º»£»»¥¸¹¦»¼¢º·¥·¼¦»·£»¼¡¹¼¥¹»£»½¤º¼¨º»¦¸º£º»¢·¼¤¸º£·º¢¶»¡¹»£º»¦ºº¡¹º¢··¤·½¢¸·¥·¸£¸» ·º¥·¼¡¹»£¹»¤¹¸·¸¤·¶ ·¹£µº¡¸¹¡¸·µ¹£··¤µ··¹¢¶»·· º¸³»¢µ·¶¸£··¥¸· ¹¹£²¶¡¶¸··¢¶´´µ µ·³¸µ¸··³·¡±³´¸·»¢´¶µ´µµ¡²··¶´¶¡µ¶´´µ¶³´¢±¶³´²µ³³³²³³³µ³µ±· µ±±±°²³´°²²µ¯±³µ³±²³´³°²µ³¯®°³³´±±³²®³±°°²°µ°±°³®³°®®¯±³¯²²²®²¯°²¬²±¯²­±°³¬¯°¬°¶®²®¯®³­°®®­±­¯«±®®­¯®¯¬±­¡££¢¤¥ ¢¢¡¢  ¤¦¤£¡ ¢¤¢¢¦¢¥ £¥§¡ ¥§£¦¨ §¥ ¥ £ §§ ¨¢¨¡¤ §¡¨ ¨¤¥¡¤ ¦ §£¨ª¤§ © §£ª£§©¦¥¦ª © ª¥§¥¬¤¥¢®¢ª¡ª¤«¤ª£©¢§¥ª¢ª¤ª¥©£«¤ª¨©¥¬¦©¦­¦­§«¨«¡©¤«ª¨¥«¤¬¤¬¤«©«§¬¥ª§¬ªª¦ª§«¨¬¦¬¦­§«¨­§¬¥«©¬ª®«¬¨ª¦°ª¯¬¬©¯§¯¨«©­ª®ª­¬²¨­¨¬¨­©°«­ª¯ª±ª­¬®¬¯©°«¯©¯¬®¯°«®®²ª³¬±¬°ª³©²©°®±­­¬²¬³®¯¬³®±®±®´¬±²°¬³¬¯¬´«¯®³®±¬±®±¬®«±¯¯²²¬°¬­~§~wq~xqu_WQ~QKnOOdOOdQIbQIbYO`YSd[[f`OiSQfQIgOMfMO_OFbMISMM_OQ`]W_]Qd[Sf[Oi[OfYSffYbfUd_Ql]OkSMdWOf[Qli`lnz~¯µÃ ¢Ö¤¦á¨´ä¦¸é¬»ê¦Áé¬¿ë¬Àð±Áï¬ÄïªÁí­Áð¬Æñ­Ãñ®Æó¯Æø±ÈúµÍú¹ÍúºÐú¼ÓúºÕú¼Òú¾×ú¼×ú¹×ú¼Öú»Öú¾ØúÀÙú¿Ùú½ØúÂÙúÁÝúÃÝúÅÞúÆÝúÅÜúÅÝúÆÞúÅàúÅßúÇãúÃßúÆãúÈâúÌãúÏãúÑçúÑçúÐçúÌéúÐçú×ìúØéúÔìúÖíúÖëúÜïúÛëúÚïúÝíúÛïúÙìúÖïú×íúÛëúØìúÖíúÖðúÑîúÕíúÖíúØìúØïúÖèúÚêúÚíúÕîúÑìúÓèúÒæúÓéúÑêúÎèúÐèúÏäúÌãúÎäúÎæúÊâúÊãúÊàúÆßúÇÝúÁáúÃßúÃÜúÁÙúÁÙúÁ×úÂÙúÀØú¾Öú¿Øú½Õú»Óú¾Ñú·Õú¹ÓúºÎú·Ðú·Ðú³ÌøµÐú³ÍùµÉú´Íù³ÌøµËù³Ì÷¯Ìö¬Êö®Æõ¬Éô­Èð¬Èï«Åí¨Ãì¨Âç£Áã¤¼â¡¹ÝºÏ²»¬Ç«Î©Ã¨È¦¾¤»¡¹¡³»¹º° ¦xxokbz_~q[|iYxdQl`Qr[Mk`OiWQlSKfUS`QOfWKgSQ_WQgUQb]Qd[SfWQk]Qd[UgSKbQObWOgMKk[Sf_Wd]QnSOgWMdMQbWQb]U_Y[ib[lofo{fruµ©¦¬´µº¨·½«º¾£¾¿¦Ã¾¨¿¾¨½½¨Á¿¬¿¿©À¹§½»©¾»¥À»¨À¿£¿»§¿¼¤¿¼¬¿¼©¿¾¦¿¿©¿¾©¾¾¨Á½«¿¿«¾¿ªÁ¼¬¿À¨ÀÀ¨À¹«½¾§»¿¤Á¼¬¾Á©¿À©À¼ªÁ¿«¾¾¨Á»©»¾ª¾¼¦¿¿«ÅÀ¬¿¼ªÀÀ¨ÁÁ«Á¾ª¾½©¾À¨À¾¥¿¿©Á½©¿º§¿½¤¿¿§Á¿©À¿ª¾¾ª¾¾¨¾¾«¿¼¬¾¼©¾¾ªÀ½¨»¿¨¿¿«½¿¨¾¾®Á½§À½§Á»¬À½¦½¾¬¿¾«¿¼ª¼Á¬Á¾¬ÁÃ©À»ªÁ¾©¾Á«ÁÁ¬À¾¨Á¾­ºÁªÁ¿©ÂÀ¬¾¾«Â¾¬Á¾¬¾¾¥¿½¨À¿­Á»§¾»¥¿½¬½¿¨¿¾«Á½®À¾¨½»¨¿¾¬¾¿©Â½¨¿¼§¼¾§»»¬»¼§À»¨¼º¦¾»¨¼¾¬¿»§¼º¨¾¾¥»»¨½¾¦¼½«¾»¥»º¦»»©¾»¦½¼¦¿»¦º¾ª½¸¥ºº¢¼¹§»»¤½»©¼¾¥º¸¦½¸¤½»¦º»¢¾¹§À¿¨¾¼¤»¹¦¼º©»¹¨½»¥¼»¤¹¹§½¼ª»¹¤»»¦¼µ¥½º¤·º¥»¸¥»·£¹»¦»»£»¸¤º¹©»º§º·¦¼»¦¹¶¡¼»¤»»§¹·¥»¶£º¶¤º¹¥¸¶¢¹·£·¹¤»¶¡»´£¹³¢´´£»»¶¶¤¸³¢·µ¢·µ¢µ´¡¸µ¤·¹¤·µ·³ ´³¡¸³¹´¡¶³¥·µ ¹±µ´£··£»´¡··¢µ³¤¶°µµ£µ³ ·´¡·´ ´³´´¢¶³¡¶³·³´´µµ£³±¢¶³³³ ³°µ° ³¯²¶³° ³´ ³°³²µµ ³°¶±³¶³³¡³±¡´²³³¡¶²´° µ   ¡¡    ¢  ¡¡  ¢¢¡ £¡£¡¡£¡¡¢¢¤¥£¡£¢¤¢£¢¡¦¡£¡£££¤¥££ ¤¤¤¢£¡¥¡§£¡£¡§¢¤¡¥¢¥§¦¦£¤¥¥§¥¡¡¡¥©¦¤¥£¦©¥§£¤£¥§¢§¦¥§ª¦¦¤¥§£§©¦«§¨¦ª¤¨¥¨§§¥©¨«¦¦¨¨¤¦§£§«§§§©¥¥©§©ªª©§«ª¦«¨ª¨¨§¬©§ª¨©¨©©«©«©©§¬©ªª¬ª­©­¬¬©®©®¬¬­®«­«­«ª¬¬¬¬ª©¬¬­ª««©°¤ª««§«ª©¬«§¦tlltqbqUxY?nK=[OBYMDWFBOI?YUFWYKW`M_UI_SF[I?YI=QK?QD5SD8QIBOQDOUDYQKUUD[SD[YFWWIbYM_dI[WD_Q?YQ?[YIYS?]i[bno{z°¸»Ì¢Ý¡­ß °æ¦¶æ¥¸ç£ºèªºì¦½ê¦¾ë£ºí£¾î¥¾í§¾ñ©¾õ¬Ãõ«ÄúµÆú¶Êú±Êú¶ÏúµÏú·ÑúµÎú·ÑúµÏú³Îú³Ðú·Òú¹Îú»Ôú½Õú¾ÔúÀØú½Öú¼ØúÀÔú¿×úÂØúÃÜúÁØúÀÜúÁØúÁÛúÁÚúÉÝúÈÜúÎßúÊÝúÊàúÄàúËàúÎáúÏäúÒäúÔçúÖæúÖèúØçú×çúÖèúÓèúÕèúÔèúÔåúÓèúÑçúÔçúÓæúÐéúÑéúÑèúÓæúÎãúÒçúÕæúÔåúÏäúÒäúÐæúÑæúÏâúÑáúÐåúËãúÊßúÌâúÉÞúÄáúÇàúÄÝúÃÜúÁ×ú¿Øú¾Ùú¿Øú½Öú»Óú»Öú¼ÒúºÓú»Óú¼ÒúºÐú»Ìú¹Îú·Êú¶Ìú¸ÌúµËú´Îú³Ëú°Ìù±Èù°È÷®Æö¯Åú±Å÷®Äù®Çö¯Æõ¬Æõ«ÆóªÁó§Àñ¥Ãð¥Âî§½é¥Àè¡»è¡ºà¹ß¶Ü³Ô­»§Á¡Ê¤Å£È¢¾¡·»z®z®~¸¸·°{¥qondWwUxwYrkMldKg_I`YF`[I_U?YQB_I?YQBYK?YOFWWDUUF]WK[SFWUIYQF[YF[KDYI?]Q?UQFYWDYSK_UMYSD_SB[UDSQD]QF[[O]UF_dUkqYknkwq¯¡¥¤°ª¸±»¦µ¼ ·½¡¹º¹¾¥º¸¢»½£¸¼£¶¼¡·¹¡º»»¼¡º»¢¸¹£»½¢º»¤¸º¡¹»£º»£¸½¤º½¢·¹£·¼£¼»¥·»¡¸½¡·½£¸¹£¹¼¥º¼¡·»£»¼º»£¼»§½¼¤º¾¦¹¼¢¸»¢¹»£»»¡»»£»»¢¹»¤¼»¢¸¾¥º½¥»»¡¾¼¡¸¼¢·º¡º»¡¸¸¸¸ º»£·º£·»¡·»¥·»¥»¼£·¹£º»£¶»£·¹£»»¡¸¾¤½º¤»¸£¹½¤»¾¦»¼¥¸» »¸¢¹»£»»¥·½¦»½¤¹½¤¹½¥¹¼¢º»¤º»£»½£·º§»»¥¼½¦µ¾¡·»¥»º¡¸½¥¹¾¤¸» º¾ µ»¤»·¡·¹¥·¹£·»£·¼¤·º¢¹¸£¸¼§·¼£¸»¥¸»¢º»¡¹¸£¹»¢º¸£·»£¸»¡·¸¨»·¢»»¥´»¢¹¸¢·¸¢µ»·º£¸¹£¶¸£·¹¡¸»¡¸¸£¸·¡µ»¡¹·¤µ¶¤²¹£·¼¶¸³¸·º³·¡·º ¸´ µº¡¶º¡µµ µ·¦µ·¶·¢³·¡´¸¤´² ·º³·µµ³´¢±·¡µ¸·¶ ´·¢´¶£³·³»²´µ·³¶ ³´²··¶°¶¶¶²³°µµ·¡±³´´£³·´³ ³¶´°²·³¯²°²±²³°°³²¯´²³²²³²²³°³µ³¯¯±³³±²³ ²³°¯³²³³°´®®³°±³¬²²­¬®±®®°¯°¯³¯±²°±²¯¬°®¬®®°¯¬®±®®­°­®®«®¬¬¯«®¬«®­­­¬®®¢ £ ¡   ¢¤¤¡ £¢¥¡¢¥¤£¢£¡ ¥¡¡£¡¡¢§ ¢¥¢¢¡¢¦¦ ¤¢£¨¡¥¡¦ £¦¥¥¦¤ ¨§¡¤¡§¢¦ § « ¨¡¦¤§ ¥¢¥¤©£¨¥§£©¤¥ ¦¤¦¢«¡¨¥ª£§¥¬£©¡¬¥©¥©¦¬¥§¦¬¥¨¦ª¥¦¤ª¨«¦¨¥©¢ª©ª¦¬¢ª§¬¦«¤¬¨¬¥©¦©¦­¨ª£¬ª«ª¬§®¨«¨¨©©¥ª¨­¬®¥­§­«¬¬­¥¬¬¯§°¬®©¯§®©¯¬®§¬¬®¬­ª°¬²«¯©°¬ª¬¬¨®«­«°¬°¬­«¯¬¯¬°¨¬­¯©®­µ¬®¬²­°¬²¨±¬­­±®¯«¯¬­®±«³°¯®¯­³°²«³­³­®®²¬³©®¬²¬³­¬¬¯~¨u¤~utuwknU[FrOIbQKbKM_KM[QOdWU[YOdWMfUOb]KfQK`OB]QK_MK[KDUOI[UO[SM_WO`WQfUK`bMb`Qf`Qf`Ug[KkWIdSO[[QfbWlzin{|£«¼À§Æ¦ß¥¯á§·è¬¾ê«¼é¬¼ì°¾ï¯Ãì¦Áí§Âî«Àð¨Áñ®Äõ¯Ãõ°Æù³Èú¸Êú¹Ðú¹ÑúºÓú¸Ôú»Ôú·Òú¹ÕúµÓú¶Óú¹Òú»Öú¼Öú½Ùú¿ØúÆÚúÃÛúÅÜúÃàúÃÙúÇßúÄßúÈàúÅàúÆàúÃÝúÆáúÆßúÉâúÊáúÈÞúÌâúÍàúÇåúÑäúÒåúÕêúÕéúÙéúÓëúÙìúØëúÙéúÝêúÝëúÚëúÑíúÙëúÙêú×ìúÚëúÚíúÖïúÒêúÔìúÒíúÕèúÕëúÕëúÕëúÕëúØëúÒèúÔçúÖèúÕéúÒëúÒëúÐèúÌæúÎéúÊäúÈâúÇàúÇáúÆâúÅàú¿ÛúÁÖúÁÝúÀÚúÂØú¾×ú½Øú¾Õú¼×ú½Õú¼Óú¾Óú¹ÒúºÒú¸Óú»Ñú¹Ðú·Íú¹Ðú¶ÐúµÏú³Ì÷µÊú´Ëø³ËúµÈú·Ì÷´Ê÷®Ìö­Êô°Éó¯Çñ¬Åí¬Åï¨Ãí©Àè¤¾ã¤¾ä£»ß·Ö·È¯¿¨Í®ÇªÇ¨ÈªÀ¥Ã¢»¡©·½µ·¬{£wwrdbu]wlUwdStbQn[Mo]MfYOdQKbOIdWOdQObQIfWQbQMgYSf[O`WObKQiYSdWQdOIbQF]SOfUOb[SbWSdYMiSMbUU`OQgQMdWSb[Ogi_nolw|nw²¢¬««¬µ ²»¨¹º§»¾§Àº¨»¾§¿½§¿¿©¾¿¬À¾¤¾»§¾¾¤¾¾©À¼¥¼½§¾¾¨¿»§¼¿¤½¿ªÁ¾¦À¾§À¼¦¼¼¤Á¾¨¿¿«¼¾ª¾À©¿¾ª¾º©Å¾¬Á½¨¾¾¨½Á§¾¿¦¾»¨¾¿¬Á½¬¾¾ª½½©½¾¨À¾ªÂ¼¦¾¿¨¿Á©À¼ª¿¿§½À§¾½£¿¾¬Á¿¨¼º§½À§¾»¬¾»¨¿º¨¼»§¿¼¤Á»§¾¼§¿½¥¿½©½¾©Á½¦ÁÁ¦¾¼¬¿¼§Á¾¨½À¨¿¼¨¿»©¾¿¥À½¨¾¼¤À½¨¼º«½¾ª½¿«»¾ª¿Á©Á»¬½¿¦¾¾©ÀÀ©¾¾«À¼¬ÁÀª¾¿©¿¿¨¼¾©Á¾©¼»©»»©¿¾ª½»©¾¼¨½¿©¾º¨¿¼¨¾½¥½¼£¾»©¾¾©¾¼§»¼¨¼¾©¼¼¨»¹¨¾¾ª½»¨½¼§½¾¨¼¼«»»¨Á»§»»¨½»¤»½¨¸½¦»»¥¼¼©¼¿¬¾»¨¾¹¥¹¸§»·¥¾½§¼»©¹»§»»§ºº¦¹º©ºº¤¼º¨¾·¨º·¤º»¢¼»¦··¢½¸¢½¹¦º¸¦¹¸¥¶º¥»¼¥»·¨º»·¸£»º¨º¸¨µ¶§º·»»§¹»§º¶¥¹·¦¸¹¨º¹¤»¸¤·¹¤»»¢»· »½¤·· ··¥¹¶¢¸·¶¹¤·»¤ºº ¹´ ·²¥··£º³£·¶¢µµ´µ ¶´·¶¢µ´ ·³¥µ´¡¸³¡µ³¡³µ¡µ¶ µ³¥·´³±·µ³µ¦·³¶¶¢¶·¥´·¶µ¹· ·´ ´¯µ´ ¶µ£µ®¶³´°¡·²·±´³¤µ³µ³ ³±¤³°µ²°³´¬´³³²¢µ°³´£´¯³¯³®³²°±¯®±³¡²¯³®³¡ ¡    ¡ ¢¡ ¡¡ £¢£ £¡£¡ ¡¡¡¡¡£¡¡¥£¥¢¥¤¤¤¢¢¡¢¥£ ¦¡¢¤¢¢¡£¦¦£¡¢¥¢¦¦§§¦££¦¡§¤ £¤£©££¥©£¤¥¦¥©¤§¤§¦¦¤¨¤©£¥¢©§©¦¦¥§§§©¥¦§¨¦§©§©¦§§¦©¦ª©¨¥§ª¦«¥§©¨¥««©¨ª¨«¦©«©©¬ªª§©¦«¨««¨ª«©ª«¬«­©«©¬©¨ª¨ª¬ª¬«¬¬¨©­©«¬¬¬«©«¬«¬¬ª«««®¬¬¬­¬©ª¤¬«¬©©¬©««©¦uzdkkqkzf`IwO?`IBWF:YI?QMIUO?UYKWWKYUD_Q?[ODWK=WD?QD=KK?QD5KF?OMFOKDQOFSY?YQI[_IW[FYWD]_D`]?dQ?[O?[YMYfWd{`lwr¢z²½Ã¢Ç£Ö©Þ¡³å¦µå¥µé¦ºë§»ë¦»è£¸ë¤Àí£½ì§»ï£»ñ¨ÀõªÂ÷³Åú³Äú·ÌúµËú·Ïú¶Ìú¶Îú·Îú°Ðú³Ïú³Ìú³Íú·Ôú¶Òú½ÔúÀÖú¾Öú¿ÓúÁÖúÀØúÁÙúÃÖúÁÙúÃÛúÂÛúÃÖúÃÜúÂØúÅÛúÂÝúÄÝúÃÝúÃÜúÄÜúÇßúÇÝúÍÝúÑáúÏãúÑãúÑãúÍáúÓäúÐãúÐäúÕâúÔäúÓçúÐäúÔäúÑæúÔèúÓåúÓèúÌéúÏçúÒçúÏçúÎæúÏãúÎáúÑäúÐäúÎçúÓãúÒãúÐçúÒçúÌåúËäúËáúÊâúÈáúÆàúÆÜúÄÜúÃÛúÁÛú¾Ùú¼Øú»Øú»Öú¾Ôú¼ÓúºÓú·Òú¹Ðú¹ÑúµÐú´ÎúµÎú´ÌúµÊú·Ëú±Îú®Éú²Èú³Êú±Èú±Êö®Ê÷²Æú°Èö±Æø°Èø­Ç÷¬Æö©Ãõ¬Äó¨Áñ§Áí§Áí¤Áè¢¼ç¡»ä¸áºÝµÙ³Ì°Ç¨Á¤Æ¥Å¡Ä¡Ã ÄÂ®|ª~·´·z¬w§rnfb~U|tYuqMgbDnbKd[?`UD`S?WQD[O?YY?WQD[ODYMBUUDYUDYSFYUDUOIYUD]QD[I?[M?WOFYSDYQFY]FYSI[ODYKDWQFYUF]SF[SM[]Wdq`kwlw~t|k~z§¬£¡£³¬¹²»¢¶¸£º»£»¼¡¸º¡º»£»»¦¸¾¢»¾ ·» º¾¤·¹¢¸º£»»£¸»¹»¥º»¡·ºº»£º¾¤¸¹¡¹º£»»¤·¹¡ºº¤¼¿£»¹ ¹¼¥»½¥µ»¼¼»»¤»¼¡»¾§¹»£¹¾¡¼º¤¸¼£¸·¤º½¢»¿¥¼½¥¸» ¾»¡·»¤¹¸¡·¸¡¹»£·»£¹¸ ·½£µ»¡¹º¢¸Á£»º£¸»¥ºº¤·º©¶»£¸º£¸¾·¸£¼»¤·¼¡»º ½»¢¸»§º¼£º»£¸»£¶º·»¢¸¼¢·»£¶»¡·À¦¸»¤»»§¸º¡·¾£¸»¥»»¤·º¡»»¦¸»¥¹º£º»¥¹º¦»¾¨·»¥¸»¥º¼¤º¼ ¹¹¡¸º¥¸»©»¼¡¹»£³º£¶·£¸» ¹¹¤»¼¤µ¸¦»¼¡¶º¢¹º ¶º¡¶¸£º½ µ¸¢·º¡·¹£¶·£·º¡¸¹£·¾¥¸¶¡º¸ µ¹£·¸ ¶·¸»£³·¢·º¢¶¹¢µµ·¸³¹¢²¶¢¶·¡·¸¡µ··³µ· ³¶¥·¶³· ³¹µ··µ¶·³µ ¶¸¡µµµ³³³³¸³¹µ¶¡¶³²¸¡µ··¶£³¶²·´·´µ³³¡µ·¡²¶ ³¶²´°·³µ ´´ ³·±³³³µ²®²±µ±³³±±³²³±³²³³±³³°¯°´°±®²¬²°±¯±¯´°³²°­³±³±®²²¯³°°²°¯²°®®³¯³¯®¯­³³¬³®±²°ª¯®±²°¬°®®±²¯°­®¬³«¬¬­°®¬®¬¯«¯®°¬°¯ ¢£¢¢ ¡¤£¢£ £¢¤¢¢¥¦¤¢¦ ¤¤¤¤£¥¢¤ ¢¤ £¢£¡ ¥¨¡¤ §¤ £¥¤¤©£©¥§¢¢¡¨¤¥¤§¢ª¢§¡¤¡©¥¨£¦ª¡§¥¨¡¨©¥¦ © ¬¨¥¡©¥«©¬¤¨¢§¤¨¥ª¢¬§¦¦¨¤©£ª£©¦©¤«¦¦¬¤¨©©¢¬§¬¦ª§¬§­¦ª¥¯§­§­§¬§­§¬¨®¦¬¨¬¦ª§®§³¤¬ª­¨¬§¬¥±¥¬ª¬¦­ª¯©¯¥¯«°©¬«®§¯ª­ª¬«°¬®«°©®¬°¬¯¨±­®¬®§°¬±ªª«¯§¯­®¬²­¯¨¯§­ª¯¯±¯¯¨²¬¯¬®§°¬±¬³­³¬±¬°®³°°®­¬°®®¬¯¦³®­®³­³­®§¬u¤{k||{to[WMwOFdMIdDB`MK]QW_WSd[W][SdSKgUI]SU[MDbKI_ODUFF_DBUKOWOM_MK_SM`SM`UM`WQfWQbSQf_Qd]MfUMfSOf[[dg[nxku~¬³Ä Í¨Ò¬×¡±Þ¨·çª·ë¬¾ë¨¼è¬¾ì©½ê¬ÁîªÁï§Áð¬Âó®Çô®Âõ³Æú·Èú¸ÎúºÒú»Ðú½Ñú¸Ñú¹Öú¸Ñú´×ú¶Òú¹ÕúºÔú¿Øú¾ØúÁØúÁØúÅÜúÃÚúÇÜúÃÛúÆßúÆÜúÆáúÆÝúÁÞúÈÞúÅàúÈÞúÈáúÅßúÃßúÃãúÈÝúÈáúÊàúÊâúÊâúÎäúÐçúÔåúÓåúÕçúÑéúÕçúÓçúÙéúØêúÖëúØìúÕëúÖîúÕêúÛìúÙíúÖëúÖìú×ìúÑéúÔèúÐëúÓëúØëúÐèúÕéúÔêú×íúÓéúÛèúÒéúÑéúÐèúÏæúÒçúÊçúÉàúÆäúÆàúÄÝúÀßúÂÚúÂÛú¿Úú¾Õú¾Õú¼Õú¸Óú¸Óú¹ÓúºÓú¹Òú¶Óú¸Ïú¹Òú»Ðú¹Ïú·Ïú¹ÎúµÎú¶ÏúµÌú³Ìú¶Ìú³Ëú¸Ì÷¶Ìø±Ìö²Ê÷°Êö³Èó®Êò¬Çð­Ãï¬ÇíªÃê¦¿ê¥¾ã¢¼ß¡»Þ¹×²Ó¬Ê­Á¬Å§Æ¨Á¥Ä¦Å¤·~¡£´³¶¯¬~¥|rl`{]~k`wkUtdSn_KnYIiSOiMFbOQf[KfOIdWMdSMbYQ_UMfUO`WMkSQfSMfWO`QFbUM`SIdQMbQMd_Mb[OgSKfQO`SQ`OSgYQdYWdYYnoftrr{wr¤«£«¨³¡³·¥¸¾§º¾¨¾»§»¿§¾¾©½¼«À¾«¼¿¨À»©¿¿¨½¿¬½»¦¿¾¦½¼©¾»¦À¼©½¾¦½¾£¾»ªÀÀ¦¾»¡½»¨¿À«½»¦ÃÁ¬¼¾¦¾»§¾¾¥À½¨¾»©Á¾¨¾À¦½»¨Á¿ªÁÁ©¾»¤¿½§¿¾ª¿¼¬¾¿ª¾À©»¼©À½©¼»¨ÀÀ­½¾¤¿¼¦¿¼©»½¢Á¾§À¼©¾¼¥Á¹¦¿»¨¿½«¾¾¨»¾¤¿¿¨¿º¨¾¾ª¼½¤½º¨¿»¨¼¾©¿¼¦¿À¨¼»¬¿¾¤Àº©½½¨¼¼¦Á»¦¿¼¨½½¥¾º©¾¾ª¿»¬Â½§¾¾¬Á¼©¾»©¾»¨¾¾¨¾¾§¿»¨½»ªÁ¿©¾¾ª¾À¨À»§¿¼¬½»©¼½¥¼¾ªº¿¨Á»¬¿¿¨¼¿«¾¼ª¿½§½¸¨½¾©»½¬¹»¤¼½¥½¾¥½À§Á¼§»»¦¾»§»½§¼¸§½¹¤ºº§¹»¤¾º§ºº©»¹¨¼¼¨¼»¤»¹£¹»§¼½¨¼·«½º¥»º¨º¸¤»·¢¸»¥¹·§¹¹¡¹ºª»¸¦º¼¦»º¦¸·¤º¸¥¹µ¥·¹¦»º¤»¶¦¼»¦¹¸¤¼¹¢¹¶§¸¼¤»¹¥¹·¥¹¹¤»»§»¼¤º·¦º·¡··§º¸¨¹¸¢º¸¦··¥¶·¤»¹¤¹´¨¸¹¢º·¡¹¹¦º³§·µ¥»º¤º·¢ºµ º¶§¶· ¸¶ ¸´¡·¶£·µ¹¶£µ·¢¸¶ ·³¡¶µ¢¶¯³³¢¶³£¶³¶³¢´³¢¶±¶³´³³³ ¶´¢µ³´²¡¶³¶µ¶´·¯³± ¶°³³ ³³µ³·³³±£³°´±¢´³ ®³²²´± µ®³²¢³³³³¡³¯ µ­¢µ°µ±¡²®²±¡±²²³´²¡±²´     ¡¡ ¡¢ ¡ ¢¢  ¡¡¢¡ £¡£¢ £¥£¢ £ £¡£¡¥ ¢£¤¢¡¢£¤¢££ ¤¤¡¡¤¢£¢ £¥¡¦ ¡¥§¤¢¢¡¢¥¡¤££¨¤¤ª §¥¡¤¤¦¦¦¨¥¥¤¥§¥¥¨¢§©¥£§¦§§¥§§©«§¥©¨©«§¦§¨¥¨¡¤©§¦©£¨¨ª¦«¦§§¬©©§«¥¨ª©§­«©§¬©§ªª©©§©§©©©¬«««§¦¨«¬ª¬«©§«ª¬¬«­¬¬¨©¬®¬©ª«««¬«¯¬¨¯®­®«©ª«ª©­©©¬««©¬ª¨¨w¢kgwzq`fMzSDgI=_M?OI?UK?SQIWUDQYD]YD[O?]MBQI=UD=OK:O?=SD=MF5KF:OM?OO?SQFQOIUSBYSDYUDQ]D_WDYWD]WD[OB]]K`kWf~go{z§µÃÌ¥Ó«×¬ß±ä¢³ä¸ç¦¸é¥¹é£»ì¥¼ë¨¼ê©¼î§½ð§¾ò¨Ãö¯Àù±Æú²Êú³Êú¹Êú³Îú²Ìú³Ðú±Ìú±Îú³Ðú·Ïú»Ñú¼Ðú»Ôú¼Óú½Õú½Óú¾ÕúÁÙúÃÕú½ØúÀ×úÀØúÀÛúÁ×úÂÖúÁÙúÃÛúÁÛúÃÙúÁÝú¼Ùú½Ôú¿×úÅÚúÊÜúÇÛúËÜúÌÝúÎáúÏáúÐâúÍáúÎàúÒßúÖâúÖáúÓåúÕæúÒãúÓçúÐéúÓçúÕäúÕêúÓèúÑçúÏæúÍæúÒäúÎäúÎãúÏãúÒåúÑâúÎãúÕâúÐãúÏáúÌâúÌâúÌßúÊãúÇáúÇÝúÃÝúÁÝúÃÚúÀÙú¾×ú¼Óú»Öú»ÓúµÐú´Ñú³ÎúµÏú·Ìú³Ðú±Ìú³Îú¶Ìú±ÈúµÊù¶Êú²Ëú³Çú³Êú²Êú³Çù­Èö°Èö³Ëõ¯Å÷¬Æö°Äö®Æö®Çó¨Äñ®Áò§Äï¥Àì¦¾é£»ç¾ã£·ã·à·Ý´ÕµÕ­Î§Æ¦È¦¿ À¾¡¾¹|«w¬|³µ|¬z«|£{gbYzxUwlOqfKodDd_IgUDdQD]UD_Q=]UI]WFYUFUK?YOFYYFWMFYSB]SI]MBUOD[S?WQB_QDUQDSSI]YI[UI[SBUKBYMFSQIWQ?WUIYYO_g[brgo~lwg|u §§£°¬·³¹ ·¹¤·¼ º¾¢º¾§¸»»º¤»»¡¸»¡¹¸ ºº£º¾¡º»¸»£¹º¤¹¼ º¹¡·¼£º»»¿¥·º¤º»£¸¹¹»¥ºº ºº·¹£º»£»¹·»¢¸¹º»¦»»§»¼¤»»¦»¾£¼¼ »¼¥º¼§·»£¸¾¤»»¤º½¤»»¥½º¤»¼¢º¹¡»»¤¸»¦ºº£·¹¥¹»¡¶·¤»º¢º½¤¸»£»¼¤¹»¢¹¹½»£º»£¸¼¡»»¤»¾¥¼¼¥º¼¸¸£¶½¥¸¸£¹¸£º»¸·¢¸¹ ·»¢¸º¡º»£¼¼¡»¹¢»¼¢¹½ ¸¾¤»½¢»¼§º»¤»º£¶»£¶º¤·¼ »º£¹»¤³½£¸»¡·¹¡µ·¦º½ºº¦·»¸»¦·¹¢»»¡»»¦·»£¹º¥º¸¡¶¼¦·¸¢¹¼ º»¥·¸ ¹¸¢·º¤¸º£µ¸¶·¢¶¸¤··¢¸¶£µº¡¶·¶º¡µº¡µ·³»¢µ·¡µµµ¸£»·´¸·¹µ¸µ·³¶³¹ µµ¡´··¸¡µ¶·¶ ³·±· ´´ ¶·¡²³ µ¸ µµ³·³³³·²··¸·µ£³¸²³¶¶ ´·¶µ¶·¶²¡²³µ´ ´µ³µ´®±µ±¶³´µ³³·£²³²´°µ³³´· ±³²³°´²³±³°¯°´²²°³±³³±±²®³¬±°²°³®®°±¯±°²±®±²­¬°®³±«³°°±³²­­°¬¯®®¬®°¬¬²°­¬®­°³±±®®®¬¬¬®­¬¬±­¯®®®®¬¬®­«®«¡¡ £¤¥¢¡£ ££¡¤¥ ¢§¡¢¤¦ ¦¥¢£ ª¦¥¤¥¥¨¤¥¥ª¢ ¤¦§§¬§¨£§¢¦¦ ¤¤§¨¡©¤¨¢©§©©¦£¨¢ª¡¦¡©£¨¤«¨£«¢«¡©¦¬¬¥¨¤©£­¥©¥¨£¬¢­¥«¥¬¡¬¥ª¢¬ ¬¥©¥¬¦­¤¯¦­¤ª¦¬§¯¨®¡­©¬¤®£­©¬©¬¤¬¦­§¯¤¯¬¬¥¯¦­¨¬¦°¦°§®¨­§³ª­§¯§²¨¯¦°¨¯¨¬¨­¦±¦­«¯¬³¬°¨²§³ª³©®«®¨³©³¬³§±«°ª¯§°¬°ª³©³ª³¨°«³ª³¬³©´«³©³ª¯­³¬¶­³ª²®±ª±¬²¬±¬µ­³©±«°®³¨±©²®µ­´«±¥®|£otu{`_O|OKnIDkQI_KK]KF`MQ`QOdSOfUQfQDbKDbFF]ID`KB[BI`FKYB?[BKWKM`MI`SQbUK]SDiQMfSUbWMiYUdSIgYQiSMlb[ir]tt{~§¼Æ¡Î«Ø³Ü¢µß¦µé©¾ê«½é¬Áé¨ÁìªÃí¬Àî¬Ãï¬Æð²Åõ°È÷¯Èø³Èú¶Íú·Ìú·Òú»ÒúºÓúºÔúºÕú·Òú·Ôú·Õú¼Öú¾Öú¼Øú¿ÙúÀ×úÃÜúÁßúÅÝúÃÞúÄÞúÅÙúÅßúÇÜúÃÞúÅÜúÆßúÆÞúÆÜúÆßúÃàúÃàú¿ÜúÁÝúÇâúÈàúÊáúÊæúÌäúÏãúÒãúÒåúÍåúÐäúÍçúÐåúÒèúÓæúÕæúÒæú×èú×èúÖëúÕèú×êúÛèúÖèúÔëúÕìúÒìúÑêúÒëúÒèúÒèúÒèúÎçúÕëúÒçúÒçúÒåúÎèúÍèúÎãúÎçúÎçúÌàúÆáúÈæúÆßúÁàúÃÜúÀÝú¾Ûú»Ûú»×ú»Óú¸Õú»Òú·ÕúµÒú¸Òú´Îú·Ñú¶Ðú·Îú·Îú¸Ïú¹Îú¶Ìù·Ïú¶Ïú³Ìú³Ï÷µËù´Êö³Îø³Êø°Èö³Èö±Ìô³Èñ¯Èï­Äï¨Åì¦Ãé§Àæ¦¿ç¤»â¢½â¥ºÝ¸ÙµÙ³Î±È«Ê¨¾§¿¨Á¥Ã¢¸£¢~³¶­®ª|£zndxdw]ziSwfQu_QqWOnQKlUMgQId[ObWQiSIfIMiOQb[M`MKiSMbUQfMDgMQbOOgSKkQOdOOgUMiYSlSQlQIdQKfOM`UMfQOg[UkSYo`kowfzro|{n~u§¥¥©¶£´·¤¸¹¦»¾¤¼¿¦Á¾¥Á»¨¿½¨Á¾ª¿»¦¾»¨¿¼§¿½ªÁ¸¨Á»ª¼»¨¿½¨Â»¨¾¼ª½»¥¿»¦¿¿«¿»¬¿¿£À»«½¾ªÀ½£Âº¨À½«Á¸¨¿¹¥¼¾ªÁ½¥Á»©¿¾ªÁ½¨¿¾¥Ã½¨¾»¤¼»ª¿À©¿¼§À¾§Á½¨Á¾§¿»¦Á¼©¿¼§Á»¦¾»¦¿¼¦¾¼¨¾»ªÀ»§¾½§Á¼©¼¾©¿¼§Ãº¨¿¼¨¾¼©Â¾§¾»¨¾»¥¿»§Á¼«¾¼¨Ã»¨Á¼§Á½ªÁ»§¿¾©À¾¦¿»¤Á»¨½¾¨¾¿§Á¶©½¾©½¾¤Á½§¿»ªÁ»§¿¿©¾¾¨Ã»¥Á¾§¿À«À¾¨Á»¢¾¾¬¿À«Á½«¿¼§¾»¤¿»¨ÁÀ¥¿»¬Á¹¦½»¥¾½ª¾¼¤¾¼¨½¼¨¿»§¿¼¦¾º«½½¦Á¹¨½¾ªº¹¥À½¨½»¬¼»¦¼¸¨¾¹¥½º¨¾º¥¾¸¤º½¥¼·¨½·¨»ºª¼º¦»»¦»¹§¼·¤¾¼¨»·¨»¸¥»·¥»ºª¿¹£º· ¾»§½·¦»¹¡»º¥»´¥»»¥º¹¨¸¶¦º¹¡¶µ§¼·¥º·¨»¹¦··¤»·¤»·¨ºµ£¼·¦¼´§¹¹¤º³¥½¹¤º¹¥··¥»·£¹·¥º¸¦»¶¤¸¹£º·¢»´¥º¶¢¸³¥¹µ¥¼¶¢¹·¤¸µ£»·¡·³ ¹¶£¹°¹³¤¹´·² ·³¡¹³¡·²·´£µ³¶´¡·²¡·®·¯·²¹³¡¸­µ²µµµ³¸³³¯ µ¯ µ³·³¸°´²µ²¡¶°ºµµ²¡·³¶°³³¡µ±¸¯ ³±³­³²³³¡´±¶©¶³´°µ®´²³±¶®³²³°³¯ ³­³°³¡¡  ¡¡¡¤ ¢ ¤ £¡  ¡£ £¡¢£¡ ¢ ¡ £ ¡¡¥¢¡¡¥¤ ¦¢¢  ¥£¢§¦¤£¥¦¢¤¤¥£££¤£¦¡§ £¦¨£§¤§¦£§£¡¦£¢§¥¢ª§¥£©¥¨§£§¤£¥¡§¨§¤©¥¨¥§§«©¦¤¦¥§£§¦§©ª¥©ª¬¥©¥©§¥©§©ª¦ª§§©«§«©©¨©©©¨«©¬¨«§©¦««©¬ª©¬¨««¬ª¬¨ª©®««§«««ª«ª¬®ª©««©¬¬«®­ª«¬¬©©¬©«¨¬§¬§¬ª©©®«¨«§ |£ontztfkQ|UDlOB]I:]I=SKBOO?UOFU[DW]DYQDYO?QI=UF?UM=IF8Q?5MK=IF?QD:MI=QQDSSBUODYQ?UM=YMDUQMYW?]QBU[IYSI_`Sb|_kktzªÁÉ¢Ï¨Ú®à±ã¥±ç¥¸è¢¸ç¢ºè¥»é¦ºè¥ºì§¼í¦¾ï«Àó«Àö¨Äö±Äø³Èú°ÅúµÌú·Ëú´Îú³Ðú±Îú³Îú³Ïú¸Íú¹Òú¹Ñú¸Óú¹Ôú»Øú»Öú¼Õú¾Øú½Øú¾Ùú¼×ú¾ØúÀÔúÀÙúÁÛúÀÙúÁÚú¾Øú¾Õú¾Øú¾Ùú½ØúÁÛú¾ÙúÃØúÈÜúÇÝúÇÚúÎáúÊâúÈÝúÆßúÆàúÊÛúÌàúËÞúÈàúÏßúÐàúÍäúÏâúÎâúÌâúÎãúÑãúÏåúÎãúÑæúÌæúÎæúÊáúÊáúÏâúÌáúÌáúËßúËàúÊáúËàúËâúËáúÆßúÊßúÄàúÄÜúÄÚúÃÝúÀØúÁÖú¼Óú¸ÕúºÒú¸Ñú·Òú¸Ðú¶Îú³Îú²Ìú²Ìù«Ëú±Èù²È÷³Êø³Äù²Èø²Êù±Çú±Èú²Êú³Çù³Çö³Èø³È÷²Èõ°Ìö®Æö­Æö¬Æò«Ãô«ÄîªÀî¤¿í¡Áè¾ä¢¼æ¹âµâ¢µßµß²Ú´Ø¬Ó«Î¬Æ£½¤Æ¢¾Ä¡½|§u±|¶~³~³¬z¥riYzUzuSxoMn`Il`Kg`?dMB`SD[MBYWI]UFWOD]QD[UDUQDYSD_MDWQB_MDUO=UMDSOB[Q?WUIWSF[QD_WI[YF]M?[UFWUDYOFUWKYWK]`[`{`qn`rqgxuo©¡¦³®¶¡³· ·¼¢¸¹¥·¼¢»¼¹» ¸º¡»»¤»¹£·¸¢¹½ ·»¢¸»¡¹¸£¸»¤º»º»¸½¥¹¼ ¼¼¤»¼¢¹º£»»º¾¦º¹¥¸»¸¼£·»¤¹º¢»¼£¸º£»¾¤¸»¢¹º£¸½¢º¹¥·»£¸»¡¸¼¢»¼¡¸½¤»¼£¹»¦¹¿£»¸¢½½¢·¼£¹»£»¾£»»£»»¹¼§º»¢º»»º¡º½¢¸¼¢º¸¡·» ¸»£»¼§º¼¢¸¾¢¹½¥·¼¢·»¢»¹£·»¤»»¢»º¤¹¼¢º¸·»¦»¼¤·º£º¸¦º½£º»£»¼º»¦º¼¢¸¹¹¼£º»¡»» ·»¨»¹¡·»£¸»¢º½¦¸½£»»¥¸¹£·¹¡¹º£¹¼¤¹º¥¸»¢·»¤·»¡¸¹£º¾»¹¥¶·¢³¹¸»£»¸ ¸»¡¸¹¤·µ£··£µ¹¡µ·¢¸··¸¶º¢·µ ·º¢¸³·º·¹¡µ·¡µ·µ·£·¹µ·£¶»¢µ¹ »¶·¸µ·µ·µ¶ ³·£µ· ³¸··¡²·µµµ¶³µ³¶·¸´·¡³µµ¸¢³· ··µ·¢µ»´³³¶¡·· ³²²·²³£³³³µ ²µ²µ³¶²µ ´²³´ ´³²µ±³³´·¶µµ²¶±³³³³µ°³²´µ² °³®²°µ±³®³¶¯®¯®°°²°±²±¬±²±°¬²°¯°¯±°¯¯°®²±®®²®±¯°°¯°±®¯°­¯°¯¯­°±®­­°²¬²°¯®¬¬­®®­¬¬°«¬­¬­¬««¬®ª²¬ ¡¢¢£¡¤¤£¢¦¢¦¨§¤¤§ ¡ ¥¦¦¤¢¤¦§¥ £§¡¤ ¥¦¨§¢¨¤£¤¦¨¦§¨§©¨£¨ ¦ª¢¤¤«¢§§¨«©¢©¬£©¤¨¢«¥¨¡§¥© ¬¤ª¤¨ ¨¢ª¤¬£­¦ª¡«£©£¬¤ª£¬¥¬¦¬¤¬¡©¥¬¤©¢­¥©£¬¤¯¦¬¤­¦¯¤«§¬¢¯¨¨¥¬£¯¤¬©¬§­¥«¦¬¦®¥­¥¯¥°¨°§­©®¤®ª¬©°¨­©¬©±ª²ª¬§¯§°¨­¨®©±¨¬¬®¨¯©°¬®ª³ª¯©²ª±©±¨®«®¬®ª°ª²«²¬³«³ª®¬³¬³¬²¬²¬®¬´¬³®¯¬³®³¬´¬²¬´­³¬´¬³«°¬²©³­±ª²¬²¨­§u~{uzf_SWFnIKkFFbKI]FM]KKbQU[UObOMfOQfSK_KI`DDbIKUDI]=F[MFUDKbBBYOK`OQ`KI`MO`WI_MDkOQbQOiOIgQO`[QdUWkf_qnxt®Ã¤Ê©Õ¡®Ø¤µâ§¹é­»ê©¾í«Àê¨Áë®ÂìªÃî§Áñ­Äñ­Åô°Æö²Åø¬Éø°Ëú³Ëú·ÐúºÏú¸Ðú¼ÒúºÖú·Óú¸Öú¹Óú½Õú¿×ú»Øú¾×úÀÙú¾ÜúÁÛúÃÛúÁßúÃÙúÁÞúÁÛúÅÜúÀÛúÅßúÃßúÆÞúÃàúÁßúÅßúÂÞúÄàúÄáúÇáúÆßúÈàúÊáúÈäúÌäúÉæúÉæúÌâúÍàúÊáúÏãúÍãúÍäúÌáúÎäúÒãúÏäúÐâúÑçúÐçúÐèúÐäúÒçúÓëúÑìúÒéúÔèúÎéúÏéúÒäúÐäúÐêúÏèúËçúÍåúÎãúÎãúÊæúÊãúÌäúÉâúÈàúÈàúÆáúÁßúÀÝúÀÜú¼Üú½Üú¹Øú¹Øú»Õú½Õú³Õú¶ÒúµÐú²Ñú³ÌúµÍú·ÌúµÎù·Ð÷·Îú·Ðú·Îø³Ðú·Ëù¸Ìú·Ðù¶Îú´Îø·Ëù·Íö³Ìô²Çõ±Êó¯Èó­Æð¬Çï¬Åë§Âé¨Áè¦Àá¥¿ã¥¼â¢ºß¤»Þ·Û·ÚµÑµÌ²Á«Ã©Ã¨É¨À¤¶¤°³¶¸µ¬ tg`r]t]|lSx`Wo`QnUKkSMbMMgUQfQI_SOkYMgSMfQMbQMiOI`UOfQMbMKgUQ`OKbQMfSSfUQiQUgYQiWOiOOgSSfOQgQQfUQg[MkWUkndzogxkfxr©¢ ª·¤²º¡¸·¤·¾¨¼¹¨Á¼ª¿½§¿¼¬À¹¦Á½§Â¼¥½»¥Á½¬À»§¿»£Á¿ª¼¿©Â»¤¼»¡Á»§¿»¨Á¾©Á½¨Á»¦Á¾¨¿¼¨Á¾§¿¾§Á¼©Ã¼¦¿¸¨¿À¨¾¾¨Ã»¨Ã½¨¿¾¨À¾§¿¼©¾½ªÀ»¨Á¾¨¾»¤Á»ª¼¿©Á½¥¾½¨¿¼¦Á¾©½¼¨À¾¨¾¿©»»¥Á¾¨Â½¨¿½ª¾»ª¿¼§¿¼ª¼º¦Á»¥À»¦¾¼¦À¼¨¾½¦¾»¦¿¼§¿¼¦¼¾ªÃ»ª¾¾¬À¾§¿¼«Ã½¬½½¥¾º©½»§¾º­Á¾¨Àº¨»»¬À½¨Á»ª¿¼¬¿º¨¾¾¬À¼ª¾½¨¾¾¬¾½§À½¨¿¼¦½Á¨»»§¾¼¦¾¼©À¸¬Á¿¢½½ªÁº§»»¨¾¾¨À¼©½»§Á¾ªÁ»ª½»¨»º©¾¼©À¹¦¾¼¥»¹¤¼¶§¾»©½¹§»¹¥À·¤¼º¥»¹¢¾»¥»»§¿º¨¾º¥¼·¥¾¶¢¼½¥»¶¨»¸§»¸¨¼¿¦º·¦¾·§¼¹¨¾¹¨¼¹£¿¹¦»µ¨¸·¡»¹¢¼³¤¼·¥»»¦½µ¦¼¸¡¼·¦»·¥¹µ¢¹´£¹»£»»¥½µ¥¹·¥»³¤»µ£¹·¥·´¦½¶¦º¸¦»µ¥ºµ ·¶¢·¶£»¶ º·£º¶¢¹µ¢¸µ¡¶´¡»· »´¤·· ¸· ¸³§¹·£¸³£½³¢º´¤ºµ ¹³£¹´§¸·¹±¡·µ¢¶´·´¢¹·£»²¢¶°¡¹³¡µ³ ¸­¸²¡µµ µ° ¹²¶²µ¯¡´¯ ·²¶±´±¡µ²µ¯¶¯³± ´²£¶®³­·³ ³° ´¯´®³®¶³¶¯´¬ ·­´°³®²­±´´­¶¬³®±±µ±³¯²¡¡  ¢ ¢¥£   £¡ ¡¤¢£¤¡ £¡¢ ¤¡£ ¤¢¤¡¢¢§£¥¡¡£¢¡¡¦¡¢¢£¥¡¥¥¦¡¦¢££££¥£§£§¤££§¤£¦¥¦¤¢©§£¥¥ £¥¦£¥¤££¤¥©¦©¥¨¦¨¥§¦¥¦¨£¨¥§¥§§§¥§§¤¤§©§§¦§©©§§©£¬¨¬©ª¨§¦ª©¦§¬¨¬§©ª§ª«©«¨ª§­§¬§¬©«¥««§¨°¥¨©©«¬©¬¬¨«¨©¬®©¬­«ªªª«­©¬©«®­©®«ªªª¨®ª§§©ª«¬­®¬§¨¨¡rwow`kUz]FrM5bM8Y?=QF:SI?QQBUOBWQFQO?YI?SK=UK=UF8OD8QB=OD5MD?MB:MB:QKBQS?WM?QO?UQDWM?WQ?[QB[U?WSDYYKY`Q`oYkftr|§°ÅË£ÓªÛ£®ã£²ç¨·é§»è¤»æ¦¸é¥¾ì¢¾ë§»ï©¾ó¬¿ò«Ãó¬Á÷¬Æø±Æú³Æú°Éú´ÌúµÌú³Èú·Íú¸Ïú¹Îú²Ïú¸Óú¸ÐúºÓú·Ñú»ÓúºÕúºÕú½Õú½Øú½Öú¼Öú»Øú»×úÀ×úÂØú¾Ùú¾Ùú½×ú½ÛúÀÙúÁÖúÀÛúÃØú¾ÙúÁÙúÅÝúÈßúÈÜúÃÝúÆßúÆÜúÁÜúÈÜúÈàúÈßúÆÝúÅÜúÈÙúÆÜúÈÛúÈÜúÊÛúÍàúÊàúÉÞúÊàúËàúÌâúÎàúÊâúÎàúÍáúÊàúÌâúÏàúÌâúÊãúÊßúÊÝúÈßúÇÝúÆÝúÆÜúÉØúÄÛúÃÝúÀÚúÀÛúÁÙú¾ÖúºØú»×ú¸Óú¹ÑúµÔú´ÎúµÐú³Òú±Ìú²Íú®Ëù²Êú®Èö¯Æø±Êù²Èø±Ç÷®Éú±Æø²Æø°Èø°Êö³Æù²Ìö³Ãõ±Çô°Çõ¬Æô¬ÆôªÄñ¦Âñ¬Áî©Áí¤¿é¤½è¦»ç¹áºß¶ÝµÛ³Þ¡´Û²Ù±Ô®Ð«Ä§¼¢Ä£Æ Ä»|¬z²~®»¸°{kd[|SzqUoiOnbFg_MbW?gSD_UFWS?_MB_WIYSDYOB]QFYSI]QDYSDYFF[Q?SQBYKDUM?[OFYSF[QI]SD[UDYOD]KDYSDUQIYKD[]F`QDY]Ufn[lkUqng|¤¤£±ª» °·µ·£·¼¡¹¼£»»£¸»£·¸¡»»£»»§º¸ ¸»¢º½¢»½·»º»¢¸¹£¸º¡¼¼£º¼¡»¼¢·¾¡¹¾¡º¸¡º¾¢»º¢¹¸¢ºº¡¹¼ »º¢º¸£¼»£·¼£»¼¡¸¹¤º¼£º»»»ºº£¹»£»¼£¸¿¤ºº ¸¾£¹¾£»º¡¾¼¢¼¼£¹»£»»£¹¹¢¸¹¥¼»£¸¹£¹¾£»¼¡¸¾¥»»¢»º¡¸¼¢³¼¦·»¤»»¢º¾§»»¢»º¡º½¦·½¡¹½¥»»£¸¹¥½¼©½»£¹¹¡¹º¤»»¤¹º¹¾£¸¸¤»¸¡¶¹¡½½¥º»§»¼º½¦·»¢¹º¢¹½¤·»£¸·¤¸¼¤·»¤»¸¡·»¡·»£·¹£·»£»»£¸¸¢»¾£¹½¥»½¸¸¤¸»¢»º¥¹¼º»¢´» ºº¡·º¡·¹¢··¡·¸²º¢¹¶¢¸· ³¸¢¸¹º¹¢¶»¸´£¸º·¹·³¶»£¹·¡·º ·¸ ·º¢·µ¹½¢´· ³º¹º£¹¶ ´¹³¸¡·¸´¸³´¸¸³¹µµ·µ£··¡µ¶¡·· ··²¸ µ·³· µ·¡µ´´¸¡³´³¶³¸ ³· µµ²³³µ³¶±¶²µ³²´³²³µ³²³³³³±³±¯³ ±²·²±µ²³³³´³³²³´°µ¯³³²±±°±²¯°³ ­²±®²³¯³°¯²®°°®¯¯±¬²­®¯²¯±°¯¯¬®¬°°±°¯¯®±²°±²¬°²¬®²°®¯¬®¬°°°±®­­¯®ª­®¬­«°­¬©¢  ¡¡£¡¡¤££¥¢¢¤¡¤¤¢£¤¤£¥¤¤¤¤¢¥¡£¦£¡§¡¡¤§¤§¥§¢¥¢¦ª¨§¦¨¡¥ ¤ª¤¤ ¥¡© §¡§ª¤¦¡¦ §¡§¢¨£©¤¨¡¦¥¨¡¥¢«¤ª¡©§¨£ª£­¢¨¬¢¦¢«¦¬¢¬¤ª¦¬£¬§«¤¬¦ª¨©¤¬§¬§®§¬¤©¥¬¦¬¤¬¦¬¨ª¤¬¤¬§«¨¬¥¬¨¬©­ª¬©¬©¬¦±©¬¨®¨¯©®ª¯¨¬¬­¬®§¬©¬¦¬ª²¨°©«ª±ª­¨­«­«±¬¬¨®©®ª±«±«®©®«®¨³©±¬®ª³©¯¬¯¨³¬²¬°¨²­¶¬³«¯¬³®¯®³¬±«°¬³¯³¯°¯³­²±²°±¨³ª°­³­°­¯®²¤¬«|{tw]d[UKuOBfIKdFF]FD_SF]QObMM`OI[OMbOI_MD`OK[BDYID]DFUDFYDFWIBYFK`?I[QB_MK_QF`YQ`SKiOK`QIbUBbSQ`[Qkl`ltiuu¢|®»É¥Î®Õ±Û¤²äª¸è¬¹ë¬Àéª½èªÂï¬¾í¬Ãï¬Ãò¬Âó®Æõ¯Çø³È÷°Êú³ÍúµÌú·Îú·Ñú¶Ðú»Òú¹ÒúºÕú¹Óú»Ôú»Öú»Øú½Ûú½ÚúÁÚú½Øú¿ÙúÃÚúÁÜúÁÜúÃÝúÂÞúÀÜúÆÚúÄÜúÅÝúÃÞúÂÛúÃÝúÂßúÄßúÂàúÆßúÃäúÇàúÈÝúÉáúÈãúÈãúËâúÈâúÅáúËàúËßúÊáúÉâúÈÞúÉàúÉÝúÈàúÌàúÍâúÊáúÍåúÌâúÍæúÊäúÎäúÐèúÐçúÎçúÎäúÎçúÎæúÒàúÕèúÏçúÎäúÊåúËæúËâúÊãúÈßúÆâúÆáúÇÝúÆßúÁÜúÅÞúÁÝú½Üú¿Úú½Øú½×ú»×ú»Öú¸ÖúºÔú³Òú¶Òú¸Ðú¶Ìú³ÏúµÏú¶Ðù·Ìø³Î÷³Ìù´Ì÷µÍú³Ìú¶Ìú¶Ìú´Ðö·Êø³Ì÷¯Êõ±Êô¯Èô¬Åò­Äò¯Ãí©Åï¬Âî©Äé¦Áè¥¿è¢¾è¡»á¢»ã¡·à£¸Ü¡¶Û·Ö´Ö±Ì¬Æ¬À¦Æ¥Æ¨Â§·¤­² »»±~¥wribw]~oU{bStbSr`MnOMiWMbQKk[OiWMbOQ_OKiOSb[OdOMdQK_MO`MI_UI`OMbODiQKdSOdSOiWKfWQkUSdQIfSQ`QQdQKf`QgUMf[Wkg`odYukk|¤¥©°¡®»¦·»¢¸»¤»¼¨¼¾ªÀ¾¨½À¬¿½¤¾¾¨À¼¦¿¾¢Âº©¾»§¾¿ª¿¼¨¿¼§¿»¨¾»¤¿¼¨¾¼¬Á»¨À¿¨¿À§¿»§ÁÀ¬¾¾¥»»¨À¾¨Â»¤¼À£»¿©À½©¾¼¤¿½¥½»¨½½¨Áº©¿»¦Á½¨¿ºª¾¾ª¼»¨¿»¨¿¾©½¿§Ã¾©Â¾¬Â¼¥¾»¥À½©»½§Á»¥Â¼¨¾¾¦ÀÁ«¿»¨¾À§¿»¨À¾©¾½¨»¾§½¼¦¾¾©À¼©Â»¨¾¾«¾½©À¼¦Á½¨¿¾©Á»§ÁÁ«À»§¿¼¥Á¾ªº½«¾»¦À¼¦¾¾ª¾½¥Á¼©¾»¨»¾¨¿»§¿»¨¼»©¿»¥¾¾¦¾»§»»§¿¼¨¹»£¼½¨¼¼¥¾¹©Á¼§À»¨¿¼¤¾½¦¾½«¾½¦¿¼¥¾¼¬¾¹¦½»©½¼¦À¾§¾º¦¾»¥»»©½·¢½»§¾»¦¼»¦»¹¦»»§»º¨¼¹¨½º¨¹»§½¶§¼»¦»»¡½¸¦»»¦»·©¼¹¦»¹¥º¹¨»·¤»»£Àº¥·¹¡¾¹¥¼º¨¸¹¤½¸¡¾·¥½»¦»¹¥»º§»º¥ºµ¤¾º£»·¦º¹¤¼·£º·£·¹¢º³¥º¸¥¼¹¦¼º¡¸¸£»¶¢»·¢¹·¤¹·£¸»¤¸¹¦º¹¡»´¢º·¦º·£»´£º·¡·¸¢¹µ¡¸µ¤·¶¡¹¶¥¹¶¤¶³£¶³¸´ ¸³·µ¢¶±¡·¹£¹¶¹¶¤µ¶¤º³¹³ ·³£¶³ µ² ·³£·³ ¶´¡¹´ µ±¶®³³¶±´¯µ­µ³¢³±¡µ´¢µ³´²´³¸±³¯³°µ³³³ ³® ´°µ³ ³°¶²±±´¯³°¡·­¡µ°³° ³°µ¬³²¶¯ ³¬³®±¡¡¡  ¡¡  ¡¢ ¢¢¡¢£¡£¡¢¢ ¡¡ ¢¢¤¡ £¡¤¤¥£¦£ ¢¡¡£¦¡££¤¥¦£¤¤¡¤¡¥£¤¤£¥¥£¥£¥£¡¡¥£¤£¥ ©¦¦¤¨¦§¦¦¦©¤¤¨¥§©¥§¤¥¤¦¤¦¦¨§§¤¦©¥¨§¤¦©¦§©£¦¤¨¨¨¤¬§©¥ª¤©§©§©«©©«©©§«¨¬¨¦ª¬§«©¨¨¨««ª¬©ª¬««¥««¨ª¬¨¬¦§«¬©«¬©¬¬§©§¬«¬ª­­ªª­©««­­ª¬®¬¬¬®«ªª«¬¦«­¤«ª«ª«§¢~|zrwflQwQBoU8`I?YB8UKDQI:OK?SMFQY?UI8QM?SKDSK=UI=MI?W?5IF=OD8I?8MD=ID=OK8OIDQM:WM=UQ=QQFSM:WODYU:WUI]]F[k[dxfor{¤|³³ÃÌ£Îª×®à¨²æ§³è¥µå§¹é§»ì§ºî©½ë¥¾ñ¬¾ò¬Áó«Ãõ¬Ã÷²Ãø®Æú±Æú°Èú°Èú±Ìú²Ìú³Îú´Îú¶Ïú¸Ñú·ÑúºÓú¸ÓúºÓú»Ôú¾Õú»Öú¹Øú½Ôú¾Ùú»Ôú½Õú¼ÖúÀÖúÁØú½ÖúÀÙúÀÙú¿Øú¾ØúÀÙúÁÛú¿ÚúÁØúÁÙú¾ÜúÁÛúÁÜúÁÝúÃÛúÃÝúÀßúÄßúÅÜúÅÛúÆÜúÇÝúÁÝúÃÛúÃÙúÄÛúÅÜúÃÚúÃÝúÆÞúÈÛúÊÝúÊÝúÊàúÇáúÊàúËÝúÇàúÌáúËÜúËÝúÊßúÇáúÆßúÈßúÇÞúÆÜúÁÞúÄÙúÁÚúÅÚúÃÛú¿Ûú½Öú¿Ùú¾Ùú¸ÕúµÓú¹Òú·Ñú·Óú·Îú²Òú²Ìú¯Ëú³Éú³Ìù¯Êú°Æö°È÷°Çø±Ìö¬Çö²È÷³Æø¬Èõ®È÷®Çö®Åõ²Æ÷­Ãõ¬Éô¬Æó«ÂðªÅï¦¾í§¾î§¿ï£½é¤½ê£Àç¢»å ºä³à¡µÝ³Ý´Û´Ù¯×­Ö«ÎªÍªÃ£¸ÃÃ¹®|­´¸³­tn`_uYwqOtdDl`If]DfUDdYF]YKYSD]QDYODYQ?[OIUUD[KDYQDYMFSMBYOBUOBWQ?YM?WMDUQI_YI_YI[MD[M?YIFSQKUQ?[OIYUF]UI_dUfgUki`q¢¨¬©»¢±ºµº¸·³¼¡·»¸º¡º»¡¹»¢¸»¡º» »º¸»¤º»¦·»¢¸¼¡»¹ ·º¡»¼¢ºº¥»º§»¾¸º£¸º£º»¡¹¾¡º½¤¹º£¸»¡¼¼¢»½£º¼ ¸¼¥··¸»£¸¹¡¹½¥¹½¢¸½£»¸£¸¹£»¾¡¹º¢»¹§¼¾¦º¾¤·¼¡¼º£»»¦ºº£½»¥»¼ ·¾£»¼¢·º¦»»¤»¾¡»»¢¸½£»½£¹»¦¸¼¢º·§¸»£»¾£¸½¤º¾¤¸¾£¹º£»½¡¹½¥¸¹¤»¿¦·¹ ¸»¡·»£·» ¸»¡·»¤·¼£º»¢º» ¶»£¸»¡º»£»»·¹ ·¸µ»§¹»¡·»¦¹º£¸º¡¹»¤¸»£º»£¸»¡·¾¥·»£¸¹¡¸»¦»»¥¹»¢·¹¤¹º¥¶¸¹»¥¶¸³¹ ·¹ ¸»µ¶¡¶¹¡µ·¢¸¸ ·º¶º¢µº··¡·¶£·¸··¡³··· ¶¸·» µ¸µµ¢·º ³·¡µ·µ··¸²·¢µµ¡·µ ³¹ µ· ²·²¹¡·»·µ£µ·µµ¡¸º ¶¸ ³·²´¡³¸´·³³£³·µ·´·µ·±³µ³ ±¶°³µ¶³·´²³¶¡±³¡·¶´µ´´´µµ¶³µ°µ¯³²³°²³¶²³³²´³²¯±²±³°µ±±³°¬³°±®²®°°²±°¯¯±²°®¯±®±®®¬±¯²«°°°°²­²±°­¯®±±®®¯¬±®®±®²²­²°±°­®­°®±²¬¬®­®­¬²¬®«¯©¬¬©ª¤¢¦¡ ££¡ ¥¡¢£ ¢££ ¥ ¥  ¥¢£¡¥ ¥¤ §¤¥¡¢£¤¡¤¢¤ ¢ ¤ ¥¥¥¤¤©¤§ ¥¤¢¨¢¤ § ©¡§£©¡¦¤ª¡ª¤© ¬¡«¬¤¦¦«¡©¥¨¤« ¤£¦¤¥§¬£©£¨ ª¤«¤ª¥¬¢ª§©¤ª¤©¨¬¦«¡ª§«¤¨¤¬¢©¡«¤¬©©¦ª¦¬¨¬©¬¦©¥¬©¬¤­¦¬¥¬¤­¤®¨¬¦¬§¯¨­§¬¨¬¬°©®§««¯©¯«°¨¬©­¬¬¥¯ª¯¨²¥®¨¯¦¯¬¬ª­¨±ª¯ª¬¬±©°ª®§²«³¬®ª¯©°§®­³¬°¨°ª®ª²«¯¬²¬±®²©²©³¬®¬³«³®°ª±®´«±¬±­³®´±³­³³³­³¨®©²¯¯®±ª³¡¬ §¥|~lnYSKuSKkBObKK_OS[QK]OM_UQ]QO_KKbKK[IK[OKbOI]IK_BF[KFWKKUBK]MM]II]MK]MO[SK]QI]SO_UK_QMdKMbQObbQi]Yirfon|¨¹¸ Â¤ÐªÓ ²Û¦°ã­´ã«¹é¬½ì°Áð«Àï®Ãî®ÁñµÆò°Ãõ³Çö³Æ÷³Çú²Êú±Êú¶Ìú·Îú¹Ìú¹Ðú»Òú¾Òú»Õú¿Õú¿Öú¾ÖúÁØúÃØúÃÝúÇÜúÂÜúÂÙúÃÛúÃÚúÁÜúÃÞúÃÜúÅÝúÃÛúÄÚúÆßúÆÝúÉÝúÄßúÈÞúÈàúÆáúÇáúÊàúÄâúÆàúÊáúÈãúÆãúÌâúÇâúÊäúÊâúÇâúÊäúÈâúÈáúÉàúÉÜúÄàúÈßúÈàúÊàúÉàúÌáúÊâúÌâúÎáúÎâúÌäúÌãúÊãúÐäúÌàúÍãúÏâúÐåúÍãúÍáúÊßúÌãúÉâúÈàúÇâúÆâúÊâúÇßúÈàúÅÝúÃÞúÃÚúÂÝúÂÛú¿Öú¼Ùú»Ùú»×ú¹Óú·Òú¹Òú½Òú·Òú·Ìú¹Îú¹Ðù·Îú¶Ìú´Ìù¶Ì÷¶Éö³ÍøµÍù¶Ê÷µË÷»Ç÷¶É÷µÎô³Êõ²Èò³Æñ¬Åð¬Ãï®Äì¬Ãï®ÀìªÁç¨¿é§Àé¤¼æ§»æ¥¹à¦·ß¡¹Ú¢·×³ÕµÐ³Ð®Í®Ã¨¾§¿¥¹¤·°³µµ³¡ztibu`{kYzfWrkYq[Uo`QkWSiOOiQQ`UQdQSgSUdSOdSOfQKfQSdSObUOdOK]QK`OQbSU`QSg[QgWSiSSgMOdOOdQSbUS`SUf_WiYSk]`nnbuogu¡­§¯°»¦µ¼ª»¼¡»¹¥¹»¦»¼©¿¾¨¾¿¨¾¼¨¿¼¨¾¼«Á¾¨À»¥¼¾¬Á¾¨À»¬À»¦¿½§Á»¬¾Á¨¾¼­Â¿©Á¾©¾¿¦¾¼«½À¨ÀÀ©À½©Á¾¦À¼©¾½¬¾¿¬¾À¨¾½¨À¿¬¿À©½¼©Á¿¬À¿«À¾«Á½©¿¿©¾½ªÀ¿¬½¿ªÃ¼¬Á¿ªÁ¾©¼¼ªÂ½«À¿¬¾¿¨À¾¨Á»¨¿Á¬À¾¬Á¿ªÀ½«Á»ª½¾«Â¾¬Á»¨ÁÀ¬¿¾©À¿¬¿½®¾¿¬¾¾©ÀÀª¿¼¬¾¾«½¿­ÁÀ¬À½¥¾¾¨¿»¬½¾¨¾»§¿½¨»¾ª½»ªÁ¾«½Á­¾¾«Ã»©½¾¬»¼§À¾¨¾¾¬¾¸¨½»«Á½¨À»©¼»ª»¾ª¾¾¨¾¾ª¿»­¾Àª¾º¬¾½¨»»­½À§¾»§¿¾¦¼»¨Á¾¨Á»¨¿¹¨¼¹£¹º¨¼¼©¾»§»»¥»¼©»»¥»¹§¹¹§»½¨¾¹¬¹º¨¾»¦»»¦½»ª¿¶§»¼§»¼§º¹¤»»¥º¸¦»º¦¸º¥¼¹¦¼¶¡º·¦ºº¦»»¥¼µ¦»¹§»º¦¼¾§¾¹©»º¦¼¸©»»¨»¸¥»·¦º¹§½·¦¶·¤¼»§º»¥º¶¦º¸¥¹»§»·£»¶¤¸¸¦¸µ¥»·¨¹¹¥¹³¡¸º«·¹©»¶ ¶¶£¸¸§º·¥»µ£»´¤µ¶¥º·£µ³¢»³¡¶³¶³¥·¶¤·³ ¶µ¡³·¥¸µ¢¸· ´µ¤»´¢´µ£·µ¡´±¥··´¶¡´³µ³¡¸³¢³° ¶³µ´¦·³¢¶³ ³³³¯¢³´¢´´¡³³¢·´·³ ±³¢µ°¡¶²²³£´³µ²µ²¢³± ´«µ­¥²¯´­¯¯³® ¶± ´±²°³¯µ± °°±°³ ¡¡ ¢¡ ¡£¡¢¢ £¡¡ ¡ ¢¡£££ £¤¡ ¡£¢¡¢¤£¢§££¦¡¡¢¤¡£££¤¥¢¤ ££££¥¥¡£§¦£¢¤¢¨¢¡£¦¥¥¤¥¦¨§¦£££§ §¦¥¤£¦©§¤£§¥§ª¨§§¦©§¨¨¥§©§¥¤¦§©¢¤¨ª¥©©¨©©ª©©©«¤¨©©¬§©§¨ª«©¬©©©«§«©¦¨¬©§¨¨¨©¨¬¨§§««««¨©ª«¬¨©¥ª¨««§«¬©«­¬ª¬ª«­¬¬ªª®«¬¬¬¬¬©¬¦®¨¬¬¦¬§£§£ {xzxnuY`ItI:dM=WM?_D:MKBOI=MF:YSBUQBUF5OI=SI=QI8S?8OF?OB:SB8MF?IB8MF:MD=II=QB=OO=MQ=QM?UQ=YQ?SK=WO?U[IW]I`n]fktx©µ¸ÂÎ£Ô«Ö¬Ý©°ä¤´æ£¸æ§¹éª¼ë¦¼í£½ï©¾óªÀò¯Áó°Ä÷¬Æø¬Åú®Èú°Æú±Èú´ËúµÊú·Ëú¹Îú¸Ñú·Òú¼Òú»Óú¾Óú½Óú¾Òú¾Öú»Øú»Ôú¾Õú¾Ôú¾Öú¸Øú½ÔúÁØúÃÖúÁØúÂÚúÁÙúÆØúÄÚúÁØúÃÞúÄàúÃÞúÃÜúÂÜúÃÞúÄàúÄàúÃÞúÄàúÆÝúÆßúÆàúÇÝúÄáúÆÝúÁÙúÃÚúÀÛú¾Ùú¼ÙúÀ×úÁÜúÃÙúÁÙúÄÞúÅÜúÆàúÆßúÆÜúÆÝúÇÜúÅÝúÈÝúÈÜúÊÝúÈÜúÇÝúÈßúÇÜúÅÝúÂÞúÃØúÃÜúÄÜúÁÜú¿ÙúÀÝúÃÚú»Ûú½Ôú¾Õú½Öú¹Õú·Òú³Óú´Òú¹Îú¶Îú³Íú³Ìú³Ìú±Ëú²Êú±Êú²Çù®È÷­Ìö­Éö°Ãõ®Åó¬Çô°Âõ®Æõ°Æò­Æö®Ãó­Äó¬Äñ©½ñ¨Ãð©¾ë§Áê§½ç¢½ê§»çºä ¼á·å¡»áµß²Ü³Ù²Ö®Ô­Õ²Ð©Î©Ì¦Ã ¾¡µ¶x±{«¯°~±z£ogg|Y{wSqnMogMndFg_KbUBbS:YU?]ODWO?YQBUQFYM?YMDWS=UIFYQDUQBUS=YMBUM=WMBYUDUSKWWK]QDWO?UKBYODSSIYQD]YKYUD_YQ`oYgiUktxxª­«¶­»£³º¡µµ´»·»¢·¸»¾ ¶»¸º ¹»¡º¸¹»¢¹¸£»»¹¹¢¸¼ ¹»¢·»£¸¹ ¹»£¸¼¥º¼¹¼¤¸»¢¹¾¥¹¾¢º¼¤½¾¡¹¼¦»¼ ¸¼¤½¾¢»¿¤¸¹£»»»¾¥º¾¥¹¼¥¶½¡»»»¿¥¶·¸¼¢¼¾¥½»£º½¤º½¦º»¦¹»£»¾¦ºº¡»¼£»»¢ºÀ§¹¼¥º»¦»½¦»¾£¹»¢º»¥¹¼¤»¾»·£·»§¼½¢º¼¥º»§»»§º»¤·»¢ºº¢»»£º¼¥¸¸¼¾»»¢·»¡¸º¡·¹¦·½£µ½£º¼¦·»¢ºº ¸¼¢µ¸¢º»¡¹½£¹¾¢·¸¡·½£¹»·»¡¹º£·»¢¸º¦º»£·»¤º»¥¶»£»» µº¡¸¸¢³»¸º¥º»¶¹¢·½¢¸ºµ¸£³¹£ºµ¢··µ·³¶¶·¡¶·¡²·º»¤·¸¡¸¸¸·¶¶¥µ¸¡¸¶µ¹ ´¹µµ ¸º·¶¡µ¶·¸¶µ¡³·µ¹ ··µ·¹·³µ¡¸¸¢µ·£¸´·µµ¸¡¶º·´µ·³· ¶¸¢·´±·¡³¸¡¸µ°·µ³³¶´µ²²³³²¶°·µ³´³³³ ³µ³³´³²³µ±°¯²¯´µµ²³³®²±µµ°²°²µ²´°²²°¬³®±®²±¯¯¯®­±±®¬®¬°°®°®²¯³¯°­±­°±¯®°°²®¯®¯±²°®­±®²®±°­®°­®­­¬°®®«®¬°¬°¯­­¬¯¯­¬«¯ª¬¬ª­ ¡ ¢£ ¤¡ ¡¡ ¤¥ ¡¢¡¢£¤  ¥¡ ¤¤ £¢¡§£¢£ ¤¢£¦¤¡£¢¨£¡¡£¨¦§¡¤ ¥¡¦¢¦¡¤£¦¤¥¢¨¢£¥¦¡¨¡¤§©¢¦¤¨¤¤¤©¤¦¤§ ¢¥¨¥©¤ª§¥¥«¢¥¤§¢§¬©¥ª£¬¤¦©ª¦ª©§¢¬£¬¦«¤¬§«¥©§¨ª¬§©¦§¤ª¥®§©©¬¨­©©§­©¬¨¬ª¬¦«§¬ª­§¬¨§©­«¬©®©­©­ª¬«¬§®«®ª®©²¬¬ª¯ª¬¬­­¬¬±¬­®­«®©®¯®©­¬¬¬±«¬­°©¯«¬­¯¬¯¬®¬®­¯­³¨°­¯­³¯³®°¯°­¯°²¬¯­²¬±®­¬±¬³±±®¬¬³¯®®¬°³°±¯³¯µ¯®ª°®°ª±¬°©®¥©¥ tr_bQ|MFkQK`MKbOF[QSWQK[OF_YM[OKdMB[MK]MK]MI`KI[MKYKK]II[KKSIBYQDYQM[QK`MM[WQ[WK`UM]YM[[M]OK_SU_bU`i[l|nrxz¬»Ä¤Å§Õ¡­Þ¡·Ý¢¶à©³ç©¹ë¬¼ì®½ð®Ãï­Ãð¬Áó²Æô¯Æö·ÆöµÊ÷´ÊúµÌú¸Êú¶Ïú»Ðú»Íú»Òú¾ÓúÁÓú¾×ú¾ÔúÁÖúÁÙúÁØúÁ×úÀØúÁàúÂÚúÃÙúÁÛúÅÚúÁÙúÃßúÅÛúÁÚúÅÜúÆÝúÆáúÈàúÊßúÌäúÈßúÊáúÈãúÌæúÊãúÌäúÈæúÐåúÎêúÈèúÊæúÍäúËçúÏèúÌäúËáúËäúÆãúÆàúÁÞúÆÝúÃàúÂÝúÇÝúÊÞúÊßúÇàúÈßúÍâúËàúÌáúÊâúÌâúÌâúÍãúÊßúÐáúÌãúÌàúÈáúÇàúËáúÊáúÈâúÈàúÈâúÇßúÇãúÅâúÅáúÂàúÀÞú¾Üú¿ßúÀÝúÃÚú¾Ûú¾Ùú¾Ùú»Õú»×ú»Ïú·Ðú¹Íú»Òú»Ïú¹Îú¶ÎúµÊù³Í÷µÎ÷³ÈöµÉø³ÈùµÌö°Êõ³Ìö³Èõ±Åð³Èò±Ãó²Èð­Ãí¬Äî©Áì§Àë©Âê¬¼êª¿é§»ä£¾ä¡»æ¤·ã¡ºÛ ´Ý¡´Ú ³ÙµÕ³Ñ¬Î­Ì¬Å¤Á¦¿¡³§«­­ wwqk{`w[{lUwkUqiQk[OlWKfQOfYMd[M_WM`USdQK`YMdWM`SOdUSbYMdWK`UM`UMdQO`WYb[Qd]OkWOfWMbUQgUQ[UUgWOf[YgbOl`Wlk`lo`zw{­  µ³·¦°½ªµ¿©À¼¢»»£¼½§¼¼§¾½©¼À¦¼¼¨½¾«¿½©¾¾¨¾¾©¼À¦¾½«ÁÁ§»¿©¾¿§¿¿¨½¾¨À¼¥¿¾¨¾Á¬Â¾¬ÁÁ¦½À©Ã¿¦ÁÁ¦¿Á«½Á§ÁÀ©ÀÃ¬À¿¨º¿¦¿¾¨¾À«ÁÀ¨¿¾¬¿ÂªÁ¾«¾¿¬½Á§À¾«À¾ª¾À¦¿¾­¾Ã©À¾§¿À©¿Á©¿Â«¼¾¨¿½¦½À¦¾Á¬¿¿©¾Á¯¾Â§¿À¬ÀÁ¨À½§ÀÂ¦À¾§Á¾¨¾»¦ÁÀ¬¾À«¾½§Á¾¨½¾¨¾¾©¾¾¨Á½«¼Á¨Á¾§À½¦»Â¥À¾¦¼¿¬¾½§»¾¬Á¿«¼¾«¿¾¦¿½©¿À¬¿¾¨¼¾¨»½§¾¾¦¾Á§À»¨¼»¬¿À¨½½¦½¾ª¿½§¾À¨Á¾©À¼¬ÁÀª¼¼©¾½§¼¾¨¾¼«Á½©À»ª»¿¦¼¾ª¿¹©º¾¨»»£º»¤»»¦¼½¬»¼¦»¾¨»½¬½¼¨¿»©»º§»»©¼»¬»º¥º¹¥¹¾¨»º¥»»¦½¼¤¼»ª¼»£»¼¤º½¦½º©¼½¦»º¨»·¥¸»¨º¼¨»»¨·»§¹¼¥»ºª»¾¦»º¥º¸¤»·©»»¤¹·¢¹»¥¶º§»·¢º»¥º»¤¹·§¹·¦¹¹£·¹£»¹ º¹¨º·¥¸·¥»»¤¹·¤··¥¹º¤·¹¥¸·¡µµµ¼¤º¶£º¶¤¸¹ ¸³¡·µ¢¶³¢´·µ¹£·¹¡»´¢¶³¡¸¶£¶µ¡´´¡³¶£´³¥¸³ ³¶ µ±¡³µ ³´¢²³ ´´¡³³µ¶¤¶°´³ ´µ·´¢´´¶³¡³°¡³´¹´¡´°³¶³³¡³µµ³°³´µ¢·²µ­´µ²±³²±°°¯µ²³³²°³³¡²±´®³¡¡¡¡£¡¡ £¡£ ¢¢£¡£¡£¡¡ £££¤¢£¡¢¢¥¡§£§££¢§££¢¡¡¥¢£  ¤¥¥£¤¢£§¢¥¤££¦¥¦£¥¡£¤¥§££¥£¥¥©£§¥¦£¨¤¤£¨¥©££§¦¦¤£¤¥§§¦¨¨¦©§¨§«©«¤§ª¦£§§ª©§§©¥§§¨¦ª¨¨©¥¥¨¥§¨¦£ª¥«©¨£ª¦¬§©§¬©¬¥¬««©¬ªª©§§¬¬¬­®¨¬©¬¬©¦¬¨©«©©¬««­¬¬®©¬©¬ª¯ª®¬¬¬«¨¬ª¨©¬¨¨¡©¦¥£¤|¢~|xrw`fI|Q:oI:]F8UDFUF8QI=QI?SM=QD=UI8UD8OF0MF8OB5OB5QD=QK8K:5QD3FF=OB5SF:QIBQI8UI8QS?SI=SIBYS:UIBWIBSYI[bUd{glrr{¬¸Ã Æ¦Ò§ÙªÜ¬Ú°à§µè¦·ê§¸î§»é¥½î©½ð¬Áô¬Áò³Äô®Åõ®Ã÷¯Áú³Çú´Éú­Ìú·ËúµÐú´Ðú¸Îú¸Ðú¹Ñú»Ðú¹Ðú»Õú½Õú»Òú¼Ôú¾Øú¾Õú¾ØúÀØú¾Ùú¾Õú¾Öú¾ØúÃØúÀØúÁÙúÆÙúÆÜúÇÞúÉßúÈÞúÊâúÈßúÇàúÇßúÌãúÌäúÊáúÊäúÈåúÉåúÈäúÆäúÃäúÆâúÃÝúÁÞúÂÚúÀÜú¾Ýú¿Øú¾Úú¾×úÁÜúÄÙúÆßúÇÝúÊÝúÈàúÊàúÆÞúÃÛúÆßúÇÜúÆÜúÆÜúÄÛúÄÝúÅÛúÃÜúÃÜúÂßúÃÛúÄÞúÁÛúÁØúÄÜúÁÜú¾Ýú¾Üú¾Úú½Øú»Ûú»Øú»ÕúºÕú¸ÕúºÕú¶Ðú³Óú³Ñú³Ëú³Ìú³Êú¶Îú·Ëú¯Ê÷´Èö¬ÆöªÇô°Æô®Åô®Åó­Äõ®ÇñªÃô¬Ãò«ÃïªÁðªÂî©»í£Áë¦½è¢¾é¡»è£½æ¤¸è »ãºä¡·á³à´ß³ÝµÙ±×®Ò¯Ò­Í©Í¬Ì¥Ä£À¤À¡¸|¯z§w©w«z¥wlg`wU{lSugFr`Id_BgWD_O=`OB[OBYQ?UODYOBUIDYQ?UO?WKB]KBYUFWI:YM?YO=YK=YMBYQI]Q=_M?YMFUQB[OBYQIUSIYUK]]F`UDd]S`gWklgr¦®¨²¯· ±» ·¸º·¸»¡º» »º¸»»·¡º¹ºº¢»»£½» »»¤¸¼£ºº¹» ºº¡½¸¡¸½ »¾¥»¸¡»¾£½»£»½¡¼½¤º»¥»¼¦»¹ºº¥»»¼¼¢¸½£º»£º»¾º¦½» »»¡¸¾¤¸¾¥»¼ º»¹»¤º»¤½»¢º»¡º½¢¼½¥º»¥»¹»»£»½£½º¢»»¤¹º¡¹»¢»»£»½£»º£¾»£·»¦»»¡¸º¥¸»¢»»£¹¸¡¸»¥¹¾¡¹º¡µ»£·¸£»»£»»¤º¸¡¹·¹¹£··¡¸»£º¹£º½¥»¹£º¹£»¹¤¸»¡»» ¼½¥··¹º¹» ·¸£¹¸¡º¹¢¸¹¢¹»¡º» ·»£¸º¢½¸£¶¹¡¸¹ »º¡¹½¡»¸¡ºº¡¸¸¡º¹¡¹¹¤´º£·µ¢º¹·º¡¹º ·¹£¸·£··µµ¡¸½·µ£»·¡·¸ ¹· ¸¶±·¡·¹µº¹¸¢µ¸ ···¹¶´´¸³¹¢·º£³µ·µ·¸¢¶µ·µ µ¸³· ¸·µ··¹·¸ ·µ¡¶¶µµ¡³·³¹¶´·· µ´ ·³¶¶·¶µ´·¶²³ ²³µ·´·³¸·³³´µµµ¶³¶´³³µ³²´´³³´´²²®²³±²³®²²²±³³²²²²´µ²´±±³±²³­³³¯±¯²²±®­¯°®®¯¯¯®²³®±¬²°°±±¯«°®®¯®²±­¯¬¬°¯­­¯¯­«¬­°­¬¯¯­±®­®¬¯­«¬­ª¬««­­¡¢¡ ¡  £ ¢£ ¤ ¡ ¤¡¡£¦ ¢ ¦§¡£§¡ ¡¥£¡¥¥¥¡¤¤ ¦¤¡¤§¢¥¡¦¢¤¢£ §¡¬£¡¢ ¨£¨¢¡£¤¢§¤§ ¥£©§¨¢¦¤¨¤¦¤«¡ª¥¨ ¦¢§§« §¡©¦§¦©¤¨¤©¤¨¤¬¢¨§©¢«¦¨¨§§©¦ª¨ª¥¥£©§ª¦«§ªªª©«««¢¬¬«¦§§¬¨¬§®©®¨¬¦°§­ª¬¦¬©®§¬©¬¬¬¨«©®©¬«°©®«®«¯©©¬¯§¬©®«­¬®«­ª®«­¨¬¬¬¬®®¬«²¬®¯¯«±¬¬©¬®®«¯ª­ª°¨³¨®¬¯©³®±­±©®®²®±­²®®­°®±«±¬¯¬³­¯±°±¯¬²¬´¯°¯±®°°²¬±¬¬©®¦­ª¬¤®¨ ¥¤uxddO{OKoMKiKF[OQ[OD]QK]OQ[OM]OK`SI`MI`MM[MK[QBWFDYMM]KKYKD[KFUOKSMF`KK]OM[OD_OI`SM[OF]MK`UF]SK`QO`bUboilqw~£²¿Ê§Ë¬Ì­Û ±Û¤µá¦·â­·ê¬¼ë®¿ï¬Ãï®Ãò²Âô°Äõ´Æô´Æù¶Ëù³Èú³ËúµËú¶Ìú»Ðú·Îú»Ðú¹Òú¿Öú¿ÔúÀÓúÁ×úÁÛúÀØúÃÕúÂØúÃÚúÃ×úÆÚúÃßúÄØúÃÞúÃÚúÅÜúÆÛúÈÜúÇÜúËßúËßúÌàúÒãúÏäúÎäúÒçúÎçúÎèúÒæúÒêúÖêúÒìúÒìúÐíúÑìúÕíúÎçúÎìúÌëúÆçúÊäúÅâúÅâúÄâúÄàúÅÝúÆßúÊâúÊßúÉâúÎßúÐâúÐãúÌãúÈãúËãúÌáúËßúÍáúÊáúÎâúËàúÉâúËãúÊâúËãúÊãúÉâúÊãúÊãúËåúÉäúÉáúÈáúÆáúËâúÄÞúÁÝúÃÛúÃÛúÁÙúÁÚú¼×ú¼Øú¹Õú»Òú»Òú»Ðú¼Ñú¹Ëú¹Îú¶ÏøµÊú³Ìö³Êö³Éö°Ë÷µÆö³Èõ²Æõ°Èô°Èñ­Åñ¯Áð­Æï­Âí«Ãíª¿ì¬½ì¨ÀìªÀê¨¿é©¾è¦¿ä¢¿â¦»â£·Þ ·ß¤·Ý¶Ú°Ø³Ô³Ð°Î«Ì¨Ê¬Â§Á¤»¢°²±©~£wrn|bu`nSzi[oiSn_MgWKi[Q`[OdSKb]MfWO[QMbUM`UKdUMdSO`[WdQKiQMdWKbOSgWK]]Sf[KfUQ]WWdSKgQK`[U_WQf_Yd`Sd[Qlb[ii]ond~ªµ ª· µ¹¨¸½¤¹¾©½»§»¼©»½§¼¿¬½¾¨Á»¤¾¼¥À¿©½½ª»»¦»¿¬¿¿©½¾§½¾¦¾»¨¾¼¨ÁÁ¨¾¿©ÀÁ¨¾Á§À¿¬Á¼©¾¾¨¾Àª¾À¦¾¾§ÁÁ©ÀÁ©Á¿¬À¾©ÂÀ«ÁÀ«¿¿ª¿½©À½§À¾¬¾Â¬ÂÀ©½¿ª¿¾«¿¾ªÀ¾ªÀÁ¨À¼¥¾¿¬¾¿ªÁ¾¦¿Á«¾¿¤¾Á¬¾¾ª¿À«¾Á¨¾½¨¾½¨¾¾©¿Â¬»»¬¿À§Â½¬ÀÁ©¾¾§¿»§¾½«¼¿©¿½¬ÀÂ©¾À¬Àºª¼¿©½¾¨¾¾¨¼¼ª¾À¦½¾ª¿¿¬¾¼¬¿¼§¾Áª¾¾¨½½¨¿½¬¾¾¨¾¾¦À½ª½½¬¾À«¿Á«¾Á¬¾¼¥¾¼§¾»«¼¾¦¼¿¨¾»¬½½ª¼½§Á¾©»À¦¿½©¿»©º»©¾¼§»¾¬¼¼¬½¿©À½«¾¼­¾º©¿À©ÁÁª»½§º»«¾»©»¼§¾½¦»½©¾»©¼¹¤¹¾¨»»£½»¥¼¾§¹¾¥ºº¥º¹¦¼»¥¼º§½¼¨º¼¨»º¢»¹¤»»§¹·¦¹»«»¼¨ºº¥¾¸§¹¼§¹»¨»¹¨»¼¦»¼¤º»£¼¹¥º¹¥º¸ ¹¹£½¹¦¹¹£»¸¦ºº¤¹¹¹»¦º¶£¶¸£¹¸§¹·§·¶¤¸·¦¹·¤¸µ¦»¸¤¶»¥··¥¹´¡¶µ¢¹¶¡¹·¢·¶£··£·µ»µ ·³¡µ¶ ¶¶¦··£·´··¤¶µ³³¤¶¶£µ¶£·³¤¶³¸³³¶·³£´·¢³±£¸³¶² ²±µ³¡´³ ²³¡´µ¶³µ·³³·µ¢·µ ³³ ¶³ ³±¤³²´´ ´®µ³³® ´µ³²³³´³³±³¯±³°°³³µ²´°°¢¡¡  ¡¡£¢¢ ¡¤¡¡¢ £ ¢¢¡£££ ¡¡¡¢ ¡§£¡¢ ¥¡¢¢£¡¡¤¡£¦£¤ ¤¡¢¡¥¡¥£¤£¦¡£ ¨¢¦ £¥§¡§£¦¡¥ ©¨¡£¥¡©¦¥£©¢£§¥£§£££¦¤¥¤¤¤¥¦©¤©¤ª¥§¢©§¥§ª¤©¦¨¥¨§¬¤«¦ª£©¤¬§¥¨©§©¨§©¨¦©ª«¦ª§¬¦«§¨¦«¨¨«©§¬¦«««¥¬ª«©«©«¨«ª§§¬©¬ª§§¬««¬«ª¬¬«ª«¬¬ª®¨©©°©«­««­­­¬¬¬¯¤¬§¨§«¨¦§¦£©£|ugrSUBqO8bI=YD8YI=QK?QD:UK?SK8UK:WK?QB:QB:S?:OI8MB8OF5MF=MF8O?5QI5MB?QD8QD=MM=YM?YM8QK=UK=UK8UM?QMB[]O_td`kzt~¤¯¾ÈÐ¨Ð¯Ù­Ø²Ýµá¤´ã¦¹ç£ºî«ºì§¾ð¬Áñ®¿õ°Ãö­Ãóª¿ö¯Â÷°Çú­Èø²Æú²ËúµÊúµÍú¶Ïú¶Ïú·Ñú¹Òú¸Ðú»Óú¾Öú¼Ôú¿ÓúÁÓú½Ùú¿Õú½ÖúºÖú¾Õú¾×ú¾ØúÃ×úÁÛúÄÚúÇÜúÇßúÉÝúËÞúÍÝúÉàúÉáúÍãúÎâúÑäúÑæúÕêúÓçúÐéúÓêúÎêúÏéúÏíúËçúËçúÄäúÄßúÇáúÅâúÁàú¾ÝúÁÝúÂÜú¾ÚúÃÜúÂÜúÇáúÊÝúÈÞúÉáúÅßúÃßúÃÛúÃßúÆÝúÆÜúÆÝúÆßúÈÜúÆÝúÇàúÈÞúÆáúÆßúÆáúÇàúÊÞúÁàúÂÝúÃÝúÀÜúÀÜúÁÛú»Üú¾Ùú½Öú»Ôú¸Øú¹Öú¹Òú·Òú·Ïú·Ðú²Íú·Îú´Ìú±Ìö¯Æö®Êö¯Ëó«Äô¯Æò¬Ãó±Åò¯Äò¬Åï«Âò©Âò§Âí«¾ì¥¿í§¿ê¢¾é£»è½ä ·ç¤¹è£»ä ºä·â¡µÝ³Ý ·Ü²Ü²Ø°Ù®Ò®Î¬Í¬Î¨Ì¨É§Ã£¿¡½·~©{°~«z¡unf[qWulOrdQq`Fn]FgM=bO?_O=]M:YQ=UMBYMBUK=[OBWI?YM:]SFUIBYM=WODYQB]QD]YM_S=[MB]K?[Q?WOF]UI[YD[YD`YDdYF`UIb`QddYoxww µ¢³°³ µº£´»¡¹·¸¸¹»¤»½ º¼¡¹»¢»º¡¼¸¡·¼ »»¢º·»»¹» »¹¹¼¢»¹¥º»§»»¡º¹½¼¡¾¼¥»¸º»¢º·¢¸º¦½¾¢À½§º» »½¡»¾¥»¾£»¹¢¾¼¤¸½¡»»¥»»¡¹»£¾¾»»¥»¼£»¼£½¼¡»½£·»¥½»º»¤¸¾¡»º£º¾£º½ º¾¢º¾¡»»¢¹»¤¸¼¢½»£½¾£¼»¢»»§½»¡¾¾£»»¤¼º¤ºº »½¥¸ºº»¸»¥¶º£»¹¡º¸¢¸¸¡º» ·º¦¸¹¢º¹£»»¤º»¡ºº¡»» ¹º¢¸º¢»¹¡º· ·º¢º»¢¸»¢»·¡»»¤¸½¢¸¸¡¸»¹»¥»½¡µº¡º»¥¹¸£¹º¼º¤»¹ ¸¸£º»¡¶»£··¡»½¦º¹¢¹·¡¹¸¢¶º¢»·¡¹·£´¹·¹¶·¡º¼·¶º··¸µ· ·µ·»¡¶·³¶··µ· ¸···³»´µµ¹¡¶º·³¶µµ··· ¶º ³µ ··³º¢¶¸´¸··µ¸ ¹µ¸´ ·¶¡µ¶¶¶··¡¶¶¶··¶ µ¸³´µ´³²³³´µ³·µµ³·²³¡²²²³¡¯³²µ³³°µ³³µ°±´°²²´±²²³´±°³±³³²®¯³¯³¯°²²²­¯³³³²²¬²²°±­¬³¬°®¯®²«°¯¬¯¯®±²²®¯®°²±°°­°­®¯¯­°®°®®¬®²­¯¬®±¬««­®³­¯¬¬­°«¬°« ¡§ ¢£  ¡¢£¡¡ ¡£ £¤ £¢££¥¦£¡£ ¡ ¤¢ ¡¡¤ ¦¢¡£ ¦¡¥ £¢§£  ¦¡¥£¦©§ ¤¤¦¡¥¤§¢¨¡¤¤¨¤¨¢¨§¦¢§¥¦¤§¢©¥¦¨©£ª¤¬¢§¤¨¥¨§¦¥ª¤ª¨©§«¥ª£§¦«¡©¥©¦«¦­¨­¦ª¦ª¨ª§­§¬¦¬¨«§¬§ª§¦¤¬£¬§©¨¬ª­«®¨­¥­¬¬ª¬¦®¨¬¨¯¦­¨¬«­§°¥«¬®©¯¨±«°ªª¨°ª«¦¬¬¯§¯«°ª®ª«©¯¬®¬­ªª¬±­¬«²­¯©­­­¨²ª¬¬­¬³¬°¬­«¯ª®®²¬¯¬°¯¯ª°ª­¬°®±­³®°«°ª´°±±®¬²¯³°³®°­³­°¨°¨®­­°°¬¯¡¬¦ |ru[QKxOFgMK]ID[MK[QQQID[UO_QKWQIbMF]QOWIFYIKYSDSDD_MIWMFYFKYIIYOIYOD[OF[KKWOF_QK]KK_QO[SK[OF]QM]WS`kbkrnw ¥¯ÃÎ¡¨Ù³Ù¤³â¡¶ß¥ºà¦ºç©´ê¬¾í¬Áï¯Âï°Ãò²ÄôµÆö³Çõ³ÈöµÉú³Êú¶Ëú´Ìú¸Îú¸Ïú»Îú»Ìú»Ðú½Ðú¾ÖúÀÕúÂ×úÂÖúÁ×úÂØúÅ×úÄ×úÁÛúÆÛúÅÙúÃÞúÆÜúÃßúÉÝúÌßúÌâúÏáúÌßúÒáúÐãúÏàúÓçúÒçúÑèúÕèúÛìúÚðúÜîúÛîúÙíúÚïúÚñúÖñúÙðú×ïúÓîúÐíúÎìúÍëúÌæúËçúÊèúÈæúÆãúÆäúÈàúÎáúÌäúËãúÍäúÏãúÐãúÌàúÌæúÈâúÈáúÉâúÌâúÌäúÌãúÌáúËäúÍåúÎçúÌäúÒçúÌèúÏåúÊäúÅäúÈäúÉâúÈáúÊãúÈàúÅàúÁßúÆÝúÁÛúÀØúÂØú¼Úú½Öú¼Õú»Óú¹Òú¼Ñú¹ÑúµÐúµÍú¹Îö¶Ì÷¶Í÷¶Èö±Çö³Êô²Êó±Êó°Éó³Åñ­Åï°Çð­Ãí¬ÁîªÂí§Áê¨Àê¦¾é¬½ë¬¾éª»æ¦·ä§¶ã¡¸ã¦¸ß¤·Þ¡¶Ü¥´Ú¡µÖ³Ò±Ó­Ï¬Î¬Ì©Ç¨Å§À¡À¥³£²±¥¤xwf|dw_~q[xl[rgSlWIgYKbUS`SM`SI]WO_QMfSK_SS_OKbWF`UQ_QQfSKdQObUMbSS`_W`[IbUSdQO]WQ`SQ`UU_[Sf`Sf`S`]Sg[Skb[qf`nxz¥³¡¨µ³³£´À«¹Á«¾¼¥»¹¥º½¦¾Àª¾º¨»»¥¾À¦¾¿¥¾¾¦¿»§¿¼¨À½¨¿¾¨¿¾¤¿¾¦¾¼¦À¿©¾½©¿»¤Á¾§Á¾ª¾¾¨À¾¨¾¾¨½¾¬Á¿ªÁ¾¬½Â©Á¾§¾À¨½¿¨Á¿©À¾¬¾¾¬ÁÃª¾¿¥À¾§Á¿¥¾Á¬¾¾¦¿¼¨Á¾¦¼Á¨À½¬Á½¦À¾«¿À¨½À©¾¿¬Á»©¾¿©À¾¨¿¿§Á¾©¾¿¨¾¾«¼À©À¿©¿Á©À¾¬¾¿¬¿½¨¼¾¬¾¾©¾»¦¾»¨½½¨¼½©¾¼§À¾©½¾ªº½¨Àº¨»¾¨¼¾§¾»¨½¾¨¼½§¼¾¦¿¾¦»»ª¾¼­¿¾¦¾¿§½¼ª»½¦¾Á§¼À¥¾¾¬»¿¨¾¾§¾À©Á¿§Á¾ª¼¼©½¿¬¼½ª¾½§½À¬¿»¦À¼ª»¾¨»»¨»¾©Á¿¨½¿©¾º§¾À©½¾§À»§»»¦»¼«½½¤»»¦º¼©»½§¿»¨¼½¨½¹¥¹»¦¿½ª¹¹¦ºº¥º½¨»»§»»¦»¹§º»§¹»§»¹¥¶»¥º»¦À»¨»¹¦º¹©»º©¾»§¿·§»¹¦»½£¼º¤º¹¤»º¨»¸¥º»¦º¼£¾¼§¹º¥·»¢º· ¹»¤º¸¨·¶¢¹·¹¸¡·¸¡¹¶¥·»¥¸¹¤»³¦¹¼§··¢·¸£º·¢»¹£¹· ¶·¢·¹£·µ¢¹·¦¸¸¥»´¤·¶ µ´ ²³£ºµ·¶¢·µ ··¢·µ¡·´¢µ´¡··§·· ·µ ³³ ¸´¡·´¤´³³²´³ µ¶·µ¥µ®³µ¢µ°¤´³³²³´£µ¶¸²´³µ±µ±¶³²¯³¯¤´´³³³¯µ²µ²¡³³¯¯³³¶³¶³¡³­¢³³°±³° ® ¢¡¢ ¡  ¡¡¡£¢¤£¡ £¡££¡¢ £¡¥¡¢¢¦£¡¢¢¡§¤¤¥¡¤¤££§£¦¢¢¥¡¥¡¦¡¥¦¢© ¤¤§¥¨¢¦££¤¦£¤§§¥¦¡§¤¥¥§£¦¥¦£¡£¨£§¥ª§¥§££©¥«§§¨¥§¦£¦¦§¦«¨§¥ª§¬§«¤¨§«§ª§§©ª¥©¦§¥¨¨§¨«§«§¬ª¨§©¦§§¤©ª¤¬©¬¬¨¨©¦¨¬¨¨¬©©¨¨«­¬¬§¬§­«¬¬«©¬«®¬«¬¬ª­¬®¬«¬¬§ª¦ª¬«ª©««§§¥z~~wr|YbOwI=gD8WD=YF?OF:SK=SF?OF:SI?OD?QD5QD=QI?QD=QB:QF:M?=OF:Q??MD:OI=MK:KD=UK=OF=QK:QF=UKDQI=UI=QODWWKYg[bgiqzx¢³ÃÍ¤Û¢®Ü²ÝµÝ ´àµæ§·æ¨¸æ¦·ë©½ï¯»ï­¾ï¬ÁóªÂô¬Áó¬Ãö¬Ã÷±Å÷²Æø°Èú²Ìú²Êú¸Îú¶Íú¸ÒúºÎúºÐú¼Ñú½Óú»Óú½Óú¾ÔúÀÖúÁÖú¿Öú¿ÖúÁÚúÄÙúÀÖúÃÖúÃÙúÈÙúÇÚúÇÛúÊÜúÎàúÍÞúÐàúÏáúÓæúÕæúØèúØëúÙîúÖîúÖíúÓëú×íúÕíúÕîúÕïúÓîúÑíúÑçúÎçúÊèúÌæúÊäúÅáúÃáúÇàúÃàúÆàúÊáúËàúËßúËáúÊáúÊàúÇßúÇâúÅáúÅßúÈÜúÆßúÊáúÊàúÈßúÊâúÊáúÉãúÈáúÍâúÈáúÇãúÈàúÅáúÅâúÊàúÅÝúÅÝúÁÝúÀÜúÀÙú½Øú»Öú»Øú»Õú¶ÕúµÒú´ÎúµÎúµËú³Îú³Ìø°Èø³Çö²Éö¯Çò°Äó°Åó­Ãô®Æô¬ÃîªÃð«Ãî«Àé©¾ì§Àé¦ºç£½ç£»ç¡»æ¥¸ç·ç§ºâ»ã¶á¡µà´Û³Ú²Ù²Õ«Ø¬Ô¬Ò«Ð«Í§Ê¦Ê£Æ Ã¥Á¡Àµ{°°|ª{¡trb|]|rWqkQrdQnbIlUFbK:`M=YO?[I=WU?UKFUI=WUD[KFYOBWM:WODSI:UQ:UMFSUI[UIWSIYKBYODYQIUMI_IB[QKYUI`SK`]MbUD]UId`Udoou¬®¬³®·³¹ ¶»£º¹·»·¸ º·ºº¢º» º¹ »¼¤¸¹¡»¸¡»»¤º½¤¹¸¡º¼¸»»¹¼»·º£·¹º»¡¸º¤º¾¡»¹£¹¾¢º¹£º¼¥»¾£º½£»º¡º¼¥¸»¢»»¢·¾£·»£»½¤¸¾£»½¢»»£»¸¥»º£»¹§º¼¡¹¹¥º¼¡½¾£¹º£½½£º»¦»¿£¹½¥»¹£º¾£¾º¡¿·¢»½¢¸½£»½£º½¦¹»£¹¼¡»½£»·£»» ¸»¦¸»¡·¸ ¶»¤·»¤»¹¡·º£¹¸¡»º ºº¢¸º ¸º¡»· ¸¹£·»£»¸¡»¼£·¹¢¸»¢º¹§·½£·¼¤¸»£ºº º»£·»¨ºº ¸¹¤·»¥º»¤¹¸¦»¹¢¸º¡·¹¢·¹¡»·£¸»¸¹¡·»¡¸»£»»¦»»£º·£·»¸¼¡¸¸¡¶· ·¸³¸¡¸·¡³·£¹¶¢¸¹¸···¡»¸ ³¶´º´· ¶µ·¸·· ¸¸³¸¢µ¶·µ²·¡··¡·º¸· µ··³ ³·¡´·¸·¢µ¸µµ£·´µ·¡´··¶ µ¶´³ µ³³· ·µµ¶¶µ²µ³²·³¶¶¡±µ²²¡´¶³µ³¶·¹³³³²²´³³´µ³³²µ³´·°±´µ³°³²³¡²°¶°±¯µ±²°²³±³³±°³¯²³³°²­³³¯­®¯¯¯°°¯®®­±°¯«®¯°®¬±¯³°°¯¬°±¬­®¯®®®®®®±±¬®­¬¬®°¯­¯®¬®®¬¬­«©±®®®¬¤  ¡¤ ¢¤ ¡¥ £¡¦¡ ¡¢¤¢¦¢¡¢¤¡ ¥£¤ ¡¢¡¢¥¡¤¡¥£¤¡¥¤¢¥¡¥¤¢£§£¢¡©¤¤¥£¥£§¢©¡¤¥¢¤¤¨£©¤ª¡¥¨ª¥¨ ª¥¬¢¨¥©£¨¥©£¬¤«£§¥¦¨¨¦¨§¬¦©©¨¦©¤§¦©¦¬¤¬§¦§«¤¯©¨¨­¤«¨¨¦¬¨¬§¬¨©§¬©§¨«§®©¬¨«¨¬¨®¬¬ª¬¦­¨«¨¯ª¬¬«ª­«­¬«©­®¬¥®¬¬­°¨®¬¬¨°ª¬¬®©¬¨­«¬©®ª³¬®¬­¬¬­°ª¬ª²®¬«¯¬¯¬±ª±«²¬³¬¬¬²«­¬¯ª²¬­®°­³­®°±¬²¬±¯°¬¯­²²±®°¯µ²¯®®¬±¬®¬®¯±¯°®³¦®§ ¢qtf[QtOFiMI`KQ_MM]UO]OI_QIYKD]QKWKI]KF[MIYII_KKQKIYMFWDKWIKWKIWFI]OF[OKUFK[OK]QKWKB]MI`SM_OF_OI_[S_f[frbnqw{ ¨»È¨Ò¦©Ý§³ã§·à©»æ©»æ¦»é¬»í¬¼ê¯Àï®Áò³Áò®Ãó²Ãô±Çõ³Æø´Çú¹Èú¶Ë÷µÊú¸Ëú¹Ðú´Íú¸Ñú¹Ðú½Ôú¼Õú¿Ôú¾Ôú¿ÔúÃÖúÃÙúÅ×úÇÙú¿ÜúÃÚúÄÛúÆÙúÈÝúÌÞúÈáúÌÝúÌàúÎàúÍáúÓäúÒåúÖæúØçúÙéúØíúØîúàïúßñúÜòúÛðúßòúàôúãóúàõúáôúáòúÞöúÝôúÜóúØðúÓòúÕîúÓïúÑìúÌéúËéúÌçúÌäúÍæúÒäúÒäúÓéúÐëúÐäúÐêúÐåúÍäúËäúÏçúÐäúÎçúÎèúÒèúÑéúÕçúÓëú×éúÓëúÐìúÌèúÔëúÑëúÓèúÍéúÌèúÏäúÉäúÅãúÃáúÅßúÂÛúÁÜúÂØú¿Ùú¾Øú»Òú¼ÕúºÔúºÓúºÓú·Ðú·ÍúµÌøµÉö¶É÷¶Ëõ³Çö·Êõ¶Èò³Æñ­Çð¬Æì¬Ãï¯Âí§¿ë«Áé¨¾é¬¾ê¦¼ê¥½é¬¾å¦¼ã£¹ß£·à¢»ß¤·ÛµÙ´Û¢³Ø±Ò°Ò°Ó®Ð­Ì­Ë¨Ë¦È«Ä¤Â¥À¤·³³~©¢wllzbu`{l]ukWo_QfUIkWKbUMgOKbWK_OM`SMb[O`QQdYKbQM_MK[QOdYFbUO[[SdUSg[WdQMdSM_WUbQQ`WOb]S`]Ul]Wbb]kbQiYSod]nwqx²¡³­¶ ³¹¤´½£¾·§½¸ »¼¤¾º§»¾§¼½§À¾¥¿½§½¾«¾½¨»¿¨¿¿¨¿¿¥¿¼¦¿Àª¾À©½¼§¿¿ª½½§¾½¥¿¿§ÀÁ¨¾À¥¾¼«¾Á¨¿½©¾Áª¼½¬Á½ªÀÁ§½Á¬ÁÁ¨Á»©¾¾¥À¿¨Á¿©¿À«ÀÁ¨Ã¾¬À¾©¿¾¨¿¼¬ÁÀ§¿¾­À¿§Ã½§ÀÁªÀÂ«ÀÁ¬ÂÂ¬¿»ª¿À¨Á¼ªÀ¾«ÀÁª¿À¨½À§Â¾ªÀ¾¬¿Á«Á¾§Á¿¥½¾§ÀÁ©¾¾ª¾½¨¾¾¨¾¾¬¾¾¬Àº¨½¾¨»½¨¾»¥À¾ª¾¾©¾»§¾¹¥»¼§»¾©¾»©½¾­»¼©ÁÀ¬¿»«½½¨»»©¿¿©¾½¨¾¼¬¾½«¾½©»¾¨¾¿¨»½¨¼»¨À¿¨¿¼©»¼¨¼À¨¿»¬¾¿¨¼½©½¾©¼¾¦À»©¾½¨½¾¦¾¹¦·½¨¼»¦»¾¨»¼§»»ª¼»¦»¼©»¼¨½»¦»»§»¾¦½¼¦½ºª»¼¨º»¥»¹¥»»ªº·¥¹µ§»½¥ºµ¥¼¹¤»¾§¾½£¸»¤¹·¦¾¼¤¾º§¹º§»»§º»ª¸»¦º¹§¸»¤º¸ª·¼¥ºµ¢¹»§·¼§¹º§¹»¤·»¥»»¢¹»§¹·§¸¸§·¹¦º»¤»¸£»¹¤¼¶¢µ¶¨»·¤¼·¤·¸¥¶´ ¸µ·¶¥¸·¥··¦µ¶£·¶£´¸¤¹¸¤µ³·¸£´³¢¶³¡¸¶¢··¡·³¥´´£·¶¥µ³¡·³¡¸·¤·¶¤µ´¡³¶¡·³·°¢µ³¡²³¡´°¢´µ²¯¶±¶µ±² ±°µ´£µ´£¶´ µ¯¡³¶ ¶³£³°´´ ²³¡³° ³µ³² ¶³ ³µ¡±²¶±µ³¢³²¢³¬´±³°³¯±¯±|¡ £¤¡¡¡¡ ¢£¢  ¡¡££¡ £¡ ¤¡¤¡ ¡£¡¡¡ ¤¡¢¢¡¤¤¢¤¤££¦¡£¡£££¥¢¡¥¥£¦¥¦¥¤¤ ¢¥¤£¦¥¤¢© ¥¤§£§£¥¢§¥¤¥§¢¨¢££ª£§§¦¦©©©¥©¤§¥ª¤ªª¨¥¥¨§©¦¦¦§¥§§§ª¨¨§§©§©¦¥ª©«§ª©«§­ª¬¨¨¨¬«¨¦©§«©¦©ª©«©ªª©ª®¨««ª¨«ª¬¥©§«ª«¬¬©¬©ªª­ª¬«¨¬«®­ª«¦ªª«ª¬¬«§¨¥w|~~t`[MuM?`F=U?8QIBWQ?MIDUD8QIBSK5O?:OF?MF8QD:QD:OD:IB:MI8K??I=3KD:FK:MF8KM8MF8SI:QO?OM=UD=QI?YIBOF=WSFU]S]n`l{ilwz¡z«½È Õ §Û£®ß³ß¡·á£³ã¤¸ã§ºê§·çª»ë§¸í«¼ò«¼ï©¾ð®Áò¬Áô¬Âô¯Áù®Ã÷®Æù´Êú¯Éú²Ëú®Èú¶Éú·ÍúµÓú¸Îú·Ðú½Ñú»ÒúÀÐúÀÒú¿ÔúÀÔú¾Öú¾Óú¿ÕúÁÖúÃÚúÁÛúÆØúÆÙúÈÜúÈÜúÎßúÓáúÓäúÐâú×ãúÖçúÚëúÝìúÛïúÜïúÝïúÜñúÞñúÜðúÝðúáóúàôúàöúâôúÞôúßòú×òúÕðúÖìúÐëúÍæúÎçúÉæúÉåúÐåúÎâúÏáúÐäúÎæúÌâúÊáúÎæúËâúÊâúÌâúÍåúÎäúÌäúÑæúÐåúÓèúÒéúÍéúÒéúÏéúÎæúÏçúÎçúÎçúÐãúÌãúÈäúÈàúÅàúÃÛú¿Üú¾Úú½Øú½Óú¹Õú¹Ðú¸Òú·Ïú²Îú²Ïú³Ìù¬Èú¯Ë÷µÈö®Èõ²Æô®Åô²Æñ°Ãó®Áð¬ÄîªÁë£¿ê¨½ç¥¾é¦½è©·ä£ºä¤ºæ¢·ã ºâ¢¶â·à¸Ü²àµØ±Ú¯Ô®Õ¯Ô©Ò¬Î¬Î©Ì¦È¦Ë¥È£Å£ÃÁ¼±°{¬§x¥un`~]{oWtnStiIi[IiO?]Q?_ODSMB[M8WO?UIDUIBWKDSM?SK?WK?SKBSK=SQDSKIWQF[UF_SDYO?[KDYQD[OB[QKWWKWYI_YM]YK`S?_[Sgndk±´¨´±µ²¸¢³º¡·º·´´·¡¶» º¹¡¹»¢¸º¡»¾£µ»¸º¸»¡·»¨¸» ¼» ¸º£·¼¡»·»·¡º¸¤º¹£»»¢¹»£¸»¡»¾¥¸¼£º¾»º ¶¼¥º½¡º»£·º¤¸»¥ºº¤¸¹¤»¾¢¸»¤»¾£¸º¡»¹¢¸»¥½º¤»½¦»½£¸½¦¾¸£¼¸£¹¼£¹»£»»¤¸¾¥»¼£º¾£¸»¥½¾ »»¡¹½£·¸£¸»¥º¼£¸»£»»£¸¼¤º¹ º»£¼»¢·»£¼¸ ¸¼¦¸º£··£»¹¢¸·¢··¢¸º º¹ ¹·¡»· ¸¹£¼·¤¸»¢µ»¤¸º£»º¢·»¡¸º ¹¸£¶¹¤·º£º»¢·»£¹»¹» ·¹¡·¸¡¹¸¢¸¼£µ¸ ¸» ¹»¢¸¸ »º º» ·¹¢·»¢¹¼¡¸»¢´·¥·»¢¶· ¹·¡·¸¢¶» ·¶ ´¸¦¶·¤µ·¡¸·¢¸¸¢µ¶³¶¶¸¡µ³µµµ¹¥³µ¡µµ´¸ µ·´·³µ¶¹¡´·¹·¢²¶¡´·µ¶³·µ¶³³¶· ´·²¶µ¶³µ¸¶®³ µµ··µ· ¶³´³³·³µ °³³´¢²µ·³´´³´³µµµµ¶³³³³¯³²° ³´²µ²³³³°³±µ°¯³²²³³³¯°«±°®±´ ®²°³²²¯´²°²²¯²­®¯°²­®°¯±®¯­¯«­­°¬®®®®±®²²¯³±­¬®®°°¬¬­¬­¬®¯°®°®¬­­®²­¬°«¯°¬¬¬¬«®®¬¤ ¡¡¥ £¡¦ ¡   ¢ £ ¡¢¡¤£ ¦¢¦¡¡¥¢¤¢ ¡§ £ £¤ ¡£¢¤£¢¤¢¤§¤¤¢§¡ª¡¦£©¤¥¦¦¢£§¢§¢©§¤¤§¢¨¨¦ ¦ §¤©¦¥§ª¥§¤§£¬¢©¦¥§§¥¦¦§¥¦¥ª¦¬¤¬¥©©¬¨©¥ª¦©¦¦¥¬¤«¨¬¥­¦¬¨¨§¬¨«¦¬¨¨¨®¨¬¨¯ª¬ª©­«§¬«©¨­¨¬«¬©¬§¬©­«¬§°¨¬ª¬¦¯¬®­­«°©®©¯«®¬¬­¬¬®¥¬¬¬¬¯ª±©®¬®¬¯¬¯«°¬¬©±¯°­¯¬±¯®«¯¬®­°­¯¬¯¬°¬®®­¬¯«°¬²¬°¬¯­¯®¯¬°®°¬±®±­­®°¯³­¯¯°®³®¯«¯³¬ª®¬­¬®¨¡ ulYUKwOK`MBbM?[OMYWM[KI]MD]OK[MD[KIYSKUKI[OIUMK]KB]KDYQBYFK]FFWIFWQIYQD[QM[MK]QBUSOYOK[OD_UK[SI_SK`dSdn_irgurzª°ÀÐ­Ù¦¬á¦·á¢·á¦»æª»ä§¹é¬½ï«¼ë¬ÁîªÂñ­Áô¯Ãó¯Æô³Äõ®Çø³Éø¶ÉøµÈú¶Ìú¸Ìú´Íú·Ðú·Ðú¸Ðú¼Òú½Òú½Õú¾Ôú½ÖúÁÕúÃØúÂÛúÂÖúÅÙúÃÚúÆÙúÄÛúÈÝúÈÝúÉßúËáúÊàúÍáúÒãúÓæúØåúÙéúÙçúßîúàìúáðúâðúãòúàóúãóúáôúàöúãóúåöúçöúèøúéúúêùúëúúæùúß÷úÛõúÛñúØôúÕïúÓíúÒïúÓëúÕëúÒëúÒêúÖìúÕèúÕïúÖêú×îúÓìúÓêúÕìúÓìú×ìúÜíúÙñúÜïúÛðúÞòúØðúÖðúØïúÛíúØïú×ìúÓíú×éúÓíúÓèúÑèúËçúÊæúÆâúÂÜúÃÚúÃÞúÁÛú»Ùú¿Öú»Öú·Õú¸ÕúµÐú´Ïú·Ñú³Ë÷´Ìö¶Ìõ¶Èô´Ëó´Èô³Éñ³Êñ±Åî¬Äë¬Àë¬Àé­Àê¬Àêª¿ç©¾é¦¼ç§¿èª½ç¤ºã »á¢·á¢ºÞºÚ´Ú ³Û³×°Õ³Ð¯Ó¬Ó¬Ï«Í«Ê¨Ç§Ã§Á£Â¤»¢µ·±~© wnk|]t[~lUrdWq_IkSKiWMdSFfSI`SM_KMdUFbUO]QI`UF`OM_OK[SF`UOdUQ_WOb]Qb[O`SOdSS_UU`WOd[Qf`Wg_SibWn_Wf[Si[`lokx­¡¹¬³³· ·½¥¹»¦º¾¤¼¸¤½»¦¾»¡¼¾§¼¿©À½¤¾½¦»¾¨½¾¦Á»§¿¼©À¿§Á¿§À¿¤¾¾¤Á¹§¾¾¤º¾¥ÀÀ¥¾À«¾¾§ÁÀ§¿¾«¾¿©Â¾§ÀÁ§¿¿«¿Á¦ÁÁª¾À¨Ã¿ªÁ¾¨»Áª¿Á§ÀÁ¨»Á§¾Á©Á¿¨¾Ã¬½¾¨¿Á­ÁÃ¬À¿¬ÁÁ¬¿ÀªÃ¿©¾Â§ÃÀ¬½À¬Â¿«¿¿¨À¾©À¾«¾¿¦¾Á©¾¿«¿½§¾Â¬¾¾¤¾¿¤»Á¬¼¿§¿¿¥¾À¨½¼§¼½§¾½©»¼§»½§À¾¦½¼§¼¼ª¾»§¾½¥¹»¤¼½§»¼¨¾¾¨¾¾¨»»¥À¼§À¾§½»¨¾¾¤»À§¼¿©¿¾©¿»¦¾»«½»§¾¿¦¿»¨¾¼¨»»©¾»¬»¼©»¾§»»¨¼¼ª½¼¦½¿¦¼½¥»»¨À¼¡»¾¥¼½¦»»¦»¼©½¾ª¼½ª¼»§¿» ¾¾©¼½©»»§½¹¥¼¾¨¹»¤»¼¤¼º¦º»¤ºº¥ºº¥»º¤»»¦»»¥¼»¥¸¹£¼»¥¹»§»¹ »»¨»»¥»¹¤¹»¦»¹¤»»¢»¹¥º·§¹»¤·¹¢·¹¦¹¸£»¼¢»¶¤»¸£¸µ¤·»¥¸»£»·¤¹º¦¸·¥·¹¢ºº¦·¶¤º·¡·¶£¹»¤¼·¤··¥»¸¦·¹¡¹¹¤¶³¤¶·¤»·£¶¶¢º·¡·µ ³´¤µ¶ ¶³¶³¢´µ¢µ³¢¹µ³¶¢··¡¶¸´¶¢¶¶¢¶·¶µ£¶· ·³ ·³ ³²µ³¹³¶µ´³´² ´¶ ¶°¡³±´´²² ³¶¤³°¢¶®µ´¡±³ ³³µ²³¶³±¢³³£³° ³³³²¤³±°°³³¶°¡²°°° °³ ²¯¶¯¯~  ¡ ¢¡  ¡ ¦£¢ ¤¡¡¡¢¢¢ ¢¢  ¢¢¥¡££¡¢¡¢£¥¡¦¤£¤£¥£¤£¤¡¢££ ¢¥¢¤£££¥§¡¡£¤£¥¥¢¤¦¥§¡§¦£¢¤¤¤¨¦ ¤¤¤¦¥¥¦££¨¦¥«¤§§¦§§¥§¨¦¤§¤ª¦¦¦¥¨¨£«§¨©¨¥«¨¬¥©¦ªª¨©¥¨ª¨¨§§¦¨«¨¦©§¬©ª«§ª¬§§ª©¬©©ª©©§ª§®©ª©«©«¨«ªª¬­¨ª©¬ª©ª©¬«¥¯¨ª¬«§«ª¦¬«§« ¤~xrqYYFrM:gD?[I:OD=MF:OK?OIBQD8O??QD=KD8SF:KD5KI8K?8ID5OD=DD:II=ID:QB8IF:IF?SI:OK:QI8QD=IF:QO=QI=IIDOQFQ]I[gQ]tdlqwz©´ÀÎ¡Ø¡ªÜ¬à¡²Ý¥³ä¥µä§·é¥»é¦»é¦ºêª»ì¦¾ì«»î§¿ñ©Âñ¬Àó¬Ãò¬Âø²Çø´Çù¯Èú³Åú³Ìú³ÌúµÉú·ÎúµËú¹ÎúºÌú¹Îú»Îú¾Íú»Óú¾Òú¾Òú¿Óú¼ÖúÂÔúÂÔúÁØúÂØúÅØúÄÛúÈßúÏÝúÍáúÒàúÓáúØæúÙçúÝìúÜêúßîúÚðúÜðúÜðúÝòúÜðúáòúäôúæöúæöúé÷úëöúìùúçùúâùúß÷úÞõúÙöúÖðúÖðúÓëúÐëúÐèúÑìúÎçúÒæú×èúÖëúÔëúÕëúÖíúÕìú×íúÖìúÚîúÚïúÛñúÝîúÞðúÜðúÖñúÙîúÙíúØîúÕéúÕíúÖëúÕèúÓçúÐçúÏçúÎéúÆâúÄÞúÃÝúÀÙúÀÚú½Ùú»Óú·ÒúºÏú·ÐúµÎú´Íø´Î÷´Êõ±Æò°Çò±Æï±Åð¯Âï®Áï«Àì«Áè«Àè¦Àæ¤»ã¦¸â¥ºã¨¸á¡·à¥·â£³ß¢³â ´â³ß³Ü²Û²×®Û¬Õ¬Ó¬Ó§ÏªË¥ÌªÌ©Ë£Ç¡È¢Æ¢Æ Ã¡½»¶¯­{©utkd~YztUugKl_KfQDdM?_O:WOF[I?SMDUKDSFBWI=[K?UD?QM?SK?QMBUODSKFYQDSOD]MFUO?YOB[OKUSIYQBWYOYYO_UK`[K[SI]UMb`Wgtxz¤³¦¬­³°·µ¼£·» ··¸¸£·»¡¸·¡¸¼£¶¹¡¹»¥·»¢¸¾¡»º¢¸½¦º»¹»·¸£º¸£»º·¹µ¼¤¹¸¡»»£¸¸¤¸º¡»¸£¹¼¤¹¸£»¹¤·¼¥½»¤¸½¥¼¼¤¹½£¼º£¹»¢¹½¤º·¹½¥·»¦¹¾¢»º¥º¾¢½¸»¾¥½¾¦º½¢¼¾¸¼¥¹¼¤»¼¢·¾¥µ» ·½¥»» ¹»¢··¢º½¦º»¢»·º»¦¸¿¥¶º¢»»¥¶¼£¸¸¼·¥¹·¢·¹ºº¹¹¢·» ·¹¹»¦·º¸¸´¹¡¶¹ ¹¸£»¼£·¸¤»º£·º¡¹·¢¸··¾»¹ ¹º¡º¹£¶º¥¹¸¡··£··¡¶º»¹¢¸»¸¸¢º»£·º£¶¸¡·¶··¦º»¡º·¡·º¢·¹£¹»¢·¸£¶º¤¹º¢·»¢µ»¡··ºº¢µ¸¥¶¸ ·¸¡¶¸¢·¸¡¸··¶£³···³³¶µ··¡¹¸¢µ¶µ· ¶·¤·¸¢µ¶¡·¸ °¸³µ´·³µ³µ¤µ¸¢µ¸¡·³ ²·²µ¡±¶³·´² ³µ¡³³µ³³³¶¶³´²¹·²³¶²´²³³¸²µ·´²µ±³³³²´³³³µ²²±±³¯°²²³¯°²±²³³²±°­³®­²³°²°°°±®²±± °®°´­²°¯¯¬­­¯®±®­¯¬°­°­¬°¬®°­®¬°²­®³°°®®®®¯¯°°¯­¬®¬²°®¬°¬¬®­§²¬¬¬¬®²­«¬¬ª««§«£££¡ ¢ ¢£  ¡¥£¢¡£ £¤¡¢¡£¢¥§¡¤¤£¤¥ £¨£¤¦£¢¥¤¢ ¢¢¡¦£¦¡¦¤¨§ ¦£¥¨¤¥¡¤¢¨¥§¥£©¨§£¦¢ª¥§¤©£¨¥¤¤¤§¦¨¤¤¡¨§¨¨¨¤ª¡©¥§¦«¤©¦©¤§¦«¥­£¦¦¬£ª§«¥©¨¨¨°¢¬§§¨¬©¬«¦§¬§«§©¨ª¨¬§ª©¬«¨¨¬©¬¨¬¨ª©«¨®©¬¨ª«¬©¬©¨©¬©®¯««®©¬«¬«¯¦®ª°ª­©®¬¯¬¬¬²¬¯­¬®¯¨±¬³«°¨­¬¯¬­­°¬±¬¬¬¯«¬«­®²®°­¯®³­¬­±­°«²¯¯¯°¯¯­°¯³®±­²°°°³­³¬³¬±¯°¬´­³®¯­²¬´±¬®°¬­£®  toS[OqOKiMI`MK]MM[MBWOF]QF]UI[SK_OD[KDYMI[KFYKIYDI[KBWIDUDD[ODUOIUKFWQFSMK]MKWWK[KKYKD[OI]WK[SD]SSY]Kb`Wfndnnzu§°»Ä£Ô¨Ø¤²â¤³â¨¸æ¨»ç¬¾ëª¼ë­½í¨Àï¬ÂîªÁï©Áñ¬Àð¬Ãñ¯Æó®Ã÷³È÷³È÷µÆù³Êú¶ÎúµÉú¶Ðú·ÍúµÌú¹Ìú¼Ðú»Òú¿Îú»Óú½ÒúÁÓú½ÕúÅÕúÁÙúÃØúÅØúËÛúÄÜúÆàúÈÜúËßúÊàúÌâúÒáúÖçúÖåúÙèúßìúàîúäñúàðúáòúâóúáóúäòúçõúçöúèõúìöúîúúïúúïúúòúúñúúóúúïúúëúúëúúäúúáöúàøúÞöúÜòúÜñúÜòúØõúÜòúÞïúÜðúÞòúâòúãñúçôúåôúåôúèöúçöúçúúê÷úéùúçùúàöúãöúáõúãóúÜôúÝòúÚïúÛîúØïúÛðúÙìúÒëúÎéúÉäúÈâúÈÛúÆÞúÃÛúÁÚú¿Öú¾ÖúÀÕú·ÒúºÓúºÐù¶Îö¹Îó³ÍõµÊô·ÇóµÇó³Åï³Æî²Åì®ÂéªÁè®Àä¦¾â¥¼ß«¸á¦»á§¹â¥·ä£µæ§¸ã¤µâ¥¹á¹à ³×³ØµÖ¯Õ±Õ°Ñ¯Ì°Ð­Ð¬Ï¬Ì¬Ð¬ÒªÌ¨È©É§¾£¾¥·³°~¢x{ogx[~o]uiWo]KoYOgYQd[KdMDbWO_OO_SMb[FbSKYSKbSK]QO_QKbUK`UQ_WM_SM`USbWQdUMbSSb[Ob[I`]Ub`[dbYi_Ui_Wi]Qid_lwuµ©³°²¸¼¤µ¼¤»»¤»¾¤º»§½¾¦¼½§ÀÁ¬»¿¨¿½¨½Á¡½¿§¼¾§¾Á¦½½©¿¿©¼À¥½Á¦¿¾¤¿Á©¼¿¬ÁÁªÂ¿§¼¾ªÀ¼§¾½¦¾¿¨¾»¨¾À¨ÀÀ¬Á¿¦½¿¨ÁÀ¨¿ÁªÁ¾¦ÁÀ©¼Á¥¾½©ÀÁ¬ÁÁ§¾Á©Á¿§¿À©ÁÁ©¾¾«¿ÁªÁÁ§ÁÀ©ÁÂ«¿½©ÁÁ¬ÀÀª¼À§Á¾ª¾À©¼»§¼À¨»¾¨¾¼¦½¿¥½À¨Á¾§Á»ªÁ¾¥»¾ª½¼¥¾¾¨º¿©º»¦½¾¨»¿¬»¼¥À¾¤½¼§½º¥À¾¦¾¾ª¾¾¦¿¾¥½¿¨¿»©¿¼¥¾¾©»½¦¾½¨»¿¨»¾§¾¼¨»¿§»»§¾¾§¿¼¦¾½©À¾¨¾»¨º½©º½§»¾¦¼»§¾¼¦¾»§¾¹©º¾¦»¿¬½À¤»½§»½¦»»©¼¿¦¾¼©¾¾¨¼¼¥º½¨½¾¨¾º¤ºº£¹½¦»¿§¹º¦½¹§¹¹¨»»¦¾»¢¹¼¥¹»¤¼º¥º¼¤·»¤»»§»¼§¹½¨»¼§¼½§¼¹§»¾¦ºº¤¹¼¥¹¼¥»»§¹»¡º·¦»¹¥¹¹¦¶¶¤º»¨¹»¤º¼¤»¹¤¸º¥¹·¢·¹¥»· ¶¼¤¹º£¹º¦··¤»¶§¹»£¸¶¤¶· ¶»¥·¹·µ ··¥µ·¨¸µ»·¥·¶ ··¤·· ´º¡·¹º´¡¹³¤¶¶¸¶´¸¡·³·³´µ¦·· ¸³ µ³¤´·£µ´¡¶´¥·´²· ¶¶¥µ·´²·µ µ²·µ³³³³µ³°³´´ ³³¶³´·¡²°³´±³³±³´ ¶µ¢µ²³³¶² ³´ µ³³³ ±±³´¢°³³±³°³±°­°®±{¡    ¡¡¡¡¢£ ¡¢ £¡ ¢£    ¡£¡¤¡ ¡¤¢¢£ ¡¢¢¥¡¡¢¤£¤£¥£¢£¢¥§¥ ¤ ¦ £¢¡¤¤£¡¥£¤§¤¦¢¥¤¦£¤£¢¥£¥§£¤¢¨¢¥¦¦¥¥¢£¡¦¥§§§¨§¥©¤ª¥«¦¤§«¡¨ª©¦©¦«£©¦©¦©¦©«¨§«§©¥¨¨«©©§ª§¤¥ªª¦§¦§«¨«©¬¨©¨¨««¨§¨ª§©«¬¦©«©§««¨¬©««©ªª«­¬©§¬¬©­¨ª®©¬®«©«¬¥¬¦ªª¦¨§~¡|~nw[[ItK=dI:YB5[I5OF=O?5IF:MD=OD:UD:SI?MB5QD5MF=MB:ID:Q=:IF5QD0MD8KI:Q?5OD?IB=OF8QI?SD5MF=SF8QMBOK:SOBQUF[WD`gWbgnq|£¯¾ÁÌ§ÙªÜ¬ß£±á¡³á³å¥¸é§·ê£½ê¥¸é¦»ë£ºê§½í§Áð¬½òªÁó¬¿ñ«Ãó¬Âö°Äö®Ç÷°Æù²Åú³ÈúµÈúµÊúµÊúµÊú¸Èú¶Ëú·Êú»Îú·ÐúºÍúºÐú½ÑúÂÓúÁÓúÃÖúÁÙú¿ÙúÇÕúÄÛúÉÝúÌÜúÒàúÓâúØãúÙåúØèúÜéúÝëúáïúÞðúßðúáòúáôúáöúåóúæôúèöúìúúïúúòúúòúúòúúðúúôúúíúúêúúåúúáúúàöúÝôúÛóúáñúÝòúáïúáðúáôúãôúÜôúãõúäõúäòúã÷úéõúëöúèøúè÷úéöúäöúâöúÛòúãòúáðúÝòúÚðúØîúØíúÕêúÖæúÓæúÔæúÊáúÈãúÅÛúÆÛúÄØúÂÕú¿Öú½Õú¸Ñú»Ðú»Ïø¸Íö¸Ìö·Çó³Çô³Åð®Æî¯Àï°¿ë°Àë«Àæ®»æª»ã¦¸à£¸Ü µÓ³Ò±Ð«Ó¬Û®Ù¬Ú­Þ­Ý±Ú²Ö®Ø°Ñ®Î©Ð¨Ð©ÌªË¦Ë§É¤Ë£Ê£É¦ÎË¤È£ÆÁºµ®§t nlnb{WwlQtfKk]DfSDdM:[QDYK=YK=QIDQOBYK:UO?UD?UD5SF?SOBWQ5UMDQM?SMBYKBUQFUM:YIBWMIUOB[ODYUI][Q__K`YK[YF_SF_ldg¯µ¦³®³¯· µ»¡·¸¸µ´·¢·¸¸¹µ½¶¸¢½¸¸º¢¹»¡»¹¸º¥¹»£¸º¢º½¢¸·¢º¸¡·º¡º»¦»¸£»»¢·¼º»£º»¡»½£»ºº»¤º½£¹¸ »¼¸»¦º¹ ºº¢·º£»»¤»»¢º»£»½¢»»¤»º£¼¼¡º»¤·¾¥º½£»¾¤·¼¤»¾¤»¼¤»º¸»¤·¼¡»»¡¸½£·¹¡¹º¹»¤¶··º »½¥¹º£º»¡¸º¡µ»¡¹¹ ´»¢´¸¢¹¸»¼¢´·¡º» ¸»¡¸¸¡»¹¹¸¡µº¢ººº¸¢¸»¡··£¸¸¥¶º£·¶¡¸»£·¸¡¹·¸¸¶½¦¸»¡¹¼£»·¶»¢»»¢ºº µ»¢¸»¢¸¹ ·º£º»¡·µ¢¸º¶µ¹¶ ·»¡·¸¹¸ ¶·¸º¸¹¢º¸¡´¹»·£¸·¡··¡·· ·¹¡´¸¡µ¶·¸³µ£····´·µ··¶¢¶·¢··²··¸ ·µ¸µ´·£·´¸·¡¶µ³µ·µµ¶³µ·¸µ±±º±´´´µ´¶¶µ³³·´¶µ±´¶³®µ³¡²³°±³µ·³²³¯°±´ ²°³±³³°´­²²³²³²³³µ³µ²²³²°²°²²³±¯±°¯¯®°²²°±²­²²³³°°¬°¯¬±°­¬¯°®­¬±°®±­¬««¯¯¬¬¯±¯­¯®±¯­±±¬®®®°¯®°¬®°±¯¯­®­¯¯±°­®­¬°­¬¬¬­¬­®« ¥ ¤£¢ £¢£  £¡££ £  ¥£¦£¢ ¡¤¡ ¤¡¡¤£ ¦¥¡¦¢¤¥¡ £¦¡¤¥ ¤££ ¥¤¥¤¡¦ ¨£¨¡©¥§¡¤¤¦¢¨£¨¥£¢ª¡¨¦©£¨¤¨§¥£§¥©¡¦§ª¥ª¥¨¤¨¡¨©¦¦«¦¬¥¨§ª§¬¥©¥¦«©¨©¥¨¥©¨¬©«§¨©¯¦«ª¬§¨ª¨©§¨¬¥¬§­¦«ª«¨¬«®¦¨ª¨¥ª¬«¨¯¨¬©«®¬¨­«¬ª­¬®¦¬¬¯«­¬­¬¯¨««°­©«®ª®«°®¬¨­ª®­¬¬®¯¯¬­¬¯¬¯­­¬®©°«­¬²¯¯®°ª­¬±¬¯¬®­°¬­¬±©¬¯¯­±«µ¯²°¯®²®¯±±¯³¬°¯±¯³®¬­±ª¯¯­¬®©¯££z{oiWWMqQIgQB_FB`QF_QI[FFWUI]MKSKFUOFWQF_QMWM?YOFQMIYKB]IBOMF[MI[KFYMI]KFYMIUQB]KF]OM]S?YOF[OF]WOWYFbSM]YQ`gWirilut|«ºÄ Ä¤Ò«Û£­ß µâ¦¸å©»è¨»ëª¾ë¬¾ï¬Âï¬Àî¬Àï©Àð¬Áñ­Ãó¬Ãò°Äô¬Æô¯Åô³Ãø³Æú³Çø·Êù³Èù¹Ìú·Êú·Îú·Ëú·Íú»Îú¹Ïú»Íú¾Îú¾Òú¾ÖúÁÒúÃÖúÃØúÇÙúËÚúÆÜúÈÝúÌßúÍâúÐâúÓãúÖäúØèúÙêúáëúàíúâïúäñúåñúçõúçôúæöúé÷úéøúéøúí÷úîúúñúúöúú÷úúõúúúúúúúúúúúúúúúúúñúúïúúéúúéúúçùúåøúéøúçöúêöúïúúíúúíúúîúúîøúíúúëúúðöúðúúòúúïúúðúúìúúãúúéöúêöúéõúãöúæøúßòúÜòúÝðúØîúØëúØçúÒéúÓêúÊáúÆàúÆÝúÅØúÃÖúÃÕúÁÕú½Øø½Ðú½Ðö¾Ðò¹Ìó¶Éò¹Æï³Éî³Æï·Åë´¿è´Ãç³¿ç°Àã©¼Ù©¹Ö¥´Ó ³Ò°Ï³Ë¬Ð ¬Ñ°Ø³Ø °Ü¢³Ù³Þ®Ú³Õ±Ò®Ò«Ó­Ð­Ì®Ò­Î¬Ð©Í¬Î©Ï«Í«ÊªÎ©Ä¨Ä§¾£¼ ¯¨z¦{ulbu[~qSu_Sl[MnWIgYK_QIdUK`UM`WMbYI_UM_SI`SI`QI[UKbOD`SQ]UK_SI_SO_[K_UQdOM]UMbSKd[Kd_Ub_YifOk_Wi]Ki_Okrkq©º ¬º ¶·£³¼¦»»§º»¡¼¸¤º¼¦¾Á¨¿¾§¼º¦»¾¦¾¿¨¼½¨¾¾§¾¾¥¼¾§¾¿¥À½¥¼À¨»¾¦ÁÀ¨¾¾§½¿©ÁÀ§Á¿§½Á¨ÁÁ¥¾¿¨¿Á¦Ã½¨ÀÁ§½¿«½¼¥ÀÁ¬¿ÂªÀ¿©¾Á§¾À¨½¿©¾À¨¿ÁªÀ¾ªÁ¿¨¼¿©ÀÁª¿Á¬¾¿©»¾§¼Á¬ÀÀ©¾¿ª¼¾¢½»¢»¿¬½¼¤Á¾¦¹Á©¾¼§À»ª»½¦½¼¦ÁÀ¨Á¿¥¾¼¦ÁÁ¦¼À¨¿¼©¿¾¥À¼©¼½¦¾¾¨»½¦¾½ª¾»¨¾½¨»º§¾»¨¼¼¥»¾¥¹½§¾¼¬¹¿«½»¢½»¦»¼¬À¼©ÁÁ¨¾¾¦¼¾¥¼¼©¿¾¬À»¦¾»¨¿¾§»¾¦½½©¼À¨¾½¨½»§¼¼¤¾»§¾¾§½¾¦¼À©½»¦¾½¨½¼¤»º¤¿½¥¹¼¥½»¢¼½£¼¼¦·½¤¾¾¥¼¼£»¼§»»¥»¼§»»¢¹»¥¼º¨¼¼§¼¹£º»¥»¾¤¹º¦¼»¦¸¼§»»¦»½¢ºº¨·¼¦»¸¥¸¼¤¹º¦¼¾§»½¥»¹¢º¸¥½½¨»¸¢»º¡»¹¦¹»¡·¶ ¹»¦º¸¡¸¹¡¸·¤·¹£¸¹¡¼¸¢¶¹·¶¡··¡´¸¦º· ¸· ¶·£µ´£·¹µ·¢¶²¢¹¹¤¹¹¦¹¶¢·¶¸»¦·¶¤¸¹¤¶·£µ· ··¹¶¤¶¹ ¸´ ¶µ¤··¸µ·µ ··¤³¶µµ¡¸µ ´¸¤³· ·µ¡·´¶¶²¶´³²´¢µ¶¡´³´° ³²¡³³·µ±²°³³²³±µ³£³³µ³³²³³´³¡´µ³´·³³³³´³³´³¡¯³³²±³¶¯°¯²µ²±°¡¡ £¡¡¡  ¡¡¡¡ ¢ ¥ ¡¡¢ £¡£¡£¥¢££¢¥ £¡£¡£¥¡¦¡¢¡£¢¥¢¥ ¥£¦¢£¢¦¡©¢¥¡¡¢§ §¢¦¢§¤¥¢£¢¥¨£¥©¡¤£¥¢§¦§¥¢©¦¨¡ ¤«¡¨¨§¥§¥§¨§©©¨ª£¦§¥¢¦¤¦¦¨§©©¨¥¨§ª¤§ª£ªª¥©¥«§¨¦«¤©§©¨¬§ª©«¦¦§«§©¨ª©¯¨«¥«¤­©¬§««­¬¨¨¬ª¨©¬ªª§«¦¬©¬¦­¬ªª­§«©««¬¬¯¬«¦­ª©¦§¤~||glQWBoM?dB8YF?SF8QF5QI=QI5O?5S??QI:MD8UF8SF5I?5QI8OF:KD5S?5MF5OD0OB:QI=MI3SF=KI?QD:OF=QD8MD:QF5QKBMQ=QI=[UD]_QblYilw{|©·¾Ç¡Ë¦Ù¬àµß£µá¢µã£µæ¥¹ê¥ºé¦¸ë¤ºê¦ºìª½í£¹ë¦¾ð©¾ð§¾ð£Àï§½ô­Äô±Áõ®Áõ©Çõ®Å÷°Æõ­Äô¯Ãô°Äô±Æó³Æõ³Å÷·ÊùµÈú¹ÊúºÏúÀÏú¾Ðú¾Ôú¿ÔúÈÖúÆÖúÇÛúÆÛúÌØúÌÜúÒÝúÒàúÔãúÖäúÛãúÚèúÝêúÞíúäíúâñúäñúäòúáòúäòúæöúêõúì÷úîúúïúúðúúì÷úõúúøúúúúúõúúòúúðúúôúúìúúï÷úëúúçùúâöúçóúêôúêöúëúúäøúé÷úê÷úæöúëõúï÷úïùúìúúì÷úêøúè÷úáöúåòúäñúå÷úáòúÝòúàíúÙîúÓéúÔæúÓæúÎãúÐáúÊßúÊÛúÈÖúÂÖúÀÒøÁÐø¿Ì÷¾Ìö¸Ìó»ÆîµÆî¸Âè±Áè°Âæ®¼ã­»Ý®ºÜ¨¸ß®¸Û¦µÚ¥·Ö¨´Ð¢±Í±Ç¬ÆªÂ©Æ¡Á¥Ã¥Ã¡Ë§Ð§Õ¬Õ¬Ó¬Ò§Ò¬Î§Ì¥Í§ÎªÉ§Å¢Ê¥Ë¦Ç§È¦È¦Ê£É¤Å¤Ç¡Ã£½»~³z©w¤nkd]xtWxgIr`DiS?gQ:]K=[O?YI=YI:YK?WM:WIBQK?WI=QD5QOBUK?UK?UQ?SK=WI:YM?UMD_M=_KDWQDWI=[UFY[Q_WI`[I]SI_Q?d]Ukxut®¡¸¬°³´ ±¸·»··¸·¡·»¢¸· ¹¹¡¹¸£º¹¢¸»º¹¡¹¼»¼¡·»·· ·· º½¹» ¸º º»¢·½ ¾»¤»½ ·¾¤»º »¾¡»¸¦º»¡»¼¢¹º£¸½¡·½¢º»£»¼¡»º¡½¾¡º¹ º»£»º¤¹½¢»½¤º»¢»»£¾¾¤¼º¢ºº¤»¾º½¦ºº¢»» º»¤¼º£»½ ¸¹ ·¹£¹»¡»¸¢»»£¸¹½¾¤º¼¸»£¹¹¡¹¼¥¹ºº¹¢º¹£º¸ ¹¸»º£¸¸»¸¢»»£¸º¸·º·¤¸»£º¸¡¸»£·»¡¸µ¶½¡¸»£º»¡½»¤·»µ¹º»¦µº¸·»¹¡¶¼¡ºº ºº¤¶¸¡¸·£·µ¡¹¶¡»·¶»·»¢¸¹¡¼¸¡·»¢»¹¶··¸¡·¸·»»¶¦µ¸¡··¢¸¸ ¸»¦µ´´¹¡·º¡·¸·º¡µº¤¶¶µ¶¡·µ£·¸¸·¸¸£¶´·²¸»¢¶»¸¸¢³··¸···¸µ·¢¸´ ¶·¶´³¶¸´±³³³³´¶³³µ ¶²·· ²³µ¶³³³µ´µ³µ³³³±³µ°±²²´¶´³³µ²²±³ ´³´³°´³²µ³°°°±´°´µ²°²²±µ²°¯±µ¯°°²²²µ±³²²µ³®²²®¯²²®®®°®®±­¬®®°ª­²°¬®­¯°°²µ¯¯¯²¯¯±®±²¬®®°¯®®¬°¯¯«¬®®®®­®®¬¯¬®¬°«²°ª£¢  ¡¥¦ ¡¢£¢ £¢¡ ¤¡ ¢   £¢¤ ¥¢££¡ ¤¢ ¡¥¤¢¡¥¥ ¡¤£ ¡ § ¥¢¤¢¤¤¢¢¤§¤ ¥ ¥¤¢ ¦£§¢¥¡§¢¤¤«¥¢¥«§££¦ «¤¥§§¡ª¦¤¦¥£¨¥¦¦§¤«¥¨¦§¤©£¥¦ª§©¤ª¦¤¦¬¤§¥¨¢¬¨©¥§©¬¦¨¥¬§«¨«¨©¥«¨¬¤¨§ªª§¨¬«¬¨¬¦¬§¬¦¨©®¨§§¬¬¯§«©¬©®«¬¬¬ª®¬«ª¬ª¬¬­§©ª¬©«ª®¬®«¬ª¬ª®¬®¬®¬¬¬®©¬­¬¬¯ª®­°©°¬®®¯­±ª¯ª°¬®®±¬®®²¬¯°°ª³¬¬¯¬°´®²¯­¬®¬²­®®®¬²°°®³­²®±­±¬±®¯©±¬²¦¬¥{|inW`MqQBgII_QI]KK[MF[UKUUI]QB[OFWMK[K?WQD]QDSIBWKB[KBUM?]QDWOKWM?]OISMK]QB[MF[YK_MKUKD[KFYOB]OK_[KUUKbQM_[Odn[kxitxz¥¯ºÇ¥Ë¬× ®ß¦¶æ¦ºä©¸é¨ºê«¿í¬¾íª½ïªÀí©¿ìª¿ïªÁí¬Àî¬Áð¬Âó°Äô®Åô²Âò¯Æö²Åõ¯Åö²È÷´Äô¯Æò¯ÃôµÆð²Ãî²Ãò¶ÅõºÆô¹ÊöºÈù¿Îú¿ÑúÁÐúÃÑúÆÕúÇÕúÉÕúÌÖúÉàúÎØúÐÜúÒàúØàúÝâú×êúÝçúãéúßìúáïúçñúçñúäôúçòúæõúçöúëõúîøúïøúí÷úïùúïúúïúúí÷úôúúõúúúúúñúúöúúôúúóúúóúúôúúðúúìúúçùúëõúð÷úò÷úñúúìúúìøúëøúí÷úïöúðøúðúúíúúí÷úñúúíùúæøúèóúíôúç÷úâôúäóúÞïúÙïúÚîúØìúÛîúÖçúÓãúÐàúÊÝúËØúÃÕøÃÒôÃÊï¿Ìò½Êî»Æë¶Âè³Áà·Áá°½Ý®¾Ý¬¹Ù«·Ø«·×¬³×®³Ú¤µÓ¥¶Ì¯Ê ²Æ®Å«Á¦¿¦º£¹¦¾¢»£À¤Î¥Î¬Ò«Ð®Ð¬ÎªÏ¬Î©Ñ¬Ë¬Ê§ÌªÌ§ÊªÊ¨Í©Ì¨ÎªÌ©Ì¨Ì©Éª¿©Á¤¼±«x rtkbrS|gOr_OlUKg[KbOKdSFbOIbWI]WK_OM_SK_OF`OK_WM]SI`WO]_M`SO]OM_WM_[MdWQ_WK`[UbUMd]Mb_Yf]WkdQiWOgYQk_[nqou«¡·¡¬µ¡·¸¢³½¤¶¾¦»»£¼¼ª»»¥½¾£»¾¨À»¦½¼¦¿À¦½¿§¿¼§¾¾£»¼¤¾¿¢¿»§¼¿§¾¿¥ÁÂ¥»Á¤¿½§½À«¿¿¨½À«ÀÁ©¿À¦¿¾©À¾§½Á©¿¿«ÁÀªÀÁ«¾¾¥½Â§ÁÃ¬¿¿¨Áº¦Á½«ÀÁ«¿Á§¿¿©¿À§Á»«À¿ª¾¿¦½¾©ÁÀ¨¼Á¬½Á§¿¾¦¿¿¬½¾¨¿½¦¿Á¨»¾¨ÁÀ¥½»§¼Àª¿¾ªÂ¾©¼½§¾¾§ÂÁ¬¾¾¦¼Á¥¿º¥»¾§¿¼¦¾½¦»¼¥º¿¥¿½¦¼¼¨½½¢»½¥¾¾©¼½¦¼¿¤¾¾¤¾»¤¾¼¦¸¿¨»Á§¾¾¨¾¼ª½½¨½¼¨¾¿§½»¥¼¿£¾½«»¼¦½¿¦¼Á¥½¾©¾¾©»»¨½¿§¼»£½¼¥¼¿ª¼¾¦¾»§»¼¥»½¦¼·¤»¿ª¼¾¤¼¾¦»¿¥»¾¦»»§½»¦»»©¼¼¢¿½©»¾¦»·¥½¼¥»»¥ºº¤»»¥¼¾¨»»¦¹¼¦º¼«º¹¤»¼¢ºº¦µ» ½¹¥»¾§¼·£ºº ·¹¤»·£·½£»º¤»¸£º·£¹»¡´»£ºº¹·¡¹·£··¥º¹¡¼¸¡·»£»¸¡¶º¦··º¸¤º·¤·¹£¹·¢·¹¤·¸¢·µ¡·¸ ¹¸¡·¹¢¹·¢´·¶³µ·¤·¶¤·· ·µ¢·¸¡·³µ³¸¶¡»³ ·¶¡¸·¢·³·¶¡¶¶¡¶· ¶³³· ³·¡·³¹µµ³µ³·³¹³³±´´¡´¯¡²²¶³³°³±µ³´³°³³³ ´³³³¢¶²³³¢³²³³¡³³´¯³³´²¯´´³µ±²³µ³³¯°²±±³­²³° ~ ¡ ¢¡ ¢¡¡¢ ¢ ¢¢¢¥£¢¢¡¡¡¦¡¡¢¡¢¥¡¥£¡¢¡¡¦ ¢¡¥¡¦¢¤¢¥¡§££¡§¢¡ ¥¢¥££¡¤ ¢¡§¢£¡§ §¡££¦¡§£¥¤¦¥§£¥¡§¡©¦§£¥§¤¦¥¦¤¤§¥¦§¦¦¦¡§¥¦§©¥©¥¥§©¡«¦¥¤®ª©¥©©ª¥«¥©§«¨¨©ª¨¨¨ª§¬©©§©¦­¨ªª§ª¬§©¨«©«¬«©«ª¬¨¬ª©¨¬¨¬¬¬©«§¬««¨¬ª¬©ªª¬ª«««««¨«¬«¬®©¬§©¬«¢ª¡rdz]_KwM:fI=_F:[I=SM?SD?QD8UM?QI5S?8QD=ID8KB5SK:O?0MB=SF5ID5OB8QF5MI?SF0OI?QK:UI8QF:QI:QD3QD:QI?MO?SO=SI?QQ?[WI]kYbubilz£±ºÌ£Ï¦Ù«Ù¢°â£·á¶æ¡·æ£¸å¤¸è¤¹ë£»ê¡¼é¥»ë£»ê¡½ê¡ºí¦ºí¡»í©¼ì¬»ï«¾ï©¾ð®¾ï¬¾íª¾éª½æ§¹âª¸â©»ã­¸ä«½å°½è´¿ðµ¿õ·Ãö·Æõ¾Ê÷¾Êù¾ÈöÃÎúÅÎúÄÒúÃÑúÇÑúÏÖúÒÛúÓÛúØßú×áú×àúÛáúÜãúàæúàëúßêúàíúáìúâîúâîúãîúäðúâóúäòúãïúàñúáðúãñúçôúêôúíöúéöúæöúëóúëöúíöúæõúèõúàòúàïúãðúèñúíôúêöúçõúâôúåôúáîúåôúåòúäðúäðúãîúæïúâîúßðúàìúâïúßìúÝìúÜìúÜêúÚëúÓåúÖâúÑâúÐáúÌÛúÆÓö¾Ïó½Ëê·Äã´Ââ³¾Ý®¾Ô¬¸Ô©·Ö§µÙ¦³Õ£°Ò¥²Ì­È­Ä§Æ§Ã§Ç¡§ÈªÊ§Æ«¾¥®¡³·®­¬¬¶·µÃÇÆ¡Æ¥È¤Ç¢Ê¤Ì¤É§Ç¤ÆÇ£È¤Ç£Ê£È§È¤È¤È¤Ä¢Ä£Ã º·~­w¦tkibYoOrbDkYDgU?dI?_Q8WO=YF:QI?[MDYO:UK?WO?YF?YFBWM?UKBUQ8[IDWK?WMDUUFWKD[M:WOFSUD[S?[UI]WKb]B]YI[SD`]Igggi¤³¥³°³²¸µ¸¶¸º¶·º¡·ºº»¢¹»£¹º¡»»¹»£»¹»¹¡»¼¡¸»¹¹»¹¢¹½»»¡¹»£º½£¾º¢»½º½¤¼¼¥º¼¤·»£»»£»¿»»¤»»¢¸»£¸¼¤¸¸¡¸» »¾§»º¦¹¾½¾¤¹»¢»»¤¼¾ »»¥¸¾¡½½£º¾¤ºº¢»» ½»»»£»»¢¹» »¸¡»»¡º»¥»»»»¡¸»¢¸¹¼¼¢¼¾¢¹¸¢¼º¡º»£»¹º¹¶»£º¼¥¸· »½£¹·¡¸¼»»¡¸¸¢·¹¡·º¡º¸¸¸£»¹£¹º·¸ »»¡¸¸¢¶»¹·¸¸£·º¡º»·¹¤¶¹·¹¸» ¹½¹· º¼·»¢ºº ·¸¹¹¢¸µ¸¸¡ºº¢µ¸¹¸¹¹£¶¸¢¸· ¸·¡·¹··¡µ»£¸»¸¸¡¶»¡·º¸¸¡·¹µº´¸¸¸¡·¹¡¶·¢¶·¡·µ·¶´µ¶µ ·³ ··¡¶··µµ´ µºµµ¶³·»¡¶¹³µ³³³¶·µ³µ °´µ·µ¶ ²·³²³¶¶´²´·³¶³²·³´³·³´´µ³²¯²³µ´·²²µ´²´µ´³²³³±³³¯²³³±²°µ³°°²±°¯±³°³±³±²²³´°³®°²³³°²¯²®¬³®®¯®®®°¯®­¬²¯¬­°®²®¬®°­®±¬®°¬­°®°¬«²®­®®°®°­°¬®¯®¬¬«°¬¬±¬¬®¯ª¬¯« ¢ ¢¡ ¢¥¡ ¢ ¤ ¢¥ ¤¤ ¡¤ £ £¤ ¢ ¤¤¢¥£¥¡£¤¥¤ ¢££¢¥¤¢¥¡££¤¡§¢§ ¤¥¤£§¤¦¡¡¢¤¡¨¥¦¡¦£¤£¤£¤¤¦¥¦§§§§¦ §¦¥¥©¥§¢©§©©¬¤©§¬¦¦¤¦¦¨ªª§¬§¨¦¦¨¬§©¥©¦©§¬¦§¦¨§«¥¬§«¥ª©¨©ª«¬§¬¨«§¬¨©¨¬©­©«¨¬©«¤«ª¬§¬ª­ª©ª¯¨¬¨­§«ª¬©ª¨¬§®ª¬©¯«¬¬¯«®§³¬®©¬¬°¬­¬®­­ª±­¬¬¯¨°¯¯«¯¬¬¬¬¯¯¯®¬®­¬ª¬®ªª¬¬°¬±­°¨­«±®±¬­¯®®°¯±²±¬±¬³®³°¬¬±®²­¬¬°¢§¢ |l~dbMzOFlOF_MDdKF]OMWMIWOBWSM[KFYKF[OIYKBWKB[KKUK?WMKYQDUMFWMD[OIUOI]OB[OKUOI]OBWOISKK]KBUMIYSMYUD]QM_UK]]MdbSdtbooz{~¨·Ã¢Ó¨Ö¤¬à¢¶â¥¸ç¨·ç¥ºç¨»é«»ê§Âëª¾ï¬¾ï§Áîª»ì©¾í§Áî§ÀîªÁï¨¿ð¬Áð°Ãð¯Áò®Áï®Ãì­½á¦»Û¦»Ö¨·Ø¥´Ù¥µØ«¶Ú­¹ã¯µæ´»ê»¾î»Âï»Èð¾Æï¿Äï¿ÇïÁÆõÆËúÈÌúÉÎúÌÑúÏÕúÐÓúØÕúÙØú×ÛúÙÜúÝÜúÞÝúÚãúââúãêúäëúãìúâíúàîúàîúäðúàïúâïúâïúÝïúÝíúÞêúâíúçïúèïúèóúâñúäñúâòúáðúßðúÚðúÖïúÝðúäðúçñúèóúêôúæòúàðúÞðúáðúâðúÞïúÛîúßîúàïúÜîúÝïúÛìúÛìúÜëúàéúßêúÜìúÝëúÜçúÕãúØâúÑÛúÊØúÆÔôÀÎíºÆäµÃá¯ÀÚª»Ö¥³Ê§±Ê¢­Ã¢¨¾¡§Á¡¨É¢ªÈ¡ªÃ¨º¤º »´¡¹»¡¾¤Á¢·¢³¡¯ª¨§ª¥§µ¶·ÃÅ¡Â£Æ¤Æ¤Ê¤Ê¡Ç¦Ê¨É¤Ê¨Ê§Ê©Ì¨ÌªÎ¨Ì©Í¨É¨È¥Æ¤¿¤¿£³|¬~wqli|U|nUx`Mo[KkWMf[I`QF[QD]SK[WObYF_OI_[M[QK`SK`WK[QD]SK`QO_UD]SO[YM`SQiQMdWW_]S`]M`YUb[Wf[WfbQb[OiYWkkln·¡¥¸±¶¤¸¼¥¶À¥»½¡¿º¡»¾£»»ª»¿§½À¦¾¿©¿¾¤»À«¿¾¥¼¼§½Á¥À¾©Á¾§½¾¤½¾ª¾Á¨¿Á©»À¨¾»¨ÀÀ©¿Á§À¿§¿¿¨¿Àª¾À£Á¾¥½Á¬¿¼§ÃÀ§ÁÁ¨º¿§Â¾©½À©Á½«ÁÀ¤Á¿«¿¿©½¼§½Á¨ÀÁ§½¿©¾¾§»Á«¼¿¦Â½¬¾¾¬¾À©À¾¨¾¿§»º©¾¿«¼¾¨¿À¨Â½¤½¿¨À¿¦Â¼ª¹Á§½Àª¾À¨½½ª»»¥¾¿¨½¿§¹ÀªÀ»¥½¾¥¼¿©º½§»½ª½¾¦¼¾¤½¿¨»¾§»¼¤Á¾¥¿À§¾»©¿¾¨¼¿ª¾¼¦¿¿©»À§¼¿©½Á¥½½¥½»§¼Á¦»¼§¼Á©Á¼¨¾Á¬½½¦»¾¦»¾¨¾»§½¼¥½»§½¼¨¼¾¦»»£»»¥¹»¦¾½ª½º§»»¤¸»¦À¾ªº»§½º§»¾¨»¾¤½º¢º¾¦½¼¡¼¼¦¼¼¨¼»§º¸¡º»§»·¢º¸¦»º¥¼»¢»º¢¹¼¥»¹¤º»§º¸¤·»¤º¹£·½¥¹º§¸º¡·º¤·»¢¸¶§·¶£º»¤¹¼¢¸º£··¡¸¸¡º¸¡º¸¤º·£·»¡»»¦¸¹¥¸¶£»¹¡¸¶¤¸·¢»¹·º¡´·º¶¤¹¸¢·µ¢¹¹¦¸· ¶³£·¸¡µ· ·´¢µµ ·µ¢³·¤·µ¢·µµ· µ¶ ´µ¢³·£·¶ ¶· ·³µ³¡¶µ¢¶³ ¶¶µ³¹µµ¶µ± ±³ ³³³³µ¶±¯³³¶± ²¯±±³±¡±±³³¶±²µµ²³®°³´°´´¢´³´°®³³µ³­¶³³²°³ ³¯±°´± ±±µ¬³~|¡     ¡¢¡¡¡¡¡£ ¢£¡¡§£¤¥£¡¢¡¡¡¡¦¥¢¤¡©¤¤££¥£££¡¤¡££ ¡¢¡¤£§ ¦¤¥¢¥¦¥£¥¥§¢¥£§¤£¥¤¥¡¤§¢§¥£¢¦£¨¥¥¤¦§£§¤§§©¥§¥§£§¤§§§§§¤©£§¡¨©«¨¨¤¥£©ª©£§§«£§©©§ª©«¨¬§«©¬ª«¤¬¦§©©§«©«©¬¥«¥«§«©«¦¬ª«§©¨©©¬«¬§¬ª©«§¨©©­¬«««§«ª­©¬«­ª®«­ª­¬¬®¬¨©§§§on|`iQzUDlI5dM=YI=WI0UF?QB=OB3SB=QB5MB8QD=QD=M?5MB=SD5KB5OB8OF=OF:UD=Q?:QM5OD8SI:OF:Q?5II8SB?QI3MD:UK:SI:YM:]UM[[O`q]kdot¨|¸ÈÔ¨Ø¬ß±Ü ³â¡µä¡·å¥¶ç¢·å¥¾æ¡¾é¤ºë¥¾ê¤»è£½æ»é ¹é£ºé£ºè£»ë¨ºè¦ºæ¤»â£¶Ù³Ï²ÉªÈ«Ã¨É¨Ð©Î¢«Ë¤¬Ø«±ß¬µß­¸â³¸ä²»Þ²¹Ý²»æ¶»å·¾èµ¿å¾Âæ¾ÁìÁÄïÅÁóÈÅöÊÈöÄÌõÉÌ÷ÌÈúÒÒúÔÒúÖÔúÛØúÚàúÛâúÛáúÖãúÖâúÖâúÕáúÓãúØçúÎäúÌäúÐÝúÓåúÓæúÖäúÛäúØçúÙèúÖèúÓëúÎèúÒêúÕäúÖéúØæúÙëúÛçúÓèúÐèúÖèúØæú×êúÎæúÒçúÌäúÌâúÐáúÒãúÐãúÎãúÏãúÒàúÐÝúÓßúÒÜúÒÜúÐÛúÈÔøÄÒó¾Èä¶ÃÙ°¾Ó«¶Ê¤²¾«À£·¥­¥¢£ ¢|£¤ª®¦|u|zzz¡w| ¨¬®·¶¹»¾ÂÆ¡Ç Á¢ÃÇÇÈ¤Ê¤É¦Ê¥Ç¢Ã¢ÅÃ£½¼³~©t¢ndf[~|Y|lKq]DiW?iM?`I=[K:WK:SM?UQ=QO:YF8WSBYK?]K?WMBWFBWI?UM?QM?QQ:YK?USBWF?WUFWUDYOD]QFUUIYQI`_IbUFbQMb_Ukxgq­¶«·³ºµ¼·º»¸·· ¸º¡ºº¢º»¡»¾¥»¸¢»½¢º»¢½»º»¡ºº ¹»»»£»½¡½»¸»¡»º¤¹»¢¹º»¾£·¾£º·¿»£»»»»¢º¾£»½£»¾¡»¼¤½»¦»º¡»»¦¾¾¦»»¡À¼¤»»¤·º»»»¿¡¾½¢½½£¹¾£¹»¥¸»¢¼¾¤¸º¤¼º¼» ¹º¢¸»¥¸»¢¹º º¼£¾º¸¼£º»¼»»½£»»£¹¸¡¹º¡¹¼ ··¢¸½¡»¹ ¹»¸» »¹¤»¼¢¸¹¡º» ¹¸º¸£¸¶£»»¡¹¸¡·¹¥ºº£»¸¹¸ ·¸¸´¢¹¸·»º¸¡·¹··¡¹¼¡·º ¹¹ ·¸¶½£¸½¸· ¹»¡º»£¸¸¸»¸¸ ¹··¸¢¶·¸¸ ¸¸´º¡µ¸¸·¢·º£¸·¡¸·µ· ¹µ¢·¸ ³µ¸¶º´¶µ¡µ··´³¶¶¸»µ¢µ·µ´¡¶¶····´·µ· ¶·¡·¶¶´£´¹·´³´³·´·¶²µµ²²³·¶·²²³³··±µ³´´µ³µµ°²²³³²µµ°³´³²²·³²³±¶³µ²³³·¯µ³®°µ¯¶²°´²³³±°²°²²°³²²²³²²°²²²¯®³³³±²²±°°²¬°³°±°­±³°°°®®¯­®°®°®­±¯­¯°¬¬®¬°°¬°®­­¬­°¯­²¬®¯°«¬±°¬­®­­®¯­«®«« ¡£¡¡¡¡ £¢  ¡¤ ¡¡ ¡¢£¤ ¡¢¥¤ ¢¡¡¡¢¤¥¡£  §¤¡¡¡¤¡ ¤¤¦¢¤¤§ ¦¤£©¢¥¤¦¥¦§§¦¥¡¦¡¤¥¥£¥¥¥§ª¤ª£¨¨¨¢§§§¨¦¥¦¨§§¥§©¦©©¦¤¦¦ª§¨¨¨§§¥¦ª¦¤¨¦©«¨¤«§§§§§§¥¨ª¦©©§¨«¬¨©©©¦§¦¦¨¬©¬¬§®©¬¨¨¬¨ª§©ª©¬«¬©¬¬¨¬«¨ª¬«¬«¦©¬¬¬©¬­¬­¨¬¬¬«¬®°¬¬­¨¬®­±¬ª®«¬¬¬­¬«¬ª®«¬­¬ª®­¬«¯¬°°®¬°³¬±²¯¯©¯­­®²¬®¬®®°¬¯­¯³¯¬°±±®®«®°²°°®±°¯®¯­±±°±¯±±®²³±³®®­¦« ª |qrblU{YMoUBdWK[OI[MI]SMUQIYOB[QISQDYKBWOFSMDYKI[MK[ODUKBUKDUQMYUD[OK]UKWQIYOB[QFUQD]MF]UIQQK[S?WQM[YF_SF`bI``U`k[ffqo| ~³ÃÐ§Ø¢¯á¦³ã¤ºç¨¸è§½ê©»í¨ºí¬»ì¨¾í«Áð¨Áï¦½ï§Áï¨¼í¬¿í¥¿é£»ì¨¼ëª¼ê§¼æ¨»à¤·Õ¶Ð¬Í¬Ã¨À©À£¿¤Á¥Æ©É¢¬Î¨­Ò­³Ù¬³ß®³Õ§¶Ò©´Ð¨³Î°³Ò°³Ú´³×´¶Õ´´×µ´ÝºµØ·¹Ó»¹Ø·¸Ø¸¹á¿»éÂ½éÇÅïËÈòÒËúÕÌúØÒúÖØúÕÙúÔßúÒÞúÕßúÓáúÐáúÊáúÊàúÎÝúÎßúËâúÑßúÓäúØãúÖèúÓçúÕçúÓèúÔçúÒèúØêúØëúÖêúÓëúÓêúÑèúÑçúÐäúÒèúÐæúÎâúÍäúÎãúÍâúÐâúËáúËßúÏßúËÙúÍÚúËÚ÷ÈÕöÆÓôÂÍî¼ÈåµÈÙª¾È£´»®µ¦¤¡xz{xxwtzrtuzx¡¢~zqx{|¢©¯¨±²µ·¼ÄÆÆ È¢É§É¤Ë¡Ë¤ÎªÍ§Î¨Î©Ì¥Æ Ç¤Ä¨¿½±|©w¡qni`zYwnQt]Mq[FkUFbUM_SD`QFW]M]WM`WM]]I]QIbQF[UM[UF_YD_UKUUIdWF_SQ_[K_[Mb[Qb`QdUQf_Q]YM_[MbfSgbOd]QbdQgtiu¬ ½¢®· µ¿¦»¿§¾Á¦Àº£¼¾¤ºÀ§¾¿ª¾Ã¥»Ã¥»¿¦ÀÁ§ºÁ¨¼½¦¾À¤¾Á§½Á¥¾¾ª»À¨¼Á§½½¥»½ª¼¿¦¾Á¦ÀÀ§»¿ª¿À§¾Á§ÀÀ¨½Â©ÀÂª¿Ã®»Àª¿Â§ÁÁ¨¿Á©¾¾©»Á«½¿«ÁÃ¬¾Á§¾À¨ÀÃ¨ÁÁ­À¾§¿À¦¼Áª¿Ã©ÀÁ¨ÁÀ¬¿Á©¿¿«ÁÀ¥À¿¨¾À«½¾¦»¿¨¿½©¿¾§»Á§½½£¾Áª¾À¨ÀÁ©À¿©½¿§»Á¤¿¿¨¿Á©»¾¨¼¿¨½¾©¿½§½Àª¼¾ª½À¨¿¾¦½¼§¾¿§½½¤¾¿§»Â©½»¦À½ª¼¾©ºÀ§¿À¥¾¾«¾¾ª¼¾¨»Â¦¼À§¼¿ª»¾ª¾Á¤¾Á£¾¿©»»¦¹»£¾Á©»½¨½¿§»Á¦»¾¦¼¾§ºÀ¨º¿§½Á¨¾¿§»½©»¼¦»½¥»¼¥»½¤¼½¦º¾£¼¿¥¼¾©¼¼§»» »»¥º»¥»½¦¹º©¶¼£»»£¹º§»¼¦»»£¸º£½¼¦¼»¡¸º »º¥·¼¦¹»§¹¼¥º»¢¸½£·¹¡·¹¥º»¡¹»¥º¼¦ºº¢·¸¡¶»¢·º¥»º¡¹¹¤¶»¤¸¹¡·º¤¶º¤¶º¶¸¤¸µ··£µ¹¥µ»¥¹¹£¶¹¤·· ¹¸¥¹· µ¹´¶·¹£¶º¡·¹¢´¶¡·¹¡³·¶¶¢´·¢³·¡¶·µ´´·£³· ¸¸¡µ¶´µ µ¸¢³¶ µ³µ¶³³¢´±³¶´·³·µ³³· ³¶³³±´³´³³±¶¡°·±³³³³³¡´µ ³µ¡°³ ³µ²µ±µ±±³¶°³³³²µ±²´³¯³°·³°³²³ ¡ ¡ ¡ ¡¡ ¡¢¡§ ¡£¤¤ ¢£¡¡¢¤§£ £¤¡¤ ¨ £££¤¡¦¡§££¡£§¡¨¦ £§¢¤£¢¦§§§£©¡¥£§¢¨¦¥£§¢¨ §£§¡§¥©¢§¦£©§¦¡¬¤¥£¤¥ª¢§¤¨¦«£ª£¦¤©¤¨©¥¤©¤©§¨¦©¡­£«¤¬¨ª¦ª¨¬¦¬§ª¦¬¦¬¦«¨ª¥¬§®ªª§¬ª©¥¬¨¬¥¬§¦©©§°§¬©¬¥¬§¨©¬§®§§§­«­¤«©ª«­¬¬§­«¯¥ªª«©­§²­ª¬¬¨¬ ¦¢tkdoY_FtM=dF8_I:YD?SF:YD5OD=SF8WD:SB8Q?5S=5S??MD?S?5QB=QD5S?5UI5QD?QF3SF:QI=SF5UB:OF=UD8U?:QI5SD:UO=QI?UK:WMB_YK_kOi{_rg|¦z·ÈÐ§Ù®Þ®Þ°ä¶ã¢·é§¹ã§¸è§»ç¢»é¤ºê¢¼é£½é£»ç¡»èºã·æ¸á¸áµà ³Ü°Ó°Ê­À¤´¡®µ³­­°»¡»¤¿¥Æ¥Æ©º¢µ§»¤½¡¿¤¾¥¼¦²¤¯¯¬¯¬¬´£¸£¢Â¦§Îª°Ø³´â¾¸ë¾ÁñÄÀóÄÉ÷ÄÊúÄÐúÆÑúÃÒú¾Óú¿Õú¾ÒúÂÒúÆÓúÂØúÅÙúÈÚúÉÜúÌÞúÈÜúÎàúÌáúÏãúÏáúÎãúÏâúÏâúÌåúÇßúÇàúÇàúÉàúÄàúÂàúÁÙúÃÙúÆÝúÆÛúÆÛúÁÙú»Õú»Ö÷»Ðê¹ÌçµÆè²Äß®ÁÛ©¾Ð·Á°¯«¡|rqnggb`|xd{`xb{f|ubw]z|`|z`z{]|{`||f|~n~t|nirwlgkbnnux¢|£|x z¡~«µ¾¾¾¡ÃÈ¡Ã£Ç¢Ç¦Ê¤Ç¥È§Ä¥Ã¢Ã£Á¼ º±u£rid[|WztUwfDn[?fS?gK:_K=_K?YK=]Q=WMBYMD]M?]I:YI=YI=UK=UI?YIBWIBWK?QQ=WKD[M:[MDWQF]OK`KB[Q=_QI]YIdSDdYI_UIf__ntx° ²¡®¼µº·»·¶¹¹º»£¹¹ ¼º¡»¼¸»¡¸» »Á»¼£¼¸»¼£»·¢»¶»»¸º »º»¼·¹¡»º¢º¾ »¼£»»»»£º¸¡¹»¢¼»»½¤º½¡½º¤¼½¢ºº¡¹» º»¡»º¡»º¤½»¢½¾¢»»¢¹½¡½»£»¹ ¿º£¸»¦º½»» ¸»£»¸º»ºº¡¹º£¼»¡º» »·¡»º¡½»¡·¾¡»»º¹£»º¥»½··¡¹» »¼ »¼ »º »»»¸£¹¾¢¸º¹º »¸¹»¢»½£»¼¥º¹¡¼»¥¹½£º¹ ¸ºº½¢»»»»¢¹º¹»¤º· ¹½£»¸¡¸·¸»¡¸¹¡¹·§¹¸º¸¡¸¸·´¸»¢¹¹¸»¸» µ·¡º¹¡º·º¹»º·¸¢·¹¦¶º¹»¡¹¹¡µ¸ ¹»¢¸¹ ··¸·¡··¡·· ·¶³··µ·µ³· ¶¶·µ·´¡µµ·³·´³¶¡¸µ···³ ³¶´·£¶¶·µ¸µ¶°µ³´³µ¶·µ´µ¶µ³³¸³³³´³´¶º³´²³³²²´²¶²³µ²³µ²´µ¶´³³²³³²³²µ±³³±³²¯²²³³²°³¯´²±´´±³¯³³´²®±²³³³²²²²±²°²®®®­²®²®²®®­°¬±¯®­±°³¬«°­ª¯­²°¬¯¯¬±«¯®®­°¯­­®®¬°¯«¬©¬¬ª­°¬­­¬¬«ª° ¡    ¡   ¡¢¥  ¤ £¡¡¢  ¢¤¡¢ ¤ ¢¡¥¤£¢¡££¤¡£¢¦£¦¡¢¤¥¤£ ¦¡¤¢¢£§¤£¤£ ¦¥¡£¢ ¢¥¥¤£¥§¡¤¨¥¥¥§¢¥¤¤¥¥©¦¨¢¦¥¨¥¨¦¦¤¨§ª¦©¥¤¦¨§¨¥«§¨¦¤¥ª¨¦©©¦¬ªª«¨§«¦¨¨§¦©¦«ª¨ª¬§¬§¥©¨¨«¬¬¨¬©¬¬¬ª¬§©¨«¨¬¨¬©¬«¨¨®«¬¯¨«¬¨ªªª§­ª­¬¬¬¨ª¬ª«©­¦¯¬©§©«­«®­°¬«­°­®¬¯­­­««¯ª¬°°±¯¬®¬¬­°«®¬­¯­®¯®¬±­ª¯¯¯±­®®¬¬®­­³¯¬­°­³¯¯®¯­³­®¯¯³³¯®®°¯±°°¯®¯°­¯¤«¡¢| rnu]dSqUKgSDkUK`QI]SF]MBYSKWMF]QBWQKYMF`OFSWIWSDSQ?SQFYQK[KKYWF[SK[O?[OMSSM]OD]QKWMBWKBUQF[WK[YI]YF[WO`]K``Q_n]b{]roz£{·ÁÍ¥Ú «Þ¢³á¤³è¥¶ë¨ºê¬¼í«¾î¬¿ñ¬Àð¬¿í©½ï¬Áï¨Áí§Àë©¾ì¦¼ê¥¹â ¶à£¸ÙµÙ°Ê±Ç¦¾§´¤µ­ ³©¯­µº¹»²¡° ­²¦¬¨£||~¥©¬¼¢ Êª©Ø¬³Û³´åº¾ßº¼ì»¾ð¾ÆøÁËú¾Ì÷»Êú½ÎúÁÐúÆÒúÃÖúÄÕúÉÙúÆÙúÌßúÌÜúÐàúÑàúÒãúÒäúÒçúÍæúÌæúÈæúÊâúÊãúÉàúËãúÌàúÅáúÂÝúÄÜúÆÛúÈÞúÆÛúÀÖúÁÕù¹Ðë±Êä¬Èß«¾×§¾Í¤¹Ç²·¬­£zxuqooloibg|iwbz~l{{f~b|{k~lkg|{kglrkt~utxoonu ¢ ~xz|¢©¸¿Æ ÇÈ£È¥Í¦Ë¨Í©Ì§Ë§È§Ç¦Ê¥Æ¤Ä¡¿¡º °~©xrkf{_rSxdQn_MkSIbWKdSM]WD[_M_]M`[K]YM]UK_SK_WK_UK[OD_UF[UM`SK[UM_WObYK_UO_[O`[UdUI`[Kb]M`]SbbSd_Qf_Qig_nox±¡º£¬¼¥·¿¤¼¾©¾»¤¼¾¨¾¿©»Á¨ÂÁ¨½¾§¼À¥¿¾¥¿½¤ºÂ¤½¾§»À©¾Á¨¾¾¤»Â¥¾À§¿¼¤½À¨¼¾ªÁÁ¨Á¿¨½Á©¾Á©¾¾©ÀÂª¾À©¿Áª¼Â¨½¾§Á¿¥ÀÁª¿¿¦À¿¦¾¾¬½À¦¿Á«ÁÁ¤¾Á¨¿¾¤¾Á§½Â¨¾À¨½Áª¾À¬»Á¤ÀÃ§¼Ã¨¼¿ªÂÁ¥¿¾¨¾¿¦¾¾©½¾©»¾§ÀÁ¨ÀÁ©¾¿¦¾Á©¿À¨º¿¨¿¾©¼¿¥¹Àª¿¾¦¾¿¨¾»¨»¿¨¾¾ª¼À§¾¾£½¾§¼Â¥Á½ªÀ½¦½Á¨½¿§ÁÀ§ÀÀ§¾¼¦»¾¤½¾©¼À¤¾¾¥¾À§¾»¨¼½¦¼Á¥¼½¨¾¾£¹¾§»¿¤¼¾¦¼½¥»½§¾¾¥¼À§»¼¤»¾¦ºÁ©¾½§»»§¼½§»¾¥»¾§¾¾§»¾¥»¼§»½¤»Á¦»»¤º¿£¾»£º¾§¹¼¤»¼©¼¼¤¾»¢»¼¥¸½¤»½¥¹·¥º»¥º¿¢º»¥¹¹£·º¡¹¼¥¹¿¦¸¹¡¹»¤»»¥»¼¦¹¼¤»»¤»»£ºº£·»¤·º¤º¼£»¾¦½»¡···¹¡··¡¸¹ ¸´ ´º§¸¸£¹¼¢µº ··¢¶¹¡¶º£·¹¢·¹¢··£·µ¸µ¸»©¸¹¢··¢·¹£¶º »¸¡·¶¢µ¸¹¶¶µ¶· µ·¶· ¶¸¢¶³³³ ´· ´·£µ¶¶·²µ ¶³ ´¸³µµµ³µ´·µ³³· ´¸·³¢´·´¶ ´²³´±³²±¶³³¶µ³±´±´±´¶±³³ ³³²³²µ ´µ ´°±¶±² ±³³³­±³±¯³®²°´±¡ ¡  ¡ £¡ ¡ ¡¡ ¢¡§ ¢ ¦¥¡£¥¡¡££¢¡¡£¦¡£¡£££¥£¦¡¡ ££§¡¢¨¡¤¡£ £¤¢¥¤¥ ¥§¡§ §£§¡¢£§¡¥£§¥©¡¨¤¦¢¥££¤§ §£¥ £¤¤¥§¢§£©¤¢©¤¦ ¦£§¡«§¨¥¥¢¥¢ª¥ª§¨¤¬¥¬§¨¦ª¨¬¥¨§«£¨§ª©«¤¬£«§©¤ª§¦£¬©¬¥ª¨¬¤¬¨®§«§¬¥¬«¬¦«§¬ª¬¨«§­©ªª«©¬«¬ª¬¦®ª««°§¬«­«¬«®¬¬«¬©°¨­¬¬¥«§zobqdqMwO=oM?_O:]I=YI:YD=QD5UB5QB=UB5S?:OD5O?5UF:MF8OD:SD:QF=OD8SK:UF8MF5SB8QI?Q?5S?5SD8QB8SF=QF=UK=SI8YK:YSDUQFbfQdw`ikz¡|·¾Ï£Ù«ß³âµâ¡·ç¥·ê£»å¨¹é§»é¦»ê¦»é¦½ë£¾é£»æ »æ»ãµÝ´Ö²Î­Ê¬¾©··­­¦§z|¢{£§¬²¡¡z|{xrtkngfgkk~gknitw­µ¾¥ÌªÕ¡³Ö¥¶Ý¯µä¯½ê¬Âì²Ãî´Äô·Éú·ÇúºÌú½Ñú¾ÐúÁÒúÃ×úÆÛúÇÙúÇÞúÉÜúÌßúÈàúÈàúÆàúÅßúÄÝúÅÝúÇÝúÄÝúÃÜúÁÝúÀÙúÂÖú¿Öú¿ØúºÓöºÒõ³Êê¨Çà¨ÂÝ ÁØ·Ë²Â­»©­¢ngff]{bxbx_|_w{Y{~Yzt[wuWtx[u|]twYtuYz|`|dz|`{z[zz]{{_u`zdwdkg{kolld`dk~oqtqidilu²»¼ÄÁ Æ È¢È£Ç¥ÇÅ£Ä¡Æ¢Á¼¡»·|­x¦t¡k]Y|tSwoIr`IlWDfK=`K8`O:UDDWM?YU?WK:[D:YI?UK?YI:YK=QF:YF:YIBWI?UI?[O=UQDYIB_MFYQF_O=[Q?`QFYUI_UD]YK]OFbYIdgUlz{|´ª¶®»¡µº¢¹¸º· º» ¹¹¢»»£¾¼¢½»¡½º¡»º¡¼º¢»¹¡¾»¢»¼£¸¹ »¸½¹¡»»¢¼¸¡»¼¡»¾¢º»¢½º¸»£¸·£½º¢½¼¢»º£º»¡º¾¢º»¡½»¸½¤»º»¹£¼¾£½º »»£À¼¼»¡»¹£»½£»¹ ¼½º¹º¼¡½¸¢»º¼º£¼»£¸º£»» ·»¢¼¼£º¹¤¸»¼¹£¹½¥»»¢¾º¡¾¹¡·» ¸»¡¼» ·º¢½¹ ¸¾¥»» º¸£»¸·¸¤¹¼¼·¸¸¥»·£¹º¢¹»£»» »»¡º¹ ¹¹¹¹·»£·»¢º··»¡»» ¸·¡º¹£¹º º·£º¹¡¸·¸¸¢·»¢»¸¢¹¸ ºº£»»¡»»º··¼£¸·º»´º º·¡¹¹¡º·¸·¹· µ» ¸¹¢·» ¸»¢·µ »···³·¸¶¶¸´·¶µ ³·¶µ¸³²·¶³ ¶µ¶µ³´µ³¶³º¶··´³·· µ·¶´´¸¡·µ¹±³´ ´·µµ·³µ³´³¶²´´·¯³³±°µ²·±³³¡²³´²³±³´´²´³³³´³µµµ³´±³³³±±®µ³²³³®²±±°°±²±²°µ¯±´°°±®²°¯±°®³¬±²³°¯¯­³±¯²®³°°¬±¬°°®¬®­°¯°¯­¬¬¬°±®°±¯²­°¬°­®­ª¬°­®«­­­¨¬®­­°­®­°©­¢  ¡¢ ¡¤¡¡ ¡ ¡¡£ ¢¤¡¡¢¤£¡¡¤¤¤£¡ ¢¤  £¢¡¦¥¡¡¤  ¡¢¤¤¥¥£¢¢£¤¤¢¤¡£¡¡¦¤¥¤©¤¢¡¤¦§¤¤£¨¤§¥¥¥¤¥¥¥¥£¥¦§¤¦£¦§¤¤§¦¥¥¦¥¦¦¤§§¤§¨¥¥©¢¤¨¨¦¥§©¦¥¨¨¥ª¦¨§¨¤¬§¬¬§¥¨§ª«¤§ª§¨§©©«§©¬ªª¬§§©ªª¬¥©©ª§©«¬ª¬®«©««ª¬¬§¬¬¨¬ª««¬§¬¯©®ª°®§ª­¬®«¬¬¬¬­¬¬«­®¬­±«®¬¯¬¬­­§¬­¬®««¯²¯¬¯®¬®­®¯¯°®®­¯­­®¯¯¬²°¬¯¯°±­­³®®­­±¯­©¯°°°±³°±¬³²¯±°°³­±±­¬®¥¨~¢ui{bkW~UDlWMbWI]UIYWDWSFWSD[SDSQKYQD]OISSDUKD[SDYOBUQD_WMWSFSUI[OB[UI]WF[SBYUKQKF]KFWQISKF[QMYWB`UO`YK_WK[`M`dQgu`nlt|²ÃÌ¤Õ®ß¥®æ¦¶ë¤¸é¬»í¬¿ï¨Àë®½ð¬¿ï«Áï¬Àí¨Áïª¾ï«¿é¥¾é§¼æµÜ·Ò¯Îª¿©¼¤¶²°¬¥¥¥| ¤¬®ª|{xw|oxon~lqfg~i|kki|fkoo¦­´Ã¤ÊªÓ¤®×§µÝª·ä®¿å¯¿ëµÃò·Åö¹Èú¼Èú¿ÐúÀÐúÅÕúÅÖúÆ×úÈ×úÇßúÌÝúÒÜúÎãúÐåúÐäúÊâúÊãúÈáúÉßúÊãúËàúÈáúÁÝúÂÙúÁÖú¾ÖùºÐ÷¸Ìõ¶Íì­Åà®¿ß¥¿Ò ¹Ð³Æ¯·¦§~unnfdgg|dfxf{{ffzd~{b~d|i|dkiiiixfnk{oqkqwxotirl~nqqtuklno~£¶¿ÅÆ¢Ì¢Î¨Ë§Î§Ì¥Ç©Ê¥È¡È£Ã¥¿½·³¨wlb`wU{lWqfSq]KgSFd[I_UK_UIb]M]OF[SF]UK_WK`SK`SK[UD]SIbUDYQO`YF_SDWUI_SM`UOd`Qf]Kg]Kd[Qb]Qb]Og_Ub]OkbQiidi~|{·£»¡±À¥¸Áª»¼¢¾¾¢½Ã¥»Ã§Á¿©¼Á§ÂÂ¨¾¿§¾À¨À»¥¾À¦¾À¦½¿§¼Á§¾½¤½Ã¤¿¿ªÁ¿¨¼¿¨½ÂªÁÁ§ÀÂ§ÁÂ¨¾À¥ÁÂ©¾À§ÀÁ«ÁÄ¬¿À§¾Á¤¿Á¬¼Á¦»Ä¦½¿§½Â¨¿Ã¨½¾¨¾Á¨¾ÂªÁÁ¬¾Áª¿¿§½Á¬¿À©½¾¨¿¾¤½¾¤¼Á¨¿¾§¾¾©¾À¨¼Ã§¾À©¾¿¦Á¾¤¾Á©½¾§¾Á§¾¾§¼¿©¾¾¥¼¾©¿¾ª¿À¬¿¿ª¾Á¨½Á¦¾¿¦¾¿¥¾¿¨¾Á¨¼¾£»¾§»¾¨»À¬¼¾©»¼¥¾Á¨»¾¨¼¾¨ÀÁ¤¿¾¨½À§¼¿§¼Á¬½¼£¼»¦½Á¢¹¼¤»½§¼Á¨º½§¾¿¦º¼¦¾¿¨¾¼¢¿¾©»¾¥»¾¦º¾¦»º¢¸½¢¹¾¥ºÀ¨¿¼¥»¾¦»¿¦ºÀ¥½¿©º¿¦½¼§·¼¥»¾¦»»¦¿»¥º¾¤º¹¥ºº¤¹º¤¸»¥º¹ ·»¥·»¤»º ¹»¡¶¼¡»» ·¼£·¸¢¹¸£¸¼¥¹½ »»¥¹º£º¼¢·º¡»¹£¹»¥»º¥¹º¢½»¥¶»¡¹º¢¹¹¢¶¹¡·¸¸·¡³»¥´¹·¶£·¶¢¹¸¡»º ·º¢¸¹¡¸· ·µ£··¶¶¢±·£¹¹ µ·¡´·¤º··¶¢´¶£´µ¢µ¸¡¸¶¤³¹·³µ¸··¶´ ·¸¡³¶µµ µ¹´¶¤¶´´´ ·¸¡µ¶µ·¡¶¶µµ °´¢´¸µ´¶·¡³·£´³¶´³³°³°µ ³³³³³³³· ³³ ³·³³³¶´±³³³´¯³ ³¯®µ¯´´³ ²³³³´³ ²³²¯¯¡¡  ¢¡¢ ¡ £¢¡¡¡¢ ¡¢¤ £ ¤£ ¤ ££¥££¥¢¢£¤£¦¤ ¡¥¢¢§¡¦¡£ §¢¦¡¦£¢¤§¡¢¢¤¡¤¡¥¡¥¡§¥©¡¥¢¥ ¥¦£§¥©¤¥£§£¨§£¥¦ª£¥¥©¡¤£¦¥¨£©¥¨§ª¤©¦¨¦«¥«§§¥ª£©¦§§¨§ª¦©¤©§«¦©¦§¥«©«¤ª¤ª©ª©¬§®¥¬©ª¦ª¥­©¨¨«§¬¦«§¬«®ª¬§«©«¨««­«¬§©«««®©®«¬©¬©«ª¯§«ª¯ª¬£©¢tgt`gQYDqOB_K:_KBWD8UI=UI?QF8QD8SF=Q?8SB5QD5MI=QB5QF8QDDOF:UI?OF?U?3YF5OD8UD8Q?=QD8UD:U?5QI:YF:YO=WI?WM?YMBWUD_[Ibt]lkt{­¾ËÙ«Ý°á³ä£¶â¡µé¥½ê¤¼æ¦Àé¦»ê©½ç¦»é¥½ç»è¡¹ä ·â·×°Í¬Ã©½¤±ª¥ª£¤u{qux£z xrlbgglzk{]|]tYrrQxrYrt[zqWz|]x{]z~`zd{d`bl~ir¢~«¶»¡Ç¦Î­Ì­×¢´Ü§·ß¬¹ë®½ð°ÂóµÆö·Êú·Íú»Ìú¼Ñú¾Òú¼Òú¿ÔúÆÖúÃÙúÊÜúÆÝúÉßúÊáúÄÜúÃßúÆÜúÆÛúÆÛúÁÙú¾Ùú»Óú»Ïù´Êó´Éî³Åé¯Æä§ÁÙ»Ð·Ê±Â«»¤±z£¡r kgb``]z]|][x[z~UzzY{~[x]z]|d|_~f~`zw`|wb|`z``|]{bbd|g~d|gnb|f{wfzb{f|gw`|l|g{f|`zbzw`zf~r{¦²¹ÁÁ¡Ç¢Ê¡Ç¦Ä¡Æ¢Ä¡Ã¤Å Á »º³{«x¥qgbW{tQudIrU?gO?bK:_F?[KBUM?[QBYSBY?:YK:WK=UK=[DBSOFYM:UK8YI=UM?YD=YODUM?]K?]OI[KF]IB_O?[QD]QD`OB_UK_UDfUKfn`n¤² ©¹¡²½¢·»»·¡º¼ ¸¼º½¡ºº¡»¹¡»»¾»»»¡¼»»» ¸¸¢¸¸¡ºº ¼·¹½¤º»¢»¹¼À§½¾£º»§»»£½»¢½»¡»¾¥»¾£½½¥¼¿§¼¾¡¼¾¡»¹£º¼¡¾¸¼»£¹»¡»¹»»¤½º£»»£»»¤º»¡¸¹¹»º¸¤»¹¡»·¡·¸¢ºº¢¾¹£¼½§¸¹ º¾¢»¾¢¸»º¹»»¡º» ¹¸¸·¡¸¼¥¸· »¸»½¡º·¸¸¡¹»¡»º¥»½£¹¹£¸º ¼¸ ¹»¢¼º¡»¹¤»º¡¸¸¡»·¡¸¹¹·¹»£»º¡¸º¤¾¼¡¹»¢¶»£º¸¡¼·¡¸¸£¸¸º·¸»¡·· ºµ·µº¶¹¸ ·¹ ¹·£»º¢··¡¹¹¡º··¹µ·¡»¶¸¸¹¹¸¸¹¹¢µ³··¸´º¸¡µ³·³µº¢µ³¶··¶ ··³µ´¶¢³²¸·¹³²µ¶µ··¡¶·¡µ´·¶³¸ ¸´¶··³ ³´´¸±´µ³´¸´·³´·³´·¶±·³·´µµ·µµ²°²´²²µ³³´³°³´³´²³³±²´³³²±´³°²°°²²±°¯°³®°²°µ³³±®²³±­¬¯°³°°´³³±²±®²²³­°³­®µ°±²±°³¯®±¬¯¯®­¬­°®®®®®¬°«®­°²®®°©®±°¬®¬­®¬«­«®«¯«­­®¬¬ª¯¬¬¬¯£¡¡¡ ¡ ¡¢£ ¢¡ ¢ ¡¡£ ¡¤¡£  ¤  ¡¢££¤£¢¡¡¢£¢¡¢¢ ¢¡¥¡¢¡¤£¤ ¥£¢¦¤¤¦¢¢¥¤¢¤¨¦¥£ ¤¢§£¦¥¥£¦¤¤¥©£¦£©¨¨¢¨¦¢¤¤¦©¥¥¥££¨¦¨¨¤§¦¦§¦¥¥©¨«§¦§§©©¨©¦ª§©©§¨¦¦§¦ª§««¨§¦««¦«¨ª§«ª¨©¦©¬¨ª¨ª¬­ª§¨©ª¬©ª§ª¬©¬¬¨«¬ª¨¦«¬¬¬«®©©©¬¬¬ª®¬°«¬¬®¬¬¬¯«¬¬¬¬¬¬­©®®®¬­°®­¬¬®­¬«¬¬­°°¬¬­¬¬°°²¬®¬­¬¯®¯®¬¬®°­­²®­±°¯²²³®ª®®¯®°°®¯­²¯¯³­°®®­ª®¥¦o|giSzYKnQIgQK_UK[OF[UFYQDWQDSKBYSDSKBYMFSMBSSISMB[SDWIMWODYSIUSIUQF[ODSMB]O?YIFQOFWMB[MDWUK[WF]SM`QI]YF`_M]`QblYgkuu|¬¹ÉÖªà¯â£·é©¹ê¤»ì«¼î®Àï§¿î¬¿ð®¾ïªÃí¬Áò¦¿í¨¿ë©¼ç¢¸Ü·Ñ°È«Ã¦½¢­«ª~¢ zzz ~¤¡~|{ouollifgf~`]|b{]_fgdnnokou{¬´»»¤Å¨Ê±Ð¯×¡°à¨·â«»ì¯¼ñ³Áô¹Ãø´Èú¹Ìú¼Ïú»Ðú¿ÒúÁÓúÅÖúÇÚúÍÛúÌßúÌßúËáúÌÞúÈàúÆàúËÞúÆßúÂØúÃÙú¿×úºÒú¼Ñ÷·Îô´Ëí¯Æé®Ãä«ÁÛ¢ºÌ¸È®Ã«Ä¦¹¥²«wrlniliiiidfilkliidnknoronoklgokliki|d{iwl{o~ofig{f|{g~tz~¬¼ÄÈÌ¦Ê¦Ê©È©Ë§Ë©È¨Ç¤Æ¤À ¿º²«x¡wng]~qStfQnYOkYFfUK[SI]YI_WM[UMWUB_SDY[KWSD_QM]UK]WI]UI[QMUUM]SF[WK[SF][K_WO`[M_[M`WI_WI`YKb[O``S_bMb`Qlndoxt| °¡£½¥³À«·¾¤º¼¦»À§¾¿¨¾Â¦º½§¿ÀªÀÂ¦¿¼¥¿Â§¾À¥¾¿¤¾½§¾¿§½¿¥ÀÁ¨»Á£¾Á¦¿Á¨¿Ã§¾Á¤ÀÁ©¾¿¬¾Â«¿À§¾Ä¨ÀÃ¬ÁÀ¦ÁÁ©¼¿¦Á¾ª¼À¬¼¿¨¾À§¾¿¦»À¤¿½¤¿¼¦¼Á§¾À¦¼¾§¼Á¦¾Á¨¿Á«¾À¨»¾§½À§»Á§»¾¥½»¦¼Â©¼Á¥½¾§À¾©º¿©»¾¨Á¿£¼¿¦¾½¡»¾©»½¤¾»¥¿¿¦À¾©º¼¥¾¿©»Á§¿Â¨½¿¥¼Ã¦»¾¢¾À¨½¿¨Á»¤¹¼¥¾¿¥»¿¨»¾§¾Á§»¾§¼À¦¾¿¥»¼¨½¿¦»¾¤»¼§¹½¤º¿¨º¼¤¾¾¡¸¾¥·Á¦»¹¤À½£»¾§¾¾¢º½§»Á§»¼¦½½¤»¾¦»»¦¼À¦¼Á¥¹¼¦½»¢¾¾§º¿¨½¼¢º½¥·½¤¼¾¦»»¡»¼¤¸»¡º¹£ºº¥¸·¥º½¤º»§¸¼¸·¡º·¥¹¸ºº ¸¹¡·»¤»»¤¶»¤¹¾¤º¼¤º»¥·»¥¹·¢º½¦»»¡¹· ¹»¥·¹ »» º¹¤¹º£´¸¦¸¸¸º¢¶¹ ¹º ·¹¤µ·¢·· ·¸¡··¡·¶¡¶¹ ´¹¹··¶¢·¸ ¸µ¤¶¶¡·µ µ·µ´µ·£³¶¶·µ¹ µ··¶¶·¢³³¤¶µ´µ¡³´¡¶¶ ¹¹£³³³µ´³µ·µ·µ´´¶ ³·¸°·µ±µµ³³¶³µ¡µµ³´±µ³³°¯³³³³´³²µ³³³± ²³®¶³±®³°°°·±²®¯°±°³³´®²±°­¯³°¯²° ¡¡ ¡  ¡ ¡¤£¢ ¤¦¤¤¡¤¥¡¤ ¡£¤¥£§¡¥¤¤¦£¡¡¢¢¦£££¡¦£¥¢¡¦§¢¥§¡©¦££©¡¥£¦ ©¡¦¢¤¡¥¥¦£¦£§ ¨¢¥¦¥§¤¨¥¥¡¦¥¥¥©¢«¢©¤¦¢ª¤ª¤§¥©©ª¤§¦©¦¬§©¥ª¦­£ª§«§ª£©¨©¦©ª«¦©¦¬«ª¨§¦«¥¨¨ª©©©©¥¬¦ª§¨§«©¬©¬©¬§¦§¬ªª¨¬«¬¨ª¬«§­¦«©¬«­©©©tlo[YItO=fQ?_F=YD?UF?Q=8OD5QD:MD=QD8OD:MD?S?:OD=QD=OB?UF?UI?SFBUI?KI:SD5Q?:O?:QD5QB8QD=O??WO?OQ:QI?UI?UM?UMBWYM]kYdftu|¯¼Ê Ö¤ß °á ´æ¦·ç¢ºé¥»ë©ºí¦¼é¨¾é¦»é¤¾ê¦¾ç§½é¡»ã·Ü³Ï¬Ã§½£²£| |wtooktwxzxuqnnkdggg~d`|`~|]|~``gfg`igfolot¡t­²»¼ Ã£È¨Î®Ê¢¯Û¢³Û¨³ß¨¸æª»ï¯Âò®Áõ®Ãö¶Åù·È÷¶Éú»Íú¿ÓúÄÒúÃÓúÆ×úÈÙúÆÝúÆÛúÃÜú¾ÛúÁÚú¿Öú»Óú»Óú·Í÷³Òï±Éð®Ãì«Èã§Áß¦ºÝ£¼Ö´Í´Ä¬Ä©¾£¶¥²z¨uonngigkgiikn ninillnknqwqniddbYb{~g|b]|x]{uUut_rxiuitgwdz~`wz`t|[rx]tz[towx±½ÃÆÈ Å Ä¥ÃÄ£Ã¡Á¿º¹¶°~¬zqg[tUwtSr_DlODbMD`K?WKDWD?UI=YI=SIBWF:UI=UI?YD=UIDSI=[D:WBDQI?SF?YK?WI?UIBUODWO?WKIWMBWQFWKBUSF[SD]UI`ODb_Yfqlq§²ª·¡²···´·£ºº ¹º¦»»£º» »¹¢¹º »º£»¹¡¸»¡»º£½»¤ºº¢¹¸£¹»¤·»¸»£ºº¢¸½¤¾»£¿¾£¹¹¡»¸£»º¤»»¤º¹£º½§º»¡»º »½¡º¹£º¾ »»¢¸¼£»»¢¸¸ ¸»£·¹¤¸»»½¡¹»¤»½¢»»¡¸»£º½¢º¸£¹¾¤»¸»º£º½£º¹¡»º¢»º£¼½¥ºº£»»¥º» º¹¤»¸¤¸¹ º·¡¸¸¢¸»¤¹¸¹º ´»£»»¡¸»¤ºº¡º·¢·»¥º»¡»µ»»¤¸·¢»·»¸¥º¸£¹¹£»»¤µ¸ º¸£¸º£»¹··¡·· º· ·¹¹¹¢¸·¢·· ·³¸¶¢¶·¡ºµ¢¸¶¡··¢¹·µ¸¡·¸¥¹¸ ¹µµ»¥¸·¢¹µ·» ¶»¢»¹¹·¡·µ£¶¶¡µ·¹¶····¢´³³¸µµ¶·¡³¶³´µ³´³µ´¸³±³¢¸·µµµµ··´µ ³´¸··¶°·µµµ´ µ·µ´µ³³·²±µ²³³º³µ³²¶´²µ´°²¯µµ³³³²¯³³²²³±²²µ±´±³¯±²²²²°³­°°³¯³³²°°²¶´²±°²°²²°°¯³®±¯°°³±±± ²³³²±±¯­±®¬¯°¯°¯®®¬­¯¬®±¯«®ª­¬¬¬°®®¬±¬¬®®¬¯­®®¯­°ª¬­°®®­¬¬¬«­«¬­®««­« ¢    ¡ ¡¢¢ ¡¡ ¡ ¡ ¡¡¢ ¥¢¡£  ¤¡¢¡ ¦£££¢ ¡ ¡¥ ¤¡¡¡§ §¤ ¥¢¢¡£¤¦¡£¥¤¡£¢£¢£¢¡¥¦¦£¢ ¤¦¤¦¦¤¦¤¦¤£¤§¦¥¥¨¦§¥¦¥¦¤§¤¥§¤¦©§ª§¥¤¥¡¦¢¨§¦¤©¡¨«¨§©¤¨§©§ª¨¨¨§§¬©§©§©ª¦«¨¨¦¬¥§©ªªª§««§§«¨®©©©ª©«©ª­«¬ª¨©¬¬©©ª­­­§­­¬ªª«¬««¬«§¨§¬¨«ª¬©««®¬¬«°ª«¬¬¬±©®­°¬¯¬¬®«¨®®¬¬«­²¬¯¬®¬¬«¯­­®®¯®­­®²¯°²­«²¬®¬­­±«°²³¬±¬±°®°¬²¯¯±¯®¯¯²°¨© §onq[[OxWDd[KfQIdSI]QFWKBYSDWSBSMB[SBSSB[SD[MFWSI[QFUSI[SK_SIUQIUUBSO?WOBWQBSMIWQF[MDSSIUUF[[KW[F[UF]UK[UM_WK_fUdtbin{©½ÌÓ¨Ù£­ä§³è§·í«»í«ÀïªÀï­Àò­ÁïªÂí¬Áð¬Áð«¿í¬¾ë¦½ä¸Ö³È¬» ¬¢~£x§zorq| z ~¥{¢~¡|zxrqqnqqkllqtt£{¬|¬|°zªt©w®|©x¬¯µ·Á¤Æ£Í¨Õ¡­Ï³Ö±Ø¥´Ø¡¶à¥¶æª¼ê©¿í¯Áï³Áô³ÈøµÆú¸ÈúºÌú¾ÍúÁÑúÅÖúÄÔúÇÛúÊÙúÆÛúÇÜúÆÜúÅÛúÀÜúÁØú¿Ùú»Òú¸Îú³ÎöµÌò±Ìí¯Åç§Ãã¨»à¥¾Û¢¹Î·Î­Í¯È§Áª¿¤·³±w§{¦t¦tªt§w­|¯{²|µ{·~»¼{¡»¢»£¿¢¹¤¸·£®° ¯|¬{¨w¤wuqngilbddz[{]|gxlg~fxdd~gx~`z|_xn{x~ª»ÃÄË¢Ç¤ÌªÈ Ë§Æ¤È Ç¡Á¤¾½¶¬|§zog`~x[xlKubOk[Kk[I`SI]YI]SI`SDUWM`QBbSK]QIbOB[UKYSI[SM]YMWUM[UIYOI]WF_YI`]K[]MdSK_SI`YK_[I`WOdYM_[Qb[Kdb_bqdr­°©¸ ®·¡´º ¶À¥»Á¥»À¨»Â¤»À¦¾Â©¾¼¨¾Á¡¿¿§¾¿¥»¼¤À¿§¿¾§¾¿©»¿¦»Á¤¾À¦¿¿ª¾¾¨½À§ÀÂ§ÀÀ«¾À§¿¿§¿¾ªÀÁªÁ¾¦¿Ã¨¾¿§ÁÁ¨¿À¥½À¦À¿¨ÀÀ§¿À§¼¾¥¿Ã©ÀÁ©¿¾¦¼À©»ÁªÀÀ«½À§¾¾¨»Â¬ÁÁ¦½¾¥¼¿¤½À§¾Á¨Â¾§¿Á¡¼¾§¼¾¨À¾¦¿¾§¾Â£¾½¨¾¾¥¾À§¼¾¥»Á¥½Á«¾¾¥¿¾¥»Á©¾½¡½¾¨½À§»½¨»¾¦»Á¤¾¼¡¾Á¨¾¿¤»½¨¾¿¬º¾¥»¿¥»½¦»Á¢»À©½¼¦¼¾§»¿¦¾½¨½¿§»½§¼Á¨»½©¿¾¤¼»§»½¥¹¾£»¼¥¼»¥¹¾¤¼»¤»¾¤½½¤½À£½»£¹¾¨½¼£»¼©º»¤º¿©¹½¤»½§¸¾¦¼¼¤º»¥¸¼¤º»¥·¼ ´¹¤»¼¤·»£º¼¥¸º¡¹º¤º»§¹»·¹£³·¨¶»£¼º¡·½¦ºº¦º»¦·¹¥»»¡º¼¥ºº¥·»¢·»¤¸»¥¸»£»¹¡µº¢¶»¢¶¹ ¹» ¹µ¤·¹¤ºµ£·¹µ·¹»·· µ¸¢¹¸···¶¡¶·¡´¸ ³µ¡··¡´¸¤µ··µ·¸¢¶³´··µ ´·µ´µ· ´µ¡µ¶ ¶´¶·²µ³µ¡´¶¶´´·¶¶¡µ´²³¶¶¡³· ¶³¡²³ ³´ ³¶µµ¢²´ µ¶´³ °³²®±·³³²³³°°³²³³²²¯³¶³³³³³´²³ ±³¯³³°³°¯°²¯³³°°±±¯°°~ ¢¢¢¢ ££  ¡¡¡¢¡¤ ¡¡¡ £¡¥¢ ¡¢¥¡£¡£¡ ¥¡¥¡£¡ ¥£¢££ £¥¡£¥ ¦¤©¢¥¤ £££¥¤§¤££¡¢§¡¥¢¦£¥¥¦¡¨£¨¥¥¥¦¡¥£¥§¥¤¨ ¤§£¤¥¥¥£ª£©§¢¥§¤§¤§¥¨¨©§¨¥§£«§¦¦­¥©ªª§¦¨¬¦¦§¦©§¤«¨ª¥«¥¥«¨¢§§§§ª¥¬ªª¥§«­©­¨§§«§«ªª©®¥¬«¬©¬¤«§«©«§«¡ktYbKqMFkI?[I?YD=WD?QB:UD=M?:Q?8MB=IB=QD=OD:M?:SB=KIDQ?8OF?MD=OK?OB8QD=K=3OD=OD=QD:QD=QF=KIBQK:QO?SD?SI?SIDSOFU`Qbt`bt{­ÃËÑ§Ùªà¡°ä¥µè¥¶é©ºé¥»è©»ê«»ì¥½ç¥¹ê§»ç§»æ£·â³Õ²¾©·¡­{trro~k~gg|n|r|tux~£xzwutknq¢ro¢n¡o o r¤t®t­|°|³|µ|¸ºw ¸~·|µ~´¶»½¡Á£È¦Ì¦Ò©Ò°Ó­Ó®Ú¢¯Ü£µÜ£·ä§¸è©¾ï¬»í¬Áð¯Àô³Ä÷µÉù¸Êú»ËúºÏú½ÓúÁÏúÃÒúÄÖúÁÕúÁÔúÀÓú»ÒúºÓú·Ïú³ÓùµÈô®ÊñªÇëªÂé§Áâ¡ºÝ£¹Ü·ÖµÏ°Í¯Ê©Ä©Ã¦º·»|¹z²r³w±w³{·z·¾¡Ã¢Ç¥Ê£Ó¦Ñ¬Ï«Ò©Î­Î«È©Ì¬Ë§Ç©¾¢¼¢³¯~¥t q§q kiqidY__[wz_zwYwt]u|[ttWxt`ruYq[rYwwitx~©¾ÃÁÁÆ ÄÂÄÃÁ¾¸¼±|§x£unf_zrUtdDq[FdQ?_I?]??SBFSM?WD=UK?UF?WD=SM=OIDS?DMDBSI:UBBQI:IKDQFBUI=ODIUK?WMDSDFSKBWOBWKDSOBYQFYMDYQI]MD]`Yb{tt°®«²³»¡¶¸µ¹¥¶½£ºº£»»¡º¹¡·¸¹º ¹·¢·»¡¹» »¸£µº£º·¹¼¢¼¼¡¹»»¹£·¾¥·»¢»¾¥·¼£¹º¥º»£º»¢¸»¸¾¦º¸¤»¸£¾º¤¼½¤½¼£¸»¡»º£º»£º¹ ·»¡»»¥·» »»¢¼¼£¸·£»º¤¸º¢·»¡·¹£¹¾£º»¤¸º¥¹¸¤¸½£¸¸£¼»·»¢¸»¡º½¡¹¹¢·¹¢¸» »»¥º»£º¹£½¹¡¹¸ º· ¹»·º¥º¸¡»º£¹¹£º·£»º¤º¶¸·¡·½¡º·£¶·¸º¡¸º¥º¶µ¸£¸¸£··£»º¹·£ºµ·º¡·» ·¸ ·¶£¶»¢¹·¶µ¡··¡¼·¡··¹¸ µ¸ ·º£¶··´¤···´£µ·¡·µ´·¢´·¡¶µ ¶·¸·´¸¡·¶¡´¸´µµ·¶·µµ³µ³¹ ´³³³´³ µµ³³³µ¦¶µ·· ³´·µ±²µµ·µµµ³³¶³¡¶³´³´¸³·¶³·³²´³±³² ³³³³²´°°²³³°¬³µ²±²¯°²°°±²²²°±°®°¯°°°²¯¯®³®¯³±²³³³²±°®°²®¬¯²²°²­®²¯²±°°²±¯¯°²°¯°°±°°­±±°¬±®­­­¯ª¯±ª®¬¬­®¬®««ªª¬¯ª¬¬®¬¯­«±¬®®ª­­¬ª¬­®«¬¬­¬«ª¬¬¬¬®   ¡ ¡ £     ¤¡¡ ¡¡ £ ¡ ¢ ¢¡¤¡¡ £¢  £¡¥££¤¡£¤£¢¢¡¤¢¡¢£¥¢¤¤¤ ¤¤ £¦¢¤¢£§ ¡¦¦¥£¥¢¥¦¨¤¤¥¦¦¤¦¤¤¥¤¦¥§§¦¦§¦¦¨§©§¦¦§¥¢§¨¦§§¥¦¨¨¦ª¨ª©©§¦¦¬¦¦§¨¦§¦§§¨©¬ª§©¦¦«©¨«©©¬¨¨¬©««§«©©§¬©©§¨¬¨¨¨¬ª¬¬¨«¨¨««¬¬©¬¨¬ª­«««¬¦¬ª¬±¬ª¬¬ª­¬«­¬¬¬­«ªª¬¬¬««¬®«­®¬¬°¬±¬±«¬­¯¯®­®¬ª®®¬¬¬¯­®«¯°®°¬­¯«­°®®¯«®±¯³°¬¯¯®±®®¯°°®­¨¬ §iw_lSwUFoMK`UK`QBYUFWOBWSIUMD[SBYSBQODUOF[QDUSBYQIQQF[QBSSFWSKWWDWMBWSDWIBWSFSOFYSBWSK[SDWSM]YK_YK[QF`QI[WI[_O`l[ilu¥¹È Ñ¤×®à±æ§´é¨µï©¶ï¬¼ð«Áí©½ï¬¾í¬Ãî­¼ð­Áë¨¾ê£ºÞ³Æ®Ã¢º §|wzulfknoxquz{£~²ª~ª³¹º£Á¢Å¦Á¨È©Ê­Ë¯Ò®Ì¯Ò±Õ°Ð°Í­Ð¯Ò°É¬ÊªÈ¨Ê¬Ë¨ÌªÐ¬Ò®Ø¡­Ø¤³Ü¡·Û¡¹ß¥¶ã¦¹ä§¸ç§»ì¨¼ð­½ò©Ãô¯Æ÷·Èú·Ëú·Ðú¾Ìú¼ÒúÀÕúÁÕúÃÔúÀÖúÁ×úÃÕúÁÖú¿Ûú¿Õú»Óú¸Óú·Îø²Ìö°Èô¬Æï¬Èì©Àä¤»ã¤¶Ü·×³Õ°Ô±ÍªË¬ÉªÈ©É¨Æ¦Ê¥È¥ÊªÌ§ÎªÒ¬×±Ø²ã·ã¢¸ê ºè£¿è¢¿ë£¾ç¡¾ç»ç¥¼ä¡¼â»ÜºÓµÓµÇ¬Ã¦¼¨¹£¶¹ µ´®{®u¨u¤loiffb]{]|gw]zg{f{i|u¡¾ÆÅÈË¢È¤Ì¥Ç¦Ç£È¡Ã¢¿¿µ³¨|£uq`_{oYwgOk]If[IdSF`SFYYF[YFYSMWQF[SK]SKWQK]MI[SDY]K_OI[SFUSF[OM[YI[MM[SK_YD[QKY[O[]M][O[]K_]M_WF`]QdWIfb[drgrµ´¬³°¾¦µ¾¨·Áª½À§»¾¥ÀÁ¢½¾¤»À¦¾Á¤»¿¨¾¿«¾À¦¿Â¬»Á©»¾ À¾§»¿¦¹¾§»½¦»¿«¼¾¥¼Á¨»Á¬½Á¥¾À¦»Ã©»½¦¾¾«¼¿©»Â§¾Á©¾¿¨½¾©¼¼§¾¿¨¾Áª½¿¨¿Â©½Ã©¾¾¦¼¿¨¼Á«¿¿©Á½¦¼Â§»¾¦¼¿ª¾Â¦¾¿©»¿ª¾À©ÀÀ¥½¾§¾À¥¼¿©½¾§¾À¬½À§»¿¨¿º§»¿¨¼¿¦¾¾¨º¾£º½¨»¿§¼À§½½§»¿¦º¿§¼Á¥»¾¨¿À§¹¾¦¾½¥»Áª»À§º½¦¾½¦¼¾¦¼¾¦¹¿¨»¾£»½§»À¥¸½§¼¾£½¼¦¸»¦º¼¤½»¦º¾«ºº¤½½§º¾¥»»¨»¼¥»Á¥»¾¥¹º¨º¾¦»¼¤»¾¨¸½¡¼½§·º¤¼¼¥¹¾¤»¾»¼¦»»¤¸º§¹¸¡·¼¤·½¢¹¼¥·»¤º»¢·»£¶½ ¼·¡·½£¹º£½»¢º¹£¸º¥»»¤¸¹¥ºº¨¶¹ ·¸¡¸»¢¹·§·¸¥¹»¤·¶¢µ»·»§¹¼¦¹· ·¶¢³¹¤··»¹··¢³·¢··¢´¹¡·¶³¹··´´£µ³·¹µ·´µ ´¶³¶¡´¸ ·¹ ³µ¡¶µ··¡µ¹¶·¶·¢´»³¶·³´¹ µ¶´¶³µ ³µµµ¡·¶ ³´ ´¹¶¶¡´µ³¹¶°³·³´³´ ¶·²µ¶µ¯³³µ³³±´¯²³²±·²±²¯°µ±®²±±²°³²²°³¯²²°¯´°´³°³³±³²¯³±¬²¯³²¯® ¡ ¢¡¡¥¢£¡¢¡ ¤£ ¡£¢¡¡££ £¢ ¡££¡¥¡¢¡¢ ¦ ££§££ £¡¥¢§£¥ ¡¢££§¡¨¦¥¢§¡©¡¤£¥£§£¦¡§¢¤¤£¡§¥¤£¦¤§¥§£¢¤©£©¨©¤§¢§¥§£¦£§¦§§§£ª§¨¦©¥ª¤¨¨ª¥©¢§¨©§¨¥¦§§¦«©©¦©¦«§ª©©¥¨§©§ª©«¦©©¬¨ª¦¬©¬©©ª«¨««¬«­««ªªªª¨¬¦¨¤§¢{{diK|[FoQ?bK8_I:UI=Q?8QD5QD8K=:SF:QI=QD:MD5OF:KF:QB5SF=OD8KB:OF?SB8M?5M?5K?:I?5O?8QF:MD5MI=OD?QM:UI8OK?UF5UM=UUI[lWdkr¬µÅÐ¢ØªÙ­â¢³ç£µè¥ºê§·ë£¸æ¤¼ë§¼í«»é§»è§ºã¢»Ö³Ê°È¥¿ªtoigf~x`{[|g|d~ikotqtr x§x®z³»Ä£Ç¨Ê©Í¬Î²Ö±ÙµÛµÝ³Ý¸ä¸âºà»ß¹ß·Þ¸Ý¸Ü³Û·Ò²ÓªÌ«Î­Õ¬ÐªÐ¬Ó®Ó®Ø°×®Ü³Ü³á¶â¡·è¢¸ë¥ºê©»ñªÁó°Æø³Äù´Êø¶Ëú·Ìú¸Íú¹Óú¸Ðú¾Óú»Óú»Òú»Ðú»Ñú·ÐúµÏø±Î÷®Ì÷°Êò­Åë¨Áì¥Áä ½ß»Ù´Ö±Ò®Ô¬Î­Ë©Ì§É¦Ç§É¤Ì©Î§ÎªÒ¬Ø³Û³Þ²á¹ä¢»ë§»ï«ÃïªÃó­Áï¬Ãñ§Äî¬Äï¬Åð«Âñ«ÁéªÃæ ½à¸ÙµÒ³Ê¯Ç­Á©Ä¥Á À£¾·³~­w®u¦rnlbg``|Yz]w]wdbui~x|°¼¼ÂÃÂ£Ä ÅÄÀ¾¼¸µ®|¨wrf[~UziOq`FiQ:bM?UK=UI:SM?WF:UO=UDBUD8YK8OD=OB:QDBSK?QD8WD:SM?UF:QI5SKBOKDYM:WI?SMBYF=SKBSI?WK?WO=SM?WQF]QI`_Ubnqu ±¢¬©³¡±»¡´·£¹º£»½¡»··¹¹»¢¸¹ ¸» »·¥¹¸¦»¼¡¼¸¡º·¹» »½·» ¹º¡ºº¡»¾··º¿£¹¼¡»»¹»¡½½£¸¼ »»¸» ¸»¡º»§¼»¥º¾¥»¸£»¼£·¹¥º·¢½»¡º»£»»¹º£»»¢º»»º£»»£·¹¢»»¡»¼¡º¸¡¸º£¶»¤ºº·¸¡º¹£»»£·º¡»¶£¸»¡¸º¸¸¡·¸ »¸¡¹»¡¸¶¤¹¸ºº ·¼ ·¸ ¹¹¡¸·¤º·»· ¸¸¶¹ ¶¹¹¼¤´¹º¸·¼£´¹¸·¢º¸¶¸¢¹¹·¸£¸·¹·¶¸ ·º¸¸µ¸ ¸º ·· ·¹ ¸·¢¶¶»···¡µ¶ ¹µ···µµ·¡¸¹·´µ³µ¸¡´··´¡¸¹ µ¸´µµ·¡³·³´·µ ³µ³³µµ´µ²²³³³´µ¶µ³µ³³·³²³´³·³µµ¹µ´·³³·´³³²´¶²µ²²µµ³³³³³³²²µ³³´²³²±´°±³³³±°°²°±³°³³²²²¯´³±³±°¯°¯°°²³²°°³²²­²±°±±°­°®¬³²²±®¬³°­°°®¯²³¬®®¯¬­­®¯±­°ª¬«¯®®°¬®±®¯¬¯­¬©­«¬¬¬¬¬­ªª««¬°®«¬¬®­®°®©¬¬¬¬«¬¬¨«¬¬¬«®¯¡¡¡¡¢¡ ¢ £ ¡   ¤ ¡¢ ¡¥¡¡ ¡¢¢¡¡¦ £¡¡¡¡¡¥ ¢¡¡¦ ¢¤¡¢ ¤¤£¡£¢¢¢¢¢¢¤£¥¦£¢¤¥¤¥¦¡¡¡¤§¢£¤¦¤¥¥¦ ¦¦¤ ¦¤¥¥¤¦¢£§¤¤¥§¡¨¥¥¨¦¥¦¦¦©¡£¨¥§¬¤§¥©¨«¨«©§ª¦¦§©¥¬¨¦©¦¤§§§©§§¬ª¥ª¨«©¥©ªªªª¨©§¦©©ª«¬¦©¬¨¬¬¨ª¬¥¬©¨ª¬©ªª©¬¬««¬¬­¬§¬ª©¬ªª«¬¬¬¬«¬«ª®­¨¬¨ª­®ª­¬­¬«¯­ªª¬ªªª¬­®®«°¬¬¬«­­°¯®¬±­­«­¯¬¯¬®¬¯¯¯¯®¬­±¬¬±¬¬®®¯­³²¬­¨«¦§{bnQbOq_MkWF`QI]QKWMKWWISUK[K?WQDUQMWODUOBUQMYOFSQDWUKQUBWI?QOFSKFWIDYQIQKBUOB[OFQOD[OD]WFWWMUSDYOF[SB[UB[UM[dUdgq~µÂÌÖ ¬Ý ¬ã¤³è§µë¬ºíª»î­¾ð¬Áí¬Áï«¿ò¬Áî¦Áí©½å¤¼Ü¹Ù¯Ïª³¡{rnrliqooz¥u¦z¤|«~£~­~¬µ»¡Æ£Ò©Ø±ä§¶é¨»ì­Âï­Ãñ®Ãò®Æï¬Èô±Çô¯Èö±Èù°Æõ¬Ê÷®Æó¥ÂóªÃñ§Ãð¨Åë¢Áç½ä·á¸à¹àµà·á¶ßµá´à·à·à¡¹á¹æ ºë¤¹é¨¾ï¨Àó±Áô²Ãø¶Çú·Äú¸Ìú¹Òú»Ðú¿Óú¿ÖúÃ×úÁÒú¿Öú¾Óú¿Øú¸×úºÐú»Òú·Ïú´Ðù³Ì÷±Èñ¬Æî¬Áê¦¿â£¼ã»ßºÙ´Û³Ù±Ô±Ö¬Õ®Ö¬Ø¬Ù¯à³â³é¡·é¤¾ð¢¿ô­Âö¬Æú³ÈúºÉúºÑú¼Òú»Íú»Òú»Õú¹Ðù½Ðú¾Ïú½Ðö³Ìõ°Ìî­Âë¨Âá¢½á¡¶ÝºØ³Ó®Î¯Ë®ËªÇ¥À¥¼¡¿¹³z­{¤x¦w¢qoikkkq|r|¬¼ÄÆ¡ÉÈ§Ê¤Å¦È¤Å£Å¢¿Á½²°¬x qi`|x]zqSqfQnYIdSF]UK[SM[QD][F[OM]QF[SKYSK[MDWQMUYKYQBYWK[UK_OBUSI[QMUWF]WOYQKWUK[WI]WKYWObYF[[K_YM_[KbYI_b[bulr³¯ª¹¥­Âª»Á¥¼À¤»À¥»¿§¾¾¥½À§¼¾¤¾¾¨¾Á¨¼Á§ÀÀ¥¼¿¦»¿£¾¿£¾¾©»¿©¾½©À¿¨ÀÁ©¼¿¦ÁÀ¨½¾«¿¾¥¾Â¥»Á©»¼¦»¾¤¾Á¬½¾¥¾À§¿Á¨»À¦¾½¥¾¿§»½©¾À¨¿Á¥»Á¥½À§¾¾¦º¿§À¿¥¾Á©¼½ª»½¥¼Á§»¾¨½¾¥¿À§½¾¥»¿¡½¼ª¼Â¨»»¦¾Â¥¼Á«»¾¨¼¾¦½À¦»Â©ÀÀ©½Á¨¼¾¨¼À§½¿¦»Á¤»¾¨¼¾¦¼¾¦»¾¨¾¾¦»½¥¾¾¦½½¥¹½¦¹¾¢¼¾¤»½¦¶À¦½Á¨¼¾¦¼¾§º½¦º¿¥»¾¦º½§»»§º¾£¹»£»¾¦¹¹¨½¿¤¿¾¥»¼¦¸»¦»¿¦»¼§»À¥»»£¹¼¥¹»£¼¾§¸º£·¼¥»½¹¼¢¹»¥»½¥¾¾£·»¦·¹¥¸»¢·º¢»º º»£·¹¢·¼ ºº¢¶»¤¶·¤¹» ¶»¢¹¹¡µ»¤·¹§µº¡¹·£¶¼¥µ»¡º»¤·»¡·¶¦¹»¤¶¼¥·º£´·¢·º¢¶¸¢¹º ¶»¦¸¼¡··µ¸£³º»¸ µ¸¤³·£´·³¸¢¶¶¡³¶¢µº ··£´· µ·´»³º³³´¶²ºµ·£µ··´¡µ´¶¶¡µ¶¡¯¶³·³·³·´¶£²º ±¹·³ ¶³·µ³µ°µ ³¶£¶µ³µ²³·²³µ³µ ³³³³¯µ°µ´´°²¯µ³²°´²±³±¯´³³²¯­³²³°²´´ °±²¶°´±±°±³¯²°°³¬²¬¯¯±­z|{|  ¡¡ ¡£ ¡¡£ £¡¡¥¢¡¡ ¡¢¢¡  ¡£¢£ £¡£¢¢¡¡¥¢£ ¤ ¦££££¡¢¥¢£ ¢¥£¢¥¢££¥¡£¤£¡§¢£¡¦£¥¡£¥¤¡§¢§¥¦£¨¡£ §¤©£¦¤¥¢§¥¥¤§¢§§¦¦¦¢¨¤§¡¥¥§¥§§ª¦¦¨©¥©¦ª¥ª¥¦¤ª¡§§¨©«¨©¤§§«§«£©¥§§«¦¨§ª¢©¦©§¥£§¤ª©«ª«§­¥©«¬§«¤©ª¬¨«ª«§«¦¬§¦¢¢|qz[gFU?iM:_K:UB5WD:OD5Q?3O??KD:QB5QBBOF5OD5OD5KB5OB0UD:QD8M?5OB3MD8MD0Q=3OD:KD5QD0QD?OI?MM:OQ5OF5QD3OI5MD8UQ?]fUYdnw|³ÄÊ£Ò¨Ùªß¯á£²ä¤¹è¥ºë¦»ï¦¹ì£½é£¾íª½æ£ºã¢¸àµÜ²Ë«®~ £qfdd]d|gdkrx¦w·|µw¸º½´À É¨Ì­Û±ßª¶ä¬½ëµ¾ò·ÅõµÈö´Êø´Ìù³Íú¶ÌúºÍúµÎú·Ïú¶Ìú³Ìú³Ìú¯Êú«Èò¨Çò¦Âð Ãê¾é»æ»â¹æµãµâ·àµÞ´âµâ´ä·ä¸æ¶è¡»è¥»ïª¾ñ©Àô®Ãù±Ãú±Çù¶Ëú¹Ëú¸Îú»Îú·Ðú·Ñú¸Òø·Ïú¸Îú¸ÒúµÐú´Ïù³Î÷³Éô¬Æó©Äê¤Âè£¾ä ¹Ý¸Ú³Û²Õ²Ó©Ó¬Ô°Õ©Ø®Ö­Ü²à³æ·é¡»î¥Àô©Áö­Æú´ÇúµËú¹Îú»Ñú»Òú»ÔúÃÓú½Õú»Õú¾Óú½Ðú»Ïú´Ðø³Êó°Èí«Ãî¦Äê ½å¾à·Ý¶Ø´Ó²Ï°Ç©È¨Ã¤Â¡¾·²z©x¡t¢tqndfifbin|¯¾ÃÃÄÃ¥Â¡ÁÁ£ÃÀ¼µ´©z¤xodY|oMq_?nUBdQ:YK?]D:YK:UD:UF:SK8OD:SB:UF5SF:QF=UK:QF=SD5SM8Q?:WF?S?:SM=SF8UF?YK:OI5WM8SMFUO:YMB]MBUMB]Q:WSK_]Wb~|~²¤µ­»·º¡¸·¹½»¸¸¹·¾º¸ ¸¹ º¸¸º¥ºº¢»»¡·º£¸¼¹¹¸º»½ ¸»»¹¸º»¸¹» »º ·»»»º¸ººº» »·¡·¹¡º¸ ·»¢º·¢º» ¸»¤º»¹¹º¸¦¼½»¸¸» »» ·»·º¡·¹£»»¸»¢¸»¡½¹¹º£¹»¤¸»º¹¢¶½¢¸¹»º·»¤¹· »¹¡¸¸¶º£¹¸ »½£µ· ·»¡ºº ¹¸¢ºº¹¸ ¸¸»¸¢»»¹··¸¹»¢····¢·¹·º¡µ¸·¶·¸¢·¸´·¶º£µ¸¡¹³¡¸¹ ¶·³¶µ·¸¸¡··¡¸º¸º¢¹º·¸¢µ¸¡µ¶··¢¶·µ¸·¸ º¶¶·¶¸¡¸¸µ¸º···µ³³³´µ¶¸ µ·¶´²µ·´³¸²µ³·¶µ³µµ´³µ³µ²µ³³µ´°·¶µ³·´³µ· ³µµ²³³³´µ³³´´³°´´³±³´°¯¯´³°±´±´³³±³±°±²²´°°®®±²³µ±¯²±²°²²³³±²¬®¯°°°°±®­°³¯¯°°­®°²¯¬²®®³²´°®¯®°²¯°­¬¬±°®­®ª®¬«¬¬¬°­¬¯­¬¯«¬««¬¯¬°¬¬¬®­®¬¬¬¬¬¯¬«©­¯®­¬««¬¬©©¬­¬®©«­«£¢¥ £¡  ¢¡£  £¡£¢¢¥¥¢¥  £¡¡¢¡¥¥¤¤¤¡¤ ¤¢¢  ¤£ ¤¥ ¦¢ ¢§¤§¢¢£¦¨ ££¡¡¢¤¨££ ¤ ¨¥¥¤£¤¤¥¥¥§¦¨¥¦£¤¢¨¦§¦¦¥¬¦§¦¦¢«¡§©©¦¨§«¤§¨¨¤©©§¤«¦§¦¨¦§¦ª§«¬¨¦«¦¨ª¨«¬ª¨¦¨§«§¨¬ª¦¨§ª§©¥«¦¬¬©««§ª¨§¨¨¥¬§¬§«¨¬¬¨¬¬ª¬¨¬¬¬§ª¨¬¬¨¨¬¨­¬¬¬ª«­­¬ª««¯¬­«©¬°¬¬­¬©¬®­¬¬¨¬ª¨±®¬¯¬©¯°¬¬ª±¬°¬¯¬­¬¯«¬¬±®¬¬¬©³®³®­®®°­ª±±³³±­°®®±®¬¯­³¬¬£­¢¢tflU[KqWDfSK_OF`SBYMI]MBWSKQSB]OD_SI]SKUOB_Q?UQF[Q=]MF[ODSF?WOIYMKUO?[QIYODYSF`QBUQQUSK[WI_UI_Q?]OFUSK[SK]_Qdq`irw¥¾Ê ÑªÛ¬ß¤³â£´æ§¶ê©¸î¬»î­Áñ¬Áï¬Áí¬Àï¬Áí¬¾ê¬Àç£·Òµ·®°£¤uklifirr¡{ª²³¹½¢Ë©ÓªÐ­Ô°Ó¯Û¡·à«ºè¬½ð¹Âö¸ÅúÁÌúÂÒúÂÓúÄÔúÆÖúÃÙúÅÚúÃØúÃÙúÁÙúÁÖúÅ×ú¼Ôú¾Õú·Õú³Ïú´Êú¯Íù¬Êø©Èô¦Æñ¦Âð¤Áí£Âí¾ë½ê¾æ¾ç ¼ê¢¾î¤¿ï¤¿ï§Áñ¬Áô­Äô±Å÷³Ìú¸ÊúºËú»Íú¼Òú½Ñú·Ñú³Òú´ÐúµÒúµÓú»Óú¾Òú¹ÕúºÑú»Õú·Íø²Ìô¯Çñ«Èî¨Áê¦¾ä½ã¸à·Ý·Ü²Ü³Ü¶Û³ã·æ·ç¤½ï¨ÀôªÅø²Éú·ËúºÍú¾ÓúÁÕúÆÙúÃÙúÄ×úÆÜúÈÞúÉÝúÈÜúÆÝúÈÙúÄÕúÁÙú»×ú¼Ðú´Î÷³Íô³Èó®Çî©Æì¨Áç¦Àã£¼ß»Ø´Ó·Í°Ç¬Ã¬Å§¼¤¸±³~¯¯®~¬w©ror r¢{x§¶ÁÆ¥È§Ë«Ç¥Æ¦Ç¦È¦Ç¦Ä¤Á¢¾¡·³­¤zob|_xnOzbKi]OiUKfQIbUI]SMdSK_YO[SD[QK[QB]QIYSF`WM[QO]QK]WFWSM]QFWSM[[I_OK]SK[UK]SIfYK[YM_UD_WKf`O]WDfYK_[Og`Ukwox·¥·¢°»¤»À§¼¾¤Áº¤¹½¤½½¥¾¾§»À¦¾¾¨¾¿¨½¾¥¾¼¨¿¿¨¾Á©ÀÁ¦¿Á©À¾¨¿Ã¨¾½¦Â¿¦½¾¤¼¿¨Á¾¦»Ã¦¿Â§¿¾¨¿¿§¿¼¦¾À¦¼¿¥¾»¤¾½§¼Á§¾Ã¥¿¿¦¾À¨»¾¦¿¿§»À¬¾Á¡Á¼¦¿À¨¾Á¨¼¿¦¾½¦½¾¨¼Á¥¾¿¬¼Á¨¾½¨ÂÃ¨¾¿¬¾Áª½¼©¼Âª¿Á§¾À§¼Á¨¿½§¾¾¤¾¿¥ÁÀ©¾¾¢¼º©¹¾§»½©À¿¦¼¼£½½§¿½¨¾¿¤½½¦À¼¨¾¾¨½¾¦»¾¨½½§»½¤¼½§¼»¨½¾¤¾À¥½¿§¼¼¨½¿§¼½¦º½¥¼»¥»¾¥»½¦¼¿¨»½¤»¼¤»¿¥»¿¦¾¾¤¼½¥½½§»»§º½¢¼¾¥½»¤¾¾£»½¤»¼§½¼¦½½¨º»¦º¼£¼»£¹¹£·»¡»»§º¾¤»»¡¹¼¤»¼¤¶»¥»»¢»½£º¾¤¼» º»¡¹¹¹¼£»¼¡º¶¶º¤ºº¡·º¡¹¹¤¸º¢·¼¥·¹¢ºº¤»¹ µ»¡ºº¤¸¹¥·¸ ·º·»¢º¸¹º¡·¹¢·¸£»¶ ·¹¤µ»¸¸¡¸¹ µ¶·¶¡¶¹¡·¶¶¶º¹ ¶·£º¶·¶¡·º¢¹¸¡¶¹µ¸£¸·¶·¡µµ ´¸¶·£¹µµ¶¶³ ´·³µ¶·´³£·´·²¶¶³²³´¶¶´· ¶¶¶µ·´¯µ³³²³°³³² µ³±´´±µ²²³³³³µ³±²²°±³³³³³²²µ°²µ²µ´²¯±²³¯±²³³³³®­²|z~~¡  ¡ ¡ ¡¡¡¡¡¢¡¡£ ¡¡¢¡¡¡¡¡¢¡¡¢£¢¢¢ ¡¤ ¢¡£¡££¢¡¤£¡¢¥¢££¤¢¤ ¦¥¢¢  £¡ ¥¢£¥¤£¥¦¡¡¡¥¥¦¢£¢¥¢©¡¥¦¤¢¥£§¤§¢¦¦¤¢¥¡§¥¨£§£¦¦§§§£¨¤§©§¢¨¥«££§¦£©¦¦¦«¤§©ª¤©¦©¨©¥¨¦«¥¬§©§«¦¨©©¦«ª§¦¨¤ª«ª¨ª«§§­¬©¬«¤§ª©©«©¬«©«¬§©¥|kt]`BuM?gI:[I:U?5QD8MD:MD5Q:8QD5ID8MF5MD5M?5MB5K?3ID:Q?3MD3MD:MB3MF:OD8KB5SD5MD5Q?8QI=OF:OD5QI:QD5OI8UD8OM?UUI]gY`tr¥¼ÈÎ¥Ô¨Û®à ±ß´â£µé¦·ë¥ºí¥¼ë¥»è¦½ç¤¼å¦ºã¸×µ½®»{¡¯u¦nkgfdd¡lq u¥|³»¿Ã¤Æ§É§Õ¬Ñ²Û£´Ý¤µà¬»æ¬Àî·ÁøºÆúÁÌú¿ÏúÂÖúÆÔúÈÚúÃØúÂÙúÃØú½ÕúÂÖúÃÓú»Óú¸Óú·Ðú·Ìú³Ìú²Êú®Ê÷¬Êú¬Åö¥Æõ Åð¢ÄïÁì¾é»ç»èºê»ê·ì»é »î£½í§¾î§Áô©Áö­Å÷±Èú´ÊúµÊú¸Ïú·Óú¬Îú§ÐúªÎú°Îú±Ïú¶Îú¸Ðú³Ñú³Îú¶Ìù³Çô­Èñ©Áí¡Áê£¾ä¸â¶Ýµß²Ü³Û­Û²Ý¯ß³è·é¸ð¦Áô¬Âú³Çú²Êú»Ïú»Îú¾Óú¸Òú¾Òú½ÓúÁÔúÃÓúÆØúÇ×úÄÛúÅÛúÃØúÀÖúºÖúµÏú´Ì÷¯Êó®Êò¬Äð©Ãë©Áë¥»è¢»âºá·Ý³Ö­Ò­Ð«Á¨Á¤¶ ·|±|³|°z¬|«z§w£qrrq£q©x©w¬»ÁÄÃ Ä¡Á¢Ä¡Ã¡Æ Á»¸´¯¦¤ul[xOwbIo[FdM:_K=_D3[I:OIBUI?YK?UIBQB3WB5QM?QD:SK8QI=OD:UF=QI8QF8UD:QM?WF=UD5SF:QI=SF?UI?SM?UF=UO=UK?WK:WMD]MD_fYnz­³ª¶¡±· ·»¹³·»¶¸¸·»¼µº¸¸ ··¡¸¸ º» »¸¸º¹º¸»º··»¦»» ¹¸£¸º»¹£º¸ ¹º¹¹£»º¦·¹¼··¹ ¹¹¡¸·¡»¹º¸º·¢º½£»¾ »¸¹·¡»¾¢»¸¡»¼·¹ »¹·¸»¹¡¶º£»¹£º½¡¾»¡º¹¡·»¡¹» ¸»ºº¢ºº¢·º º» ¸º¤»¸»·¢··º»¡»·¡´¹¥»¸¸¹ ºº¶¸¸¹¸»£º»¤···¸ ·»¸·¹¹¶· ¶¸¡¶¸·º ·µ¶»··µ··· µ·¡º·¢·µ·µ¶º¸¸·¶¸·¸»¡´º¡··´·¹·¡···´·¸¤··¸¹¡¹µ··¡´³´·£µµ ·¶³··¶´³·³³·³´µ³··°³¶µµ¶·³³³´´³µ¶²³µ´µ·´µ²²µ·´´´³¶²·¶³´³²´µµ´³³³±³°´²³²µ³³°²³²³²±¯±°±³°²°¯®³³²³³³³²³±²²²°¯±³²®±µ´¬°±²²¬°°°²²±¯°®±®­²±±¬°±®®³°®¬¯°¯®­±°®®­®¬­®¬­­­«©­°«¬®­®°­°¬««¬®ª­°©­®««®­­¬­«®¬¬ª­¬¬¬­««©¬«¬©««¨°¬ ¢¢¡ ¤££¡¢£ ¡¡ ¢¡¥¡¤ ¡¤ £¢¤¡¡¡ ¢¢¢¤¥¢¥ ¦¡¤£¡¡¢¢¨£¢¨¤£¡¥§¡¥¥¦¡©£¤£¦ ¤¤¤ §¨¢¦¦¦¤ª£§¥¨¦¦¢¦¢¨¥¨¤¦£§¤§£§¦ª§¦¦§¨¨©§©¤¦¥©¥©¢ª¨¤§¨¥ª«©¤«¥¨¦©§ª¨©§¬¥¬ ª§¥¥«¦¬¨§§¨¨¬¦­§¨¥¬§ª­¬¨­©¯¬«¥©©­§¨¨¬¨ª¨ª««§ª¨°ªª§­¬¬©­ª¯¬¨ª¬«°©§¬®©­¨¯¬­¬­«­­¬­ª¬­¬®¬­ª°¬¬¬«­²®®¬®«²°³¬®­°¬¬­¬®¯¯­¬²¬­¬®¯°¬®­³®°­²¯°®®®°¬³¯³­°¬°¨¢ln]dMzQFnSFdUBdKD]OIWSF]FB]OIYSFYOF_MFYSD[KB[KI[QBQOIYK=WO?WOM[Q:[QD[MD_KB]QFYMB[MDYSF[SD[SI[OF_MK[UF_SD[[M__Sglfk~«ÁÎÕª×¡°â¥°â¥¶å¥»ì«·ð«¿ñ¬Ãñ®Âð­¿í¨Àí¬Áì«¾ã£½Õ¹Õ´Ê©¿¨³~¬x¨z°{²¸»»»¸¼¢¿¤Æ¥ÍªÓ°Ø¡®ß¤¹â©¼ê±¿î³Áë³¿õ¸ÊúÁÎúÃÐúÈÖúËØúÊÜúËÝúËàúÎâúÌÝúÈßúÃÝúÈÝúÅÛúÅØú»Öú»ÔúºÒú¹Òú¸ÐúµÍú¶Ñú³ÌúµÌú­Íú¯Ì÷¬Éò¥Çð¥Äò¥Äï¤Áð¡¿ò¨Âò¦Àò©ÃôªÃô¬Äõ®Çù±ÅúµÈú¶Íú»Îú¾ÒúÁÕú¾ÖúºÙú³Ùú³ÕúµÒú¼Õú¾ØúÁ×ú»Õú¼Òú¸Óù¶Î÷²Ëô¬Èï§Èì¤Âé¦¾å ¼ä·â¶ã·â¶á¹ì£»í©Àô¬Ãú±ÈúµÍú¹Ìú¸Òú½Ñú¼Öú¾ÖúÁÕú¼ÙúÀÕúÂÚúÆÛúÊÙúÉàúÐÜúÌßúÍàúÆÝúÆÛú¿Ûú¼ÕúºÐú´Î÷³Ê÷µÊô­Æò¬Åô¯Ãí«ÁêªÁé¤»ä »ß·Õ³Ó­Í¯Ë«Ç§È¤Â¥¼¢» ¼·¸¶³®©«¯³¾À É¤Ê§Ê©ÊªÊªÇ¦È¦Ê¨É§Ä¤Á »¶³©tn{[qUu`Mq]Ik]MdUKbKK]OM_SI]UFbQO`SB`SI[OIdMF[UD_SK_OI]SF]QK_QF]SDbSI]OK_OKWYD`OK`UD`QMYUQ`SI`]K_SK`UKdWMfYKibWluzu¦µ ¬¼¦¶¿§¹¼¢¹»¢ºÃ¤»¾¦¼¼¡¾¾¦¿¿¦½¿¡»¾ª¼¿¢½¾¥À¾¢¿¿¦¾»§¼¾¥¿¾©»¾¦À¼©½¾§¾¿§ÁÀªÁ¼£¾¿¤¼À§¾¿¨¼À¢¾¾¤¾Á§½¾§Á¼§ÁÁ§¿Á©¼À¥¾Á«¼À§¾À¤Á»ª»À©½¿§Â¿§ÁÁ¥½¾§À½§¼¼¦»¾¥½¼§ÀÁª¼½¬½Â¨Á¿¦½Á§¾À¬Á¾¥À½¦¼¿¨½¿¨»¾¥¾º¤½À¦¼¿§¾½¢¼½©»¿¦¼¼¨½¼¨¾Á¦¾À¥½½¤¿»ª¾½¤½¾£½¼§º¾¤½»¥¾Ã¦»¼¥»¼§¾º¦½¿¨»¾¥¿¾¨¹¾§¼»¤½»¦½¼¦¼»¦¼½¤¼¿¤¾½¥¾»¦¹¼£ºÀ¦¼¿¥½¾¦¼º¢¿½¤¼Á¥º» ¼º£¿¼¦¾¼¥¿»¦¹½©»¾¦»»¥¼»¡¹»£·»£»»¥»»£¹º¦»»¤»º»¸¢¸º¢·»¤¼»¦»º¢¸»£¼·¡º¸¥»»¥¸¼¢»»£»»¢º¸¦»»¥»»¤·¸¡¹¸£·º£·¼¥½·º»¢·º¥»º¡º¹¡¸¹¢¸¹ ¹¸¤·¶¢¶¸ ·¹ ºµ¡¶·¹´ ·¸ ·· »³··¶·¡¶³ ´´¶·¡¶·¢·¶¡·· ·¶·· ´¸¢¶µ¶¶ ±´·µµ¶ µ· ···³µµ¶³¸³±µ¢³³¶³¡´µ²·µµ´´³·²µ´´±±µ³³¶³µ·²´³ ³¶³´±´µ²³³´¶´´¡³±¶´³´±³°³³³³¯¶³¶µ°±´¯²°¶´°³°³±¯°¯±­³´³|{¡¡¡ ££ ¡£ £¡  £ £££¡ ¡¡¢¢¦¡ ¢¢ ¤¥¤¥¥ ¤¤¢¢¢¥¡¤¤¡¥¢¥§¡££¤¡¢¦¢¥£¤¦¢¦ ¤¥¤¢§¡£¡§¤§£¥£¥¥£¦¥¤¤ª¥£¤¤¢¦¡©¦§¡§¢«¤¥£«¦¨¥§¢¤¥¥¦§¥¨§©¥¦¦¦£§§§¦©¡¨§¨¤¨§©¬ª§ª©ª¥¬©¦ªª§¬§«ªª§¬§¦§«§­©¨§¬§¬¦¬§¨¡¨¨©«ªª¬¬ª©©©ª¡§z[_FW?gI=[F5[K=SD:QB5OB8OI:SF5QD5MI8SB5MB:I?3KF8QI:QD:I=3QD8KF5OD8OD5OD8QD=MB5KD:ID8MF:MF:SK8Q?0UF=OD5SD5QO=Y_Q_n]fuu®ÁÌÒ£Õ«Ú­Ü±ã£¶è£·ì£·ë¤»ì©¾î¨¾ë¥¾æ¢¾â¡·ß·Ù²Ö¬É«Ã¡¹·|²x²´¹½¾Æ¡À¤Æ¡ËªÔ©Õ¬Ø±Û³Ý¤µâ¨¹í«¹ðª¾ô·Å÷·Çù»Êú¾ÏúÆÓúÄÓúÄØúÈÙúÈØúÊÚúÆÛúÈÜúÆÜúÃÚúÀÖú½Õú¸Óú³Ðú±Ëú±Íú°Ìù¯Êú°Êù­Êú¬Èú®Èö¬Ä÷©Æö©Ãó§Äï Âð¤Áð Àî¡Áð¡¼ñ¤Âô£Àö¨Áô§Á÷®Ãú²Æú¸Êú·Êú¹Ëú¾ÓúÂÕúÃÕú·Ùú»ÛúºÖú½Ûú»Øú¾Øú¸Óú·Óú²Ìú´Ìö­Çð£Áí¥Àå¼â¸Þ³Ý±Ûµà²ß±æ·ï§¼ó§¾ó°Ãø³ÅúµÌú´ËúµÎú·Ðú·Ëú·ÑúµÎú´Ðú¸Ñú¾Òú½ÔúÁØúÆÖúÇÙúÈÚúÆÚúÄÖú¾ÖúºÒú´Ïù³Îö±Éö¬Æó§Ãò¨Ãï­¿íªÁë¥½æ¡»à·ß²Û³Õ³Ó®Î©Ë¨Å¥Æ£À¡¼ ½¹¹¹¯²·~²|³³·»ÁÃÇÈ¡Ç¤Ç¢Ä¡ÆÇ¤Ã¤¾¹··ª{¡ttd|SxnKnYDiUD`Q?]F:YF:QD8QI=OI:SI:SI=QI5UIBQI=QI8SI=QD:QK5SI:QI=MF:QI8UI=SD=OI5UMBQI=YIBWK8UIDYI:UM?WO8WM?WKBWYI`gWi«³¬·³·²··º»¼¡¹»º¸·º¡¹¸¸»º··»ºº·½¢¸·¶·¸¹¢´¾¹¸¹· ¸º¹»£¸»¢º· ¸¹·º£¹º ¸··º¢ººº¹¡¹¸¢»»£¼½£»½¡¼º º¸»»¤º»¹¹»º ¹¿¢»»¤¾»¡»»¹¹¶·¡¸¹ ¹¹£»»·» ¹º¡·· ¸¸¢·»¢·¸¹¹ ·» ¹¹·µ·»¡¹ºµ¹¡µ¹··¡·¸·½¡¸»¹··¹·º£··¶· µ» ·¸¸·¶º·¸»¸··¸¸¸·¢µ¸¡µ·µ¸ ¸»¡¹·¶¹¡µº·¸··¡¹»¸µ·· ·º ¶¸£¸¸·¶µ¸¡µ·¡·· ·»·¸¶µµ··¶¸¶´¸µµ¶···¶µµµ³¸µ·µµ´µ·µ¶µ·³µ³³¸µ³³´µ³´´µµ ··µ´´´´´µ·²¶³µ·³³´²¶µ´´³²´µ¶²³³²±°²µ³³³µ´³²³³³´°±±²°°²¬´°²³±±²®°²±´±¯¯¯®¯²­®¯¯±²®®¬²­²±¯®­°°®³®¯®°¯­¬®¯®­­¬®®¯®­­°°¬°¯®°°®¬®¬±°­®°¯¬­°±®¬²®¬®­«­«¬«ª¬¬®­¬«¬¬«®¯¬«®©¬­¯­«©¬««ª¯©  ¢ ¡ ¡¤ ¢ ¡¡¢¡  ¡    £¡¡ ¢¤ ¢¡¢¢¡ £ ¤¢¤ ¡¦¢§¡¥££¢¤¡¤ £££¢¢¡ ¥¥§¦§ ¢¢¡£¤ §¢£¤¥¢¦¡¨¥¤ §¦¨£¡¥¨¥§£¨¡§ ¦¡¨§¨§©¦¦¢©¨©¥¨£©¢©¦ª¨«¤¦§¦§©¥§§¬¦¥¤«§ª¤©§«§¨©¬¦©¦¤©¨¥ª§ª§©¨«¦¬«©£§©®©«¥­¥¬©­¨¬§¬§«§¬¥ª¨¨««ª®¦­¬®§¬ª®¬««¬©±¬¨­°©®¨¬¬°¬­¨«­®«±­³¨¬ª¬«²¯­­¬¬­¨¯®±±­¯¯®¯®³¯ª¬±­¬®°¬®¯±©¬¯²¬°­°¬¯¬´®±«²¯¯¬®®¯¬³¨±¯¯®¬¨« £giS`QoUFkODbQK[QB_QB[OFWS?WOD_SDYQD_KBWMBUMDSKB]OI]ODYMF]QKWOBYQD]KBWUK_OKYOBYSF]SIYQFWUM]QD[O=_UI[QI]WB_UMb`Yixir»ÌÕ¨Ú¢¯Û£³à ²æ§¶ë¨»î©¾ñ¯Àñ°Ãñ³Âó°Èï¬Âæ©Åçª¹ß¤¼à¸Õ´Ë°Æ­Å©Ã©Æ¥Ä§Ã§Å¥Å¨ÈªÌ¬È­Ì®Ó±Ö£²Ü¤µä¨¹é¬¼î¬¾î²Âò¸Äö¸Í÷»Ìú½Ëú¿ÓúÆÒúÇÖúÉÓúÎÚúÍßúÍßúÐáúÐâúÏâúËàúÈàúÆÝúÄÖú»Ùú¹ÖúµÍú³Ðú²Ðú°Îú³ÎúµÌú³Îú¯Îú±Îú³Ëú±Íú­ÌöªÊö©ÇóªÇô¬Æö¬ÄöªÆö¬Æø®Êù±ËúµÊú»Ëú¹ÐúÁÒúÄÑúÃÖúÉÜúÍÝúÌáúÍãúÌáúÊæúÇáúÃÝú¿Ùú¿Öú»Õú¹Ð÷°Éó¯Æð©Åê£Áê¢»ç ¾ã ¼à¡·ä¢¸é¢ºï¬¿õ±¿ø³ÈúºÊú¼Ïú¹ÒúºÐú¼Ôú¹Óú·Òú·Õú·Òú¸Õú¼Óú¿ÕúÃ×úÅÙúÇØúÌßúÏÝúÇÜúÆÜúÃØú¾×ú»Õú·Ðú·Îö±Èô®Éò¯Ãò¯Æï­Åï¬Âè§Áç¡½æ¤¹æ¡ºÛµÕ°Ö³Ò³Í°Ë©Æ¬Ã¥Â¥Á¤¾¢¾£º¢¸¹¹¸½Ã¢Ã Ç Ê¦Ì¥Í©Î§Î­Ì¨Ê§ÌªË¨Ç§Á¤»¢¶µ¯¥~rbqY{fQubOf[KgWIdOK[SD]OI_QF_OM_OM`SD]QM[QF[SM`OKYWK_OF[SFWQK]QDdWB]UK]SF_QB`YK[YK`SF`WK[QObYKbSK`WMbWIbUKbWOgdbo¦¹£ª¼¤±¼§½½¥»»¤¿Â§¾¾¥¾¾¤¿½¤»¿£¾¾¨¾»¥¼Àª¼À¢¾¿¤¼¾£À½¥»Á¨¼¾£»¼£Á¿£½¿¦¾»ª¿¿§»¿¨¿Â£½¿¥¿Á¦¾¾§¾Á¨½Á¨¾½¥¿Ã¨ÁÂª½Áª¾À©½À¤¾Á¦À¿§¿¿¨À¼¤ÁÁ¨½À§Á¾©ÀÀ¨¾¾¦¾À¦¾¼¨¾¿¥¾Á©ÀÁ¦¾Á¦ÂÀ«¾½£»¾§¾¾§¼¼§¿¾¨¼Á§¾¾ ¾À§¼½¦¿¾¥¼½¨½¾§¾»¦¾¾ ¾½§½¾§¼¾§½½¥¾¼¨¾¼¢¿¿§»»§»¼£¾¾¨»À¤¾»§¿¼¤»¾¦»»¥¼½¦½¼¤½¼¥¼¾¥¼¿¦»»£¼¼¦¼º¥¸¼§»¾§½¾¢¼º¤¼º£¼À¤»»¦À»¦¹»¤¼½¦º»¢¿½§½º¥¹º¤»¾©½¸¤¼º¥¼»¨º½¥»À§º¹¡¸»¥·» ¼¸¤»¼¤·¹¡»»£¹»£º¹¡º»¢¾»¥··£»·¢»¹¤·º¦¹º§¹»£º»£ºº¢½»¡¶»¡¹»¡º»¤»º¤¼¸¸·£¸»¤½¹ »· ¶¸§¹¹¢¸¶¥¹»·¼¡·¸¤¹º¢¸¶¢··¡º´ ¶· ¹µ ·³³¶·µ·µ·· ³¶ ¹¸·¶ ¶·³´¡¸´´¶ ´²µµ¡µ··¶¹·¡±³¡¶´´³ ¶³´µµ¶·´³´µ³µ´¯±·³µ´³³¶²¶³³´µ³·¶´±³³µ·³´´³²³ ³´³®´³³¶±³³³¯°µ³¶²­²³¯±µ¯² ²´³°µ±±®²²³®¯±±²±®°|~~¡   ¡    ¡ ¡ ¥ £¡¡¡¢¡¡¡£¢¡¡¢£¡¡¢¡ ¥¡¢¡£¡¥£¡¦ ¥¡¡£¡¦¢£¡§ ¢¢¤¡¥¢££¢¥¦¢¥¥§¢¢¡££¦¢¦£¥¢£¢¤¥©¤¦£¦¦¦£¥£§¦££¨£©¥¥£¤¦©¥¨¤§¥¨£§§¨ª¨£¤¤£¥«©§£ª©ª¦¨§¨§¬¨ª§¨¨¬§«£«««¨®¨¬§¬ª¨©¬¨«§«§«§©©§¤®§©¨©¦©©§©ª ¤x_`F~UBgMB_D0SD:OD:QD3MI8QD:Q?0QI8Q?5MI5QD3MBBOD5KF3OD5KF5OD-QD:O?5KD=QF5OB5Q=5MD5QI8OD:QF:QI:S?3MB:OM5QI:SM:Y[O]tgk¸ÊÒ¡Ó§Ù©Þ ³ã²ä¥´ç¦ºë§»ï¬¾ìª¿ðª¾í§»â¢»â¸Ý ·ØµÐ°Í®Ê§É§Ç¦Ê¥Ê¨Î¦Æ¨Æ¦Ç©È§Å¦Î©Ò®Ù´Þ¡µå¨·ç¬¹ê«¾î¯¾ò°Ã÷µÇùºÈú·ÊúºËú½ÌúÂÎúÀÑúÄÒúÈÒúÇÕúÌØúÈÙúÈÚúÇÛúÄÙú¿Õú¹Óú·Òú°Ïù±Èö¬Çù¬É÷¬Æù¬Éù©Çú«Èú¬ÅøªÊø¬Åù¬Äù¬Åõ¦Ãõ§Ãó¢Âò¢¿ò¦Âó¥Àô§Ãö¬Ãù­Åù¯Éú¶Éú·Ëú¸Ïú½ÐúÁÒúÇÕúÇÝúÍßúÌàúÌàúÈÞúÄÞúÁÜú½Õú»ÐúµÎø´Ëô­Çë¡Áê£»ã»ß¶ß°à²à²ã²è¢¶ï¤¼÷¬Áú³Çú²Çú´ËúµËú·Îú²Îú³Ìú®Îú°Îú­Êú²Îú°ÎúµÌú¶ÎúºÎúÁÐúÁÔúÁÔú¿Óú¹Óú·Ðú³Îù·Ëö°Éõ¬Èó©Åî«Áí¥Áê£½è¢»æ¤»è ºá¸Ýµß°Ø®Õ¯ÎªÐ¨Ê¨Ì¤Ç¡Æ¢Ä¡Á¼ ¼»¹º¸µµ»¿Æ¡É¤Æ¤È¤Ò£Ì£Æ£Ê¢È§Å¥Ä¡»·³¬~©x£ngWkKqbFlY8dI?`K=WI:UD5WI=QI0WD:OI8QB:SD8QK8KD8QK:UM:MI:UI5QD5SD:OB8UF=QM=UI8WI5QIBSF8UI:UM=UI=UI?SO?SK?YI:]QDYYMbonq³£·ª¹ ´¼¡¹»¶º½¹ ºº¢»¸ ¸»ºº¹··º¸¸»¼¸¹¢º¸»¹·»¢º½¢¸··º ¹¸»º¢º»£¹º·º¡»»¡µº··ºº¡¸º·º º»£º¾ ¸¸£¾¸º¹ º¼¡·¼»¹¡ºº ¸» »¹ºº¹·¡º»¡¹·µº¡»¹¸·½»¢»·¸º¸º»¾£»½¸¹·»¡¼·¸» ¸»¸¹ ·º»·¸º¶¸»»¹¹·¸¶¹ ¸¸¸¸···º·»·³·¸·¶ ·¸···»£··º¹µº´¶¹·¢¸·¸¸·¸·¸¸··¶···¸·¸¶µµ¶¹¸¤·¸ ¶· ¸·¸»¸¸¤µ¸¶·¢³µ ´¶¶·²´³¸·¶¸·µ·µµ¹·µµ³¶µ··µµ²·³²¶¸³µ¶µ´³¶¶¸´¶µµ°·³·´·¶³´·±´¸´²¶¶²µ³³´ ´¶³µµµ·³²²°°°²³³²³²µ³®³²°¬²±®³°²³°³²±±³®²®°³¬¯±°®³¯²³¬¬³²®²¯°³®±¬°­¯°²®¬¬¬®¯®®®¯±°¬°®±¯«­®¯°­°­­°¬°¯¬¬¯­ª¯¬®¬®¬®¬¬«¬®°«®¬¬«¬¬¬®¬¬¬«­­«¬«©®«¬®¬­¬©¬¬¬­¡     £ £¤¡ ¡ ¤ ¢¢¤¡¤££¡¤¡¢ ¡¤¤¤¢ ¢¡¢£¡§¢¥¡£¤¢¡¥£ ¥¥¥¢¥¡¦¤£¤¥ ££ ¥§¡¤¢£¤©¦¨£¦¦¦£§¤¦£¥£¦¤¦£§£¨¥¦¦¥¦§¡¨¦¥¦«£¥¦©¤§¥«¨©¥«¢¦¦§§¨¤¨©¨¤§¥¬¤§¨¨¢¬¤¨ª©¨­¨©¨ª§«¬©¦©¨ª¥©¨ª¨¬¨ª§©ªª£©©¨¬¬§«¨©¬¬§¬¨©¬ª¨¬«¬¨«ª««¨¬®­¬§¬¬¬¬­¨®©¬¬«¨­¬ª¬®¬­¬¬­¬ª¬­¯¯¯«°¬¬¬²¬²«¯®®®¯¬±®­©²¬°®¬¬±®°¬¬®®­°¨¬«¯¬®¯¬­­¬±®¯«¬¦¬| bfOYDqQKiOKbSFYQKYS=[UD_OKUO?[ODWKBYODYKB[QKSIDYSB`OIYSKSQB[QISMDWKBWOFUOD]IKYOFWSKSMFYSB[QI]OI[OD]YKYQK[`Mdg_`uq«½Î£Ó¨Ö®à§®ä§·ç¨ºì¬»ï®½ð¯Áò³Åð²Åï±Ãð«Ãèª¿æ¬¼á¦»Ý¹Ü ·×µÖ¯Ö±Ö¯Ñ³Ð ­Ò¬Ó±×¬Ö³Ø³Ø ³Û¤¯à¦´ä¨¸é­»í­Áï¬Áï±Ãô¸ÆøºÈø¹Èú¾Êú»ÌúÁÏúÀÑúÁÒúÀÔúÉÓúÆÙúËÙúÊÚúËÙúÌÝúËÙúÉÛúÁÛú½ÕúºÓú·Ñú³Ëú¯Ìø¯Ìú±Ìú°Ìú³Íú¯Èú¯Ëú¬Êú³Íú³Èú°Èú®Êø­Êö¯Èö©Æö­Èö²Ãø®Éù°Æú±Éú·Ìú¼ÎúÁÊúÁÓúÃÕúÉÖúÌÜúÐáú×ãúÕçú×çúÓçúÌåúÅãúÃÜúÁÕú»Õú¶Íö²Ìñ«Æí¦¿è¢»ã·á¢¸ä¡ºç£¹ë§»ô®Áõ®Ã÷³Æú·Êú·Íú¸Îú¶Íú·Ñú³Òú³Îú±Ðú­Îú°Ìø³Íú³Ëø±Êú¶Îú·Îú¿ÐúÀÖúÀÐúÁÔú¼Òú·Òú¶Î÷¶Î÷³Êö³Èó°Åñ«Áî§Äëª¾é¥¾è¥¾æ£¼â¹à¹á¶Û´Õ±×®Õ°Í­Î¬Í§ËªÇ¤Æ«Ã§Á Â£Â£Ã¡Ã¤¿Á Å¤ÈªÌ§Ñ ¨Ò¬Î¬ÓªÒ°ÐªÓªÐ¬ÌªÇ§Ç¥À¡º¡·¯§~zdw[{gSo`MkYOiUF_QI`SK`QI[SB_QK]YD]MB]QF]SMYOF]QF`QOUO?_MD[QMWMF[SF_QF[UK[QI[UI[SK[OB_SI]WF[QI_UO`[ObUKbYKdUK_WObibq{­ ¸ ­À¨µÀ¨¼Á¨¼¿¦»Ã¨½¼¨À¾¥¾¿¤½½¢À½¦»¿¢½¾§¾¾¢»À¤½¼¤¾¼¤½¼©¼»£»¾£¼¿¦¾¾¨½¾¡¾¿¨¼¾¥¿¿¤À¿¥»¿¢¾À¦À¿ªº¾¨¾¿§ÀÀ«½À¦½¾¨ÁÂ¤¿À©½¿§¾¿¨¼À¨À¾§Á»¤½¾§¿¾¨¾À§ÀÀ¤¾¾¤¾¿«¿¿©º¾§¿¾¥¿Áª¼¿¬»¿¨¾¿ª¿¿¨¾¿¦»»©»¾¨¾¾§¾¿¨¾¿§½À¥½¾¥¼¿§¾¿¦¿º¦¼½§¾»¤¼»©»½¨»»§¼¾«½½ª¼¼¨À¾¢¼¾¥»»§½½¥½¼¦»½¥½¿¢¼¾£º¾§»º¦»¾§»¾¤»¼¢¼»¦¾½§»º£¼¹¥»½¤»·¤¼¼¤»»¥»À¦»¾§»¹¨¸¾¨¼¾¥»¾¥»¼¦¹¼¢º½¦»¸¤»¹»»¤¸¼¥¶¸ ¼º¤º»¥º¼¡º¹£¹»¥¹¹£º»¤¹·¤¶º¡¸º »º¤¹·¢¸¸ ¸»¦»¹ ¹º¥º·¤¸»¦¹¹£ºº¤»»¥··¤»¹¡·»¡¸º¡»º ·»¥¼¹¡¹¸¤·º¢¶·§»µ¸º£¶¶ ¹·£¹¶¢³µ ¶¶¶º··£·¶··£µ·¡·´³³ ´··µµ· ³³³´·´ ···³ µ·³º¶µµ·´¸µ³¸¶ ³µµ³ ±¶³¶³¶³µ²³²³ ³³¶µ³³³³·¶´³¯µµ³²²³² ³³ ²´³²³µ²²²³¶³±±µ³´²³³°±±³±³±´°µ±³²³³°²µ²³³±±±¯³¯²²±±~{~~¡¤¡ ¡ ¤¢¡¡ ¡£   £ ¤¢ ¡£¢¡ ¢¡¥ ¢¡¢¤¢¡¤¢¡ ££¡¡ ¢ ¥¤¥£¤£¡¥ ¢¤¦ ¢£§£¤£§¢¥£ ¦¥¤£¥¢¦£§¤¥¡£¤¤¤£¤¥¥¦¥§¥§¡¨¥¤¨¦¥¦ª¦¦£¦¥¨«©¥¤¥¤¥§§¤¨¦«§©¦©¨©¨¥¥©ª¨¨¨©«¨©ª¨¤¨¥«ª¨©¬¨ª¤©§ª¤ª§©¨ª¦««¬§¤ª«¨©§©¨¦k[[=zI?iD8SK5UD5UF5QI5OB5OI5OD0Q?5UF8KD3MI5KI3O?:KB5QF5MI8MB5SI5QD5I?5U?3ID5KD8MF3OI:MF=OD3QD:ID5OD=QM5QK:QM?W]W`~qg¦½ÆÏ£ÓªÛ¬à ²æ·æ¨µìªºî©¼î«¾îª¾î©¿ìª»é¢¾ß¡¶à ¶Ý»Þ·Û³Ù¯Ð²Ò®Ò®Ì¬Î­Ì¬Ñ«Õ¬Ù­Û³Û²Û£²á¥¶ã¢¸å©¸è¨ºí¬¾ð³Áò°ÁõµÃø·Äø·Çù¶Éú¹Çú¸Ìú»Íú¾ÎúÀÎúÃÑúÃÏúÁÑúÁ×ú¿Óú¿Ôú¸Îú´Ìù²Çù¬Éõ©Äó¨Ãó©Ãò¡Áô©Àó¤Äõ¦Ãö¨Âö§Ãö¦Æö©Ä÷¥Äö©Æò«Ãö§Æõ¥Ãô§Áó¦Àõ©ÁôªÁõ¯Áù±ÇúµÇúµÉúºÎú»ÒúÁÑúÄ×úË×úÎÜú×âúÖçúÌäúÊäúÁÜú¼×ú¸Ïú±Ìö®Äô«Ãì¡Àæºá·Þ¶Ü³à²ã²é¥¸ï¥¸ô¥Á÷¨Áø­Æù¯Èù¬Çù­Èú¬Íö§Æô«Èô¦Äò¤Éò¤Ãñ§Ãð¥Áò¥Äô©Âõ°ÃøµÈú¸Èú¸Ìú³Èø³Êô±Åñ­Äï­¾î«Áî§¾é¤ºè¤ºç»å·Û³ÝµÝ³Ú²Ø°Ó­Ø«Ó­Î«Î¥Ì§Ì¢Ê¤È£Á¢ÃÁ½ÀÁ»»Á¿Á È¡Ê¤Ì§Í¦Ì¦Î¦Ï¨Ì¬ÏªÌ¦È£Ã£Ä»¸³«z¦rn_uSu]Mf]?fQ=_O?SO:UD:SI=QF5M=:UF8SK:QD?QI:QI=SI5SI5QF=IF=UF8UK3KF?UF5OK:MD=UF:QK:MI:YD=SO=SF?UD?UD?SK?YMBWMDYMDYWK_rrq¬» °»´¼¸»·» ·º¼»¹¸¡·º¶··¶£·º¹· º¹µ····¼»¸·¸¡·¹·»¸¹¸»¸·¸º¢·º ¸º·º¸»¡¹»¡·¸»·¡·½¹»·»£¹»¸¹¡º½¡¹»¡º»¹¹¡»¸¡ºº¢º¸¢º¹¡¶·£·· ¸¹¡¸·£¸¹ »» ¶½£·ºº¸¤º»¸»¡¸»¸ºµº£·¼¡¸¹¢·º¡»¹ ·»£·»·¸¡·¹¡º·µ·»¸¶···¸»¡·¹£·º¡···¸·· ¹¸¸·¡³·¡¹···¶¹¸¸¸¸¢·¸·´µ¹ ¹¸··µ·µ¸´µ·µ¡µ¹¸¸¢··¸·µ¶µ·³¶·µ³¹´·µ··¸µµ³¸³³¶´µµ³´µµ³´³³³¶³¸µ´·³²·²¶³¸³·°´³µµ·°´³·¶¸±²·³³¸´¶·´´³µ·³³²³²²²²µ³²±±°°±²³®±±¯±³²²²²°²¯±²¯±´³²±¯°²®°¯±¯°®³°®®®°²±±²±­°²°²°°¯°®­³­²®­¯¬¯°®«®®±­©°±±¯°®°®°®¬¯®¬­¬®°®¬®­¬¬°­¬«­¬®««®®«­¬«ª­¬««­¬­¬®­¬««®­¨¬¬®¬®¨¬«©©¢   ¡¡¡¡¡¢ £  ¢¡¡¢¢¢ ¡¡¥¡¡  ¡ ££¥ ¥  ¦¤¡¢¢ ¤¤¢£¥¡¤¤£¡¤ ¤¢¥¡¥££¤¤¥£¡ ¦£ ¡£ £¤¥ §¤§£ £©¢§©¥¢¨¡£¦§¤¥¥¨¤§¦¥¥ª¥¤¨©¢ª¨¦§ª¡¨§§§§¥©¥¨¥§¦©¥¨§¨¨¨¥ ¨¥¥¬¥§©©¤ª¤¨¨ª¦¬§ª¥¦¨ª¥«¦¦©¥§¨©«¨©¦­«ª©¬§©«§©¬©¬¨¬¨¬«ª¬¬§ª¬¬««¨­­ª«¬¬¬¬¬©°©¬¬«¬¯§¬­¬ª­©¬®¬¬¯«°­¬¯®¬°®­©®®¬«¯°­¯¯¨¬¬­¬¯®¬¬¬©­ª±ª®ªª±³­«°°¬±³­°¯ª°­®ª©z¡b]F{QIkQD`QD_KDYSM[OKWM=QQFWMD[KBYSDYQFWOBYKDSOFYFB_UIYSISOBSMBSMIYSF[OBSSFUODUOF]SIUYF[KBYQDQSF]OF]SFWWK[WObfbgwt­¿ÌÕ§Ú¢«ã¦°ç¦·èªºï­½ï³¾ð±Áò²Ãó³Ãð³Æñ±Ãï­Ãçª¾å©¾å¨½ä¦ºß¢·Ù£·Ø¸Ø³Ù °Û¡³Ü ´Ü³Ú¤¶Ø ²Ý¥²á¡·â¢·é«¶ê¨ºë©¾ï¯¾ð¯Àï¬¿ð³Àó¶ÅõµÆùºÉú¸Çú¼Éú»Ìú½Ìú½Ðú¾ÌúÁÎúÂÒúÃÓúÅÐúÂÕúÁÐú¾ÐúµÎúµÌø²Èõ®Çô¬Çð«Ãò§Âò¤Ãó¨Ãô¦Ãö§Æõ©Áó¨Áô©Å÷¬Ãø©Éù¬Éø®Êú¬É÷«ÉöªÇø«Æö«Æõ¬ÄúµÈú¶Èú¹Ðú»Ìú¾ÔúÁÖúÅÕúÈÖúËÝúÔáúØâúØåúÕéúÌçúÆàú½×ú½Óú·Ðø°Êò²Æë§Àè»ä¹Þ´ã·æ´ç§·í©¼ó¯¾ö®Å÷®Åø±Éú³Êú­Íú¬Ê÷­ÎöªÆöªÈó§Åð¥Åñ§Äï¤Áë£Âë¦½ð©¾ò²Åô¶Áô¸ÂùºÇú¶ÆöµÆó¯Âð¯Àï¯¾í©¾ëª»í«¹ë¬·ç¤¸ã¶à³ßµÝ³Ù²×­Ö®×¬Ò¬Ò¬Ò¬Î¬Î¨Î©ÊªË¨Ê§Æ§Å¥É¤Ä¤Å¡Æ¢Ä¢È¥Ð§Ï©Ò¯Ó«Ö¯Ö¯Ö ¯Ø°Ô³Ó«Ò¬Ì¬Í§Å¨Ã¥»µ´¨~xi`oWniMl_Kl]K`YK]KD]WKYMFWODYSKUSIWQOWSB[SKYQ=[QD[QKSWK]KK]QFUQFYOI[SIWQD]SFWUI]QK`SK_SFYSKWUF[UI[QK_UO_WQ`]MdYMfkgo«¶¢­¼¦³½§»»§»¾ª»À¥º»¢¾¾©½»¡¼½¦¾»¥½À¥»»¦º¾¨»½¥º¼¡½¾¥»½¡¹¿¥¼½¡½¾ª¼¼¥¿À¦»¿ª¾¹§¼¿£»Á¥»¾¥¾¾©¼Á§¾¾§¾¾¨ÀÀ§»¼¦¿Á¨½¿¬»¾§¿¾©½À¨½¿¦½¿¦Ã¼ª¼¿§¿¾¥¾À©¿¿§½¿§À¿¤º¿¥¾¾¦½À§¾¿¨¼¾¤½Á©»À¦¾½«Á¼¥º¿¥»¼ª¿½§¿¿¦º¼£¼¼¨¾Á¨»»¢¼º¤»¾¦¾¼§»»¤¼º£¹¾¥À¼¤½½¤º¾¤º¾¦¸»¥¿¾¦ºº¥º»§»¿¦¹¾§»»¡¼¾ª»½¦Á¼¥»¼¦»¾ »»¥¼»¥·»¥»»¢¼»¡º¼¢¹»¡·¼¨¾¾¥¼¼¥»º£¼¼¦¹ºº¹¤¸¼¤¹º¥¼½¦¼¼¥º¼¤º»¤¹º¥ºº¥·¸£»º¤·º¥»¹¡ºº¢¹» ¶» ¹¹¤¶¹ ¶· ·º¤µ¹¦¹·¢¹»¦·¶ ·º¥·½¡½¼¥·»¡·¸¢¼»¤´·¥ºº¤¸º¤·»¥·¹£·º¦¸»£¸º»¸£¶¹¡¶¶·¸¡··¶·¶³·´´·¤·´¡³· ·³ ³· ¶¹ ³µµ³´¶¡·´¶²µ³ ·´´·¶µ¢³µ ³µ±¸µ²³´³³³´³µ·³¡²·³³´µ¢³´³´±³³²±³³¶ ³³¡³µ¢³²­µµµ³³¯³±´±³²±°³±³ ²³°¯³³²±²²°³µ³±³¯°°±³±²²¯²µ³²°³±®³²®³³°¶°°³¯®~~ ¡¡¢£¡£  ¡£ ¡£¡  ¡ ¢¦ ¢ ¥£  ¢££ ¡¥¢¢£¡¡¤££¢¥£¢££¥¡¤¢¤£¥¢¡¥¢¥¤£¦££¤¢¥¦£¤¡¤§¤£¥¥¦¤§¥¨¡¥£©¤¥¡¥¥¨£¥£©¥¨§¤¥ª§§§¥¤£§«£¨£«¨ª§¦¥¨¨§£¥©§£¨¦¦©§§©§®©©¦¨ª«§«ª©£¨ª«£©¦©¨§¨«©¬¦¨§©¦®¬«¦§«©©©¤£fkMY?rK8dB5[I8S?=OI8MB8O:8QD3O?5KD8OD0M?:KI5MD5OB=MD:I?8OD3ID5ID8O?5KI:QD5Q?8IB5M?8OI3KI:O?5O?5S?:KM8S?8QK=QM?YYQ`|ok£~»ÊÏ£Ö¬Ý¯â§³å¥´éª¹ë¬»î°¾î°Áñ¬¿í­Âì¬Áì¬¾ç£½ã¥»æ¦ºã¤¹â¹Ù³Ö²×±Ù±Ò³Õ ¯Û²Ù³Ý²Ý±Ý°Þ²â·ä¤¸æ£¹ê¡·é©»ë«ºî§½í­¿ï®Àð®Àó³Áô­Áö²Ãô´Æõ³ÄöµÁö·Åø»Æø¸Çø»ÈøºÊ÷¶Çø³Ãò³Áï§Áê£»é¤¹è¡¶ç¶çµè¶è¸ë·ê»é·î»íÀï¡¾ò Áð¤Ãõ¦Ä÷§ÄøªÄõ¦Ãõ¦Äó¤Ãó¦Áô¬Ãø¯ÃúµËú·Êú»ÌúºÍúÁÒúÅÕúÅØúÇÙúÓßúÔßúÍâúÆÝú¾ÖúºÓúµÎö®Åò¨Ãì§Àä¹á¶Û´Ú°Ù¯Ü®ä ²ë¡·ï¤¼ôªÁöªÄôªÆóªÇõ¨Æò£Äï ÄîÁì½ì»ç¼å»à·Þ²Û³Ü®Þ®ß¡±ß¦®ã§°á¥²ß£®Û¬Û «ß ªß«Ü¬Ý«Û©Û­×¨ÕªÓªÑªÒ§Í©Î§Ì¥Ê¦Ç§Æ£È£Å£Ä¢ÃÄ¡ÃÀ ÃÁÅ¤Ã¢ÆÈ¥Æ¤Ì§Ê§Ï©Ó¨Ô«Ö¬Ó¬Õ©Î¬Í­Î©É¦È£Â½·°~¬~¢wkd{SwiIl_FkSB`K5WI3UF?SF5SI:MD:SD8UD=MB5OI5UF?MD=OD8UI8QI8SI8WB:MI?QF5QD?MF8MB8UF:SQ8QB=SK5UF8QI:SF:QIBUM?UK:YI:QQB]OO`xto²¡³§·²º µ¹´»¤º·¸·¸¸····µº¸··¹·º····»¹¹»¡¶·»¹·º¸»¸¼¸º£·¹¸· »·º¹ ½·£·»·¹º½¡·»¡»»¡»¹¡¹¸£»¹£··ºº£¸¼ ¸º¤·¸¢·»¹¸·¿¡¸¸¹½¶½¡¸·¢º·¸¹£·» º·¼¸¡¸¸ ¶¸·º¸¸¡º··¹£·¹¸·»»¥º¸¡···¹´¸µ»¹·³º£··¡·» ·¸º·¡··¸¹¡´·¢···¸£··¶¸·µ·¸··¸¸··´·´º·¸ ¶¸·µ·· ·¸·¸¶µ´·µ¶³·³´µ··¸¡¶µ¸³·´µµµ´··³´·µµµµ²´µ³¶²¶³µ·²³µ³´³³³¶³³´±²´³µ³³³³±´µ´·²¯µµ²µ²·µ¡¶´²´´· ®·µ°³¯³³±±±´²²°¯³³±´°±³³±±°¯²°°¯¯¯°®²²¯¯¯³®³±¯°°°°±²¯°°³°®²²¬°®«°±°°°¬±¯°®°«°¬®­¬­®¯­²®°±¬°¯®¬¬®°¬¬¯«­¬­®­«¬­¬¬­¬«««­¬¬­ª¬®¬­¬¬¬ª¬ª«««®¬¬¬­¬¬«©­­©¬¬¬«¨«°¡  ¡¢¡ £   ¤ ¡¢¢ ¡¡¤ ¢¦¢¢¡££ ¢¡¡¢ ¢¡¦  ¤¥ ¤£¦£¤¤¢¥ ¥¢ §¨¤§¡¤¥¤ ¤ ¥¦¥¥¥ §¦§¢¨£§¥¤©¤¢£¥ ¥¦§£§£§¤¦¤£¦§¤¥¥¤£§¡¨§¥¦§¢©¥§¨§¥¨¦§¦ª¦­¦¤«§¨ª¦¨¨ª¥«¤¤¦©¥¥§§¨ª¨¬§¬¨¨ª¬§¨¥¦¤©¨©¥©¨«§ª§¬©©¨¬¬ª§«¬¬¨­ª¬¬ª««¬ª©¬¨¯­¨§¯©©¬©¬¬ª®ª¬ª¬«¬ª¬¬®¬®«®®¬§¯­«¬¬®¬­®¯¯¬°¬°¬¯¬®«°«¬¯²¬®¯­«±°¯®®¬®ª³®­²²¬³®«£«nu]]KzUFgOD`QD_KFWSIYKDUODUM?WMBUOFWFBSOK[MF[KBWOISOFWIDYKFUKDWMFUKIUSF[IB[K?QOK[ODWSFSSBUMF[KFWSKWSIYWK[[KWYQbf_gwq¬ÀÎÕ¬Ý¡¯ã¨´ç«¸ë¬¾ï¬¾ñ¶Áô³Àð³Åó³Æô³Æò³Áó´Äï®Ãå®Ãè­Àë­¾é¥Àè¨»à¦»â¡¸â¡¶à¥·Þ¢¶Ý§ºÝ¢µà¤³á¤·ã¤·â¥ºä¥»ç¨¸è§½ê¬¼ï¬½í«¾î°Áð±Áí°Áð¯Áñ²¿ñ²Ãó³Ãô±Àó´Ãõ´¾ô¸Äö»ÁõºÃö»¼ô¹¿ï¶¼í­¶ëª¶ç¥µá ³â¯ß­ã°â¯â³æ³èµç¸í·ï»ñ£Áò£Àô¦ÄõªÅø­Ãù­Æú²Æú®Éú¯Îõ­Èõ­Å÷±Éù¶Çú¹Èú¾ÌúÅÌúÅÓúÅÛúÊÙúÈÜúÊÝúÓÞúÐâúÌãúÇàú¿Øú¼×ú½Óú·Ðô­Çí©Ãé¢¾à»Ý´ß³á°â ´ë©¶ñ¬¾÷¯Ãú²È÷±Ìú¯Éø¬Éõ©Èò Åð Äð¢Àë¿æ¸á¶Ø²Ñ¯Ä«¿§½´¢­°¯¬§¬¯µ½ÂÇÌÏ¥Í¤Ð Í¡Ì§Î¥Ê§Ì¥Í¥È¥Ë¦Ç¡Æ¦Ã¦Æ§Ã¥Æ¥Ê¡Æ¥É¨Ê§Ê¤Ì¤Î©Í¬Ï©Ò®ÖªÕ¬Ø£´Û¥°Ý¥´ß¢±Ü§³Û£±ÖµÒ ¯Ñ®Ï«È§Ä¤¹ ·³§tlbu[xgOl_KnSIfQK_QI`QF[QK]KBUQB[QKSQD]KF[QKYSO[MDYQFYSI[KD[MFYSI[KD`QMUOMSMB[KF_UM[OI[WF[SK[QD_UK`UM_QM]QF]UMYQMfWM]kinªº¡©¹´º ·½¦»½¦¹¾¦»¿¤»»£¹»§¾½¢½¿§¾»¥¼»§¼º¢»¾£»»¢¾Á¥»»£»½¤¼¼§¾¾¥½½£ÁÀ¦¾À¨¿½»¿¥¼Á£½½¦½Á©½¿§½Á¥¾¾¦¼À¥½¾§¾½¢½¾ª¾À¤»¿ª¼¾©¿»§½¼©½À¨»À©¾¾¥½À¨»¾«¾¿¨½½¦º¿¨¾¾§½¼¤¾¾¨»¼¥ºÀ¨¾¾¦»¾¤¾»¤¼¾¥¾»¦¾½¥¾Á¥»¼¥»À¨»À£¼¼£¹¼¦»½¤½½¤¾»¤¼¿¦½¾©½¾¤¼½¦º·¦½À§º¼§º½¦½½§¾¼¥¹½¤º»£¹»¤¹À§»¼§¾»¤¼À§»»¥¼º¦¾»©»¾§½¼§·»¢º»£º»¥»¿¤¹º£»»¢¹»¥¹½¤½¸¢»½¥»»¦¼º¥¹º£¹¹¢¹»¤¼»¡¹º¥·¹§»·¢¶»¥¹¹¸¸£¶»£¹¹ ·¸¸·£µ¹¤º»£¸º§·»¡·¶£º·¦¹¸¢·¸£µ¹¦·»¡º· ¸¸²¹¥ºº¤´» ¹·¤·º£¹»¤·º¢¶º¢ºº¢·¸µ³ µ¸¢··¤¸·¡µ´·¶¡¶·¶´¢·º¤¶¸¤¶¶¡µº¡´³ ³²·´ µ¶´¶³·µ·¶´º³¡µ³¡µ· µ³¡´µ³³³µ³¸¡³³µ³³µ µ³²µ³° ²¶±³µ³°³²³µ´®³³°µ´³´±³¶³³´±³²³³³¢³³³³¯³³°°±´²³±´±°±³³¯³³®­²±°²²³³³¯³±±³±°¯±¯´­®³~|¡¡¡£¢  ¢¡¢¡ ¢¢ ¢¢ ¢ ¡¡¡¡¢¢¢ ¡£¡¡£¤£¡£££ ¢¤¢¡£¥ ¦£§¡¢¡¤ £¡¡£¢¥¤£¤¢¢¡¤£¦¡£¤¥£§§¦¦££¡¦¡££¤£§£¤¤¥¦¦¤©¥§§§¦§¢«¦¦¤©¢©¦ª§«£¨¥¥¥¦§¨¦ª©©¥§¥©ª§¦«¦§ª©¦©¨¦¥ª§©ª§©¦¦«§¥§¨¥©§«¨©§¬§ª§«ª©¥©§¨«¬©©¡¥loIS?qI:bI3YD:OD=OB0W?:SD8MF5MF8QD5K?5QD5QB:O?5OB:O?3QD:O?5OF:MF5QB:OI8OD0KB5QB5MI5MB:KI8QD:Q?0OD8MB?UI5UB?QM:W`S_~nk§¾ÉÔ¦Ø¨Þ±å¥·ç¥·é§ºì®¾ñ¬¾ð®¿ï­Áð®Àó­Äò®Áí¨Âæ§¿å©»æ¦½ä§»å¡·â¤ºà¡µß¡·Ü¢·Ü³Ý¡µÝ °Þ³Û³áµâ¡¶ä³å³ã¢¹å£·æ¨¶ç§¹ç¥ºê¦¸é£·é¤¸ç§·æ¦µç¦·ê©µè¥´å¤²â¤¯áª«Ù£®Ô§Î§Æ Âº¶´´¶¶ÁÊÏ¤Ò¨Ýªá¬å®èµì»î¾ï¤½ñ£Àõ«Äô¬Äø¯Æø¬Èó§Äô§Âõ¥Áõ¬Àú°Æú´Êú»Íú¿ÏúÁÔúÀÓú¿ØúÂØúÆØúÅÚúÁÛú¼Úú»Õú´Ïø®Ìõ«Çë§Àæ¡½â·Ü´Õ®Õ®Ø­Û±ê¥¶ò¬»õ¬Â÷®Åø©Çö§Çô¢ÈïÃíÃè»å·Ù´Î°Ä~§²r¤ lgz_z]x_tYn]]nWgU{k]uo]q_xg~kotx§x°~¹¼¿~¾¿¾Á¾¾¾½ »ÂÀÂÄÃ¡Æ¡È£Ì¥Ê¨Í¨Î¨Ð§ÔªÕ­Õ­Ú±Ù°Û ³Ú¯Õ ±Ô­Î­Í©É§Æ¡½¹³®¨xkb~[wiKrdFiUBfM?_F:UI?QD8UF8SK:QB8UI5QF:IB5SD:OI=MI5UD5QD:KD?QD8QI=MF?OB8OI:MF=UD5QK:OI?KF=SIBQF=QB8UO=OI?SK?YI:UMBUM?WUOdoon­¶«·°´±µ³»¹¸·¼¢¸»·¸¹··º¹¸¹·³º¹·»¹ ·¸´·¸»º» µ··º¡º»º·¡¹º¡º»·º»¹ ¸¹·¹ºº£º¹¶¾£¸µ¹½£·»»··º¡·»£¸º¡´º·¼¹»¡¸¸£»¸ »º¸¹¡¸·¡¸·¡º¹¹»¡·¹··¼»¡¹¹¡»·¡¸ºµ··¸¡»¹·º¸µ¹¸£¹¸¸·¸¶·¹¤º¸³·¡¸º¶·¡·¸¹¸¢µ··¸ º¶¶¶¸´¸¶³·µ¶···µ¡µ·¶··¸··¶·µ¸µ···¢·µ¶¸´µ¸·µ¶µ·´·±¶··µ·µµ´´´·²µµµ¶¶³³³´³µ³·³³µ³³´³·µ´¶·³³µ³³¶³²³µ³¶¯´µµ³·²³²¶³±®³µ³²³³²³³²µ³´±µ·²¯³²¬²²²±³³®°°´²°²°°³°°°¯²³¯°±°°±°²­±±°®³¯¯°±¯±²³°±®­²¯°®°­­¬®¯¯¬¯®°®®«®®¬®¯®¬®°¯«¯¯®®®­¯®±²°¬®¬­®°¯«¯±­«¬°«¬«©¬«¬¬®¬«ª­¬©®ª«¬°«ªª®­¬«­««ª°ª«¬¨¬ª©¬«¡   ¡    ¢¡¢   £   ¡¡¢£¡¡¢¥ ¥¡¡¦ £ ¡¡  ¢ £¢¤¡¤ ¤¡¢¢¥¡ ¢¦¢¦£¤¥¥¢££¥¡¤¥¥££¥¥§¥¤£¦ §§¢¤¥£©§¥¢¤£¦£¥¤¦¦¦¡¨£¤¤©¥§¥¤¦¦¤¨¤¦¥¦¦©§¨¦¨¤§¨¤©«¥«¥¤¨ª¦¨¬©¨¬¦§§¨¦§¨§¥¬©«¤¬¨¬©¬«­§¨¨©§¨¦§¬©§«¥¬­¥£¬§¬ª¨§«§®¨ª©­«­«ª§­«¬«­¬¬¬­©¬ª¬®­©¬¬­©­¬®¬¬ª­«¬ª¬¬®®®«¬­¯©®®®°°¬³¬°¬ª®°«­¬®­¯¬¯­«­­¬­­¬°¯¯¯®®¯­®®©¨r¡oYWKzSMiQDbQKYOD[KB]IFYMBUOF]ODWQBQDIYIDWQKYKFWIFQUI[OFYQFWQDYSBUIFUSIUM?YKF[MDSSFWMFUQFUODWIB]SI[SFWSI]SIWYMbg]ioo¬ÀÑ¢Ö¤ªà£®ç©·é®ºì®½í­¾ò´ÅóµÁò´ÅõµÆ÷·ÅóµÉö¶Çô³Åï³Æí­Âì°Âì©Áì«¿é¬½ä¨¾ç¦¹ã¥»ä£¼ä§¼ä¦·å£ºä¢¼â¨¶ç¦·è¦ºç¦µå¤·ç¥½è§·ç¤¸ç§½ç§·æ¤¶å§µä¢°ã¨±à±Ù¬Ð¬¿§¶§~{z{owq|izi|lkl{¨±ºÊ¢Ö¨á®ç°ï ¸ï¥½ô§Âô§Æö¬Æø³Êú°Éú°Ë÷­Ëö©Ë÷¬Èú¯Èú·Êú¼Ìú¿ÏúÃÒú¾ØúÅÕúÂÚúÃØúÈÝúÆàúÅÜúÄÛú¼Öú¸Õú²Îø²ÈðªÃë¡¿ã»Ý¸Ø±Ù®Ý¯ä¢µïª»õ²Ãú¶Æú³Ìú®ËøªËö¬Êó¥ÈìÁã¸Ó±¹¬¬{¦¥z£t¤©r¡d[|W~UtUnYkYz_Q|]MunQwqSzoU~qSu[z`binow¦x«~³¶¹¼»½»¾À ÂÃ¤Ä¡Ê£Ê¤Ì§Î¨Ò¬Õ¯ÖªÖ®Ú±Þ ²Ý¡³â¥²á©·âªµÝ¥·ß§³à¥³Ü ³Ø¡³Õ­Î¯È§Ã¥º¢·¶®£urdtUxiSobSnYIgWK_OI]MIWOBYSK]SD[QB]MKUM=[QKYQI]QB]OD[SFYMD]QDYSIUSIUKBWUDUQDWOD_SK]SIWKI]SD[SMYQI]SFSSMWMF_QF][K[SFk]Qgdloª»¬»¢³¹¡¹·¡¸À¥½À¥»¾£¼¿¤»½¢½¾¥»À¤¿º£·¾§¾¼¦¼º§¼¾¤¼¿¡¹½¥¾½¥¾Á¥¹½¢º¿¤¾À¥¼½¦½¾¨¼À¨½¼¥¼À¥¿¿¥»½§»» ¾Á¥½À§¿¿¢¾Àª»¿£¾½¤¾Á¦½¾¤¾¼¥½¾§¾½¦¿¾¤¿¿¦¾½¬¾À§½½£¼½¦¾¾¥½¾¤»¼¥»½¥¹¾£¼¾¬»¿¤¾»¤½Á¦»¾¤¾¿¦¿¾¤º¿¥»»¢»¿¬Â½£»¼¦¾À£½¾©¼¸£º»¢¼½¥»»¢¾¹¤»¾¡¼¿¦»¼§»»¤¹¼¥»»£»º¡º»¤»»¥¾½¤»»¤¹»¡¸¹¤¸½£¾»¦¹¸¡»¾¤º·£¾º¥»½¦»¼¤»»£¹»¦»·¤¸»¡¹½¥¶º¤¸¸¤¸º¢º·¦»·¡·¼¢·»¤º» º¹¤ºº¡·º¸»¡»¸¥º´¹¾ ¶¹ º·£·»·º¤·µ¢¸¹¤··¢·¹¤º¶¡µ»¢µ¶¤·¹¢¸½¢¸¹ ¸»··¦¹¼¤¸¶¶¹¡··¤·· ·¸¦¶¹ ·¹ ·¸·· º´ ¸···¡··³· ¶· ³·µ´³¹¡¶¶´³·¸¥·³µµ µ· ¶·¶´´µ°·¡³µ³¶ ··µ³¶³³·´µ¸´´±¡´µµ³µµ ´°³·µ³¡¶µ²²¯°³·µ³¡³²³²³²³³±³³³°´²°¡´³¯²²µ²°°³­°°¯³´±±³®²²°®¯²³¯¯²°²±¯³³±³²²±³ °¯®¯°±­²¬z~~~~¢¡£¡¢  ¡ ¢¢  £ ¢£¤£ £¢£ ¥ ¡¢¤¡££¡£££¥¡¤ ¢£¡¢£¥¤£¥¥¡¥¢¡¡£¡§¥¤¢¤ ¥ ¤¢¦£¤¦¤¥¥¤¤¦£¢¤£ª£¨¥¦§¤¦¦¤¦¦¦£«¦§¦¬¦§¥§¦©£«¤ª§£¦©¡§£¨¨§¦©©¨¥©¨ª©¨§¬¦©¤§©«¤«¤¥¨©¥©¬©¨«¥«©ª©««¬¦ª¨©©¬ª«©ª«¤¢knIQ?nK:_K:YF8SF=WD5M?5KF8OF5IF5Q?:I?:ID5OB3K=5OD5QI8MK5M?8UD5IF:KD5KD8MD?QI5OD:OD=IB3UF3OF:FI8QD:UM:OM?QI=WODU]S`win§~½Í Ò¢Û¢¬à±æ¦¸ê¬·ì¬ºê¬»ð­Àï°Ãñ²ÁôµÁô²Ãó±Åò­Ãé«ÅæªÁê­¿ç¨¾ç¥¾â¦¹ã¥·Þ·áºÝ ´ß´Û³Ý³à³Û°Ý±Ý³Ü´Ü¯Þ¯Û¬Û­Ù¬Ö¬Õ£Î¤Æ½®xnit[tYkQ|kMfQ|_KxYFw]Dr`FtkMutKztO|Ug§r¦q¡z¤x±ÄÖ£ã¬è°ì·ð¼õ¥Áö¬Æø«Çø«Èõ£Æò¨Çö§Äõ«Áø­Åú³Èú´Èú»Ïú»Ðú½Ðú»Òú»ÓúÀÓú¾ÕúÁÕú»Ôú·Óú¯Íõ«Éñ§Äé¢¿â¹Ý²Ô°Õ°×­Ü¬ß°í¬¸õ®¿ø®Çú°Èú«É÷ªÈòÆé¾ÙµÂz¬¦q¢k¡x®ÃÄz§¥n£YMKuIxgBz[InWDnYDndFouOluFrtKtrWu|Y|f|`_~|W|z[|~]z|]ffoªr¬t±t²zµ~¶¸¾¿ÁÅÉ¥Ë£Î§Õ©Ô®Ù¬Ü±ÛµÜ£¶Þ ³Ý¡±ß¡µà¢µß¤´Ü¡³Ö°Ô°Î©È§Æ§Áº³²§|td~YxgOtbDiWF]Q?[D=YM=WI:UD8QD=MM5UD:SM5IK5OD8MI8OF:OI8SF8MF5QF8SB5QF:Q?=QD5QM8MD:UD5QI?OI5UF:OM?UI:QK=SM:UM=UF:WM=SM8SO:Y[Sdut±£´ ¬·²¸´»¡¶¹¡·¸·¹µº»¹¹»¸··¸ ¸··¸¶¶¹··º¢·»¹¸·»¡·¸¸» ¸»¹¸ ¸¹ ¸½ »¸¹¹¡¸··»»¹º¼·º»»¢´¹¸·¡¸¸·»£´º¸»¢¸» º¾¤¸·¹»¢¸¹ »¹¡·»º¸ ¶·º» ·º¹¸ ¸¶¹» ¶·¡¸··¹´» ¸¹¡¹º¡··¸»·º¢·º ¸·¸º£¸¸¸µ³¶¶¸·¸ ·¸·µ¶¸ ·¸¸¸´¸·¸·µ´º·µ··µºµ³·²´¸··µ·µµ³·¸¸³´·³¶·³´²·³¶³· ´µ´²µ· ·³·¶¡¶µ³²¹µµ·³µ·´µ´³´²³´²±´·°³³°µ¶³´¶°µ³³µ´²·³´µ³³·µ´³³µ´±³³´²µ²´³´¶±±±²µ±°´²³°²°±²³®³²°®¯´°¯¯±®°³°±±±²²±¯³®²±³¬°°²°±³°¯¯²®°³«¯²®±³¬²®¬®°­±±°®±±­­®°®®¬®®«®®®¬­­¯¬°­®®«­¬°°¬«­­­¬­¬®¬®®¬­¬­¬¬¬«°¬«¬©¬¬¬©««¬««¬­¯©«©­¬¨«­ª«­«  ¡  ¡ ¢¢  ¢   ¢¡ ¢  ¢ £¡¥¡ ¥¡  £¢  ¦¡£¡¤¡¤¢ ¥¤ ¢¡£ ¥£¥¤¤¥§¡¥¤¤ ¦¢§¤¢ ¦¤¥¥¦¦¢¨£¤¢§ ¢£¦¥¬££¦¦¥¨¢¨¤¥¢©¢¤¦¥§¦¢¨§§§©¥©¥¦£ª¨©¤©§§§¬¥¦§«¢¨¦§¨¨¨©§©§¬ª¬§«¦¦§ª¨ª§¦¨ª©ª©ª¦®§ª§¦¨¨««¬«©¬©¬©«ª¬¦ª§¬­¬¥¬«¬ª¬ª¯§¬§©©­¬°¬¬¨¯¬¬«®¨°¬­®¬©­ª­¦°«¯¬®­¬¬¬¬¯¬®®¬«­­¯­­­¬«®¬¯¬­¬­­®¬¬­¯­­¬¯¬¯¯°­¯­®°±­¯¬¬¤©wx_YFxSDlQI]OD_KF[M?bM?[MIWQB[O8YMBWQB[KFWMDSKDWOD]Q?UOB[QB[MBWMD[K?YSKYMDUO?WMDYOKSKB[KBYMFSMKWMDYSFWUM_SB_YK]`]k|qw­ÀÐ¡×¥«ã«°ç©·ë°»ì¬¼ð´Áð°Âô³Åö¸Æ÷»Ëú¾Éú·Êø¹Íö·Èô³Ëð±Æó°Æñ²Äï®Ãë«Áé«¿ê¥¿è¦¼ä¼ã¤ºâ¤µáµß·á¢´à ³Ý¶Ü´Ö¯Ø¯Õ¬Ò¨Ë¨Á£·¦{wrnfb`wWuSWuMnM{bMx_Oz`KzlUzzS_di¤¾Ë§Ãª·{¥ª{¡ª ¸Õªå¯ð¥¹ö¥Åù¨Çú²Îú³Îú²Òö§Ìö¬Êö«Ç÷®Æú³Èú·Ðú¼Ðú¿Íú¾Õú¾ÕúÀÖúÁÙú¿ÕúÆØúÆ×úÁ×ú»Õú´Ñ÷°Ëò«Çì¥¾ã»ß·Ù·×µÜ²ãµæª·ô²¾ú¶Åú·Îú¹Ñú±Ðú³Ðõ¤Æä¿º{µ¥r¯r©¬£Â¢Ó«¬Þ®¶Û¸¾³k []WwMiSzfM{gKzuUzU|Y|[~gu { tidW[__fi q¥t°w³|¹½¿ ÁÄ¤Ê¤Í¬Õ­Ø®ß¢³Þ£³á¦·ç¬ºé¬¼ç¬ºã¬ºâª»å¬½åª¼ãª»ã©·Ü¢¶Õ ³Ó¯Î¬Ê­ÆªÁ¤¼ ·¬£|odnU{bMq_SfYFgQDbSI_QK[KB[OFWUD]ID[MDSSF]FDWOF]UI`MK]ODUQB`ODWQI]QI[MIYSF[SISMD[SD[UIYSDbODWSMYSK[MB[QK]WD[QK]WM[UD`SFd[Sirzr¬¹¤¬Á¦º¼¤¸Á¥¼½¥¼½¥¾»¥»¿¡º¿¤½¿¤¾¼¡¾À¢½½¥½¾¤½»£º¾£¾¼£½À¤º¿¥»¼¤¿½£¼¾§¼¿¤¼½§¾¿«¼¿¤½¼§¼¿£À¾¨½¿¦¼Á¤À¿¨¿¿§¿¾£»½£»½¨Á¾¥½½©»º¨¾À¢¾º¨¾Á¤¼À¦¾½§¼½¥¼¼¤¼¼¨»¾¦¾»¤½¾¤¹Á§¼¿¨¾¾¥»¼¤¾½¦¾¼¦»¾¦¾¾§¼½¦¼Á¨½¾§½¿¤½»¤½¾§¼¾¤»¾§¼º¦¾¼¡»½§¿¼§»¼¥¿¾¦ºº¥¿½¢º¼¥¹À¤º¼¡¼»¤»¼¤½»¥¼¾¤¼¼§»»¡»»¡¾¾¤»º¥½¹¥¼¼¥¹»¥ºº£»»¥·»¥¹½ ¸»§¹»¡»¹ »¼¥¹½¤»» ·¼¥ºº¡»»¹»¢·½¤¸¸¥»¾ º¹¤»»¡¹½ ¸¹¤·· ¶»¥·»¤·¹¢¼¹¡¹¸¥º¸¡¹·¢··¢¶»¡¶·¹·¤¶¹£¶¹£¹½¢¹·¢»·¡¸¹¢¹º¤·´¶·´·¢···º¶µ£³··¶¡º¼·³ ··¸µ¤¶µ¡¶¶¡³¶·º·´³¸´¶´´·´³¶¡¶¸¸´¡µ¶¡µµ ··µ¶¢·· ·´·¹¢¶²´± ´³³µ¶´³¶ ³³ ³³¶¶³´ ³°³µ´³³µ³°µ³²± ¶¶³³´³³³µ³³³´µ´³¡³±´¯°´³´¶®±²³±°°³®­²­°³±²±°®°±³±®¬²°®´±®³°¯®«±²³²±®~~~~¡  ¡£ ¡ ¡  ¡¢¢¢¡¡ ¡£¡¢££¡¢£¤££¡¡¡¡ ¥¡¢ £¡¤¡¤¡¤¡££¤§£¢¡¢£¢£¥¤¡¥££££¢¥££¡¢¡£££¢© ¥¥£¥¥£¨¤¦¢¤¤¦¦¢¥££§§¨¥¨¤¦§¨¦§¦§£¦£¥¨§¤©§§¥§¦©¨§¨¦¦¬§¦¦¥¦ª§©¥«©©¨«¨¨§¨¥©¨«¨¬¨©©§©¦ª©ª«¨©©©¥§¦¨£lkOO:lO?`I:UD5U==QB8MF8SD3II=OD8MF=MI8MD:OB8KF8MI:QI5SB8KD5Q?3KI:OB:M=:KF5MF5M?:KI:OF8MD5OF3MF:MD8MI8QK?SO:QO?YYO`w`g£{»ÌÙ¦Ý£ªß¥³ä¨µê«ºí¯¾î®¿óµÁôµÃö´Äø¶Æù·Çù³ÆöµÈó³Çô²Æñ®Æï©Áí§Àë¨½ç¤¼ã¡ºàºà¡¶Þ²Û´Ü®Ø¬Ú¬Ö«Ó©ÑªÐ§È¥Â¸x¥oi___`n£l ib~Q|KKw|M|zIulIobDodFuqIu{WzW|`~q«ÊÕ ©Ð¬Æ§·w¤¬q£ª{³Ó¡ð¶ò§»÷¥Áù³Äú³Èú®Íö§Êô§Ãó¡Âõ¨Åø®Ãú³Èú³Èú·Ìú¸Ïú»Ìú½Ïú»Òú¼Ôú¿Óú½Ðú¼Õú·Ïú³Êô©Æê¢¿ä¼à¶Ú²Õ±Ô¬Ø¬Ý¬ä¢µò¬ºøµÃú¶Èú³Îú²Ëú«ÊäÀ¸t³®w®Áwª»ª¿§Òª®Üµ³ç·ºä¥»É·¥o¥[SO{MtIxnKwtIxzKw{QwQz|U|i|x¥¨§xnf]UQQQ[``¦k¬n«r±t»¾ÁÇÌ¡Ò«Ö©Ý®ß£³ã§³é¨¸æ©»æ©¸äª·å¨ºâªºã©µÞ£¸ÝµÕ®Ö°Ï­ÊªÇªÃ¢½µ°§ti_unQw]?fM?_Q?]K?]K:QIBMB5QD:OD8KI=QD5KK:QI:MF8OD8KI?OB=KI?OI8Q?=QI?SD8O?:QI?QF5QI5SM:MF=QB5MF:UMBMI:QI:MD=SM?UI=OQBSO?YQ=Y]gbz¨³©¸ ±¹¶»¤¸»¡·¹¡»º³¹¡¸·¹» »º¹¸»¹·» ¸¸¸¹¹º¡¸·¢¸¸¸¸¡´· º¹£·»·¸¡¸º·º¡¸·¡·º·» º¹¢¸·¡¸º¢¹·¡µ·¡»¾ ·»¶» ¹· ¹» ¸º¡»º£·»¹»¡·¸ ¸» ¸» ¸»¸¼¡¹»¡·¸»¹··¡»º¡·» ¶»¸º¹· ·º¡´·£º·¡¶º¢¹»¶·¡··¡·¶µ¸ ´» ··¸´ ·¸¢¸¶¡¸·µ» µ··¹··¢¸¸·¸·º±¸ ´· ·º·¸··¶·µ¸ ²··· ··³··µµ´´µ³·³··µ¶µ±µ´··´´¹¶·³´³·²µ¡µ¸³··´µ¶·¶²µ³µ²¶²¸ ²²¶´¶µ³³´µ²³¯´°µµµ±·³´µ·³µ³´²³²³³±¯´­´±´³³³³°²±¶±±±°³²±°³±®¯®°¬­®°­±¯°¯¯¯°®±²°°±°±®°°±°µ±±®´¯®­±±­®°¬±³¯°±°°¯²¬°°°®­°¬«®¯­°°¬°®²®°¬®¬¯®¯¯³«¬­¬«°­¬¬®ª®­¬®¬««¬¬ªª¯®­­­¬­¬«®«§«­¨¬«©§«ª¬¬«­¬©©¨©ª®ª ¡ ¡  ¤ £ ¡¡¤   ¡  ¢¦¢¡ ¡¢¡ ¢¢¡£¢¡¤¤¤¢¢¦ ¥¡¡¢¤¥¢¡¥ £¢¤¥§¢¥¢£¢¥¡§¡¥¢¤¦£¥¤¡¦£§¥¥¢£¢¦¤¦¦§¥§ £¦¥£¨¥¥¥¨¤§¤ª§§¥¥¤¥¥§¤©§¨§§¨ª©§¤§¥§¦©§§¥§¥«§ª¥©¥¨©¨§©¥«§¬«§¨¬¦«©ª¢¨ª¨§¨§¬¨ª§«©«ª«§¬¨¨©«©«©¬©¯§©¬­¥«©«¨¬«­¬¬­¬©®ª¬©®¬¯¨ª¬¬©®¨®¬­¬ª«¬¨¬¬­¨¯¬¬¬¬¬²¬®¯¯ª±«¯¬­¬«¯°®­¬¬«°¯³¬°©ª¬¬ª±¯­°¯¬°³±­®¬¬¦©on[YDzYIiQD_UDbMI`QBYOD[K:YSISMDWKBWOBYMFWKD]QBWMIUS=YS?SODYOBSSKSQI[QBWSDYUD[M?WOBWOFYQKYO?[ODWQIYOD]YMUSF_YM__[k|qr¬ÂÐ ¢Ý¤¬ã«±æ®·ê¬¼í³¼ð³Åó·Ã÷¼Æù»ÊùºÊú½Ïú»Îú½ÎúºËú»Ê÷·Ðö¸Ê÷µÊö³Êó¬Æï©Äê¨Âç§¾æ¢»â¡»ß»ÜµÚ³Õ´Õ¬Ð¬Ê¨Ã¦ºz¢­q¡¡i_`_iq¨~¶¾ ·¢°|d[_WYQ~{OSY`fn¾ Ø¬¦Þ´¯Ü®ºÑ±È³Ä¯Ã{²»¯½­æ¡·ö«Àú±Æú¹Êú·Òú³Õú¬Ì÷­Êø¯Èú°Ìú´ÇúºÎú¹ÒúºÐúºÒú½Ôú¿ÒúÁÖúÁÓúÀÕúÄÕú»ÕúºÓú³Ìö¬Ìï¨Áå¤½á·ÝµÜ³Ú°Ý±â³ì¨»ô²¾ú»ÇúÀÏú½Õú³ÐóÉÈ~Á°~·Ó»±ú¸Ãç§ßÕ­¿ßºÀèÁÁìÅÃí¹ÈÞÃ½·d§`[UUUYW_]f|¯´¶ ´·~ ¸z·o·n°i©k¨d¨g®iµn·u¼t»z ½x Ã Ã¥È¦Ð«Ö«Ú³â¥µê©»é¬¾í³»ò²Áð³Åì±Áì°Âí²Àë¬¿é³¼ç©Áä¦·Ý¤¹Ø£²Ô¯Ð±Ì¬Æ¨Â¢º¢´±¡uri|z]gStWOk`IgQ?bQI_SFUM?[QK]QD_MF]OIYOFYU?YMB_OF[SI[OKUQF[QIYMB]SKYQDWOBUQKYQI]M?_UKWSF]SD[SF_WO[Q?YQF_SK[UK_QF_]I_UF`YK``Wkt{w¡³¥ ½¤´»¤ºÀ¦¼À¥¾¼¤»¿§½Á¨¾½¡º¾¥¼½¢½¿£»½¦¼¿¢¸¹ ¾¿¦¼¾¦»»¡»» »»¦¼½¥¿Á¦¼Ã¥¾º¤»Á¥¾¾¨»¼¦¾¿¢¾¿£¿¾§¹½¥Â¿¥¼»¦»¹£»¿¥¼¼¨¼¾¨»À¥¾¾¤¿¿ªÀ¾§»½£½¾¡¹½¨À¿¥¼½¦¾¾¤¾½§¼¿¦¾»§¿À¤»À¤¿½§½¾¤»Á¦»»§½½©¿½¥º¼¦»¿¤¾¿¦¼½£º¾¦¾¼¨»»§¾¼¥»¾¤½¼£¿¼¡¼»¤»»¤»º¤¼¾§·»¥¾»£»»£»¼¥»¼¢¼»¥»¼¨¼¿¤¾º¤»¼¥¹¼¥¾¾¡¹»¨¹½£¾¼¤º»¤»»¦»¼¢º¼¥·»¢»¹¡»º¢ºº¢»º£¸»¤»¹§¹¹¡¸»§»¼£»»¡¹»¦¹¹¥¸· ¹º º»¢·»¡¼º¥·¸ µ»£»»·º¡¹º·º»»¢³¸¢··¥¹¸¤¹¶¤º»»·¡µ¹¢»µ ¸¸¡·¸¢·µ ¹»¡¶·£»¶³»´¹ µ· ·³ ¹º£µµ¡´· ··µµ ¸··´¶³¶³ ³µº·³³¡µ³¶·³µ´¶¡³¶£³·¶µ¢³³³·¡´·¢¶·¶µ·³µµ´±µ²³¸¡°·´³³´¢µ·´¶´³³´³³³³³³³²³´³³³³³´²±±³²±³³³±²³³´®± ³³´²¡²²±²±®³¯³³°²±²±­¯±³°²¯°³¬®­­²±®³²°±¯­°°²¯¯­~~ ¡    ¢¡   £¡ £¤¢£¡¡ ¡¡£¡¡¡¢¡ ¢ ¤¡¡¡¢£££¢£ ¢¤¢£¡£¤¤¡¥¥£¡£¡©¢¡¤¥¥£¥£¥¡£¡¥££¡¤£¥¢¤£¦¤¤¤£¢¦ ¨¤¦¢§£¥¤¦¦£¦¥¥¤§¢¢¦§ª£©£©£¡§¥£©¥¨©§¨ª©¨¦§¦«¦§§«¥©¨©©¨¥ª£©¦¨¨ª¤©¦«ªª«¦¤¨¦©¥ª«¬«§¥¬©©ª¦¢koKW?qQ:`F=UF:UI5UD=IF=I:8OD5KF8Q=0KD3KD=IF3MF8OI8OB=II:MD:OD8MD8OF8II:M?:MI=KF8MB:QF:FI5Q?5MD:KD?QF5QM:SK?SM?QUQ_xfk¤|»ÎÖ¢§ß£¬å¨±è©»é¬»î±»ñ±Áõ³Ã÷¸Ä÷·Êø·Ìú»Ìú½Êù»ÌúºÉø¶Èø³Êø´Èö°Èò«Æï§Ãê¤Àæ¡¾â¹Ü¶ÖµÔ«Ó­ÌªÅ¤Âz¢¶t °i«d§`_Y_¡[«qµ·ÃÆ¤Ã§¾¢ªt YSQKO~~M|OQ~Y_n£È£Ü®­Û®³Ø§ºÒ´Í²Ì±Ù³Ü²È³Î·î©·ú³Äú¸Ëú·Ðú°Îø§Ðõ©ÈöªÂø²Çú²ÆúµÉú³Êú²Êú·Ìú·Îú´Ìú¸ÎúºÏú»Îú»Ìú¹ÌúµÍ÷°ÈïªÄè½ä¶Ù³Ö®Ö¬×­Ø®à®å§³ó«½ú¸Áú·Êú³Ï÷¢ËßÁºn·´¯Ëâ²õÓÂã§ÉÖ«ºÝ³»á»½æ¾Áç¼Ãá¨ÂÏ»ªi¬[UQOKQMU[o§¹½Á£Ã¡ÂÁ|ÃwÁz¼nµk¶k°k¹q½wÁwÊzÇz¡Å£Ë|¥Ë¢Ê¨Ò§Ø©Þ±à£®è¨¶ê¬¹î±¾î±¾ïª¼ì«¾ï¬¼è¬½ä«»å¬½å§¹Ú¸Ø°Ö¬Ï®Ñ§Ì¦Ä£¾·®©|£qg{[qMq]FkWDbU=YQB]I8UB8SK:KI3OB5MD5OB8QFBKF:MF5QI8MI=MD?QB:MK:KI5QB:ODBID?QD:OI8MI?SI8OK:OI?QD?UI:MD=SB:QI?OM8QI8SK?QM?UI:YI?W_``£³ «¹³»¡´¹¡³·»¸·»¡·¸´¹¢¸»¢¶º ··¶µ¶··» ¸·¸º··¹º·»¸¹¢¸¹ ¸»£»·¹º¡¸º ¸º ·¸¢º»¢µ· ¹»¥·»¹º·º£¹º¢¹¸·¸·¹·º¢··¸»¡·»¶µ¡»¹¢º½¢¹º·»¢½·¢¹º½»³·¡·¸¸¸·»¹··¸·¹··¡´··»¶º¶¸ ··¶¶³¸º·¡µ»£···»¡¸º¶·µ¶´»µ»¹··µ¡¶¸·µ¢¹º·¶µ¸¸·¢·¸¸¶··µ·¶·µ¶³¸¸·µµ°µ·´³µ ·µ³µµ·³¶ ³´³¶¶¸·µ´µ³µ³¶µ·µ·³²µµ·µ±´²³³·²³´µ²³²´³·³³´µ°¶±³³¶²±³µ³³±°²±³´­²®³³²¯³¶²²´®³µ²²¯²±³²³°³³®¬²°®°°¯°¯¯®¯°°²±²¯­°¯²³¬°²®®²°¯­®²³«°¯°°°±±°­¬¯±°²­°°®­¬®®®¬®¯®¯¬®²¬­¯°«­®®¬­¬²¬±¯®«²­¬««®®ª®­ª®ª©«­­¬¯ª¬®§®­©®­«««©¯¦«ª¬ª¬ª««¬©©§«¬««¡  ¡¢  ¢¡ ¡¡¢ £¤¤¡¢¡¡ ¡ ¢£¢¢ ¢ ¢ ¤¢ ¤£  ¤ ¢¡  ¢¤¢£¡£ ¥¥¢¢¡¦£¤¤£¢§¢¦¢§¡¨¢¥£§¥¢¢£¤¥¤¨£§¤«¤¥£¨¢¦¦¨¡¨¥¤ ¨¨¦¥¥¤¦¨¬¦¨¤¥¤§¦¤¨«¡©§§¤§§©¨§¤ª¦¬¦¨ª§¥©¦§¨¨§¨¤©£¦©¬¥ª§©¨¦¨ª§¬¤¬¨ª¦¬¦©¬ª¬¬©«¬­©¬¨¬¨«¨«§«§®¬¬§¬©®ª«¬®ª­©¬®®¬¬­¬¬¬ª­¬®¬¬¬­¨«¬®¨®©°¬¬¬³§°­¬®³«¯±°¬¯®±¬­¬­¬²¬­®®°¯¬¯®®­°­±­°­®­³«ª¥¬w¡|__M~SIgOI_QF`OD`SBWOF]KD`OBUOD]OBUK?UMI[O?[KK`OD[IFWOBYQF]SB[MKYQKUQI[OFYYKUOD[QOYOFUODYKDUMFWUM[SFSUQ]QK`WMbb`kur©ÃÏ¢Ú¦«âª²é¯ºë®¿ïµÂõ¹ÅöºÇ÷½Çú¾ËúÁÎúÁÏú¿ÍúÃÓúÁÒúÁÑú¼Òú¾Öú¿Òú¼Ñú¶Ê÷±Êó¬ÈòªÆé¤Áç½ß»Ø·Ò°Ì°È~¬Å{¬Ãu«Är¨Ár¡¶n¥´r ·rÂr Åw¡É£Î¥Ð®Ø¥®Ò«´Ó«·Ð¡³Ê´¨tªg `W[[[_bk§Â£Ø­¯âµ¸á°¿à©¾× »Ö¶Ûµ·ïºð¤ÌãÆàÁð¯Áú»Èú»Ìú»×ú¶Óú¬Ðø¬ÍúµÈù¸Íú·Êú·Ïú¹Îú¹Îú»ÍúºÑú¾Ðú¼ÐúºÓúºÒú¿Òú»Ñú·Íö´Æô­Çï£Ãæ¡¼Ý·×±Ü³Þ¯ß³æ§¸î¬¹ö·Àú¼Éú¾ÐúµÓö¤ÑæÆá¿àÀäÁåÂãÃá¡Àâ©Àæ®½ç¹¼è¼ÁèµÅáÆË»¬o¯bb`W__i~¶Æ§Ì¬Ï­Ò®Ó­Ò¬Ñ¬Î¨Î©Ê¬Æ¥Ä¤Ã{¦È¤Í©Ð§Ö«Ö¬Ù°Ù®Ù²Û±á¶â µä¦¼íª»ð²Àó¶Âô·Åô·Çó³Æò±Çñ°Ãï³Áï¯Âê­¾èª¿Þ¤»Ý µÛ£³Ö ²Ñ ¯Î¬Æ¨Á¦» ³¬©zkg{]{lUx`Qo_DdUQbQK`KD[QF[OBYOIYOFWK=[OK[OI]SK]UD]SIWKD[KF]SF]MD`OK[SMWOF]MD[SIYSD[OF]MKYQK[SI_OK[MI[OI]OK[OKWMI[WQ]WKYSFbUF_`Yk~w¤´ ¨»¡³¿¦·À¥»¿¦Á¾¥ºÁ¥¿¾¤½º¥¼»¡»¿£¾»¤½¼¢º½¤¿¼¥¼½¥¾¿¢¹»¥º¾¢½¾¤»½¦¼½¥½¾¥¼¼¤½¾§ÁÁ¨½¿¨Â¿¦¼¾¤»½¨½¿¨¿¿¥¾»©¾Á¦½Á¦¾Á¥½Á¨¾½ª½½¥¼½¦½¾§¾À¥»¿¡¾¾¥¼½ª¼¿£¿¾§¼Á©À¾§¿¿£»À¦½¿¥¾¿¥¾½¦¼À§½¾£½¼§º»¤»¾¨¿»¤¼½§¼º¢»½¦¼½¨¼º¦¾¾¦¹À¦»½¥»º©¼½§»º¥¾¾¥»¾¥¸½ ¼»¨¾»¦¸½»»¥¼¿§º»£»º º»¢¸»¥¼·£»»§º»¡¼½¢½À¦»º¦»·¡··§»º¤¸¸ ·¼¤¹º·¸¤»·¡º»¡¹·£¼· ·»¥·¸¤º·¤»¼§»¶ ¹¹£»¹¢··£¼·£¸¹£µ½£»·¢¹º¤¶º¢··¢¹·¦º¸¢¹´¡´º§¸»¤»· µ·¤¸º¤·¹¤·¶ ¶· ¹» ··¥¶»¡·¶ ³³¢¹·¡µ¶¢·¹¹¹¢¶¸¡·¶¶³´¸ º¶ ³¶µ¶´¶´·¡°²µ´µ· ´·¡·²µ·µ¶¢µ³³µ´·¶·µ¶´µ ´°µ¶·· ¶·´´³·±µ¶±³´¶·¢µ¯³³´²²³¡²³¶°µ°µµ³²²±³±³´³°³³´µ²³³²²µµ³°°´°°²±¯³³­°´²³±¯±³³°®®²®°¯°±²¯°±³±²­¬­¬°¯°­¯®¯||¡       ¡¡¡¡  £   ¡¢¢¡¡¡¡ ¡  ¡¥¡¢£ ¡¢ ¡ ¦£¢¢¢¦¢£££§¢¢££¡¤££¢££ ¨  ¦¦ £ ¦ ¡¡©£¤¥¦¥£¥¦§¥¦§£¡¥¥¡©¥¦£ª¦§£¨§¦£ª¢¨§¤¦¥£ª¦§§¥¦¨§§¦§£©§¨§¦§©¦©¡¨£¨«¨§©ª«¦ª©§ª§¨¦¦ª©«¥«§¥ª¬©©©¨«¨©©©§£¢lzUYDtI8bM?WI:O?5SD8MD=MD5MF:MF5K?8OD3IF:IF:MD5QB8KF=IB8OI:MK:QD=UI:MB5OB3OM:KI=MB5OD:MI5I?:MM=QM:OI=SK8QKDUQ:YYQ[uig¢z¸ÎÖ §Ü¤«â§´é­¸ì¬¿ñ³¿óµÁø·Æø»Äú»Éú¾Ìú»Ìú¾Ëú¾Ñú¿Ìú½Îú¾ÎúºÑú¹Ïú´Ìú³Êõ¬Æñ¡Ãí¾æ¼ß·ÖµØ°Ñ­Ô{±Ö­Ö­Ó©Ì|ªÆx§Éx¦Èt¡Èz¤Ë|¥Õ¨Õ©ÙªÞ°Ü©³Ú«¶Ý©µ×·Ê³¯i¨`YYW][`¢z½Õ©Û£³à¢·à·â¸á¸ã·ê»í«¾ó¥ÄïÂì¢Äð¬Ãú¹Éú»Ëú¶Ñú­Îø®Ìö²Èø®Èø³Èú³Êú¯Çú±Èú²ÊúµÊúµÉú¶Ìú¸Êú¸Êú³Íú·ËúµÇø°ÇôªÇí§Áæ¾Ý·Ø°Ó®Ö¬Ü«Ý¬á¡²è¥³ò´½ú¹Ãú»Èú³Ïö£Ìð£ÉñÆó¡Äó£ÆóÆïÄìÁêÂé¾ç¾ä£»æ¦½Ý»×·Ê|°»t«»q¤°n¤£b¢d¤i¬w½Í¥Ô«Öª×¬Ñ¯Ò¬Ï¨Ò©Ô©Ò©Ê©Ì¨Ì~§Î§Ï§Ñ¨Ö¬Ø­Ý¯ß°á±ß±â´ã·ãµè¤¹ì©¸î¬¼ð³¾ñ°Àó²Áó¯Áò´Âò®Ãí¬¾è¬½è¥»â§ºß¥³Ù²Ô °Ó¯Î«Ç¤Ä¥½¶°©|¢ogd~|WwiOoUIlWDgQ?YK?YI:QM:OF=S?8SF8II?KD8OF:QO5MD8OO:OD:Q==QI8MF:OD:SF?MB:OI:UF5QI:OD?OI=OK?QB:QI:SM=QI8UD:QM8SK=QM8OI?SI=UI:UQDYdkl¬¸¬¶´·¸º ·¹ºº ¶¸¸·¸··ºµ¶··¶¸ ·¸·¹ ¸ºµ¼¡¸º¡·º£µº¡¸º¹ºµº¡¹º¡¸¹¡·½¢»·º» ·» ·º·»¡»¼¡¸¸¡º¸¢¹»º»»»¹¸´¹¹»¢»º¢·»¡»º¢·»¥¸ºº½»º¡¶¼¡¸» º¶·º¡·¶¸º·º·¸¢¹·¡µº¶¶µµ·¼º·µ»·¸ ¸¸¸º ·¸º¼¸¹·¹·¹¢¸¸¢µº£·³··¶···¢¶··µ¶´¶¶¶´¶¶····¸¶´µ·µ³·¡·³¶µµµ³´³³´µ³¶³µ·· µ¶ ´µ³¸¡³¶·²°³´·²·´´µ´±·²¶²³°°³²·µ±´³³±µ³¶³²³µ³´°²±³³³±³²³²°³³²²³±®µ´³¯±¯³³³±²¯³³±²¯²®°±°°®´²­³µ¯¯¯®²²®³²³®¬¯³°°±°±³­°³²¬®°°°¯®°°°°¬­¯¯°²³®°¬¬¯¯®®¬®±«®±¬¬«¬©¯¬¬«­®­«®¬«¬®«­¬¬«­®®¬­­¬¬¬«¬©¬¬¬ª«¬¬«®©¬¬­®®ª«¬¬¬¬ª«©¬¬ª©¬¬ªª««©©ª­¡¡¢¢   £ ¢¡ ¢ ¤ ¡ ¥¡¢£¢¤¡¢ ¢¦¢ ¡¤ ¢¡¢¥ ¤¥£¥ ¢¡§ ¥¢¥¡£ ¦£¤ ¢£§¡¥¥£¦¢¥¢©¤£¡¥¥¨¤¢¤¤£§ ¥¤¥¦¨¡¥¢¤¤©¤¨£¨¡§¦ª¨§¨¨¥§¤¦¥«§¨¤¨¥ªª¤¥¤¬ª¦¤ª¤§§©£©§©¦¨¤©¥©¥«§§¥ª©©¦¨¥¬§ª§¦¦©¤¦¥®©§¨ª©©©¬¦­¥¬§¬ªª©ª©¬««ª¬¨¬ª¨¥«¬­¬¯©±¦«­°«­ª®¬«¬®¬®¬®««ª¯«®ª­©±­¯©¬¬®¬¬«®¬°®®¬®¬¬«±¬®«°«®«®¬®©­¬®­²¬³°­­¯®²­¬¥¨z¤bbMOFrWFfSMdMB_MBYSI[KI]IFYMF[KD[FDYSDUKIWMD]UD]QDWKD[UDWSF_SB_SIYUK[Q=_KDWUO[KB`QI_SFYMDYWF_[I[MF]SDYSO[YM`[Wgutq§»Ð¢×¨­âª´í²»íµÁó³Åõ·Ã÷¼ÇøºÉú½ËúÃÎúÄÎúÁÓúÅÏúÃÕúÄÓúÅ×úÂÓúÆÕúÃ×ú»Ðú¼Ôú³Îú¬Îõ¦Ëñ¢ÆïÂìÂî¿ì¾êÀì¿è½â¹á·ÜµØµÚ¶Ü³Û³áµâµæ¶æ¸ê£·ë¬¼ë¯Áé¯¿äÁÙ¾È´»t¯®w®¸¨º¬º|¯Á¨Ì­Û³ã¢·ë ¼ìÃïÂðÁïÃò¥ÃöªÈ÷¯Êú¯Êú²Ëú´ÐúµÏú¿ÓúÁÐúºÖú³ÓúµÍù³ÌúºÎú»ÍúºÎú·Êú¶ÒúµÍú¸Îú½Ïú»Îú¹Îú¹Íú¸Ðú·Îú¹Îú³Ìó®Éô¯Æí¥Áâ¾Ý¶Ù³Ù³à³áµä§´ê­¼õ¸Áú¿ÆúÁÌú¼Óú³Ïú¸Îú¸Ïú»ÒúµÐú³Ôú­Ðú«Ìú©Îõ¡ÊôÈðÆî¤ÅìÄçÀâÀá»âºÙ»×¹Õ³Ó³Õ³Ö°Õ´ß¶à¶ß´Ü¹à³Ü³Ü·Ü·ÛµÚ±ÙµØµ×°Ü³â³Þ¶ã¸ë¡¸ì »ë¤»é¦»ï¨»í¨Ãï¨Âï­Áï±Áò³ÃöµÆ÷¹Ê÷»Éö¸Çô¹ÊóµÆó³Åï¯Ãç­Áä«»å¥¼à¤ºÚ¡µ×²Ð®Î¬Ç¬Á¦»¡·«¬qrbw[xbQubSn`Mb[DiSD[UM`MF_KI`SF]OFWQF[OD[SFYMIYSK[SD]KI_SFWMF[OD`OF]OIYOB]WF[QF_UD[QFYOK`OD_UI[UI]MI]KI]SI_SM`QI]SD_QK_UMb[Qbbbo~­· ¬»§µ¿¢»¾¥»½¨¿Á§¼¿£¾½¤À½£¼À¢¼»¢¼»§»½¤¼¹§¾¼©¿¿£¾½¥»¿¥¾Á¦¹¾¥¾¼§»Á¦»¼§¼À¨ÀÁ§»¾¦¾¿©¿¼§¼¾¨¾¼£»¾¥¿¿«¾¿¥¼¾§¿Á¢¾¿§¼¾¨¾¾§½¿¤¿¾¥¼Á£½¿©»À¥Á¾©¼¿¦»½¥»¾¨¾¿£¾¾§»¾¤º¿©»¼¦»½¥¾¼¥¾¿¦¼¹§¸¾¤¸¾¤À»¦½Á¤¾»£¾¾¤º½§¼¼¢¾¼¥ºÀª¾¼¦¿½£¾¼£·¼¦¼¾£»»£»»¥¼»¤º¾§½¼£º»£º¾§¹¾¥¹º º»¤º»¤·»¡»¹¼¸¤¸º ¼»¥¾»¥»·§»º£º¼¡¸» ¹¸£¸¼¢¹¸¢º··¸¤·º¤¹·º¸¹»¦··¤¹»¤¹¹¤·¹¦º¹£¹½¢»·¡¹¹¸¹¢·»¢º·¡º¶¥¸¶»¸£·¶ ·¹¡¶¹»»¤¸·´³¡·¸¸¸£µ¹¶¸¶·¥¹·¡··¢´·¶¶··³¹¢¸µ ¸· ¶·¤´µ ¹¶¹µ·¶µ´´µ¢³µ¢¶µ¹µ£±³£´µ¹´ µµ·µ ·¶¡µ¸¡´µ ¹· µ·µ³µ´ ³´²³¡³µ´³¢³±·¶³· ´³ ¹´µ´¡³²µ³³³³³ ´³²³ ²±³°³²°²²²³´³µ³±°³®³´¯µ³²°²´¯´³³´®±²±²¯±¯±²³´°²±±µ°±³²²¯®­¯³¯±°±±°°¯±±¯²µ|¡ ¡¡¡¢¡  ¢¡¡ ¡¡¡£¡£ ¡£ ¡¡¤¢£££¢ ¢¢£ ¤¡¢¡¡££¢£¡¢¤¢¥ ¢¡ £¦ ¤¢ ¥¤¤£¤¢§¡£¢££§¡¦¥£§¥¥¡§¤¤§¥§§¥£¦¥ ¥§£§¢¦§©§£¦§§£¥¥¥¤§£¨¦¤©©©ª¥¥§¨¥¨¥§§¨¥§§©¦«©«¥¬¥ª©ª¥«§©¨ª¦¦¤¬¨©¨¬§ª§§¨«ª«©«©«¥§£¢w]`FzI:fM5WD=SD=OB:QD0OB?MF5S?3KD:SD5MF=OI3OF0UF8QI:QF:QM:MF:KI:SI=OI=MD?UD5QF:QI?S?0QD=KD8QM:WI:WI:SB:UK=SQ?QSF`qkgx·ÊØ¥Ü£¯æ©°í°¸ï±½óµ¿ò·Çø»ÆúµÊúÁÆúÀËú¾Ðú¿Ðú¾Ïú¿ÐúÃÒúÀÒúÂÒú¿Òú¼Óú´Ðú®Ñú®Íø©Ìù©Èö¥Äó Èô Ãò¢ÁðÂò¾ï¾ê»ä¸â¸á¶à¶â·áºä¸â¸àµä¼ç¹é½ç»é£»ì ½ä»ãºÝµÝ¶à·àºÛ¼à¹ã·ç»æ»ï¡Âó£¾ñÃó ÄöÄó¡È÷ªÇù°Çú´Ìú³Íú´Ìú¶Îú¶Ðú·Îú´Ðú±Ìø²ËúµÊúµÇú·ÊúµË÷®Êõ¯Çú®Çú±Æú´Çú³Çú°Êú´Êú³Çù³Ëù¯É÷¬ÄõªÅî¤ÄèºÞ»Ô³Ó²Ô¬Û¬Þ ­à ²æ¥³ï°¹õ·¾úºÇú¹Éú²Êù³Ëú¸Ìú·Íú¶Ïú²Ëú¯Îú¨ÌúªÌ÷ªÊö¢ÈõÈóÆñÅèÃçÁå ¾í¾æ Áâ¾ê½áºÜµÚ·Ý·à¶á³ã¸ä·à¸âµß³ÜµÛ³Ú±Ù²×¬Ù²Ù²ß±Ýµä·è·ê¡·ì£»ê«Àñªºî«¾ï©¿ñ®¿ï¯¾ò±Àó¶Ãó¶Ãô·Æõ´ÃôµÅð®Ãí­Àêª¾è§½â¨¹Þ¶Ù´Õ³Ð¬ÍªÆ«À»¡¶®«|¢zqg{[{qQqbInYFgUB]MB[K:[F:UI:U?:UB8OD:QF5OF?QD:OD:MF=QI?MD=U?:MI:KI=SI8OB:MF=Q?5SKBOK:SI5SD:OI=OB?UD?OI:SD:QI:SK?QF:WI=OK=QK?WK?SQI[nrq­¡µ¯»²»¡¸¹¡·· ¶»·»¡·¶¸¸·º º»¶¸ ·¸º·¢¸·µ¹»·»¸·¸¸·¹»¡¸¸¸¼¡ºº¢»»¡¸º¡º¸¸¸¡¸¸¡¹» »º ¸º¡µ¸·¸ ¸»¢º»£¸º¸¹·»¡»¼¡º»£¸º¡¹¸ ¸º¡·¸·¸¸¸¡ºº¡·¸·º ¸¸¶¸·¸·¸¹¸·» µµ·¹¸º¡··³·¶¹¸»¡··¹µ·· ¶·¹··· ³··· ¸·¢···³·º¡¸µ¸¶·¹´·¡³·µ¸µ··´·µµ¶µ´µ·¢¶···´µ³·´µ·µ³²³´·³´·³³³µ³·³µ³³³¶µµµ³´³²µ³µ·²²µ³´´¶°³®¶³³²µ³´±°±³±²³³³³²²±³³´²²²´°²®°²­³²°³³²³²²³²°³±°­®¬°²³²®®±²±­®³²°³±­°°­°²¬°±¯²²°³°°­°¯®°¯­¬®°³®±°®°­°±¬¬±¬®®®¯®¬¬®¬°¬¬®®¬¬­¯¬¬«­¬ª®®¬¬²¬ª°¬­¬¬¬­­«¬§¬®§¬©«««¬¬¬ª¬¬¬­¬««©¬¬¬ª««««¨«ª¬«¬§¬¬«¬©  ¡ ¢¡¡ ¢¡ ¡   £¡£¡¤¤ ¡¡¢¢ £  ¤¢¡¤¢¡¡¢£¡ £ ¥¢¤¤¦££¡£¦ ¢ ¥¥ ¤¡¥£¨¦¦¤¤¥£§ ¢£§¤¤£¥¥¦££¥ ¥¤§¦¤¦¦¡¨§§¡©¦¤ §¦¥¤ª¥¥¤ª¨©¥©¦¦¡«§¥¤§¤§¤¤§©¦ª¥¬¨©¥¨¥©¥ª¦©¤§§«¦¦¦ª©ª¨ª§ª¦¬ª¦§©§«¦§¦®¦¬©¨©¬¨©§¨¤®¨¬¨«ª­ª­«¬¬¬§ª§ª©¬§®«©©¯¨¯­¬¬³ª«­«©«¬¬ª¯©ª¨­©¬¬®¬°«­¬­¬®«®ª®¬­ª®­®¬¬­±¬°¬¯¬¯¬°¬°­¬®¯¯¯«³°±®®®°©­¤§{dfS[KlSB`OKbMI_MF]MBWKIYMB[MBYSF[MDYSI[OI[QF`MIYQD[SB]WF]WK[QFbSK]QIUWMbSB]OM[SI`QD[SKYOD]QFYSMYWI]SD[OM[WI__Wi|ro®¾Ð ¢Ü¨¬ä¬¶ì³ºð·Àô¸Áù¹Èú¾Êú¾Êú½ÌúÁÍúÁÒúÃÓúÈÓúÆÕúÆØúÉØúÊÛúÈÙúÈÚúÄØúÃÙúÁØú»×ú·Õú´Ðú³Òú®Îú°Êú­Íú­Ìú¬È÷§Æó¡ÈñÂñÇî¾êÀíÀíÁíÅïÂïÃðÄô¤Æô¥ÅôªÆö¨Èó¥ÄñªÊøªÉù®ÌôªÊô¬ÌõªÇð¤Èï¥Ãò¢Äó¦ÆöªÊø­ÈúªÊúªÌ÷«Ëú¬Íú­Îú¯Ïú·Ðú¶Ðú»Ôú½Õú»Õú»Õú¹ÕúµÒú·Óú¹Îú¹Ïú¼Ïú¼Ðú·ÏøµÎú´Ìú·Ìú¹ËúµÌú¶Ìú¹Ðú»Íú¹Îú·Íú¹Êù³Éö­Èñ¨Æî§Âà¿ÙµÕ³Û±â µá¥´æ¥·ì¬½ò³¾ô·Äú¹Èú»ÍúºÎú¶Îú·Òú¹Ðú»Ôú³Îú±Òú®Ñú­Ðú®ÒúªÑù®Îõ©Ê÷£Íú¥Î÷£Íõ©Êó©ÆõªÊó«ÈòªÆñ§ÅðÄñ¡Æï¥ÁìÁìÃí£Áé¾í¿ê½è¾ä½á¹ã»â¹á¶ß·ã»ç¡»é£¾ï©¼ñªÁô®Äó®Åô°Èö³Æö³Èõ³Çö³Åõ²Æö¶Æ÷¸Çö»Èú¸Ç÷½Ê÷¹Èõ¶Èò¶Ãð°Æë¬¿åª¿â¥»Ý£·Ü¶Ö¤¯Í­Ê¬È¨¾¥»¤¶³§¤~qf{[xiSwbSqfQi]OfWI`QF_OK]QFWQD]KKYOB[OI[QDYYDYSKYQF`SF`KF]SMWMI_QBYQK[SF[OI_QK[WI[QF`QI[OFYMKbWD[OI_SD`SM]SF]OD`MK[SK]OIfUK`YQ`inq¯ µ¢¯½¦¸¾¥·¾¦º½¦»À©»¼¥»¼¥½¿¥¾¿¦½º¡»½¤»»¢½¼¢¾¾¥»½¤½»¤¼½¦»½£¼½£¼¿§½¿§¿¿¨½½¥½¾§¾¾¥º¿¦¼¿¥½»¥À¿§¾¾§»¾¥»¿§¾Â§»¾ª¾¿ªÁÀ§¾¾¨¾¼§¼¾§¾Â¥¿¾§¿¾¤»½¦¾»ª½À¦¾Àª¾¾£»¾¨¾¾¨»»¤»½©Á½¥º¿¥»¼£À»§»¾£¾»¦¾½§¾»¤»»¢¼º¥»»¢½¼¡½¼¤½¾¥¼º§½¾¤¼¹¨½»§¼¼©¾»¦»¼¦¼» »¿©º» ºº¦»»¡»¼¦¼¸»¾£º¼¢¾¹¥»º¥¹»¢º· »»¤·¸¡·¾¢»¸¤¹¼¤º¸ »·§¹· ½¼¡ºº ¹»¢¹¹¤¼¶ ºº¤»º ·º¡º·¢¸·¸´·»¢»¸ µ¸¡··¦¼»¡·¹º¹ ·¶ ¸º¢º·¢¸¸¤¶º¸¸¡¹·¤¹¹¡¹¶·¸£¸º ¹¶¸¹¡·µ »¶¶¸¡´¹»· ¹· ³¶ ¶· ·¹¸¶¢µµ··µ··³¶´ µ¶ ¶µ¢¸³ ¶· ·´·¹¡µ¶µ·³¶·¹µ¶´³³·¢´³£¶·¸¶¶µ µ´µ³²³²²³·±±¢³³²³¶µ·±´³¢³³³µ ´³³µ·²³³³´´°µ³³³³³²°³´°³´¯²®®²´² ³³²´³²³°¬±±®µ³¯³²¯°¯¯³ ³¯¬²®²®±®±²±®«°±±³±¬¬|~{  ¢¢¡ ¢¡¡¢  ¦ £¢¢¢££¡££¢£§ ¢ ¢¤¤¦¡£ ££ £¢¡¡  £¢££¤£¡£¢§¤¡£¡£¢¥£¤¤¡¢©¥¤¤¡¥¦¥£¥ ¥¤¨£¦¥£££§£¨¥¢£¨¡§¥©£§¥¦£¦£©¡§£¦¥§£¦£¨¦¨¦©¦¨§©£ª§©©©¦«£«§©¦©¥¨¥¨¥§©©¨§¥ª¥ª¨ª¨«§«¥¨««¦¨§©§ª¥¨¤w_`O|O?nI5_D8UI:OD:QB=OF8KD=OB5QD:MK:MD3UK8QD?Q?5OD?OI?OK8UM=QI=SF:UO=OK=QQ?WO:UO=QK5[I:UK8QF:QD8MK?QF:QI5WK?UUQbzgk¥|¾ÍØ¢¥à§±êªµí²¼ò·¾ò²Æ÷·Ãú»Æù·Êú»Èú»Ìú¾ÑúÁÐúÃÏúÁÒúÃÒúÆÕúÆÓúÃÖúÃÕúÄØúÀÖúºÔú¹Òú³Ñú²Ëú³Ïú­Ëú­Ìø«ÉøªÊ÷¡Èõ¤ÆñÃïÁñÁìÁî¾ïÁòÃð¡ÃñÃòÆõ¤Çõ¥Çõ¦Æö§Ê÷ªÆ÷­Êø³È÷³Ëõ²ÌøªÄù¥Èõ«É÷£Êø¤Èö¡Éô£Ç÷§È÷¨Èõ¡Çö¡Ê÷¦Ê÷§Éú®Ìú²ÌúµÎúµÐú¹Óú»ÓúµÒú¶Ðú²Ìú²Ìú´Êú·Ìú¶ÈúµÉù°Êõ±Èõ¯Æù¯Çú³Èú²Ìú³Èú°Æø²Éú°Èø­Çù°Ç÷«Äó¬Ãð ¿ìºâ¹ÔµÎ©Ò«Û­Ü®ã¢±ç§¶í©»ò°»ö³Ãú³Æú³Æ÷´Ëú³Ìú³Ëú´Îú¬Ìú«Îú¬Ðú¦Ì÷¢Ëõ¡Íô¡Éô¢Êô¢Æò¢Æó¦Çô£Åò¥Æõ¥Çõ¨Çõ¦Æò§Åó¨Ãð¢Ãï¡ÃëÃê¾ìÀé¿æ½ç¸ã¹äºà·â´àµá·á³âºè¡¹î ½î§¾î©¾ò¨¿ô¯Áô¬Ãò­Ãô¬Ãò°Çò¯Ãò±Âó°Äó³Äõ±Äð°ÁòµÆô´Ãñ³Åî¬Àê¬½è§»á¥¹Û ³Û³Ô¯Ò¬ÌªÄ¨Ã£ºµ®«¥tri[tWt_KnWIdSDbYDUI?_K5YIDOB8SD=U?:MB=SF8QF:OK:MF=YF=QM:UI5UF=SM?QF=UD?SD5SI?SD5QI8SB=UB=UODMD?SK:SKBSI5U?:QK?OI:QF?QK:QMDYD:WQBYQUdzª­£³°»µ··µ»··¸¶¶¹¸·¸··¡¶³µ·¶¸¸¸º¹··¡¹·¹»¶º ·¸¡¹¹·¼¢»·¡¹·¡¸·¤»»ºº ·¼·¹¸¸¶¹·» ¸¹¸»¢»¹¤º¸¢·º¢¸¹ ¸¸£ºº ·»¡¹º·º·º£¹¸¡¸º¡¸¸¸¹¸¸¡··¡¹µ»¹¡·¸ µ·º·¡¹¸µ´ µº¹¸µ···¶¹µ¶¶»´µ ¶³¡····¡µ¶ ···¸··¢¶µ ·´¡·µ¢µ³´·¸·²···´¸µ±¢·µ¸¶ ±µ·³³µµ¸ ´´´´³³±·³µ³º³³·´´³µ´¶´³·´³³³´·µ³³µ³³³´³³µ³±µ³³³´°°³²¶µ°³³²³³··³²²·±¶´²³³¯®±²²±¯³¯°³²°²°³¯µ±²²°®°°²³°±°²®¯±°²´²±°­±¯°¯¯°¬²®°³®²¯°¯¬±¯²°±µ«¯²¬®¬®®°­¯²­¯®­¬®°­®®­®®¯°®¬¬®®¬®±¬­¬¬«¯¯­­ª¬¯­©¬¬°°¬¬®¬¬­¬­¬ª¬¬©©¬¬¬¬¬«¬©®ªª¬¬¬¬««®«§¬¬¨¬«ª¬««¨¨©«« ¡¡¡¢  ¤ ¡¢¢¢¢  ¤££ ¢¢ ¢¡ §¡ ¤¡¡ ¤¢ ¢¤¤¤¢¢¡¤ ¢¤¡¤¤¨ ¦¡£¢ ¦ ¤¥ ¥¨¥¦¡¢£¢¥§¤©¡¥¤¤£¤¢§¥¤¡¥¥¦¢¨¡£¢¥¢¥¤¨ ¤§§£¨£§¥¦§§¥ª¥¤ ¦¥¨§¨§©¨©¨¨«©¨¨¤¨¥¨¨«¥¦¦¤¨¨¦¦¦¨¥¬§¨©ª§«§¨¦¬§«¤¨©¨ª©©«§ª©«ª®¦ª¦­£«©ª©¬¦¬¦«¨¬ª©©¬©¬¨¬¬­§¬«««¬«¬¬­¦­¬®¨®ª¬¨¬¬¬«¯¬°¬°ª¯©­©®©±¬°«­«¬¬¯«¬¬°«®¬¯¬®¨­«ª¨²¬¯¬¬®²«®­¯¬«¬®£¨inU_MuMDfOF`OF_MF[QB]MBYO?SO?[KDSQD[OB]QF[MK]SBWQK]UI[WBSYI[OB]OD_WI]YO[]Ff`K__KbYI`QIbSI`MF[OF]WDYSIYSIbYO`f]lxt°ÃÓ ªß¦¬è­·í´½ð·Âó½Åø»Éø¾Êú¿Ìú¾ÎúÁÒúÃÓúÂÒúÇÓúÈÕúÆØúÈÙúÈØúÊÜúÊÜúÊÚúÇÜúÅÛúÂÙúÀÚú¼Øú¾Õú¼ÕúµÕú³Õú´Òú°Óú¬Òú­Íú©Ë÷¦Ê÷ªÈö¦Ç÷ªÌ÷©Ç÷©ËøªÈú¬Èú¯Îú¬Íú²Íú³Ðú´Óú¶Îú¶Òú¶Óú¹ÓúµÔú³Òú°Ðú°Ïø¬Ïú¬Êù«Î÷©Ïù©Îú§ÐøªÌ÷ªÐú®Ïú²Òú·×ú¸Öú¾ÖúÀÖúÁÛú¾Øú¹Òú¶Óú»Óú½Òú¾Îú½Ñú½ÐúºËú³Ì÷®É÷´Ìú´Ìú¸ÌúµÊú¸Ìú·Ìú³Íú´Îú¶Êú´Ëù¯Êø°Íò¨Ãî¦Áç¾Ú¼Ö³Ó¯Ü ¯å¡³é¥ºí©»ð¬¾ò°¾ø°Åú¸ÈúºÌú¹Ðú»ÐúºÒú·Õú³Öú³Òú´Õú¨Õú®Òú¨Óú¦Òú¨Íø¤Ìô¡Ñö£Ìö¥Ëõ©Ì÷¬È÷®Éô¦Éö¬È÷­Ìö¬Éó§Èô¨Çó£Æò¢ÇíÂê ÁëÁé ÀèÁæ Áê ¾é¡Áé¡¿ì§Àï§Áò¦Æò®Åó²Äö°Èö²Èø´Æ÷²Èø·ÌöµÊ÷³ËõµÉöµÆ÷µÉó·Ëó·ÇõµÇô·Ëô·Çò¶Çñ³Æî³Ãë«Àæ§»ä§ºá¢·Ö±Õ ±Ò¬Ì­Å©Á¦¹ ·¬¨zxb{]{nUx]MtbKn_QiWQd[KdUKYQ?bOB_KK]OKWUI[SK]YF]UD`WD]UIfWF_]MbSD`MF`QK_SF_UKbSK_UK_[D`UK`WM]QDbQD]WM_QK`QF_SFWSD`MI[UI[YK]QI[WM_]Mgx{ª¸ª²²¾¢·»¥¹»¢¼»¼À§¼»»½¤¾¼¥¼»¥¼¾¡º»£º¿¤½º¤¼º¥º¾¦»¾£¾¾¥»½¦»º§ÀÀ©¾º¢¼¾£»À¥¿¾¤½¿¥¾½¤»À¤½¾¦¿¼¥¾¾¤Á¾£»½¨º¼§»½¢½½¤½¿¥»¾¤¿»¤¼¿¨¼¾§¿¿¤¿À¤º½¢¾¾¦»¾¤¼À¨¾»¦¾¾¥»¾¨¾½¢½¾¥»¾©º»¥¼½¦½¼§¾»¥º¼¥À¼¤¼¼¡¼¼¤¼¼£¹º¼¼¥»º¤º»¦¼¼º¿¦»½§¼»£¼¿¡¹¾£½¼ »¹¤»¼§»»¥»»¤»¼¥¹º¡¹»¤¼¹¡»»§¼¼¤¸» ¹¹¡º· ·¾¡»¸¶·¤ºº¢º» ¹¹ »¹ ½·¥¸»¡¼»¢¸¸ º·¢º¶¤¸º¡»»»¸¡µ¹ºº·¸¡»·¥··¸¹¹º£µº¢º¹·¶¢º··µ¤·· ¸µ£¶·º¹¡·º¶¸¢µ¹·¶ ¹·¶º ¸º¤¹·¶º ¶·¡¹·¹µ¥¹·´¶ ·¸¸··¸¡´³ ¶µ·µ·´¡¶µ³µµ¶³µ¶³´·¶¶³³´·ºµµ³¥¸³·³µ´ ´³µ´ ´¶³´µ´³¶³¶³±¶²¡µ³³µ³±³²³³¸¶³³²±³²°°´³³±³³³¯µ³²µ±­³´°³´¬´°¯°±³³±±³±³°°®³¢±³°¯°±°²°¬±±°°°¬´¯­³³¯¯°±°°®³²³­¬~    ¢ ¡ ¡¡£¡¡ ¡¡¡ ¡¡£ ¤¡¡ £¡¡£¤ ¤£ ¢¡£ ¥¦£¢¡£¢¥¡¥¢£¥ ¥¥¡¡££¡¢¡¡££¡£¢££§£¥¡¤§ ¢¥¡£¥¡¥¥§¢§¡¢¤¥£¨¦¤¦¦§©¦¦¤§¤§¢§©¥¤¥£¥¢§¦§£©¥£¥¥¥ª§¥¦¦£ª§¦§¨¦§ª¬§©¤ª¨©¦§¦«§§ª¦¦©¤ª«¨¨«£©¨¬¨¬§¥¦¨¨©¥¤z¡iiSU?nFBbF:YD:QF8QD5O?:QF=KI:K?8MF:KI=SI:MK=OM:UI:UK?OI=SF=OQ=SO?WMDYSDU[D_UF]YDYQ?]F8YO5QI?UF5SM?SK?UF:WSDYk`dqt±ÄÐ ¢Ø£«ä­±ç®·ï³»ð¸Áô¹Äö¹Åú»Çú½Èú¹Ìú¾Ìú¾ÎúÀÐúÄÒúÅÓúÆÖúÃÓúÃÓúÃÓúÄØúÁÕúÀÖú¾Óú½Òú½Óú¹Ôú·Òú·Ñú¶Ðú·Òú¯Îú­Ïú¬Êù«Êö£ËöªÈõ¢Èó£Çö¨Äø¥Éø¨Çø¬Çú®Éú°Ëú®Ëú²Êú®Ðú²Ïú³Îú³Íú®Ðú¯Ì÷°Î÷«È÷¦Èö§ÌöÈõ¢Èö¥È÷¤Êø§Ëù¦ÌúªÌú²Ðú¶ÏúµÓúºÒú½Óú»Öú¾Ôú·Òú³Òú°Îú¶ÈúºÌú»ÌúºÎú¶Èø®Êô­Æò¬Åö¯Æú³Çú³Èù±Èø³ÆúµÄú±Êù±Èù±Æø®Æö°Äõ±Äò§Ãì£¾å·Û´Î±ÌªÙ¬â¢«æ£²ç¨³í¥»ï­¸ò¯¾ö¯ÂøµÄú·Çú·Èú¹Êú±Ñú³Îú³ÑúµÒú±Óú¬Òú­Òú¦Ïù¦Íù¢Ìô¢Èó¢Èó¥Åò¢Æò¢Ãñ¡Äó£Äñ£Ãñ¤Äñ¢Ãï ÃñÄîÂì¿ê»ì½ç»é½è¾æ½é¼è¹ê¡Áí¥Áí§Àò©Ãò­Äö²Åö±Æ÷¬Ëö°Çö°Ãõ°Èö³Æ÷µÄõ±Æô³Æó±Æó²Âð¯Ãï°Ãð²Ãï°Âî°Àé¬Áë«½å©¸ã£·Û¡²Ú³Ö¯Ï«Ê«Å¦Á¡¼¶¬¬|£zuid|zUtfOk]FgWKdYF]SBYO=]K=QMBYF=YD:SI?OK=QQ?WSDYYDYUDUYF]YD[UB]UB[SFUK8YMBQM?WI=UMBYMDQK=UFDSM:QI=UKBWD?QD:WD?UI8QI?SI?OO=OIB[IBWM?Wdok³´ª³±¸³·³¹¶··¹ ··¶¸¶¸¡¸¶·µµ¶····µ¹£¸·¢¹¸¢ºº¡µ»···· ·º¢¸· »¹µ»¡·¹»¼£¸º··¸» ¶»º·¢·»¡·»¡µ¸£·¸¸»¡·¹¡·»¢º» ¸¸¥¸½ ¸¸¢¸»º¸·» º·¸·£µº¢·º··¡·¸ µ¶£¸¹·½¡·¹µ¹£¹¹¹º¡´¹·»£·º···´ ´µ¡·µ·¸··¶ºµ··¸¹µ¶»¡··¡¶¶ ´¶²´²·¢µµ ·¶¯¸ ¶¶¶·µ·µ·µ´·´µ²²µµ·²´µ³³µ¢··µ´µ·³´µ´³³²²²µ·³¢°²´´³³²³¯³´³³³³³·°²³°´´°°´³³³¶²³°³°²³³¯³´°²²®´²´µ²­°²´²²²³´°²³±°²°²°®²¯±³°±³®²¯°°°²¯®¯°³±°²°¬²¬°¯°­¯°±®®­®¯¯«°¯¯«¯¯­®¯³²­¯¯¯®³¯±®­°²¯«¯®¬±¯¬­¬¬°¬¯®««­¬ª©¯«¬ª­­¬®¬¬­«¬­®­«©¬©«­¯¬«¯¬©«­¬­©¬«©ª¬§«­¦ª©©ª§¨¬¬¬¬­­ £  ¦ £¢  £  ¡¤¢¡¥¤ ££¡  ¢¡ ¤ £   ¡§£¤ ¡£¤¥££¦¤¤ ¤¤¥¦¥¡¤£¢£ ¢¡£¢¡¦¤ ¦¢¦ ¢£§¡¦¢¥£¤£¨¤¤¤¥ ©¥§¤¥£§¨¨¨§§¤¡¨¥¥§§¥¦§§¥§¦¨¦¥¦©¨¨¨ª¨§¦¦¥§¨«§ª¨¨¦¨¨¬¦«©§¦¨¨¨¨¦¦©§¬©¨©ª¢§¦¥§ª§ª©¬¨§¨¬§¬§©ª¬«­«©©®¬¬©¬¨¬°©©«©¬©¬©­«¬««¬°¨«§¯¬°«±ª¬­¬­²«®«ª¬­©³­©­¯­®¬¯¬®¬²¬©§®¬¯®°­¬¬®¬¯«®®¯­­¬±¬°®¯®­­¬©¬¤ªuu]dM|SKoMDbMF_QD]O?[KI[Q?[M?_KBYQKYSF`W?YUF]YI]WF[WK]M?[OD[YKb[Df]KinSlkOrlMqiMkdMkSDfWD]UM_WD`UM]SD_SD`]MdtgqµÉØ¡ªà¬°ê°·ì³»ð¶Áó·Æú½Æú½ÌúÁËúÂÎúÃÐúÃÓúÁÔúÃÖúÉ×úÈÖúÃÚúÈØúÊ×úÅÜúÈÚúÇØúÆÙúÄÜúÂ×ú¿Øú¿ÚúÁÙú¼Öú¿Öú¾Øú»Øú·Øú¸ÒúµÕú±Óú®Îú°Òú®Ðú®Ïú¯Íú±Ðú³Ðú´Îú²Ðú·Ðú»Ðú¶Óú³Òú¶Òú±Òú¯Ôú±Òú®Òú«Îú©Ñù¨Îú¬Ðú«Ðú­Ïú­Îú°Òú·Óú¶Õú·Öú½Öú¾ÚúÁÚúÁÙúÁÚúÀÕú¾Öú»ÔúµÑú½ÐúÁÒú»ÏúºÐú·Ðù³Ìõ³Çú´Æù·Ëú¹Êú·ÍúµËú¶Ìú¶Êú³Ìú¶Êú´Èú¶ÍúµËö´Æô¯Êñ¬Äé¾âºÕ±Ñ¬Ø¡³á¦³ë¨·ë¬·ñ­¼ñ®¼õ±Áö³Æú¶Èú·ÆúºÍú¼Ìú»Ðú¿Òú¿Öú¼Õú¼Ùú¾Ûú¼ØúºÛúµØú¯Õú­Öú¬Óú¨Ñ÷¦Î÷¨Î÷©Ï÷§Êô¦Ëö¨Êõ¦Æó¥Éô¥Æó¦Çò¥Åï¡Äï¡Æñ£Çñ¥Åð¥Æð¨Åô¬Æ÷®Èö¬Æö¶Êú¯Ëú´Êú¶Îú·Ìú»Ìú·Íú¸Ìú»Ëú¸Îú»Êù¹ÌúºÎú¶Ê÷³Êô±Çô²Çõ²Çò´Çò³Ãï´Àð±Ãì¯Àë¬Àã§½à¢¶Þ§¸Ø ³Ó³Ð®Ê«Ã§¾¡¸°±©¡|tg~[{i[wbIq]Mk`Qb[Mf]Md[Kb[OdSM]SF`WK[YKbbF_dUbkUfiMgnSggSidOgdOdbSd_Ig[M`[IdYF_]Kb]M]YFbSK]YB]QB`WM[SD[QF`SK]UIWUK_SI_SF]QK`QK]WI__bi{³ »¬¹µ¶¡¶»¤¹»¡»»£¹»¥º¿¤¼»£·»¤º¼¥½½£·½¤º¼¡¾ºº¿¤»½¦¼»£»¿¦½¼§¾À¦¾¿¤º¾¤»¼ ¼¼¥»»¦»½¤½¿§¾¿¥¾½¥¾Á¥º¿¦À¾£¿¾¤º¾¥»¾¥¾½¤½Â¥»½¨½Á¨¾Á¦¼½¥¾º¤»¿§¾Á¤½¼¦»¼¡»¼¢»»£À¾£¼¼¢»½¤¼½¥º¼¢¼º¦¾Á¤½¾¥¼¼¨»½¤»¿¨»½¥¾»£»»¥ºº¤»½£¹½¢»»¤¼½¤¹¾§»½¤»º¥»º¢¼º¥¹¼ ¼¾£¸¼¤»¸ »» ¹¹¡¹»¤»¹ º»£¹º£¹» »»£¹¹º¸¢¸¸¤·¹¢¹· ¹»£··¢·¹¤»¹¡º¹£¸» ¹»¡¸· »·£¸»¤¸¹¡¸¸¤»¹¤·¹ ·»¹·¢º¶·¹¡»·¢µµ µ¹¡ºµ¶»¤¶¶¸·¡´»¢·¸¢¸¸¢·¹¸¸··¶¹¢´·¶¸ ·¹¡µ¹£·³·· ¶· ³·¶º¡³¸·¹´¶·µ ³³·¶ ³·´±³· ¶¹ ·· µ´ ³´µ¶µ¶³µ¡³´³µµµ´³ ³µ´µµµ³³µ³³¸ ´³³³³³³·³³¯³±¶´³µ³µ³µ±³·³°´³³´³³°³´³°³³®¶³³°°³±³¯³³¬±°²³²¯®¯²±¯¬°³¬°±­³®±³¯¯°¯²¯±¯±®®³±³°®¯°¯³¯¯°³­||    ¡¢   ¡¡¡££¢¡ ¡¡£¤ £  £¢¦ ¢¡¢ £¡£¢¡££¤ ¥ ¢¡¡ ¢¡¢£¡¤£¡¢£ ¡¡§¤¤¤¥£¦¡£¤¥¤£¤§¡¥¤¥¨¥¢¦£¥¥¥£¥¥¦§¥¦©§§£¥¤§¦¥§§¤¦§©¦©¤«¤¥¦¥¦©¢§¨§¤©§§¤ª©¨¦¤©¦§©¥§¥§¥©§ª§©©¬§§¥¨§§¨«§¬§¨§©¥©¨©¨«£¦tz]]FzQDkK:[D=YFDMD?O=5SF?MI=QD=QMDMM?QI?UM:OM:QM=UI5QI=QI:[YD`nSd`wb|_{QxIrgIgQB`I?`IBQM=YF8UIFQM=WYK]rik|{·ÇÔ¦Ý¨®â®°è°´ì´½ñµ¾ó¸Äö»Æú½Çú¾Êú¾Ìú½ÍúÀÑúÃÒúÂÐúÁÒúÅÔúÃÐúÄÖúÆÓúÂÕúÄÕúÁÕú¼ÔúÁÔúÀÕúÁ×ú¾Õú»Öú¼Òú»Óú¾Òú¶Õú·Õú·Ñú¸Ïú³ÒúµÎú¯Ïú°Íú²Îú®Îú®Ðú²Îú®Îú¯Ïú°Îú¬Ëú­Îú®Îú¬Ìú©ÎúªÍú«Ëú©Îú¬Îú«Îú­Ðú®Îú®Îú²Òú³Óú´Ïú¶Õú¸Óú¿Óú¾Õú¿Øú½Ôú¹Öú·Òú´ÎúµÏú³Îú·Ìú»Ëú»Ïú¸Ëø°Æò®Æñ°Ãô´Ã÷¯Æø³Èú¶Çú°Èù´Çú²Çú¬Çú°Èú³ÆúµÈú´Èö®ÃñªÅëÀä¸Ý´Ò±Ë¬Ó©Ù¬â¥°â¤³è¥»ë¦»ï¦ºð«¾ö°Àù´ÃúµÇùµÇú¹Èú¼Îú»Óú¼Õú¾Öú¾Öú»Öú·Õú·ØúµÓú±Óú¯Ðú­Îú©Íú©Ëö§Éö¦Êô¢Êò¢Æò¡Æñ¤Èó¨Æï¥Âò¥Ãð¤Âñ§Æñ©Äñ¦ÃóªÄò«Äõ«Æù±Èú³É÷²ËøµÈú·Éú·ÍúµËúµËú³ÎùµÈú·ÉùµÌö¶Êö´Æ÷µÇõµÄö²Ãô³Æñ­Áï­Áí¯Âï¬Áê®¾ê©¾å©»æ£»ß£·Ù´Ö®Ð¬Î®È¥Ä¤¾¡½µ¯~ª|¡xqib|xStdKk]IdUMbUD_OD[QFYQ?_O?UQ?YK=SU?QQBU]F[[K`iU`fO]gM`fM``M[_QdbM]YI`UB[[KYSD]QD[SDQQ?WI?UF:QI?SI?SI?MI=OI=OI:SK=QD=QFBQK?SI:UKBUOO]bti³³®´µ°²³³µµ· ³··³´¶·µ¶¶·¹¶µ¸·µ»¡·¶µº··µ· ¸¹¶º¥·¹ ¸·µ·¢¸»¡º¸¡¸¸¸¼¤¸»¡··¡·¸µº ¶¸£¹»¤¶» ¶¹·¸·º »»¢»·¡º»··¡¸º¸»¢··¸¶¡º¸¸µµ¸·¸ º·£µµ¸¸¡·¹¡¹¹·¸¡³¸¡¸¸¸·¡¶¸¡¶··· ¶·¶µµ¶··µ³¶´³···³µ·µ²· ¹µ´·µµ³¶¶¸¡µµµ·µ¸¡µµ·²µ¶³µ²³´µ´¸³³³µ³·´µ³··¶µ³µµ´· ´µ³²·±³··³´³ ±µ´³³³±³µ³²³³³°°°³³¶²±´³°µ±³³²³²°²²²³³³²°²¯®®³°µ°³¯°°¯³°²°³²³³°­±°°±®±®°­®­®°°®°°°®°³¯­³­°²²¯³®°²°¯±°­®­°­°°°¯°®®¯­²­¯®¬««­¯¬®¬­®¬¯®­ª¯«¬®®­¬©¬¬¬¬¬­¬¯ª®­«ª²«ª²¬®¬­«°­«­©¬««ª©§©®©«ª«¬ª«§ª«¬¬¬«­«­©¬ª«©­«­¬¬§¡¡ ¡  ¡£   ¢  ¤ ¡ ¤¡¡   ¤¡ £¡ £  ¡ ¢ £¡£§¢¤¡¡ ¤¢¡¦¢¤¤¡¤¢¤£¡¥£¤¥¥£¡¡¢¢§£¢ ¥¤¡¢¥¥¦¢¦¤§£¤¥¨¢¦¤§¤§¢¦¤¨¨¡¥¨©¦£¢¤©¤¥¢¨¥¨¥©¨¨§§¥¦§©¨¬©¦¦ª§¨§¨¨¬¨§¤©§«©«¥¥¦ª¥¨§©§©£¨§«§©¤ª£¬¨§©«§¬¨©¬¬¥«ª«ª¨«¬§¯¥ª«¬©¬««¨­©ª«¬«¬©««¬¨­«®¬­§¬©ª­¯ªª¬¯§¯­«©¬©­®«­¬­¬¬®­®¬¬¬¬®­¬®¬¬¬¬©¯¬®­²­±­°¬¬¬¯²®­®®ª­®¬®¬®ª¯§iqW_OuUMnQDbOK[QB]ODbOF[QFYSI[WK[SBYUI[WB`YI[SB]SD[[Fb_Yllu°ÂÄ»¸w`]|kMrYFl[OfWDfYD_YM[[Kff`knu ¶ÏØ¢¬á¬´ë°·ï¶½ðµÂò¸Ä÷»Çú¾Êú¾Èú¿ËúÂÔúÂÓúÅÓúÅÕúÆØúÈÕúÈØúÆ×úÆÕúÆ×úÄÛúÈØúÃÛúÄÛúÆÙúÅÛúÈÛúÃÜúÄÜúÁÛúÂÙúÁØúÁÝú¿Úú½ÖúÃÛú¾×ú¾Ùú»Ûú¼Öú»Õú¸ÖúºÖú»Õú¶×ú·Òú¶Øú¸×úµÓú¶Õú³Ôú³ÒúµÓúµÕú±Õú¶×ú·Öú¸Öú·Øú»ÖúµÖú·Øú¾ÙúÀØúÃÙúÄÝúÈÞúÁÝú¿Øú½Ùú¹Öú½Òú¸Õú·ÑúÁÒúÀÑúºÐú·Ïø³Îö­Çö³È÷µÉú´Ìú·Èú·ÌúºÌú¸Ðú¶Ïú³Îú³Îú¶Îú»Íú¶ÌúµÌó¬Èî¨Äê¤¾â¸Ø¶Ó²Ñ¯Ø¤­ä§´é©¸ë¨»ì©ºï©¼ò­»õ±ÁøµÃú´Æú¸Ìú¾ÌúÁÐúÊÕúÆÖúÃÝúÃÙúÄÜúÁÞú»Üú»ÛúºÛú¼Ûúµ×ú¶Õú²Öú°Òú®Ðú±Ïú¬Ì÷¬Í÷ªÌú¬Îø¯Êø­Ìø°Èø°Ëú±Ìú´Íú±Êú³Ïú·Íú½Îú¹Îú»Ðú½Ñú¾Õú¿Öú»ÒúÀÓú¾Òú¼Òú¾Òú¼Òú»Ïú¶Ðù¸Íù·Éø·Èø¸Êô³Èó³Äò³Æð¯Âì°Âì°Âì¬½ç¦¼â¢ºÝ³Ý¶Ö ³Ð²Ì­Ì¬Ã¨¾¢¹²¬~§~zqi`iUwlSrbOgdOg_Kf[MdWKb]M_[D`UK]`Kb]MbdSffQglWknWilSfgSfiWioWiiWfiWigWbfYd`Oi_Mg]KbWK]QF_YK[UF_SD]SFWSI_QB]S?WQF[QD`QKYWI`QK[UF[UMb_`n´ º¬»£·»¹¹¹·¹º¢·» »¹£º¾¡¹» ½¼£·¾¥»¾¥¼»¤»º¡º»¤º»¤»¼£»¼¦¾À¦½¾£ºÁ¤½½ º½¦¼¾£»¿¤Ã½¦»Ã§»Á¦¾»§¼Â¦½¿¦½¼§½¾¥¼À¥¾¾¦¾¾£»¿¨»½¤¼¾¦¿¾§½À§·¼§»¼ª¿Á¢¾¿£»¿¤¼¾¦¾¾ ¼»¡»¿£¾º¦º¼¥»»¤½»¥¼»£»¾ ¼»©¼¾¤»½¥»¼¤»»¦¼¼¦»¼¤»»¥»»¡»»¢¹½¤»º¦º»¥º¼¥º¼ º»¢¸»¢¶»¤ºº¥º»¤º¼£¹¹·¿¢¹º¤¶»£»»£»¸¤º»¡º·¨»»¤ºº¤·¹»¸ ·¹¥¹·¡º»£·¹¥·º¤½¹ ´¼¢¶¹¡»¼¡º» ¸º¢º¸·¹ ³» ¹µ¡·¸¢µ¶¢·· ·¸¤¶¶ ´º£·¹£·º¶´¡³º£·¹ µ·¡¹·£¶¹ ·· ·º¡·¸¡·³¶·¡¶µµ·¡¶·¢·¸¤·µ´¶¡¶··¹ ¸º ´³¢¶··µ¢µ¶µ¶ ¶¶µ¶µµ··´µ³µ´µ·µ³µ ¶¶ ¶³µ·¶³µ¶¶µ³´¶³²µ³±²´µ¶³µµ³³´³³±²´µ±³²µ²³³³±³´´¯´²²±´²± ¯°²²µ·°³´²°³ ±±²³¯´²¬¯²®³±²±¯³°®±¶°°®±¯®®´°¯°°¯²±¯²­±±°¬°°±²¬¯||£   ¢¢ £¡¢¡¡¢  £¢¡¡  ¡£¡£¡¡££¢££¡¢ ¤¥£¢¢¡£¡ ¢¤¢¢ ¢¡££¡££££¤¡¤£¤¥¤¡¦ £¦£¨¡¦¡¤¦££¥ ¦£¨£§£ª§©¤§§¦£§¦¥¦§¥ª¥ª¢§¤§¨ª£§¦¥§¥§¨¥ª¥§¦§£©¤¨¤¨¡¦¥¦¥©¤«§¥§¨¤©¦©§¥¨ª©ª¨¦©©¨«©§¨«©¨©©¦©¥§~¡itSUFtM?dD?YF8QD=OB8KF:OB=SD:SK8OK=KK=QD:UI=OI=YD:Q]M`kf°ÆÐÊÉ¼l]OqWDkK=_K?WD=[IDWQOY]Qbln{|¶ÆÔ¢£Ý©®â­±è±¸î±»ð³¿ô´¿ö·Áù¹Äù»Äú¼Ìú½Ìú¿ÎúÃÎúÁÑúÃÒúÀÒúÆÒúÀÒúÂÔú¿ÔúÂÔúÃÖúÁÓúÂÙúÅØúÁÖúÁÖúÇØúÃ×úÁÙúÄØúÁÕúÀØú¾ÔúÁÖú½Ùú¿Ôú¾Öú»Õú½Øú½Ôú»Ôú¹ÓúºÓú·Óú·Òú·Òú·Ñú³Ðú·ÓúµÓúµÑúµÓúµÎú·ÔúµÕú·ÒúµÑú·Ôú¶ÖúºÔú»ÕúÁÕúÄÙúÈÙúÁÙú¾Öú¼Öú¸Òú·Ïú²Ðú³Íú¸Ñú¸Ëú»Ìú»Ìø²Éð«Ãò®Ãó²Æô³Âø²ÆùµÈú±ÈúµÇú·Êú³Ìú³Îú±Ìú²Èú³Ëø³Èõ¯Äñ§Ãé¢¾ã¡ºÝ¯Õ²Ð¬Ï«ÑªÚ¡¬â ±ä¤·ä µè¡¸ê£¶ï¬¹ô®¾õ®Á÷°Ãù¶Åú¼ÉúÃÎúÅÕúÅÖú¾ÚúÀÙú¾Ùú¼Øú½ÙúºØú¹Ùú¸Öú¶Óú²Ñú³Õú±Ðú²Îù°Ìù°Ëù®Í÷¬Ëø°Ëú¯Êú°Êú³ÊúµÎú³Ìú·Êú¶Íú·ÑúµÎúºÐúºÎú»Ðú¾Îú¼ÐúºÏú½ÐúµÐú»ÑúºÎú¸ÎúµËú·ÊöµÉöµÈò³Äó¯Æó­Ãð®ÃïªÁì«Áèª¾èª¸ä£·àµÜ°Ù­Ó®Ñ¬Ê¨Æ¨Ç¥¾ ¸³«~¦zzoibzwWtbKnUKg]IdUD`WF]M?UIBYMDUOIUM?YMDQYIWUDWUDWdKY]I][D[[FY[Of]K`fQ_`M_]IdUF[UI_M:YF=WI:SI5QF:QI=OI?OD:UM=KI=SF:QI?MD?U?=WIBQIBUD?YIDWSQ]tzq´§´±·³±²³·®³²²µµ··µ´µ¡´¹´·¢·¹¢¶··µ¢´··¹¶·¡¸¸···¸º·¸¸·¶¤¸»¡¸» ¸· µ¸¢¸·»¼¦·½ µºº¸¡µ·£·¹¸·¡º¸¡·º¡·»¢¸» ·¸ ··¢·º¸¹¡º·µ¸³·¶¹¡¶·µ¶¢··¡µ· ¹¸º··¸·¹¤¸·¢·¸¶·µ¸ºµ·· ³¶³·¡µ· µ·¸¸³···¸³´·µ¸¡µ´·¶´¶·¸·³ ´´³´¶¶³·µ·¸µµ·´³µ²´³²µ´³·µ¡´³³´µ·³¶²³³µ³µ±³³µ®´²µµ±°°°³´³¯²²°²³³²±³´²³²²±³²°°°±³²­µ´±³³²´²²²±±´±®±²°³°²®¯¯±¯±°²³°°³°®³°²²¬±³¬°°®®¯±°³¬²°®¯³¯¯°±°°­¯¯±®¯°®²°®®¯²¬²¯¯®®°²­©¯®¯¬¬®¬²®¬®¬­¬®®¯­««¬­««®«¬¬«¬¬¬ª­­ª°®­¬¬©­«ª¬¬«ª®«¬ª¬¬«¬««¨©¬«ª©¨««¬¨ª®«ª¬©§¬«©¬©§¨ªª­¡  ¢ ¤¡ ¡   ¢¢ ¡£ ¢ ¡ £¡  £¢£¡¤ £   ¢ ¥¡£¥¢¡¡ £¦£ ¤¡ ¤¤  ¡¤ ¤£¥¡¡¦¡¦¡¥¦¢¦¢¥£¥¤¦££¥¥¡¦£¨¡¨¤¢¦§¤¤¢ª©¥¦ª¦§£©¥§§©¤¦¦¦¨¨¦ª¤¨¦¨¥©¢©¨ª¦¨¢¨¦¥§«¤©¦¨§§¥©¥¬¥§©©£§¤¨¨¨¦¬©ª¤©¨©«­¨¬¦ªªª¨ª¨««¬ª¬©¬¬¬©¬¬­¨«¬©¨¬¬¬«®ª¬¨¨«®«­©­«¬¨®¨«¨««¬¬¯«¬¬¬§¯¬­¬¬ª¬¬««ªª¯¯®¬¬«¯¬­®®­®ª®¬¯¬®¬³®®­±«³®¬¯²¯²®¬®¬«®¨¨wbnU[DuSDgUDYM?]Q?[QBWSI_MFYU?[SKWSB_WB]SF]WIb[Odko¬|ÅÏÐ¢Ê§Ê´­²z`iKz`Kl`MdSFbYM_`Sbl_low¦¼Î¡Ù¤¨Ýª²è­·ìµ»ðµ¾ò´Â÷»È÷ºÈø»Éú¾Ìú¿ÎúÂÒúÀÐúÆÑúÂÓúÃÓúÆÕúÃÔúÅÛúÄÙúÆ×úÆØúÇÙúÈÛúÆàúÆÛúÄÛúÈÞúÊÜúÉÜúÆÞúÊÝúÇÜúÆßúËÜúÇÞúÅÝúÆÜúÈÝúÁÝúÁÜú¿ÜúÁÜúÁÜúÁÛú¾ÚúÀßúÁØúÀÜúÀÜú¿Úú¿Üú»Ûú¿Ùú¾Ûú¾Üú»Üú½Ûú¹Ûú¾Ûú¾Ùú¿ÛúÄÞúÊáúÉÞúÇáúÃÝúÃàú¹Ùú¹Øú¶Òú³Óú¶ÑúºÐú¼Ïú¿ÎúºÏø³Ëö°Çö°Êô²È÷¶Çú´Ìú·Íú·ÌúºÍú»Òú¾Òú¹ÒúµÔú¹Ðú·Ðú³Îú°ÈôªÅï¤Àé¥¿ã»Ù·Õ´Ñ­Ò°Þ¥³ã«²ä¥·ç§¹è£¸í¤»ïª½ó­Ãö±Æù³Èú·Èú½ËúÆÐúÊÕúÉÚúÃÜúÈßúÃÜúÃÞúÃÝú¿àú½Üú»Ûú¼Ùú¼Ùú¼Úú»Öú·Øú¸Öú¸Õú·Õú¹Óú½Óú»ÒúºÙú½Ôú¾ÕúÀÕú¿Öú¾ÖúÁÖú¿ØúÁØúÃØúÀØúÃÓúÂ×úÁÕúÀÕú½Óú¼ÕúÀÑú¿Ðú¼Òú»Îú¹Ïù·Î÷·ÊôµÉö³ËôµÊò­Æï­Ãì­Àëª¾ë¨¾â¡»Ü ´ÛµÕ°Ó®Î«Ê¬È¦Á¢º¡¸²ª|©|xni~[|iUrbSqiSlgMk]Of[O`SFdUM[[KdUK_UD`YI`QIb`O`bMb`Md_IbdMdfMkkSku]iqSq`KgYKd]K_SD_SI]QK`OD_SI[QD[QDYSD_UMUKF[MF[YIWUDbQKWYK_OB]UIbSK`[Qdruo¤´¤¹£¶» ·½¡¹·¹·¹µ ··¹º¾»¢»» »¼¥½¼¤»»¡»»£»»¦¼¸ ¹¼¡¸½¦º¾¤½¾¢º¾¥¾¾ ¼½¤½»¨¾½¢½½¢¾¿¦½½£¼½£½Á¢»¿¥½»¢½½¤»¿¦¼½¡ÀÁ¤¾¾¦¼Á¨¼Á¥¾½¥¼½ »¿¨¿½§½¾¡»¾¥¹À¦¹º½»¢»½¤º»§º¹£»¾¢¼½¡¸½ ¾»¤º¾§»¼º¾¡¼¿¤¾º¥½»¢¼¿¦¹¼¡»»¡º¼£¶¼¤¹»¤º½¦¹º¢¼»¤»½¤º»¥¹»¡¾¹¢»¼¢¹»¥º¹¦ºº¢¼¹¥º¼¢¹»¤¸»¡¹¹£¹»¢·¼¡¸·¢»½¢·º ¶·º¹£º»¦¹·¡·º¢¸¼£¶·¸¹¢¹¹£···º ¸·¢·º ¹º·¹ ¶·¹º·¹¢··¸¶¤¸» ·¹»º·º¢¸¶¸·¡¶¸£¸µ³´ ¶¶ ·¶£·¹·¶¢¶¸¶¶ ·· ¹¸¹µ³¹ ´·µ¶··¶´³¶´µ¡³· ³· ·³¶¸ ²·¶´µ¶µµ·³³µ³µ¶°³µµ¶³³±·¡´¶³³³·³· ³³³´±¶³°±´¶³³²³±±³´³³²³µ²¶³µ³³¯´®³´°²¯°¯²³ ³°³¯³±°³®³³³²³³°³³³³¯°¬±±®¯³²±®¶°¬°®®±­±²®°­¯±°¯¯¯±±¯¯¯³±±°¬±~ ¢     £¢¢¡£ ¡  ¦¢¡ ¢ ¤¡¥¡¢ ¦ ¤  ¢¡£ ¢¢ ¡¥¦£¥£¢¤££¢£¡¤¢££¡¤¢¥¢¥£¥£¦¢¦¡§£¥§¦¤§ £¦¤¢§¥©¥§¥§§©¥§£¥£ª¥¦§¥ª¦©§©¤§§¨¨©¥©£ª¤¥©«¨¬©¥¤¨§ª¥©¦«§ª§¦©§¤«¥©ª¨¦¨£©¥§¦ª©ª¥ª¤¨©­©¨¦¥£¥xnqQ~QBoI=_B8U?8WF=M?:QI:QD8QD:ODBQK:MF5QK=WQFU`Sbrq¶ÁÀÁÂ¹°·Â|_]Dn[IbSDWOB]KB[YIYgYdgr |»ÊÒ£Ù¦®àª³ä®·ì³¸ì³¾ò´Áõ¸Áö·Äù¹Æú½Åú»Êú¾Ïú¾Ëú¾Ïú½Ðú¿ÑúÀÍú¿ÒúÁÒúÃÔúÃÓúÅ×úÄÕúÆÙúÃÚúÆØúÆÛúÆÜúÈÙúÈÙúÄÚúÇÙúÆÚúÅÛúÈ×úÉÛúÄÛúÃØúÃÚúÂÛúÁØúÁÙúÁÛúÃØúÅØúÁÖúÂÙúÃÚúÀØúÁÖú¾Öú»Ûú¸Øú½Öú»Øú»Øú½Ûú»ØúÀÚúÃÖúÅÜúÆÞúÄÜúÆÜúÂÜú¼Ôú»Öú·ÕúµÐú²Ðú®Ïú³Ìú·ËúµÈú¶Æú´Éõ¬Êò«Çò¬Ãõ®Ãó°Æ÷´Äú±ÈúµÌú·Êú¹Ìú¸Îú¸Îú³Ïú³Ìú·Îú³Êö«Êï§Áç¥¾ä¹Ý´Ô³Ð°Ñ«ËªÔ«Ü®ß°Ü°ßµã±è£·ï¦¹ò©»ö®¿ø²Åú¸ÅúÄÎúÁÏúÄÕúÄÖúÅÜúÄÛúÃÜúÁÜú¾Øú¾Ùú»Úú»Õú»ÕúºÕú»Öú»Õú¹ÒúµÔú·Óú¹Ðú¹Óú»Óú¾Ñú¿Ôú½ÓúÂÒúÃÓú¿ÖúÃÒúÃÖúÁÖúÃÔúÁÓúÁÓúÃÔúÁÓú½Óú¼Ñú¼Òú»Íú¹Íú·ÍúµÊøµÊô²Éô±Èò²Äô®Ãï­Âí©Áë§¿ä©¼å¥·â¹Üµ×²Ô¬Ï¨Ð¬Ì¥Æ£Á ¼µ±¬¨z tri_|wUtgQq]FdYO`]FbQI`Q=YO=YI?UM?YO?WQBWO=UOFYKBYUBSUDSSD]U?[_M`iQdtQfoQg_DgF=]MBYK?QI5WI:UM?UI:SD?QD=UD:QF=OFBO?:UI:UMBSI8SF=SKDUD?UIBWQDY`ng¬³«·®µ³µ³±´±³²³µ²µ···¶µ¸µº·¶ ¶·µ·¸·µº´·¢µ·¸¸¶¹ ¹¸ µ·¸»¡¶·µ·£¸»¡·»¹¹·º¸·¸¹¸º¥·¹¡¶¸ ·º¡¸º¸¸¹¶¤··µ¸ ¶¸¡µ»¸¸·µ¶·¡·¸¡¸·¶´¤´¹¹¸ µ¸¡··¡¶··´¢µº¤··´²¢´·£··µ¹§···´··¶·¡µ¶ µ·¸µ µ³µµ¶¶¶¶·´³··´µµµ¶·³´´ ¶¶¡±³´µ··²¶³´µ³²²³³³´±³±²´´²¶³³´³µ³²µ¢³³³¶²³±³´²³³³°²µ²²¯¶²®³¶²±²³¯±³­²±³³´±³²³²²²²³³±°°²´³°³°¯¯²´²²²±±¯®³³°±°¯³³°²²®¯¬¬¯°±²°®­®°²®¯­®¯¬°²¯®¯®­°®°°¯¬¬°®­°®­®­¬®®®°®®¬¬­®±¬¬®®±¬«®«°¬¬¯©®¬­¬¯«¬¬§­®««­­«¬«®°©«¬¬©¬«ª¬©¬«§®®©¬©©ªªª­¬««©©ª«©«ª¬ª©§­¬ª¬¨«¬¨«¬   ¢ ¡ ¡¤ ¢  ¡ £¡¤¡£¡ ¤  ¥¡¤ ¢¢¡¡¢¡£ ¡¢¤¢  ¤¡¤ ¡£¥¢¤£  ¤¦ ¡¡¥¡¤¤¤ ¥¦§¢§¡£¢§£¥¡££¥¥¥¤¨¥¥¢¥¥¦¦¥¡¨§§¢©¥¤£¢£¥¥¨¤¥¦§¨¨¦§§¤¥¦©¢¦£¦¥©¤¨¥§§¥¦§§§¢©¤§¤§¥«¨¦¤¨§¬¦¦§¬¦ª¨¨¥¨¤¬¦ª§§¦«ª©«¬¥«¦¬¬¬©©¦«ª©¬¯©©ª¨©¬ª¬©«©ª©¬§¬¬°©¬«¨©­¨­­¬«°«­¬­¬¬§¬¨®¬¬©««°¬¬©¬ª­©¬«¯«¯¬¬¬¬«­©°­¬©¬¬¬¯¬¬¬­®¬¯¬¯¬¯¬¬¯¬¬¬§ozW_Q|[FlQBiMDYO?]MD[SD_SB[ODYUFWWD]OB_OF[]Qdzko­ÄÃ»¬¦~²~¹Ë¸zWiOq_Ml_Kf]Md]KddSkr`ouw¨ÁË£ÙªÜ¦¯ç¬·é³»ð´¾ð´Ãó¹ÅøºÇú»É÷»Êú¼Ìú¿ÍúÁÐúÀÏúÃÒúÄÔúÃÓúÄÕúÃ×úÆ×úÇØúÄÙúÇÝúÈÛúÆßúÈÝúÊßúÌàúÈáúÌÞúÍâúÌáúÌáúÊßúËàúÐâúÍÞúËßúÊàúÊàúÇßúÇàúÊáúÈáúÊÜúÇàúÅáúÇÜúÈâúÆßúÆÝúÄáúÆáúÁÞúÆÝúÆáúÅàúÅßúÇãúËáúËáúÌâúÍâúÊâúÉàúÂÞú¼Üú¿Üú»Öú¸Óú³Òú³Óú³Ñú·Ïú¼ÍúºÌø·Ïö´Ìõ´Éø¶È÷µÆø³Êú·Èú¶Ìú·Îú»Îú¾Óú½ÑúÁÔú»Õú»×ú¸Ñú³Ðø¬Ìó§Èï¥Áê¼ã¢»Ü·Õ´Ô­Ð¬Ö¡±Ü¡¯Ý ¯ß ¶á¶ã ¶é¦»ð¦¼ò­¾÷²ÄúµÇú½ËúÂÐúÅÖúÈÖúÍØúÌàúÏàúËàúÈäúÈßúÂáúÁÞúÀßúÁÛú¿ÛúÃÜúÂÜúÁ×úÀÛúÁÛúÄ×úÆÚúÃÙúÃÙúÂÙúÃÛúÈÚúÆÙúÇØúÈÜúÅÚúÈÚúÇÛúÈØúÄÚúÅÚúÃÜúÃØúÃÚú¿ÒúÀ×ú»Ðú»Ñú¹Ðú»Ïú·Íø·Ï÷¶Êõ³ÈòµÇñ®ÂíªÁí¬Ãè¨ºæ£»á ¹Ü¶Ö±Ô®Î¬Î¬Ê¬Ä¥¾ » ³°­~¡{{nf`|nS|bMi[Sf`Od_Kd[M_WKbUMdUF`WO`_F`YKd[KbSIb[Kb]Kf]KgkMdoYidukxbztKr]DiSKbOB]SB`SBWQI_SD`QKYUI`QB]WBUUIYMD[UF`WO[MB`QKWOM]OI`QFYQKbfln±·®µ³·¢¸º º¸¡··¶·¡»¹·»¤¹½¤»¼£»»¢»½¤¾¾¤¼·¥»»¤¼» ½¼¡»½¤¹º¤¼¼½½ »»¤»»¢¾½§º½¦»½¥¾¿§½»¡»»¢º¾¡½»¥»½»¾§»Á¤»¿¢½¾¥»¾¦¾¾¥¾½£»¼¦¾½£¾À§¿¾¤½¼©À»£À¼¤º»¥½» ¹½§º½£¿»¡º¼¥»¾£¼½ »»¥¼¼¥¼¼¥»»¢¼¾ ¼»£»Á¤»½¦¹» ¹»¢¸»£º½¥»»£¹¹¡·¶»»¥¸¼¢·¸¹»¤ºº¤¸¸ »»¢¹¹¥»¸»¹£»¹ µ¹·¸ »º ¸» ·¸¹º¸º£·¹¡··¢º»£·µ¹¸¡·¹··¤º¸¡·µ¡¹·¡·¹¤¹· ·»´·¢·¹··¡¹´£µ¸·º·µ ··¸»¹¶¶¶µ¶³¹µ¸·³µ·¸·¶¶¡µ··µ¡··¢·µ³µµ´¡´¶µ·¸³¡¶µ´¶µ· ´µº³µ·³µ ´¶²·²³µ²µµµ´³´µ³´³ ±´³µ´·³´·³°µ ³´´±³²³³µ²³¶ ³³²·³³¯³³¯²³±²³³µ° ³³³±¶³®³³²²²²³°³±´´³±²³¯³³°³°³°°¯¯±±±³¬­°±®®¯²³¯¯°¯°³°±¯°±²­°®±®­­±®³²³¬°­°²®¯±|¡  ¢  ¡£¢ ¡  ¡ ¢¡ ¤¢¢¤¡£¡£¡ ¡£¡¡¡¤ §¡¥£§¢¡£¥¤££ ¡£¢¢£££§££¡¤£¤££¥££¢¦¢¢¦¦¡¥¤¢¡§¢¨££§¦£§¥¦£££¢£¨¤©£©¡§¥¡¦©¦¨¦©¤§¥©¥¨£¨¥©©§£«¤©¦£¦©¤¬¦£§§§©§ª§©§«§©ªª¨ª¨¨ª¨¨¦¦©©ª¥«¨ª§§§¨ lrU`IzQBdD=_M:UD?ODBSF5QIFUD?OI?QK?QM=QM=SWOYni¬»µr]U|_~q~¡{¨|[`Iz_Fd_DdOD]QDWQD]`M`kYgox§¾ÈÐ§Ù¤©ß§²ã¬·ë¯¸ì±»ï¬¾ò²¾ô·Áø·Æú»Äú»Éú¾Ìú¼ÊúÀÏú½Ðú¾ÐúÂÏúÁÔúÃÒúÇÔúÄ×úÃØúÇØúÈÙúÅÚúÇÙúÊÛúÆÜúÆÜúÈÜúËÝúÊÝúÌÝúÌÝúËÝúÊÝúÌßúÇÜúÈÝúÉÛúÉÜúÊÛúÈßúÌÚúÈÜúÆÛúÅÜúÄÚúÃÙúÃÚúÃÙúÂÜú¿ßúÂÜúÁÚúÄÛúÆÛúÇÜúÊÝúÌàúÌßúÆßúÈßúÃÝú½Üú½Õú·ÕúºÖú³Òú²Ðú®Ëú²ÊúµÇø´ÆöµÊ÷±Èó°Èð®Âò¬Ãô°Äö²Åø°ÄúµÈú¸Ìú¸Ìú»Îú·Îú½Ñú½Òú¸Òú³Ðú®Ïù¨Éó¢Åî¢¾æ »á·Ø¯Ò°Î¬Î§Õ¨Ï«ÖªÚ¬×¬Û®á²ë¢·ì©¹ó®½÷°ÃùµÃú¹Ìú¿ÎúÀÐúÇÕúÈØúËÙúÎÝúÉÝúÁÛúÂÜúÂÝú¾Úú½×ú½ÖúÁÚú¾Øú½×ú½ÖúÀÚú¿ØúÀÖúÃÙúÂÕúÂ×úÂØúÄØúÁØúÅÖúÄÕúÁÙúÆÚúÈØúÄÖúÇØúÁÓúÃÔú¾Ôú»Óú¾Ðú»Ïú·Ìú»ËúµÏù·Ì÷µÆöµÆó³Æð³Ãî«Äé«Àê¨¼ä¥¾à£¸ß¡¶Ü¶Ö®Ó«ÌªÊ§Ê£Å¡¿ ¼·°ª¤xunk_xQxgOnYIiWB_SIWOI]QI[WIQM=YOBYSDYSD`QDWUIWODYU?[U?W[I]dKbuUbkiow`rlIqO8`O?[F?QK8UK:SK?QI8SIBOK?SF:SD=QI?QI5QF=SMDMBBSI8SKDUK:QDB[K?UUU_z~t¨­§³°±¯²²µ¶²´º³³·¶²·²¸··¶¸³¶·¸¶¹·¶ ¶´·¶¶·¡····µ¶·´»¹µ···¡»¸¹º¡·º·¸º¼¥·¸µ·¹º ¸»¤¸»¤·»·¹£·» ¸¹£¸º ··¢µº¡»º·¸·º¡·»¡·µ¹µ¡·¸³µ¡¸· µ¹ ¶³·³¡·¹·µµ···µ¸¹µ·¸±¶·³´··³²µ·³µ¶µ³µ· ¶·³µ¶¶°¹ ³·¶·µ´³¸¶¶µµ±²´´µ·¡³´²°³´´´²³³²²µ³´²³°³°·³²³³±¶²±´µ²µ³µ³´³¯²³±µµµ´³°³¯°²²³³±°°°²³®³³®³³®µ²³³´²²³¯³±¯°±³³²±³±°´²²³®³¯®®³²±²²¯®¯®®°±¯°®°«°°°®®­®®¬¯¯®¬®®¬­°¯¬±®¯¯¬®®®¯®®¬®¬¬®¬¯­®«³®¬°¬©®¬¬©¯¬¬­¬®®¬¬¬®±¬«­«¬®¬¬­««±«©ª«¬¬¬«¬ª¬¬¬¬©«ª«¥«¬¨¬ªª«¬«¨ª«­§ªª¦­¬««­ª¨©¬ª¬ª¡¢ £¡¡¡¡  ¢¡  £¡ ¡¢ ¡¡ ¡££¢¢¡ ¡¡¤¡¤¤¡¥£¤ ¡ ¤¤¢¥¡¥¤¢§¡£¤¡¤ ¥ ¥£¤ ¥£¤£©¢§¢¨¡¦ £§¥¢¦¦¤¦¨¦¦¢¥££¥§¥ª¦ ¥¦¤¦£¨¥¥¦§¦¨¨¤¨£¥§ª¡ª¤§¦©¤¦§«¦§£ª¥¨¤¨¥§¢ª£¥¦©¤ª©©¥¦§¬§¬¦¨¥¬¨§§¨¥«¤¨¦«§©§«ª¬©ª¦©©¦©¬«±©¨¦¬¨ª¬§¬¬«¬¨««¬ª­¬¬¬­¦©©¯ªª«¯­¯¬ª©­ª«¬«ª­¬°¨­ª®ª«¬­¬¯¬¬¬¬ª²¬®¬¯­®©¬ª®®¯ª®­¯«®¬®ª¨{ irY`MwQIlSDdMF]MB`KD[SIWOD]SBWQD[SF_UD]`Wfrt³·¨k[UU|Y{kd~zUxbOqfMidKiYKbYQb]MiiYgodow{¨ÁÌÔ «Û¨®ã©´ç¯½í±¼ð¶¾õ³Æõ·Ãø¹ÆùºÇú»ËúÀÈú¿ÑúÀÍúÅÒú¿ÕúÃÐúÅÓúÆØúÇÛúÉÕúÇÛúÉÜúÎÞúÍÝúÈßúÌàúÌàúÊâúÌáúÍáúÑäúÎáúÒãúÒåúÓåúÏãúÓãúÐäúÐäúÎäúÏàúÎáúËâúÑáúÊáúÍâúÊáúÈßúÅàúÇàúÇÝúÆßúÆßúÉàúÇâúÆßúËâúÐæúÐâúÒéúÒéúÍèúÊåúÄÝúÁâú¾Ýú¼Úú¼Öú¸Õú·Õú·Ðú³Íú¹Ìù»Îø·Ì÷³Éõ³Êô±Èö´Æö³ÈùµÊú¹Êú»Êú½Òú½Ñú½Ôú»×úÁÓúÂ×úÁÖú½Ùú·Ôú²Òö§Èó¬Åè¦ÂãÁÜµÙ³Ó¯Ò­Õ®Ò®Ú®Ü­Ü³àµã¢·ê¥ºð¬½÷²¾ù³Çú¶Èú¼ÍúÁÒúÄÒúÇÖúÊÛúÎØúÌÞúÎâúÊàúÎàúÆâúÅâúÈßúÉÜúÈÝúÆßúÇßúÈßúÊáúÈßúÇÝúÊàúÈßúÇáúÈßúÊÝúÉàúÊßúÊÝúÇßúÆÝúÊàúÆÝúÈÞúÃÚúÄÚúÁØúÁ×úÂÕú¾Ôú¾ÕúÀÓú·Õú»Ìú¸Íú¶Ì÷¶Êõ³Çñ³Éð³Ãí®Áé¥Àä¥¹ä¤»Û·ÙµÕ¯Ð¬É«ÊªÉ§À¥¾·¡´®«{¢{uob|_zoSx[Oq_Ok]O_WMl[If]ObYIfYOd]M[]KfSMd]S__Kb`KdgOblSgrUnzbntt¢¡luS|Y?lUOdSI[QB_UB[WFYM=_OF[SI[QD[KB_YO`ODUMB_UK[MD_OB]QMYUFWOI`QD[[Odnzx¦·«º ±µ¡··¶µ¹´º¹¡¹·£¹·¶¹¹º¡·¸ ¹»¡¼º¡ºº¤¹»£¼»¢»» º¾¡»º¥¼¼¡»»¢º»¡À¸¡¼¼¤º¾§»»¥¼»¢»¼¤»¿¡¾¾£¾¾§»¾¤½½¤¾¾¥»¿¥¿¼©¾Á§¼½¨¿¼¦»»¤½¼ »»¦¼»§»½¤»¾¤¼¾¥¾¾¥¹·»¼£º½¤·»¤º»£º¿¤»º¤¾¼¹¼¡¼»¡»»¢»»¥»»¡¸½£»»¥·½¤¹º¦¸»¡¹¸£»·º·¢·¼ ·¸¸¾¢·¸¥»»£»¸£»º¢¼º ¸»¢¸»¢ºº¹º ·¶¤·µ¡¸¹ ¹»¡·¶ ¹»¡º¶¢·¸¹¸ »¸¤·´ ·º ·¹¶¹ ¶· ¸·¢º»¢·µ ¹·¢µ·¶µº¶¤·»»¸·º·¸¥¸µ¡º··» ·¸¢¶·´´ ·´·¶¡·· ´··µ··¤···³µ¸¢³¶ ¹´·µ¶µ³µ ´± µ·¡µ¶·³¡µ· µµµµ³·³¸µ³³µ ´²¶³µ³¡¶µ¹´µ´ µ³´´³³³³´³³µµ³´³±¯´µ±µ´¯³µµ¶²²´°¯±³²´´³±³²´³±²±®°³°±³°³³³®²³³±²°±¬±®®³±¯³¯¬±®°³ª¯¯²¬±³³²®­²¯°²²¯°¬­®°°±¬±°¯®­®³¯²²¬«¬¯±¬®~~~¡ ¡  ¡¡¢¢¢¡ ¢¡¢ ¦¡¡¡ ¡¡ ¥£¤¡¢¡¡£¥¥¤¡£¥£¢¡£¡  ¤¡£ ¥ £¡¦¢¥££¥¢¥¡¦¤£ ¥¡¦©¤£¥¦ £¢§£¥¥§¥¦£¨¤¥¡¥¤§§§§©¦¦£¤§¨§¨§«£©¥ª§§¦«£©§§©¨¨©¥©£©¥ª©§§§¤¥¥©¦¥§¨¨©¥¤¦©««¨©¤¬¦«¦¬®¨¥«¨©¦§¨¦wozUbMxODiM=[D8UD?UD:UDBSK=UK3SI:QK=QO?SYU`ng«{|¬n]MOzzKrzOtzOqtIo]KkUB`YM]]?YMB[UD]YK[YM`kYgrr£¾ÆÓ¦Ö¡«à¦­á§³ç©ºì°ºì²¾ñ°¿ó¶ÃôµÃõµÃøºÆú»Æú»Ìú»ËúºÎú¾Ïú¾ÒúÁÒú¿ÓúÃÕúÇÔúÄÙúÇÖúÊÙúÈØúÆÜúÊÜúÆÝúÌàúÍÝúËßúÎáúÎàúÌâúÌâúÎàúÐáúÌàúÌàúÎÝúÌàúÈÜúÊÛúÌÞúÊÜúÈÞúÆÝúÆÛúÃØúÃÝúÁÙúÂÚúÆÝúÆÜúÉÜúËßúÎàúÍßúÐãúÎßúÎáúÊàúÃßúÁÛú½Øú¶Øú¸Óú·Ñú´Óú°Íú®Éú°Êö±Æ÷¯Æô­Êò°Ãò°Áñ¬Áò¯Ãô°Å÷¯Åú¶Äú·Çú»Ìú¹Îú·Îú¹Ïú»Ñú¾Ðú½ÒúºÒú´Ðú³ÍöªÆð§Áä¡¾àº×´Ò¬Ï¬Ì©Í¨Ð£Õ¦Õ¬Ø¬×®Ý°à ®ë¦·ð®»÷°Áö°Æú¶Èú¸Ëú»ÎúÀÒúÂÕúÇÓúÇÖúÌÚúÉÜúÇÞúÌÜúÆÝúÆßúÆÙúÅÜúÅÜúÇÛúÇÛúÊÝúÆÜúÇÛúÊÚúÊÝúÊÙúÆÝúÊÙúÊÚúÅÛúÈÜúÄÛúÆÜúÅÙúÃÖúÄÖúÁÖúÁÔú½Ôú¾Ðú¿Ñú¾Òú»Ïú»Ìú´ÌúµËø³Êö²Çö²Æò³Áï«¾é¬Àê©½ä¥»Ý¡¸ÜµØ¯Ó°Ñ©Ê£È¨Æ¢À¾¸µ®ªw£wtli~b{uYnfOo]FgU=_UIWUK]Y?]OBYS?YMF[WD]WKYQDYWDYWIY_IY`I`lM`qOf]lqq££nuOwUBfM?]IBOO=SD=UM=QK?QI=OI:MM?OD:QIDWK?UI=SFBMQDUI?OF?OK=MDDQI:WSB[[gi²³«·³µµ·²´³µµµ³´³²³³°¯´´´³²³µµ µµ ³¶·¸¡·¸´³··º¸´· ··¸¹·¸¹¸¡º¹ µ·»¹¢µ¹¢¸¸£¶º ¶º£··¢»¹¡·¹¡¶¹¡¹º¶¹¸¶³¹·¶¡¹»¢·¹·¹»º¸µº¶····¹·¶· ³¶ ··¸¸µ·µ·µ·µ´µ·º·¶µ²¶²µ·¸¡´µµ·µ¶¶¶³´¶¶³·´µ¹µµ·´µ´·³³´³³µ²³µ²³µ²µ³²³¶³µ³²²³³·²³µ´ ³²±´±µ·²±´µ´²³²³´³²·²²´³³´°³¯±³´²²±µ³²²µ°²²´®³´®°²¬³´³³²¯°³¯²³°³°±¯±®²²±®±³±°³°³°°¬°¬°²±®°¯¯¯±¬®¯±®«¯¯¬®®®¬°¬®¬®°®«°¯¯­°­®°®®²¬®®¬¬®ª°¬­®¬¬­­¯®®¬¬¬­°¬¬¬««ª¬¬¬¬¬­ª­ª®¬ª¬ª¬©¬¬««ªª«¬©¬««¬«§««««¬§«ª¬­«©¬«¨©«©«§ªª¦¬¨©ª©«­§ª¨©ª ¡£  ¢¢¡  £¥¡¢¡¢¤¡¡¡¤¡¢ ¡ ¥¡¡¢¤ ¡¤ ¢¡¤¤£¥ £¡¢  ¤¡¤¢§¥ ¥¤£¡§ ¢¢¨£¤£¦¤«¢§ ¥¤¢¡¥¡¥¢¦¤¨£¦¥¦¥¥¤§¥¨£§¢¥¥¥¤¦©¢¨¤§£©¦¥¦¦£§§§¡¨¤§¦¥£©¢ª¦¦¤§§¬¥§¡¨¥¬¦¨§¨¥¬¢¥««¥¨¨ª¨«¥«§©ª«¥ª¥ª¥­©¨§­¬«ªª¦¬¨­§¬§¬§¨ª«©¬¤ª«­ª¬­¬¬¬©««¬¨¬¬ª¨®ª­©¬¨¬§«ª®©®§¬«­¬­¬°©®¬°­®¬¬¨­¬¬­¬ª®¬¯«¬¬¯®°ª¯¯°®¯¬±®¯¨°­±²®¬ª¬¨{¤ou][OxUFiMIbQK_MF`QMYUO]MF[QFYUDWQF_b_ixi¬­ulb][`_~Su[MtUSfnWilQfWKf[S`bUifWnxdqwu©¿ÎÕ ªÛ§®â©¶å¯·ì³¼î³¾ò¶Ãô·Ãõ¼Ãù·Æú¹Êú¾ÈúÀÌúÁÏú¿ÏúÃÎúÅÐúÅÓúÆÓúÊÛúÆÖúÉÝúËßúÌÝúÎàúÌÝúËáúÐãúÐäúÒãúÕäúÔäúÓçúÒèúÓçúÔçúÒçúÐåúÌçúÑæúÐçúÐåúÎãúÐâúÏäúÐãúÍâúËâúÊáúÊâúÉáúÊàúÎáúÍæúÍçúÐäúÐãúÖæúÕçúØçúÓèúÐçúÊäúÊãúÅßúÂÝú¾Ùú¾Úú¾Õú·Óú·Ñú·Ìú´ÌùºËú¼Çø·Èó¶Ìõ´Çô³ÇõµÇù±ÆúµÈú·Éú¾Ïú¿ÑúÁÖúÃÓú¾×ú¼ÛúÂØúÁ×ú¿Óú¹ÑúµÒú²Ëö¬Çì¬Æã¡¾Þ ¹Õ¸Ð¯Ð¯Ó¬Ô¬Ø¢®Ü ®Ü®Ü±á¡¶á¥·ë¬»ñ®¾÷µÄú¶Èú¼ÈúÁÒúÃÒúÃÒúÆÚúÊÙúÌÛúÐàúÎâúÎâúÏãúÎäúÏâúÏäúÊãúÌßúÍáúÒãúÏäúÐäúÎâúÑåúÎáúÏàúÍäúÎáúÎãúÍáúÐâúÎâúÈßúÉßúÌÝúËÝúÈÛúÆÛúÃØúÃØúÅÖúÂÕú¿ÖúÁÎú¼Òú»Ïú»Ðú·ËúµÊõ·Éó²Èî³Äì¬Áè¨½å£½à¢ºÝ£´ÖµÔ¬Î©Ê®Æ¥Å¥¿¤» ¶®®§¢|uri~]{r[ufQk]Oo`Mg]Qb]Md`Wg[QfWO_]Q_`S`[OdbS`fSffSglYlu[iguow¡~²¬x[]MoUBkQO_UO[OM_SKYMM[QBYSK[QMUMD_SM[QI]OF]OK]OM]MK]QD]UMYMIYSM_[S`_bn³¸¡²¹¤·¹¤¸º¡º¸¢º½¡¹º¡º¹¢¹»¦»»¥ºµ »·¡»»»»¤»»¢»¹¢¹»£¼¼¨¼½¦º¸¡»½¡º½¦»¼ »»¢¹¾¥¾»§¼»¦»½¥¼»¦¾Á¥¾½¦»»¥¼¼¡½¾§½¾§»¾¦ÀÀ¬½½§»¿¨½¼£»¿¥¼¼¥º¼¨¾¿§º¾§¼¿©º»§»½ ½»¥¼»¥»¼¥»¼¢¹¼¢¾º¤¹¼¤»»¦¹·£¼»¦»º©¹·¥»¸¤»º§»¶¤º¹¡¶¹ ¹»§»·§»º¢¹º¢¹¹¡º¹¢¸»¦¹º¥¹¹¤»»¤¸º£¹¹£¼»¥·¹¡··¤¸º·¹£¹¹¤¹¹¢¹¸¢¶¹£»· ³¹¤·¶ ¹¹ ¶¶¢³¸£·¸ º¸¤¶µ¡º»¡¹¶¤¶¸¡¸´¢µµ¤··¤¹·¤¹·¢¸¶¡¸¹£¶·£¶·¥···¶ ¹¹¡··¥¸¸£·¸¢··¢¹¹£¶¹£¸·¢º·¡·¹¡³·µ´ µ¶¡³·µ³¶¹¡¶µ µ³¶³·¶ ²¶ ¹¶¢³¶¢¹´¶µ¡µµ³µ³µ¢³²µ´¶²´²¡´³´³¢²³³³ ³³¶´ ²³¡³µµ´¡²³³´³² ±³²°¡³³°³´°°²±°²³°´²²³´¯±³³±±±³³³¡²°³²°µ³²¯²°±±°®¯°°®¯­°°³¯³®°³²®®±­±¯®±¬±±±±®®³®­²²±¯®­¬°²¬²­¬°¬¯®¬±¬°|¡    ¡¡¢  ¡¡¡£ ¡¡¡££ ¡£¤  ¡£¢¡¢   ¢¢¢¡£¡ £¢ ¢¡¢¤¡¡§¡¡¡£¦ ¡¥££¥¢£¥¢¢¤¥¤¥¡¥£¥¡£¥¨§¥£¤¦£¤¥©¡¤¥¨¥££§¤§¦§§¦§¨£§¥§©§£¦£§¥§§¥¤¨¦¥©¦¤¨§©¤¦«©§§¥¥©«§©¦§¦§§ª©§§¨¦©ª¨¬©ª«£¨§¨§ª¥¤~rxU]FtO=dF=YI?UK?QF:MK:OI?QD5OF=IM=OYQYng¡x|£x©d¤d£b£d¤l¥Y|xMuSBiYIb`M`bIWWIWUD_YMWbQdg[lro£|·ÅÒ¢Ö¨Ý¥¨ß¨±ä§´ä®¸í¯ºì°¾ó²¾ñ·Áò´Ã÷·Åú»ÆúºÈú»Ëú¾ÊúÃÐúÆÐúÁÏúÁÓúÆØúÆÕúÅØúÅÕúËÜúÆÞúÇÙúÎÜúÍÞúÐáúÎàúÎáúÏåúÒáúÎãúËåúÒäúÏáúÌãúÊãúÊàúÊáúÊßúÈÝúÈàúÊÜúÈßúÆÜúÅÜúÆÜúÈÞúÈÜúÌßúÌÞúÌßúÎâúÏáúÏâúÎãúÐæúÌâúÊàúÄÝúÆÚú¾Ùú»Õú¹Õú·Õú·Òú´Îø¯Ìø°Æù´Çö³Èò²Âó°Êò®Áñ°Âð­¿ó­Äô¯Ãö³Äú³Çú·Èú»Ìú¾Îú½ÐúÀÐú»Ôú¸Òú´Ðú³Îú³Ïú²Êõ¬Èð§Åç£Áå¼Ý³Ò¯Ò­Î¨Ê¢Î¦Ó¨Ð¤Ö«Ù®Û®ß®ã§³í«³ò±¼ù²Âú·Äú·Èú¾Ìú¾ÎúÁÑúÂÔúÄ×úÈÖúÈÙúÈÛúÌÝúÎÞúÊÞúÉÜúÊÝúÊàúÍÜúÊàúÌÞúÍâúÍàúÌâúËÞúÌàúÉÞúÈÝúËÛúÊÝúÉÜúÊÚúÇÜúÃÙúÄ×úÂÓúÁÕúÂÕú¾Õú¾Õú½Ñú»Îú»ÎúºÊú½Ðú·Ìú´Ë÷³Åö´Çó±Çð«Áë§Àè£»å£·Ý¶Ù°Õ®Ò®Ì§Ê¥ÈÁ¾½¸³­©x¡wtgl|bzuWtfOqfIf]I_UB`YD[SIY]FYSDWOBUMI[YISSF[UIYiK[`I_kQgxYbbklx¡~{³¡nzDzSDfI?YK?UM?MI8QI:KD:IDBOF8KK?OI:MB=OI?KI=MI=MIBOM5MI=QI=OK:SK=QI?UYQ`t©²§³°¸´³²·µ²³µµ·´·¹·¡¶¸´¶´·²·¶µµ·¶¸´¸¶·³»³µ··´»·¸µ··ºµ»´¹·¸ ´¸ ´· ·º¢´¸¢µ· ¹»³·µ·¡·¸´·£¹·¡¸·»»¡¶º¡¸¸·¸·µ···¸³µµ¸µ¸¢³·²··· ³µ ¶µ¡³¸´···µº³´²µ³¶´·³±³´µ¸´¶³µ³·²¶µ·³¶±´´¸³´µ·´¶ ²¶±·¡´¶µ´³´´³²´²·´³´µ±µ³²³°°³°²±³°³²±±´°³³³³³³¶±´±² ³µ°³±²²´³°²³²³±³°°±´¯³²³²°±³°²±°²³®±²²°²°°®²±³²µ²±®°®°°²°³¯³­°®±²±±¯°±¯°­®¬²­³°«¯®¬­®¬«®®¬®°­¬­¯®®®®¬¯«¯¬²ª¯¬«¬­­­¬«®­¬®ª¬«¬¬«¬¯°¬ª®­®¬¯­­ª®¬¨¬¬¬©©¬­¬ª«©¬«§¨¬§«ª©ªª­®©©ª¬§«¨¬««©©§¨«¬¤­ª¬¨©©¬§§«©©«§ªª©ª ¡   ¢  ¤¡¢¤  ¢¡¡¤£¢¡¤ ¤ ¡¤ ¢¥ £¢¢¢¤¡¤££¢¤ ¢§¡¡¤¦¡¥ ¤¡¡¢££¦¢¥¢©¢¥©¦¢¡¥¤£¦¤£¤¦¤¦¦ª§¥¡¥¢¨¨¦¡©¢¦¦¨¦§¢¨¦¨¦ª¢©§§ª§¤¨§¤¨£¦ª¥¨§©¥ª¦¨§¥§ª¦¥©§¤¨«§¦¨¤¨¦©©¦¥ª¥©¨¨©¬¤ª¤«§§¦«§®§¬¤¬¬¨¨¤¦¬§«©©¨¬¥©ª®«­¨©­«ª®©¬«¬«®¦®«¬¬±¦­ª®ª¬©±ª®­¯¬®§­©¬ª¯«®®¬ª­­­¨¯¨¯«¯­²ª­««¯²­±¬²§®­®«±¬°±¬®¯¯³¬¯¯¯¬¬©¨¡inW]MrUDiQMdQK[MD`UK[SI]SI]SM]UK[bWduq°ÁÅ¶z·~¸·~§grS~]OqiSkkUnfMbYSf_Skk[inWntdwuz¤¹ÈÒ ¨Ø¡¬Û¨±å¬¶æ­»é®»ì·¾ò³Ãñ¶Æô»Å÷·Åø¼Êú¾Ëú¿ÏúÀÏúÂÎúÃÕúÈÕúÈÖúÆÙúÉÙúÉÝúÎÝúÎâúÌàúÍàúÏäúÐäúÕæúÐèúÕêúØêúÖëúÕéúÖêúÓìúÒèú×éúÒèúÖìúÎèúÎèúÒæúÏæúÌèúÌåúËáúËæúÎàúËâúÎäúÎäúÐåúÐâúÕçúÖæúØéúÖéúÔêúÓçúÍæúÊäúÉàúÈâúÅàú¿Ûú¿ÝúÀÚú½×úµÔú±Ðú³Ìø¶Íö´Èö¶Êõ´Èô³Çô²ÆòµÃö±Æó±È÷·Æú»Íú¿Ðú¾Ôú¿ÓúÀÖúÃÛúºØú¾×ú·Öú·Õú³Ðú¶Ðø³Îö®Êï­Äë Àá¾Ù¸Ò±Ï­Ð¬Ð­Ð¬Ô©Ø¢°Û³Ù²á£°æ¨¶î°¸õ³¿ù»Çú¾ÊúÀÍúÁÐúÁÒúÆÚúÃÜúÇÛúÈÜúÍßúÎÝúÎßúÐâúÎèúÍâúÐãúÐåúÕçúÐäúÒçúÖäúÒçúÒçúÑæúÒãúÐæúÑäúÑàúÐäúÒàúËãúÌàúÅàúÈáúÆÝúÅÝúÅØúÄÛúÃÕúÃØúÃÕú¿ÓúÂÓú¿Óú½Îú»ÏúºË÷µÊó¶Èò¯Æï°Åì«Àçªºâ¢¼à¡·×µÒ°Ñ¯Ð¬É¦Å¦Á£À¡¾ ¶®¬¤¢xqti|`|o]ukWqdSn`Sf`Uf]QibOf`ObYObYQbWSb_UdbMftUit[fx`obri{u¥¹ªxQ_MlUFdUK`MK[OD]QD]ODUQK_ODYQM]SK]SFWOI]QI]OK[OM]OK[OD[QKUSD[QD`SK__[i{¬· ¬´³»¶·¥º» »·¤»¼£·»¢»¼¤¼»¥½º »»¢¼» »»£¼»¥º¼¢»º¢»º¤»»¡¹»¥¼¼£¹¼¥»¼¢¼·»¾¦¼½¨½»©»»£¼¼§¾¹¤»¾¤¼»§¾¼¥»½¥»À¦¾»¤¼»¦¾¼¥º¿£»¾§¼»£»½¥»½ª¿»¥º¼¨·»£¾¼¤»º¤¹»¢¼»¦¾º¥¹¸¡»»¦»¹£·¼¢·¸£·¼§½¹¢º·¢»»¦»¹¢º·¥»»¤¶º¢·º¤»»¥»» ·¸£¹»¢¹»¥½¸¡¸¸¤¶»£¸¸¼¹¹º¢·»¡»¸¥»·¥¹³¡½¹£¸º¦ºº»¸ ¸¹¢·º¥¸¶¢··¢··¢¸¹¡·· ·¹¡·¶»··¹¢¶³¸¹¤··£¶³¹¶¸· ·¹¡¹´ µº ·º¶µ¢·»¡µ· ·¹µ¹¡¸µ¶³´º¢¶µ¢³¶ ·³ ··¡·³¡µ¶¤··¸¶¹·¶· µ³µ·¢¸¸¡¶¹ µ·¡º¹´´ µ´µ¸ µµ ¶µ¡¶¶·´³³¶µ¡´²³³´³ ³³¢µ²³³µ¶µ³³³´µ³°µ³µ³³³¶µ³³´¯´³°³¯±³²²³²³³³´®±³°³µ® ±±³²³°±¯³¯±°¯³±®°®²±¯¯³®´­¬¬®«¯°®­¯²°¯°®®®®­¯±¯¬±²­®¬°±°¯¯°®®­³²­¬®­­³±®­®®|~|~ ¢  ¡¢¡  £¡¡¤£ £¡ ¡¡ ¡¡ ¡¢££¡£ ¢¦§ ¤¡¡¢¡¢£ £ ¥£¡£ £ ¢£¢¥¡£¡¡¡£¡¥¤¥¥¢¨ £¤¢§¢¡¦¡¦¤§¦¦¥¤¥£¤£¢£¤¦¥¤£¨¦§§§¢£¤§§¦¤¨§¥¢¤¨¨¤§§§¥©¦«¬¤¥©¨¦ªª§«¤ª©§¥§§¬©§¥§©§¥¬§©¨«­§©ª©«¦§§©§ª¢£zdoUUDnM8`M?WO:UI8YK:OO:UK:SI5MM?SUMUqk»ÎÌÃ¾{ÃÃtY_F{YIdnQdnK_S?`UDUbD_[M_gS`nUior ·ÁËÓ§Öªàªâ§´å¬µé«ºî¯ºì±Áð±½òµÂõµÃúµÄú·Çú¹Éú½ËúÀÐúÀÎúÁÓúÂÕúÅÕúÈ×úÅ×úÈÛúÆÜúÈÜúÊÝúÌÝúÒâúÐâúÏãúÏäúÕæúÐäúÑãúÒæúÒèú×äúÓåúÒçúÑèúÎäúÊåúÆäúÇâúÆßúÃÞúÈÝúÈàúÆÜúÈÝúÆáúÈßúÌáúÎâúÒãúÐâúÐåúÈäúÉáúÆãúÇàúÆÝúÁàú¿Üú½Ùú¼Ôú¼Óú´Ñú³Ðù©Êõ®Æõ³Ãô­Áò­Áð­ÁîªÁï¬¾ð¬Áï©¿ñ¬Áö±Ãú¶Åú·Êú»Ëú¾Òú¸Òú¼Óú¸Õú¶ÕúµÑú°Ðú²Ïú°Ì÷®Èó©Çí¨Ãé¤¾Ý¹Ö²Ð­Ë«Ê¦É¡Ì¦Ñ£Ò£Ö¨Ø¬Ù¬ß®ç¥³î­»ö³¾ú´Äú¹Ëú¹Ëú¾ÏúÁÒúÁÓú¾ÕúÃÕúÁØúÅÚúÈÝúÊÙúÈÝúÊÝúÑßúËÝúÊßúÌàúÒáúÑâúÏâúÌàúÏáúÎáúÌâúÊßúÉàúËàúÊàúÆÜúÆÝúÂÝúÄÚúÀÕúÃÖúÀÕú¾ØúÁÓúÁÑú½Ðú¼Îú»Ïú¸Íú»ÊùµÍ÷³Èö²Åñ¬Ãì­¾ë§¾æ£½â¢ºàµ×³Ö¬Ñ©Ê§Ä£Ä£¾¼··¯©z¦utrk~f|`wz[wiOq`Id_DfYB[[KYYI]WI_]?YYI[SF[WD[UKY`I_gQWnS`w_dYn[ogx~x¯¡knMxQ:_I:YI8UF?OI?OI=UI=QI?KD5QI=MI:OI5OF8KIBOI8QM=OKBQF?OK8QF:OD?MM=UUQ]zo£±£³¬´³·°¸³¶±´¶¶µ··¸¸··µ·¹µ·³¸··¸·¡µ···²¸····¶¹·¹·¸¸¹´º¢¶··»µ¹µ»¢¸µ·· ¸·¶¶·¹³¶´¶¸·³¸ µ·²µ ±¹µµ¸· µ¸³·³¸¢µ¶·¶¸·´µ³µ´µµ¹¡´µ³µ³µ³¸³´µ³´·µµ°·¶µ³µ³·£³³µµ²µ³¶±¶³µ²µ´³´³±µ³µµ³´¶¯³³´°·³·²²²³²´²±²³³²³´²²±°²³±´³³±´²±²µ²¶°°¯´°µ²²°³®°²·¯³°²³²°³°³²±¯±°³³³®´®³°±°³¯²±±°²®²°¯¯³²³¯²°±®²®³°²°³®¯¬®®¬¬¯­¬®°®¯¬¯®³¬®°°°®«°¬°¬®ª®­¬¬²«®¬­®°©­«¬ª®­¬¬¬°°°±©¬­­¨²§«­ª¬°¬¬¬¬¬®ª¬«¬ª¬§¬®«««ª­««¬­¨«©¬¬«§¬«¬¬¬§««««§©«««©¬¨«§ª§§¬®§ª§®«¦§«©¨¨¬¦¨©«ª¡ ¢ £¡¥¡¡¡¦¢¡¡¢ ¡¢ ¤¢¢¢¤¡¥ ¢¢ ¥ ¤£¢ £ ¥¥¡¤¡££ ¢¨¡¦£¥£¤ ¥¡¥£¤ ¤§¢ ¦ ¦ ¢¡¥ ¥¥£¤¤«¢¤¥©¥¨£¤¬¦£§¤¥£¤¡¦¡¦§¨¦¨¤§¤¦¢¨¥¦¦¥¡©§ª¥¨§¦¤©¢ª¨«¦ª¦§¦¬¦©¤ª§ª§®§¬ª¨¥©¦ª©©¨¨¢¬¬ª¤«§¬§©¢«¨­¦ª¦¬ª«©ª¬¨¨¬¨ªª¯¨¨©¬¬®¨¬¨¬¥©¬¬«¯¬¨¬®¨«ª®¨«©¯©°ª®®¯ª¬¬±©¬©¬ª¬«±­¯¬¬®¯¬±¬®®­¬²¬¬«­ª®¯¯¬±®³®¬¬­¯±¬°¬¯¬±®« ¨x_fS~YDqSIiQF_Q?_UK]WB[SM`SD]SK__Ub|xÆØ¡ ×ªÐ¦Æ¢Å£Âzd]S{fUow[liQl`Kn_SifWliUon]qt`qr| ¶ÃÎ£Õ¬Ù§³à§µä«¶è¬ºí°¹ï¶Áð³ÃôµÅö·Åú¹Çú¼Èú½Ìú¾ÎúÀÐúÂÓúÆÕúÆÙúÈÛúÆÙúÌÜúËÞúÎàúËâúÍäúÐæúÒäúÒèúÕçúÒçúÖéúÔéúÔëúÖìúÜíúÙìúÜëúÙïúØïúÖïúÒíúÐëúÑéúÊçúÍèúÉçúÎãúËæúÐçúÐåúÌçúÎçúÕçúÓéúÓéúÒéúÏèúÍèúÏèúÌäúÌãúÌãúÉãúÇâúÅÙúÆÛú¿Øú»Õú³Òú´Îù³Ïø³Çõ­Èò±Èô°Åñ®Ãó¬Ãõ±Ãö°È÷³Èù·Ëú»Ëú»ÎúÀÓú¼ÖúÁÛúÆÛúÆÜú»Üú½Üú¼Õú·Õú¸Ïú¶Ðø¯ËðªÅï§Ââ ¾Ý¸Ó²Î±Ë©Ì¥Í«Î©×¨Ö¬Ü®Ý±á¡µéª¹ñ³¼õ·Ãú»Ìú½ÎúÀÐúÃÕúÇ×úÆÙúÇÚúÈÜúÈàúÊáúÊáúÌâúÎäúÒæúÒæúÎçúÏçúÓæúÒçúÕæúÖêúÕèúÔçúÒçúÑèúÑèúÐçúÐçúÎæúÏäúÊãúÈâúÆÝúÇßúÅÚúÀÚúÂØúÃÙúÃØúÁÕúÁÕú¾Óú¾Óú¾Ñú¹ÐúºÎù´Éô±Êð±Ãï®Æê¨Áã©»à »Ú¡¶Ö´Ô³Ð®Ì«È¦Ã¦Á£¿¹²®ª~zxwii|`~lUukQldUldSgbWfbSi[QiiSdfYbbOg`QfdSfiQik]it_kflg|i|r£± lnO~UKkUDdQDfMFUQD_S?_KI_SMYM=[OFYSK[OIWUF[MIWKI]SI[QF[QF]QF]OF]SMbWF[]Sgw{t£³©·£³¹¡·º¥µº ¹º¤¼¹ ¹¹¤·¹ ¾»§»»··£»º¢»»¤»½¤¼º¤»¼§º»¢¾¹¡»¼¤¸¼¡º½£»º£»º£¼½¥¼¾§º¼¤½»¥»»¡¾¿§¾¸¦»»§»¾¤º¸£¿»§¹¼ ¸º¤¼½£»¾¦¾½¤»À¦¼¼©¹¼§¾»£½¼¢»»¥¼¸¢¼»£¸¼¤»º¤»º¡¹º¢¼»¡»½¥¹»¤¾»¡¸¹¤¹»¦»¹¡¼¹¥º»£¼¼¼º¤¹½¥º¼ ½·¡»º¥¸¸½¹¹¹¥·¹¡·¹¤¶¹¤¹º£»¶·¹»· ¹º¢º» ¹·º¹ »¹¢·µ¸µ»¶ ¹´¢¶·µ· »¸¶¹¢»·¹¹¢µ¹¢·¹¶¹¢¹·£¸¹¡º··µ¡·¸¸µ¦³·¡»¹¢¸·¢µ·¥¶·¡¹· ··¢¶·º¶ ¸¸£¶µ´¶·· ¶³·´¶º¶·µ´´·¡³·¶´´¸ ´µ ´·²··¶ ·³³´ ³¶µ¶·´¡³¶ ¶´¡¹µ¶·´·´³·³ ²³·³µ´ °³µ°³³³²·³µ³°¶´³´´³²²³´´³³±³³±±·¡²³µ³³³µ³±³³³°³³¯°³±³²³³´´±²°²³¯¬°²±±°°¯²²­¯°°°³°²±°­³²®®±­±¬®®¯¯±¯°°°®±±°¯®¬°±±¯¬±®«°²¬°®­¯z~|||~£  ¡¡ ¢¡£ ¢ ¡¡¡¤¢£¡£¡ ¡¢¢££¦ ¡¡¡¢¡¡¢¡£ ¢¡££¢¡§¡ £¤££¡£¡¤¡£¥¤¤£¡¢ £¡¤£ ¤¦  ¦¡¤¦¥¥¥¤©¥£§¦¢££§§¥£¦¤¦£££§§¦¥£¦¦¤¨§§¤§§©¥¥§©¥¥¦¦¤§¦§§¨ª£¥©¦¨¤§¦©©§ª«§ª¨¨¥¨¦¬§«©§§ª§§«¬¨«©§¬¬¥¨©££¥{fkO|SDlI=[M?QI?SI:QO?OI:SD8QO?OSIYuqnÄÙÙ¨Ò¨ÏË·nQYFr`Og{OdfKbUM__M]dOffQ]gQgiUglt|{³¾ÈÏ¢Ö §Ø¢®à¤­â¥´ä«·è¬¸í¬ºï²»ò²¾ô³Á÷µÆùºÃú»Çú»ÊúÀÍú¿ÓúÁÐúÃÔúÆØúÅØúÄÙúÈÙúÈÞúÇÝúÌÝúÎßúÓáúÒãúÏæúÐæúÒæúÒæúÖæúÙæúÛçúÙéúØéúÖìúÐèúÐèúÏåúËåúËáúÊãúÊâúÊàúÊáúÇáúÊâúÌâúÏâúÎãúÌâúÌãúÇàúÌãúÊáúÈãúÇãúËàúÈßúÈÞúÄÛú¾ØúºÖú¹Óú±Îú³Êø¯Êö®Çô±Ãò¬Áî«Àì§½ì«½ð«Áï®¾ò®Áõ®Äú²ÅúºÆú·Îú¾Òú¾ÓúÁÓú¿×úÃØú¾Ùú¹Ôú·Óú¶Óú³Îú¬ÊôªÆð¥Ãé¦¾á¸ÙµÑ­Î§Æ¥Å Ê¢Ë Ì¡Ð¥Ö©Ü«à ¬ã¥³í«¶ô²½ú¸ÃúºÉú¸ÊúÁÐú¾ÓúÀÒúÀÓúÃØúÆÙúÇÜúÈÝúÊàúÊÝúÍÞúÍàúÌßúÍáúÎàúÒÞúÒãúÓãúÓãúÐãúÓãúÏâúÎàúÌàúÎÝúÍàúÉÝúÈÝúÃÛúÁÚú¼Øú½Õú¾ÔúÀÔú»ÒúºÒú»Ðú»ÌúµÎú»Îú¸ÌøµÌ÷µÈõ²Èô°Äî­Ãë§¾è¦¹á·Ù²Ô°Ñ°Î«Æ¢Ä¤Á ¾¹µ²¯|§{¥wqrnd|bx{YukQndKfdKbUK`WI]]F]YF][K[_I][I[UI[[KWdM]dK`nW`~`iYnYnktuw£x`dFoM8`K?UM=SIBOM=MM?UF:MMBOKBOD8QK=KI=QI8QI=QK=OD=OI:KIDQM5QI=OI=QI8UQFWqtg­ ³«·±´³·±³µ·´·µµµ·µ·¶¹µ´³·¹¶³¸··´·µ¸¶µµ·´¸¡µ»µ¸¶¸¡·¹µ·¸º¡µ» µ¸¡¶»¡º¶¶¸··µ¸¶º¡µ··º¶º·º¶¸´·µ»¶·³¸·¹³¹·¹¢³¸··µº¶¹µ´¡¶µ··µ¶¶²³· ³¹´·µ¸¶·³¸¶´²¶¶µ´·³µ³´³²··´µ±µ±µ±´³³µ´¯µ²·µ·®²³±³µ°µ¯µ°²³¶³²²²°´²´µ´²³¬±±±°µ²´³±±µ²²®·±°²³²³³µ±µ®²²³¯³¯¯®³²µ¯¯®²±´±±²°±±°´³²®³®±­²¯±®´±²°³°¯¯®°¶±±²µ¯²®°°±°®­²®®¯²¯±¬°®®®³¬®¬¯¬±®®¬¬°°¬«¬±­¬ª®­¬«®¬¬¬¬­­©¯­­®­¬®¬­¯°¨¬«¬ª­¬®«­®¬«¯©««®¨®¬¬©­©ª¬®ª¬­¬¬«©ª®¬¨¬ª§©¬¨«©«¦«§¨¦¬¬©¬«©©¦©¦«¨©©¬¨ª§©¥­©ª©¬ª¢      ¥ ¡¢ ¡ ¡¡¡  ¡¢£¤££¦ ¢  ¢¢¤¡¤¢¢¡¤¡¡ ¤¤ ¢  ¤¢¢£¥¢¤¦¡¥¥¤¦ ¦§¡£¢¤¡©¥¡¤¥£§¤¨¥¤¤¤§¤§¤¨¡¦¦¨¦©¥¨¤¤¤« ¨¡§¢©¢¤¤¨¢¥£§¦¦¡¨£§¥¦¦ª§¬¨¥£«¨«¤§¦© ©ª«§©§«¦©©¥¡¬¨¥¤¨¤ª¦§¥¤§¬©¬ª«¨¥©¨¦¬¦«¤¬¨¬ªª¬­¨ª¨©¨¯¨¬ª­©¬ªª«­ª­¬¬¨®¥¬ª¬«¬ª¬ª¬¬¬¥¯­¬«¬¬¬¬­«¬¬°§¬«®ª®¬°®®¨­¬±¯°¬­«­«¯®­¬®­¯«±°¯¬­¬¯¯¯®³®¯¬¬¬¬«­¥¦qu]gQ|SFlSDdQ?_UI`YM]OB`QDWUK[[I`twuÇà£¤å±Ö±ß¬Ö©¶t¢~W]MzwWt]lnOu_OqgWgrWofUnrSrubqq{¶ÀÊ¢Ò¬Õ¢±Û¨¯à§¶âª»ç­¼ï³¾ï±¾ï¶Ãö¶Ã÷¶Ç÷¼Èú»Êú¼ÐúÁÐúÂÐúÄÖúÆÙúÄØúÈÚúÊÝúÌßúÊßúÍãúËãúÍâúÒçúÔæúÕèúÖîúØëúÕéúØîúßíúÜïúÝíúÜñúÜïúÙðúÕïúÐîúÕìúÕëúÒéúÏìúÒéúÐêúÍçúÏçúÐèúÒèúÒèúËéúÎåúÌèúÐçúÌèúÍêúÎêúÉæúÏçúÉäúÌãúÆàúÀàú»ÜúºØú¶ÓúµÑú·Ïø·Ìõ³Èó¬Äñ¬Äï¬¿ï­Âò­Ãõ±Æø³Êø®ÉúµÌú¹Íú¼ÑúÁÖúÂÕúÅÙúÇßúÆÞúÆàúÁßú¾Ûú·×ú´Óú²Îú­Ñô¬Éï¥ÂêÀÞ»×µÑ²Î¬È¨É¥Í¤Ì¨Ó­Ö®Ý£¯ã¤³é¦¼ï¬¾ô·ÁúºÈú¾Ìú¾ÐúÄÕúÅÕúÆÙúÅÜúÃÞúÊÝúÐàúÊäúËäúÏãúÐåúÎâúËäúÎçúÏçúÖæúÐäúÓæúÕçúÒçúÕéúÒåúÒéúÑæúÑæúÎåúÌâúÌäúÇàúÃßúÃÛúÀÜú½ÝúÃÕú¾Øú½Öú¾Õú¼Òú½Ðú¾Õú»Ðú¼Îø´Ìõ·Êö±Èô³Æï¯Èéª¿å¤½Þ »Úµ×·Ñ¯Ì­È«Æ¤Á À¢»³³ª¥|w{rnid~tSwfUulSk`SkdSgfMi`Qf`UilWfkQi`SfiUgiUkoUku[k_t[z`{lx¡w {dnMxO?gWK`WFfOK_[K]QIfOK_MF]SB[S=_QDYMBYQI[QI]SI[SB[SF[QB]QI]SF]SM]UB`[Ufqoo¯¥¸£°¹³¹¢¹¶¡¹¼·º»¹¥¹»¤»¸¡º»¢·¸¡»¼ ¹¼¤»¹ ¹»¡¹¾¤»¾¥»¹»½¡»½¢»½£½¼¥¼¼¤»»¥½½ ¾»¤ºº¥»¾¥»¾¡¾»¦»½¥»¿ »½§ºº¡»½¤»»¢»¹¤½»§¼¿¤¼¼£»½¥»¼£¹¼¡»¾¢¼¼§¼¾¤»º¥¼»¡»º »»¦¹·¡¹¼¦¾¸¤½½¥·½¤»»¢¾½£·»¡º¼ ¸¼ »»¢¾¹ »»¡¼»¤¸º¢ºº º¼ ¹»¡»¼¦¹¼ ºº »µº¼¢¸·º¸ºº¤¹¹¤¹¹ ¹¹ º¼¤»½ ¹·¢·»µ¸¹¹£º¶¢···¸º·³·¹»·´¹¼ ¹¸¡¹·¡¶¹ ¸·¸· ¹¹´»¢·º¤···¶¡¹·¢··¶´¹·¡³²¸·¶´··¡·³·º·¸´µ¹¹¸¸¶´·´¡¶¸·¶¡´··µ´¶ º·³· ¶´³µ·µ¥·¶··´µ ´±·³µ¶¡³µ¶µ µ³³µ²´³¶²³ ´²³³µ³´³´´¡´± ±µ´³´²¯±µ´³³³³²±³³³±¯¯°³±²²µ³²²±µµ³±³²µ¯³°³³¯²´®¯°³°¯³²³±±¯¯³°¬¯­²³­®¯­¬¯¯¬±¯¬°®¯«°°³¬¬¬®°¯°²¬­´¬¬¯³¬¬¯°±¯¬±¯|z~|~|~¡¡   £ ¢ ¡¡¡¡ ¡ £¢ ¡£   ¢¢¥  ¢££¢¢£¢£¢£ ¢¤¡£¡¡¡¡£¢¥¤¡£¡¡¢¢¢¦¢¡¢¤¦¢¥¡£¤¤£¤¢¢¦¦¤¥§§¨¤¨¥¦¤©¦¥§§§§¥ª¥¤££¦¥§¦©¥ª¨¦¥©¤©§ª©§§§ª©©§©¨¥¥©¨¥£©§¦§¥«¥¥«§©¬«§©¨¦«©ªª©©§«¨ª«©©§©¨¨«©§§¦¨¢£t|`fKwO=iK8_K=QK?UQ=SI8OM=SK8QQBUiib»Þ¢ßªÕ®Ù¦Ë¡¬`nI_OnwWoxUidIiYDd`S]nS`iOfgOlq]d~drwz±ºÆÎ Ò¥Ø¬Þ¡«à¥²ã«³éª¸èª¸í®¾ï­¼ó¶¾õ´Æö¸Æú¹Çú»Ëú½ÎúÀÌúÁÒúÀÓúÄÕúÄÙúÊØúÆÚúÊÝúÊáúÌßúÏàúÒâúÎåúÐãúÐåúÑéúÖèúÖéúÚëúØëúÙíúØëúÓéúÔéúÐçúÏèúÎçúÊæúÎäúÐåúËâúÑãúÌäúÇäúÌáúÐäúÇãúËäúÊâúÈãúÊãúÊãúÇãúÆãúÉßúÃàúÁßúÀØúÁÚú»ÕúµÓú°Îú±Î÷²Çõ«Æò¦Áñ§Àè£¾ç¤¼ê¦ºð¬½ð«ÂòªÂ÷¨Âú®Çú³Çú¸Êú»Ñú¿ÔúÃÕú¾ØúÈÛúÅÚúÀÛú»ØúµÔú²Òú¬Ëö§Æò¥ÆìÁä»Þ·Ô±Î©Ç¥ÂÃÇÈ ÎÓ§Õ©Û¬ä£®ë§·ò®º÷·Âú¸Çú»Ìú¼Îú¾Óú¾ÕúÁÖúÀÝúÈÛúËÜúÐÜúÊâúÇàúÌßúÊãúÍßúÊÝúËàúÍàúÏàúÎàúÌßúÒßúÏâúÐáúËÞúÍßúÉÞúÉßúÇÜúÄØúÁÛú¾Ùú»Ôú¾Òú¸Òú¸Òú·Ïú»Ðú¶Ìú»Ìú»Îú¹Îú³ËúµÆö±Èô²Äò±Áì«Áê©¾å¦ºà¸Ù²×¬Ò¯Î§È¤Ã¡¿»¶µ°ª~¡wttil{k_zwWqkQndIk_Fb`IYYDd[D[]M_YIYbOYfK[dD``Q[lU`kK`lQbwWbQl|Ukkntul~Y|YDgS?]MDYODUK?QF=UF:UI8QF5IK?OD:QI8QK?KK8SK:OI8MK=QI:SF?KF?OI=QK=QO?OWI[kdi~«³¥¶®µ³µ³·°´²¸´µ³·µµ³ºµ¸·µµ·µ··µ´¸µ»µ·¶¸´····¸¡¶¸·¶·¶³·¢µ»···»·¶´¶¡·¸ ´·µ¶·»¹··¸¶º´º·¸¸º³»µµµ·´¸µ·¶·³·¶·µ´ ³·³·µ¶··µ´¶·´»¶·´¸¢´·³¶³·²µ³µ³µ´¸³·¶²³´´·³´´µ²·³¶µ´³·°¶¶´´µ´³µµ°³²µ²³³¸´³³²´´¯²±¶³´³µ³³´µ²´³°°µ±±±±³²°²°µ³°®´°µ²¯²µ±­³³³´¯²°³°²°®±±²³®±±¯¬³®³°³²°±°¯²³±­±¯°®³°³´²±´¯²«±°±±®¯¯®±²²¯­®¬®²°®®­«¬¬°­®®­­¬®­¬®¬±¬®¬®¬®°¯¬¬¬­¬¬«®¬®¬®­«¬¯¬¬¬¯­°©­¬««¬ª¬®«©ª©«®¬ª«¬®¬«©¬©¬©ª§ª¬­©©©©§©«ªª«¨¨§©©©©©©«ª§©©¦«¦«ª««©¦ª¨«§©§  ¤¢¡¡ ¢¡  ¢  ¡¢¡£ ¤¢£ ¡ ¢ ¤  ¢¤¡¡£§ ¢¢§¡ £££¤ ¡£ ¥¤¤¢©§¦¤¢¤ ¤¤¡¡§¥¨£§¡£ §¥¥¦¥£ª ¤§¡ ¨£¨¨¢¤¨¤¤¢¥¥£¥©¡§§¤¤¨§¥£¨§ª§¤¥§¥¨¢¨¦¨¤©¥¨¨©¢¬¨¬§©¥«¤©£ª¤¬¥ª¦§§¨¦©©§¦¨§©¦¬§¬¦«§©¦ª£¬ª¬§§§­¬«§¨¦®¥¨­¬ª«©¬¨¬¬¬®ª¨¯§¯¥®«ª¬¬§¬¬°¬¯§¯¯­¨¬®°¬¬ª¬©®¬®¬¯¬¬¬­¬¬¬®ª®¬¬¬®ª®¬¬©°¬­°¯¬¯©¯®¯­®®±®­¬¯­®¬²¬¯­³¬¯ª¬£¤lnQYFrUFgUI`ODd]F]QI_SFdUD]WMbilk»ä«ì¦³Ý¸Ø¯Â§dqOq`x`z~WwfUtdQokWtnbntUor]t[ui~~µ¿È£Î¥Ó °Ø ±Þ£µã¨·é¬ºë­»ë¯¿ï´Áô³Ãô·Ã÷¶Èú½Êú¼ÌúºÎú¾ÎúÃÓúÃÖúÅÙúÊÜúÈÞúÌßúÎáúÍáúÉãúÒæúÔçúÒéúÕèúÒêúÔëú×êúØìúÝîúÛïúÜñúÛñúÛòúÕðúÖïúÖíúÔêúÓîúÎêúÒèúÎëúÐêúÒëúÑéúÏëúÐêúÒëúÌìúÒéúÐêúÏíúÎëúÐëúËêúËéúÊæúÌçúÉæúÆáúÄÞúÁàú½ÚúµÖú¶Ïú·Ëö³Èó¨Æï©Ãì¥Âî¦Àñ¬Áó¬Ãô°É÷®Åú¯Êú°Êú¹Íú¼ÐúÁÓúÄÛúÆÜúÈàúÈßúÆàúÂâúÀàú½Úú¸ÚúµÕú°Ò÷©Êî§Åè¢Àä ¾Û¸Ð³Ë¬Ç¬Å¥Ç¤É¨Ó©Ò§×°Þ¤±æª´ï¬ºó²¿ú»Èú¼Ðú¾ÒúÄÒúÃØúÆÛúÃÛúÅßúÈÝúÌàúÒàúËæúÎåúÏåúËæúÐæúÒáúÎçúÏæúÒäúÎäúÓãúÐçúÒãúÐäúÒåúÎãúÊäúÊäúÌãúÆàúÆÜúÀÝú¾Þú¾Úú»Øú¶Öú¹Õú½Òú»Ôú»Ðú½Îú¾Òú»Ïú·Ðù¹Ì÷¶Èô¶Èñ¬Æí°Åêª¾ä¡¾Ü¡¶Û¶Ò³Ð¬É©È©Á£À¢·¶°«§¥~wrorg|]u[urQriSidQo`Kk`UddYfdSiiWik[kiSkkWkq_nx[nrWiw]lYt]onwz|n[~]KiUKdQKfSI_QD]S?[SD_S?bQF]U?WSI]QIbSKWSDbQB]OI[MF]QB_OMYUD]SDbSK]UF`WSbnko­·®¹³º¹ºº¸¹¹ »»¤»¹ »»»º¹º¤»»½¹¤»¼¥¾»»¾¢¼¼¢º¾£º¹ ¼¾§»¿¡»¾¤¾¿¦º¾¤¾¼£¼»´»¥½¾¥»¼¤»½§½¼£»¾¥¼»£½¼£¼½¡»»¥½»¢¼º£»¼¢¹¼¦¾½¥º¾ »»¥½¾¡¼»¢¸¼¥¹ºº»£»»¤½¹¹»£»»¡»»¢¾¹ »º§¼»¦»»¥»»¤»º¡¾º ¹½¤»»£¼»£½»¡¸º¡¹·¢»»¥¹½¡»»¤»¹¶· º»£º¹¡·¸¹·¡¶¼¡»»£»»»·¥¹º¢·¹¡¸º¢¶¸¢¹¹¡º»¢»»¡¹·¢¹¹·»¢º¸ ··¢¹¹¢·º¤¹µ ¹¸³¹ ¶··¹£³¶¶··¹¢·µ¶³¶´¡·· ³¶¡¸µ·¹ ·³ ¶· µ¶¶¶¡¸·¶¶ µ´¶· ·º¶µ¶°µ·£µ¶ ·³¢¶´¶·µ¶¸µ·³¶¶¶¸ ³¶¶²µ±·¶µ·¶³µ³³³·³´²³¶¶³µ³±³³µ´²´³³³²±°³´²³³³²³³µ±¯³³³³²¯²¶®±µµ­°±´°¯³²²³¯¯²±³³±³³±°³®±°°¯³¯¯±²­±®±°±°®®²¬¯²¬­³¯°®°¬°­®¬®¬±¯¯°¬®¬¬¬®¬­¬­¯¯®°¬«­¬¬°¯~~~~~~~¡ £¡ ¢ ¡¡ ¢¡ ¢¡ ¡¢£££¡ ¡ ¡ ¤¢¢¡¢¢¡¢¡£££¡¢¤¢¡¥¤§¢¡¢£¢£¢¢ ¥ ¡¦¥¡¥¥£¥¡¥¡¡¡¡£¥£¥¢¦§§£§§§§¢£¤£¤¥§§££¤¦¢¥¥§§¦©¢§©§¦¥¤§¤¦¨§¥©¢§¦§¦¨§§©§¦©§©¥§£§©¦¨©©¨¥ª¦©§§¥­©¥©§¨«§«¨¨ª§§«£¨«¬©¨¨§¨ª¥§ª§|¢dkKU?oI5bI:SQ?WM:YK8SK8SD5QO=U][d¡ß¨î¨®é³ÒªÌuYgQ~btbxwQwfIn`QfgQkfOgkSkrOiqSnltqw«·ÁÎ¢Ð§Ó©Ú¬Û¤°â§³å£·è«»ë«»î®¾ñ­¾ö³Áö´ÆúµÈú·Êú·Ìú½Ëú¿Òú¿ÓúÄÓúÆÖúÆÝúÆÜúÇÝúÊàúËÞúÍáúÑáúÍâúÌãúÐãúÏæúÓéúÖêúÓëúÙêúÖêúÏêúÐêúÒéúÎêúÌçúÌçúÌäúÉäúÊãúÊæúÊäúÈæúÊåúÇæúÌäúÐçúÊæúÎæúÐäúÏäúÌäúÌæúÈäúÊäúÊßúÄáúÀßúÂÝú¹Öú¹Õú²Îú±Ðö­Èó©Äî¥¾ë¢Àé½ç½ì¦¾ï¬Àñ«Áò§Á÷­Çú±Èú´ÊúºËú¼Óú¾ØúÁÙúÀÙúÃÝúÂØú¿Ûú»Ùú·Øú¸Óú°Îú®Ìó¦Æì£Áç¼á·Ö±Ð«Ê¥Ã¨ÁÄÆ¢Ë¡Ð¥Ñ¤Öªã¢®ê¨¹ò¯¹÷³ÁúºÇú¾ÐúÁÓúÁÓú¾ÕúÂÙú½ÚúÄØúÁÙúËßúÊáúÈÝúÊâúÌßúËßúÌàúÈáúÊáúÌÞúÊàúËáúÌàúËÜúÆßúÈÝúÌÜúÇàúÆÝúÂÚúÄßúÁÖú¾Øú¼Úú½Öú¹Òú®Ðú²Ðú·Ìú·Ìú·ÊúµÌú·ÌøµÊùµÉö·Éò­Åï¬Ãï­Áç§»ä¤ºÞ·Ù´Ð®Ò°Ë¨Ç§Æ¡½¢º ´®­|©|¢xorkng{~Y~wQugOnfMk`Fd]I`bD][D`]K]gK_bMgbM_lS`iMflSgoQikIgkIgqQgwWkfnkrdwqFqSD_F3[D8OFDKK=SD:QD:QM:KI=UI8MI?UD3KD5UK:QD=SO8QI?QF8SO?QK8MK8SF?QKBWMD]nbiª²¥´±±³²³³´·¶³µ·´´³··¸ ·¶´¶·¹µµµ·´µ¶»²»·»´¹´··¶ ¹º ´¹·µ¸··¸µ¶¶»£´¸¹··¼¢¸»·º·¸¢µº·¸¸·¶ºµ·»··¹¢³···µ¸´····¶¸»¶ºµ´²º¶··»´¸³¸²´¶¹ ²··¸³¸µµ³µµ¶¶·²¶´··´´°´·³¶¶³µ·²·³´²¹²µ²³³¶³µ²³³¶³³±³²³³µ³³µ²³´´²µµ²³²³´´³·²²²´³³¯µ°²²³°µ°¯®³²®²³±´±°±³±³°²±²°²²³®²­³´³¬°°²²±°²¯´¯´¯±¬²²³¯²¯²³´®±±®­µ­®°°¯­°­ª®¯®®°­­°¯¯°®°°®¯­­¬®¬­ª¬®¬¬¬¬­³°­­¯¬¯­­­¯­­¬­®®­°¯©®®«­«¯¬¬«®¬®¬«©¬¬­¨«ª¬«©©©­¬©¯ª©¬«©¬¬©««§««©¨¬§§«§«©«®¦©ª«««¨ª¨©ª««ª¨«ª«¨«©ª¬­«£  ¢£¡¢¡ ¡¢¢ ¤¢£ ¢¡¢   ¤¡¡¤¢¢¤ £ ¡£¡¢¢¡¡ ¢¡  ¢¡¨§¢¦¡¥¢¢¤£ ¦¡¥¤§£¥£§£¦¡¥¡¥¦§©¥¤¤¤§£§¤¦¡§¢§¤¨£ª¥¤¤¦£«¢§¦§¤¨¤§¨§«¤¨¥§¥ª¨§¦¨£©¤¦¤©§ª£¬¥©¦§§¬¥¦¦ª¨§§¤©¬¥¬¦¥¥§©¬©©¦ª§¬¦¬«§¦¬¥®©©¦®¨ª«©©­¨¬¬­¨¬©ª««¨¬§ª©±¬ª«¬¨¬¬¬©¬¨¬®¬©¬¨®¬­©°«¬ª©¬¯¬¬«¯ª®©±ª««­«®«®¬¬©®¨¯¯­¬®¯®¬®¨¬¬®¯­¬¯®°¬­°´ª¯¬¯®¯±²¯¯¤ªr z_bQ{YDrWIb[I`U?_QFbQF_OI_Y?]]WgÜ¬óµ³ö¥¾ã¶Õ¨`{d¤z»wbqYxl[or[xn[o{Wt{`w{`xl|w­»ÃÊ§Õ «Ù ¬Ù¢±à¨µèª¸é¬»í²»ï³½ð³ÃóµÆ÷·Åø·Èú¾Ìú¾Ïú¿ÎúÂÓúÁÖúÆØúÆÛúÊÜúÍàúÊâúËáúÊæúÎäúÐæúÓçúÑåúÓéúÒëúÕêú×íú×îúÛíúÛíúÝïúÙïúÑðúÓïúÎìúÐìúÐìúÐéúÐêúÐêúÒíúÏëúÑêúÎîúÎîúÔêúÐëúÓíúÐìúÖïúÐíúÕîúÐîúÐëúÌèúÐêúÈçúÊäúÃãúÂàú¾Ùú·Ôú²Òö­Êö­Èñ¤Æí§Ãë£Ãì©Áð§Áó¯Ãõ¯Ãø¯Çú³Îú³ÎúµÐú¾ÑúÁÚúÃßúÈâúÇäúÈåúÅãúÆåúÁãú¿Üú¼Øú·×ú³ÐöªÌñ¥Éì¤Ää¾Ù»Ó²Ë­È°Æ¦Å¦È¨Ì©ÐªÕ¬Û²æ§³ï®»ö±Áú»ÈúÁÌúÃÓúÃÔúÆÙúÄÜúÁÜúÂßúÇáúÆâúÊáúÌâúÎçúÒéúÎäúÎæúÐçúÐèúÎèúÐäúÐâúÊçúÑäúËâúÊáúÎßúÉàúÉáúÈßúÆßúÃàúÅÜúÆÝúÃÝúÁØú¼Ûú¹Úú¼×ú¼Óú¹Òú¾Òú¼Ðú¼Îú¹Ñú»Íö·Ëô³Èó³Æï³Èê¬Áæ¨¿à¤»Ü¹Ö³Ò±Î¯Ê«È¢¿¨½¡¸ ´±©¨{§w¡{trl|b{_|rYuqWu`QkdMgbSibOd`UfdWllWnn]kr_ku[owWou_rrUooQn|_qbqkzq{fgMtQFfMB_QB_OK[UFWO?YQF[SD]QM]U?WQI]Q?]SD]QF]MFYQD]OKUOD`WI[QBYUI_SD_SK`YOgukt®¶¯·³·µ¹¹º¶º¸¸¢»»¢¹» º»»·¢½»£»º¡¼»¢¹»¤»¼¢¼¹¢»¼¤·¼¤½»¦¾½¡»¿¡½½¢·¼¤¾¼¤½»¢º»£½½ º¾¦¿»¤»¼§¾¾ »½§»¾¥»½¡¾¾¤¼À¢¿»¦»º§»½¤¼¼¥»¼¥¼¿¢¾º¥¾»¡»»¢¹º£¼¾£¿½¦»»¤»¸¸»£º½¤º¸¹º¸¼£º½¡¹» º¹¢¸»½¸£··¢»¹¡¼¼¡»» ¹»¡ºº ¹¹¤·º¢»º ºº ¸»¡º¹¡¹· º·¡º· »»£¹»¢¸¹¤·º¥ºº¡¸º¢¹¹ ·»¢º· »¶¤¹¹¡»´·¶¤¸·¸» ¹»¢º¹¤¹·¹· ¹¹ ·· ·¸¶·····£¶·¡··¡¹··¹¹·µ¶·¶··¡µ³·´´· ·· ¶¶·¸¡·µ¹¶´·¢³³¶··¸ ·µµ´ µ¸ ³·´·µº¡¶³ µµ·´ µµ¡···· ·¶µ³´´·³³°³µ¡²´³±³³³² ²³·³´³¢³³´³ ³±°±³³³³´´³±¶²¡³±µ²´³®²±³³³´­³°³³¯°³°³³¬±²³³±¡±°®±¯³°­®¬®¯³¯°­®¯²²±³°±¯¯­±²¬°°®­®®²²­®¬¬¯±¯¬­®¯­°°¬¯±°¬«®¬¬®¯­¬z|~| ¡£¡  ¡¡   £¡£¢¡£ ¡¤ ¢  £¢¡¡££¡¢¡£ ¡¤ ¡£ ¡£¦£ ¢¥ £¡¤¢¤¢¤¥¡¦ ¤¥§¤¡¤¦¢¢ ££¦££¥¦§¦££¦¥¥¨£¨£¤©¥£¦¤§¤§¥¦¨§¢¥¢¥©¦¥¤¦¦§¦§¦¥¤§ª«¥©«¤¥§¦¤§¨ª¥¥¢ªª¨«§§¨¦¨§¥§©¨¦§¨§§©¬¥¨¦¬ªª§ª§©¨­ª©«©¬ª¦«¨©ª­¨¬««¨§¨¨£¦q~[iKzQ8nQ=YU?WQ?WF8SK5QB5QI=SMB[~{oÎ¡óµªô«µà´½u¤~]b¥¾q[lMunSkgUklOktQlxQqrYn|drrz£~´ÀÇÎ¤Ò©Õ®Û¡®á¨³ä©·å«¹ë¬»ì®¾ï±¿ñ²Ãö²Åù´Æú¸Çú»Ðú»ÒúÁÎú¿ÕúÃÖúÈÙúÆÙúÆÜúÈÝúÌàúËãúÊÜúÍàúÍâúÎãúÍåúÓæúÓçúÓèúÖçúÖêúÖêúÒêúÒéúÌèúÉèúÊäúÉæúÌæúÎèúËçúÌèúÎéúÐçúÎèúÎäúÎçúÕçúÑçúÒêúÑêúÒêúÎãúÏäúÌèúÌåúÈãúÇãúÃãúÃàúºÙú»Õú°Ñú­Ëð£Çð©Áê¡Àé¿è¡½ì¨½î¦½ï§¾ò«Áø®Åú­Éú«Éú±Îú·ÎúÀÖúÄÙúÌÞúÉâúÈäúÃãúÃßú¾ÝúºÚúµÖú¬Òù¬Îó©Æñ¤ÂéÂâ½ÖµÓ±Ì«ÉªÈ¦È¤È¤Ç¥Ê Î¤Ò«à¡¬ì­³ô°¾úºÃú½Êú¿ÐúÁÒúÃ×úÃÙú¾ÝúÀÛú¾ØúÃÝúÉÞúËÜúÉâúÉãúÊáúÊàúËáúÊáúÊâúÍáúÌáúÉãúÊàúÊÝúÄÝúÅÞúÈÛúÅÚúÁÜúÃØúÁØúÁÕú¿ÕúÀÚú¾ØúºÕú¸Ïú·Ðú¸Íú»Ðú·Îú·Ìú·Ìù·Çù´Æõ±Äó³Çî°ÃëªÀå§¾â¤¸Ü¡·Ø±Ñ¬Î«Ì§Æ¢Ä»¸´°®|§{ qtnnl`_~wSqnIldKg`Db[D[_F`[I]_Od`K`iM`dIbkW`qWfrSgu]grMkgKgqSg`ldwfrQqW:gF5_K?UI:UF:QI:SI5QI5QK8SM=UD5QI?QI:WK:SK?MK=SK:QI:OM:SD:UK?QO?UI?UO=UUK[ndl©²©´®´°µ·¶³¶²¶°´·´ ¶µ´¸·¸´·µ·µ·°µ³¶¶·³¸¹¶·¸¡¶¼¸¸µ··¸¸¹¶»´¹¡¸·µ¸»·¸»µ¹¼»£´¸·¶¡¸· ·» ·¸ ·¼º¶³¹»·¶» ·³·¸¶¸²»µ¶··µ¸´´²¸µ·µ·´·²¸¶¸·¹³·²´µ´µ¸ ´··´µ·´¸µ´³µµ·´·´µ³µ³´±µ²¸·µ³¶²³³´´µ³µµµµµ´µ´³³· ²³¶³²´³´³´±·²µ®±µ³²µ³²²±²´²³³³²³±³²¶²·²³³³²³±²³³°´²³²³¶´±²³±²±°´®²³°±³°³°°¯³³³°±°²°±²®°²±µ²­¯³°³¯®¯³®³¯¯®±®²«®¯³¬±­¬®®®­¬¯²¬¬®®±¯®®®«°¬«®±¬¯¬®°®°±¬­¬³¬­¬¬­­¨«¬¯­¯¬®«­®«¬««©­¬¬¬«¨«®©°ª©«¬¨¬©«¬«©¬ª°«©«®ª§¬ª§«§¬ª©««§®©§ª©©¨§­«¬ª©¦¦ª¬« ¤ ¡ ¡£  ¡ ¢ ¢¡ ¢ ¡¡¡¡¡¤    ¤£¡¥¡¡¢¦¡  ¤¡¢¥¤¢¡ ¢¤¥ ¨§¢¤¤¢¥£¥ ¤¡§§¡£¦¥¢¥§¡¨£¡¡£¥¥¢¤¤¨¡§£¦§§¢¦£¢¤¨£££¤¦¨¥¤¦¦¤§¦©¤¨¨¨¥§¥©£¥£¥¢¨¤¨¤§¤¨§©§§¥§¦¨§¨§©¢ª¦©¥¬¤¨ª¬¤¦§ª¨ª«ª¤¬§©§­§¬ªª¨ª§¬«¬§ª¨«¦«§¬¬­¦®«««®¬¬«¬¬®ª°©¬£©¬««®§­¨­«¬«­¬­¬­§­¬±ª®©ª©­¬¯°¬ª¯¯°«­¬¯©®«°®®©°©²¬®­±­°¬®¬²®±¯­¬¯­¯¬²°°ª­­ª{¤uuW]IxSMkWKbWKbQK_UD`OD]QD`SF`tuo¿¤ð¹¬ø´ºê¾»{¬dt³¶|gq_~{`tn`wq_uu_z~`zz`xi{u¨·ÃÄ¥ÒªÔ¬Ö ­Ü¦±â¬·ç«ºê±¼í°½î²Âò¶Æô¶Èø¸Éú»Êú¼Ëú¿Òú½ÒúÃÔúÅÙúÊÙúÉÜúÊÝúÊâúÌÞúÎâúÏâúÍâúÓåúÐèúÒéúÓëú×éúÕèúØëúØíúØíúÙîúÙïúÙïúÖíúÑéúÐíúÑèúÖìúÔëúÖéúÓîúÓëúÓëúÕïúÒíúÕëúÕìú×ðúÕïúÒîúÔíúÔíúÓíúÑíúÐìúÒëúÐèúÌèúÇäúÁãú¾Ùú·Öú°Òõ¬Ëò®Æì¬Åî¦Ãï¨Âï©ÄñªÂñ°Æø²ÉúµËú´Îú³ÒúºÕúÃÖúÆÞúÍâúÒäúÕæúÓëúÌìúÆçúÃäú¾Üú»Ûú·Öú²Ñù¬Îó©Êï¤Çç¡¼à¹ØºÔ²Í­Ì¯Ð¬Ò­Ì¯ÌªÌ­Ù¬á¤³ì®·óµÃú½ÈúÃÎúÃÕúÊØúÉÜúÈâúÁáúÃÞúÆßúÊßúÎáúÏäúÐéúÐçúÎåúÑèúÐçúÐæúÒçúÐçúÌèúÒçúÍäúÎãúÍãúÊäúÇàúÇÝúÆàúÆÝúÅÝúÅÜúÅÚúÃÛúÁÛúÂÙúÁÖúÂÕú¿Óú½Ñú»Ôú¼Ïú»Îú¼Îú»Ì÷¹Ëó´Èï±Åí¬Áê¬Àâ¥½á¥¹ßµÕ²Ò¯Ì¯Ê¬Æ¥Á ¸¸µ±«¦¡{urqniz[|oQqlQndSi`Qf_Sg_UkiQnfSko[ioUkn`ku[nxboiu{[ww[wbqnwu{ktSxUKiO?bQK[MDYSI[UK[QD`UI[UDWSB_KF]MK[SF]M?[SM[SF_MK_SIWSD_KKbUM[UB[SI`WIb`]g{xu¯ ´°· µ» ·· ¹¹¡¹¸£¸µ ·¸·»¦¼¹¤¼»¡¹¹ ¹º£»º¢º¹¥º»£»¾ ¼¹¤º¾ ¸¼¥¾»¦·¾¢½»¥»»£½¾¢¹¹ »½£¾¼¥º»£»¼¢¾½¥½¾¦¼½¤¼½§»¿¥½¾¤½½©¼»¢¼»¦»¾¥ÀÀ »¹¦º½¤º¾¢º¿£»º£»»£¸¼ »º£»¹¥·¹¢»¹¢¸¼¥¸º¡»·¤»¾¦»»¨»»¤»¹¢»º¢»º¡º¹¤¸¹£¹·¥»¸¦º· ¼·¸»¢¹¹ ·º¤»¸¡¹º¢»¹ ¼¶ ¸¹¤µ·º»·¹¡··¡·»¤¹¹¥»¸¡¸·£ºº¤··¢¸»¡¶º¤¸¸¤º¶¤·º¸¸·¹¢·· ·¼·µ·» ··¨·¹º´¢·¶ µ¶··´³ ¶´¡¹¸¢···· µ³¶·¡µµ º¶·· µ»¡º³··¡··¢¹·µµ µ»···³¡·µ ³³··¶¶¡·³µ³¡´µ¤¶³·¹³µ¡³¶¢·³¶´¢³¶´´³³³±³¯³´µ³ ³²³³³¶³³²¯±³±²³²³´³²´±²³³°³¯²³¯³´®³³¢±¯³³³²±³°³±°¡³²²±³³±®³³°°³¬®°³±²¯­±°±±±¯®²³®°®²¯¬­®²¯´«®°¯®®®¯­­¬®®°®¬­¬¬®±¯°¬¬±²¬¯±¯®­±|{~|~ ~¢ ¢ ¡ ¡£¢¢¡£¡¡    ¢¡¢¡  ¡£¡¡£ £ ¢£¢¢¡¢¢££   ¡¤¥¡£¡¢¦¤¥ ¢§¥¤¦¤¥£££¦££¤¡¤£¤£¤£¤§£§¤£©££££¤§£¨¥¦¦§£§¦©¤§¦¨¤£¦¨£¤¨©¦¦¥¦¨¤¦«§£©§¤¦§§©§¨ª¤©¨¨©¨¥ª¨©¨©¥©©¦©¨©§¨¨§ª¨ª§©§§«ª¥¬¬©«ª¦­¬ª§®§«©«¨¬¨©¦ª£~¢qxS]DqM?`Q=]S=UK8QI:OIBSM8UM8W`_f¥è®ñ°´è²¿w§f zÁ°tWoWxw]tiWrnOqrSlxSkxUt_qkx|±¿ÄÊÏ¥Õ®Ø®Ý£¬ã¤³çª¸è±·ë®½î²Áñ®Àõ³Áø·Æú³Äú·Êú»Ìú½ÎúÁÏúÃÖúÁÖúÆØúÆÙúÈÜúÈÙúÈÝúËßúÌÜúÏáúÍâúÐâúÐåúÎåúÑãúÒèúÕèúÖêúÒèúÔèúÑçúÐéúÒëúÏçúÑæúÎèúÐèúÐèúÒêúÒéúÏèúÏëúÍéúÒêúÐèúÓëúÎëúÒêúÓèúÏèúÎçúÌëúÌæúÌåúÊèúÀäúÀÜú¶Øú³ÒöªÊð£Æí¨Áí¥¾í¤Àì£¼ï¨¾ð¦Áð¬¿õ«Ãù±Åú³Îú³ÎúºÓú¾ÕúÀÙúÄÚúÌáúÒäúÐéúËìú¿ãú¿Üú¼Üú·ØúµÕú¬Ðö­Èñ¤ÅìÃæ¾Þ¸Ø³Ò­Ó«Î©Ë§Ì¥Í§Ê©Ê¨Ò¨Ó¬é¦°ñ¯¶øµÁú¾ÈúÁÒúÊÕúÆÙúÆÛúÄàú¿ÝúÁÜúËÜúÊßúÐâúÎâúÏäúÉäúÊãúÉãúÊâúÎâúÊâúÌáúÇáúÄáúËÚúÆÝúÃÝúÃÛúÀÙú»ØúÀÕúÁÙú¿Ôú¾Øú»Õú»Ôú¸Ôú»Òú¹Ðú»Ñú¹Ïú¹ÎùµÊú·Ê÷µÆö±Èñ°Ãï­Ãì©¾é¨¾â§ºá¸ÙµÙ­Ð®ÏªÊ£Ã£¿ »¸´±¬z¤utqoig]||YuuUqfInYFb_KbYBb_I`YM]bDb_I`gO_gMbkSfkUguWlz]lYkuSn|]nkngwYqdDgI:`B5UM:KK=MK:UI?SI8MF:QI?QM:SI8UM8WI:SK:SI5SI?QD5QK?QK5SK8WK8MI?OKBUQBWWQYzlt¨³§³°³±±²³³µ²µ³³¶·µµ´µ³·µ¶ ³¸ ¶··¸´¸µ¶µº´³··´·´¹··»·³¸´¹·¹¡·¹·¸µ¹µ¸·º·¸¶¹·¸¸¸¶¸¶··»¶¸·¸¡···¶ ··¡µ¹¸¹¶´ ¶·¶º·¶ ¶µ¸µ´¸·µµµµ¸¢¶³¸¸´·³³´·³´µ¸µµ²¸·´³¶²µ°¹·³³¶³³°´¶·³·µ³³µ³¶³µ´µ´´°µµ´°¶µ´³²³¶³³´··´³¶­³´´³³²±µ³®µ²²³²°³²²³²²²³±³¶²µ±´±³¯³±³³¶±³²´²³®³±²°¶¶´­²¯¯²µ²³®²²³°´°°³²¯¯®²¯³±°¯¬®±¬¬«®®°¯¯®­¯¯°®¬¯±®­¯«®­¬­¯±­¬¬®­©¯¬®­®©¯®®©¬¬®ª¬®®¬­¬¬¬®¬±«°¬¬¬®¬®®«¬¯©®««®­¬¬¬¬«¬¬«¨«ª«©©¬©«­©­ª¬­©©¨ª«¬­«®¨¨ª«§«§­«¬©¬«¬«®«¨ª¬¨°««©©§«ª ¡ ¡      ¢¡¢ ¡¢¡£¡¢¡£  ¡ £ ¥  ¢¡¡¥ ¡¢¡¡ £ ¨£¤ £§¡ ¡¥ ¦¡¡¢£ £¡¤¢¢¦ ¤¤¤¡¤£¤¤¤¢«£¥£¤£¨¤¦£ª£¥¤¨¥©¤¥ ¦¥¥¨¨¦¨¤¥§¦¦©¥¨¤©¤«§§¤©¤§¤¨§«§ª¢¬¤ª£«¨¬¥ª¤ª©ª¥¦§©¤¨©¬¨«¥©¥©§¬©«©¨¨ª©¯©¨¦¬§®©¬©¬§¬©¬¨¬ªª§«ª¬©¬ª±§¬¬¬©©«¬©«¦¬¬«§®¨¬¯¬«­¬¯¦­¨­­­ª¬©­«¬¬¬«¬¬¬®­¬¯¬«¬¬¬¯«°ª°­¯¬¬®°­®©¯©°°¬®®¬¬¬­¬³¬¬¬­ª«|¡bdOSMlWKiSKbUD`WK_WI]MF]OF`]Yf~ß­ô°°ì¢¹Ã²z°Á²|gbz`zl_~uWwwbwz`o|`{`uoz¢~¯¾Ã¡Î¦Ò ¬Ø¥¯Ý£°âªµè­ºé°¼í¶¿ð³¿ðµÄõ³Åö¸Èù»Êú»Ìú¹Ìú»ÒúÃÓúÄÖúÈÙúÇÛúÈÜúËÝúÌàúÍáúÎàúÓãúÏàúÓäúÐèúÓéúÐçúÓêúØëúÜíúÙîúÙðúÙîúÙïúÖìúÔëúØêúÔíúÖìúÒíúÛíúØìúÙðúØïúÛíúÚïúÕïúÚìúÖïúÖîúÓðúØðúÖðúÕïúÖñúÒïúØíúÕíúÏìúÊæúÇâú¾áú¶Ôö¯Ðñ§Æð­Æô¬Èñ©Çð¤ÃóªÃñ¬Æô®Æù³ËúºÎú¸Íú»ÒúÀÕúÁÙúÆÛúÍâúÖéúÜêú×ïúÎïúÆìúÀäúÁàú»Úú¹Õú·Óø°Ìô®ÊñªÉì§Áä¢»ÜºÝ´ØµÓ®Ô®Õ¬Õ¬Ó®Ó±Ð¯Ò°ã¬³ð³»ú¹ÃúÁÊúÆÔúÍÙúËÝúÌáúËæúËâúÎçúÌçúÐæúÒçúÒéúÓèúÑçúÖêúÒëúÑéúÑçúÑçúÑçúÍæúÈàúÉâúÉãúÈãúÇàúÂÛúÀÜúÃÛúÃÛúÀÙúÀÛú¿ØúÃÕú¾×ú¿Ñú¼Ðú¾ÒúÂÑú¼ÐúºÐú»Í÷¸ËõµÊô³Èò¬Æð­Ãï¯¾ç«Áä¦»Þ£ºÝ ¶Õ²Ð«Ï«Æ¨Ç¤Á¢·¹¡µ¯¤~¡{¡xutrkd{x[ulMxbQlfWnbMfbW_dWkfQkdSlk]kn[lq[lq]l|doluduzbuoutxk{zYtYMgQIiMDYOIYQKSY?_QM]O?UOF`QKYWF[QF[SFYSB_OF[QK]SKWQB][MbMK]QD]UO[WK]QI_WO`_[bqz¬¥³­·°·¢¶·¶¹¡¶ºº·¢·º ºµ¢º» ºµ¹» ·» »º»·¤¹»¢»»£¼º¤¹º¥»¼¡¹¹¡¸»¦º¸£¹¾¨»¼¢¹¼¢»¼¡»¾§·¼¤»º¢ºº¦»½¤·»¡¾¾¥¼¼¡»¾¥¹¿£¹¾§»»£½»¤¾¾§»¼¦¼¹£»¿ª¼¾¥»¼¡»¼¹¹§»½£º»¥·¹£º»£»¾¢¸º¤½º¹»¢¹¼§º¶¢»º»»¤»·¥»»»¹£»·¹º ¶¹¤»·¤¹»·¼§¹¹ ¹¸··¢·¸£º¹¡¹¼·¼¥»¹£·º¢·¹ ·· ·¹¥¸µ··¡¶º¥¹»µ· ·¸£·º ·¸¢¹·¦·»¡¸µ¹¹¸» ¶µ£¶¶ ·¼£µ· ·µ ¶º¢¶¸·· ·· ¶´ ·µ¡·¹ µº¡¸µ¶·¡´·¡¶³¸· µ¶··¶µ´·´·´·´·¡³· ¹³¸¶³·µ´·´µ¶¶·¡µµ¡´´³³¢¶¸ ±µ¶®³¯³°³²¶³¡¶³³°´³´°³µ´³°µ ±³³²°³³³°°³°¯²·³²°°²´°³³±²´±³®³³°²³³³°®¯´´´²®°±³®³¯±°°¯±±²²¬¯²®°¬¬¯±®¬­®³±±¬¬­±­­¯®¬®®°®®­°¬¯±­®¯¯°°®¬°°±¬¯®­®­¯¯«¬­­||~~|{~x|~~ ¡  ¡¤ ¡¡  ¢¡ ¡£¡¡¡  ¤   £¢¡¡ £¢ £¢£ ¢ ¢¢££¡¡ ¡¤ £¦¢£ ¢¢¨¡¤¥§ ¥ ¢£¦¢¥¢¤§¥¡¦£§¢¨¤¥¤¥¢§¦¨¤¨¡¤£¤¥§¢§§¥¥©¦¦¥¦¡¦£¨£¦¥¥¥ª£¨§©¥¤¦§¥¥¨¥££¥¨¥§¥§¥ª©¨§¨¨¨§§£¨¤§¥©¦§©©§©£¨¨§¨«¥§«¬ª©§«©¬««ª«§ª©«¨ª§©¡z]fIQ5gM5[K8SK8UF5SF8QK8SI8MO=]lrgÃç«¢ä¬Ãz«¤t¯Á¬|¨n[tS{gMqkOqnQnxOquOnUtdx~|§|·ÁÆÌ£Ò§Ö®Þ¦¯ã©²å«»éª·é¨»ì«¾ï±Áó³Àõ²Æù´Èú¸Êú·Éú¹Ìú¿Öú¿ÒúÄ×úÇÙúÊÙúÈÜúÉÜúÌÝúÎÞúÉÛúÎßúÌàúÑàúÑâúÑâúÏæúÓèúÕçúÓçúÒêúÐêúÌèúÏäúÑçúÐçúÒæúÐêúÒèúÔéúÓçúÑêúÒèúÓéúÔëúÓìúÔìúÙëúÖëú×íúÑíúÒìúÕëúÔëúÑèúÓêúÌæúÇäúÂäú·×úªÒò¥Ëí§Áï¨Ãñ£Áï¥Ãì¢Áî¢¿ï¦ÃòªÃ÷­Ãù³ÈúµËúµÐú¸Ðú»ÔúÄØúÎßúÖæúÙëú×ïúÒñúÀêú¾Ýú»Ùú¸Öú´Ñú²ÏôªÈô§Åî¥Ãæ»á¸Ü¸×³Õ±Õ¬Ô¬ÐªÐ«Ô«Ð¬Ì¬Ì¦Ý¬ê§³õ²¾ú»ÆúÅÐúÉÔúÉÜúÊÝúÎãúÊåúÊáúÍäúÑâúÏåúÌäúÏæúÐæúÍãúÌäúÍäúÏäúËáúÈáúÆßúÄãúÇßúÁÜúÀÚúÁÜú¼Øú»ÖúºÕú¼Ôú½×ú¹Òú¶Òú¸ÒúµÎúµÎú»ÎúºÍú·ÊùµËø°Éõ²Çó²Åð­Áí¬Áì®Ãéª¿ä¦¹á£µÜºÛµÓ­Ì¬Ì©È¥ÄÁ¹º³|«x«trroff~_|]z|YulQndMg_Df`Fb]IdYI``I_`Ib]D__F_bKdgQ`oQgw]gzWlYnz[l`lgnUl]:kK5`I:QD3UF8UI3OF5OD8QO5MF:U?5SI8OI?UI8QI:QK8UI:SF5OI8KI5QF8QQ=QF8SI:WK?QK5WYO]ro§±©±®´±³°³°²´²±³²³µ¶²³³¶³µµµ·³´··µ´··³³·³µµ·¶¸³º¶·¸¹¶¸···¹³µ··³··¹µ¹¹··¹··¸º¶¹ ·¸¡·»¡¶¹¸¸µ··¸µ··³µ³´¶¸¶²³°¶´µ´¸µµ³´··³·µ·´´³µµµ³·µ·³³´¶³³³´ µ³³µ´³·¶²³µ¶±µ³µ¡²·´³±¸²´°µµ¶²¶¶´´·³¸±¶´µ³³´·µµ³´³´´±³²²¯²³±¶²°´°²°°´¶±²³°°®±µ³¯²±³¯°°²°³²´¯µ°³­µ°²°´¶²±¯®°³°²³±²³°®®±³®¯°°¬²¯¯±²¯¬¯ª¯¬¬´¯®¬¬®°¬°­°¬¯­¯®¬°¯°®®®¬¬¯¬¯«°¯®±°¬¬«¬¬¬­«­«®®®­¬¬®«­¨¬ª­°««¬¬®¬««¬¬°­«¬¬­©¬«©«ª¬«©«¬¬«§¬«§«¦§­««¬¬«§ª¬©«§¬©©¬ª©«¬¬®©ªª««©«©©¨ª©«¨ª¥«ª¡  £¤£ ¢ ¡¤  ¡ ¤££££¥ ¢ ¢¢¡¥   ¡¤¥  ¡£¤¡¢¢££ £¡¡¡¦¤¢¤¥¨ ¤¡¦§¤¦£¥¦¡¢¦¥¢¥¥¥¤¥§¤££¤¦¥¥¢¤£¦©¤¦¤§¤¥¢¨§§¨¤¢¨¤¦¥¨¥¨¦£¨¤¤¦§¥¥¥¡©¦¨§¥¤¨¢¨§¨¤§£¥§©¨©£©¢§©¨¤¬¨§¨©¦§«¨¬¬§ª©¨§¨©¬©ª§¨¨¨¨«¬¨««¬ªª«©©©©¬¬«¨¬ª«¨§©«®©«¬¬¨­©ª¨©¦©¬¬¬ª¥¬«­­«ª±¨«¬¬«ª«¬«®¬¬ª¯¬¬«ª¬¬­«¬¬ª®ª¬¬°¬¬­­­¯®®­«­¬®®¯®°®®°¬¬ª¨ ¥nuY_MtQIgSI[QFbOD]SK[OF]QI[UF]bil£Ù¦àªÆ¬¿ ·¡È¿¤·¬t|`o[zo[t]t_x|]wd~ox ­»À Ç£Ê ¥Õ¬Û ²à«±è«·ë¯»é¯»ò³¿ñ°Áò¶Ãö¸Ãø¸Êú»Êú»Êú¾ÐúÂÐúÃÔúÈÕúÈÚúÏÛúÎÛúÌàúÍßúÎâúÐãúÍàúÐãúÐåúÕæúÕèú×éú×éúàëúÙïúÚìúÖíúÖíúÑìúÕèúÙìúÖíúÓëúÙïúÙíúÛíúØîúÖðúØîúÙïúÙðúÛòúÜðúÛóúÜñúàòú×óúßñúÚñúÞñúÛòúÙíúÓìúÏéúÆäúºÞú®Ùó¬Íó°Èö­ÉòªÅò®Ãô­Æõ¬Åö®Æö²ÈúµÇúºÈú»Îú»ÓúÃÓúÄÙúÊÙúßæúäíúìöúäøúÛöúÈïúÃåúÀßú¹Üú¹Öú¹Óö¯ÌöªÅð¬Åì§¿ã »Û ¸ÛµÜ¡¶Û°×²×±Ù°Ù°Ù³Ö²Î°Ù ¬ë¨´ô·ÀúÁÇúÉÒúÍÖúÓâúÕâúÓæúÓéúÒçúÙçúÕêúÖêúÕéúÓêúÔéúÔéúÔêúÕèúÐèúÍèúÑçúÎæúÊáúÊæúÇãúÃßúÃßúÆÚúÃÞúÂÝúÀ×úÀÙú¾×ú»×ú¾Õú¹Óú¹Óú¼Ðú»Ïú¹Îú¹Ìú¶Ìö·Èò´Åñ³Æñ³Äï®Áë­Áé¬¾ç¬¾à¤ºÝ´Û ³Ò±Ï¨Í­È¨Æ¦Á¤¹ ·³«z¤z {wonigb{r]qnYokUkiQkfUibWiiWdgQkiQfgUdiWgn]ixblloixfx~`tirgwoSn[InMK`QIYQB[MIUKKWQB[QI]UKYMFYQDYSMQWI[SFUQDYWK`MB[YIYOFYQFWSBYQD_MF[YM[WISWK`_bo{®¦´¬±³¸²·¢¶··¸¸· ·· ´·º¸ ¶¹£¹·¢·¸¤¸¹¤·º·¼¡»» ·¹¸¹¡¹¼¤»º¹º¡¶»¤·½£¾¼¤º»¦·¼¤¸º¤»»¥º¼¥»»§¹º§º¹¤¼¾¤»½£·¹¤º¼¥½¼¨»¾¡»À¤»¼§º¼ ¼»§·¼§¹À£»» ¹¼¤¸»§»»¡¹¹¡·»¤·»§»º¤»»¢º»¡¹»¤¸¼¤¹·¤»»¡º¾£º»¤¶¹¤¹¹¸º£·· º· ·»¤¹¹¡º¼¢´º¹·¡¹¹¢³¸¤·¹ ··¹¹§º»¤¸· ¶·£¶¹¡¹¹¡º·¢´¹¡µ¹¡¹»¦·¶¡µ¶ ·¶£·»£¹¸¶¹£¸» ·¸¡·¸¢·¸¢·¸ ···¹ ³µ µ¹¹º¡¶´³·¡·¶´¶³´¶· ²µ´¸ ¶µ³¸¢³µ¶¹¢¸¶µ³¶·¡³¹£·´··²¶¶¸¶¹´·¡°³´´¡·µ¥³º···¶¡³¶²³´´³¸µ³¯² ®µ±³³³²µ³³³¶ ²µ°°³±²°³³³³°±±³³±³³°´³°¯³±´²³¯µ¡°°±­³µ¬°²³³³±²³³¶±±¯±²±¯°±°¬³¯¯²³¯¯¯¯³­¯°®­²¬¯¯­®°±®°³±±­®­«­¬«­­¬¬¯°±¯¯¬°®­­±²¬¯¯¬¬®¯®±¯¬°{~|~|~|||  ¡ £ ¤ ¤¡¢¢ ¡¡¢¢¢¡¢¡¢£ ¡¢¢¢¤ £¢¡¢¢££¡¢¤¡¥¢¤¡¥ £¤¡¥¢¥¤¢¦ ¢¤¢£¢¦¦¤¢¨£¥£¥¢¥¤§¢§¥¥£©¤§¢§¥§£¥¡¤¥¦§§£¦£¥¦¦¦§¥¦£©¥§¤¤£¦¤¥¨§ ¨§¦ ¨¤«¤ª¤¨¨©§¦¨ª§¨¤¨¨ª¨«¦©§¦¥§¥«¦¨§¨¥«¨§¦©¥«ª§¨ª¦¬¥ª©§§¬¢¨¡dqMW=rK5bK=YM8WB?UD5WD?OD8UB5WQDU~xqÈÓÊ¢Ç ´ÇÏ¤»³f~SnSwlUtWt~MwxWrYz`zu|¤|¶¹ÄÈ¡Î¥Ö©Ü¢®á¥¯å§·ç§¹ì®ºð°¿ï¯Àñ³Áö²Ãö³Æø¶Èú¹ÊúºÎú¾Ðú¿ÑúÃÕúÃÔúÇ×úÆÙúÈÛúÉÝúÈÜúÌßúÊÜúËàúÌâúÐãúÒâúÍäúÖçú×èúØèúÎèúÒèúÌçúÏäúÒæúÓêúÕèúÙéúØéúÕìúÕìúÒìúÖìúÒëúÖìúÖíúÙïúÙïúÙïúÙðúÕïúØíúÛíúÜðúÖíúÕíúÐëúÈåú¼ßú³Ùö¦Ðï§Èñ¬Áò«ÆðªÅð©ÀðªÁð§Áô¬Äõ«Áõ«ÂöµÇúµÌú·Ìú¾Ðú¿ÒúÈÚúÚÙúíçúëðúã÷úÔðúÄêúÀàú¼Ûú·Öú²Îù¬Êô¬Åò©Ãë¦»ä¹ÝµÙ²Ó¬Ù­Ø¬Ù±Ó¬Ö«Ø«Ö­ÑªÊ¨Í­Ü®ì¬¸ø·¿úÄÊúÅÔúÌÙúÎÝúÔãúÌåúÎâúÒçúÔêúÒæúÐäúÐäúÓæúÒæúÒèúÎæúÐçúÍãúÅãúÉâúÈàúÄßú¾ÚúÀØú»ØúÀÚú»Øú»Óú½Öú¾Ôú¸Óú¸ÔúµÓú³ÏúµÌú³ËúµÊ÷±Ê÷°Çô­Äñ­Ãñ«Âï¬Áéª¿ç§¾å¤»ß¥¸â¢·Û´Õ°Õ¬Ï¬Ì§È¤Ä¤À » ¼²¬r otqon_~_x[zrQwnKokOkdKg]Md]F`]Dg]D`dFdYK`YDbdI`lMdlQf~glgu`o{UrqYgtIi]=bK:YB3UD5QF5QF8KF:UI8SD:SI5MD8QD:QK:OI:SD:YM8QD:WF:QQ8UI:SF5UD8UI=UQ8SF:SM:WO?U`]fxx¤°¥±®²±²³³°°´³°´³¯µ³³µµ³³³³´´·³³µµ³·³°²¶³³·´¸··¶µ·µ¸´µ³´¶·¹·µ·µ·¶·¢µ»·º ¶·¶·¶º¡¸¸ ¶·µ··¸¶·¸¸·¹µµ¡·¶··´¶¶°´·³´µ·²¶´¶µ·´µ³¸³µ·³³¸´µ³·µ´´µ¶µ³´³´´³·´´µ³³¯´²´·³³³µ±²¶µ³µ´´´´²³³³±³³³³°³³²²´³´´´´±®³µ³±²³²¯´²²±°³²²±³³²³²²²±®°±®¬·¯°³°¯±°²°¯²³°³³²²±²³®±¯°°¯°²²³±±²±¯±³°±°°°«µ±°­¬±®¬°®®²°®«¯®­°¯²°¬®®®¬«­®®¬«¬¬°­®«¬­­®ª­¬®®¯«¬¯­­®¬³«­®¬®­¬®­«©¯««­©¯¬¬¬¬­¬¬­«««¬¬¨¬­¨ª«¬«©¨««©­«¬¬¨¬¬¬¬©¨©©§­§«©­ª­«¨§­¬©¨©«¬¨ª©«¬«©¬©¨«¬©¨¬      ¡¢¡ ¡¢   £¡¡¡£¢¡¢¢¢¢¢¢£¡¢ ¡ £¢ ¤¡¡ ¢¦¡¡¡¡ ¡¦¤ £¥ £¡¡¥¥ §¥¡¢¥£¤££¥¥£¤ ¦££¥¥¤£¥¤¥¤£¢¦¦¥¤¤¤¤£¥££¦¦¤¥§£¨§§§¦¥¦¤¤¥¥¤¦¦¨¨¥§£¥©¨¥¨§¨§¬¦§¬¦¨©§¦«§§©§¥¨©§¨¦¬©¥¬©§¨¬¨«¨©¥©ª¨¨ª¨§ª«©®¬©ª¬«¬©ªª¬¨ªª¬¨¬¬¬¥©¬ª©¬§¨¬¬¨«¬¨­¬©¬ª©¬¬¬¬¬¬¬­¬¬«¬¬«­°¬­¯¬®¬ª¬®¬«­­¬®¯§¬¬¬¬¬¬­¬®®­¯¬«¬§©¥¥o|]bSw[IoSI]WD`QI[SB_SKWIF[KD]YK[lkn¨×Ù¤È¨Ç¤Þ£§ß²È¬¸u_q[ubw`w]xb|f|o|~©¶¼Æ¡È¤Ò¦Õ£¯ß¥³æ­µé¯»ë°¼ï°¾ñ·Âò±ÄóºÄú·Èú¹Éú»Ëú¿ËúÁÎúÃÓúÄÔúÇÛúÅØúÈÛúÉÛúËÝúÎÞúÎâúÎÝúÐÞúÑâúÐæúÔæúÖåúÕçúØçúØìúØëúÖçúÒéúÒçúÖéúÚìúÙìúÚíúßïúÜðúÙñúÝîúÛðúÙñúÛðúáòúßòúàôúàõúâõúâóúßòúßðúäôúàòúÛòúÛïúÒíúÌæúÃâú¶Üø¬Ïô²Íö²Çõ³Åó¯Äô³Äô±Ãõ°Äõ´Åô³Äö·Çú¶Æú»Îú½ËúÃÐúÆÖúËÜúÝÝúîèúííúéôúÛïúÌèúÈâúÁÙú»Øú¶Òù³Íó°Èñ¬Âï§¼ä¡ºÜµÕ®Ú¬Ù¡­Û­Ü¡¬Ø°Ù °Ü¯Û±×¯Ò«Ì­Ù±ë­·ù»¿úÆÌúÌÔúÓÞúÔâú×äúÕéúÙèúÝìúÖíúÖìúÖéúÕîúØêúÖêúÙìúÖìúÕëúÍêúÈêúÊåúÈäúÃãúÂâúÃÞúÀÜúÅÛúÃÚúÃÙúÃÙúÁØúÀ×úÁÖú»Òú»Òú»Îú¹ÌúºËúµËù¶Çö´Ìó¶Æó³Ãð°Ãï¯¿ê®¾è¬¾æ§»æ¦·ã¦µÜ¡µÛ²Õ°Í°ÌªÌ¤È¨¿¢½¹®§¤zutio{gzx[zw[nqWniYllWifWlfSngUfiUddUibSglYdoWdwbornrzlzdww`onUkWFdUF_MB[SIWQIQODUMIWUB[OI[UKUQBUOI[QFWSO]OB[UB[SK]UDW[I[[I[QK]SD]OQSQB[QI[UFYYSfiiiª¤·©·¯´³·µ·¢µ¶µ¶³·¢···¹µº¸·¹¸µ»¢¹»¢·¼ ·»¡·º¡¹¶¶º¤·¹ ¹··¾¡¸» ¸¹£·»¤¹½¡¹· ¹¾¡»¼¤¸½¡·»¦º½§»»¢»¿¢·¾¤º¾¢¹»¤¸¹¤¼»¢»»¦º»¥¹»¤»» ¸¼¤·»¢»º¡¼¼§¹»£»¸¤º»¡¸»¤¹»£¸¹¢¶»¡µº¼ºº»§¶·¸¹ ·»¦·¹··¢·¹ ¹º¡¹· ¹º§·»¹·¡º»¤³º ¹¼¡·º ·º¡·¸¡¶º¹µ¤¶·¢··´»¢¶¸ ºº¶·´·¢¸¹ µ»¡¶´·¸¸·¥´·¥··³º¤·»£·º³· ´··ºµ·¤¶·£µ¶¶·¤·¶´³²±³·±´²¶¶³¡¯µ¥µ´±· µ·¢¶¶´· ¶µ´µ¥¶µ´¶³·´·³µ ´³··¢³µ±¶³º±² ³³ ³·³¹³·³´µ¶³³³µ²´³³³³¯¶ ²·´³°³®°°³­µ³³±±¯³®´°´´´®¯´°°±®°±³²µ®µ°²°¯¯µ°²±°²²¯¬¯°¯²¯³±°¯´¬­¬³®²°°¯­²¯¬±®¯¬±¬±¯¯¬®®­­­­°®®¬­¬¬®®¬°¬«¬¬«®­¬¯®¬¬­°­®¬®­°¬¬««¬|z{||{|~~|~¡  ¡ ¢ £¡£ ¢¡  ¢  ¡¡ ¡¥ ¡£¡£¡¡¥¥¡£¡¤ ¤££ ¤¥ ££  ¤¡¥¦¥££¥¦¢¥£¦¥£¦£¤¡§££¦§¡¦¥¤¢¥£¦¤¡¦ª¤£££¥¢©¤§¤¦§¨§§¢¢©¥¨¢£¢§¦££©¦©§¨¨¨¦¨¥«¥¨¦§§¨¤¨¥ª£¦¨©ª«¦©£ª§©§©¨¬¨§§©©¨©©¨§§«¦§¤¨¢¦£t~U`DxM:lI:`S8[I5[F8SI8QI=M?8UI5UUMd|oÊÛ¾§Ó£ß©²à°Ç¬¯f|YnKkSn|[rUw]u_|d|r¤x³¹ÀÁ¡Ì¥Ò§Ú¡¯ß£²ä¨µé«ºë®ºì«»ð«Áñ±ÁöµÅ÷³Äú¸ÈúºÎú¼Íú¿ÑúÁÒú¾ÓúÁØú¿ÔúÅÔúÇÙúÆÛúÇÛúÆÜúÇßúÊàúÊàúÍßúÎàúÐãúÓâúÐäúÐãúÌäúÏãúÌâúÐæúÕãúÖêúØíúØëúÙîúÖíúÜîúØïúØîúÛîúàñúÝôúÝðúáñúÞðúÛóúÙðúÙïú×îúÛðúÕìúÐéúÌåúÅáú¹Ýú¬Õó§Ìð§Èð¥Ãï©Áï©Âð­¾ð«Áî¬Áð§½ð¬¾ô«¾ô¯Âø´ÇúµÊú¸Ìú¿ÎúÁÓúÊÕúÚÛúØßúÎâúÊßúÃÛú¾ÕúºÓú³Ðö®Èñ¬Äï¥Áå¡»áµÜ²Ñ®Ì¨Ë Ð§Ó¦Ò¤Ñ©Ø¬Ö©ÕªÑªÍ¥È§Î©â§±ñ²¸úÂÇúÆÐúÏÖúÏÛúÏãúÓâúÒçúØèúÔêúÒéúÏçúÒçúÎéúÎçúÑäúÑãúÒéúÌçúÇæúÃãú¾áúÀßú·Ûú»Øú»Ùú¿×ú»Ôú»Óú½Ôú¿Óú¼Òú»Óú»ÑúµÎú´Ìø°ÊùµÊö®Çõ­Áò­Åñ­Ãí¬Áí©½è§Àä§¼â£·à£·Þ³Ü®Ø³Ó®Ð¯Í©È§Ä£Ã »·°©{£qqnqkb|~[||]ttWrnQokMfdMk`If]ObgKg]D`YF]]I`[D_bF`kQdrQfxdnit]rrQlqMgU:fD=]I8SB3WB5OIBKB5SD:YK:IO?OD:QF:QD5SD5UD:MF5UI8SKBSK=UI3UI8MBBUF8QI:UD=YK8SM:U[O]l_k|¢ ±§²­°±®­®«°°²±±²³²²µ±µ³³¶³²°³²°³³²·³³³·³µ®·µ¸µ³¶´µ³¶·¡µµ····µ´··¶¸µ¸·¶¸¸³·¸·¡·»²·´·º·³ºµµº¶µ¸ ¶¶³´··´···µº´²µµµµ²´³´³·µµµ³´³³¶³·³´´´²´´µ°³³°²·³µ³·¶´³´³³µ´²³³µ¶´´´µ²®´´³³³³µ³´°²³´´±³³²³³²±³²²³±´²²®³³´¶²°±²µ³¯³³²±³±°°³²²²¯±²µ²¯²°±²²±²±µ±³®³±³±­²³®°µ¯±²®¯±²²±°²®²°³²°¯°¯®¬°­°²¯®­¬°°¬®¯­®®±­­¬¬°¬¬¯¬°®¯¯­©¯®«¨®ª¬¬­¬¬®®­­­°®¬¬¬¬­¬¯­­¬­¯¬««¬¬¬­«ª¬­¬©«­««¬«©ª«¬«ªª­ª§ª««ªª§©¬¨¨«¨¨©§¦©©«§¨ª«¥§¨§§¬¨§¬©©«©ª§ª«©¨«§¨©« £ £¡¡£ ¡   ¢ ¡ ¡ ¡ ¢ £¢ £¤ ¥¢¤ ¡£ ¤¡ ¢ ¢¥¢¢ ¡¤¢£¢¦¢¤¡£¤ £¤¡¤¥¤¡¤¥¢¥§¦¡¢¡£¤¥¡¤£¤¥£¢ª¥¦§¢¥¤¤§¤§¦¡¢¢§¥¥©¢§£¦§¦£¥¢§©¦§¨§£¨ª¥§§©¦©¥¥¤§¨¨©¦¤§¦¨§¥©¬ª¤¨«ª§¦§©§§­¦§¨¦§¨¦§«¨«ª¤¨¬©©­§¬ªª§¬§¬©«ª®§©ª¬«ª§ªª«¨©«­©«¬©¬¬§«ªª©©­«¬«¬¯¬­ª¬¨®ª¯¬©­¬«¬¬¬®­¬­­¬®¬¬­©¬®¬«±¬°®¬¬¯­®­¬©­¯®¬¯ª­¬«¦ª¤irSdKzQFd[MbYK]QD_QI]QIWMFYQF[[K[uxqÀáÆ¬×­¬ñ°¶ìª½Ð°¶n¢`w_t`~g|f{gxilz¬´¶ÀÅ Ê¨Ö¡¬Ý¤²ã«µè¬ºë¬¸ï³¿ñ°¿ò³ÁôµÆ÷¹Çú¼Êú½Êú¾ÐúÂÒúÄÑúÇÕúÆÓúÆØúÈÙúÊÙúËÝúÌÛúÐÝúÎàúÏàúÒäúÍâúÒàúÒäúÓäúÕæúÔçúÔéúÐçúÖæúÐçúÕëúÛéúÝíúàïúàñúßòúàñúÞðúâòúáôúäõúèôúáôúàöúãóúèõúáõúåôúÜòúÞðúÝîúÕðúÐìúÐæúÈãú»Üú¶Óô¬Îô¬Èó­Åó¯Åï®Áî²Àñ°Áí«¾ìªÁï¬¾ò®¾òµÃùºÃú»Èú¾ËúÁÐúÁÒúÄÕúÎ×úÎÛúÉÙúÄÖúÂÔú¾Ôú»ËùµÌö±Êò¬Ãì§¾å¡»Þ³Ó°ÌªÊ¤Ê¢Í¡Ï¥Ó£Ö¬Û©ØªÛ«Ö«Ò¥Ì¬Ì©àª®ò´ºú¿ÃúÅÌúÍÛúÑÜúÑáú×æúÖéúßëúÛëúÖîúØìúÙíú×îúÖíúØëúÖìúÙìúÐëúÎëúÈèúÂãúÀáúÁàúÃÝúÅÛúÄÜúÁÖúÂÙúÃØúÆÖú¿Öú¿Õú¾Óú¸Òú¹Ðú¶Íù´ÌõµÌõ´ÆôµÆò®Æð²Áî­¿ì°¿é«¼ç¬»æ¨¸à¤·á¥·Ü£´Ú±Ó­Ó­Ï¬Ì¨Æ¥Á¢À¡¶³­{£z¡wtolkb{{]wx_rrWnlYikWnkYgrUogUibSi`SkdQikUfr[bzbinooufwt[roQkYIfMK_OBYQFWQI]OISQD_QIYSIQU?WOFWQISS?[SK]SDSQBWSB[SK]UB]MF]KIUSKYQD[SKYUI]SF]]O_gfixox¡©¡²ª³ ¯³³³´µ¢°³¶´±·¶¸¡´´·¹¶· ´»»·µ·µ¶ ·¸¤¸¾³µ¡µ¼ µ¹£µ¹·¼º»¸¼§·· ¸»¢¹»¥¸» ¶¼¤·»£»»¤»º¥·¹¥¸»¢»º¥ºº¡¶»¥»¿¡¹¼¤¶» º»¢¼¾¥¹º¹»¢·¼£¼»¡¹»¤»À¥¹º£···À¥·¹¡·½¢·¹·¼ ¹¸¡¶»¢·¸¡µ»¡·»¶¼··¶¹¥·¸¦º¸¹»£¸¹¢·¸¡·¹ ºº¥µ¹¢¹¸ ¹¸¡¶·£¸¹µº¤µ·µ·¶ºµ»¶· º¹¡¶· ··´º ¶º ·¶·¸µ¶ ³¶¡´»¶¸¡µµ µ³´··µ¢¸µ´¹·¶³··µ´¹³¹ ´µ¶¶µ¶µ· ·¶£·µµµ´µ¢µ¸¡·¶¢³³£²¶³¸³¸³´ ´¶¶»£´¶·´µ¹¡³¶¶¶ ´··¶³·µ¶³µ ´µ³µ ³³¯´´´±´²°µ´°µ²³°³±³²³³µ³³³³°¯³³±³±³¯·³³²³®³®³®³°°±®°³±²­´¬­¯±¯µ°¯®³®±±°³³®³¬®¯¯­¯°­­°¯°¯¬­°±­­¯¬­¬°¯¬®®¯­¬¬¬®¬¬¬¬¬¬­±­°¬ª¬°¬¯®­®¬ª¯¬®«¯®®®|~|zz{~~|~{~| ~ ¡ ¡¡ ¡¡¢¡  £¡¢¡¡¡ ¡¡¡¤¢¤¡£  ¢¡¤ ¡¡£ ££¤¢¡¤£¤¡££¤¢¥¡¢¡¦¢¦¥£¢§¢¢¤¤¥¥£¤££ ª¢¨£¦¢¦£¥¤¨¤¤§¦¡¤¦§¤¨¥¦¨£¥£§¦§¤¨ª¤¢¨£¦¡¤£¨¨¥¢¦§¨£¬¤¨¤¨©¨¦©¤§¥¨¥«¨§¦¬©©§ª¦¬£§¦¦§«¨­¤«§§©¬§ª¡¦¤¥£¤xdrM]DoODbK=`QB[Q?UI3SI:QI:UB3QF:QW[d¡|ÑÍ£Ñ«¬ó³²í¨ºÍ´¬k¡Yu]qWt{_w`w]zb|bq¥|®³¹ÁÇ¡Í¤Ù¡­Ü ®ã¡¸ç§·é§¸ë©½ï¬¾ñ¯ÀöµÂ÷µÄú·ÉúºÇú»ÌúºÐú¾ÑúÁÒúÂÔúÄÖúÁÔúÅ×úÃÖúÉÚúÇÙúÊÝúÈÜúÊÜúÌáúÍàúÎßúËâúÎâúÌáúËäúÎãúÒãúÒçúÖèúÜèúÙìúÛíúÙíúÜíúÜíúàîúÜïúâðúãóúáóúÝóúÝðúÛóúÜòúÖðúÙïúÚïúÖíúÌêúÆäúÂáú½Üú°Ôõ«Íï«Æî«Áí¥Àò¨¾í§¾ë£¹ä ¸å¤·á·ã²ä£³è©·ò±¹ô®»÷³ÃúºÆúºÇúºÌú·Ïú»ÎúºÌú¹ÎúµÊù³Êö°Äñ®Ãé£Âç¸à´Ø³ÌªÆ¡Á»¾¿ÆÈÎ¡Ê¥Î§Ó¦Ï¦Ë§É¤Á¥Ñ©ì¬¬ú´Áú¾ÃúÃÎúÅÔúÈÜúÐßúÓãúÓçúÕæúÕêúÕéúÖêúÔèúÓèúÒèúÒèúÓéúÐèúÈæúÅáú¼àú»àú»Üú¼ÙúÀÖú¾Õú½Õú½Ôú¾ØúÁÒú½Îú¹ÎúºÑú·ÌúµÊö°Éö²Äô®ÅðªÃï¬Áì®ÂéªÂç¦»ä¥ºá¦¸Þ§¶ß¡µÜ²Û²Ö­Ó±Ñ©ÑªÉ¨Æ§Ã»¶³®x¤tnlgd`{Yz{YurUnnOikKgfKgbIi`KfdQgdIdbDf]F``?``FdgUbt]i{`fdqYolKl]=`D:UB5YD5OI5QD8QI0OD=SD=QD:QO:YI:QD5QF5QI5UF5OK8QI5QD5OI8SM8OD8SD=QD?QI:QI:QS?QMF]d[g|tt¥©¨«¨®¬¬«®­¯¯®¯±²²®¯°³³¯³³³³°²®²±¶³µ²³³²´µ²···µ·´·²³·³±·²¶µ¸µµ····¶¸²·µ¸º¶µ····µµ³´·²¸²·³µµ¶³µ³¶··³µµµµ´²µ³µ²¶±µ²²³µ²³·´³³³·²µµµ´µ¯µ³´³µµ³²³³µ³±²³³²¯´°´±²²´µ³±²´¯²µ³¶±³®¯²´³¶°²³³¯°²µ²²³³®³³²²²­±±´°³±µ°°³²±°®²³°²¯­³¬°³´¯±­°®²°°°°°²¯°®°¯°¯²²²°±®¯¯²±°°³°³­²®¯¯¬¬¬³²°°°¬°­±²¯®®°°®®®¬®­¬¯®­¬®®«­®­¬¬¬¯¬®¬°ª¬¬®«®«¯®«­¬¬«®¬­°«¬¬®ª¬««®©­¬ª¬­®®¬©­«­«¬«©ª©¬ª¨¬«©ª©©«¬«©«ª«©ª«ª«¬¤§ª©ª©§§¦©§«¨¨§§¨¥§­©ª¥§£¦§ªª¦§£©§ª©§         ¢¡  ¢¡   ¡ ¡     ¡¡¡ ¢ ¢ ¢ £¤¢£¢¤£¢££¥£¤¡¤¡£¤¤¥¢¢¥¨¤¥§ ¤ £¨¦ ¡¢¥§£¤¤£¦ ££¤§¦£¥¨¤¦¤¥¦©¤¦¦¤§¥¥¦¥©¨§¦¦¥¤¥¥¢¦¡§¦¦¥ª§§¤©¨¦§¬¤§§§¦¨¦¦¥«ª¨¨¤§¨¦§¦ª©¨¦ª§©ª§©«¦«ª¤§ª«©¨«¨«¬©©©ª«©¬¬ªª©©¬¨¨¬ª¬¬¨ª¬¬§¬¨§««¨¬«¨¬§«©ª«¬¬©«¬¬¬¬¬­©¬®­«¬¬¬¬¬«¬ª¬¬¬«¬ª®¯¬­¬©¬¯¬¬­¯­¬­¬¯¬®¬¯­«ª¯ª«¥t`i]~_Mn[MfWKdQK_OD]OI[QK[O?SWK[[UfzÍÒ¢§Ø³²ñ¼·õ´ÁØ½»x§kd~f~nkkrtx¥³·½Æ Ê¥Ô ¨Þ¥°Þ¨´æ¨¶è«¹î¯¾ñµÃô·Ãõ·Æø»Èú»Éú¼Êú¿ÍúÆÑúÁÑúÂÒúÅÔúÈÖúÊÙúÊÕúÊÛúÊÜúÎÜúÌßúÎÞúÏäúÒáúÒãúÓàúÑãúÒäúÑçúÒãúÒçúÖçúÙçúÚëúÛëúâìúßîúÜòúàïúàïúãòúãôúãôúèõúåôúáóúåõúáóúáòúßóúßñúÝðúÝìúÖëúÎéúÇäúÁâúÀÞú±Ù÷¯Ïï®Éñ±Æï­Äñ¨¾ë©¾è¦»ä¤¶á¡·ß³Ý¡®à£²ç¥³ë®³ð°¹òµ¾ö¹Áú½Èú¸Ìú»Éú¹Éø·Éú¶Êú¶Êö³Æò¯Âí­Àë©¿ä£¸Ú³Ò¬Å¢¿¶´¹»¿ÆÊÎ Ó¤Ò¨Ð§Ï§Ë¥Æ§Ï¨åª®ô³»úºÆúÂÎúÍÖúÌÞúÔáúÖçúÜçúÛëúÙîúÝêúÙìúÜîú×ìúÖíúÙìúÖëúÖëúÎçúÈçúÆãúÃâúÆãúÂàúÅÜúÃÜúÂÜúÄØúÂØúÅÕúÅ×úÂÕú¿Óú½Òú»Îø¸Íø·Éö·Êõ³Çò³Äð²Âë°Áë¬¾è¯¾æ¬»ä©ºä¨·â§·Û¥µÜ¤°Ø³Ö ¬Ñ¬Ð­Ì§Æ©Á¤½¶¯¥{|tunqdgu{_ot[toUnnWinYoiUkk]inYllUkdWfbQfgSilbd{goinixduqYo]QdOK`QI]SDWSMYOO[QIUQK`MFSSBWUFWMKWSB[UIYSI]MDYUKWOI[OFUSKWQK[UDYOD[QISQI]UMYSKW_Odikl¤¨°«²®±¬±³¶®±²³­¶´·£´´³³³····´¶¶ ³· µ¸ ¶· µ»¶¹£¶º£¶¸ »·º¼¢¶»£¹·µ»£·¸´¹ ¶º¢·¹£º»¤»½»º¥¹º ¹»¦º»¥º½¤¸¹¡µ»¢´·£»»¢·¹¤·¹¢¹¹ º¹¢¶¹ µº§·½£¶»¥¹¹¸º¶»£º¶ ¹º£µÀ¡µº·º¶¹¢´»¢·¼¢·º¤¶»¡·»¢·¼¤¹·¹»¢·»ª¶¸£¸· ¸» ··¤´¹¸»¥´·¡¸º¢¹º¢¶º¢··¢·»·º¤¶¶µº¢´¹¢··£¹¶´·¢µ¶´¸ ¶·¥µ·¥·¹·´£²º¡·´³· µµ¢´µ¡µ·³¶¡³¶··³¶³¸µ¸³³µ·³´ ¶· ²µ µ¸³¶¢²µ¡´¶³µ²¶ ³²¶¸¢³µ³µ³´¡³³²³µ´³·²³°³¡´µ±±¡³¸µµ³¶³´ µµ¯´³µ´´³³²±³¶®³³±°³°®²µ°°±²°³³³°³´°³´­³±¯²®­³±±²³²±¯±°³¯¯³³®°¯°®±¯°®°­±­¯°°¬¯ ®±°²¯®­²¯­­®¬­®±±¯­­¬­¬³¯¬¯¯­®¬¬­­ª¯°²¬°¬¬®¬®¬¨¯©¯¬¬®°««¬¯­­ª|||||~||~~~{~z~¡ £¡¡  ¢   ¡ ¡ ¡ ¤ £¡¡¥£ £¨£ ¥¡ £¢¡¢¡££££¤¡ ¢§¢¦¢¤¢¢¢§¢£¡£¡¥¢¨¦££ª££¤©§§¤¦¥¥¡££¤§¦¢ª¤¤¥¦¤©¤¦¤¤£§¤§£¥¢¢£©¥¦¦«¤¦¦§¥§¦¥£¦©¦£§§§¦¥¢©§«§¨¥§¥¬©§¥«¨¥§¨§©¦ª©¨§««¬¨§¨©¨ª¦«§¥¡£| nz`iK|YIlQDfS=_K5[K:YF:SD=MF3QF5QMFYnql¶Ð¡¡Üª­å²¶ñ®ºá·Áx¬¢lb|Yw_`|ig{klu§±·¾Ã¡Ë§Ö©Ý ®ß¢²ã¨´é¥·ë­·ð¯¾ò²¾ô³Äö³Äú¸Èú·ËúºÍú½Îú¾Îú¿ÐúÃÒúÁÓúÃ×úÆÕúÄÖúÃÖúÈØúÇØúÈÜúÊÝúÈßúÌÝúÊÞúÊÝúÊàúÐáúÌáúÎäúÒåúÕæúÖæúÙéúÖíúÙïúÙìúÚíúÛñúÝïúÝîúáñúÛòúßïúÝñúÝïúØïú×ðúÔíúÓëúÏèúÊäúÃâú¾Ùú»Ýú·Öú¯Ðñ§Èê¥Ãè£¿çºæ ¸á¸Ý³Ú­Ð©Ð£É ÌÓ¡Ù¥ß¤ªç£±è§¶ó¯¸ò¯¾ð©¿ó©¼ñ©¼î§½íª»í¦¼ç£·â·à³Ó®Ì¦À·x©o¢nkq|t¬³½ÂÈÊÇÇÃ¥ÂÁ ×¥ó«´ù±¾ú·Æú¿ÏúÇÖúËÜúÍßúÔâúÓèúÓçúÑèúÔçúÒæúÒèúÔêúÓæúÏæúÎçúËáúÄâúÄãúÇàúÁÝúÂÝúÃÚú¿Úúº×ú»Õú¿Õú»Óú¾Ñú¼Ïú¼ÍúµÍú¸Êõ³Æó³Äð®Áï¬Ãí«¾ê§½ä¦»â§·â§¶ä§³á¡µß¡¶Ý ²Ú³Ù²Ó®Õ®ÎªÌ£È£Á¢¿²±¬x¡qnnib|d|]wzYtrOinQkfIgdI`iKbfKddM`bK``Df]F`]M`gDdfQfo]b{fn`o~QldFiS:_I=UI5OD5UO:SD5SI5UK:KI5UD8QK5SI5MD:QF5MI:UF8MF=OK8QF8QI8SI8QI8QD8QI8WD5OF?YQBUSIYngo|¡¨¥©¬¬§¬­«¬®¬¬­­®®¬°¬°®³¬±­±°¯±³²´²²³³°±®³¯³²³µ³´´³³®³´³´µ²·¶·³´ ¶³µ¶´·³´·µ³¹··µ´²³³·´³µ³µ´³·³´²´°³³³´·±²³µ³µµ³´µ²¶²´µµ²·³²±µ°³³²´³³·³³³µµ´³¶·³±¶³µ²´²¶²µ²´¶µ²´³³³¶´µ²³µµ°³±³±°²´³³³³°µ±¯±³¯³²²±±®³²²³²²³²²°²²°®¯¯¬±±¬±³¯°®°²±°°­­¯°µ²¯²±°«°°°³²°¬¯°²®³°¯²¯¯²¯°°®®®¯¯²¯°®­¬­°±³®«­®®®¬­®®¬®¬«¬®®¬¯¬¬®®ª©¬­­¬°­«¬¬±­¬¬­¬­¯°«ª¬¬¨«¬««¬­¬­¬¬­«­­­¬«±¯­¬ª­«©ª«¬©ª®®«­««¥¬©ª«¨¥©¨ª¨¨©¨©¬¥¥©©¥©¬ª§ª§§§¨§§ª«¨§¬ª¦«£©¬ª¨ª£§¨¦©¡   ¡  ¡¡¢ ¤ ¤ ¢¤    ¡¡¡ ¢¤¡¡¡¡¡¡£¢¡¤¢¥¢¥¢¡¢¤£¥¢§£¡¢¢¢¥¡¤¦¢¢¤©£¤¡¡¦ ¥¥ ¦¢¤¢¥¢¤¤¢¤¥£¡¨§¤§¦¨¨¥¥¥¥§¥§¤¨¢¨§¤¤§§¦©¦¨¥¥¥¦¥§¨§§ ¥«¤£¯§¦¦¥¡¨¥§ª§¦¨¦¥¬§©«¥ª©§¨¨¨«©§¨¦¦©©¦¨ª©§«©«¬¨¨¬©®¨¬ª¬¬¬¨¬®«©¬¨ª¬ª©­©¨«¬­«ª©«¨ª«¨ª¬¬¬ª­¬¬¬®¬©¬­«¬¬«¬¬¬ª¬¬¬¬«¬¬®­¬®®¬¬°¬¬¬¬¬¬°«¬®­®¬­¬©­±¬¬¨©¬¢¤zoblU|[OobQn[IiWFbUIYQFWWIUQKYWM]iqr¬Ö¬è°­è³¼ð³»ë¢¾Ð·¼¦­tkklt¢r¡zu¤¬´¼ÅÆ¢Ï§Ø ­ß¦®ç§µé¬ºï®½í°¿ó·Áô¸Æ÷¶Èø»Æú¿ÌúÀÌúÁÐúÃÓúÃÕúÆÖúÇÔúÇ×úÆØúÆÙúÇÙúÉÚúÌàúÌßúÌÜúËáúÎßúÍàúÍáúÍãúÐâúÕãúÕçúÖçúÙèúÛêúÚíúÝïúÜïúÜïúâñúâòúâôúäôúåóúáôúâõúäôúáóúäóúáòúÚñú×îúÒïúÍèúÅäúÅáú¿Ûú¾Ûú·×ú³Õò¬Êì¬Ãèª¿è¤»æ§·à³Û¯ÒªÌ¢¿µ»ÄÎØ¥Þ¡«æ§°ê«´í¬·ï¨»î«·ì§¼ì¤ºè«·è¦·ä¢³ß°Õ¬Ë§Á¹§xkftfwqit~nxx¥~»¿ÅÈÈ¢ÆÃ¡Á Á¢Õ£¥ó°¶ù³Áú¸Ìú½ÐúÉÓúÎÝúÓãúÙæúÙêúÚêúÜíúÒéúØìúØìú×íúÙéúÖêúÑìúÒìúÐçúÎèúÎçúÌâúÊáúÇÝúÅÜúÃÛúÆ×úÃÖúÁ×úÃ×úÃÓú¾Ðú½Ðú»ÎúºÌõ¶Èó³Èô±Çð²Áï¯Áë¬¿ç®¿ç«»å¬»ã©¶ã¨¹á§³à§³Þ¨µÚ¥´ÖµÒ®Ó¦ÌªÇ¦Ä ¼´¬¢wuwrnlk||f~~]oq]onWlnYikUiiWnk]doYiiSlfSfk]inUio_iugnlrlqbonSqUKiQK[MK[QF[YQSUK_SFWWQYUI]OIYSFSQDWQI]WIYSKUSI[SISUD[QBYQIUSK[UD]QIUUF`SKYWO[_O_b_kw£¨¥©¦­«­®°©¯®²²°±³±´®³°µ³³³³¯¶³³¶µ³·´·µ·³´¡´¼ µ· ´»¡¹¸ ²·´»¡·¸·³º» ·¸ ·¹¢¶¹¥´¹£»º¡´¹µ¶£··¡´¾£·º¤¹» ¹º¢¶»£·»£·º¶¼¤··¢·¹¥·» ·º µ»¡¹º µ»¢¸º »»¢··¥¶¹¤·¹¶¸¡¹¹»»¢·»£´»£ºº ¶º¦¸¹ ³»£·»¤¶¸·»¢·½¥¶· ·¹¡¹»¤³¹¥¹º¢·¸¤´»¢·¹µ»¡¸¹¢³»¤·»·¸¡´¸ ¸»£¶¶¢¶· µ·µ¶¢¶···¤µ¹¡³µ£·»¢³·¢µ¹¡µ·¡µ¸ µµ³· ·· ¶¸·´·º£´´¶· ³¶µ´¶· ³¸±µ µ³³·³µ¡³³±´ ´º ³¶¶´²· ³³²´·¶±µ³µ±¸²³ ±µ³µ³µµ±¯µ³¶³³³µ±³®³·µ²´³¯³³±¶¤³¯±±±µ¡­³ ³´®² °³±³³³±³³´±µ­³­³±³³³±®¯³®³³³°³°³¯´³²®³®±³²°³°­²¯®­¯±¯­±°­²®°¬±®°°°¯¯ª®¬¬¬°ª­­¬¬¬­®±®¬®ª­¬¬¯®«°¬®­¬«°©±¬¬­°¬®¬¬¬|{|||~z   ~  ¡  £¡£ ¡¡  £¡¦¢¡¤ ¤¡¤¢¡¢ ¡¢ ¢¢¤¡£¡§ £¡£¢¡¡¥¡££¥¢¡¡£¡£¦¡£¥¤ ¦¢£ ¦¢¤£¥£§ ©¤¤£¦¢¨§¥£££¡¡¤¥¡©¥¨¦¦¢¨§§¦¦¢¨¢§§§¤§©££¤§¦¨¦¨¢«£§§§¥¤¥¨¦ª¦¥£ª¦©¨«§¨¥ª¦©¤©¦§ª©§ª§©¦©ª«£¬¦¬¥¬¦©¥¦¥ª|¡tq]dK{YIg[BgU=`M=_I5]D8QK8WF5YF:UYUb~wÒ¨æª«Ûª¸å®·ð§Áá¹Ã­µt¢§dbdngfln§|®²»ÁÊ¤Ò§Ø©Ý¡³â¢´æ©·ë¨¹ñ±¾ó²Áò±Ãô³Æ÷¶Éú¾Íú¹ÌúºÌú»Ïú¹Îú¿Ðú¿Òú¿ÔúÁÒúÁÔúÃÖúÃÖúÃØúÆÚúÆØúÆÝúÈÝúÇÜúÊÝúÇÜúÊâúÐâúÒäúÕåú×çúÖêúÖëúÛìúÙîúÙðúÝïúÝïúßôúÛòúÞñúÛñúÙñúÛñúßïúÙêúÑíúÌèúÇãúÁáú½ÜúºÜú¸Õú·Óú°Ó÷ªËê£Æã¡¿â¶ÛµÕ°Ö©Ë¤»zªqk~f~kuª¿ÊÐ£Ú¦Û«à°Û®ß®Þ®Ø±Ø¬Ó«Î¢Ã¢¹~«qgY`Mz_In`FkbDnbMglYozgrw~±½ÂÀ¿º|¹w·Ç êª©õ®»ú²Èú¼ËúÁÓúÃØúÉÛúÏßúÓâúÒáúÒæúÐêúÒåúÑæúÓæúÒæúÔæúÐèúÎæúÏçúÌãúÆâúÈàúÃÞúÆÜúÃÙú¿Ùú¾ÖúÄÖú»Óú»ÓúºÐúºÎúµËø²Êõ­Åó¯ÆðªÃî«Àæ£¾é¥¾ã§½â£·â¤¶ß¥´à¡¶Ü²Ú ³Ù·Ù°Ø®Ò¬Ò­Ì¨Æ§¾»·«w£uogkfY{`~x[wwWuoQnkMlfIg]FffI`]Ff[F_bK`fFg[FddK``OdoQdqUiw[iu[qwUggDfM5`K?YD8UF=UMBSQBYM8[I:SI?[F5YK8QD=QK=UI8QK:SD8UD5WF?SD:QI:SK5UI5QD:WI8QM=SK?WUIb_]f{|¡£ª¥¥§§§­©©¬®¬«©­«®­¬«®¬«­®®­°®°°°°¯®±´²±²²²¯´³³³³°³³°³´µ´¶µ³³³³·²²´´³µ³¶·³µ´³¶¶²·³±¸µ²³³²²²²²´´°³³´´³¶³··²´·³¶·¶²³³µ³²µµ²±µ·´³µµ³³´·´³µ¶µ³²µ¶²³³³³²µµ²³´³³³·³µ³·³³²´³³²°´³³³±³²³´±²µ´¶³³²µ°±´²°³²°±³°±²¯³³±³³®³°°°±°µ°±°²­°²¬²±­«°®³°¯³®°¯­³°²°¬²®®²±²°¯³¬¬³²®´®°°¬¯¯®±²¯±®­±°°¬¯«¯­®ª°¬°¯¬²«®®©¯«¬«­¬°¬«¯¬­¬¬¬­«ªª¬¬¬¯¬¬«®«¬«¬¬«®¬¯­¬¬¬«¬«­¬¬®¬®«©°«©¬¬®«ªª®©©©ª§®«§¥¨¦¬§¨©§©««ª©¨¦©ª¨§©©ª§ª¥¨ª§¤¦¦ª«£§¨§ª«§¨ª¢¨¨¦§ª¡ ¡  ¡¡   ¡¢ ¢  ¡¢  £  ¢¢¡  ¡¢¤¡¤ ¡£ ¤£¥¥¦¢¢¤¢£ £¢¥£¡ £¡¥¦¢¢¢¦£¢¥ ¤¡¡¢£¤££¥£¤¤¥¡¥¦¢§¥¢¢¥§¥¤¦¦©¤¤¥ ¥¦¥¦¥¤¡¨¦£¥©¦¨§¨¤©¤§£¥ª¤¥©¨¥¨¥¥¦¨¨©§¨¨¨©ª©¦©¦«§ª«©¦¨«¨¨©¦«¦§¨¦¨§©©¬§ª©«¬©©¬¨¬«ª«¬¨©©ª¨¬ª«¬ª¨ª¬¬¬¬©ª­©ª©«©¬©¬ª«¬¬¬¬«©©«¬¯¬¬§¬«¬¨¬®¬¬¬¬¯¬«­®ª«¬¬­°°¯¬®¯®­°¬­¬¬®®¬®®¬®®­¬¬­®¬¥¨£uwbkWzkWr`Ul[KfUK`UF[WF[QF[YD[]]d~wÒ¯î±¬áª½ìµ»ö·¿ô¤ÄØ»Ð­¼|¢¡ttt o¥r¡x¢~«³¹¿ÃÈ¤Õ¨Þ£¬ã¤±å©¶ê¬¸ï³Àð·ÃöºÄ÷»Èú¼Çú¼Ìú¾ÌúÁÎúÁÑú¾ÒúÁÏúÅÐúÆÕúÄÕúÇØúÆÕúÆ×úÆØúÆØúÆßúÍÛúËÞúËÞúÌàúÏÞúÌàúÔäúÕçúÜêúÖíúßìúÞîúàòúæðúäóúáòúéòúåôúçôúàôúàôúàòúãñúßðúØïúØìúÔëúÊéúÈçúÃÞú¾ßú¾Þú¾Úú½Ùú¸Õú¯Ñí¦Êä¥Âà¹Û´×¬Ï¢¿xofQx[t[z{kz¾ÅÐ Ó¤Ú¬Ö¬Ú©Õ¬Ò©Ò©Í¥Â¡º°zkbu[{lSxoOokQoqSuuQnzS{d{q­¼ÄÂÀÀ½|¸Æèª¬ö³»ú¼ÆúÃÎúÆ×úÅÚúÈÞúÍâúÎàúÔäúÖèúÒéúÑèúÓèúÔêúØèú×èúÕëúÓêúÒèúÐåúÐäúÐáúÌäúËÝúÊÜúÊÞúÈÞúÈÙúÃÕúÁÓúÄÒú¿Ðú»Ðú»É÷´Êô³Èó®Âð¯Áì­Áë¨¾è©¾æ¬¼ä«¹å«·å¨¸ä«·â¬µà¨¹à¨´à§³Ù¥±Ô ¯Ð«Î«Ä¥Á¡·®¨~wrowll|g|`{{`ox[ooUniWknWfkQilUikQdoUqkUktSin[nudi|`izbo{bqu]lkSk[FiYM]UI[UK]]O[_M_WKdYMYWK[UB]WMYUKYODWWDYYKYSDYUIUUFUQKYUI[UMSOD[SF[YFYWF[]Mbd_k|ou¤¦£¨¥¬©«©®¬¯©®¯±¯°«¯²µ°³¯³´¯³³°¶³²¯¶±³´·±¶³·´´·¸¶·¶¸·· ·³¡µ´¡µ»¢´»¶·¶¸¸¸·¹µ¹£·¹¡´»¤¶·¥µ»¢´¹¢··¤¶» ·¸µ¶·¼¶º¡³·³¸¡¶¹¢µ»¥·»¡µ·¥·» ·º ºº´·£¹¹¤¸º£·¹¡¸·¡·¾¢º¹¢¸º¤µ¹¡·»ºº¡·¸¸¸£··¢·¹ ´¹¢·¹¢¸º¤·¹·¶ ¶¸§´»¢µ¹ ¸º¤¶¹¡¹¹¤·»¦´¹·º¡µ¸¤·¹¡¶¶¢³¸¡¶»¢··¢¶·¡³·¢·º¤µ¹·¹·³¢·¹¢³¸ ²´µ·³¶¢µ· µ·£··¶· µ¹ ¶±´¸¡³¶·¶²·°¶¢·º¶µ²µ¡³´³·¢·´¡µµµ·¦³¶³·³³¢µ´ ³¶ µ³³¶ ±´´µ ³·¯´µ´³´²µ°³³¶²µ³³³µ³µ³±±¶³±°´±³±²±³±²°¶±²²¶¯³¯³±°±µ®°¯³±³¡³³¯³²³²´±±®³ ±²®³¯±¡¬´°²¯²°±®°­±²²­¯³¯³³­¬®°®­¯­¯®­¯¬¬­¯¬±««­¯­±®®­«¬®¬®ª®«®¬­¬¯¬¯¬±®¬¬¯¬¯¬­®z|z{|{|~~~|~~| ¡|¡ ¡¢¡ ¡¡£  ¤¡£¤£ £¤¥¡¢¡ £¨¡¢¤¢ £¦ ¦ ¤¡¤ ¥¡¡¦£¤¡¢¦¡¢¢§¡¤¢££¡§££¡¨ ¥¥§¦¡¦¡¦¡©¤¥£¦£«¢¤¤£¡¦£©¢¡¢©£©¤§£©£¥§¦¤« «£§£©£©£ª£ª¢«£§£§£§¦¬£¬¥«¥©§¨¤§¤©§¨©«¨«§©§ª¨¬¨¬©ª¨¬¦ª¨ª¤«¦§§§¦«§§§ª¥¨ xoxSfI{YKo_IkU=_I=]D:]D5OF=WD0WSF]lqqÇ¥è©¦àª»ç¯ºù¶Áø¥ÄÛ¼Ï°Äx§¯q¡ kkkk rt©|¬±·¿Ã É¥Ó§Ý±á¡´æ§·ë«¼í±¿ð³Àõ¸Ãõ³Æø»ÉúºÉú·Ìú¹ÎúºÎúºÐú½Ñú¾Îú¼Ðú¹Ôú¾ÒúÀÐú¾ÕúÀÕúÁØúÂÖúÄÚúÄÝúÄÛúÅÛúÊßúÈßúÎàúÑáúÒåúÛæúÛêúÜìúÝïúáñúÝïúßñúáðúÚïúÙïúØìúØïúÕîúÕíúÎêúÊèúÆäúÁäú¾Ýú¼ØúºØúºÚúº×ú¿Öú·Öú¨ÓêÆÛ½Ó·Í®Æ¦½r¡¦dSMM{F~tF|tK~|Yku§z»ÂÈ ÆÊ¢Ç¡Ä½»~²q£ldzUuK|qKtoBtt?rqFquDuzFoKz[k«tµ|»|»z·z·u²n­{¾á¤©ó±¹ú¸Æú¾ÎúÃÖúÃÙúÁÝúÅÛúÊàúÊàúÉâúÌåúÎäúÍãúÌåúÏäúÎäúÒäúÌãúËâúÎáúÈáúÊàúÈàúÇàúÄÚúÃØúÁØú¿ØúÁÖú¸Ôú·Íú·Íú´Î÷°Èð¯Èò§¿ïªÁé«¼ç©»ä¡»â£ºà¡¸à¤¶à¦µâ§´à¢³Û¤³Ü£±ÙµÖ²Ñ¬Ó°Ì©Ã¦Á¡¸°|«ulifggb~~[wwQtnSnlOndFbbIidI`_D`bFg]DfdI`bIdfOdnQklQltUk|UknQtlOi`BdD5fF8[S?SKB[UB[SF]SB_D?[K:SF8OD5YI8SI:WB5YF:QF5QB8UF5SI8UD0SF5QD?YF:UK8SO=]O=Y]Ui~tu¡¡££¤£¦§§¨¥©ª¦««¨¬­©­¨¬«©¬­®«¯«¬®®¯°°­±°­°­­­±²°±­°¯±²°²²¯°±°²²±°±¯²±³´´³³°´²³³µ³³µ³²´³²³³³³¯°³±¶±´±³³´±´³³´³³²´·´´²µ²µ³²´°µ³³²°´´µ¶·µ´µ³³²³µ¶³³´¯µ±³³µ³µ·³³³³¶³³³²³³³¶¶·³·³¯²³¯±´²®´¶´²³³³²µ°³³±²²°²²±±²±²±®´°²³°²®²°²¯°±°®°°´³®®²­°±²²¯³±³®®²¯±®®°°®°®°°¯®²±­¯²°±­®²°¯µ®­³±°®¬±®¯±¯®®­¬¬°­¬­¬¬««¯«®¬®­®ª°¨®¬°¬¬«°«®¯­ª®­®¬ª¯¬¬¯­­¨®¬­ª°®¬®¬°¯¬­©¬«¬­«ª¬©ª©§¬©¬¦©¬ª«©ªª§«­§¬¤­©©¨««ª©ª©¬©ª§«©«§©¨©§§¦ª©«¤ª§«¦«§ª¨¨¬¥§©~ £  ¡¡    ¡   ¡¤£¡¢¡¡ ¢ ¡ ¥  ¡¡¤  ¤ ¡£ ¢ ¤¡¤¡¡ ¤¡££¢£¢¢ ¡¥¤¤¥£¤¤ ¡¤¤£¢¢¤¤¡¤¥££ ¡¤¦¢¨¦©¨§¦¡¥¤¦¢©¥£¦ ¤§¥¤¢¡§¨¤£¦§§ª¢§¤£§¤¦§¥¨ª¦§¨¤¨©¦§ª¥¥¨¦©§§¨§¤¦¬§¦¨¨ª¨§§¨¨«ªª¨¨¦¨ª§¬¦§«¦©©§¨¨¬§¬¬¨¬©§¨ª«§¨©©ª¬¨©ª«««®¨©®««¬§ª¬¨¬ªª¬­ª­­©¬¬¬­«¬««¬¬­®¬©©©­«­°®­«­¬©¬¬¬¬¯¬®¯¬®¬«­°¬¯¯¬®­­®«¬¬®¬©¨¨¢|fkUi]xlUo`QgYM_QF_OFWSFYMI[]Q`qrkÆ¨îµ¨ë³»í·Àú¿Âú³Æì¢Åà¸Î®È©¹{²xªr£w¢z¢©¯·»ÁÇ¡Ð¨Ø ¬Ý¤®ä¨µë®·ð®¼ñ´¾õ¹Áö¼Æú»Êú¿Æú¿ÍúÁÌú½Ïú¾Òú»ÒúÃÓúÃÐúÁÕúÃÒúÅÕúÆØúÅÖúÆÕúÈÛúÇÙúÊÜúÊÜúÊßúÌáúÐâúËãúÎãúÓäúÙéúÛêúãìúãñúæñúæðúâôúãòúäòúßóúÛðúÜíúØíú×ëúÖìúÔêúÉæúÈãúÆâú¾àúÁÜúÁÝúÅÙúÅÝúÃÜú»Ûú¯Öô£ÍÛÁÕ»Ì°Ä¨¹t¢¬k ]b b£b¡f¥dªn­n­w©~¯¼ÀÅÃÁ¾º·«wii``{]xY|]{bx]f§n´u¾x¾¾Ã½½´t®q¶Ê¢éª¬ö¶¹ú¿ÈúÃÐúÈÔúÊÛúËÝúÍÜúÌâúÌãúÍãúÐåúÒçúÒåúÔçúÔèúÕèúÓçúÓèúÐæúÒçúÍãúÎâúÎâúÌßúÊàúÊÝúÄÝúÆÚúÃÖú¾Øú¾Óú¼ÐúºÍú´Ìö³Éõ°Äò°Âð±Ãí«Áçª¼á§ºæ§¹ãª·ç­·å¬¸ä­¹ã©ºã©·Þ§·ßª¶Ü¥²Ô±Î­Ì¦Æ¥»·­§~ xtwuriix~g{w`ux_ooWklYoiSfkQkkQinUgt[ilYkrbgio~bu|`wbow_trWlfQdWIfUD[[OWYO]`O_bUY[KbOI]UF]SFUSDUWKWWF]OIYUIWQIYSB][BWMK]WD]QB]OQYQF[WMY[M__Qktqt¤¤¢¡©§©£§¨©¥¬ª«©ª«®«®¬¯±±­°®®¬°°³­³­³°²°³³³°´ ±³±³²·¡³·±³±¶ ³µ²µ³·³´¯³³¶³¶µ·³µ ´·¢³···³µ¡³¸£¶¹¶¸¢³¶µ¹¶µ¥´¸¡·¶¶º¢µº¡¶¹ µ·¡´·¤µ» µ¸ µ¸¡·¶ ··¡´·£´·¥³¼·º¢µ¶ µ¸¡¹¹¤··¦¸º¶·¡»¹¢·¹¢¸»¢¶º¢·¸¢·¸£³·¢´»¡¶»£¶¹£·¶·¹¡µ¶ ·» ¹¶ ³¹ ¶·³¸¢³´³µ¸·³µ¢µ¹¶¹¡´»¡··¡¸¸³·¡³¶ ¶·¢¶·³·¢µ·µ¹²¹µµ ·¶ ·µ²µ´º ·¶ ³´³´³¹³¶¡´·µ¹¤´¶³¹¶¹²µ´¶ ±µ³´±¶¡³´¢³¶³¶³µ³´µµ³² ³µ³µ´µ °³´¯±´±µ³³³´³µ¯´³µ±´¯²³¯³³±±°²¯²¯²³³±²­´±®¯µ²³®³²³®°®±°³¯¯®®®¯³µ¯³°³²°¯²¯±°¯°±®®±¯¬³¯±¯®®°¬¯­°¬²®¬®®®®­¬¬¯®±ª­­­¬­«¬­®©±±­¬¬¬®­®­¬§®¬¬®®¯­¬¬«||{|~{|x~|¡| ~|¡¢ ¡~¡¢¡¢¢ ¡£¡¡ ¢ ¡£¢¡£¡£ ¤¡ ¥¥£¡  ¥£  ¥£¥¢¥¦ £¤¢¤¡¢¥¢£¢¤¡¦¥¢¢¦¨¡§¤¢ ©¡¦¦¢§£¦£¥¢¨¡§©£¥ ¥¡¡ § §£§¤¤¡ª¤ª£¦£ª¥§£¥¢§«£§¤©£§¥©¢¨§©¡§¢§¥©¦§¤§¢§£©£©¥¨¨§¥¨ª«¦«¦¬¥¬£«¦©¥«¦ª©¨¦«§«¨¬§¬¥«§§¦« §xq_fMYKqYFnU=bM:_D:[?5QI5SI8YQ=Y]bg³å°¢ë«»ã±¿ù»Áú´ÈîÀÛ»Î±Ïªºu µr¦nkiu¡t§{¯~´¼ÂÆ¦Î¨Ø®Û¡°á£³é¬¼î±¿ï²Âõ³Âö·Æø·Éù»Êú»Îú»ÌúºÌúºÏúºÐú½Ðú½Ñú¾Óú»ÒúÀÐúÁÓúÁÔúÀÔúÀÖúÆÖúÅÙúÄÙúÅßúÆÝúÅÝúÅÝúÌßúÐáúØåúÛéúÙëúÚíúÚïúÜíúÛíúÜîúÔíúÑêúÒëúÑèúÌçúÈãúÆâúÂäúÁÜú½ßúºÙú½Öú»Øú¿ÙúÁÜúÀÛú¹ÙúªÓöÍßÃÎ³ÄxªÁt§¸k¡¯`°d·d¾lÁtÂwÅr Ã{½w¾r·x°z®¶~µz¶x¶{¯q§n¡kdYY|[|WzYzY~[¡_«i±kºx¿~Å|ÃzÃx»r´r²o¨_§g´{Ï ç¦²ò¯¸ú·Æú¾ÌúÃÔúÂÖúÄÚúÇÛúÅØúÅáúÆÝúÈáúËäúÌáúÏãúÑçúÌãúËâúÇãúÊßúÊàúÈâúÅÜúÄÝúÈÜúÇÛúÂÛúÀØú¿Ùú½Óú»Òú¸Ðú·Ìú²Ìõ®Êñ­Æñ¯Ãì«Åç¦½ä¤»å¢»Ý¢µß¥·Þ¤³á¦·â§¸ß£¶Û¤´Þ£¶Ú²Ø³Ó®Ð«Ê§Ä¤º¢µ¬~¥tqonff|bYzzUwrWuoKrlMngOifIkdIgdK``FdbDdkQfnOgl]g_k_tz]ozYnoOnkKk]D`S:]D:UI=YMDSOB]SB`OBWK:`M:WF8QD3UB:UI=OI8SD=SI5SD5UF5SI:UK=SF5WI:UI8UI8WOBYYSfxlz ¡¡£¦ £ £¥¤¤§¢¨ª¤§ª©­®¨¨©©­ª­ª¬ª¬«ª°¬¨®­®®¬«®°­«°®¯¬¯¯¬°®©®¯¬®°®°²¬²¯±³²¯³®±°®®³³²²°¯°²²±³²¯²³³³°³²²µ²°´³´°³µµ³°°²²´±³²µ²³³³²±±³µ³´²¶²³´µ±¶´³µ²´´²³µ²³·µ³°´³´³µ²²³³³²³³°³«³²¯³µ°´³²±²®±°³°´²µ±±´µ¯³´°¯²­´¯²²²°³°³°°²´°³®®¬°­µ°®°²³³°°±³°±¬®²²°²¯²¬¯°²®±°±³²­´°²¯®®±³¯±®¯°®®¬®¯¬®°°¬­±¯¯«­¬®®­®®«¬¬¬¯®«¬®­°¬®¬«¬®¬¬¬®¯©«­®¬«©­­«©®«©ª¬«¬«ª¬¬®®­¬««¬«¬¬­ª¨««««¬¦«§««©¬®¨¬ªª¬®¦«§§©§¦ªª¬§©¦©¦©§¬£©©©§¦¦§§©«©¥©¬¬©¨¦¨¥¬©ª ¢  ¢  ¡¢¡¡  ¤¤ ¡£¡£  ¥¡¢£   ¢£ ¢¡ ¡¢ £ ¤¡¤¢¢¤¦£¡¥ §£¤¥¤¡¥ ¢¡¤¡¦¦¡¥¤¡¦¤¢¥¢¥¡¡§§££¥§¥¦¢§¤¥¡¦¤§¢¤¤©¢ ¤¨§§¥¨¤¦£¨¥§¥¦¤§¤§¥¦¤¦¦¥¦§¦§¦§¤ª¥§¦¨¦§¥¬§§©¨¦ª¨¨£¦©¬§«§¢¥«¨©¦©¨¬¨¬­©©¬§¬§¨§«©«¥¨§¬¨ª¨««©¦¬¨®§¬¤««ª¨©§­¬¬¬¬©®¦¬¬¬ª®«ª©­¨­¬¯­ª¯¯¨®¬©©¬«­®«¨­ª°¬¬¬¬®¬¬¬¬¬«®«¬®¯¬®«¬¬¬­¯®®¬¬®­¯®±­ª¬§ª¤|oxffWzdOq`Qn[KdSK`SF]SK]SI][Kbgbi©å·¡ô³ºí³Ãô»Âú»Åö¬Çé£ÀÝ·Ø¶Î¬Ã~©³z ¦q¡r£«­·»ÀÆ Ì¥Ð§Ø£¬Ý§´é©·ì³½ðµÂô¹Æö»Éú½ÊúÀËú¿Íú¿ÐúÁÑúÂÎúÂÒúÂÒúÃÓú¾ÓúÁÕúÆÒúÆ×úÂÕúÅØúÊØúÈÜúÈÙúÉÜúÊÜúÈáúÌßúÌãúËäúÒäúÓæúØéúàíúâïúâñúâñúÛðúÜðú×ïúØïúÔíúÕíúÒèúÎçúÐåúËãúÉãúÆÝúÁÞúÀÝúÁÜúÈÜúÈàúÌßúÇâúÁÞú¸Ùú¬ÖðÊ×ÁÎ²É­Äx«Ç¥Ì§Ô©Ö¨Þ¬à±ß¯Õ¬Ò®Ñ¨È¨Ã£¼£¹³|³°{ªx¡uondgbil§q°t¾ÁÉ ÈË¤Í¦Ê¡È¡»z¸r±r¬k³xÊ¡â©ò­»ú¶Åú»ÉúÁÓúÃÕúÃØúÆÚúÈÜúÊÞúËàúÍãúÎåúÐæúÑäúÕæúÕéúÐãúÒâúÍäúÏâúÎàúÌäúÊßúÊâúÈàúÌàúÈÜúÉÛúÃÙúÃ×ú¿Öú¿Ôú¾Ðú»Îø·Íø¶Éõ³Æð°Éë¬Ãí«Àæ¨¾å«¿â«·ä°»ä¬ºã¬»ç¬»â¬¹àªµà©¸Ü¦µÚ¦µÓ¡°Î­È¨¿¤¹¡®¬¡w{uuoqn|b|~bw{`un[uw[ku[rnUqt[loYlq[q{fnxdqguowk{fx~bxzduxYrdOlWM_YKbWK[WO]_O`_O`_M[UKfYF`UK[O?`WIW[K[WK_WMWQF[QKYQI[SM]UK[QD`YFYUI_]Fb`Ufooo¢¤£¤§¨¥¥©§¦¥¨§«¨«ª§©®¨©­­®¬¬¯®°­®¬«²¯³²²±°¬³³°³°°³³¯´³±´±°´®³³³³¶°²¶³³¶³µ´³´·±·¶³³²²¹¢³´·µ³³ ´¸µ³´µ µ²´··¸¤³··¶µ·¤¶º·¹¶¶·º¤·µ ¶¹¶·¢¶ºµº¦µ¶ ·µ¡¶º¸¶ ····£¸·£¸¶¸·¤¶º£·¹¢ºº¡·¹¢»·¡¹·¶·¡º¸¸¸·»¤¶¸´¹ »¶·µ··µµ¡µ¸¡¶¶ ¶µ¡µ¶·´³·¢·¸£´¶·´´¸·¶··¡µ¸¢µ´´·¹¶³´¶¶´¸¡²·¶¶·µ¹´¢¶´¡·µ´³ ³¶·µ ³· ¶¶¸·²³¡µ´´¶¡³³µ°µ¶ ²· ´´´´¶¶³µ±¸µ³¡³´³³¢¶³´´¶´¯µ ´µ³³µ³±³³³³´´°³³²´¶® ±¯³±³²³¯­³³³³¯³³²´ µ²³²®³°°®¯±³®±¯¯°³°²±²³®²±­°°³²¯²®±°³°¯®²¯±°®¯®²¯®¯¯¯¯­¬­¬­­®±¬¬ª¯°¬­®¬¬¬¯¬¯­¨­°®¬¬®®¬¬¬«®®©­¬¬~|{~~|~~~~~ ¡£¡¡¡¡ ¡¡£  ¢¢£¥ ¤¡£¡¡¡¡ ¤ £  ¡ £££¦¢¤£§ ¥¢¤¢¤¥¢¥££§££¥¥ §¢¦¥©£©£§£¡¥¢¤¢©§¦£¤£§¤§¡§§¥©¤¥¤¦¤¨ ©¡©¥§¡©¤¦¥¥£ª¢©¤§£©£¦¦¥¤¬§«§¥§ª¤ª¦¤¦§£ª¥§©¨§¬¤¤¥§¨¬¤©¦«¤¨©¬ª¬¦«¥©¨¤¢§£zqwYfSx`IrUFiQ:]M?[D:YF=YM?UOBYQMd|Ü«ï­°è¨½é®½ð³»ô­Äé©¿è»Ù¸Ò«¿¨±oikr¤xª|­³»ÁÇË£Ð§Ö¬Ý¡³á©´ì²¾î³¼ó´Âô¸Â÷¼Èú»Ìú»Êú»ÌúºÌú¾Êú½Ïú»Îú½Ïú»Ïú¼Îú¿ÒúÃÓúÁÕúÀÒú¾ÕúÁ×úÃÙúÃÙúÆÜúÆÛúÊÝúÈßúËàúÔãúÕãúÙæúÛëúÜêúØêúØêúÖëúÕìúÒèúÌæúÊäúËãúÈáúÆáúÄÝúÃßú¾ÝúºÛú½ÙúÂÛúÆÜúÈÜúÇÞúÁÜúÁÙú´Ûú«Ó÷ÈåÄÎºÊ|³Æ|ªÉ§Î£Øªß¬ä«â²ß³Ú­Ó­Ë¦Ç Ã¤¹~ ´z°t¨q¦qidbb_`f¡f«q³t¼Å~¢ÈÊÊÅÁx »wµr²l¬d«d·lÀzØ§è¡²ñ«¼÷³Âú¸Èú·Èú¿ÐúÁÐúÁ×úÃÖúÆØúÄÜúÆÜúÇÛúÊàúÈàúËßúËâúÌàúÈÜúÉàúÇÛúÆÛúÅßúÅÙúÆÙúÈÙúÆÛúÁÚúÀ×úÁÔúÁÓú»Ðú·Òú·ÎöµÊõ°Æð®ÅïªÂë©Àé¦»å¦¸á¦¸à¥ºÜ¥µÛ¤·ß¦¶ß¦µß¥¶Ü¥µÛ¦³Û¢µÖ¡±Ó®Ñ«Ë«Ã¢¹®«x¥tqnkkk~bzz]uzUwu[qqYqnUkgQnkSggQggSfkU`gUgqWfz`dzdq_n~]rwSwqWnu]ktMnQ:gQ?]I?UK=YMDSMDUQIYUBUM?UM5YD:SI=SI5SI=UI=SK8WD:QD:UF8UF=UM=QD=YI8UIBYK?YWKdrok~£¡£¢£¢¢¢¤¥¡¤¢£¤§ª§¦§¥¥¦©§¥©©§¥©©©¥¨©«¨«ª¦««©¬ª­¬¬¬«­¬¬¬¬­¬­¯¬¬¬­®¬¬­®­«¯°®°°®°³²­¯­¯¬°®¯¬®¯­°®±±³³±´¯®²³°²²¯²³°²²´³³²¯³´³³°²´µ°µ±³´°µ³µ³²³³´³³³²¯³´³²²³³³°±´´³²³³±¯°®°­°³³³²±³³²¯³°²®°³±°¯±³°²³³²°¯°²²¯­¯³°³±¯³±¬³°°°¯°´­¯¯°°®¯´µ¯°­°±°¯®±«¬±°²²¯®®±®¬±­¬®­±¯®®­°¬®­¯¯¯¬¬­­¬°¬¬²­°¬®«¬­®¬¬­««­°°¬°®®¬¬®¬©«ª­®­¬­­¬­­ª¬¬­¬ª¬­¬¬®­«¬©®«¨¬¬«®¨¬¬¬«­«©©¨§¬¬«««¨­«§©ª¥«ª¬§©©ª¥©©§§ª¦¨©§¨¨¥¥©¥¦¨§¨§¤§¨¦¨ª§¤ª©§ª¨¨¦§§§«   ¢¡¡ ¡ ¡¤ ¢ £  ¢¥¡¥¢¡¡¡£¢¡¡  ¡¢¤¢  ¤¤ ¦¢¥£¥£¤¤£ £¦ £¢¤§¡¥   ¥¢¢¡£¥¦ ¥¢¥£ §§¤¢§ ¥¤¦¡¨¢¢¤£¤¦¢¥£¦¤¦¢§©¦¤ª ¨£§¥¨¢§¤§£¥¨¬§¥¥¦¥ª¦©¤©¤¬¥¦©¦¢§¥§¨ª©§¡ª¦«¥ª§§¦¬§©¨¬§«ª«¨­¨¨©«§©¦©¦ª¥¬¬¬©«§«©§§¬§¬§ªª­§¬©¬©ªª«§¬ª­¬¯¨«¨¬ªª§«­¬¨¬©¯¨¬¨¬©¬«¯¬ª¬²¨¬«¬®¬­­ª®¬¯­®¬¬¬­­®¬¯ª²¯±ª¬¬±¬®®®°®©³®°ª¬««¢¨ £iubn`xlUr_QoWKiODbYF`SI_WOb_Wi~Úªõ¹µõ®ÄéªÃí®Áõ·Åò·Èò¯Âï¬Ãã¼Ô´¹¨¨wrz¤®´¶¾Â¤É§Ì¨Ô®Ü¤­ã§·é®»ï³»ò¸Áö»Èù¼ÇùÁÌúÂÐú¿Îú½ÊúÀÐú¿ÎúÁÒúÀÑú¾ÒúÁÕúÂÓúÄÒúÆÕúÅ×úÅÓúÆÜúÆÜúÈÝúÍÞúËÝúÍáúÎâúÐäúÕæúÖèúÛêúÝëúÚíúÙïúÛíúÝìúÛðúÖíúÕíúÑëúÑéúÎäúÍæúÌçúÊæúÂâúÂàúÃßúÈäúÌàúÐáúÏâúËáúËßúÆßúÁÛúµÛú©ÒøÌèÅÛ¼Í·Ì²Ø±Û²äµæ ·ê¡¹è»ã¹Ü·Õ³Ì®È¬Á§¾ ·| °z®z¥n§t¡r¥qªq±w¶{¿|Æ¥Ì£Ì¥Ô«Ò¨Ì¨È¬Å¤À§Ã¤¼u§½t¦ÆxªÌz©Ó¬â®ñ¥¹ô¬¾÷¶ÃúºÆú»Íú½ÑúÁÓúÂÓúÇÙúÈÝúÊÛúÈßúÌãúÏäúÐæúÍçúÐäúÐæúÎæúÎáúËäúËáúÐáúÌßúÈâúÊÝúÊÞúÊßúÆÜúÃÜúÈÚúÂØúÂØúÁÖú½Ñú»Ðù¸Ðö³Êñ³Æï­Ãì¬Áë«¾æ¬Àâª»ã§ºä¬ºå¬·ãª»æ¬ºâ«¸Ýª»ß¨¶Ø¥´Ö ±Ò¡®Ì­Å¬¿¡µ¬©~£{u{uqkgb|_x{fz{]uu]ur`nr`uu_rubnq]t~gqoukzgxd{`xgrdtuYt[MlWObSF`WMbUO]SK`USf]Q`WMbWD_SI_QK]QB[MM]UK_SK[UI[YK]UB`KF_SI[UIbUI]WOb`Ogidru¢¡¢¥ ¢¢¨¦¥¥¤©¤¦¦£§§¦¨ªª©¦§©©«ª­ª©¬¬²¬¬¬¬­®§«¯®­¯¬°­¬°®­¯­¯±®°³²°®²¯­¯´³·®´³°³³²·´¯²²²²³°³µ³³ µ²³³·µ³±±²´µ´³ ³¶¶´¶´³´·µ¹· ¶´¡¹´ ··µ¸¹¸¡·µ ¸¸·¹¶·¡¹·µ·µº¥·¶¡¹¹·¹¡´·¦»¹¡¹· ·´·¸·¸´¶ ¶µ¶· ¹º´µ¤¶¸¡³¸¶´·µ¶··· º¶··¡´³¤·´¶¹¡µµ·´º¹ ¶¸·µ·¶³µ·¶¶·³µ´¶ ¸¶¡´·¡µ²¸µ´¶³³¶´³³¶¶·°¶¶¡¶³ ¶³¶¶´·¶±¶¶µ¶ µ³ ´´²·³³ µ³³µ²´³µ²³¶³³·²³³² ´´ °³±³³¯´³ µ±±µ²¯²³µ°³±±°³®³±¯®³¯¯µ ´¶´¯¯°²³µ°¯²°³®³²µ°°®°°±³°²®¯²³¯ ²°°¯±¯²¯­¯¯¯®®­¬®±°­¯«¯¯®¯¯¬¬°®¯¬®±­¬¬­«¯¬®¬¬¬ª¬®¬ª­®®°®®®¬¬­®¯¬­¬¯¬«z~||| ¡¢ ¡   ¡¡¥¡¡ ¡¢ ¢ ¢¢£¦¢£¡¢¡¤ ££¤¢¥  ¡¢¥ ¡£§  ££¡£¢¢¥§¢¥£¢¡¤ ¨¢¥¤£¡¥¡§ ¥ ££¤ £ ¥¥¡¢£¦¦¡££© ¥¥¦£¨£§¢§¥¥£¨ §¤§£§¡§¥§¥©£¨£¤¤©¥«¨§¥§£¨¤¥¦¨£§§¦§©£¨¥©¥§¥©§©©©¦¬¢ª¨§¥©§§¦«§¦¥¨¦«¤¨£zfnWi[xgQt[FoQBbI?]I:QI?YM?YMF]w|tÊð°®ö­»í¦Àå£¼ë¨»î°Àò²Àó´¿î§¼Ü¸¼««tgnw£z­~¯¸¿ÁÅ¡Ë¥Ô«Û¢­ã¤³ê­ºí·¾ðµ¾ô¹Ä÷»ÇöºÊø¹Èú»Èù¸Ìú»ËúºËúºÎú½Ðú¼Íú½Íú¿ÎúÁÑúÁÒúÁÓúÁÒúÂØúÇ×úÈØúÆØúÈÝúÌÛúÎÝúÎàúÓßúÏáúÔãúÒäúÓäúÔæúÓåúÒäúÏæúÌãúÌãúÊâúËãúÊáúÅáúÂÝúÁßúÀÛúÃØúÉÙúÊßúÈßúÅàúÄßúÃÜúÀÙú»ÙúµÔú­Òú¢ÌôÉîÃä»Û¸Ø´Ú³ß¶ß·ä¸ä¸ä¸ÞµÕ²Í°Î¬Ê¬Ã¤¾w ¸| ±t°q°r²qºu¼wÅÊ¢Î£ÑªÔ©Ò¬Õ¨Î©Ê|¥ÊzªÊ¨Óz¨Ù¬Û°Û°á®ã¯æ¶î·í¢»ö­¾ø°Áú³Æú¸ËúµËú·Íú»Îú¾ÐúÁÖúÅÙúÅØúÉÞúÊÝúÌÝúÊãúÌàúËÛúÈàúÅàúÇÜúÃÜúÈÜúÇÝúÄÛúÆÜúÃÙúÃØú¿ÓúÀÔúÁÒú¾Óú¾ÐúºÍú¹Í÷·Èõ®Èð°Äï«Áëª¾æ¨½à¥¹á£¹à¥·ß¥µà¥¶à«´á¥´Ýª³Ý¦µÜ¢²Ù£®Ó®Ð¬Ê«È©½¡·³¦wtqqnnd`x{]wx_rtWruUqqSqlQlnWglYlkSkkOkq]ix`k~`n|_t~]u_q`rfq[tgKlOBdKB]K=WMD]IDYO?UMFYS?YKBYM=WI8YF=QI:QI8UI:QO?SD?UI:QI?Q?=UKBSMBWD8YOIYYM`kfnzz¡ ¢¢ ££¦¢ ¥¡¡££ £¡¤¤¥£¨¤£¥§£¦¥«¨¨¦¦£©§£§¨§©«ªª«©««©¨¨®¯¬¬¬®ª«ªª®­«­°¬¬­®¬®­°¬«­­­¬¯¯«­¬®¯®°°¯¯¬²°°²²¯­±²µ±±´³°²±°³±±²²³·³±°³²¯²³¶´±³²³´´³³°±¯³³³±²°¬µ³³²¯²³­°±³°´²®¯²°²³°³²²´®²²¡³²´°²±±¯²®°³°°±±±°®®±­¯³®´²¯²¯®²±°®­®³¯­±¯®°¯®®³°°®®±¯°²±¯±­­°®¯±²®¯°®­ª¬¯°¯°¬¬®­¯®ª¯­¬¬°®¬²¯¬©¯¬¬®¬®¬­¬¬²®©­«¬®¬¬¬«®¬¨«¬«¬«¨­¯«®¬«­¬«ª«­««©¬ª¬¬¬©««¬¬ª©¬¨«ª©¨¬¬«©©¨©§§«««ª©¬¨ª«¦§ª¨§©¨¨§¬¨¨¦§§©ª§¨¨©£§§©§¨§¨ª©§¨¨©¦¦¦ª¦©  ¡¡¢ ¢ ¢  ¡£¢ ¤ ¤ ¡¢ ¡ ¡¡¡ ¥£ ¢ ¡¡£¢¡¥¤¢ £¡ ¥¢£¡£¥¢¢ ¤¤¥§£¤¥¡¦¤¥ ©¢£¢£¡§¦¦£¤¡¦ ¤¤¦¢¥¢§¢§©¦§¨¦¨ ¦¤¦£©¥§§©¥©¤¥¤¦§©¡¨¡¦¤¦§ª¦¨£©§ª¦¦§¥¡¨¨¬«¨¦§¥¨ªª§ª§¨©«¤ª¦©¨§¦¬©­©§§¨¦ªª¬ªªª¨««¨¨¦®©ª¨«ª¨ª¦¨¬©­ª®¬¬¦¬©¬¬¬©¬¨¬­¬§­©®­ª««ª¬©¬ª­ª­ª¬¬¬¨®¬¬¬¯¬¯¬­¬­ª®¬¬®®©°®¯®¯¨¬¬¯¬«¯°¬¬«¬¬¯®¯¬­§©¨¬©©£ukw_q[kSu`QnYKd[K_]IbUOf[KfzzxÄó¹¬ú»¾ø­Çî¨Æï¨¾ò­Âð³Åö»Áó°Ãè¡¿È³»¦¬x u{¥³´»ÁÇ¡Ê©Ò¨Ù£°Þ¥µã¬»é³¾í¸Áô¿ÅøÁÇù¿ÌúÃÊúÂÌú¾Íú½ÐúÁÎú¿ÑúÁÐú¿ÓúÁÕúÆÕúÈÔúÆÖúÆÔúÆ×úÆ×úÉÛúÇÛúÌÚúÌÝúÌáúÍàúÑäúÒâúÒäúÖæúÓèúÕéúÔéúÔçúÕèúÒéúÑéúÓçúÐèúÑêúÎçúÌãúÊäúËáúÆÝúÇâúÊßúÐâúÍáúÈâúÊàúÈâúÆßúÃÜú¾Ûú½Úú¸Öú¯Õú©Õú¡Ïù ÉöÊôÄïÂìÂíÁí¿ïÃð¼ì¾é¿ä¼á»Ý·Ù·Ò²Ò®Ë­Ë©Ì¨Ê«Ó©Ú°ß³ãµã¶æ¸á´ã¶à·ÞµÝ·Ý²Ü³é³í¾ð¼ð¼ñ¾ó¤¾õ¦Áõ«Àø¯ÅúµÇú»Ëú¹Ìú¿Íú¼ÐúºÒú¾ÓúÇÖúÅ×úÇÜúÌÚúÌáúÎáúÎãúÐäúÎáúÐäúÐæúÊäúÏáúÍãúÌßúÌÞúÌâúÇÛúÉÞúÄÛúÃÙúÅÖúÅØúÃØúÃÓú½Òú¼Ïú½Ïù·Ìõ³Îò¯Æï¬Åì¬Âè­½ç®¼å«ºâ«ºã¬ºâ¬¸å¬ºä®ºã¨¹Ý§·Ü¤³Ù¦±Ö¡²Ï«É¨Ä¥½´©~¡z¤rxtnkbzgz{dw|bu|`uu]t{dqubqz`tz]nzgoiuiwfzgznww|obxrSuWFgSMbUFbWKbUO_]Md]O``KbYK_SI`YB`OI[QD[WK_WK[QI]OI`SFY[K]SK_[B`WM`[MbbUbi_i~ux¢¢  ¤£¡¤¤¥£¤¤¦¦¦¤¥¡¥§¦©¨¥ªª¨§¦«¬¤ª©¦«¬­¬«¨©ªª©¬¬¬©««¯¬±¬¬®¯­²«³¯¯±²²°³±­³²®²°®²²±¯²±±³³³¯²³ ±³¯±²³³°´¶²¶ ³µ ³³¶·±´¸·¶¹¡³¹ ¹· µ· µ·¡µ··º ´·¶µ£¸» ¶¶ ´·»¼¸»¡¶· »·¢¶¸¡¶º¢··»¹ ·¸¡µ¸ µ·¡ºµ´¶ ·µ¤¶·¶· ··µ·¶·µ·µ´¶¶¶¶ ¸´¤¶µ ¹·¡·µ´¶·µµ¹ ¶µ¡·´ ³³³´ ´´³· µ¶²´··¶´¹´ ´µ¡¶·´µ ¹³²µ²¶µµ³³³µ¶µ¡³µ³´´´³³ ³³¶´¡²´µµ´³¶´ ·´²³³´¶³³±µ²²µ³±´³³´®³´³²¶²³´±±³±³¶³²µ±±¯²³µ°¯²­¬³­±±¯´±²³³®°µ³³®­³³°®®®²¶¯³¯­®­­­±¯³®®°¯°±­­®¬¬°¬¯³®¯­­³²¬¬®­®¬ª«®«°®¬¬­¬¬¬­®ªª®¬¬®®­­°¬¯¬®­­¯z~x|{|{~|   ¢¡ ¢¡¢  ¡¡£¡¤  ££¢££¡£¢¢§¡ ¢¥¡¢¥§¡¤¡¢¡§¢ ¡£¡§ ¥¥¢ ¦¥§£§¥§¢¤¢§¥¥ §¢§©¨¢¥££¡§¡¥¡§¤¢£©£§¦¨¤¬¥¦¥¤¥ª¥¨¥¥¤¨§¦ª¢©£§¦©§¨¤ª¥©§ª¤¤©¦¥ª«¨§«£§£ª¥«¤§¨«§§ª«¤«¨ª©«£§¤©£££¥tzgtQ~gUz_KqYKgO?`I:[M?UK?YMD]fbgµè±¦ù·»ú³Åö¤ÆëÁçºç¨Áî¬½î¨¿â»È±Ã¤²{¢ln{¦z¬´ºÁÄÊ£Ð©Ø­Ý¢²ç­¶í±»ð´½óµÃõ»Æù»Êø¼ÇùºÊú»Èú·Ìù¸Ìú»Ìú½Ìú¿Ïú½ÐúÁÏú¾Óú¿Óú¾Òú¿Óú¾ÓúÃÓúÃÖúÆÖúÆÝúÇÙúÇÝúÈÛúÎáúÏßúÎãúÍáúÒäúÎäúÏãúÐãúÈäúËæúÊáúÊàúÅàúÇÞúÂàúÃÝúÂÜúÅÜúÇÛúÍßúËàúÆßúÃÜúÁÙúÁÛúÁÜú¾Øú¶Öú´Öú­Óú¬Îú«Íú¥Ëú£ËøÆôÆòÄïÁïÀí½ñÁï¾ì¾ì¾é»é»äºã¹Ý·Ý²Ö²Ø®Ý³á±è´ë·ìºê¼æ»ç·å¸â·á³â·ã·â¸ê·ð¡¹ò Áð½ñÀô£Áó¡¾ô©Áô®Ãø¯Ãú³Éú³Èú¶Êú·Çú»ÎúµÌú¾Ðú¾ÑúÆÖúÄÕúÆÛúÈÜúÍÜúÊáúÊÝúÊßúËßúÈÞúÉÛúÇÛúÆÛúÄÚúÄÙúÄÙúÃ×úÂÕú¾Õú¾Òú¿Ïú½Òú¼Îú»ÌúºÌùµÊõ´Åñ­ÄìªÂî«¾ä£»Þ¥¹á¢»ß£¶Ý¥¸Ý£³à©³Þ«¶Ü©µß£²Ö£³Ö¯Ô®Ï¬È¨Ä£½³²¥wornlg~g|]|u]ww]qxYqr]orUln[nq[ktWioWno[nz]k|`t|[n~_niunuqzi[|bFlM3_I?UI8SI=UQD]OIUQKWWB_I?YQDYD=UO=UM:Q?5SK:QK?SI8WM=UI:QI=WI8UK?UOD__Kfd_gwu|{ ¢¡¡ ¡¢¡ £¢£¤££££¥¥£¡¤§¡¥¡§¥¦§¨§§§©¨«­©§¥©ªªª«¬©©­««¬«ª«­®¬ª¬ªª¬¬««¬«©««¬¬¬¯¬¬¯­°±¯°³¯±¬®³µ±±¯°®²±¯°²°®²²°²²±­³­²³²°³±²³±°´³°¯´²®²²³°³³²°²²°³²®¬³²²²°°±³°±³°¯³®°³²²³±±²³°±±®±²³³±®±¯®±­­³°¯°¬®®²¯°²­®°°©°´³±®¯°¯°°¬°¯¯¯±®°¯¯°¬¬¯¬®°±°¬­®®¬²±®­®¬¯°±®­®­«­°ª¬¬¬°¯©­­¬¬­­¬¯­®¬¬®­¨¬®¯§ª­¬««°«©©®¬®¬¬­«¬«­«¬«¯«««­«¨¬©¨«©¬©«¬«©®«©ª§«¬ªª¨¬©ª©¨¦©¦«©¨«¬§©¥¦§©©¦¦ª©§§©¦§©©¨§§ª¨«¥¥©§¥¦«ª¤¥§¦§«£¦   ¤   ¡¡¡ ¡¢  £¢¢£¤  ¡£¡¡¡ ¢¢¢¡¡¢¢¤¡¦¢£¢ £¢¤¢¡£§¡£ ¢ ¤ ¤¢¤¢¥ ¤£¡¥¦¡¦¡ ¥§£¨¢¤¥¨¡§¡¨¨¡§£¨¡¨¦¦£¥¥§¢¨¥¦¤¤¤¨¦¨¢¥¥§¥©¤§¤«¢¦§© ¦§¬¦¨¤ª¦©£§¥¬§ª¨¨¨§¥«¤¦©®§ª¦¥§§¥§¥¬©¬¥«©¬§¦§¬¤ª¨«¡¨¦«¨¬¨­¨ª©«§ª§­ª¬¦¨¥¬©¬§«¬¬¬­©­¨­¨­¬°«¬¨®¬©©®¬¬ª­¨¬©¬¬¬¬¯«®®­¬­¨­««¬ª­®®¬­±¬¯¬¯¬®«°®¬­°¬«©­¬¬®­­°¦«¥ªª«¦¨ u~iubiWziQu`FnUQlSO`YF`UMflbn¤é²¤ú¿»ú¾Æú¶Ìø­Èõ¦Æì¤Æï¬Áí­¿ç¢¼Ö¶Î­Ê«¬~¤¤x¥¬³·½Æ¢Ç Ð©Ó ­ß¥±â¬¶æ­»ñ¶¾ñ·Ãö»ÄùÁÇúÁÌú¿Îú¾Îú¼Îú¼ÎúÄÑúÁÒúÀÓúÁÒúÁÐúÂÓúÂÓúÃÖúÂØúÆÖúÃÖúÆÚúÊÜúÌÜúÏßúÌÞúÎàúÎãúÐäúÒãúÒãúÖäúØçúÑèúÕçúÔçúÐãúÎèúÓäúÌèúÉäúÆãúÆãúÊâúÉàúÌàúÌæúÐãúÎæúËâúÈÞúÈàúÆàúÇÜúÅÜúÀßú¹Ùú¸Öúµ×ú¶Õú³Ñú°Ñú¯Ñú­ÐúªËø¨È÷¬ÉöªÈø«Èù¨Çú¬Ìø¬ÈöªÆø­ÇøªÉö¨Æñ¡ÅïÀë ¾ì£ºð¼ñ¦Âö³Ãõ¬Çõ«Èõ­Æð¦Çð¦Ãï¤Àî£Áí¤Àí¥½ê¢¼ë¥¿ñª¿ô¬Ãø¬Ãö¨Æø¤Ãö¨È÷®Ãú°Åú³Êú´Èú´Çú»Ëú½Ðú¼ÏúºÑú»ÐúÃÒúÂÓúÂÕúÆØúÌÝúÍÝúÎÝúÏâúÏàúËäúËâúÎãúÊàúÍÝúÈßúÌßúÌßúÉßúÆÚúÄÙúÃ×úÃÖúÁÖúÁÕúÂÓúÁÑúÀÐ÷¸Îö¹ÌóµÊï²Æñ²Äì­Ãé¬½æª¾á¬¹ã¨»ä¬ºä¯¶â¬»á«¸ã©¸Û§·Ù¨µÛ¢²Ò¯È¬Æ§Ã¥»¢³©{¤z zttrnfg~f|{b~~fw~]tu`x~`u{fr{`tz`xkqfxgwoww~zobdMqSIdQK]QM`WM`YQ_WQ_[W``QbUId]KdQDbUK]SI_MB_UD_SKWUD`QK]UKYSI`YD[[K`_Sgb[nuur ¡¢¢¢¡ ¢¢£¡¤¤¤¤£ ¥£¡¥¥ ©¦¨§¤¢¨¨§¥©¨©©§ª¬©¨¬¬­ª®¬ª¬¬¯¬®¬¬±¬¬®¬®ª®­¯¨®®¬¬¬±¯­®­«¯­°®®¯°±¯°³±±·³³²°°¶µ²´´³¶°µµ³ ´¹³³ µ³¶·¡´·´²¶³³´°¶·µ¡µ¸¸¶¸µ··¡·´·¶¡³´´··µ ·· µ¸´¸¢¸¶¢·¸¶·µµµµ¢¶·¶´´··¶ µ¶´¹¶´µ¶³·¶µµ´ ³¶³´¡·µ³³···´ ¶µ¶²¸·´¶³³´´ ´µ´µ´··± ´¶¶³µ· ³µ³³µ³³³¹µµ³³µ±¯³´´¶³³µµ °³µ²´³ µ³µ³¶²¯³®´²¶´³®³µ³±¸µ´³­²±³°°±±¶°±²²³´¯²¯²±³­°±­²³®µ²¯¯±²¯®±°±®°°±²³¯³°±°°®³®³²²°¬¬®°±¯®­¯°¬±®©¯¬®¯¬¯­®­®­¬­®«­¬­¬®°®¬¯¬°¯®¯®ª¬¬¬¬®¯­¬¬°«¬«®®«¯~|{~||{|{~||££¢¡ ¢¡££¡¡¡¤£¡ ¥¥¢¡¡¡¢¡¤£¤¡¤¡¢¦£¢¥ £ ¥¤¡¢£££¤ ¥¥ ¥¢ ¡§¢¦¡¥£§¡¤£¦¢¤¡¨¡§£¤¨¡¡ ¥¤¦£¤ ¥§£§¡¤¤§§¤ª§¥£¦¡¥¦§¥§£©£§£¥§¨¨¤¢¨§¦¦¨¥ª§¥©§ª¢££¨¨«¤¦¨©¤§¦«¥«§§¤§§¬¦¬¥¤¥©¦¬ §¡¦ ¨¢¤ f{]iW|iOtYFlYBbMB`O=UO?YKB]YOgzÛ«ò¶²ú»ÂúºÇú³Êù©Èì¡Âæ¡¾è·à·Ó·Ó¬Ì©µ|§£u¥{¨|¬~´º¼ÃÈ£Í§Ö¢©Ú¤¯ã¨µè®·ë¶¾ð¸Ãö»Æø¸Å÷ºÌù¹Êú¸Èú¹Ëú½Ïú¾Ìú¾Ìú»Îú¾Ìú½ÏúÁÑú¾ÐúÀÑúÀÒúÃÖúÂÖúÄÖúÇÖúÈÙúÈÚúÉÝúÊÜúÌßúÌÞúÍÞúÍàúËàúÏâúÉÞúÈàúËàúÉßúÊÝúÇàúÃÝúÀÛúÂÛúÃÝúÈàúÉáúÎàúÎâúÈâúÆßúÃÜúÃØúÅÛúÀÜú¾Ùú»Õúº×úºØúµÒú³Ôú³Òú­Ïú°ÎúªÊú­Çø¨ÈøªÉ÷ªÈú¬Ê÷®Èù²Èù°È÷°Êø²È÷­Êõ¬Éô¦Ãñ¤Àî Áê¥¾ð©¾ô®Ãö¬Ãø¬Èõ­Çõ¨Æï©Ãï¥Àí Âê£¾ë¡Àè¢»è¤¼ç¡»ê£¼î§¾ó§¾ò¥Ãô¥Áó¢Ãö¤Âõ©Áø¬Ãø©Ãù²ÆúµÆú¶ÊúµÎúµÌú¶ÌúµÊú¸Ìú¾Îú¿ÔúÅÕúÆÛúÉÜúÊÙúÇßúÈÜúÆÜúÊÛúÄÚúÆÚúÇÚúÃÚúÃÕúÁØúÁÖúÃÕú¾Òú¾Öú¾Ðú¼Ñú¸Îú»Ïú¸Èõ³Ëó°Çï®Áí­Ãë¬Áæ¨¼â¤½à¦»à¤¶à§¶Ý¤·àª³Þª²Ù¤´Û¤³Ø¢³Õ±Î©ÍªÆ§Á¢º³¬~§xonwgdg|bzz_zx]qw[twYqu[rqYtnYinYkrYntWnw`k{`t`loxw{twbzQuQ?gK8[?:[I8WM?QK?WMDUOFYUK[M?[O=YK:UI5UF=SI=UF=SD:UFBUI?YM:YK=]I?YQD[[M]_Yfuuqzz|~|~~~¡¡¡ ¢¢ ¡££¥££¦¥ ¦§§§§¥¨¦¦§¥©©¦§ª§§©§§©¥§«¨©§ª©¨¨©®«««¨«¬¬²¬«°°«¬­©¬®®®°¬¯°±³°¯®±®²±®¯°±°®²¯²°°²±µ°²±²³°²³²±³±±±°³±²²±¯³µ²³³±±²®³²²¯°²³°®°±±°°²¯¯²±³°°±±³±°°´®°±°¯­°­®¯°¬®±°±°°²±±³±­°®°±²®®®­°°³¯²¬±¬®¬¯®­®¯®®¬¯®«®²®®®¬®°¯°¬¬°­®²¬±¬®¬®«¬¬¬«®¬¬­ª­®«°¯«®®°¯¬®¬¬«®«®­®ª¬«ª¬ª©­®®­¬¬®¯©¬¨¬¬ª¬ª¬¨®ª«¬««¬ªªªª©©¦©«¬¨¨©«ª©©¨©¬ª¥¨ª§ª¨¨ª©¦ª§¨¦¨¦§§©§ª¦¬ªª£§¦«¦ª©ª¥ªª¦¦©¦§¦¦«¦¦¦   ¢  ¡¡£  ¡¢¡ ¦ ¡¢ £¢¤¤¡    ¤¡¢¥¡ £££¡¢¦¡¢¥¡¤  ¡©¢¢¦¤¢££¤¢¥¡ ¤¤£¤¢§£¤¤¡¥§¡¥¥£¨£¦¥¥§¨£¦¥¨©¢§¦¥¡¨¢§¤§¢§¢¤¤©¤¤¤«¦ª¤ª¦¨¥¤¦ª£¬¨¥©§¢¬©§¤¨§§¦§¤§ª§¤¨§§§©¦¬¥§«¨§«¦©ª¬¨ª¥¨ª¬¦ª§ª¨­¨ª¨¨ª««¬¨ª¦­©¬¨¯¨¨¨«§­«¬§¬©¬¨ª©©ª¬«¬ª®¨­©¯¬¬«¬©¬®¯ª°¬¬­¬¨¯­®¬­¬²©¬¯¬¨¯®¬¬¬«¬¬®¬¬«±¨¯¬¬«¬¨¬§ª¦¬¬­«ª¤¨unw_oYnUtgKgYKgYFbWKdSMddYk{Û¨ò·­ú¾ÃúÂÌú¿Ðú¸Íù®Æñ¨Æë§Áæ£ÂÛ ½ß¤·Ù³Ç­«¥ª±²·Á¿¤Ä¡Ë¦Î§Ù£°Ü¨·ä©ºé±ºðº¿òºÄö¾Åú¿ÈúÁÍú½ÎúÁÎú¿ÏúÁÔúÃÐúÁÒú¾ÐúÂÒúÂÓúÅÒúÃÓúÃÖúÈÖúÆÛúÅÙúÊØúËÝúÎÝúÐßúÍÜúÏâúÐãúÑâúÒãúÑäúÐæúÐäúÎäúÐâúÊãúÍãúÌãúÈãúÉßúÈãúÊãúÍçúÒåúÐæúÑâúÒçúÍãúÉàúÈâúÊÛúÅÞúÁÝúÁÛúÂÜú¿ÛúÁÙú»ÛúºÙú¹Õú·Òú¸Óú¶ÑúµÌú³Ïú¶Ìú·ÑúµÐú¹Íú»Îú»Ñú»Ïú¾Íú»Óú¹Óú³Ì÷­Îó¬Ìò¯È÷¶Çú·Ìú»Îú¾Òö³Ñ÷³Ðö²Éô¬Èô¯Èð®Æí¬Æï¬Ãì®Âì«½ð«Àð¬Áó°Âò¬Äõ¬Ãö¬Äö¬Èú¯Åú°Éú´Êú¹Êú»ÍúºÎú»Óú¹Îú»Ñú¾Ñú½Ñú¿ÓúÃÓú¿ÕúÇÛúÈÛúÊÛúËáúÊâúÊÜúÎâúÌÞúÊâúÌßúÈàúÉÙúÈÙúÇÙúÃÙúÈÙúÁÖúÁÕúÁØú¿ÒúÀÒú»Ðø¹Ìõ»ÌôµÆñ°Æï¯Âî®Áè¬¿å­¼æ¨»ä¬»ä­¹á­·á«·á§ºà©¸Û§¶Ù£µÕ ¯Ï°ÇªÁ¦¾¢·±®u{ronib~d|bx[z|dxwfrxgqubwzdw~ftdwlwqz|| { ziwS|[FkQM_MD_QK_WK[[KbWK`YOb]QdSK_WOYUI_SF`WM]SO`OI_QK_QI_SI`UK`[MbQO``SinWkqkx  ¡¢¡¢¥¢¡£¡¡¤¢¢¥¤¢¥¡§¦¤¤¥£¡¨¥§ª¨§ª§¨ª¨ªª¬ª©©¬­¨¬¬«¬¬«¬¬ª¬®¬¬¬¬¬¬¬¬¬­®²¬±­®°°®°­²³³¯³®¯±³³´¯´³´¶´ ´´¡²³³³¶³´³´µµ·´¶µµ´µ³³·¶·· ¶¸ ´´·¶¡µ·¡·µ ¶·¡¶¸·¶·µ¡¸¸¡µ·¶·£µ¶µ°¡¹¸¢·¶¸³¶¶¶· ¶µ¶¶³´³¶´³¡³³°µ¸µ³¸ ³³¶²¶µ³²³²±²³´¶³¢·· ¶³³³´³¶µ¡´³´µ·· µ²²³³´µµ·±³³°³ ¸³ °µµ²³´¶µ¡³³µ³³³ ´µ³³³²´³³¯³¯³±²³¯³²µ²­³³³³¡²±²³¯¯®³µ±±¯­´°­±®®­¯³³°³³¯°°²²³±¯³²±±±°´¬¬­°±¯¬³²¬¬³°³±­±®«¬«ª®°©°­«¬®¬¬¬¯®®®¯©¬«­®­­®¬¯¬¬­®¬ª¬¬«¯­¬¬¯¬¬¬­¯¬®¬«­­®|~{|||{{~~|{|~~| §  ¥  ¢¡ ¡¡¡£¤ ¤ ¡¡¤¡££¤¡¢¡¥¡ ££ £¥ ¥¤ ¤¤£££¡¤¥¡¢¡¤¡£¢¢ §££¡£¥£¢¥¢¥¢¤£¦¡§¡¦¡¦¥£¡¦¢¥§¦ ¤¢¦¤¦¢¦¤¦¥§¤ª¤¦¤§¤¤¡§¥§£ª¥§¥¨¦«£©§¨§©¥¦¨©¦©£ª£§§©¥«¥ª¥¨¤©¥¨§¬¥©©«¥¨¦©¤«£¢ª¢£ ¡zdt[|iU`OqYDfUDgM8_O:YM?[QD]nio¾ä«§õ·ºù¹Áú»Ëú¸Ëú¯Èò«Çæ§Ãá£¼ß¡½ß¹ßµÈ°«{£©|©¬|³³½ÂÈ£Ì§Ñ§Ø ¬Ý¤²ç«³è¯ºì´½ð¶Ãô¸Ä÷·ÆöºÇú½Êú¾Ëú»Ëø¾Êú»Îú½Îú½Ëú»Íú¾Îú¾ÎúÀÏú¿ÓúÄÓúÁÓúÃØúÈÔúÇ×úÄÚúÈØúËÙúÌÝúËÜúËÜúÊÜúÊÝúÇßúÆßúÉÝúÈÞúÅÝúÁÜúÄÛúÄÝúÄßúÉßúÌáúÍáúÊâúÊáúÉáúÆÞúÁÚúÁØúÁØú¿ÙúÁ×ú»Øú¾Øú»Öú¸Öú¸Óú·Óú´Óú¶Ïú³Íø®Ìú³Êú­Íù³Æú´Éú³Êú³Ìú¶Ëù¸Îú¼Îú»Ìú»ÎúµÒú³Ìõ¯ÌôªÇõ°Æø´ÊúºÌú»Ïú¹Îù·Ðó¯Íô¬Èò±Åð­Æñ«ÄîªÁê§¿è£¹ê¨¹ê£¾è¢»ì¤¿ì§¾îªÁð¦¿ó§Áó©Áø¬Äö²Æø²ÆúµÈù·Êú¸ÎúµËú´ÎúµÌúºÈú¼Ïú¹ÐúÀÒú¿ÔúÁÕúÃÔúÆØúÃÛúÃÝúÃÛúÄÛúÆÚúÁÚúÁÙú¿ÔúÀÖúÀÕúÁÖú¾Òú¼Óú»Ïú½Ïú¸Ï÷¸Í÷·Êö³Èò®Æï°Ãì­Áè§Áäª¼á©¹â¦¸ß§·Ý©¹Þ¤·à¦³Ù¤·Û£³Ø¢±Ó ±Ò¬ÌªÊ§Ã¥¾·°§|ª|rnnkd|d`{|[x|[txYtqWouWqtUnuWku[nt]n{_q|]nfwnzu~uzqYx_BqD5bF=WF5QI8UFBQO?WI?SK?SQBWQ?YM?]?8WM5]I:SI=SF?QI=YM=SI?UM=WQD]SB[]OgdWkwqquuzx{w|z~~~¡¡¡¡¢¤£¢¢£ ¡£¤¢¨¡¥¥¥£¥§¤£¨¥¦£©¥§¥§£¥§§¨©¥¦«£©«¬¬©«¬¬®¬­«ª«©¬°­±°®­°®³°¯¯¯®¯®¯¯°®­­°®°³²°±´°±²²®²®±²°°µ®±±°¯°³³²±²³°³³¬³³¯³°²µ®®°­°²°³²®¯°³®³®°®°­°±±°±®³°¯±¯³®²²°¬°¯³°°­¯­¬¯®²°¯¬¯°±¯®°°­«¬­®°¬¬®­¬°®­¯®¯®¬«±±¯¬¬­«ª«®¬¬¯°¯¬¬®®°®¯ª¬¬«¯®«®®¬­««¬¬­ªª«®¬««­¬¬¬««ª««¬©ª¬¬¬«¬¬¬®­¬ª­«¬¬ª«®¬«ªª¬ª¬¬§ª¬©©«§«¬¦ª¦ª©ª§§¬§¦ªª¨§¤¥¨¥¨ªª¤¨¨©¤§©¥¥¦©¦¤¥¨ª«¦¦¥¦§¨§§¥¨©¨©¨¨     ¡£   £ ¤¥£¢¡¤ ¤£ £¢¢ ¤¡¥£¤ ¢£¢¦ £¤ ¥¤¡¢§£  ¦ £§ £ ¥¢£¢¥ ¦£§¢¨ ¨¢¦¡¥¤¤¡¦¢¢©¤¤£¤¥£¨¢¨¢¦¤§¦© §¡©¤¥¤©¥§¦§¢ª ¥¨¨ ©¢¬¦¤¢¨¥©£¨¦ª§¬¤©¦¨£©¥©¦«¤¨¡«§ª£©¤¬©ª§©¦¬§«¡«§©¦«¦©¥§¦¯¦ª¥¬¤©§¨¤¬ªª©©¨¬¨®ª¬¤¬ª©¦¬¥¬©­«¬¦¬§¬­¬¨­¨­ª®¨°ª®©«¨¬«¯«¯¨­ª¯©¯®¯¬¯§®«®­®¬­¬®¬®¬¬¬¯ª¬¦¬¤¨§®§©§¦¦u|lw`kUgQt_QoYKlYMfUMf[Mffft©ß§ ð±¹ù¹¿ú»Êú¹Ê÷ºÊð³Èï°ÆçªÂä©Áì¬Ãî¨¿Ü»·¬¯¤±³´¸Á¢É¨Ì¨Ï«Õ°Þ¨­Þ¨¶ç­¸í³¼í³Áð»¿õ¼Åù»Ëù¼ÍúÀÒúÁÏúÃÌúÁÒúÃÒú¾ÑúÃÐúÁÐúÁÒúÃÒúÅÑúÈØúÆ×úÇÛúÇÜúÈØúÈÛúÈÜúÊÙúÎÜúÎÝúÊáúÍãúÎâúÌäúÎáúÊàúÊáúÌâúÈãúÆáúÆÞúÉãúÌäúÐäúÓåúÑäúÐçúÎãúËäúÊãúÇÞúÇÜúÆßúÆÜúÅÛúÆÜúÆÜúÂÜú»Ûú»Ùú¾Øú½ØúºÕú»Õú¹Ïú´Îú´Ìú¸Íú»Îú»Ðú»Ðú½Ðú¿Óú¾ÒúÅÒúÁÕú¾ÓúºÒú·Óù·Òú»Îú¾ÐúÁÐúÁÕúÄÓú¾ÓøºÐ÷¸Îõ·Êô¶Éò³Æï²Æë¯Çî°Áë¬Äì¬Ãî§Àí¬¾íª¾ò°Äö¯Äõ±Æö²Æú¶Èù¹Ëú·ËúºÌú»Îú¼Îú»Îú¹Îú½Óú½Ðú¾ÎúÁÒúÂÓúÂÓúÁÚúÅÕúÈßúÊÞúÈßúÈßúÉßúÊÝúÉÛúÆÞúÊÝúÄÙúÅØúÄÖúÇ×úÃÕúÁÖúÀÓú¼Òú¾Òù·Ìô¸Ëô·Éó³Èî¯Æí±Åê³¿ç°¾è«½ä­¿å­»ã¬¸à§¶àªºà§¹Ý¥·×§´Õ®Î®Ê«Ç©Á¥º°±®{xungngg~fz{fu~b{zdrwbuxbwzbritl{kzu|xx~q]]IoIFgUI`OK[QI]SO]YM]SK`SObWM]UMbSK`UM]UD`UFbWKbOI_UF_UO]WO`SK`dWfdYil]wqft|{¢¤ ¢¡¤¥ ¡¥¤ ¢£§¤¤¢£¦¨¤¦¦¨¤¦¦©¬©©ª¨­©ª¨¨¨«§¬¨¬¬¬«­¬«ª­¬­«¬ª¯¬­¬­­°¯¯°³±²°´²³°³³µ³±³³µ²± ³³µ±··³¶ ´´·±³²´¶¶´¡µ·¶³¶³¢¶º¢¸µº³··¢¶³¶·µ´³¶ ´¶¡µ³¶³·³·¶¡³´¶²³´´´µ³´³µµµ´¶µ³±¶³¶³´´±°´³³¶³³µ°·¶µ¶³²³²³² µ°´¶´´µ°µ´´³¶²³®®³µ¯·²³´ ³³³³·±²³³±³²³²³°³³³³³²²²µ³±°¯³³²³±¯±³²°°±²²®´¬³´³±³²³²²³²¯°¯®³®±´®¯³±°²±±­±­±³®³³¬¯ª­¯²±°­°¯³®®®²«®­­«±ª¯¬®©³¬®±«¬­©­¬¬¬®¬¯¯¬©«¬±¬°¬¬©­¬®¬¬ª±­¯¬­¨®¬­®®¬­®«¬®~|~||~{||||¡ ¡¡¡££  ¡¤  ¤ £¡£¡¡¤£¡ ¡¡¡¡§£¡¦¢¤¤¡¥£ ¤¢¥£¢¥¢££¥£¤§¦ £¤¦£¡©¢¤¤¤¤¥¡¥¥£¢§¢¥¡§¥££¨£§¢§¢ª§¨£¨¢§¡§£§¤§¡©¥¤£¥¤§¥¦¤§¤¨¥©¡¨¡©¦§¦©¤«¦©£«¤¨©§¦©§§§©§¨¤¬¨©©«¥©§©¨¬¦«¤§§¤¢¨£¢|qdw`lU`Iq]IgQBdU=fSD[QB`WSg|zÊå¦¨ì¬·ì¬»ð¬Ãï­Ãî¯Ãì¬Æë©Àí®¾ï°Àð¦½Û¹¾°¬¥®³¯·»Ã È¢Ê¦Î©Ô¨Ý±ß§³æ«µé±¼ð´¾ñ³Àô¹Äö¸É÷»Èú½Èú»ÌúºÍú½ÊúºÊú½Ìú»Ìú»Îú»Îú¾Íú¾ÏúÇÓúÃÔú¿ÕúÁÓúÅÖúÂÕúÁÙúÇØúÇÙúÆÖúÈÙúÇÜúÆÛúÆßúÉÜúÆÛúÈàúÃÝúÆßúÆÝúÉÞúÊáúÌÞúÍáúÌßúÉáúÈßúÅÜúÃÝú¿Øú¾Øú½ÖúÁÖúÁÙú¾ØúÀØú½Öú»Õú¹ÓúºÒú¹Óú·Òù²Íô®Ìö®Èø±È÷³È÷´Êú·Êù¸Ëù·Íú»Ìú¾Ïú¾Îú½Ïú»Îú»Ðú½Ðú´Ðù·Ðú»Êú¾Îú¼ÐùºÏúºÐú¹Ïõ³Ìó°Ìó°Èï®Ãì®Ãë¬Àé«Àç¨¾ã¨¼é¤»î©¾ê¨¾ì§Áï®¾ð­Ãò¬Äõ°Ãõ²Çø·ÅùµÅú¸Éú¸Îú¸Îú·Ëú¶ÍúµÈú·Ìú¸Îú»Ðú¸Ìú¾ÓúÁÓúÃÒúÃ×úÃÙúÄ×úÃÙú¿ÚúÁÖúÃÕúÂÕúÀÕúÁØúÀÓú¼Ïú»ÐúºÐú»Îø¶Êö·Ëó´Èó°Æï¯Ãí¬Àé®¿è©Àä¨¾ä§¸âª½à¦ºâ©·Þ§·Û ·Û¤³Ù¢²Ø°Ò®Î«Ê©Ä¤Á¤º°®¬w£wuqlfizdbt|[zuYtxYo~YtqUotWkw[ox[o[ibqkur{{¢xxt`fItQ=dD=YF5YI=QI=YD?WMFUQBWMFWQDWKISQ=YF=YO=UQ?[MBUM:UK?]I:WO?WOB[]M`fWkfQlobltzx{xxxwz{z||{{{~|{ ¢ ¢¤§¢¡ ¢¢£¡ ¦¤¤¥££££¡¤¤¡¦ §§£¤§¥¤©§§¦©§¨§¦§ªªª©­§¬¬ª¬¬¬¬­¯¬®¬¬­°®¯±®²¯°®¯±°¯¯±²°®°´°´¯²°´²¯¯³²³°²°¬±°¯°²°³³®²³³±°°´²±¯³ª¯²°²²°±°±®±°²°³±®¬°²®°°±´°±¯°¯¯³±¬°­²®®±°®²®±²¯±®°²±®¬­®³®®«­­­°®®±®®®°¬®¬¯­¯¬­¬®­­­«®¯­­©¬¬®«®¯­¬«¬¬¬¬¬­®°°®¬¬¬¬«¬¬«¬®¬¬­©«§«©®¬¬¯¬¬®­¬®«¬­­«¬ª­­¬©­©­¬«¬«ªª©§©©©¬¬¬§«§¬§¦ª¬©©¦¥«¬§§ª«§ª«ª¦§«§¥ª¦¨¦©§©ª¥©§©ª¬ª¨¥¢«¦¨«©¦§§©¥©  ¡¢¡¤ £ ¢¡    ¡¤  £ £  ¤ £ ££ ¡££¤ ¤¢¢ ¤£ ¦¤ ¤¦¤££ £¥¢¢ ¨¥¤¥£¡ ¨ ¥¡§ ¦¥££¨ ¨¡§¤¦¡¨¡¤¡¨¥ ¤¤¨¡¦¢¨¦§¢ª¦¥¦§ §£ª¡¨¥ §¨¨¤©¤¨¥¨¡¨¡ª¦§¡¨¤¨¨§¤¬¢¨¤¨¤¬¤«¥¬ªª£«¡¨¨«¥¬§¬¦¨¨©¦ª©¨¥ª¤¬¨ª§©¤­¦¦¦§¥«§¬§¬¥ª¨«¥«©­¥®¨ª¦®ª«©ª©­ª¬§®¨¯©«¦¬ª¬¦¯©­¨®­­¨¨«±©¯§ª­°©¯¬ª«°¨®¬¬¬®ª¬¬­¬®¨¬¦¬¨{ qq~fl]~i[t`OoWMnUMfQMdUUluw·ß§¤ä¬³ê«»ï®Áó³Ãõ°Èð³Éõ³È÷¸Åö¸Ìô¬Èç§ÀÍ¶´©³·³¸¿ Ä¥Ê¢Ì©Ó­Ö¡±Ü¡³à¬¶ç¯·ê³½ð³¿óºÃ÷¾Éö¾Èú¿ÌùÂÌúÁÎúÀÐúÀÌú¾ÑúÁÒúÂÎúÀÐúÃÓúÄÓúÄÕúÄÕúÆÕúÈØúÆÙúÅÙúÇÜúÆÛúËÜúÅÛúÈÜúÌÝúÊàúÉÞúÊâúÍßúÌáúÊãúÊäúÌãúÊâúÎäúÑåúÐåúÐäúÎåúÊàúÌàúÅáúÅÜúÆÙúÇÛúÂÞúÆÛúÆÙúÄÚúÇØúÂ×úÁØúÃØúÅÖú¾Óú»ÒúºÐù¸Ì÷¶Ðø¸ÎùºÍøºÐùºÎú¹Ìú¿ÎúÆÏúÂÐú¾ÔúÃ×úÃÓúÀÔúÁÐú¿ÒúÁÔúÁÓúÄÓúÁÓúÃ×úÀÓú¿Óú»Óø¹ÐóµËòµËð¶Åí²Çé¯Ãç­Ãë¯Áî¬Áï³Ãñ¯Âï®Äó¶ÃðµÃó´Äó·Åö·ÈøºÊ÷·ÊúÁÍú¿Êú¼Ðú»Îú»Îú¿Íú¼Îú»Ñú¾Ðú¾ÎúÀÓúÂÒúÅÓúÅÛúÆØúÈÛúÉÜúÄÛúÈÛúÅØúÃÚúÈÖúÃÖúÀÕúÁÒúÃÕúÂÓú¾Ðú¼Ð÷ºÐõ·Ìô·Ìó¶Éò³Æï³Ãì³Äê¬Âê®½ä¯¿ã¬»å¯ºâ«¾ß­¹Ý¨¸Û¦µÖ¤´Ö¢³Õ®Ì¬È©Ã¤»¡·±®¦¡toqtkk{{b~~bz|iuz_xq_x|_ozbwzbzkuo|w{~¨¬¨x]bQxSKdI?`MF`QKYSK_OI]SO_QQ_SSd[QbOO_QBbOI]WO_MKbUKbUKbSK`SDd[FbUIg`[kofuliz|w||~z~  ¡¢¡¢£  ¡¥¡¥¢¡£¤¡§¤¨©§£§¦¥¦¦¥©¦¦¨¬¦¨¦©§¨ª¬¨ª¨©ª¬©®¬®¬¬¬®­®¬®­°®¯²³°´³²¯¯­³³µ³°±¶²¶µ³´¸³´´¡¸ºµ´ ·¶´µ ´±¸³´··µ¶³³¶ ¸³µ³µ´µµ·³´µ¡·µ´´¶³¶´µ²µµ¡´²µ³µ³¡³²´³´´µ³´±µ¶ ³¯³²¶µ ´· ³°³²·³¡¯°µ³´±¡µ¯µ± ³µ¡³´±±´²³±´±³±°¯±²®³µ³³±²¯´°¯°°°³°³¯´²·°¯²³­µ±£´³³­³±³±°®³¯³¯³°²®³¬±²¯®²¬³®³³±­±«±­¯¬¯­²¯®­²¬®°³¬®®²®±°®¬¯®²¯¯¯°ª­¬¯¯±¬¬¬­®­¬³¬­­±«¬¬ª¬®«²©®©¬­­«­®­¬®ª«®¬¬¬¬¬¬¬©­¨¬¬¬ª°¬¬ª¨ª­¬­©®~|~|z~~|z~|~   ¡¡¢¤ £¡  £¥ ¡¦¥¡¡¡¡¡£¢¡¡¢¤¢¡¤¢¥£££¦¡£¤£¡¨ ¤¡£¡¡¡¦¢¦¢¡¤¤¡¤£££¤¡§¢¤£¥¢¥¡¢¢£¡¦¢¡££¢ª £¥¥¦§©¥¦£¨¢©¥¤£§¥¤£¥ ¦¤©¥¥¨¦¤¦¦§£©¢«¢§¥ª ¨£¥¡¨¥ª©ª¦¨¨¨ª¦¢ªªª¥¥§©§¬¦§§¨§¬¥©§«¦«ªª©§¡¬¢udzg~_qU~gUxfKoSFgQ?bQ=[UD[d]q{Î×¥á¦°ë©»ó®Áñ®Âó®Æò²Æø·ÆúµÇó«Æê¿Ò³³¬¯³²~µºÁÆ¤É¤Ì«Ò«Ú®Ý°Þ©µã¬¶ë³¼ð¶Áñ¸Áó·Ä÷·È÷¾Çù¼É÷ºÉú¾Êú¼Ïú¼ÏúÀÌú»Ïú¿Ïú½Îú¾ÐúÀÒú¿ÐúÃÒúÂÖúÃÖúÀÖúÃÖúÁØúÅÕúÃÛúÄØúÆØúÄÛúÉÜúÈÝúËÜúÆàúÅàúÆßúÇàúÌßúËâúÇâúÅáúÄßúÄÜúÁÙúÁØúÁÙú¾ÙúÁÖúÁØúÁ×ú¾Øú¾Øú¾ÓúÀÓú½Õú¿Óú¾Òú·ÒúµÎ÷·Ê÷µÈö¸Ë÷²Êö¶Éö°Çù·Êú¸ÊúºÎúÁÍúÀÒú¾Ðú½Ïú½Ïú¼Ôú»ÓúºÍúºÒú¼Ñú¾Ñú¾Óú¼ÒúÁÐú¼Ïú·Ïõ³Êò²ÊîµÈï®Äë®ÅèªÁé«¾ìªÀè¬¾ì¬Àí®¾ï¬Ãê¬Âê±Ãî¬¿ñ­Àð³Ãö·ÄõµÆöµÃø¶È÷·ÈøµÈø·Çú³Çú·Ìú´Êù·Ìú¸Ìú¸Íú¸Ðú½Îú¾ÒúÁÕúÃÕúÁÔúÁÕúÀ×úÀÒú¾Ôú»Ðú¾Ñú¾Òú½Ðú¾Ðú»Ðú·Ðø·Ìö·Éõ°Èò²Æð®Ãí¬Áë¬»ê¯Àç«Àãª¹ã«»á¨»ß§¶Ý¦·Û¤µÖ ±Ö­Ó²Ì«Ë§Å¥Á¢¾·°°{¨z¡wrrgfkYz]{|]uwYuw[qrUrtQnoWnuWg|[t`nltq||ª°¬xgQzS?lI5_D5UI=YI=UIBQK?YMFUS?_MFWO=]MD]M?]O8YK?UMBYQ=YM?UUB`O=[S?_QD[]QdkWnobnzqtrwtutwtwwwzzz|z{x|||{|z~||¡¡¤£¤¡£££¡¢£¥¦¥£¢ ¦£¤¥§ §§¦©¥ª§§¬§«¬§¬­«««««¬®¬­®®¯¯¬°°®±®¬°³²°¯³±³³¯¯³°°²²±³¶²°°²²²¯±±±°²²°³¯²²¬°²°´°°²¯­¯¯²­±¯³²°°±¯²°®°¬³±±®²®¯°®³°­°±­¯°®²°®°®°­¬°±¯±®®§®³°­°¬°§°¬­®°¬¬°¬®¯¬°­­®­®±¬­®±¬®®¯­«­¬¬®¬­¬¯«¬®®­®«®­¬®®®¯«¬¨«©®¬¬¬¬¬¬¯¬®°«®«©®¬ª¬¬®¬­¥ª«¬«¦©ª«««®§««ª­ª«¬¨««¨ªª©¬¥¨§«©ª©¨¦§¦©¥§ª§¦©¨«§©¦§§§§§§¨¥§©©¨¥¨¦§§¦§§¨§ª§©§§¦¦§§¦©£ ¡ ¢  ¢  ¢ ¡¤¡ ¡¢ ¤¡¡¥£ ¤¥ ¡¤¥¤£¡£¦¢¦¦¤¡¢¤¡§¤¨¤¡¢¦¡£ ¥ § ¢¦§¥§¢£ ¦¤¦ ¤§¦¡§£¨¢§¢§£¨¥§¤¥¢ª «¢¥¥£¦¨¤¤¤¥¬¡©¥¬¤§£§¡¨¥¨§©¤¥¡©¢«¥¤¥¨ ¨ª¬¦¬£¬¥©ª«¤«¤«¤©§¬§¬¦§¤¬¤ªª¬¢¬¦«§¬¦©¦¬¦¬¦¬¦¬§¬¥¦¥±ª®§¬§­¥ª¦©¦­¦­§¬©¬¨«¨¬¥²ª¬¬®ª­¬«¬°ª­­°ª¬¬²¨®©«¬°¨±§¯ª¬§¯­­¨®£¬¢§¤wuiqkr]~iWt[QrYMiSKfYM`[Wn|xw¿×£ç¨­ò¬¼õ­Ãô´Â÷¸Êú¹Íø¼Ìú¹Îú±Ëï©Æ×¸¸°µ§·¡´ººÁ¤È§Ê¬Ò­Ó¡±Ú¤²Þ§µâªµã±»ë²½ñºÅô¹ÈõºÉö»ËøÃÊúÃÌúÁÓú¿ÐúÁÏúÃÑúÃÒúÃÓúÁÒúÃÓúÄÓúÃÒúÆÔúÉ×úÈÙúÇØúÆØúÈØúÈÙúËÛúËßúÆÞúÉßúÎÞúÎàúÍàúÎßúÐâúÐâúÍàúÌäúÌãúÎæúËâúÍâúÈßúÆßúÄÛúÆÛúÂØúÃÜúÄÙúÆÝúÃÙúÅ×úÃÛúÁØúÇØúÆÖúÂÖúÁÒú¹Òú»Ñù¼Òù½Ïø¹Íõ·ÊúºÐú¼Ðú»ÐúÀÐúÁÐúÈÓúÆÕúÁÚúÃÒúÆÕúÃÓúÁØúÃÓúÂÕúÃÖúÅÒúÈØúÅÙúÅÕúÃÕúÁÓù»ÑõºËô¹Îô¶Éò¶Èí±Çí³Æð³Åð·Æï³ÆïµÃó´Æî³Ãì´Äï³Åï³ÆòºÇõ·Èõ·Èö½Çõ»ÊõºÉ÷¸Èø·Êú»Ìú»ÎøºÊú¼ÌúºÍú¼Ëú¼ÓúÁÓúÁÒúÇ×úÆ×úÆØúÈÛúÅØúÂÕúÁÙúÁÕúÁÖúÅÒúÃÕúÃÒúÁÒú¼Òú»Íø»Ì÷³Ìô·Æó´Èï³Æë´Ãí¶Ãì³Áé°Áè³¿è«Àå¬»ß©»à§¹Û¤·Ö§²Ô¤´Í¯Î«Ç¨Â©¼¡·¤±²­£~wunof~n|~gxxf|zkz{_wu]uzdwzbxgwlwz~§³¶¬gnOMKqKKfMF]KK[QMWOI]SD]QQ`WObSO`WKbSOdSMdSK[SK_QMdSI`SQ_SKbWO`YMfb[gfdnqbuzr|wz~{z~||| ¡¡¥¤¡¡ ¢£¥¤¡¥£¡¡¦¢¨§¥¦§£¨£§¤¬¦«©§¥¬«¨¨«¨®©­ª¬¬¬©¯¬¯±°¯³­®®°´²±­´³°³³¡²´ ·µ´µ¶´³´ ·³ ·³³µ·²¶¶¶®¹³ ¶´£´³¤·°µ³¶³¡¹³ µ´µ³µ³·µ ²³³³³³ ³³³­ ¶³¢·´³¯µ±³± ³´·´µ³¡²¯·³ ¶´ ³³·³·´ ²³¢¶²³±´²³²³¯²±±°·³³³ ³°´­³­±°³¯µ±²­±²²³²¯³°±°¡³±µ®³±±¯°±³°®°´¬¯±±­­­³±²¯®¬°¯³°¬¯³­³®±®´¯±°°­²«°¬¬­¯®¯­¯¬®«²®±¬°¬±­°¬¬«³±­¬®±­¯°®®©°­®«­ª­«°¬®¥¯ª¬¨®¬¬©«ª±©¬¬®¨¬ª¬©®©ª«®¨¯ª¬¬¬©²ªª««¦¬ª«¯¬§¬©«xzz|z|~|~~|~~¡ ¡¡  ¡  ¡£  £¡¡£¡£ ¡¡¢   ¢£ ¥£¡¢¢¢£¢¡¢¦¢¥ ¡¡¥¡¦££ £¥¤ ££¥¡§£¤£¦¥£¤¥§¡¦ ¨£¦£¢ ¦¡¦£¨¡§¦§¨¥§¥¦¡¨¢§¥¨£§£¦¢§¥§§¥£¦§¦¥§§¥£¤¤¥¥ª£¨£©¥§¥«¦¦¥©¤¨¥©§«¦©¦©¥ª©§§©¢©£¤¥§¥zonluftU|bSr_OnYDgI=_K?YU?`fdi®Ðá©é ³ð¥Áô¬Áö°Ãù¯Åø³Êø²É÷ªÄï¤ÃÒ¶·ª°¯³³¸»Æ¡Ë¥Ð¦Ó¨Ö¬Ü²ß¢µà¦¶ç­¸ì®¹ï³¾ñ·Áö¹Äõ»Æø¼Çø½Çú»Íú¾Ëú½Ìú¿Ìú¾Îú»Ìú»Ðú»Ïú¾ÒúÀÓú¿Ôú¾ÑúÃÕúÃÔúÀÓúÃÕúÃØúÆÙúÈÖúÆÛúÇÜúÆÛúÆÛúÊÜúÇàúÊÝúÈÜúÈÝúÈâúÉÝúÇßú¿ÛúÃÛúÁÙú½Öú¾Ôú¾ÖúÀÖúÀÕú¾Óú¼ÕúÀÒúÁÒúÁÕú¿ÒúÀÔúºÍú»Îù·Ìö·ÎöµÊ÷¶Êö³Ìõ·Ê÷·Êú·Ëú»Ëú¾ÊúÁÎúÂÒúÃÖú¿ÒúÀØúÁÑúÁÒú¾Õú¾Ñú¾Ñú½ÔúÁÒúÁÓúÁÕúÀÕú¾Òú»ÒùµÏù·Êó³Êó´Éï±Âî±Áë³Àï¯Áï²Áì­Âí±¾î­Ãê«Áé¬»é¬»è¬¾ê®¿ò²Áï³Áï²Ãñ¯Ãñ°Äó°Åô´Äö·Ã÷µÆø²Çø³Èø´Êú´Ëú·ÊúºÌú¹ÊúÁÏúÀÒú¾Ñú¾Òú¾Òú½Ôú½Ïú»Îú½Îú¿Ðú»Ïú»Îú¹ÌùºËö·ÉõµÊõ´Èó¯Æï¯Âì«Àì¬Áè­½è®¼æ¬¾ã¬½ä¨ºà¥·Þ¦µÙ ´Ö °Ñ±Ò«Ê«È¥Ã¦»¸µ­¬¬|¡uqqlk~bw~]x~_xx[qw_tt[utUntWnqUqx[kdodtq| ~|­±³®xU]BuK8d?8WI=UI?SI:UM?UOBYM?]SF[SIYQD]QI[KDYM:[M:UO?YQD_O:[UD_Q=`QD`[UbkUniftzowkqutqwuuwquzxww|wxw|xzzx|zz||~|| ¡¦ ¤£¢¤¥§¤¤¢¥¡§¨©©¨ª¨§«¨§¬ª«¬¬««°­ªª¬¬¬¬®®®¬±°«®°¯¯³®±±°³­²²²­³°°¯´°³°¯´³°±²³²±³³¬±°®±³±¯±®®°®±¯±­³¬±²¯¯°°²¯¯±³°³®²³¯¬²®²²°®°°°±²¬¬¯­°°²°¯®°¯®°²°®®°¯®°®­°¬¬±®¬¬®¬®¯­­­¯®±¬®²¯¬¬¬­®¬®®±®®¬²°®ª«®­¬¬¬©¬¬­­¬­«®«®¬®©©««®ª««¨­¨¨«¬¨­¬¬¬­§«¬«¬©©­§ª¬«ª¨­¬¬«ª¬©ª¬©¦§¦¬§©©©©¨§§¨§¥«¤§§©¥§¦¥¦£©¨¥¨¦¨¦§§§§¥§«¤¦§¦§ª¦¨«©§¨§©¦¤¥§¦¬   ¡¡ ¢¡£¢  £¡ ¢¤  £ ¢¥¤  ¢£¦£¢  ¥¢ ¥  ¢¦£¤¤¤¥¡¤ ¢§¢¡¥¤ ¤ ¤¢§¥¡¨¡¦£¥ §ª¡ ¥£§¨¥¨¢¦ § ¥¢¥ ¥¡¨ ¦¥££¨£¥¡¨¢§¡©¢«¦¨¢¦£¦£¤ «¡«¢¥£§¢©¤§¡«¨£ª¡¨ ¨©©ª¥§¡«¡¨¦©£§¦¨¨¬¨©¦ª§«¢¨¤¬§ª¦«¤«§ª¤ª§ª¨ª§«¦ª§ª¤¬¨¬§¬¦®§¬¨«¦®¤¬©­¦««¬©­©¬¨¯¬­«®«¬¬«©¬§°¦­ª¯«¯¨­©ª©°¨®ªª¦¬£©¤¤{xzowftbfUx[OrUOfOOdSQgdbnÐæ¡ªð§¶ð«Áõ±Áú³Éú¸Ìú³Ðú·Êú³Êö¨ÆÝ¿Â±³§³ ´·º½¢Ä¤Ì©Ð¬Ö¡±Ù£°Þ¦·ß§¹æ¬¹é±»í³¾ð¸Áò»Æô»Çø¿ÇúÁÎúÂÍúÀÎúÂÐúÃÓúÅÍúÀÐúÂÒúÁÓúÄÕúÅÒúÄ×úÆÖúÅÖúÇÙúÆØúÈÙúÆÚúËÙúÌÝúÌßúËáúÌáúÍÝúÎáúÑãúÍäúÏäúÎßúÌáúÊàúÉÞúÆÝúÈßúÃÛúÃ×úÀÚúÄ×úÆÖúÂØúÃÖúÄÙúÄÖúÃÖúÄÖúÄÓúÅ×úÃÕúÂÕú¿ÓúÁÔú¾Òú¾Ò÷»Ñ÷»Ïö¼Íú¿ÎúÁÏúÃÏúÂÓúÈÒúÈÖúÌ×úÈØúÈÚúÈÕúÅ×úÃÙúÃÓúÄÖúÅÕúÇÔúËÕúÆÝúÅ×úÄØúÃÓúÁÓú¼Ð÷¼ÐøºÐô·Èñ³Èñ·Çñ¶Ãñ¸Èð¶Æñ¹Æó¶Æï´Ãî±Âí¯Åê¯Æì·Ãò¶Æï¶Ãò·Âð¶Èï²Äñ¶Æô¹Çö¹Êô¶Ç÷¶Éø¹ÈùºÉø¶Êú»Ìú¾Ìú¿ÒúÁÑúÂÒúÄÓúÂÓúÁÖúÁÔúÃÕúÁÖúÁÓú¿ÓúÀÓúÀÓúÁÎúÀÏù¼Ñú¼ÌøºÊòµÌó·Çð±Åí³Åê°Àí±¾ë±Áç¯¿ä«½ä¬»ß¨·Ý¥·Ù§¶Ô¦µÔ ²Ë¬È«Ä¨½¦¸¶³¬«¡|{zoqo|k{izix{fzx`zxbrw`tuiq~fzlwr~¨±µ¶«z[[OuQBiOK`KKWII_QK]QO_QQ`SQdYQb]QdSMg]ObWSfQQfUK]OM_QQdUObQM`SQi[Yfngqk`uto{w{z{w~|{~{zzz|~~~  ¡¥ ¡¤¢¤¢¡ §¢¦¡¤¥¦¢§£¤¡¨¦¬¨ª¨©¨©««¨¬¬°¨¬¬ª­°­¯®¯¯²±°°¯®³±±±µ±´®¶¶´³µ³³°¶·µ´¡µ¯³³¢´±·³¡±µ·²´³·³ ¶¶ µ²¹µ µ°¡µ±µ³³µ´²´¯´³µ³ µ´ ·³ ´³µ²³´¶± µ²³³³²³± ³²¶µ µ²´¶³³µ³·² ²±¶°²µ¶¯µ³³¯¶°³°°¯³°±°´°°®±°µ±´°³°³¯¯²³±´­±¬²¯¶±²¯¯®³¯³¬±® ³¯³±±¯¯«³²¯®³®±¯°®±®¬­®®®©²®¬©¯«­°®¯­®¬­±¬¯¬¯«®®±¬®¬¯¬°ª®®®­¯¬¬¬±¬¬«­¬¬¬¬«¬«­§¬©®¦¬ª­ª­«¬§­¬¬©®¨­¬¯¬¯©°©¬«¬¦ª¬©ª­¨«©¬§©«¬||w~~~~|||~|{|x~~~~ ~    ¡  ¡¢£¦¡¤ £¢¡¢¤¡¡£¢¡¢¡ ¤¢ ¦¡¦ £¢ §¡£¤¦£¥¨£¢¥ £££££¦¡¥¡§¤¤¦¡¤¡¨£§£§¤¥¡¤£¤¢§ ¤£§¢§¤¦£¦¥¦¡¤¤§¥¢§£¨©©¡©¤§§©¤ª£¨§§¥¨¥¨£§¥§¥¨¥¨§§¨©©§­¡«©¨¥¥¤¨§§¤ª¥©¥¨¦§¤¤§tttn~f~U|dOxQFoQB`S?[UDb[MdtwÇÝ£ä­ð¢·ô©Á÷­Âú¬Æú­Êú®Ç÷¬Æö¤Äà»Æ¯°¥±²®¹½ÁÉ£Î¢Ñ¨Ö°Û¯Ý ´Ý¤·æ©¶è¬¹ê®¾î°Áñ¸Áõ¹Ãâ¾Ãø¹Ì÷»Èù¾ÉúÀÍú¾Ðú½Íú»Îú¾Ðú¾ÐúÆÏú¾Ðú¾ÒúÀÒúÁÖúÂÓúÁÔúÃÖúÄÖúÆÙúÄÚúÊÛúÈÙúÆÛúÆÙúÈÙúÌÝúÅßúÃÜúÆÛúÃÜúÂÝúÀÙúÀØú½Ûú¾Øú½×ú¾ÖúºÒú¾Óú»Òú»Ðú¼Îú¾ÒúÀÐú»Òú»Òú»Ðú¼Ñø·Îù½Îú½Ìú¼Îú¸Íö¶Êø¶Íú»Ìú½Íú¿Ìú¾ÏúÄÑúÅÓúÇ×úÃÕúÀÕú¿Öú½Ðú¾Óú»Òú¾Ðú¾ÑúÃÒúÃÓúÄÔúÁØúÁ×ú½ÓúºÔúºÐ÷¹Êô´Èô³Çò³Âð°Àï°Ãí³Äï®Áî¬Áï±Ãì­Àì«Àé¯¾é­½é°Áî²¾í­Áì¬Áë­Àì®Áé®Àè¯¾ì®¼ò°Âñ²Áô¯Ãö®Æö²Æö´Äø²Ê÷µÊú¹Îú»Ìú¾Ìú»Îú¿Òú»Ïú»Îú½Ðú¼Ðú½Ðú»ÌúºÎúºÏú¸ÌõºÊ÷µÊõ®Èð®ÆîªÁì­ÁêªÁæ«»èª¾çª¾æª»à©¸à¢·Ù¢µÙ¤°×°Ò¬Ì¬Ë¨Ä¥Á¢¹·µ°­z¨w¡zqlgfbx]zz]zz`ww]qxYntSqr[o|Yk~]nfwkw{ª|±±¯{dnBzF=dI=]B5YO8UD:MI=SMFUODUUD]YI_YD]UD[S?YUD_S=]I=]UBWU?WS?`SDYQF_]QdfYon]rtgwwl||koko~nrnqqttotttuotwwtzuqwzw{x{z~zw{||z|¤ ¡¢¢¢¥¢¦¡¥¥¤¨§¤©§ª¨§§¨¨«««©¬©¬¬­¬¯¯±±ª®±¬°®®°¯­°²³¯¯°°°²³°°³²¯®²°²³±´°®°²±±°°±°°±±®°°¯³°°µ±®¯°²°°±²°®®­²±°¬±­«°¯°°«¯­°±±­®­«¯­²¬¯°®°²¬®®°¬¯­­­¬­®®«­®¬®«±¬®¬²¯ª¬¬©°®¬«±®²¬®«¬«®ª«¬¬««ª¬­­«­¬¬«¬¬®®¬¯««¬¬­®¬¬¨¨©«¨©ª¦®¬§©««®ªª¬«¨ª¨«ªª¥¬«ª«ª©¬ª­ªª¨ªª«§©©¬©¬©©§¬§©¥¨¨¨©§¨©§¬§¨¥¦¦¥¥©¥§¤©ª©¦§¦§£¤¨§¥§¨¦§§¦¨§¦¤§£§©¥ ¡     ¢¢ ¡£ ¡¢¡¡¡ ¡¤¢ ¢¡¡¥¡¡§¡ £¤££¢¢£¤¤¤¡¤¢¡¢¤¡¤¥¦¤¡¤¦¡¤¢¥¡¦¡¦¡£¢¦¡§¢¥¢¨¨£¤ §¡¨§ ª¢ª§ ¨¤§ª ¦ ¨¦¤§¡§¤§¡©¢¤¤¥ ¨¢©¡§¢¦¢ª£«¤¨¦©¡­¡©¤©§¨¤¬¦«¤¬£¬¤§¨¨¢©¥§¤¬¤¨¤¨¤«¢§©«¢¬¥©«©¦«¦«£«¨¬¦ª§¬¤«§¬¦«§® «¦¬¨¬§¬§­§¬¥¬§®§¬¬¬©¬©¬¨¬¤ª©­§®¦®¨­©­ª²§­ª­¦®¦®©ª£©¤§¡{{x|dk]dQxWOnUSfUOf[Sk{uz¼Ü¡å¡¬ð¦ºö­Áú¯ÉúµÊú¸Ìú¸Ìú¶Ðö¯Êê¡ÁÕ¶µ®³¢´³ºÁ¡Å¥Æ¥Ò¬Ö¡¬Ø£±Ý©³áª¹á«¸æ¯¼ê³¼ï´Áñ¹ÆòºÂô¾ÆøÀÊø¾Éø¿ÎúÀÎúÂÎúÁÓúÃÐúÂÒúÂÖúÃÕúÅÓúÆÕúÆÖúÈ×úÈÚúÉÙúÆØúÇÚúÈÝúÎÛúÊÜúÊßúÍàúÌÛúÌßúÏàúÎßúÌãúÉàúÈßúÇàúÆàúÆÝúÃÜúÅÛúÃÛúÁÖúÁÖú¾ÕúÂÕúÂÕúÂÓúÁÑú¿ÖúÁÔúÃÖúÀÓúÂÒúÀÕúÁÕúÂÒúÅÑú¿Òú¿ÒúÀÐú¾ÑúÀÐúÃÔúÃÑúÆÕúÉÖúÈ×úÉÖúÄÛúÆ×úÅØúÆÖúÂÖúÁØúÁÕúÂÓúÆÖúÈÚúÊÛúÇÜúÄÙúÆØúÃÖúÁÑú»Ðù»Îö»Êõ·Éò¶Çò»Èô»Æò·ÈñµÄò·Åò¶Èï³Çì³Áë·Ãí¸Ãð·Áî²Ãë³Âê²Áë±Ãë³Àí³Àí´Ãï±Ãï´Æó´Äö¶Èö¶Æö¶Ç÷¸Ëú¼Ëú»ÍúÀÑúÁÒúÂÐúÃÖúÄÕúÅÓúÃÐúÄÕúÀÕú¾Õú¾ÐúºÐú»Íù»Ì÷»ÊôµÊò³Æò³Äî³Åï®Ãë±Âê³Áé°¾è±¿ã¬¾àª·Ü¨·Ùª¶Ö¡³Ô³Ð­ÇªÁ¨¾¦¾¡»·³­¨£xuool~f~gzbzzizwbuz_uxguzbukwo|||¤®³³©|dbBrFQlMF`ID_SF]KK[KK_OQ_UU_YS_[Sf]UiWQfUObWQdUM`SIb[S`QMbUObWS`YUlnbnoitqlxzruwuwxwwxww~zz{{zz{z{~{~|¡¡ £¡ ¡¤¢¤£¦¥¥¤¤¦¢¨§§£¤¤¨ª¨§¬©«¬¬§¯¬­­¯ª­¯®¯¯°°® ³±°²³±µ®²®³±³µ´³¡·¶¡²³µ³³³ ³³³³ ¶µµ³¢¶·¡²µ ¶±´µ ·³ ´³·³¡·³´µ ¶³³¶³¯ ¶± ³³¡±±³³¶³¢³¯µ³³³³°¶³¶° ´°²³·³³²µµ´³³²²° ²³µ±°¯³°³±°°³¯±°°°±±³±³°¯¯³¯±°³®³³°¯²­³°³¯³²´° °­³°¯°³°³®°¯±¯³±³®¯¯³­³­¯®¯¯±¬²¬®¬®¬±®¬­¬¥®ª³­±ª¬¬¬®±«®®­¯°ª®­¯¬­«­©¬¬¯¬°¬°«¬­°ª¯¬ªª¬«¬¥ª©¬©«¨ª¨¬¦¬©¬ª«¨¬¬«ª¬©­©¬§«ª¬¬°¬¬©¬¬¬«¬©¬||{{{~|z||~~~|~{~{{|z|||~¡ ¡£¡£¤   ¡¡¡¢¡¢¡¡¡£¢¤ ¡¢£¥££¢¥   £ ¤  ¢¥¢£¡¢§£¥¦ §¦¡£¡¤£¢£¢££££¡¡ ¤£¤§£¡¥£¨¡§¡§¡¥¢¤¦¥£§¡¨¥¦£¤£¤¥¨¦ª¢¥£©£¥¦¨£ª¢¦¤¨§«¥¦¤§¦©§¦¤¨¦©¦ª¦©¥§¦¨¥§¥ª©¨¦¦¢ª£¦¢¤¤¦ £wo{k~foS`FtS?iS?bQB`S?_i_nw|ÏÝ¥è±ó¥»ô§»ù«Ãú´Æú³Êú¶Èú°Çì ÂÙ··¬¬|³±±¼Á¢È¤Ì¥Ð§Ô¬Û®Ü¢²à¤¶ä¦¸ç­ºç«½ì®ºî°Áñ´Ãð¶Áô·Á÷·È÷ºÇù»Ìú¾Çú½Ïú¾Îú¿Ìú¾Ðú¿Ñú¾ÏúÁÒúÁÏúÃÕúÃÕúÁÙúÄ×úÄØúÃÚúÇØúÇÙúÊÜúÆÙúÆÜúÉÛúÈÛúÃÚúÄÛúÁØúÂÖúÀÚú¿ÕúÀØú½Õú»Öú»ÒúºÐú·Îú»Ðú»ÏúºÌú»Ðú¼Îú»Îú¾Ñú»Òú»Ðú¼Ðú»Ðú»Ëú¼Îú½Ìú¸Îú¸Ïú»ÐøºËú»Ìú½ÎúÀÐúÁÐúÅÔúÄÖúÀÕú½Ôú½Õú½ÓúÀÔúºÓú¾Òú»ÖúÀÓú¾ÖúÁÐúÀÕúÁÖú½Ñú»ÒúºÌù¹Êø¶Êô±Çô´Äô´Ãð²Ãï¯Áñ²Âî²Âñ°Áì¬¿í®Áí«Áì±¾ë°Áë°Àë¬¿ä°¾à©»å«»æ¬»ä¨Àâ©»ã«»é«¾ë­ÁïªÁó®Áð­Áõ³Çö³Ç÷·Éú·ÉúºÌúºÎúºËú¾Òú»Ðú¼Ðú¼Ïú¹Ïú¸Ìú¶Íù¸Ìú·Èø´Çô³Åó°Æò®Ãí¬Âì­Áí¬½è©¿æ§ºæ«¼ä©»â¨¸Ü ·ØµÕ¬Ö±Í«É¨È¤À¥»¡º·°®¬¤x¡rqkgb~Yx[{zYtw]txUoqYrqSquUlu]o~_tlwqx|¬®«z`oIwK8gD5]I?SI5SF:YI?UO=SMBUUFWUDWYD`QI[_B`MB[W?[MD]M:[U=YSBYQB`SD_bUYlYol`nxdxuk||i~zk|n|i{|l|nzkkn~lq|ooqrqkrnrornwtutxwuxwuutu{u{xz|~|{||~~¢ ££¢¡ ¥¢£¦¥§§¡©¨§ªª©©ª¦©¨©©®¬¬«¬­­±°°­¬±®®±¬¬°®°°¯²²°¯°¯³±¯®®³³®°°´¯²±±¯°²±¯°²³³³°²°°°®¯²¬®®²±¯¯¯®±®±¯±¯±®±¯®°°±°­°¬®°°®¬¯®®°®«¯®­¬®¬ª­°­­°°¬­¬¬®¬¯®¬©¯­¬®­®®­­°©°®«¬°«¬¬©­«­©«¬¬­¬¬¬¬«®¬««¬®¬®ª¬¬¬«¬¬¬¨®««««©«©««©§¬¥¬¨ªª­§©««­«©ª©ª§ª¬©«©©«¨¬ª¨¨©ª¬«§©ª©¬¤«¥¨¨¨©ª«§ª©§§§¨¨¥¨§¤¤©¦£¨§£¦¦¥«¨©«ª¨ª§©¨£§©§§§¥¡ ¡ ¡¢¡ ¢¡¢ £ ¢¥¥¢£¡ ¢¡¢¦ ¡¥£¢¥¢£¡¡§£¥¡¥¦¢¤¡¤¥¤¡¥¦¦ £¢¦¤¦§¤¡¥§¤¢¡¨© ª¨§ ¥¨¦¤ª¡« ¦¦¢§§¨¡§¢¦ ¨¥ ª¤« § «£©£¡§¤¬¡«¡¨¡©¤¨¤©¢«© ¨¢¦¥§¡ª¥¬¡ª¢©¦¬¢¬¦¬£¬ «¥¬¢¬ «¥ª£«¤­¡¨£¬¥­¨®¥¬¢­¦¬¥¬¢¬£ª¨¬£¯¦¬¦¬¨«¦­©ª¥©§®¨®¢¯¥¬¦¬§­¨®¥®©­¥¯©¯©­¦®©®©­§®¨®§®¨¯¤¬©«¦®§®¦¬§¯ ®¦¤¢wnzfi[_QwUOoWMlOOf[YowÁÕ¡ä°ð©»ô­¼ø¯Æú·Èú»Êú¼Îú»Ëõ®ÆãÁÁ²¬©²¡¶ ·¾Á¡Æ¬ÎªÒ£°×´Ø¤³ß¥¹äª¹å®»ê±¼ë°Ãí·ÄðµÃð¹Æó»Å÷¾Èú¾ÌøÁÍúÁÎúÁÎúÀÒúÃÑúÃÕúÄÕúÅÓúÆÖúÈØúÆÖúËÚúÅÜúÇÜúÊÜúÇÛúÈÞúÈÜúÌâúÌÞúÌßúÎàúËàúËàúÊàúÇàúÄßúÅÝúÅÝúÈÙúÃÛú¿ÚúÁÙú¿Ôú½ÓúÁÕú¿ÐúÁÒúÁÓúÂÒú¾ÒúÂÕúÆÕúÃÕúÃÒúÅÕúÂÖú¿ÖúÃÒúÁÓúÁÔú¾ÒúÀÓú¾ÕúÀÓúÂÐúÃÕúÈÖúÊÖúÆÚúÃÛúÅÙúÃÚúÁØúÅÕú¿ÖúÁÓúÃÛúÂÖúÂÚúÈÖúÁÙúÆÙúÃØú¿Öú¾Òù»ÎøºÌö¸Êö¶Éö´Ëñ´Æó³ÇóµÆðµÇò´Çí¶Ãð¶Æî³Âï¹Áï¸Æí¸Åî¶Æç³Âé²¿ãµÂé²Äç­Áæ­Áç¬Àç®Áî²Åï³Àñ®Æô³Æõ·Åö·Ê÷·Ëú»ÌúÀÎú¿ÐúÁÐú¿Òú¿ÒúÂÕú¾ÕúÁÕú¾Òú»ÒúºÎú»Îù¸Î÷·Ïô´Èô°Ëï¶Çí¯Ãí¯Æë³Ãé®Àè®¿æ¬Áà§»à©»Ü¥¼×¡³Ó ²Ð¯Ë®Æ¦ÂªÀ©¼¥¼£·¯±¨ wwno{ilg~wd{z`{{dxw_{xduizix¤©ª l{W[OxIKiDF_KQbKD_FI_QO[QO`USbSSdUQi[[k[UkbUlUMl]MiQQiSKiYMgWObWKiUSli`nlbwqlzzu|n{o~xqu|t|x~uurwut~wuuqzxwwz~z~xz~z{{z{|~ ¤¤£¢¡¥¡¦ ¤§£¥¦¦¤¬¥¨««¦¬ª¨©©ª°©±¬®¬¯¬³¬¯«³­¯®³²´°³¯µ±µ³´²¸°³° ·²¶³³µ ¸³µ³¹´¸³¡¸³µ³µ³µ´·±¡¶³·´·´ ¶²¢¹²¶³³¯·±³±¶³´¯´³³²·°³±³¯µ­²¶³°¸²³´´³¶® ´¯µ°¢µ°³± ´¬³¬´®¶°³¬´°´³³¬¶¬¯±³¯´®³±´­³®µ²°¯µ®°³µ­³¬±¬±²±­²¬µ­ °®³¬³¬±«°®³°²³¶ª²°®±°«³¬±¬²®­¬®¬³¯­«¯©±©°²°­³¨®¬³¬²ª²¬¯©°ª³«®¬¬©®¬°«®©°«­ª®«²ª­¨«¬¯©¬¨­¦¬ª®©­¨¬§¯ª­©¬§±«®ª¬©°¦®¨­§­§­¦°zz~z~{|z|~||||~|| ¡   ¦¡¡ ¢¡  ¡¡¡¡ ¢ ¤ ¢¥£¡¡¡¢¡¥¢ ¢¥¦¡¢¡¥¢¢¥¡¢¡¢¥¤¡¤¢¦¡£ ¦ ¥¢¢¢¡£¥ ¦¡£¤§£¥£¢£¡¤¥¥¢§¦§¦£¦¤¥¢¥¥§¡§¡¤£§£¦¦¨£¨£§£¨¦¨£ª¥§¦¥¦§£©¨¥£ªªª¢§§¦¥ª¥«§ª¦ª§©¤©¤¬££¢§¤¤£¨©¦ ©¤|wungrW~fKwYDoSDdU?dWDbbWbq~¿Üã§é³î¨¹õ«Á÷±Á÷³Äù³Áò£¿ßºÁ«¬|­°¶·ÂÅÊ¢Ó¦ÓªÙ°Û¡°à£±á©·æ§µè«»é¬¾ì«»ï±¿ï°ÂòµÅö¸Äø¸Çø»ÊúºÉú»Ìú¾Îú¾Ìú¿Íú¾ÑúÂÎúÁÑúÃÓúÄÓúÃÖúÁÓúÃÖúÃÙúÈØúÆØúÈØúÈÜúÈ×úÆÛúÅÙúÄÚúÄÙúÁÙú¾ØúÁÖú¿Öú¾ÓúÁÒú¼Òú¸Óú¶ÎõºËø»ÎöºÈö¸Éö¸Ëú»Îú»Íù½ÍúºÎú½Óú½Ìú»Ðú½Îú½Ðú¹Íú¼Îú¼Ìú¹Îú»Êú·Ðú¸Êú½Ìú»Ëú½ÐúÂÏúÃÓúÂÔúÀÓú½Óú»Óú½Òú¸Ïú»Ñú»Ðú¾ÏúÂÓúÁÑúÁÕúÁÖú»Óú¸Îú´Ëô³Çó°Åò±Áð¯¾ñ®Áï­¾ï®Àî±Àî³Áï¬¿í­¿ð²Àë²Âê³½í±¾ì®¿ç«¾å«¾æª»ä¬»ã¬¿ãª½äª»ã¨¹ã©¼èª¾ê«ºí«¿îª¿ï­¿ñ®Äó¯Åø·Èú·Êú¸Éú»ÌúºËú»ÏúºÏú»Ñú»Ðú·Íú·Ìú³Ë÷¶Æ÷µÈõ°Çò³Åð®Æí©Àì«Àç­½é¨¾ç¨»áª»á¥¶á£¶Ù¡´Ö±Ó¬Ð«Ì§È©È¥Á¢¼¢º´³®ª~¤x¡wqdkbxd{~Ywx`t~]qtUqwUrxUl{Un~_q`ul|rtuqiQ|W=nM:dK=WF0UD8SM8UD?UK8SMFSQ=YQ?_WI[WI_YI`]I`]Ib[B`Q?`YI]O:`UB_UD_UKfbWgq_onbxtgw{gz{gug{g{zgzi~kzkxk|k|n~|q|k~~ln~q~nl~lnnolqqr|tqtnuwtntxtzrt{t{{zw~{{~~~¡¢£££ ¤¡¨¤¥©©¨©¨¥¨§«®¬©¬§©¬ª«®«®««¯²¬­­­¯²¯®¬¯±¬²²°°²±±°¯®³²µ°­¯±±¯°³±°¯®²²²³°²°¯®°²²±°²²¯±®¬®²°®²¬²®¯²¬¬®¯­®±¬®±­¬¬²²¯¬±­­¬¯¬°¬¬¬­¬«¬®°®°¬¯®®¬®­©­¬®¬¯¬°®«¬¯¨¬¬¬¬¬¬®¬¬¬¬ª®®¬°««¯¬ª«¬¬«­®¬®®°ª¨««¬«««¬«§¬©«§«¨¨©¬¨«­¨¨¬«©¬¬ª­¬¬ª¬ª«¬¬¬©«­¥¬ª§©«¦«ª©ª§¨©§¨¥§§©¦§¨§¢©§§¦¤§§ª§¦©¥§§©¦¥§««¥¦§ª¥§¥©©¨¦¦¥¥¦¡ ¡¡ ¡ ¡¡£¢¢ ¢¢¢¡¢¤£ ¡¢£¥¤ ¥¤¢¢¤¤£¢¥¥£ ¡¤¥§¤¦¢¤¤¥¤¨¢¡¥¨¦§¡¦«©§©¡¥¢©ª¦ ¦¬¡¤¡¥¢¦ ¦ ¨«¢ª¢¦¢¨© ©£§ ¥¤§¤¬¡¥¨¡«¥ª¤¦ ¨¡©¤¦¢©¡¨ ¨¤ª¤§¢¨¢ª¡ª¤©¤«¢¬§¬¤«¦¬¢ª¥®¡¬¨«¤¬£§¥­¥¬¤¬¦®¥¬¦­£­¥ª«¯¤¬¤¬§¯¥¬¨¬©¬¤¬¦­¨¬¥¬¨®¨¬¨±¨¬¨¯¦­§¯¦®¨¯©¯§±©­¦¯¬²§­©¯¦¨¦©§°¥°«¯¥¬¡§¦£¡zko]dQ`QrWOlWQn[SloduzÉØ£á±è¨µñ¨»ò©¿ó¬Áô¯Àð¦½à¼Á¬¬¦¬¯µ·Â¡Ã¤É§Ò¬Õ ¯Û£·á¨µâ¨¹â¯¼é¯¹ê³¿ì²Ãï³Àò¶ÅôµÅö»Éø»Ç÷¾Îú¾Ìú¿Îú¾Òú¿ÒúÃÒúÃÓúÁÕúÆÕúÊØúÊÙúÇØúÄÜúÄÙúÊÙúÈÝúÈÜúÈÚúÏßúËâúËÚúÆàúÈàúÉÜúÊßúÇàúÃÛúÆÝúÅØúÂÚúÄÖúºÖú½Ó÷»ÐöºÑ÷»Ðú¾Îù¾Íú¿ÑúÂÒúÁÒúÁÓúÁÕúÅÖúÁÕúÁÖúÁÕú½Òú¾ÐúÂÓú¿Óú¾Òú¾Ðú»Ðú¹Ñú¼Îú¾ÐúÁÑúÅÑúÆÕúÆÓúÈÖúÃØúÃØúÂÖú¾Øú½Öú¾ÒúÃÖúÃ×úÈÙúÄØúÃÖúÁÑú»Ðö²Ìò´Åð³Äï³Ãï¯¿í¯¿î®Âî´Ãï³Àò·Âñ³Ãð´Äð¶ÆðµÅñ·ÆïºÆï³Ãê³Âê²Áê²Áç³¿ç­½ã¬Àä²¾ä¬½ã¬¿è¬¾í­Áî­Âí­Áñ²¿ò³ÈõµÈö¹Ëú»Ìú»Îú¿Ðú½Ñú¼ÔúÀÓú»Òú½Ðú¾Ðú¾Óú½Ìú·Î÷ºÐöµÊô²Æò³Åð³Åí°Ãë²Áé®Âç¯Ãç±Áåª¼Þ¥»à£¹Õ¤¹Ö²Ò¯Ì®É­Å¨¾¨À¥½£·´ ³®¨{xtnki~{f{iz{`zw_{|_xz`r~`{kzizn|t~ugzW{_MxMFkFDdOF_K?`KF]QD]FF_KK_QQ`UOf]QbWSg[Qf[WlfSkdQk[QqUKi[ObSMiSOg[Og`]ridntkxto|xo|xn|o~oxrznwnwzuwquq|rtq|qx{r~tw~orwwoxuxwwwww{z{{{~~~¡¡£¢¦ ¤¡¦ §¡§£¬¢©§«ªª©¯«¬©®¬¯«­ª¯¬°°®¬°³³²³¯³¬²±¶±³±´¬º´³´³±¹³´³´³ ·³ µµ¡¶³¶³µ° ·²³µ¶µµ±·´µ°·±·³¶²³²³±µ®¶±·®·²³®´¯¶±³±´¯´°³²³²³®µ³´¬µ®°¬³²¶±³¯³¯¯¯¯³²¯³­²¯±¯´¯³­±¬±±¶¯²°±®³¬­®³¬±­°¯¯¯³­³¯³¬³®°­°­³®³®³­³ª­­°°²¬³¯­©®¬³©¬¬±ª±­±®¬¬¯¬²­°¬³«®¬¯¬´ª°«®¬¯¬°ª¬¨®¬®««©®¨­¬ª©°¨®¨¬©¬©­¨¬©¬¨°«¬¦¬¬¬«­¨«§¬¦¬«°©¬¨®¦ª¤¬¬¬¥¬~{z|~{~~~|~x|z~{||~¡  ¡ ¡¡¢  ¢ ¡¡¡¡£££ ¡¢¤ ¤£¡ ¢ £¡¡¢¡£¡££ £¢¡£¡¡¢¥¡£ ££ ¡¦££¥  ¤£¢¤£¡§£¤¢¥£¡¤£ ££¤¡¦§¥£¥ ¥¤¥¥¥¢¢¤££¥§§§¦¥¥£¥§¥£££§¥¤©£§¬¥£¨©¥©¤§§¥§¨¤¨«§§¨¤¨§§§©£¨¥¥¢¦¡£¥¥¨§¨§¦¦¢§¢© w~zxfz]kMz[In_D`YIdYFb_Ffq[rn|¿ÏÙá©å­æ°è®Þ­Öª½|£«z¨z®µ³¼ÀÈ¡Ì¢Ó©Ù¬Ü¢±à¦°ä§µè°¸ë®»ê¬¾ë¯¾ï²¾ï²¿ò´Áõ³Âø¼Äú·Èù¼Èú»Ìú»Ìú¾Ìú¾ÌúÁÎú¿ÐúÁÎúÁÒúÁÓúÄÔúÃÖúÃÔúÄÖúÅÔúÃØúÅØúÉÚúÅØúÃØúÃÚúÇÚúÃ×úÁÛúÁØúÀÖúÀÕú»Òú»Ñú·Ìú³Í÷³Ìô·Èõ¸Ê÷·Êö»Êö»Ê÷»Îú½Èø¿Êú¿ÍúÁÐú¼Ðú»Ï÷¼ÊúºÌú»ËúºÄú¹Êú·Èú·Èú¸ÈúµÆú¸Çù·ÅúµÆù¸Ãú¸Éú¾Êú¼ÈúÁÌú¾ÒúÁÎú¿Ëú½Îú¾Ðú¼ÎúÁÑú½Ìú½ÊùµÊñ«Âë«¿ç¥ºâ ·á¡´â£µã£³æ¤¶æ©³ä©·è®»í¬ºì°»ï°¹ð³Àí³½ë°»é­»é¬»é®¾è¯»ë­ºá¦»à¯¸ß«¹á§·á¥ºá©·ä¦ºæ¦ºê§¼ë¨Àí¨¹ñ¬Ãñ²ÄóµÄõµÄ÷³Éú»Ìú¸Îú·Ìú³Êú·Êú·Ëú¸ÊúµÊú¸È÷³Éö³Èô²Ãð®Ãï¬Ãí¬Àì¯¼é©½æ§»ã¨ºá£¶â¤µÜµÙ±Õ®Î­Î¬Í©È¦Ã£Á¸¹·³°«~©xroid~b{_zz]u{YrzYlqQonSf|Ug{QiYl[i_l]tUnlInS?gM:]F:[I?UI8SD8QM8QM8QO=SI:SODSUBWYF[`D``D`UFdbK`[Mb[B]WD]]B]SDbU?_[Mbd[fiYkr`nt]uqbxtdwwgxwfuxi|wgzu`zzfzzl{dx{i~l~d|g|~i~zk{g|l||k{i~~kl~fql|~nkog~k|nnnonntnttqxttxuxw|w||||{~~|¢ ¡¢££¤££¥£¦£§£§§¨§©©©¦©¦«©¬¬¬«­¬¬¬­­°¬¯«®°¯­¯®®­²°°²¯°°¯®°²°®¯±²¯¯¯¯°®²±°°²®¯±¯°µ°­®°¯¯®®°¯¯¯«¬©°°°¬®¬®­®®³±°°±®®®®¬¬®±­­°°«­««®°«¯¬¯®­ª±¬­­¬®¬¬«®­«²©¬¬¬°°¬¬¬®­¬«¬«ªª¬¬­«ª­¯¬ªªª¬«¬®«¬¬«­«ª¬«¨©ªª¬¬«©¬«ª§¬¬¬«¨¬««««ª©«««ª¬«©¦¬ª«§©¨«ªª©¨«©©¬©ªª©§ª¨©ª¦¥§¥ª¥¨ª£©©§¥¤¨§ª£¥©¥¦§§§§§¦©§¤¨¦¦©§§§¥§§£¤¨ª©    ¡ ¡¢¡ ¤¢¥¢ £¢ ¢¤  ¢¡¢  ¤¢¥¡¢ ¢¦¦¡¦¡¢ ¤£¡¤¡¢¥¤¢¥§¥¢£¥¨¥¤¨¡¥¥¤§¨§£¤¢¨ ¥¦¢¨¡§ ¥£¦¨£© ¨ª¢¨¡¤¡«¢¥ ª¢§¢¦£¬©¤¨¢ª¡«§§¡©¤¨¤¦¢«£©¨¨£ª¢ª¨¨£©¡©¦¨¤«¤©§«¥¬¦ª ª¤©¥¬¦­¨«¨­ ¬¦§¨¦¤¬¤¨¦­¡®¤«©¨¨¬¢ª¦§¨­¤®ª¯¦¬¦ª«¬¤®¥¬¨®¨­¨¬©¬©ª¥¬¥¨¦ª¤ª©¬ª­©¬©¬¥¬¤ª£¨¨¥~uizfgW`Qr`Oq]Sl_UiWSob]uq~§{¶ÇÐ Ó£Ò¤Í Æµ{ ¤°´´º Á¤È§Í§Ù ­Ú¢°ß©³ä¨´ä®ºè°»îµ¿î³¿ï¶Áò·Àñ³Åñ°Äõ·Ä÷¾Êú¼ÌøÁÍúÂÏúÁÒúÅÒúÃÐúÆÖúÆÖúÆÖúÇÖúÈÖúÈÙúÈÙúÆÛúÈØúÉÜúÊÚúËÝúÈÝúÉÙúËàúËâúÈÝúÆßúÅÝúÇÜúÂÙúÁÙú»ØúÁÐú»Òø·Ïõ¹Îõ·Ìö¼Î÷½Îø¼Ì÷ÀÍú¾ÍúÀÍùÁÎúÃÏúÂÒúÁÑúÁÒúÀÏú¾Ïú¿Íú»Ìú¼Êø·Ìø»È÷·Èù¯Åó²Åð°Åò®Åð°Âð®Áñ²Áô·Ä÷»Æù¾Èú»ËúÁÌúÁÐúÁÑú¾Ðú»Îú¹Éò¯Êì©Äã½ß·Ö³Ò¯Ô¯Ö®Õ®Ø ¯Ü¥²á¥²ã©¶æ­¹êµ¹ì³»î´¼ìµÁé³Âë´¾ì±ÁéµÁìµÁê³Áå¬Àã¬»ã°¼à­»á­¼â­¾ç¯Àè°¿ê«¾è­Áì°Áð³Ãð³Ãõ·Èù·Ëù·Ìú¼Îú»ÑúºÐú»Ðú·ÎúºÎúÀÎú¾Íú¸Ïø¹Ë÷·Êô¶Êó³Éñ°Ãï³Ãï®Âé­ÁâªÀæ¬¾â©¹ß¥»Ù§´ØµÖ¡³Ò¬Í±ÏªÈ¬Å¨Á¨¾¥º ¶µ¬®¤uulfffd|x`zu]xfSz]OkbWliQlo]nt_qkSobSiUFkOFiFI`MD]ODbII_KDWFD[QF[KF]KF[MK]OK]YOfOKiYKg]OgYUo_Sd_Si]SlYIk]OkQQdUQg__kfbqnitnl{ri{qo{o~uo|{otlxouo~xl{ltk{ozq{t|n{r|o|r~q|kzrrrzox~ozt|uxu|ttxutruzu{zw|~{~~~|££¥  ¦¤ ¦¥¬¦¨¤¨¦«¦¬©«ª¬¥¯ª«ª¯«®¬°¯¯°²­³°¯©´³ ³±³²´±¶³´°·³³¯´³³²¶±´²¶¯³¯µ±³³¶® ·®µ´µ°°³³®²³³³µ³µ®´²³¬²¯°±³­³²³°³±³¯³° ±´³±¶°³¬³¯´±±«²¬³¯±±²¬±°²³³®³¬°®·¬²­´®²¯´«²³²¬®®°°¯­³¬³¯±±®«±®³¯¯°±¬²«¬ª²¬°­³«²¬¯¬¬ª¯­®¬±¬¯¬±®®¬±®¬©«¬°®±¬®«¯©²­¯­®ª®§¯©¯®¯¬®©­¬¯©¬¬­«¯§­¨«ª®§­ª¬©¬©®¥¬¯¬¨ª§­©®§®§­¨¬¥«¥¬¦­¦¬§¬©¨§¬¥©|zz|{|z~~||~~|z~|~¢     ¢¡¡  ¡¡ ¡£ ¡  ££ ¢¢¡£ ¥¡ ¢ ¢ ¤¡¢¡¥ ¡¡¤¡¦ ¡¤£¢¥¡£¤¥¡¤££ ¥ £¦¢§¤£¥¤¦¢¥£¤¢¡¡¦¥¤¡ ¡¤¦§¤¤¢§£¤§¦¤§£¥¤¥¤§¥¡§¤¥¥££§£§¨¢¤§©¤«¦¨¤¥«©¦©©¥¦«©¥«©¤§£§ §§¤§¦§­§©§©©¨¦§¡§¡¢¡||tlgkS|[MkYKiUDf_Fg]Bd]MigMfqUqxYzd~inkfgb{l| x§~¯¯·¾ÁÇ¢Ñ©ÚªÜ¡¯Ü¥²ã¤²æ©·è¬¹ì¯¼ì°¾ì®¾ñ³¾ð³ÁòµÃö·Äù¶ÈøºÆú½Êú»ÉúºÌú¼ÌúÀÌúÁÐúÁÒúÁÕúÁÕúÄÓúÁÓú¾ÖúÀÒúÁÕúÂÖúÂÔúÇÙúÃØúÆ×úÆ×úÄÛúÅ×úÂÖú½Õú¾Öú¸Ðú·Ðú·Ëù³Èö³Êð¯Æó°Ãò³Äï¶Æô·Äò»ÆõºÄ÷¹Êø¼Êú»Êú½Êù¾Éù·Èø¸Éö·ÄùµÈõ³Áò°Ãò«Àî©½ë¦»ë¡¹ç¶ä´ã³â³á°ã°â²ç ³í¦·î«¹ö²»÷´¾ö²Âó¯Áð§½ê¾â¶Ú²Ô«Ì§Ì~¤ÈÈ¡Æ£Ë¢Ì¡Ð¤Ò©×«Ö©Û£­Ý¥°â§®â¨·ã¨³å¬µé«·ä¬ºã¬³å®¶â¨·á¦¹àªµÝ¤·ß©µâ¦µá¦¸á£·â§·ç©ºè¨¼ë¬½ò±Àñ¯Ãô³Ãø·Æú·Çú»ÊúµÊú³Ìú·Éú·Èú´Éú·Èø¶Èö±Çô®Äó¬Åï°Ãð­Âê­¿è«¾è§½ä§»á¦·à£·à£´Ø¡³Ö®Ð®Ò©È§Ê¤È£Ä£À½º·¶­|©{¡xkng|_w]t|`wwUqtYlqOnWBfI:_O=UU=YM=YQ:UM:UF8[F:QM8YB5QI8UI=QI5UM:UF5MI5UF5QI=QI:SO?SQFWUDWWD]]I[[K`bF`bDbYD]Q?bW?[UFY]K``QdgWkiWqq`kqfrq]wr`uwfqt`ztbwtdttfzwdztfztf{rdzufxwf~zi|ug{{l|ug|zg{xk~ugz{izzi{xg~|d{xk{xg~|l{{n~l|zq{n~|g{n|nikoknqrqtrttwwuwt|zz||z|{ ¢ £¡¦£§£¤¥§¦¦¥¨©¥§¬ª¬ª©§¬©®®«ª®«®±²­­±­®­®²±¯±°¬®­²²±­°±±¬¯±±°±°°¬®®±°­°°­²²®­°®°°®®®¬®¬¬¯°®¬­¯¬®®°¬³°°­¬¬¯°°¬®­««®¬®¬²¬¬®°«­¬¬®®«¬­¬«¬ª®¬¬®¬¬­¬¬¬¬©¬¬ª¬«¦®­¬¬®«««°«¬¬¬¬®ª®­¯¨¬«§­««©¨¬¬¬©¬©§««©¬«««­¬«ª©©«®«§«ª©ª¬«ª¨ªª¬¨¬ª¨¤¨§¬§¥««¨ª§¨¦¨¥¥¨§§§£¦¨§©§¨¨©©§¥§¥§©©¨§§¦©¢¦¨§§§¢¦¦¦¢¨¤¥¥§¥£¤§¤ ¡       ¢ ¢  £ ¢¢¡    ¡¡ ¢ §¢¡£¤ £¡£¡¡ ¡¢¤ ¤¤¤¤¢¡¢¦¢¤¡¥ ¡£¤¡£¡¡¢¤¤¨ ¢¡¤¥¤¦¤£¡¥£¦£¦¥¦¦§¤¢ ¤¢¥¢§©¨¤¨¤¦¤§¤§¤¦¥§£¨¤¦¥©¡¦£©§£¡ª¢¨¥§¥¦§©¦§¦©¢¤¦¦§¦¤©§ª§¥§ª¦¦§¨«ª§©©§¤©§¬§¥¦¬§ª¦¬¤¬©¦¨«©¨§©©ª¦¨¨¬©¦©­¦¬¦©¨­ª¬¨¬©«ª°«­ª¨¨®§­¨¬©¬©«¬­­¬¨¬®¨«®©¬ª¬¬­¬®¯«¬¯¤¯¨ª¬¬­¬¬®¬¯¬¬¬¨¬¬¤¬£§£¡£¡{ow`n[~fOo[QlbSi_Ql`QiiYkkSo]Kn`QldKnbQxdStiMr`Qqi]tnu{©²·¶ÁÃ¤Ì©Ô«Ú¤¯Þ¥°â«·äª¶ê¬½ë±¾ïµ¿ð´Ãò¶Ãó·Åô³Æö¹Ç÷¼Çú»ÌøÀÌú¿ÍúÀÑúÀÐúÄÓúÇÒúÃÕúÇÖúÅÖúÃÖúÅÖúÅÙúÆÜúÈ×úÆÛúÈÜúÆÜúÉÝúÆÛúÎßúËßúÊàúÉßúÄÛúÁÙú¼Øú½Õú¼Òú½Ðø¸Í÷´Ðö³Éõ¶Êð¶Ëï»Èö»ÌöºÊö¾Ìö¼Éù»ÌøÀÎù¼Éú»Í÷»ÌøºÈ÷·Åó°Çï±Áí©¿é¢¾è»ä·à³á¯Û³Ù°Ù²Ù¬Ø­Ü°Ü°à°ã³è¤¶ì©·î§»ì£·ç¶ß¸Õ¯Ï©Í§Ê~¦Ç§Æ¢È£Ì¤Ë¤Ë£Ð¥Ï¨Í¨Ô¬Ô¬Ö¬Ü¢­ß¤®á¦³â¨µã¬·æ¬ºæ­·ã¬µâ¬¶á¨¸à­¸ã¬·ã©¹ã­¸ä¬¼å¬½â«ºå®Áí¬Áï°Áô¶Æõ¶È÷»Èú»Êú½Ìú½Ìú»Íú»Òú»Ñú»Ìú»Òú¸Î÷ºÍø´ÌöµÈö´Èò´Æð²Ãï°Ãì²Áé¬Àç«¾æ¬¼ãª¸áªºÛ¡µÙ¡³Ø®Ó®Í­È¬Ê¨Ç©Æ¢Ã£¾¤¸¸´¬£zoqnggi{|_|z_uqSqQBiOD`MD]UI]KF]QBUQD[MD_MIYQB`QB]QI_ODUMFYQ?[SB[QK[OIWSBWQF]SK_]Ob[KdYMdbQfdUldQldSk[Mi]Sg_MddUigWll]nr`tlbxtdwxlzui~ti{ziwxiwl|k|zi~xk~zrzkwl{|n~o|l|ln{n|qu|l~o~q~n|n~u{ortltxrrwqtwwrwuw{zz{z~~ £¡£ ££¢¢¥¦¤¨¦¨§¦­­«ª¬ª©ª¬¬¬°¬±°¬¯®´²°¯²°³³³¹±¯³±³µ´³¶³³´µ´·´µ¸¶³µ¡³´´³³µµµ¶³µ³´³³³±´´²µ´´´³³²­´³¯µ³±¶³²´¯®µ´±´²³³³³³³³³³±±³¯²³³³²±³°²³°³³³²³®±±²²³®±²³³°°´³³°®®³±±²®°¯¯¯°³®¯¯±³¯²²³¯°°³®°±®³°¯¯­­­¬°­­¯­±±¯®®°°°°±®¬°®°¯±¯¯¯®³¯­¯°³²°°®¬«ªª­­®ª¯«°¯¬¯¯¬¬©¬¯­©¬­«¬¬«©«©¬ª¬¬¬¬¬ª¬ª¬¬¬©¬ª¬¬«ª«­¨©¨«¬¯¬©©«©|w~~|{|z|z|z~~~~¡¡  £  ¡¡ £¡¡¡¥¡¡£ ¢¢¡¡ ¢££¢£¡£¤¢§¡¡ ¡£¦§¢¤¨ ¤¢¢¥¡ ¤£¥¤¢¢£ ¤¡£¤¤¥¦¡¤¥¤¦¥¤£££¨¤£¤£¥§£¦§¤¨¢§£¦£¤¥§¥§££§¥§§§¡¥§£¤§¤£¨¦¨¨¦¦©§§¥§¡£¦¦¦¥¦§¥§¨§¥ª¡§¥§¥¡ ~£{ztnxflMw]InW?fYB]YI`UBYYMd_I`W=dOB_O:WU?]I0[M5_M8`OIbk[gqowª®³·ÁÃ¤Ê¨Î¥Ù ­Û¡°á¥²æ«¹æª»è­ºê³¿ë±¾î®Àï´Àò·Âó·Ãö¶Æö·Æ÷¹Çù»ÈùºÊú¼ÍúÀÐúÀÏúÁÒúÂÎúÃÒúÁÓúÃÐúÂÓúÆÔúÅÕúÃØúÃÙúÅÙúÄÙúÄÙúÈÙúÇÔúÀØúÁÓú¾Õú¹Ñú»Îù¶ÏöµÌõ´Ëô²Éï®Åï®Æï³ÄïµÃï´Åð³ÂïµÃò³Çñ·ÂñµÅñ·Ãñ²½ó²Áë¬¿ìª¼è£ºâ´Ý³Ü¯Õ¬Ö§Ó§Ò©Ñ¥Ð¥Ë|£Í{¥Ì~¢Î¢Ë§ÒÔ¥Ö¨Ù§Û¬ØªÓ¦Ï~¤Äz Åu¡Ãw¿tÂwÂ|ÃzÃzÅÆÃxÅÊÉ ÊÈ Î¢Ñ¦Ï¨Ô¥Õ¨Õ£«Ù±Ø ¬Ø¡±Ú£¬Ú£¬Û£²ß§³Ý§³Ý¨³ÝµÝ£·ß¤·è«¹ë­½ð²¾ó²Àó°Áö·Æú»Èú»Ëú»Êú·ÍúºÊú¹Ìú²Êö²È÷³Èõ²Èñ¯Æò¯Áð¯Áë¯Áê®½çª¾å¥»á¤¸Ý³Ú£·×µØ°Ó¯Ð¬Î§ÉªÇ¢Å¤Ã¢À ¾·µ³®¥xlkgd|dxz[w{Wuw[oxQn`BiF:YB8YF:WF8UI8OD8SI:OD8QB8YF8QF=OF5UF=OI8QD=SD:FF:OF8SI?QF=QSDUQB[UDYYF[YIYYK][I`YI__IbUF`WF`]UbgQg]UigWll]qn]rn]nogqn]tk`to_ulbxo`qnbwo`uudxn`tofzqbzqfztbzqi~ufzudzudwzfzwfwrf|ugzzf|ti{wgzzl{wkzzg~zlwi{wl{{k|{g|k~zl{iqk|n~nrr|qtqruuttwwxzx||z||~{~|~¡£¤¥¡¤¦§§ §¨¨©§§¨©«¦©¨ª¬¬­¬ª®¬«¬¬«®­¯®±­¯°²°±¯°°¬¯²­¯­®°¯°°°¬­
[truncated: 516,998 more chars]
