# Supplementary material for: 3D texture-based face recognition system using fine-tuned deep residual networks
Source: PeerJ Comput Sci. 2019 Dec 2;5:e236. doi: 10.7717/peerj-cs.236 (PMC7924501; doi:10.7717/peerj-cs.236)
Supplement: Supplemental Information 5 [file peerj-cs-05-236-s005.zip › Source files-part1-Only for checking-To PeerJ-examiner-Please Download this Zip∩╝îAll the source files in my Manuscript-3D textures based face recognition--Author-SIMING ZHENG/2---68-key-point--Source Document/01-files/ext.ppm]

P6
# Generated by OpenCV 4.1.0
640 480
255
¬¦¬§°§±§°¦¯©®ª®¨±©®¨®¦°§²¤²ª²©°©±¨°©­¤®ª³§²¥²«±§³¥±©³ª±¨²©³§±¯´©°§°«°§°ª³«³«³ª°¬³©³«´©³«³«·ª³® ³¬¡´§²«²ª³¬°ª´¬µ®³®·©³®·¬²¬³«´ª ³®·©³¬³¬µ¬¡³¬³¬¶¬³¬³¬¡µ®¢¶­µ¬³®·¬¶®¡·¯·®·­µ® µ³¡·°¢·°£¶²£·°·®¢¹²¢µ³¢·²£¶®¹­¢µ® ·­¢º³¡·®£¸³¢¶°£µ²¤»®¢·²£·²£¸°£³¬¢¶²£·±£¸¯¥¶±¸´ ·´¡·³¤º°£¸°¡·°£º³¤¹°·±¢·²¥º²¥º³§º³§ºµ¢º³£¹³¥º±§»³¥»²¤¸³¦·±¤º³¤¸³£»³¦º³£¹·¦º®¥»´§º±¥¸µ£º²¤º³¦º°¤¸°¤»±¡»±¤¼´£·´¡¹´¨½µ¨½µ¤º´¥º²¥½³¡»´©½³£¸·£¾¶¦½´¥¼·¦¼·§½´¤»´¥»´¥½´£º³¤¼´¡»µ¦»·©½·¦¾·©»¶¥»·©½·©¾µ¤¼¸§»³ªÀ·¨¾³¦½µª»·§¾·©»³¦»µ§¾·¥½·©¼µ§¾·§¾¸«½·¦½¹§¾·©½¶«¼·§»¸¦¾¸©¾º©¿¸«Á¸¨Ãµ§Â·§¾·¬½¶©¿¸¬¾¹¨Á·«¾·¥À·§¾¹ª¿¸«¾¾«¾¸­À·ªÀ»«Á¸¨¼·ª¾¹¬Ãº­À¸«Á»ªÀ·©Á¹¨¿¹¬Á¸¨Á¹§¾·©ÃµªÀ»«À¸«¾»§¿º¬À»«Á¹«¼¸¬À¼®Á»¬¿»¬Á¹ªÀ»®Âº®Ä¸ªÀ»§Á»­Á»¬Á»¬Á»¬À½©¾»¬Â¹­Á¼«Á½¬¾¼«À¾°Ä¼§À»°Á¾¬ÁÀ°Á½­Â·®¾¾«Ãº­Ã¾¯Â¾¬Á½¯Ã¾®Æ½®Á¼¬Á»­Á»«À»­Á¾«Àº«Á»ªÀ¼¬Ã¾¬ÁÁ­Ã¿¯Â»®Á¹­Á½²Ã½±Ã¾¯Ã½¬Á»®Ä»¬Á¾­Ã½®Ã¼­Á»¬Ã¾¬Á½©¿¾°Ãº¬Á¼¬Â»°ÂÁ²Ã½±Á½¬Ä»®Á»¬Ã»®Ãº¬Ä¼¬ÀÀ°ÃÀ°Á¼­ÆÁ®Ä¾²Ä¿±Ã¼³Ä»¯ÀÀ­Â¼²Ã¾­Ã¾®Ä¿­Â¾¯ÄÀ¯Ã½¯Ã¾±Ä»¬Â¾©Ã»¬Â¾¬Á¹¬Á»­Á½¬Á½²Ã¼®Á¼®Ã½®ÃÃ¬Å»­Ä½¯Â¿±Ã¾°Æ½®ÅÁ²Ã½®ÂÁ®ÃÀ±Ã¾®Á¾®Ã¾¯Â»®Â½±Â»®ÂÁ®Ã»¯ÃÀ²Ä¾®À»­ÁÀ­Æ¾±Ã½¯ÆÁ²Ã¾¬ÃÀ°Ã¾±ÄÃ­Ç½°Á¾°ÄÃ¯ÂÂ´ÄÁ³ÆÁ¯ÄÀ±Ä¾²ÆÁ³ÃÁ­ÄÁ±Ã¿²ÄÁ±Æ¾±ÂÁ±Æ¾²Ä¼²ÅÁ²Ç¾³Å¾²ÅÀ­Ä¿¯Ä¾´ÂÂ²Å¾²Ã¾¯Â¾®ÁÃ³ÆÁ²Å¾­À¿°Ã¾°Æ¾µÅÁ¯Ã¾®Å¾´ÁÀ®Å¾¯ÃÁ±ÆÁ±Æ¾²Æ»®Æ»­Â¾°ÃÁ®Ã»°Ã¿®Á½¯À¿®Á»­Ã¼°Â»°Å¾²ÃÁ¯Á½²Æ¿®Ã¾±Ã¾²ÃÁ²Ã½²Ã¾®Â¾¬ÁÀ¬ÄÀ°Ä¾¯Á¾®Â½°ÃÀ¯Á¾¯Á¾°Ã¼±Ã½²Ã½²Â¾­Â¾±Ã¼­Ã½°Å¾­Á¾²Á¾²Ã¿®Ä¼¯Ã½®Ã¿²ÆÀ®Ã½®À¼±Á»®Á¾­Á¿¯Å½±À¿²Â»²Á¼¯Ã½®Â¼¯¾½«À¸¬¾»¬À¾¯Á»²Á»­Á¾¯À»­Ã»¬¾½°¿º°ÁÀ¬Âº«¾º¯Á½°À¾«Ã¼®Á¼®Á»¯À¾¬Á¼¯½¾¨Á»®¾»¬¿¼¯¾º­¿¸¬½»°Á½¬¿¼®½¹®Â¸«¾º«¾½¬¾»ªÁ»ª¿»°¿»­¾º¬¾¸¬À¸¨¿»«¾µ¬Àº«¾¸§½¸ª½µª»¹¨»·¬À·§½·§»µ«¼¶ªº·£½¶ª¼µ©¾·¥¾·ªº·«¼¸¨»³¦½²¥¼·¥»·¦»·«»²¦¼³¤»·©º³¨º´§¸³©»³¨»³¥¸µ¦º´©º·§»³«¼±¦½³¥»·¨¼³¦»·¤º³¥º°¥¾¶«º³ªº´§»³¨¸³§º³¦»±§¸³£»³¥¹µ©º°¡¸¯¦º³§»±§¹¯¤µ²§º±¢·±¦¸¯¤¶³¦º´¥¸±¦¸°£·°¢º°¢¸±£¶­¢·³§¸¯¥¸±£µ®£µ¯£·±¤·­¡·¯£·­¥·°£³²£¶¯¤·®¥·°¡·°£·¬ ¸­¥³­¢µ® ´° ·²£´°¤¸°£¶¯£³¬¥·¬¤·°¡¹±¡³®¤¶°¢·®¡µ®¤³¯§³±¡µ®£µ¬£·®¢¶¯¢³° ³¬£³±´¬¡·­¢¶©³­¡³­¢³¬¡µ®¶¯¡µª¡¶©¡²ª£³«¢±¬ µ¬³¦¢±ªµª¡µª¯¬ ³ª²ª°©¡²«²« ´ª´«²¬¯¬°¨°¨®¬·¨²§¦¯ ¬­£¯®£¯¯ °®¦®²¥²® ±¬¢°®¥±°£­­¤¯±¢®²¢²°¢¯¯£®­¡³¯£±²¥²²¤³¯¡±®¯¯¥®®¥³¯¡°±¤±¯£´¯¢±²¡¯³¤³­¥°±§²­§³±¤±³¤³¬¡³²¡·¯¤¯²¥²±¥±°¥³³§¯°§´´¥±®£®±¤°²¡³°©´¯£°²§³µ¤´±¥³³§³°£³°£·³¢³±¦´³¦³°§µ³¤³²£¶³¥¶³¨µ´¦µ®¤··¦³³§³³¥¶³§µ¶§¶´¦´³¦³µ¥µ³¦·µ¦·±ª·³ª¸¹¨³´§·³§¶µ¬¶µ©¶´¨¸µ§·¶ª³·¬³³¨·´§·µ©¶¶§¸¶©µ¶¬¶·«·µª¶·«¹¸¨»·¨¶·©ºµ¬··©··¬¼º¬¸º«»¸ª·¹«¹¶ª¹·«º·¬·¸«»·ª¼¹§ºµ¬º·¨·¸¬·¶¨¶·¬¸·­º¹­º¸©º»®º¸­¶·¬º¹©»º¬»¸¨¼¹ª¹¸®º·ª¹º¬·º°»¸®»»®»º«½º®º¹¬»»®»¸ª»¹­¹º¬»»«»»«»»­¼»¬¹¹©¹¹¬¾»¯¼»¬¼º®¼ºª¸»­»¼®¾»­»»­¼½°¼»¬»·¬»½¬»¼¯¾À­½¾®¼¼¯¼¾­»½°»¼­¾»®¾¾¯¿¼¯½½¯¾¹­»»¯À»®¿¼®¿»±¾¾­¼¼®¿¾¯¾º®½¼³¼¼°¾¾¯¾»²¾¾²¼½¬½»°»À®½¿°À½³¼¿®¾À±¾¾±ÁÀ²ÀÁ±ÀÀ¯Á½³¿Á³½½¯À¿­¿½³¼À°¿¿²Â½¬À¾°À¾±ÀÁ±À¾²¿Á±¾Á±Á¾²¿¾´¿¿³¿À¯¾¿±¿¾±¿ÃµÁÀ³Á¾¯¾Á²¾Á±¿¿´ÃÂ³À¿°ÄÀ®Á¿´¿Â±¿À°ÁÂµÂ¿°ÁÁ°Á¾¯¾Á±ÃÂ´ÂÃ²Â½°¿¾±ÁÁ³ÂÃ¶¾À³Á¿³¿Ä¶ÀÁ³ÁÁ³¾Â±Â¿³ÃÂ°ÁÁ³ÁÁ¶ÄÅ³ÁÁ¶ÁÁ±ÃÁ²ÁÁ¯Á¿³ÁÁµÂÁ²ÃÂ·ÆÁ¶ÀÇ³ÂÃ³ÁÁµÂÂ²ÅÃ³ÂÃ´ÃÄ³ÂÂµÃÃ·ÂÀ¸ÃÄµÁÃ´ÃÁ³ÀÁ±ÅÃµÁ½°ÀÂ¶½¿µÀÆ¶ÃÅ³ÁÃ³ÂÆ¶ÁÁ¶ÄÃ¶ÁÄ³ÃÆ¶ÃÃµÃÂ²ÂÃ³ÁÆµÃÅ³ÃÄ·ÃÂµÃÂ¶ÀÇ³ÃÃ´ÃÀ±ÀÀ±ÀÃ³ÆÅ¶ÃÄ³ÁÄ³ÃÃ·ÃÁ³ÄÄ¹ÆÀµÆÂµÂÄ¶ÁÂ´ÁÅ³ÂÈ¸ÈÃ¶ÆÈµÂÆ·ÅÃ¹ÃÅµÂÆ¶ÄÅ·ÅÆ·ÇÆµÂÃ¶ÃÃµÆÆµÂÄ±ÄÃµÂÄ³ÂÂ¶ÆÂ´ÂÅ³ÄÀ¶ÁÄ°ÃÃ·ÄÆ³ÀÅ¹ÃÆ·ÅÆµÃÆ·ÃÃ¸ÃÆ¶ÃÆ³ÆÆµÃÂ¶ÄÂµÁÈ¸ÂÈ¹ÆÃ·ÅÆ¶ÆÅ´ÃÃ¶ÁÅ¶ÃÃ¶ÅÅ¶ÆÅ¸ÂÆ¶ÀÆ·ÂÂ±ÃÄ¶ÅÇ¶ÅÅ¹ÆÅ´ÂÆµÄÆ¶ÅÅ¹ÅÇ¶ÆÅ·ÁÆºÈÇ´ÆÈ¼ÅÅ·ÅÆ·ÄÆºÃÆ·ÆÃ·ÃÆºÆÆ·ÃÅ·ÃÆ¸ÄÅµÅÈ¹ÈÅ¶ÆÂ¸ÃÆºÃÇ¶ÈÂ¶ÂÆ´ÂÃ¶ÅÃ·ÅÇµÃÆ¹ÃÆ¶ÁÈ·ÄÇµÅÃ¶ÅÅµÅÆ·ÃÄ¸ÅÆ·ÃÆ¹ÅÆ»ÆÃºÃÈ¶ÅÆ¹ÆÆºÇÆµÇÃ¶ÆÄ¸ÆÆ¸ÅÈ¶ÃÃµÁÆ·ÃÃ·ÅÉ·ÅÄ¶ÃÃ¶ÅÇºÃÄµÂÅ´ÃÇµÂÆ¹ÅÆµÁÃµÄÃ¹ÁÆµÃÅ¶ÃÂ¶ÅÅ·ÃÇ¹ÅÇ¹ÃÄµÀÂ·ÅÆ·ÅÆ¶ÃÆ¶ÁÅ»ÅÈ»ÂÄ³ÆÅµ¾Å·ÃÁ·ÅÁ¶ÃÅ¶ÃÇ·ÃÆºÃÅ´ÃÄ¶ÃÃ·ÃÅ¹ÆÄµÃÆ·ÅÅ¶ÃÄ·ÃÃ·ÁÄ²ÃÃ·ÅÁ¸ÃÅµÆÁ³ÀÀµÁÃ·ÄÁ³ÂÇ´ÄÁ¸ÁÃ³Á¿²ÁÃ¶ÁÃ³ÅÅµÂÁ´ÃÂ¶ÀÃµ¼Á¶ÁÁ³ÀÃ³ÀÃ³ÁÃ·ÁÅ³ÃÀ´ÁÃ¶ÁÁ·ÁÂ³ÀÂµÃÃ·À¿±À¿µÁÁ³ÁÂ³ÁÁµÁÀ¶¾Ã³ÁÁ¶ÁÂµÁ¿³ÁÁ³ÃÀ³À¿³¼¾´ÀÁ±¿¾³ÀÂ´ÁÂ±¾¾°ÁÂ³¿½´À¿³½¼¯¿¾²ÀÁ±¾Á³¾¼¯¼Á¯½¿®½¾±¼º³¼À°¾¾²½½±¼¿°½Á±½¿¯½¿³¼½¯½»²»¾¬½¼­»»°½¾¯½º¬¸º¯»»¬¼»³¹»°¹»¯ºº«¶¾¯¼½¯½¹°»»±¼¼¯¼¼°»¹°¹»¬»»­»¼¬Àº¬¹¾®»¹²»»¯»¹¬¹¼­¹º­»º­¸»­ºº®¼·®»º­»¹±¹º«»º¬·»¯µ¶¬¹»ª¹·®¹»¯»¸ª¸º¬·¹¬¸º®·¶ªº¹¬·¸¬´µª¶·¬¸·©¹·ª·¸¬µ¶©´·©·¶¬¹µ©¶³¬¶·ª¶¶ª¶´¬¶µª·¹¨·¶«³µ©·¸¬¶¶©·¸©µµ©µ¯¨·¶ªµ¹«·µ¬·µ¨·µ§µ·«µµ©µ³«·´¨·³©µ³©·µ§µ¶ª·µ©µ´¬¹µ¥´µ«³·ª³¸¥µ¶¬µ³©±³¦³³¬³³¬µ³¬¶³¨³³©·²«µ³§´³¨¶´ª¶³§³²¦´²¨³³§³±©´³¦°³¥²³¦³¯¦³±§°±­µ´©´°¤±²¥³³¥³°¤°¯ª²®£²³¤²³¦³±¦®¤«©®©¯®¯«²¨±ª¡³®µ§°«°«®¬®ª²«°©°¬°¯±«²«´¬³¬°¦²ª°ª³©³¯°¬°¬²« ³©°«´®±¬³¬³­²¯´¯¡²°µ«³¬²¬²¬³¬µ­³­²­³®¡²® ´¬´¬³¬±¯¶¬ µ®¶¬¢³®¡¸¬³­¤¹­¶®·°¡·°¢¶°¤·° ¶°µ­¢»± ·° ´®µ°¢¶°¡¹®¡µ³¸²¢µ±·²£¸®£º²¢º²¢·² µ²£¸±´µ¢¹²¥»³¢º³¤¶¯¥¸³¢º³¤¹³£¹³¦·´£º´¡º²µ³¥¸±¥¼²£¹²£·³¦»³£»µ¥º³¤¹´¥»·£¸³¥ºµ¢¹µ¤»´§¼´£¼µ¦»µ§»µ§¼³£»³¥½µ¤»³¥»µ¨»µ¦»¶§½´£º±¥¾·¥º·¦»µ§¼·§º¸¦½³§¾·¦»³§»µ¦½¸©»´¥¾µ¦¸·©½¶£½¹©»·¦»¶¦¾¹©½·¦½µ©»¸£¾µ§¾·¨¼¹¤º¸¨½³£¾¹ª½·«»¸©¾¸¥½¸¨¾·©Á¹¨¾·¦¾·ªÁ¹§¿¸®¾¶©¿¸§Á·©À¸ªÁ·¬¾»¦¼µ«¾¸©¾»¨¾¸¬¾·¨¾·¬¾º¬¾µ«À¾¬¾·ªÃ»ª¿»«Á¸¨¼º¬¿¹©À»ª¾º¬À¸¨¿¹«¾¸©¾»©¾º¬¾»­À»«½º©À»¬Àº®Á»®¿¼¬Ãº¨Á½«¿»­Á»¬Á¼©Á»«Á»¬Á¼©Á¹¬Áº¦À»ªÁ½¯Ã¼¦Á»¬¿¼ª½»¬ÃÀ«Á½©Á¼¬Ãº¬ÄÀ®Ã»­Ã¿©Á»®Â½­Ã¾«Ã½¬Á»¬Á»­Â¾¬Á½«Å½«ÃÀ¨Á¾¬À¼­Ã¾¬À¿®Á¾¯Á½­Ã¼¯Á¾­Á¼°ÂÀ±Ä½¯Ã¾®Ä½®Â¾®Ä¿¯Å¼«Ä¿¬Ã¿­Á¾®Â¾­Ä¾®È½°Á¾¬Â¾®Á¾ªÃ¾¯Ã¿¯Ã¾®Ä¿­ÅÀ®Â¿²Á¼¬Ã¾®ÁÁ­Ã¾³Å¾®ÆÁ¬ÆÂ°Æ¿°Æ¾¬Å¿®ÅÁ­Å¿°Ä¾ªÁ¼¬Å½®Å¿¬Ã½¯ÃÂ²ÅÁ°Â¿²ÃÂ°ÆÀ°ÀÁ±Å¾±Ä¿­ÃÁ¯ÄÁ±ÃÁ®Å¿®ÂÁ³ÃÀ±Æ¿´ÃÁ°Ã¾²ÇÀ°Æ¿°Â¼­ÁÀ¬ÁÃ±Ç¾²ÂÁ®ÃÀµÅ¿®ÃÀ¬Ä¾°ÃÀ¯ÅÁ°ÆÃµÄ½±ÃÀ°ÅÁ±ÆÀ²ÄÂ´Ä¿®ÃÀ°ÆÁ®ÅÂµÁÀ³ÄÃ´ÅÀ°Â¿²ÆÁ®ÄÃ°ÆÁ³Å¾²ÄÁ®ÆÄ°Å¾²ÅÁ¬Á¾²À¾¯Ã¾«ÃÁ¯ÇÁ¯ÆÄ´ÆÃ¯ÃÆ²ÇÀ®ÃÃ²ÂÃ³Å¾®ÂÁ³ÅÃµÄ¾¯ÃÂ´Æ¿²ÄÂ°ÃÃ²ÄÁ²ÆÅ²ÆÄ°ÄÃ¶ÈÂ­ÃÂ±ÆÃ²ÆÀ°Æ¾¯ÂÅ°ÁÀ²Æ¿°ÆÁµÃÀ²ÆÁ±ÅÆ³ÃÁ²ÃÀ±ÃÇµÇÁ³ÇÃ²ÄÄ´ÅÆµÆÄ·ÆÀ³ÆÀ°ÆÂ³ÆÃ±ÇÅ±ÅÄ³ÃÃ³ÆÃ³ÆÁ´ÈÂ°ÇÃµÈÂ³ÆÁ²ÄÂ²ÅÃ´ÇÃ³ÄÂ²ÆÁ´ÈÄ³ÆÃ³ÇÂ³ÆÂ±ÆÄ°ÆÆµÉÂ²ÆÃ³ÆÄ²ÇÂ¶ÇÃ³ÃÀ³ÈÄ·ÇÃ°ÆÂ´ÆÃ³ÃÃ´ÉÃ°ÆÃ´Ä¾³ÆÂµÄ½±ÃÁ³ÂÀ¬Å¿´ÄÁ¯ÆÂ³ÄÁ²ÇÂ°ÃÀ°ÄÂ²ÆÁ³ÃÃ±ÄÃ¯È¾°ÄÁ´ÄÃ¶ÃÁ´ÇÃ³ÆÀ³ÄÄ²ÆÃ²ÃÁ²ÅÃ³ÆÂ²ÄÂ²ÅÁ±ÈÁ¯Å¿³ÅÃ³Ã¿´ÃÂµÄÃ²ÅÁ³ÄÂ³ÆÀ¯ÆÃ³ÆÃ³ÄÀ¯ÅÀ¯Ã¼´ÃÁ®Â¿±Ã¼¬ÄÂ´ÆÀ¯Ä¾±Ä¿¬ÅÀ±Æ¾²ÁÀ°ÀÀ¯À½°Á»¯Ã¾²À¼¯ÂÁ°Ä¾°ÃÀ®Á¾±Â¼°Ä¿¬ÂÀ­Á¿±ÁÃ­Å¿°Ã¿³Å¿²ÁÁ²Á¼³Ã½²Ä¿¬Á½°Ã¾®Á½­¾½³Ã¾¯Â¾¬Ä¿¯À¹¯Â¾¯À¾­½»­Á¼³Á¼¬¾»°Á»®Á¾¬¾»°Ã¾¬¿»¬¿º°Ã¾­Á¼¬¿»©À¸©¾»§À»«¾»«¾¶¬¾¼®¾¸©¾¹«½»«À¸¬¾º¬¿»¬Á¸¯¿»ª½¸ª¿ºª¼¸ª¾¹¬¼¸ª¿·§¼·¨»·¯¾·§¾·©¾µ«º·«½¶¨¾µª¾´¥º·­¾¸ª¾µ©»»¨»¸©¼·©¼¸ª½·¨»¸¬º¹§»´¦»´ª¾·§¾·§º³¨½²§º¶§»¶§½·ª¼¶¦¹³§¹·©»·ª¼¶§»µª»¶§¸´©¼·¦º³¥»¶¨º·§¸µ§¸·§»±¬¾µ¥¹³¥º³§»µ§¹µ¥¸µ©¹²¥º³£¹²¥¼³£¸³ ¸²¤¸²¢¸¯¤·³¤º²¢¹¯£·²§µ´¦¸±£³µ¤º±¢¸²©º´£·³§¹°§´µ¦·²¨»°§·²¦µ´¥º®¤¸²£¶¯¢·³¦¸µ¡·±¢·³¦·¯¥µ±§¶°¥·®¤¶²£·²¡¸®¥·±¥³²£·®¡µ®¤¹¬¡·±¡·®£´­§·°¡¶°¡´³¥´¬ ´¬µ®¢³« ³°³¬ ±¬¢µ¬³¬ µ«¤²« ±¬¡²­¥²­³¬ ²® ³¬¢³¬¡µ¬¤³¨©¯¢³®¡²±¤°°¤²±¢²±¤³±¢³°¡³³¡°±¤±¯¥³°¡²±¦±²¢³¯¢±±¡µ²¨µ³¤µ²³³¤±±¥³³¢°¯£¯²¡³³§²°©°³¥¶¯¤³±¨±µ¦¶´¥³²¥³µ¤³³¤´µ¨³²¥´³§µ³©µ±¦´³¥·µ¦µµ§µ³¦´²£µ³¦¶¶§µµ§³³¡´´¥µ¶¤³³§·µ¤¸µ©´´«µ³¬¹µ¨¹¸©¹µ§µ·¦µµ¥´¶¨·³¥·²©³´§¹¶«µ·¨¸·§µ¶¨·¶ª¸¶«¹¶©·¶§µ¶ª¶¶¨·¸§µµª¹µªº¶¦¸¶©·¹ª¹µ¬¶ºª·´§¹·ªº·§¹¶ªº¹¨º¸«ºµ¬¹¹¬··«·¸©»·«»¸«»·¨··ª¹·®»·«»»¬»½¬»»¯º¸®»·­¹¶§¹·¯¼¹«ºº­»º¨½»­»»­»º¬¼½¬º»«¼¼±¾¹¬¹»®¸»­¼º®Á¼­»·­¸¼­¾»¯»¼«»»­¼¼°»»°½»¬¼»¬»º¯¼»¯¼»¬¼À®º¼­¿¼¬»¼°¼¼®¾À¬¼»¯¾¼®ºº°»¾®»½±¾º¬À½­À¼®¾»®¾¾­»¼®À¾­¿¿®¾¼­¿½¬Á½°½¼­¾¿¬¾Á°¿½°¿¾²ÁÀ®¾»³¾À±Á¾­¿Á¯Ã¾°¾¾²ÀÁ³Âº­¾¿²ÀÃ¯ÀÁ²À¿³Á¿°ÁÁ±ÁÀ¯ÁÁ²¿¾²¿À°¿À®Á¾±ÀÁ²¿À­À¿´¿Á¬¿¾®¿Ã´ÁÂ¯ÁÀ±¾Â²ÁÁ¯ÁÁ³ÀÀ³¿Á²ÃÁ´ÀÁ²ÁÃ°ÁÁ¶ÁÃ´ÂÂ³ÂÀ³ÁÂ´ÁÂµ¿Á®Â¿¯ÂÁ³Â¿³ÃÁ³ÂÂ±ÁÁ°ÁÃ³ÃÀµÃÁµÀÁ°ÂÃ³ÁÁ³ÂÂ²ÂÂ´ÁÁ²ÅÇµÄÅµÄÁ³ÁÅ·ÁÂµÃÄµÃÁ³ÅÅµÁÂ²Á¾³ÂÃ´ÁÁ´ÅÆµÃ¾´ÂÃ³ÁÆ´ÃÃµÄÃµÃÆµÅÂ·ÁÅ³¿Â¶ÃÃ´ÂÅ·ÆÄµÃÂ¶ÂÂµÂÃ´ÆÃ´ÄÄ·ÂÄ´ÄÄ³ÂÆµÇÅ¶ÆÁ¶ÁÃµÂÆ¸ÄÃ´ÅÃ·ÈÆ´ÆÃ·ÁÆµÅÃ·ÁÇ·ÄÇ·ÃÅ·ÃÆ·ÆÃµÆÊ¸ÇÃ·ÃÆ¹ÇÉµÃÃ³ÄÃµÇÁ´ÂÄ¶ÆÅ¹ÆÂ¶ÃÁµÅÇ¼ÅÆµÃÈ¹ÆÄ·ÅÇ³ÅÄ·ÆÇ·ÂÃ¶ÄÅ³ÅÆ¶ÃÇ³ÆÆ³ÂÇ·ÄÄ·ÇÃ¶ÀÄ³ÆÁ³ÃÁ´ÃÆ³ÅÅ·ÅÈ¶ÆÇºÈÃ¶ÃÆ¶ÇÆ·ÂÆ³ÆÈ¶ÇÆ·ÅÅµÆÄ¶ÅÄ·ÃÇ·ÇÇ¶ÅÈ¹ÊÆ·ÈÆ¹ÅÈ·ÅÇºÇÆ¶ÆÈ·ÅÃ¶ÆÉ·ÆÆ·ÄÇ·ÆÈ¶ÇÆ»ÅÈ·ÆÃ¶ÆÈ·ÆÆµÇÂ·ÅÆ¶ÅÈ¹ÆÆµÆÆ¸ÇÈ¹ÇÈ¶ÆÈ¹ÇÈ¶ÆÇ¶ÈÉ·ÈÈ·ÉÈ·ÇÄµÄÈ¶ÈÈºÆÈ³ÁÈ·ÆÆ·ÅÇ»ÆÇ¹ÁÇ·ÈÊ¹ÆÊ¸ÆÆ»ÈÉ·ÁÈ·ÃÆµÈÆ¹ÅÆµÅÇµÅÈºÈÈµÆÈ»ÅÇ»ÇÇ·ÈÈºÆÇ»ÇÈ¸ÆÊ»ÊÊ·ÆÇ»ÆÉ³ÅÇ»ÇÇ»ÆÉºÅÉ¸ÊÇ¹ÆÆ¹ÆÈ»ÈÊ¸ÇÊ·ÄÉ¹ÇÈ¶ÆÉ»ÇÊ»ÇÈ¹ÈÇ·ÅÉ·ÈÊ¼ÈÉ»ÉÊ·ÅÈ¸ÆÇºÊÇºÃÈ»ÆÉ·ÉÆºÄÇ¹ÈË»ÈÊ¼ÈÈ¹ÆÆ¹ÇÊ¹ÉÈ·ÆÇ·ÄÈ¶ÅÆ·ÄÆ¼ÆÉ¶ÃÆ¸ÈÄ¹ÈÉ¶ÃÅ·ÆÃ¶ÄÆ·ÇÈ·ÅÇ¼ÆÈ¹ÆÃºÆÈºÈÆ»ÃÉ¶ÄÈ¸ÆÅ¼ÆÅ·ÆÆ¹ÃÅ¸ÆÅ¼ÇÇ»ÇÊ»ÆÉ¸ÆÇºÅÆºÇÆºÇÈºÆÉºÇÃ»ÄÆ·ÅÈ¹ÆÆ·ÃÈ»ÅÆ·ÄÆ»ÆÆºÇÆ¹ÆÊ·ÄÆºÆÃ·ÅÆ»ÅÅ·ÁÁ¹ÆÆ´ÃÈ·ÄÆ¶ÃÈ´ÃÄ¶ÇÃ¹ÃÂ´ÇÄ·ÃÆ³ÁÆ·ÆÃ³ÁÁ¶ÅÃ¸ÂÅ¶ÅÄ³ÁÄ¹ÂÄµÁÁ³ÀÃµÃÃ¹ÇÇ·ÅÅ·ÃÅµÃÆ·ÀÃ·ÃÃºÆÁ´ÃÅ¶ÆÃºÃÅ³ÁÂ·ÁÃµÃÇ³ÁÂ³ÃÀµÃÄ³¾¿³ÂÄ¶ÁÁ´ÂÀµÁÁ³ÃÂµÂÁ³ÁÀ³ÂÂµÀÆ´¾ÀµÁ¿¶ÁÂ°¾Á·ÁÀ³¿Á°¾ÂµÃÁ²ÂÁ³¾Á´¾À³¿Â³Á¼³¿¾µÁÂ³Á¿±¿½³¼½±½Á®¾¾´¼¾¯À»²¾¾¯ÀÀ³¾Á±¼½³¿À²¾¾±ÁÀ®¾»°¾À¯¼À³»º­À»­»¼²¼»µ¾½°¼½³Á¾¯¾À­¼»¯»¿¯¿¾°¼»¯»¾¯¼¼¯¼»°»½²¾»¯»º­¿»¬¼½°»¹³»º¯¼¾®½¿¯¼½¬»»¬º»®¼»­º¹¬»»°»¼¯¾¼°º¼¬»¹¯¼»­¾¹­·º­»µ­¼½¬º¼«»¹¬»»¬¹¼¬¶»¬¹·®»»ª»·¯»¶¬··ª·»¬¹·ª·´¬º¸­·µ¬¸·¬¸·¬µ·¬½·­·»©¸·­º·ª¹µ¬¶µ®¹º¬¹¹¬µ·¬¼¸¬¸·¬·µ¬¹¶«¸·«µ·«µµ¬··¨¶¹¬¸»¬µ¸¨¶¶«¸¸¨´¸©¶»¬¶º¨¶·ª·¸¬µµª·µ¦·¶¬¶±ª·´ª´·§·µ¨¶º§·²¨´¶©·µ¨·¶§´³¨±²§µ·¦³µ«²´¥¶²¨³·§µ³©³µ¥´±¥³´ª³´«³±¨´³§³´£²³§°³¨¶¡ª­±¬®­´¬°«¡²«´¯ ²¬ ±«µª°­´«µ¬²¬´±³«´®²­µ®´¬³­±¬µ¯ µ¬¡µ°µ®µ°³¬³®³®´²´­²®µ¯µ®¡³° ³®µ¯¤µ¯¢³± µ° ´²¢µ¯¡µ±¢¶¯ ³°¥µ³£¸³·±£·®¡·± µ®£µ²¶²¡·®£·² µ± ·®¶² ·³¡³°¦¸°µ­¡µ³¢³²£º³ ¸´£¹±£·´¡¸°¢·°£·³ µ³¡µ®¢º²£¶³£µ³¦¸³¤»²¦¸±¤¹µ£¸´¥¸´§»´¤¸µ¡»°¢»·§»µ£º´¨¹´¥·³¥º¶¦¸²§¸³£·µ¦¹·ª»³£·³£º·¦¾¸¤¼¶§»·©½µ©¹¸¡»³¢»°¨½¶¥¼³¦¿µ§¼µ§ºµ¨½·ª¾º§»·§½²¦»·ª¼·©½µ¦½·ª¾¸©½·§¿º©»·ªº¸©»¸¦¾¶¥½»©¾·ª»»¦¾·§½»ª¼¹©¿º©½·ª»»©½¸ª½·§½·¦¾»«Àº©¾¸§»¸¬¾»ª½º§¼·¨Á¹«¾¾°¿½¦½¸ª¾ºª¿¹¨À»§À½¨À»¬½»¨Á»©½»ª¿½¬Ã½¬À»¬Á¹«½º¬Á¼¨Á»ª¾ºªÃ»«¾¸«À¹¬¿»¯¾¼©Â½¬À»®Á½­Ãºª¾¾ªÁ»¨À»«¿»®Ã¾¬¾º¬¾»©Á»®Á»¬¿»¬Á»¬À¹¦Á¾¯Ã»®Ã»®¾»®Á»®Å¼­Á»¬Ã¾®Á¾®Â½°Ã¾­ÁÁ²Ä½­Â¾¯¾¾©Â»®Á¼ªÆÀ­Ã»®Á¾¬ÃÁ¬ÁÀ²Ã½¬Ã¾¯Ã¿ªÀ¾¬À¾°Ã¼¬ÂÁ®Á½¯ÅÀ­Ã¿¬ÃÁ®Å¿¯Á¾­ÆÃ°ÅÁ²Ä¾±Ä½­Ã¾¬Ä¾¯Ã½¬Á¾°Å¼¬Ã¼®ÃÀªÃ½³ÁÂ¬ÃÁ°ÅÀ¯ÆÁ°Ã¾±ÁÁ®Ä¾¬ÃÁ°Æ¿³ÂÁ±Ä¿°ÆÁ®¾¾°ÆÁ²ÅÂ°Á¾¯Æ¾³ÄÁ²ÄÃ´ÆÁ¯Æ¿±ÆÁ²ÃÄ³ÆÂ°Á¿°ÆÁ²ÆÁ±ÄÃ³ÄÃ¯ÆÀ´ÆÃµÃÂ²ÃÁ±ÆÁ²ÆÁ°ÈÀ«ÃÀ±Ã¾®ÇÁ²ÅÂ³ÃÁ²ÄÃ²ÄÁ´ÇÆ°ÆÂ°ÄÁ´ÄÁ°ÆÁ´ÅÃ³ÅÁ³ÆÂ²ÆÃ²ÃÂ¯ÆÁ²ÄÃ¯ÇÁ±ÅÀ³ÆÅ°ÆÃ°Ä½²ÆÁ«Å¾¯Ã¾¯Ã¾²ÆÂ²ÅÄ´ÅÂ³ÆÃ´ÄÁ²ÉÂ±ÆÁ°ÆÃ±Ã¾±ÄÁ³ÆÃ³ÈÁ·ÇÆµÈÄ°ÄÁ³ÂÃ²ÇÃ³ÇÆ²ÇÁ¯ÅÇ·ÊÁ²ÈÃ±ÆÆµÅÃµÈÆ³ÆÂ·ÇÄ³ÆÃµÈÁ®ÃÁ®Ä¾®ÆÂ±ÅÃ³ÇÃ³ÇÄµÇÀ±ÃÁ³ÆÈ³ÇÃ¶ÄÆ³Æ¾±ÆÄ±ÄÆ¬ÈÁ²ÆÄµÈÄ²ÄÃ³ÇÄ³ÆÃ³ÇÄ³ÆÂ³ÅÅ·ÊÃ³ÆÄµÇÃ³ÇÁ³ÄÃ²ÆÆ³ÆÄ²ÆÁ²ÆÂ´ÅÃµÇÃ´ÆÆ³ÆÅ·ÇÄ¶ÆÄ·ÊÆ·ÉÇ·ÈÄ³ÆÅ·ÈÂ·ÆÄ³ÇÆ³ÇÄµÈÅ³ÈÃ·ÇÆ´ÈÇ³ÉÅµÊÃ³ÈÇ¶ÈÅ¶ÈÂµÈÇµÈÇ´ÇÅ¶ÈÃ³ÄÄµÉÃ³ÈÄ´ÇÆ·ÈÆ·ÈÃµÈÅµÈÆ²ÇÅµÈÇµÇÄ³ËÆµÇÄ³ÆÄ³ÈÃ³ÆÃ²ÃÃµÈÄ³ÆÅ³ÇÄ¸ÆÃ°ÈÄ³ÆÃ³ÇÄµÈÃ´ÆÁ·ÇÆµÆÃ²ÈÄµÅÃ´ÆÆ¶ÆÄ¶ÆÄ¶ÆÃ¶ÈÄ³ÈÄ·ÆÂ³ÈÄ´ÅÁ´ÆÁ³ÊÄ³ÄÆ·ÈÄ³ÇÂ·ÄÂ·ÆÇ´ÈÄ¶ÅÆ²ÅÁ±ÃÃ³ÃÃµÈÃ´ÆÅ¯ÄÃ³ÈÆ¶ÇÄµÅÆ´ÆÆ¶ÃÅ²ÈÁ³ÄÃ³ÇÆ²ÆÁ³ÇÂ³ÄÁ°ÄÃ´ÆÄ²ÃÂ²Æ¿³ÄÀ³ÆÄµÆÃ±ÁÁ³ÄÁ°Â¾²ÃÁ²ÄÁ³ÃÃ³ÆÁ¯Æ¾­ÃÀ²ÆÃ²ÆÃ²ÅÀ³ÅÀ²Æ¾´ÅÁ³ÄÁ¯ÃÃµÆ¾³Á¿³ÃÁ²ÃÀ±Æ¿²ÄÀ°ÇÀ®ÃÀ³Å¾µÃ¾±Ã¾±Ä¾°ÃÀ¯ÅÀ±ÃÁ®Ã¼¬ÇÁ°ÁÂ®ÁÁ°Å¼²Á¿¯À¾±Ä¿³Ã½¯¾¾®¾¼°¿»­Á¼¯Á¾¯Á¼¯Â»¬À¼®Á¾®ÀºªÁ»­À»®À½®Á½®ÀÀ­Ãº¬¼¼¬¿¹¬¾½­Áº¬¼»¬À¹°À»°Á¹«¾»­½¸¬¼»§¾»©»»¬À»ª¾·«¾·ª¾»­Á·«¾¸«¾»¬¾¹ª¿»®»¸®»·¬»»«À¹ª¾ºª¼»©¼¹¬½¹¬¼¹«½¸ª¼¸ª¾¶«¾»«»·©¼µ©¹¸¬º¸ª»¸­½¹ª»ºª½¸©¸·ª»·¬½¶§½¸«»µ§»¸¥»º¥»´©¹´©º·ªºµ¬»·£»·§º·¦»³§¸²¨·³§¹³§¹²¥ºµ§·´¨·¶ª¼´§¹´¦¸²¦»³©¹·¥·³¥¹³§»´¨¸³©»µ©·³§»¶§·´¥º³¨¸µ¦»·©»³¤·µ©¸³¥º´ªº°¨¸³¥¸´¤¹¶¥·³¥¶°¦¹´¤¸·¤¸´§ºµ§·µ©¸³¨·³§·²µ³£·²¦·³¤·°¤¸²¥·°¡¸°£´¯£·³¥¶¯´®¢·­£³®¡·³¤´®¥·®¤¶±¡³°¡·°¥´®¢³°¡³°²°£²¬£´¬ ³¯¤³«¥¬¯¢°¯¥³³¥³°£°°§³±¥±µ¡³¯¤³´¤´²§³³¤³¯¨²³ ³³¥³³¤µ°¤³´¥µ³¤·³¥³³¤´²¥¶°¤³´£µ®§¶µ¥´µ©³³©¶´¥´µ§¯³§·³¦¹³¦³·£·´§¶µ¥³³¤µ³¦³·¨³³¥µ³¨··¦··«µ´¥·¸«··¦·µ©¶³¥¶¶¦¶µ¨¹³§µµ¨¶·¦´·¥¸·§··¨·³¦¹·¬¶·«º´ª¶·§µµ¥·¶ª·¶¦¹³©¹·¨µ¹¨··ª·²¬´·¨¹¸«¹·«¹¸¨¶ºª¹·¬·º¨··ªº¹¯¹¹ª¸¶©·¹¬º¼ª»º¬·»©»¸«¹º¬»¹©»¸ª»·©»»®»¹¬»¹¬··ª¼½¬¹»¬½·ªº¹¬½»­¹¼¬»»­¼¹­¿»®º»¯»º­½½¬½»¬¾»¬¿»®»º¬½»¬½¾®»º®¼½°¾¾°¾¾¯½»¯¼¾±Á¿®Á¼®¼¼¯½½®¼¼¯½¾®¾»­À½°¾¾°»¼®¾Á¯¾»­¼À¬½À¯¾¼­½½°¿¿³À»®»½®¾¿­À½°¾À¯¾»²½½®Á¿­¾½²½¾¯¼À±¾¿°Á½±Â¾¯½¼°¿¾³ÁÂ³Á¿­¿¿¯À¿±Á¿³¿À®¾¾¯Á¿µÀÃ³Ã¾®ÁÃ°ÀÁ³ÁÃ´Ã¾³Á¾®ÀÁ±ÁÃ¯À¿µÁ¾²ÁÂ³ÁÅ±Ã¾±À¿³ÃÃ³ÆÁ¶ÀÃ±ÃÀ®ÁÁ±¿Á°ÃÃ³Á¿µ¿Á±ÃÁµÅÃ¯Å¿³ÁÃ³ÂÁ°ÀÃ³¿À¯ÀÃ³ÀÀ³ÃÁµÂÁ¶ÃÁµÃÂ²ÂÂ³ÁÁ³Ä¿¯ÃÅ³ÆÁµÆÀ±ÂÅ´ÈÀ³ÁÁ°ÅÅµÃÁ³ÃÃµÃÅµÁÁ·ÄÁ´ÃÂµÂÂ±ÁÃ²ÃÅµÃÂ°ÁÂ¶ÅÄ´ÆÆ³ÃÁµÃÃµÂÃ¶ÅÆ¶ÇÆ¶ÄÅ¶ÆÅ³ÄÂ´ÂÁ´ÅÁ·ÅÃ´ÄÆµÄÃµÆÂ³ÃÅµÃÃ¶ÃÄ·ÅÃ·ÅÆºÅÃµÂÅµÃÁ´ÅÄ¶ÆÆµÈÆ·ÇÆ´ÁÃµÆÆ´ÃÆ·ÇÄ¶ÃÈ¹ÃÃ¶ÆÆ¹ÅÆ°ÅÆ´ÈÅ·ÅÅ³ÈÄ·ÆÆ·ÆÉ·ÅÇ·ÄÆ·ÈÅ¹ÇÉ·ÈÈµÇÈºÆÈ½ÃÈ¹ÈÆ·ÆÆ·ÆÆ¸ÈÈ´ÅÆ·ÆÅ¶ÅÈ·ÅÆ·ÆÈ»ÆÇ·ÇÈ¶ÈÈ¶ÆÅ¹ÄÇ·ÆÈ¸ÈÈ·ÈÇ·ÆÆ¹ÈÈ·ÅÇ·ÄÆ¸ÈÃµÄÆµÇÅ»ÈÆ·ÅÆµÃÅ·ÆÃ·ÆÉ¸ÆÂ³ÄÆ¸ÃÈ·ÆÇ´ÆÉ»ÉÈ¹ÈÌ¹ÇÉ¹ÇÉºÇÄ¶ÇÊ»ÆÊµÈÅ¹ÃÆµÆÉ·ÈÊ»ÈÌ»ÉÊ»ÆÉ·ÆÈ»ÆÇ¹ÆÈ·ÈÉ¼ÉÇ»ÆÇ·ÇÈ¹ÆÊ»ÉÊ»ÇÉºÉÈ·ÆË»ÇÊ¸ÈËµÅÆ¸ÇÈ·ÅÆ»ÈÇ¸ÉÈ»ÆÆ¼ÆÈ»ÊÊ·ÇÆ¹ÅÈ¹ÈÈµÈÈ»ÆÈ·ÈÊºÇÊ»ÈÉºÈÃ¹ÈÊ·ÆÉ»ÊÆ¸ÆÉ·ÄÌ¼ÊË»ÉÊ¶ÇÈ¸ÄÊµÃÈ¹ÈÆ·ÆÈ·ÈÈºÊÇ»ÉË½ÆÈ¹ÈË»ÈÈ»ÈÊºÊÊºÊÊºÉÌºÉÈ¹ÉÇ¹ÇË¸ÊÈ»ÆÇºÊÊ¹ÈÍ»ÆË¾ÊÊºÉÌ»ÈÉ¼ÊÈ»ÊÍ»ÇÈ¿ÆÊ¼ÉÊ½ÈÍ»ÈÊ»ÊÎºÇÎ»ÈÈºÇÊ¹ÉÊ·ÊÊ»ÈÊ¹ÄÈ¹ÈÈ¼ÈÌ¼ÈÆ»ÉÈ»ÊÍ¼ÉÈºÈÊ»ÊÌ¹ÈÈ¹ÆÈ»ÈÆ»ÆÈ¸ÇÌºÇÉ»ÈË¸ÅÈºÊÊ»ÉË¸ÈÆ¹ÆÊºÄÈ¶ÆÈ¹ÈÇ¹ÈÌºÇÉ¿ÉÌºÊÈ»ÊÈ¼ÆÈ»ÈÈ¹ÆÉ¹ÅÈ¼ÆÈ»ÆË»ÅÆ»ÈÌ¿ÆÉºÈÊ¸ÇÊ¹ÇÆ»ÆË·ÆÇ»ÈÈºÆÈ¹ÆÇ¾ÇÊ¸ÈÊºÆÇ»ÆÉ»ÈÈ»ÈÈ¹ÇÊ¸ÇÇ¹ÆÆ¹ÇÈ·ÆÃ¹ÇÈ¸ÈÆ¸ÃÇ·ÆÈ¾ÆÇ·ÈÆ·ÆÈ¹ÆÈ¹ÆÇµÆÈ·ÂÇ·ÇÆ¶ÆÈ·ÆÆ·ÆÅ¹ÃÄµÅÆ¶ÇÆµÆÇºÆÄ·ÃÈ¼ÆÅ»ÆÅ·ÃÆ¹ÅÆ¼ÆÈ»ÅÅ·ÃÇµÆÇ»ÆÂ·ÄÆµÅÃ¶ÃÅ·ÇÈ¶ÃÅºÆÃºÃÃ¹ÂÆµÃÆµÂÆ¸ÄÃ¶ÅÃ±ÅÃµÄÃ³¿Ã¶ÁÃ´ÆÃ·ÃÃ¶ÃÈºÂÄ³ÅÀ³ÂÁµÃÃ²ÁÃ·ÃÂ´ÆÀ³ÁÃ´ÃÂ·ÂÂ¶¿¾°ÁÁ¶Á¿µ¿Á³¿Ã³ÃÃ¶ÃÁ´ÁÃ³¿Â²ÁÁ±ÁÀ³ÁÃ³ÁÁ·½¿³¿¿³¾¼µ¿¿³¾Á³¾¿®¾À³½¿°¾¿±À¾°À¾±¾½³½½µÁ¿³¿À±ÁÁ°Á¿°¾¿²½¿¯¾Á²À¾±¼Á³À¾¯¾¿´¾Á²¾¾¯¼¾³½¾³½Á¯½¼±¾»¯¾¼®º¼®½½²»»¯¾¼³»¼­½º¯»¾¯¼»­»»¯À¸­¾¼«»¸²»¹°½¿­º»®º¸¬¼»­»»­»»®»º®¼¹¯¸»¬º»¬º¹¬»º¬»»®»º¬·¶¬¸º¬¹¼°º·®¼º«»¹¬»¸®¶¹®¹»«¹·±·º°ºº¬¹¸¯¹º¬»»­µ·¬º¹¬»º®º»¬¹¹®½¹¬¹º¬·¹­»¹¬·»¬¸·®»º¬¶·¨º´®¸¸¬¹¸«·µ¬»µ­·»ª·³¬¸¹®·¶ª¸·«·µ©¸·ªµ¸¨¶´¦µ·«µ¶©²µ«¶¶¨¶´¨³³¬³´¥·¶«¶³©·¶§µ¶ª¶³©·¶©³¶ª³¶¤µ´ª´µ¨¶´¬µ§°¯µ«³¯¡²¬´¬³¯¶±µ¯¶¯³¬³®µ®µ¬³­µ®·¬³¯µ±µ®¡µ±´²±®·°¡·­·¬¡´°£·®¡³¯µ±·®µ²¢µ°´²µ¯¡·°£¶°¹¯ ¶¬·²¢µ²¡·¯£·°£´²¡·°¡¶²£¶³¢¸³£¶°£¸°¸²£¸°£»²£¶°¸± ·µ¡·³¤»³¡¶´¤º² ¸³¥¹±£¸² ·± ¶´¥·³£¹®£»³¢µ±¤·²¡»³¥·µ¦½±¢¹¶¦»µ·² »·¢¸´¥»µ£»·¦¼µ¦º´¥»¶§º·©¾µ©»³¦»µ¥·³§»µ¦¼µ©½·¦¾·§¹µ¨¼º¥¼µ©½·¨»³§»·¥¿µ§½¶©¾·§»¸§¼¹ª¼·«Á·£¾»¦»·¤¼¶©¾·§½·§¾º¥½»¦½ºªÀ¸©¾·«»·©¾¹©¿·«¾º¦¾¹«¿»©»¸ªÀ·ª¿¼¨½¹¨À¹§¿¹ª¿»ª¿º¨½½©¾º«¿¼§½º¤Àº«½¹§½·ª¾·§¾º©À¹ª¿¸ª¾¾¬Ã½«¾·©À¼ªÃ»¬Â»¬Á¼«Å¾ªÀ¼¬Â»¬¾»¬Á¼«Ãº¬Á»ªÀ»¬Á¾¬Á½©Ã»«Ã½¬Â¾®Á¿¬ÁÀ¬Â¾¬½»®Â½ªÃ»«¿¼«Â¼«Â½¬Ã¼«Â½¬ÁÀ«Å¾«Á¿©Ä¾±Ã¹«Â»¬Ã¾¨Ã½®Ã¾¬Á¿­Ã¾®Ã¿«Ä½­Ä¾­Á¾«Æ»«ÃÁ¯Ã¾¯Ä»¬¿À¬Ã½°Æ¾¬Ã¾«Ä»­ÅÁ²Ã¿­Æ½­Ã½­ÆÁ°ÅÁ®ÆÃ°Å¾­ÄÀ°Á¾«ÂÂ±Ä¾ªÆÁ¯Æ¾¬ÀÁ±ÆÁ­ÄÁ¯ÃÀ¯ÆÀ®ÃÀ¬ÁÁ®ÆÀ±ÈÀ°Ã¾¬Ä¾®ÄÃ²Ä¿®ÅÁ°ÆÁ²ÅÂ¯ÅÀ­Ã¿®ÆÁ±Ä¾¯ÄÂ²ÄÁ­Ã¾°ÇÁ¯ÆÁ®ÄÀ°ÇÂ¯ÄÁ°ÆÀ²ÃÀ°ÆÃ®ÃÁ³ÆÂ«ÃÁ±ÅÁ³ÇÄ²ÄÂ­ÇÂ®ÄÁ°ÇÁ­ÇÅ¯Æ¿±ÇÁ³Æ¾±ÃÃ²ÅÃ³ÆÅ³ÈÁ²ÇÄ±ÈÃ³ÆÃ¶ÈÆ³ÅÄ±ÆÅ³ÇÃ²ÇÃ³ÅÅ´ÇÃ³ÇÆ±ÆÁ°ÆÃ°ÇÂ²ÆÂ²ÆÁ³ÅÇ³ÇÂ±ÈÃ³ÈÁ±ÆÆµÆÃ³ÃÆ³ÇÁ°ÆÁ¯ÆÂ¯ÅÄ³ÄÃ±ÉÂ´ÇÆ³ÇÂµÇÆ°ÊÃ²ÇÅ³ÉÁ°ÆÄ²ÅÅ²ÇÆ³ÊÆ¯ÆÂ°ÅÅ°ÆÅ±ÊÃ¶ÈÆµÆÆ³ÈÆ¶ÅÆµÈÇµÊÅ´ÉÇ³ÉÆ°ÈÅ±ÈÁ³ÈÄ°ÉÇ²ÈÄ³ÈÄ²ÆÄ³ÆÅµËÇ´ÊÆ¶ÉÆµÇÄ³ÊÇ·ÈÆ´ÈÇ¶ÊÆµÇÅ³ÊÃµÇÇµÊÈ³ÆÅ²Æ¿®ÆÄ±ÄÅµÈÆ³ÈÄ´ÈÁµÇÆ³ÈÃ´ÆÃ´ÈÄ²ÈÃ²ÇÆ¶ÉÄ´ÅÄ´ÈÇ³ÈÇµÈÄ³ÆÅµÈÇ¶ÉÇ³ÈÃ³ÈÄ·ËÆµÊÄ·ÈÇ°ÈÈµÈÇ±ÃÄµÈÆ²ÆÂ²ÄÆ´ÈÆ³ÈÆ·ÈÅ¹ÈÆ·ÊÃ·ÈÄ¸ÊÆ·ÊÆ´ÊÆ·ÉÆ·ÈÆ¸ÊÈ·ÌÅ´ÈÅµÈÇ·ÌÇ·ÊÆ·ÈÇµËÆ¸ÉÈ´ÊÉ¸ËÇ¶ÊÆ¸ÊÊ¶ËÈ¸ÉÈ²ÊÈ¶ÇÆ·ÉÇ·ËÈ·ÈÈµËÇ·ÊÅµÄÆ²ÊÆ¸ÊÊ´ÉÆ·ÊÇ·ÌÇ·ÊÈ·ÉÈ¹ÇÇµÆÇ¶ÇÄ·ÇÆµÆÈµÇÇ²ÆÅ¹ÊÇ´ÈÆ³ÇÀ·ÅÅ¶ÈÅ²ÊÀ²ÈÅ²ÆÅ¸ÉÄ´ÊÆ³ÈÅµÆÆ·ËÈ·ÇÆ¸ÄÄ´ÆÄ²ÆÆ·ÌÃ³ÈÆ·ÈÆµÇÅ·ÆÆ¶ÈÆ¶ÇÇ²ÉÄ·ÆÆ¸ÉÈ·ÆÈµÊÄ´ÈÆ²ÇÂ·ÄÆ´ÉÄ´ÈÆ¶ÈÆ³ÇÇ³ÆÇ¶ÆÆ³ÈÅµÇÄ³ÇÅµÈÃ³ÉÇµÇÆ¶ÉÆ·ÄÆµÆÃ³ÇÂ²ÊÁ³ÅÁ²ÃÃ¯ÆÁ³ÆÃ³ÈÁ³ÅÃ³ÇÁµÈÅ²ÅÁ³ÇÃµÄÄ±ÆÅ²ÆÄ´ÇÅ³ÂÁ¶ÆÁ³ÇÂ³ÅÃ±ÇÄµÇÂ²ÅÁ³ÅÄ²ÈÄ±ÄÂ³Ã¾²ÆÁ±ÃÂ´ÆÁ²ÃÁ´ÄÄ³ÆÄ°ÆÀ³ÅÁ±ÃÁ°ÆÁ³ÄÃ±ÃÃ³Ç¾®ÃÂ²ÄÁ³ÄÀ¶Ä¾±ÅÀ­Ã¿°ÅÁ­Ã¿°Á¿³ÆÁ°Ä½®À½³ÃÂ®Ä¾®Á½¬Ã»­À¾²Á¼®Ã»°Â½°¿¾¯Á½¯ÁÁ®À»¬Á½²Ã½¬Á½¬Á½®¾»«Á»¬Á»«¿½¬¾»©Áº®¿»«¾·¬¿¹°Á¼¬¿»­¿º¬À¼­Â¾¬¿·­¿¹¬¾¾­¾½­À»­Á»¬Á»«À¸­Ã»®¿»¬Á¸¬¿¹­¾¹¬Àºª¾º¬¾¸¬¿¹§½·«»»ª¾¹ª»¸ª»µ«»º¬¾·§¼·©»·ª»º¨¼¹«½µªº³©½¸¬¹¸«½¸¦¾´§»·«¾·§»µ¥»¶¦½»ª»³§»¶¦ºµ¨»¹¤ºµª¼µ¨¼µ§¹º¨»¶©º·©»·¤¹¸ª¼¹¦º´§»µ¥·µ¦¼¶©¼·§º¶©··§»³¦¸´§»¶§¹µ¦»µ¨¸¶¥¸¶ª¸´©º³¦½·§»³¦»´¤¹·¥¹°¦·µ¨¸´¦¸µ¥¸³¦·´§¶°¨¹±¤·³¨·°£¸µ©·³£µ±¦·±£¸°£·®¥¶³¥µ± ·³¦·¯ µ±¥¶°¢¸®£´®¤·²¢¶¯¥¸¯£³³¡·¯¦¶°¤µµ¤¶«£­µ¨³³¤³±¦µ°¥µ´¨´³¦µ³£µ³¥³²¤¶³¢²´§²¶¥´³§·µ¥·´¨³¶¤´´«³´¨´³§¶´¦´¶¦³´§°¶ª´¶¦·³¦µ·¨¸³¨¶·«³¶§¶µ¨µ³¥¸³©·³ª´µ¨¹²¨µµ¨·³ª·¶¥¶·¨·¶©º·¬¹µ¥··¥·µ«´·¨··§··¬¹µ¨¸¹©·¶«¹·§¸¶¨¶¸¬º¶¦»¶ª´¶«¼º¨¹¹«¹µª»¹¬¸·­º¸«¹»¬»¸©¹·¬¹µ©··¬´¶¦·»«º·¬¸º«»¶«¸¸ªº»¬¹¹ª¹»¬»»®»»¯½»©»º«»¼¬¾½®º¹«À´¨»¼­¼»°½·®½·«À¼¬½º°¼»®º»­º»¬¼¼¬¾»®»»­½»­¼½¬»»ª¿»®¾¼¬»¾®¼»±»¼®¼Á±¾»¯½»°À½¯Á½®»»­½¾«À¼®¾À®¿¿¯¾¾¯¼½°Á¿¯Á½³Á½­¾½±¿¾®À¿°¾Á°Á¾³À¿°ÀÂ¯Á¾°À¿°¾À®Á¾­¾»²¿¿¯Á¾¯À½²Á¾­¾¾®ÀÁ±ÂÁ³ÂÀ¯ÁÁ³ÄÁ²¾Á³¾¿²Ã¾²ÁÁ³ÂÁ²ÃÁ³Ã½³ÁÂ³¾¿³ÃÃ³ÂÀ³ÁÀ°ÁÂ³Å¾±ÂÀ°ÃÅ´Â¾®ÂÀµÃÀ³ÁÁ±ÂÁ¶ÃÂ³ÂÃ²¿Ã·ÀÂ³ÂÃ¶ÄÂ³ÁÀ²ÃÃ³ÆÁ¯Á¿¯ÂÃ³ÁÂ·ÁÀµÆÁ³ÂÁ´ÅÆ³ÃÁ²ÁÁ¶ÄÂ·ÆÆµÆÁ¶ÂÃ³ÂÃ·ÅÁ³ÃÆ¶ÇÃ·ÃÃ¶ÅÃµÈÂµÅÃ°ÇÅ´ÇÃµÅÃ³ÃÄºÈÁ´ÃÅ³ÆÂ·ÈÅ´ÁÇ·ÇÆ³ÃÃ²ÅÄ³ÆÄ·ÅÂ®ÆÅµÆÂµÆÄ¶ÆÆ¸ÄÄ¶ÅÆµÈÃ´ÆÆµÅÃ·ÆÅ´ÃÇ·ÅÃ°ÆÅ¶ÆÇµÅÇµÄÆ´ÅÈ¸ÆÅµÄÉ·ÈÉ·ÇÅµÃÀ¶ÆÆ¶ÆÄµÈÃ·ÇÃ·ÃÇ¶ÆÇ·ÊÅ¹ÅÇ·ÈÃ¸ÆÆ¸ÉÈ·ÄÆ·ÇÈ¶ÅÅµÆÅ¶ÅÈ¸ÇÈµÇÇ¹ÈÃ¸ÆÆ´ÆÊ¶ÆÇ¸ÆÈ¸ÈÅ»ÊÈ¹ÉÈ·ÇÇ¹ÆÆ¸ÆÇ¹ÇÇ¼ÉÅºÉÈºÇÈ¹ÅÉ»ÈÈºÆÈºÊÉ·ÇÈ¸ÈÈ·ÉÆ·ÆÈ´ÇÆ¸ÈÆ¶ÈÈ¹ÈÉ¸ÆÈ»ÆÉ·ÈÈ¶ÇÉ¼ÇÊ¼ÈÈºÈÈ¸ÇÇµÈÊ¹ÈÊ¸ÊÅ¸ÆÅ¸ÆÈ·ÈÆ»ÇÈ¸ÇÊ»ÉÈ»ÈÉ¹ÉÈ·ËÈ¹ÈÉ¹ÈÊ¼ÈÊ¹ÈÇµÆÈ·ÈÊ·ÉÉ¹ÊÇ¹ÄÍ½ÅÊ»ÉÈ»ÈÊ¼ÈÌ¾ËÇºÉËºÈÈ»ÆÈ¹ÊÈ¹ÉÇ¸ÈÊºÈÊ»ÊË»ÌÈ½ÉÊºÊÊ¼ÊÊ·ÊÉ¾ÈÈ¿ÈÊ¹ÊÇºÈÈºÈÊ¹ÉÈ»ÈË·ÆÆ¸ÈÇ·ÆÈºÈÉ¹ÇÉ¸ÇË¾ÈÈ»ËÉ¹ÈÉºÈÈºÈÌ»ÌÉºÊÉºÊÌ¼ÈÌ»ÈÊ¹ÇË½ËË»ÈÌ½ÊÉ¼ÈÊ¸ÈÈ»ÈÌ»ÊÊ¹ÈÉ»ÈÊ»ÌÊ¸ÈÊºÉÈ½ËË¹ËÊ»ÊÈ»ÊÍºËÊ¾ÈÌ½ËË¸ÉÈ¼ÈË»ÊË»ÊÉ»ÈË¾ÊÌ¾ÍÈ¿ÇË»ÌÊ»ÉÌ¼ÊÌ»ÌÇ¿ÊÌ¾ÈÌ¾ÊÌ¿ÊÍ¾ÊÊ»ÆÍÀÌÊ¼ÊÎ¹ÉË½ÊÊ¿ÊË¼ÌÊ»ÊÌ¼ÊËÁÈÌ¾ÌÊ»ÈÍ¾ÊÉ½ÌË»ÈÌ»ÈË¾ÊË¿ÊÌ¿ÌÈ»ÉÊ¼ÊÊ¼ÈË»ÊÈ¾ÈÈ¹ÉÈ»ÈÊºÊÉ¾ÉÊºÈÈ¼ÈÇ»ÇÉ¶ÊÊ¹ÌÊ¼ÊÌ¼ÊÊ½ËÊ»ÉÍ¹ÆÉ¾ÈÉ½ÈÇ»ÈÌ»ÉÉ½ÊÊ»ÇÈ¾ÈË¼ÈÍ½ÇÉ¹ÇÊ¾ÈÈºÈÊ»ÈÉºÆÈ»ÊÊ»ÆÊ¾ÇÌºÇÊ¹ÆÊ¼ÇÈ¾ÊÊ¹ÊËºÈÊ»ÉÉ»ÉÊ½ÈÊºÊÊ¾ÇÌ»ÇÈ»ÉËºÈÊºÈÌ»ÇÈ»ÇÆ¼ÅÉ¹ÇÊ»ÊÈ»ÆÆ¹ÆÉ¹ÅÆ¹ÈÄ¹ÇÈºÇÈºÈÈ»ÇÇ¸ÉÇ·ÇÊ»ÊÈ¹ÆÆ»ÆÆ¸ÆÊºÇÆ¹ÃÆ¹ÅÅ¸ÈÇ·ÇÉºÈÉ·ÅÆ¶ÅÅ»ÂÅ¹ÊÆ·ÅÅ¹ÃÃ·ÈÆ·ÃÅ¶ÃÆ¸ÈÈ¸ÈÃ»ÇÇ·ÈÅºÃÆ·ÃÆ·ÈÁ·ÁÆ·ÂÆ¹ÅÇ·ÁÅ·ÄÆ·ÃÅ·ÃÄ·ÆÄ·ÂÁ¶ÃÄºÃÄ³ÃÁ³ÅÂ¶ÁÃµÃÃµÁÄ´ÃÂµÁÁ¶ÂÁ³ÀÁµÃÁ´ÃÂ²ÁÁ¶ÁÁ³ÃÃ¹ÃÃ¸ÂÀµÅÁ´ÃÃ±¾Á³ÃÀ´ÁÀ°ÄÁ´À¾²¾Â´À¿µ¾Á´Á¿³ÁÁ²À¼³¾Á´ÁÂ´ÀÁ³ÁÁ³ÂÄµ¾¿´Á½´¾¾³ÁÀ³ÂÀ¶ÁÁ²½Â°¿»¶ÁÃ³ÀÁ³Â¿²Á¾°ÁÁ³ÁÀ²À¿³¾»±¿¾²¾¼²½¾°¿¿°À¾³¼½®¼»±¿½°¾¾®Á»°¾¼±¿¼­»»¯¼¸²»¾®»¾±»»®¼»°¾»¯»»±»»¬¼¼²¿¹¯ºº®º·¯¾»°»½¬»¹¬º»±½»®½º­··­»»±¼º¬»º®¼»­ºº°¼º¬º·¯½º¯»º¯·º°¹¼®º·¬µ¿¬¾º°º¸¯º»®¹»¬¼¸¬¶¹°»»©¸»¯·¸¯»¸®¹·­¶¸§º½­¸¼¬··¯¸¸ª»¸¬¸·¬»¸¬¹·­¹·¬¶¹«»¶ª´·¬¹·«¸·«¶¶¬·¹©µ¸©·´­·¸«ºµ¨¹²«·¶ª´·©µ·ª··«¶¶¨µ¶¥·¶ªµ´¨µµ¬·¦®¬´°²±¡¶® ·²¶²¢³®¡¶¯¶­¡·²µ°£³³¶®¡·®¡³²¡µ°£·³³°µ²·±µ´¡¶¯£¸± ´°·¯·®¡³®£µ¯£µ® ³°·¯¡¶²¡·® ¶²¢¸°¡¶´¢¶³¥·³¹´£´²¡·°¢·±£·´¥¸°£·³¢¸³£·´£º¶§º³¢´µ¢¶²¤¸´£¸´£¸²¢·´¢»³¤»·¼³¦·µ¥¹³¤»³£¸´¥º³£¸µ¥¼³£µ±¤»¶¥¶¶¥¸³¦¹·¥¸µ¡º²§¸´¦¾´¦¹¸¬¾µ§»³¡¼³§»¸¨¼º¤»³§»´¨¼¸§»¸¢À¶§»·¦¼µ¦½¶©»·¦¾·ª½¸¬¿¹¨»¸«¼¹©½¸¦¼º¨¼¹§½³ª½¸©½·¨À·«½º©¼¹©À·§À¶ª»·¬¾ºª¿¹¨¿·©¾·«¾¸§Á½«À¸¨½º¬½½¬À¸©À»ª¾¹§Á¼¬Á¹©¿½¬¿»¬¿»¬Á»¬Á¸¬Áº«½»«½»¬À¾©À¸ª¿»©Á½«À»¬Á¼¬¾¼®Á¼«À¹«¿½¬Á»®Á»®Á»«À½¬Â¾¯Â»ª¿¾®Â¿«Â½°Ä¿«Ã¾¬Á½¬Ã¾¯Á¿­Â½­À¹®Ã¿¬Ä»®Ä¾­Â»¬Á¾®Å½®Å½®Ã¼®Ã¾­Ä¾°Â½®Ã¼¬Â¾®Ã½±Å¿®Ã½¬ÂÁ¯ÁÃ±Æ¼¬Ã¿¬Â¿°Ã¾®ÃÃ®Ä½­Ã¾­Ã¿°Ã½®ÄÀ²Ç¿¯ÂÁ¬Â¾°Ã¿°ÃÁ®Ã¿¯ÆÁ°ÃÂ²ÆÁ²ÆÁ¯ÅÁ°Ã¿°ÄÀ®Æ¾³ÄÁ²ÇÁ­Ä¿³ÄÁ°Ç½²ÄÀ­ÃÁ­ÃÁ°ÆÁ®Â¾²ÆÂ±ÆÁ³ÇÀ°ÅÁ¯ÅÄ®ÆÁ³ÆÁ¯ÇÃ®ÈÂ®ÄÁµÈÂ°Ã¾¬ÅÁ³ÈÂ²ÈÁ°ÆÁ¯ÈÄ°ËÃ¯ÇÃ³ÃÁ¶ÇÃ²ÇÃ²ÈÃ°ÆÁ³ÅÃ°ÆÁ±ÇÁ³ÅÅ²ÈÃ´ÇÅ²ÅÆ²ÈÁ±ÊÄµÈÆ±ÈÁ²ÉÃ³ÆÃ²ÄÃ³ÃÁ²ÆÄ³ÇÄ±ÆÄ³ÈÆ³ÆÅ²ÆÄ¶ÇÇ·ÇÁ´ÇÇ±ÆÄ²ÈÃ¶ÇÃ²ÈÅµÅÃ³ÆÂµÆÄ³ÈÉµÃÃ¶ËÆ¸ÇÆ³ÉÅ³ÊÆ³ÉÉµÈÈ´ÉÃ°ÇÂµÈÄ³ÈÇ¶ÇÆ³ÇÃ³ÈÆ³ÈÄµÈÅ³ÊÆ´ÉÆ°ÇÄ³ÈÅ³ÊÅ´ÆÄ³ÆÁ³ÈÁµÇÃ³ÆÃ³ÈÈ´ÆÃ³ÈÇ·ÈÇ³ÈÇ²ÆÃ¶ÌÄ·ÈÆµÊÆ³ÊÄ³ÇÆµÈÆµÊÈ·ÊÄ¶ÆÊ·ÊÃ³ÊÈ¶ÈÇ´ÊÇ·ÇÆµÊÇ¶ÊÅ²ÅÄ³ÈÄ³ÆÆ´ÆÁ¸ÈÈ·ÈÅ·ÊÈ³ÈÇµÈÈ¸ÊÈ·ÈÇ·ÉÄ´ÉÆµÈÇµÊÄ¸ÊÇ²ÊÈºÈÈ³ÊÄµÆÁ²ÄÃ³ÉÈ¸ÈÈ´ËÈµÇÆµÊÇ³ÈÊ·ËÈ·ÉÆ·ÈÈ¸ÊÆµÊÆµÇÆ·ÇÄ³ÉÆ·ÊÅµÈÈµÊÁ·ÊÉ´ÈÈ¶ÊÇ·ÊÇ´ÊÇ³ÈÇ´ÊÆ·ÈÇ¶ÊÈ¸ÊÅ¸ÈÈ¶ÊÈµÈÄµÉÈ·ÈÈ¸ÈÊ·ÊË¶ÇÆ¹ËÈ·ÌÇ·ÈÊ·ÌÈµÊÈ¸ÈÈ¹ÌÈµÈÊ¸ÉÈ¸ÌË»ËÊ¸ÌÈ¹ËÇ¶ÌÈºËÌ·ÎÈ¸ÎÉ¸ÉÈºËÈ»ÌÊ·ÊÆ·ÌÈ·ÊÆ¸ÊÈ¶ÌÉ¸ÌÊ·ÊÆ·ÇÈ¹ÈÉ¸ÉÈ¹ÊÅ¶ÈÊºÊÊ·ËÅ·ÊÊ¸ÉÆ¶ÈÇ·ÊÈ»ÇÈ´ÉÈ·ÉÇ¶ÈÈ·ÈÄ¶ÉÇ·ÉÇµÉÆ·ÉÈ·ÊÆ³ÈÈ¸ÊÆµÉÈ·ÊÈ·ÇÆ¶ÈÆ¸ÈÆ·ËÇ¸ÈÈ·ÉÆµÊÆºÌÈ¶ËÈµÊÇ·ÇÈ¶ÌÄµÈÅ´ÈÆ¹ÈÇ¹ÈÈµËÆ³ÊÉ¶ÈÉ·ÉÆ¹ÊÇ¹ÊÈ¸ÉÅ·ÊÇµÊÇ·ÉÅ´ÇÇ·ÈÃ·ÉÅ¸ÉÉ·ÊÅ¸ÊÆµÉÃ¶ÈÄµÆÇ·ÇÃ¶ÆÆ·ÇÄ³ÈÂ·ÇÃ´ÇÄ´ÆÃ³ÈÆµÆÄµÉÃµÈÆµÈÄ²ÄÀ·ÊÈ°ÅÃ´ÇÂµÅÃ´ÆÄ°ÄÅµÆÅµÈÅµÆÄ·ÈÄ¶ÇÅ³ÆÃ´ÇÃ²ÄÃ³ÄÁ´ÆÂ³ÆÁ®ÇÁ³ÇÂ´ÅÄ´ÈÃ¶ÈÃ³ÇÁ­ÇÀ±ÃÁ³ÅÃ±ÅÁµÃÂ²ÆÂ±ÇÂ¶ÂÂ°ÆÁ²ÅÃ®ÆÀ°ÄÀ³Æ¿³ÂÅ³ÃÀ°Ã¾­Á¿®Ä»®Ã¿¬Ä¼¬ÃÀ³ÃÁ²Ã¿°ÁÁ²Æ¾®ÂÀ°Â¾²Á¼²ÃÀ¬Á¾´ÆÁ²Ä¿¬Æ¾¬Á»®Á¾¬Áº¬Á¼¬Á½­Á½¬Ã»¬Á»¬À¾­Á»®Á¿¬Á¾¯¾¾³Á½¯Ã¼¬¾¼®Á»­Á¼°Ã»­Á½¬À½­Â»«Á¼®À¼¬Ã¼«¿º¬Â»«¿¼¬À½¬½»¬Áºª¿¹­¾¸¬¼»¬Àº¨¾¹¬¼¼®½º¬Àº«¼¸¬»¹¨À¹ª¾³ª½¹ª»¶¯¾¼«¾·©¾¹®»¸¬¾º©¾º«½º«¾¹«»¸¥½·©½¹©¼¸ª»µ©ºµª½º§º¸©»¸ª¼µ¨»·¥º¹§º¶§½¸¨»·ª»·«»º©¹·©»»¬¹µ©¾´¨º¶¨»µª¼µ«¼º¨½·«¸·¥º´©¸·¨»¶¨»³¨½º§·µ©¹µ§»³¥»³¨¼²§¸¸©¹³©¸¸«¸µ¥·´£»·§·³¦¹µ¨·³¦µ³£·µ£¶³§»²£µ®¦·®¥µµ©·²¦º°£·²¥·°£·³£¶¬©·³¥º¶¥·²¤·²¤¹´¢·¬¥­³¦µ´©³¶¨¸³§·µ§µµ¬µ´©··¥³³¥µ²¦¶µ¤µ³§¹µ¤·µ¨µ³¨·²©¸µ©³³¤´µªº·¨´´ª´´©··£¶·ª¸¶ª¶·©·µ¦¹³©µ¶§¶´¤·³§¹³©·¶¬¶»ª»³©··¨µ·¨··©¹µª¹¶¦¸¸ª¹¸©¹·«¹·©¸¹¨¹¶¬·¶ª»·¬»´©··©»µ¬¹µ¬¸¹¬º¹«·µ¬»¶«·¹§º¸ª»º¨»·¬¹»­»µ¬½»­¹¸¨¾¸®·»¬¹·¬»»©¾º®¼º¬»·¯¹º­¸¹¬¼¾°»¾«»·ª»¾®º¹®»¾®¿¼®º»¬½º¬¾¼­¼¼¬½»±»º¬À»­¼¼±À»¬»¾­Àº°»¼°½¾©»¿°¾¹¬¾¾®¾»³¼»®Â¾¯¿¾³¾¿¯¿¾¯¼»±¾¹®À¿²Á¿¯À¾®À½±¿¾¬À»³Ä¿®À»°¿¾¯¾¾³Â¾³Ã½°¿¾­À¿±¾½²ÁÁ³½Â³ÁÀµ¿Â°ÁÀ³Á½³ÂÀ°¿¿²¾Á±Ä¾±Á¾²ÁÀ±Á½³ÁÀ¯ÁÃ°ÁÁ°Å¿¯¿À·ÂÁ²Ã¾±ÀÁ³¾¿±ÃÁ´ÄÀ³À¿³ÃÁµÄÄ¶Ã¿³ÄÁ³ÃÂ¶ÀÁ¶ÂÃ³ÁÂµÁ¾³ÃÁ²ÃÂ²ÁÄ´ÆÁ¶ÂÅµÂÄµÃÂ°ÃÂ³ÁÂ´ÃÃ³ÅÁ²ÃÃµÇÆ·ÅÂ³ÃÃµÃÃ·ÄÃ¶ÃÁ¹ÁÃ¶ÄÃ³ÁÆ³ÅÆ¸ÅÂ²ÆÆ¶ÅÃ¶ÃÈµÈÅ´ÆÃ³ÅÆ·ÉÇ¶ÅÁ³ÃÆ¶ÇÃµÄÂ´ÃÃ³ÃÆ¸ÅÄ¶ÆÃ¶ÆÃ·ÅÆ·ÆÃ¸ÇÄ³ÇÃ»ÆÂ¶ÉÈ¶ÅÇ¶ÇÆ¶ÆÄ±ÄÇ·ÈÃ·ÅÅ·ÇÆµÇÅ·ÆÄ¹ÇÄ¶ÇÄ¸ÆÃ·ÇÅ¶ÅÆ»ÆÆºÇÊ·ÊÇ·ÈÆ»ÅÄ·ÅÃ¶ÆÆ¹ÈÅ¶ÈÉµÇÈ·ÊÉ·ÇÆ·ÆÆ¸ÈÈ¹ÉÆ·ÈÆ·ÊÅ³ÈÉ¹ËÅ¹ÈÈºÆÉ·ÃÈºÉÅ¹ÆÈ¶ÅÊ»ÉÉ¸ÉÉ»ÇÉ·ÈÈ·ËÇ¹ÇÇ·ÈÈ»ÉÉ·ÈÆºÉÇ»ÉÇºÈË¸ÊÊ»ËÉ¹ÈÊ»ÊÊ¼ÉÈ¹ÈÍ¹ÇÈ»ËËºÉÉ¹ÇÊºÆÈ¼ÊË¼ÍÊ»ÊÇ»ÊÊ»ÈÊºÇÅºÊÌ»ËÍ»ËÊ¾ÌÇ¹ÈÌ·ÈÊ»ÈÊ¼ÈÈºÊÊ¾ÉÇ¹ÈÈ¾ËÍ»ÇÊ¾ËÌ»ÈÈ»ÈÊ¾ÊÊ·ÊË½ÌÊ¸ÊÊ¸ÈÇ¸ÈÂ·ÉÌ¸ÉÊ»ÊÉ»ÈÌ½ÌËºÉÌ»ËÊ»ÌÊ¼ÊË»ÊÊ¹ÉÆ»ÉË½ÌÎ»ÇÊ¼ÈÍ¼ËÌºÈÎºÎÌ½ÊÉ¸ÍË»ÊÌºËÆ»ÌÇ¶ÊÇ»ÈÌ¾ÊË»ÈÌ½ÊÊºÌÌ¿ÍÌ½ÊÉ¼ÊÊ»ÊÍ½ËÌ»ÉÊ¼ËÊ¼ÊÊ»ÉÌ½ÎÊ¿ÊÊ»ÊË¹ËÆ¸ÆÆ¹ÊÊ¾ÊÊ»ËÌ¼ÈÊºÍÊ¾ÊË¾ÈÍ¼ÌÉ»ÎÌ½ÈÊ¾ÌË¾ÎËºÉÊ¾ÊÎ¼ËÊ¾ËÌºÊÌ¼ÉÌ½ÌÊ¾ÌÊ¾ÈÍ»ÊÈ½ÈÉ¿ÌÌ»ÍÌ¼ÊÎ¼ËË¼ÈÊ»ÌÈ¾ÊÎ½ÌÊ½ÈÍ¼ÌÌ¾ËÎ¾ÌÊÀÍÌ½ËÎ¾ÇÌÀÌÌ¼ËÌ¼ÊË¼ÌÏ¾ÉÌ½ÌÌÀÏÌ½ËÐÂÌÎÂÎÌÀÌÎ¿ÍÌ½ÍÐ¾ÐÍ¾ÎË»ÎÎ¾ËÊ¼ÈÍ¼ÉÌ»ÊÌ¾ÌÊ¿ÎÌ¾ÉÌ¾ÌÌÀÊÊ¾ÊË¼ÊÌ¼ÊÊ¿ÊÌ½ÉÌ½ÎÌ¾ÌÍ¾ÌÍ¿ÊÌºÈÌ¾ÊÌ½ÌÎ¾ËË¾ÌÈ»ËÊ»ÊÈ¿ÈÉ»ÈÌ»ÊÊ»ÊÌ»ÌÌÀÊË»ÊÍ¾ÊË¾ÊÉ¹ÊÊºÉÌ»ÉÊ¾ÈË½ÈÊ»ÊÌ¾ÍÌ½ËÊ½ÈÌ»ËÊ¾ÌË¾ÆË½ÉË¾ÌÎ»ÊÍ½ÌÌ½ËÌ»ÉÎ¾ÈÊ¾ÊÌ»ÈÈ½ÊÈ¿ÊÌ¼ÊË¾ÇÈ¼ÈË»ÈË»ÊË½ÌÊºÆË¼ÊÎ¾ÊÇ»ËÈ»ÊÌ¾ËÆ¼ÌÆ»ÇÉ»ÊÉ½ÊÊ»ÎË¼ÈÈ¹ÈÊ»ÈÉ»ÇÌ»ÈÉ½ÊÊ¼ÈË»ÌÊ»ÇÊ»ÇÉ»ÉÇºÈÆ¹ÆÇºÅÈ¾ÉÈ½ÆÈ¾ÈÇ¹ÈÇ¸ÇÅ¹ÇÈºÈÈ·ÈÇ»ÊÅ¹ÇÈ·ÃÇ¸ÅÈ»ÆÈ¹ÇÇ·ÆÂ¸ÅÇ¸ÆÆ·ÅÆºÆÈ¸ÅÅ·ÃÂ·ÉÈ¶ÃÇ¹ÃÂ»ÃÈ¹ÂÃ·ÆÅ»ÆÆ¸ÆÄ¶ÅÆ·ÅÃµÄÅ·ÆÅ·ÃÃ¶ÃÃµÄÃ·ÁÆ¶ÆÂ¶ÄÅ³ÃÄ¶ÂÂ³ÆÃ¶ÂÁµÅÆ·ÃÅµÃÂ¶ÄÃ¶¿ÃµÁÃ´ÁÁ´ÃÁ³¿Â¶¾Â·ÃÀ³ÁÁ¶ÃÃ³Â¿³ÂÀ´ÁÃ´ÀÀ±ÃÂ´ÁÃµÁ¿°ÁÀ³ÅÂ´ÃÁµÁ¾µÀ¿³ÁÁ³Á¾¶ÀÀ´ÀÂ´Á¿¶Â¼µÀ¿²ÂÀ³ÂÀ´¾¿¯ÁÁ°¿¾±Â¾³¼¿³Á½´À¿³¾À³À¼°À¾±ÁÀ²¿½²¾¿°¾¼±¾¼°¼»°¼¿±½¾¯½¾®À¼°¼¼²½½®¿¼²¿¼±¿¾±¼»¬½»®¾»¯À¾¯½¾®¼¾¯¼»±À»±¼»¯¾¾³»¹¬º¼²»½±¾¿¯½º³»·°¾½°¾»¬¾½°»¼­¼¹°½¾±¾»¯½¼®¹¸¯¼¼±º¹¯º·®¾¹²¼»²»·°»¾¯»º«½»¯¹»±»¼¯¼º¬·»­»¼¯½º°º¸¯º·¬º»­º´¬»¸¬·¹¬¸·­¹º¬··«¹·©··ª·¶¬µ»°¹·¬¸¸©¶¶«·´¦¶¹ª¸µ¬¶º«¸·¯»µ¬·¹§»¶¬¶©°®¢µ®³¯¢³¯µ¯´°µ°¸³·´ ¶¯ ·¯²³´¯ ¶®¢µ²¡·³¤·®¶®¢¶²£º²¢·²¶³¡¸²¡¸²¢º®£¸­£¸³¢·³¢·° ·²¥µµ£¸³ ·±£´³¸´¥¸µ§»³·²£¹¶¢·´£¹±¤·³·µ¥¸µ¤º¶¡¸´¡¹³¦¸³¤»´¦¹²¤»´©»µ¥¹³¢»³¥º·§»µ¡¸¶§º³¡»´¤¸µ¨»·£»³§»·§ºµ¥»³¦¸³§º³¥»µ¤¸µ§»³ª»·¦½·¨¼´¦»µ£»·¦½¶ª½º§»¶§¼·¨»¸¦¾¸¦½¹§¼·¨½¹§»·ª¼¸¥½º¥½¸¨¿·©½¹¨¾·ª¾º¤¼·¨»»¦Á»§¾¸§À¸¤¾¹§¿¹ª¾·ªÁ´©¿·«½½©½¹¬Â¸«¿»©¿·«¾»­Á»¨Á½¬À»«Á½¬Á»©¿¹¬¾¼§Á¼¬Â¼ª¾½¬¿»«À»©¿½«Â»­Á¾©Â¾®Áº¥Àº®Ã¼¬ÁÀ«¿½ªÁ¾¬Á½¬Ã¿®Â»­Á»¬Ä¾©Á»¬Ã»¬À»«À¾¯Á½¬Ã¾¬Ã»¬Â¾­Ä¾®Â½­Ä¿¬Ã¾°Ã¾®Ã¾®Á¾­ÃÀ¯Å¾°Ã½«ÂÁ­Ä½®ÆÀ³Ç¾¬Ä½¬ÃÀ®ÅÀ°ÆÁ®Á¾¯Ã¼®ÂÁ®ÃÀ­Å¿¯ÁÁ°ÇÁ²Ã¾­Ã¿°ÃÃ®Ã¾°Ã¾¯ÄÀ¯ÄÃ°ÃÀ­ÈÂ²Ã¿±ÃÃ³ÆÄ¯ÄÁ¯ÇÂ°ÄÀ®ÅÁ±ÃÁ­ÃÀ­ÃÁ°Æ¿²ÇÃ®Æ¾µÁÁ®ÄÂ³ÇÁ³ÆÁ±ÄÁ°ÅÄ¯Ä¾±ÆÁ¬ÄÃ²ÆÃ´ÈÀ±ÆÁ°ÅÃ±ÆÀ²ÇÃ°ÆÃ¯ÄÁ²ÇÁ³ÄÅ°ÆÁ²ÇÃ³ÆÂ³ÆÂ³ÇÃ°ÇÃ°ÆÁ±ÆÃ°ÉÃ²ÆÃ°ÈÃ³ÈÂ²ÅÄ±ÉÂ´ÈÃ´ÇÄ¯ÆÃ³ÊÆµÈÄ³ÊÃ²ÄÃ±ÆÄ³ÈÆ¶ÈÄ²ÈÄ³ÉÄ´ÊÄ¶ÊÆ³ÅÅ³ÈÅ³ÈÄ·ÅÃ¶ÊÃµÉÅ³ÈÅ¶ÅÆ³ËÄ°ÉÇ´ÆÆ¶ÉÆ¶ÆÄ³ÈÅ´ÌÇ³ÇÄ²ÇÃ³ÊÇ³ÆÇ¸ËÆ·ËÅµÇÇ´ÇÆ¶ÇÈ¶ÊÄ·ÈÂ³ÇÇ¸ÌÈ²ÆÆ³ÈÆ¸ÉÆ·ËÆ¶ÎÅµÊÆ²ÉÂ´ÆÄ¸ÇÄ³ÇÇ¸ÉÅµÆÆ´ÈÆ·ÇÈ¸ËÈ¸ËÆµÇÆ¶ÌÈ·ÊÆ·ËÈ¸ÎÇ¸ÊÆµÈÈ´ÊÄ³ÈÅ±ÈÄµÊÆµËÆ´ÈÆ´ÉÈ¸ÊÇ·ÊÈ¸ÊÆ´ÉÈ´ÈÅµÆÄµÊÇ·ÊÊµÊÇ¸ÎÈ·ÉÆ·ÊÊ¸ÌË·ËÆ¶ÌÈ·ÌÊµÈÈ³ÈÄ´ÊÈ³ÈÆ¶ËÈµÊÇ·ÇÈ·ÈÊ·ÊÄºÍÆ³ÇÇ·ÉÈ·ËÊ·ÊÊµÊÅ¶ËÊµÈÄ·ÊÈ¹ÉÅ³ÊÆ±ÆÇ·ÇÄ·ÉÉ¶ÊÉ·ÎÅ¹ÌÈ´ÊÈ¸ÌÈ¸ÉÆ·ÉÊ¸ÊÇ·ÊÊ´ÌÊµÌÈ³ÌÈ¶ÌÊºÊÈ·ÌÈ¸ÊÈµÊÆ·ÊÆ·ÈÈ¶ÇÈµÌÈ¶ËÈ¸ÊÇ·ÌÄ·ÆÊ·ÌÈµÏÈ¹ÊË·ÊÌ·ÎË·ËÊ·ÌÆ¸ÊÊ·ÎÈ·ÈÊµÌÇ¶ÊÊ»ÍÈ·ÌÌºÈÅ¸ÊÈ·ËÈ¸ÌÈ·ÊÊ·ÊÊºÌË¹ÎÉ¸ÌÊ¸ËÎ»ÊÊ»ÍÊ·ÌÈ³ÊÇ´ÌÇ¸ÌÈµËÊ·ÊÊ¸ÌÈ¸ÌÈ·ÊÈ¶ÉÆ»ÊÊ·ÌÊºÊÆ¹ÐÈ·ÈÈ¹ÎÌºÍÈ¶ÌÉ¸ÌÈ»ÌÉ¸ÇÈ»ÊÊµÈÈ·ÈÇ·ÏÈ·ËÉ¼ÎÉ³ÈÈ´ÉÈ¸ËÊ¹ÊÄ¹ÊÇºÈÊ¸ÎÊ¶ÌÉ»ÈÇ»ÊÆ¶ÈÉ¸ÍÈ·ËÈ·ÊÈ¶ËÊ»ÉÈºÊÆ·ÊË¸ÈÊ¸ËÉ¸ÈÉ¸ËÇ¶ËÆ¸ËÊ¸ÊÈ·ÈÄ·ÌÇ·ÊÈµÇÆºÊÈµÍÈ·ÊÈºÉÉ¸ÊÆ³ÊÆµÈÇ·ÊÈ·ËÈ·ËÆ»ÈÃµÈÆµÊÆ·ÉÆµÊÆ·ÈÆ·ËÃ¸ÈÈ·ÉÄµÈÅµÉÇµÈÇ·ÈÆ¶ÊÆ·ÊÆ³ÉÃ·ÈÈ¸ÊÄ·ÇÆ³ÆÆ³ÊÃ¶ÈÆ³ÈÆ¶ÆÆµÇÃ³ÇÂ³ÆÄµÆÄ¶ÉÃ¶ÆÅ´ÈÄ³ÆÄµÈÅ³ÈÃ³ÆÃ±ÉÄ´ÅÃ¶ÈÁ²ÆÃ³ÉÃ¶ÇÄ³ÆÁ±ÅÁ³ÅÃ³ÆÄ³ÃÄ³ÂÁ°ÂÃ³ÈÂ±ÅÁ´ÃÀ¯ÆÂ³ÈÃ³ÂÀ°ÆÁ³ÃÃµÄ¿²ÄÁ°ÆÀ®ÅÁ±Ä¿±ÃÀ°ÃÀ®ÅÃ±ÁÃ±Å¾²ÄÁ®ÃÀ²Å¿°ÅÁ®Ã½±ÃÁ°Å¾¬À»­Ä¾¬Á¾®¿¼°Ã»®À»¬¿Á°Ã¾¬Ã½®Á¾­Á½±Ã½¯Ã¼®À¾²Ã»®Ã¾±Á½­Ã¼¬ÂÁ­Ä¾°ÂÀ¬Ã»¬Á¾®Á¾¬Â¹«À½®¿»­Á»ªÁ½®Á»­¾¼­¿»¨¾»­¾º®¾½¬¾º¬½º®Á½¬¾»­¾º®¾»©½»«»»¬Á»©¾¸¬¾¸®¾¸ª¾»¬¿º¬½¹ª½º«¾º¬»º¬À¹©»ºª»¹ª¾»¨¼¸«½»©¾»¨¼»«½¶ª¼¹­»¸ª¾¸¬»¹«¾·«¾¸©¾»«¾»ªÁ¸¬½·­»·ªÁ¶«»¸§¾º¬º·ª¼·§¸»¦»·ª¾¸¨»·©¾ºª»¶«»¶©º¸¥¼·§½¶ª¼¶ª»µ¥¸·«»µ¥º·¦»µ£¸´¨º³£»´§»´§·²¦ºµ¨º°¥¹´¨¹¶¦º·©º³£¸²£¶µ§¸°¨·´¦·³¦¹´¥¸µ§·µ¦·³¢·µ¥º­¤°³¦µµ¨¶¶©´³¬·³¦¶·¦¸²¨µ¶¨¹¶¨·³¥¶¶¤µ·ª¸·¥··©··¨¶¶¥³¶©µµ©¶µ¦¶³©¶¶¨·¶«¸´©¶·¨¶µ¨¹¶©º¸¦¶¶¬¹¹¦··¬¸¹¨¹·§¶µ¬¹»¬¸¼¬·¶©º·ªµ»«¹·©»·­»·ª¸º¬¼ºª·º©»¸¬»¸¬»·«»·ª»¹¬»»©·»¬¾·¬¸»¬¹º¬»¹¬¼¶©¹¹­¼¹¨»·¬º¶¬»º®¹»¯»¸®»¶«º¹¬»º­¼»¬¾½¬»»¬»¸¯¾»©¼»¬¿º¬¾À¬¾¼¬»·­¿¾¯½½°¿½¯¾»®½½±½¼­¾º­»½¯¿¸±»½°½¼­»½®Á¾­¾À°¿»°½¾°¿¿®¾»²¿¾¯¿Á­À¿¯»À¯¿½¯Â¾¬¼¼®¿¾³Á¿²Á¾®Á½°ÁÁ®¿¼°¿¿°Á¿­¾Â°Â¾³¾¿³ÃÀ±À¿²¿½¬¿Á²ÀÀ±ÁÂ¯Á¿²ÃÂ¯ÂÀµÄÁ°ÃÁ³ÃÂ´ÁÁ¯ÁÁ³ÅÀ±ÀÁ¯Á¿±ÁÁ²ÁÃ³ÁÀ´ÃÁ³ÃÁ²ÂÁ³À¿¯ÂÃ¶¾Ã³ÆÁ´ÃÁ²ÀÁ³ÆÃ°ÃÄµÁÃ·ÆÅ´ÅÆ·ÅÃ³ÅÁµÄÁ³ÆÆµÅÃ³ÂÃ¯ÃÂ³ÁÃµÇÁ³ÅÄ¶ÆÆ¶ÄÅ·ÃÁ±ÄÃ¶ÃÅ´ÆÅ¶ÄÂ¶ÃÄ³ÆÆ³ÅÄ¶ÆÃ´ÆÆ·ÈÁ·ÆÃ´ÄÇ²ÆÁ´ÃÇ¸ÈÅ³ÅÅ´ÆÃµÈÂ³ÂÆ¶ÈÄµÇÈ»ÆÇµÇÅ¹ÆÅ·ÂÃ³ÃÃ¹ÃÄ¶ÆÇ¸ÇÃ·ÄÈ´ÇÈµÇÈ¶ÆÇ¶ÄÅµÅÅµÇÂ·ÈÅ³ÆÆ»ÈÅ·ÆÆµÅÇ·ÆÆ·ÇÃ¹ÆÈ¶ÇÂ¹ÇÈ¶ÌÈµÈÅ¹ÅÈ·ÆÊ¶ÈÄºÉÆ·ÆÈ·ÇÊ¸ÊÇ·ÌÆ¹ÈÈ·ÈÈ¸ËÉ¹ÆÊºÆÆ·ÇÊ·ÈÈ¸ÉÆ¹ÊÇ·ÈË·ÆÇ»ÊÌ»ÈÇ·ÈÉ¸ÉË¹ÇÇºÆÇ·ÈÊ¹ÈÊ·ÊÈ·ÊÊ¹ËÌ½ËÊ»ÊÈ¹ÆÈ·ÈÇºÆÊºÌÈ·ÇÊºÉÉºÊÊºÊÈ·ÇÉ»ÌË¹ÉÈ¾ËÈºËËµËÉ¼ÈÌ½ÌÌ¸ÈÈ¼ËÊ»ÊÈ»ÉÌ¹ÌÈ¾ËÌ¾ÌË¼ÌÊºÈÌºÌËºÌË¼ËË¹ÊÊ¸ÊÌ¾ÌÊ»ÌË»ÇÊ¹ÊÈºÆÊ½ËÈ·ÈÆ¹ÇÈ¹ÊÊ¼ÆÌ»ÌÍ½ËÌ¼ÈÉ¾ËÍ»ËÌ¼ÍË¾ÊÏÀÏÌ¾ÈÊ¼ÌÎ·ÊÊ½ÊÊ»ÈÊ½ÌÍ½ÊÊ¿ÊÊ¼ÐÎºÌÌÀÈÉ½ÊÌºÊÈºÈÈ¹ÈÎ¾ËË¾ÌÊ¾ÊÎ»ÍÏ»ÎÐÂÍÏ¾ÊÐ¼ÎÍ¿ÎÎ¼ÌÍ»ÍÌ¾ÍÊ¾ÈÌ¼ÌÎ»ÌÌ¼ÊÌ»ËÎ¶ÊÌ¾ÊÌºÈÎÀËË¼ÊÌ»ÌÎÁËÌ¸ÈÉ¼ÉÌ¿ÈÍ½ÎÎ»ÐÉ¹ÉËºÉÌ»ÇÎ»ÌË½ËÈºËË½ÌÌ»ÉÊ¼ÍË¾ÊÐÀÍÌ¾ÍÍ¾ÊË¾ÌÌ»ÌÌ¼ÊÏ»ÊÊ»ÊÊ¿ÊÎ¼ÈÉ»ÊÊ½ÌÍ»ËÍ¿ÌÎ¾ÊÍ½ÌÐ¾ÍÎ¾ÌÌ¿ÌÎÀÌÌ½ÍÐÁËÐ»ÐÍ¾ÍÍ¾ÎÎÁÊÎ½ÌÌ½ÍË¼ÎË¾ÌÌ¾ËÏÂÍÎ¾ÌÐ½ÏÑ½ÌÌ½ÍÐ¼ÊÐ¾ÎÎÁÍÍÁÍÌÀÊÊ¿ÐÐ½ËÌ¾ÌÐÂÑÌ¾ÊÎºÍÌ¾ÌÍ¿ÎÎ¿ÌÌ¼ËÈ¾ÍÎ¼ÊÍ¿ÏÌ¾ÌÌ»ÍÑÂÍÌ»ÎÍ¼ÌÌ¾ÌÎÁÌÏ¾ÍÎ»ÌÍÁÐÎ»ÌË¾ÊÊ¼ÌÊºÇÍ¿ÍÌÁÌÌ¾ÉÈ¼ÊÊ¾ÊË¿ÌÍ¿ÊÊÀÌÍ¾ÊÎ¼ÊÏ½ÌÎ½ÌÌ¾ÌÍ¿ÊÊ¾ÍÌ¾ÊÎÁÉÐ½ÌË¼ËÍ½ÌÌÁÍÎÀËÍ¾ÌË¼ÌÍ¿ÊÌ½ËÊ½ËÎ½ÌÍ¾ÊÎ¿ÎÊ»ËÈ¹ÊÍ¾ÍÌ»ÊÍ»ÊÊÀÊÌ¿ÌÌ»ËÊ¾ÍÌ¾ÌÐ»ÌË¿ËË¼ÊÊ½ÊÊ»ÈÌ½ÊÊ»ÆË¾ÊÌ¼ËÌ¼ÈÌ»ÌÊ¼ÈÉ»ËÌ¸ÉÊ¾ÌÉ»ËË¾ÈÉ½ÊÊºÉÌ»ÇÉºÈÊ¼ÆÈ»ÈÈ½ÈË¹ÉÈ¼ÊÊ»ÉÈ¸ÊÇ¹ÈÌ¾ÅÇ¶ÇÈ»ÈÈ·ÇÊ»ÉÇ»ÊÈ»ÉÈ¹ÈÇ¹ÇÉ¹ÅË¼ÆÊ»ÈÈ»ÆÇ·ÈÆ¸ÇÅ»ÅÃ»ÆÇ·ÃÈ»ÄÈ¹ÇÈ¸ÆÆ¸ÉÆ·ÆÆ¸ÆÃµÆÈ·ÇÅ¸ÆÇ¶ÆÆ¶ÄÃ»ÆÆ´ÅÆ¸ÆÆ¸ÃÆµÅÁ·ÂÇ·ÈÄ·ÆÄ¹ÄÃ¸ÆÅ¶ÃÄ¶ÆÃºÆÄ·ÅÄ¶ÆÃ´ÃÁ°ÄÃ³ÁÂ¶ÃÄ¶Ã¿´ÂÂ³ÆÁ´À¾·ÅÂ³ÂÃ²ÂÃ¶ÃÁ¶ÃÁ¶ÃÃ·ÅÃ³ÂÁµÂÂ³ÅÀ³ÀÃ¶ÆÅ¶ÁÃºÁÀµÂÁµÃÁ³ÅÃ¶ÄÂµÄÁµÃÃ¶ÁÀ¶ÁÂ°¿Á³ÁÁµÂÀ±Â¾°¾¿¶Ã½³ÁÀ³ÀÀ²ÁÀ±ÃÃ³»¿±Á½°¿¾±¾Á³¿»­½À­À¼³¿¿²Á¾³À¼°¿Áµ¾½³¿½¯½¼³ÀÀ¯¾¼±¾¼µ¼»­¿»¯¾¾±½»°»¿°¾»­¼¿³¾¼°¿¼±¼À°¿Á°Á½°¾½³¿½±¾¾²À½±»»°¾¿¯½»°Á¿¯»¼°½½®¿»®¿¿¯¼½°¼¾¯¼º®¾Á±»½­½¾­¾»®»»¬¼ºªº»®¼»¬»»±»¹¯»º¨»¸¬¹·¬»·¬·¸¬»¸®¹¹¬»¸¯¹·­º»¬¹ºª¹º«··®º»¬¹´¬¹·¨º¹ª··¬¸¸­º¹­¹¹¬¸»«··¬¸©¡²­£³°³²£·°¡·° ·°£·±£·²¢µ² ·¯¶³£¸®¤¸²£³³£¶¯£·³£¹² ·²£¶² ¶³ ¶®£·°£µ³ º°¢µµ¸³ ·³£¸²¥·²¤¹±·³¡·´¡¶µ¡º²£¶µ¢·´¡¾³£º²¤¹´¥¹³£¸´¤¹´¤·µ¥»··³¢¹³§»·¨¹¸©·¸¡»·£¹µ§··§¼µ£¼µ¤¸¶¥¼º¨»·¦»¸¤¾³¥¹¸¥¾µ¥¹µ¥º¸©¾·¨¼·£»µ§½·¥»·§½¸¦¸µ«¾·©»¸§¾¶¨¼·¦»¸ª¾·©½·¦½»©¾¸©¾»©»¹¦»¸¦¿¸«¼¸¦¾´§¾¸ª¿¼§¿º«¼ºªÁ·§¿½¨Â¸¬¿·©À¼¥¼ºª¿¾«¿º¨¾¹ªÂ¹©¾¹©Âº©À»«Ã·©¾»«¾¹«Ã»©¾»°À½¬Á½ª½½­¾º­Á»«Â»«Á»¬¿¼«¿½¬Â»®Á¾ªÀ¾¬Ä»¯Á»©Ä»¬Á»¯Ä»¬Ã¾¬Â¼¬Á¾­Ã¾¬Â»©À»«Â¾®À¾®Å¾­Ã½«Ã¾¯Â¾­Á¿°Ç¾®Ä¾­Ä¿¬ÂÀ¯Á½²ÂÁ°ÆÂ®ÃÀ¬Ä½®ÆÄ¯ÃÁ®Á½¬Ä¿°ÁÃ­Æ¿®Ä¾¬Â¼¬ÆÃ±ÅÁ­Ã¾¯Ä¾³Ã¾¯ÆÂ³ÇÀ®Ç¾°ÆÁ¬Ä¾³ÃÁ±Æ¾±ÄÁ°ÇÃ¯ÃÃ®Æ¾°ÇÀ°ÄÁ°Å¾°ÃÀ¬ÅÁ°ÉÃ¯ÈÀ²ÅÅ²ÉÀ¯ÈÃ³ÆÃ²Æ¾±È¾³ÄÁ®ÅÁ­ÄÁ¯ÇÁ²ÆÀ¯ÅÂ³ÇÁ³ÆÃ²ÇÁ³ÈÂ³ÈÁ²ÄÂ²ÆÃ²ÊÁ°ÊÅ°ÆÃ³ÉÃ°ÄÂ³ÇÅ±ÇÃ³ÈÂ°ÈÂ³ÌÄ±ÆÄ³ÆÂ³ÆÁ³ÇÂ³ÅÆ´ÈÆ³ÇÄµÆÂ²ÊÆµÈÃ³ÉÁµÇÄ²ÇÅ³ÈÆ¶ÊÂ³ÆÅ³ÊÇ´ÈÄ³ÈÆ¶ÈÃ³ÈÄ´ÇÄ³ÇÄ²ÈÂ²ÈÆ·ÆÃ´ÈÃ°ÈÄ³ÇÈµÈÆ³ËÆ¶ÌÆ´ÈÆ¸ÈÅ³ÇÃ²ÊÅµÊÆ²ÉÆ³ÉÅ³ÊÆ³ÊÆ·ÍÅµÊÆ³ÉÆ³ÈÄ·ÈÄ¶ÌÄ³ÇÃ²ÉÇ¸ÊÆ·ÊÆµÈÄ¶ÊÈ³ÈÊ·ÌÄ·ÊÉ³ÌÇ¸ÌÇ»ËÇ·ËÅ´ÇÊ¸ÍÊ·ÊÆ¸ÌÆ²ÈÆ³ÌÇ·ÈÇ´ËÇµÊÈ·ÈÆ³ÊÃ³ÈÃ³ÅÈ¸ÇÇºÊÊ¸ÈÇ³ÊÇ·ÊÊ¸ÊÉºËÉ·ÊÈ»ÌÊ¶ÊÊ·ÊÇ¶ÊÅ´ÊÇµÉÆ·ÊÊºÍÊºÍÉ¸ÊÊµÇÄ·ËÇ¹ÇÈ¶ÊÈ±ÊÆ·ËÇ»ÌÅ¶ÌÊ¸ÊÈ·ÏÌºÌÌ¸ÏÊ»ÌÇ·ÌÊ»ÌÉ¸ÊÈ¶ÌÈ´ÎÉ·ÊÅ¸ÌÈºÌÊ·ËÇ±ÊÉ¶ÊÆ¸ÊÆ·ÈÇ´ÊÈ·ÊÉ¸ÊÅ·ÍÌ¸ÍÉ¹ÌÈ·ÌÇ»ÊÊ¶ÆÄ³ÊÄ·ËÉ¶ËÇºËÈ·ÌÇ´ÉÆ¸ËÉ¶ÊÊ·ÍÉ¹ÌÌ·ÌÊ·ÌÊ·ÌÇµÎÇ»ËÌºÍÎ·ËÈ´ÈÉ¹ÍÇ¶ÊÆ·ÌÈ¹ÌÈ·ÍË·ÌÇ¸ÌÈµÌÅ·ÍÊ»ÎÎ¼ÏÊ¹ÊÍ»ÌÊ¼ËÊ»ÌÊ»ËË¼ÎÍºÊÈ·ÌÈ¹ÉÊ·ËÌ»ÐË»ÌÊ·ÌÉ»ÐÍºÍÊ¼ÎÌ»ÍÊ¼ÌÎ¸ËËºÌÊ»ÍÈ»ÍË¾ÌÌ¹ÌÊ¹ÎÈºËÊ»ÌÈ¸ÍÌ¼ÌÇ¸ÌÊºÎË»ÊÎ¸ÍÉ¸ÌÌºÍÌ»ÊËºÎÉ»ÊË¼ÌÌ¹ÌÉ»ÌÉºÌÈºÊÊ¸ÊÊ¸ÌÈ»ÏÇ¶ÊÈ¶ÊÇºÉÈ¸ÈÈºÍÇ¹ÌÉ»ÌÈ¹ËÊ¹ÎÆ·ÌÈ¹ÊÉ¼ËÉºËÊ·ÊÊ»ÊÌ»ÍÊ¸ÈÎ»ÊÉ¸ËÆ¸ÊÈ»ÊÊ¶ÊÊ¹ÌÈºÌÊ¶ÉÈ»ÌÈ¸ÊÈ¸ËÆ»ÈÊ·ÊÆ·ËÉºËÊ»ÊÇ·ÉÆ¶ÊÉ¶ÍÆ·ËÇ¹ÊÈµÌÇ¹ËÈ´ÈÆºÊÊ·ÊÈºÇÊ»ËÇ»ÊÇ·ÌÆ³ËÈºÎÇ¸ÉÈ·ÉÇ¶ÉÈµÈÆ·ÈÆµÊÅ´ÈÆ·ÊÈ·ÊÈ»ÉÈ·ÈÈµÊÆ¶ÌÈ·ÈÅ·ÌÆ´ÇÊ¹ÌÇµÈÈ¸ÇÆ´ÇÅ¸ÆÂ´ÆÁ³ÆÇ·ÈÅ´ÈÁ³ÈÄµÈÆµÊÄ³ÇÃ²ÆÆ³ÉÆ´ÆÃ³ÆÁµÇÄ³ÈÄ³ÆÃ´ÆÂ²ÄÄµÈÅ²ÇÁµÇÅ³ÅÂ¶ÆÃ³ÇÃ³ÅÄ²ÆÅ´ÆÄ²ÆÃ³ÇÁ¯ÅÂ´ÄÃ±ÆÃ¶ÆÂ³Ã¾±ÅÃ²ÄÁ±Â¿°ÈÁ³ÄÁ°ÅÃ±ÄÁ²ÆÃ²ÆÀ²ÃÂ²ÅÁ´ÆÀ®ÂÀ¯Ã¿±Ä¿¯Á¾°Ç½°Ã¾¬Ã½¯Á¿­ÃÂ®Ã¿±Á¿®Ã¾²Á¾°Â½°Æ»®Á¾±Á¾²Ç¿°À½°Á¾²Ã¾±ÀÁ±ÃÀ°Ã¿±¿¾°Ã¼°Ã¾°¾½°Ã½°Á½±Á»¯À»¬Á»¬Ã»«¾»­Á¼²Ã»¬À¼®Â¼­Á½®¿»¯¾¾«¾º­¾¾«¿º­Á»©¿»©¿»¬¿»®Àº­¾¸«¾º¬Á¹ª¿½©Á»«»·­¾»«¿»«¾¼¬»¸¬Àº¬¾¹¬¾¸©¼¸¬¾·¬Áº«½º®¿½¬¾»°Àº¬À·§»¹«»»­¼¹¬¾º®»¸«¾·ªÁ»¬½¸«½·«¼ºª½¸¬¼·©À¸®»»®»¶§¼·ª¾·©ºµ©¼·¨ºµ©¼µ¨»·©¾µª»´¦º·¨¹·¦¸·ª¸·¤º·§¸³©»³§¸·¦»´¦¹·©¸³§¹´¦»´©¸´¥º´©¸¶«·²§¹´§»³©·´­ºµ£º²¨º¬¨±²ª»³§··§¶´¬µ·©¹¹§¹¶©µ´¬¸µ§¸´§¸³¬·µ§´¶§¶¶¬¹¹¬¹µ¬¹·§¹¸¨´¶¨·´¦¸·ª¶³«¹¹©»¹ª¹¹ª·´¬¸·ª·¶§¸·§¹´§¶·ªº¶§º·©»º¬º¶¬··¥¸·©··¦¸º¬»·©··­¹¸¬º·§·¹¨¹º¬º¹©»½¬¹·¬¹¸®¼¼ª¹¹§½¹¬»¹®¾»°¸·¬¼»¬¹¸®¼¹¬»¹¬¹¸­»¸¬»»ª½»«º·¯¼»ª¼»­»·©¾¾­¾¾®»»¬À·®»½«½»¬¼»¬À½­¼¾¯¼¾¯À¼°½»±À¼®½¾®¾¿¬½»¯À»¯¾¾­Á½°¿¾¬Á¾¬»¼±¾¿¯ÁÂ¯¼»°Á¿°À¿´¼¾¯¾¿®ÀÀ±¿Á±Á¾¯¿¾°À¾³¿½µÁ¿¬¿½®¿¿¯¿Ã°À¾¯¿¿°ÁÂ±Á¾²ÁÀ²ÃÁµÃÂ°ÃÃ´¿¿°ÁÃ°Â¾²ÂÀ³ÀÂ±ÃÁµÃÁ®Â¿µÁ¾±ÂÂ¶ÃÃ´ÃÁ³ÄÁ³ÄÁ³Ã¾´ÆÁ²Â¾°ÁÃ²ÂÄ¶ÂÀ°ÃÂµÃÄ¶ÁÁ´ÆÂ³ÁÄµÅÀ±ÃÃ³ÂÅ²ÅÁ±ÂÃ¶ÆÃ³ÃÄ·ÅÃ¶ÅÃ´ÃÅ³ÅÂ¶ÂÆµÇÂ´ÃÂ¶ÄÄ´ÅÅ±ÆÃµÆÃ´ÃÅ¶ÃÂµÈÆ¶ÅÇ´ÈÃ·ÅÆ¶ÃÄ¹ÆÃ³ÆÇ´ÃÃ·ÆÅ´ÈÇ´ÆÄºÊÆ¶ÃÃ³ÅÆ·ÂÃ³ÅÅµÈÇ´ÇÅ¹ÆÊ¶ÆÆ´ÈÅ³ÅÆµÈÉ´ÇÆµÆÄ³ÆÆ·ÈÅ·ÇÆ³ÆÆµÇÄ·ÈÆ¹ÄÅ³ÊÅ·ÆÈµÆÄ³ÅÇ¶ÈÆ¶ÈÈ·ÈÆµÈÇ¶ÇÆ¸ÆÆ·ÉÆ´ÅÆ´ÈÈ·ÈÆ¶ÊÈ·ÆÆ¹ÊÈ¸ÇÆµÈÈ·ÉÈ¹ÉÈ¶ÈÆºÅÌ¹ÆÊ¸ÊÇ»ÈÆ·ÈÊ»ÈÈ¹ËÈ·ÈÉ·ËÉ»ÉÊ»ÊÊ·ÊÉ¸ÆÈ»ÌÉ¶ÊÆ¸ÇÊ·ÈÈ¸ÊÇ³ÇÇ¸ÈÈ·ÉÈ¹ÈÈ¶ÉÇ»ÊË»ÌÈ¸ÊÌ»ÊÈ¹ÈÈ»ÊÌ¼ÌÈ¹ÇË¸ÊÈ¸ÇÊ·ÊÌ»ÉÊ¹ÊÉ½ÌË»ÈÈ»ÉÈ¼ÌËºÈÌ»ÈÈ¹ÊÊ½ÊÈ»ÌÉ¼ÈÊ»ÌÍ¾ÊÊ»ÉÌ»ËÎ¿ËÌ»ÊÌ»ËÌ»ËË»ËÌ¼ÊÍ»ÊÌ¼ÌÉ»ËÌ¿ÈÎ»ÉÍÁÊËºÉË»ÆÉ¹ÇÈµÈÌ¸ÈÉ»ÊÊ»ÌÌ¿ÈÌ¾ÌË¿ÈÌ¼ÌÎ¾ÎÌ»ÌÏ¾ÌÌ½ÐÎ¾ÊÍ¼ËË»ÊÎ¾ÊÍºÎÇ¿ÌÌºÎÌ¾ÌÌ½ÌÈ¹ÊÎ·ÆË»ÊË¼ÌÊ¾ÉÌ¹ÉÍ¿ÌÐ½ËÌ½ËÎ¾ÍÒ½ÐÐ¾ÌÊ¿ÍÉÁÊÒ¾ÌÍ¾ÐËºÈÌ¼ÈÊ¼ÍË½ÊÌ¸ÌÈ¼ÌÍ¾ÌÎ¾ÈÍ»ÉË»ÌÎ»ÊÌÁÌÎ¾ÎÊ½ÎÌÀÊÌ¾ÍÌ¹ÈÊ»ÌÊ¹ÉÍ½ÌÊ¾ÊÌ¾ÉÍ¹ÌÎ½ÍÊ¾ËÎ»ÍÎ¼ËÐÁÌÊ¿ËÎ»ÎÌÂÎÏÀÍÐ¼ÍÍ¾ÎÎ¼ÊÍ¿ÌÌ»ÎËºÌÌ¿ÌÎ¿ÌÌ¾ÍÎ¾ÌÍ¾ÌÌ¾ÌÒ¾ÌÏÀÍÎÀÎÎ¾ÌÐÀÍÏ¾ÍÐ½ÏÒ¾ÍÐÁÎË»ÊÎ½ÌÎÀÌÎÀÎÒÀÐÏ¾ÌÏÁÍÓÀÏÏÀÍÐ¿ÐÐÁÐÏ¾ÍÐÀÎÐ¿ÌÐÀÐÎ¿ÌÑ»ÎÍÃÍÐÁÌÐ¾ÎÍÂÎÎÁÍÐ½ËÍÁÍÐÁÎÏÁÐÎ¾ÐÐ¼ÎÍÁÐÐÁÍÐ¾ËÎÁÏÎ½ÐÐ¿ËÎ¼ÍÐ»ËÎ½ÐÍÂËÏ¾ÎÊ¾ÊÎ»ÌÌÀÎÎ¾ÎÌ¼ÎË½ÌÌÀÉË¼ÊÐ¿ÊÌ¿ÊÌ¾ÍÌ¼ÍÌ½ÈÍ¾ÎÍ½ÌÏÀÌÎ»ÊÊ¼ÊÍ¹ÉÐ¿ËË»ÌÊ¾ËÎ½ÎÎ¾ÌÌ¼ÊÎ½ÎÐÀÍÍ½ÍÌ¾ËÎ¼ÌÍ¿ÎÎÁÊÎ¼ÌÎ»ËÍ¿ÉÌ½ÊÌÁËÐÀÍÍ¾ÊÎ¼ÎÒ»ÊÊ»ÌË¾ÌÏºÊË¼ÉÌÀÌÎÀÍÌ¿ÉÉ¼ÊÌ»ÉÌ»ÌÉ¿ÌÊ»ËÈ¼ÉÊ¾ÊË¹ÊÉ½ÊÌ¼ÊÌ½ÊË¼ÈÊ¾ÇÊºÌÊ¾ÉÊ½ÌËºÉÈ»ÊÊ¾ÊÊÀËË»ÇÇ¸ÇÈ»ÉÈ»ÈË¼ÊË»ÉÊ»ÆÇ¹ÈÄ½ÉÆ¹ÆÊ·ÅÈ½ÍÈ»ÆÇ´ÄÇ¹ÆÊ»ÆÇ¶ÅÇ¹ÆÆ»ÆÈ·ÅÆ¸ÇÇºÆË»ÇÈ»ÈÆµÃÆ¸ÆÉ¹ÆÇ¸ÆÇ¶ÈÆµÄÆµÈÄºÆÉ¶ÅÇºÈÉ¸ÆÄ¶ÆÃµÄÃ·ÁÅ·ÆÈºÃÆ·ÇÃ»ÅÅ·ÉÆ·ÈÆ¹ÈÅ¹ÆÇµÆÆ¸ÂÁ·ÃÁ´ÂÆ·ÅÁ¶ÄÄ³ÅÁ¶ÃÁ¶ÅÅ³ÄÁµÃÃ´ÃÂµÂÄ´ÃÅ´ÂÂ´ÂÅ·ÂÃ·ÁÅ·ÆÆ³ÆÁ´ÃÁ´ÅÃ·ÁÁ³ÁÆ¹ÆÄµÃÁ¶ÁÁ°ÁÁ±ÃÅ·ÂÀµÁÀ³ÃÁ´ÀÁ³ÁÁ³Á¿µ¿Ã³ÁÀ´Â¿²Â¿µÂÃµ¿Á²ÁÀ³À¿°¿¿¯¿À³½Á±½¾²½¿³ÁÂ·Á¾³¾À±»À´Á¿³¿Á²¼¾±¾¿±¿¼´¼¾±À½°Á¿´¿¿°¿¾±¾¼±¼¾³¾À´Â»´¿¾²¿¾°ÀÁ´¿¾³½»¯¾½¬Á¾µ¼¼²¾¿²½»³¿¿²À¾±¾¿´º¾³¾¾±»»±¾»±»À³¿½°¼¼³¿»¯¼¾®»½¬¼»±¼»®½¾®»»®½¸®ºº³»»¯»º¯½º¬¹¹­»¶®»½¯º¼­º»«º»­»»¯¹·¬··­¹¶¬¹»®º¹¬¹»©»¸¯»¹«»º®»¹¬»»®»º®¹¶®¹¥°°£³®¡µ¯¡¶±¤´²¡¶°¢´²¢·²£¸°¢´®¡µ±¡·°§¸²¡¶² ¶° »²¡¹® ¶±¡·³¸¯£µ³º¯¡·¯¤¸¯¢»°¡·²£·´¢»³¹³¡½³¡¹°¢º³¥·³ ·°¦º´¤¸³¤¸³¤¸·£¸µ¥¸µ¥¸³ ¸²¥·¶¦¹²¢··¦¹³¤ºµ¥»µ¥»³§»²§º·¤»¸£¼·§»³¦»·¦»³§»¸§¸³¦»¶¦»µ¥»¶£¸¶¦»¶©¼¶¤»·ª»·¥»·¥»µ§½´£»¶£¼·¨½¶§¼µ¦¾·§½¸©»¸©À·¨¾·­¾¸§¾¹¬»·ª¿»¬½·§½¸¨¾»§¾¸¥À»©½º«¾¸«Àºª½ºªÀ¸©¾½ª¾¹ª½»ª½»¬¿º©¼¼©¾»©À»«¾»«¾º¬¾½©Á»©¾»«À¹¬¾¾«Á¼ª¾¼®Ã¹®Á»®¾¼¬Ã»¬Á¼©Á¾­À»¬Ã¾ªÁ¿¬Á¾¬Ã½¯À¼­À¼¬Ã¿¯Ã½­Â¾«Â»¯ÂÀ°Á»ªÆ½®Ä¾¬Â¾®Ä½¬Ç¾­Ã¼«ÁÀ­ÃÀ¬Ã¿¬Æ¿¬Ã¾­Æ¾°Æ¿°Á»¯Ä¿­ÆÁ®Ã¾°À¾¯ÆÂ¬Ä¿®Å¼®Å¾®ÆÁ¬Ä¼®ÆÀ°Ã¾¯ÃÀ°Ä¾°ÇÁ¯ÄÁ¯ÆÁ±ÄÀ®ÅÂ­Ä¿°Æ¾­ÃÁ³Æ¾®Ä¿±ÅÁ°ÆÁ²Æ¼°ÃÂ°ÃÀ°ÄÀµÈÃ­ÄÁ°ÆÃ°Æ¾³ÆÃ´ÄÃ²ÄÃ®ÃÃ²ÇÁ³ÆÃ¬ÄÁ³ÈÀ­ÆÃ²ÆÁ²ÄÀ°ÆÃ°ÆÁ³ÄÁ°ÊÃ³ÆÃ±ÆÁ³ÈÃ²ÇÃ²ÆÃ²ÈÃ°ÇÃ´ÉÃ´ÆÂ³ÊÃ²ÈÁ³ÈÀ°ÆÃ±ÇÆ³ÈÄ²ÅÃ±ÉÁ²ÈÂ®ÈÀ³ÆÄµÈÅ±ÇÃµÈÃ¹ÆÂ³ËÆ²ÉÄµÉÃ³ÈÄ³ÈÄ²ÆÃ®ÈÄ±ÉÆµÇÅ´ÇÄµÈÂ²ÈÃ³ÊÄ´ÈÃ³ÃÅ²ÊÅ±ÈÃ°ÇÄ³ÇÄ²ÅÃµÈÃµÆÄµËÆ³ÈÈµÊÃµÈÈµÉÄ·ÇÃ³ÊÈ¹ÆÂµÉÇµÊÄ·ÇÄ²ÉÇ·ÊÄµËÉ´ÊÅ·ÊÆµËÇ¶ÊÄ¶ÉÈ·ÉÆ·ÈÆµÌÆ¶ÊÊ³ÊÆ·ÉÇºÌÈ¶ÊÇµÊÈ¸ÌÇµÈÊºÉÊ·ÌË¸ËÈ·ÎÉ·ÌÊºÊÈ¸ÉÆ·ÉÅ¸ÈÆ·ÈÆ²ÇÅ·ÊÉ³ÊÇ¶ÇÈµËÃµÉÆ¸ÊÈ·ÎÈ¸ËÇ·ÈÌ¸ÌÉ¸ÊÌ¸ÌÉ·ÍÌ·ÌÈ¸ÌÉ·ÊÇ¸ËÆ·ÌÅ·ÊÈ¶ÊÄ·ÇÉ¶ÊÃ³ÆÄµÆÊºÌÉ¸ËÃµÆÉ·ÈÊ·ÉÈ»ÊÉ¹ÌÌ»ÍÈµÈÄ·ÆÈ·ÈÊ¸ÍÉ¸ÊÈ´ÊÆ³ÊÄ³ÌÊ·ÈÉ·ÊÉ·ÊÄ·ÊÊ·ËÌ¸ÉÈ¹ÌÇ¶ÊÈ·ËÇºÌÎ¹ËÈ·ÍÊ¹ËÈ¸ËÆµÊÇ¶ÌÊ·ËÈ¸ÌÈ¶ÎÊ¶ÌÊ¸ÊÊ¹ÌËºÊÈ¸ËÊ¸ËÈºÊÊ¸ÍÈºËÊºËÌ¼ÎÊ¸ÏÌ¶ÌÈ¹ÈÈ¶ÌÊ·ÌÊ¹ÉÌ¸ËÉºÌÌºÌÇ´ÌÆ¸ÉÌºÌË¸ËË·ÎÈ¹ÎÌ¼ÌËºÐÇ¶ÍË¹ÌÌ»ÎË»ÏÌ»ÎÌ½ÎÌ»ÍÊ¹ÊÎ¸ÎËºÎÎ»ÎÉ¼ÌÈ½ÌÌºÎÌ¹ÌÌ»ÌÊ¼ÎÍ¸ÌË»ÎË»ÐÌ¼ÌÊ·ÌÊ¹ÏÌ¼ÌÍ»ÑË»ÍÎ»ÎÊ¼ÎÌ»ÐÌ·ÊÊ»ÎÊ½ÎÉ»ÌÍ»ÎÌ¾ÎÊ»ÊÊ¹ÎÌ¸ÌÌ¹ÌË·ÊÈºÌÈ¸ÊÈ¸ÍÉºÌÈ·ÐÈ¶ÈÉ·ËÅ¹ËÈ¶ÊÆ»ÊÆºÌÆ¹ÇÈ¸ÌÈ¸ÊÈ»ÍÈºËÇ¹ÊÇ¹ÌÆ·ÊÆ·ËÇ¸ËÇ¼ÊÈ¸ÌÊ¹ËÊ½ÊÈºÊÉ»ÍÊ»ËÉ»ËÍ¹ÊËºÌÊ»ÌÌ·ÊÊºÊÊ·ÊÇ¹ÊÆ·ËÇ¸ÍÈºÊÈºËÊ½ËÊ¸ÌÊ»ÌÈ¸ÊÈºÌÊ·ËÉ·ÈÇ·ËÈ»ËÆ¹ËÈ·ÊÇµÈÌ¸ÈÈ¸ÌÇ·ÊÉ·ÈÈ¶ÊÆ¶ÈÈ·ËÇµÉÆºËÅ³ÇÇ·ÊÇ¸ÈÆ¶ÊÆ¸ÈÇµÈÄµÊÃµÈÇ·ÊÆ¸ÈÈ´ÇÈ·ÉÇµÇÈ·ÊÅµÈÃµÇÇ¶ÆÃ·ÈÅ³ÇÄµÇÄ³ÆÆ·ÌÅ²ÉÆ²ÃÄ³ÇÄ·ÈÆ³ÈÃ²ÆÀ¯ÆÄµÅÆ¸ÇÁ²ÇÃ·ÆÃµÆÅ³ÇÃ³ÄÃ²ÆÃ¶ÆÆ³ÆÁ²Æ¾²ÄÄ´ÄÂ³ÃÃ³ÈÂ³ÄÃ¶ÆÃ±ÇÃ°ÄÂ³ÇÁ³ÆÃ³ÇÁ²ÄÂ³ÆÄ´ÄÂ±ÄÁ²Ã¾²ÆÁ³ÃÀ°Ä¼±Ä¼®ÀÀ±Ç½±Ã¾¬ÁÃ®Å½¬Ã¾®Ã½²Ä¾°ÁÁ±ÅÂ¯ÁÀ°Ã¿¬À½°Á¾±Ä¾®Ä¾³Å½¯Ã¾¯Ä¾°Ã¾°Â¾²Ã¾®ÁÀ±Ã»®Â¾°Á¿°¿½®Â½«Á»¯Â½¬Â¿¯Á¼¬¿¿¯Ã¾¬Á¾¬Á¼¬À¾¬Â¼¬Á»®À»®¿¾­Á¹ª¿½°¾¾¬¿»²Àº¬¿»ª¿¼¬À½®¾·¬¿¼­½º¬¾À«¿¸¬½½«À»®½½«À½¬¿¸¬¾º®¾»®½»«½¸­¿¸«¾¼«½º¬Áº©¾»­½»«À»¬¿»«½»¬¾»¬¿¸©¼»­½¸¬½¸¬¾·«¾¸°¾¶«¾¸©½º©½¸ª»·«»½¬º¸ªºº¨»¸¬½¸©»µ©»·¦»¹©»·©»·¦¹´§¼¶¥··©»¸¬»³¨»µ©»¸ª¾µ©»µ¦¹µ©¸µ§»·©·µ§»¶¦¸¶¦»¶©¹²¥¼³£·²¢»¬¤®´ª¶´¨··¦··ª»·©º·§¹¸§µ·¦¸¶¨¸·¦¹µª·¸©µ¹¨»·§¹¶§¸¹¨º¶ª··©¸·¤ºµ¨·¶ª¹¸¦··¬»µ¦»¶§·¶«¹·§·³¦··¨¹·¨º³ª¹»¥¹¼¨»µ­¹·¬»º¦¼·¨¸º¨¹»¬¾¸¬¼»©»¹§»¸ª¾¶©º»­¾·­½º¬¼¸«»·¬½º«»»¬¼º«½½¬½»¯½º©¾º¬¾»­»»¯½ºª¼»©»½°¼½«Á¼¬½»©¼»­½½«¾¸¬»½¬Á¼¬»»¬»º¬¾»®¾¿¬¿¼²À¾ª¾½¬Â¼³¿»°¿º°ÀÀ®¿¾­ÀÀ±Â»¯Á½±ÁÂ°Á¾°ÃÁ³¾½²½¾³Á¿®À¿¯¿»®¿¾±Á»°Á¾®¾¾±Ã¿¯Á¾®À»°À¾°ÀÀ³ÁÀ°ÃÁ²Ã¿¯Á¿±ÄÀ³Á¿¯Á¾²ÃÀ±ÂÂ­ÁÂ³Á½°Ã¿³ÀÁ¯ÃÀ¯Â¿²ÂÁ°ÃÂ³ÅÁ±ÆÁµÃÁ³ÄÀ­ÆÂ²Ã¾³ÆÁ³ÅÄ´ÅÀ³ÅÁ±ÂÁ´ÃÁ°ÈÄ°ÄÃ¶ÄÂµÆÀ³ÄÃ±ÅÄ³Æ¿³ÄÅ´ÅÃ³ÃÃ²ÆÆµÆÂ³ÇÃ¶ÃÂ³ÆÇµÆÄ¹ÇÃ³ÊÆ³ÃÄ·ÈÃ·ÅÄ³ÅÁ¯ÄÃ±ÇÇ´ÅÂµÆÆ·ÆÆ¸ÊÂ´ÇÃµÆÃµÈÅ·ÇÇ¹ÈÅ´ÈÃ´ÈÂ¶ÇÅ³ÆÀ´ÇÃ¶ÇÃ´ÈÇµÇÃ·ÅÄ»ÇÆ·ÈÇ¹ÊÃ¶ÆÅµÆÉ¹ÅÆ¸ÈÈ¶ÊÂºÉÇºÈÈ´ÆÃµÆÆ³ÊÊ·ÆÆµÈÊ·ÈÈµÇÅ»ÊÃ·ÈÅ¶ÆÅ¶ÇÇ¶ÊÆ¸ÈÆ¶ÈÈ·ÈÈ´ËÊ¹ÊÆ·ËÆ¶ÉÈ·ÊÈºÈÈ¹ËÆµÊÇºÊÆ·ÈÇµÈÆ·ÇÉºÉÈµÌÈ¸ÉÆ¸ÈË¹ÈÊºÉÆºÌÈ¸ÊÈ¼ËÊ·ÉÇ·ÊÈºËÆ·ÈÈ·ÌÈ¹ÇÈ¸ÊÉµÌÇ¸ÊÇ»ÊÆµÊÊ»ÊÊ³ÊÉ¹ÉË¸ËÊ»ÊÊ¹ÊÈºÊÊ¹ÊÊ»ËÈ¹ÌÌºÌÊ½ËË¼ÈÉ¿ÊÉ·ÌÍ¼ËÊºÊÊ¾ÌÌºÊÈ·ÊÊ·ÌÉ¸ÎÍ»ÌÊºÌËºÊÎ·ÎÊºËÌ»ÎÌ½ËÎ»ÎÌ»ÌË»ÌÌÀÎÏ½ÍÌºÉÌ¾ÍÍ¾ÏÎ½ÐÍ¾ÎÌ¿ÍÎ½ÐÌ½ÐÏ¼ÎË½ÌÎ½ÌÎ¿ÌÉ¹ËÈ¶ÉÆ·ÊÊ»ÊÉ·ËÍ¿ËÎ»ÎÏ»ÏÊºÊÌºÍÍ¼ÊÍºÌÌ¾ÌÊ¿ÌÌ¿ÍË¼ÎÎ¾ËÌ¼ÏÎ¼ÌÎ½ÐÐ¾ÐÎ»ÎÊ»ÌÈºÊÉºÌË¹ÉÉ¸ÈÈ½ÊÍ¼ÌËºÈÎ¼ÉÌ½ÊÐ»ÌÊ¼ËÍ¾ÌÐ¿ÎÈ»ÊÈºÌÌ¼ÌÐ¾ÈÌ»ÐÌ»ËÊ»ÉÊ½ËË»ÌÍ»ÌÊÁÎÎ¿ÍÑ¾ÍÎ¼ÐÍ¿ÌÎ¾ÎÊ¼ÌÐ½ÒÒ¾ÎÎÁÐÌ¾ÎÐ¹ÊÇ»ÌÎ¾ÌÎ¼ÍÊÁÐÐ¾ÍÊ¾ÎÎ¾ÌÌ½ÎÎ»ÍÎÁÑË¿ÐÌ¾ÎÎ¾ÏÐ¿ÐÎ¾ÌÐ»ÎÌÀÌË½ÎÐ¼ÎÍ½ÌÎ¾ÐÐÂÐÌ¾ÎË»ÐÊ½ÍÈºÎÐ»ÌÐºÑÑÀÓÑ»ÔÑ¾ÑÏÁÐÍÁÐÐ»ÎÎÀÌÑÁÐÒ¾ÍÒÀÎÐÀÐÌ¾ÎÎ¿ÏÓÁÐÒ¾ÐÑÁÑÓÃÑÐ¾ÎÐÀÐÐ½ÍÒ¿ÐÏ¿ÑÒÃÎÌ¿ÐÒ¿ÍÏÀÐÒÁÐÑ¾ÊÍÀÒÐ¿ÎÎÁÍÌÁÍÐ¼ÍÐ¿ÐÍ¾ÐÐ¾ÎÍÀÑÎÁÑÏ¾ÒÌ¾ÌÐ¾ÎÎÀÌÌ¾ÍÊ½ÍÌÀÌÊ¼ÊÊ¾ÐÆ»ÌÉºÐÊ»ÌÆ¼ÎÈ¼ÊÍ¹ËÏ¼ÌÊ¸ÊÊ¹ÌÍ»ÌÌ½ÌÉ¼ÊÌºËÊ»ÌÎºÌÊ¹ÊÈ½ÈÌ»ÌÈ½ÌÉ¾ÍÈ½ÎËÀÌÈ½ÎÆ¼ÍÇ¾ÌËÀÍÈ¾ÌÊ½ÎÊ¾ÐÍÁÐÌ¾ÌÈ½ÎË¿ÌÌ½ÍÏ¾ÏÌÁÌÌºÌË¾ÌÌ½ÏË¾ËÎ½ÌÌ¾ÊÊ»ÌÌ¼ÎÎ»ÍÌ¼ÎÌ¾ÌÌ»ÌÌ»ÌÌ»ÊÌ¾ÊÈ¾ÌÊ¹ÊÎ¿ÌÌ¼ÍË½ÍÍ»ÊÆ¼ÌÌ»ËÊºËÊ»ÌÌ¾ÍË½ËÌ»ÌÍ»ÌÊ¹ÊË¾ÎÌ¼ÊÌ»ÌÊ¾ÎÈ½ÈÊ»ÉÈ·ÈÌ¾ÊÈºÊÈ»ÍÇ»ÊÊ»ÈÈ¸ÇË¼ÍÈ»ÉÌ¸ÌÉ»ËÆ¼ÈÆ·ÇÉ·ÊÈ¹ÆÇºÈÈºÈÅ·ÇÊ½ÈÇ»ÉÆ¸ÊÈ·ÈÊ»ËÅ´ÊÆ¶ÅÆºÇÈ¹ÈÆ·ÆÄ·ÇÅºÇÆ·ÆÆ¶ÊÉ¶ÊÇ¸ÇÈºÅÄµÆÇ¶ÈÇ¸ÅÃ·ÊÆ¹ÈÆ¹ÆÇ»ÄÇ·ÆÃ¸ÈÅ³ÈÅ´ÇÃ·ÆÃ¶ÃÃ·ÅÅ·ÅÆ¸ÅÂ³ÁÂ²ÂÀ·ÃÂ·ÃÃ¶ÄÁ´ÇÆ·ÆÃ·ÃÃ¸ÆÃ·ÅÅ³ÃÄºÃÁ¶ÃÃ´ÃÆ³ÄÅ·ÃÄ³ÄÁ¶ÃÆ´ÅÁ³ÆÁ³ÆÄ²ÁÀ¶ÂÂ°ÄÁµÀ¿³ÁÁ³ÁÂ²¾¾³ÃÀ´ÂÂ²Á½µÀÂ´À¿³ÂÂ³ÅÃ³ÁÀµÁ¼·ÀÁµÂ¾²Á¿³ÁÁ°ÀÀ³¾¿³ÁÀ®ÁÀ²ÀÂ±ÂÁ´ÁÀ³¾¿³Á¿²ÂÂµÁ¿°¾¾³ÃÀ°ÀÁ·Ã¾µÀÀ°¾Á³ÁÁ³¾¾¬¾¾²À¾µÀÀ°Á¿³ÁÀ³½¾¯¿¾²À¾±Á¾²¾À°¿½²¾»¯À½°¾¼±¾½°À»°¾Á°»¿¯À½°¾»®¿¹¯¾¼®¼¼³¼º¬»½±½»°»¹­¼¼¯º¹®½¹¯¼»­¼»¬º»°»¼¬»»±½º¬¼¹­¾º¬»¼°»·©¼½¬»¸±¾»­¼¹®·¼¬¹¹¬º·¬º¹®¼©¯«·¬µ°£¸±¡¶±¡¶°¡·³ º¯£·°¦·³·±£·²¡·°¤¸°¡·´£·´¡¸±¡¸°£·¯£·³¥·­ ·³ ³±£¶³¢·³¢¸¬µ²¢¸°·²¡´³¸²§¸±¡¹´§»°¢¸¯¦º·¤¶°£º±¤¸·¤½³¢¸´£·µ£·³£»¶©º·¡º²§·´¥ºµ¤¸³©¼µ¥¼·¤¸µ§¹¶¤º´¤¹¶£½¶¥¹³§»µ¡¹µ¦»³¥¾·¨··¥¼´¥»·¥º·¥½µ¦¹µ¦¼²«¾¸¥¾¸¥»·¨¼µ©½¶¨¼·¨¾º§¾¸©¿·¨¾»§¾»§½¸ª¿¸¦À¹§¿¸¨¾·¨Á»ª¾·«Á·«¿»©¿¸¬Á¸¨¿¸©»·§Áµ¬Á¸«À»ªÁ»ª½º«¾º§¿¼©¿¹¬Â»«¾»§¾»«Á»¨¾¼«¿¼¬Âº«Â»®Á¸«Á¼©Â½­À»«Ã»©À½¬¿½¬Â¾¬¾»­Ã½©À¾¬Ã¾®Ã»­Á½­Ä¾­Á»®Ã¼°Á½«Á¿®Ã¾ªÃ¼­Á»­Á¿®Ä¿®Æ¿®Á¾®Á¾¯Æ½­Ã»¬Á¾±Æ¾³Ä¾°Â¾¬Á¾¬Ä¾«Ã¾°ÅÁ®Ä¾®ÅÁ²ÅÁ­Ã½°ÄÁ°ÇÁ­ÆÁ±ÇÁ®Ä¿²Æ¿¯ÆÃ²ÅÀ±Ç¾®Å¾²ÄÂ±ÅÁ¯Å¿°ÃÀ¬ÇÃ°Ä¾²Ã¾²ÇÁ®ÆÂ¯Æ¿°Ä¿¬ÇÃ±ÇÀ³ÆÃ­ÅÁ³ÈÁ°ÇÃ±ÇÃ²ÈÃ°ÆÃ²ÇÀ´ÇÃ°ÆÁ²ÈÁ²ÆÂ°ÅÂ´ÆÁ°ÆÃ´ÆÃ²ÈÂ´ÈÁ²ÇÃ°ÆÁ¯ÈÁ±ÆÁ°ÆÆ°ÆÃ³ÇÃ³ÈÂ°ÈÁµÈÄ³ÈÃ®ÈÃ²ÅÃ°ÉÃ³ÃÁ²ÆÁ¯ÆÂ²ÈÂ²ÈÃµÇÂ³ÈÄ²ÈÂ²ÇÁ³ÇÃ³ÇÁ°ËÆ³ÊÀ±ÈÃ³ÆÆ²ÈÇ°ÈÁ´ÊÄ³ÈÅ³ÉÃ¶ÉÁ³ÉÅ²ÈÃ±ÈÃ²ÊÃ²ÊÃ¯ÅÃ³ÊÃ±ÊÅ¶ÈÃ·ÇÆµÇÄ³ËÆ·ÉÇ³ÈÈµÈÅ¸ÊÆ·ÉÆµÇÅ·ÈÄ¶ÈÆµÉÆ¶ÈÆ·ÌÉµÉÇµÍÅ·ÌÇ²ÇÈ³ÊÂ·ÊÈ³ÊÆ·ÌÆºÌÈ·ÌÈ³ÈÆ·ÈÇµÌÆ¶ÈÈ·ÎÆ¶ÌÇ·ÊÈ¶ÍÄ·ËÇ·ËÆ»ÊÆ´ÍÉ·ÌÊµÌÆ¶ÊÇ·ÌÉ¶ÎÊµÊÉ´ÉÆ±ÊÄ³ÈÁ²ÄÂµÊÅ¹ÈÈ·ÈÇ·ÆÆ²ÈÆ²ÈÆµÇÆ´ÈÇ·ÇÃµÉÅ³ÈÆ·ËÇ·ÊÇ¸ÌÇ¸ÊÊ¸ÊÈ¸ÌÄµÇÄ³ÊÂ³ÆÂ³ÈÃ³ÇÂ²ÈÈ±ÈÆ´ÅÇ³ÇÅ·ÆÈ¶ÊÊµÇÈµÆÄ¶ÄÇµÇÆ·ÈÉ·ÈÆµÉÆ¶ÎÈ¹ÊÅ´ÊÅ³ÇÄµÈÆµËÈ¼ËÃ¹ÍÉ»ÌÌ·ËÈ´ÊÉºÊÇ·ÌÊ¸ÌÊ¹ÎÈ·ÏÊ·ÍÈ´ÌÃ·ÊÄ·ÊÈ·ÉÊ¸ÊÆ·ÌÌ¹ÌÌ»ÍÊ·ÌÇ¸ÌÊ¸ËÌ»ÐË»ÎÊ¸ËÊ¹ËÊ»ÎÊ¹ÌÊµËÉºÍË»ÍÊ»ÎÊ»ËÊµÌÈ¼ÌÉ·ËÆ·ÊÈ·ÌÌ·ÒÌºÌÉ·ÏÊ»ËÍºÊÌºÎË¸ËÈ½ÌÊµÊÌ»ÌÌºÎÉºÌË¼ÎÊ»ÐË·ËÊºÎÌ¾ÏÌ»ÍÎ»ÒÍ¼ÍÌ»ÌÊºÌÊ»ÐÉ¹ÎÌ»ÎÌ»ÍÉ¸ÌÇºÌÆ»ÌË»ÌÇµÌÄ¹ÊÌ¸ÍÇ·ÍÆ·ËÅ·ÌÆ¸ÊÄ·ÌÃ¶ÌÆ³ÌÄµÎÆ·ËÈ³ÌÇ·ËÊ·ÌÉµÅÊ´ÈÇ´ÊÈ¶ÈÈ´ÉÅ³ÈÊµÊÌµÊÆ¶ÊË³ÎÊ·ÌÌºÎÉ´ÌËµËÊµÈÈ´ÊÊ´ËË¶ÌÈ¶ÌÊµÌÇ´ÈÉ²ÊÈ±ÊÈ±ÈÊ¸ÅÈ²ÉÈ·ÈÌ·ÈÉ·ÈÆ·ÊÈ·ÉÈ¸ÊÈºÊÄ¸ÌÆ·ÊÅ¸ÈÉ·ÊÇ´ÊÉ·ËË»ËÊ·ÎÇ¹ÊÊ¹ÊË»ÊÆ·ËÈ·ÊÈ¸ÍÇ·ÌÈºÌÊ·ËÆ·ÊÉ¹ÊÆ¸ËÇ·ÊÆ·ÌÈ¹ÌÅµÊÄµÆÇ¹ÊÆ·ÈÇ³ÉÆ´ÉÄµÊÈ³ÊÆµÌÈ¸ÌÇ·ÊÅ·ÊÇ·ÈÂµÈÆ·ÈÅ·ÈÈ¶ÇÄºÉÅµÊÅµÈÆ´ÊÆ³ÈÇµÇÆ·ÈÃ³ÆÅ·ÇÇµÇÃ¸ÆÈµÆÆ³ÇÇ·ÇÃ³ÊÃ³ÈÅ²ÆÁ³ÈÃµÈÆ´ÆÃ³ÆÆµÈÃµÇÃ±ÇÆ±ÇÁ³ÇÂ²ÇÁ²ÆÃ³ÄÁ²ÆÄ³ÈÃ³ÃÃ²ÆÁ°ÆÄµÅÁ³ÃÁ³ÇÃ°ÅÁ³ÆÃ±ÄÀ²ÆÀ³ÃÃ³ÆÂ®ÃÀ²Ç¿®ÆÃ±ÆÁ°ÃÁ°ÃÁ°ÃÁ±Ã¿¯ÃÀ¬Ä¿²ÁÀ¯Ã¿­ÃÁ«Ä¼¯Á¾°Ã»³Ã½®Á¼²ÃÂ®ÂÂ¯ÅÀ®¿¾³ÄÀ®ÃÁ²ÃÁ°Ä¿¯Ã¾°ÅÀ®Â¼°Ä¾¬ÁÁ­À¾¬Á»«Á¹¬À¼ªÁ¾°Ã»®À»¬¾¾¬Á¾­À½¯¾»¬¾¾¯Á¾°À¼§¿½¯¿¿¯À¾¬À»­½»©Á·¬¾¼ª¿»¬Á»®¾»¬Á·«¾¹¬½¹¬¾¸¬À¸®¾¸­¿»©¾»¬Ã»¬Á»­¾¸¬¾½¬¿»®½½±Áº¬¼»­¾»«¾»«¿º©¾¸¬¾·¨º¸©½¹«»º«¾¶¬¾·©»»«¾»ª½¹¨¿¸¯¿º¬½¸¬¾¶¬½¸­¾µ©¼¸«¼·¬º¶©»»§º¶ª»·ª¾·«º¶¨»¸«½µ«»·¨½´¨º¸¦½¸©»µ«»·§¹µ¦¸³©»¶ª¹³ª»µ¨¼²¤·µ¥¸³¨¸·¨¼³¦»¸¦»³¥ºµ©·¯¤¯³¨··¥µ´¦·¸©º³©·´¨»·§»º«»´ª¶µ©º´¥µ¶¬ººª»·«¸¶«º¹©ºµ¥¹·¨¹¶§¹µ¨··¨¹·ª¼¶¥»³©¼¹¦¼·¨¹µ¦º´©º·¨·¹§ºµ¨º·¥¹¹©º¶ªºµ©»·©»¸¬¾¹§¼·¨º½ª¾¹¬¼¶¬º·ª¼¹«»º¦»º«»¹«À¼©½ºªº¾ªºµ«»º¬¿º­¼½¬¾º¬¾º®»¼¬¸º©¾ºª¼¾­¾½ª»»ª¿¹©¼½ª¼º¬Â»­½»©½»¬»½­Á¼­½¹®¾»ª¼¼®¿½¬¿»­Á¼¯¾¼¯Ã¾­¾½¯¿½®¿»¯ÂÁ³Á¼±½»°¾À®Á¾¯Â¾±Á½­Á¾®Á¿¯Ä¾¬¿½¯ÁÀ±À¼­¿¾®Â»¬ÂÁ¯Á¿¬ÁÁ±Â¿¯ÂÀ®ÂÀ´Ä¿³Â¼®ÁÁ±ÀÀ´ÂÀ²ÄÁ²Â½±ÂÁ³ÃÁ®ÃÀ²ÄÂ³ÃÁ²Å½¯ÃÀ±ÁÁ¯ÂÄ³Å¾³ÁÁ³Ã¿±Ã¾·ÆÁ±ÃÀµÅÂ°Æ¿³ÁÂ³ÅÁ®ÆÂµÇÁµÄÃ±ÃÅ³ÈÃ´ÃÅ´ÃÁ°ÇÃ°ÃÃ´ÆÄ³ÇÅ¶ÆÁ´ÆÂ°ÆÅ´ÅÂ±ÆÅ±ÈÃ³ÆÆµÊÁµÈÂ°ÄÃ³ÆÃµÈÀ²ÆÁ¶ÆÃ´ÆÆ³ÆÃµÇÂ·ÈÅ·ÇÃ¶ÊÆ³ÈÄ´ÅÆ³ÆÆ·ÈÀ±ÈÃµÆÃµÈÄµÉÃµÉÅµÇÂ¶ÇÃ³ÇÄ·ÉÄ³ÇÅ·ÈÇ·ËÅµÈÈ¶ÇÆ¶ÊÈºÊÇ¶ÇÃ¸ÊÆµÇÅ·ÉÃ´ÇÆ´ÈÈ¸ÊÇ·ÊÆ¹ÈÇ´ÊÇ¹ÌÆ¸ÊÇ·ÇÅ·ÈÅºÈÈ¸ÈÇ³ÊÈ·ÈÅ³ÊÇ·ÌÇ·ÇÊ¸ÊÈ·ÌÈ»ËÈ¹ÉÆµÊÇ¹ÊÆ¹ÌÈ³ÊÆ·ÌÈ¹ÉÊ¶ÊÊºÊÅµÊÇ¹ËÈ¸ÈÈ¸ÊÊºÊÈµÉÉ·ÊÈ»ÌÈ·ÈÇ¹ÌÈ¶ÊÅµÈÈ¸ÊÈ¶ÌÌ·ËÊ·ÉÊ¹ÌÈ´ÊÆºÊÇ·ÌÊºÊÈ¶ÌË»ÎÊ»ËË¹ËÊ½ÌÌ»ÊÊ¹ÎË¹ÌÊ¼ÌËºÌÊ¾ÍÈ¸ÉÊ¹ÌÈ¼ÍÊ¹ÌÉ¼ÉÌ½ÎÊÀÎÍ»ÊÊºÌÍ¾ÎÌ½ÎÊ¸ËÍ»ÎÍ¾ÐÌ½ÍËºÌÌ½ÌÎ¿ÌÌ¾ÏÈ¹ÍÊ¼ÏÏ¾ÎÉ¾ÎÏºÌÊ»ËÌ¾ÌÐ½ÐÊ·ÏÊ»ÎÌ¼ËÍ¾ÍË¼ÎÌ»ÎË¼ÌÍ»ÍÉ³ÊÆ¶ÊÂºÈÈ¸ËÊ¾ÊÆºÈÊ·ÊÇ¹ÈÉ»ÌÈºÊÊ¸ÊË»ÌÌ¹ÉÌºÌÍ»ÎÍ»ÍÍ¼ÎÐ»ÎÍºËÌ»ÊÈ³ÈÆ¼ÈÁ¸ÅÆ·ÆÇºÈÈ»ÇÍºÉÌ»ÊÊ¸ÇÈ·ÈÉ¹ÈÊ»ÊÊ¹ÇÉ¶ÈÈ¼ÊÎ½ÌÊ¼ËË¿ÌÏ¹ÎÈ¹ÊÆ¶ÈÊ·ÊË½ÎÌ¾ËÎ¾ÌË½ÏÍ¾ÐÎ¼ÎËÀÍÎ½ÎÐ¼ÍË¿ÎÌ¾ÍÌ½ÌÊ½ÍÊºÊÊ¼ÍÎ¼ÎÌ¿ÐÏÀÎÐ¼ÐÎ¼ÏÎÀÐÔ¾ÎÌ¾ÐÍ¾ËÎ¾ÌÍÁÑÍ¿ÌÒ¿ÎÎ¾ÎÎÁÐÊ¾ÌÌ¾ÐÐ¿ÍÐ¼ÌË¾ÎÊ·ÊÌ»ÎÐ¾ÌÎ¾ÑÌ¿ÍÑ¿ÐÒ¿ÐÎ¾ÐÌÁÒÍÃÎÎÀÎÓ½ÓÐÀÎÏÃÐÔ¾ÎÍÁÐÏÁÐÑ»ÌÐÁÎÎÁÎÏ¾ÑÐÀÐÏÂÎÐÁÍÍÀÏÒÁÐÌ¿ÐÌ¾ÍÍ¿ÑÌ¼ÌË»ÊÍ¹ÌËºÊÎ¾ÍÌ»ÊÎ¼ÌÍ¾ÊÏ½ÌÏ½ÐÍ»ÌÑ»ÎË¹ÎÎ»ÎÐºÐÌ½ÐÎºÏÎÂÍÎ¼ÐÏ¼ÌÏ¿ÎÏÁÏÎÀÍÏ¿ÎÎ¼ÎÌ¿ÍÌ¾ÐÌ½ÍÎ½ÐÐÂÐÐ¾ÐÍ½ÐÏÀÐÎÀÐÏÁÍÏ¾ÎÍ¾ÐÌÁÎÌ¾ÌÌ¾ÍÐ¿ÍÎ¿ÌÎ¼ÍÌ¿ÌË»ÌÍ½ÎÎ»ÎÌºÎÏ»ÍÌ»ÍÍ¸ÊÎ»ÌÊºÊË»ÊÌ¼ÌÊ¼ÎÌ¾ÍÊ½ÐÌ¾ÎÌÁÎÍÀÎÏ¾ÌË½ÍÌ¼ÎÎÁËÌ¿ÏÎ¼ËÌ¿ÌÐ¾ÎÌ¿ÌÌÀÎÊ½ÎÈ¼ËË¾ÍÊ»ÎË»ÈÊ»ËÊ½ÌÌºÊË»ÊÊ¾ÎË»ËÌºÍÌ½ÌÌ»ÊËºÌÊÁÍË»ÊË½ÌÌ¼ÌÇ½ÌÊ»ËÊ¼ÊÈºÌÊ¾ÉÈ¹ÍË»ÊÊ¾ÉÈ¹ÉÉ¼ÊÄÀÌË¹ÊÈ»ÇÉ¹ÉÆ¼ÍÄºÉÈ·ÉÈºÈÈ»ÊÈ»ÊÊ¼ÊÅ¸ÊÈ»ÈÈºÉÊ·ÈÈ·ÆÉºÈÉ»ÊÇ·ÈÆ´ÈÇ·ÊÆ·ÉÃ¸ÇÇ·ÈÅ·ÈÅ¸ÇÆ¶ÅÄ·ÈÄ»ÈÈ·ÈÆ»ÇÆ¶ÅÄµÆÄºÈÆ·ÇÆ´ÇÅ·ÇÃµÈÂ·ÅÃ¶ÈÃ¶ÈÆ³ÆÃ·ÇÃ³ÇÄµÆÂµÆÃ´È½±ÅÃ²ÈÆµÆÅ¶ÄÂµÇÀ·ÆÁ·ÇÁ°ÃÅ·ÆÅ·ÃÄ¶ÄÂ³ÅÂ´ÃÁµÆÄ¶ÆÃµÆÂ³ÄÆ´ÃÀ³ÄÁ³Á¿¶ÃÀ³ÆÀ°ÃÀ³ÃÁ¶ÁÄ±Ã¿²Ã¿³Ã¿±ÄÁ´ÃÅ°ÁÁ±Â½³ÁÁ±Ã¿´ÁÂ³¿¾°Á»³ÁÃ³¿À°ÁÁ°Á¿²¿Á´ÃÀ²¿¾°Ã¾²Â¾²Ä»­¿¾´¾Á±Â¾¯ÂÁ±À½³ÁÁ¶Á¿´ÂÀ¯¾¿³ÁÁ³ÁÀ³Á¼µÁ¼®À¾³ÂÀ²¿»±¿¼¯À½²ÁÁ°Á¿²¿¼°¾½´Á½²Ã¼¯¾À­¿¼³À»²À¼±¾¹­½¾¯¿»­¿»²¾º¬¾¾²¾¿­¾»®¼º²¾¹±¾»±½½¬¾»­»º­¾¸°»·¬¹»®½º³¾º©½º®»º¬¼º¯»»®»¹ª»»ª»¹®»¹°»»­»¸­»º®¿·®¼¹¬½¨³°£·¯´°¡·¯·¯´°£µ²¥¸²£¸²´²¢¶²·±¥¶²¡·±¸®¢·µ¡·¯£µ²£¸²£º±¸±£·³£¹µ¥¸±¤·²¢º° µ³¶µ¥¸²µ³¥¸³¥¸³¥º² ·³£¹²¦º±¡º²¢·´¡¹µ¥¸·¥¼²¥»³·µ£º³¦»³©»µ§ºµ¥º´§¸¶¡¸²¤½´¥»¶£»³¥¹±¤º¶¤»²¥½µ¤¹·£ºµ§»³¥¾³§ºµ¤¾µ©»¸©¹·¢¹·¥¾¶¦»¶¤½¶¥»·©¾»©½·§»¶¦»¶§»¸¨À·§Áº§¾´§¾¸ª¾º¦½·¨»·¬¿¸«À¸¬½¹¬¿º©¾»¨¾¹¬À»©¾¸¨¿¹©¾·¬Á¸¬¾º«¿·ªÁ·§¾¹©¾»«¾º«¾½¬¾»¬Á¼©Á¸©¿»©Á»ª¾»¬À·¬Á½¬Á»«¿º«Â»«Á»­Ã½­À¼¨À»­Áº¬Á»¬Á»®Á½¬Ã»¬Ã»­Â»¯Á¾¬Á¼®ÃÀªÁ¼¬Á¾®ÄÁ®À¾«Á¾¬ÃÀ­ÃÁ¬Æ¾²Á»­Ã¾¬Å¾¬ÃÀ¯Å½®ÃÀ®Ä¿²Á½­ÆÁ«Ä¾¯ÃÁ¯ÇÁ¬Ä¾¯Á¾±Ã¾®Å¾­Å¾±ÅÁ±Æ¾­ÁÃ°ÅÀ²Å¿³Ä¿°Ã¾°ÆÀ®Ã¿­Ä¿°Æ¼®Ã»²Æ¿¯ÃÁ±ÄÁ­Ã½®Å¾²ÃÁ²ÅÁ°Ç¿¯ÆÁ±ÆÁ³ÆÀ°Å¿«ÆÁµÇÃ´ÈÁ¯ÆÁ±ËÂ³ÉÄ°ÇÄ±È¾±ÇÆ°ÈÁ³ÇÁ³ÇÁ±ÃÅ°ÉÁ³ÇÂ±ÈÀ²ÈÃ°ÄÃ²ÉÃ±ÆÁ±ÅÃ±ÅÁ³ÇÀ­ÈÁ±ÈÄ°Æ¾³ÈÂ°ÆÄ³ÊÅ¶ÈÃ³ÇÃµÇÃ°ÇÆ²ÇÃ²ÇÃ³ÈÂ²ÇÄ´ÈÄµÆÃ³ÇÁ²ÆÄ²ÊÂ´ÈÁ´ÆÃ³ÈÃµÆÄ³ÈÃ²ÆÃ²ÉÂµÇÆµÉÄ·ÇÄ³ÇÂ±ÇÆµÇÅµÊÄ³ÉÇ´ËÆ³ÉÆ´ÉÇµÊÃ·ÌÉ·ÈÆ²ÊÄµÊÇ·ÏÆ·ÉÆ¶ÈÆµÉÃ·ÌÇ´ÉÄ·ÊÇ³ÊÇ¸ÌÇ·ÉÆ´ÉÇ¶ÊÈ¹ÎÇµÍÉ·ÊÅ·ÊÆµÉÊ¹ËÄ¶ÌÆ²ËÈ·ÌÇ·ÉÈµÉÉ¸ËÇ·ÉÊ³ÌÉµÊÇ³ÊÆ·ÊÈ·ÌÈ¶ÌÈ¹ÎÈµÍÇ¸ÊÊ´ÊÈ·ÊÊ¹ËÆ·ÍÈ·ÊÈ¹ËÇ·ÈÈ®ÉÁ­È½±Ä¾°ÄÄ¶ÈÆ´ÉÃ±ÈÃ³ÇÇ¶ÈÇ´ÊÄµÌÆ¸ÉÆ»ÊÊ·ÊÆ»ÎÄ¶ÇÈ¸ÈÈ¸ÅÈ¶ÉÉ·ÆÃ³ÆÅ±ÃÁ±ÃÆ²ÅÁ±Á¾²¿Ä±ÅÅµÃÇ³ÃÃ²ÁÁµÄÂµÁÄ³ÅÄ³ÅÅ·ÊÈ·ÉÆ·ÈÈµÌÈ³Ê¿´ÆÁ³ÆÆºÈÆ·ÊÈ¸ÊÇ·ÌÆ»ÐÊ·ËÇ¸ÌÈ¼ÊÉ·ÎÈ¹ÍÉºÈÎ¸ÊÊ·ÌÅ¶ÈÉ¶ÊÈ·ÊÈ¸ÊÊ·ÌÊ¸ÏÊ»ËÈ»ÏÊ¹ËÌºÏÌ½ÌËºÎÈ¹ÌÈ¸ÌÌºÌÆ¶ÊÇ·ÍË·ÎÉºËÈ¹ÊÈ¶ÊÊ·ÉÇ·ËÉ·ÊÉ·ÊÊ»ÌË»ËÎ¼ÌÉ»ÉÊ»ÎÆ·ÊÊ¹ÌÊ¼ÎÊ»ÌÌ¿ÏÊºÎË¹ÍÌ»ÎÊ¼ÌÉ·ÌÉ¹ËÌÀÏÈ¹ÌÊ¸ÉÇ¹ËÄ·ÈÆ¸ÉÉ¶ÍÈ¹ÊÆºËÉ¶ÈÉµÎÊ³ÌË¸ÍÈ·ÌÈ¸ÊÈ¸ËËºÌÈºËË»ËÊ»ÎÊºÊÊ»ÊÌ¸ÏÊ»ÊË»ÌÊ»ÌÊºÌË¼ÊÊ½ÎÊ¼ÎÊºÎÊ»ËË¸ÌË»ÎÊ·ÌÉºÌÌ¹ÌÊ·ÌÌ¸ÌË·ÎÌ½ÊÈ·ÊÊºÉÊºÌÌ¶ÎÊ·ÊË¸ÊÉ»ÌÉ»ÌË¸ÍÊ·ÊÈ¸ÌÇ¸ÌÈ¸ÍÉ¼ÌÊºÌÊ»ÌÈºËÈ¹ÌÊ¹ÊÈ¸ËÊºÊÇ¹ÍÈ·ÈÇµÊÈ¸ÇÇ¸ÊÈºÊÊ»ËÊºÊÆ¸ÎÉ¹ËÈ¸ÌÆ·ÊÊ·ÈÊºÌÈºÍÈºÊÇ¸ËÆµËÊºÊÆ¸ËÆ´ÊÆ·ÈÆ·ÊÆ·ÇÉºËÇ¹ÊÈµÉÆµËÇµÈÆ·ÉÆ·ÊÆ¸ÈÆ·ÇÄ´ÉÈ·ÌÅ¹ÍÅ¸ÊÈ·ÇÈ·ÈÆ·ÈÆ²ÈÅ³ËÄ·ÈÇ·ÉÆ´ÇÆµÉÆµÈÃ³ÈÁ³ÆÆµÆÃ³ÆÄ¶ÆÄ¶ÇÅ³ÈÂ·ÈÁ³ÈÅµÇÁ´ÇÆ¶ÈÂµÉÃ³ÈÂ³ÃÇ·ÆÂµÈÃ·ÆÁ³ÆÄ´ÇÄ²ÉÁ³ÆÃ³ÅÃ³ÉÁ³ÃÁ²ÆÂ³ÇÃ²ÃÃ³ÇÃ³ÇÄ³ÆÃ´ÆÁ²ÅÁ²ÃÀ²ÃÃ³ÆÃ²Ä¾³Æ¿²ÄÃ±Ä¾°ÆÁ²ÅÃ¬Â¾³Æ¿¯Â½­ÃÁ°Ã¾°Â¾¯Æ¾®Á»°ÁÁ°Ã¿°ÃÁ²Ä¿®Å¾³ÄÃ±Â¾±Ä¾¯ÄÀ­Ä¾±Å½®Á¿°Ã¾­Á¼®À»°Ã¾°Â½­¿Á­Â¹¯Á½®Ã¾°Â»ªÁ½®Â»¬Á½°Á»¬Á»®¾»«¿»¬Á»°¾»®¾»®À¼ª½½­À»®Ã»®¿½®Á¹«Á»ª¾¸©½¸¬Á»¬¿»¬Á»¬À¹­½º¬¾»¬Á»¬¾¼­¾»®Á¸¬À»ª¾»¯¾»®¾¸«¾º®Á¹­Á»¬¿¸®¾¹¬½ºª¾¸«¾º«½º¬½¸«½»¬¿·©½·¬¾·©½¸¬¾¹ª»·«»·©¼¸¬»¸ª»¶«¹º­¼·©»µ«¼·¤·»¬¿·«»¶©»·ª»µ¨¼·¥½µª»³§¹·©¼¸¤¹¶©ºµ§º¶¨»¶§º·©¹´¨¸·§¸µ¨»²¦º³¦¸·©»¹©¹´©»´¥¹µ©¹­¨±¶¨·´©º³¦»·¥º·¨»·ª¸±¨¹µ¤¹·ª¹´¨¹µ¨»´©½µ¨»¶¦»µ§¹·«º·¤»·§ºµ¨¹¶¤½³¦·³«ºµ¨»µ¨¼¶¨»¶ª·º¦¼¶§¸µ¨»·§»·¬¹¸¬½¸ª¹¸«»¹¬»·¨»¹¨¼¸§¿»¬¹º©¾·¨¾¹©»»¬¼¹­»¸ª¾¼­¾º§¾¸©·º¨¿¹¬¿¹§¼¶ªº»­¼»¬¿·¨¾¹«¼º­»º«»ºª¾»¨½»«½¹©»¸¬º¹¨Á¼¬Àº®¾¼¬¾»¦»º«À¼®¿¼©½¹¬¿»©¼¾¬À¾­Á»®Á¾®À½®Á¾¯¾¾®À¿¬Á¾¯Á»³Á½±Á¾¯¾À¯Á¼¬¾½±Á¿®Ã½¯ÀÀ±Â¿²À¼­À½¯Á¼®¿»­À¼±ÅÀ­Å¼°ÁÁ°Á¾®ÃÂ°Ã½¬Ã¾²ÂÁ³Ä¼³Á¾®ÄÀ®Á¾³Â½°ÄÀ±Á»³ÅÀ¯ÆÃ³ÄÁ¯Á¾¯ÁÁ°ÃÀ±Â¿´ÀÁ±ÆÁ¶ÄÂ¶ÅÄ±ÃÁ³ÄÂ°ÈÁ³ÅÃ®ÄÂ³ÅÆ³ÈÂµÇÂ³Ã¿³ÆÁ´ÂÁ³ÆÁ±ÇÃ±ÄÁ¶ÇÃ³ÃÁ´ÅÂ´ÃÁ³ÆÃµÈÃ°ÆÃµÆÂ¯ÆÃ·ÅÃµÈÅµÆÅ·ÆÃµÇÃ¶ÆÃ¶ÆÆ¸ÆÃ´ÇÃµÆÃ´Æ¿²ÇÄ³ÈÃµÇÅ®ÈÅ±ÆÃ³ÈÃ³ÆÃ³ÈÃµÈÃ³ÊÄ·ÊÄ¶ÆÃµÈÄµÈÆ³ÇÃ¶ÈÃµÅÃµÊÈ·ÆÇ¹ÉÇ·ÊÆ·ÈÆ¹ÉÃ¶ÊÃ·ÊÆ¶ÆÈ³ÈÈ·ÆÆµÉÆ¹ËÆµÇÄ·ÊÈ¶ÉÆ·ÊÆ¹ÈÈ·ÌÇ¹ÍÆ·ÈÆµÊÄµÉÈ·ÊÇ¹ÊÈ¶ÊÆ¶ÇÈ·ÊÈºÌÈºÊÆ¸ÊÈºÈÊ»ÌÈ·ÊÆ¸ÊÈ·ÉÇºËÆ´ÌÈ·ÇËºÊÇ¹ÊÉ·ËÈ¶ÌÈ·ÌÉ·ËÊ¶ÌÆ·ËÇ¶ÉÈ·ËÇ´ÊÈ·ÊÊ·ÎÈ»ÌÈºÊÌ¸ÈÅ·ÌÌ·ÌÈ»ÌÉ»ÊÌ¹ÊË»ÌÉ·ÍÊ·ËÊ¶ÍÍ¾ËË¹ÐÍ½ÎÊ»ÍÎ¸ËÉ¹ÎÊ·ÐÊ·ÍË·ÍË·ÍÍ¹ÍÌ»ÎÈ½ÎÊ¼ÏÌ¼ÌÍºÐÊ½ÐÍ¹ÊÊ¼ÎÍ»ÎË¹ÌÊºÍË¾ÎÌ»ÌÐ»ËË¼ÌÎ¿ÎÌ¼ÐÌ½ÐÌ½ÎÌ»ÏÌºËÏ¾ÐÍ»ÎÊ¹ÌÍºÌÐ¾ÎÍ¾ËË½ÎÍ¼ÎÊ»ÐÌ»ÊËºÎÊ³ÌÊ·ÍÉ²ÈÆ¶ÆÊ»ÊÈ»ÈÉ·ËÅºÊÍ½ÊÍ¿ÍÎ½ÌÆºÊÌ¾ÈÈ¾ÊÈ»ÆÊ¸ÃÇ»ÇÈ¹ÈÆ¶ÃÀ¶ÅÃ¶ÃÆ·À½µÀÁ°½Ã°ÀÀ³Á¹³¼À²ÀÂ³½ÁµÁÃ¶¾Æ¸ÃÉ´ÃÆ¸ÅÉ»ÈÊºËÌ¼ÎÍ½ËÉµÉÅ¶ÄÌ¹ÈÎºÍÊ¾ÌÎ»ÊÌ¿ÎÌ»ÐÍ¼ÍÍ¾ÍÌ¾ÐÌÀÏÍ»ÌÌ¸ÊÍ»ËÈºÌÌºÌÊ¼ÌÊ½ÎÌºÐÎ¼ÍÑ½ÎÐÃÒÓ½ÐÐ¿ÎÏÁÏÐ¿ÐÐÁÐÌ¿ÎÎ»ÌÑ½ÎÏÁÎË»ÌÐ½ÏÍ¾ÈË¼ÏÎ»ËÈ»ÊÎ¾ÌÒ¾ÐÌ¾ÎÏÁÌÒÃÎÎÁÏÌ¼ÌÎ¹ÎÐ¿ÎÐÀÏÍ¾ÌÓÁÑÐÁÓÐ½ÍÐ¾ÎÎ½ÏÌ½ÍÍ½ÌÊÀÐÊ½ÊÍ¾ÌÍ½ÎÎ¸ÎÎ¼ÐÐ¾ÓÑ½ÐÎ¿ÐÎ¾ÏÑÀÏÏÀÒÎ¾ÐÎ¾ÎÎ¾ÎÑÀÌÊ¿ÎÐ½ÎÒÀÎÎ½ÑÍ¼ÍÐÁÑÎÁÐÐÃÏÍ¾ÍÎ¾ÎÐ¼ÐÏ¾ÍÎÁÐÏ¿ÎÐÀÎÑ¾ÐÎ½ÒÍÂÏÒ¾ÒÎÀÑÎ½ÎË¿ÑÒ¾ÎÐ½ÑÑ¼ÐÎ½ÎÎ½ÐÌ¾ÌÎ½ÐÎ¿ÐÎ¾ÐÎ¿ÎÐ¿ÒÑ¿ÐÎÁÍÍÁÐÏ»ÍÊ½ÎÎÂÐÐÁÐÎÁÎÏ»ÏÑ¾ÐÏÂÐÍÁÐÈ¾ÌÎ¿ÒÌ¿ÎË»ÌÊ½ÎË¾ÎÏ¼ÍÌ¿ÎÌ¼ÎË½ÍÎ¼ÍÎ¾ÐÍ½ËÌ¾ÍÊÁÍÎ¼ÍÊÀÍÏ½ÌÎ»ÍÌ»ÌÌ»ÌË¼ÌÌ¾ÍÊºÌË»ËË¾ÌÌ»ÎÌ¹ÏÈ»ÌÌ¼ËÊ½ÌË»ËÊ¾ÌÊ¾ÌÊ¼ËÌ»ÊÊ¼ËÊºÍÊ¾ÌÊ»ÊÊ¹ÌÈ½ÊÊ»ËÈ¼ÈÊºÇÉºÊÈ½ÌÊ¹ÊÇºÊÇ¾ËÉ»ÌÇ·ÉÇºÈÇ¹ËÊ¶ÌÇºÊÊ·ÈÈ¹ÊÇºÈÇ¶ÈÆ¸ÈÈ¹ÉÈºÊÊºÈÆ·ÈÊºÈÇ¹ÊÉ»ÊÇ·ÉÆµÊÇ½ÇÆ·ÇÆ¸ÈÈ¹ÉÈ¶ÈÆ·ÈÄ¹ÈÇ·ÇÈ·ÈÇ¹ÆÆ¸ÊÈºÆÅ¹ÇÆ·ÇÅµÃÇ·ÆÃ¸ÇÅ³ÄÃ·ÅÆ¸ÈÃ¶ÆÂ´ÊÇ¸ÈÃ±ÈÇ¶ÄÃ¶ÇÂµÅÄ³ÈÂ´ÆÃµÃÃ±ÈÃ¶ÅÄ·ÇÅ´ÆÁ¸ÃÆ¶ÆÂµÅÂ³ÉÁµÆÄ´ÄÄ´ÃÁ´ÁÃ´Á¿³ÆÄ³ÆÂµÃÃ³ÂÂ³ÈÃµÂÁ°ÂÁ²ÅÁµÀÁ²ÁÂ³Á¾³ÃÁ´ÆÀ³¿¾²Ä¿³Ã¼µÃÀ°ÂÀ±¾Â³ÂÁ³Ã¿³ÂÁ²Â¿°Ä¿³Ä¿µÃÀ±ÂÀ³À¾³Á¾²À¾¯Â¾°¾¾°Â¿®ÁÀ°ÁÁ³Á¾²ÁÀµÃ½³¿¾³ÁÀµÅ¼³Á¿´Ã¾±Á¼¯ÁÁ³Ã¾¯À½®À¾³Á¿°Á¹¯À¾¯Ã¾³Á¾­¿½±Â¿°¿¾¬¿¾²À¾¯¼½¯½½±¿½²Á»±¿¼­¿º®¿»®¼»­¾»®½¼­»»®¾»¯¿»¬¿½¬»½¬½¹®¼»¯»º°»¸­¾»®»½¬½º¬»º¬º¹«»º­¸º¬»¹¬»»¯½¼­º¹«¼¸¬º»¬»§°®¡µ³³²¢·®·®¸·£¶² ·³£¹²·²¡´³¡¸°·±£·±¤·³£¸³¡¶³¡¸®£»±¢º±¡·²¢¶²£¹³¢·´¢»³¢·¯¹²·³¡¹±¢·³¦»±£·±¥¹³»³£¹²©»µ¡¶³¥·³¶·¦»µ£µ²¥¹´¢½´¥º³¦¹´¢¸µ¤·¶£»³£»µ¥·´¦¼·¢¼´¤º·¥ºµ£»¸¥»µ¦º³¦»µ¥»·¥¸¹§»³£»·¤»¶§»¶¤½·¦»³§¾¶©½µ¥»·§»·¦¼¸¦»·¦¾¶¥½·§»»ª¾·¨¼·¥¾»ª½¸©¾º§¾¸¦¾·§¾¸©½º«À¸«¾¹§¿¹¬¾»ª¿¹ª¾¶©¾º©Á¹¨½º¬¾¸§¾½¬Á¼ª¾¹¦À»®¿ºªÃ»¨Â»¬½½¬¿¼©Â¹®Á¼¬¾¼«Á½­Á»¨Ã»­Á¹¨Á»­Â½«Á»ªÂ¾¬Ãº«Áº­Ã¾­Â¾¬¾½®Â»ªÂ»«Á¾¬Æ¼¬Ã¾¬Â½¯Ã½°Â¾«ÅÀ®Æ¾«Á¿°ÄÀ°ÁÁ±Ã¼°Á¼®ÃÁ®Ã¿¬Ä¾¬Ä¼¬Ä¾®Ã¿¯Ã¾°Ã¼®Á¿¬ÅÀ®Æ¿­ÄÀ±Â¿¯Æ¾±Æ¾­ÁÁ­ÄÁ¬ÃÁªÆ¿¯Ä¾­ÄÂ±ÈÀ®ÄÁ®Ã¿¬Á¾®ÆÁ¬Á»°ÆÁ°ÅÁ¬ÇÁ°ÆÁ±Å¾¬Ä¾±Å¿³ÈÀ°Ã¾±ÃÀ°ÁÁ°ÆÁ¯ÆÄ®ÈÀ³È¿­ÇÆ°ÄÂ±ÄÃ³ÇÁ®ÅÄ³ÇÃ°ÆÁ°ÅÃ´ÆÁ¯ÆÁ¯ÇÃ±ÇÃ°ÈÁ³ÊÁ¯ÆÆ³ÆÀ²ÇÃ²ÇÅ¬ÈÄ´ÇÃ²ÈÂ°ÊÂ³ÊÄ¯ÊÄ°ÈÃ³ÆÁ³ÈÆµÈÃµÆÁ®ÈÂ³ÊÆ´ÃÆ²ÉÃ³ÇÀ²ÈÅ³ÊÃ·ÈÅµÉÃµÊÆµÈÅ¶ÆÃ²ÈÄ²ÉÆ³ÊÆµÊÃ¯ÈÆ³ÈÄ°ÊÁ±ÈÆ°ÈÅ¶ÈÆ²ÆÄ´ÆÄ³ÊÂ²ÉÄµÈÅµÌÄµËÆ¹ÊÉµÊËµÈÅ³ÍÅ¹ÊÆ¶ÍÆµÌÃ¶ÌÇ³ÊÈ´ÇÆµÇÆ·ÈÇ³ÊÈ³ÊÅ·ÊÇ·ÊÅ³ÍË¸ÌÈµÊÈ·ÌÊ·ÊÅ²ÇÈ´ÊÇ·ËÆ·ËÊµÌÈ·ÌÆ´ÊÈ³ËÊ¶ÌÊ¹ÍÈ·ÎÇºÍÇ·ÌÈ·ÌË¸ÍÆ»ÎÌ·ÊÆ·ÌÆ·ÍÉ·ÍÈ¹ËÉ·ËÆ¸ÊÈ´ÊÈ¹ÌÌ·ÈÉ·ÈÇ¶ÉÅ³ÇÆ±ÉÁµÈÇ°ÅÃµÅÁµÆÀ´ÄÄ³ÄÃ·ÅÃ­ÆÄ´ÁÀ²ÁÀ°Á¾¯¼»­»¾¯»º§»·©º¼§¹¹©»·£µ°¤³¯£²¯¡·±£·³¤³­³ª ®¯§µ·®ºÃ¯½Ã°ÀÁ³ÀÆµÃÃ·ÅÇ³ÄÅ²ÅÀ²ÅÇ¶ÅÄµÇÊµÆÆ¸ÈÉ¸ÉÈ·ÍÇ·ÈËºÌÈ¸ÌË¸ÌÉ·ÊÄ·ËÄ³ÉÅ²ÈÆµÍË·ÊÈ»ÍÈºÍÌ¹ÎÊ·ÌÊ¹ÌÊ½ÍËºÎË¼ÌÊºËÌºËÊ¾ÌÆ¸ÊÆºÊÇ»ËÊµÌÉ¸ÌÆ¶ÈÆ·ËÅµÈÆ·ÉÇ»ÌÊ»ÍÏ»ËË½ÍÇºËÆ·ÉÆ¸ÊËºÉÌ»ÌÊ»ÌÎ»ÌÊ»ÌÆ¹ÊÉ·ÎÆ¸ÊÈ·ÊÆ·ÉÈ·ÉÍ¸ÌÊ¸ÎÊ¸ÌËºÌÍ½ÐÌ»ÎÊºËÌºÌÎ¸ÍÎ¹ÌÊ»ÌÉ»ÎÌ»ÊÌ¸ÏË¹ÌÊ»ÌÊ»ÎËºÎÌ·ÌÌºÎÉºÎÎºÌÌ¸ÎÊ¸ÌÊ»ÎÌºÎÊ»ÌÊ»ÍÍ¾ÍËºÌÊ¸ÍÊ¹ÎÎºÎÉºÎË»ËË»ÎÉ·ÊÎ»ÌÉ½ÎÇºÌÌ»ÍË»ÎÊ¶ÌÉºÌÌ»ÌÊºÌÌºÌÊ¸ÌÊ»ÊÌ»ËÉºÌÉºÊÌ¹ÊÊºÌÉ»ÌË½ÎÊ¸ÌÊºÉÊ¹ÎÊ·ÊË»ÊÌ»ËÊ¹ÊË¹ËË¹ÎÉ·ÈÈºÊÅ»ÌÌ·ÎË»ËÈ¸ÌÊ¶ËÊ·ÌÉ·ÌÈ¸ÌË¸ÌÇºÍÈºËÉ¸ËÉ¹ÊÈ·ÊÇµÇÇ¹ÇÈ¸ÈÇ¶ÊÆ¹ËÈ¶ÈÇºÈÉºÊÇ¸ÈÈµÈÃµÊÆ¶ÊÆ·ÈÇ·ÌÆ¶ÊÈ·ÈÃ·ÊÅºÊÅ¸ÊÉ·ÊÆ¶ÈÆ¶ËÅµÊÇ¸ÊÃ¸ÈÄµÇÃ³ÊÃ´ÇÃ³ÈÄ³ÈÄ²ÉÇ¶ÈÅ³ÇÄ´ÆÇ³ÈÄ¶ÉÃµÆÁµÅÀ³ÅÄ´ÉÅ³ÆÃ´ÇÄ²ÈÃµÉÅµÆÃ³ÇÁ²ÆÄ·ÇÄµÇÃ³ÅÁ·ÄÁ¶ÈÃ³ÇÂ±ÇÂ²ÆÃ³ÆÁ³ÆÁ³ÃÀ³ÆÁ³ÉÃ³ÆÃ´ÈÁ³ÆÃ´ÆÀ®ÃÁ¯ÃÀ°ÃÂ²Ä¿°Ã¾®ÆÀ³ÆÁ±Ä¾¯ÄÁ°Ä¾®Á¾²ÂÂ±Ã¾®Á½°Ã¼®ÃÁ¬ÂÀ¯Á¿¯ÆÀ²Ã¿®ÄÁ°Â¾±ÃÁ°Å¿¯Ã½¯Ã¾¯ÃÀ¯Á»°Ä¿®Á½±ÁÀ²Ç¿±Ã»®Á¾±À¾°Á½®Ã½¯Á½°¿À¬Ä¼±Á»¬¾¾«Ä¼°Á¾®Ã¼­Á¼¬Á½«Á¾±Âº°Á¾­¾¾¯¿»¯¾»­¾Á«¾»­¾º¬Á»¬¼º«¿¸­À¹¬À»­¿»¬¿»¬Á¼®¾»®Á¸®¾¹«Á»¬½»¬¾»®¾»®Á»®¾¼­¾½«¿»«½¼¬À»®Â½ª¾½ªÀº«½¶¬¾·ª¿»ª¾¸ª¾º«»¸¬½¸¬½ºª¾»©¾·©¼¸¨º¸«»º«º¶ª¼ºª»·«¿»§¾·©º¸¨»¸ª»¸©ºµ¬»´«»µ¨º·©»´¦»´©¸»©»¸ª¹µ£»µ¦¹³¨¼´©ºµ¥·¶¦º³¥¸´¦¸´¥»·§¹¬¥´´¥¶´¦·¶§¸¶¥ºµ¥º·¨ºº¨¸´¦·µ¤µ·¦¸³£º³§··§º·§¹µ¤»¶¨º¶¨»µ¨»µ¨º¶©··§··¦¹¶ª¶´¥¼¸«¸¸¨»µ¦¸¹©ºµ¨»¸©»·¨·µ¨¹¸ª»ºª»¶¬¾¶¨»¸¨»·©¹¶©¸º¬»·¬¾·¨¾µª·¸¨»»«¼º¨»»¬»¹¨»¶©¼¹±¾»¬·¸©¼»¬»¹­¼»«»¹¬À¸ª½½ª»»¨»·ª»¹¯¾½¬½¹ª¼¹¬¾»¬¾¼¬¾»­¾º©À»¬¾»­Á¾¬Àº°¾º§¾»¬À»¬¾¼­Â½®À½°Á»¬À»¬Á¾­À»²Å»±¼¾¯À¼²¿¿®ÃÀ¯¾¾­Á½¯¾¾­Á¼±¿½°ÁÁ«ÃÀ®¾½®Â¾¯Á¾­Å¿¯ÆÁ®Ä½²ÁÀ°Á¿°ÃÀ±½¿¯Á¿³ÂÁ®Å¿¯À¾­ÃÁ³Å¿³Á¾®ÅÃ²ÅÁ­ÅÂ³ÂÂ¬Å¿³ÂÄ´ÇÁ°ÃÃ³ÄÀ°ÅÀ±ÁÃ®ÆÁ±ÂÃ²ÃÃ°ÄÃ³ÁÁ±ÅÁ³ÃÃ³ÄÆ´ÆÂ²ÂÂ³ÈÂ³ÁÃ³ÆÃµÈ¿µÈÃ³ÃÁ´ÆÄ³ÆÃ³ÃÃ³ÇÁ³ÆÁ±ÇÃ³ÆÃ·ÅÂ´ÈÃ´ÇÁ´ÆÅµÇÄ³ÆÃ³ÃÂ²ÆÄ²ÈÃµÆÄµÇÃµÆÃ³ÇÈ´ÈÁµÆÂ²ÇÃ¶ÉÇ¹ÉÆ¶ÇÄ´ÆÃ¶ÆÄ°ÇÆ²ÆÂµÈÈ´ÅÃ¸ÆÆ³ÆÆ·ÉÅµÇÈ´ÈÅµÈÄ¸ÈÆ´ÆÈ¶ÆÂ·ÊÆµÈÈ¶ÈÆ³ÊÅ·ÈÃ»ÇÄ·ÌÃ¶ÈÃ¶ÇÄ·ÆÈ·ËÇµÇÅ¶ÈÅ³ÊÈ·ÉÈ·ÌÇ·ÈÉºÈÆ¸ÇÈ¸ÌÃ·ÊÈµÊÆ·ÈÈ¶ÎÈ·ÊÇ¹ÌÉ·ËÈ¸ËÊ·ÇÊ·ÌÈ¹ÌÈ·ÌÈ¸ÊÆ»ÊÉµÉÈ¹ÊÉ¸ÈÌ¹ÊÇ·ËÊ¹ÌÇ¹ÉÇ»ÎÈ¹ÌÉ¸ÊÈ·ÊÆ¸ÐÌ¶ÌÇ»ÊÌºÊÆºÉÉ»ÊÎ½ÌÈ¸ÌÈ»ÌÌ½ÊÌ·ÌÌºËËºÑÍ»ÌÌÀÉÈ¹ÌÍ½ÌÍ¼ÍÊ»ÌÊ·ËÌºËÉ¸ÌË¹ÌÊ»ÍÉ¸ËÌ·ÌÊºÐÌ¼ÍÊ·ËÊ¹ÍÌ»ÊË¹ÌË¹ÌÌºÌË¾ÎÊ»ÊÍ¼ÎÌ»ÌÌ½ÐÊ»ÌÎ¼ÍÎ»ÏÍ¾ÏÌ¼ÐÌ¼ÏÐÀÐÎ½ÎË»ËË»ËÈ½ÐÐ½ËÍ¼ÌÊ·ÌÌ»ËÌ¿ÌÌ¾ÐÌ¾ÌÊ¾ÏÎ¼ÌÌºÊÈ»ÈÆ¶ÉÉ¹ÇÅ¶ÅÁ³ÃÇ´ÆÄ³ÁÆ·¿Â³ÂÀ³¾¾³Àº­¼µ©·µ¬º´¬¸®¥´°©³±¥³¹¤²¶¡³³ ·³¢±²±±£²¯¢²¶´°¯ª¨©¡­¶¬³»¬¶Á¯¹Åµ¾Ã¹ÁÅ·ÁÂ¶ÂÀ³ÃÈ·ÅÅ¹ÆÍ»ÆÉ¼ÉÎ¾ÊÎ¼ËÍ»ÉÎ»ÌÏÁÎÎ½ÌÌ»ÌÈ»ËÉ¼ÇÌ¹ËÈ¹ÉÊ»ÈÍ¼ÍÐÁÐÎ¿ÐÐ¾ÎÐÁÎÏÀÏÎÁÎÌ¾ÍÏ½ËÐ¿ÊÊºÊÉºÊÈºÈË·ÊÇºÉÈ·ÉÇ¸ÆÄ¶É¾´ÂÃ¸ÈÆ»ÌÅ»ËÉ¼ÊÊ¾ÊÈ¹ËÊ¿ÌÎºËÎ½ËÎ¼ÎÌ¾ÐÉ¾ÌÉ¿ÌÍ½ÍÎ¾ÎÐ¸ËÐºÎÍ¾ÍÐ½ÌÏ¾ÐÍ¾ÐÍ¿ÎÎÀÍÍÁÎÒ¿ÍÓÁÏÏÁÎÒ½ÐÍ¼ÍÒ¿ÐÎ¾ÒÍ¼ÌÎ»ÎÑ¿ÎÏ¾ÎÒ¿ÑÎ¾ÑÐÁÒÐÁÏÎÀÏÒ¿ÐÐ¾ÐÎ¾ÍÍ¾ÎÎÁÎÏ¼ÒÐÀÏÎÀÎÎ¿ÎÏ¾ÎÐÀÓÐÁÑÐ½ÏÐÃÒÐÀÍÎ¾ÐÍ»ÌÎÀÒÎ½ÏÎ¼ÌË¿ÎÐ¾ÎÏ¿ÌÌ¿ÐÌ¿ÎÐ¾ÎÏ¾ÏÌ¾ÐË½ÎÐÁÐÎ¼ÐÍ»ÍËºËËÀÌÏ¾ÎÌ¼ÎÍ½ÐÌ¿ÐÍ¼ÌÌ»ÎÈÁÐÎ¼ÊÍÁÐÍ½ÎÍ½ÎÎ»ÌÍ¿ÍÎÀÍÎ¾ÌË¾ÑÍ¾ÎÎ½ÎÎ½ÌÎ¾ÐÑ¾ËËÀÌÌºÌÍ¾ÌÊ¹ÌÉ¼ËÊ»ÌÍ¼ÊÊ¼ÌÊ»ÌÊ·ËÊºÌÈ»ÊÈ»ÉÊ¼ÌÍ·ÌÊ»ÊÈ»ÌÊ¹ÉÊ¾ËË»ÌË»ËÈ»ÎÌ¼ÈËºÊÉ»ÊÈ¼ÊÉ¾ÈÌºÎËºÊÍ¹ÊË»ÊÈ½ÍÉ·ÈÊ¸ÊÈ·ÈÆ·ÈÊ¸ÉÆ¹ÍÈ¹ÉÊ»ÉÅºÈÆµÊÇ»ÇÊ¸ÉÇµÈÇ¶ÆÆ·ÈÈ»ÌÈºÇÈ¹ÊÉ¹ÉÈ¸ËÇ¸ÉÉ»ÅÇ¸ÇÅ»ÇÆ»ÊÅ¶ÆÈ´ÆÆ¹ÈÆµÆÄ¸ÈÈ·ÅÈ¹ÈÆµÈÅ¶ÈÆºÈÈ¸ÇÆ¶ÉÆ¹ÆÇ¶ÉÆ·ÈÅ¹ÆÅµÅÆ·ÆÅ¹ÄÄµÄÁµÆÂ¶ÇÄ³ÅÃ¶ÅÃ·ÅÁµÆÃ³ÅÂ²ÆÆ³ÃÂ·ÃÆ¹ÇÆ·ÆÃ³ÆÂ³ÃÃ¹ÅÂ³ÅÃ³Ä¿·ÅÃ³ÅÁ¶ÃÁ³ÅÂ³ÄÃ³ÂÁµÄÃ³ÃÂ³ÆÅ·ÄÂµÃÀ´ÂÀ²ÃÁ°ÁÀ°ÂÁ°ÆÂ´¿Â³ÁÁ³Â¾±¿Â´ÃÀ³ÁÂ³Â½°Â¾³ÁÀ°Á½®À¼²Â¿µÃÀ³ÁÀ°ÀÁ³ÂÀ²ÀÀ³Á¾³Á»²Â¿³Á½±ÁÁ³ÃÁ²ÀÃ´Ä¿²¾Á²Á½´ÀÂ±À¿´¿¿³ÁÀ³Á¾®Â¾³ÀÁ¯ÂÁ±¿¼°»Á¯Á¾¬¾»³ÁÀ³Å¿¯À¾²¾¼¯¿¾²¼¼¯Á¼¯¾»°¿À±¾»³Á½®¼»­½»¯À½¬¿¾¯»½®¾¼¬Á»®½»­»º­¾º¯¾¾¯¼º­»»­¾»®·»®»¹¯»·¯¾¹­¼¹¬»·­»·­½·®¼º®½»¯»·¬ºº¨¹º¬½·©»«¡±°¢·®µ±³® ¶±¢·±³°º®£·³¸±µ±¡¸® ¶²·±¥¶² ·°£¸³£´±¤·²¡¶®¡·²¶³»´¡·µ£¹²£»² µ´¤·´¢¶² ·´¡·²£·´£·°£¸³£·µ¥·³£º³ »µ ¹³§¸³§º³¢»²§º²¹µ£¹²¥·³¢»³¦º´§»´¡»³£»¸¦¾³¥»¶¡¼³¥»·¨»³§·µ¦·¶¥¹¶§º´©»·¢»·¥»¸¥½´¨º·¨»·£¼·§¼¶¦½·¦¹·©¾·©»·§¾·¨½·¦º·§¾ºªÀ¸§¾·«½»§Á·¨½¹©À·§Àº¬¾º¬¿»¨Àº«¼·«¿¼©¾¸¬¾¹ªÀ¹¨Àº¨¾¹¨¾º¬½¸ªÁº«¾¸©½¸©¾½¬À»¬Á»­Å»ªÆ»ª¾¹§¾¾¬Á»¬Â¼©Ã¾«À½«Á½¬À¼¬Á½¬À»§Á»«Ã¼«Â½©Á»«Á¹¬ÂÀ«Á¾­Âº«Ã¾¬Ä½¯Ã»¬Á½¬Âº°ÀÁ¬Ã¾®Æ½±ÂÁ¬Â¾«ÆÀ¯Ã½¯Ç½¬Ã¾®ÃÀ®Ä¾¬ÃÀ¬Á¾¯Ä¼³ÆÁ¬Ä½°Á¿®Ä¾«Ã½®ÄÀ®Å¼¬ÃÁ²ÆÁ¯Ä¾®Â¿¯Ä½°ÃÀ®Ã½¬ÃÀ²ÆÂ¯Å¾­Ä¿°ÃÁ¯ÃÀ±Å¾°ÅÁ®ÆÁ°ÇÀ­Å¾°ÄÀ¬ÃÁ´ÃÃ³È¾°Ã¾¯ÇÀ°ÇÀ°ÆÀ°ÆÁ²ÇÂ°ÅÂ®Æ¿®ÆÅ°ÆÁ±ÆÃ²ÆÁ¯Ä¿¯È¾±ÆÁ±ÆÁ­ÈÁ²ÆÃ²ÇÁ±ÆÄ³ÇÃ¯ÇÄ´ÊÁ²ÇÄ²ÇÁ³ÈÃ´ÆÄ²ÈÅ¯ÄÁ°ÉÂ®ÆÄ³ÇÁ­ÅÁ³ÇÃ´ÈÅ²ÈÃµÈÆ±ÇÇ¶ÇÃ³ÇÂ³ÇÆ³ÊÇ´ÊÄ³ÇÃ²ÊÃµÇÅ³ÈÈ´ÉÄ°ÊÃ´ÈÄ³ÈÇ¶ÈÃ³ÊÆ°ÉÆµËÁ´ÉÆ°ÈÄ³ÈÃ´ÆÃ²ÊÆ²Ç¿µÈÆ·ÉÇ³ÈÅµÊÅ·ÌÈ·ÌÆ·ÊÆ¶ÇÇµÌÆ·ÉÉ·ËÆµÉÈµËÈ·ÈÆ·ÊÄ±ÈÂ³ÈÄ´ÆÆµÌÇ²ÉÈ·ÈÆ·ÈÇ¶ÌÆ¶ÈÆ²ÊÇµÌÉµÊÈ·ÊÅµÌÉ·ÈÉ·ÊÆµÌÊ·ÍÈ»ÊÉ¸ÊÇ·ÈÈ·ÌÉ»ËÇ·ÎÉºÎÈ¹ÈÊ¶ÍÇ¶ÌÇ¶ÌÇ¶ÈÇ±ËÈ¹ÌÊµÌÉ»ÊÌ¸ÊË¸ÈÊºÎÈ¶ÌÆµÊÆ²ÅÀ°ÁÃ±ÄÂ¯¾¾¬¼¼«¾¶¨¸±£´®¡²«®¬°®¯±±««§¬­¬©¬§¬¦©¤£¥¥¡£¡¡¡¤¡¡£¤££«§²¥ª²§°»¯¹¿¬»Ã¬¾½®À¾¬¿½°¾¾³ÆÅµÆÆ·ÆÆµÈÈ·ÉÇ¶ÇÇµÈÇµÈÆ³ÉÃ±ÅÃ³ÅÇ±ÈÄ·ÇË·ÈÌ»ÊÈµÇÊ¹ÌÈ¼ËÌºËÉ¶ÈÈ¸ÊÆ·ÇÆ°ÆÀ³ÂÀ²ÆÀ®ÅÆ³ÅÇ³ÊÄ²ÈÂ¯ÈÆ°ÆÁ®ÈÂ°ÆÅ¬ÈÅ²ÇÃ±ÆÁ²Ä¾®ÆÄµÆÆµÌÈ¹ÊÇ·ÉÁ³ÇÄµÈÆ·ÎÌ¶ÈË¹ÊÈ»ÐÇ¹ÌÊ½ÌÊºÎÊ¼ÍÌºËÌºÎÌ¹ÌÊºÊÌºÐÊºÎÉ¼ÍÉ»ÏÌ»ÎÌ¸ÌÌ»ÎË·ÌÌºÎËºÍË·ÌÊ·ÍÌ¼ÎÍ»ÏÎ»ÎË½ÍÊ»ÑÌºÎÍ·ËËºÍÊ·ÌÈ¹ÌË»ÌÊ¸ÌÊ¸ÌÌ¹ÏÊºÌÈ¹ÎÊ»ÌÊ¹ÐÈ¸ÏË»ÌÍ»ÏÊ¸ÌÌºÌÌºÏÈ¼ÌÊ»ËÊ·ÊÉ¸ËÐ¸ÎÌ¾ÌÊºÌÍ»ÎÊ»ÌÊ¹ÎÊ¶ÌÊ¸ÍÈ·ÌÇºËÊºËÇ¸ËÉ·ËË»ËË¸ÎÇ¶ÊÊ¸ÈÉ·ÍÈ·ËÈºÊÇ¸ÎÊ¼ÉÊ·ÌÊ¹ËÊ¹ÏÉºÊÈ¸ÌÉ·ÊÊ·ËÉ¸ÌÊºÌÆºÊÇ·ËÊ·ËÈ¹ÈÇµÉÊ¸ËÆµËÈ¹ÊÅ¶ÊÆ¸ÉÆµÊÆ´ÇÅµËÈ·ÊÄ·ÊÇµÈÅ¶ÉÇ´ËÅ¶ÊÈ¶ÆÆµÈÇ¶ÉÈ¸ÇÈ·ÊÄµÊÊµÉÅµÉÄµÈÆ¶ÉÃ¸ÈÄ¶ÉÆ·ÇÃ´ÈÇ´ÊÆ´ÇÃ´ÇÃµÇÆ³ÈÂ³ÇÄµÆÅ³ÇÆ¶ÇÅ³ÇÁ¯ÆÂ³ÈÂµÆÃµÅÁ³ÇÄ³ÆÃ¹ÈÅ²ÅÃµÇÃ±ÅÃ³ÇÃ·ÇÃ±ÇÁ³ÄÃ³ÅÃ²ÆÂ²ÇÁ²ÇÄ³ÈÄ´ÅÂ²ÆÁ²ÆÁ²ÃÀ³ÂÁ²Æ¾®ÂÁ´Æ¿¯ÈÂ°ÆÃ³ÈÁ±ÇÁ±Ä¾³ÅÃ²ÆÁ±Ã¼³ÄÀ²Á¾±Ä¿¬Ã¿°Ã½­Ã»±ÃÁ­ÃÀ°Ã½²Æ¾°ÃÁ¯ÆÁ±ÃÁ¯Á¾¯ÄÁ±ÃÀ¬Á¾°Á¿°Ä¾¬Â¼²¾À­Å¾¯ÁÀ°Ã¾°Á¿°Ãº¬Â¾®¿½®Á½­Ã¾®Ã½°¿½¬Á»¬Á»«¾½®Â½¬¿¼¯Á»®Á»°Áº¬À»¬¼½©Á½«Ã¼®½¼­Â½±¾»ªÁ»­À¾®Á½ªÀ»¬À»®À»«½»¯À»­À¼°¾»­À¹¯Á¿®¾½«¾»®Á»«¾»­Áº¬À»«¾¸«½½®Á»®Á·­¾¸­¿»­À¸¬¾»®¾ºª»º«Á·ª¹»¬¾»ª¾¸ª¼»®¾½ª¾¶«»º©¾µ¬»·«»¶«½¸ª»¸§¾·§¼µ¥º·¬»¸©»´§¼·ªº·©»¸¥»·§»³§»¶§º·¨·µªº·§º·¨»µ§»´©¹·¥¸¶¨½µ§»µ©¸³£·´¥¸¯¦±³©³µ¦¹¶ª¶µ¦·´¥··¤»¶¤º´©·¶¢¶µ¦º´¨¸³¦¶µ§··¦º·¨·³ª¶³¨ºµ«·µ©¸´¥¹¸¨µ¹©»µ®»·©ºµª¸¹§·¶«¶¶«·µªº·¬¹·¨¶»¨»¹¬¸µ¨¹¹§º¹§»·«º¸¨¹º¬¼¸¥·¹¬·¶«»¹¦»·¨¼¹¬»¹¦º·­º¸©º¹¨»µ©»»ª»º©½º¬½¸¬¾»¬¼¸©··¬»·©»»¬½·¨¾·¬»º¬¼º¨ºº«»»¬½¹¬½º±½»¨¾¾®¾»¯¿¼¬»¼­¿ºª¾½­¾¼¯»Á®¾½ª¿»®Á¾­ÀÀ¬À½¯À½¯¿¼­ÀÀ²À½°¿¾¬Á¼°¾Á¯Á¼­¾À°¿Â®Â½®¿¾¬À¾¯Á¼±Á¿±ÅÀ°Á¿³ÁÀ¯ÁÁ°¿¿³ÃÁ°Ã¿®Á¿¯ÁÂ¯ÂÁ´ÁÀ²ÃÁ±Ä»µÂÁ¯ÅÃ¯ÁÁ³¾¿®ÂÂ´ÃÁ³Á¾°ÂÁ²ÅÁ°ÃÁ±ÀÁ´ÇÂ±ÃÁ±ÃÀ²ÄÄ®ÃÃ³ÅÂ¯ÄÄ³ÈÃ³ÆÃ³ÁÂ´ÇÁ³ÆÁ³ÆÅ³ÇÂ°ÄÂ´ÆÁ¶ÃÃ³ÃÄ¶Æ¿µÅÄ²ÄÅ²ÇÃ´ÅÆµÄÂ³ÈÁµÄÆ·ÇÅ±ÃÃ³ÈÄ³ÈÁ³ÆÄ´ÇÃ°ÇÃµÆÆ´ÂÄ´ÈÈµÈÇ·ÆÂ·ÆÆ³ÅÄµÆÅ¶ÈÆ¸ÅÃµÆÃ³ÃÅ¶ÈÃ°ÃÅµÄÂ¶ÆÆ´ÅÅ¶ÈÃ³ÆÅ¶ÆÆµËÃ¶ÆÆ¶ÅÃ·ÆÃ´ÆÈ¸ÈÃ³ÊÈµÈÆ¶ÆÃ¹ÉÃ·ÈÆ´ÆÆ·ÊÈ³ÊÅ·ÈÇ·ÇÈ¶ÈÆ¶ËÅ·ÈÆ·ÉÊºÉÇ¹ÆÆ·ÆÆ´ÈÆ¸ÆÆ³ËÇµÊÈ´ÈÊ¶ÇÉ·ÈÃ¶ÈÆ¹ÊÈ·ÊÊ·ÊÇ»ÊÅ·ÈÇµÉÌ»ÊÉ·ÊÊ»ÊÇ·ÉÇ¸ÇÇµÉÊ»ËÉ¸ÉÌºËÉ¸ÉÉ¼ÌÊ¹ÈÊºÈÈºËÈºÌÉ·ËÊ¹ÊÉ³ÈÊ·ÌÈºÈÉ·ÊË¼ÌÊ¸ËÎ¸ÌÊ½ÌÌ¹ÌÈ¹ÌË»ÊÊ¼ÎÉ¼ÊÊ¼ÊÌ»ÌÈ¹ËÊºÈÈ»ÊÊ»ÊÊ»ÌÈ¸ÊÊ·ÌÊ»ÌÊ»ÌÊµÉÇ»ÌÊ¾ÊÊ¼ÍÌ·ÊË»ÈÄ»ÈÊ¹ÎÌºÌÊ½ÍËºÊÎ¼ÏË¼ÌÌ»ÊÌ½ÎÌ½ÏÎ¼ÍË¾ÍÎ¾ÎÍÀÐÊ»ÌÈ¹ÊÌ½ÊÊºÊÍ¹ÍÌ½ÊÐ½ËÍ¼ÌÍ¼ËÌ»ËÐ½ËÊ»ÉÈ»ÆÈºÅÆ·ÂÂ¹ÁÃ¯¾¾©º³¤³¬®®°¬®²®²¡¯­¡¬®£¬³¬³®¬©£¥§¢¥¤¬¦©£¨£­¦¨ ©¡¬¡£ © ¨¯­­¹­³¾³¹Âµ¼Å°¼Å¶½Á³¾Ä·¿È¹ÆÈ¸ÂÌ¹ÄÊºÃË¼ÈÇµÃÃµÃÆ¸ÅÈ·ÆÃ¹ÉÏºÆÎ»ÈÊºÈÍºÌÊ»ÊÍ¾ÈÈ·ÈÅµÅ¿³ÁÂ³ÃÃ¶ÃÂ³ÆÆ·ÅÍµÉÈµÉÂ·ÇÊ¹ÊÐ·ÊÊºÈÌ»ÉÍ¼ÊËÁËÌ¸ÌÈµÈÈ³ÊÅµÈÆ·ÇÇ¼ÈÍ¾ÊÌºÎÐ¿ÍÐ»ÐÐ¼ËÒ¾ÍÊ¾ÐÌ¼ÍÊ¾ÌÎ¿ÐÑÁÌÐ¿ÍÑ¾ÒÐ¾ÌÎ¿ÐÐ¼ÑÎ¿ÍÐÀÎÒ½ÏÏ¾ÎÐÁÒÐÀÐÐ¿ÌÍ¼ÎÑÀÐÎ¿ÍÐ¼ÐÐÀÏÑÃÎÐ¿ÑÐÃÍÐ¼ÎÎ½ÐÎºÎÑ¾ÐÍÀÐÌ¿ÐÌÁÍÐ½ÍÍÀÏÒ¿ÎÎ¾ÌÐ½ÌÎ¾ÎÌ¾ÎÎ½ÐÐ¾ÎÐÀÌÎ¾ÍÐÁÍÎ½ÏÎ»ÌÍ¼ÌÌ½ÐÎ¿ÌÐÀÍÎ¾ÎÒ¾ÌÐ¾ÎË¼ËÎ¿ÍÎÁÎÍÀÏÐ»ÎÌÀÊÎ¾ÌÎ¼ÐÐÁÌÑ¾ÏÊ¾ÐÌ½ÍÍÀÎÌ»ÎÎ¼ËÍ¼ÐÎ½ËË½ÌÍÁÏÌ¾ÌÐ»ÍÍ½ÊÎ¿ÍÐ½ÊÎ¼ÌÍ½ËÎ¿ÎÎÀÏË¾ÌÐ»ÌÌ¼ÊÍ»ÍÊ»ËÌ»ÊÊ»ÌÊ¾ÊÊ»ÌÌ½ÊÍ¼ÊÊ»ËÊ»ÇÉ»ÊË»ÊÊ¼ÉÊ½ËÌ¸ÊÌ¾ÊÊ½ÍÊ¹ÊÌ¼ËÌ¼ÊÊ»ÍÉ¾ÈËºËÈ»ÊÉ»ÌÉ»ÊÊ·ÊË¾ÌÈºÉÈºÉÇ»ÅÊ»ÊÊºÈÈ·ÈÆ¼ÈÈ¹ÈÊ¶ÆÆºÉÊ»ÇÈ¹ÉÇ¹ÆÆ·ÉÊ´ÆÆµÈÉºÆÆ¹ÈÆ·ÆÈºÈÇ³ÊÈµÈÂ¹ÈÇ¸ÉÅ¹ÄÄ¶ÆÅ·ÆÇ·ÇÃ´ÊÂµÆÈ·ÆÅ·ÈÅ³ÆÃ·ÆÆ¹ÁÆ·ÇÇ·ÈÈ¹ÈÄµÇÄ¹ÈÅ¸ÆÃµÈÅ¶ÄÃ·ÅÆ¶ÆÆ³ÃÁ´ÆÃ¸ÇÂ¶ÄÅ²ÈÁ³ÀÄ¶ÄÁ¶ÄÃ´ÆÃ³ÃÃ¶ÂÆºÅÁµÂÁ°ÃÂ¶ÁÁ·ÃÃ±ÃÂ³ÅÁ²ÃÀ³ÅÄ´Å¿³ÂÃ³ÃÅ·ÂÃ´ÅÃ³ÃÃ·Ã¿´ÃÂ±¿Á±ÃÃ´ÂÁ´ÃÀ±¿¾³Â¾´ÆÁ³ÀÃ³Ã¿³ÂÁ³ÂÁµ¿Á³ÃÀ±Â¾³ÁÁ±Á¿°Â¿°ÁÀ±Ã¿µÁ¾°À¿³¿¾²Á½²ÁÀ°Ã¿³ÁÁ±ÁÀ²Á¾³Ã¿²¿À±¿Ã³ÂÁ³Ã¿³¾À±Á¾¯ÀÁ±ÃÁ´À¿±¿¿³»¾³ÀÀ¯¾»²À¿²Á¿´¾¿³À¿³ÀÁ°Á»±¾»¯½¿³¿À®¾»±½»°¿º¯¾¼²¾¹¯½»­Áº­¾º²½»¬»½°¾º¬¾»°ºº®¾½¯»»®¾¸¯»»¯¼·¬¾»¬»»¬¹·ª»»¬¼º«¼º®½¼­¾·­º¹­¼¼¬»µ¬¹¹«¹»¬»µ¬¸º­¹©°°µ² ·¯£·°¢·²£³¯¤¹³¡¶°£µ°´³¡µ³¡·²£µ±¡¸°¡´±¡·¯§¶³ ¸±¢¶³¥¶±¶³£´³¸²¸±¥µ´£¶¯¹°¥¸¯£·³¤·±£¸±£¸²¤·³¤¸¯¢¸³£¶²§¸²£¹³¢º´¤º´¤¸²¢»³¤¸³¦¹µ£º²¡¸³§»³¤¼´¢¸·¦¸´£º³¦º´¥º³¥½µ¤ºµ£»³¤»¶¥¾·£¼µ¦¹´¥¹³¦¸³¦»¸¥½³¥º¸¦»µ«»·©»µ§¾·¦»·§½·¦½·§½¹¦¾¶§¾·ª¾·«¾¸¨¾·¤»¹§¾¸§¿¸¦¾·§¾º§¾¸§½»§½»©Á·§Á»¨½»©Áº«À»«Áº¬Á·¨¾º«Áº¬¾»«À·¨Á¹©½»«À¸«À»«Áº«À»«¿»©À»ªÀ¹ªÂ¼®Á»¬Áº«¾¾®Â¼¬¾¼­Á¹¬¾¾®ÃÁªÁ¼­Á»­À¾­Ã¾¬Ãº¬À¾®Á»«Á»¬Ã»­Â¿©Æ¾®Á¾®Ä½¯Á¾¯Ã¾¯Æ¾¯ÄÀ¬Ä½¬Æ¿°Â»¬ÀÁ­Ä¼¯Ã¾®Á¾«Ä¾¬Ã½®Ã»«Â¾¯ÃÁ°Å¿®Á½«Ã½¯Á¾«ÃÀ®Á¿°ÆÀ°Á¼°Ã½©ÃÁ¯Ä¾¯Æ¾¯È¿­Á¾°Æ¿­Æ¿°ÃÀ¬Æ¾²Ç¾®ÆÀ±Æ¾®ÄÂ°ÄÀ­Ä¾²Å»°Æ½±ÇÃ­ÆÂ¬ÂÁ¯Ã½®ÄÂ®ÆÃ°Ä¾°ÆÁ²ÈÀ²ÈÁ°ÈÁ°ÄÀ±ÇÁ±ÈÃ²ÆÁ°ÄÃ²ÆÁ³ÆÂ²ÃÂ´ÈÁ¯ÇÄ³ÊÄµÇÀ²ÇÃµÅÄµÈÀµÆÃ®ÇÁ´ÇÃ´ËÅ¯ÅÁ²ÈÃ³ÈÄ´ÈÆ±ÇÄ³ÇÃ²ÈÃ±ÇÄ³ÇÄ±ÆÅ³ÈÃ³ÈÄ³ÊÄ²ÆÃ±ÆÈµÈÅ¶ÈÆ³ÈÄ²ÌÆµÉÇµÊÆ³ÉÄ°ÊÆ³ÊÃ³ÈÆ´ËÅ±ÆÅ´ÈÄ²ÈÄ²ÉÈµÊÄ´ÈÈ·ÊÃ¶ÉÆµËÈ¶ÌÄ¸ÉÆ·ÌÄ²ËÄ·ÊÃ³ÈÈ·ÈÅµÈÇ¸ÌÈ·ÊÄ´ÊÆ­ÌÄ²ÈÅ´ËÃ³ÈÂµÌÅ´ÈÈ³ÊÆ¸ËÅ·ÉÆ¸ÉÆ´ÊÆ³ÊÄ·ËÆ·ÈÆµÊÇ¶ÊÇ·ÊÉ·ÌÊ·ÍÉ·ÌÈ³ÆÊºÌÊ¹ÎÈ´ÈÈ³ÈÁ·ÈÇ³ÉÇ·ËÇ·ÊË¶ÇÊºËÇ·ÌÈ·ÊÈ¶ÈÅ³ÇÆ¶ÄÅ·ÇÆ·ÄÃ²Á¾«½´¨·³ µ¯±«®¬¬®««¬«© ¢ |rrzxw¬¨°£°·©±³¬°¸«¸·§¸½ª·»¯½¾¬ºÃ´¼Å¶ÃÃ°Á»¯»½²¼¿²ÃÆµÆÈ¶ÇÅ²ÄÁ±ÃÆ´ÆÁ²ÅÄµÆÆ¬Ã½¬Â»¨¿ºª¿¼®ÁÃ¯ÃÁ²ÄÃ²ÆÆ³ÈÄ²ÈÇ¸ÇÉ·ÌÅ¸ÉÌ»ÌÈ¶ÈÆ³ÈÃ³ÆÆ·ÊÆ³ÊÆ±ÇÆ¬ÊÃ·ÇÊ¹ÌÉ»ÌÉºÌÌ»ÌÌ¼ÌÎ»ÎÊ´ÌÉ¹ÎÈ¸ÉÉ·ÊÈºÎÍ»ÎË¸ÎÌ»ÊË¸ÏÌ¼ÎÊ¹ÎÎ¼ËÈ·ÎÎ»ÌË»ÐËºÏÌ»ÎÊ¾ÌË¹ÏÌ»ÌÊ¸ÌÌ»ÊÌºÌÎ¸ÎÇ·ÌÊ»ÌÈ»ÎË»ÍÊ½ËÌºËËºÌÌ¶ÌÊ»ÌÉ¹ÐËµÌÊ¸ÌÊ¹ËË·ÐÌ»ÌÊ¼ÐÌ»ËÈ½ÎÊ·ÎÎ¸ÎÊ¸ËÈ¸ÍÊ»ÍÊ¸ÎÇ¸ÌÊ½ÌÈ¸ÌÈºÌÈ·ÎÊ¹ÏÈ¸ËÇµÎÊ¹ÎÈ¸ÌÊ·ÈÇ·ÌÈ¹ÎÉ»ËÊ¸ÌÈºÈÊ»ÌÈ¸ÌÉ»ËË¸ÍÉ·ËÉ·ÊÊ·ÍÉºÈÇ·ÌÉ»ÌÇ¸ÏÈ¹ÌÇ·ËÉºËÉ»ÌÈºÌÈ¹ÌÈ¸ÊÈ·ÈÃ´ÊÈ¹ÈÆ·ÌÆ¶ËÈ¸ÊÆ¶ÊÈ·ÈÉµÌÆ·ËÆ¸ËÈ¶ÉÆ·ÊÆ´ÊÊ³ÇÆ·ÈÃµÊÆ·ËÆ¹ÌÇ¶ÉÇ³ÉÆµÊÅ·ËÇ·ÈÆ·ÇÆ³ÌÅ¸ÉÇ·ÉÄµÊÆ·ÊÃ³ÇÆ·ÈÅ²ÈÃ¶ÃÃµÉÃ´ÇÆ³ÇÂ²ÉÂµÇÃµÆÆµÇÃ´ÈÃ²ÈÁ´ÄÄ±ÈÂ°ÆÁµÄÃ²ÆÆ³ÅÂ¯ÅÅ³ÊÁ´ÇÅ³ÈÃ²ÁÁµÇÃ´ÄÁ³ÆÁ²ÆÂ³ÅÄµÆÁ³ÈÃ²ÇÃ³ÆÁ±ÆÁ¯ÃÁ³Æ¾²ÆÁ´ÅÁµÈÄ²ÆÁ³ÃÃ¯ÅÀ³ÅÁ³Ä¿°Æ¿´ÄÃ²ÇÁ¯Ã¾¯ÀÁ®Ã¾«Á»¯ÃÁ±Ã¾²Á¾¯Á¿®Æ¿°ÆÁ®Ã¾¯Å½±Ã»¬Â¾­Ã¾±Â¼®Â½­ÁÀ­Ã¿¬Á»­Á¹¯À»­Á»³Ã¼®¿¼­ÁÀ¯Ã¼¯Á»¯¿½®Á¼®À»®Á¿®Á¿®Á¾®¾»­Ã¸®Ä»¬¾¾­Ä»¬Á»­Áº¬Á»®Á»°Ã¼­¿¸¬Â»­¿»­¾¸«Á»­¾º«¾»¬Áº­¾»¬¿º²¾»¬¿¾«Àº¬»»«¿¾¬À¼­¼º­¾½®¾»¬Á»®À¸®À½¯¾º¬¾¸¬½º¬»»­À¸¬¾»¬¼¶¬¾·§½¸«»·«½·«»»«¾¶ª¾¸¬¾¹ª»·¨½·®»·©»·§¹¶«¾·ª¾·¦»·®»µ¨¼µ©··¨½¶ªº´ª»´¥ºµ¦¸³§¼·§»´ª¸´§¹·¥½¶¨··©ºµ§º²¨ºµª»·£º²§¸³¨»µ§»¬§³´©¸¶©¸³¢¶µ¨·´¨º¸¦º·§»´¤¶·¨µµ¦¶µ¥··¤¸·¨·¶§¸³¦¶¹©º¶¨¸¶§º·§¶·¦¹¹§»´¦º·§¹µª¸¹¦·¸§½¶¨·µ¦¹·¤·µ¬»µ§º·¨¹µ¨¸¶§»¶§»·©º»¬º¹©»µ©¼·«¹·ª»¶«»³©»·©¹¹ª½¸¬¾·§»¹ª½·ª½·©½¹¬½»¬»»¨»·¬¼·©»»¨¸ºªº¹¬½»­»»©»»®¼¸©¾º©¾»­»¸®¾¸¬¿¸ª¼¹ª¼¼«»»°¿º«½¸©½¼«¾º¬À¾­¿¸«À¹¬¾½®¾¼±¾»¬Á¾±¿¼­À»¯¾¾®¾¿³¾¿¬¿»¬¾¹©¼¾°ÁÀ°¿¾¬¾¾²Ã¾¯Ã¿¬¾¾¬À½¯¾¿±ÂÁ®Á»®Á¾±Ã¿¯Ã¾°Á»®ÁÁ®ÁÁ­Á¾­Ã¾³À¾¬Á¿±ÄÂ³ÂÀ­ÂÀ¯ÃÁ°ÂÂ³ÄÁ¯ÂÁ²Á¿®ÂÀ²ÁÀ°ÃÂ³ÆÁ³ÂÁ³ÄÁ³Â¿°ÄÂ°ÇÀµÃ¿±ÄÃ¯ÄÁ²ÄÃµÇÂ²ÅÁµÆÁ±ÅÃ¯ÄÁ´ÄÄ°ÅÁµÆÃµÅÂ³ÅÂ°ÂÂ³ÅÂ³ÆÄ³ÃÅ²ÆÃ³ÇÃ³ÅÁ´ÄÆ´ÅÈ´ÈÃºÆÂµÅÃµÃÄ³ÇÆ³ÃÂ¶ÈÄ³ÆÂ³ÄÆ¶ÇÆµÆÁ³ÆÅ´ÆÂ·ÈÃ¶ÈÁ·ÇÁ³ÆÅ³ÆÆ¯ÅÄ³ÆÂ´ÇÁ·ÆÄ·ÆÂ°ÅÈµÊÁ´ÇÄ¶ÆÇ¶ÈÇ¶ÊÈ¸ÈÅ´ÇÅ¶ÈÃ´ÇÇ¸ÊÅ¶ÆÄ¸ÆÆ¶ÇÃ¹ÉÆµÇÅ·ÈÊ¹ÊÈ·ÊÆ¸ÊÈ´ÆÉ·ÇÇ»ÇÈ·ÈÃ·ÈÄ·ÉÇ¹ÈÆ¹ÊÈ´ÇÃ·ÊÇ·ÌÈ·ÉÈºÊÈ¹ËÈ¹ÊÈ´ÈÈ·ËÊ·ÇÈ¹ÇÇºÌÇ·ÈÉ¸ÈÊ¸ÈÉ·ÊÆ¸ÉÈ¶ËÈµÌÈ½ÊÊºÊÌ»ÊÌ¹ÏÈ»ËÇ»ËÈ·ÊÊ¸ËÊ¹ÍÈºÊÈ¹ÌÌºËÅ¹ÊÈ·ÊÊ¼ÉÊºÌË½ÊÉ»ÊÉ»ÊË¹ÈÉ·ÈÈ¹ÌÍ»ÉË¼ÌÊ¼ÊÇ¶ÊÊ»ÊÊ»ÌÈ¶ÊÉ¹ÈÇ¹ÈÊ»ÌÉ·ÊÊºÉÌ»ÎÈ»ÉÈ»ÌÈ¸ÊÌ¹ËÊºÌÈ¹ÉÉ¹ÊÌ»ÌË½ÍÍ»ÊÌ»ËÊ½ÍÎ½ÊÌÀÍÌ¾ÊË¹ÈÈ¸ËË¸ÊÊ¹ÌÌ·ÈÈ¾ÐË»ÈÊ¾ÊÈ¼ÉÈ¹ÊÊºÈÉ»ÈÌ¼ÄÊºÂÁ²¾º®µ·¨³´¥³³®¯¬±ª¶ «¯¦¨¤  {|xxzuz{xuqqwz ¢ ¬ ¬¦¥£¬®¥¬­¤®¯¥¬¯¥¬¬¬®´¬´·­·»³»Á³¿Ã²¿ÆµÁÅ·¿Ã°ÁÁ±ÁÅ¸ÃÈ¹ÈÅ´ÀÀ°¿Á¬Á¾³ÂÀµÂ¿²ÃÅ·ÅÍ¹ÈÌ¼ËÌºËË¼ËÊ»ËÏ¾ÊÐ¿ÊÉ¹ÈÉµÈÅ¸ÉÍºÊÌ¸ÌÍ¾ÌÐ»ÍÊ¸ÉÈ¾ÊÎºÌÐÀÎÌ¿ÌÎÁÎÐ¿ÐÎ¿ÐÍÁÐÎ¾ÐÌ»ÎÉ¾ÎÎ¾ÏÍ¾ÎÏÂÐÏ¿ÑÏÀÐËÀÎÐ¿ÐÒ¼ÎÏÃÐÌ½ÎÑ¾ÎÐÁÎÏ¼ÑÎ½ËÍÁÍÐ¾ÎÎÁÏÎ¾ÒÎÁÎÎ»ÐÎÁÌÍ¼ÐÐÀÐÐ¾ÌÎ¿ÎÍ½ÍÎ»ÐÏÁÐÎÀÐÍÀÎÍ¿ÐÑÀÎÍ¾ËÐ¾ÐÐÁÎÐ¾ÏÎ»ÎÎ¿ËÏ¾ÎÐÃÎÎÀÐÍÁÎÎ¾ÍÎ¿ÐÐ¼ÍÌ½ÐÌ¼ÌË½ËË»ÌÎ¾ÌÊ»ÏÎÁÌË¾ÌÍ½ÌÎ¿ÊÏÁÐÍ¿ÌÎ¾ÎÎ¾ÌÌ»ÌÌ»ÉÏ¾ÌÌ»ÍÎÀÐÍ½ÌÌ½ÍÐ¼ÌÍÁÎÌ¿ÎË¼ÍÎ¾ÏË¾ÎÎ¾ÍÍÀÌÍ»ÍË¼ÊÎ½ÌÊ¼ÍÌºÊÊ½ÌË¾ÎÊ¹ÊÉ¾ËË»ÍÉ»ËÌ¾ÌÈ¼ÈÊºÍÊ¼ËÈ»ÇÌ»ÉÌ¼ÈÊ»ÍÌ»ÈÊ¼ÍÌ¾ÉÊ½ÌÊ¹ÊÉ¼ÌÊ½ÊÊ·ÈÆ½ËÊ»ÌÊ¿ÈÊ¾ËÌ»ÈÊ·ËÈºÉÉ»ËÈ¹ÆÉ·ÈÇ»ÌÇ·ÊÈ¸ÄÈ»ÊÅ¹ÈÈ·ÆÇ·ÊÇ¹ÉÇ¹ÇÈ·ÈÅºÈÈ·ÈÇºÆÇ·ÈÇ¸ÇÇ¹ÈÇµÈÃºÄÆ¶ÅÆ·ÇÆ¹ÆÅµÇÈ·ÌÊ¸ÆÆµÆÆ·ÆÃ³ÅÆ·ÈÅºÆÆ¶ÇÆ·ÆÄ·ÆÆ·ÈÆ¹ÅÇµÇÃ¶ÊÃ¸ÄÆ³ÆÃ´ÆÅ´ÈÄ·ÈÃ¶ÆÃ·ÅÄµÃÁ¶ÃÂ³ÆÁµÃÂ·ÃÄ³ÂÂ²Á¿´ÃÂ³ÃÁ·ÆÃ³ÅÂµÄÅ³ÁÁµÂÀµÆÀ¶ÁÃ¶ÂÀ´ÁÁ±ÁÃ³ÂÀ±ÀÀ°ÂÃ´Â¿²ÀÄ¶ÂÃ³ÃÀµÃÀ³ÁÁµÁÁµÄ¼´Á¿²ÀÀ´ÃÁ´Â¾³ÀÁ°ÁÃ³Ã¿´ÅÁ±Â¾²ÃÀ³¿½³Ã¾±Â¾³¿¿²Â¿µÂÀ³Á¾³ÀÁ³Á¾³Á¿³Ã¾²ÁÁ³¾¾´Ã¿³ÁÀ±¾À³¾¿°¿Á¶¿Â´ÀÁ³ÁÀ²À¾¯¾¿³Â¼±¾¾´¾¿³¿¿°Á»³¾¾²¿À±Á½°À¾¯À¼®¿½±½¼®¿¾¯¾¾­½¾²¼º¬½¿±¿¼¯»¾¬½¸¯¿¾®¼¸³½º­¾¹¬»»¯¾¹®½»¬¼»®»·¬¼»«»»­»¶¬½»¬»»¬»¹®»»¬¸º¯½º¬¿»¬º¹¬·»¬»º¬»¹¬º»«»¹­¼·«»·®º§¢±¯²°¡³±·²¡¸­·°¥·°¤¸²¶¯¡·¯¡µ±¢·°£·±µ®·³ ¶² ½°¶­£¸° ·±£¸®¡µ°¡¹µ¡¸´§¸°¢·´¡¹·¡¸°¢·±¡¸²¡»°¦¸±¡·²¤¸°£»³§¹³¡»²¦¸µ ¹³¦º±¦º²£¸±£·³£¸³¥ºµ¡¸´£¹²¦»³£º²¨»³¡»´©»³¥»²¤»µ£»µ£·¶§º¸¤º·£½·¥½´§»³¢º³§½´©»µ§»·¦»³£¼´©¼¸¨¾µ§½·¤»¶©»·¤º·§¼µª½¶¨¾¸ª¾·§¾¹¨½¸«¼·¨¾·¨À¹«¾¹©À¹ª¾¹¤À¶©½¸¨À¸©¼¼©½¼§¾¸ªÁ¹§¾·¦Á¶¬¾ºªÁ¹«¾¸©½·¥Áº­Ã½¬Ã¹«½¹«¿»¨Á¸¬Â»¬Á¸«Â¼ª¿¼¬¾¼­Â¸ªÀ¾«Á¼ªÃ¹«Ã½¬Á¾©Á»«Ã»ªÁ¸­Á¾®Áº­Â»°Áº­Á¾¬Ã¾®Á¾«Ä»¬Á¾¬Ã½¬Ã¼®Á¾°Ä»²Ä½«Å¾­Á½®Æ¾®Â¼°Æ¾°Ä½¯Á½°Æ¾®Ã»­Ã¿®Ä½²Æ¿­È½®Ã½¯Å¾­ÅÀ¯ÃÀ°ÆÀ­Ä¿°ÅÁ°Ã½±Æ¾¬Ç¾®Ã¿®Ã¾¯Ä¿¯ÆÀ®ÇÁ°ÄÀ°Æ¾®ÆÁ³Æ¿±Á¾¬Ã¾¬ÃÁ³Æ¾²ÆÀ¬Ã¿«ÄÁ¯Ã¾¬Å¾±Æ¾®Ã¿¯ÉÄ³ÄÂ±ÆÁ±ÆÁ°ÆÂ°ÈÂ®Æ¿°ÈÁ²ÆÀ°Æ¿±ÅÃ±ÃÁ²ÈÀ³ÆÄ²ÈÀ²ÆÃ°ÇÅ±ÆÄ³ÄÃ±ÇÄ³ÆÁ¯ÆÁ³ÈÁ³ÆÀ±ÄÃ°ÈÁ±ÆÁ®ÈÃ³ÊÃ³ÈÃ³ÈÃ±ÉÄµÆÄ²ÌÄ´ÊÃ³ÈÃ°ÉÃ²ÈÁ°ÈÆ°ÆÃµÊÄ±ÇÁ²ÈÃµÇÅ³ÉÃ¶ÊÄ±ÆÄ³ÊÇ¸ÊÄ³ÊÂ´ÇÇ²ÊÄ³ÈÇ¸ÊÃ´ÉÃ³ÈÆµÈÄ³ÉÆ´ÌÄ´ÇÇ³ÈÅ¶ËÆ·ÊÃ´ÊÄ·ËÅ´ÊÆ³ÈÄ³ÇÅ·ÊÆµÊÆ²ÉÃµÈÇµÌÁ²ÆÄ³ÈÇ±ÊÃ³ÇÅ³ÈÄ´ÊÆ³ÆÃµÉÇ³ÉÄ±ÇÇµÍÇ´ÊÄ³ÌÄµÊÅ¶ËÈ³ÈÈ¸ËÈ·ÉÈ·ËË·ËÆ¸ÌÆ´ÊÆ¸ÈÆµËÆ·ÈÄ³ÈÆ±ÉÁ´ÇÅµÆÆµÈÇ·ÅÉ·ÂÄ±¾»­½®©µ«¡³¬±­¬ª¨§§£¡|~|tqtqnlgizdwbxftgzfkng{k~flnt|ruw| ¤ª£¦¥¡«²¦±²©±º­¶¶ª¸·«·¸¬½À®Á¾²¾»§Á»³Â¾©Ã½ª½»¬Ã»­ÂÃ²ÃÆ·ÊÅµÈÉ¶ÈÆ·ÈÅ»ÈÆ·ÈÄ¶È¾²ÅÃ´ÃÈ²ÇË¸ÊÊ¾ËÈ¹ÊÊ¸ÌËµËÅ³ÈÆ·ÈÄ·ÉÉ»ÉÊ¹ÌÈ¸ËÊºÌÊ·ÊÌ·ÌÌ¶ËÊ·ÎÈ¹ÌÇºÌÊ¸ÊÉºËÍ½ÎÈ»ÎË½ÏÌ¹ÎÉ½ÐÌ»ÎÆ»ÎÊ¸ÌÊ·ËÌ½ÎË¸ÑÌ¹ËË»ÍÌ¶ÍÊ¾ÎÊ¸ÎÌ·ÎÊ¹ÎÌ¹ÎÊ»ÍÊ»ÎÊ¸ÌÈ»ÏËºÌÈ»ÎÊ»ÌÉ¸ÍÇ·ÌË¸ÎÊ»ÎÈ·ÌÈ»ÎË¸ÐË»ËË»ÎÊ»ËË»ÌÇ¹ÌÉ·ÍÈ¸ÎÌ¼ÌÊºÌÊºÊÊºÍÊ¸ÌÉ¹ÎÊ·ÎÊ·ÊÉ·ÌÊ·ÌÈ¸ËÇ»ËÈ¼ÑÉºÇÊ·ËÆ»ÎÈ»ÍÊ·ËÆ»ÊÇ¸ÌÉ¹ÌÈ¹ÌÊ·ÊÈ¸ÉÉ·ÍÇ¶ÉÈ·ÊÇ¸ËÊ¸ÍÅ»ÌÈ¶ÊÈ¶ÈÈ¶ÌÈ¸ËÆ¶ÉÇ¸ÈÈ·ÊÆµÌÇµÌÈµÈÆ¸ÊÇ³ÊÃ¶ÈÆ·ÊÆ´ÌÆ³ÉÄ³ÇÄ·ÊÇ¹ÊÆ·ÊÈ·ÈÊ³ÈÇ¹ËÆ¹ÊÄ¸ÉÅºÊÅºÊÇµÈÆ¶ÊÄ·ÊÆ¶ÈÄ·ËÆ¶ÉÄ¶ÄÇ·ÈÁ³ÉÄ±ÈÆµÇÃ´ÉÆ³ÉÁ¶ÇÀ³ÄÃµÆÄ²ÆÃµÆÃ°ÅÁµÄÃ³ÆÃ²ÃÃ±ÅÁºÈÂ³ÈÄ·ÅÁ¬ÃÀ³ÈÅ³ÇÀ³ÆÃ²ÆÂ°Ç¿³ÃÀ´Ä¿±ÆÃ³ÆÀ³ÇÃ°Ã¿±ÁÁ´ÆÁ³ÄÁ´ÆÁ´ÄÂ²ÇÀ³ÄÁ³ÅÀ±ÇÂ²Ä¿°Æ¾²Æ½²ÃÃ¯Æ¾±Ã¾®Á¾¯Å½¯Ãº±Â¼­Æ¿¯Á¾®Á¿¬Ã¾°Ä¾¯Ã¾°Ä»­Ã¾®Ãº¯Á¾±Ã½¬Ã¾°Ã»¬Ã¼°Á¼®Á¿­Â»­ÁÀ«Ãº¬Á¿®Â»«À¾®Ã¼±Ã½«Â½®Á½®Â»¬Á¼©À»­Á»«À»®¾º®Áº­Ã·«À»­Á¾­Á¹¬¿½±¾»¬Á½­¾º«¾º¬À»¬½º«¾¼¯Á¸«½º­¾»«¾»¯Á»ªÀ¸®¿»©¼¹«»·®Á»­¾¸®Á½­¿½­¿»«Á¼¬Áº¬¿»¯¾·¬½¹¬½¹¬¾¸®¾»«½»«À¸«¿¶®»º®À·¬»¶ª¿¸©¿»«½¹¬¾·©½º©¾µª½¶ª»µ©»·©½·«»·«º·©º³§¼³§»·§»¶©¹³©¼´§º¶©»´¥ºµ©»µ§¸·ª»µ¥½·¥¸µ£·´§»²§ºµ¦¸²§»µ§»³£·³¨·¬¤±µ§¶µ¦·±¤ºµ¨¸¶¦¸³¥¶·¤¹·¥¶·§»µ¨·¶ª·³¦··¦¶¶§··©»·ª¸·¦·¶¦¸·§¹µ¥¸µ¨¸µ¥¶µª··¨¸´«»·§¹µª»·¦¶³¦¹·©ºµª¸¸¨¶·¦»·§»¶¦··¥»¹¬»»§¹¹­¾¶«º·¨º¶«··©»¶§·º¬»¶¬½ºª»¶¥º·¬·»¨½¹­º¹«½¶¬¼»©À·©½º¬»¹¬½¸¬»¹¨½¹ªº·©½º¬»»­¾¸¬¾»¬¾»­½·«»»­¿»­ºº«½»¬½º¬¾¾¯»¹«¿¼¯¿»­ÀÀ¬¾»­Â¼¯¿¼¯½¾®Â¿®¿À¯Á¼±¿»®¿¼­À¼¬Á½¯¾¾­Á¾¯À¼±Á½­À¾¬À½²Ã¹¬À¼³ÁÁ¯ÂÀ­Ä¾³ÀÁ¯¾¾±ÁÁ®Á¼­ÁÀ°À¾³Ã¿±Â»®Ã¿³¿¿²ÆÃ®ÂÀ¯Ä¾°Ä½³ÂÄ³Ä½±ÃÃ²ÂÁ±Ã¾³Â¿²ÃÂ³Ä¾´ÃÂ¯ÄÁ´Å¿´Ã¿°ÈÃµÂÂ³ÆÂ³ÃÂ³ÃÁ³ÆÃ³ÅÁ°ÆÃ´ÅÃµÅ¿°ÂÀ³ÄÃ·ÆÃ¶ÃÃ²ÈÃ³ÆÁ³ÆÃµÇÂ´ÅÃ³ÇÅ³ÃÄ·ÆÃ³ÆÁ´ÃÆ´ÆÂµÅÆ°ÆÁ²ÈÂµÉÄ³ÇÂ¯ÃÆµÇÃ®ÆÇ¶ÅÃ³ÆÆ³ÅÄ¶ÄÃ´ÆÄ¶ÆÆ´ÅÄµÈÃ´ÅÅ´ÆÄ¶ÊÇ´ÈÅ³ÆÆ¶ÅÂ³ÈÆ·ÈÆµÈÃµÉÃ´ÃÃ´ÉÇ·ÉÄ´ÈÇ´ÊÄ¹ÇÅ·ÈÄ´ÆÅ¸ÆÆ´ÉÇµÈÄ·ÉÆ¶ÇÈ¶ÈÇºÈÇ¹ÉÇ¶ÈÉ·ÈÈ¸ÊÈµÇÄ³ÆÈ´ÆÆ·ÊÈµÇÆ´ÈÇºÇÈ·ËÉ¸ËÉºÌÇºÊÊ¹ÉÆ¹ÈÆ¹ÈÊ¶ÉÉ¹ÊÆ·ÅÅ·ÊÈ·ÉÈ·ÊÆ·ÈÉ·ÊÉ¼ÊÊ»ÉÊ·ÊÌºÌÊ¹ÊÇ¹ÊÊ»ÈÇ¸ÌÊ¹ÍÈ¾ÌÈµÊÅ¹ÌÈ´ÈÈºÊÉºÌÉ¸ÈË¼ÍÆºÊÌ·ËÉ»ÊÊ¼ÎÊ¼ËÌºÉÊºËÉ»ÎÍ¹ÉÊ¹ÊË·ÆÈµÈÇºÊÊ·ÊÉ²ÌÅ½ÈË»ÊÊ¸ÉÊ¹ÈË»ÍÈ»ËÈ¹ÉÈ¶ÌÈ·ÊÈ»ÊÊºÉÊºÊÊºÈÌºÎÌºÊÎ»ÌÌ¼ÌÍ¼ÊÊ·ËÆ»ÊÍ¼ÊË»ÊÊ¶ÈÈ¹ÉÈ·ÇÊ¸ÇÆµÉÇ¸ÄÉ»ÂÇ¸ÁÁ³»¸«·³§¯­¬¨ª«§­¤¦¥ |zzz|ozqlo~ozlzlzwf|r_zu_|ti{r`wxi{qqxzkzk~zo~wqonn{lqzz~¡¡ ¡¨¢¦¦§ª¢«³©³³¤³»®¾¿¯¾À°ÂÃµÃÀ°ÃÁ¯¿½°ÁÆ¶ÅÍ·ÆÆ¸ÈÊ»ÇÉºÇÆºÃÊºÆÆ·ÅÀ³ÆÅ¶ÅÊ·ÈÊ¼ÊÍ»ÈÊ½ÈÍ¿ÌÌÁÊÍ»ËÌ»ÉÍ¾ÈÊ»ÉÊ¾ÇÌ¾ÏÏºÎÎ½ÌÎ¼ÍÍÁÍÒ½ÑÎÀÐÐ»ÏÌ»ËÉ½ÌÌ¾ÎÎÀÎÏ¾ÌÒ½ÐÎ¿ÎÌ¿ÎÍÀÎÌÀÍÒÁÌÐ»ÐÎÀÍÎÀÍÎ¿ÐÎ¾ÌÏ»ÎÍ¾ÎÍÁÐÎ¾ÌÏ¾ÏÑÆÍÌ½ËÐÂÐÑ¾ÎÏÀÍÒÂÏÌ¼ÐÐÁÎÏ¼ÍÏ¿ÎÎ¾ÒÌ¾ÊÍÀÌÎ¿ÐÐ¿ÎÏ½ÎÒ¾ÎÒ»ÏË¾ÎÑ¾ÎÎÁÏÏ½ÍÌ¿ÏÎÀÎÏ¿ÌÎ¾ÎÐ½ÐÌ¼ÎÎ¿ÎÐ¿ÍÎ¿ËÌ¿ÐÎ¼ÊÏÀÍÌ»ËÌ¼ËÌ¾ÌÎ¿ÌÍ¼ÍË»ÍÐ¿ÎÎ¾ÈÎ¾ÌÊ¹ÌÎ¼ÎÌ¼ÊÍ¿ÌÊ»ËÎ»ÍÊ½ÍÉ½ÊÍ¾ËË»ÌÌ¼ÌÊ»ÊÌ¼ÏË¿ÌÌ¾ÊË¾ÊÉ»ÊÊ»ÌÊ¿ÌÉ¼ÌÉ»ÌË»ËÌ½ÍÊ·ÈÊ½ÈÈ»ÉËÁÌÉºËË¹ÎÊ»ÊÌ»ÊÊ¼ÊÊ»ÇÆ¾ÌÊ»ËÈ»ÉÊ¹ÇË¹ÊÊ¼ÌÌ·ÊÆ¹ÈÌÁÌÊ½ËÈ·ÈÆ¹ÉÆ·ÊÈºÉÇ¹ÈÆ¶ÈÈ¶ÉÅ¶ÊÆ¸ÅÆ¹ÆÈºÈÆ·ÇÅ·ÅÅ·ÆÈ·ÉÆºÊÅºÊÆµÆÈ·ÈÆ·ÄÅ¶ÇÅ¸ÈÈ·ÆÇ·ÇÃ´ÅÅ·ÆÆ·ÆÆ¸ÉÇ³ÆÅ·ÃÆ´ÇÅ¶ÄÅ·ÆÆµÆÃ·ÆÅ¶ÇÈ·ÊÄ¶ÃÇ¹ÊÆ¸ÈÅ¶ÄÅµÈÆ¶ÅÅ·ÃÅ·ÅÁ³ÄÁ´ÃÁ³ÅÄºÅÃ±ÄÃ³ÃÂ³ÆÁ³ÂÁ³Ã¿µÇÄ´ÁÃ³ÆÀ¶ÅÃ±ÂÃ·ÄÁ·ÅÂµÂÅ´ÅÀ³ÆÁ³ÆÁ³Æ¿µÆÁ³ÄÂ°Ã¾²ÁÃµÃ¾³ÂÁµÄ½´ÂÃ³ÂÀ³ÁÃµÃ½³¿Ã®Á¾´ÄÁ²ÂÁ³À¿³ÁÂ´Á¿³Á¿°¿¿´ÂÁ­Á¾´Ã¼®¿Á³ÁÁ³Á¾±ÂÁ°¿Á³Á¾³¾¿³Â¾®Á¿³»Á¯À¾³¿¾²ÁÀ±ÂÀ³¿½³Â¾¯¼¾³Á¿³¿Á±ÁÁ²ÁÀ³Á¼´ÁÁµ¿½²Á¿±ÃÂ¯À¾°À¿®¿¼²¾¼¬»¿±Á¼°À¾¯¾½±Á¾³¾½¯½¹®¾¹®¿»¯½»¬Áº¬¼º®½¼®½¸¬À»²»¹¯»»ª½¸¬»¹±¼¸­¼»ª¼·©½»ª¾»ª»¶³ºº¬¼¹­»·¬»·®½·ª»»¬º·¬»¹©¹·¬¹º®»¸©·¸¯ºª³­²¯ ¸¬¡¸± µ®¥µ® ¶±¶³µ¯µ°µ±£µ± ·± µ³£¸¯£·±¹²¢µ¬ µ±¡º±£·³£·¯¤¶° »³¡·°¢»³£º±¢·³¢¹´·±¡µ´ ¸²¤·±µ³¤¸°¥·µ£¹´¦º²¢¸´¦¹³¢·³£»³£¸·£·³¤º°£¸³§··¢»³£»±¤¹¶£¼·¦»·§»¶¦»´£»·¦»·§¾µ£½·£»µ¥½³¨¸µ¥¼³§»·¡»¸¢»·§»¶¦½¶ª¾º¤¼µ¦»·¤¾·«»·¬½·£»µ§»·¨¾¸ª¿·¨¼·¬»¹©¾¸«¿¸¨Á¹§À¸ª¾¹¬À¹©¾¶¤¾¸¨¼º¬¾·«¾·§¾·ª¾¸¬¾¹©¾·«À¸¬Á·«¿¸¨Áº©¿·«Áº«À¹©¿»§À»¬Ã¸ªÃ»¬¾º§¾¼­Ãº¬¿¼®Â½§À¼«Â¹«Áº«À¹¬Áº©ÁºªÁ»©Á¼©Á¸¯ÃºªÁ¾­Ä»¬Ä¾®Ã¼«Á»¬Á»°Ä½®Ã»¬Â¼«Ã¼«Ã¾¬Å¾¬Á¾«Á¿°Å½¬Ã¾®Á¼¬Ã»¯Ã¾­Ã¼®Ä½¬Ä¼¬Ã¿°Ä¿®ÇÁ®Ã¾®ÅÁ®Ä»¯ÃÀ¬Æ¾¬Æ¾±Ã¾­Ä½¯Â½°Æ¾°Æ¾±Å¼®ÃÃ­ÃÁ¯ÅÀ¬Ä½°Ã½¯ÆÁ²Æ½®ÇÀ±Ã¿¬Ã¿®Ä¾¯Ä¾°ÆÁ®ÅÁ°Å¾²Æ¿°ÇÁ®Ä¿²ÄÃ¯ÈÁ±Æ¾³ÃÁ²Æ¿­Ä¾°ÄÁ°ÈÁ­ÄÁ´ÈÂ®ÃÀ®ÇÃ²ÄÂµÈ¿®ÄÃ°ÈÃ°ÈÁ´ÆÃ²ÇÁ®ÈÁ°ÈÁ²ÈÄ±Ç¾°ÇÃ²ÇÁ³ÈÀ±ÆÃ²ÈÅµÈÄ²ÉÃ´ÇÃ²ÆÁ°ÊÅ³ÅÄµÇÃ±ÊÃµÆÇ±ÈÂ³ÈÁ³ÉÃ¬ÈÄ³ÈÃ³ÇÂ²ÇÇµÌÄµÉÄµÊÃµËÅ¶ÊÄ´ÎÃ³ÈÆ´ÊÄ´ÈÃ²ÊÂ´ÉÄ²ÈÇ·ÊÅ·ÉÅ´ÆÊ·ËÇ·ÌÈ³ÍÄ¶ÈÅ³ÈÈ´ÊÇ¸ÊÄ¶ÊÆ´ÉÈ´ÊÆ·ÏÁ°ÆÄ®ÊÃ²ÈÂ®ÆÃ²ÊÂ°ÆÃµÈÆ­ÇÄ¶ÉÃ¸ÈÈ²ÈÅ¸ÉÅ³ÌÃ³ÇÇ³ÈÅ¶ÊÆ·ÊÄ´ÊÈ¹ËÈ¸ÊÄ³ÊÄ·ÉÄ·ÉÃµÇÅ·ÇÃ³ÄÀ´ÆÄ²ÈÄ´ÆÅ±ÅÃ³Ã¿¯¾»«´²£³¢«¡§£¥££wwuutkxixgwg|l{`q`nW~n[{o[znWznUuiUxiQrfW|fWwgUxbWtkQzgYwgQwnWzi]xrbzzd|wgwf|u]{n]qYo`qf|tkzkxgzwt{wtz|¡§ ¬·¥·»¬¿½¬¾¼®¿º«¾¾§¿¿²ÄÇ·ÇÄ³ÅÀµÁÃ³ÆÃ²Â¼¯¿µ¬¼¹«¿Â©½¾­¿¾´ÀÀ¯ÃÂ®ÃÁ³ÇÄ·ÆÁµÆÅ¸ÉÃ·ÈÆ³ÉÇ¸ÈÆ³ÈÄ·ÉË·ÌÊ¸ÊÌ½ËË¸ÎÇ·ÌÌ½ÌÌ»ÌÈµÌÆµÊÅ¸ËÎ»ÍÊ¸ÌË¸ËÈºÎÎ½ÌÎ»ÍÈ¸ÌÊ·ÌÊºÎÇ¹ÎÊ·ÎÊºÎË»ÏËºÍÊ¶ÌË¼ÎÊºÌÊ·ÎÈ¸ÏÈ»ËÌ»ÍÊ»ÎÊ»ÍÉ»ËÊ·ÏÌ»ÐË¶ËÉ»ÎË»ÍÊ»ÌÊºÎÊ¸ÎÉ¸ÎÈ¼ÎÊ·ÊË¶ÎÈ¼ÌÊºÊÊ·ÎÉºÌÉ·ÊÊ·ÍÆ·ÌÉ»ÌÉ»ÌÈ¹ÍÈ·ËÊ¸ÍÊºÌÉ·ÍÊ¹ËÈ¶ÎÆ»ÈÊ·ÌÉ·ÈÊ·ÌÈ¸ËÉ»ÎÈ¹ÌÈ¶ËË»ËÆ»ÌÈ·ÌÆ¸ËÆ¸ÊÈ¹ÌÇ·ÌÇ³ÉÇºÈÈºÌÇ·ÌÈ¸ËËºËÉ·ËÇ·ÊÆ¶ÈÉ·ÇÇºÊÇ·ÆÇ·ËÈµÈÇ´ÊÈ³ÈÅ·ÊÄ´ÌÈ¶ÊÄ¶ÈÃµËÇµÊÈ·ÇÄ·ÌÅ´ËÃ·ÊÅ¸ÉÄ²ÊÇ³ÊÆ·ÈÆ·ÇÇ¶ÆÄ´ÊÆ³ÇÃµÆÃ´ÉÁ³ÆÅ·ÆÆ´ÈÄ·ÈÂ¶ÆÄ³ÊÃ³ÄÁ³ÆÂ²ÈÃ³ÈÆµÆÁ°ÅÁµÅÂ°ÇÅ³ÇÃ²ÄÁ³ÆÄµÈ¾²ÇÁ±ÆÃ³ÃÂ²ÈÀ´ÆÂ´ÆÃ²ÈÁ²ÄÃµÈÁ´ÄÁ³ÆÂ®Å¿²Á¾´ÆÀ¯ÃÃ³ÃÃ°Ç½³ÅÁ³ÄÂµÆÀ²ÆÁ³ÆÁ´ÆÂ³Ç¿´Ã½®Å¿®Æ¿°ÆÀ³ÃÁ±Æ»¬Å¿¯Ã¿°Ã½®Á½¯ÀÀ²Ã¿®Â¾¯Áº®Ã½¯Ã¿®Æ¾®Ä½¯Ã¼²Å¾°Ä½¬Á¾®Ã¾°Ã»­Â¾°Äº¬Â¾®Ã¼¯À»²Ã½®Ã¾²Á»¯Ã»¬Á¾«¿½­¾»¬Ã»­À»­Ã»¯Á»¬Â»­¿¹¬À½®Á½®Áº¬À¼¯Â½¬¼º­¾º¬Á¹®¾¸­Á¼«Á¼­¾º¬¿»¬À·ª¾»®¿º®¾»°½»­½¸­À¸«¾¸«½»ª¿»®À»¬¾¸®Â¹ªÀ»®¾¸¬¾º¨½»¬¾º«Àº©¾º¬¾¹¬¿¸§½º¬Àº«¾¹ª½·«½µ©½·«¾·©¹·«¸¸©»¶©º¶ª»·¬½¶§¼·¬»³§»¹§¹·¨¸´¨»·§»´¥»·«ºµ©»µª·µ§»´¨¸·§¼³§»´¦»·§»µ¥»´¥»µ¤·³§»´«¼³§¸³¦º³§»¸§¸­¤±µ§¸´¤µ´¤¶³§¶¶¦¶»§º¶¦··¢¸³¥»·§³·¨¹³¦·¶§·¶ª¸µ¨»´©¹µ¨·°¢··¦º·¦¹³¨·¶«»µ¥»»¦»¶ª¼·©»³©¹·¨··¦»·©¹´§ºµ¨¸·ª·¶ªºµ©º¶«½¸¨¸¶§º¸§»·¨»·¬»¼©º»¬»·ª¾¶§º·©½·©¼»©½¹ª·º¨»º¬»·©º»©¾º«¸»ª¼»¬½»¬¼»ª»»©¼¸¬¼¹¬»½°¾¹ª¼¾¬»»©¼»±¿¾ª¾»©»¹¬½»¬¿¾¬¿»¬¼»¬¿·°»»¬¾¼®½»¯½½®¾»®¿¾¬À¿³¾½­Á»­»½°Âº­¾»°Â½­¿º­Á¼¬¾»¬Á¼¯Á¼­¼½®Á¹¯Ã¿®¿À­ÁÂ¬¿½®Ã¾¯½»°ÁÁ¯À¾³Â¾¯¾º¯ÂÁ°ÂÁ±Á¾°ÁÀ°ÁÁ²ÃÀ³Ã¿³ÁÀ±ÃÀ²ÅÁ²ÅÃ¯ÅÁ°Ä¾®Á¾³ÁÀ³Â¾­ÂÁ³ÅÀ¯Ä¿±ÃÁ°ÄÁ³ÂÀ´ÂÀ¯ÇÂ²ÃÅ³ÄÁ³ÁÃ¯ÇÁ®ÆÃ³ÁÃµÆÁ³ÆÄ´ÅÂ³ÆÄ´ÃÃ±ÆÁ¯ÂÃ²ÅÄ³ÆÃ³ÂÃ²ÅÃ°ÃÃµÆÃ³ÈÁ¯ÆÃ³ÆÁ¶ÅÃµÅÄ¶ÃÄ³ÄÃ·ÆÄ³ÆÃ²ÈÃ·ÄÄ¶ÆÃ³ÃÃ³ÆÁ´ÆÂµÆÆ°ÃÁ³ÆÄµÇÁµÆÃµÆÂ³ÅÈ´ÆÆ³ÈÃ·ÃÄ¶ÄÄµÇÆ·ÇÁ¶ÇÄ³ÆÅ·ÉÆ·ÇÇ´ÆÃµÆÆµÆÅ³ÇÆ·ÈÆ¸ÅÇµÇÇ´ÆÆ¸ÉÂ·ÆÇ·ÌÈ·ÊÆ·ÈÈ·ÆÉ·ÉÆµÊÅ¸ÊÈ¹ÈÊ·ÈÄ³ÆÅ¶ÇÇ»ËÆ·ÈÈ·ÌÆ·ÆÆ´ÈÊ·ËÆ·ÈÇ¸ÊÈ¶ÅÉºËÇ·ÉÉ»ÉÉ»ÊÈºËÇµÈÉ·ÈÇºÊÈ»ÉÈ¹ËÆ¹ÈÊºÆÎºÌË»ÍÈ·ÉÆ¸ÈÌ¸ÌÊ¸ÉÉ»ÉÆ·ÊÇ¹ÉÊ·ËÉ¸ÊÈ»ÊÊ¹ËË¾ËÊºËË¸ÊÉ¹ÊËºËÊ·ËÈ¹ÌË½ËÊ»ÊË»ÊÊºÊÊ·ÈÈ·ÌÇ¸ÊÈµÇÆ¶ÌÆ´ÇÆ¶ÉÆ¹ÎÉºÉÊ¸ÈÈ¸ÌËºÈÌ¶ÌÌºÊÈ·ÉË·ÊÈ¹ÈÌ½ÌÈºÈÊ»ÌÊ»ÉÆ¹ÇÆ¹ÈÆ¸ÈÅ¶ÇÆ¶ÇÈ·ÈÈºÃÌ¹ÇÌ¹ÂÅ³¾»©¹®¬©¤ £¡z{uwtutnznl~tn~luguxdxo`zu]wo]zlbuo`wobzl]woYwobzg`ut]uq_uo]tqYuw_xu_wwdzrgx~izb~qd{wdxtdtbxug~ul|ixlzkzqzunzlzoz£§º®¶À¬»¾±¿¿®¾Ã¬Á½±½Æ¹ÃÇ¶ÆÄ·¾ÇºÆÃ²Á½¯¹¹¬»½¬¾Å´ÁÂ¶¼Å·ÁÇ¶¿È°ÁÆ·ÀÅºÃÆºÂÌ»ÊÊ¶ÈÈµÆÈºÆÂºÇÇ·ÇÌ¸ÈÌºÊÑ»ÌÍÀÍÏ¾ÐÍ½ÎÒÀÊÎÁÏÍ»ÏÑ»ÍÌºÊÎºÍÎ¿ÎÍÀÍÐ¾ÎÎ¾ÐÑÀÎÑ¾ÐÐ¿ÑÍ¾ÐÏ¾ÎÒÂÌÎ¼ÏÍ¾ÎÐ½ÐÒÁÒÒÁÐÐ¼ÎÐÀÐÍÀÎÌ¿ÑÎ¾ÐÍÁÎÐÁÏÎ½ÍÍ¿ÌÍ¿ÌÑ¾ÎÏ¼ÌÎ»ÎÏÀÊÍ¿ÐÐÀÎÌ½ÌÐ½ÎÑÀÌÎ¾ÎÍ½ÎÊ½ÐÌ¼ÌÎ¿ÏÐ¾ÎÍ¾ÍÍ¿ËÌÀÌÐ¾ÐÊ¿ÎÐ»ÌÎ¿ÎÎºÊËºÐÎ¾ÌÎ½ÏÌ»ÍÍ»ÎÐÁÎË¿ÐÌ¾ÍÌ½ÍÎ¾ÌÎ¿ÍÎ»ÍÌ¾ÌÌ½ÌÎ¾ÌË¾ÊË¹ËÐ½ÍÎ¿ËË»ÌÐ½ÎÎ½ÍÍ»ÊÌ¼ÍÊ¾ËÎ¼ÉÊ»ÊÌ»ÍÍ½ÍÊ»ÎÈºÌÌ»ÉÌ·ÈÉ¹ÊÍ¾ÊÈºÊÍ·ÊÈ»ÈÊ»ËË»ÊÈ»ËÊ¾ÍÊ¹ÉÈ»ÊÈ¼ÊÌºÎÊ·ÈÊ»ÉÇ¼ÉÊºÈÆ½ÍÆ¹ÈÊ¸ÆË¸ÊÈ»ÌÇ»ÌÊºÉÈ¶ÈÈºÅÆ¹ÌÉ¹ÊÆ½ÉÆ»ÌÆºÉÆ·ÈÆ½ÇÄ·ÈÇ¶ÇÆ·ÆÈ·ÇÆ¶ÆÃºÈÈµÊÄ¸ÆÆ·ÆÇ·ÈÇ¸ÈÈ¹ÈÇ¹ÈÅµÇÅ¸ÉÅµÆÆ·ÆÆµÃÈ¸ÆÄ¹ÇÅ¶ÄÆ¶ÊÅµÈÃ¶ÅÆ»ÈÃ¶ÆÅ¶ÆÆºÆÅµÆÄµÈÆµÅÄµÈÊ´ÅÃ±Ã¿³ÃÆ³ÃÃµÅÂ·ÂÃ³ÅÂ¶ÂÃ´ÃÃµÇÂ³ÁÂ·ÃÃ³ÄÂ³ÂÃ·ÃÃµÁÄ´ÄÂ´ÆÁµÆÂµÅÄµÅÃ³ÁÃ·ÃÁ¶ÅÂ³ÃÃµÂ¾´ÁÁ³ÃÅµÂÂ¶Â¿³ÃÀµÁÂ³ÅÃ³ÂÁ¯ÁÁµÂÁ³Ã¾³Â¿¶Ã½³Â¿³ÁÃ®Á½±ÁÂ¶ÁÁ°ÃÀ²¿¾³ÃÀ³ÂÂµÀ¿³ÃÁ°¾À³¾¼³ÁÀ²¾À³À¾´¾¾²ÁÁ²ÂÀµ¾À²¿¿³ÀÁ³Á¿²¾¿°¿Á³ÁÁ°Ã¾¯À¾´Á¾²¾¿¯½½±ÁÀ¯ÀÁ³Â¿³¾¼²¿½°¿Á°½¼±¾¿°¾½³¾½±¾½¯¾¾­»½¯»»­½»­¾»±»¾®¼º¬»»¬»º°¼¼¬»·®»¹­½º¬»»©Áº­¼µ¬¹¸¬»»­º·¯»ºª··«ºº®¾»®»¹­»·©¼º­¼»¯º·¬»·­º¹©»·«»º¬¹¥¡±¯¢²®¡²µ¶®µ±¢·°¡·³¸¯£º­¶®¢·°¤·²¡¶­£·°¢¶±¡¶²¡·³¶²¡·°¤·®µ¯¡º±¡²²£µ±¥·¯¡¹³¦·³£¹³ º²¢·®¥¸³·°¤¹³£½°¤¸µ¡º³¤»²£º³¢»±§»³¡¸²£»´¤¹´¥»²£·³¤»³¡ºµ§½µ§¼³£¼³¢¹¶§»´¥·µ¥»µ§¼·¡»·§¼¶¦»µ£»´ª»³¥½³¦¼³£»·¨¾´¤¿µ¥½µª»¹¨»µ¨»µ©¾¶©»·§»´©»·¨½·¨ºµ¤½¸§¾ºª½¹©½·§¿¸¬¾¸§»¸©¿·ªÀ¹©Áµ­¼·§¿¸§À·«½¸ª¾·¨½¸ªÁ¹§¿¸¨¾¹ª¾º©¿»«Â·­¿·§¿»ªÀº©À¸¬¿»¨¿¸©Á»§Á¹¨Ã»¬¾»©À¹©Áº­Á¹­Á»­¿»¬Á¾¬Á¿ªÀ½«Á¸«Ã¼«Á½©Ä¼¬Áº¬Ã¾¬Á»®Ã½«Ã»«Ä½­Ã½­Ã½¬Ã¾¬Å»¯Ã¾®Á¾­Á½¬Ä»®Ä¾¬Ã¼­Ã½®¿»«Æ¼°Ã¿®Â½®À½®Ä¾ªÄ¾­Ã»­Ä¾­Âº®Ã¾¬Ã¿¬ÄÁ®Å¾­Ã¾¯ÆÀ¬Ä½¬Ã¾®ÃÀ®Ä¿¬Ã¾²Ã½­ÅÁ¬Ã¼±È»®Ã¿®Ä¼±ÆÀ®Å»®Å»±Ä¿¯ÄÀ°Å¿²Å¾®Å»°ÄÂ®Ä¾­ÆÁ¬ÄÁ³ÂÀ³ÆÁ°ÆÁ°ÇÀ²ÈÁ¬ÆÁ±ÆÃ³ÆÄ²ÇÁµÇ¿¯ÆÃ²ÇÃ²ÄÁ³ÃÁ¯Ç¿³ÆÂµÄ¿°ÉÁ´ÅÁ³ÇÃµÇÁ³ÈÃ²ÇÁ®ÆÆ²É¾¯ÅÁ±Ç¿®ÅÆ·ÌÁ±ÊÃ²Ä¾³ÊÃ³ÈÃ°ÇÆ²ÇÁµÈÃ²ÈÆ´ÉÃ°ÇÅ±ÇÂµÇÅ³ÈÂ´ÇÃ³ÉÃ°ÊÅ³ÈÆ³ÆÅ¶ÊÆ³ÈÃ³ÈÆ³ÊÃµÊÇ³ÉÇ·ÈÃ²ÈÃ³ÇÄ³ÊÅ³ÊÄ·ÊÆµÌÄµÌÄ´ÊÆ´ÇÄ´ÊÇ¸ÌÇ¶ÈÄ´ÉÄ¶ÉÇ²ÈÆ¶ÊÆ°ÈÆ´ÇÆ²ÉÅ³ÇÁ¯ÈÃ­ÇÁ±Æ¾²ÇÄ³ÆÃµÊÅ³ÇÃ³È¿²ÈÁ°ÈÄ·ÆÃµÈÃ¸ÇÁ³ÈÆ³ÈÂ²ÆÂ°ÅÀ°ÈÁ®ÆÆ³ÇÅ²ÆÅ³ÈÆµÅÅ³ÁÁ´½»¨¸§­¡¦¢¥¢~{utn~l|nugtdw`zft]ndr`o`|q_zg]zgWxdQzdWxiMugUrgUugSxiUtgSwfUwiYwbSo`QodUo_Mn`Uo]UtbSr`WrdWul`wq]znYzq]wkUzgWuk[zgYwrfxwg|t[q[xfq`|l`xo[~n`~n_to|£¹£±³§¸»¤º¸«º¸¤»½©¾¼¬½»®»½­½¸¨·²¤³®£´¯¨³º¬³º®µ·¯³µ¬³±§´¸¨µµ°¸¼°»¾²¾¾¶½Ä·ÃÅ³ÃÃ¯Ã¾­ÄÄµÅÃ³ÄÅ´ÉÅ³ÆÊºÌÊ·ËÈ¸ÎÌºÉË½ÍÊ½ËÊºÎÇ·ËÅ¸ÊÊ·ÍÈ»ËÈ¹ËÊ½ÎÍ»ÎÊ»ÏÉ¸ÏÍ»ÎÈºËÊ¼ÉË»ÐË¼ÏÉºÎË»ÊÊ»ÎÉ»ÏÊ¸ËÊ¼ÎÉ¹ÌÌ»ÌÊ¸ËÉ»ÎÊ¹ÎÐ»ÌÇ¶ËÈ¸ÊÇ¼ÌË¸ÎÊ»ÍÊ¸ÊÆ¸ÎË»ÏÉ·ËÊ¼ÎË»ÌÊ»ÎÈ¼ÍÈºÌËºÇÇ»ÎÊ¸ÌÊ¸ÌÈ¸ÎÊ¹ËÈ·ÎÇ¸ËÊºÍÈ¸ÌÉºÊÈ¹ÌÊºÌÈ¸ÌÉ¹ÎÈµÈÇ·ÉÌ»ÍÉ¹ÌÊ»ÊÈºÌË»ÎÈºÊÆ¸ÌÊ»ÊÊ¸ÌÊ¸ÌÆ¸ÌÇ¼ÊÆ¸ÊÉ»ËË·ÌÇ·ÌÈ¹ÌÈ¶ÊÆ¶ËÆ¹ÇÈ¸ÌÇ¹ÈÄ·ÈÈ¶ËÈµÉÃ·ÌÆ·ËÄ³ÈÆ·ÌÆ´ÊÆ³ÆÅ´ÆÇ·ÌÆ³ÅÅ·ÊÃµÈÄ¶ÈÆ¸ÊÆ·ÇÄ·ÊÃ·ÈÅ¸ÈÁµÆÆ´ÈÇµÉÃ´ÇÅ³ÆÃµÈÆ·ÆÂ¶ÅÃ´ÇÄ´ÅÃµÅÂ³ÇÁµÇÁ³ÅÂ´ÉÀ³ÈÃ®Æ¿³ÆÄ³ÇÀ°ÇÃ´ÆÁ³ÈÃ´Æ¿³ÆÂ±ÆÄ±ÆÁ¶ÆÁ³ÈÁ¯ÄÃ³ÇÃ³ÆÀµÅÃ±ÆÀ´ÆÁ²ÈÁ°ÅÂ²ÃÀ°ÈÀ²ÃÁ·ÅÀ®ÄÁ²ÂÃ´ÆÁ´ÄÂ°Ä¿±ÃÁ°ÄÀ²ÆÁ±ÄÁ´Â¾®ÃÁ±Ç¾®Ã½²Æ»®Á»°ÁÀ¬ÂÁ²Ã¼°Ã¿¯Â½±Ã¼°Á¾²ÁÀ¬¿½®Â»¯ÀÁ­Á½±Ã¼¬Ä»®ÀÃ­Áº¯ÁÀ­Àº®¿»­Ã½®Â¼­Á¼¬Ã¾°½»­Ã»²Á½°Ã¾°À»±Ã»®¾¹¬Ã»¬½»¯¿»«Â»¬À»­Á½¬À»¯¾»¬¾¼¯Á¹®Á·«Áº¬¼»°¿»®À»®¾¹®¾¹«Á¸«¾º®¾º¬Á»¬¾»®¿¹­¼¼©À»­¾»®¿»«¾»«¿»¬½»¬½º­¾»«¿¸­À¸­½»¬½»¬À»«¾·¬¾»«¾·©»º¬¾¹¬¾¸ª¿·±¿¸«¾¸«»¸§»³«»º«Á³«¼¸¬»¸ª½·§»·¨»¸ª¾´¥¹¶¥»µª»µ¦»µ¥¹³¥»µ¤¹³¦»µ¦·´ª¸µ¨º²ª»·¥º·¨º³¦º²§»·¤ºµªº´§»µ©¹³¤¸µ§¸­§³¶§µµ§¸·¦µµ¥·³§·³«¹¶§º³¦ºµ§µµ¦·³§··¨¹´¨»´§·¸¨¸¶§¸¶¨¹·«º³©¹³¨··§¹¹©¹´ª·¹¨º·©·¶«¼¶«»¶©º·«·´©»¹¨½¶©¹¶¬»³¬·ºª»·¬»´§¸¹ª»·¬¹¹­¹ºª»º«¹·¦¹¸©··¨¼»«½¸ª··«»¸®»µ«¾·¬¿º«º·ª»·«¾¹ª¼»«¼·­¿»«¼¼­··¬¿¹¬½º«¹¼¯¼»­½ºª¾º¬¼¾¬¾¼­»º®¿¼¯º»¬½·¬¿¹¬¾¾¬Áº§¾¼­½¾¯À½±¿½­¾»´¿¼°¿½°¿¼¬Â¼®¾¼±¿»°À¼¬¾¾±½¾°Á¿°Á»³Á»°ÀÀ®¾½®Â¾­Á¼­Á¾°Á¾­¾À°¾¼¯ÁÀ±Á¿­Á¾³Â¿­Â¾®Ã¿°À¿®Á¾­ÁÁ¯Á¿°Ã¿²Á½³Á¿°Á¿°Â¾®ÁÀ³Ã¿¯Ã¿²ÂÀ²À¿²ÂÁ²Á¿°ÇÃµÄ¾®ÃÁ³ÅÀ³ÄÀ±ÁÃ´ÄÁ³ÆÂ³Á¾³ÂÁ¶ÅÀ´ÈÃ³ÆÃ³ÅÁ³ÁÃ·ÆÄ³ÄÃ³ÃÄ²ÄÃ³ÆÂ³ÅÄ´ÆÂ²ÅÃ´ÆÂ¹ÆÃ³ÃÃ³ÅÃ³ÃÃµÅÁ±ÆÃ±ÆÁ´ÆÃ³ÅÁ²ÆÆ¶ÄÂ·ÆÂµÅÅ´ÄÃ´ÅÃ´ÈÄ³ÄÀ·ÈÃ¶ÄÂµÈÃ·ÆÄ³ÆÅ·ÃÆ·ÅÅ·ÅÁ¶ÆÄ¶ÈÃ³ÅÂ´ÅÅ¶ÆÆµÇÉ´ÅÅ´ÈÃ¸ÈÆ²ÅÅ¹ÆÆ¹ÈÆ¶ÆÆ·ÆÅ¹ÊÆ¸ÈÂµÉÇ·ÈÆ³ÈÊ·ÇÄ¹ÊÆ·ÊÇ¹ÈÆ¶ËÈ¹ÉÈ·ÇÇ´ÇÆ¶ÉÆ·ÇÇ·ÈÅµÇÆ¸ÊÈ¹ÊÆ·ÊÊ³ÈÆ·ÇÊ¸ÊÇ¹ÊÈ¸ÉÈ¹ÉÇºÊÉ¹ÈÅ·ÊÈ·ÈÈºÊÈºÊÌºÌÊ·ÊÆ¸ÈÈ·ÈÌºÊÈºÊÆµËÊ¹ÊÆ¹ÊÊ½ÎÍ¶ÊÊ¹ÉÈ¹ÊÈ·ÆÈºÉÈ»ÌÌ»ÈË»ÌÉ¹ÈÉ»ÉÈ¹ËË»ÌÊµËÊ·ÊÌ»ÌÊ»ËÍ»ÊÈºÈÉ¹ÊÊºÉÊµÌÈºÈÊºÉÆ¶ÉÂ·ÈÃ¶ÆÆ¸ÅÆ¹ÉÆµÆÆ»ÈÊ¶ÉË¶ÌÈ¹ÆÆ·ÆÊºÈË¹ËÇ¹ÆÇ¶ÈÊ¸ÄÊ½ÊÉ¹ÇÊ»ÇÊ¾ÅÈ¾ÃÇ»¾Â³½²¨²¦¨¡¥¡¤  x{~xtru{n~noig|l{iukwgub{uf{u_zq]wrbxk]xoYqn_uo`uo`qrboibul[oi[okYniWll[uiWoi[og[qdYt_]oiUlk`un`wobz{gxu_to]wtbrn_wobtui~rf{tfzxg{ldwtd{t`zlb{odzoo¥·§°·®·Á¯»Á¬¾¶³ºÃ³¾¾¯·¼¯¶µ¨°¬¦­¤¦§¨¥¡ ¨¡£¢¡ ¦¦¨§ªª©¥«±¬­¯«¯³­³»³ºÂ·¾Â¹ÃÈ»ÁÊ¹ÆÇºÇÈ»ÆË»ÈÈÀËÐ¾ÌÐ¿ÌÎ¾ÏÎ¿ÎÐ¿ÎÎ¾ÏÐ¹ÌË»ÌÌÀÌÏ¿ËÎÀÎÒÁÏÒ¼ÍÑÀÑÒÀÉÍ¾ÎÐÁÎÐÃÐÎÁÏÌÁÍÑ¿ÑÎÀÌÐÃÐÑ¿ÐÐÁÎÐÁÎÌ½ÐÐÃÎÐÁÍÏ¾ÏÐÀÍÌ½ÎÐ»ÌÌÃÐÍÀÎÌ¾ÍÏ¾ÏÍ½ÎÐ¿ÍÏ»ËÍÁÐÎ½ÎÐ¿ÌÎ¿ÐÌ¿ÍÏ¾ÎÎ½ÌÍ½ÍÌ¾ÌÎ¼ÐÎÀËÌ½ÌÍ¾ÌÎ¾ÎÌ¼ÊÎ¾ËÒ¿ÎÌ¾ÐÌ¿ÌËÁÏÎ¼ÍÌ¾ÌÎ¼ÏÍÀÌÌÁÏÌ»ËÍÀËÎ¼ÌËÁÍÍ¾ËÌ¾ÌË½ÍÐ¾ÌÎ¿ÌÍ»ÎÌ½ÍÌ½ËÎ¿ÊÌ¼ÉÈ¼ÊÊ»ÍÌÀÈÊ¼ËË¾ÌÌ¿ÍÊ»ÊÊ¾ÊÉ¾ÌÉ¿ÌË½ËÊ¿ÊÈ¹ÌÊ»ÊÊ¼ÈÊ·ËÈ»ÈÊ¼ËÊ»ËÉ»ÉÊ»ÌÊ¼ËÉ½ÊÉ»ÊÈ»ÈÈ»ÊÈ»ÊÉ¹ÉË»ËÆ¶ÈÈ½ËÈ¹ÉÉ·ÆÊ¹ËÈ½ÊÊºÇÆ·ÊÌ»ÇÇ¸ÈÈ·ÇÄ¸ÉÊ·ÇÃµÇÅ·ÆÅ·ÈÆ»ÆÈ¸ÊÇ·ÆÅ¸ÇÈ·ÊÈµÆÃ¹ÇÈ¹ÇÉ»ÉÈ·ÈÉ¶ÉÃ´ÆÇ¹ÊÇºÈÅ·ÇÃ·ÇÄµÄÃ¶ÆÅ·ÅÅ·ÈÅ·ÅÄ·ÇÃ»ÆÅ¶ÃÃ¸ÃÈ¶ÇÇ·ÅÃ·ÆÃ·ÇÃºÃÅµÆÆ´ÆÃ·ÃÆ´ÆÃ¶ÃÃ·ÃÆµÃÃ´ÆÃ²ÁÄ·ÅÁ·ÇÅ³ÁÀ´ÇÃ³ÁÇ·ÄÄ´ÆÆ¶ÃÂ¸ÃÂ·ÁÃ³ÁÃµÂÁ´ÃÂ´À¿´ÁÁ³ÄÁ³Â¿³Á¿´ÃÂ²ÃÁ´ÃÁ·ÃÀ´ÃÃµÁÂ±ÅÁµÃÁ³ÁÁ³Â¾³¿À²ÃÁ³Ã¾³ÂÁ³ÁÀµÁÂ³Á¾±ÀÂ´Á¾¶ÃÁ´Á½²ÁÃ²Ã¾°ÁÁ²¾»±Â¿°ÀÁ³¿Á¶ÂÀ±Á½±ÂÂ°À¿±ÁÁ³Á¾³ÃÁ³ÁÃ´Á¾±¾¿¶Áº³Á¿°ÁÀ³¿¾³ÁÀµ¿¿´Á¿¬À¿°Ã¼µÀ¾³¾¼±¾»±¾»¬½½²¾¼¯¿»°¾¼³½»°½¾¯Á¼±½¾³¾º®¾»®»º²»»®À½¬»¹¯º»­¼»®º»¯½»±¼½¬»¸¬¾»®»¶¯»¹¯¼¸±¼»¯»»¬»·¬¸¹ª¼»²»¹¬»¶­¸¸¬º¸­¾¹¬·¨°® µ¯¤¸°£´¬¡µ¬ µ®µ±£·°¡µ°£·µ¡¶­¶°¡µ°£·³¡·®¡·¯ ¹± ¶°¢¶¯£·°·±¡¶­ ¶°¤¸²¢¹±¢·²¡·³£·³¤¶³¤·²º°£·³§»³£¸²¤¹³£¹²¤º²£¸³¢·³¡¼³£»¶¤»±¥¸³¤¹µ¥»³¥»´º³§»±¤·³¦»³¦º³¥»³§¹·¥»µ§»´¦»µ¤¼µ§¸³£¾´©¼µ©º´¥»µ£¸·©¾µ§»³¨»²¤»¶¦¼¶§¼¶©¾µ¦¾·§¾·¦¾·©¼³¤ºµ¨½¸«½¶§¼¸¥¾¹«¾¸¨¾·§½¸§¾»§À·©½¶©»¹«½ºª¾·¨Â»¬Âºª¾º¬¾¹©¾¹¤½¶ª¿º©Á¸©¿¹«¾¹ª¾º¤¿·¨¾¹«¿¹°À¸©¾¸ªÁ¸«¾º¨¿·«Â¹ª¿»ª¾»­Á»«Á¸©¾»­¾º®Âº¬À¹«À»«Á¸©¿¼«Â»¬À»«Á½¯Ãº­Ã»¬ÂºªÁ¾¯Á¾¬Å¾«À¾«Â»®Á½«Ã¾¬Âº«Á½¬Ä»«Ã¼®Â¿¯Ã¾¯Ä¾«Ä¾®Á¾­Ä¾¯Ã¾¬Á¾¬Ã½¬Á¾±Â¾­Æ»¬Ã¾®Å¿¬Á¾°Æ»¯Æ¿®Ã¾®ÇÀ°ÆÀ²Ã¾±Ä¾®Ä¾®Æ¾±Å½­ÄÀ¬ÂÀ°ÂÀ±Æ¾¬Ä¾°ÂÁ²Æ¾¬ÄÂ­Ä½²Ã¾¯ÃÃ³ÇÁ®ÆÃ³ÆÁ®ÆÁ²Æ¾¯À¿°ÇÃ±Ç¾±ÃÃ®ÃÃ°ÇÁ°ÆÃ¯È¿²Æ¿³ÆÁ°ÇÄ±ÆÁ²ÆÁ¯ÊÂ¶ÈÁ³ÆÁ´ÈÂ³ÇÀ³ÆÃ°ÆÁ±ÇÁ°ÉÀ­É¿³ÆÁ±ÈÁ²ÊÄ²ÆÀ´ËÃ³ÈÁ³ÈÃ³ÈÁ²ËÆ²ÆÃ°ÈÂ³ÈÄµÆÅ¶ÉÄ³ÊÃ²ÇÄ³ÊÁ³ÉÃ±ÇÄ·ÇÃ³ÅÄ³ÇÄ³ÌÆ²ÈÄ¶ÈÃ²ÆÄ³ÉÃ´ÉÆ´ÉÆ³ËÄ³ÉÆ¶ÆÅ²ÊÃµÇÄ³ÉÅµÊÅ³ÈÅ´ÇÇ³ÊÇ²ÊÁ²ÌÄ´ÊÃ´ËÆ²ÈÆ³ÊÆµÊÇºÊÆµÈÇ¸ÊÃ²ÈÅ°ÊÄ²È¾®ÆÂ°ÆÂ°Æ¾²ÈÊ³ÄÃ¹ÈÃ¶ÅÈµÇÄ¶ÈÅ²ÇÁ´ÆÄ´ÈÃµÅÃ¯ÄÃµÃÇµÆÃ³ÁÁµ¼¾®¼²±¢¨£ ~qlk~l~if{g|i~dnlg{fq`tYwf|wd{t[|nWzlWwiQq`QwdQudUndUtbOrfOndUubQq`Qo]On[OodKl_KqYQk]In]Ok_Mq[Mk_Ul`SqfWrgYtnWziQrdSrdUtgWtfUxiQqg_xkWqkWwlYxk[udY|f[zg]ok¨ª·§¶¶«µ³©¸·¦µ²¥²° ­¨©¢|{~¡ ¡¥§¨¬®±§²´ª¶½®º¾µ½Á³ÁÃµÃ¾²ÁÄ´ÆÇ»ÇÉ¸ÇË»ÍÍ»ÌÊ¸ËÊ·ÊË»ÍÊ¸ÉÆ·ËÇ¹ÍË¸ÎÍºÊÊ¸ÍÌ»ÌÈ¸ÎË·ÊÊ·ÌÆ·ÊÊ»ÎÊ¼ÌË¹ÏÌ»ÍÎ»ÎÊ¾ÏÈ¾ÌÈ·ÌÌºÎÊ»ÎÉ¹ÌÈ¹ÊÊ¸ÌË¸ÎÈ»ÊÊ·ÌÈºÌÊ¹ÍÈ»ÌÈ»ÌÇ¸ÌÈ¸ËÈºÎÊ¸ÌÌ¼ÎÉ¸ËÆºËÉ¸ÌÈºÊÈ»ÌÌ»ÌÆ¸ÎÉºÌÇ¹ÊËºÊÈ·ÊÊºËÈ¸ÊÈ¹ËÈ¹ËË¹ÌÈºÊÇ¸ÌÈ¹ÊÊºÈÇ¼ÎÄ·ÊÊ¸ÌÆ¸ÌÆ·ÊÈ»ÊÅ¸ÈË»ÊÈ»ÊÈ»ÌÊ¸ËÊ¸ÌÈ¸ÊÈ¸ÊÅ·ËÇ»ÊÅ·ÊÆ¶ÈÇ·ÌÇ·ÈÅ·ÊÆµÊÆµÊÇ¹ÈÅµÊÆ¸ËÄ·ÇÃµÈÄ¹ÈÆ¶ÈÅ´ÈÆ¹ÊÄµÇÇ¶ÊÆ·ÊÈ¶ËÄ·ÌÃµÈÄ·ÌÃ¶ÉÄ³ÈÄ¶ÈÅ¶ËÇ·ÈÆ¶ÇÄ¶ÈÅµÊÄ°ÇÃ¶ÆÁµÆÃ¸ÇÄ·ÉÂµÅÁ³ÈÃ°ÆÁ´ÆÃ´ÄÁ²ÅÄ´ÇÄ¶ÊÃ³ÈÃ°ÇÂ¶ÇÃ³ÇÃ³ÆÂ¶ÆÁµÆÁ³ÇÁ´ÅÁ´ÇÂ²ÆÁ³ÈÄ³ÈÁ³ÈÁ³ÇÁ²ÅÂ®Å¾®ÆÁ°ÄÀ²ÆÀ³ÃÁ´Æ¾²ÄÁµÄ½²Å¾±ÆÁ°Á¿¶ÄÁ²Æ¾®Â¾°ÄÁ­Ä¿²Ã¾®Ä¿®Ä¿²Ã¾®Ã¾²Ã¾¬Ã¿®Å¾°ÃÁ¯Á¾¬Å¼°Ã¾¬Æ¼²Á¿±Á¾°Ã¾¯ÁÀ¯Ã»¬À¾²Â¼¯Ã½®Ã½­Ã½®Â¼¯Á½¬Áº¯Ã¾®Â¼®À»¯Ã¾²Á»­Á¾®¿¹¬À¾¬Á¼®Âº¬Ã½«¾½®¾½°Á¾°Á»­Á»­¿»­¿º¬½»«Áº¯Ã»¯À¾°¾º«À·¬À¸«¾»­À»¬¾¸­Á¼®Á¹®À»±Áº­Á¼°½»¬¾º°Áº¬¾»®¿¸®Á¼«¼¹«¾½¯Á¸¬¾»«Â¸¬¼»¬¾»«¿¹­»º¬½¹¬½¶©»·¬¼·«½¹ª¼·¬»µª»·ª»·¬½·©¾¸«¼´ª¼·¦½¶¬¿µ©¼³ªº¶ª¾·©»µ§»·©¼¶©º´ª·¶§½µ¬»¶«¹¸§º·§¹³©»µ§ºµ«»µ§»´§¸´¦¹³ª½²¥¸¶¥¹µ«»¬¦³¶¨¶²£µ·ªº³©¸µ¨·¶¦¸µ¬º·¬¹µ¤··¦¸±¦³µ¨·³«º·¦¸·¨·´¤¹¶ª·¶¨¹¹¨µ±§º¶¨·µª¸´§··«··¦¸¶«»µ¦¹µ§´µª»¹©¸µ¥·¶ª»¶©¹¸«¶»§¾·­··¬ºº©º¶¬»»­½»¬µµ¬»·¦·¶«»»¬¼º©¹·¨»´«»¸¬»¼¬··«»¼¬½»¬½¸­½»¬¼¸¬½·­º·¬¼·¬¼¹¯»»¯Àº¬¼»¯¾º®»¹«¾º¬»»ª¾»¬½¾®¾»¯¼¼¬¾»¬¾½®À½¬Á¼®¾½­»¾®¿½¯¿½±Á¼­¼º¬¾¼¯¿¹¯¿¼¯¾¾®Á¾°À¾®¾»°Â¾¯¿¾°¿¾¯À»¯Á¿¯¿¾²Ã¼¯Ã¿®À»²¾½­Ã¼­Â»°ÀÁ²À¾²Â¼¯¿¿¯À¾³ÂÁ±Â½¯¿¼¬ÁÁ°Á¼³Á¾±ÃÃ°ÁÂ°Á¾³ÂÁ³ÂÁ°ÃÀ±Á¿±ÀÁ²Ã¾³ÄÁ±ÅÁ±Ã¾°ÁÀ¶Á¾°ÂÁµÈÁ¯ÂÀ³ÃÂµÁÁ±ÄÂ´ÆÀ°ÁÄ±ÅÃ´ÆÁµÅÁ³ÈÃ¹ÁÃ·ÄÃ³ÆÅ±ÄÁ´ÅÃ´ÆÁ³ÃÃµÇÃ´ÁÃ´ÆÀ°ÆÁ´ÅÃ´ÆÄµÃÂ±ÃÂ³ÆÆ´ÄÂµÇÆ¶ÇÃ´ÃÆ·ÆÃ´ÅÃ³ÄÅ¶ÄÆ·ÇÆ·ÈÃµÇÃ³ÃÂ³ÈÆ·ÈÂ¶ÆÅ´ÇÃ´ÇÆµÇÆ´ÆÃ³ÇÇ·ÆÄ¶ÈÆ´ÊÆ¶ÇÃ·ÅÃ·ÆÈ¶ÇÅµÅÈ¶ÆÆ¹ÈÆ¶ÇÉ´ÈÃ¶ÈÆ´ÈÅ¶ÊÈ¶ÇÇºÉÃ·ÉÇ·ÇÆ·ÈÈ´ÈÊ»ËÆ¸ÈÈ¶ÉÅµÊÈ¸ÌÆ¶ÈÆµÉÉ¶ÉËºÉÆ´ÆÆºÈÉ·ÊÇ¹ÈÈ¹ÊÆºÊÈ»ÈÆ¸ÊÆ¹ÉÈ·ÈÊ¼ÈÇ¸ËÈ¹ÊÆ¸ËË·ÉÈ·ÉÈ»ÈÈ³ÈÈ¹ÌÉ¸ËÉ·ÊÈ¹ÈÉ¹ÈË»ÈÇºÈÌºÊÉ¼ÌÆ¶ÊÊ¸ÇÇ¶ÊÍ¾ÊÊºËÌºÈÈºËÊºÊÈ·ÊÉ·ÊËºÊÉ»ÉÈ»ÎÈ¹ÊÌ¼ÌÊ»ËÈ¼ÊÈ»ÍÈ»ÍÉ¼ÌÌ¶ÊÉ¹ÊÄ·ÈÈ¶ÆÅ·ÆÃµÇÆºÄË¹ÍÈ¼ÈÉ·ÆÇ»ÉÄµÅÈ³ÅÃ´ÃÅ¹ÅÆ¸ÂÇ¹ÁÄ·ÁÂ±º´¬³¬¬£¢~{wttwuzqt|zqo~{dzn|oxow{gzn_xq`uk]tn`wn]tl]lg[qgWrlUnd[qgYnb[nd]q`QolUl`[rbUld[ldUlfWqbWki[qdYof]og`noftq]uo]wk_nn`wo_tn]ll_zn_tq_uofxrgur_|qd{uf|rrª¦¹ª´¹¦µ²¢±µ¦­¬©¢£¢¡ª¥§¶¬±¿°´¿µ¹Á¹ÁÆ²½Á¸ÁË¼ÃÊ¿ÇÍ¾ÊÎÂÎÍÁÐÎÀÌÎÀÑÏ¾ÊÏºÎÌ¼ÊÊÀÌÏ¿ËÒÁÑÐÁÎÎ½ÎÐ¾ÊÐ¾ÎÐ¿ÌÑÀÐÏ¿ÎÒ¿ÒÐÃÒÎ¼ÍÎ¾ÎÐ¾ÎÐ¿ÎÒ¾ÐÏ¿ËÍÀÎÏÁËÍ¾ÑÍ¿ÐÌÀÌÍ¾ÒÎ¿ËÐ¾ÍÍÁÍÎÀÎÍÁÍÍÀÏÐ¾ÌÎ¾ÐÍ¿ÊÎÀÎÎÃÎÎ¿ÍÍ¿ÎÍ½ÌÐ¾ÎÎ½ÐËÂÎÌ¾ÍÌ¼ÎÊÀÎÍ¼ÍÌ¿ÏËÀÌÏ½ÍÎÀÌÌ¿ÍÏ»ÍÊÀÍÌ»ÊÌ¿ÌÏ¾ÎÌ¿ÐË½ÍÍ¿ÌÍ¾ËÌ¾ÍË¾ÎÎ½ÌÍÁÎÐ½ÎÎ¾ÊËÀÊÎ½ÌÍ¼ÌÊºÊÈ»ÌÊ¾ËÎ¿ÊË»ËÊ»ËÊºÌÉ½ÊÊ½ÊÍ¼ËÌ½ÊË»ÊÈºÉË»ÊË»ËÉ»ÌË¹ÍÌ½ÊÌ»ÉÌ»ÍÈ»ÊË½ÊÈ½ÍÊ½ÌÉ½ÊÈ»ÈÊºÈÊ»ÉÌºÈË¶ÈÈ¾ËÇ½ËÈ·ÈÇ¹ÇÈºÌÈ¹ÊÈ¿ÇÈ»ÃÆ»ÊÆµÈÈ·ÈÆ¼ÈÉ»ÇÈ»ÈÆ·ÈÇ·ÈÈ»ÆÉ·ÈÉ»ÆÊ¸ÆÇ»ÈÇ¼ÆÄ»ÆÃºÅÇ·ÉÇ·ÄÇ¶ÇÈ¸ÇÄ¶ÈÅ¶ÈÃ·ÈÆ´ÆÆ¸ÇÄ·ÇÆ´ÇÆ¶ÈÇ·ÆÃ¹ÃÅµÄÃ¹ÊÆ¹ÆÄµÄÅ¹ÆÆ¸ÂÆµÄÃºÄÃ¶ÃÁ·ÂÆ¶ÅÄ¶ÈÅ·ÆÃ·ÆÁµÇÀ³ÂÆ¶ÄÃ³ÂÃµÅÃ´ÆÀ¶ÁÃ´ÇÂ¶ÄÅºÅÃ´ÅÂ·ÀÂ·ÁÀ´ÄÃ´ÄÃµÂÂ³ÃÁ´ÁÁ³ÃÁ³ÃÂ³ÃÁ¶ÃÁ³ÂÁµÀÃ³ÈÁ¶À¾³ÂÂ°ÁÀ¹ÂÀ³ÁÁ³Ã¾¶ÃÂ´ÂÀµÁÂ³ÀÀ³ÀÁ³ÁÀ´ÁÀ¯ÀÀ´ÃÃ´Ã¾µÂÀ³Á¾³Á¿³ÀÀ³Â¾°¿¾³ÁÀ³¿¿³ÁÀ±Á¿²¾À°¾ÁµÁÁ±Â¾±ÁÀ³Ã¿³Á¿´Á¼²¿¾³Á¾°ÁÁ´¿¾³Á¾³À½³¾Á³¾¿²¾¿±½¾³¾¾±¿»³½À¯Á¿°½»±¿½³¹¾±¼¹®¾¼³¾¼®¼¾¯À·¯¾½¯º½°¾»¯»¾°½»¬¿»¬º»¯»º¯¾¹±¼·¬»»°¼»­½»­¾¸±¼»¬¼¸°»»®¹º²»¹¬ºº®»¹¬»·­½¼®µ¹®¼¶±º«°¯¡µ®¡¶±µ²µ¯ ³´¢º±³²³±¢·²·° ¶°¡´±µ±¥µ³¤¸±¡³³£·±¢¶±´²·­¡µµ¦·³£·²£·®³°¡·±¡¶±£µ³£·²¤µ³£·²¤·² ·³£¸³¡¸³¨¸² »³¤¸´§»¶¥¼²·µ¦·³§»³¦¸²¡¹´¢¹´£¸³¨¹³¦¹µ¥»¶§¹³¥¼¶¤»¶¨»µ¥º¶£»´©»³¥½º¦»¶¤½³©½·¦¹¶£º³¡º¶¦ºµ¤·¹¦¼·§¼·¥·³§»·¤¼·¨¾·§¼µ§¾·¥¼»§¾¸¬»·ª»½§»¸§¾·¦½µ§»¸§½¹ª¾»¬¾»«Á»¦¾¶¨¼»¨¾¸¦½½©½¼ªÁ·§½¹§À»«¼¹©À»¦¾»©À·©¾»«À¸ª¾¸©¾¾ªÀ¹¬Àµª¾ºªÁº¬ÁºªÀº§À½§½»­Á»«À½©¾º«¿»©¾¼«¾»¨Â¹®Á»§Á½¬¿ºªÁ¼¬Á»°À½ªÂ½¬Á¹©Á¾¯Ã¼®Ã½­½½­Ç¾¬Á¼®Á¾¬Á½­ÃÁ¯Â½¯Æ½­Á¾¬ÄÀ°Ã¾¬¿¾¬ÂÁ¯ÃÂ­Ã¾°Äº«Á½¬ÃÀ¬Ã¿®ÁÀ®Ã»®Ä¾°Ã¿®Á¼®ÃÀ­ÃÂ®Å¾°Ä¾®ÄÀ¯Ä¾®Ä¿®ÅÀ®ÁÂ³Ä¿¬ÃÁ°Ä¾²ÆÁ°ÆÁ±Ä½±ÃÃ³Ä½²ÇÁ²ÇÀ®Æ¾²Æ¾¯ÇÃ²ÄÂ³ÆÀ°ÈÁ²ÆÀ²ÅÃ²ÆÀ²Æ¿¯ÄÁ­ÆÀ°ÆÁ°ÃÀ±ÆÃ²ÈÅ±Å¾±ÊÂ²ÆÆ³ÆÂ´ÆÂ®ÆÁ³ÆÁ°ÈÂ±È¿³ÃÅ²ÇÃ´ÉÃ³ÃÃ³ÇÁ®ÆÇ³ÆÃ³ÇÄµÈÃ¯ÇÄ²Ã¿³ÉÃ²ÆÃµÆÆ²ÉÁ°ÇÆ°ÇÃ³ÈÆ³ÇÄ³ÈÃ´ÆÃ²ÇÆ´ÊÆ±ÊÅ²ÆÆµÈÆµÉÆ²ÊÄ²ÇÃ°ÇÆ´ÊÄ·ÈÅ¯ÈÆµÊÅ³ÊÅµÉÄ¶ËÄ³ÆÇ³ËÅ±ÊÄ²ÈÄµÈÄ´ÉÆ·ÉÆ²ÊÄ³ÈÇ±ÈÆ´ÊÇµÊÄ³ËÄ³ÈÄ¶ÊÇ³ÊÆµÇÇ´ÆÄ³ÆÃ´ÆÁ²ÅÂµÊÁ¯ÈÄ³ÄÂ¯Â¿°Ã¾¯Ã¹­Á»ª¾¾®¾½¯½¾¬»µ¬´²¦±«¬ ¥zz|zuqnquzxnwdw_{ofu[~t`|lW{l_wl[tnWuiYtiQudSudSrfMwgQtgUoqQtfKk_Sk`Mn]Oq]Mk]InbKkYMl[KnYOlYIk]MkYMi]OgYMi_Kn]QoYOl]Ml`SogUqdQl`KnbQtbStgSqfWr`UtkYrqYwkYzkYwi`zx_~n]|®­«©­«£¤|zunqkbxn{izk~udxgwnxt{r~lux¥£®©¬º¬³»¯·»§»»°»ÁµÂÈ·ÆËºÇÊ¸ÊÇ»ËÌ½ÎË·ÊÈ·ÌÌ»ÊÈ¶ÌÊ¸ÍÌ»ÍÉ»ËÌ½ÏÌ»ËÊ¸ÎÊ¸ÍÍ¸ËÎ»ÎË¼ÌÌºÊÌ»ÍÊ»ÏË¸ÌÌºÐÌ¼ÍÉ»ÎË¸ÍÌºÌÌ»ÍÊ¹ÌÈºÌÊ·ËË»ÎË·ÌÌ·ÉÊ¸ÎÌºÌÈ»ÌÇ·ÌÈ¹ÌÉ¹ÎÈ¸ÊÊ¹ÌÈ¹ÌÈ»ËÈ¹ÌÇ¶ÊÆ¶ÌË¹ÌÈ·ËÉ¸ÌÌ¼ÎÈ¼ÏÈ¸ÈÈºÍÊºËÌ¹ÌÌ¹ÊÈ¸ÊÈ·ÌÊ·ËÊ¸ÊË»ÌË¸ÍÈ·ÌÊ·ÍÉ¶ÌÇ¸ÌÈ¹ËÌ¶ÉÊ¶ÊÊ·ÊÈ¸ÊÊ¸ÌÆ·ÊÄºÌÈ·ËÃ»ÊÆ·ËÅºÊÇ¸ÊÇ¶ÊÈ¸ÈÃ·ÉÈµÊÇµÉÆ¸ÊÉ¹ÈÇ²ÉÆ·ÉÃ¸ÈÇµÉÆ¶ÊÆ¹ËÈ´ÉÇ¸ÊÆ·ÇÆ³ÉÄµÈÄµÉÃ´ÇÇµÉÄµÈÅµÊÅµÉÅµÈÆ³ÇÈ³ÈÃµÇÇ´ÉÃ³ÆÁ³ÉÆ´ÆÃ³ÅÅ·ÆÃ³ÅÄ²ÆÃ³ÅÃ°ËÃ°ÃÁ³ÈÃ´ÆÁ³ÈÁµÆÃ´ÈÂ³ÆÃ±ÄÀ®ÄÁ²ÅÀ°Ä¾µÅÃ³ÄÀ³Æ¿²ÄÃ²ÄÂ±ÃÂ±ÆÀ³ÃÁ°Ä¿°ÃÁ±ÈÀ²ÅÁ±Ä¿®ÅÀ²ÄÁ±Á¾°ÃÁ²ÁÁ²Ã¿³ÄÀ°ÃÁ¯Ã¾²ÃÁ±ÄÁ³Â¾¯ÄÂ®ÃÀ°Ã¾³ÂÀ±ÄÁ¯Â¾°Ã¾¯Ã»°ÄÀ¯Ã¾¯ÁÀ²¾¾±Ã½«À¼¯Â¾¬Ã»²Ã¿±Á»®Á¾­Ã»³Â¾¬Á¼¬À½±¾¾­¾¾­Â¾«ÁÁ¬Ä»±Â¼²À»­¾¼®Á½®ÂÀ¬Â¾°Â»­¿¹ª½¾±À¹¬¾¼®¾½©½½¯¾»®¿¹«¾º¯Á»¬¿¹¬À½­Áº®¾»ª½»¬À½«¼»®¾»®À»¬¾»¬Á»«¿»°À½®¾¼±Âº¬À»¬½½­¾»­¿¼©¾»­½º¬¾º­½»¬¼»«¾»¬¿º«¾·«¾º­¾»®½¹­¼¸¦½»ª¼¸¬¾¸ª¼¹«»º«¾»¬º¸¬¸·«¼·ª½º«¼¹«¾³¬¸¸ª½µª»·¤º·§»¸«ºº©¹µ©¹¶©¹¶«¾¶©¹¶«¹·¬¸·§»¶§¸·©¸µ§¸¸¨»³©¸µ§¸¶¥´·¬½­£°³¨º³¤·¶¥··©º·¥º´©·´¥·´¥¶µ¥·´¨¹´§·´¦µ¶¦¹³©··©¸´©¶µ¥º¶§»·§¹´¤º³§º¸«¹µ¦¹´«¹µ¤·¸¨º·¨¸´¥¸·©º·ª¹¹©»·ª¹·©·¸ª¹º¨»·¬»·¬»¹©º·§ºº©¹·¨¹¹®¸·®¾¹¨¸¸¨º¸«¼¹¬¹¸«¸·¨¼»ª»·ª»¸¬»»¬¾¹­¾»­»¹«»ºª¾·¬»¼­»»¬½»¬¾¼¬¾º¬»º¬¼½­»º©½¹®¾½®¼¼¬¾»¬¾»®¿¼«¼·¬¿»¬¾ºª¾¾­¾»­½»³¾»¯¿¸­½¾¬Â»­¾¾®½½®½¾®À¼¬¿¼¯Á½°À¾®Á¼¬¾¾¬¾¾²¿¿¯Á¾°À¼°Á½®ÁÀ²À¿°Â¾¯Ã¼¯ÁÀ°Â¾´Á¿­Áº±¾½±À¾°Á¿²Á»°Ã¾±ÁÁ¯Á¿°Å¾¯À¼°Â½°Â½´ÂÀ®¿Á²ÂÀ­Â¿±ÁÁ°Á¿®ÅÁ³ÂÀ³ÁÀ¯ÃÀ°ÄÃ´ÃÀ®Ã¿³ÃÁ¶ÁÁ³Æ¾³ÂÂ³ÃÁµÆÁ³ÆÀ²Ã¾³ÆÃ³ÆÅ´ÄÂ³ÅÂ²ÁÆ¯ÅÂ³ÈÃ³ÆÆ´ÆÂ³ÇÁ²ÇÁ³ÇÀ·ÅÆ³ÇÆ³ÃÃ³ÅÅ³ÅÆ¶ÆÃµÆÄµÃÃ¶ÅÂµÅÆ¶ÆÁ¯ÆÆ¶ÆÅ¶ÈÄ·ÅÂ³ÃÂ´ÄÃ³ÉÆ°ÆÆ¶ÈÃ¶ÅÂ·ÉÅ¶ÈÃµÈÅ³ÇÃµÅÄ°ÅÅ´ÄÃ¶ÆÃµÇÃ¹ÇÃ³ÈÆµÆÅ´ÉÆ¸ÄÃ¶ÈÇ¸ÆÆ¶ÊÆµÇÆ·ÈÄ·ÆÄ¸ÅÅ·ÊÆ¶ÇÆ·ÈÈ·ÇÇ¸ÊÆµÉÈ¶ÌÈ·ÈÈ¸ËÆ·ÈÈ·ÆÉ·ÆÆ¹ËÈ¸ÈÈ·ÈÇ¹ÅÆ·ÊÈ¶ÇÈ·ÊÆ·ÊÊ¹ÊÈ·ËÇ¶ÊÇ·ÈÊ¸ËÊ¹ÌÆºÌÊ·ÊÊ·ËÉ¹ÊÉ¹ÈÈ·ÇË½ÊË·ÈÈ·ÌÊ¶ÇÉ·ÊÈ¹ÊÈ·ÈÊ¹ÉÊ¹ÉÉºÊÈ¹ÊÉ·ÌÊ»ÉÈ¹ÊÊ¶ÈÈ¹ÉÇ¸ÊÈ·ÊÆ»ÍÈ»ÉÈ¼ÌÈ·ËÇºÈË¹ÉÈ»ÉÈ»ÆÇ¸ÆÊ¼ËÌºÊÇ·ÊÈ¹ÈÇµÉÅ³ÇÃ·ÆÆ´ÅÆ¶ÆÈ·ÃÈ±ÄÄ²ÃÁ¯¿Ä¬ÀÂ®»»¬»¹¤±³¬¤¤|~{ruwtwtoxo~fdzuizbxb{wbxn[{q_zubwu_xu[tn]wlWtf[tn`nlduo_rlUnd[nbSofSldWnkWln]qfWkbUqfSkdQlfSkf[kbYnbSnbUkdUlbWoi[idUkgYll]lkUnb[odWngSonUro_ol]uq]wqdxrbxwb|uk{ud|~©¤¬£ {|tuuo|kxr||i~~d{n~nltixftfwtf{uf~wn{w §¥§³ª«¸ª³»´»Æ¼ÀÊ¼ÄÍÀÊÎ¿ÈÐ¿ÌÐ¾ËÐÁËÒ½ÍÎ¹ÎÈ½ËÐ¾ÍÌ¿ÏÏ¾ÐÍ¾ÎÐ¿ÑÐÀÎÎ»ÊÐ»ÐÐÂÎÑÁÎÑÀÐÍ½ÐÐ¾ÎÏÁÐÎÀÎÍ½ÎÐ¾ÐÎÁÑÊ»ÍÎ»ÌÍ¿ÍÎ¿ÍÐÁÏÎ¾ÎÍ»ÍÐ¿ÌÎÁÍÍ»ÎÌ¼ÊÌ½ÐÎÁÎÎ¿ËÐ½ÐÎ½ÌÎÁÍË»ÌÐÀÌÏ»ÌÎ½ÌÈºÍÎ¾ÊÒ¼ÌÌ¼ÎÍ¿ÎË¾ÎË¾ÐÐ¸ÎÊ¾ÎÏ¼ÌË»ÊÌ»ÍÍ¼ÌÌÀÎÑ»ÌÌ¼ÊÍ¼ÐÍºÏÎÁÌÌ»ËÌ¹ÊÍ»ÍÍ¿ËÌ¼ÍÌ¿ÍÎ»ÌÌ»ÊË»ÌÊ»ËÊ¾ËÍ»ÌÊ»ËÍºÌË¼ÊÉ»ÌÊºÉÌ»ÊÍ¼ÌË½ÈÈºËÊ½ÊË½ÈÊ»ÊÌ¼ÈÊ»ÊÏ½ÈÉ¾ÌË¼ÌËºÈÊ»ÌÊ»ÊÇ¹ÈÈ¸ÉÉ¼ÊÌ»ÈÊºÈÊ»ÉÊ¹ÈÌºÉÉ¹ÊÊ»ÆË½ËÇ»ÈÊ»ÊÆ·ÆÇ¹ÈÈ»ÇÈ·ÅÇ·ÅÆ·ÃÈ¶ÆÃ·ÈÇ¸ÇÈ¼ÈÆ·ÆÆ´ÆÅ¸ÈÆºÅÆ·ÈÃ³ÆÇ¹ÄÃ¹ÆÈ¸ÈÆ·ÂÃ¶ÈÆµÅÅºÆÅ¶ÆÄ¶ÈÁ·ÄÅ³ÄÄµÇÃ¸ÄÃµÃÄ·ÇÂ·ÅÄ³ÃÆ¶ÆÆ´ÄÅ¶ÃÁµÈÄ·ÃÃ´ÆÂµÂÅµÆÅ·ÃÃ¶ÃÀ³ÅÄ´ÆÂ·ÃÄµÃÁµÃÁµÂÄ´ÅÁ¶ÃÂµÂÁ¶ÄÅ³ÂÄ³ÃÀ¹ÆÂ¶ÄÃ±ÆÀ¶ÄÆ¶ÁÁ²ÁÂ³ÃÁµÁ¿³ÄÁ³ÃÀ´ÁÀ³Â¿´ÃÂ¯ÂÁµÁÄ¶ÁÁ¯ÁÁ³ÃÃ²ÁÁ³Ã¿±ÁÀµÃÃ³Ã¿³ÂÀ³Á¾±¿Á³Á¿³Ã¾³Á¾³ÂÀ³ÂÀ³ÃÀ³Â»°ÁÁµÄÁ´À¾­ÀÀ¯ÁÀ¯À¾³¿¾´ÁÁ²ÁÁ³ÁÁ±ÃÀ³Â¾²ÂÁ±ÁÀ±À¾±¿¾²¾¾¯À¿¬Á¿³À¿³À¾°Á¿³Á¼®¿¾³¾¿²À¾³¿¼¬¼¾³Á¼®Á»²»½¯½¼®½À¯¾½­¾»¯»½°»¾°»½°À¾­¾»®»¼¯¼¼®Á½­»»¯¼»³½»¯»º°¾»°»»ª¼¾®»¼«¼º°¿»¬»¹°½»¬½¹¬»º¬»¸°ºº­»¹¬»»­¸»®¼»®¼©¬±²¬¢·±¢µ²¤´¯£¸³¦¶±¡·²¡¶­·°µ°¡·²£·²¢¶±¤µ´¢¸°¡·³£·³¢¶° °³¢µ­£¶°¸°¡·³£¸³¡¹°¡³±£·²¤·²¢·®¡·³¤·³ ¶´¢¸±£¹²¢·°¥»´¤¹±·³¥·±¢¹´£·³£·µ¦º³¤¹³¤·±§¸°¥»±£¸²¥¸¶¤»·£¸¶¥»±£»¶©¸·¦»¶¨¾´§¸´¨»´ª¾·ª»³¨¹µ¥»²¦½¶§»¶¦½³¥»·¤º³¦»´¥»·¨»¸©»·¨¾µ£ºµ¦»·§À¸¨»¸§¾·©»»¦¼·§½¸¨¾¶©»»©¾º«À»«½¹§À»ª¿»«¿»©À·®Á»«½¹¨¾¸§¾¸¬¾·¬½¸¬¾¸§¾½«¿»ªÀ·«¾¼ª¿»¬À»©¿º§¾¸ª¾º«Á»¬ÀºªÀ¸©½»¨Àº¬¿¸©À»©Á¹¬Ãº¬¾¼¬Ä»¬À¹¬À»©À½©Á»¬¾¼ª¾¿©Àº¬Á»¬Á¼¯Á¼¬Â¼¬Ã¼«Äº¬Á½°Â¾¬Ã¼­Ã½¬Æ¼¬ÁÀ¬Å»®½»¬Ã¾«Ã»¬ÅÁ¬Å¿®Â¾®Ä¾®ÆÁ¬Ã¾°Ä¾±ÃÀ¬Á¿«Ã¾¯Â¿¨ÆÀ®Ä»°ÃÀ­ÃÂ²Å¿°Ç½°ÂÀ«ÆÄ²Æ¾±ÆÁ´Ä¿³Æ¾°ÆÁ²Ä¾°ÄÀ±ÃÀ®ÃÁ³ÆÂ°ÅÀ®ÂÁ¯Æ¾³ÆÂ°ÅÁ³ÆÁ¯ÆÂ±ÃÀ¯ÁÀ®ÄÂ±ÆÂ¯ÆÃµÆÀ³ÄÄ³Å¾±ÆÁ°ÆÁ³ÇÄ²ÃÁ¯ÇÃ®ÆÄ±ÉÅ²ÅÃ±ÈÀ²ÆÀ±ÅÁ¯ÅÆ¶ÊÁ°ÇÁ²ÆÁ³ÄÃ±ÇÃ²ÇÁ°ÆÆ¶ÄÅ²ÈÂ³ÇÁ²ÇÁ¶ÈÄ²ÈÃ³ÆÅ±ÇÆ´ÇÃ³ÇÄ²ÆÄ´ÇÄµÈÄµÊÄ³ÆÃµÆÇ·ÆÄ·ÇÄ´ÉÆ³ÈÆ³ÈÂµÈÄ²ÅÆ²ÈÄµÈÄ¶ËÄ´ÈÃ³ÊÃ´ÇÇ·ÊÆµÊÅ³ÈÁ´ÇÆ´ÆÂ²ÊÄ´ÉÈ²ÆÅ¶ÈÇ´ÆÃ³ÆÆ·ÈÇ¶ËÆµÉÄµÊÄ·ÆÄ·ÇÆ°ÆÃ²ÈÆ¶ÊÄµÆÂ°ÅÃ¬ÅÁ²ÃÀ®ÃÆ²Â¿²ÂÂ°ÁÁ«¾»«¼¹¬º·¦³³°¢§|x|~ll~l|g{i|ifwgzb{k|i|fdtd~qb{qdzq]{r]xrUwnUwi[ukWwl]uqYtiWldStdQk_OlYMl_SibSi]SlYKg]Ik]Mi[Mi[Sg`Ml]Qk`OlbOi`Qn_Ok]OlYIiYOfYMgSOfUMg_Ol[Qk`Oo`Qi_Ul`Mn]OlbOofSqgUldYubSzn_xr_zt`|i[~ut§ztotqzkr~tztlknrd|odxk`ul`{k[rg[ub`qlUzgUtf[ufUzdYzi]~rku £¡£³¬¶¾²¸Á·¿Æ¹ÃÊ¸ÊÈ»ÈÊ¸ÌÉ¹ÉËºÌÈ·ÊÈ·ÌÉºËÌ¸ÍË½ÎÊ»ÎÊ»ÍÊ¸ÌÊ»ÌÌ»ÐË¹ËÌºÈÌ¿ÎÊ¾ËË»ÌÈ»ÌÌ»ÎÊºÊÌ¹ËÍ»ÎÎºËÊ»ÌÈ·ÊÈ»ÌÊ·ÎË¸ÊÇºÊÉ¹ÌÊ·ÌÈµÌË¹ÌÊ¼ÌÈ»ÉË»ÊÆ»ËÌ¸ÍÊ¼ÊÊ¹ÍÊ·ÊÊ·ÎÈ¹ÉÇ·ÌÉ¹ÊÊ¹ÍÉ¸ËÉ·ÊÉºÌÊ»ÊÊ·ÌÈ¹ÌÉ·ËÊ»ËË·ÌÉ¸ÎÈ·ÉÉ¸ËÆ»ÎÌ»ÍÊ»ÊÆ»ÌÈºÈÈ·ÌÅ»ÉÉ»ËÇ¶ÊÊ·ËÆµËÇ¸ÉÆ¸ÇÆµÌÇ·ÈÈºÊÉ·ÊÈ¹ÊÅºÈÇµÆÈ¸ÉÄµÇÅ¶ÆÈ´ÈÆ·ÆÉ·ÈÆ·ËÅµÊÉ¶ÇÈ»ËÆ·ÊÆ¶ÈÈ¸ÉÊ¸ÊÆ·ÈÆ¸ÈÆ·ÈÄ¶ÊÇ¶ÊÇ¹ÈÆµÉÄºÈÆ¸ÌÄ·ÈÄ¶ÆÃµÇÃµÇÅ¶ÇÃ³ÈÃ°ÅÆ¸ÈÃµÇÆ±ÇÀ´ÉÀ³ÃÄ°ÃÃ¶ÆÃ¶ÆÁ³ÈÄ·ÅÁ³ÆÁ±ÄÅ³ÆÁ·ÆÁ°ÁÀ²ÆÁµÄÃ³Ä¿³ÅÂ²Æ¿²ÄÁ±Ã¿®ÅÃ°ÄÁ°ÁÁ°Ã¿³ÃÃ²Ã¾³ÄÃ²Ä¿³ÆÁ²Ã¼³ÃÀ´ÃÁ³ÅÀ°Ä¿°ÃÃ´ÃÁ²Ã¾³Ã¾²ÄÁµÂ¿°Á½°Ã¿¯ÁÀ²Â½®Ã¼®Ã¿¯ÃÁ®Ã½±À»¬Á¾°Á½°Æ½®Á¾²Á½­ÃÀ­Á¾²Ä»°Á½®Á»±ÂÀ¯Á½®Ãº¬¿¿°Â¿°Á»±Á¾±À½±Á¾²¾¾­Ã½¯Á¾²Â¼®Á»²Á»¬½»¯Â½®Á»­Á¾¬À½²Ã¾®Á¾°Á¹¬¿»¯½»­¾¸®½½­Á½­Ã¾­¾¸­Á»®À¾­¾»¯¾¼±¿¹­¾½¯Á»¬¾»­¾ºª¿»®¾»­¼¸«¾¹¯¾¹­À¼¬¾»®½·ª½¸­¾¸¬½¹®¾»¬½¸«½¹®¾¹¬»·¨¾¶¬¼¸«¾¸¬¼¶§»·¬»»ª»¸¬¼¹¬º¸«¾¸®»·ª¼¶«»·¦¹µ©¹·«»¸¨ºº«º¸ªº¸©º·­¸¶«»·§»¸¥ºµª»·«º³©¹¸©ºµª¸µ¦·¸«½µ«»·¥¸·«¹­¤³³§·³¤¸µ¦¹µ¦·³¨··©º¶¥·³¦¶³§¸µ¦»²¨·³§¸¶ª¶µ«¶¶©»µ¥¸µª··¥·µ§·µ¤»µª¶·©¸·¨··§¹·§¹·¤¸¶§»µ¥¹·§·´¨º¹©»º¦»·ª»¸©º· ··¬¼·¨»·ª··«·µ¨¼»ª¼·ª»´¬·¹ª¸·§º¹«»¸¨¾·¦¼¹¬¿¸¨½·¬·¼ª¼¸¬¹»­¾¹¨»º¬¼¹ª»»«¾¹¬»»¦»»®»¸¬À¼¬½º¬»»®ºº¨½¼«¾¹¬»¼¬¼¾®¾»¬¼»¬¿ºª½¼¬¿¾¬½½«¼»­Áº¬»»¬¼¼«Á»¬Á½¬¿¾®Â¼®Á¾¬À¾¯Á½®¾¼²¾¾®¿½³À»­À¾®Á¾¬Á¾²À¿¯½½¬Ã¼®Á¿±¼À¯Ã¾°À¾­Å½²¿À®Á»®¿¿®¿¾²Ã¾­¿¼­ÁÁ®Â¿°Á¿°Æ½¯ÁÀ¯¿¿²Â¼¬Á¼®Å¾­À¾¯Â½¬ÃÃ²Ã¾±Á¾­ÂÀ®ÅÁ¶ÃÁ±À¿³ÁÂ³ÃÀ²ÅÅ¯ÆÃ²Ã½°ÁÂ³ÃÀ²ÃÁ³ÄÂ±ÁÂ°Æ¿³ÇÃ²ÆÁ´ÇÁ³ÁÀ³ÁÃµÃÂ³ÄÄ³ÅÁµÄÁµÄÂ¯ÃÃ±ÃÆ´ÆÂµÈÃ±ÆÁ³ÃÁ³ÃÄ³ÃÃ¶ÇÄ¶ÅÄ´ÆÂµÈÅµÃÁ°ÆÅ¶ÈÁ³ÄÃ¶ÇÄ°ÆÁ¸ÃÄ´ÆÁ±ÆÂ´ÈÆ³ÇÆ¶ÆÅ¹ÈÆ¶ÆÆ³ÈÅ·ÅÃµÇÃ¸ÉÃ´ÉÆµÈÅ·ÈÇ¶ÊÃ³ÈÆ·ÈÃ®ÅÃµÄÈ³ÇÈ¸ÉÅ³ÃÈ·ÇÈ·ÆÇ¶ÈÌ·ÉÄ¹ÈÄ¶ÉÆ¸ÊÆµÇÈ·ÆÅ·ÈÇ¸ÇÇ·ÌÆ³ÆÈ»ÇÊ¸ÈÈ´ÊÅ·ÆÉ¸ÍÈ³ÈÇ´ÉÉ·ÈÈ·ÈÇ·ÉÇ¹ÇÇ¹ÇÉµÊÇ¹ÊÇ¸ÈÈºÉÊ»ÌÆ»ÊÉµÈÊ¶ÊÊ¼ÊÊ¸ÈÉ¹ÈÆ¸ÊÊ·ÇÅ¸ÊÉ¸ÆÈ·ÊÉ»ÌÊºËÊ·ÊÈ¸ÈË¼ÉÈ·ÊÆ³ÉÈ·ËÈ¶ÌÆ¸ÌÇ¶ÉÆ·ÊÈ·ÆÆ·ÇÇ·ÈÇ·ËÇ¶ÉÆ¸ÈÆ¶ÈÅ¶ÈÆµÈÆ¹ÈÌ¾ÊÈ¹ÊÆ¶ÃÆ³ÈÈ³ÄÁ²ÃÂ³ÂÄ³ÂÃ³ÁÀ°¼»¬·¶©³­¬ ¢£ wzwon~o|k{ig~ilol{k|qwi{uf|{ixd{zd{r`xodwl]tbYrf[od`lg[nd]qf[qiWofWndUi]Si[Sk]Sk]Yk_Wk_OliWii[kfYl`Ui`Yk_SofYifUidWkbUidSl]Uf[UlbQg][li[on[qf]nfUogUnkWniSnd]oo]oi`qxbuxo{l{zf~{qx|ttwo~lq|{q{uwt{wiwrbwogwnbzn`ri`ul_tnUwl`un_rn]zi_wn_wufuxf{zn||u§¢²©ª¾²·Âµ»Æ·ÂÌ»ÆÌ¾ÊÍÀÏÐ¾ÌÍºËÌ½ÎËÁÊÒ¾ÐÎÁÐÐ¾ÌÎ¿ÏÏ¾ÐÐÀÑÐÁÎÎ¾ÍÎ¼ÍÍÀÎÍÁÏÓ¾ÌÍ½ÒÏ¿ÐÎ»ÎÍ¿ÎÎ¼ÎÌ¼ÐÎ¿ÏÌ½ÐË¾ÎÎ»ÎÒÀÏÍ¿ÏÎ¼ÐÎ¿ÌÌ¾ÎÒ»ÎÍ¾ÎÍ¹ÎÐ¾ÐÍ¿ÒÍ¼ÌÍ»ÌÍ¾ÐÌ¾ÊÊ¼ÌÐ¿ÌÍ¹ÏË¿ÎÌºÌÌ½ÌÊ¾ÏÏ½ÎÍ»ÌÌ½ÎÍ¾ÍÌ»ÏÌºÌÌ»ÉÍ¾ÍÍ¾ÌÎ»ÎÌ½ÌÐ¾ÎÍÀËÊ¾ÎÎ½ÌÎºÌÌ¾ÌÌ¾ÎÌ»ÌÎ¾ÌÊ½ÊË½ÎÊ¼ËÍºËÊºÉÉºÌÌ¸ÊÈ¹ÊÈ¾ÌË¼ÊÈ»ËÆ»ÊÎ½ËÊ·ÉÊ»ÈÊ½ÊÊ»ÎË¼ÊË»ËÌ½ÊÊºÊÊ¹ÊÊ»ÊÌ½ÌÊ»ÊË¶ÊÊ¼ÈÌ»ÈÊ»ÈÊ¼ÊÈ¾ÆÇ»ËÈ»ÉÉ»ÉÅ»ÈÇ»ÇÆ¼ÊÉ·ÉÆ·ÆÈ´ÇÈ»ÈÅ¸ÉÈ¹ÆÃ·ÊÅ·ÇÆ¸ÇÅºÈÇ»ÈÃ¸ÈÊ¸ÃÆ¸ÆÆ¶ÇÈ·ÅÈ´ÊÇ´ÇÆ·ÅÆ¸ÈÆµÆÅ¸ÈÈ·ÆÅ¸ÆÆ³ÄÂ¹ÉÇ´ÈÅ·ÆÆµÆÅ·ÇÁ·ÅÅ·ÇÆ³ÇÃ·ÆÆ¶ÇÅ·ÆÂ³ÅÃµÁÂ±ÅÀ³ÁÆ¶ÃÃ´ÄÂ³ÂÄ¶ÈÁ·ÆÆ¶ÃÄµÆÃ´ÅÂ³Á¾¶ÂÆµÄÃ´ÄÂ³Á¿µÅÁµÁÄ³ÂÂ´ÃÃµÂÃ·ÃÄ´ÅÃ³ÃÃ³ÄÁ´ÂÁ³Ã¿²ÅÁ²ÁÁ¯ÄÂ³ÁÀµÁÁ´ÃÃ±ÁÁµÄ¿³ÂÃ´Á¾²ÂÂ³ÄÁµÁÀ´ÁÁµÁÀ³Ã¿²¾¿µÁ¾²ÁÀ²¿¾³ÁÂ³ÀÁ±À¾°ÃÀ°Á½³ÁÂ³ÂÀ·ÁÀ²ÃÀ±À¿µ¿À²Á¾´¿Á¯¿¾¶ÁÁ³¾¿°Â¾°ÀÁ²ÀÀ±½¾³¿»²½¿²¿½°Â¿²¾¾²½À±ÁÀ¯¿¼°¾½°¿¾±À¿³¿¿¯»½³¾¾°Á¾¬¾½®¼º­¿½®¾¾²¾¼°Á¼®½¿¯¿º±¿»®À¾¯¼»¯»½­¾¼­»»«»»®¿»°¼·®¼ºªº»¯¿½¯¹»±½»¬¾»ª»º¯½·¯½»¬¾»°½¼¬¼µªºº«º¹ª¹¸¬¹º¬»©¯°¢µ¯¡µ°¡´±£´°·±¡·±¡¸®¡µ±µ³¡·±£µ±¤·°·³¤·²£¶­£·®¡º°·²£¸¯¢´¯¢¶±¸³£·³¢µ³ ¸«±´¢»³ ¹² ·³¢¹³£¹³¤·²¢·¶£µ³¡·²¤¸³¤¸°¡¶³¦·¶§¸µ©»³¤·° ¸³¤º²¤»³§·µ¥»µ¥ºµ¦¹µ£ºµ¥»·§¸¶¨»²£¸·¥»µ¨º³¥¸´¦º´©·´§»µ¦ºµ¤»¶¦º¶¤¸µ§¸´©»·©¼µ¤»²¦½¹¨º¸§½¸§¾µ§½¸¬»¶ª¼·©»º§¾·ª¾¸®¼·©º·©¾º§¾»«½º«Á·¬Á»ªÀ»¬À»©Á»©Àº«Á¸¬¾º¬À»§¾¸«¾¸«Â¸©¿¸©½¸ªÀº¬¾¹©¾¹¬¾»ªÀ»«¾º©¾¸«¾¸¬À»ª¾¾«¾»«À¸¦¾»­Á»¬Âº«À»ª¿»¬¿»¬Á»«Á¸ª¾»¬Á»¬¿¼«Á¼¬Ã»¬Á¼«Â¹®Á½¨À»¯Á»¯Ã¾«Á½¬Á½¬Â»¬Ä¾°Â¼¬Ã¼¬Å¿°Ã¾®Ã¾±ÂÀ­Á½®Å¼¬¿¿¬Á¾®Â¾¯ÅÁ®Ã¾¬Ã»¯Ä»¬Ã¾²Ä¾¯ÃÀ°Ä¿°ÆÀ°Ã¾¯ÆÀ¯ÄÀ²ÇÀ¬Å¾®ÃÂ°ÄÀ±Ã¾¯ÃÁ³ÄÁ°ÃÁ°Æ½¯ÆÃ®Ä»®Ã¿°Æ¾¯ÆÁ³ÁÁ±ÆÀ¬Ç¿°ÆÁ¯ÄÁµÆÁ¯ÄÁ°Æ¿±ÄÂ²ÄÁ°Ç¾³ÅÃ²ÇÁ°ÄÃ³ÆÁ²ÈÃ¬ÃÁ´ÄÁ³ÆÃ²ÆÁµÃÄ³ÊÄ³ÊÁ±ÆÀ°ÇÃ³ÆÅ²ÉÃ³ÈÄ³ËÄ²ÉÃµÊÃµÆÃ²ÆÁ²ÊÅ±ÈÃµÆÃ²ÅÅ²ÈÃ²ÇÄ°ÇÇ²ÈÃ´ÈÃµÉÁµÆÅ²ÈÄ²ÉÅ·ÇÃ²ÇÆ²ÆÃ´ÌÆµÆÁ´ÆÄ³ÊÅ³ÇÃ²ÈÀ³ÇÄ°ÈÃ´ÇÁ³ÆÃ³ÈÅ³ÆÇ·ÈÄ²ÊÃ´ÈÂµÇÅ³ÈÁ°ÆÃ±Æ¾±ÅÆ²ÆÁ³ÊÁ±ÉÅ®ÄÆ±ÅÄ¯ÉÃ³ÆÄ±ÆÃ°ÆÁ²ÇÃ²ÇÄµÆÄ·ÆÃ²ÄÁ¬Ã¾¬ÂÁ¯ÁÁ«ÁÀ¬Á¹©··§·¯£±­«©©~z||zq{f|fz`ud|du_z]r`wg|ii{g~x`~w]zq]zo[uq_xr]rgWufUq`Qi[Ql_KoWFrWMn[Dl`MkUSi_KibMi]OnYMgWIkQKiYMiWFiWOkYIgWMgUKkYIlUKbWOgWMiYOgYMgbQk[OgYOgWIgWIgUKdSQkdQkgSl[Qn]Oo[Ik_Qk`MndWrgUodYtl`tldto[zodz{q{q{kud~wi~qzkub~ug{ufnd|t`|u_~ug|tg~rg~r_zq`xfYtdQrbQqYUqgYofQr_QtbQn`OrdUtgWuk_zqbwn_{n`~zq ©£©·©·Á®¹¾µ½Ä¹ÃÇ·ÃÊ¸ÆÊ¸ËÊ·ÊÉ¸ÊÌ»ÊÈ¹ÍÌ»ÍÈºÌÌ½ÌÈ¹ÌÉ»ÌÎ»ÍÎ»ËË¹ÌÌ¸ËÊºÌÌ½ÎËºÌÊ»ÍÊ½ËÎ¼ÏË¹ËÊ¹ÌÈ»ÌÈ»ÌÍ»ÊÉ¸ÌÇ¹ÌËºÍÊ¹ÌÊ¸ÌÌ¹ÉÌ»ËÊ¹ËÊ»ÊÌ·ÌÊ¹ËÉ·ÊÈ·ÌÊ»ËÌºËÊºÍÊ·ÊÊµÌÌ»ÌÈ·ÌÊ·ÌÊ¸ÊÆ»ÌÉºÉÈ¸ËÈµÉÊ»ËÅ»ÈÇµËÆºÌÈ·ÊÇ¹ÊÈ¹ÊÇ·ÊÈ·ÊÆ¹ÈÌ·ÎÆµÇÈ¹ÊÈºÉÅ»ÌÈ·ÊÌ¸ÊÈ¹ÊÇ¹ÇÈ¶ÆÊ·ÊÇ·ÉÆ·ÊÇµÊÇ·ÆÅ¶ËÈ´ÉÃµÉÄ¸ÈÇ´ÇÇ·ÌÅ¸ÉÉ´ÈÆ¹ÈÆµÊÇ´ÇÄ¶ÆÆµÌÆ´ÊÆ¹ÊÄ´ÇÅ¶ÈÇ¶ÈÄµÈÄ·ÈÅ·ÇÆ¶ÅÄ·ÈÇ·ÇÅ·ÊÄµÆÃ±ÃÄ·ÈÃ°ÈÃ³ÇÃ°ÆÄ³ÌÃ´ÆÃ°ÃÁ¯ÆÅ¶ÃÄ³ÄÄ°ÇÃ±ÆÃ²ÅÁ¯ÉÃ¯Â¾´ÃÃ°ÅÃ°Æ¾³ÃÁ²ÆÂ±ÇÁ´ÊÃ²È½°ÃÂ³ÅÂ²Â¾´ÅÁ¯ÆÂµÃÀ°Ã¿±ÄÁ°ÃÂ²Á¾°Ã½´Ã¾¬ÅÁ²ÄÁ¯Ç¾¶Æ½±ÅÀ²ÆÁ¯ÁÁ³Ã¿³Á½³Ã¾¬ÂÁ°Ä¿²Á¾±Ã»°Ã¿±Ã¾°Ä¾°Á¿®Ä¾®¿»®ÀÁ°Æ¾°Â»²Á¿®¿À²Ã¾¯Æ¾¯À»¯Á¾­Â»±Á»°¾¿°À¾®Â½²Á»±À¼¬À¾®Â»­Â¾¬Á»³Â½­¾¾°½½­Á¼®¿½¬»½¬Ã½±¿¼©¿½­À»®¾¼­Á¾®¾»¬Á¾¯¿¾¯Áº¬¾½±¾»ª¾»¬Á¼¬¿½°¾»«¾¼¯¾»ª¾½¬¾¸¬À¹®»¹¬¼»¯Â¹¬¿·¬½¹«¾º­»¸¬¾»«¾»¬¼½­½¹«¿º¬¾º¬½»¬¾»¬»»ª»¹ª¾º¯¼µ§¼»¨½¹©½º«½º«»·­»º©¼·¬¾·«»·ª»¸ª»¹ª»·§»µ¨»¶«»·§¸¸ª¼´©º¶©»¶«·¶©º¶ª¹·¨·¶§º·©¹µ§»µ§¹³©»´ªº´£¹µª¸´©·­¦±³¨·³¤·¶¨·³¤·¸§¸·«··¤¸·§·µ«¸´¥º¶«·¶¦¹´¦¸¸§·´¨´·©ºµ§··©·³¥¸·©µ¸¨··ª¸·¥¸¶¬»¹¨º¹«»³§¹·¦»µ§¹·¦º¶©º¶ª··§¼¸¨»¶¨»·§¸·©¹·ª¹¸¬¹¹«¹¹¬¹º§»µ«¼·©¹¶¬¼»­¹µ©»¸ªº·ª»¹ª»¶ªº¸©·»©¿·ªº¸®»³ª½º­½¼¬¼º¬ºº¬¼·¬¾¾¬¾·¬¼»«½¹¯½º¬»ºª»¹«»»«Àº¬¼º¨½¹¬¾º¬¿½®¼¹±¾·¨¼¾­¾¼¬Á¾­Á¼¬¿¹¯Á½°À¿­À¸°Á¾°À¿«Á¿®Á¾°¿¿®Á½°¿¼¬¿»°¾¾¯Â¼­¿¿°¿¾®¾¾¯Á¾­Ã¾¯À¾°Â½¯À¾°Á¾±Á¾²Á¾¯Á¿®À½®Á¿¯Á¿°Ä¿¯À¿¯Ã¾±¿¿¬ÃÁ²Ã¿®Ã¿®ÃÀ­Á¿±ÃÁ±ÂÀ²ÁÁ´ÃÀ³Ä¾¯ÁÁ±ÁÁ³Ã¿°¿À±ÂÁ·ÂÁ­ÁÃ³ÃÂµÄÁ´ÄÃ³ÆÃ³ÃÁ³ÄÁ³ÄÁ´ÈÁ³ÈÅ³ÃÀ³ÄÃ³ÃÃ±ÄÂ³ÇÂ³ÃÂ·ÇÁ´ÄÂ±ÆÀ¶ÈÆ³ÆÃ³ÆÁ±ÆÃ³ÆÆµÄÅ³ÈÂ³ÅÄ´ÆÃ´ÅÅ´ÅÄ´ÅÂ¶ÃÅ³ÄÃµÅÃ³ÄÁ´ÆÅ³ÆÈ·ÊÃ³ÇÃµÆÅ·ÇÆ³ÅÆ³ÆÅ³ÆÅµÉÆ¶ÆÂ¶ÆÆ²ÆÅ³ÊÈ·ÈÆ¶ÅÅ´ÉÄ¹ÆÈ´ÊÆ´ÃÆ¶ÆÇ·ÇÇ´ÆÇ¶ÈÈ´ÆÆ³ÆÆ·ÇÈºËÆµÇÉºÈÆ·ÊÇ¶ÇÇ¸ÈÇ»ÊÆ¶ÈÆ·ÈÉ»ÊÊ¶ÈÆ¹ÈÆ¶ÊÈ·ÆÇ¶ÉÆ¶ÇÉ·ÅÇ´ÇÆ»ËÇ¼ÈÇ·ÈÆ»ËÆ·ÈÊºÆÆ¹ÊÇºÈÈ³ËÇ¹ÇÆ¶ÊÈ·ÍÍ»ÊÈ¶ÌÇ¶ÊÇ·ÊË¶ÊÈ¹ÈÈ·ÈÆºÊÉ´ÈÊ¹ÈË¹ÌÆ¹ÈÈ»ËÊºËÈ·ÊÈ·ÈÉ¹ÈÈ¹ÊÈ·ÇÆ¸ÈÇ·ÈÈ¹ÊÈ¾ÇÊµÊÊºÉÈ¸ÈÄ·ÈÇ¶ÆÊºÆÈ¸ÆÈ¶ÅÆ·ÆÂ¶ÄÄ³ÀÁ¶ÂÁ¶¾¿¬º·ª´±¡®¥¬¬¢¥{u|{unrniizi|finot~o|k{|g{{fx|`wrbwobuoWwk]ngWogSniSn_WobSlgQkgQl`Sk`Qg`[g_UidSi`SndUlfWl`Sk`UrdYk]Uk`Ul[Qi`OddYk_Uk`Ok[YgdWkbUibWkbYibWk`Sk`Wi_Ylf]id[l_UlgOkbYibUng[nkYod_nq`no`uobtufwxqx{uqzxgwudwof{xf{wg{tfzxl{xk~ug{xg{|k~xd{tiwqi{xfxugugbrn]tkYod_oobwqdri[xi`qg[kd`qn]rn_tqgwqbxk_uq`~ul~¬¥¥º²¯½³µÅ·½È¹ÂÉ»ÆË»ÈÍ»ÌÎ¾ÌÑ½ÌÎ¾ÏÒÁÐÑÁÐÎÀÌÐ¼ÍÐ¾ÐÒÀÏÐÁÑÌÀÍÎÀÍÎ¼ÍÎÁÎÌ¿ÎÒ»ÌÐ¿ÎÐÀÑÍ½ËÒÀÏÎ¿ÎÎ¿ÌÏ¿ÎÐ½ÎÒ¿ÎÌ¼ÍÌÀÎÐ¾ÌÑÀÑÎ½ÍÌÀÍÎÀÌÎ¾ÍÎ¾ÌÎ»ÊÍ¼ÎÌ¿ÎÎ¾ÎË¾ÍÍ½ÎÎ¿ÌÎ¾ËÍ¾ÍÌ¼ÌÏ¿ÎÌ¼ÎÍ¼ÏÌ¼ÌÌ»ÈÌ¿ËÍ»ÎÍ¼ÌÍÀËÍ½ÉË¿ÐÊºÍÌ¿ÎÍ¼ÍËºÎÎ»ÌÎ½ÊÉ¼ÎÎ¼ÊË¼ÌÌ¾ÍÉ¼ÉÌ¼ÊÉ½ÌË¼ÈÌÀÌÇ¼ËÉ»ÉÌ»ÈÈ»ÉÊ»ÉÊ»ÌÇ»ËË»ÈÊ¸ÉÌ¾ÌÍ½ÊÊºÊÊ½ÉÉºÊË¼ÈÊ¹ËË½ÊË»ÈÊ»ËË¹ËÇ¹ÈÊ¼ÈÊ¼ËÊºËË¸ÇÉ»ÊÈºËÆ»ÅÈ»ÊÈ¸ÆÈ³ÆÆ¹ÈÅ¹ÈÆ¸ÉÈ·ÈÅ·ÇÈ¸ÈÊºÊÈ·ÆÇ¶ÊÅ·ÆÈµÆÅ¶ÇÆ·ÉÅ¶ÇÈµÈÅ¹ÆÃ¶ÆÈ³ÇÆ¹ÃÄºÆÇ¸ÊÄºÆÄ·ÅÅ¸ÆÆ·ÆÃµÈÄ¹ÆÆ¶ÆÃ·ÆÂ¶ÆÅµÁÄµÈÃ·ÈÃ´ÂÃ¶ÈÆ·ÇÁ·ÃÅ¶ÆÃµÃÃµÆÃ·ÅÆµÄÆ³ÃÁ·Ä¾¶ÅÅ´ÁÁµÃÁ¶ÅÁ·ÅÁ¶ÁÅ¶ÃÃµÅÁ³ÂÃ´ÄÁ³ÃÁ´ÀÁ´Å¿´ÃÂ¶ÃÃ´ÁÁµÂÃ³ÄÃ¶ÅÃ´ÃÁ´ÀÁ´ÃÀ²ÁÃµ¿Â³ÂÁ³ÅÄ´ÁÂ³ÃÂ±¾Â³¿Ã³ÀÃ´ÄÁ·Ä¾±Â¾´ÂÅ³ÂÁ³¿¾°ÂÃ´ÁÀ°ÁÀ¯¿¾±À¿³ÂÁ³»À±¿¾¯ÀÁ³¾À¶ÁÁ°ÂÀ³ÂÀ´ÁÀ³ÄÁ³ÀÀ³ÁÁ³¿¿³¿Á²Â½°¿À´¿À´¾¼³¿¾²Á¾®ÁÁ°Â¾¯¾¼²À¿²Á¿¯Á¾±¾½­ÀÁ³Àºµ¾»°Á»¯¾¼¯¿¾³¿¼±¼¹°¼¼²À¾®¼»®½º²»»®»»°½º±¼½«½½¯»»¬¼¸°»»¬¼»±½½¯¼¹¬¼»¯¿»³¼º¯¾»¬¹¹­»¾®¾»¬º·®¼º­ºº«¾¹¬¹»«»º®¼¹®¼¸¬½º³·«°¬¢²®¢³°£µ°£¶²¡²²·³£·®¤µ°£·® ²² ´°£³°¹°¡µ²¡µ³·®¡³³¡·°¢·°¤´³£¶±¡µ³£·²¡·³¢¶³¢·°¡µ³¡¶°¡·±¶´¦¸³£¸³·³¤·³£¹±¤·²£µ°£¸´£º³¡·²¡¹´¤¹¶£¸¶§º³¦¹³¥»³£·³ ¹´¦¸±¥º´©»·§»µ¤¹³¦º³¢¹³¦¹²©¼³¥·´¥¹·¦º·£»·¨¸·§¾¹¦½µ§»³¢¸·©»´©¹´¢»³¥º·§¼µ«º²©½µ©½¸¨Áµªº¶ª»´¦¾·§½»¦»·¦½µ«½»«¾·¨»µ¨Á¸©¾º§Áº®¾º§À¹«½·¦À¸¨½º¨¼¹¬¿»¬½»«¾¸«¾¹«À½«¾»ª»º¬Á»ª¾»ª¾·«¾¶¬À·¦¼»©¼¼«¼¹¬½·«À»«»»¬½»«¿º¨Á»¬Ã·«Á¹ª¾»¬¿¼«½»¬¿»©¿º­¾¾­Áº¬À¸©À¾®À»¬Á½¬¿¾¬Á»«Á¼°Á¾«Á»«ÁÁ°¿»¯Á¾¬Â¾­ÁÀ¬Ã¾®Á½¬Ã¿®Á½°Ã¿­ÄÀ®Ã½°À¾ªÁ¾¯Á¿®Ã¾­Ä½³ÃÀ°Ã¿®ÃÀ°ÃÀ³Æ¿°ÁÀ°Ä¼¬Ã¾°Â½²ÄÁ­Ä½±Æ¿­ÁÁ®Æ¾¬Ä¿®Á¿¯Ä¾¯ÈÂ²ÃÀ¯ÃÁ®ÂÁ±Ä¿²ÅÄ¯ÃÀ«Æ¿®ÃÀ±ÃÂ³ÃÁ®ÆÁ²ÃÃ®Æ¾±ÃÂ³ÄÁ²ÇÁ±ÃÀ°ÆÁ³ÇÃ³Æ¿µÇÁ®ÆÃ²ÈÄµÆÁµÉÄ¯ÇÂ³ÇÄ³ÂÄ³ÇÄ·ÇÁ³ÇÁ³ÆÃ³ÇÁ°ÅÁ²ÇÁ²ÇÁ²ÉÃ´ÆÂµÆÃ³ÆÄµÊÁ³Ã¿°ÅÃ°ÈÃ³ÆÄ³ÇÁµÆÃ³ÈÅ²ÈÂ°ÅÃ²ÄÃ´ÈÄ·ÇÆµÇÄ³ÈÃ²ÇÆ´ÊÆµÈÁ±ÈÃ±ÄÆ³ÄÃ¯ÅÁ®ÅÄ´ÆÄ³ÈÃ²ÉÃ²ÅÃ²ÄÂ³ÇÁ´Æ¾²ÆÆ­ÃÃ³ÆÁ±ÃÁ²ÆÁ³ÈÃ®ÃÃ²ÄÁ²ÁÆ²ÄÁ³ÅÀ±ÃÁ°ÁÀ±Ã¼¬¾¾¯¾À°¼¾ª»½¨·±¡¬¨¥~wuqtz|zro~idzdzfti{gngdx`{wk{x`wqdzk_tiYrgYqg]qdSo_Oi`Oq`OkbQo]Ok[On[KgYIkUIkUInYKgYIkWDo`Ik[FgQIgUMgYMgYMgfSliQodOnYMdWKgSKgQOfYIiYMdSFfQOfYIbYQdUMdSIiSKfYKgWKi_MgYMi[Mk]MkYMl]Kg]QnYOg`Ol]OqdQn_SndSqf[tl_xk[ul]qgSodWodUtl]tn]wr`wt`wl_zf`uq`un]tk_xnbuodwk]wi_wf]tlYrdSqd[qfUr_YqfYobQr`So]Sq]Mg_Ql_So_Sq`WolW{qdztg¬ ª³¬±·¬ºÁ°ÀÃ³ÁÄ·ÃÅ¶ÆÈ¹ÈË»ÊÌ»ÉÊ¸ÍË»ÊÎ»ÌÊ¸ÉÊ¼ÌÈ¸ÊÊ¸ÉÉºËÉºÊÌ»ÊÆ»ËÉºÎÉ»ÊÊ¸ÍÇ¹ÍÊ¶ÌÊ¸ÉË½ÌÊ¹ÎÊ¹ÌÈµÌË¼ÎÈ·ÊÈºÌÆ½ÌÌ¼ÍÊ¹ÊË»ÌË·ÌÇ½ÍÇºÊË¼ÌÉºÊÊ·ÌËºÎÇ¸ÈÅ·ËÇ¸ÈÇ¹ÎÉµÌÉºËÈ·ÈÈºËÆ·ËÈ·ÉÈ¶ËÈºËÉ»ÈÈ¹ËÊ»ÌÈ¹ÉÇµÊÉºÊÈ¸ÊÉ¸ËÇ¶ÈÈ·ÉÈ¸ÉÆºÉÈ·ÇÁ¸ÈÆ·ÌÅ·ÈÈ·ÊÆ·ÉÈ·ÊÆ¶ÈÄ¹ÇÈ·ÇÇ·ÈÇ¸ÇÆµÊÆ¶ÆÅ¸ÊÄµÊÆ·ÉÇµÆÄ»ÉÃ·ÈÄ³ÈÆµÈÄ·ÄÆ·ÆÆºÊÆ·ÈÉ·ÈÈ¶ÆÅ·ÆÅ¸ÊÆ¶ÆÄ¸ÆÃ·ÇÅ³ÇÃ·ÇÄ³ÈÄµÈ¿°ÅÄ²ÅÁ²ÆÁ´ÇÃ´ÄÀ³ÆÃ´ÅÂ´ÅÁ³ÁÂ´ÆÃ²ÃÂ²ÄÁ³ÆÂ°ÅÃ´ÄÁµÅÀ²Ã¾´ÁÁ±ÇÀ´ÃÃ³ÉÀµÆÁ²ÄÀµÇ¾´ÃÂ±ÅÁ®ÃÀ²ÃÂ±ÄÀ²Ä¿²Ä¾±ÁÁ°ÃÃ³Ä¿±ÁÁ³Ã¾²ÄÁ³Æ¿°ÄÁ³Á¿®ÃÃ­ÃÀ®Ã¾±Ã¾³ÅÀ­Á¾®Á¿°Á»®Â¾°ÃÁ³Á¾®¾¿®À½®¿¾«¾Á±Ã½®ÂÁ°Á¾±Á¾­¿¾¯Á¿°Á½±À¿®Á¼®À½¯Ã¼±¾¿¯Á¼®Á¾®Á½¬Á¼¬Á¼¬Á¾¬Á½°¾¾°Â¾¯À¼®Á½®¿¼¬¼»¬Á¼¬Â¼®¼¸°¿º¬Á½±Á»®Á¹¬Ã¸®º½±Á¾¬¾»­¿º­¿»¬Á½®¿»¯À¼­À¾®»»¬¾º¯À¹­¾º«¾¸¬½¼¬¿·®¼·®½¹¬»º¬Á¸­À¸¬¾»©½¸¬»¹¬¼·¬¸¹¯¾µ¬¼¼¬»¸ª¾·«»¸«¾·ª»»­º·ª¼º¬»º©¹¸¬¾¶­»¶«»·«»´ª»¸¬½¶«º¹ª··©»¶©»¸©¼³¨»¶ª»´©º¶©»º¨º·©¹´ª¹µ©½·«»·©»µ¦»´¦·µ©¸·ª·´¦¹µ¬¸·¦¸¹¨º®¤±³§µ·¦´´¥·³§¹µ§¶µ¦¹´§·´¤´·¨µ¶¦¸¹¥¶³¥»µ§·´¦´´¨µ³«¹¶©¶¸§º·§¸²¦·¶¨··©»¶¨¹³¦»·©¹¸«»´§·´§¸·ª»¸©º¸¥´·¨µ·«»¸¬¸¶©¶¸ªº·ª¼»©»¹¨»»¬··ªº»©¹µ¨·¹©¹·¬¼º¬¹¶©º·©º¹§¼¸­¹¹¬¼¸©º¹ª»»§¼º¬»¼¬º»¬¼½«»µª·»­¼º©¾¸¬º·¬»»¬½ºª¼»¬»¿ª¾¹­»º¬¼»¬¾»¬»»¬½º¬Á½¬»¼­¼½¯À¿®½¼­½¾ª¿½­¼»­¾¼¬À¼«½¿®½¾¯Á¾¯¾¾®Á½°Á¿¯¿À®¿¾¯¿¼°¾¾¯¿¿±ÂÁ¬¾¾¬À»®¿¿²¿¾¯Ã¼®ÁÀ³ÀÁ³Â¼¬¿¼¯ÁÁ®¾¾®ÂÀ°Â¿°À¾¯ÂÀ±ÁÀ®¼¾¯¿½²ÀÃ°Æ¿®Ã¿²Á¿°Ã¾±ÂÂ³Ã¿±ÂÂ®¾Á³Â¿°Á¾°Â¾®Ã¾²ÁÀ¯ÃÁ²ÁÁ²ÃÃ±ÃÁ°ÄÂ³ÁÃ¯ÃÂ³ÃÁ³Á¿²Ä¿³ÈÆ´ÅÂ´ÁÁ±ÃÃ´ÀÂµÃÂ³ÅÁ³ÃÄ³ÅÄ°ÆÆ³ÃÄ³ÈÃ±ÅÅ¸ÆÃ¶ÅÃµÄÇµÃÃ¹ÆÅ·ÂÃ³Ä¿³ÃÅµÆÂµÃÇ²ÆÆ³ÅÂ²ÄÄµÃÄ±ÂÃµÄÆµÅÆ´ÇÄ¶ÅÆ±ÆÃ¸ÆÆ¹ÅÆ´ÆÈ³ÅÄ¸ÈÅ³ÅÄ³ÆÆ´ÇÅ¹ÆÃ²ÆÅ´ÆÆ¶ÇÅ¸ÆÆ·ÈÄ¶ÄÅ´ÅÊµÊÈµÆÆ¹ÅÆµÅÈ³ÈÈºÊÅ¹ÆÉµÊÇ¸ËÇ·ÆÉ·ÇÈ·ÊÆ»ÆÈ·ÈÆµÈÇµÆÆ·ÈÆ·ÄÇ¶ÈÆ¹ÇÄ¸ÈÈ¶ÈÈ¸ÈÆµÉÆ»ÈÉ¶ÉÇµÊÊ·ÉÈ¶ÉÈµÌÈ¹ÆÉºÅÊµÊÇ·ÈÆ¸ÆÈ·ËÊºÈÆ¶ÆÊ·ÈÈ»ËÈµÊÊ¶ÉÆ¶ÆÌºËÊºÌÊ·ÅË¹ÈÇ¹ÆÊ·ÇÇ·ÇÇ³ÆÅ³ÅÃµÇÅ´ÃÃ´ÅÅ³ÈÄµÃÂµÆÅ³ÃÅ²ÈÀ´ÁÂ³¿À³Â¾¯½¿¯ÀÁ²ÀÂ°¾¾°¼½°··¬³¯¦©¬¦tkwwz||xtnlnnnqwzt|o{tbttdwt]unbuo]lnWtk]tlYqiYrg[obSodYoi]nn]rk]ri[qfWlk[ofSiiYqkWtnUofWo_Sl`Qlb[qb[kdUkf`qlbnd]kb[kdQldQi_UkbUibUgbWg]Ug]Sf[Ui_Si]UibSgfWf`[kbWb`YkfUndUi`YidQdfSk_Wkf[kf]lgWnd]lgUng`qnbli_qldll`ql_rk]or`xwirzlrxdro[ul]tldttdqo`uwitugizzdxuixwftrdtnbuq]wt`{qdwo[rl_tf_okWldSobYog]nl[qrdxwixxbzugzr¨£¨¹¯²¿¶¼Ç³ÁÈ¹ÆÈ¸ÆÊ»ÆÊ¾ÌÍ¾ÌÎ¾ÌÏ¾ÍÎ¾ÌÒ¾ÎÏ½ËÎ¼ÌÐÁÊÌ¾ÎÏ¿ÍÑ¿ÍÌÀÌÐÀÐÐ½ÐÐ»ÌÊ»ÍÍ¾ÎÎ½ÎÍ¾ÍÊ½ÎÌ¿ÊÐÂÌÐ¼ÌÌ¾ÌÐÁÎÎÁÐÎ¾ÎÎ½ÍÐ½ÊÎÁÊÎÁÐË¾ÌÎ¾ÊÌÁÎÐ½ÌË»ÍÌÀËÌ½ÌÍ»ËÌ»ÊÍ»ËÑ½ÌÍ»ÌÎ¾ÊÈ¾ÌÏÁÌÊ»ÌÊ¼ËÊ½ÍÍ¾ÉÊºÌÌ¿ÌÍºÌÍ¼ÊÉ¹ÊÌ¾ÌÎ»ÌÍ¾ÊÊ¾ËË½ÈË¼ÊË¿ÌË¹ËÌºÇÊ¼ÈÊºÌÈ·ÉÌ¼ÊÇ¸ÊÈ¹ÈÉ¼ÌË»ÈÌºÉÍ»ËÉ½ÊË»ÈËºÊÇ¾ÊÍ¼ÊÌ¹ÆË¾ÊÊ¼ÇÈ»ÊÇ»ÊÊ¼ÊÍ½ÉÉ¼ÌÊ¸ÈÈ¹ÊÊ½ÈÌºÇÌ¹ÆÊ¼ÉÊ¼ÈÉºÆÊ»ÆÈ¸ÊÇºÆÊ¹ÇÆ¹ÇÊ·ÊÈ¹ÈÊ¹ÈÇ¸ÆÈµÊÊ¼ÈÅ·ÇÈ·ÅÉ·ÈÅ¹ÈÆ³ÆÈ·ÇÆ»ÇÇºÅÅ¹ÅÇ·ÈÆµÃÆ·ÆÈ·ÉÃµÇÆ·ÈÈ·ÈÃ¶ÆÃ´ÂÄ·ÃÆ·ÇÃ·ÃÄ¸ÅÂ³ÃÆ¶ÅÃ³ÃÂ´ÃÆ¶ÈÃ´ÁÇ¹ÆÄ¶ÆÁ¶ÅÂ·ÆÆ´ÆÃ·ÃÃ·ÆÅ·ÃÅ·ÂÅ´ÆÃ²Ä¾µÃÄ´ÃÀ´ÂÂ³ÂÄ´ÃÂ²ÄÂ´ÂÂ´Ã¾¶ÁÁµÁÁ¶ÁÁ¶ÂÆ¶ÄÂ·ÂÂ·ÁÃµÀÂµÁÀ³ÄÀ¶ÁÂ´ÀÀ´¿¾³ÀÃ³ÄÀ°ÀÁ´ÂÀ±ÀÃ³ÁÂ´ÆÁ³¿Á´Á¾³ÀÁµÁÀ³Á¾µ¿¾±¿Ã·¿Á³ÁÂ³Â¿³ÀÀ³ÄÁ³¾¿³¾À³¿Â³¾Á³Á¿µÃÀ´¿¾³¿Ã´ÃÀ´¾¾°¾Á³À¿°Á¿°¹½±¾¿±¿¿³¾¼±¿¾²¾Á®Á½¯½½°¿¾²½¾±¿Á³¿¼°½»³À¾¯¾»°¾½¬¿»®½¾³¾¿³¿½¯¼»®¼¿­¼½¯¼¼¯¾¼®¾¸³À½¬½»®»½´¼»°¹»®¹º¯»»²¼¼±»¼²»½¯¼»¯»»¯»¼¯º¼®¹»¯¸º¬º»¯¸»®»¼¯½»®º»²¾»®·¹©½½®»¹­½º¯¼¤¯­¡´°¤µ±¡³°¢µ¯¦³±¡´° ·®£³²´®£³±·±³® µ­¡¶® ¶²¸¯¢·²·±¡µ°£º°£·±¥·±¡¸²¤·³¢·°£·³¡µ¯¡µ®·°£³³µ¶¡µ²¡¶°¢³²£¹°£¸²¢¹³£¶²¢·³£¸²§·³¥¼³¦º°¡¹²¤»´¥¸µ¥¸±¤ºµ¤¹µ£¸³¤¸µ¦¸³¤¶²§¹·¨»µ¡¹·£»±£ºµ¨ºµ§½¶¥»·¦¸µ¦»µ§»µ£ºµ§»·§ºµ¤»´§»´¥¹µ¨»·¦ºµ§»·¨º·¦¾·ª¾¸§¾¸¨º¶ª¾»«»·¦»³©½¸«¾¸§½·©½·§¾·§½¹©¾¸ª¿¸§¾µª½¹©¾¶©¾´¬¼·«¿»ª¼»§¾µ§À»ªÁº©¼¹ª¿»«¾»§¿·«¿º«À»«¾»¬¾·«¾º¦½»«»º©Á¸«¾»§Á·¨¿»«Â¸¨¿»ª¾ºªÁ»¬¿»¯Ã½¬¾·¬Ã»©¾¹§Ã»«¾»¬Á»«Â»¬Á½­Â»¬Á¾¬Ã¼°¾»«Ã¼¯Ã»®ÁÀ¬Ã¼¬Ä¿«Á¾­Á»«Á¼°Á½«Á½°Ã»³ÄÀ®Ãº¯Â½¯Ã¿¬Á»®Ã»®Ä¾­Ã¿¯Å½¯ÃÁ¬ÁÀ°Æ¾®ÁÁ°Èº®ÄÁ¯ÅÁ®Ã»­Á¿®ÃÁ±Å¾°ÆÁ°ÄÂ¯ÁÁ²Ç¾°Â¾¯ÁÁ²ÇÄ®ÅÀ²ÆÀ°ÁÁ®ÅÁ±Ä¿®À¾®Ä¾®ÆÁ³ÆÁ³ÄÃ´ÃÃ³ÇÁ²Å¾³ÅÁ°ÅÀ²ÇÃ³ÆÁ±ÅÂ³Ä¿³ÄÁ°ÆÃ³ÅÁ²ÆÁ±ÄÃ°ÇÄ²ÊÁµÆÁ³ÆÁ²ÇÅ²ÅÃ°ÄÁ°ÇÁ¯ÆÀ³ÆÂ³Ä¿²ÆÃ·ÆÂ³ÆÄ°ÆÁ°ÅÃ°ÈÃ´ÆÃµÆÁ²ÈÆ¯ÈÃ±ÈÆ³ÈÀ±ÆÆ³ÆÁ³ÇÆ²ÈÅ±ÅÃ´ÈÃ³ÆÅ²ÈÁ³ÆÅ°ÈÃ±ÅÄ´ÇÃ¶ÆÄ²ÈÅ·ÉÂ²ÊÅ²ÅÆ²ÈÃµÇÃ²ÆÁ°ÇÂ®ÃÀ®ÃÀ¬Ã¾¬Â¾¬Ã¿¬Ä½¬Á¿©Â¿¨¿»©¾·¡»·¢¸¶¦¸³¡µ² ®ª¬¢¢q|d~biltxrrlwfzfzdzd|knkroxdud~nYxoWzlUqfYnbOudQniOt]UqbQo`Ql_Mn`Mn]KlYIo_SnbUlbUolUnqYrbOu]OtbMq`WobQn_Oo_Kn_Ml]InbUkUIidMk[OiYOk]Og_OgWKiYIgWIkYSf[Od]IgYIgUDgUK`YFgQIi]OfYMfWKfSIf_QlUIi[OgYKdYKkWKgYKg]MgUQkWKfYOk_Qn]MnYQk_Ol_Mn_QlgQngUld]qgYrgWrfUrdWqgWndWqd_qkYtdbtk`tq]ti`zl`ut]wn[{o`wl[wg[wlYtnWwlYr]So`Ko]Ul`OtWOnbUnfSrfYtdWti_{qi±§°·®¶Á°¾Ã·ÃÈ´ÆÊ·ÈÈ·ÉÇ¸ÈË¹ÊÊ¹ËÊºÈÈºÊÈ¹ÉÆ·ÌÈ·ÌÊºÊÊ»ËÉ¸ÉÇ¹ÊÇ¸ÌÈ»ÎÉ½ÎÊ¸ÌÌ¹ÊÊ»ÍÊ¸ËÇ¹ÌË¹ÌÊ·ÈÊºËÈ·ÌÈºËÆ¹ÌÇ¸ÍÈ¹ÊÈºÊÊºÈÉ»ÌÉ·ÈÈ·ÊÇ»ÈÈ·ÊÈ¸ÉÆ·ÉÆ¶ÊÈµÉÇºÍÈ¹ÈÉ·ÌÈ·ÊÈ·ÉÇ·ÉÈ¹ÌÈ¸ÊÊ·ÈÇ¶ÉÊ¸ÍÆµÈÄ¸ÊÃ¹ÈÆ¸ÉÈ¹ÌÄºÊÊ¸ÈÄ·ÊÇµÉÈ·ÈÆ·ËÈ³ÍÅ·ÈÇµÇÃµÈÇ·ÉÅ·ÈÅ¸ÉÆ·ÈÆ³ÇÆ·ÊÂ³ÆÆ·ÈÄ¶ÈÃ¸ÈÇµÅÈµÆÃ³ÈÃ¶ÇÇ·ÈÆ¶ÊÄµÈÄ¶ÆÆ´ÄÄµÇÄ·ÆÃ¶ÇÂ·ÇÃµÇÆ¶ÆÁµÅÅ³ÅÃ·ÆÄ³ÈÃµÄÁ´ÆÃ²ÄÄ³ÆÄ¶ÅÃ·ÇÁ´ÄÃ·ÄÆ³ÆÀ³ÄÃ³Ç¾²ÆÁ¶ÆÃ³ÁÁ³ÇÃ²ÆÁµÃÃ±ÉÄ³ÅÃ¸ÄÁ´ÅÁ¯ÄÂ²ÅÁ±Å¿¯ÃÁ²ÄÁ²ÃÁµÆÀ²ÆÀ³ÄÀ³ÈÁ²ÃÁ³Â½¯ÄÁ°ÁÁ³ÄÀ±ÁÀ­ÂÁ°Â¾²ÃÀ°ÄÁ¯Ã¾²ÃÁ´Á¾¯ÃÁ±ÃÀ®Ã½±Â¿²Ã¾¬À¿¯Ã½°¿¾±Á½­À¾±Á½°Á½¬¾½¬À½¬ÃÀ¬½½®À»²¾½¬Á¿²Ä¹²Á¼®Á»®Á¿°Â»­Àº²Á¾®Â¾²¾¼¬À½°À¹¬À¾¯À¼¬¾»­À¹¬½½°¾¹­¾½®¾º­½¾®Á¿°Àº®Á¸®¾»®Á¼«½»®»º«¼¾²¾¹®½»®¾¸­¾»­¾»®¾¼¬À¹¬½¼­Àº«½»©»¸«À¾¬¾º¬¾º©½·«¼¾­½¹«º·¨»·«»»°»¶©¼·¬½¸¬¿º«»¶§½¸ª½¶ª¼·¬Á»«¼·©º·®»¶ª»¹«»¸¬¼·§º¸©»·«½¸¬¹·ª»·¦»¸©¼¶§¾¶¨º·¬¹·ª»·¨¼µ¬»µ«»´©º·ª»·«¸·«»·ª¾¶¦»µ«¸¶«»·©··§»¶ª¹·©¸¶©º³©¹µ§»µ§¸¬¤­´¨·µ¤´³§·µ§³´¥²·©··¤·µ¨¹¶¤¶·¨·³¦¸±¨·´©¶³¦¶´¤³´§¹µ©¸·©º·§¹³¤··¥·µ§··¨µµ¥¹¸©·¶¨¸³¨·µ¦··¥º¸ª¸·§·µ¨¹¹¦·¹¨º´§¸¶¥µ¹¦¸¹¨·¶¨·¹§¹¹¬»·ª¼·¬¹¹¬¸¼¬»»¬»·¨··«¼¶¨»º«»ºª¹º§¸»®»º¬»ºª»¹ª»¹¨¾º¬¼¹ª»ºª¾¹«¾»¬½»¬»º­¼¿ª»»¬»¼¬¾¸«¸º¬»¾ª¿¹­¼»ª½¼®¿¾¬¾º¬¾¸¯¾»ª¾»«»º©¼¹ª¾»¬¿¾®Á¾®¾¾­¿À¬À¾®¿½­¿½­Á¾­½¾°Á½®À¾®½¾®»»²¼¿°¾À°¾¾®Á¾°ÁÀ¯Á¾°Á¾±Ã¿®½¼­À¿®Á¿¯Á½±Á½®¿¾°¿½¯ÂÁ±À¿¯Â¿®ÁÁ²ÄÁ®ÃÀ³À¾¯Á¿³ÁÀ¬Â¿±Â¾²ÁÁ±ÀÁ²Á¿³À¼ªÁÁ®¿À²ÄÀ°ÁÂ®ÁÃ²ÃÁ±ÄÀ°ÄÃ°ÃÅ±ÆÁµÃ¿±ÂÁ³ÂÃ³ÃÁ´ÃÂ°ÃÄ³ÂÃ³ÆÁ¶ÆÂ´ÄÃ´ÅÂ´ÇÃ³ÄÃ±ÅÃ³ÃÅ´ÅÁ³ÇÅ³ÂÆµÈÆ¶ÃÄ³ÃÅ·ÈÃ²ÅÆµÇÂ³ÃÃ·ÄÃ³ÅÁµÅÆ´ÇÄ³ÃÁ´ÈÃ±ÈÅ¶ÊÆµÉÃ¶ÄÆ³ÁÅ·ÈÅ´ÄÅ·ÈÃµÈÇµÆÆµÇÄ¶ÇÈ·ÇÅ³ÅÃ³ÆÄ³ÆÆ¸ÈÅ¸ÈÉ¶ÃÆµÈÇ¶ÅÄ·ÊÆµÈÅ¶ÃÆµÉÈ¶ÇÃ¶ÉÆ¶ÊÆ¶ÆÈ¶ÈÇ·ÈÆ·ÈÉºÆÈ´ÇÇ·ÇÄ»ÊÈ³ÈÇ¹ÊÆµÆÄµÆËºÇÆ·ÊÈºÈÆ·ÈÆ¶ÇÈ¼ÉÆ·ÊÈ´ÈÊ´ÇÆ¹ÉÇ·ÆÈ¹ÇÆ·ÈË¸ÊÉ¶ÇÅ¹ÊÉµËÊ¶ÊÆ¶ÊÈ¸ÉÊºÃÊ»ËÆ·ÉÊ·ÈÊ¹ÉÈ¹ÊÊ·ÉÊ·ÊÊ¹ÊÊ¹ÈÇºÇÉ¹ÇÈ¶ÇÈ´ÈÉ³ÇÈ´ÅÈ·ÈÇ²ÆÃ¯ÂÃ´ÃÁ³ÁÃ³ÂÁ¬¿º¬»À©½¾¨¼»¨ºÁ¥¶± ¬¬¦¢xonqz|~xrnng|tktxuowl~{b~t_zt`wt`xkYqd[obYrk[oo]ut[wlWui[qoUoqYoq]wo[wu`wo[ti_ri]qnfro[qn_uq[rubtzdl{_uz`xu[on_lf[ogSkk]kkYnk[nn]ioWnkWliQgd[igYldWiiWfk[l`Qi]SgbQk]Sid[ifUibSi]SkiUkbUkdUfdYkfWfbQi`UnbSkbWd_Ql]WgdUl`UfdYkfYoiWlgYnnUrl[kb]oiWtk`nd`rlWko`rgYni[nq[qo_zubxwbttg{nzq~wlxznz~k{wizo`uobzqfwnbuo[ug]qiYwf[ofWlf[oiWoq_qifwrb|wg£¡±©¬½±¸Ã¶ÀÈ»ÁËÀÉÍ¼ÉÍ·ÌÊ¼ÊÊ¾ÎÎ»ËÊ¿ÌÌ»ÌÌ¸ÎÑ¼ËË¾ÏÎ¾ÎÏ¼ÌÌ¼ÍÎÀÌÊ¹ÎÌ½ÌÍ¾ÌÐ¿ÎÎ¿ÌÌ»ÌÍ½ÌÑ¾ËÍºÎÍ»ÌÍ½ÎÌ»ÊÎ¼ÌÎ¼ÍÊ¾ÊÎ¿ËÍ¼ËÌ¾ÎÐ¼ÌÌÁÎÌ¼ÌÏ¾ÌËºÍË»ÌÌ¼ÍÍ¹ÊÐ¼ÌÌ¿ÌÊ¼ÊÌ½ÌÎ»ÌÐ»ÊÌ¼ÊÊ½ÉÐ¹ËÊ½ÊÍ¼ËË»ÊÌ¼ÉÎ¾ÊÊ½ÊÌ»ÊÈ½ÌÌ¿ÊÊ»ËÊ¹ÊÍ»ÊÊ¼ÌÍ¹ÌÊ»ÈÊ¸ÊË¹ËËºÊÈ¹ÈËºÇÉºËÊ¸ÊÉ»ÌË·ÅÉ»ËÈ»ÌÊ¹ÈË»ÉÌ½ÈÇºÌÊ»ÊÈ»ÊÌ¼ÊÌ¼ÈÇ¸ÉÉ·ÊÊ»ÊÈºÅÈ¸ÊËºÈÊ¹ÊËºÊÊ¹ÈÌ¹ÈÇ»ËÊ¹ÈÆºÆÈ·ÇÉºÈÇ·ÆÈ¶ÇÆ»ÆÈºÈÇºÈÊ·ÈÈ¹ÇÉ¹ÆÆ·ÉÈ·ÈÆ¸ÃÈ·ÈÆºÈÆ¸ÆÆ·ÊÈ·ÅÆ´ÇÂºÆÆ¹ÈÆ·ÄÅ·ÅÆ·ÆÃ¼ÅÅ·ÈÆ¹ÆÃ´ÃÃµÆÆ·ÆÃ´ÀÃ¶ÆÅ·ÅÆ¶ÅÅ¶ÅÂ·ÅÅ¶ÈÅ¶ÅÃµÆÇµÆÃ³ÃÅ·ÃÆ³ÂÆµÄÆ¶ÇÂ·ÃÃ´ÂÁ¶ÄÃµÄÃ·ÆÅµÄÃ´ÅÃ¯ÃÀ¸ÂÁ³ÄÃµÃÃ¶ÂÂ²ÁÁ´ÂÀ²ÃÃ¶ÅÂ´ÃÃ³Ã¾³ÃÃ³ÁÃ³ÃÁ³Ã¿­¿Á³¿¿³ÃÂ³ÀÂ²ÃÃ´ÁÁ´ÃÀ®¾Á³ÃÂ´Á¾³¿À±¾¿¯ÁÁ³Á½²ÂÀ³ÁÃ±ÀÃ´ÂÁ³Á¿²ÁÂ°¾¼³ÁÁ²ÀÁµ¿À±½À³ÁÃ´ÂÃ³À¿¯¿¾³ÁÁ²Á¿±À¿³À¾¯¾½³À½²À¿³Á¿´Â¼²ÁÁ±¿¾³¾¿±¼¾°¾¾­¾¾±¾¾³¿º°ÀÀ¬¾½¯¼½®¾»°¾¾®¾½®¼»±¼½®½¾³¼¿®½»³¾¾¯¾»³¾¾±¼¾±¾¿­¿»¬º»¯¼»®¼»°½¸­¼¼¯¼»¬¼»¯¼»­¼»°¾º­º»°ºº²¾»®»»¬¹»¬º¼¬º¼®½»ª¼¸¬»¾­¼¹¬»»¯¸¹­½¼®¼¬¬¬ µ­µ°¢´®¡·±¡´±µ´£µ±¤µ°¡²®£·°¡¶°´®³­¤·³´®¦´¯·¬³°£µ°¸°¡´°¢·±£·±¥¸¯¡µ°¡¶®¡·° ¸³ µ°¢·¯¢¸µ¢µ°·²¢¶²£·²¡·³ ·µ¢µ´¦º±¤¹µ¥·µ¤µ´£·´¥¹±¥¹²¥·µ¢¸±¢·´§¸²¥·´¦¸¶¥¹²¡¸·¥»µ¦¸¶¦»´£·³§·³¤»¶§¹³¦»µ¤»´§»¶¦¹³¥¸·§»µ§·µ¤º·§»¶§½·§½¶¦»¶¦½¸ª»·ª»³ª»·§¾µ¥»¸ª¾º¦»¸§»¸©¾·«¾¹ª½¹©»·¨¾¸§¾·ªÁ³¬¾¹ª¾¸§»ºª½º¥½¶«¾¸ª¾¶¬»¹ª½¹©¾º©»·¨¾¸ª½¼¬¿¹¬¾¸§¾¶©Á¸ª¼»­¾¼¬¾¸¨Á·¬¾¾«¿»®¿¸«Áº¬Á»«¾»«À¼¬À¸«Â½«Á»®¾º¬¾¸ª¾»«Á»ª¾»¬¾º©Á»¬Á½«À½¯Â»®Â½­Ã»¬À»­Ã¼¬Á¾®Ã¾°Ã¾¬Â½¯Á¾¬Ä¾®Äº¬¿»¯Ä½±Ã½®ÃÀ­Â¹¬Â¼­Ä¾«Å¾¯Ã¾®Ã¾­Ã¿¬ÄÁ±Á¾°Ã½¬Á¾°ÆÀ®Æ¾­Æ¾­Ã¾­Æ»¬ÄÀ®ÁÂ°ÃÀ­Ä½¯Ã¿°ÄÁ³Æ¾°ÆÄ¯Ã¿±Å¾­ÃÀ®Ä¿­Ä¾±ÄÁ²Æ¾²ÄÃ²ÆÁ¬ÄÁ´Ä¿®ÆÁ¯ÄÁ±ÂÁ®Æ¿±ÆÁ®ÅÀ³ÄÁ³ÄÃ²ÇÁ±ÆÁ¯ÅÃ­ÅÃ³ÈÃ³ÆÁ°ÃÁ±ÃÂ°ÆÁ¯ÄÄ³ÆÃ²ÈÂ®ÈÄ²ÇÁ³ÆÃ²ÈÃ±ÈÁ²ÅÁ±ÇÄ°ÆÀ±ÅÁ°Ä¾µÅÂ²ÆÃµÈÂ´ÈÂ³ÇÅ³ÆÃ´ÇÁ´ÈÀ³ÉÂ¶ÄÃ²ÇÃ¯ÆÄ±ÄÃ´ÄÁ³ÈÄ²ÇÃ³ÆÃ´ÇÈµÆÁµÈÄ³ÇÃ°ÆÃµÊÃ±ÊÁ¯ÈÄ±ÆÃ±ÈÁ´ÆÄ¬ÃÄ´ÈÃ³ÇÁ°ÆÁ­ÆÀªÁ¾­À¾¯ÁÀ§¾»¦»¹©¼¶¤¹º¤µ³¤°®©¨¡wg{flxz{ul{dgf~bfnnxbrd|{dq_|nY{qYunQwfQw_ItYOo_OrfMtgUobYr`SqgOtiYzfStd]rfYqfUubUo`MtfQodUul[tx_zz`zo`tl`xi`rg[od[k`Uk_Oq[QgYOiUQkWSgYQdUMfWKgWIgUIgUQf]MiWIlbQdUIk]Ik[OdUIiYQgfIiYKiSK`OOfbKiYKgSMgSIdYFdYKiWOiUIgUFfSOiYKfSIgUKgYIiYKi]Kf`IgdOo`Og_OnYMlbQo`QqbQq`SobOtbQqfWlfStgYxfYtg`tndzrbz|f~ugx{dzt_zqbzo_wl]rkYtgUu[Oo[Qo[Qq]So]Qn`OofUqdYtiSzii{®¡«·©²Àµ½ÇºÂÉ·ÆÆ¸ÉÈ·ÉÄ´ÅÇ¸ÊÊ¹ÉÈºÌÈ»ËË¸ËÊ»ÊÌ¹ÌÇ¹ÎÉ¹ÌÇºËÉ¸ÌË»ÌÊºÎÈ·ÊÊ¼ÌÊ·ËÉ¸ÍÊ·ÊÌ»ÊÄ¸ËÈ»ÌÆ»ÌÇ·ÊÊ´ÇÉ»ËÊ·ÎÊ¸ÊÈ¼ÊÈ»ÊÈ·ËÈ·ÊÇ¹ËÈ·ÊÄ·ÊÊ¹ÊÆ·ËÈ¶ÊÆ´ÌÈ¸ÊÇ¸ÊÅ»ÈÊ¹ËÈ·ËÆ¹ËÆ·ÈÇ³ÈÆ¹ÊÆ·ÈÇ·ÆÇ¶ÊÈ¸ÌÆ¶ÈÈµÆÆ·ÈÇ³ÊÊµÊÄ»ÊÆ³ÈÈ·ÇÃ·ÈÄ·ÆÃ´ÇÄ·ÈÇµÈÄ´ÇÇ´ÆÇ·ÈÃµÆÃ¶ÈÃ·ÄÆ·ÆÄ·ÈÆ·ÈÈ¶ÇÇ¹ËÅµÆÆ·ÈÅ¶ÈÆ¶ÆÄ¸ÆÁ¸ÇÃ³ÉÃ·ÈÃ³ÈÁ¶ÆÃ´ÆÆ·ÈÂµÈÄµÆÃ³ÅÃ»ÊÃ³ÇÃ³ÄÁ²ÄÀ´ÇÀ±Æ¿·ÆÃ³ÆÃ°ÃÁ±ÆÁ·ÄÀ³ÄÀ³ÈÁ²ÆÁ²ÄÁµÅÃ´ÃÀ³ÄÁ²Ä¾µÆ¾³ÆÂ±ÅÁ·Ä¿±ÃÁ±Ä¾°ÂÂ´Ä¾²ÄÁ´Æ¿°ÅÀ²Ã¾°ÀÃ°ÅÃ¯ÂÁ±Ã¿³ÆÁ±Á¿³Å¾°Ã¼²ÃÂ±ÄÁ²Æ¾±Æ¾²ÃÁ±Ä¾¯Â¾³ÃÁ±Ã¼²ÃÀ®Â¾°À¾¯Á¿°Â¾®¾¾­Á»¬¾¾¯Ã½®Á¼®Á¾­À½®Á¾¬¾¼­À¾®ÅÀ¬Á½°À»¬Ã½®¿¾­Â¹¬Á½­¿»°¿¼­Â»¬Àº¬½»«Àº°À¼°¾»¯¿»­¾¼­Á¾²À¹­¿¼«¿½¬¾½ªÀ¸«¾¼«½½¯Á¹¬¾»­Áº¬¾¼°¾½¬À¹¯¾»ª¿»¬¿»«À¾±À»¬»½°¾»©¼·®½·¬¾¼®¾»®½»¯¾»±»¸®¾¹®¾º«Á¼¨¾¼­¼¶©¼¹­½º¬¹º¬¾¸«¼µ­»¹¬À»¬¼µ¬¹·¬½¸¦º»¬¾¸¬º¸¬¼·©º¶¬»·ª»¹¬»¶ª¼·¦»·«¹³©·¹¬º·¬»·«¹¶¬½·©»·©¾µ¥»µ¦¹·¬º³©º¸§»µ§»³§»µ¬»·¨¸¶­»³§··¨ºµª·µ¨»µ©µ¸«º¬¦³²¥¶¶ ´µ¨¶´¢µ·¥·¶¦··§µ´£ºµ§¶·§¸¶¥·¶¥¶µ¦µ¶§··¥¶´¦·¶¤¹¶«·ºª¸¶¢¹¶¤µ¶£¹·§¶³¤»¸¦··§º¶ª·³¥··¨·´¨ºµ§¹¶§·±¨¹¶ª·¹¦¶·¤»¶¦·µ¦¸µ§»¹­¸¹©··§»¸¤¹º«¹¶ª¹µªº·¨º¸§º·¨¸¹§»¸¨¼º©º·ªº¹ª»¹¬»»¦¹ºª¹»¯º·¨»º«¾½®»»¬»¹ªºº¬¼¹¬º¹ª½»©¼ºª½»¬»¼®¼»¬¾»®»¼¬Á»¨»»¬½»­»º¬¿»¯¾»¬¿½®À¿­À½±¾½¬»½¬Á¾­¾¿®Á»¬¾¾°¾¾±¾¾¯Á½¬À¾®Á¾¯¾½¬ÁÀ¬Á»«»¿¯¿¾°¿¾®½À®¾¼°¾¾®Ã¾­À»­ÀÁ¯ÁÀ±Â¿¬ÁÀ±ÁÁ¬Á¼®Á¼­ÁÁ²ÀÃ°¿À®Á¿¯ÁÀ­ÂÁ¯À¾¯ÄÁ¯ÂÁ²ÃÂ²ÁÀ¯Á¾°¾À²ÂÃ®ÂÃ²ÂÁ°Ã½­ÁÅ³ÂÂ³ÃÃ²ÃÁ²ÃÀ¯ÃÅ¯ÂÂ±Ã¿°ÅÁµÃÃ³ÃÂ·ÄÁ¯ÃÂ±Æ¿´ÃÃ³ÇÃ²ÅÆ³ÂÁ·ÅÃ¯ÆÃ³ÅÂµÃÅ³ÆÄ¶ÅÃ°ÅÁ±ÃÃµÆÁ±ÄÁµÆÁ²ÆÃ³ÅÅ²ÆÁ³ÄÃµÆÅ¶ÆÆ³ÆÄ·ÈÆ¶ÄÅ´ÆÅ³ÆÆ¶ÇÈ·ÇÆ´ÈÅ´ÃÆ¶ÅÇ³ÃÆ´ÆÆ·ÅÅ¶ÅÈ³ÆÇ´ÆÇ¶ÇÄ¶ÅÆµÆÇ³ÄÄ³ÄÄµÇÈ³ÃÄ³ÊÆ´ÈÈ´ÆÆ·ÈÄ¶ÆÇ¶ÅÅ¶ÄÌ¸ÊÈ´ÆÈ¶ÈÄ·ÇÉ³ÅÇ·ÈÈ·ÆÆµÇÌ¶ÈÆ¶ÈÇ´ÊÈµÆÈµÇÈ¶ÆÆ¹ÆÆ·ÉÅ¶ÆÅ¶ÄÆ¶ÈÅ¹ÇÈ¶ÈÆ¸ÆÇ·ÈÌ¹ÉÉ¶ÆÍ¸ÈÉ¶ÈÆ¶ÈÈ¶ÊÈ¹ÈÆµÉÆ³ÇÇ¸ÊÈ¶ÊÈ¶ÇÈ´ÅÈ¶ÉË»ËÈ´ÈÇ¸ÈÊ·ËÊ·ÈÆ¶ÆÆ·ÊÈµÆÈ¶ÈÆ´ÇÆ´ÃÄ³ÇÃ²ÄÆ±ÆÆ°ÅÅ³ÁÃ¬ÀÀ«»½­¸¼¨¶´¦­­§¡wkltt~{{xotnnlkn|o~n~kg~lf~bxz_|g_ti[tk[wl]tkWwoYor[qrbwu]utYrk`zo_rodxr`wk_xl`rr`z{bu{fzno{{ktibno`qb[liQldUdbUkdWldUkfYidUgbQifQf`Mg`UkbSldOd`SfdSibUd_[iiOidYfdSg`Qii[nkYldWl_Od`Qn`Wi`Sf`Md]SibQggSibUkbSf_Sg_SkiSgdSkbYl`QibSkdSggSnfSqdYkiSodWliYqdUll[nn]ul[ro`qlYnoYro[tq[uk_zi_uriwwl{l~i~|o|xi|xg{xi{uf~{ix{bru]unWqfYobWqkWqfYng`tn[uoizxt¯¨¨¼±¶Ã·¼ÊºÄÊºÅÎ¾ËÎºÉÈ¼ÈÍ¼ÌÐ¿ÐÍ¾ÎÎ¼ËÏ½ÎË½ÍÑ½ÌÒ¼ÎÍ¿ÍÍ»ÌÐ½ËÐ¼ÎÌ¾ÊÎ¾ËÎ½ËÎ¾ÊÏ¾ÎÌ¾ÎÐ»ÎÎ¿ÍÍ¿ÎÐ¼ÌÎ»ËÍÀÌÏºÌËÀÍÎ½ËÐ¾ÌÌ»ÍÎ»ÎÍ¼ÍÎ¼ÍÎ½ÌÌ¼ÍÎºÌÎºÊÊ½ÍË½ÊÎ¿ÊÏ¼ÌË»ÌÉ½ÊÊ¼ËÌ¼ÌÏ¼ÉÊ¼ÉÉºÉÌ½ÎÍ»ÌÊ»ÊÌ¼ÊÉ»ÌË¾ËÊ¶ÊÌ¹ÍÊ¼ÎÌ½ÉÌ¹ÊÊºÊÉ»ÌÌ»ÌÊ»ÉÊºÊÉ»ÊÌ¹ÍÈ¸ÊÊ¹ÈÊºÊÌ»ÊÇ»ÉÌ¹ËË¹ÊÆ»ÈÉ»ÆÈ¹ÊÊ»ÉÉ»ÌÈ¹ÆÈ¹ÊÈºÊÈ»ÉÉ¶ÊÆ¶ÃÊ»ÇÈ»ËÈ¸ÈÇµÈÉ·ÈÊ¹ÇÈ¸ÊÈ·ÇÌ»ÉÆ·ÈÃ·ÆÅ¸ÊÆ·ÉÅ·ÊÇ·ÇÆ·ÆÇ·ÃÈ³ÅÄ¹ÃÈ³ÈÉ·ÃÃ·ÇÇ³ÇÅ¸ÅÆµÊÇµÆÅ¶ÆÄ´ÆÅ·ÅÆµÅÆ·ÃÄµÅÈ·ÄÆ·ÈÆ¶ÇÄ·ÆÆ³ÇÃ¹ÃÆµÇÆ¶ÆÄ¶ÇÄ¶ÅÃµÄ¿´ÆÆ¶ÈÃ´ÁÃ³ÃÃ·ÃÃ·ÃÆ´ÄÅµÂÃ±ÄÂ·ÅÅµÆÂ³ÃÃ³ÆÁ´ÁÄ³ÅÁ³ÂÀ´ÁÁ¶ÂÃ³ÁÂ³ÂÀµÃÃ³ÂÂ´ÂÂ´ÂÁ³ÁÅµÁÂ³ÁÃµÃÀ³ÃÂ³ÂÂ°ÂÂ²¿Á°ÂÂ³ÂÁµ¿À±ÁÁ¯¿À±ÃÁ³ÂÁ´Ã¾µÁ¿´ÂÁ³ÂÀ³Â¿²ÁÀ³¿Á²ÁÂ°À¾²À¿±¿À³¾Á³ÃÁ³ÁÁ³ÀÁ³Â¿±ÂÀ±Á¿³¿Á°¿À³À½°ÀÁ¯¿¼°½¿²Â½¯½¿±½¿¬Á¾®¼½²¾¿³¿¾²Á»°¾¼¯¿À¬¼À±½¼¯½¿¬À¾³Á¾³¾¾°À»¬¿»¯½¾°¾¾³¾¼³¾À¯»»°»¼°¿½¬»¼­½½­½½®¾¹¬»¼¯¼¼°¿¿­½º°»¾®¾¾­½¾¯¼¸¬º¾®½¼®»»¯¼»ªº¼¬¾¹°»¼¬½¹¬¸½«»·¯¹¼­½»±»º°¼»°»»¬¼·«¸¼°¹¸¬¹¹¬º§ ¯­ µ­·®¶°´¯¶¬´®´­£¸¬¡µ° ·­¸® ¶²£´°¥¸®¡·³¥¸²¢·¯¢¸° µ¯´±£¸¯·³¤·³¤·°¡¸® µ²£¹¯¤¸±¸° ·²¡·°£·±£¸²¡¹²£»²¢º²£¹³¶²¥»°§·´£º³£¸²¥»³¦»±¡¹³§»´£¼²£¹´¦¹µ¥º³¡¹³§»³£»³¢·µ¥½´¤»³¦¹³§¸·¦»³¥»µ£¾µ¨»µ§¾µ¤¾´¦½·§»·¥¿´§¹¶¨½¸©¼¶§»³§¼·©¼³§¾¹ª»¶£¼·«¸µ¨¼·§¼¹©¾¸§¾¸¥¼¸«½¹ªÀ¸¦½¸ªÀ·«¾¸ª¾¸©Á·ª¾¹ª¿·¬¾»¥¿¼¨À·¬¾¸§¾·ª½¸§¼»¬Àº«À·«Á¹«½º©Á¹©Àº«À·¬Á¹ªÁ¸«¾·¬À¼«¾½¬Á¸«¾»«Ã»¬À¹­Â¾«Â¾®Á·ªÁ»¬À¾¬À¸ªÃ½¬Ã¼ªÁºªÁ»©À»©Á¼«Á½«Á¿«Ä½«Ä»¯Â¼®Â»®Á¾­Á¾«Ã¼«Ã»®Ã»ªÅÀ°Ä¿©Ä½¯Â»¬Å¾­Ä¿®Ã½¬Ã½¬Ã¾­Ä¼¬Ã»®Å½²ÄÁ´Â½¬Åº°Å½¬ÁÀ°È¿¬Æ¿¬Â½±ÃÁ°ÃÁ¯ÄÁ­Ç¾¯ÅÁ²È¾®Å¾°ÈÀ¬ÄÁ²Ä¿¯ÄÁ²Ã½°ÅÁ²Æ¾²ÇÁªÆ¾²Ä¿³ÇÀ±ÄÁ²Ç¾³ÄÄ±ÆÁ¯ÇÀ°ÈÀ®ÃÁ±ÆÁ¯ÈÂ²ÆÃ²ÈÃ²ÄÀ°ÇÁ³Æ½¯ÈÂ²ÈÂ®ÈÂ´ÈÃ³ÅÄµÈÂ±ÄÁ°ÅÂ°ÇÁ³ÇÃ³ÊÃ¯ÈÀ²ÆÃ³ÉÃ®ÈÂ´Ä¿±ÆÃ±ÅÄ²ÆÁ¯ÇÁ®Æ¾²Æ¾®ÆÁ­ÅÃ±Æ¿²ÆÃ±ÆÃ°ÆÃ³ÇÃ³ÄÃ³ÇÀ³ÈÁ¯ÅÂ¯ÅÂ³ÆÃ¯ÆÃµÄÁ°ÆÃ³ÈÃ°ÇÁµÇÄµÉÃ³ÈÃ´ÈÃ³ÉÃ°ÆÂ°ÈÀ®Ç¾²Ã¾°Ã¿±ÆÁ°Ã¾±ÄÃ¯Ä¾°ÄÁ°¿»¬¾¹¬·¶¤¶¨¬¦tfgignz~rqtgxbt`u``~f|fg|fu`|q]r]zkfzqb|o]|n_{fWwdQ{nWzkQxiYxgQwiUznSxiYxk]xkWwgW|n`zoW|iY|lY|wfgkwi~wdwibxfQt_Mo[Ko`Qn_MnWOqWKi]Qk_KiWKbYFfUOgUFkSIdUIiSIiQIiUMgSKgUIgYKgYOgWIkUMdWMk[Mn`MiUMk[Ik]Ig[FfUMgUIiUKgUMgYFfUKkYIgWIkWIk[IgUKlYKgYMkYKn]Ml[Mn[Ol`Il]QoYKo`MqfOndMr`SqkYtnWznSwdUwdSwdUtgWxgUzlYxi`zlbzrf|ugw_o[~t]zg`zig{qk{n]{dUu`Ml`MnYWn_Ql`Qq`Uwi`xl`rku© ª±§³¾­¿ÁµÃÈµÇÄ·ÊÆ³ÊÃ·ÉÌ»ÌÊ»ÌÉ·ÊÊ»ÊÌ»ÊÈ»ÍÉ¸ÌÆ¹ÌÉ»ËÌ¸ÍÆ»ÌÈ»ËÊ¸ÈÈ¹ÐÊ»ÎÉ·ËË»ÎÈ¸ÊÈ¸ÎË¹ÌÈ¸ÌÈºÌÉµÍÈ¸ÎÉ´ÊÈ»ÌÈ¹ÌÇºÍÊ»ÌÈ·ÍÇµÈÈ¸ÊÈ»ÌÆ·ÌÈ¶ÊÆ¹ÉÇ¶ÊÊºÌÆºÉÆ·ÊÈ·ËÆ¹ÊÆºËÆ³ÈÇ·ÊÃµËÆ´ÊÆ·ËÃ·ËÇ¶ÇÈ·ÊÄ¹ÌÆ¸ÎÅ¸ÉÆ¸ÊÅ³ÇÈ·ÉÄµÉÆ·ÌÇµÇÅµËÄ·ÊÃ·ÊÃµÈÄ·ÌÅµÈÆ¸ÊÆ¶ÊÊ¶ÇÆºÈÃ³ÊÃµËÃ·ÊÃ´ÉÅµÈÅ·ÈÃ¹ÊÄ¶ÈÃ³ÈÄ³ÊÆ²ÊÁ´ÅÄ·ÆÁ³ÉÉ·ÈÃ¶ÆÄ·ÈÃµÅÅµÈÄ³ÆÅµÈÃ³ÇÁµÇÂ°ÇÃ°ÄÀ±ÅÃ³ÆÃ±ÄÁ¶Ã¿´ÅÃ®ÈÁ´ÄÀ²Æ¿°ÄÁµÆÀ°ÆÁ±ÄÁ³ÉÃ²ÈÁ´ÆÂ³ÈÂµÁÂ³ÈÁ³ÅÀ¯Å¿´ÆÃµÅÀ°ÄÂ²Ã¾±Ã¿­ÇÁ³ÆÁ±Ä¿²Å¾±ÆÀ¯Ã½²Ä¿³Ã¿²ÆÃ²ÄÂ±Ä½°ÃÀ²Å¾°ÃÁ°ÃÁ¯Â¿±Å¿®Ã½±Æ¼±ÃÁ±Ã¾°Ä¾®Â»®¿À³Ã»±Ä¾­Á¼®¾¼¬Ã»¬Â¼°Ä»­Á»¯Á¾®Â»­Á¾¬À¼­Áº¬À¾°À½¬Á¾°Á»­Á¼°À»¯Â½¬¾¼«Á½­Àº°Ã¼®¾º¯À»®Á¹¬¾»­½º±¿»¬¿¸¬¾¸­Â»­¾¾¯Áº¬Àº¬¼º®Áº­¾»«Â¼­Á»©¿¹¬¾»ª½½­Áº®Á¹§½º®¾»°¾»ªÁ¼­Àº²Â¸­À¶«¿»¬¿¸«¾»¬¾º¬¾·¬¾¸¬¾·²Á¹©¼º©»ºª¾¸«¾·©¾·§Áº¬¼¸¬¾¸ª¿·¬¼·¬½·¨¿·ªº¸©¾µ¨º·«¾¹«»¸«ºµª»·«¾µ«»¸«¼³§½¶©¼µ©»¶©¹¸«»·¬»¶©½·©»³©º·ª½·©»µ§··§»µ©¸´§¹¶©º³¥¹³«¼¬£²¹¥·µ¥¶³¥µµ¨··¬µ·¤·³¤¶´¦·¶¢¶¶¦¶¶§¶¶¡¸³§µ·©µ·§·µ£¶¹ª··¦º¶¤·¸¦µ¶ª»¸¦º¶¤·´¨¸¸¦··§¶µ§¹·©µ¶§·µ§··¨¹·ª¸µ¨··¦¾·§º·ª¼·§¹·¤º¹ª¸¶§º¸§ºº¦º¹ªº·©·º¨»º¬»»¦¹¸¤µ·¦¼º©¹·ª·»ªº·¨»º«¹»ª»»©º»«¼½«»¹«»¹¬·¹¬À»¬½»¨»»­»¼¬¼»§¼»¯¾»©¿»¬À¾­½»«¼¾¬½»¬¼º¬¿»­¾»§¼º®¾º¬¿¾®½»¬½¾¬ÁÀ®½¾®À¼­¿¾¬¾½®¾½¯¾¾­ÁÀ¬¿¾²¿À®¿»­¾¾¬À¿²Á¿¯À¾¬¾¾­¾¿¬À¾¬¼¾­À½±¿½°Á¾¯Á¾¬½Á°¾¼¯ÂÁ±ÁÀ¯Á¾¯ÁÁ°ÅÀ²Â¼°ÁÁ­ÃÀ¯ÃÀ®ÃÁ±ÂÀ²ÁÁ¯ÂÂ®¿À®Â¾±Á¿°Â¾­Á¾³ÁÁ±Á¾®ÃÁ±ÃÁ®ÃÃ¯ÂÆ³ÆÀ³ÅÀ®ÁÁ³ÁÃ²ÃÂ±ÂÀ³ÆÄµÃÁ²ÅÁ³Â¾±ÅÅ³ÆÃ·ÄÃ¶ÄÃ²ÄÄ±ÃÅ³ÅÃ¯ÁÂ³ÄÃ±ÃÂ²ÄÃ³ÃÀ³ÂÃ³ÄÆ³ÄÅµÅÂ´ÅÅ°ÁÃ´ÃÄ¶ÈÄ¯ÄÇ¶ÆÅ·ÃÅµÅÇ²ÄÃ·ÄÈ³ÈÅ³ÂÃ³ÉÆ¶ÁÆ³ÇÃ³ÈÅ³ÄÆ±ÇÅµÈÆ´ÉÆ³ÂÆ¹ÉÅ³ÈÈµÂÄ´ÇÃµÈÆ·ÈÄ³ÆÈ¶ÄÆµÈÅ³ÆÄµÇÅ³ÃÅ´ÈÇ¶ÈÊ±ÇÆ·ÈÆµÈÈ¶ÉÈ·ÈÈ¶ÆÇ´ÆÊ´ÈÇ´ÇÅ³ÈÊ·ÇÈ¸ÊÈ²ÊÈµÈÈ·ÈÇ´ÈÈµÂÆ·ÆÇ¶ÇË·ÈÈ±ÉÆ³ÅÃµÃÄ¸ÃÆ¶ÆÃ¶ÆÈ³ÈÄ´ÈÆµÄÆ´ÅÆ¹ÉÈ¶ÇÆ³ÆÈµÃÃ³ÇÈ¸ÅÈ·ÆÈ·ÇÊµÆÈ¸ÊÈ·ÆÌµÆÈ·ÇÅ¶ÆÆ³ÅÅ¯ÄÇ³ÆÊ³ÄÈ¶ÇÇ¸ÈÈ¸ÃÈ´ÅÈ·ÁÃ³½À®¹»­³¶£®­¨¡¥¤uuoqrz qld~fdoqrqnizf|t_|u[zo`zk`{u_zwd{ud{u`w{dzrbzxdxx[{t_{w]zubz{d|_zxf{{izg~ionz~u|uitubrkWogYtgSoiYkdWliOfdSndUk`YgbQi`Qd]Mi`Sd_MkWQ_`Qk]MfWQb`Ub]Qf]Mb_Wd_WdbQlbQ`_UiiSgiUgdUd`SkfU`bWlbYfdMk[Kg]OidMd[UgbSbiWngWkd[giOldUkbUgdQniWkfQlfSngSkdYlnSniUokYqfYql[ol[rrbwrbtu_tt`wq_tud{zg{{d{{kzui{zi{{i~{o~onzf{u`xn`wn_robru`ro[uf]qiWlg]lk[oo]nq]tn[ul~r­¤©À°´Æ³½Ç²ÁÄ¸ÃÆµÆÆ¸ÉÌ»ËÌ¹ÌÐ»ÈÎ¼ËÐ¾ÌÊ¼ËÏ½ÍÌ½ÌÎ¼ËÌ¿ÌÎ¿ÌÌºÌÐ½ÌÌ¾ÌÐ¾ÐÍ½ÈË½ÍÐ½ÍÎ¾ËÐÁÊÐ»ÎÏ¼ÎÎ»ÎÌÀÐÌ»ÉÍ¸ËÊ»ÏÎ¾ÊÎ»ÌÍ¾ÍÏ¿ÍÍ»ËÌ½ÎÍ¼ÊÍ¾ÊÎÀËË¼ÎÌ½ÌÌ¼ÊÏ»ÊÉ»ÊË¼ÊÌ»ÎÌ»ËÌ¿ÌÌ»ÊË»ËÎ»ÈÈ¼ÊÎ¸ÉË¼ÌÌ»ÌÌ¹ÊÌºÊÍ»ÊË¼ÌË¼ÈÊºÍÊ»ÌË»ÊÈ¹ÉÍ¼ÊÊºËË¶ÈÍ»ÉÉ¹ÊÌ¸ÉË¼ÊÊ¸ÊÊºÆÌ»ÈÉ»ÌÌ»ÊÈ·ÍÉºÉËÀÈÊ»ÉÊ¹ËÈ·ÈÊ¼ÊÉ¹ÈÈ¸ÊÊ»ÆÆ¸ÊÉ¸ÈÆºÈÈ¶ÉË¹ÈÆ·ÉÈ·ÈÉ¸ÅÈ¹ÈÅ¸ÇÆ·ÆÇ¹ÆÆ´ÆÈ³ÈÆµÆÆ¶ÇÇºÆÆ¶ÈÈ³ÈÆ¹ÆÇ´ÆÅ¸ÉÆ¸ÅÉµÇÈ»ÈÆ¸ÉÆ»ÃÈ¶ÆÅ¹ÄÆµÆÆ·ÆÆ·ÈÃ´ÇÆ¹ÆÆ¹ÄÅµÄÂ·ÅÃ¶ÇÃ¹ÆÅ¶ÄÅ´ÇÆ³ÃÂµÄÈ¹ÆÆ·ÄÆ·ÆÅ³ÄÃµÄÃ³ÄÁ´ÆÃ·ÅÃµÃÅµÅÃ·ÃÄ´ÄÃ·ÆÅµÀÅ¶ÂÁµÂÂ¯ÃÃµÃÂ³ÀÂ´ÄÁµÃÃ³ÂÂ°ÃÃ³¿Á¯ÃÃ³¾Á´¾À¯ÁÂ³ÂÃ°ÁÁ²ÃÁ²ÂÀ²Á¼´¾Â¯ÂÁ®ÁÀµ¾Â¯¿Á¯¾Á²ÁÁ±¿Á³À¿¯¿¿°¾¿³ÁÀ´¼Ã±ÀÁ±ÃÂ³¾Á³À¿°ÂÁ°¾Â²À¿³ÁÀ±À½¯¿¾³ÁÁ±¿¾°Á¿°½¿²ÁÁ³¾Á¯À»³Á½¬¾Ã·¾½³¾¾²ÀÂ³¿¿´ÁÀ¯Á¾°¾¾³¿¾¯¾Á±½»³¾Á®ÀÁ²¾¼¯¾¼¬¾¼¬»¾²Á½®¿¾­¼¿¯Á»­½¿­¾¾°½¾¯½¾³»½²¾»­½Á¯¾¾®»»±¾¼°½½¯¼¾°»¼­¾»­·»¬¼º®½·­»¼¯¼¼±»»­¾»¬¹»¬¼¼­¹½®»»±¼¼­»½±»¼¬»¸ªº»¯»»¬»»­¹»ª¹§±®´¯¡·®¡³¯µ°¶°·±¥·­²«·¬£´° ´° ¸±¡µ®¡·±§·°£´² ´°¡·±¡·°¡·°¡·²£·±£´³¥·³·¬¥·³£·°¢¹´¡¶°¡¶²¦¸³¡¸°¢·°¡·´£¸° º³¤·²¡·´£¹³¤º³¨¹³¡¸³£·³£»³§¸³£·´¦»³¤¹²¤º³¤»·§¹³¢¹³¦»²£ºµ§¶³¤¼°§»¶§º´§¼¶¤ºµ¥»³§»·¥»·¦¸³¤º´¤½³£¼µ¦º³£ºµ¤º³©»µ¦»µ§»·§½¶¨»µ§»·«»¶§»·¨¿µ©¾µ§½µ§¼¹¨À¶©¿·§¾¸§¾·ª¾¸¬½·¨¿·«¾¸§½·ª¾¹©¾·ª¾¸«¾·«¿²©½»®¿º­À¹¨Á»¨¾¸ªÀ·ªÀ¹«À¹¦À¹¬Á»¬Á»©¿¸¬Âº§Á¹¬¾½¬À¸©¾»«¿¸¬Á»«Á»­¿½¯Á»©Á¼¬À·¬½»«À¸§Á¹«À¶ªÃ¹ªÁ»­Á¾¬Á½ªÃ¼¬Á½®Ã¾­Áº®¾¿¬ÂÀ«Ã¾¬Ã¼­Ã¿­Àº®Á¾°Ã½«Â½¬À¿¬Æ¼­Ä»­Ã¼°Á½²Å½®Â»¯Ä¼®ÃÀ­Ä¾¬Ã»«Á¼°À¿®ÃÀ°Å¾­ÃÁ°Å¾°Ã¿®ÃÃ²Á»°Ã¼°ÆÁ¯Ã¾®Ã¾²ÅÁ¯Ä½²ÇÃ®ÄÁ±ÃÁ­ÅÃ±ÆÁ²ÄÀ²ÆÀ°ÆÁ²Æ¾³ÄÁ­ÃÂ²ÆÂ°ÄÀ°Ä¿µÇÁ°ÆÀ±Ç¾±ÃÀ±ÃÂ²ÆÁ±ÇÃ°Æ¾®ÇÂ´ÈÄ²ÈÁ±ÈÂ²ÇÂ°ÆÃ³ÇÁ±ÆÀ®ÆÀ²ÇÂ³ÊÁ³ÄÃ°ÇÃ²ÆÂ±ÊÂµÈÁ³ÈÃ²ÇÃ²ÅÁ²ÆÁ²ÇÄ³ÈÁ³ÈÁ¯ÆÃ°ÆÃ²Ä½²Æ¾­Ã¿®ÆÀ¬ÄÀ°ÅÁ³Å¿²ÇÁ´ÇÃ­ÇÁµÆÃ®ÅÃ³ÃÁ²Ç¾¯Ä¾±ÈÂ²ÆÄ°ÄÂ°Æ¾°ÃÁ¯ÆÃ²ÅÂ³ÆÁ²ÂÁ´ÃÃ³ÄÁ²ÂÅ±½¿°¿»©º¬²§¬¢|xng|nkwxqtnwdt_u_|ddgnn~gw_l]znY|kU{nU|lYzi[|k[|nb~r[o]|q]t]|r]|oWzo]nYz[t`u`zfzgzkzn|g~ntd~w`l]w[QrbOr[Qn_So_QlUMrYDkYMgUKkSDg[KfOIgOBdWFbQDgOFfQDdQKfKFbQFbIIgQDfQDgQIdSDiQKgUIgQKkQMg[IkUKiUMf`Kk]MnYIgSKfQIlUFgYKfUKlUMk_MkWQnYFgUFkWOl[MlWMi[Ki[KiWKn[MiYQq[Kk`Or_QlfMtgQtdUofUwfQrfUzd]wl`ww_|bb{btgtgud|ixd~ftblY{gUu_Ur_YrdSobUq_QkSFlYQqYMobOt`YtiYuk[z|{¯¦¯¾³·Ç³ÃÉ³ÇÆ±ÈÄ®Ã¿­Ç¼³Ê¿¶ÇÃ³ÇÈ¶ÉÆ·ËÇ¸ÊÈµÊÈºËÊ¹ÊÈ·ÌÉ»ÊÈ´ËÉ¹ÌÉ¸ÌÆºÊÊºÍÊ·ËÊ·ÍË»ÌÈ¸ÌÈ¸ÌËºÌÇºÍÊ·ÍÈ·ÊÅ·ÊÈ¸ÌÊ·ÌÆ·ÊÄ»ÌÊ¸ÊÈµËÇºÊÆ¶ÌÊ·ÊÈ¸ÎÈ¶ÊÇ²ÊÈºÌÈºËÅ¸ÊÅ¸ÊÅ·ÊÇµÉÇ¸ÈÅ·ÊÈ³ÇÈµÊÇ·ÉÈ¸ÈÅ¹ËÈ¸ÊÅ¶ÌÆ¸ËÈ´ÊÇ·ÉÆµÈÅ¸ÈÂ·ÈÆ¶ÊÅ·ÈÇ¶ÈÄ·ÈÄµÇÂ²ÉÂµÊÃ·ÈÈ¸ÊÇµÇÃ·ÈÃ¶ÉÇ¸ÈÅ·ÈÄ¶ÉÃ·ÈÆ¶ÈÅµÈÃµÇÃ´ÊÃ´ÆÃ³ÆÅ°ÇÃ·ÅÃ¶ÈÃ±ÈÄ¶ÈÆ³ÈÄµÇÁ·ÉÄµÅÁ³ÆÁ¶ÆÃ±ÆÃ³ÃÂ²Æ¾³ÆÁµÄÁ³ÈÀ³ÇÄ¯ÄÃµÃÁ³ÆÃ·ÄÃ´ÄÁ³Ä¿°ÆÁ³ÆÃ³ÈÃ²ÇÂ³ÃÁ´Ã¾²ÃÀ²ÃÁ±ÆÁ²ÄÃ°ÂÂ³Æ¿²ÆÀ³ÄÃ³Ã¿³ÆÀ°ÂÁ°ÃÁ²ÃÂ®Å¿²ÇÁ±Ã¾±Å¾¯Â¾¯Ã¿±ÃÁ²Â¾²Æ¾±Å¾®Ã¼°Ä¼¯Æ¾°ÂÀ¯ÂÀ²Â¾®Ä¾¯Á¾¬Á¾¯Á¾¯Ã½­Ã»°Á¾­Á½¬Â¼®Ã»­¾¾®Â¼°Â»­Ã¼®À»°Á»®¾»¬Á¸­À½­Á½©¾»­¿»¬¾»¯Â½­¾ºªÁ»°¾¾¬À»°Àº®Â¸®¿»­Á½®¾»®¾»­¾»­¾º¬Àº«½º±¿¸°Á»¬¿¸¬¾½¬Ã»®À¹ªÂº¬¾¸¬¿¼«¾»­¾»«¾º«¹º®¾»°½½¬¾»­¾»¬¿º¬¿¹­¾¶®¿º©½»­¾¶¨»·«Á¸¬»·¬½·¬½µ«»·¬»¹¬¾·ª½·¬¾º©¼¸¬º¸¬»µª½¸«º¸ªº»¬½µ©»¸ª½·¬ººª»·«»·­»µ¨¸¶¨»¶§»¶¨»·¨½µ§º³¥¹µ©»·©»³¨¸´¨¹¶ªº¶§¹³«»¶§ºµ§»¶ªº¶«¼µ¥»·¨»­¤±³¤¶·¥¸·¤·³¥¹·£µµ©¶µ¢º¶¦¸¶¤¹³¨·¶¥¶³¦·³§´µ§¸³¢·³¦¹´¦µµ¦¶µ¨¹¶¤¶´¥¸¶ª·¶¢»´§º·¤¶µ¨··¢··¥¸¹¤·¸©º·¥»·©¶¶¦¸¶§¸»¨¶³¥¹»¨»¶¤·¹©¸º§»¸ª»¸¦··ª¸·¨¹·¨¹·©½º¨»»©¹¹¥¹¹«¿·¤¹¸ª¸ºªº¹©»·«º·«»º¬¼ºª¼·ª¼»«½»¨»º­¹¸ª½»¨¹»¬¹»¬¾¹¬º¹¬»¾¬¼»«¾¹¬¿¼­Á¾ª¼¹¬½¹«¾º¤¾½®»¸¬¼¾¯¾¿¬½¼¯¾»«½Áª¾»®¿¾­Á½®¾¾­ÀÁ®Â½¬¼»¬Ãº¬À»­¿¼¯¿¼¬Á¼¬¿Á¬ÀÁ¯½Á°¿¾¬Â¼­ÁÁ³Â¾±Â»®Ã½¯¾Á¯¿¾®Á¿­¿½®½Á´¿À³ÃÀ±À»®ÁÂ±ÁÀ°ÀÀ³À¼­ÂÂ³Ä¿²Á¿®Ã¿¯¾¿¬ÃÀ­Á¿«Á¿³Á¾°Ã¿¯ÃÁ¯ÁÁ¯ÃÃ²ÁÃ³ÂÀ±ÁÃ²Á¿³ÃÃ³ÅÃ¶ÆÅ±ÄÅ²ÃÅ²ÄÁ®ÂÁ³ÂÁ¯ÉÃ¶ÄÃ±ÃÄ³ÆÅ±ÄÄ³ÅÁµÇÀ°ÁÅ²ÈÃ³ÅÆ²ÆÂ¯Ç¾µÅÆ²ÅÃ¯ÅÆ³ÄÃ³ÄÃ¶ÅÄ³ÆÂ´ÆÆ´ÄÁµÆÃ³ÈÂµÈÆ³ÇÃ·ÅÂµÆÇ´ÆÅ¶ÇÅ´ÅÈ´ÈÄ±ÆÄ´ÇÈ¸ÇÅµÈÄ³ÄÆµÅÆ·ÆÄµÇÆ·ÈÆ¶ÈÆ·ÈÈµÆÅ¶ÈÇ³ÆÇ³ÇÆ³ÈÃ¹ÇÈ¹ÅÈ·ÈÆ³ÆÅµÇÇµËÅ·ÇÅµÇÇ·ÇÆµÇÈºÊÅµÄÇºÅÍ¹ÆÇ¹ÉÇ¶ÈÆµÆÊ·ÆÇ¸ÆÈ·ÉÆ´ÃÅ·ÇÅ¹ÆÊ¹ÄÆ¹ÆÇ¸ÃÊ¹ÆÇ³ÇÇ·ÈÆ±ÇÈ¶ÇÀ³ÃÄ³ÁÈ³ÆÄ·ÅÉµÅÃµÇÈµÆÈ·ÆÈ³ÈÊ±ÆÇ·ÈÈ´ÅÈ²Ã¿°ÂÂµÃÅµÅÃ´ÅÄ³ÁÆ¶ÁÈµÅÄ³¿Á·Á¾¬½¼«·³¤¶¬¡«¦§©¢zuruwz|qt~ixiffil{n{kkizdu_zzb~t[xb~zb|qdb|~k|i|dri{f~ikf~f~noonrtl{zo|qudznbxn[wl]ukWrgYriQrgUi_WqdSibOi]SgdQidQi[Ui_Qd_Of]Qd`Od_Of]SgYOgYMk]Mb[Od]Of`Qb]Sg_Qf[Si]Yf_Uk_Sg_Ui`Oi`Yfk]llSkbSi]SobSfdSf`[ff[kiUnd[ldSidSlbUkgQkbMlfUl`WnbQkkWigWobQnnYqg[nq]to`qtbru]zt[un_xu`uubwqfwzltlxui{xn~l{l|{kkzti|i~n_{l]qkbqg]ubWnbMlbWodSld[td[lk]rq_w{k¥¢»³³Ç»¿Î¼ÅÍ¾ÈËºËÈ´ÆÌ·ÈË¶ÆÆ³ÄÆ·ÉÉºÌÌ¹ÈÌ»ÊÍ½ÍÌ»ÈÎ¿ÊÐ¿ÎÌ½ÎÏ¼ËÍ¾ÎÍ»ÎÊ½ÌÌ½ÊÍ¾ÐÐ¼ÏÍ¾ÎÊ¹ÌÏ¾ÉÍ½ËÎ¿ÐÌ¾ÊÍ½ÎÎ¼ÌÐ¼ËÌ»ÊÌ¼ÎÐ¿ÐÊ½ÊÊ½ËÊ¸ËÌ¼ËÊ»ÏÌ»ÊÌ»ËÎ»ÌË¼ÌÍ»ÎÊºÌÌºÊÆºÊË¸ÊÊ¾ËÌ¹ÌË¼ÌË¼ÈÌºÊÊ»ÌËºÍÊ»ËÌ¼ÊÌ¹ËÊ¼ÌÌ¼ÌÊ¼ÌÊºËÊ¹ËÉ·ÈÌ»ÌË¼ÈÉ¼ÈÊ¹ÊÉ¸ÉÊ·ÈÇºÈÆ¸ËÉºÇÉ»ÊÊ¹ÇÆ¹ÈÊµËÍ¼ÊÉ»ÉÈ»ÊÉ¸ÈÇºÈÆ·ÉÇ¹ÈË·ÆÅºÆÈ¼ÈÆ¹ÊÉ·ÈÊºÊÈ¸ÅÇ¹ÈÉºÉÅ´ÆÈºÅÇ¶ÈÅ·ÅÆ·ÇÈµÆÅ·ÈÈ»ÇÆ·ÉÇ¹ÆÅ¸ÆÈ¶ÆÇ·ÈÃ·ÆÈµÅÉµÈÆ·ÆÅ¶ÆÆ¹ÇÅ³ÂÇ´ÈÅµÅÅ·ÆÃºÈÆµÆÃ³ÇÄ´ÈÆ·ÈÆ¶ÄÅ¶ÆÆ¶ÅÆ´ÁÃµÅÃ¶Æ¿µÅÇµÆÅ·ÄÁµÅÃµÃÃµÇÄ·ÅÆµÈÀµÈÆ³ÃÂ³ÃÂ´ÅÂ³ÃÃ³ÁÃ³ÃÁ´ÁÃ³ÆÀµÁÃ±ÁÆ³ÀÁ°ÄÁ²ÂÁ³ÁÀµÂ¾³¿¾³ÃÁ²À¾°ÃÂ²ÀÁ³ÂÁ³ÄÃ­ÃÁ²Á¾³Â¿³ÂÃ³Ã¾­ÁÃ±ÂÁ¯Á¾´ÂÁ¯ÂÁ¶ÁÁ³Á¿¯ÁÀ°Ã¿³Â¿³ÀÀ³¿Á³¿¿³ÃÃ°Á¾µÀ½³¿¿³¾Á³ÁÀ°¿¿³Á¿±Ã¾±¾¼³ÀÁ²À¾³¾Á¯¾½¯¾¾°ÀÀ±ÂÀ´ÀÁµ¾¾²¿¿®¿½³¿¼¯¿¾¯»¼®ÁÀ±Â½°¿¾¯»¾¯À½±ÁÀ¯¼½¬¾»²¾¿­»»±¾¿®»½®¾½³½º±¾¼®½¾¯¾½­Á»®»½¯¾Á°¼»²»½ª¹º°»¼¯¹½±¼¾¯¼º¬»¹®¸½­»¹«¼»®¼¾¬¸»¯¹ºª»¸¨¸¹¯¹¸­½»¯»·¬¹½³¼¼­»¹¬½½°º»­¾¹­¼º¬»¨£°®¶° µ°µ¯¦µ¯ µ³¡·°´²¡µ®£´¬¢²°¡·³£µ­ ´¯¢µ²¡µ­£³¯ ´°³±³°µ­ ·®µ±§·° ³°¢·®¢¸°¡¶®£¸¯¸°µ®£µ¯£·±¢µ±¡º°¥·°¶±£»±¡¸²§¸²§¸² ¹³¥¶µ£»´¥»³£º²¥º²¥º´¤º³¥¸±£»³£·²¢¶°¢¸³¢º·¥»µ¤¹µ¤·µ¥·µ£ºµ¤¹³£º²§º¶¨¼°£º°¥¸¶¤¹¶¥¾µ§¸³©»´£¹¸¥¸³§»·¤¼µ¨º·§¼¶§½¹ª¾·©»µ©»¹§½¸ª¾·¦À¸§¿¸«½º©¾·¨½·©¾¸¨¾·¥¿·§»·£¾º«¾¶£¼µ©¿·¨À·¦¿·©»¹¥¿»«¼º«¾º¦¾¼¬Áº«¾¸ªÀ·¨¾º¬¾º¬¾º©Áº«½¹¥Á¼¨¿¹ª¾»¬Àº§¿»«½¸«Á»©¾¸©¾º­Á·ªÁºªÁ·¬¿¼©Ã»ª¿»­Á»¬¾½«Á»¬¾»¬Ã½«Á¾­Àº¬Á¼¬Á¼«Ä½«Â¿­À½­Ã»®Ã¿¨Ã¾®Ã»®Å¿¯Ã¾«Ã½®Ä½­Ã¾«Â¾®Æ¾°Á¾¬Ã¾²Á¾¬Ä¾®Ã¾«Ã½­ÄÀ¬Ã¾­Ä¾±Á¾°Ã½®Ä¾¬Ã¼®ÆÀ¬ÃÀ¬Æ¿°ÃÁ¯Á¿°ÄÂ°ÃÁ®Ç¼²Ä¿¬ÁÃ¯ÆÂ³Ç¿­ÃÁ¯ÃÁ³ÇÀ²ÇÃ²ÄÂ±ÄÁ²ÈÃ²ÂÀ²Å¾¯Ä¾±ÅÁ²Æ¼¬ÆÄ³ÄÀ°ÆÀ²È¾°ÆÁ³ÃÀ²Ã¾®ÁÃ°ÅÁ³ÊÃ²ÆÄ²ÆÃ±ÅÁ±ÇÃ·ÆÃ±ÈÁ±ÅÁ®ÂÁµÈÄ±ÇÁ°Ä¾¯ÆÀ³ÆÃ²ÇÃ²ÆÂ±ÉÅ®ÉÁ³ÅÁ°Ç¿³ÆÁ°ÇÄ³ÇÀ®ÃÂ®ÆÁ­Æ¾­ÄÁ®Ä¾®Â»­Ã¿°Å½°ÅÀ¬ÆÀ«ÁÀ®Ä½«ÃÀ®Ã¾«Â»¬Ã¼©Â¼®Á¾¬Ã¹©À³¨ºµ§¾¶¥º²¡¹§¯ª¬¡§¥¡{ol~ilntuogw`t_~k_{k[zob~t_r]u]|n_q[rYoU{nYznUq[t[|q`w_z_rbzgz`w]q`t`td|gwi||gnwogzdk`|g]~k`~qboY|qY{oYxnUtoWufQobMq`MiYMi[DfUMgUIfSFlUDdUDbQIiSF`UIgODbOIbSDgQIbUKdSB`OIdOI_SF`MIfYIfYI`UIfUIiWIbUDbYOgUDg[OndUi_On[Kk_Uk[Kn_Qn[Qn]IfWKiYOnUIk]MlYMkYKk[IkYKn]Mk_Qk_QgdOo`Ml_SofQq_QldQrbStfYqoYun[wo[{q`{g]~kW{k`zob|td|fgzilwtzd~r`|kY{]Mt]MnWFlYMn]In[Kl`UndWrkQtdQtf]xik ¡¹°²À¶ÀÆµÃÃ³ÆÁ¶ÆÇ·ÊÈ·ÆÉµÈÊ²ÆÃ±Æ¼®ÄÂ±ÆÆ·ËË¹ÈË·ÈÅ·ÈÇ¹ÈÊ·ÉÊ¸ÌÊµÈÈ·ÌÊ¸ÊÈ¸ÊÇºÊÌºÎÉ½ÎÈ·ÊÊ¸ÉÇ¸ÊÌ»ÌÈ¶ËÇ´ËÊ¹ËÈ¶ÊÊºËÇ·ÍÈºÉÆ¹ÊÈ·ÈÃµÆÈ·ÈÇ¶ÊÈ·ÊÇ·ÈÈ¸ËÆ·ÊÆ´ÈÈ³ÊÃµÈÇ·ÊÅµÊÃ³ÇÆ·ÇÄµÉÆ¸ÉÆ¶ÊÇµÊÈ¶ÉÆ´ÉÆ¸ÈÆºÈÇ¸ÊÈ³ÇÃ³ÇÇ´ÇÆµÊÇµÈÇ³ÊÆ·ÆÅ·ÊÅ´ÇÆµÆÄ·ÈÄ¯ÈÄ´ÈÄ¶ÅÆ´ÊÇµÇÄµÈÄµÇÅ³ÈÅ³ÆÅµÊÃ³ÉÄ·ÇÁ²ÆÄ´ÇÁ³ÊÃ³ÊÃ²ÆÄ´ÇÆ·ÇÄ°ÈÃ³ÅÀ°ÃÄ³ÆÃ²ÅÂ²ÈÁ²ÇÀ³ÄÃ·ÆÀ³ÈÂ®Ä¾®ÆÄ³Ã¿²ÆÃ´Ä¾¯ÆÁ²ÆÀ±ÅÁ­Ä¾°ÅÁ´ÆÁ²ÅÄ±Å¿¯ÁÁ²ÃÁ²ÅÃ°ÃÁ²Æ¿°ÄÂ³Å¾³ÆÀ¯Ã¾±Ä½®ÂÀ²ÅÁ°Ã½´Ã¾°ÃÁ¬Å½±Ã¿²Ä¾®À¾°Â¾°Ã¾°Â¼²Ä»®Á½²Ã¾®Â¾°ÃÀ®Âº®Á»­ÆÀ®Â»®Áº±Ä¼¬Ã¾®À½«À¿®Á»­Âº®¿¼­Á½«Á¾²Á¼¬À¼¬¾¸«Á»®À¼ªÁ»¬½½®¾»«¿½«À»ªÁº«À¹¯¿½¯À»«¾¾¯¿¾°Ãº«Àº«¿¹¯¿½¬¾¸¬¾º«À¹®¼¾­Á»¬¾»­À¹©¾»®Á½®À»¬½»®Á»¬¾·¬¾½«Àº¬¿»¬Á·«¿¼­Á»ª¾º­½¼ª¾º¬¾¹¬¾º«½¼¯½»¬¾¸ª¼¸¬½»«½¹¬½»ª»¸«»¸¬¼¸ª½·«½·©»·«¼»¬»¸ª¾¸¯¾¶«»´ª¸·¬»º«»¶«»¶©¸·¥¿³¨»¶¥¹¶«»µ«»µªºµ©··«½¶§º¸«»¶§»·¨¸·¨º¸«»³¬¼·¥º´ª·¶«½¶§¸µ§¸µ«¸¸«¹³§º¶«»³§¹¸©·­¥²µ©·´¥·³©¸³§·µ¦µ·©µ³¤·¸¥·µ¥µ³§¶µ¤¸·¨´³¤¸¶¢µ·¦µ¶¥¹´¢··¥³´¢¶³§¸·§··¥·µ£¶¶©´µ¤¹¶¥¹·¦º¸§µ´¥¸¹©¸¶ª·¶¤·¹¨»¶¥¹¸§º¹¦º·§··¤º¶ª¸º¬º·¦¸·§»·­»¶¨¹¸¦¼¸§¿¶©·¹¨º¹¨½¹«·»¦¹·©··ª¼¸ª»¸ª»¸¨¾»¨»¹§»¹¨¹»«»»«¾¹«¹»ª½¹©»º«½¹¬¿µ¬¼¹©¾»«½»¬½¼¬¼º¬½»¬¼½¨¿¸ª¾»«»¾¬¾¼°¿»®Á»¬½¾­À½ª¿À­¿¼­À¾¬¾½©¿¾¯Á¹¬¿»­¿¼¬¾»¬½¾°»¿ª¾¾­¿¿­Á¼®ÁÁ¯¾½®À¿¯À¼¬½Á­Ä¾­Á¾°À¿¬¾¾­Á¾¯Á»¯Á¾«ÁÁ³¿À¯Ã¾¬ÃÀ°Á¿±ÅÀ®Â¾±Ã¼«¾¿°Á¿¯Ã¼¯Á¾¬ÁÁ¬ÃÁ°Á¾®ÂÁ°Á½¯ÂÀ³ÃÀ¬ÁÁ®¿¾®ÅÂ³Â¿°ÃÀ´ÃÂ¯ÁÄ®ÃÂ³ÂÂ³ÅÂ±ÃÁ´ÇÁ²ÃÃ³ÂÁ³Æ¿³ÄÅ³ÄÁ´ÆÇ²ÅÆ°ÄÁµÅÄ±ÅÃ³ÅÆ³ÆÀ³ÇÁ³ÆÈ²ÇÃ´ÆÃ³ÅÆµÅÃ³ÃÄ¶ÆÃ´ÁÅ³ÈÁ´ÈÃ´ÃÃ´ÅÃ´ÇÅ´ÅÆµÈÆ±ÄÅ´ÈÁ³ÅÂ·ÈÅ¶ÄÅµÉÇ·ÅÇ³ÇÆµÈÅ³ÄÇ¹ÅÈµÇÇ³ËÆ¶ÆÈ³ÊÃ¶ÆÃµÇÄ´ÈÆ´ÇÈµÇÆ³ÈÄ¶ÉÇµÈÇ·ÆÈ·ÈÄµÇÇ³ÅÇ¶ÌÈ³ÇÆ³ÇÆµÈÆ³ÈÆ·ÆÆ³ÆÉ³ÈÈ·ÈÇ¶ÇÇµÊÉ¶ÈÈ¶ÊÆ¶ÆÊµÈÇ·ÉÅ·ÈÈ¶ÈÆ¼ÇÈ¶ÈÇ¶ÆÊ´ÉÈµÇÈ¸ÉÆ³ÈÆ³ÇÃ³ÄÆ²ÈÅ³ÄÂµÇÆ´ÆÅ³ÉÃ®ÆÂ³ÅÁ³ÃÁ®ÃÄ®Ä¿­ÂÀ°ÁÀ¯ÂÃ®Á¿¬Â»¦¿·¥¾¸ªº½«ºº¦¶·¡³¬¬¤¢ xonntuzzui{gt_q[|rf~{b~ifzif|`~xfw_~t]zbzd|fklollnlniiklquqrtlif{f{zg~{k~k|zizi|~dxx_xn[tgWtdWl`SlfOl`QkfOi]Qg_Qi]K`]Un[Mb_Od[MfYSd[Mf_Qi[Od]Ib`Qg_Kb`QdYOd_Md`MlbWb[Qk`Si]QibWfbQidWkn_loWnnWli`riYon_lgYtfQkiWifSniYkgUkdYgfSkdWndWliUkkUlgYoiSlfYlk]ql_rl[nq]wiYrn_qnbxz`|{fz{i||lz`|~i{zi~{iqxx{~uqfo]zlWqfOr`YliSrfUkd]olbqi]rlYoi]urfxt´¨­À¶»É¹ÃÊµÈÇ³ÆÊ¶ÆÉ¹ÈÈ»ÊÊ»ËÊ¼ÊÊ¶ÊÆ·ÇÂ¶ÆÆ·ÉË¸ÈÌ¾ËÐ»ÉÎ¼ÍÎ¾ÎË½ËÎ½ÌÍÀÌÍ¾ÍÍ¿ÎÐ»ÍÍ¾ÎÐ»ËÍ»ÍÍ½ËÌ¼ÐÊ¾ÌÉ»ÍÎ¼ÊÐ»ÌÎ¼ÌÌ»ÌÌºËÌÁÌÐºÏÊºÊÉ¼ÌÉºÊÌ¼ÌÌ¿ÌÌºËÌ·ËË»ÎÌ¾ÌËºÉÊ½ÊÉ»ÊÎºÊÊ»ÊÊ½ËÌ¶ÌÌ¼ÊÉ¹ÈÊ»ËÎ¼ÈÊ»ÌÌ»ÊË»ÌÉ¸ËÊºÊÊ»ÌÈ¸ËÌ»ÊÊ¸ËÈ»ÉÈ¸ÈÊºÈÊ¸ÈÈºÊÆ¸ËÊ·ÈÆ»ÊË·ÌÈ¸ÈÉ¹ÉÈ¸ËÉºÊÈ¹ÇË¼ÈÊ¹ÈÇ¶ÈÆ¸ÇÌ¶ÊÈ·ÇÈ·ÆË·ÆÇ»ÊÈ»ÇÇµÉÊ¶ÈÈµÇÈ·ÆÈ³ÃÆ·ÈÈ¶ÈÇ·ÆÆµÇÆ·ÉÆµÇÆ·ÆÅ·ÉÇ·ÈÆ·ÆÆºÈÆ·ÈÅ¶ÅÅ·ÆÈ¶ÆÅ¹ÈÆ¸ÆÈ¹ÆÆ·ÆÆµÆÃ´ÃÆ·ÃÆ·ÆÆ·ÆÆ´ËÄµÈÃ´ÄÆ³ÄÅ³ÆÃ¶ÆÇ´ÅÃµÃÂµÁÃµÆÃ²ÁÁ³ÃÃ´ÃÂ³ÄÄ³ÇÁ´ÅÃµÃÃ³ÂÃ³ÄÁ³ÃÀ´ÂÆ±ÃÂ´ÃÀ³Ã¾´ÂÃ²ÃÂ²ÁÃ³ÂÄ´ÃÃ³ÃÃ¯ÁÁ³¿Á´ÄÁ³ÀÂ³ÃÂ´Å¿³ÁÁ±ÂÁ´ÀÀµÂÁ±À¾³ÁÁ°¿¾³Á¿´Æ¾³ÅÁ´Á¾µÁ¾¯ÃÃ¯ÃÀ³ÁÀ³ÁÂ®¿Â³Á¾²Á¿°ÀÃ²ÀÀ³ÁÁ¶¾Ä°ÁÁ±ÁÁ±ÀÁ¯À¾³Á¿±ÁÂ°À¿³¾Á¯ÁÀ²¾Ã±À¾°ÀÁ³À½²¿Á°À¾°Á¿³¾¿±ÃÂ³¾¿°Á¾°ÀÁ³Á¾²¾¾¯¾½°»¼¬Á¾²Â¾°¾¾¯¾½°½¾°»¾³»¾¬»¿¯¾¿±¾º®¾¾°¾¾¬»¼®»¾²¾¼­¾½±¾¿¯¾¾­¾»®¼»¯½º®¹¼¬¾»®¾»¬¼¼®¹¿­¾¼­»¸¬»¼«»»±»¼®»½²¹»«½»­º¹¬¹¹¬º¾¬·¹¬»½®»¹«¹»¬º¹¬º¼ª¹¨¯­¢³®£³° ´²£µ°´®³®³´§³±³­µ³£´®¸²³¬¡·³¡¶¬µ±£¸² ³®¡·°µ±¶¯¡·¯¢·´¡·±£º¯¢¶²¡·°¡·²¦´³µ²£·°·° ¶®µ³¦·°¦³²¡¶²¥µ±£»µ¡·²§º²¤·´£·³¤·±¥¸³£¹¶¤¸²£¹´ º¯¥¸³ µµ¥¸³¢»³£¹³¥»¶¡ºµªº±¨ºµ¦·²¢¸·§¹³¢¸´¥½´¢»´¦¹µ§¾·¥»¶¦¸·£»¶§¹µ£º·¤¹¶¦½·£»·§º²§¾·ª»· »·¦»µ¥»´§¼¸§¾º§½½«½¸¦»¶ª½»§»·ª½¹¤½µ¦»·§¾º«¾¸ª¾·¨½µ«½·©¿·©¾¸§¾»«¾·©¼»ª»·ª¼»ª¾½«¿·©¾»ª¾»ª½»©¾¸«Á½¬À¸¬Á»§½º©¿·¬¿¼§¾º©À¹«¾»¥Á¹ª¾»«Á¸©¾»©Áº¬¾½¨Ã»«¾»¬Á»©Á¼®Á¾«Á¼®Ä¼®Ã¾¬¾½¬Ã¾¬À½®Ã¾¬Á¾²Á¼®Â»­Ã¾®Â½«¾»­Ã¾¬Ã¾­Ã¾°Ã»®ÂÁ°ÂÀ¬Ä½­À»­Ã¿­È½²Ä¾®Ã¾¯Â¾¬ÀÁ±Ã¿¯Æ¾¬Ã¾°Ã¿±Å¿°ÂÁ®Æ½¯Ä¿®Ä¾°ÂÀ®ÃÃ²Æ½°ÃÁ¯Ä¾²ÃÁ®ÄÁ°ÅÀ²ÇÂ²ÆÁ²ÆÁ±ÆÃ¯ÆÁ¯ÇÀ²ÃÃ¯Ä¿°ÅÁ±ÈÂ±Å¿²ÅÁ­ÆÁ³Å¿¯ÆÄ°ÅÁ²ÈÀ³ÄÁ­ÅÃ²ÇÅ²ÃÃ±ÆÃ´ÆÃ®ÅÁ°ÃÁ³ÆÃ°Ç¿±ÇÄ±ÆÂ°ÈÂ°ÃÃ³ÆÁ±ÄÅ²ÆÁ´ÅÂ®ÆÄ³ÈÄ°ÆÁ²ÆÃ³ÆÂ±ÃÃ°ÆÄ²ÇÁ²ÆÃ±ÅÀ²ÆÂ°ÅÃ¬Ä¾¯ÂÂ²ÆÂ²ÄÀ°ÅÁ¬Ã¿®ÄÃ¯ÃÁ¬Ã¾­ÃÀ¬Â¼¨À¸©Á¹¨¼¸§¿½ª¿½¥¾¼¨Â»¦¾¾ª»µ¤´¬«¡|qkingotkd~r`d]|k[zgUzlStY~r_u_~x`~q`]x_|rUu_wUt`fkqtkngiklnllodxlxg|li|kgkwbz_udztg~bz{`zw]zoYwgUt`KnYSk_Kk[In]Mn]Fk]IkWDiYDgUFiWFkWDdUFiUFdYDbYDdQF`SB`UIfOIbSD`UIiUIfSIfYIiQI`UIlUFgSKfWIf]OlbWnbSoiSodWqkYqkQtgSl]Ql_KgYMk_Kk`Og]Ok]Ii_Kk`Qn_Oo_Dn`Kl`In_QnfSqbUqgOufQogWtfStnUxq]zt_xt`zxi{u`~z_~u_u`tbwd~xdzq|r~uqtko]wgUwbYrfSt`Kq_Ql`On_QlWQnbQrdOndYukYuz°«¬Ã±¼È³ÄÆµÆÇ²ÅÆ²ÇÆ°ÆÄ´ÇÅ³ÇÆµÆÄ´ÆÁ®Ã½¯Ä¿¯ÃÅ³ÆÇµÊÈ»ËÈ¹ÈÈ¸ÉÌ·ÊË·ÉÈµÌÈ·ÊË»ÊÈ¹ÌÈ¸ÊÊµÉÈ¸ÊÉ¼ÊÈ¹ÌÈ·ÈÈ·ÊÈµÊÆ·ÈÄ·ÊÈºÏÆ¸ÈÆ¸ÊÇ³ËÊ¶ÈÈ¸ÊÇ¸ÊÆ·ÊÆ¶ÈÇ·ËÆ¶ÇÊºÆÅ´ÈÇµÇÈ³ÈÇµÈÇ¶ÌÇ·ÆÆ·ÊÆ³ÊÈµÉÆ´ÈÈ¶ÊÆ´ÆÆ¸ÈÆ·ÇÈ´ÉÆ·ÈÄ¹ÆÈ´ÅÆ³ÊÆ·ÆÆ³ÈÄµÇÄ¯ÆÆ´ÅÅµÈÇ¶ÈÃ³ÆÅ´ÈÄ´ÈÅµÆÃ´ÆÆµÉÈ´ÉÄ¸ÇÄ´ÄÂ´ÆÆ·ÆÂµÇÃµÇÇ²ÃÃ¶ÅÆµÇÄ´ÆÃ³ÇÃµÈÁ³ÈÁ³ÅÁ²ÇÁ³ÃÁ®ÆÂ³ÆÂ±ÇÁ´ÆÀ±Ç¾´ÃÀ³ÃÂ±ÂÁ±ÄÃ³ÃÁµÆÅ¶Æ¾³ÁÄ³ÇÁ°ÄÁ´ÄÁ±Ä¿°ÆÀ³ÃÄ³ÃÁ±Æ¿°ÄÂ±ÅÃ³Ã¿¯Ã¾®ÃÀ±Á¿°ÃÁ³Â½¯ÁÃ²ÂÂ¯Ã¾¬ÄÀªÀ¾ªÁ¾³ÁÁ°Á¿°¿¾°ÁÁ±Ã¾®Å¾®Ä½°ÁÀ­Ã¿¯Â¼®À¾­À½¯À½¬Â»°»»®¾¾­Ã½¯À»­Æ»­À¾®Á½¯Á»«À»°Á¼¯¾¾°À½¬¾¼°¿»­Á¼¬¾¼¬Á»¯¿º¬À¼¬¿¸®Àº¬¿½­¿¹®¾»®¾¾¬À»­Ã»¯Á½¬¾º­Á¾­¿»®¿»«¿½¯À»¯¾»¬¿º¬¾»®¿¾¬½¹®Àº­¾»«½¼¬À¾¬½¹ª½»°À¹¬¿¹¬½¸®Á¹¬½»«Ã·¬¾º¬¿»«»º®½»®¾¹©½·¬¼»¬¾¹©½¸«»¸­½»©½¼¬»¸ª¾¸ª¼º­¾¹«¾º§»¸§»»©¸·§»¹ª¸·«»¸¯»·©»·©¼·©»¸«»¸¨½·«¸¹§ºµ©º³©º·¨º¸ª¸¶¬»µ¦¹³¨··¨¹·©»µª¸µª½·©º¶«¸´¨¹¶§º´£··¬·³©¹·§¸µª¹·§º¬¡­´¤µ³¥¶³¥·¶¦º¶¦³¸¥¼µ¤·³¥´·£³·£·³¤·¶¤¸¶¦¶·§¹¸¨·µ©¶µ£·µ¥¹·£¸³§µ· ··§¶´§µ¸¨¸¸¨¹´§¶¶¢´µ¥¸·§·¸¦·¶¨µ¶¨¶¶§¹´«¹·§·´¥º¹¨·¹«¸·©»·¨·¸¦¼¹§¹·©¸·ªº·¨¹¹¨¸º¬»´©»»¨·¹«º¶©»¸«¹¹©»¹¦½·§»»¨»»ª¾¹©¼»ª»¸¦»½ªº»ª¹¹«½ºª»ºª»¼¬»¼ª»»¬»º¦½¼¬¾º¨½º©¾¹ª¼¼ª»º¬»»«½º«»»§¼¼³¾¾§¾¾¬¾¼®Á¼¬»¾¬¾½«À½¯¾¾®½½¯¾»¬¿¼¬¿¾¬¾»¯À»¬¾¼¬½¼¬¿¾¬ÀÁ¯½¾¬Á½ªÂ»¯¿½®¾¿°ÃÀ¯Á¾¬ÁÁ¯Á¿°¿½¯Ã¿­À¾¯ÀÁ°Ã¾¯Á¼±ÀÁ¯Á¾°Ã¾°¿¾­Á¾°Á¿­¾À¬Ä¾¬Á»®ÃÁ±À¼­ÂÁ®À¾°Ä¿®Ã¾¬Ã¾²ÃÂ¬ÂÁ³Æ¿°ÁÀ±ÃÂ´ÅÁ³ÅÁ´ÃÀ±ÁÂ²ÆÁ±ÁÁ³ÆÁ´ÆÁ±ÄÁ°ÆÁ³ÆÃ³ÅÃ³ÇÃµÅÃ³ÃÄ°ÆÃ³ÅÆ³ÆÂ³ÆÂ³ÀÅ³ÃÂ¶ÃÂ±ÃÄ´ÆÁ³ÈÃ³ÅÁ°ÄÆ³ÄÄµÈÇ²ÇÂ´ÃÁ³ÆÃ³ÆÆ²ÈÈ³ÈÆ³ÆÆ¹ÆÅ¸ÈÆ³ÉÃ¶ÇÃ¶ÇÆ³ÈÄµÅÆ·ÅÆµÇÆ·ÈÆ·ÆÇµÆÈµÊÉ·ÇÆ´ÇÅµÅÅ²ÇÈ·ÇÄ´ÈÆ·ÊÆµÈÈ¸ÆÃµÇÄ³ÇÆ´ÈÆ´ÈÃ³ÈÆ·ÇÈ¶ÇÊ·ÈÈ¶ÉÆ³ÆÅ»ÆÈµËÊ¶ÈÅ¸ÆÈµÆÈ´ÈÇ¶ÌÈ´ÇÈ¶ÈÊ¶ÈÅ´ÈÃ²ÆÆ²ÇÇ¸ÆÇ³ÆÈµÈÇ¹ÈÉµÇÈ·ÊÈµÇÈµÅÄ¶ÆÃ¶ÆÆ´ÄÅµÆÃ³ÃÃ²ÃÃ°ÃÅ³ÁÄ±ÆÇ±ÃÃ°ÄÂ®ÁÄ­ÅÃ¯¿¿®ÀÂ³¾»±¹»¢µ²¬ ¢|wuxxwunog{l]iY{q_{{b{`~dzi|`iinoligruxwwzwuuwuwuuxlolwuoorl~fi|zfz{izzk{tdzq_wq[xqUwiYrn[rl`ur[nnWunUngSofUlbUkdSi_Oi`OkbQi_F`]MdbKdYOf_Sf[Qg_Sb[Qg_Qb]SifSi_UgbQk_Qn`Qi`WlfYkq_llbnq_rwixitx_rk]tgWoiYk`[kgQkfWi`YnfWobSkk]llUtnWqn[ogYuq[qrWuq]zq[ulYwf_uk[wo[qngxzb|l{i~|f{qikkzlkzkntu|xk{f|qbxu`xo[ogYrbOkdUq`Wnf[qfSiiWoi_wud¤ ¥·¯´Æ·¿Ê¸ÆÊ»ÆÍ¼ËÎ¼ÊÌºÌÉ¹ÊÐºËÎ·ËÊ¹ÊÉ´ÈÆ²ÆÁ´ÆÅ¹ÇÊ¹ÇË»ÈÍ¼ÌÌ¹ÊÌºÊË»ËÊ»ËÎ»ÏÌ¼ÌÎ¼ÌÏ»ÍÐ¾ÎÊ½ÌÏ¼ÌÐ¾ÌÊ¾ÎÍ»ÌÌ»ÍË»ÌÌºÌÍ¹ÌÍ¼ÌÌ¸ÏË¾ÎÎ¿ÍÊ¼ÌÎ»ÌÈ»ÊÊ»ÊÊ»ÈÌ»ÌÉ·ÈÌ»ÈÌ¹ÌÌ»ÌÈ»ËÊ¸ÇÌ¼ÍÈ»ÌÈºÌÌºÊÌºÌË¸ÈÈºÈÈ»ÆÌ¶ÌË»ÇË¹ÇË·ÈÆ·ÉÇ¼ÉÈ¹ÊÊ»ÉÌ¹ÊÊ·ÉÈ¼ÉÈ¸ÈÌ¸ÆÊ¹ËÈºÉÈºÊÊ¼ÌÈ»ËÊ»ÇÉ¸ÊÉºÈÈ¸ÆÇ¶ÈÆ·ÈÇ¹ÇË·ÈÉ¹ÆÇ·ÆÉ¹ÇÇ»ËÈ´ÈÅ·ÇÈ¸ÇÈµÇÆµÇÃ¶ÈÆ·ÇÆ³ÆÄ³ÈÄ¶ÈÆ·ÃÆ¶ÇÆµÈÅ·ÆÉµÉÃ¶ÆÆ¶ÆÆ¸ÄÆ¹ÈÅµÈÃµÅÇ²ÇÅ¶ÈÈµÆÃ·ÂÇ·ÇÆ·ÈÅ·ÈÆ¶ÇÄµÃÆ·ÇÄ´ÇÅµÅÆ³ÆÅ·ÆÇ´ÅÃ³ÂÄ¶ÄÅµÄÂ³ÃÁ³ÆÄ³ÃÃ³ÅÁ·ÅÁ³ÄÂ·ÄÅ±ÅÃ³ÃÃ³ÁÁ³ÂÃ³ÄÅ³ÄÁ°ÃÃ³ÂÃ´ÃÂ²¿Ã±ÅÁ³ÃÃ´Å¾³ÃÄ¶ÃÀ°Ã¾´ÁÁ³ÃÀ®Á¿²¿Ã³ÂÂ³ÁÀ²ÃÂ²ÃÀ¯ÅÀ³Á½±ÂÀ³À¼³ÁÁ±ÁÁ±ÁÁ¯ÁÁ°ÄÂ³ÀÀ¯ÃÀ³ÃÁ²ÁÁ²ÂÁ°À¾±ÀÂ²ÂÃ³ÀÀ¬¿Ä°Â½²ÁÁ³ÂÁ´½¾µÃÁ³Á¼°Á¾³¿Â°¾Â±»¿³À¼®ÁÁ²ÁÀ´ÁÀ­¾À°¾Á±Á¾³¾¾±¾½®½¿³¿¾¯¼½¬Á¾¬À¾¬¼½­½»°¾¿²¾»®¼¼¬½À¬½¿±½»³½½²»½®½¿°¾¼¬½¾²¾¿­½½³¼»­¿¼¯À¼¯»»°»¼¬½¾¬¾»¬¼»¬»¸¬¼½¬¾»¬»¼­¹»¬ºº¬¼¹²»¹©»¹¬»·¬»¸¬º·¯»»©»½¥»¸«¸¸­¶·«»»­»º°¾¼¯»ª®¯¡¶°µ°¢µ® µ¯£´® µ°¢¶¬¡¸®µ±¶°¤³³¸° ¶­´®¡´²£·±¡³® ·¬·¯¡·­ µ°¡·±¶±¢µ²·®¶³£·­¢µ²¶°¢·² ·± ¹±¶´µ·£µ±¤¸°¡·¯¤¹±§»³¤·´¡µ±¡¸´£º²¡·²¸²¦¸¯¡¸²£·¯§·³¸³£·³¹²£»µ¥·´©¹³£»³¤»°£·´¦¹³£»³£»³¥ºµ©»´¬º´¢¹µ§½µ§¼³§º·§»¸£º¶¥¼´¥»´ª»µ¥½´¥ºµª¼¶£¾¹¦»¶©»·¢»·¥»¸¨½·©¾º§½¸©¾µ¨½µ¨»¸¥½·©¾¹ª¾·§¼·¨½¸§¼¸©½¶¨½¹«½¸§¾¼§½º¨À¸§¼¸¬¾»§»»ªÀ¸ª¿¹¨¿º¦½·ª¾»ª½º©¾¹ªÀ·«Á¸¬Áºª»º¬¾»ªÁ»®Áº¨À»¨½»¬¾»©¿»©¾º«Á»ªÀ¹®Á»¬¿¸¬¾»ªÃ¾«Â»­Á¹®Á¼«Á¼¬¿¾¬Á½¬Ã½­¾¾¬Á½¬Ä¾®ÂÂ¯ÄÁ¬Ç¼­¾»¬Ã¾¯ÁÀ°ÃÁ®Ã¾­À¿°Ã½±Ä¾°Ä¾­ÂÃ²Ã¿¬Ã¿­Ã¿®ÃÁ®Ã¿³Ã¾°Æ¾°Ã½«Æ¾¬Á»±Ã¿¬Â½­ÃÁ±ÃÁ°ÁÁ®ÆÁ°Á¾°ÅÀ­Ã¾°ÃÁ¯ÄÁ®ÃÁ³ÆÁ²ÆÁ³ÆÂ°ÆÀ°ÃÁ¯ÄÁ²ÃÂ°Æ¾­ÆÀ²ÈÁ°ÇÁ²Æ¾¯Æ¿°ÆÃ²ÆÃ³ÃÁ°ÆÁ±ÅÃ°ÅÁ´ÆÁ³ÅÅ±ÅÁ²ÈÁ²ÅÁ²ÇÁ°ÆÂ²ÆÄ°ÆÃ´ÆÁ°ÅÅ°ÆÁ¯ÃÂ³ÄÃ²ÄÃ´ÆÃ³ÅÁ³ÄÄ®ÆÃ±ÃÃ¯Ä¿²ÃÀ¯ÃÃ±Æ¿±ÃÀ°ÄÀ°ÆÂ±ÆÃ²ÃÂ°ÆÃ«Á¾¬Ãº­Ãº«À¼­ÃÀ«ÃÁ®ÃÀ«ÂÁ®Ä¾²Ã¾¬Á½¯Á¾¬À¼«¿»§¾»¥¸µ¢±©«§ ulqzql|qn`|x_tY~iYwdOwnYtuY|zYn`x_|~`~g~fxdwfkzgzfnktrtokqqlknqn|n|knii|lwizktlbzd~td{wbzqbxgWxkStkWt`UtgWtf_uq[wdSrgSqgSqdSqbOtdOoYIl[IkYMi[Fg[IdSDbSFgQFdOIdQIgQDbMIbQI`UIfQFgWB`WFdWMgWOf[IfYOl[Mf]UikYngYqn]ow`wt`rnStdUrfQl]Ml[Ii[Ii_Mg`MiYKl]Qk_QofSndOogQrlSroQol[tnWurY{oY{iQziUzbSxgUwlYun_xr_zxd||fzd{gfx`zb|wg{b~|kul~lro~bu`|g]tbOu`QoYMn[Ik[MkYKn]Mo]Ko`UqiUtol­«·¬·À°¾Â·ÀÆ´ÈÇ·ÈÆ¸ÈÊ·ÊÄ¸ÆÈ·ÊÈ¸ÊÈ·ÉÊºÊÇ¯Ç¿¬ÅÁ³ÊÆ²ÆÁ³ÇÅ·ÈÇ»ÊÈµÇÈ¸ÈË¶ÈÆ·ÈÇºÉÈ¹ÈÈ¸ÊÉ¸ËÈµÊÊ¹ÊÊ»ÇÇ»ÈÆµËÈ·ÊÇ»ÉÇ¸ÈÆ¸ÊÇ·ÈÈ¶ÊÇ¸ÉÈ·ÈÅ¸ÊÆ´ÇÂ¹ÊÈ¶ÊÇ´ÊÈºÈÉ·ËÆ´ÆÆ·ÇÇ¶ÇÈ¸ÊÄ·ÊÄ·ÊÆµÊÇ³ËÅ·ÆÅ³ÅÈ¶ÊÆ³ÅÈµÊÆ·ÈÅµÈÆµÊÆ¸ÉÄ´ÇÅ·ÆÃ°ÇÅ³ÊÄµÇÃ³ÈÃ·ÈÆ¸ÆÄ³ÇÃ³ÆÄµÊÅ¸ÆÆµÈÃ²ÉÂµÇÄ¶ÆÁ²ÅÅµÇÅ³ÆÄ³ÆÃµÇÃ³ÈÁ¶ÉÂ¶ÊÂ²ÆÁ³ÆÃ²ÃÂ³ÆÀ±ÅÃ³ÇÁ°ÈÀ´ÆÁ¯ÇÃ³ÃÁ³ÆÀ±ÄÀ³Ã¿²Ä¿³ÄÁ°Æ¿²ÂÀ±ÉÄ°Ç¾²ÃÀ³ÄÄ³ÆÁ´Ã¾´ÆÁ°ÃÁ´ÃÂ°Ã¿®ÃÁ³ÆÀ²ÃÁ³Ã¿°Â¿²ÆÂ´ÄÀ±ÃÀ±ÁÁ±Á¿²ÁÀ±Å½¬ÂÀ®À¾³Ã¾²Ä¾®Ã¾­ÁÀ³Ã¾²À¾±Ã¾«Ã¾±Â¾®Á»±Á»¯ÁÁ¯¾½¯À»¬¾¼¬Â½­¾¾­À¾®Á»«À½¬À¼¯Á»°Á¾®ÁÀ¬Á½­¾»«¿¾¯Â½­Ã¼¬¿¾­¿º®¿½¬¾»«Á»®Á¾¯¾¾¬Á¹®À»®¾½«¾»«¾¹®À½®Á¹®¾¼°Áº°¿Àª»»­»½°Á¾¯¾»«¾»¬¾»¬Àº®Â¸¬Á»¬À»¬½¹«Ã¼­À¼«À¸¬¿»¬¿º¨¾º«½»­½º©¿»«À»©½º®»º­¾¶­¾»©»¸«½·§¾·ª¾¸«½¸«¾¸«¼·¬º·«º¸©»¸¨»º¬»¹©½¸ªº¸ªº¶«»¶§½·«½·«½¸©¸µ«»¶§»µ©º¶ª½´§·¸ª¸´ªº·¬»¶¨··¬¹³¨º¶¦¸´§¸·©··«¸´¦»µ§¹³©¹µ©¹µ¤»³¤»³¨·¶¦º³§·µ¨·´©º®¦­³¢µ³§¸¶¥µ¶¦ºµ§³·£·µ¨¶µ§¸¶¢¶·©·²¥¹·¥·µ¢¶´£¶³§»³¦¹µ£¸³§¸·¢µ²¦¹³£´¸¦º¶£¹³¦··¨¹´©¸µ¤º³§·¶§¸¶«¸¶¥¸´¦¹¶¨¸·©º¸«¹·¤·¶¨¼»©»µ§·¶¬»º¬¹µ§»º¨¼¸£¸¸¨¸µ«ºº¥¸·¬»º¨µ¸¥»¹§»·¥¹·ª¼¹©»¸©º¸¥º¼«»¶ª¾»©¾¹©¾»¬»¸®½»©¼¹ª½¶¬»¼®»·ªºº¬¾»©½¼®¾»«½º¬»¾­¹¸©¾»¬»»¨º¼¬»¾¬½º¬¼º®»»ªÁ¿¯À»­¿»¯¿¿­¾»¬Á»ª¼½©¼¾¬¿¼¯¿¿¬¾»¬Á¼¬¾¼¬Ã¾¯¾½®ÁÀªÁ»©Á¾­¿¾¬¿¾­¼¿­Ã¿­À¾°ÂÁ¯Á¿¬À¾¬¿¿®Â¿¬À¾­Á¾±Ã¾¬¾¿°¾¿±ÂÁ¬¿Á®ÁÀ®Á¾­Â¾®ÀÀ¬Â¿°ÃÀ®ÂÀ¬Á½°ÄÁ­ÃÁ®Æ¿®Â¿¬ÀÀ±ÆÃ±Ã¾­ÅÃ°ÁÀ²ÄÂ²ÁÁ±ÄÁ¯ÃÂ³ÃÀ³ÃÁ³ÃÁ²ÃÀ¯ÂÃ³ÆÁ´ÆÃ°ÃÃ°ÄÂ´ÃÅ²ÆÃµÇÃ³ÅÃ³ÆÂ±ÅÅ¯ÃÃ¯ÂÃ³ÆÅ³ÆÆ´ÆÅ´ÇÆ¶ÈÃ³ÃÅ²ÆÃ·ÅÃ´ÆÂ¶ÄÃ²ÅÅ´ÇÆ¹ÅÄ³ÈÆµÆÈµÇÂ³ÊÅ¶ÇÅ±ÃÇ¶ÈÆ·ÊÁµÈÆµÆÆ´ÈÅµÈÅµÇÇ´ÈÅ³ÈÇ´ÇÃµÈÆ´ÈÈ³ÈÈºÆÆ¶ÈÆ·ÆÆ´ÈÆ¶ÈÈµÈÆ´ÇÆ´ÈÇ¸ÈÆµÅÅ¶ÆÆ¯ÇÇ·ÇÃ¶ÈÊ´ÆÆ´ÇÆ·ÈÆ±ÇÇ³ÆÆ·ÇÅµÅÅ¶ÅÊ¶ÊÆ´ÇÉ¸ÊÄ·ÃÆ³ÈÇ¸ÆÈ¶ÊÇ³ÈÆµÅÄµÈÃ³ÈÄ³ÃÄ³ÆÄ³ÇÆ±ÃÁ¯Ç¾¯Â½±¿½®ÆÁ±ÁÃµÄÆ³ÂÇ·ÃÅ³ÃÁ¬ÁÁ¬Â¿±¾»­½¾¬º¾ªµ³®¦¨un{wok|g~fxgzxdq_q[{r_zr`wd{ikikllllnkn~xwqiunzgolnrturnoxuouikwlug~uk~rbxt`{o`xk_zo[zq`xq`x{k{kg~udzrb{w[wo]ui_rlWo`UngUffQk`SgdQi`UkbSfdQg`SkdSd`Ob_Ok`OdbSgYMd`MbbQi_Si`Qk_Wgi[gfWlbWnn`nndtwirorugux`uq]xiSnfUldUiiUodUkgWgiWn`UlkSni_qiWokWro`wt]u|dzd|oofwf|l`~n_{rbzwizzf{|ltnuroonqrtu{zuqi|rY{o]un[riUnfSl`SldWkiOnbYqiYrn`|©¥»¯®Æ³¿Å¹ÁÈ´ÅÈ»ÈÈ¼ÆÐ¼ÊÌ¹ÉË»ËÌ»ËÈ»ÌÌ¾ÎÌ¾ËÊ·ÈÆ·ÈÇ·ÌÌ¶ËÌºËË»ÊÊºËÎ¼ÌÍ»ÉÌ¼ÌÎ¼ËÍ¿ÍÍºÊÎ»ÍÌ¼ÍÐ½ÌËºÍË¾ÌÎ½ÉÌ»ÍÊ¸ÊÌ¹ÈË¼ÌÊ½ËÍ»ËÌ¾ËÊºËÌ»ÌË¹ÌÉ½ÌÉ¹ÊÎ¹ÈË»ÊÌºÌÏ»ÉË½ÌÌ¼ÊÍ¼ÊË»ËË»ÌÌºÊÊ¹ÌÌ»ËÊ¹ÊÈ»ÊÉ»ÈÌ¹ÊÌ»ÇËºÉÊºÊÇ¸ÆÆ¸ÊÊ¸ÈÊ»ÈÇºÉÉºÊÈ´ÉÈºÈË¶ËÊ¹ÌÌºÍÆ¸ÉËºÊÈ¶ËÈ·ÈÈ¹ÆË»ÈÈ·ÈÇ·ÉÇ·ÈÆ·ÊÉºÆÇµÆÆºÈÊ¹ÉÊµÇÈ¶ÅÆµÄÆ¶ÈÆ¹ÌÆ·ÈÇ³ÇÉ¹ÉÉ·ÆÈ·ÄÄ¹ÄÆ·ÊÅ´ÇÄµÈÆ¶ÅÈ¶ÈÄ³ÆÄ·ÈÅ·ÇÆ»ÆÈ¹ÆÄ¶ÇÅ´ÆÅ·ÇÄ³ÈÅ·ÅÆ³ÇÆ·ÈÅµÇÃ¶ÅÃ³ÃÇ·ÃÃ·ÃÆ³ÄÄµÃÆµÈÅ´ÆÆµÇÁ¶ÄÃ¶ÄÃ´ÆÂ³ÄÂ³ÃÃ®ÅÅ²ÅÂµÃÁ³ÂÃ·ÃÄ³ÄÃ³ÃÄ²ÃÂ³ÅÁ³ÃÁ³ÁÁ´ÁÅ¯ÂÄ³ÃÃ³ÁÁ´ÁÄ³Á¿³ÅÁ°ÁÁ³ÁÁ³ÅÃ±¿Á³Á¾³ÁÂ±ÃÀ³ÃÂ¯ÄÂ±¿Â±Ã¾µ¿¿±À»±À¾°Â½¶ÀÀ°Â½®ÁÁ±ÂÀ±ÁÁ±Á¾¯Á¿·¿Á´Á¾±Á¾·ÁÁ±ÁÁ´À¾³¾Á°À¿¯ÂÁ³ÁÁ±Á¾³ÂÀ±ÁÁ³¼Á±Á¾²¿Á°À¿³¿À²Â¼²Á¾¯Á½¯¿¿°¿¿°À¿³¾À²ÃÁ±¿¾¬À¿¯¾¿³Á»¬¿¼¯¾Á¯»¼°¾º±¾¾®¼¼±º¿¬¾¾¯¼¾°½»¬¾»¬¼»¯»»¬½·¬º½®¼»¬¼»¯½»©º¼°½»­»»²¹º¯¾¾¬¼»®»¹­¼º§º»­»¼¬¼¹­º»¯»¹¯º»¬¼¹«»»¬½·¬¸¹§º¹¬¹¹©·º¬¸º«»¹¬¼¸¬»»®··ª¹§®±´®´° ¶­¢³­±¯¡¶°£³³³¬³¯³­ ´±¢µ®¡³¯³¯¡·¯µ±¡µ°³±¤³° µ°¡µ°¡¸´¥¸µ£µ¯·¯´²¥·³ ³² ·¯¡µ±¡·±£·³¤·²£º°¦¸°¡´²¢·²£¸³¥·³ ¹´§·³¤¸²£·²¢¸³£¶²¢¸²¦»³§¸³¦¸±§»¶§·µ£·³¨·³£¸±¤¹¶¥»µ¥»³¥¸µ¨¹³¥º·¤¸¶¥»·¤º¶¥¹¶§»¶¦»·¦»·¦»³§»´¥»·¥»µ¤ºµ§¼µ§¹·¨¿¸¤¼³©¸³¥»·ª¼·ª¾¸¦¾·©½³§¼¹ª¾º¦¾·¥¾¸©½¹ª½·«¾¹ªÁ»§»»«¾¸¨½¸«¿·©»»©½¸§¾·§¾º¬½·¥¿¸©½µ©½¹«Á½ªÁ¹¬½·«Â¹ªÀ»¬¾¸¬¾»§¿»«À»«¾·§¾¸©¿ºªÁ»ª¿·¬Àº§À»ª¾¹¨À¸¬Á¹«½»­Áºª¿¸¬¼»«¾»«Á»«¿¾ªÁ½­Á»«À¾«Á¼­Å¼¯¿¾®Â¾¬À½°Æ¾¨Á½®Á½®Ã»©Ã¾­ÁÁ«ÂÀ¬Ã»«Á½­Ã¾¯ÀÁ²Á»¯ÃÁ¬Á¾®Á½¯Á¾­Ä»­Â¾°Ä¾°Å¾°ÁÀ¯Å¿®Â¾¯Ã¿®Ä½±ÆÁ±ÅÂ±Á¾²Æ¾³ÄÀ®ÃÁ²ÅÁ±Ä¿²ÄÁ²ÃÁ²ÈÁ³Æ¾µÃÃ°ÆÀ³ÃÂ±ÄÁ°ÅÁ±ÄÂ²ÈÁ±ÄÂ³ÆÁ²Å¿°ÄÃ³ÃÃ¯ÆÁ²ÇÃ°ÄÃ°ÈÂµÆÁ²ÈÀ³Æ¾³ÆÀ±ÄÂ±ÅÃ³ÆÂ¯ÃÁ³ÆÆ²È¿¬ÆÃ­Å¿¯ÃÀ¯Æ¾²Ã¾°Ç¾®Ä¾°ÆÁ³ÅÁ¯ÃÃ­Ã¾¯ÄÀ³ÇÁµÆÃ´ÅÃ·Æ¿³ÈÀ¬ÅÁ°ÄÁ®ÆÁ²ÃÂ¯Ç¿®ÃÄ®ÃÁ¬ÃÁ©À¾¬À»¬½½­Á¾«½Â®Â»«Á»ª½»¨½¾«»¾§¸³£³©«~q|dg~kfzgubz]udlUnW|fSugStqUwqY{q]{]|`~d{b|b~kigk{fnoqndlg~k[qYo_{t`udwkki{ki{lzo~qi{ixlzkzb|n_l[{kY~nUxgQxkYxk]{q_{t_{w_wdwixqbzkWulWwlYt`Uq`SibMo[Ko]KiUOiYIiUKb]KgdOiYKfYIfSIdUFfQF`QIdYIdQIbUKdUDiYMdYMiWQdbQgdOi_WobUkl`ttfuzdtudtkWwdWobQq`Qn`Ii]MnUIiWFfYDkYMg[Ml_Oi`KodMkdSqgYrk]uu`zzk~wxgw`n]{l_zn]zq`wrb{td~tnnto|fxi{i~rk|qowrnzgt]~fWu`YrdQr_Mn`KnYIl]Qk`Oq]MqdUwigz° ©¸³ºÁ±¾Â°ÁÁ®À¾±ÃÁµÆÈ¸ÈÅ¹ÉÊ¶ÈÊ·ÊÆµÈÆ·ÉÌ·ÈÆµÇÃµÄÃ·ÇÈ´ÉÇ³ËÇµÊÃµÉÆµÊÉ¸ÉÆµÇÇ·ÈÅ´ËÊ·ÊÆ¹ÊÅ·ËÇ·ÆÈ·ÉÇ¸ÊÉ¸ÊÈ¶ÆÇ·ÈÅµÆÆµÉÆ·ÊÆ·ÊÇ¶ÊÆ·ÈÈ¸ÌÆ·ÈÆ¶ÈÆ¶ÉÈ·ÈÆµÈÆ´ÈÄ·ÈÆ·ÈÆºÊÆ·ËÃ´ÆÇ¸ÊÇ·ÊÇ·ÇÅµÈÄ´ÈÆ´ÇÆ¸ÊÄ¶ÇÇ³ÈÅ²ÆÅ·ÈÃ¶ÈÅ¶ÈÆ¶ÇÃ´ÆÃ³ÇÈ³ÃÃ³ÇÃµÈÄ¶ÇÅµÉÅµÇÄµÆÃ°ÈÆ·ÇÄ·ÆÄ·ÇÄ³ÆÃ²ÊÂ³ÆÃ¯ÅÃ°ÈÃ¶ÆÅ´ÈÂµÆÂµÆÁµÆÃ³ÆÃ³ÆÁ³ÄÃ²ÆÂ°ÃÁ±Ä¿³ÃÁ³ÇÂµÃ¾±ÈÁ°ÅÁ±ÅÁ¶Ç¾²ÆÀ³ÄÄ¯Ä¿µÅ¿¯ÃÀ³ÃÁ±Ä¾³Æ¾³ÂÀ³Ã¿¯Ã¿²Ç¿¯ÄÁ´ÅÃ²ÄÁ³ÄÀ¯ÁÀ³ÄÁ°ÁÁ²Ã½µÂ¾±ÃÁ®Ã¾±ÃÀ°ÃÁ±ÄÀ²Â¾°Ã¿­À½²Á¾­Â¾­Â¾®ÁÀ®Á¿°¿½¬À»±Á¼±Â½±¿¾°À¼¯Ã¼¬¾»¬Ã¼®¿»ªÁ»¬Á¾¯Á¿«À¸­Á»¬½¼¬Á¾³À»²Á»®¿¾®Áº°À¼­Á¼ª¾¾¬Á¸®¿¼¬¾»¯Â¾¯Á¾­¾º­¾º¬ÀÀ­Á½­Á»¬À»©½¾­Á¼°¿½°¾¾°¾»®¼¾®¾»­¿»­À»­¾¼®¿º¯Àº¬¾½®¾¼¬¾·¬¿»¬¾º¬¾»«»»­¼º¬¾»®½¹¬¾¹«»º¬¼º«¾¹ª¿·ª¼¹§¼¹¬»·¬¾»¬»º«Á¸§½»ª¼µ«»¹©»·«»¸«½µ®¼·ª»¸«»·©»·©»¶«·¹®½¸¨¸·§»³¨»¶«»·©»»¤»¶«»·ª»¸¨¹µ§½¶§¸·«»µ§»´©¸µª¸µ©»¶«¹±¨µ³«º´¦ºµ¦··¨º³§¶¸§·´§¹µ¥¹¶¥º·©»¬¥²³¦³³£³´£¶·£³µ¥·´£¶± ³³©¶³¤¶´¦·³¦·µ¥¶³¥·´§µµ§µµ¡·³¨¸µ¥·´£»³¤·¶¤··§¹µ¨½´¨¸¶§·´ª¹¶¨º·¥¶¸¥¶¶¦¸¶£»³£¶·«¶¹¨¹¸§¹´§»·¨¹·ª»¹§¹º§º¹ª»¶§¹¶¨»¶¬»·¨º¶¬½·ªº¹©¼º«ºµ§º¸ªº·¦½¹ª¾¹¨¹·©¾¸ª¼»«º»§½·ª»¹§»»«»ºª½½§¾¹¬»»ª¼»«»¹¬¾¹¨½¸ª¿»§»¸¬½¹©¼¸¬º¼­½·©»½¬½»¬¾½­¼¼¨½»­¿»­½½­½»­Á»ª¾½®»¼¬¼ºª¾¼®½¾®½¿²Ã¾­½¼¬¾¼­Á¼¬¿¿©¿»²½½­»»¯À¾¯Á»­½Á®À½®À½°ÁÀ²¿¿±Ã¾­¿Á¬Á¾­Á¾¯ÀÁ®Ä¼¯¾¾¬¿¾±À½¯¿¾²Ã¼¯¿¿®Ã¾°ÁÀ®ÃÂ¬ÆÁ®Â¿®Â½°Â¿®Á¿¯À¼³ÂÁ¬Á½²ÃÀ¬ÂÁ°ÂÀ®ÂÂ±ÄÁµÃÀ²ÄÃ±ÃÂ²ÁÄ²ÃÂ°ÅÄ³ÇÀ®ÃÁ²ÁÂµÄÃ³ÁÁ°ÆÂ²ÃÁ·ÆÃ³ÆÄ³ÄÃ³ÇÅ³ÆÃ²ÂÁ´ÆÅ³ÆÃ³ÁÃ³ÄÃ³ÃÃ³ÃÄ´ÆÃ±ÅÃ³ÆÃ³ÆÀµÅÁ²ÆÆ¶ÆÂµÆÆ³ÆÂµÅÃµÆÆ³ÆÅ¶ÉÃ´ÆÃ¶ÆÆ³ÊÃ·ÆÇ¶ÈÃ³ÅÆ·ÅÆ´ÅÅµÇÅ¶ÆÅ³ÇÆ·ÆÃµÆ¿°ÆÆµÃÆ»ÇÅ¶ÆÃ¶ÆÆ´ÊÃ¹ÅÆ¶ÈÃ·ÉÇµÇÆ·ÆÂµÃÆ¹ÊÈµÆÅ´ÉÃ¶ÇÃ±ÆÂ³ÇÄ¯ÈÅµÃÉ³ÃÃ´ÇÂ´ÇÅ³ÆÃ³ÆÆ·ÇÆ¶ÅÁ±ÄÀ³ÈÆ³ÈÅ³ÌÃ¶ÆÆµÈÄ±ÆÆµÇÅ±ÆÆ·ÆÅ³ÇÆµÄÇ³ÄÃ³ÃÄ³ÄÃ­Ä»®Ã·¯À»°¾¿®Á¿®ÄÂ­¾Â±¾¼­¸·¦¯¯¯ xkioti{idzb~uft`{n_rq[{ubxd~|ikkoqrozurqqurlwgxd{fd~f~lkqttuonootrrlorg{d~wbf|d{f~k~kl~i~|i~{i|wg{w_utbuw_xq[tgWliSl`WkbUn_QnbSg]MibUg]Ql`QgfSd`Sf_QiYOb_Yb]UgYKiYQf`QldQb`Un_[ifWfo]oi_nn[nrkxxkulwxgzufur`ul[rfYtgQkgSo]SndSidSn_WkbSngYl`UtgUonYtn]uobwtdzro~q~qknzdrf~rg~xi~nxwwqxq{oowwuwt{rkdrYwi]tlWqiUqbQnbQngYri[qdWrn`|~£»¬±Á±»Ä¹ÅÊ·ÈÌ³ÇÆ·ÈÅºÉÆ»ÉÍºÉË»ÈÎ·ËÈ·ÌÌ»ÈÌ¶ÊÆºÇÈ·ÊÊ¸ÊÈ¹ÉÍ»ÊÌ»ËÅ¹ÊÈ»ÇÌ¼ÌÌ»ËË»ÌÍ»ÌÌ¼ÌÍ»ÎÍ¾ÍÌºÎÊºÉÎ»ËÉ¹ËÉ¹ÈÈ¼ÉÊ¼ÌÉ¼ËÎ¹ÍÌ¼ÌÍ¸ÊË¹ÈÈ»ÉË¼ÊÍ¹ÊÊºÈË¹ÊÌ¹ÌÈ»ÊÊ¹ÉÌ¹ÈÌ»ÌÈ·ÇË¼ÈÊ¹ÈË»ÉË¼ÊË½ÊÌ¼ÉÊ¹ÊÈ¸ÈÈ´ÉÊºÉÈ¼ÉÊ»ÊÈ¹ÊÇ·ÊÊºÈÉ»ÈÇ¹ÊÊ¹ÈÈ´ÊÊ¸ÌË·ÊÌºÊÇ·ÊÊ¹ÉÆ¹ÆÉ·ËÈ¹ÈÆ¹ÈÇ´ÈÄ·ÆÇ¹ÉÆ¸ÈÅ¶ÉÈ·ÇÈ¸ÈÈ·ÃÅ·ÇÆ·ÇÈ·ÈÇ»ÈÅ³ÈÅ·ÄÇµÈÃ¶ÅÆµÈÃ¶ÄÅ·ÈÇ¶ÆÅ·ÄÆ¹ÅÅ·ÈÅ·ÇÉ¹ÈÅ´ÃÆµÆÅ¶ÈÆµÄÅ´ÆÇ¶ÇÅ·ÆÃ²ÅÂ·ÆÆ³ÆÅ´ÈÂ¹ÅÆ¸ÆÆµÄÅ¶ÄÆ³ÅÀ¶ÃÄµÅÂ¶ÅÅ³ÅÂ¶ÁÄ´ÅÃ·ÃÁµÆÃ¶ÃÄ³ÅÂ´Å¿³ÂÂ´ÂÁ³ÂÃ³ÃÀ³ÅÂ³ÃÃ·ÅÃ³ÅÃ´Á¿³ÂÂ³ÂÁ²ÄÂ³ÃÃ³ÃÁ³ÃÀµÅÁ¯ÆÂ°ÁÃ³ÁÁ³ÃÁ²ÁÁ²ÀÁ±ÃÂ³Â¿³Â¿³ÃÀ¶ÃÂ³ÁÂ³Â¿³ÂÃ³ÀÀ³½Â¯Ã¾¯½À³ÃÁ³ÃÂ²ÁÀ±ÃÁ´ÂÁ°ÁÀ´Á¾´ÃÃ³ÄÃ³¿Ã´Á¾²ÀÁ²Â¿²Á¾°Â¿³ÂÁ±Á½¯Á¿³¿¾°ÁÀ³¾¾¯¿¾³¾¿³½À®À¿²¾¿¯À¿°Â½±¾½°»»¯¾¼­¿¾±»½­¿¼°À¾®Á¼°½½¯Á»³Á¼°¼½¯½»¯¾»®¿½®¼½®½»®½½­¼»°»º°¼½®¾»°¼¹°¾·¯¾»¬¼º¯»»¬¼¼­»¼­¿¾­¼¹¬¾»¬»½°¼º®¾»­¼¼¬º¹®½»¬¼»­ºº­¹»®½º©¼¸¬»º¬»¸¬º»¬·½¬¾º­º¹¬º»¯¹§¬° µ¯¡³± ¶¯´­³²¡µ¯£¶¯¶®¸±£²°¡¸¬¡¶®³®µ±£¶¯¤·¯µ®·¯£¶° µ²¡¸±¤´¯ ¶³£·¬µ°£·¯¡µ²¢¸­¡·±£·±¡·°¢¶±£µ®¡¶²¤¶²´¯¥·³¤¸µ§º±§¸±¡·°¢µ´¥¹²£»²£µµ¨¸³£¸°¢¶²£º²¥º³¤·µ£¸²¦»³£¸µ¦¶³£»³¥¹³¡·´©¹³¡¹´¦·³¥¸´£»³£¶¶¥»±¥»µ¦º¶¥¾´¦»·¦¸µ¨»³¦¼´¦¼´¤»µ¨»·¥ºµ©»µ©½·¥¾¹§»·ª½¸¤»·¨¼¹¥½·£»·ª»¸¨¾¸ª¼·£»·¦¼¸¨¾µ¥½·©¾·§¾¹©¼·¨¾¶©¿¹§¼·§½·©¿¸©Áµ«¼»­À»¨¼»«Áºª¿¼©Áº©½¹ª½»¬½º©¿¸ª¿¼¦¾º§¾»©Á¸«¿ºª¿·¬Àºª¾»¬¾»¬¿»¬À¼ªÂº¬Á·ª¾ºªÃº«½µ©¾»®Á½¬À»®Á¼°Á»­¾½¬Á½¯Â½¬À»«Á¼¬ÁÁ«Á»°Â»­Ã¾«À¾°Å»®Å»­Ã¾¬À½®ÃÁ°Å¼°Ã½®Ä¼­Á¾®Ã¼®Å½­ÁÀ°ÈÀ±Á¾ªÂ¼«Â½¯Ã¿³Ä½®Ä¾®Ä¾­ÄÁ°Å¾¯Ã¼±ÃÃ³¾¾®ÆÂ®Ã¿°ÄÀ¯ÄÂ±ÆÀ°ÃÂ¯Ã½²ÆÁ­ÁÁ¯ÄÀ®ÅÁ²Ã¾°ÄÁ±ÃÀªÄÂ³ÄÀ®ÃÁ°Å¿±ÃÃ¯ÄÃ²ÇÀ²ÃÁ³ÆÁ±ÇÂ³ÄÁ²ÂÁ¯ÂÀ°Æ¼°Æ½®ÃÀ¯Ä¾¬ÃÁ¬ÂÁ¯ÆÀ²ÆÁ°Æ¿°ÄÁ±ÇÀ°ÄÂ³ÇÂ±ÁÃ³ÅÁ°ÃÃ¬ÄÃ¯Ä¿®ÄÄ®Æ¿²ÄÁ±ÄÄ°ÇÁ³ÆÃ²ÄÃ°Ã½¯Á»¬Ã¾®¾¾¬ÃÀ¬Â¼«ÀÀ¨Ä½«Ã¾ªÃ¾¬Á½­Á¸¬½µ ¸¯¯¨©zkzdxd{bbud|b{b~o[|gW{iQwgW|nW{rY|nWxt_{`|b{ignwwtkgni~ltbq_|oWu]{zfzgwf~gzgxf~qlln~gwf~tguiwkizo|o~ng|bgi{illxdzf{|f~d|z`{ub{rWxoWtlUq`UkbMndMk]KlbMf]FgUIdYFdWMdQIb[FbYIbSDdQKdSIdYKfSKdQDdQFiWKf]K`WOgSMiYSk`Uk`UkbUluftr`uxdztfxn_tqYqgUndUn_UqWKgWMl[QiYKdUQgYMlYMk`In`QobQtdOkdStiYrq`wqk|orxrlu`rU{k]|o`|zglrxnq|fqgixi~lqi~k{lnnwi~q]|dSt_Mn_Sq`Ot_Ml]KlYQl_Kl]Mni`{~¬¤©¾«¸¾±»Ä·ÁÆ¹ÃÃ³ÇÅ¯Ç¿³ÄÃ·ÆÇ·ÈÇ¸ÈÇ·ÉÈ´ËÆ²ÈÃµÉÃ¶ÈÆ³ÈÁ·ÈÈµÈÈ·ÉÉµÌÆ¸ÈÆ³ÇÃ¶ÉÄµÊÉ·ÉÆ·ËÇ¸ÈÆ¸ÇÃºÈÄ·ÉÆ³ÈÄ·ÉÊ¹ÊÇ·ÅÃµÊÆºÊÇ·ÈÇ·ÈÃ¶ÊÈµÊÉµÈÆ·ÊÆ´ÈÇ¶ÄÆ¶ÊÈ·ÈÃ·ÇÆ¸ÊÆµÊÊ¶ÇÄµÉÆµÈÄµÆÇ·ÉÂ³ÇÇ·ÈÅ·ÇÆ¶ÈÃ²ÅÃµÈÄ³ÈÂ¶ÅÄ³ÆÄ³ÊÄºÉÄ³ÇÄ¸ÆÆµÈÃµÄÄµÈÇ·ÈÆ¸ÊÆµÇÃ¶ÈÆ¯ÄÆ·ÅÃ¶ÊÃ±ÇÁ²ÄÃ³ÅÆ³ÅÁ¶ÇÄ¶ÆÃ³ÈÃ³ÆÄµÇÃ³ÆÃ³ÆÁµÇÂ³ÂÂ²ÄÂ²ÅÀ³ÆÃ³ÃÁ³Ç¿²ÅÁ³ÅÀ°Ä¾±ÁÁ±ÃÃ³Æ¿²ÃÂ³ÇÃ´ÅÁ²Ç¿³ÄÀ³Ã¾²ÅÀ°Ä½±Ä¾²ÂÀ³Á¿³ÁÁ³Â¿²ÆÀ°Â¾²ÄÀ²Ã¿°ÁÂ³ÇÀ³Ã¿³Á¾±ÃÁ²Ã¾±ÆÁ¯½½°À¾°Á¾®Á¼°Ã¾¯Á¾³Â¿³Ã¼°Ã¾¬Á½­Á¾°¿»°Á¾°Ã½®Â½¬¾»«Á»®¾À±ÀÀ°Á»ªÀº®Ã½­Á¾¬Á¾±¾¼¬À»®¾·¬À¼°ÁÁ¬Â½®Á»²¿½®Ã¼®À¼°Áº­Á½°¾¾¬Áº®À¾¬¿¿«»¼¬¾»®¿»«¼¸¬¿¼¬½½¬Á¾¯À»°¿¾®½º¬Á»®¾»­¾»¯¾»®Á¼¬¼¹¬½ºª¾»ª¿¼¬¾·¬»º«½»­¾º¨¼¹­½ºª½¸«¾·¬»ºª¾·«»¸¬¼»«¿¸¬½·¬¾º®À¹¬À·«½¹«»·«½¶©½·¬»¸«ºº©¼·ªº·ª»¶©·¶§½·¬¼·«»·©½»¬½¹«»¸¨º¸§¹¸«»´ª»µ¨¸·¬»·ª»¶¨»µªº¶ª¹µ§¹»¨»µ©¸µ¦»¶¬¹µ¥»´©¸³¤º³§·´¦º´£·²©·µ¨»³¥¹¶¨»´¨¸·¨µ­¤³±¥¶³§·³¤·³¦·µ§··©»³¦µµ¤¶³¥·µ¦µµ¦·³¤··§·¶§»³¥³³¥»·¥¶¸¥º³¢¹±¥·¶¥º¶¬·³¢¶´ª·´¦º³¦·¶¤·³«º·¢·´¦¸´¤·µ¦·¸«¹´¦ºµ¨·µ¥¸´¬¼¶©º¸¦»¶©·¸«»·¨¹µ¨¹¸©¼¸¨¸º¬¼¶©¹µ©·»§»·¨¼¶£»·¬»¹ª»»©º¹©·¸¨¸·¬»¹©¼¹¨»¶ªº¶ª»¸¬»¹¦»º«º¸¬¼¹¬¾¹¬»º¨¼¼©¹¾¬¼»¨½·¬º»©¿»­½º¬¾»«¼¼®¼¹¬½»¨¾»¬½¾­¿¼¬Â¹¬À»¬¾»ª¾À¯¿»­½»¬½¼®¾¾¬¿»°À¼¯¿¼¬¾¾¬¾¾­¾½­»¾¯Á½¬¾¼­¾º¬À¾¯Á¾±Á¿±À¿­Á¾±¿¿±Ã¾¯Â½¯ÀÀ­Ã¾¯¿¾¯ÁÀ²¿¾®À¾­À¿²ÃÀ¬Á¿°Á¿¬¿¾¬À¾³¿¾°ÁÁ¯ÂÀ®¿¾²Æ¾¯Á¾¬Ã¾°Ã¼¯ÀÁ¯Á¾±ÆÁ±ÃÁ²ÃÄ±ÃÀ³ÅÀ²ÂÁ°ÂÃ°ÂÁ³ÁÃ³ÅÁ³ÄÄ´ÃÂ´ÄÁµÇÁ³ÄÁ³ÃÅ³ÃÁµÃÁ°ÃÃ¸ÆÃµÄÁ±ÃÃµÅÅ³ÇÃ³ÆÃ³ÅÁ´ÄÆ³ÄÃ³ÆÁ³ÆÆ³ÃÁ¶ÇÂ´ÆÃ±ÅÃ°ÆÃ´ÇÃ³ÃÅ¸ÁÂ³ÆÃ³ÆÆ´ÇÃ²ÆÆµÇÆ·ÈÄ³ÅÃµÆÂ´ÅÅ´ÅÆ·ÈÈ´ÇÆ³ÄÃ³ÃÈ´ÆÃ¸ÉÃ²ÆÆµÈÃ·ÅÅµÇÊ´ÇÈµÅÇ·ÆÂµÈÅ³ÆÅ·ÆÃ³ÆÇ±ÆÄµÈÅ¶ÆÅ´ÆÅ·ÊÅ·ÈÉ¶ÉÇ¸ÄÆµÊÅ´ÅÆ¸ÉÅµÈÀ³ÈÆ¶ÃÄ²ÈÅ·ÉÇ¶ÈÈ·ÇÆ´ÅË·ÈÆ¶ÆÈ´ÆÉ¶ÈÈ¹ÈÇ¹ÈÆ³ÉÃ´ÆÀ®ÆÀ³ÂÀ´ÃÆ³ÅÈ³ÅÇ³ÆÃ¹ÇÇ¶ÃÃµÂÂ²¾º¨¹´ ±±«¨¤xl|figllgzi~q]zq[|u`z~`d~b{bxf~kktoz{zuon|k~k{b{_|{dklqgk{g{g{n{o|l{tolnluqqnoqrxqrtqouroxiuqgul_rl_on[nbSoi[og[if[ldWi`Sk`Ui[Q`YQg]Qb]Og_Oi_SdYQg[Of]SddQi]Od_Sl`QkiUi`[kdUnbWli]or[onfqownn|nzxdtubun`rq_nkWokUn_WlgUqdSqdOofQofUokWrlYtnUqoYtqbtubzi{zkrwtwuk{i|r]{ok~uo|uqnzouqt|roxq{|uqxlq]xn]un]toWro]woUni_wfYqiYoi`zuzµ¯¯Á¯½Â·ÃÆ¹ÃÊ¹ÆÌºÉÊ´ÌÇµÊÄ¹ÆÌ»ÌÉ¿ÍÌ¹ÊÌ¸ÊË¶ÈÆºÇË»ÊÌ¹ÊÈ·ËÈ·ÊÊºÎÌºÌËºÍÈ¼ÊÈ·ÌÎ½ÉÊ¼ËÉ½ÊÊ»ÊÈºÈÊºÊÊ»ÌÉ»ËÎ»ÊÊ¹ÇÊºÉÍ»ËÌ»ÊÌ¼ÌË»ÌÉ»ÊÍ¼ÌÉ¾ÌË¼ÌÌ·ÉÇ»ÌÌ¾ÌÏ»ÌÌ¼ÌË¹ÌÊºËÌºÌÈ¹ÈÈ»ÌË·ÇÊ¼ÊÌºÊÈ¹ÊË·ÉÊºÉÉ»ÊÈ¶ÈÇ¹ÉÊ¸ÊÉ¸ÉÈºÊÊºÉÊ½ÉÈ¹ÊÊ¹ÊÈ·ÉÉ·ÌÈºÊÌ»ÈÈ¶ÊÆ¶ÈÇ¹ÉÊ¸ÈÉ·ÈÊ¹ÇÇ¹ÇÆ¶ÃÊ·ÈÄ¹ÈÇ´ÈÈ¹ÈÆ¹ÊÆ¸ÆÈºÆÆ¶ÊÈ¶ÆÆ¸ÆÆ·ÇÆ¶ÈÊµÉÄ¶ÈÅ¶ÆÆ·ÆÆ¶ÆÅ·ÇÅ¶ÄÅ¸ÆÅ·ÆÊ¸ÈÅ¶ÇÃ´ÈÅ³ÅÃ´ÇÅ·ÈÄ´ÅÃµÈÅ¹ÃÂ³ÆÄ´ÃÅµÆÇ¹ÇÄ³ÃÂµÄÃ¶ÆÃ·ÃÃ´ÆÁ·ÅÅ³ÄÅ´ÆÅ³ÅÂ±ÆÄµÄÃµÂÅ³ÃÃ³ÃÂ³ÆÇ²ÃÂµÆÂ®ÇÅ³ÃÃµÃ¿´Ã¿³Ä¾´ÃÄ´ÄÂ´ÁÁ³ÁÁ³ÆÁ²ÁÆ³ÁÁ´ÀÂ±Á½³ÃÁ²ÁÁ¯ÂÁ³ÀÁ²ÁÁ³Â¿²Â¿³¾Á´ÃÂ¯ÄÃ¶ÃÁ³ÃÂ³À¾³¾Ã°ÁÁ³À¿³ÁÁ°ÂÁ°Ã¾³ÂÁ´Ä¾°¾Á¯¿Á²ÁÃ³ÁÀ²ÂÂ³ÁÀ³ÁÁ´ÂÁ³¿¿´ÁÁ³¼À´ÀÁ³¿À¯Á¼¯À¾³½¾³ÁÃ´Ã¿­¿Â²Â¾­¾½±¾À¯¿¿°ÀÀ¯¿½±¿¼±¿À³¾Á¯¼¾­¾¿³¾½±¿½²Á¾°½¾®¿¿¯¸¿®¿»¬½¿±¼½®½º°º¼¯½Á¬»¼¯¾½±Á¹¬»¾¯¾½¯¼¼¯¼½¯º¼¯¼¼®º»±»¼¬º¼®¾½±¼¼¬»º®½º¬¾½®½»ª¸»¬»º®»¹²¼»¬»º°½º¬»º¬¹·«º¸«º»®½¸¬»»¯¼¼¬º»®»¼¬»º®¹§ °¯¡³¬¡µ±¡·®µ° ³¯¡¹²¢·±£µ°´¯³¯µ¯¡¸¯ ·® ´°¢µ¯¡µ°¥·° ³­¢´°¡³°£³¯¡µ³¢´°¤¹±£¸²·² ´®¦·¬·²¢·°¡¶²µ° ·°£¶³¡¸µ¡µ²£º° ·²£¹³¥·´£»´¤µ¶¦»µ»³¨¸°¢³·¢º³§º³¥¸³§¸°¡º³¢·³ º²¤½´¢¹´£·¶¡¸³¡»³¦»²§»¶£¶´£»µ¦¹¶¡»³¨»³©½´¥º³§º´¡»µ§»¶¦»¶¦Á³§¸µ£»´¦ºµ¥»·§¹µ¨º¸¨º·¥»·§½·¨¾¸§»¶¨½¶¦»¹§¾·©¼µ¤¾¶ª¾·ª»¹¦»·§½µ¦»¸¬Á·©¾¸¨»ºª¾·§¼º¨¾¶ª¾º«À¹«Àº¦½»¬Á»«½¸¬À»°¾½¬Á»¬Á¹«Á»«½»«¾¶§¾»ª¾·¬¾¸§Á»ªÀ¸©À½«Áº«Áº¨Á»«¿¸©¼½¬Ã·«Á»ªÀ¾¬¿º¦À»¬Á»¬¿¼°Ã½¬Ã¾ªÁ»±À¾­Ä¼®Ã½¯Á»ªÃ¼¬Ä¾®Å½®Â½¬Á»®ÆÀ°Â¿¬Å¾°ÃÀ¯Ã¾¬Æ¼°ÄÀ°Ä¾­ÁÀ­Â½±Á¾®Ã¾¯Å¼°Ã¾¯Á½¬Ä½±Á¾±ÆÀ®Å¿¬ÃÀ­Ä½°ÆÀ®ÄÁ¯ÃÁ­Ã¿¯ÃÀ¯ÃÁ°ÅÃ°Æ¾°Æ¾°ÆÀ±ÅÁ±ÅÀ±ÅÀ°ÃÀ¬ÄÃ²Ã¿³Ã¿°Å¾®ÄÀ­ÄÀ°ÃÁ²ÄÁ®ÆÁ³ÆÂ³ÇÁ²ÊÀ°ÆÁ°ÈÁ®ÇÁ±ÄÀ®ÄÁ¯ÆÀ²ÄÀ±ÆÁ¯ÆÄ±ÄÀ±ÇÂ³ÆÃ°ÇÂ²ÇÁ°ÆÁ²ÄÃ±ÆÀ°ÇÀ¬ÄÀ²ÅÁ¬ÆÁ®Ä¿±ÇÂ°ÃÀ³ÃÁ°ÃÃ±ÄÀ²Ã¿³ÃÁ³Å¾°Ç¾¬Á»­ÆÀ«Æ¿¬Ã¿±ÃÀ³ÆÃ²ÃÃ´ÁÁ°ÃÀ­Á·§»µ ³ª© q|dx`~ggwigdo[~gU{f[||`{`qdztd|q]t[|z]bzgiqutxl~br`~r_q_~q`~|_~`|gddzt`qb~q[{g]{g]|u[t_w`w`|gzflknuuwlk~k|fxd|wg|d~tg~wdwgld{`Yu]Qr]Iq_QqWIoWOgWKnQOnWMg]Og]On]MgYIiUIkOIdQDiKFdUFdMIgQIiUKdYIgSMdWKn]MgWFiYMk_Oi]Kk]UikSnf[qk]utkx~nzzl||gzw]zi]t`UodSlbUqgMngMo_QniStiUtlQtlYrfOtdQnbWxiWrgWtk]wxd|{d~|k{gqo~l|kfq]nSxl]{nbxui~{l{n~qrnizfwi~ok{lqw~k~bt]gSt`Ot`SndSugWtdQnbQtbMqgSxfY~~£¥»®µ½¬¾Á°¾Á·ÅÇµÈÇ·ÆÈ·ÊÄ®É¾³ÁÁ³ÅÆ·ÈÈºÊÈµÉÀ³ÄÄ¸ÈÇ¶ÈÄ¯ÇÃ³ÅÈµÉÈµÊÆ·ÊÄ·ÉÈ¸ÈÈ³ÊÆ·ÊÇ·ÌÈ¸ÉÈ¶ÇÇ·ÊÈ¹ÊÈ¸ÊÆ¹ÊÇ·ÊÈ·ÊÇ»ÈÅ¹ÌÈ·ËÈ·ÊÉ»ÇÆµÌÆµÈÄ¹ÈÆ³ÇÆµÈÄµÉÆ·ÊÇ¹ÈÆ·ÉÆµÈÆ·ÊÅ¶ÇÄ¸ÆÆ¶ÈÅ³ÈÆ·ÊÆµÊÂ¸ÈÃ³ÈÄ³ÈÆµÄÁ³ÆÁ³ÇÅ¸ÈÂ·ÇÃ·ÆÂ³ÈÃ¶ÊÃ³ÅÃ³ÇÃ³ÉÄ´ÉÆµÆÁ²ÈÃ³ÄÄ´ÉÄ³ÈÄ³ÈÂ³ÅÃµÈÁ³ÆÁ³ÄÄµÇÃµÇÆ±ÅÃ³ÆÄµÇÄµÈÁµÅÁ°Æ¾³ÇÁ³ÈÀ´ÄÃ³ÅÁ°ÈÃ³ÇÄ³ÃÁ°ÅÁ±ÆÁ¯ÄÃ°ÃÀ²Æ¿¯ÄÀ³ÄÁ³Æ¾±ÆÀ®Å¿´ÃÂ­Ç¾²Ã¼®ÂÁ²ÆÀ¯ÅÁ³ÆÀ¯ÃÁ®Ã½±Â»°ÂÁ²ÅÀ®Ä¿±Á¿²Ä½²ÄÁ´Ã¾¯Ã¾®Ã¾°ÁÁ®Æ¾®Ä¼²Â½®ÁÁ²Ã½¯¾¾°Ä¼®¿¾®Á¸°Á¾¯Â¾¬Â¼­Á»®¾½­Å¼®À¼²¾À²Â¼®Á¿«Á»¬¿»¬Á¹¬Á½¯¼º®À¾­½»®¾½¬¿½¯¾¸­Á¼¯¾»¬¿»¬Âº¬¿º®Á»®Àº¬Áº­¾»®Ã»®½»®Á»«¾½®¾¸¬¾¾°Á»®¾»±¿»±À¾­¿½®¿¹­Á¹¬½º­¾¾®¾»®¾¹ª¾»°Á»«¾¼¬¾»®À½¯¾¹¬¾º¬¿¸­¾»®¼¾­¾º­¾·­¾¸¬¼»¬»»¬¼¸©¾¹­¾º«¾»©»¹¯¾»©¾·¬»»«»·ª»³«¼·­À»«º·«»¶«¼¸©½·«¾µ©»¹¨¸³©º¸ª»µªº¶ª¸¸§º·ªº¶ª»¸«¼µ©º¶¨½µ¨ºµ©»¸§º·§»³¥º¶©·³§º³¦·µ§·´ª¾·¥º´¥·µ§º·­»µ©º·©¸µ©»·ª¸°ª±¶§·´¤¶¶¡´´¦µµ¥¶´¨·µ¢µ¶«¸µ¢µ´§·µ¨µ´¦º³¤¶¹¨¹³¨¹µ¥¸³£··§·µ¢µ·¨»³§¸¶©·±¥¸·§¹¶¦¶¶©¸·¤·´§µ¶¦»·«·µ¥»·¨µ·¥·¹§»µ§·µ©»·¨·¸©¼¶¨·³«»¹ª¼µ©º¹«»´¨»º¨¼µª¸¸§¼¸ª¹»¨·»¬»¹¦¼º©¸´§»º­½»¨¹¹©»º¬º¶©¼·ªº·«¼º©»ºª¼¸¬¾¼©¼¸°º¸ª¼»¬»¹©»¹¬»¼®»»¨»º¬½»¬¼¸ª»»¨¼º«¾¾ªÁ½¬¿¹¬¿½®¼¼¬¼¼¬¿»ª¼º®¾»¯¾¹­¿¹¬¾¾¬¾»­¿¼¯Á¼¬¾»¬À¼ªÀ½®¾¼­Á½ªÀ»¯Á¿­ÀÀ®À»®À½¬ÀÀ±ÁÀ¬Ã½­ÁÀ±Ã¿±Ã¿¯¿¾¬Á¿®ÃÁ°Ä¼®¾¿¯Á¿­À»±Á¿¬Á¿®Ã»¬Á¿®À¾¯Á¿®ÃÂ±Ã¿±Â¿­ÀÁ¯Á¾­ÃÀ°Ã¾¯Á¾¯Â½¯Á¾¯ÅÃ³Â¾µÅÆ³ÄÅ³ÅÁ±ÅÁ°ÀÃ³Ã¿±Ä¾®ÃÂ¯ÄÄ³ÃÅ²Å¿¯ÆÁ´ÃÅ®ÅÁµÃÅ±ÂÃ³ÈÅ³ÅÁ³ÅÂ´ÅÇ³ÄÃµÅÅ³ÆÆ³ÆÄ³ÃÃµÃÄ²ÆÁ²ÄÁ´ÅÅ±ÇÁ´ÄÃ³ÆÁ³ÄÂ³ÅÅ´ÆÅ³ÈÃ¶ÆÄ¶ÇÆ³ÈÆ¶ÆÁ³ÇÃ´ÂÅ¶ÄÁ·ÆÄµÅÆ´ÆÅµÈÆ³ÇÅ´ÆÅ³ÅÂ¶ÇÃ³ÄÁ³ÈÆ´ÈÆµÆÃ¶ÆÆµÄÂ·ÆÈ´ÇÃ·ÈÃµÅÈ±ÇÄµÆÆ³ÆÈ´ÇÅ´ÇÈ·ÈÈ´ÉÃ´ÇÆ¶ÈÈ·ÈÇ¶ÈÈµÈÆ·ÆÃ³ÉÇµÆÆ·ÄÆ²ÈÈ³ÆÂ³ÅÃ³ÅÇ³ÆÊµÆÉ´ÅÈ¶ÊÇµÈÈ¹ÈÅ¶ÆÄ¶ÇÈ±ÈÇ²ÆÃ²ÇÄ¶ÅÈµÆÄ³ÆÇ³ÃÃ·ÅÅ²¾Ã­¹¯¨³² ª©¢wiikkoqqzf~qY|r[uxdug~wf|d{g~z`|iilkxw~rb|kxdb~knrnl{grd{nbof|zf~igi~nonuuw{{|xxo~k{l~|gwzgzzl~xf~rixtf~`{u`{k]ubQufSr_Kn`WkbUn_OndSb_Sk`Sk_[i`OkbSn`Ug_Oi_Ug_Mi`Sk]Qi[Qi]QibUk`SlfUkiYol_ri[nf]onWrlbo{it{kxzq{o{w~i~{f{qfto]tqUqu]owYuu`wubtx_u|iwzf{z`xz]{xdwzdzt_to[wo_zwd{xk|~nrzxwuuofob|ubzo~oquqrunortwnuxokuf{r[zkYrgWwl_oiUrk[wd_oq`tid|l´ª¯¾³¹Æ°ÁÅ·ÁÉ¸ÉÌ»ÊË»ÊÌ»ÌÊµÉÉµÈÁµÆÊ·ÆÌ¼ÈÈ·ÈÌ¹ÈÊºÈÎ¾ÌË»ËÇ·ÌË¼ÇË»ÌÊºÊÎ¼ÌË¸ÊÌ¼ÌË»ÌÊ¾ÌËºËÌ¼ÌÍ¹ËÎ»ÍÌ¿ÏÌ½ÌËºÌÈ»ÆÊ¼ÊËºÌÊ¼ÍË»ÌÊºÍÊºÊÊ»ÌÉ»ÌË¼ÈÈ¹ÊÌ½ÌÊ»ÌÈ»ÊË·ËÈ¼ÊÉ»ÊÌ¼ÉÌ»ËÊ½ÊÇ¸ÉÊ¸ÊÊ¹ÈÊ¹ÆÈ¸ÈÊ¸ÈÈºËÈ¸ÊÉ·ÉÇ½ÊË·ÇÈºÈÈ»ÈÇ·ÈÈ·ÈÊ·ÊÈ¸ÈÆºÈÇ¹ÇÆ»ËÉ¶ÊÊºÌÊ¹ÈÌ·ÉÃ¸ÊÆºÅÊ·ÆÈ·ÊÇ¸ÆÈ¼ÈÈ¶ÆÈ´ÆÆ¶ÇÇ·ÈÈ´ÇÇµÆÆ³ÈÆ·ÈÇ¹ÈÆ¶ÉÃµÅÇ¶ÆÄ¸ÆÆ¶ÊÅ´ÆÃ·ÆÃ¶ÇÃµÄÅ·ÆÃ·ÆÆ¹ÈÅ¹ÇÁ·ÅÅ¹ÈÆ´ÆÅ¶ÅÃ¶ÅÂ´ÆÇ¸ÇÅ´ÆÆ¶ÃÃµÅÅµÄÂ·ÅÃ¶ÃÄ°ÆÄ³ÃÅ·ÆÁ³ÃÁ±ÂÆ¶ÆÁ´ÃÆ´ÅÄ³ÄÃ¸ÁÄ´ÄÃ³ÃÁ³ÄÃ´ÆÄ³ÃÃµÂÁµÅÅ³ÁÃ²ÅÁµÀÀ°ÁÅ´ÁÁ³ÂÁ¶ÄÂ³Á¿±ÅÃ³Å¿¶ÁÁµÁÂ°ÃÂ³Â¾¯ÁÁ±À¿³ÁÄµÅ¾³Á¿´Á¾´ÁÁ³ÁÀ´¿Á¯ÃÀ±ÂÃµÁÁ³Â¿²ÂÁ±ÃÀ²ÁÃ°Á¿°¿Á³Â¿´ÀÁ³ÃÁ°À¾±ÂÂ±¿À¬ÁÂ³ÂÂ²ÁÁ¯ÁÀ±ÁÁ²½À±ÀÀ³Ã¿³À½®¿¾³¿Á°ÁÀµÀ¿³¾¿¯¿¿³½¾¯¾À²¿¾®¿À°Â¾±¾À³»Á¯º½°ÁÀ³À¼°¿¾³¿¾®ÁÀ¯À»²¾À°À¾®»¼±½»³¾¾¯½»°½½­¾»­½º«»»³½¹©¼»°»¼®¾½¯¼¾¬º¼®½¾¬»»°¼»«¼¹¬»¼¬¾º¬½º¬º¼¬»»ª»¸¬ºº¬··¬»¹¬º»¬¹¸¬¼º­»¹¬¹º¬½¸¬¼¹¬½½¬¹¸¬¸»¬·ª ²±¶®·²£·®·¯ ´²·° ´° µ°µ¬¢µ¯¡¶­£¶²¡µ±¢·² ¶² ·¬ ³¯¤³² ¶± ¶¯´°¡¶±¢¶³¢·²¥·­£¶±·° µ°£µ³¢¶³¤¸®¡º¯ ¸³£µ°¢µ°¤¹³ ¶³¤¸´¤·³ µ²¦¹±£»±¡·´¥»³¤º³£»°£ºµ£»±£º³§·³¤»³¤º³£¸³¥¼´§·³¢¸¯¤»µ¥¹·§¸³¤¸³¦½³¤»¶§»´£»¶£¸³¥¹´¤¼·§»´¥»´¤½·§¼³ª½³¥¹·¥»³¦»¸§»·¦»¶¨»¶§¼´©½·©½´§½·§¾¸¦¾¸¬½·£»¶©»º§»µ©»¸¨½µ§À¸©½·©½·¬¼¸©Á¸©¾·¬¾·§¾¶©Á·¬¿»«¿»¬Àº©¾¹«À¹©À»©¾¸¬Á·¬¿»«½º¨Á·ªÁ»«¾¸ª¿¹©Á»­Á·¬À¸¬¿¼©À¼¬¾½¬Â¿¨À¸«Á»©Á¼«À¼©¿»¬¾¼¬¾»¬Ã¹©Á½¬Ã¾«Á¾°Â½¬Á½¬À¿¯Å½¬Ã¿¬ÁÀ¬Á¿­Ã¿¬Ã»¬Á¾¬Ã¾¯Ã¿­Å¿­Á¾¯Á¾®Ã¾®Å¾¯Ã½°Ã¾­Ã¾¬À¾®È½¯ÁÁ¬Á¾¬Ã»¬Ã¿®ÃÁªÃ¾­Å¼°Â½®ÃÁ®ÃÁ®Ã¾­Á½­ÃÁ°ÃÁ¯ÃÀ°ÄÁ³Ä¿²ÅÁ²Â¾³Â¾²ÄÂ¬ÄÀ³ÅÁ­Ã¿¯Å¾®ÆÀ²Æ½±Ã¾°ÁÃ¯ÇÁ°Â½­Å¾¯ÆÂ°ÃÁ¯ÆÁ°ÆÃ¯ÅÀ²ÉÀ¯ÆÀ°Æ¾²ÅÁ³ÈÁ±ÃÃ°ÃÁ²Å¾²ÇÁ±ÇÁ³ÇÂ°ÄÀ²ÆÀ³ÄÆ³ÆÁ¯ÂÁ°ÆÁ³ÆÁ³ÃÂ°Æ¾¯ÇÁ®Å½²ÅÀ®ÇÁ²ÁÁ²ÄÃ²Æ½±ÅÃ²ÅÃ®ÆÁ¬ÄÃ°ÇÁ­ÄÁ®Ä¿³ÁÂ­ÁÃ¯Á¾±¼º¦¸¬°¨§¡¤|o|dxf]{dwgfft`lU~l[zr]{wUq[|lW|oYtU{bd`ugtlowq~nx`t_w]{`|]d~~ggu`~kUn_|k[~q[rbd|g|kzg{i{lkquqrwunnwltb{q_nY|k`|lUzgYxiYzoYzq`|o`{|YzqYxfOrkMt`MkbIl_Ki_MlYMn[IgYFiWMlYDfWIiWKf[QdUKkYMd[FkYIgYMfUIg_Ki_Ql]Qk`OngQobUndYooUti_r{ftzd|wgxwi|i~xk{n]zlWqlYriWqnWqg[qkYqi]qiYtk[tr_wo]xl_un`wqf|z`tb|o]|t_|r_|td|tg~qztl|n|uftdk]wn[|tfzwo~lzftg|zb|xg|nlk~zlknr|irdq[~q]{kU{bQtdQrfUogQtdQqlStdQuk`|~£¤±¬®»±¾Á±Ã¿³ÃÇµÂÆ·ÆÆ¸ÈÇ³ÆÇµÉÄ²È»°ÄÁ¸ÇÆ³ÇÃ¶ÈÇ·ÇÉ·ÊÅ¶ÈÈ´ÈÃ¶ÈÆ¶ÈÆ¸ÈÅ»ÊÆ·ÊÊ·ÊÆ·ÇÈ·ËÆ³ÉÈµÊÇ¸ÊÆ¹ÊÊ¶ÊÇ·ËÃºËÊ¹ÎÅºÊÈ·ÆÉ¶ÉÉµÆÇ·ÊÄµÊÅµÉÃµÈÇ¸ÉÆ·ÉÃ³ÈÄµÄÆ·ÌÂ·ÆÅ³ÆÇ·ÇÃ¶ÆÅµÈÄ¸ÉÆ·ÈÆ²ÈÆ³ÈÅ¹ÇÁ²ÈÇ³ÇÂ·ÃÃµÉÅ´ÈÇ¸ÈÇ´ËÈ²ÆÄ´ÆÃ²ÆÅ´ÆÃ³ÄÄµÆÄ³ÇÃ´ÄÃ³ÆÄ·ÅÃ³ÆÃ³ÈÇ³ÈÁµÆÃµÆÃ²ÆÂ³ÅÁ´ÆÃµÆÃ´ÆÁ±ÆÄ³ÆÁ´Æ¿µÆÂµÆÁ¯ÃÂ´Æ¾´ÇÁ°Ã¿°ÆÁ±ÄÀ¯Ä¾³ÅÁ·ÃÁ²ÄÀ³Â¿²Ä¾¯Æ¿±Ç½²Ä¿²ÂÂ´Æ¾±ÄÀ°Ä¿²ÆÁ²ÁÁ²ÆÀ®Ä¿°Å¾³Ä¿³ÄÁ°Ã¼¬ÀÁ°ÅÃ²Å¾±Å¾®ÄÁ±Å¾±Ã¾±Ä¿­Á¼²Â¾¯ÃÁ°Ä¾²Â¾²Á¾®Â¾­Ã½®Ã½®Ã»°Á¾±Ã»®½¾¬Á»«¿½¬¾¼°Á»¯À½¬Á¾±Á¾°Ã¿°Á½¯¿»¬Àº°À¼¬À»³¾½­Á»©À¼±Á»®Ä»­¾½®Á¿®Á»®¿»¯Á¹°À¼­Á¾¬Á¾®Àº«¾¹±À½®»½®À¼°Á¼²Ã¼­½¾¬À¼°¼»¬Á¼°¿¾­À»§½»¬¿»°¾½¬À»¬¾»­¿º¬¾»¬»»¬¾»¯½º¬¾»¬½·«»»®»·®¾¸¬¾¸ª»»«¾¸©»¸¬º¸¬¼¹©½¹®¾»­¾·¬À»®¿º«¼³¬½¸¬º¸«½¹«¼¹¨»µ«º·©¾·«½¸¬¸³©ºµ©»·©·¸ª½·©»ºª¸¶ª¾¸©¾º¥·¸¦¾¶¥»´«»³§½¸¨¸³¤¹´¨»´©·¶¥¸³¥»´¨º³«º²©¹µ¨»¶©¹³«·¶«¸·§¸·§¸²¬¸·©·°¤°¶¨·¶§¸µ¦º·¦·µ¤··©¶±¤¶µ¡·´¦¸µ¨·²¤µ°¦·¶¨·µ©·´ ·µ¥»¶¨µ¶¦³³¦¹µ¤º´§µ³¦¹³§¹¸¦·¶©»¶§¸´¦··¦¹·§¶´¦··«··¨´·§··©·¶§·¸¥¹¹§·¸ªº¸©¹·¨¸º«»º©¹³£¹¹§··¬»»©¹¶§¼¹«¹¹¨¼¸¦¹º¬º·«»·¨»»©ºº§º¸©¹·«¼·¦»»ªº¸¦¼·ª½¾«»¹¬½¸¨»¾«¸¾¬»¼©¾»©¾¼¬¼¹©½»¬½¸®¾º¬º¾­»·¬ºº¬¼¼®¿»¬º¾ª¼º®½Àª¾¼¯¿¼¬Á¾¬½½¬Á¸©¾¼¬Á¼ª¼»­½À­¾¼¬¼»­¾¼¬¾¿¬¾¾¬À¾­À¿®»Á¬¿¼°Á»¬»½®Á¿°Â»­À½°¾¼­Á¾¯Á¿®Â¿­ÀÀ±ÂÁ³¿½°Á½®À¾°ÁÁ¬Á¿¬Á¾®Á¾®Á¾®À»±¿¼¬Á¿®ÀÀ°Á¼±Æ½¯Á¾±ÁÃ²ÂÀ´ÀÁ¯Ã¿²ÁÀ®ÄÁ³ÃÀ³ÁÃ±ÁÁ³ÂÁ±Ä¾°¿Ã³ÂÁ°ÃÁ³ÂÁ³ÅÂ³ÃÂ²ÅÃ´ÁÃ®ÃÂ´ÆÃµÄÀ²ÆÄ³ÇÃ¶ÄÄ³ÇÂµÅÁ®ÅÈ³ÇÂ³ÃÃ±ÅÃ·Å¿³ÇÅ·ÅÂ±ÃÃµÁÂ²ÄÁµÅÆµÃÄ²ÆÅ´ÅÅ´ÈÁ³ÃÅ³ÄÁ´ÄÆ±ÈÂ¶ÄÄ³ÄÄ³ÅÃµÆÈ´ÇÃ´ÆÆ´ÃÅ·ÆÃ°ÆÆ³ÅÄ³ÅÆ·ÅÃ·ÄÄ´ÂÅ³ÆÂµÊÆ³ÅÁ³ÅÆµÇÈ¸ÆÆ¸ÈÆ³ÆÈ¶ÃÆ¸ÅÈµÆÅ³ÆÇ³ÇÄ¹ÆÆ·ÆÆ¶ÆÅµÇÈ·ÅÆ¹ÈÈ¹ÆÈµÆÇºÆÅ¶ÉÆ·ÆÉ·ÅÆ·ÇÈ¶ÈÈµÇÉ²ÆÆ³ÉÃ³ÃÁ¬ÇÂµÈÈ³ÅÊµÆÈ¹ÂÅ¶ÊÈ»ÉÆ¶ÄÄ°ÅÁ²ÀÃ²ÁÀ±À¿¯»· ²ª§ tllniqlozbr]{uf{i{bzgx`~u_{bfiulorxxqkl~k|ioqoqnzizfdzb|kgl~lqowuxx|ztqlqxnxi|ufzrf~qbxrb{ugz{bzzb|rizziz{g|{l{xd{w]zoWwkUoiUugUniSndQqdSg`SkbUgdSibUl_Mf_SddQi`QdbSibUibUnbWgdYkn[on[kr[qw`or_owfq|gui{ox~l~q|l~q|{lzzfrr_xxdru_qzbtt]ol[of_kk]oi[uodu{dwf|ki{i{|in~k~n|zk|ri|{r~uzuqtolub~w_z|izl~i~{n{zk~|l{zk||utno{qz|on~~nxd~k~u_ziWrlWoiYql[qk[ok[qk`z~q¯§®¾¬³Á³¿ÁµÁ¿´ÂÇ·ÂÈ»ÅÌºÊÌ»ÈÌ¾ÉÉ±ÉÂ´ÂÅ³ÆÃ·ÆÊ»ÆË»ÌÌ·ÈË¹ÈÆ·ÇÈ·ÊÊ¸ÊÈ»ÇÊ»ÉÍ¼ËË¼ÉÌ¼ÊÌ»ËÌ¾ÈÌ»ÊÎ»ÉÎ¸ÇÌ½ÊÉ»ÊËºÉÍ»ËË¸ÊÌºÈÊºÇÊ»ËÉ¼ÊÊ¼ÉÈ¹ÈÉºÇÌ¹ËÆ·ÆÈ¹ÈÇ¼ÈÊ»ÊË·ÈÉ¼ÊÇºÈÊºÊÊ¹ÈÈ»ÊÊ¸ÉË»ÌÊ¸ÊÈ»ÈÊµÊË¹ÈÈ¹ÊÈ¹ÈÈ·ÊÈ·ÇÈ¸ÆÈ»ÆÉºÈÉ·ÉÇ¸ÇÇºÆÊ¶ÈÉºÈÈ·ÇÊ·ÈÈºÉÈºÆÊ¹ÆÆºÆÄ·ÄÉ¸ÅÈ¸ÈÆ»ÇÈ¶ÆÆ¹ÊÆºÆÅ·ÄÆ·ÈÇ·ÉÈºÅÄ³ÈÆ·ÆÈ¶ÅÅ·ÄÅ¸ÄÆµÅÆµÆÅ¸ÃÆ¶ÇÄ·ÂÄ´ÈÅ´ÆÂµÆÁ´ÆÅ·ÅÇ¶ÃÄ¶ÆÃ³ÆÅ¶ÆÁ³ÄÆ¶ÃÆ´ÅÁ·ÂÅ¶ÄÃµÂÃ³ÅÇ·ÂÅ´ÃÇ³ÄÁ¶ÅÂ·ÇÃµÃÄµÃÀ²ÃÅ³ÃÂ³ÃÃ¶ÃÄ¶ÃÃ·ÄÃ³ÃÂ·ÂÄ·¿Á³ÁÅ°ÅÃ°½¿·ÆÁ³ÂÀ³Â¿±ÃÃ²¿Ã²ÃÁ´Â¾³ÃÁ³ÁÂµÂÁ°À¾³¿¿¯¿À±Å¿³ÃÁ®ÃÁ³Â¿´ÁÃ±Â¾³ÂÃ³ÃÃ³¾Á°Ã¿³ÃÂ³ÁÃ·ÆÁ·ÀÁ±ÂÁ²ÄÂ¶¿¿¯ÁÁ³ÁÂ°ÀÁ³À¿±ÃÃ³ÂÀ¶ÀÀ´ÁÂ´¿½¯ÁÁ¶ÀÂ±ÂÁ³¾À²ÁÀµ½Á¯ÀÁ³¿Á±¿¾³¿¿°¼¾±Á¾±¾À±À¾®»¿³¼¿±Á¿²Áº±Á¾¯¾¼²¿¾¯¾¿²»»«Á»®Á¾®¿»¯À¿²½¼±¾À°»º¯¾¾®¼¹¯¼º®¾¾«¿¿­»»®¾¹­¼»¯»¼°»»¬»º¯¼¼±¿º¬»¼­¼¸®»¾¬»¹­º¼¯»¼«½¹²¾¹®º¼¬º¶®¼»¬º¸­º»«¹º­»·¬ºº«ººª»»¬¶»¬¼¸­ºº²·º©¼»­¹¸¬¼¹©»ª£°¬¡·­²² µ° ²°£¶°µ±¡¶±£³® ·°¤µ¯ ´®¡·®´­¢µ²¡¶²¥¶°¡µ¯£³°µ°¡µ±¡¶°¢³®£·°¦·²¡·¯¡µ²£·°£¶²£¸±³³¥·¯¤·²£·®¡·´§·® ¹³£·´¹±£»²¤¸µ¡¸²§¸´£·±¤·±£µ³¥¹¶§¶³¦·³¤¹³§¹³£¶²¡¹µ£¸°¤·³¦¹¸¢º´£»µ¦º´¦¹µ¥º¶¨»³¤»´§»·¦º³¦º´¤»²¦º¶¥»³¦ºµ©½¸¦½¸«¸·§»¶¥¹¶©»µ©½·§»³©¾º¦º·©»·¨½¶«½º¦½·¨¾µ©¿¸§¾¸«¾·©½µ§½µ©½¸¦¾·§¾µ©¾¸©¼¸ª¿¼¬¾·¬¾·©Á¸©Á»¬¾¹¬¾¹©¾¹¬¾ºªÀ¼¯¾º§¾½¬¾»¬¾¹ªÀº«À»©À¼¬Â¼¬¾º®À»ª¿¸«¾¸«Àº§¿»ª½»¬Á¾«À¹¬¾»©Á»©Ã»«Áº©¾»¬Á»©Â¸ª¼»¬Ä»®Á»­À¾¬Á¼­Â¾­Ã¾®ÂÀ®Á¼«Ã»­ÄÀ¬Â»®À»¬Ã¿¬Á¾¬ÃÁ¯Á¾¬¿¾¯Ã¾®Ä¾®ÄÀ¯Å¾¯Á¾¯Á¾¯Â¾°Á½°ÆÀ²Æ½°ÂÀ°Ã¿­ÃÀ¬Â¾°Ä¾®É¾±Ã¾¬Ã¾®ÃÁ¯ÁÁ²Ç¿°Á¿®Á¾°ÄÂ®Ã¾°Æ¾®Ä¾±ÃÃ±ÆÀ²Â¼°ÃÀ³ÁÃ³Ã¾¯ÄÁ®Ä¾°Ä¿°ÇÁ¯Æ¿°ÄÂ²ÈÂ´ÆÁ±ÈÁ°ÄÂ°ÅÂ²ÄÁ³Ä¿³ÄÀ®ÄÃ²ÃÀ®ÇÃ°ÆÂ³ÉÁ²ÆÃ®ÃÃ±ÆÄ®ÆÁ°ÄÃ³ÇÃ¯ÆÃ¶ÇÃ´ÈÅ³ÅÃ®ÈÁ±ÆÅ³ÆÁ²ÇÅ±ÆÁ´Ç¾­Ã¾®Á¾­ÆÁ°ÆÃ±ÆÃ³ÈÂ±ÆÄ³ÈÄ°ÁÀ°ÂÁ«½¼ªº·©·±±¨¤wkzgzf~fudxkg{doY{iQ|rYx_|{`|r]ztY~l_|u`z]`{~id|kknnn{of~b{kkgwititf{gx_{b{fzbzb|gzddnrt|qrqkudrb~lbq_t`~tdrYr[|t_xn]~t]{wd~`~_t`w`|w]|n]zkWukYtgQtgQtdQndMl[Qn]Ik[MiWOi[IlYIkYIg_MfYKiYOlYKbYMlWQl_Qk]KkdUlg[q|]qt_wt`xrkzq|nqn|nxf~|kwiwubxnUzf[qkUod_qbUuoQn`Qn`Qq_Sn_Qugduqgzwg|kk|k~wg~wllzgt]|o`|og||oonnzlxg|bu_xwo~td|tkq]zn]wi]zl`wu`zudwi||`{q`ztgz|rn|g|kxk{~g{f~n[z`UtdQw]OqiSodIn_Qu`Yzru³¬°¼¬º¾ª¾»«À¾­ÂÀ³ÂÁ²ÆÅµÇÈ·ËÈ·ÆÈ³ÈÃ¬ÅÀ²ÄÅ³ÅÈ·ÈÆ¸ÈÆ¶ÈÇ³ÊÁ´ÈÁ±ÊÆ¸ÇÆ·ÊÆ·ÉÄ³ÉÆµÊÆ·ÌÉµÈÈ¸ÈÊ¶ÈÇ·ÊÅ¶ÇÇ¶ËÈ¶ÊÅµÇÇ·ÈÄ±ÈÊ´ÌÄ¶ÆÆ¸ÊÇ´ÈÄµÊÇ³ÈÅ³ÉÅµÇÄµÈÅµÇÃ¶ÊÆ·ÉÄ´ÈÃ·ÆÆ·ÆÃ·ÈÇ¹ÉÅ¸ÉÇ³ÄÆ´ÈÅµÈÇµÇÄ·ÆÆµÉÇ´ÊÃ·ÊÃ´ÆÅ³ÈÆ·ÆÁ³ÅÃ³ÆÄ·ÈÅµÇÃµÄÅµÈÁµÆÅµÊÄ³ÅÃµÇÆµÇÂ¶ÆÀ´ÆÁ´ÆÄ³ÈÄµÆÃ´ÇÄ³ÆÁ³ÄÁ³ÆÃ±ÄÃ´ÇÀ¶ÇÃµÆÀ²ÃÁ³Ç½®Æ¿³ÆÁ³ÈÁ±ÆÂ¯Ç¾±Ã¿´Ä¾°Ä¼²ÃÁ³ÆÀ³ÃÃ®Á½³ÆÂ²ÃÃ°ÃÁ¯ÄÃ³Æ¾²ÃÁ°Ã¿®Æ¿¯ÂÀ°ÃÁ±ÁÀ±ÃÁ²ÄÁ°ÄÁ°ÁÁ¯Å¿±ÅÃ°Á»®ÁÁ¯Á¾°Á½®Ã½°Á¾­Á»®Â½¯Á»°Á¾°Â¾®Ã¾¯¿»­Ã¼­Á¾­Á¾°À¼°À½°Ä»®¾½°Â»­Á¾­Áº¯À¼°¾½¬½½°À¸¬À¼®Á¾®¾¼±Á»¬¾Á°¾¸¯¿»«Á¼¯¾¾­Á¼®¾¾°¿»¬Á»¬Á¼¯¾¼¬À¼°À¾«¿»®¾¹«¾¾¬¿»¯¾¾®¿½±Á»°½½¬Á¿«¿¼¬Á¸¬¿¹¯Á¼­¾¼°»»¬¾»¬¾º¬¾¼­½¸ª¿¸«½»®¾»¬¾µ­Á¼¬¾»¬½¸¬¾¹®½¸¬¾º®½¼«¾¹­½º¬½·¬¼¸¬¾·¬»º­¾¼ª»·¬»·«»¸«½»¬¼»ª½¶¨¹·«¼µ¬º¹«»¸©¸·¬»¹§»·©»¶¬»µ«»¸¬»³¨·¸«»¶§»·©·³«º³©»·©º¸¤º´¥·³©º¶¦½¶¦¹¶§º´ª¸´©¸µ¦¶·¦¸µ§¹µ«¸·®»µ«º·§¹¸ª¸­£°²ª´°£¶µ¥µ·¤µ³¥µ´¢´³©µ´©¶µ£¹¶ª¶´¢¶³§¶·¥·²«·¶£¶µª·´¦º´¨¹¶¤¶´¥·´¦¶¶¥µ³§·³ª¶´¨¹µ§··¦·¶§µ·©·µ¨·³§¶µ¥¹·§¹·¨·¶¨¹²¤¸¸§¶¹§º¸©¼¹¥¸º¬··ªº¹¨¹·¨º¹¬º¹¬»·¨··¬º·§¹¼¬½¸ª¸·©»¶«¹¶«º¶ª¹¹©º¹¨»»§¾¹¬¼»«º·¨ººª»º¬»»ª¼¸¬º¹¬»¹¬»º¨»·«»»¬½¸¨»»­»º«¼º¬»¾¬¿¹©½¾¬¾»¬¼»¬½¼©¿º«½»­½¹©¾¼¬½¾®¼¼¬½¹¬»¼«½»­»½¬¼¾ª¼½°À»­À¼­¾¼®À¾²¾º¬¾½²¿¼«¾À¬½¿±¾Á²À¼®½¾­½¾¯ÁÀ¯ÄÀ¯ÀÀ®ÀÀ¯Á¾°ÃÁ­ÀÀ°¿À¯Á¿¯Á¾®¼½°¿¾®ÁÀ­ÃÁ±Â¾°Á¿¯ÁÁ±Á½®¿Á¯ÃÁ°½¿²¿¾±ÁÂ®Å¾°ÂÃ°ÃÁ±ÁÁ¯ÂÁ±ÁÂ¬ÁÂ³Â¾´ÃÃ°ÃÁ³ÃÁ³ÅÆ³ÃÀ³ÁÂ³Ã¿±ÃÂ®ÃÂ¶ÃÆ³ÃÂ³ÅÁ´ÆÅ²ÈÃ³ÇÃ³ÁÁ²ÁÆ´ÃÁ·ÈÁ·ÆÃ±ÄÁ±ÃÅ´ÃÁ¶ÂÂ³ÂÃ·ÃÁ±ÈÂ³ÃÅ´ÅÃµÃÄ´ÂÅ¶ÆÃ´ÈÃ³ÃÆ·ÅÁ³ÂÄ¶ÇÅ´ÅÇ¹ÆÅ±ÆÂ³ÃÃ¶ÈÄ´ÇÂ´ÈÃ³ÆÃµÇÃ³ÅÆ¶ÅÄµÄÆ´ÆÆ´ÈÆ·ÆÅ²ÃÆ´ÅÈ³ÆÃ³ÅÅ·ÂÆµÅÄ¶ÃÇ´ÆÅ·ÇÇ¶ÈÃ·ÆÄµÈÅ·ÆÆ¹ÉÈ»ÄÆµÄÄ·ÈÆ¶ÅÊ·ÇÇ¶ÇÇ¶ÇÆ·ÆÈ·ÆÇ¹ÆÆ´ÅÉ»ÇÅ´ÊÆ³ÄÆ´ÆÇ²ÆÈ¶ÈÅµÅÇ·ÇÆ³ÅÈ´ÄÅ¶ÅÅµÂÄ±¿¿«·®­ ¦o~gngg|iki~u`td|wb|kf~{f|zb~w]~~`zi{f~ilouqnnnuko{ktrziinroklioiuu~wnqlilgiqqllizf~zk~|o||iz~n~zixd|xbzb~z_zxbwx]zx_wtUtrWooWllWooSrnUkiSobQnfUkiSnb]fdQkbUifQkdWni[okYql`ltbo|kxo|l{u~z~|qq~o~fzt]xodoq[tk_og_rn]qoWor_ro_uqYtn_wxbxxkuwt~zulur|l|r~~fzd{tf|tl~{o|qurn~o|i~lrt|gxtfxr_zqbrtbuuiw{izwl~{f{w`zzi|{rq~~t|lr~r{g{tbzn[uk]rkWql]rkUqkU{ri~±§«Á°¶Ã±ÀÇ³Á¾¯ÁÂ¶ÂÄ·ÇÈ¹ÅË¹ÈË·ÈÈºÊË·ÊÅ³ÇÄ¸ÆË¸ÇÊ½ÊÎ·ÌÍºÇÊ¶ÈÆ´ÈÇµÈÊ¸ÊÌ¹ÇÌºÈÉ»ÊÊ»ÊÐ»ËÌ»ÌÍºÈÊ¸ÈË»ÊÎ¾ÊÈ¹ÈË»ÊÊºÊÆ¶ÉÌºÉËºÈÊºÊÌ»ÊÊ¹ÉÇ¸ÈÈ¹ÈË¼ÌË¹ÉÉºÆË»ËÉºÊÈ·ÇÈ»ÇÊ»ËÊ¶ÊÈ¹ÊÆ¶ÉÉ¹ÉÈ¾ÈÇ¹ÊÊ¹ÉÊ½ÉÉºÈÊ¹ÊÇºÈÆºÈÌ·ÈÈºÅË¸ÇÊ·ÈË½ÊÈºËÈ¶ÆÈ¶ÈÈ¹ÇÅ·ÉÈ·ÆÆºÉÊ·ÊÈ¹ÅÇ·ÆÈµÈË¹ÆÉ»ÆÅµÈÆ¸ÆÈ¹ÅÆ¶ÉÄ·ÆË¶ÆÆ¹ÊÆ·ÃÅµÅÆ¹ÊÅ¶ÃÂ¶ÇÅ·ÅÅ·ÇÆ¶ÇÆ·ÃÃµÄÅµÁÅ³ÃÅ¸ÇÅ´ÆÅ¶ÆÃ¶ÇÂ´ÆÈ¶ÅÄ¶ÅÈµÈÂµÆÃ·ÄÆ¸ÆÄ¶ÅÄ¶ÅÁ¶ÃÆ·ÃÂ¶ÅÃ¶ÃÄ¶ÃÁ´ÅÀ³ÅÁ²ÄÃ³ÃÆ·ÆÁ°Á¿³ÁÃ²ÃÃ´ÁÂ±ÃÀ±ÁÂ´ÃÅ¸ÁÃ²ÅÂ²¿À³ÁÀ³¿Á´ÂÁ´ÁÀ³¿Á±ÁÆ³ÂÀ°ÂÁ±ÄÂ¯ÃÁ³Ä¿³ÁÁ³ÁÁ³¿Á®½Á­ÁÁµÁ¾³ÂÂ¯ÃÂ±¿¿³¿¿°À¿±¿Á³ÂÁ³Á¾µÂ¾´Á¿¯ÁÃ³¿Á³¿Á³¿Á±¿Â²Á¾±ÂÁ³Ã¾³½Â²Â¿²Á¾°Á¿°Á¾±¿¿³ÁÁ²ÁÂ´¿À°ÁÂµ¿¾­¾¾±½¾¯ÀÁ²¾¿±À¾°Á¾­¾À¯¾¼±À¿´¿¿³»¾³½Á±¾¾­À»²½¾±»¾²À¾±À¼¯Á¼¯½¾³¼½¯¾¿¯¼»¯¿½®¿À°º¾­¾»¯»½¯»½®»¾®¾½®»¼®»»²ººªÁ»®¼¹¬»»¬ºº°»¸¯¾»¬¹·¬¼»¯ºº®¼»¬»º¬ºº°½¾¬»¹°»¹ª»»ª»»®º·­¹º¯¶¸¬»¾©·¸¬»¸®»º¯»¹¬»½¬¼·¬»«®±´®³® ·°¶¯¡¶¯³° ·¯¢·±·¯¶±¢³¯¡¸¯·­¢µ²³³¹² ·¬ ·¯·²¢¸®¤·²£·²¡·®£»² ·´¡µ°¡¸°»±¡»± ¸²¢¸µ¤µ³¢¹±£¸¯ ¸¶¢¹³¡¸µ¡º²¦¸³ »´¦·²§»µ¦»´¤»µ£·²§¼´§»³¢º·¦»µ£»³¨ºµ¦¾°¥¼³¡»¶¨»³¥¹²¢º³¢»µ¥½´¤»²¥½´¢¹³¦½·¥»µ¦½¶¢¼³«¾µ£º¶¤¾µ©½³¦»µ¤»·¦½µ¦½´¦½¸¨½³£À·©»·¤¼·©¾´§½¹§¼»¨¾¸§¾·ª½·§»¸§À·§¼¸¦½¼©¿¹¦¾·¨À·©À¶¨¾·§Á¸§¾·¥¾¸§¾·«Á·§¿¸¨¾¶ª¾»ª¿¾¨Â¹ªÁº«Á½«Ã»¬Á»«Â¼¬¿»«Ã¹¬Á¼¨Á»¬Á·ªÁ¹ªÁ¹ªÁ»«Â¾«ÁºªÂ¼«Á»¦À¹¨Ã»¬Å½¬Ä»ªÄº©Á»®Æ½ªÁº¬Ã»«Ã¼¬Á¾®ÆÀ®Â¾¬Ä¾¯Ã½«Å¼¬Æ½¬Ã¾°Ç¾²Æ¼¬Ã¾¯ÇÀ°Å¾¯Æ¾¬ÅÀ­Á¾¯ÆÁ²Â¿°ÄÁ®ÈÁ­Å½­Æ»¬Ä¿²Ä½®Æ¿®Ä½¯Ã¾°ÆÁ¯ÀÁ¯ÅÀ­Æ½¬Ã¿«Ä¾«Ã¿­Á¾°ÅÁ°ÆÁ°ÆÁ®ÆÁ°ÆÀªÃ½®Å¾®ÈÃ³ÆÃ²È½¯ÆÃ®ÂÁ¬ÆÁ°ÆÁ°ÇÁ±ÃÀ¯ÇÀ´ÄÁ®ÇÀ°ÆÁ±ÈÁ«Ä¿¯ÄÁ°Æ¾®ÅÀ²É¾°ÆÁ®Ã¾°ÈÀ²ÆÁ°ÆÀ±ÆÁ³ÄÃ°ÈÁ²Ä¾²ÇÆ²Æ¾³ÆÁ°Æ¿°ÆÁ¯ÈÂµÈÃ°ÇÃ±ÆÃ²ÅÃ±ÈÀ¬Ã¿¬ÇÅ³ÈÃ³ÆÁ®ÈÁ³ÈÂ¶ÈÃ±ÄÀ®ÃÁ¬Ã¾¯Ã¸¯¼µ¤·²°£¡ziu_xf`z]|d]n_o[kW~uY~u`~]tYtWrYq]z[|x`t`{_~giidwi~gggtgo`rdli~kzknonigwbtfnqqwx|zunlzg|`wgzixikqqkg`{d~fbgfd~du`|q`l[znUzlYzkWxkWr`SqdOobYq[KnfQofMldSn]Og]On]Ml[Ml[Kl]Ol`Ol_Ot`UrgUto]qq`wrgxk|xnz~nn|gwk{obzkWqfQw]QqdQq`SnbOw]QtlUwiUwq]zqY{q[t[~tbtqnnk{iw_zfwdw`|tbu[xgui|kf|g|kw`~qnrk|qb|lYxnW{kUxgStgUwiY|i`wq]~q_|kWuq`ug~x`~zgtbukozbkS|gW|fStdSubOq`KudUxou³ªµÁ®¸½¬¾Á­Ã¾¬Á½°ÃÀ±ÄÃµÇÃ·ÇÇ³ÉÆ·ÆÆ±ÊÁ°Ä¾³ÆÆ´ÈÈ·ÊÊ·ÆÆ³ÊÃ´ÅÃ³ÊÄ²ÊÄµÇÆµÌÇ·ÈÃºËÇ³ÍÇ·ÌÇ¶ÈÈ·ÎÆµËÇ·ÌÈ·ÊÄµÊÈµÉÄ·ÆÈ·ÌÇ¹ÌÆ¶ÊÄµËÃ³ÊÄ¸ÈÄ³ÆÃµÉÆ³ÊÄ·ÈÆ·ÈÄ¶ÊÆ³ÊÃ·ÈÅ³ÌÅ·ÈÆ´ÈÃ³ÉÄ´ÈÆ³ÈÆµÈÇ·ÊÆ·ÈÄ·ÇÃµÊÆ·ÇÃ³ÈÄµÆÄ³ÆÄ²ÊÄ³ÉÆ¸ÈÃ³ÈÂµÊÆ³ÈÆµÇÆ´ÉÃ²ÈÃ±ÇÄ³ÈÂ³ÅÃ±ÈÅ²ÇÁ²ÇÄµÇÆµÈÁ±ÆÂ³ÆÆ³ÆÁ±ÊÃµÉÁ³ÈÃ³ÇÁ³Å¿µÆÀµÄÁ°ÄÀ³ÆÁ²È¿¯ÃÀ°Æ¾¯ÃÁ°Ã¿³ÄÀ°ÄÁ±ÇÁ±ÇÀ¯ÄÁ²ÄÃ³ÅÁ°Ä¿°ÃÀ°ÄÀ²Æ¾¯ÃÀ°ÃÀ²Ã¿°ÇÁ®Ã½°ÅÁ°ÄÁ°Ã¿°Á¾°ÃÀ­Ä¾²Ä¾¯Ã¾®Ä¾¬Ã¿¬Ã¾®Ã»­ÃÁ°ÁÁ­Ã½­Ã¾®Ä»¯Ã¾®Ã½®Ã»¬À½­Ã½«Á¾­Ä¹©Á½²Ä»¯Á»¬Á»±Ã¹³Ã¾®Á½­Â»­Ã»ª¾»®Ã»°Á¾®Á»®Á»­Ãº­Â¾®Á»°Ã»­Á¼«Â¸¯Á¼«Ãº®Á¼¯Á¼¬Ä¼®Á¹®Á¾«¿¾®Â¼®Ãº¬¿½­¿¿°¿¾®Ã¹®Á½°Á¼¬À»¬¾¹°¿»®¾¸¬¾¾­¾¹­¿¾«¿¼«¾¼®À»¬¾»¬½¸¬¿»­Áº­¾º®¼¹¨½¹¬¾»®¾·¬¾¸«¿¸¬¿º«¿·ª¾µ©¼ºªÁ¹«¾¸©»·©½·«¾¸¨¼´­»¹©½¸ª¾·­Àµª¼·¨¾¹¬¼¸§¾´©¾¶©º¸¦»³«º·¨½·ª»·§¼·©½µª»³§»·©»µ©¾·¬¼·¤»¸ª»´©¸·©»µ¦º·©·¶£¹³¨½µª½¶§¼µ§ºµ©»³¨¸µª¾¯¥³´¦µ¶¨·µ¦·µ¤·´¥´·¨¶´§µ³¤¶²¤´¸¦¶³¤³´£·¶¥¸´§·µ¤¶·¤¸±¨·³©¸µ¥¶´¦¶³¦µ´¦¹µ¨¶´§¹·¨µº¤··¨¸¶§¶¶©¹´©¹¶§·¶«¸º§¶·«¶´­º¶¥¼¶¨¹µ§¶¸©»¶¦½¹¦»¹­¹¶©º·¬º»ªµ¸«»¶©¹µ§»·§¼¸¨»¼§¸¹ª½¶¬¼³¨¹»©»µ©»º¦ºº¬½·¨»»¬¼º¬¼¸­»»ª¼¸­¿·«¼¹¨¾º«¿¸«¼¼¬»¸¬½ºª¼·§¿½¬¾¸¬¾¹«º»©¿º¬¾»­¼¹ª»¸¬¾¹¬¾¾®½º®¼»¬¾¼­¼»¬»¼¬º½®À¼¬À¼±¾½¬¾½­¾¼±¼¿¬Á¼¬Á¹°À»«¼¾­À¾¬¾¾¯À¼®Á¾°¿À¬¿À°Á¼­Á»¯¿¾®¿Á°ÂÁ²Ã½°Á¼¯¿½°Á¿®ÀÀ¯ÁÁ®¾»¬ÁÁ°Â¾³Á¿°Á½¬Ã¾³ÃÁ³Á¼³À¾¬ÂÀ±ÄÁ³Ã¿­Â¿°ÁÁ³ÃÁ´ÄÁ³ÈÀ´ÆÁ´ÅÄ°ÂÃ²ÂÀ´ÂÂ³ÁÁ°ÇÅ°ÂÁ³ÄÂ¯ÅÅ³ÃÂ³ÅÀ³ÁÅ³ÆÁ³ÅÃ³ÆÃ·ÈÅ³ÆÄ´ÂÂ³Å¾´ÃÂ³ÅÃ·ÆÄ¶ÆÁ°ÈÇ³ÁÃµÅÃ³ÃÄ±ÄÃ±ÃÃ²ÆÃ³ÃÂ³ÆÁµÆÁ´ÇÁ±ÂÄ³ÄÅ´ÄÅ·ÃÄ´ÅÁ¶ÄÅ³ÃÁ´ÅÃµÂÃ²ÄÅ³ÆÄ³ÆÅ°ÅÂ·ÆÆ¶ÃÅ³ÈÆ¶ÆÅ³ÅÆ¶ÈÆ³ÅÆ¶ÇÄ³ÄÆ·ÆÆµÆÃ³ÅÅ³ÄÅ´ÄÄ²ÇÅµÅÁ¸ÅÄµÈÆµÈÂ¶ÈÆµÄÆµÆÇ·ÅÇ·ÉÈ¶ÈÇ³ÉÆ·ÄÊ³ÈÈ¸ÈÆ¯ÇÊ·ÃÁ·ÆÃ¶ÃÇ¶ÄÅ³ËÅ¶ÅÅ³ÈÇ³ÇÅ·ÆÈ¸ÉÊ¶ÁÇ¶ÅÃ±Ä¾ªº½¨··¦³¯¬£|tk|ikkfgudw[~wi{klf{fzbu_zb|df{k{kqntlqnql|oi~zfdooqoltlogorz~zwwwqunutqrutwnooou~wqtnig~|`|t`xr`rrWuq]wdYqf]ofSofWldSodUnbYkk[gbOniQkbSk`WliWkgWif_rl[ol`nugtzdz~nzor{|tnzxd{r`wu_uo[tk[uo[rl_qnWwn[ql`uqdxk~k|l|izk{rx{qqqoq|onn~|lqnntb~xd{nfxtfzn`wlbrnWok[qi[tl[ur_on`wubttbxxgzwg{l~nt{o|n{l~tbxk]zg]rk_nkUukYnlWrqf|¡¦¦Á´µÃ®ºÁ´½Ã²ÁÄ°ÁÀ°ÆÆ¶ÃÈ¶ÅË´ÊÊ¸ÈÈ¶ÊÃµÈÇ³ÃÄ·ÆÈ·ÈÍ½ÈÊ»ÈÉ¾ÈÉµÆÆºÇÉ»ÊÉ»ÊÊ»ÈÈ½ÎË¸ÌÌ½ÉË¹ÈÈ¼ÊÌ»ÊÌ·ÌÊ»ÉÊ¶ÈÌ»ÍÊ¹ÊÉ»ËÈ¼ÊÇ·ÈÉ¹ÊÊ·ËÈ»ÈÆ·ÈË»ÇÆ»ÉË·ÉÈºÉÇºÈÆ¸ÉÌ¸ÊÊ»ÊÎ·ÊÈ·ÉÆ»ÈÊ¹ÇÊºËÈ·ÈÊºËË·ÆÆ»ÊÇºÇÈ¶ÈÈ¸ÆÈ·ÇÆ¹ÆÅ¹ËÇ¹ÊÈ¶ÇÇºÊÈ»ÆÈ·ÈÈºÉÈ¹ÊÈ¸ÆÈ·ÉÈ¹ÆÈ·ÇÇ·ÈÇ¹ÈÆ·ÈÃµÈÆ·ËÇ¹ÄÈ¸ÅÈ¸ÈÅºÈÈ³ÅÅ¸ÈÅ²ÈÅ¶ÇÇ·ÅÇ¹ÇÆ´ÅÄ³ÆÃ·ÈÇ·ÈÆ³ÆÄµÆÅ¶ÃÂ·ÅÃµÆÂ·ÅÃµÇÅµÅÃ³ÃÃµÁÃµÅÄ³ÃÅ¶ÃÀµÈÃ¶ÆÆ´ÅÃ³ÅÃ³ÁÄµÅÃ·ÆÃ¶ÅÆ¶ÃÃ³ÆÆ¶ÂÂµÂÁ³ÃÃ³ÃÂ²ÂÃ±ÅÃ²ÃÂµÄÂ³ÂÂ¶ÅÁ³ÃÁ³Â¿°ÂÂ°Á¿±ÁÁ³ÃÀ³ÆÀ®ÁÀ±¾Ã³ÁÀ®¾Á±Ã¿´ÁÂ±¿ÀµÃÀ³ÂÀ³¿Á³Ã¾³Á¾±ÁÁ¯ÁÀ²ÁÀ³ÀÃ³Â¼³ÂÀ´¿À°¿¿²Á¾¯ÁÂ´Ã¾´ÁÁ³Æ¾³¾¿±ÁÁ¯¿Á³¿»²ÃÁ´¼À±ÂÁ³Á¾²ÀÀ³Á¿±¿Á±ÁÁ³ÁÀ²¾À³Á¾¯¿¿±½½·¿À²¿À³¾¾³Á¿±¾½°¿½±À¿¯Â¿´Â¾³Á»°¾»±¾¼³¿½¯½¾±¾Á­¿¾¯¾»³¾½±¾¾¯¼¼­Á¾®¼¼±¿¼°¿½ª¾¾­¾¼¬¼¼°½º±½º°»¼±»¼°¾¼±¾½°¼º­º¼­º¼­»¹­»·¬»¹¯º½®»º«¾¹­»º¬»¼¬»·®»¸®¹¶¬º¹¯¼»¬»·«¹¶­¹º¯¹·ª¹º¨»¹¨¶º­»¹¬»º¬¹»¬¸¸­»º¬»·¬·«¡¯®¡´­·¯¡¸®¶­¡·®µ®¡´²¢³¯¸®´±¡³³£¸° ¶° µ²¥·°¢µ° µ±·²£º±·±£µ³¢¸±·°¡¸³¢´²£·¯·¯£·³¦¸³¡¹²£¹± ¸³ ·¬ º¯·³ ¹²£·³¢¸µ¡»²¥¸°¡¸µ£½³£º³£»³¥»³£¸¸¨»±¤»µ£½³¤·±¤»³¨½µ¥»µ¤¾²¤¾´¡»³£»µ¤º³¢»·§¾·¦»±¤¼´§¾µ¥»³¦½¶¥½·¦¸·¤»²£»·¤º¶©½·¥¼³¤½²¢½¸¥¾·¢À¶¥½´¥¾·¥½·©¿¸©¼¸¦»·¤½µ¦½¸¦¿·¦»¹§¾º¦½»ªÁ·¨¾·ª¿¸§½·«¿¶¥½¸§¾º§À¸¨¾·©¾¼¦¾¶©¿·«¿»ªÂ»«Á¹©Á½¨Á»©¾¹«Á½¬Àº©Â»¯À·¨À»¬À¹ªÀº¬Áº«Â»¨Á»«¿º¬Á»©Á¼­Ã»­¾»¬Â»­Á½«Ã»¨Á¼¬Ã»§À»«Ã½¨Å¹¬Á»­Ã»¬Á¾¬Ãº®Â¾®Å½ªÃ»«Ä¿®Á¾¬ÆÁ°Æ»¬Ä¿®Å¼¬Â¾°ÅÁ°Ä¾®ÇÁ°Å¾¬Ã¾°Ä¾¬Ä½¯ÄÀ¬Æ»¯ÄÀ¬Ä¾±ÆÀ¯Ã»­Ä¾®Æ½­Ä¾¬Æ¿®Â¾¯ÅÀ±Å¿­ÃÁ«ÆÁ­ÇÀ¯ÃÀ°Ç¿°Ä¾®ÄÁ²Æ¾°ÆÀ¬ÄÁ­ÇÀ°ÆÁ®ÅÁ°Å¾¯È¾°Ã¾±Æ¾®ÃÀ®ÆÃ°Æ½²ÅÁ±Æ¾«ÁÁ²ÈÁ®É¾±ÈÀ¯ÅÁ³ÆÁ°ÇÁ²ÇÁ¬ÃÁ¯ÈÀ²ÇÁ°ÆÃ²ÈÃ±ÆÂ±ÅÁ¯ÆÃ®ÆÃ¯ÈÃ°ÇÁ±ÇÀ³ÅÃ³ÇÂ²ÇÁ¯ÇÀ³ÊÀ°ÆÁ°ÈÃ°ÆÁ®ÅÂ´ÆÆ³Æ¾±ÄÃ³ÈÁ²Â¿®Ã½­½·«»¸«¶·³©©¡¡~nx`zfg{fg`o_tSznWx`iix`uY~x_tUt[~~bzbzd~qigxggf|gtfq_tgw_t]rd`{l|f|dxd~dw`|_~gqruzw{wnqwzutniig|g{fxdxdo]t`wd~ufxdxgwbzd|{b~tbzqY|n[zkUzkQulQwiOu_Mq`Io[KoUIk[IfUInWIkYIlYKi_OgYOn_On]IkfMn]SnfUqgYrq_zr`wgoqwwq{grd{k[xdUudOtnUxlQufStgQtdUwrS{t`|n|k~g`z`xktn|iznugululubti|zggi~gxf{dtdtb~qYxl[zfWukQufUrfUwgUqdWtbMrbMtgQtkUudYwn[wn`ztbztn{wk~lxfq_r`{qUz`Wx`Mr_Qq`Oq`KqbUxnb®¨¯¾¯»Á°ÁÁª¿¼©À½«Á¾­Ä¾²ÆÄµÄÆ²ÈÄ°Æ¿°ÅÂ¯È¿®ÂÀ²ÇÆµÈÈ´ÊÆ³ÉÈ·ÉÃ³ÇÁ³ÊÇ·ÊÆ·ÉÉ·ÌÆ·ÈÄ³ÌÆ¶ÊÈ¶ÌÆ¶ÊÆ³ÌÅºÍÊ¸ËÃ·ÉÄµÊÆ²ÊÆ¶ÌÅµÊÃ¶ËÄ¶ÈÇµÊÃµÌÇµÊÇ´ÈÄ³ÆÂ·ËÇ²ÇÃ´ÆÆ³ÈÁ·ÊÄ³ÊÃ´ÊÃ²ÊÄµÈÂ³ÇÆ³ÊÆµÄÄµÊÅµÉÈ´ÈÅ²ÈÃ´ÉÁµÇÅ²ÇÁ²ÇÅµÈÃ¶ÈÅ²ÆÁ·ÉÄ³ÇÄ³ÊÆµÈÅ³ÈÆ²ÇÁ³ÇÃµÈÀ³ÆÄ±ÆÃ·ÊÃ³ÈÄ³ÈÀ´ÈÄ²ÆÄ´ÆÃ°ÆÁ³ÈÂ³ÅÁ³ÊÄµÈÃ¯ÆÃ³ÆÃ²ÆÄ°ÃÁ¶Ç¾®ÆÀ³ÄÁ±ÄÁ°Æ¿®ÃÃ¯ÆÁ²Â½¯ÄÁ¯ÄÁ´ÆÀ®ÃÁ®Â¼¯ÄÁ°Æ¾®Ã¾¯Å¿¬ÅÀ²Ä¿°Ã»¯Ä¾³Ä¾°Â¿®È¿°Á¿¯Æ¿°Æ¾¬Ã½­ÅÀ¯Á¾°Å½®Á½°Ä¼¬Á¾²Ã½®Ã½®Á½¬À¼²Á»ªÁ»«Ã¾¬À½®Æ½®Â½«Ã½¬À¿¬Á»°Ã¹®Ã¾¬À¾®Ã¼«Á¾«À¼°Ã»ªÁ»­Â¼ªÂ»®¿¾¬À¹®Á»¬¿º­Á¾­Á¼±À»«Ã¿¬À¼­À½¬À½­Àº¬Á»®À¾©Á»²Ã¾¬¾À¯Ã½°Àº®¿»¬Á½²Â¼­Ã¾®Â»¬¿º«¾»¬¾»¬Á·°½»­¾¼¬Àº¯¾º«¿»«½»¬À¹¬¾¹«¾»¬¿»«¾¸«À¹¬¾¹¬¾»ª¼µ¬Á¹¬½¸ª½¸§¾¸¬Á¸ªº¼­À¹©¾¸«½»¨½º¨½¸¬¿¸ª»¶©¼·©À¶«º·«¾·©¾·¬¾¹«¾º©»³¥º·¨½´ªº·¬»µª¼·§»¸¦½»¨¼¶©¼·ª¹¶«º·©¼µ§¸¶©»µ¥¼´ª»¶§½µ¦»¶§¹¶¨¸µ¨»·¥¼³¦»µ§»³¥¹µ¨¹®¤³µ¤µ´¦´³¤·µ¦µµ¤´µ¥µ³¦·³¦³¶¥·¶¥µ³£´³¥µµ¤¶µ¥¸¶¨¶³§·¶§·´©·°§·µ¤¶³ª¸¶¨·³£·µ§¸µ¦´¸©¶´¥¶³¨·¹©¼µª·³¥¸µ¥¹·§·´¦»·ª»·¨¼·«¹·«º³§¸ºª»¹¨··¬»¶©º¸§¼·©¼·¦»µ«¹¹«·ºª¾¹©»µ©¹´¦»·¬¾º©»´©¹·©¼¶¥»¸¨»º¨»¼¦»ºªº»ª¾¹ª»·«»º¬»»¬½»¬º¹©¾¹ªº¹®¿·¬»¸¬¾¸­¹»©½¼¬¾¼¬¿¹ª½»­Áº®»¸®¾»¬»»«½»¬¼¼¬Â»­¼¼­À½ªÀ½­¾º°¾½®¾»«¼»©»º¬Â»«¼¹¬»¼®¿»ªº¿¬¾¼¬Á»­ÀÀ±¾Á³Â»¬À¾­À¿¯Ã½±À¾¬Ã½°ÁÀ¬Á¾±ÁÁªÁ¿°Â¿¬¿À±Á¾°Ã¹¬Á¾¯Ã¾¯ÁÀ¯Ã¾¯ÀÀ°Á¿¯Â¿®¿¾¯Á¾±ÂÀ³Â¾¯Â¼¯ÁÁ°ÂÁ²ÂÁ³Ã¿®ÄÀµÃÁ°ÅÃ°ÃÁ®Á¾°ÈÃ´Ä¿³ÆÄµÆÃ³ÃÂ²ÅÂ³ÅÄ°ÆÇ³ÃÁ¶ÄÁ³ÇÃµÃÃ±ÅÃ³ÁÁ³ÃÃ³ÈÅ²ÆÃ³ÅÅµÈÁ´ÄÃ³ÄÃ³ÅÁ±ÃÂ²ÅÂµÅÂµÆÁ³ÄÁ´Ä¿³ÆÁ¶ÂÂ±ÂÄ´ÈÆ³ÃÂ°ÃÁ±ÅÀµÄÃ³ÆÆ·ÅÃ·ÅÃ³ÃÃµÆÂµÈÃ³ÆÆ³ÂÄ´ÇÇµÆÃ³ÄÃ´ÅÆ³ÃÄ³ÇÃ·ÊÅ´ÅÂµÅÅ´ÆÅ²ÈÃ³ÇÅ¶ÆÆµÈÅ²ÆÆ·ÈÇ¶ÆÆµÊÂ´ÇÃµÈÇ¶ÆÆ¶ÈÄ·ÉÆ¹ÆÃ·ÇÂ·ÅÅ³ÈÈ·ÃÃ´ÈÄµÇÁ·ÆÃ¶ÆÅ¶ÈÆ¶ÈÃ·ÈÄ·ÆÆ·ÅÃ´ÆÅ³ÂÂ­Á¼¯ºÂ¬¹¹§³¬ª|o|gwdinnk{`u`{ubzfqr{ow_{`|xg~{d~{gzi|glwrrqn~ogktfxkui|iki~iognnlqtxwzz~z{{|wrqi|dwg~g~i|{bxb|~b|{`z~i{{_wudz|kznzb{z_uwfzzbuu]xq`uq[tn_tl_ukYql[niQoiYn_QnbQi_Sk`Qd]Si_Sn_QibUn`UflWnfYkf]niUoi]uqbwxgwu|rzuk{zizi_zo_uiYqt_ql_un]tkWwqbuudx~l|olroorrxtgfiwiwi|~n~xkuwoo{l|xgwb{u`tq_ri_uq[tnbtl]ugUoiYrn`rf[tb[qq[un]ok`uo[qudxr_urkxo~n|l|wf~zdzo`xiUqbWngWqgSngQqf_uww  ¹®³Á·»È´ÃÇ°Á¾°ÂÃ¬Á¾²ÄÁ·ÅÊ¸ÅÇµÅÃ³ÆÃ´ÉÊ³ÈÃ¶ÄÅ¸ÆÈ¸ÈÈ»ÊÊ¹ÊÈºÈÈ¹ÊÊ¹ÈÉ·ÈÈºÎÊ¼ËÍ¼ÊÊ»ÊÊºÊÉ¹ÊÈ¹ÌÃ¼ËË¸ÈÈ¹ÈÈ»ÎÊ¹ÊÇ¹ÊÌ¾ÍË¹ÇÈ·ÅÊ»ÊÈ¹ÈË¸ÈÆ¹ÉÅ·ËÈºÇÉ¼ÊÊ·ÈÌ·ÅÈ»ÈÈ¶ÊÉµÇÈ·ÈÈ»ÈÈ¸ÈÊ·ÈÆ¸ÉÊ¹ÉÈ¶ÌÉºÉÊ¹ÊÅºÈÆ·ÈÅ¹ÆÈ¶ÆÈºÊÈ¹ÆÌ·ÈÈ·ÈÉ·ÆÆ¸ÊÈ»ÊÇ¶ÈÌ·ÈÆ´ÈÈ·ÅÈ´ÆÅºÇÈ»ÊÆ¸ÄÊµÈÈ·ÆÈºÉÊºÇÈºÈÈ¹ÈÇ¸ÈÅ³ÇÆ¸ÆÄ³ÃÄ·ÊÅ¶ÄÅ¶ÆÆ·ÅÄ¸ÄÅ¶ÅÅ´ÅÅ¶ÇÆµÅÃ·ÄÅ·ÆÅ¶ÃÆ´ÆÁ·ÆÁ³ÄÄ¸ÆÃ´ÃÃ¶ÁÁ³ÄÂ³ÅÃ¶ÄÂ·ÆÂµÅÅ°ÄÅµÃÂ¶ÃÁ´ÆÄ³ÃÁ´ÃÅ±ÃÁµÃÂ°ÄÀ³ÂÁ³ÄÂ¶ÃÁ³¿ÁµÅÁ³ÁÁ°ÂÁ²ÁÀ³ÁÁ³¿Á¯ÁÁ¯ÁÀ°Â¾±ÃÁ³ÀÀ²ÅÅ±ÁÀ±ÂÀ³Á¿³ÆÂ³¿¼±Á¿±ÁÁ²Â¿³¿¾²¿¾¯¾Á°ÄÀ±Á¾¯¿¾µÀÀ²À¿²Â¿³Á¾´¿Á³ÂÁ±Á¾°¾¾²ÀÁ±¿¾²ÀÃ²¾À°Á¿³ÁÂ²¾¾±ÁÀ²ÀÁ±Á¾°¾½³Á¼°¿¿²¾¿³¿¾¯¼À²¿¾¯¿À³Ã¾³¿½±¿¿³À¾°À»±Â½³À»°¾¾°¾¾±Á½­¿¼¯Á¼°»¼¯¾»¯¼¹±¼¾®¼»²¿¿®¾¾±½»­¿»±¼¸°»»®¾½­¾»±¼»±¾½®¼»­¾º­»¼¯½»­º¼¬º»°»»«½»±»¹¬»¼®»»¯½½°¼º­¾¹¬¹º¬¹»¬»¸­»¼ª»¹­¼·ª»º®¹¹¯»¸¬·»®¹»­¼¶«»·¬¼»­º¹®¼¹­¸¶­¸¶­»·©º¹¬¹©°°µ°²±£¸°¡·°¸®µ±µ¯¡¶°¡µ°¢µ° ´®µ­µ²·³¢³® »± ·¯£¶¯¡¹¯·²£¸¯ µ°£º®¡¸±£»°¢·²¡¸­¶°¢¸µ¤¸²¡·¯¡º³ º³¢»°¦¸³¡¹³¡¹²¢»µ£º²¤»²¡»µ¢¸´©¸²¢»±¢»²¤º¶¤¼³¤»µ£¸³£»´§¸´¥»²¤··¤¼µ¥»²¡¹³¢º¶¤ºµª¾²£»´¦»µ§»µ¢½³§º³¥º¶¥¼²§¼³¢»´¨¼´¥¼´¦¼µ¥¼´¤½µ¥»¶¤½·§¾·§¹¶¥»¸§½³¥¾·§½·¥¾·¨¼·©¾·¦¾·¦¾¸§¾¸©¾¹§¾µ«¾·¦¾¹¥¾¶§¾·ª¿»¦À¶¦¼¸©½º©¿·ª¾¸«¿º¨¾»©Á¸¨¾»«¾·¬Á·«Âº¨Á¹©À¹«¾º¬Á»©Ãº¬Âº©À·©¾½ªÁº¦Áº«Â¹«Á·¬Á¹«À»©À¼«Â½ªÁ»¬À¼ªÁ»«Á¼©Á¼©Â¼°Á»©ÁÀ¬Ä¼¬Æ»­Ã¾®Â»­Ä½¬ÃÁ«Æ½¬Ã¾°Ã¼¬Á»®Ä»¬Ç¾°Å½°ÄÁ¬Ä¿¬ÄÀ¬Å¿®Å¾¯Ã½¯Æ¾±Ã¾®Ä½¬Ä¿¬ÃÁ¬ÈÀ¬ÅÀ¬Â¾®Æ¿®Æ½¬Ä½¬Ä¿°ÃÁ¯È¿¬Ã¾­ÆÁ­ÄÀ­Ç¿¯ÆÁ±Ä¾®ÃÂ«Å¿¬ÇÀ¯Ã¿¯ÅÁ±ÅÁ°ÄÁ®ÇÂ²ÇÃ²ÄÁ°È¾«ÃÁ±Å¾¯ÄÁ®ÆÂ°ÆÀ¬ÄÁ±ÄÁ³ÆÁ±ÃÂ­ÅÃ±ÆÃ³ÅÂ¯ÇÁ­ÈÁ°ÆÄ­ÅÃ°ÈÃ²ÈÁ²ÄÂ°ÄÂ±ÆÃ²ÅÁ±ÆÃ°ÅÃ¯ÆÃ²ÆÂ²ÈÄ®ÄÂ­Ç¿®ÅÁ¬ÄÆ±ÆÂ³ÈÀ±ÅÁ¯ÇÃ²ÅÁ¬Á¾¬Á¾¬½º§»»§¸·£³¤¦uk|_t_{_zig~`t`nUgSqUtbbw`w]|tWoWu]~uYrYk[|zkg|d|gzdxbtdt_uft`~ubwbff`xbw_zb|fkdiinqnontklonkkzg~bz_z`zY|u_~wY{tWxqU~q[zqW|rY{rW{wYzx`zr_xk`zq[uq[zqW|uWxqUxnUwgQwiUnnQziWtgOrkMrfIofKo_InYInYFnUFk]IibMn[OffQqiUoiUulWuiYulUwg]xwg|lnw|xtd|_nWwiMzdOufSobUwbOtiOrgYwnYxt_z{kqlxkl|k{izgu`xg|ffxdu]q[zn[zlb~|rwo{dzt]n_wkSwdOtgSufWugUtgWwbMqfQtfQrgQt`MqkUrdMwiOtdUqgYtgSwlWxr`~u`r_u`|q[|lU~bSu]Ow]Mr_UrbMrdOxg`¢¥©¼¬¸¾²ÁÂ³ÃÃ±Ã½±ÄÃ¬Ä½¯ÄÀ°ÇÅ±ÆÅ­ÇÀ°ÈÆ³ÉÄ¨È»°ÄÃ°ÂÄ°ÇÈ¶ÉÈ¸ÊÆ´ÇÃ³ÊÆ³ÈÇ·ÌÄ¶ÊÊµÊÆ·ÈÅ¸ÊÈ¶ÌÈ·ÈÇ·ÉÅ³ÉÈµÇÄµËÆ·ÉÅ²ÊÃ³ÈÆµÉÃ³ÌÆ´ËÈ³ÊÃ³ÅÄ³ÈÆ³ÈÄµÈÆµÈÂ±ÊÅ·ÈÃ±ÊÄµÊÅµÇÃ¶ÈÆµÈÅ³ÊÅ´ÊÄµÉÁ³ÉÅ³ÇÆ·ÇÄ¶ÈÄµÌÃ¶ÆÃµÊÁ³ÉÁµÆÃ³ÇÃµÉÄ²ÈÄ±ÈÁ²ÆÅ´ÈÂ´ÉÃ³ÅÃµÈÄµÇÃ´ÉÃ³ÊÃ³ÉÄ°ÈÃ³ÄÁ±ÉÄ²ÆÁ³ÆÃ´ÇÁ°ÈÁ³ÆÃ°ÆÀ®ÃÂ´Æ¾¬ÇÁ²ÆÂ°ÆÁ²Ä¿°ÈÁ¯ÅÁ°ÄÀ²Ä¾²ÅÀ°Ä¾°ÈÁ°Ã½®ÄÁ²Æ¾²ÆÁ¬ÆÀ²Ã½­Å¿¬Á¾­Ã¾°Æ¾¬ÄÁ®Ã½°Ã¾®Å¿²Ä¿°Ä½¬¾»¯Ã¾±Ä¿°Ã¿«Ã½²Ã¾­Ä¾®Ã½°Å½®Á¾¬Å¾®Å½¬¾½¬ÂÀ­Ã»¬Á¿®Á»¯Ã¾«Á¿¬Á½ªÅº«ÀÀ°Ã»¬Ã»­Â»©Ã»­Á»¬¿»­À·ªÀ»®Ã½®Â½­Á½¯¿¼­Á»ª¿¹­Áº¯¿»­Ãº¬¾»¬Ã¼¬¾»¬Á¸®Ã»¬Á»®À¾®Á¾¬À¼«Á¹¬Á½¬Á¼¯Á»®Ãº¬À¾®¿¹ª¾½«¿¹­½½«Âº¬¾º­Á·ª¾»©Áº¬¾»«Á¸ªÀ»«Á»°Á»©»À¯¾·©¾½ª¾¼«½¶«¾»®Á¸¬»º¬Á¹§¾»ª¾¹¬¾·©½¹¬»¶¬½¸¨¼º¨¼·©¼¹­½¹ª¼¸¢½·ª¼·¨¾¹ª»·ª»¶ª»¹¨¹·©¾¶©¼·§ºº¦¼¶©¾·¨¶µ§»·¨º¶¤º´¨·µ§º²§¼³§»·ª½µ¥¸¶¨·³§·µ¨·¶§¹´§·´¦º´©»³¥»¶«»³©¹²¨»µ§·µ§¹ª¨®±£³³¦¶µ¥µ³¥´³¤·´¨·´¦³´£·µ¥·µ¦·³¤¸µ¤·³¤¹µ§¹³¥·³¤·µ¦··¤·³¨º´¦¸µ§··¥¸´¨¶³§·¶§½¶§º·ª·²£¶·¥·µ¨¸¶¨»¶©µ·¨»³¬·¶¥¹¹¥·¹¬»·«»¹§»·©»¹«»¹ª·¹¬»µ¦·¶§º¹¬»µ«»·©¼¹ª¸¶«¸·ªº¹£º·¬»¸¨¼¸­»µ«º»§º·«¼¶«º·«½·©½¼ªº»«¾º­½º«¼·¥»¹¬½¹©¸»¨»¸©¼·«¼¹­»»¨¾¹¬¾·ª»¹¬¼»¯½¹©¿º§»¹®»»ª½»¯¿»©¼º¬»¼¬¾·¬Á¾®¾»ª¿¼­¿¾¯¾¼ª¿º­¿»®Á·«½»ª¿»ªÀ»ª¾¼¯Á»±¾¼­¿¼­½¾®½½²Á¾¬À»®¾¾¯Ã»°ÂÁ²À¾¯Â¼°Â¾¯¾¾®ÀÁ²Á»°¾¼¯Á¼­ÁÀ®ÁÀ±Â½°ÁÁ¯Á¾®Á¾®Â½°Á¿³ÆÀ°Á¿³Å¾¬Ã¾°ÀÀ³Ã¾³ÁÁ±ÄÀ´ÂÁ³ÅÁ±Æ¿³ÁÀ±ÀÂ¯ÇÁ³ÃÃ±ÆÄ´ÅÁ¯ÆÅµÇÁ³Â¾¯ÃÃµÆÁ²ÆÁµÄÂ³ÃÃ³ÅÃ·ÄÂ²ÃÂ®ÅÂ±Ã¾³ÅÂ³ÆÂ´ÃÃ¶ÆÁµÆÃ±ÆÂ³ÆÁ²ÅÆ´ÆÆ´ÃÁ³ÆÂ´ÃÂµÆÂ²ÈÆ·ÇÆ´ÅÁµÃÃ³ÃÄ²ÈÃ³ÆÅ´ÆÄ³ÈÁ´ÆÉ´ÇÃ¶ÆÇ³ÇÅ³ÆÇ³ÇÆ´ÅÅ´ÃÃ´ÄÅ´ÇÆ²ÆÄ±ÆÅ³ÊÃ¶ÆÅ´ÇÅµÆÆ³ÈÃ³ÃÅ³ÆÅ´ÅÈ¹ÇÄµÆÃ³ÉÅ·ÇÅ²ÆÄ³ÈÆ·ÊÄ´ÇÈ¶ÆÉ³ÉÆ·ÃÆµÅÅµÅÂ·ÆÆ´ÈÈ¶ÇÄ¶ÇÇ¶ÈÈ·ÅÃ±ÇÃ²ÂÁ¯ÃÃ¬¿»¬¾½­¸»¢¶¥¬wi{fbkqn|dud~r_zq[wf~k~i{f]{{_~zdg|ubtf~lzq~oi{f~zn{nxfwfilqul~ig{iirorwqorooowtqnokkog~{d|zg|udzu`wub{t_wx_zr_tt[to[qq]uo`unbtk[ti[lo]ti[qn[ru`tx_uw_wt[un]ri_uq`oo`wu_wn]oo`rkUofSngSnbUf`SigYlgYkq]oz`qtgqziuk{{k~|i{znxu{z{xqg|xbxnWti]olUnk]rqUuq_uob{wdw{louuu{ui{lqb{uo{{oq{ol~{bzw`{q`zogz{ttk~l|nbwlYui[rk]tf]rn[oiYqlYqf[tlUqfYriUqg_okUqiUwn]ri_uiYuk`zq_z{fwxd{wi|{i{|f{w`xfUuoUuk]ri[qoYtf]zxr´³±Ã³¹É¸ÆÎ¹ÆÆ³ÇÂ³ÅÇ°ÇÆ¹ÈÈ¹ÆËµÆÆ´ÈÊºÈÈ·ÇÃ´Æ¿³ÅÆ·ÈÇ»ÃÈ·ÆÉºÊÈ¸ÊÅ´ËÆ¹ÊÇ·ËÊ·ËÊ¾ÊÊ»ËÈ»ÊÊºÈÉ»ÍË»ÉÊºÊÈ·ÉÈºÊÆµÃÉ¾ÌÊ¸ÉÆ¶ÉÈºÈÈ·ËÈ·ËÈºÆÆ¸ÈÈ¹ÌÈ¹ÈÈºÈÇ¹ÊÈ·ÈÊ·ÊÉ¹ÈÈ·ÉÊ¹ÉÉ¸ÉÈ¸ÈÅ·ÇÊ¹ÌÉ·ËÇ·ÆÇºÈÆ·ÉÈ»ÊÈºÊÆ¶ÈÊ·ÆÈ´ÊÅ·ÆÆ¹ÊÅ»ÆÈ·ÇÉºÈÈ¶ÇÈ·ÊÈ¶ÈÆºÉÆ¸ÇÊ¸ÈÇ»ÊÉ¶ÅÆ·ËÇºÉÆ·ÈË·ÇÈ¹ÈÃ·ÉÄ¸ÆÃ³ÈÅ¸ÃÈ³ÅÃµÊÆ¶ÃÃ³ÆÆ·ÆÃµËÂµÊÅ¸ÆÃ¶ÆÆ·ÃÃ³ÆÄ³ÆÅ³ÃÃ¶ÇÆ¶ÃÄµÅÅ±ÅÁ´ÅÂ³ÆÁ³ÅÅ¶ÃÆ¶ÆÁ´ÅÃ±ÅÂ¶ÆÅµÄÁ³ÃÃ³ÄÂ±ÄÁ³ÃÁ¶ÃÃµÁÁ±ÂÃ´ÇÂ²ÅÀµÃÁ³ÅÁµÁÁ³ÁÃ³ÅÂ³ÁÀ³ÃÃ³ÃÁ³ÁÃ¯ÂÁµÁ¿°Á¿°À¿¯ÀÁ³ÁÀµÁ¾²Ã¿³ÃÁ°ÁÀ²Á¾°ÃÁ´ÁÁ³Á¿³ÃÁ²Á¿²ÀÀ°Â¿¶ÁÁ®Ã»°ÀÁ³Á»±¾½³ÁÀ²À¾³À¾±Ã¾±¿Á´¿Á²ÂÁ³¾À³¿¿±¿¾³Á¿¯Ã¾¯À¾±¿Á®½¿²À¿°Á¿´Á¿±ÀÀ³À¼³ÁÁ±¿¾³Á½³À½®½¿°¿Á¯Á¾¬¾»°¿¾°¼½®¾»¯Á¾³»¾®À»°¿¿±¿¾¯½»¯½¿°»»¬»»±¼»¬¿¼­»¼®¿¼¯Àº­¼»°¼º­½¹­»¿«¿¼­¼·®¼»¯»¹­»»­¾¹­¼»®¾»®»½¬¾º¬»¹¬¸»¬»»®¼·±»¹¬º»¬¼·¬»¹§¼¸®¼º­»¹­·»ªº¸°ºº¬½¸­»»¬»¸­¹¹¬»¹¬¹¼¬»·©¹·®¹º¬º¸¬º©¯®µ®³¯¡²± ²°³® ³³ ´± ³²µ­·±¡´®¶°¡¶²¡µ³¡·±³¯·±¡¶±¡¹° ¶®¡µ¯·± ·±¤·²·°¢»°£´¯·±¡·±³´¡¸²¤¸³µ³¤¸²£¾³¢»±¢¸µ¢¶µ¢º³¡¹´¤·³¥·¸¡º²¥¸²£º³¤·´·µ¤¹² ¸³¤·³¢¹´¡µ³·²§»²¢·³§·³¥¸¶£¸·¦º³§»·£·µ¤º´¥¹µ¦·´§»µ¥¹´¥»³©¸´£¹¸§º·£º¶¥¼´¥¾³¢»¹ª¼·§¼µ¦¼·¥ºµ§½·¦¼´¦½µ¥¼¸¨»¹¨½¹¦½¹¤½º©¹¹¥¿¶¥½·«¾·§¼·ª¾·¥»³¦¼¸¦½¹§»³¨¾·§¾½§¾¸§¾¸©½»§¾»«¾»«À·§¾·¨½º©¿»©¿¼«Àºª¿¸­½½§¾»ªÀ·©¾»©½¼¬¾¹«Ã»¨¿º«¾¹¨Àº¬¾º¬¿»ª¾½©¿¸¬À¼¨Á»ª¾½¬¿¸¦¿¼¬À½ªÁ½¬Á¾­Á½ªÂº­Á¾®Á¼¬Å»¬Á¾¬Á¹¬Â½¬Ã»«À¾¯¿½¬Á½­Å¾¬Ã½­Á¾­Ã¾­Á»°Ä½®ÃÁ®Ã½­Á¾­ÃÁ®Á»ªÃ¿®ÃÀ®Ã¾¬ÄÀ­Á¾«Á¿ªÁ½°Ã¿®Â¾¯Á½¬Ã¾²ÁÂ³Æ½®ÄÂ¬ÃÁ¬Ã¿­Ä¾®ÆÀ­ÅÃ¬ÄÁ²Å½±ÄÁ¯ÅÀ±ÅÂ«Ä¿°Æ¿¯ÅÁ±Æ¼¬Â¿³Ä¿¯ÃÃ°ÃÃ°ÃÃ°Æ¾°ÆÁ¯ÃÃ³Å¾¬Â¾°ÆÁ®ÅÁ³ÅÃ´ÄÁ®Æ¾²È¿¯ÅÃ±ÆÁ®ÄÃ²ÃÂµÆÃ³ÁÁ°ÄÁ¯Æ»°Ã¾­ÃÀ®ÅÂ±ÇÃ°ÃÂ®ÆÁ¯ÄÁ®Á¿¬Ä»¨¾·¦º·¦µ°³¤§ ¢zkdu[~``gbz[nW~oUrU{{[|`z_u[|qUrYzY~tb~|_~r]wbgkzgudzb~tgx_|`x]zfdgxdzd~z`q_z``|b~b{gf~dgxfgfkg|igd`zd{b~|_{]zuYxnQqoUxkQqrUrkWwoQqlUqgUqgMrgOodKqbKlgQldMr`Ml`QlfIi[Sn`MnbQqdSoiUogQoiSogMqbQqiUrlYqgMl`Ok_MibKl`OkbOi]Ik]Ol`SqlSq~]wxd~{i{f|g~fnzwzwrg~|d|w`zoWtnUrgQrgMqiYqfSriUriUuqU{wd~zlwixd~n|uk{kq`oW~oYwnY|n`tqbto]wt_wnSwgQtbUrk]qq_xubxzYznWx`KugOqbOq]QngMkfQq`ModQl`Fq`Oq`In_Kk`SokQtiOqdSq`QwnOtf[uq[{l[ut[xn`xrb{k[wn[wkStbOr[QrdMqfQwiW|u{£¤´¬¶¼³¼Ç²ÃÄ³ÆÀ±Å¾°ÅÀ±ÅÄ³ÆÂ±ÃÁ±ÃÅ³ÆÅ´ÄÅµÇ¿¬Ã¾²ÃÇ³ÆÂ·ÆÈ²ÉÇ³ÅÈ·ÉÅ³ÇÇ³ÈÄ³ÃÄ²ÉÄ³ÈÂ´ÆÈ³ÊÅ¶ÈÄ¶ÊÈ³ÇÇ³ÈÃ´ÇÆ²ÈÃ´ÈÆ´ÅÃ°ÈÆµÆÅµÉÄ³ÇÇ¶ÈÂ¶ÆÄ²ÇÅ²ÆÆµÆÄ³ÉÄ´ÈÃ´ÇÆ´ÈÇ³ÇÃ´ÈÅ³ÈÆ´ÈÈ³ÃÃ³ÈÂ³ÆÆ±ÈÃ³ÈÄ°ÆÅ³ÆÄ´ÈÄ³ÆÃ±ÃÄ°ÈÄ¶ÇÅµÅÃ´ÆÅ°ÅÆ²ÇÃ³ÆÁ³ÄÃµÈÂ·ÆÃ±ÇÄ³ÃÅµÅÅµÇÂ³ÇÃ²ÅÂ´ÈÃ°ÆÄ³Ã¿´ÃÂ°ÄÆ²ÃÁ³ÇÃ°ÆÂ¯ÃÃ³ÆÂ²Ä¾³ÆÃ³Á¾³ÇÁ¬ÂÀ±Ã¿³ÈÁ±ÂÁ¯Ã¾®Æ¾­ÇÀ®ÃÁ®Ä¿±ÃÀ¬¾À®Ä»¬ÁÁ­Ã¾¯ÂÁ±ÃÀ²Ã½°ÃÁ®ÂÁ­Â¼¯Ã¾®Ã¿®Â¿²Ä¿±Ã¿¬Ã¼°Á½¯Ä¾¬Â½«Ã½­Â»®À»®À¾ª¾¾ªÁ½®Á»®Á½¬Á½¬¾»±Á»®¿½«Á»¯Á½°¿½«À»«¾¸«¾½¬Á»«Á¾«Á½®¾»­À»¬À½©¿»­¿½¬¿½¬¿»«Áº®¿¼¬¾¹­¾¸¨»»­½»®À¼®¾»¯Àº¬¾¾°Ã»¬¿½¬¾»®½»¬½»«¾»ª¾º«¾½°Á»«»½¬¾º­¿¿«½·¬¼·©»¹¬¾¸®¿¼¬¾º¬¾¸¬¾»«»ºª¾¸©½¹¬½º«¾¼©ºº©½¹«¾·¬»»«»¶«¼¶«º·§¼»©¾·ª½¸¬º¶ª¼·«¾»«»·©¸·¨º¹©¼·©¾¸«½¶©¼¶ª··©¹³¬»¹©º·¨º³¨½·«½¹©¸µ«º³§»·¦»¶¨º·©»¶¥º³¤·µ¦ºµ§º´§º´§»·¥·µ¤··§ºµ¦ºµ§º¶«¸´¤¸µ¥¶¶¨¹µ¥·´¦¸´§»³¦¹ª¤®¶¦¸°±³¢¶´¥µ´¤¶¶¤·µ§·¶§¶´¦·¶§¹µ¥¸³§¸³§·´¤³³©¶µ£µ³§¹µ§·³¨¶¶¥³´¨··¬¹µ§¹µ©·µ§¶¶©»³¤·²¥·µ¤¹¶«¸¶¥·µ¨¹¶¨··¨¸³§»µ§º·¬·¹¬º·©º²¬·¹¬·¸¨¹·¤¹µ¤¹º©»¸©»¹¨·¸§º¶«¹¶¬»·­¹¸§»º¨º¸ªº·ª¹¸¨»¹­»·§»¹¬¼·¨¸»¬»¹ª¼·­¼·©··¬½»¬¼¹©¿»­»¹­½·¬»¸ªº»¬½¹¬¾»©ºº¬¼¸¬¼»®¿½­½·¬¿»¬¼¸ª½½¬¿»¬»º®½¹®Á¿¬¾º¬À»­½¹¯¾¾«¿¹°¾»¬»º¬¾»«½¼­¾»«½º­¾¼®»½¬¾À«¿»°ÁÁ®À»¯À¼­¿¿±¿¾®À¼¯ÀÀ¯¿¼¬¿½³Á¼®ÁÁ¬ÂÃ®À½±ÃÁ®¿À°Ã¾¯ÁÁ¬Â¾®ÁÀ­Ã¾°Á½²ÀÁ­ÅÁ²ÃÁ¬ÂÁ°ÁÀ¯Á»¬Â¼°Â¿°Ä¾¯Â¿°Á¾³Å¾³ÁÂ­ÆÀ°ÄÃ³ÂÃ³ÂÂ²ÂÂ´ÃÀ­ÆÁ³ÅÁ±ÂÁ³ÁÃ²ÆÁ´ÅÁµÂÁ±ÅÃ³ÃÃµÂÁ³ÃÃ³ÂÂ´ÅÃ³ÆÀ´ÂÃ°ÅÀ°ÂÃ²ÅÃ³ÂÃ´ÅÀ°ÆÄ¶ÂÂ±ÈÂ°ÆÀ³ÂÁ³ÈÀ²ÆÅ·ÅÂ´ÅÂ³ÅÅ³ÃÃ¶ÆÅ¶ÅÅµÆÆ¶ÆÃ³ÅÂ¶ÅÅ³ÈÃµÅÆµÆÅ³ÅÅ¶ÆÃ³ÅÂ³ÇÃ¶ÆÆ¶ÄÃ³ÇÆ¶ÈÆ·ÇÇ¶ÆÅ¶ÇÆ·ÈÆ´ÆÂ´ÆÃ³ÆÆµÇÆµÊÈ¸ÇÆ³ÅÃ·ÄÆ·ÉÄ´ÅÆµÅÃ·ÆÆµÆÃ¶ÂÁ¯ÂÅ®ÄÂ³ÆÂ¶ÄÃ³ÆÃ³ÅÈ³ÆÅ¸ÆÂ®Á¾²¿¿¯¾¼«··¡·ª«¬¤¥ xk~bxionrfubr`buon{b|`ub{`~d{xdzo{{gotrl~~nqnkliktoiz_ziflnloqnnnrqxronnonki{_~tdwr`ukYor]unWqgYld`rk[qgYofYoiYqfWqk[rdSq]SqbWr]SnfUkiQnfUodUndUob[lkWniYlkYllUrlYnnYtk]qi]rkWokWlfWli[qk[ikWolYnkUqn`r|nun~wtwrw|tnx`wrbwr_wzduo]rn_tq]uo_tr[wt_xof||f|kkl{nqr~n{nzb|nb{lb{o]wrbuofrodwu_tl[ni`qnYriduogwizzfxl[tr[ln]tkWolYqiWui]qnWqiUllWqoUugSlg_li]nq[qiWwiYnn]rq_rugwtdwwbxufwtf|xbxt`{o[rlYuqYwbUql_to[{ld¥§¥Á®ºÇ·ÃÅ·ÆÈ¶ÆÇ³ÇÈ¶ÇÅµÆÈ³ÇÃ¹ÆÊ¹ËÈºÆÌ¼ÎÇ³ÆÅ²ÅÁ³ÈÊºÆË¼ÈÊ½ÊÌ¹ËÈ»ËÊ¼ÉÇ»ËÌ»ÊÊ¹ÈÊ¼ÍÍºÉÉ¼ËÈ¾ÊÌ¸ÉÊ»ÌÊ¹ÊÈ·ÈÉ¸ÉÈ¸ËË»ÉË¸ÆÈºÈÈ·ÈÈ¶ÉÈ¹ÈË¶ËÊ¹ÊÊ»ÈÈ·ÈÊ·ÊÈ·ÉÆ·ÈÅ¸ÌÇ·ÈÈ¸ÈÉºÈÈ·ÆÃ¹ÊÇ¸ÈÊºÇÆ¸ÉÈ¹ÇÅ»ÈÊ¸ÈÅ»ÈÈ¹ÅÈ·ÆÇ¹ÅÆºÆÈ¸ÊÄºÈÈ·ÇÆµÆÇ¸ÆÇ»ÌÆ·ÃÆ´ÇÈ¹ÇÈ¼ÈÈºÊÄµÆÈ·ÆÇ¹ÉÈ¹ÇÈµÇÆ·ÈÇ´ÈÅ³ÇÅ·ÆÆ·ÇÆ¸ÅÅ·ÃÃ¸ÄÄ³ÈÆ¸ÃÅ·ÈÈ³ÃÁ³ÆÈ·ÆÆµÅÃ¸ÅÃ´ÃÁ³ÄÂµÄÄ´ÆÂ²ÃÃ²ÅÃ³Å¾¶ÂÄ¯ÅÂ´ÆÃ³ÆÁ´ÂÁ»ÅÇ¶ÆÃµÄÁµÅÃ³ÃÂ¶ÆÅµÅÀ·ÆÀ³ÃÃµÂÃ³ÂÀ³ÃÀ±ÄÃ²ÄÀ³¿À·ÁÁ³ÃÁ³ÂÀ±ÃÁ¯ÀÂ³ÂÂ³À¾°ÁÀ³¾Á±ÂÁ³Ä¿¯Â¿³¾¾¯À¿±Â¿±¿¿®ÁÂ³Â¾°ÂÀ±Á¾±ÃÁ²À½³ÁÁ²¾½³ÁÁ´À¿²Á¾±ÁÀ°ÁÁ³À¿³Á¾¯À¿±ÀÁ³Á½³ÀÀ²ÃÁ³¿Á±Á¿´ÀÀ³¾¿±ÀÁ°Â¾³À¾³Á¾³Ã¾¯¿¾²ÁÂ³À¼³Á¿°¿¾³¾¾±Á¾¯¾½±À¾°Â¼±¿¾°½»³¼¿²¾¾®¾À³À¿­¿¾¯»º³¿»®½»­¾»¯¼»®»º¬»»¬¾»²¿»¬¼¹­»¾²¾»¯½»³¿½¯¼¼¯»¹¯¼»®¼º¬»»¬»¼¯¿¸¬¼¹ª»¹­»·®»»³¾·¬·¸ª½¼©º¹¯¸»«¼»®ººª¸·¬¹»©»·­»¹­»¹ª¹·¬¸¸¬¼½ª¹¹°»¶¬¼·®¼·¬º·«¸º¦¶¸¬º»®»·¬»©²­³¬³°¡µ¬¤µ®³°³± ·°¢·­ ´² µ² ²¯¶¯´¬´¯¸°¡·¬µ°¤µ°²±¤·³´¯¶³£·°£¸°¤¶±¢µ²¡·³¢³°£·±¡·² µ±£µ®¶±£·¶¢¹±¤¹³¢´¯ ·³©»³¢¶³¦·±¢·µ£»²¤´²¹²¤¸³£¹²¤·²£¸³¢»³¢»³¦º³¦¸³©»²¤»·¥º³¤·³¤¹·£»±§»µ£»³·´¦º´¤¸³¥»³¤¸³¤¸¶¥»·¥¼³¤¾¶¡»´§»²§»µ¤¸·¥º·©»µªºµ£¹¸§»¶£»¶§»¸£¹´©½·§º·¨¾´§¼»£»¶ª¼µ©½¶ª»¸§¿·©½´¤»µ©½µ¥½»¥½·¨»´ª½·¥»º©¾»§¾·«¾»«Á¸®¾»¬¿ºªÀ¾«Á»ªÀ»¥½¸©Áº§À»«¿¸­À»«Á¼¨½½«¾»«Á¸¦Á»ªÁ¼«Á¼¨½¸§¾½«¾º¯¾¹©Àº¬Ã¸­½¹§¿¹¦¿»«¿¹ªÁº«¾½­Á½¬¾»«À»ªÁ¹ªÁ¼¬Ä½®Á½®Æº«Á¿ªÄ»«Ã¾«Ã¼­Ãº¬Á¾®Â»¬¿½¬Á¾¬Â¿­¿½®Ã½«Á¾®ÅÁ¯Ã¿°Á¾¬Á½©Á½­ÄÂ®Ã½®Ã¾®Ã¾­Ã¾¬Ã½«À»®ÃÁ®Æ½®Â¼®Á¿°ÆÁ®ÆÀ¬ÄÀ²Æ¾°ÂÃ¬ÃÁ°ÄÀ®ÆÁ®ÅÃ²ÃÁ°Æ¿®Á¾°ÆÃ¯ÆÀ°ÃÁ³Æ¾³ÄÂ²Ä½°ÆÁ±ÂÃ°Æ¿°Ä¿°Ç¾°ÃÁ±ÆÃ°ÅÁ¬ÄÃ®ÆÁ°ÆÁ¯ÃÁ¯ÅÁ­Å½®ÃÁ®Æ½¯Ã¾¬Ã¹ªÂ½©ÄÀ®ÅÁ«ÃÁ¬Ã¾®Ä¾®Ã½­Á¾­ÄÀ«¿»©½¶§¸·µ«©¨¬¤w{frWoUudlkwftY~kQ~qU{iqo{`t[{Yx]u_znQ|nUt_~zf{]wi~`x`{f|zbwg|wbu]wbif|`u]t`bg{b|g~fb|b{`kglnqnfd{b~b`u`q]ugSodQn`InfKo[On]KobOqgMq]Mn]Ml_IoYKo`KqWInYMo]Il_Ko`Ig]Ig`Kf_Mo_IkbIi[OldKqbMn[IobSngOngOtgQngIn_On_Ko`Io`KrdSkdMnfQogWtnYwq[w|gnt{w|uzttqdx]q[zgUwgYwoUukSrkQuqStfUunY{rUugWxn]{l]zo_w_xdkn`tgz_~qY{nYwiUtfMqdOogQqdMogSrgQt`Mo]QlbWrk`rx_tgUtgSqgQqbSq`Kl_OtdOodOobMogSqbOkbInYFn]Mg`Ko_OndOqbQt`SqgWuiYunYwr[zq[uuYwqYuiSukMqdQt`KtbOtgUxkQwrd²§®½¯»Æ´ÂÊµÅÁ³ÆÁ³ÆÁ²ÃÈ®Ã¿±ÄÃ±ÆÆ´ÆÈºÇÆ·ÈÃ¬Æ½®ÃÁ´ÄÃ´ÃÈµÇÉ»ÊÊ³ÉÄ³ÊÈ·ÈÈµÇÈ´ÉÇ·ÉÆ´ÇÉ´ÇÈ¶ÇÅ·ÊÇ³ÊÆ´ÈÈ·ÇÆ´ÊÇ·ÆÆµÊÆ·ÇÇµÇÃ³ÈÇ³ÈÃ²ÆÄµÈÃµÇÈ´ÇÄ¶ÈÃ²ÆÄ²ÇÃµÊÄ¯ÈÆ´ÄÃ²ÈÈµÈÅ²ÇÄ´ÆÃ³ÅÃ³ÊÃ¶ÆÄ³ÇÃ¶ÈÈ³ÇÅµÇÂ´ÇÃ³ÇÆ±ÈÃ³ÇÃ³ÅÄ³ÆÁ²ÇÅ°ÆÄµÆÄ²ÅÂ³ÄÆ³ÆÂ´ÆÄ²ÅÆ¶ÃÃ²ÇÅµÈÄ²ÇÃµÆÁ°ÄÁµÇÃ´ÇÁµÄÁ²ÃÃ±Ä¾®ÄÃµÅÃ¯Å¿²Ç¾­ÁÁ®ÄÂ±Â¾¬ÁÀ²ÃÁ±ÆÄ²Ã½®Â¾¯ÃÁ²ÁÀ±ÂÁ®Ä¾¯Ä¾±ÆÂ±ÃÀ°Â¾°Ã¾±Å¿®Ã¾°Á½°¿Á¯Á¾°À¾°Â½³ÁÁ°Ã½¯ÃÀ¬Ã¾¯Ã¿°Á¼°Á»­¿¼¯Á¾³À½«Á¿­¿¾¯Á¾¬¾¼®Ã¾¬Á¹«¾¸¬Á¾¬À¾«¾½¯½»¬Â»ª¾º«¾»«¾»¬¾»ªÁ»®À½®¾¾­¾º¬¾»©»»«¿½±Áº«¾¾ª½»¬À»¬À¼®¿º­½¸¬Á»¬Á¾¬Á¼®Á»ªÀ¼­»¾®À»ªÀº¬¾»«Á¾¬Á¿°Á¹¬¿»­¾º«¾¼­½¸¬¼»«¾¾¬¿¸¬¼¹ª¾»«¼»­À¸«¼º¬½¹«À·ª¼·«»»¨¼ºª¾º®¾¹¬¾¹«½·¬¾¹¬½¸«»¹©¿·¦¾¸¬¾·§»·ª¹·§¾¸§»¸©»·¨¾»¦»µ¬º·«½¸©»·§»µ«½¸¨¹·©»·§½¶§º¶ªºµ«¼·§º´¥º·¨»µ©º·¨º·©º·¨»¶©»¶¦¸µ¦¹·§¹µ¥·²¦º´¦¸·§··§¸·¦ºµ§·´¥·´ª¸µ©¸¶©¸µ¤¸³§¸¶¦º¬¡¬²¤´´¥¶³¤µ´§¶³¢¸¶¤¸´¤ºµ£¶´¦¶´¨¶µ¦µ²§¶¸£³´¦¸¸¦¹´§··¡¸µ©¹·¦µ³ª·¹§·¶¥µ¶§»¹§¸·¨·¸¨¸¶§·µ¦·¸ª¹¶¬¹·§¸¶©º·¥¹·ª¶´©¸·§º¸¨ºº©º´§¼¶¨¾µ¬¸¹©»º¥··ªºº¬¹¸©º¶§¹·¦º¸§»¹©º¹¬¹¸©¹¸¨¹¹ª·¹§¸º¬º¹©º¹«¸º§··«»¹«¼¸¥»º¬º¹¨¹º¬¼·¬¹´«»»ª»·¨¾»¬½¹«¹»ª»»ª½µ¨¾¼­»¹¬¾»®¿¼«¾»©»½¬¼º©¼»®¿º¬»º¬¾»¨½¿­Â»¬»º¯¾·ª½¼¬Á»¬¼½¬Á¼«¼¾¬Á»¬¾»«Á¼¯À»¬À¾®¿À­¿¾¯ÂÀ³Á¾­¾½³Á»®À¿¯À¾®Á»±Á¿¬¿Á­À¾®Á¿³ÃÀ¯¾½«ÁÁ­À½¯¿»²Á¾®¿½¯¿¾­ÀÀ«ÁÁ®Á¾°ÂÀ°À¿¯Ã¾±À¾¯¿Á®Á¿¯ÁÁ¯À¾±¿¿²ÀÁ°À¾®ÂÃ²Ã¿°ÁÀ³ÄÃ³ÃÁ³ÄÂ³ÃÂ³ÂÂ²ÆÃ³ÆÁ³ÄÂ²ÂÃ¯ÄÂ°ÁÃ³ÃÂ²ÈÂ³ÅÃ³ÅÀ±ÇÂ³ÅÄ²ÆÁ³ÃÂµÆÂ·ÄÃ­ÄÂ³ÁÂ²ÃÃµÅÄ´ÆÂ¯ÆÁ´ÅÄ±Å¿³ÂÁµÃÆ³ÄÂ³ÃÅ³ÅÅµÆÃ²ÆÂ³ÅÄ²ÅÄµÄÃ´ÆÄ¶ÅÆµÄÃ´ÅÇ¶ÅÃ³ÅÃ´ÊÂ³ÉÄµÄÆµÅÃ·ÇÆ±ÆÄ·ÅÇ´ÈÆ¶ÆÆ´ÇÄ´ÆÆ´ÊÈµÆÅ²ÇÃ³ÇÈµÃÅ·ÅÅ³ÃÆ³ÄÃ²ÆÆµÅÅ±ÅÇ²ÄÃ±ÃÄµÁÆ³ÆÆ³ÈÈ·ÈÆ¸ÄÆ±ÆÄ´ÆÆ±ÁÁ°Ã¾®À½¬¹·¦·±¬¬¦¦¥l|dz_llrlz_w`|u`~|ioxtid|d{_fx`{d~kg{iif{zkzg|ud|~i~lknll|kflrololnoo{w{uwnookd{zd|u]tq]qgSnfWn_Wk`Mi`Yl`Unl[qk]niWuqUuo]rn[tt[rnWtnWolSni[rlUrkQlkUngYokWliYng]noSrkUnnWnlYriUrn[qn]nrWroWqkYqiSolYnoWoo]tu_rq`ufzgzw{¡¬¬°¥~q|ng||b~{`~rbuu[tz]toWwu`wk_xxdzzb{{d|f~i{okqwwolo|i{f{u]xl]roYwf[qkUod_tb[rlYqi]kgWri[tuglu]qr_rq[rk[rgSoiSngUklYoiYlnUoiYqiSk`Wq`SniQqi[olYnl[oo[tn]uo[qwbwu]wxixubwqbwtbzoWrlUrfYui[qub{u`zud|¦¤§»¯µÃ³¼È¸ÄÈµÂÆ·ÆÇ±ÈÆ·ÃÇ¶ÇÆ¹ÅÊ·ÈÌ»ËË»ÇË¹ÊÆ³ÅÂ±ÆÆºÆË½ÊÊ¸ÉÊºÇÎºÌË¼ÌÍ¶ÉÉ¸ÉË¹ÊË»ËÉ¹ÈÈ¹ËÊ»ÊÉºÊÌ¸ÌÊ»ÌË¹ÊÌ¹ÊÉ»ÌÆ¸ÊÈ¸ÊÉ»ÈÊ·ËÊ¸ÈÉ¼ÊÎ·ÈÉºÈÈºÌÉºÈÊºÈË»ÉÆ³ÇÈ¸ËÈ»ÌÉ»ÊÈ·ÈÊ¼ÉÈ·ÈÈ¶ÉÈ·ÆÆ»ÇÈ¸ÉÈ·ËÈ¸ÇÆºÉÇ·ÈÇ·ÉÈ·ÈË·ÉÊ¼ÈÈ¶ÄÆ·ÈÊ¹ÉÈºÈÉ·ÈÇ¸ÈÈ¹ÉÉ¸ÊÈ¶ÈÆ·ÉÈ»ÆÆ»ÆÈ¹ÇÆ¶ÈË¹ÈÇ´ÈÅµÆÃ¶ÆÅ·ÉÅ·ÅÆ¶ÉÃ·ÈÆ·ÅÆ´ÆÄ±ÇÃµÃÄ²ÃÃ¸ÈÃ´ÄÅ·ÈÁµÅÄ³ÅÃ¶ÃÁ³ÃÆ¸ÃÄµÄÃ¶ÄÁ·ÃÃµÂÄ´ÅÃ´ÆÂ²ÄÃ¶ÅÄµÇÃ´ÇÀ³ÃÁ³¾Á´ÅÂµÂÃ¶ÂÅ¶ÃÂ³Ã¿´ÆÃ´ÁÁ±ÁÃ¯ÃÀ²ÁÃ²ÃÁ³ÁÁ´Æ¾±Á½³ÂÂ®ÁÀ±¾À¯ÃÀ°ÀÃ°ÀÀ²Â¾¯¿Á°ÀÀ¯¿Ã³ÁÁ³¾¿³¿ÀµÀÁ¯ÁÅ³ÀÀ°À¿¯ÁÀ°Á¿²ÂÁ²¾¿²ÂÁ°½¿°Á¾²¾À´¾À³ÀÀ¬ÁÂ¬¾Á²Â¿°ÁÀ³ÂÁ³¿Â±ÁÁ³ÃÀ³ÁÀ°ÀÂ°Á¿°ÀÀ²À¿°Á¿±ÂÁ²ÁÀ±¿¿±Á¾±À¿°¿¾³Â¾­¿À²¿Á´ÁÃ±¿½±¾¾¯¿¼¬À¾²¾¾°¾½²Á¿¯¾¾®¾¼±¼¾¯¾¼®Á¾¯¿¼­»¼¬¾¾³Á½¬ÁÀ¬º¾­½»°¾»­¹»¯»½±¿½°½¼®»º±½¹«»¼«»ºª¼¼¬¹¾°¾º­½¹¬»¹¬¾¼®¹»¬»¼¬¹¸°¼»¯º»®»¼¬¹·­»»«¹¹¬º·­¹»¬·º¬»»¬¹¸«¸º©¹¸­¹¼­·¶«»º­»¹¯º»­¹º°¼¥®®´ª ³­¡¸®µ°¢´®µ­ ´°¸®µ­´¯¡µ®µ¯¢µ®µ²¡·°¡³²¡µ±µ± ·±´± ·²¶°£µ± µ±·³¡¶³¡¸° ·²´¯ µ³¡µµ£º´ ·±¤·´·³¢·´¡¶³£¸³¡·³·¶¢·³¤¸´£»²º³¦·³¡¹µ¢¸°¥º±¢»± º´¢¶³¥¹³£ºµ¤¸°¤º²¢¹·¨¸±¢·²¥¹¶¦»´¦¼²£»²¦¹²¡»³£¸µ¦¸µ¦¹µ§¹³£»³¤ºµ¤¸´¦»²§»³£º´¥»·¥»¸¤¸µ¨º·¦¹µ¤¾·¬»¶¥»·©º·¥¾µ¦º·¤»µ¥¾·¥¼´¨¾¶§»¹©¼·¦¾´¦»²¤»¸¨¾¶§¾·ª¼¸©½·§¾¸¥¾¼¬¾¸©¾ºªÀ¼«»·¨¾»§¾¸«¾»¬À»§¼¹©¾¹§Á»«½º«¾º­¿»«¾»©À»ª¾»¬Á¹«½ºª¿¸§À»«Á¼«Á¹ªÀ»¦¿¹§À»¬¾¿©Áº©À·«À¾¬Á½¬¾½ªÁ¾¨¿»®Á½®Á¼­À»¬Á¿ªÀ½«Ãº¬Á½«ÄÀ­Ã¾®Â»«Á¼¬À¿¬Ã½¯Å½±Á¿¬Â»¬ÃÁ­Æ»±Á¾«¿¾­Ã»¬Â¾¬Ã¾«Å¾­Ã¾ªÃ¿¯Á¾©Á¾­Â¾¯ÃÀ®Á¾©ÁÃ°Ã¿®Ä¾®Ã½°Æ¾­Ä¿¬Ã¿­Â¾­ÄÀ®ÃÀ°ÇÁ²Ã¿±ÆÂ¬È¿³Ç¾¯ÄÃ¬ÄÃ²ÆÃ±Æ¾®Ä½®ÃÁ¯ÄÁ¯ÆÀ­ÄÁ¯ÅÁ¯ÅÄ²ÈÀ±ÄÀ¯ÆÁ¯Ã¿°ÅÀ¬ÄÁ±ÈÁ²ÄÀ³ÇÀ®ÄÃ°Æ¿®Ã½¬À¾¬ÂÀ±ÁÃ­ÇÀ³ÇÁ­ÄÀ­ÂÁ­ÄÂ¬Á½¯¿¿©¾Á¥¼·³¦­¤¥x|iwYqY|]dgz`w[|lOzoQw_fg~i{`x`x`u]q[|n[|k`zfz]~t`~u[tYzkUzo[~rW|w`zgdd{iz_x`~dg~gt_xdbkikltlkiifzg`{]tUtiSnYKqWMn[Mq]FoUDkUDqWIlUKoYOq_Kq`SrdUt`UtdSrbYl`QqfMt`QqiSldOndOn`On`OnYKl[OnbFngSnbQngMq`SobKlkMqdQrdOlfUogKrdOt`OngSndSndMtgWqnbug{r| ³µ½¢¥tiwird{x[zqUxqUzlUwlQwnYxqQqoYxt[{w]||]zfiilknzkinnbx`qYziQtgStbMqbMqdOqdKk`MqgMn_Mn]MqfQnbQndSngYrdQodMrdOl_Mt`Mo]QkbOl]On`Ml`Mk[IiWKifMl`MngSqgQo]SobQofQtfQtkYwnYulUuiYrlIwbQqbOq`QqgYuo]|qWzt`¨ ©À¬µÀ­½Ä°ÆÅ²ÄÁ³Å¾±ÁÁ¬ÂÂ­ÆÁµÇÆµÈÄ´ÇÆµÇÃ°ÆÁ±ÄÄ³ÇÅ´ÈÆ¸ÈÈ·ÇÈ²ÈÄ¸ÈÃ·ÈÆ³ÇÇµÈÆ·ÈÈ³ÊÆ³ÅÆ´ÈÆ¶ÊÆ¶ÊÆ³ËÃ³ÈÄ³ÊÈµÊÆµÉÇ³ÆÄ³ÄÊ·ÊÇ´ÈÄµÆÄµÇÄ¶ÉÄ³ÆÅµÇÁ³ÈÃ²ÆÁ³ÇÃ²ÈÃ³ÆÃ³ÈÃ²ÅÄ±ÅÂ²ÇÂ³ÆÆ·ÈÃ´ÅÃ³ÇÃ´ÆÆ³ÆÁ°ÆÃ±ÆÃ²ÆÁ¶ÉÀ³ÆÄ°ÅÄ´ÆÁ´ÇÃ²ÄÁµÈÃ°ÅÃ²ÆÄ´ÇÁ°ÈÁ²ÄÄµÊÁ°ÆÃ³ÇÄ´ÅÃ´ÆÃ±ÆÁ²ÆÂ³ÄÁ´ÄÂ¯ÄÁ®ÆÁ²ÄÁ³Â¾²Æ¾¯Á¿®Æ¾²ÄÀ±Ã¿¯ÃÀ±ÃÁ°Ã»¯Ä¾°Ã¿®ÅÀ³Ä½®ÃÀ±ÃÁ²Æ¾³Ã¼²Ä½±Ä¿°Å½¬Ã¾¯Æ½°Á¼«Ã¾­Á¼ªÂ¿®Á¾²Á»®Á¾±Ã¿¬ÁÀ®Ã»°Â½­Á»«Á½®Á½«¿»¬À½«Á»­Á»«¾¼ªÀ¾¬¿½¬Ã½­Á»¬¾»¬¾»ª¾»¬¿½«À¸§¾»¬¾¹¬¿¸¬Ã»«Á»­½¾ª½¸¬Á½«À»¬¾º«¾»¬¾¼¨¿º«¿¹®»¼«¼»¬¾¼®À¹¬¾º«Á¼¬½½¬¾¼­¾¹¬¾»ª»»¯¼º­À»¬À»¯¾»­¿½¬»·ª¾ºª¾»¬¿º¬¾»ª¾ºª¸¹­Ã¹©½½«¼¹§¾»©½·®»»ª»¶«Á¸«½¸©½¸ªº¹«¾º¬¾»¬º¸©½·«¼·«½·©»µ«»¸­º¸¨»¸¬¼¶¦»¸¨¼¸§»¶¨»¸­¼·ªº¶ª½·«»´©»¸©¹´«¼¶§ºµ©·µ©»·©»µ§¸µ§·³¨¾³§»¶§·¶£¸³§¹µ§µ²ª¹´¨¹³¥¶³§¹³§ºµ¥´µ¤¹±¨µ¶¬¹³¥º³©¹µ§¸¶§·°¥¸³§·¶¨»¬¡¯´¤¶³¡·´¦¶³¡³µ¤·µ£µ¶¤¶±¥¸³¢¶¶¡³´¥³³¤¶µ§¶·¦¶³¨¹¶§³´§··¨·µ¦¹´¨¶¶¥»¹¨¶¶¥¹¶§´·¨»·©¸³¦µ¶¦·¶ª·´¦·¶¨¹¹¨¸·ª»¶ª¹·¨·¸©¸·§¹·¬ºº¥¸·©»»§º¶¨º¶«¹·©»·¨¹¸©»º£¹¸¦·»ª»¶©¹ºª¸¸¨½¹¬¹¹«»·§»·©»·©¸º«º·¬»¹©¹»¬¼¸§º»®¼·¦º·ª¸»©»»ª»»¬¾¹§¼º«»·®»º¨»»¬Àº¨½¾©»¼¬½º¬¼¾®¾»¨»º©¼½¬¾»¬¾º­À»®½»¬¾¾­¼½©½»«»»¬¿½¯À»¬¾¼«¾¹ª»¹¬À½®¼¿¬¿½®¿¾­¾¾¯À¼©À¿¯ÁÀ¬¿½«¿¾­¾¾¬Á¿±¿À­Á¾®À¾¯¿Á°Á¾¯À¿®ÁÁ¯ÀÀ°Á¼¯¿¾®À¿¯Á¿±Ã½­¿½¬À¿±ÃÀ¯ÂÁ­¿¿²ÁÀ®À¾°Å¾³ÁÁ®À¾­ÁÁ¯ÂÀ³ÃÁ¯ÀÀ®ÁÂ³ÃÃ²Ã¾°Â¿°ÂÄµÃÁ¯ÅÁ°ÃÃ±ÂÂ³ÄÁ¯ÀÅ³ÆÁ°ÅÁ²ÄÁ´ÂÃ³ÈÄµÅÃ´ÅÂ²ÅÂ±ÄÂ³ÂÄ³ÈÃ±ÂÃ³ÂÃ´ÅÂ³ÃÃ±ÄÅ²ÃÃ³ÁÅ³ÆÃ³ÄÂ´ÆÅ´ÆÆ³ÅÁ¶ÄÁ¶ÆÁµÃÄ³ÆÃ¶ÃÄ³ÅÃ´ÇÆ´ÈÄ³ÆÅµÆÅ·ÆÆ·ÆÅ³ÂÃµÇÆ¶ÆÄ³ÈÊ´ÇÆ´ÅÆ±ÇÃ´ÆÅ´ÆÆ°ÄÆ´ÈÉ·ÅÈ·ÆÇ¶ÆÅ³ÈÆµÆÅ´ÅÄµÈÇ·ÇÆ³ÆÇ·ÇÈµÃÄµÈÄ¶ÆÁ³ÅÂ±ÃÆ·ÆÆ´ÅÅ³ÄÇ´ÇÆ¶ÇÅµÅÃ³ÁÂ³ÃÃµÁÅ²Á¿§º³­ª«¦ozf_{boqo~f{`zx_~z`kqolid{iz{b~q]{|not~k`{ixd{wbwxd~fkkwrorlkoqifou|x|~{uuqtk~li{q`xn[rf[o`WofYqnOtiWo`UngUwq[on_xt]tx`xzduzdr_xrYwt_xu]ru[xw]tr]qt_wx]xxYurYtlYtkUnlYnk[tlUor[ooYql[ooYqqYwkYou_ot_qq]uo[toWrt_no[ru`wqiul|§®Á¦É¤±¥wqlgiz|dz|`~x`wx_xu_xw]{xbzzd~|ikrnu{uoqwtuffo_to]wnWro_qq[or[oi[qo]li]nl[onWoiYqi[nt[qo`oq]tuWri[tlWndQlg]qgYik[ngYofQniSofWodYliWrlYllYqoUtq_ur]ux]zufuwbxz]ur[tk`oiSol[rl`uldzo_{r`x~u¼¯®Ã²»Ç·ÂÈ¶ÈÇ´ÃÆ³ÂÇ³ÄÄ·ÈÈ¶ÆÆ¶ÆÌºÈÈµÈÈ·ÈÌ¶ÇÉ·ÉÈºÊÊ·ÉÈ»ÈË¸ÈÊ¼ËÈ¹ÉÊ¸ÌÉºÊÊ·ÌÊºÌÈ»ËÈ»ÊÈ»ÊÊ»ÊÊ·ÊÊ¹ÌÈ»ÊÌ»ÈÉ¹ÌÌ¼ËÈ·ËÆ¹ÊË·ÌÌ·ËÇ»ÈÉ¹ÉÈ¸ÊÈ·ÉÊµÊÊ·ÊÇµÈÆ¹ÊÊ»ÊÇºËÈ¸ÈÈµÆÉ¹ÉÇ·ÊÈºÈÉ»ÈÊ·ÊÉ·ÈÊ¸ÆÆ»ÉÍ¸ÆÈ¶ÉÆµÈÈºÆÇ·ÈÈ¸ÉÆ´ÇÇ¹ÊÇ¹ÈÉ·ÉÇ·ÃÈ·ÉÈ¹ÆÈ¹ÆÅ¹ÇÈ´ÆÈ¹ÇÈ¸ÉÆ¹ÈÇ¹ÈÈ¸ÇÇ³ÆÆµÆÇ³ÆÆ·ÇÃ¶ÆÆ´ÂÇ³ÆÆ¸ÆÃ¶ÇÃ³ÄÇ±ÃÆ´ÆÅ´ÂÄ³ÄÅ³ÆÁ¶ÅÂµÂÂ³ÄÂ³ÆÄ³ÃÃ´ÉÂµÅÄ·ÃÃ³ÅÄ·ÈÂ³ÅÄ³ÃÄ¶ÆÅ¯ÂÆ´ÃÆ´ÂÂ³ÂÂµÃÃ·ÆÃµÂÅ±ÄÂ³ÃÁ´ÁÄ±Ã¿³ÁÀ³ÂÁ³ÂÁ³ÁÁ±ÂÃ²¿Á°ÃÀ®ÁÁµÁÂ±Â½°ÀÁ²¿¿°ÁÁ±¿À²¾Â²Â½²½¿±ÁÁ´ÀÂ±¾¿²Á¾³¾¾³¾À¯ÁÂ®ÁÁ³¿À®¾Á­¿Á±Á¾²Â¾°À¼±ÀÁ´À¿³ÁÃ®¾Á²¿À²ÀÂ³ÀÀ¯¾Á³¾Á²¿À³Á¿®½¾¯¾Á´¿¼°Á¾°¾Á´¾Á²ÀÁµ¾¾²¿À¯Á¿¯¼¾³½¾°ÁÁ°¼¿³¾¿®Á¿±¿Á°À¼³Ã¿°½¼°¼¾®¾½®¾¿¯½»¯»½¯¿½®»½¯Á¾®½¿¬º¾±¼º¯¾½¬¾¾¯¾½®½»¬½»¯»¾³¾»®»¹­¼½¬»º¯¼½¬º·¬Á»®»¼­½º°»¼±¾»­º¼¬º»®¼º¬¼º®º¼®»¹¬ºº¬»·¬¹»¨¸º«··®»»ªº¹ª·¸¬½·§¹¶­»»ª»»¬»ºª¹¼­º·¬º»ªº»­¸§®­³® µ¯ µ¬µ¯ µ° ·­·­¶®·® ³¬¡¶¬¡µ°´®¶°¡´®¢·³ ³²¢µ°£µ°¡¶±·°¸³³®£·±£¸²¢¶²¥º¯¡º²¶°¡¶°¡¸³¡¶¯¤µ³¡¸²¤·³¤¶®¤·³£»¸¢·¯¡º²¤¸±£¹´£¸³¥·²£·³¦º¶¥·µ§·°£¹°¸´¥¹²¦º±·²¡¹´£¼²¡»²¤»´£º²§¸³¤º¶ ¹³£·µ¥»³£»·£¼³§½´¤··¥º´£½·¤º³¦»³¡½·£»³¤»¹¢¾·¤º´¤º´¦¼¶©¹µ¥»µ¤½³¥½¶¦»·©¾¸£¾´ª½¹§¾·¦½µ¤¾µª¼µ¡¾¸©½µ¥»¸¥¾·¤»µª½¸§¾¸§½·§¼¹ª¿º§½¹¦Á¹©¾ºª¿¸©À¹§À¹©¾µ§¾¶¥À»ªÀ»©Á¹¦Á¹ª½¸¨À»¬¾»ª¾·ª¾»¬Á·«Âº§½»ªÀº«Â»ª¾»«À¹¦Á»¬Á¹ªÁ¹ªÀ»«¾»«Á½¬Ã¾¦¿»«Á¹©À½¬¿¼¯Ã½«Ä¾®À½°¾¾­Ã¾«Ä¾®Ä¾¬Á½®Ãº«Ã¼­Á¾°Æ¾¬Ä½«Ä¾¬Æ¾¬Ä¾­Â¾¬Ã»¬Á¿¬Â¿®Â»¬¿»¯À¿®ÃÃ­ÃÁ­Ä»®ÃÁ¬ÃÁ­Á»°Å½¬ÅÀ­ÃÂ°ÅÁ°Å¾°Á¾°Æ¿±ÄÁ­ÆÁ±Å¿°ÆÁ¯Á¾­ÃÀ±ÆÁ¬Å¾²ÅÀ°Æ½¬ÃÀ®ÄÃ³È¿¯ÂÁ¯ÈÁ«ÆÄ­ÆÂ°Æ¾±ÆÃ³ÈÆ³Å¿³ÆÁ¯ÄÁ­ÆÁ¯ÄÀ±ÃÁ®ÅÁ­ÄÀ°È¾¬Ã¿­Æ¾³Ã½«ÅÀ¬Ä¾­ÃÁ®ÄÀ³Ä¾®Ã»¬Ã¿®¾¾¬Á»©ºµ¢¸©±¡££¡qw]qYz`dg{gw[~tS|kUqQwb`ggw[w[oUwkU{iS{l[~kgzgwb`x_{r]~{[q`wddkg~df`{fld{dw[~~`ktt{|qrnokdz_xoY|iUt_Fq]Ok]Mo_OoiQr`UuiQrkStnWwnYxw[x{b~dz`~zb~~_~uWwx]|l[rlQqgQt`WtbUq_YobQq`UnfMtnOrkQqkQrgSqdSqgQniIukQqfSqfMtiUwiStlUznQwnSxqQxo]znQxqYwtdzn{¢´Á¥º¡§nld~d|_~o]~lWzoUqnWzlQxkYrt]|z_~`llqtutqizkg|gzgz`tY~nWznQrgStgQt`QqgOobIo]Il`SobOlbKk_Ol]QkdUnbQqiWobOqfKobMo]Il]Mo_Kn_Ki_Kn`InYIl[Ik_Mn_QogOrkKriUtiQtiWzn_uz[zr[{kUugQrgQrdMtfUriUtiQwfSwq_~~£¡·¬³Ã´ÃÂ³ÁÁ°Ã½°ÁÃ°Ã½¯ÁÃ²ÆÁ³Â¾±ÃÃ°ÄÇ´ÊÆµÅÃ³ÈÂ³ÆÄ³ÇÁ²ÈÆ²ÈÅ²ÈÆ´ÈÁ±ÇÈµÆÆ³ÇÇ¶ÈÆµÊÉ³ÉÄ·ÊÄ´ÈÈµÊÆµÌÇ³ÊÇ±ÈÃ¶ÊÇ±ÇÄ³ÈÆ´ÊÄ·ÈÆ³ÆÇµÊÃ´ÉÆ³ÆÃ²ÆÅ³ÆÄ´ÇÃµÉÃ³ÆÆ³ÆÃ¶ÊÃ³ÈÃ³ÇÁ±ÆÆ¶ÊÃ³ÈÃ´ÇÂ´ÈÆ³ÊÇ³ÈÄ²ÃÃ²ÈÅ·ÇÁµÇÅ²ÆÄ°ÅÃµÉÄ·ÇÃ´ÆÅ³ÆÄ±ÉÃ³ÆÄ´ÇÁ²ÅÂ³ÅÁ®ÆÃ²ÆÄ³ÅÆ²ÆÃµÆÂ±ÇÁ±ÄÁ³ÆÀ¯ÆÀ²ÄÁ²ÄÃ°ÃÀ±Ä¿²Á¾®Ã¾¯Å¾®Æ¾°Ã¿¬Å¿²Ã¿¯Á¾¯Ã¾®Á¾±Ã¾¯Á»®ÄÁ®Â¾°Á¾°ÁÀ®Å»­ÅÁ°ÃÁ¯Ã¾°Á¾­Ã¾¯Ã½°Á¾±¿¾±Á¼°ÀÁ®¾½­ÃÀ°ÃÁ©¿»­Ã¾¯Á»¬Á¼®Á¾¬Á½¯Àº«¿¼¬Â¼©Á½­¾»¬Á¹«Á¼«Á½¯À»§¾»¬Á¸­¾»«Á»ªÀ¸­Áº¬¿º¨¾»§Á»­À¼®¾¸«Á»¬¿¹­À»¬Á¸®¿¸«¿»«Àº«¿½«¾»¬¿¼¬Á»­À¸®À»¬Á½¬Á½«¿·®À»¬¾º­¾¼¬¿º®¾»ª¾¹«Á¾¯¾¸«¾º¬º¼­¾¼¬¾¸­¾¸ª¾»¨Àº¬¾»«Â¸©À¸©º»¬¾·©¾·©½¹¨»·¬¾»§½»ª¾¹ª¾·©»·¬»¸¨¾¸¬º·§½³ª»·ª¼·¨º·«»·©»·©»·¬¾·¥½·©¾·§¾¹©½µ§º²¥»¸©ºº©¸¸©½·¦¼µ§»¶¬½·§¸¶¦··¨¹¸©¹³§º´¨º·¤¹¶©·´¤·±¨º¶¦¹µªºµ§º³¥ºµ§º²©¹´¤¸µ¥¸³¥·µ¥»³¦·´¥»³¥»´¨¸¬£±µ£¶³¤·¶§¶³§·³¦´´§¶´¥³¶§¸³¥·³©µ³¡¸´«¹¶¥µ·¨º³§·µ¦·µª¹¶¬¹¶¥¶·§··§º¶¦º·ª·³¨·¶¨»·¨»¶ª¹µ§º¶¤·´©½·©º·©¸º¬½µ¬¹¶¨º¸¨¹²«¼º¬¹¶¬»³¨¼¸«·»©¼¶¨º·§¹·¨¹º­»·¬º´¨º·¬»µ¬»¹ªº¶¬»º¬»¹«»¶«»·«»¹¬¹¸¬º¸«»·®»ºª»¹«¾»«¼º­¾º¯¼·¬ºº¬»º¨»¸­¹¹¨½¸¬»¸¯½»¨¼¸¬¿»ª»»ª»¶¯¼»«¿»¬¼»¬½·­¾¼¬½¼®½½­¿»¬À½®¾»®¿¼¬¾»®¾»°½¾¬¾½®¼¼­¾¼°¾¾¬½½¯Á¾®À¿°¿»±¾»®Á¿¯¾½°Á¾±½¾°¾½¯Á½²Ã½°¿¼¬À¾®¾¿°Á¾®À¾±Ã¿¬Á¼°Ã¾®Á¾³ÁÁ®ÀÀ¬Ã¾³Á½®¼½³À½²ÁÁ¬¿¼°ÁÀ¯ÄÂ°¿¾¯À¿¯À¿³ÂÅ°ÄÀ°ÃÁ®Á¾³Ã¾³ÃÃ°ÃÂ³ÂÃ³ÃÃ²ÆÂ³ÂÁ³ÆÁ´ÄÃ´ÆÀ°ÁÂ®ÂÂ³ÃÃ¸ÆÂ±ÃÃ±ÆÁ·ÆÄ¶ÅÃ´ÂÃµÂÅ³ÇÂ´ÆÅ´ÆÃ³ÃÃ³ÃÄ³ÅÃ´ÆÃµÇÆ·ÃÄ¸ÅÅ³ÂÂ´ÅÃ·ÈÁ´ÈÃ³ÆÄ´ÆÄµÆÄµÆÄ¶ÆÂµÁÃ·ÉÆµÈÅ¶ÄÄ¯ÅÆµÅÅµÅÅµÃÆµÇÃ·ÉÆ·ÈÅ·ÉÆ·ÆÇ·ÆÅ·ÇÄ²ÄÇ¶ÇÈ·ÆÆ·ÌÅ¶ÈÅ³ÃÇ·ÆÊ·ÈÃ¸ÈÈ·ÊÅ¶ÈÄµÄÄ´ÆÄ·ÆÅ³ÇÄ´ÈÃ²ÃÂ¶ÅÂ¶ÃÄ³ÆÄ³ÆÁ±ÃÀµÁÃ²ÀÀ±¾¾³¼¸¦¶° °©ª¬§{i|dloqlk|`wbudzdnxnriuf{qfxo`qd|wkxnooqzkzk|k~luwuwklrqqkxiouw~~zxwtk{ubwi]{iUobYo`[rd_uf]qqiqufx~g{|d|{ll~kqqo{n~n|fzfzbx{bwx]xw_ru`ur]wt_xu]wqWrq_undwxdwtb|t[tu_to`xq`xzbxr`zx`{xd{wb~xbz{fz|f{~i|g|k|koz©©¢½¥£Ç£§Â¡¢¡xtrn~xg~{b~xbztdwt`zudzud{iouuw~rln~|onq{n~zi|qbulbtn[tn]nkWqiWkbUnd[qi`nkUq_Uo_Si`_nd[no]nk[tgbri]tkWkn[qi]ri[ob_ngUlfSodYnfWkdUon_on_uo_un]qqbwtdzukzwgzu`uufxr`ul]ufbqkbrr]wl_xrg~wx¬¬¬Ä»¼ÈºÁÊ·ÂÁ¯ÁÅ·ÃÈ²ÆÁ´ÂÂ¶ÂÅ·ÅÌ¹ÈÊºÇÊºÈË½ÈÉºÈÌ¹ÇÇ¹ÊÇ»ÈÈ¹ÈÉ¹ÈÈ·ÊÊ»ÍÊ»ÈÊ»ÌÊ»ËÊ¼ÊÊ»ÊÉ»ÉÊ·ÊÉ»ËÌ¼ÊÊ¹ÉÈ¼ÊÌ·ÍÊ»ÌÊ»ÌÉ»ÌÌ»ÊÊºÊÇ¾ÈÉ¸ÈÈ¼ÌÊ¸ÈÉ»ÈÌºÆÈ¹ÊÇ¸ÈÆ¹ÉÆ¹ÇÊ¹ÉÈ»ÉÊ¸ÇÆ»ÌÈ»ÈÈ¹ÈÈ¶ÆÆ»ÇÉ¼ÊÈºÊÈ¸ÆÈ»ÌÉ¾ÊÈ¹ÊÈ¹ÈÊ»ÉÉ»ÊÈ·ÇÇ»ÉÇ¸ÈÈºÆÆºÈÇ¹ÇÈ¼ÈÈ»ÈÈ¶ÈÆºÆÄºÇÆµÅÆ·ÅÃ¹ÇÅ·ÆÄ·ÇÆ¹ÄÄ¶ÈÁ·ÆÃµÆÅ¸ÆÄ·ÃÁ´ÅÃ·ÄÁµÅÄ·ÅÃ·ÃÅ·ÇÃµÇÃ·ÃÆµÅÂµÂÄ·ÆÃ·ÈÁ²ÅÃºÇÀ´ÄÃ·ÁÂ·ÄÅ³ÃÃ¸ÃÁµÆÀ´ÁÆ¶ÂÅ·ÃÂ³ÇÃ·ÃÂ·ÅÂµÆÂ¶Ä¿¶ÇÁµÂÀµÁÂ¶ÂÁ³¿Á³ÅÂ³ÁÁ³Á¿³ÂÁ´¿¾²ÁÂ²ÂÁ³ÄÁ´Á¿³ÁÁ³ÃÁ°ÂÀ´ÂÁµÃ¿³Á¾²ÂÁ²À¾¶ÃÁ³¿À¶Á¿·Ã¾¶Â¿µÃ¾´ÀÁ³ÀÀ²Á¿³Á¾±¾¿¯Á¿¯Á¿³ÃÁ³Á¿´ÂÂ¶Á¿°ÂÁ³Ã¾³ÀÁ³Á¿³Á¿³¾¼³À¿¯¿¼¯¾¾²¾Ã³¿À±¿Á³Á¾°½¾´¿¿¶Á¾¯¾¿±½¾²Ã½³½¼³Á¿³¾À³Â¾°¿½±¾»³¾½°À¸³¿¾°¿¾¯Á¾³¿¹¯Ã¼±º»³¾À°¾¿°Á¾®¼»¯¿¼¯»»±½½±¾¼°¾º°Á»®¼¼­»¼²»»°¿¼°¾»±¼¸°¾»¯À½°¼º®¼¾¯»»¬¹»«½»¯¿»­»º®½º¯½»¯º¹°½¼±¾»¬»»±¾¹°½¸®º¹®»¶«¸¸¨º·¯¸·­¸¶¬½·®»»­»·¬º¹±º©®­³® ³°µ¯µ°´®¡·°¡³°´°¡´¯µ°¶¬£·¯³°·­¢µ³ ¸±·²¡µ± ·®µ±¡¶­µ²¢µ³¢¶²¡¸°µ¯¸³¢·²¢µ°¡´³£¸±¢µ®¶±¡¶³¡¸³£¸±£·²¡·²£¶µ£¶³¢¼³ µ³¤¸²£¹²¦¸´ ¸´¦º²¡·¯¢¹³¤¸´£»³£¼¯¡º²¥¸³¡»³§º³£¸²»¶£»³¥º´¢¸µ¤¹³¤¾´£¼²§»³¨¸´¸´¥»¶»²£»³§¹·¦»¶£¸³§»´¦»´£¿¹¨¼µ¦»·§»¶¦»´§¿·¨»¹¥»¶¤½¶¨¾µ¤»º¦»¸§½¶§»·§¾·¥¾¹©¾º©½³£»·§»·§½·«¾¸ª½¸£½»¨¿¸§½¹ª½¸¨¾¸«¾º¨¾¹©¾ºª¼º©»º©Á»¦¾¸«Áº«¾¼¨Á¹¦»»­Á¹¨¿·¦¿º§Á½ª½º©Á¼¨Á»¬Á»ª¾¹©¾»«Â½¦¿½¬Á¼ªÃ»¬¾»¬Á¸­À¼ª¿½¬Áº¬Ã½©Ä¾ª¾»¬À½«Ã¾¬Ã»«Ã½ªÃ½¬Ã»¬Ã½­Á¾­Ã¿«À½°ÅÀ­ÃÁ¬Ä¾±Ä¾¯Å»¬Ã¾¬Ä¿¬Á¾¬Ã¾³Â¾­ÁÀ®Å½¯ÃÀ¯Æ¿¬Á½±Å¾¬Ä¾¬Æ¾±ÆÀ®ÃÁ°Ã»²ÆÀ­ÃÁ¬Ä½­ÃÂ²ÇÁ­ÃÃ®Å¾²ÃÂ®ÆÀ¬Ä½±ÂÁ°Å¾®Å¾°ÃÁ®Å¿°ÃÁ®Æ¾­ÇÁ¯ÅÀ°ÅÃ³ÅÁ³Å¿¯ÄÁ±ÅÂ­ÅÁ°ÆÀ³ÇÁ®ÈÁ®ÄÂ°ÆÁ¬Â¾¬ÃÀ³Ã¾¬Ã»«Á½¬Å¼¬Á¾®Ã»«Á½«Á»ªÄ¾¥¾»¤¿»§º·£¸­´¨ª®© q~`xld|`k`u]~t]uU~qU|rUt_|`k|dw`uW~qYwkS|fSxq`~fn~gx_|zbwbq[u_xb|dignd|g|d_z`xbo]`inwxxqrnqlix_xkQx`Ou]MqYIq`Kn_OndQqn[tq[tud{q`{{`{tb|x]|{`{{ft`|t_zq[{l_{r[zlYwnUwrYzlStqYwoUtqSuoUuoUtqUroUuoQtlWzoUzuU|qS{tWxtU{wW{u]|zY|z_|x_xY~{Uu]|r[u]{wd{]{`g£° Á¢·¡¦|rgf`xY|wWurY~oU{qUzrWwxW{w`|w`{ilkntqdzgzb{t`~qY|tf|t]n[unSwgUqfIq]QqbOn`Io[Kn_Kl]Mi[Fg_Ig_MkWIiYDlWIn]MnbMldIlbMqdUofQnbOn_KnbMk]Il[Ml]Ik[IlYKl`OnfMnfQr`UqxUxoYukUwnUuk[wiQwn[tgMudQofUtgSrfUxdQunb|| ³«°À´¾Æ²Ã¿«Â¾©¾¼¨¿»©Á¾³ÄÁ°Â¿²ÀÇµÊÄ´ÇÆ²ÄÄ±ÆÃ°ÆÁ²ÆÄ±ÆÅ±ÈÇ´ÈÅ·ÇÄ´ÆÁ¶ÈÇ³ÆÆµÊÆ²ÈÅµÈÆ²ÆÆµÉÈ³ÊÄµËÊ·ÆÄ¶ÅÄµÉÅ³ÇÈµÈÇ·ÈÃ´ÆÄ³ÊÇ·ÍÃ³ÅÆ¶ÇÃ±ÄÆ³ÆÅ³ÊÁ³ÅÃ¯ÆÄµÆÂ´ÈÆ±ÆÅ³ÅÇ¶ÅÄ³ÇÄ±ÆÄ³ÇÃ²ÃÄ³ÇÂ²ÆÃµÅÇ³ÈÅ³ÈÃ°ÇÆ·ÊÄ´ÆÆ³ÇÃ²ÆÂ´ÆÁµÄÂ°ÇÄ°ÆÃ´ÇÂ³ÆÀ³ÈÁ±ÂÂ¯ÆÅ³ÇÁ²ÇÂ®Ã¿®Æ¾°ÄÃ¯ÃÁ®ÂÁ°ÈÃ²Æ¾®ÆÁ®Æ¿°ÂÁ­ÃÀ°Æ¾¬Á¾±Ä¾°Á¼¯Ã¿®Æ½¬ÃÀ®Ã¾´Â½«Á»¯ÄÁ¬Â½«ÄÀ®ÁÀ®ÄÁ®Æ¾®ÁÁ¬Á¿®À¼²ÃÀ®Ä»®Ã¿±ÄÁ­Å¿µÃ¾¯Á¾¬Ã¾¬Â¾±¿¼®À½­¾¸¬Â¼¬Â¾­À¾¬¿¾«¾º©¾¼¬Á¹­¿¾®Á¾¬¾»®¿º¬¿»ª¾¼¬Á»«Àº«¾¸­¿»«¾»©À¹®¼¸¬Àº¬½»«¾»¨¿º®Á»­»º«À»©¿¼«»º®¿»¬¾¸¯¾¾«Á¼¬Á»®¾¼¬À»¬Â¾®»ºª¾¼­¾»¬¿º«½¹¨»»¬¾½¬Á¹¬»º¬½º¬¾»¯¾¹©¿½¬½¹¬¾»¬Á»¬½¼¬½¸¬½»ª¾¹©½¼©¾¹§¸º¬½·©»¸¬¾¸«»¸©¾»ª¾»ª½·©ººª¼º§»·¨»¹§º·«»·©»¸ª»·§»¸­»µªº·¨»·©½·§»¶©»¶¨»·§¼¸ª¸·§»µª»·©»º«»·©»´¥º·¨ºµ¨»µ¦º´¦¹´¤ºµ©»·©¸´§»µ§·µ§»³§··§»³¥¸³¦·³¥¹³£·±¨¸³¥¸·¨¸³§·´¥¹·¦º¬¥±³¥¶³¥·³¤µ³©¶´§·³«¸´¦¹¶¨·¶¤·µ§µµªµ³ªº³§¶µ¦·¶§¹³¦¶³¦··¥¶µ¦¸µ¦·´ª¼¶¦¹²¨·µ¨¸³ª¸µªº·§·¶§º¸ª»·ª·³ª¸¶¥··©·¹¦»¶©½·©¹¶¦»¹¬ºµª¹´¨»µ¨»·¨º¸«·µ¨»·¨»·©»¹«¾º§¼¸©»¹©º¶©¹·¨»·®º»¬¹·¨¼µ«¼¼©·º«½·¬¹¶¬½¹©»µ¨¼º®¿º¨·»ª¼»¬¾¶¨¼¹­¾¹©¿¹©½¶¬¾¸¬»·ª¼¹¬½¹©¼º­Á»±»º¬¼·©¼¹«¼¹¬½¼¬»»®¾º¬¾º¬¼¹¬¾º®»¼¬¾½¯¾¼°Á¼°À¾°¼¿³¿¿¯¾½±¿»­À¼±Á¾®¿¼¬À¿¯Ã¿¯Á¾°Àº±Â¼­À¾°Á¾°¿¼±À¿³¾¼±À¼®Á½²¿½²À¿¬Ä¿¯À½±¿À°Ã¿³ÁÂ³Â¾³ÁÀ®Â¾±Á¾¯Ã¿°À¾³ÁÁ³Â¾°ÃÀ³ÀÁ°ÂÀ±ÃÁ²Å¿®Á¾¯¿Ã³ÂÁ´ÂÂ°ÁÁ³ÅÀ²ÁÁ°ÄÀ¯ÁÀ°ÂÃ´ÃÃ´ÁÃ±ÄÁ³ÃÁµÆÃ³ÅÁ³ÃÄ²ÆÃ´ÄÂ³ÆÃµÇ¾±ÀÅ³ÅÁ¶ÆÃ³ÄÁ¶ÂÅ³ÅÃ´ÇÃ³ÃÃ¶ÆÈ·ÂÄ³ÈÂµÃÄ²ÄÃ·ÈÆµÈÇ³ÆÁ´ÂÄµÄÁ·Æ¿¶ÇÃ·ÈÃ³ÆÈ¶ÇÃµÃÃµÆÃ·ÆÅ³ÈÃ¶ÈÇ¶ÅÆ·ÆÆ·ÈÆµÈÃ³ÇÁ¶ÅÈºÆÄ´ÇÄµÉÈ·ÇÈ·ÇÆ´ÇÆ·ÈÅµÇÃµÇÆ³ÇÈ·ÆÂµÄÄ³ÇÂ³ÃÀ³ÄÁµÃÂ¯ÂÂ³ÄÅ±ÆÅ³ÅÅµÄÁ°ÄÂ¶ÁÁ°Â¾²Â»¬»·¢¸±®µ«¨¡olttorndzixbwbuiiqo|kk~dr`xo_w{k~uwtn{k|wk~k{kkolwqqorqqlnrrz{w{x{|wn~r_{fYtbUoiYuiUrg`wt_wx_zf~xfwzi~g|q|ll~okl|i~f~{b|u`wr[{r_xr`tqbuxd{{]wz`{zbz|fxfz~fd{gif|fgiinnklkkiggoonu¦¯¯¶±µ °~ztnkgxdw`|xf~|f|i~|lonutxxzknlzkxd~{f|udzrb{t_wn`rk]qkYqiSonWrg[qfSlb]lfYqdSkbYodSlfSlbUkdWndYki[ngYogWngYnf]nkUof[k_UnfSndYodUobWogYilYql[ok[qoirzg{tdtwg|xf{ud{w`zqdxr]wg]tr_uu`xu_zob|{ª§¬º¯·Á³¾¿¯¾Å²ÃÁ³ÄÁ­Ã¿³ÂÂ´ÃÃ³ÃÁ¶ÆÆ·ÆÄ¸ÆÊºÊÈ·ÇÄ¸ÆÈ¹ÊÊ¹ÈÆºÊÊ¼ÉÊµÆÊ»ÈÉºÌÉºÊÊ»ÊÊ»ÊËºÈÊ¼ÈÉ¾ÎË»ÌË»ÈÈºÈÌ»ËÉºËÊ»ÊÈ¼ÊÊ¹ÉË¹ÊÈ»ËÆ¹ÊË»ÊÇ»ÇÊºÊÊ»ÆÇ»ÉÇ¸ÈÈ·ÊÈ·ÈÆ¹ÊÈ»ÇÇ¼ÆÈ·ÈÈ½ÇÈ·ÊÆºÈÉ¹ÈÈºÈÈ»ÆÆ·ÊÉ·ÇÄ»ÉÊ¹ÉÊ·ÆÆ·ÈÈ·ÌÉ¸ÉÆ·ÈÆ¹ÆÉ¸ÈÈºÈÃ¶ÆÆ¹ÊÊ¹ÇÈ¸ÈÈ·ÊÄ¶ÆÄ³ÇÉ·ÆÃºÆÃµÅÆµÃÅ´ÇÅºÄÆ³ÅÁ¶ÄÅ·ÄÂ³ÃÃ»ÆÅ³ÆÄ´ÈÂµÆÁ¶ÄÂ·ÃÃµÅÃ·ÈÄ´ÆÆ³ÆÅ´ÇÄ·ÂÁµÃÃ³ÂÆµÅ¿³ÃÃ³ÆÁ¶ÆÄ³ÃÂ³ÂÁ³ÂÅµÅÄ¸ÄÀ´ÃÂµÃÂµÆÃ³Ä¿¯ÅÁ´ÃÀ³ÁÂ³ÄÂ´ÃÃ³ÃÁ´ÅÄ´¿¿³ÂÂ³ÁÃ±ÁÀ³Â¿³ÁÃ°Á¿³ÅÁ¶Á¼±ÃÀ³ÀÁ°ÂÀ®Á¿´Â¿±ÃÁ°Â¾³Á¿³ÀÁ³ÀÀ³Á¾³ÂÀ³¿¾°ÁÁ´Á¾³¾¿³¾½³ÁÁµÃÁµ¾Á³ÃÁ±¿À³ÃÁ³Â¾±Â¿³ÁÀ²Â½°À¾°¿¿²ÁÀµÁÀ±ÃÀ³Á¾³ÀÀ´Ã¾´À¼³À½´ÁÁ³ÁÁ³½»¯Á½²½¼±ÁÁ¯À¼±¿¿¯¿Á¯½¿°½¿³¿»®Á¼³¿¾°À¼®¾¾³¾¾µ¿»«À»°¿»­»¾¬½»±¾»°¼½¯¾»°¾·°½½³»»°»»­»½®¾¹±¾»¯·»³»»°¼º°»»­½»¯»·­½»±»»®¼»¯»»°½¹¬»¸­¼¼±»¹­º¶«¹·ª¹·¯¼º®»·©»µ­º¹¬º»¬¹·®½·«º·¯¹·°º·¬¹·¬º¹®¼¸¯º»­·£¡¬¯³­°®´¯ ³¯´² ²±¡·²¶­¡µ°µ±µ¯³³¢³±³²¡³­¡·±´°¡³¯ ·°µ± ´±¡¶­¡´²¡µ¯£µ² ·²¶±¡¶° µ¯ ·² ·³¡¹²£·²£¸°¢º²£¸°¥¸³¥·±£¹³µ³ ·°¡¸±¢µ´¤¶´¢¹²£·µ¥»²¹³¤·²£¹³£»³ »µ·²¢º´£µµ¥·µ¦»´¥º´£ºµ£»³¡·³º´§»³¡º³£»¶£º³¥»³¤»¶§»µ¦ºµ »·¥º´£»´§¹³¥¼µ¤¹µ¤½·¥¾·¦¹·§½µ¥»µ¦Àº£¼¹¥½³¤»·§¼¸¦¼¶£¼¶¦¼·¤¾¹©½¸£»¸§»·¦½·§¿»¨¾·ª»º§¿·¦Á·¨½¹ªÀ»¤¾¹¬½µ©¾º©½¸¦¾¼«Á¸ª¾¹§À¹¨¾¼£¿ºª¾º«¾¸«¿»¨¾»¬¾º¦¿ºª¿½ªÁ»«Á½¨¾»ªÁº«¾¹«À»«¿»©¾»ªÃ½ª¿¹¨Á»¬Á¼ª¾½©Àº©¿½¬Á»«Ã¼«¿½§Á»¬Á½­Ã¾«Ã½­¾»¬ÁÀ­ÃÁ­Â¿©Ã¾¬À¼°Ã½©Á¼°Ã½¬Á¾®Ã½®Ä¾°Ä¼®Â½¯Á¿¬Ã¾±ÃÀ«ÆÀ®Ã½°Ä½³Ã¿¯ÃÀ¯ÄÀ®ÄÁ°ÄÁ²Ä¾­Æ¿¯ÃÁ­Ã¿­ÃÁ¬Æ¾®ÃÁ¬Å¾®ÁÀ¯Ã¾®ÃÀ­ÅÀ®Ä¾²Ã¿¯Æ¾®Ä¾°ÇÁ°ÃÃ°Â½³Å¾¬ÆÂ±ÂÃ°Å¾°ÄÂ®ÃÁ¬ÅÁ®ÇÂ®ÄÁ±ÅÀ­ÆÀ±ÂÃ®ÃÁ°Å¼ªÃº©Ã½¦ÃÀ¬ÃÀ°Ä¿±Á¾®Ã¿¬Ã¾¯Á¿®¿À«À»¬»·¡»¯¯©©¢n`gni~_x`z_u]{WuSrU{xddgkw]tWzoSudUtuQxud|zkxft_zq[{gYzt]zqb~~_~`i`|gf|bu`loig|likqrwr|klqriz_|iWx_Ot]KldMtdOngOqgWtq[|uY{zbw``~dw`rd~~_zd|xfzq`~n_xqUunWunSqnWtlMwlWuqQwoUutYww_ww]{xY{z[~{g|`bkgggigkgininnnfkggoz´³¡®«¬¬zqod_w`_{Y~w]|]Y`|{d|wfzzdd{bwi~lldxd|z`o[zlYxnWwiQulQwiQtdQn_OobKnbMo[KnbIl`In]Il_Mi_In]Mn_Kl_Dk[DlWMk[IdYKg[Qg_Fi[DgUKg`Fl`Qk_Il_Ik]IkSFi_Il`FidKnfUtkQon[rq[xqYuwYuoYxl]wkUwfUzgUtgStf_uoUtdSui_zu §¬º§·½«»¿¬Á¾®½¼«Á¾¬Ã»ªÁÀ«ÀÂ°ÃÅ³ÈÃ³ÆÅ²ÈÆ³ÊÅ²ÇÂ²ÇÃ³ÇÊ¶ÆÂµÊÆµÊÇµÇÆ·ËÊ´ÊÃ³ÇÅ³ÇÆ´ÆÃµÈÄ¶ÈÂ·ÊÈ³ËÆµÆÃ¸ÉÆ¶ÉÆ³ÈÄ¸ÊÆµÆÃ³ÇÄ´ÊÅ²ÆÇ´ÆÃ´ÆÁ³ÆÄ²ÄÂµÈÄ±ÅÄ´ÇÁ³ÇÃ°ÃÂ°ÅÄ²ÅÅ´ÅÅ®ÅÅ´ÆÆ²ÆÁ³ÆÃ°ÈÃ³ÆÁ²ÉÃµÄÂµÈÆµÅÃ²ÇÃ´ÆÃ³ÇÃ³ÆÃ²ÆÁ³ÆÃ³ÆÆ¯ÄÁ°ÆÆ®ÆÃµÃÄ³ÆÅ®ÈÁ²ÅÃ°Æ¾¯Ä¿±ÁÁ¯Ã¿®ÅÀ°ÃÁ²ÁÀ°ÀÁ²ÃÃ³ÄÁ±ÄÀ°Ä¿®Æ¾±ÃÀ®ÄÀ«Ã¾°Á¿®Ã¿®ÃÁ³Å¾®Ä»®Â¾°ÁÁ®Ã¾°Ã¿²Ã¿²Á¾¯À»²Ã¾®ÀÁ²Á¾­Ã¾°ÁÁ¯Ã¾­Â½®Á»¯Â½¬Á¾¯ÁÀ©¿»®À»ªÁ½¬¾¾®Â»­¾¹¬À¾­Àº¬¿»«¿»¬Á½¬¾»©Á¾«Á»¬¿»«Ã»«Á»«À½«¾»°Ã·­¿¹¬¾»§¾¾¬Â»ªÁ¹­½»©»¼­Ã¼¬¾¼©Â»¬Á»ªÁ·¬¾º¬¾»©¾»¬¿»¬¾»­Âº®¿¼¬¾½¬Á»®À»­¾»ª½¸«¼¾©Á·¬½¼«¾º«¾¸¬¾»¬¾º¬»»¯¾º«½»¬»»­¾¶§½¸¬¼·©»¸¬¼»¬½¹©»¹ª¾»¬¾¸ª¿·©½»«¼¸¬»¸«¼¸©¾·«½»§»¸§¼·«»¶ª¾¹©»¶«»¹¨»ºª»·«»µ§º³¨¹µ¦¼·ª»·¥¸µ©»³¦¸·¨º³§»µ«¸·¨¸µ¨¸·§¼¶¦º¶¨º·¥»·§º·¨¸µ¥¹·¦¼³¥·°¥¸µ§·´¦¹µ¤¸³¡¹²¥¼´¦·¶¦µ³¥µ³¤·µ©¶°§·µ¦¹µ£··¦·©¤®µ§²±¤´³¨´³¥µ¯ª¶µ¦·¶§·³§¸¶ª¶²¦·³¥¹¶¥µ³§¶´¥¹´¥³±¦¶³§·¶¬·µ£µ´¦·µ§·¶¦¸³¦·µ§µ¶¦¸·«¸³¥µµ¤´·¨¶¶¦·¶¬µ³©º·¨·¶¨¹¶¬¹³§¹·«¸¸©»´¦¸¸©·´«»·¬¸»©º·©¹·¨¹·©·¹¬»¶§¼·¨»·¬»¶ªº¹§¸·¬»¹«¹¹¬»¸©¹º¨º¸¬»µªº¹«»·ª¼·¨»·©¸¹©º¹¬¼»ª»º¬»¶¬¹½¨»»«¾¼¨»»¬¾»¬º¸¬½ºª½·ª¼º©½½­¾·¬¾½­½»­»»¯¿»¬½»­»»¬½¼¬¾»¬½½¬½»­¿¼¯¿»°»»­¿»­¼¾­¿º®¾¿¬¿º®»¾¯¾¼¯¾»®¿¾±¿½¯Á¼¯Á½­¾¿±¿¾¯¿¾®Ä½°À»°Á¿²¾¿¬½¾²Â½²ÃÀ±Á¿®ÀÁ°½½¯¿Á²Á¼¬Á¼¯Â¿¯ÁÁ³À»¯Á¾®ÁÂ¯Á¿²ÁÁ±ÅÀ°ÁÀ®ÀÁ²ÁÀ³Á»±Ã¿±ÀÃ²ÃÃ³ÆÁ³ÃÂµÁÂ°ÅÂ°ÁÃ´ÃÁ³ÃÁ³ÃÃ³ÃÁ³ÅÀ²ÃÃ´ÃÃµÅÃ³ÁÃ¶ÁÃ²ÃÃ³ÁÁ±ÅÃ³ÁÆµÃ¿´ÁÀ³ÆÃ³ÅÃ³ÇÁµÃÃ·ÆÃ²ÅÆµÄÆµÈÅ·ÄÃ¶ÅÅ´ÅÃ¶ÆÆ´ÄÃ³ÅÀ¶ÆÆ·ÅÃ·ÇÇ´ÆÂ¶ÈÂ³ÅÃ³ÈÃ³ÅÃ´ÉÃ¹ÆÃ³ÄÃ²ÅÁ¶ÈÄ¶ÆÆ³ÃÄ³ÅÇ³ÆÂµÅÅ²ÃÃ´ÃÆ¶ÅÃµÆÃ´ÆÆ·ÄÆ´ÆÆµÄÄ³ÄÇ³ÈÆ³ÅÃ±Â¾®ÂÂ°ÆÄ³ÅÆ³ÆÆ³ÅÆ¹ÂÄ·ÄÂ´ÃÃ°Á½­ÁÀ±»¶§³²©¬¥r|ioqtligzbzb{bxg~gtwqnirbuq]zf_xub{~kun~{kzb{n`xk`xwd~qou{nonqtxzrorruuzzwxz~rl|nbubYqbWnd[qn`rtdwu[wxd{~lqnuq~ooiznzk|zfxr`ldtt_zq`wu[uudxr]xtbwt[wzgu{g|iiigtoxzz~{|¥z§¢|¢¤~©§¯®«¦{{|¦¢³¢½¥»¤µ¤±¢²¨|xqkqnn~~no|kxl{ik~f|gi~xirlrnkud~rbxo[un]rq]rl`qr_ug[wkWoiWri[ng[liWll[nl[kiUoi[lfSidQl_Wl_SkfWibUob[ndSkdQo_YkgUid]idWnlWnfUkbSnd[nkYnkSrk`qr`qq`wxkx|guf~xd{odwq_zobtt`wk]rk_wrdru]trdz~o¨¤§À©¹À­·Ä·ÄÆ¸ÆÅ´ÄÄ´ÃÈ¸ÆÊ¸ÈÈ·ÈÊ¹ÇÈ»ÈÊºÉÇºËÍºÈÊ·ÈÊ·ÈÊ¶ÊÊ»ÊÈ¼ËÊºÌÊ½ÈÊ¼ÍË»ÊÌ¹ÊÉºÈÇ»ÈÊ¼ËÈ¹ÈË¹ÌÊ¾ÉÍ½ÌÌ»ÊÈ·ÉË»ËÈ¼ÊÊ½ÈÈ·ÊÈ¹ËÊ»ÅÈ¹ÊÈ¹ÈÈ·ÈÊºËÆ¹ÈÈºÈÈ¹ÆÉ¹ÉÆ·ÈÆ·ÅÄ¸ÈÆ¹ÊÉ¼ÈÈ¸ÆÆ»ÈÊ·ÉÇ»ÉÆºÈÆ¹ÈÆ»ÈÈºÇÆ¾ÈÆºÆÈ·ÈÃ¸ÆÈ·ÆÆ·ÆÄºÈÈ¹ÆÃ»ÇÇ·ÇÆ¹ÉÅ»ÈÈ·ÅÆ¶ÄÇ¶ÆÆ·ÇÄ¶ÂÄºÆÅ´ÄÂ¸ÃÄ·ÈÃ´ÃÂ·ÆÆµÈÁµÃÄµÄÈ¶ÅÃ¶ÃÃ¶ÃÀ³ÂÃµÁÇ´ÈÂ·ÄÃ¸ÃÆ´ÇÂ³ÄÂ¶ÂÃ³ÇÄ·ÃÄ¸ÄÃ¶ÆÁ²ÃÁ³ÅÃ³ÄÆ³ÄÃ·ÄÃ·ÆÃµÃÀµÃ¿³ÂÅµÃÂ´ÃÀ±ÁÂ³ÃÁµÁÁ²Á½´¾¿µÁÁ²ÃÀµ¿½°ÀÁ²ÀÁ°¿Á³ÂÁ´ÀÁ°ÁÀ¯Á¾µÅÂ³À¿³ÁÂµÁÁ²¿Á°¿¾³¿Á´ÂÂµÁ¿¯À¿¯Á¿´À¿µÀ¾²Á¿²¾¼±Á¾²ÁÀ³¾¾¶½¿µ¿Á²Á¿µ¿½´Á¾¯ÁÁ³Á¾°ÁÂµ¾¾±À¾°Á¿³¾¼³À¿²¿½³¿¾²½¾²¿Á²À¾°¾¼´¾À²À¾¯¾¿³¿¼¯¾»­»¾³¾¼°¿¾³¿½°¾½±¾¾°¿¾µ¾º³¼¾³¿½°¿»°½»²¼¿¬¾½°»½²¼¼­¿¼®¿À°»¼¯¼¼¬¼¼¯¾¾°»»­¿»¯º·¯¾¾²¾»®¼»­¸¼±»·°½»¯¼¼²º¸®ºº³¾»­»»ª»·¬¸»®½¸®¹·±¹¹¬»·¬¹·«¸¸¬¸·ª¹·¯·»¬··¨ºº®»·¬º·­¹º®·¸¬·º­º·«¹ºªº»¬»·¬»»­¶©®«²°³¯·®µ²·­µ²¡³® ¸± ¶¬µ®³®³®±®´¯µ³£·± ¶°³¯´­¢µ°·°¶°·±¡µ¯´±¡¸­·±¡·®£º²¡¶²¸¯³³£¶³¢¸²¢·±£¹±¸±¢·°£º²³²¢º±¡¹±¢¸³·±¢·³¢·´£¸°¤·³¢·´¡¹µ£º³§º²¢·³¢·µ¡¶³¹´§¾³¤µ³¢¹± ¼³£¸±£¹´¢»³¥»² »³£¹´¥¼²§»·¥·³£ºµ£¸µ£»µ¢¸¶£¹²¢¹µ¤¸¶£»µ¥»·£½º¤½µ¢»·¦ºµ§¼¶¤»µ¥¾³¥º¶¦»¸§»·¦¼¶¦¾¸£¼µ§¾¸¥½·¥»´¨¾¸£º·©¾·¥»·¨¾º©¼¸¦¾¸«¾¹¥¾¸¬¾¶£¾º¨¾¸©¾º¬¾µ¦½º§À·©¾»©¾ºª¾º©¿¸©¾¸¥¾·©¿¹¦Á½§À¸§Âº¥»¹©Àº«Àº¨¿¹­Áº©½¸ª¿½¬¾º®¾»ªÀ»§Á¾¬¿º¬À¼¬¿¾ªÁ¹«Ã»©Ã¼¬À¼¬Â¿ªÂ¾¬¾½«Á¾ªÂ»«À½ªÃ½¬Ã¾­Á¿®Æ¾­Á¾­Á¾¬Â¿°Á¾­Ã¾®ÅÁ¯Ã¿®Ã¿¯Á¾°Ã¿¬Á¾±Á¾­Ä»«¿Á²Ä¾¯ÃÁ¬Ã¿°ÅÀ¯ÅÀ¬Ã¿«ÆÁ®ÃÁ°ÄÃ±Ã¾®Ä¾¬Ã½®Æ¾®Ã¾¬ÁÀ®Ä¾²ÅÀ®ÃÁ®Á½¬ÃÂ¯ÄÁ²Å½­Ã¿«À¾­Ã¿¬ÅÀ«Á¿­ÄÀ°ÆÁ®ÄÁ°ÅÃ²ÁÁ²ÆÂ°ÁÀ­ÅÀ°Ä¾¬Ã¾©À»±Á¾¬Å¾¬Ã¼¬ÁÀªÃ¾±Á¾«Áº«½½©»¸©µ³­¦¥{fw]qU|gglg[{]tWrU{nU|q]dtl__{uY|fQtdIugQwwU{w[zt[{w]{nUzdSwiY{~]iqnq~`|ibfkin`fdkkbwi`knqlx_`W{`Kn]DnYIofMqgSuqYzt`iigkf`u]u`{{]qW{nYztW|iStgStdKugMtlQukOrlQxkSwnW{t]|w[z]`dilqtrx£w¡z|©w¯ ³¡¹¤·ª¼¨Ãª¸£»£»¡²|¡°¡¬¥¥§ ¶§È«¿¨¹©µ¡·¤µzold``~Yt_~tU|tW|qWzq_zw[{x_{|`]Y{]~zdgb`Y|qSwoQwkOzgStfOo`MqiQnbUtbMolIlgMqfOlgMq]Kk]Di]Bn[MlYFfYFl]Dk_Ik[MkdQnYIi`KgYDkWFn[DiYKl[Fi_Mk]Dk[On[MkbKo`OngQniQqlWwnWtq]xlUuq_zuYxgQwnStlUwdUtdYrrOulQzndq²¢­º©¹Á´¾Ã°ÅÀ®Ã¿°ÃÇ¯ÅÂ²ÄÆµÉÂ³ÇÄµÆÆ³ÈÇ¶ÊÃ³ÅÅ°ÆÁ³ÇÄµÇÅ¶ÈÈµÉÄ·ÉÄ·ÇÇ·ÉÆµÈÈµÈÆµÊÄ²ÈÇ´ÆÆ³ÇÆ³ÊÉµÈÇ´ÊÄ³ÇÅ¸ÊÆ³ÆÄ³ÇÃ³ÊÇ³ÇÃ³ÆÃ²ÇÅ®ÅÁ³ÉÄ²ÈÄ²ÄÂ²ÆÆ³ÈÄ³ÃÁ³ÆÁ³ÈÅ°ÇÃ±ÈÁ±ÆÅ³ÇÃ´ÆÂ²ÅÅ´ÆÁ±ÇÃ²ÇÃµÇÆ³ÊÄ²ÇÆ´ÅÁ²ÆÅ±ÆÃ³ÆÃ±ÅÅ³ÈÃ±ÃÃ°ÇÃ´ÃÃ±ÇÃ³ÄÂ³ÆÁ¶ÇÁ°Ä¾®ÆÀ¬ÁÃ²ÄÃ±ÅÁ­ÅÃ¯ÃÁ±Ã¿±ÄÁ¯ÆÁ®ÂÃ°Ã»¬ÁÁ±ÃÀ¬ÃÁ°ÆÁ°ÃÀ¯ÆÁ­Ã¿®ÁÀ®Ã¿¯ÃÁ±ÃÁ®Â½¬ÂÁ°À¾±ÄÀ®ÄÁ®Á¿¯¾¼¬ÃÁ¬Ä¾°Á¿®Ã»­Á¾¯Á¿¬Á½¬À¼¬¿½«Á¾®Ã»ª¾½¬¿½®À½®Á·¬¿º©Á¼­Á¼­À»­Ã»®À¾¬À½¬À»¨¾»¬Á»­Á»¬¾·¬¾»¬¾»©»»¬¾»«Á¼¬À»­Á½®¿º¬Á¸ª»»­½»©¿¿­Á¼¬¾¾¨À½«»»«¾¹«¾»­Àº®¾¸¬¿¹ª¾»®¿¼¬¾º©¿·¬¾»®Á½¦¾¹­¾½®À¾«¿º°¿»ª¾¼¬¾º«¾½©½¸§¾ºªº½¨¾¹ª¾»©¾»ª¾¸©¼¸¨»·©¾·©»»«»º«¼·©»ºª¼¹«»·§¾µª»¸ª¸¶©½¹§½¶ª¼·«»¸ª¾·£º¸«½·ª¹´©½¹¨»³«»¸¥º¸¨¹³¨»·¦»·§·¸§º¶ª¹·¤»´§¶·¤¸·©»·¦·³§»µ¤·µ§º¶ª»´¦·´¦»³¢·°¥µµ£º´¥¸²§ºµ¢º³¢·´¥¹³¤·³§·µ©¹³£·³¥¸³£¸³¥¸µ£¸® ¬³¢³µ§³´¦´²¦¶·¥··¨¶µ¨¶³¨¹·§¶µ¨µ´£·³£·³§¶¶¥¶¶¤·µ©¶¶¨·´§·³¨·µ§·¸¥»·¨·³¦¹¶§·¸¥´·¦·´¨·µ§··¨¸·¦¹·§»´ªº¶¨º¶¬¹·§·µªº·¤·¹«¹·¨»¹§¸·ª»µ¦¹¶¦¹¹§··¨»º«º¶ª·¶¨»¹©¼¹¬»¶ªº¶¨¹¸«·»«¼·¬»·§¹¹ª»·¨¹º§»¸¨º»«¹¹§½º¨»¸©»»¨¼»©¿¼®»¹¬¹»¬»º¬À¹¨½·¬ºº®¼»§¼»§»»¬½»­½»¬À·¬¾»­½ºª¼½¬¾ºª¾»ª¼¼±¾¼®½½ª¼»®»¼­¿º¬½»­¼»«À¼ªÁ½¬À½¬¼½­¾¼¯Àº³½¾¬Á¾¯¿¿­À½°À½¯¿½±À¾¬¿À³¿¼®¼¾­Á½¬¾¼®Ä»­¼½­ÁÁ®Ã¿±ÁÁ¬Á¾¬ÁÀ¯À»²À¿­À½³À¿®À½°ÂÀ±ÀÁ®ÁÀ°ÁÀ°Ä¾²À¾°ÀÁ³ÀÃ±Ä¾®ÃÀ­ÃÀ±ÅÁ²ÃÃ±ÅÀ´ÃÃ±ÃÁ³ÅÀ³ÃÁ±ÂÃ´ÁÅ³ÅÂ®ÈÂ´ÁÀ°ÂÂ°ÃÁ³ÁÁ°ÂÁ³ÆÃ¶ÂÂ±ÂÂ²ÃÅ´ÇÄ¶ÆÂµÆÅ³ÅÆµÃÆ²ÅÁ´ÄÃ³ÄÈ³ÆÆµÅÂ´ÃÅ²ÅÁ³ÃÃµÄÅµÆÁ³ÄÅµÆÅ¶ÅÄ³ÁÆ¶ÆÃ·ÈÅ´ÃÁ²ÅÃ°ÆÅ±ÆÆ³ÆÄ¶ÄÅ²ÇÆ´ÃÄ³ÆÃ²ÇÁ³ÆÃ³ÆÄ³ÅÁ³ÃÂ³ÅÅµÃÄµÄÆµÅÄ³ÈÅ´ÉÈ¶ÅÂ¶ÆÃ´ÃÄ±ÆÆ¯ÄÃ´ÂÅ²ÆÆ³ÅÃ³ÁÂ²Ã»°ÃÁ°ÁÀ±ÁÂ¯¿¾°»¼ª¶¸¨®®§o|bz`|lounligz`wf{`nxxzoiw`zgYzq]{~b|k~i~{i|xfzw_zl_||fru{{unnlrz{zoqluoonouzwqfgui[wfYqfQuiWrn_uxf{ilqrrrnwkzxkikxb{wg|w`{t`zr_xq_xt_uzb|w]{z]zxb{d~llou{|¥{¥{ª±º¡·¤·§¾«Â©È¨Ð ³Õ¤³Ó¢µÕ¤³Î¢µÐ´Â¬ÄªÃ­Ä©Ã®Ã¬ÀªÁ®Ã¨®È«²É¨°Ã­¿«¹§³¦®¬ztnk~dx[udzz_zw`xtdzxg{zio|lnlttq{gzxfxz]|z`u{`{u]rq[uu[ru`tn[ro_ql]ui[riUrfYnfUogQnb[nfQibWqiYkgUoiUof[lbUdiUkgSkbSlbUibSk`UkiSoiWng[ul[rq[rk]no]tubuo`zr`wxfzwfxwb{ugwwgwr`xrbul_un_wq[xqbzqi~{ª¢¨·©·Âº¾È³ÃÊ¸ÃÃµÅÇ¶ÈÇµÆÉ·ÈÇ¹ÈÊ¸ÉË»ÌÌ¾ÈÈ¹ÊÌ»ÍÉ¹ÊÉ¸ÉÉ¼ÊÍ½ÊÊ·ÌÊ»ÈÍ¸ÊÊºÆÆ»ÊÈ»ÉÉ»ÊÎ·ÇË»ÊÌ»ËË»ÉÊ¾ÊÊ¾ÌÊ¹ÊÉ¹ÊÈ¹ÈÊ¹ÊÌºÇÉ¹ÈÈ¹ÉÊ´ÉÊ¶ÆÉ·ÈÇ·ÄË¸ÊÈ¶ÆÆ·ÈÈºÆÆ¹ÈÊ¶ÈÇ·ÈÈ¹ÉÊ·ÊÌ¸ÉÆ¶ÆÈ»ÆÈºÈÉ·ÈÆ·ÈÉ¼ÉÈ·ÈÈ·ÈÈµÃÆ¹ÈÉ¶ÇÅºÈÇ·ÈÇ¹ÆÈ¸ÇÈ·ÆÄ¶ÆÇ»ÈÊ¸ÆÇºÉÈ·ÆÇ¶ÈÃ¸ÇÅ´ÆÄ¶ÆÆ¶ÆÃºÅÃºÇÆ´ÇÆ·ÈÅµÅÁ¶ÅÁ°ÅÄ¶ÃÃ³ÆÂ´ÃÁ·ÆÂ³ÅÄ´ÃÆ¶ÅÃ¶ÅÃµÄÄµÄÆµÃÃ¶ÁÃ³ÄÃ¹ÅÁ²ÃÂ³ÁÆ´ÅÃ¸ÄÃ·ÅÀ¶ÄÂ·ÅÃ³ÃÃ²ÅÀ³ÂÆµÂÃ´Æ¿³ÅÂ³ÀÁ³ÁÀ³¿Á¶ÂÁ³Ã¿³ÃÂ³À¿³Â¿°Ã¿¯ÁÂµ¿¿³ÂÂ³¾¿¯¾¾³Á¾¯À½³ÀÁ³¿Á³¿¾¯Á¿´ÁÀ´À¾°¿Ã¯ÁÃ²À¾±¾¾¯ÃÁ±¿À³ÀÀ³À¿°¾¿±Á¿³ÁÀ°Á¿±ÁÁ¶¿Á²¾Â³ÁÂ°ÁÁ³Á¾²ÂÀ³Á¾³¿¿´¿¿³ÁÁ³¿À³¾À¬¾¾²¾Â±Á¾±½Á¯Á½±¾¾´Á¾±½¼²¾¾²¿»±¾¿±¿¾¯¾»°»¼±¿½³½¾¬¾½°»»±¾¿®½»¯»¾°¿¼®¾¾¯½¼®À»¯¼¿¬½»¯À¼¯»½¬»¾¯¾½­»¹­»¾­º¼­¾¾±»½¬½»¯¹À¬»º¬¾¹®¼»«º¼«¹¹­»¾¬¸º³½º¬·»«»»¯»¹«º¹®¼¼¬¸¹®»»¬¸¸­··«»»ª·¹¬·¹®¸»ª»·ª¹·©º¶¯¹¸¬¸º¬·¹¬¸»«º·¬¸·¬»¥­¬²«±°µ¯µ± ¶²¡³²·®µ° ³±·®·¬µ°³°¤·°¢µ±¡·® ³²¶² ¶±³«·°¡¹µ·³¡µ¯´°¶³£·±¶±¹®¥¸®µ³µ­¡·²¤·³¡µ²£·±¤·± ³°£·³·µ£µ°µ´£·²£¶±µ³¢·²·¯¸µ¡º²¢·³¥¸³¤¸²¢¹° ¸±¢¹³¢·³¡·³¹²¢º²§¹²¡¸´§»³£»³£ºµ¥º³¡¹³£»´¥¼± ¸µ©¾µ¦»³¢½²§º³¢»·¡½·¦¿´¡½·¥»·¦»µ¥¾µ¥½¶¥»¶¥»·§½´£»·¥»·§½¹¥¹¸ª»·¤½¸§¼¶§½·¨¼·¢¼¸ª¾·¨¿¶§»¸ª¾¶¥¾º§¿¸¥¾·§¾¸§¾º«½¸¦Á·ª¾¹©¾¸«¾ºª¿¹©¼º§¾¹¬¼»¦Á·¬À¹«Á»§¾·ªÀ¸«»»ª¾º©¾¼©Ä¼ªÁ¹®¾»¨¿»©Á¸ª½»ªÃº©¾½§À¶©À»¬¿½ª¿»¨Â¹©Á¾«Á»®Â¾¬Á¾¬Ã½®Ã½®Á»­À»ªÂ½¬Ä¾±Á»©Á¼¬Ã»­ÂÀ©Â¿­Â»±Á¾¬Á¾®ÃÁ¯Ã¿¬Á¾®Æ¾°Á¾¬Ã¼¬Å¿°Ã¾¯Å½®Ä¿¬Ã¿¬Æ¾®Ã¾­À»®ÃÁ­Ã¿«Á¾¬Ä¿­ÄÁ¬À¾¬Ã¾¬Ã¾©Å¾§Á½¬Ã½¬Á¿®ÃÁ®Æ¾¬ÄÀ­Â¾¬Á¼ªÂÀ¬Â¾©ÄÀ«ÃÁ¬Å¾¬Ã¾ªÃ¾¬ÃÁ®ÃÁ°Å¾®ÄÀ¬ÁÃ¯Ä½¬Ä½¬Ä¾«Ä¼¬Ã¾©Ã»ªÀ¾¬À¾¨Â¾¬Â»ª¿»©Á»ªº¸¤¹²®¨§~~gtUqUx`~~`{gi_w`{Yt[rY~qY_gnng|`qY|iIudQ|n]xb~|dzq_|kWxfQtdS{nU|qbgnogn_klnowkk``z`o[z[|bgkkxfzdYr]Ko[Dn`ItbQtgUtuYzw_{{b~zdzdz`r]qWu[tYzYxd]~w[|xWrSzoSwnYznOwnSznSzr]|uY|Y~[dbikq|{¢|­¢¯ Ã§É®Æ¬Í®Î²ÖµÞ¤·ß¨»â­»â¬ºÜ£·Ø¸Ê²Ï³Ê´Ï±×¥µÔ¢¶Ì¢³Ë ²Î§³Ô¤¶ÎµÀ°Ä­¹¨®£³¢©¡zrof`_{W~wY~wSztS{tSxqSzqWzt]{{``|gdduUqSqUnU{gW|nMxkSrgOrdOqdQtdQqgKofKo`KqfOnbKn]OqbIk`OndKodMlfKk_Mn]Fl`Kl_Il`Kg]Di]In[Ii]KkYMidKkgIkgKr`QidOkgOqdOqfMtnUxlUtkUut[znUwiUtt[{nYzkUtkQrbIq`Uuo[xnW{xg~ ¥¡«·©¹Á±¿Ã¯ÄÂ¯ÁÃ³ÄÄ´ÄÁ²ÄÂ³ÈÄ³ÉÄ³ÆÈ´ÈÆ·ÉÆ°ÈÄ³ÆÄµÆÃ³ÉÅµÆÆµÇÆ¶ÇÆ·ÊÇ·ÇÅ±ÊÅ´ÈÆ·ÊÇ·ÇÄ³ÇÈ²ÈÅ³ÊÆ³ÈÄµÇÆ°ÄÆ³ÈÃ³ÈÄ°ÈÃ²ÇÃ·ÆÈ²ÌÄ°ÄÆ´ÇÄµÇÄ²ÈÃ´ÆÃ³ÃÄ±ÈÃ²ÈÃ²ÆÁµÈÃ³ÆÅ³ÄÅ²ÆÂ±ÄÀ²ÆÃ²ÆÂ°ÆÄµÈÁ²ÇÄ²ÆÄ°ÆÂ³ÄÅ³ÇÃ±ÆÆ³ÈÃ²ÄÃ³ÆÃ³ÆÆ³ÃÁ°ÄÃ³ÅÃ²ÇÃ²ÆÃ´ÆÂ³ÅÂ²Ã¾¯ÃÁ°ÇÁ°ÆÁ®ÄÁ¯ÂÁ±ÅÀ¯ÃÁ´ÁÀ®Ä¿¯Å¾®Á¾¬Á½°ÄÀ®ÆÀ°ÃÀ°ÂÁ±ÁÁ¯Ä¾°ÅÀ¯Â½®Á¾³Æ¾­Â¾°ÄÀ®Æ¿±Á»®ÁÀ®Ä¾¬Á¿°ÅÀ°Á¼­Ã½­Â¿«Ã¾¬Á¼®Ã»®À¾¬À½­Á½«Å»®¾¾®Á¾©À»¬À»¬Á½«Â¼­Á»«À»¬¿º«¾½«Ã»ª¾º«¾¸®Á»ª¿»«¾»«¾»¨½»¬¿¹¬Áº¬¾½­À¸¬¾½­¾»«¿º©½¸ª¿¸«¾¹¨¿»¬¾¹®¿º«Á¹­¾¼¬½»¬¿»­¾½«Á»«¾»¬¾¹«¼½¬¾º¬¼º¬À»ª¿¹¨»»¬Á»§¾¸¬¾¹«»º«½º«¾º¨Áº¬»¼¬¾·©¿º¦¼¸§»·¬¾¸­º¸ª»·«»»¬¼·§½½¬¼·¨»»©ºµ©»·©¾¶ª¼¸©»·©º·§ºµ§º·¨»º¨¸µ©»¸ª»¸©»·ªº·¤»²¨»¸¦»·¦¹µ©¸·©º´§»µ§º·£¸¶¤·´¤¹µ§¸·¥¹±§··¤¸³¨¹µ§ºµ¢»´¦º´¦¹³¦·°¦·µ¥·´£·´©»³§¶´ª¸³µ°¢¶µ¤¶¶©¸µ¥»²¢¶³£¶´¦º­£­µ£²³¢¶´¢»³§·²ª·³§µ¶¤´³£µ¶§¶³§µ¶¨¶¶¢´¶£µ·¦¶³¦··¨·¶¦¶³ª·²¥¶·¨º·§¸´©·µ¤·³¦¸¶¨¶¶ª¹¹§¶³¥¹¶¦¶³«¹³§·µª¹´ªºµ¨¹·©¹³¬¶·¦¸¸«»µ¦¹¶¥¹¸¬¸µªºº©ºµ¦µ¶¬¹³«»¶©º¸©»¸¨¶·¨·¶ª¸·ª»·¨¹¹¦º·¦¹µ¦¸¶¬»¹¨¼¸¨º¹«¹º¨º·¬»½¨··¬»º¬»º©º»­»º«º·¨»»©¼»¬»·©¾»±»¾¬½¼¬¼¸¨¸¾®¾»«½½¯¿»¬¿»®»¾°»»®¾¼­»ºª¼½²À¼¬»º­»½®½»®¾½¬À»¬¼»®¾À«½¼®¿¹¬¿¿¬»¼¬¾»¯»¿±Ã¾¯À»°¾»¬¿¿¯Á½°ÁÀ¯Á¼°À¿°Á¾°Â¾­¾À­¾À¯Á¾¯¿¾°ÂÀ°ÁÀ¬¾À³À¿®¿Áª¾Á³Á¾®Ã¾¯Â¾²Á½®À¿®ÃÁ²¾Á±Á¾­Á¿²Â¿®Ã¾°ÆÁ¯ÀÂ¯ÀÁ±ÂÁ³Ã¿´ÃÃ²ÁÁ³ÃÁ­ÃÃ°ÅÂ³ÅÁ²ÃÃ³ÁÁ´ÂÀ±ÃÂµÆÁ³Á¿³ÄÁ³ÃÁ°ÃÂ±ÅÁ³ÅÂµÆÅ¶ÆÁµÄÁ³ÄÆ³ÆÃ¶ÅÄ³ÃÄµÆÂ³ÅÃ°ÄÃ°ÆÃ´ÈÁ³ÃÄ²ÆÄ³ÆÁ²ÃÇ°ÅÃ´ÃÅ³ÃÅ°ÅÂ·ÃÂ´ÆÂ³ÃÂ²ÅÅ³ÆÂ³ÄÄ³ÆÁ³ÃÂ³ÆÆ³ÅÂ³ÂÄ³ÆÂ³ÃÃ³ÆÅ®ÃÅ³ÅÁ³ÈÄ´ÅÁ´ÆÃ²ÄÃ³ÃÁ¶ÄÂ´ÅÃ±ÅÅ³ÅÁ®ÆÅ±ÅÃ±ÁÂ³ÃÃ°Ã¾²ÆÃ´ÄÁ°ÁÁ¬»»®³µ¦±± §¦u{iw`dkqtnii{fzdxbnnrrol~k|u]o_wqf{l~o{zn{wb{n_zo_{z`x~iqrzutuqxwz ||ttkud~fgxtw~|k|nfxiWobWqd[oqWt{`xxg|k~lkiikgkkblkg{gd{[~zb|{dxz`{|`||bffiogtu§¬µ ¹¥º©Á¬Å®ÈµÍ ³Ó¡·á¥»æª¿é¯¿ç³Âë³Áç¶Áç³Ãë·Ãç¬Ãå«½Ü©¼Ö¬ºÕ­ºä¯¹ä´¼à®½Ú³»Þ´½ß´¾Ý¬»Õ©»Ê¤³Ë¢³Å¯Æ®º¨°¡¬«xqlgbb|xgwzb|{dz`zi{gnoxxog~g||`~wbztbxt`wt`xnYuoYtk]tg]ro[oo]oo[lq_rt]or]oo]uoUnk[nnWkiWq`Ykl[ln[llYknQli[odUknUkn]ow`oq[ln[uk[qiQnl[lo[qu_qrkuz_zrft{`|u`rodui~|dqbuxbxoWoi[uuf|xf{xf~t¦©·®´¿°¾È»ÇÉ´ÁÈ»ÈÈºÇÉµÇÆ¶ÇÊ»ÉË»ÊÍ»ËÉ»ÈÌ»ÊÈ»ÌÊ·ÆÆ»ÈÉ¸ËÌ¹ÈÈ·ÅËºÌÊ»ÊÎ¹ÇÉºÉÊ¿ÌÍ¶ÉÊ»ÈÊ¹ÈÈ»ÈË¼ÇÊ¹ÊÊ¹ÊÉ¸ÈÊ»ÉÈ·ÉÇ·ÇÉ´ÆÉºÊÈ¹ÊÇ¹ÊÉºËË»ÊÈºÈÆºÆÇ·ÈÉ¼ÈÆ¸ÈÅµÇÅºÆÉ¶ÈÊ¹ËÉµÆÈ¹ÈÉµÈÈµÆÈ½ÈÅ·ÇÇ¶ÆÆ¸ËÈ¸ÈÇµÄÈ¸ÈÆµÇÉ·ÇÅ·ÇÈ¸ÉÆºÇÆ¹ÈÆºÊÇ·ÆÆ´ÇÆ·ÆÅ·ÈÇ³ÈÄ·ÇÆ´ÆÄµÃÈ·ÈÃµÆÄ¶ÅÂ³ÅÅ·ÅÄ·ÃÆ´ÅÁ³ÂÃ¶ÆÃ´ÆÃ³ÃÁ¶ÅÃ²ÁÅ³ÅÁ³ÅÆµÃÄ³ÄÃ³ÂÃ·ÃÄµÆÃ´ÁÅµÆÂ·ÀÀ³ÃÅ±ÃÃ²ÄÂ·ÃÂ²ÄÅ´ÆÃ³ÁÂ´ÂÃ´ÄÂµÂÁ³ÂÀ³ÃÂ³¾À¯ÂÁ±ÄÂ²ÂÁ®ÁÁ³Á¿µÁÁ±¾Â´Á¾µ¾À¯ÁÀ±¿½¯¾¿³Â¿±À¿²¿½°ÁÀ±À¾¯ÁÁ±¿¾³¾À³ÁÃ°ÀÀ¯¿½°¾À³Á¿³¿Á±¿À³ÀÀ±ÀÁ°¾Àµ¾¾³ÂÁ°¾¿³ÃÀ¶À½­»Á³ÀÃ³Á¾³¾À³¿Á°¿Â³ÁÁ³¿À±¿À°Á¾³¿¼¯ÀÁ²»¼®ÀÀ°À¾³¿½²¿À­¾¾°»¾³¾À°À¿®¾½°¼»¯¾¾²½½®¾¾®¾À¯»º­¿¿³À¼­¼»¬¼¼­¼¾®¿¾²¾»¯¼¹¬½¼®½»¯¿½¯»¼°¸»®»º°½¾¯»¾­¼¼®¼º®¾½®º»­»º°¸¼¬¿»®¹¹®»¹¯¼»¬¹¹¬º½­»¹¯¼º®¾¾®·º«»·«º¸©»¸¬¶¸­º»«»¸­ººª»¶¬¶·¬¼·®¹¹¬º¹¬·¹­»»¬¸»¬··­·»®¹·¯¶¹¬·¤±°²¬³¯´­´­µ²µ¯²­¶­ ´¬µ¬³¯·°·°¡¸°´¯¶­²¯·®¥µ¯¶¯¶­µ®´®·®¶®¡·° µ¯·° ·±£´²´³¡·±£¶²º°¥µ²¡»³£´° ·²·­ ¹³¸¬¡·² ¸³¶¯µ³ ¹² ¸±£¶±¢»²£¸²¸°¢¹³¥º¯¡¸³£º²¢º´¸±§¹²¤º·£¸²¡µ³£»´¤¸µ£»²£¹¶£º²¤»´¤»³¢»³¢¹³¥»·¤¹³¡»µ£º¶¦»µ§½¶¢½²§¾·£»·¨À´§¸¶¥º¶§¾¶¨»µ¡¼µª¾³¥»µ©»·¥¼µ§½·ª½·¥»¶£¼·§¼¶¨¾·§¾·§»·¥¾·ª»¶¤¾¶¥»¸¨Á¸¨½·¦¼·£»µ§À·¦À¸§¾º¬Á·¥¾»¨À¸«¿º¦¾¶©¼»§»¸ª¿¼¬½¹¨¿¹©¿º§Ã¹¬¾º¨Á¹ªÁºª½»§¾¸ªÃ¸¨½¹§Á¼«Áº¥¿»«Ä»ªÁ¸ªÃ·«Á¾«Ã¾«¿¼°Ã»ªÁ½¬Á»ªÃ»«¾½ªÁ¼«Áº¬Æº®Á»­Ã¾­Ã¼¬Â»©Á»®ÃÂ°Á½­Å¿«Â»¬À¾­Ä¼¬Ã»ªÅ¹­Ã»ªÀ»©Â½¬Ã¾©Ã½«Á¼©Ã¼¯Ä½¬Á»¬Ã¼®Ã½«Ã»¬Ã¾®Å¾°Å½¬Á¾«Ã»«Ä¼®Á»®Ã½­ÄÁ­Ã¾¬Ã¿©ÆÁ®Ã¾®Ç¼ªÂ¿®Ã¿®Ã½ªÄ¿¬Ã»«Ç½¬ÃÀ«ÅÀ®Ã½®Äº¬Ã¿¬Ä¼²Á¾­Ä½¬À¾«ÀÀ­Ã¾©Á¿©Å¼¬Á¾¬¾º©¼µ¢»°²¨©nq[nQr[|z`gggdz_w[|oY|lW~t[fkwbz`f|`qW{fY{kMtqYzu`ziYwrWxkMxgQuq`||[xbfqqnig~lkknutng~boYq[~|]~|d{g{fq]xbWr`MrUIl]FobOwlUzn`{z_dffxd|`_```|[~]|]z][~w`z]||Yt[|zW_[`dino£r©°£º¨»«Á°Ë²Û¸ÛºÚ ¾â£½é¦¾â­Âã²Åà²Åß«Ãß°Çæ°Äé®Êë°Æï²Æí³Èé©Áâ¢Àß¨¾Ø¬¿Û®¾ß°Àâ®½ßµÁá³ÃÝ­ÀØ®½×¦½Ò¡¸Ð ·Ì·Ã¬º¨·£«~£xoibz_wWtU|rU|tUxtW{u[{w_zzbzuiigllffbwYxUztW{nQnWtgQxgOtbOrbMqdQqbQokStfMn`Oo]On]InYKi]FkYOn]KkYQl]Ik]OkYIg]Kk[Fk]KdQOl]Ik`QlWKq_BkYMi`MqdOnfQqiWrlStk[riS|fSwqY{t_|g`tkSzgOx_Mu`YrkYxnU{q_~ ¬ ®·¤³¼±ÁÀ®ÀÃ®ÃÅµÆÅµÈÄ±ÆÄ·ÉÄµÉÈµÈÆ·ÊÄ³ÊÃ°ÈÄ²ÇÄ¯ÈÃµÇÇ°ÈÆ´ÈÃ³ÈÆ¸ËÄ¸ÊÇ´ÊÆ¸ÇÄ²ÈÃ°ÉÅ³ÇÃ¶ÊÅµÇÆ³ÆÃ³ÅÄ´ÈÁ±ÆÃ´ÈÄ²ÇÂ³ÈÄ´ÇÅ³ÈÄ¯ËÂ´ÉÀ°ÈÃ°ÈÂ³ÆÃ²ÈÃ²ÅÄ°ÄÁ²ÈÄ¯Å¾²ÈÃ³ÇÂ±ÆÃ±ÂÀ²ÃÁ°ÊÄ²ÆÄ³ÇÁ°ÆÁ³ÅÁ²ÃÂ²ÈÃ³ÄÁ°ÃÃ±ÆÃ±Æ¾°ÆÁ³ÅÁ³ÆÀ³Ä¾¯ÆÀ­ÅÂ³ÆÁ®É¿²Ã½°ÃÁ°ÆÀ°ÅÁ¯Å¿¬Å¾¯ÇÀ°Á¾¯È¾¯¿Á®Ã¿¬Á¾«Ä½¬Ä¾¯Á¾®Ç¾­Ã»¬Ã¿°Æ¿®Ä¾®Æ¾®Ã½®Ä½³Ã¾¬Ã¿¯Â¾­ÂÀ¯Ä¼¬Á¾±Â¿¯Å»¬Ä½¬Â¾°Â¿¬Ã¾±Æ½«À»¯Å¾¬Á»¬Â»¬¿¼«Áº­Ã½¬¾»«Áº¬¾º­Á¸¬À¼­Á¹©Á»­Áº¬¿»©Ã¸¬¾»¬¾»¬¾¸¬¾º«¿»ª¾¹¬¾¸¬½¹¬¾¹©¿½«¾¸­¾¹ªÀ¸«¾»«»¼¨¾¸©¾º¬¾¹§Á»¬¿º«À¸©À»¬¾º«¿»«À·©½º«¿·«¿ºª¿¼¬¿·ª¾»§»·©¾º­¾¹¬¾¸©¾¸©¾·¬¿¸¬¾¸«¼¸¨»½«¿·¦¾»©¼·©»º©¿¶ªÀº«¾·«¼´©¾¶¨º·©»µª½»ª»µ¬ºµ©¾µ¥º·§»¶©º·§ºµ¦½·§¹·¨»µ§»´«»·«¼¶§»¶£¹´ª¼µ©»µ§½¶¨¼·¤»¸¦º³§º·¦»µ¦º´¨¸µ§¸´¨»¯§··¨ºµ¥º¶§·µ£·¶©¸¯¦º³£·´£·²¦¸³¤·µ¡¸²§··£º³£¸´¦»²¥·±¦·µ¥·²¦·³£·´§·¬¢°³¥¶³§µ´¦·¹¤·³£µµ§··¤³³¡·´¤¶¶¦··¢³²¤·¶¤º³¥´²¦¸´¦¶³§µ±¨»³¦µ³¥³³¤¶³¨·³¦´·¨¼¶©·¶ª··¬·³¦º·«µ¶«¹¶¦¶µ«·µ§¶³©»¶¨¶´©»³¥¶·­¸µ§¶µ¬»·¨ºµ§¶¶§µ¶¨·¹§º¶¬º¶¦º¸«º¸¦¸·«»¸¤·¸¦¹¸«¹º§¹µ©º¶¨º·ª»¸¬»¹ª¼¹§ºº¨»·¨¼¸­¿¸¨¼º©»¸¬¼¸§»´¬½·«ºº¨»º­¼¹­½·ªº¼¯¼»«½»«»¼­»º®¿»¬¹¹­¼º¬¾¹¬»º¬»¹­»»¬»¼®Á·®½¼¬½»¬»¹­Á¼­¼»«½»©¼¾­½»®¾½®¾»®À½­¾½­½À±¾¾±À¾°À¾±¾»°¿¾¯ÂÀ°¾¼­¿½±½¼®½¾­ÀÁ¬Á¼°Á¾¯¿¿­ÀÁ¬¿¾­ÀÁ±À½¯À¿®¿¿°ÁÁ³ÄÂ¯Á½¯Á¾²ÀÁ±Ã¾®Ä¾¯¿»¬ÃÀ¯ÁÁ²Á¿®Á¿°Á¾¯Á¾¯Á¿°ÃÂ°ÂÁ±Â¿°ÂÁ³ÃÀ°ÂÂ³ÃÀ³ÂÃ±ÃÀ³ÂÀ­ÁÂ³ÃÃ±ÂÁ²ÄÁ³ÂÀ­ÃÀ³ÅÀ³ÄÂ±ÂÁ²ÁÁ³ÆÁ²ÆÂ°ÇÁ¶ÅÀ²ÅÃ¯ÃÂ¶ÃÃ³Ã¿®ÃÂ°ÃÁ³ÃÁ¯ÅÁ³ÅÃ°ÃÃ³ÁÂ³ÄÁµÅÃµÄÄ±ÁÆ³ÁÁ±ÇÄ³ÆÁ³ÃÃ³ÆÃµÃÃ³ÂÂ±ÃÂ³ÃÃ³ÅÂ³ÄÃ°ÃÅ³ÃÃ³ÉÂ´Á¾³ÁÂ¶ÃÃ±ÅÂ³ÃÅ³ÂÀ³ÄÅ³Ã¿´ÂÀ®Á¿­Ã¿±Á¿¯Á¾¯Á¿®Á¿¯¿¾¬»»ª¼¶¨·³¨¥¡|iwbw`{gononrid{nb{t`|gqnkttof|o]|t_wub|nbxx]xubzn]wxd{n{unzzzwtrtzwwzwikzg{dkoi~o{ukzo`riWod]ngQrq]qq`w{b~uuurtkloknnoifkdikifloqrw¤z¤¬ ´¥Á¬Ç°Ð³Ø·Þ¤¼äª½è°Âî³ÆïºÅö¹Êù¿Ðú½ÎúºÐö¼Ð÷½Ðù¼Ð÷¾ÒùÁÏúÂÐùÄÐöÁÊó¸Íí³Èæ³Åë³Âï·Æð»Æð¾ÆòÁÆð»ÇðÁÆï¾Èì»Âæ¶Àâ³¿Ù«ºÐ ¶É¡°Æ¬¾¦¬¨wungd`zb|{`zzbxzbz{b{gin|nu~u|tkidwbubuuduq]tlYokWofYqiWni[qfSkfSkf[lgWlkUffMo`So`Wi`Sl`WodYigQkdOkbOl_SidUidSgfWlfUnfWoiWii]niUoi`nk_wu]rubur_ww`|udz{i{wizub{ubzg_qkWrk_uuY{tg{³¥­¾¬·¿³»Ãµ¾È¸ÆË¼ÅÊ¾ÊÌ´ÉÆºÈÊºÈÌ¾ÉÌ¾ÊÌ»ÊË¼ÈÌ¹ÊÈ¹ÈÊºÈÈ¸ÈÊ»ÌË¹ÊÌ¾ÊÊ¹ÊÈ¹ÉÈºÌÌ»ÌÊ¼ÊÊ¹ÌÈ½ÊÇ¹ÈÊ»ÈÊ·ÈÈ¹ÆÊ»ÈÇ¹ÊÊ¹ÉÈ»ÆÌºÌÈ»ÆÊ·ÊÇºÅÆ·ÊÊ»ÆÉºÈÆ¸ÈÈ¹ÈÈ¸ÉÈ¶ÆÈ»ÆÅ¹ÇÈ¸ÇÈ·ÉÈ·ÆÇ¸ÆÇ¹ÈÅ»ÆÈµÅÇ¹ÇÊµÆÆ¼ÉÈºÆÇ¸ÈÅµÅÆµÈÆ»ÄÇ¹ÆÉ·ÈÃ¶ÅÃ¹ÈÇ·ÈÆ¸ÈÆ¸ÆÄ¸ÈÄ·ÅÇ·ÇÈ·ÈÆ·ÄÃºÆÅ·ÈÃ¶ÇÃ·ÅÃ·ÆÃ¶ÆÅ·ÄÁµÁÃµÃÆ·ÆÂµÅÅ´ÅÄ¶ÃÁµÄÂµÄÄ³ÅÂµÇÃµÁÃ¶ÃÃ¶ÃÃ¶ÃÃ·ÂÂ²ÅÃ·ÆÁ³ÁÄµÄÃµÄÁ´ÃÃ°ÁÁ·ÁÃ´ÅÂ´ÄÆ´ÆÁ´ÃÆ¯ÃÀ³ÁÁ³ÁÃ®ÄÀ´ÃÁ°ÀÁ³À¿³ÁÃµÀÂ²À¾³½½³ÁÁ¬Á¾°¿¿°Á¾³Á¾³¾¾°Á¿³Á½²Â¼¯Á¾°½½¯Á¾°¿¼³¾½°ÀÀ°¼½³Ã¿°ÀÂ²¼¾³ÁÀ³Á¾¯¼½°¿¼±À½´¼»°Á¼°¿¾·¼Á²ÁÀ¯¾¾±¾¾³Á¾±¿Á³¾»°¿Á°¾Á°¾¾²¾½°¾¾¯¿¼²¿¾¯¿¾¯ÂÀ°¾¾°¿¾³¿»¬½¼®½½°¿Á®¹½²Ã¼²»»¯»º±½¾¯¿¾±À¾³»»­¼»¯½»¬¾»¯»¾¬º¼²¾»¬½¼®½¼¯¹¼®»½®½»­»½®¼»¯½»±»·ª»¼­¹¹¬»º±º»­»·¯»µ®¼»¬¾¸°·¹¬º¸­»º¬»¸­¸½¯·¹­¹»¯º¹«»¹¬¹·«»»©¶½©¸¶­¹»¬¸»­·¹¬·µª¹·¨¹¼¨¼¹¬º¶¬¶¸ª¹¶¬¸»¬¹¸¨·§ ¯­°«¶¯³¬·­¶¯µ­´¬´° ·­³¬¡´­ ³¬³®¶±µ¯£¶°´¬ ³±¶±µ°¶®£·¯¡µ²µ¬³¯·²¡¶¬¡µ² ·®·±¶²£³°¢º±¡¶¯¸³ ·´º¯ µ³¦¶´¢¹³¢»²·³¢¶­¸³£·±¹´£º²»²£·±¡¹³£·±¢¹±¤¹±º²£¹³¤¸³¡º°¡¸´¢¸³¢¹³¡»°¡»³¥º³¡¶±¦»³¤»´¦º´¡¸²§¸´¢»µ¡»³¦»³£¹·¤¹´§¾³¤»·£»µ¤º¶£»·§¼¶¢»³£»¸§º¶©½¶¤»³¦¼¸¦¼·¥¼·£»²¥½¶£¾µ¦¼·§º¶ª¼µ¥¼¶©¾¸§¼·§¼¸£¾·¦¾µ¨¾»ªÀ¶«¾»§½·«»µ¨½·¬Á¹ª¾»©¾¸¥¾»«¾·¬¿º§¾¹§¾¸¨¾º¨¿¸«¾¹ªÃ»§¿»¬¿»©¿¸ªÀº©¾¸©Àº«¿¸§¿¸¨½·©¿»¬¾¹©¾º¨Á·¨Á»«Á·¨¾½©Â¼¬À»¬Á»«Á»¤¾»©Á»¬Ã¹§Ãº«Á»©Ã½«Áº¬Â»«Á¾­½¾«À¼®À½©Æ¿¬Á¾¬Ã½¬Ã¾©Ã¾¬Ã¾­Â¾«Ã½®Á¾ªÄ»¬Á¾­Â½§Áº¬ÂÀ«Àº«À½­Ã¹¬Ã¾ªÃ¾­Ã¾«¿Á¬Ä¾°Ã¾¬À½©Â¼ªÆ¼­Ã½ªÁ¾­Å»®Á¾¬Ã¼¬ÂÁ­Ã»«À¾¬ÆÀ®ÅÃ­Æ½¬Ã½«Ã¼«¿»«Ä½«Æ»«Æ¾¬Â¼«Ã½¬Á·§¾·©Á¾®¿»§Â¹¨À»¥Àº¥¾º¥»² µ¬¬wwbuUrUrYr`z`{_~bg{]xftWgQ|iWz_{bxb~`gfzd|nU|`OufOxgQriUtlUwgMudWww`tdgning~kddfiki~ifz]qW|lU||`db~~b{n]tdSt]Oq`Ir`Mo_MtlUwq_gkl|kdfndf|b~bfb__|`z_z]~b`filnut§{°¢¸¦Ã¯Ê¶Ó·Û¾ß¥¾ç®Âï®Æë²ÈëµÊóºÎõ¾Ìõ½Ñö¾ÓøÃÑúÄÓúÄÓúÃÕúÂÓúÄÓ÷ÄÒ÷ÁÐù¿Òõ»Ðì³Ëå³Æê³Æï»Çî»Çë¼Èô¿Éò¾Êë¿Æí»ÇìºÇãµÂä²¾Ûª¾Õ ¸Ê±Ä¬·«¬¢|togf_Y{YxU|qS{qU|o]~t]{{`]{_x]~bdn{g|`ub|tY{tUwqQ|iOtbKt`Qo_Ir[Dk[MnYFlYKl_IgUOlYKoYIgYIk]Dl]FkYKgQDk[MiYIiYFgYIgODiWBkYFl[Di_KlYMl`In[Mq_Fn`QlnSwkWut]xr]~qYzt`|w_oSugQzfQwbKrbQtr[ukW~ogz¡­¡¬»ª½»¬¿À®ÁÅ±ÃÃ²ÇÅ¶ÈÄ³È¾³ÉÆµÊÈ³ËÅ¶ÈÅ³ÈÄ¶ÇÄ³ÊÇ¯ÈÃ³ÅÅ³ÇÂµÈÄµÈÃµÈÆ´ÉÈ¶ÇÆ³ÇÆ³ÈÄµÇÃµÇÃ±ÇÄµÈÃµËÃ³ÆÅ³ÊÄµÆÃ³ÉÆµÈÀ³ÈÃ´ÇÆ·ÆÁ´ÈÅ²ÊÃ³ÇÁ´ÈÃ³ÄÄ±ÇÂ¯ÉÃ´ÅÁ°ÈÃ±ÄÃ±ÄÁ³ÈÁ¯ÆÂ²ÃÁ³Ä¾²ÄÂ²Æ¾°Ã¾¯ÅÃ±ÆÁ³ÇÁ²ÃÀµÃÁ²ÅÃ°Ä¾³ÃÀ±ÅÂ°ÇÂµÆÀ°ÆÁ¯ÃÂ®ÇÁ°ÃÁ¯ÃÄ°ÆÁ­È¿µÅÁ³Å¾±ÆÀ¬Ã¿®Â¿®Ã¾±ÃÀ°Æ½®Â¾®Ã¾¬Á½®Á¾­Ã¾­Ã»­Â¾¬Ã¼­Á½®ÁÀ®Â¿­Ã¿¬À½¯Ã¾¬ÁÁ®ÁÀ¬Á¾­Ã½¬À½¬Á¾®Å¼®Äº­Á¾®Ã½°¾»¬Ä½­Â¼¬Ã¾¬Ã»¬ÃºªÁ»«¾»¬Ã¾¬À»¬»¼­Ä»¬¾»ª¾¹§¾»ª¾¹«¿»«¾¼§»¹¬Áº¬¿·©¾·©¾»«Á¹¬¾¼¬½»©¾¸­À»ª¼¸«¾¶¬¼ºªÁ»ª¼·«Áº«¾µª¿¾«½·¦¾º©»º©¾¹¨Àº¬¾¼«¿º¬½·ª»¹«À·¬½º«Á¹©¾·«¿¹¤½º­Àº¬¾¹ª»¶ª½º¬½»¦¼·¬¼¸§»¹¨½»®½·ª»¶«¼¹«¼·«½·ª½¹¨º·ªÀ·«¼¶¨¼·¨½·«»¸©ºµ©»¸©¼¸§¾µª½µ¨»µª¾·¨¾µ©º¶¨ºµ§º·ª»µ¨º³¥¶¶¦º¶§»µ§··«¸³¨½¶§¸³§º²£ºµ§¸µ§·³ª»·§»·§¸µ¦º´£½³¦¸±¥¹³£¸¶¢·±¤·²£¹µ£¶²©¹µ¦·±¤º³©º³¥·³£·³¤¹³¦µ¯¤¸²£·±£¶´¢¶««­²£²µ§µ³¤´´§·³§¹³¥·¶¢µ´¢´³£¶´¥´±¤·²©µ´¦·³¤¸°¦·³§¶·¦µ²«¶¶§·¶¤µ²¨¶´¨µ´¨³¶£¹³©»·§··¨·´¥·³¤··¦¸¶§º³¦´¹¤º²¨¹¶¢¸·¨¹¸ª¸µ¦¶·ª·µ«¸³§¹¹©ºµª·´§··§¹´§»¶¨·µ¦»´§¸·¬¾¶§»·§º·«»¶¥¹¸©¹³©··©º¶©»¹¨½¶¬º¹©»º®»¶©º¹§º¸ª¼¹¬»µª»¶ª»º©½¹§º¹¬½·¨½·ª»¹©¸·¬¼¼­»¹¬º¹­½·¬¾º¨»¹¬¿º¬¼»¬½¹¬ºº¬¼·¬¾»®¼·¬»»¬¿¼°¾ºª»»¬¼·¬º»¬Á»¬½»°¾º¯¿¼©À¿®ºº¬¿¿ª¿À³¿¾­¼¾°¿¾¬¼½¯¾»®¾½²¿¾­Á»¯Á¼®À¾°Á¾­¾½¬Á¼±Á¼®À¼¯¾½®À»®ÃÁ²ÀÂ­À»¯ÂÁ¬¼¼®¾½°Â¼¯À½¨Â½®ÁÀ¯Á¼®ÁÁ¯Ã½°¿½¬ÁÀ²ÁÁ¯Â¾®½Ã±¾¿°ÃÂ¯ÀÀ³ÃÀ°Ä¾³ÀÁ±ÂÂ°ÁÃ±ÂÀ¬Â¾³Ã¿³ÁÃ±Ä¿²Ä¿±ÁÁ¯Å¾´ÁÁµÅÂ±ÃÀ³ÅÁ²ÅÄ²Ã¿®Ã¿²ÅÃ¶ÂÂ´ÄÃ²ÅÃ°ÃÂ³ÆÂ³ÄÁ°ÃÃ³ÃÃ´ÅÃ³ÂÁ³ÆÂ³ÄÄ³ÅÃ´Æ¾±ÃÁ²ÆÁ±ÃÀ±ÆÂ²ÃÀ±ÀÃ°Â¿°ÅÅ¶ÇÂ²ÇÅ³ÃÃ´ÅÃµÂÀ±ÅÅ¯ÄÁ³ÅÁ¯ÁÁ³Æ¿³ÄÁ³Ä¿°ÅÃ²ÁÀ¬Á½­Ã¿¯ÃÂµÅÁ¯¾¿®¿¾°¼»¬·µ¡°¦¥|kzf|ibxknl~lll{dwf|u`|tfon{ounuo{d~lbxg[tn]zo`uo`wn_wgYtxk~|i|qqxttok~ttqoqqq~gw_r`|ioqq|gz`]rbWq[SnfUof[rrf{o~xwwuuoqtknlkooooqrlourx¢x¥¬¡¶¥¿®È­Ð·Ù£¹Ü¦Áä±Âï¶Çø»Í÷»Ìö¾Ðõ¿Ðù½ÑúÂÖúÁÔúÈØúÅØúËÚúÐÙúÎßúÍÝúÊÛúÊÚúÊÙúÍàúÈÚúÈØúÂÕú¾Ñò»Ëò¿Ìó¿ÉïÁÈöÇËõÃÊðÁËð¾ÊðÂÈïÀÆô¿Æï¼Çâ®½Ü¨»Ð¡µÆ²½§´¢®¬¢x{llkd_~zdw_|qbz{kf|q~i~lzknlqkli{{f|t]zu]oq]uo_qn]qn]ugUr`WndWlbSkfUn`]n`WkbYndWl[Wk_Og]Si]WlbWibQi[Yi]OkfSngSlgWkbUkdSndYl`Qki]qibztburfzql{~i|xqfw_{ofww`|k[ui[to`wq_wui~|±¤®½¬¶½®¾Ä´ÀÅ¶ÃÆ·ÈÈ½ÉÉµÈÇ¹ÉÉ¹ÊÇ·ÊÊ»ÈÉ¼ÊÉ½ÉÊ»ÉÈ»ÌÊ»ÎÈºÉÆ»ÈË»ÈÇ»ÈË¹ÊÊ¹ÇÉ¹ÊÈ¹ÈÈ·ÈÉ·ÇÊ»ÊÈ¼ÈÊºÌÉ»ÊÈ·ÊÊ¹ÊÇ»ÊÊºÈÇ¼ËÇ¹ÆÆ¸ÃÆ·ÇË½ÇÆ¸ÉÊ·ÊÊ¹ÈÉ¶ÈÅ·ÈÆ¶ÇÆ¹ÇÈ¹ÈÈ¸ÅÄ·ÆÅ¶ÆÅ¹ÄÇ»ÆÄ·ÅÆ·ÆÇ¹ÈÇ¹ÉÆºÆÃºÉÄ¹ÈÆ·ÆÇ´ÊÆ·ÅÆ·ÆÃ»ÇÆ¶ÆÆ¶ÈÅ¶ÆÃ¶ÄÂ³ÅÄ¸ÆÄ·ÇÆ¹ÆÄ¶ÅÃºÈÄ¹ÄÂ¶ÅÅµÅÅ³ÃÅ¶ÆÂ·ÆÃ³ÆÁµÆÃ¶ÈÆ¶ÃÃµÂÂ´ÈÄ³ÃÂ¶ÆÆ´ÄÁ³ÃÄ´ÃÅ³ÃÃ³Ä¿¶ÅÃ¶ÆÁ³ÅÄµÀÃ·ÄÃ´ÃÂ³ÅÂ³ÃÃ´ÄÂ¸ÂÃ¶ÃÁ±ÆÀ³ÁÁ´ÂÃ³ÃÀ³Ã¾¶ÃÁ³ÁÃ³Ä¾­Á¾µÄÂ³¿¿¯Ä¾³Ã¾³À¿³Á¾²ÂÀ°Â¾¯À½¯À¾°Â½µÀ¿²Ã¿³Á¼°¿¾²Á¾´À¾³Ã¼°¾»±ÀÀ®½Á¯¾¾¯¼¾°»Â²Á½³¾½³Â¾²Á¼­¾¾¯À¿°À¼²¼¾³¿À°¾¿²¾»±¿»¬Ã½³¾¿²½¿±¾»³½À¯À»¯¾»³Á¿³¿¾±¿¼°Â»®½¾¯¾¼²¾»²Àº­¾¿°¾¿²¾½°½½³¾¼±ºÀ¯Á¿³¾¼±¿»­½¼­»»°½¼±½»®»»²»»®¿»®¾¸°»»¬¼½°¾»¬¾º²¼¹¯¾º®¿¹³½¶­»»²»»±¾¸±»º­»¼¬»¹ª»·¯»¸­º·¬»¼­»·°ºº°»¼¬½»®º·­¹¸«¸¹¬»¸®¼´«··®º·¬»»­¸·«¸·­¹¹«·¶«¹·¬»·¨¹µ©·¶«¸¶¬¹´¬¶»¬¼µª¹·«¹¦®«³¬³­´­¡³¯±¬ ³­¢·®³®´° µ¬¡µ¯µ¬¡µª±­³±¡µ®µ®µ­¶®¤¹®µ³²¯·­ µ³£·®¢·­ µ­¸®¢·³²² µ²£¸¬£·°¶¯¤¶²£·µ¸²£¶²¸°·®¡·±¹²¢·²»°¶²¡·°¥¸®¢·³¢µ² ·¶£·± »±¤¸³¡»²¢»³¥·³¡·° º³¥¸²¤»³£¸¯»³¡ºµ£½²£·´¢ºµ¡·µ¢¹²£º·¢¼·£¸´¡»¶¢»²¡½µ§»µ¡¼³¦»²£¾¶¤½·§½µ¨¼³¤½·¦¾³§º¶¥»³£»´¥¼¸¥¾·¦»·§»¸§»´£»¶¥½´§¿¸¥¾¹¥¾¹§¾·¥¾·¨¼¹¦¼º§¾¸§¼¸«¾¸©¾·¥¿¸¥¾·§»¸¨½ºª½¸¬¾¹¨¿·¬Áºª¿·¦½·¦¿¸¨¾º«¼º«À·©¾¹«Áº£¾»©Á¸¨¾º§Àº¦¼¸¤¿½§½º¦Àº¥Á»©À¸©¾»ªÀ¹«¾»©Á»¨Áº§¾»§Àº«À»©Á»©ÁºªÂ¹©Ã»®Á»¬Â»©Á½¤Â¾¬¿½¨À¾ªÃ¾¬Å¾ªÀ¿«¾»§À¾¬Ãº«À½«Ã¼ªÃ»¬Ä¾«Á½¬Ã¼­Â¾«Ã»¬Â½¬Å¼­Á»®Ã¼«Ã½¨Ã»¬À¿ªÆ¾«Ã¾«Ã¼­ÃÂªÁ¾­Æ½¬Á»¬Ã¼®Ã¾­Ä¾®Ç»«À¾©ÄÁ­Ã¼¬Á¼«ÃÁ¬ÄÀ¬Ã¾±Á»ªÃ¾ªÃ¾¬Ã¿®Á½¨Á¼¬Ä¾®Á¾¬Á¾«Ã¸ªÁ¾¬¾Â«Á»¦¿¸§¾¶¥·±¡³¥¦z|gqWl[zYt]{_w_|fbz`{_tWxlUgO{z_bzbiin_w[~nUwgKz_MtdUwqOtiSrdKtfUwtYzt]dklik{_ud`lkqdgq[~nUxiUwY|ddgt]w]MrYFqYIk]Ik`MtdOtq]{lkqkgnf_d~d|``fgbkllkklnq£t¬~³{£ºªÂ¯Ó·×»à¥¾ã¨Åç²Èò·Ë÷»Ï÷ÀÔø¾ÒùÂÕú¾Öú¾ÖúÃÛúÄÛúÄÛúËÞúÌßúÍàúÊßúÌÜúÊÜúÊÜúÈÝúÌßúÎÝúËÙúÉØúÁÖõ»Ïö»Ðï¹ÐêºËî¼Ëì·Éê¹Èë»Äó»ËïÁÇï»Çï¸ÆäµÃá¦¿Ô£µÓ¹Ì±¿¨±§©|¢wnkbd`[]tSnQzlSznWzw`||]]z]zdzdd~g{f|]{[|qUzkOukOrdQr`SldMn_MndIrfMgbOn`KodQn`Ko_IgWDkYFkW?iYKdSIgYFlYIn]FiYIk_Ik`Ik]IoWKi]Dl[In`Il`FqfUklSwlYztY|xfg~z_~oW|l[ur[zgSzbMtbStdSwkWztf{´¦°»¥¹½¬½À¯ÁÅµÄÅ³ÆÆ´ÊÃ±ÇÄ·ÊÆ´ÆÆ¶ÊÃ³ÈÈ²ÉÈ±ÌÃ¶ÈÆ³ÉÇµÆÄ³ÉÆ³ÈÄ³ÇÆ´ÊÃ²ÆÁ´ÈÃµÊÆ³ÇÅµÆÃ²ÇÃ²ÉÅ²ÇÆ·ÈÃ°ÇÄ³ÆÃ²ÄÃ²ÆÄ²ÄÃ±ÊÄ´ÄÅ°ÇÅ³ÈÄ²ÆÄ´ÆÃ³ÆÃ°ÇÂ°ÆÃ±ÇÁ²ÇÂ±ÊÀ±ÄÃ¯Ç¾¯ÆÄ±ÆÁ´ÇÁ²ÇÁ±ÅÁµÄÃ®ÃÃ±ÆÃ³Æ¾¯ÆÂ²ÃÁ±ÄÁ±ÆÁ¯ÆÃ³ÆÀ±ÃÂ°ÇÁ±ÄÁ²Æ¿®ÁÃ²ÅÃ¯ÅÁ²ÅÁ²ÆÁ³Ä½²ÁÁ¬ÃÂ±Ä¼²Â¾±Â½³ÃÁ¯ÃÁ®Ã¾²Ä¾¬ÂÀ°Ä¿­Ã¾±ÆÀ°Â¼¯Á½±Ã¾®ÂÀ¬Ã½­Á½¯Á¿¬Á¾±À¼¯Â¾²À¾®Á½­ÃÁ­ÃÀ°ÃÀ®¿¾©Á»­ÁÁ²Ã¾¬¾¾¬À»¬Á»¬¾»«Á½¬Á½­¿½¬Á¾«¿¹¬¿»§Á¸¬À½«À·©Â»¬Á¾«Àºª¾¹¬¿¾©¾ºª¼º­¼¸©¿¾©Á¹¬¿¹¬¾¹¬¾»ªÁ¹¬¾¹«½¹¨¿¸¬¿»©¿»«¾¹ªÀ»­¿º«½¸¬¼·©À·¬¾¸¬Á»«¿¸§¾º«¼¹¬¾·­¾»©¾½­½»©¿¸«¾·«½º®¼º¨¾¸¥¾·©À»ª¾¹«¾»ª»µª»¼­Áºª»¸ª¼·«»¸§½·©½µ¬¿¸¨¸º«»·§¾»©»¹©½¸¨¿·ª¼º©¾·«º¸©¼¸§¹µ¬»µ§º·§»µ§»·¥»·ª»¶ª½µ¤º´§º·¦º·¨¹µ¤¹´¦»´§º¸¦»´¨¸·¤»¶¦º´¦¹µ¨º¹¦»¶¦·³§¹µ¦¸· »³£»³¨»°¦¸´¥´´§¹µ¨¸µ£¸µ©º²¤¶´¤·³¥»´£µµ£¸²¢¸²¤·´¥´±£·²¥¸«£¯®¢³³¤³µ¥¶²¦¶³£µ²©´± µ³¢·±¦·³£µ¯¥¶³¥¸³¤¶³§¶´£·²¥·µ¤º¶§·¶§µ³§µµ¥¶´¨³³§º´¨¹µ¥·³¨»³¥·³¥³²¦··¦¹µ¤·³¦»µ¥··¤³¶§¹¶¥··¥¸³§»³§¹·¨º´¥¹¶¨··¨¹µ¦·¶©º¸¨º¶©¸³¤¸º¬µµ¬»¹©º´©»¶§¼·«½·©¼µ¨»¶¨¹·¦º¸ª··ª¹·§¾·ª¼·¥»·©»º¨»µ«¼·¬¹·§¹¶­»µ¬¼¹¨¾¸©º»«ºµ¬¾·©¼´¦»¸¬»º©¼º¬¼»ªÀº¬½¹«½ºª¼¸©¼¸§Àº¬¾¹ª¾·¬½¸©Àº«¾»¯¼º¬¼»­½½¬À¼ªÀ¹¬½º°¿»®¾½®¼¹ª½¼°Á½¯À¿¬À¼°½¾¬À¾®¿½°Á¾®¿À¯Á¾°Á¼±¿¹«Á¼±¾¿­¿¾®¾¾­¿¾®¿¼¬À½­ÀÁ«Á¾¬Á»°Â»«¾½®Å¿°¿»­Ã¾®¾»®¾½®ÂÀ­Á¾«¾¿°Ã¼®Â»¬¿½«Á¾¬Â¾¬ÁÁ¯Â¿®ÂÀ²Á¿°ÁÂ²Ã¿¯ÀÁ³ÅÁ¯ÂÀ®ÃÁ±Ã¿¯ÃÃ³ÅÁ´ÂÁ³Å¼¬Á¿®ÅÁ³ÄÁ³ÃÂ³Æ¿­ÃÂ³ÃÀ±ÈÁ°ÂÀ³ÅÁ²ÃÁµÄÃ°ÂÁ°ÀÃ³ÆÀ¯ÂÀ¯ÅÁ±ÂÁ³ÄÅ¯ÁÀ³ÁÃµÈÃ³ÆÂ³ÄÃ´ÂÃ´ÄÂµÆÁ³ÆÃ¶ÅÀ³ÁÁ®Ã¿³ÃÁ³ÃÂ±ÂÃ´ÅÁ³ÆÃ³ÃÂµÇÂ²ÆÀ±ÂÀ±ÁÂªÂ¿®ÃÁ±ÄÄ°ÄÃ¬ÆÁ°ÁÀ¯Á½­Á¾ª¾¹­»½¨´³¬urfu_{fzil~g{i|diibz_n`~xdlrrnwof~q_~o]{nYxl]wq_tnWxl_wbUwq`wzkoqzorlooquwtn|lt_zobzxbf|lq~{d{k_w_Uq_QoiOtkUrl]xu`zgwutwztkkklkounuuqtrtu¡z¶£½¥À®¿­Ð·Û¡½â¨¾é¬Äë³ÊïºÌ÷»ÐúÄÓúÉÚúÊÛúËÛúÐßúÐàúÐäúÐäúÓæúÙçúÖæúÕçúÔâúÕäúØâúÕäúØåú×ãúÖåú×ãúÓàúÐÛúÌÛúÃÕúÂÔúÃÓõ½Ðñ¾Îò¼Ìï»Ëí¹ÇôÃÈô¿Êñ¾ÌòÀÉñ¼Éò´Åé³Áß°¿Ù©ºÐ³È®º¨¬¢§~¡wnolkkb`_{`zf~xi~oiqonk|ixizg~t`zq[{q]wo_uiYoiSnf[of[nfUki_kd[qb[noYqiWkg[lkSl_SrbQn_Ql`SndOngUlgYloSof[lbOndQkfUnfSliWniSki_robwub|t_xok{obr_|xd{td{o]wiUrg[unbzr_x|o~ ¬¤©¸¯·Ã¯Á¾³ÁÆ¶ÃÆ»ÇÉ»ÉÈ»ÈË¹ÈÇ¶ÈÌºËÊ¹ÈÊ¸ÊË·ÊÌ·ÈÊ¹ËÌ·ÊÌºÊÊ¹ÈÊ»ÈÊ¹ÊÈ·ÇÊ»ÉÊ»ÌÅ·ÊÊºÊÇºÉÈ·ÈÈ¾ÉÊºÌÊ»ÈÈ»ÉÈ·ËÇ·ÆÉºÉÌ¸ÊÇ·ÇÈ·ÆÇ·ÈÈ¸ÊÈ·ÊÆ»ÈÆ¹ÇÇ·ÉÄ³ÇÇ¸ÊÆ·ÇÅ¶ËÆ·ÉÆµÅÆµÇÆ´ÇÆ¹ÆÇ·ÊÇºÅÈ·ÊÈµÉÆºÅÇµÈÇ¶ÆÅ·ÆÄµÅÄ¸ÅÃ·ÌÇ¹ÆÅµÃÃ¶ÆÈ¹ÈÅ·ÆÆ¸ÈÅ¶ÆÆ·ÆÃ·ÆÆ´ÅÃ·ÆÅ´ÈÄ·ÆÂ¶ÅÆ³ÄÁ·ÄÁ¶ÇÃ³ÆÃ¸ÈÂ³ÂÆ¶ÆÃ´ÅÁ²ÂÆ´ÇÂ³ÅÀ´ÂÄ³ÄÂµÆÄ³ÂÁ³ÆÁ´ÄÅ¶Ä¿³Ã¾´ÃÃ´ÃÁ°ÃÃ³Æ¾´ÁÁ´ÆÃ´ÄÄ¶ÃÄ³ÆÁ´ÆÂ°Ã¿³Â¿°ÀÁ°À¾²Å¿µÂÁ±Æ¿±À¾±Ã¼²Á¾²À¿±À»®Â½®¾¿±Á½±À»³Á¿±Á¼°¿¾³¿»¯¿¾¯Á¼°¿¼±¿¾¬Á½®¾¾°½¾±À¼¯Ä¾³¿½°½¿®Á¿¯Â»°¾¾±À½³¿Á´¿»²À¼³À¾®ÀÁ°¿»²Á¾±Á¿®Á¾°À½±½¾°¾¾¯Â¿²¾¾±À¹¬¿Á²ÁÀ­¿½¯¾½®¾¿­¼¼­¿»¬Á»­¾½­¾»¯»¹¬¼»­½¼±¿º¬º¾³»¹¯¼º°»¾²¾º®À¹¯»º«¾»°¾º®¹º«·¾¯¼»¯º»ª¾¾«»»±»»¬¾»ª¾»®»¸¬»½¯¼»­¼¸¬¹º¬¼º­»µª»¸®¼¹­¾¹¬»¼®»¹®½»«¼¸­»·ª»·©¸¸ª¸·¬»µªº·¬··©¸¶¬º·ª¹¸©¼¹©»·¬¸·­··¬º¹¬º¹¦¼¶ª¹µ¬º·¬¹¶¨»¹¬º©¬¬´®³±´¬¢µ®³¯ ³±´®¶°²­µ¬´¯¢¶°³®·±¡´±µ®´¬´°¡¶«³²´®³­£¶±¹±µ¯ ¶³´³¢¸²µ®·³¸°¢¸²³±¡¶² ·°¡µ²¢·®µ° µ³·¬¢´¯ µ°¢·°¶³¡·°¸°¤´±¢¸±·µ¸²¸¬¡·²¹µ£¸´¤º²¡¸²¡»³º²£¹´¤·± ·³µ³¡»³¤¸² ·²¥¹³¥»·¢»°£»µ¥»²£º¶¥»²£»³¥»´¥¾³§½·£ºµ¥»³¥½µ¦¼´»¶¡½µ£½µ§»µ£¾¶§»µ£¼¶©¾·©¼·¦»¶£½¹¥»¸£¾¶¨½´©»»¦»·¦»¹¨¾·¦¾¸¦»»ª¾¹¨¿º¦½·¨½µ¦¾¹¦½·©½¸§½·¨½º¦¿»§¾·¦À·§»¸§¿·¥¼¹©¿·©¾·§À»¦Àº¦Ã·ªÀ»¬¾º«Â·«Àº«Ä·§¿»¥½¹¤¾·§Á¹§¾»¦¾¸«À·©¾º¨À»¨¾½©À¹¦¼ºªÀ»©ÀºªÁºªÁ¸§Â»¬Ã»§Â·®Áº¥À¼ªÂ¼«Â»ªÂ¾©À»­Ã¼ªÁ·¦Áº¨Á»¬Ã¼®Á»®Ã½¬Ã¾«Á¾©Á»­Á½ªÀ½¬Á¾«Å»®À¾«Ã¼¬Å»©Ã»­Ã»¬ÂÀªÂ»¬Á»¬Â¼«Æ¿®Ä¼©Á¼ªÄ»¨Á¾®Å½­Á¾«Ã»©ÃÁ¬Ä½¬Ã¾«Á¾¯Å½­Â½¬Á¼¬Æ¾­Ã¾¨Á¼¥¿¸§¾»ªÂ»«À½ªÂ½ªÁ½¬¾»¦¾¶¥½·¤·µ¥¸³®¡£rx]rSoY~tWx]~`x`{Y_|b~`x_qQnU|t_lkinbz`tSxkQw`QrbOwdUttUxbOqbOqgQwiSz~b|b~lf|i{g~gglikfdw[nWzdQzqQ{q`|bf|u]z`QqWIrYKr`Do`IngQrqY|zYzdd|i|dd``x][biilolllifnl§t±~¥º®¾®È´Ð»Ù¾à¨Áê¬Ìè±ÉìºÏø¾ÕúÁÛúÆÛúÊÝúÐßúÏâúÒäúÓâúÓãúÙèúÛæúÛèúÝéúÛéúÔæúÕäúÕèúØåúÕäúÔçúÕáúÔäúÐàúÌÝúÇÜúÄÛúÄÕú¾Óö¾Òú»Ï÷ºÎöºÎð¸Ìï¸Ìë¹ËíºÇì³Æë·Èë·Æê³Äê¬Ãæ«ÁÜ¬»ÓµÆ¬½¨º¤§zllfddbdb[|]_d~gknolb|[oUrU{iOwlKugQtfKrfMqbKnYKo]In]Fl]Mo[IkWIi[OnYKi_Kk[Kn`Kk`MkWFk]Mk`KlbMn`IlWDlWFgYDnYInUFnUIn]FkdOndWqgYunQuo]zt_{]~u_~q_wt[ziSx_MqbKqdQufQwk[{|o¦£·®»«»º«¾½­ÁÀ°ÅÂµÆÇµÅÄ²ÈÁ³ÈÂ²ÈÅµÉÈ³ÉÅµÆÅ³ÊÄ³ÈÆ´ÈÆ·ÉÇµÊÅ·ÊÆ²ËÁ²ÊÆ³ÄÀ¯ÅÁ³ÉÂ²ÇÃ±ÅÅ²ÊÇ·ÈÃ²ÅÄ·ÇÂ±ÄÈ´ÆÂ¶ÇÅ²ÅÃ³ÆÁ°ÈÆ°ÉÁ²ÆÄ²Ç¾´ÆÂ±ÅÃ°ÈÁ±ÆÅ´ÈÃ³ÈÃ²ÆÁ²ÆÆ²ÆÀ°ÈÃ¯ÆÃ²ÄÃ¯ÇÃ²ÆÃ®ÇÃ±ÅÃ²ÇÃ®ÅÁ­ÆÀ¯Ã¾®ÄÁ±ÈÂ°ÃÀ°ÄÃ²ÆÁ±ÃÂ¯Å½®ÆÁ²ÄÁ°Ä¿²ÃÀ±ÅÀ²ÅÀ®Ã¾¯Ä¾¬ÂÁ¯ÆÀ´Æ¿®Ã¾­Ã½­ÃÁ¯Å»®Æ½­ÀÁ®Ã¿®Á½®Ä¾¬Á¿­ÃÀ°Â¿®¿¾¬Â¾°Ã¼®Ä¾­Á»¬Á½®Â¾­Á¾®Á»¬Á¾¯Á¿­Á»®ÁÀ®Ã½­Â¿¬Â¿¬Ä½®Á½­Á»°¾»¬¿½®Á¾©À½­Áº«Ã¿¬À»­¿ºª¿º«¾¾ª¿·©¾¸¬¿½©½·¬Á»­À·¨¿»©¿·©¾º¬¼¸ª¾»©¾»«¼ºª¾¼«¿»¬À¸ª¾»­¿¹©½¹ª¾¸¬¿¹«¾ºª¾»­½»©À·¬¾»¬½½­¾ºª¼º®¾¸­Á¸«½»«»º¬¾¸ª¿¸­»·§¿»«»·¨¼»¬»¶«À¹«½¶­¾º§¼º«¾º©¾µ¨½¶«¾³«»¸«»ºª»·©»¶§»·©¿·¬¾¹©¼¹¬¾¸¨¼·©½¹§»µª½¸§¾·©»´©»³¥»·¦¼¹§»·«»·§»º§¸µ¦½·¤»·©»¶¨¼¶ª»¶§¸³¥»·©¹³¨º³§»¶§º·¦»¶§¹µ£¸µ¤º¯¦ºµ¤»¶¦·²¡¶³¦·³¥·´¥¶±¤º²©»µ£¶´¥¸¯¤¹²§¹µ¥º±£·µ¢³³¦º³ µ°¡·µ¤µ±¤·­¥°³¦´³¢³µ¢·³£·³¢·¶¢¶³¥·µ¶³£¶³¥¹±¡µ³¤·´¡µ´¦µµ¦··¤·´¤·³¦¸´¢º±¥´´¨··¦·´¨´¶£·³¤··¥¶´¥µ¸¤··¦·²¦¹¸¢·µ¥¸·©¹·¦·¶©¹¶¥·¶§·¶ º²¦¹´¤»³£µº§¹´¥¹¸¥¸¶ª¹¶¦¸µ§º¶¥ºµ§º·§¸µ¢»´¨¸¶¨º¹©»·¥µ´¦¼µ¦º·¦¼µ¤¸¹©»·£»µ¥º¶¨»·¦º¾¨¹¶§»¸¨»¶«¹·¨¿¹ªº·§¹¸¬½·ª»»ª¼»ª»º¦½ºª¼»©½º§¹¸©½º¬¾¸¬¾¹ª½»¬¼»®¿»¬¾»¬º¾¬À»¬Á¹©»»©½¹ªÀ¼©¿º¯½·ª¾¾«½º¬¾¼®Â½®¼¾«À¼¬À½­¾¾­¾¾¯À½¬Á¿¬¾¾®À½©¿¾­ÀÀ³Á»¬À»¬¾¾¬Á½¬¿»¬¿½°Á»¯ÁÀ­À¾ªÁ¾¬ÁÀ°ÁÁ¬¾½±Á»«¼Á¬Ã½­Á»¬¿À®Á»¬ÁÀ®Á½®¾¾¬¾¼¬Ä¾°Â¿«Á½¬ÀÁªÄÁ°Ä½®ÂÁ®ÃÃ®Â¿«ÃÁ®ÁÁ®Æ¾²ÁÁ¬ÅÁ¯Æ¿­Ã¿¯ÃÁ³ÂÁ¯ÁÁ¯ÀÀ®Ã¿°ÅÁ¯ÁÃ²Ã¿±ÆÁ²ÃÃ°ÄÂ¯ÃÀ±ÃÂ²ÁÃ±ÃÀ²Æ¿¯ÂÃ²ÃÂ°ÃÂ°Æ¿²ÆÁ¯ÃÃ±ÂÁ²ÃÂ®ÃÃ³ÄÃ°ÆÁ®ÅÃ²ÂÃ®ÁÀ³ÂÃ®ÆÃ´ÆÂ´ÅÃ±ÃÁ¬ÄÆ³ÃÁ³ÃÂ²ÆÁ®ÃÁ¯ÄÃ°ÂÁ®ÃÃ³ÃÁ­ÁÃ³ÆÂ°ÂÂ°ÃÃ³Á¼²Á»§¿¼§»¹¥·³©¯¬¦ku`xf]~ki~igfnlg{`u`{dgrrlrlix`{qWzn]uoYtq_tt]uiUrkSxn]wudl~nnloknqullnk~w[uYzx]{do{i_~n]ufStbMoiUriQqq]uz_zfgnnnklgiilqq{x¤zuutq u¯¢¸¦¿¬Æ²Í¸àºè§Àì¬Æõ³Íö·Ñó»Óú¼ÔúÇÛúÌáúÒäúØæúØéúÞêúÝíúÜìúàíúàëúâïúãìúçìúâîúáíúáíúàìúáìúàêúÜéúßéúÝìú×êúÖèúÕäúÏáúËÝúÊÛúÆÖúÄÖ÷ÈÐúÃÓúÃÓúÃÐùÀÎú¾Óú»Ìö¼Ëó¼Îö½Ìö»Èö»Êë¶Ãê®ÀÜ¥ºÓ³Å­Â«»¤³~£{uruninnigfktxz~wlf`z`~uYxr]{o]uqYtoUonSriQndWigUqfQlgUk`QkdSlbOo_SifQkbSlbUniUnnWnlSqoSokYndQlbSqfOl`Ul[SrfMnlSon[uw`{w`|xf{zgg|l~d{i{o`{nYwlWro]zlYwr`twt¦¥­¤§½³»Ã¬»Á±ÁÁ±ÃÇ³ÃÊ·ÅÊ¶ÉÆµÅÉ»ÉËºÊÉ¶ÌÍ»ÈÊ·ËÊ¸ÊË»ÈÆ¸ÊÉ¹ÈÌºÈÇ·ÌÊ¹ÈÊ¶ÈÅ°ÃÅ·ËÊ·ÇÊ¹ÊÈ¸ÊÊ·ÈÈ¶ÆÈ·ÈÊ·ËÊºÈÈºÈË¶ÇÈ¹ÈÇ·ÊÈ³ÆÇ·ÉÇµÈÅµÉÆ¹ÇÇµÉÈ·ÈÈ·ÇÇ·ÈÇ·ÇÈ¶ÉÊ¶ÈÆ·ÅÊ·ÇÇ¹ÆÇ·ÈÆ¶ÇÊ¶ÈÄºÈÆ¹ÉÆ³ÅÅ¶ÃÉ¶ÈÇ·ÄÃ¶ÉÇ¶ÄÆ³ÇÆ·ÅÆ²ÈÆ³ÃÆ¸ÈÆ·ÅÈ·ÇÃ¶ÆÅ³ÅÃµÁÅ³ÊÃ¶ÆÁ³ÆÄ³ÆÃ¶ÃÂ¶ÃÃ³ÆÂ³ÂÁ²ÂÃ²ÈÆ³ÆÄµÂÅ°ÃÂ´ÆÃµÆÃ²ÅÄµÃÃ³ÃÅ´ÆÅ³ÂÁ²ÆÃ³ÃÃ´ÃÃ³ÅÃ²ÃÄµÄÂ¶ÃÅ±ÂÁ°ÃÀ³ÂÀ´ÀÁ³ÄÁ³ÅÅ¯ÄÃ¯Â¾²Á¿®Â¿°ÀÁ³ÃÁ¯ÁÁ°Á¿®ÁÀ±¿Á°ÁÀ­Ä¾®ÁÁ¯ÁÂ®À¾°ÀÂ¬Á¾°Â¿±ÁÁ­Â¿­¿¾­À¾±¿¾²¾¾­Á¿²ÀÀ°¿¿±¿Á®¿¿°Â»®Â¾®¾¾²º¿¬Ã¾«À½°Á¿°ÁÀ®Á¾±¿¾°¾Á¯¾À¯Â¾±À½¯½½±À½±À¾³Â»¬ÂÀ¯¿»¯¿¼¬¼»­¾½¯Á½¬À¾¬¿½²ÀÀ­¾¾­Á¾®¿¼¯¾¾¬½¾®¿»¬¼º®½¿ª¿»°½¾¬¾»¬¼¼¬¿½¯¼¾®½¼®½À¯¿½¯½»¬¾¾¬º»¬¾½¯¾¾¬»»­½½®¼º°»º­»»¬»½­»»«¼¹­¼º©º»¬º¼¬½¹ª¼»ªºº¬½»¯¹¸«¼¹¬»»¬¸»©»»¬»¹©¹»¨º»­¹·¨¹·¨¹¾¬¶³ª¼·ª·º©¸¸©»¹«ºº©·µ©º·¬»·«¹´§¹·¨·»¨·¸©··ª¹§¬« ´®´¬ ²¬³¬³¯¶° µ® ¸®´¬³±²±³®·° ¶­·¬µ¯¡´¯·¯µ¬¢µ®·­¶´·°¤¶²µ±¶¯·±µ®µ¯µ±¡¶°·²¢¸¯¢¶²¡·­¡º³£·³·³¡¸°¡µ¯ µ²º°·¯£¹±¢·° ·±¦¸²£»°£·²¸¯·² º±¤¸²·³£»±¡¸¯¢¸³¢¶² »³¢¸±©»µ£¹²¢¸²£¹³¡¸³£¸·¥¸³¥»²¢»µ§»·¤»³¥º´¥»µ¥¹¶¦»·£¼´§½·¤¿³£½´©¼´£º·§»´§¾·¦¾¶¦»³£º¸§½³¦¾¸¦¾·¥º·¥»µ¨½¸¥½·§»·§¾¸«¾¸¤»·¤¾·«¾¹©»¸¤»»ª¾º§Á·©¼¸«»µª¾¸§½¸¨¿¸§¾¹©Á¸ªÀ·§»¹¨»¸¬Á¸£Áº¨¿¸ª½¸§Á¼§¿»ªÀº«À¸©¾»¨¿»ªÁ»§¾¹ª¾¸ªÀ¸¥À·ªÂ»§Á¹¦¿¼§Á¼©¾¹«Á»«À¸¥¿º«¿»©Á½¨¾º§Á¸§Á»¬½¼«À»¬Ã¾¬Ã¼ªÃ½¬Á»¬Á»©Ã»«Á¾«À¾¬Ä½¬À»ªÀ½¬Ä¾«Á»¬Ä»¬Á¾©Á¾¬Á»¬Å»¬ÃÀ­Á½«Ã»±Ã¿¬Äº­Ä¾¬À¾ªÆÀ­Ä»¬Ä½«Ç¾±Æ¾¬Ã½­Ã½¬Æ½©Á»«ÃÃ¬Ã½¯Æ½¬ÁºªÁÁ®Æ¾«Ã¾°Ã¼­ÃÁªÂ¼¬Ä½­Ã¾ªÁ»¨¿¾¬¾½ªÃº¨À½¨Á¾¨¾¼§½²¤»¶¢»´£¹³®§©gqYnYtU|tbnixidgg]u[lWnY]|dfi|g`w`w`lWzfQzlQt`OqgKudQt_OtgMtlSwl]q`t_g|d{_~fugif|g|bt`tW|nS|nY|qU{`d{dkUu_ItQKqdMqfMogS{oQurU|z`diki`|b_dfkttrt¡wt¡t¡r¨u£²~¥¾~¨¿²Ç·Õ½ã¡Ãë«ÈõµÎúºÐú·Öô»×ùÆÜúÇÞúÑâúÛåúØìúÜìúßíúâîúäîúàñúàðúÞïúâíúâíúßìúàìúßëúÝîúÝéúÛîúÝëúßêúßèúÜìúÛèúÕçúÓäúÒáúÌáúÉÝúÆÙúÃÕúÃ×úÁÔúÂÒúÁÓú¿ÔúÁÎø¿Òù»Ðó¼ÈóºÍô¼ÊðµÆé®Âæ«¾ß·Î³Ì±Ã«º§·ªutrondgd`]|gdbglwrrf_x_tUnOxkUwgUufInfIn]Fk_In]Mo]Io]Fl_IlWIn[Ii]DiUIk[Fk`MqdQi`Ml[MrYOk[Mk[KkbOo`Mo]KnbOn`QqdMl`Mul]{{]~z]|w_tb|z`~tYo_~w[woQxdQufQtfStiUxq_zwn¤£¬ ¯µ¦¸»§»»«¾Æ²ÄÃ¯ÆÃ²ÄÁ°ÅÁ²ÇÆµÈÃ²ÈÄ´ÆÆ°ÈÆ²ÇÄ³ÊÄµÈÄ´ÇÄµÆÆµÈÃ²ÈÂ³ÄÀ¬ÄÃ´ÈÃ·ÈÄµÆÁ·ÇÃ´ÈÆ²ÈÅ¯ÆÁ¯ÅÄ±ÆÄ²ÇÃ´ÈÅ³ÆÁ´ÅÂ³ÈÂ³ÄÄ¯ÆÁ²ÇÁ°ÈÁ±ÄÃ²ÆÃ²ÇÃ³ÇÁ°ÆÁ¯ÆÃ²ÄÃ°ÇÁ´ÄÃ²ÅÆ°ÈÃµÈÁ¯ÅÄ¯ÈÁ²ÈÀ²ÆÂ²ÅÁ²ÅÃ®ÄÀ®ÅÃ°ÈÁ¯ÄÁ²ÅÁ°ÅÁ°ÄÂ²ÅÃ³ÄÁ­Á¿¯ÁÁ¯ÈÁ®Ã¿°ÇÁ²Ã¿¯Ä¾®ÆÀ±Å¿°ÃÀ©Å¾®Â¿¯ÃÀ¯Æ¼°Â¿°ÆÁ¯Ã½²Ã½°ÇÂ¬ÃÀ¯Á¼®ÂÁ¯ÃÁ²Â¾¯Ä½°Ã¿²Á½®Á½®ÃÁ¬Ä¿®ÁÁ­Ã»¬Á½±Á¾­Ã»­À¾³Â¼±Á¾­Ã»¯Â»­Â¼¬À¼¬Á»­Á»«Á»¬Á»­¿»«À»¬À»­Á¹«¿»«¿¸®¿¸§Á»ª½½­Á·¨¼º«¼¸§¾¸«¾¸¬¿»¨»»§À»¬Á¹®¾¹¬À»¬¾¼«Á¹¬¾»¬À¸«½º«¾¸¬¾¼¨½·­½»ª¾½«½·ªÀ¸«¾»ª½»¬Â»©¿¸©»·¯¾º«Á½­¾»®¾»®¾·©»¸«¾·ªÀ¸«»·ª½¸©¾¸«¼º¨¾µ¬»·©»µ¥¾³¬½¶«»¸¨»¹¨¹¸«½º¦»µ«»·©¼µª»¶ªº¸¨»³©º¹ª½·©¾·§»µ¨»´§º¹ª¾³¥»·¦½·§»¶ª»·§ºµ¨»³¥º³¨¼µ¡»¹«·µ§»¶§¼µ¦»´¥··ª»¶§»´¥»²¦»µ¦¼¯§¸³¥»³¥·°¥¸²¥·²¥º³£¶³ »´¤¹³£·±§¸¯£¶³¢¸´§º°£·µ¥¹°¨º´£·³£·¶¦»ª ­´¥¶³¢´¯¤··£·³¤´¶¤·´¤µ³¥¸µ¤³´¢²²¢²µ¡¶³¦··¥·±¥·³¤··¤¸¸¦·¹¥¶µ£¶·£·³©·¶¤ºµ¦µ·¤·¶¥º´¤¹´§¶´¤·´¦·¶¦·´¶·¦·´¦··¥¹®©¹µ¥¼³£¸µ¥ºµ¦¶µ¥··¤¹¶¥¸¶¥¹¹§¸´¥¼·¥º·¥¶¹¥·º¥¹·¨¸·¤»º¨½¸£»¹§»»¨»¶ª»¸¥¸¹¦»·ª»·¨»¹§·¶¥»ºª½·§¹º©º¶§º¸ª¿½¨º·¬»¼ª¼¹ª½¹¨¼»¬¼º¨¾¼§»º¬¼»«¼º¬¼¶¬º»«»»¬¾»ª¼ºª¾»¬½ºª¼»«»¹¨¼½«¾¼¬¾»§»¾­¾º¨¾¿¬¿»¬¾¾°¾¾¬»½©À»¬À¼ªÀÀ©¿¾±Á¿¬¼¼­½¾­Á¾¯Á¾­¿»¬Â¾­¿¿¯Á¾®¾¾¬¾¾®¾¾­¾»¬¾¼­À¾±Á¿­ÃÀ¬¾¾±Â¾®ÁÁ°Á¼¬Á¿®Á¾­¿¾°¾¾­Â½¬ÀÁ¬ÃÀ°Á¿¬Á¿­Á¿¯¿Á®ÄÂ¯¿À­ÁÂ°Â¿­Ã¿¬ÀÁ¬ÆÁ¬ÃÁ²ÂÁ¯ÃÁ®ÄÂ¯Ã¿°ÂÁ²Ä¾¬ÃÁ¯ÃÃ¯ÀÁ±ÁÃ±ÄÃ³ÂÁ¯ÃÃ±ÃÁ°ÅÂ³ÅÁ®ÃÁ¯ÆÂ°ÄÁ¯ÆÃ³ÃÅ³Ã¾¬ÁÃ¯ÃÁ¯ÆÁ°ÄÂ³ÃÄ´ÃÂ®ÅÁ³ÅÅ¬ÆÃ¯ÇÄ³ÃÃ°ÄÃ®ÁÃ´ÃÀ®ÅÃ³ÁÀ®ÃÃ³ÃÆ­ÄÃ³ÅÄ®ÅÃµÆÅ³ÂÅ±ÆÃ²ÄÂµÃÁ­ÃÁ¯ÃÁ°ÃÂ¬ÂÁ­¿Á¯¾º©¼·¦»»¦ºº¨º½©·µ ¬¦¡wdu]z_z_~noqknoli_|{dilookkok~fr]{nUwqWuiQqlUnkUqnWzu`wt`xzgbk~l|kilqnok{fzb|w`zzW~dzdgi{`{l[tkWqgQunSunUwu`{~`{bnnlnrinnoru¡|{§§~³~¬¬¦»¨È¯Ê²Ì¶Ò¡»è£Ãï¬Êó¹Î÷¾ÔúÀÙúÇÛúÌàúÐãúÒéúÙìúàíúæïúêñúìñúëôúïõúðöúìöúïõúçñúèñúæñúçòúåðúéñúåñúäíúäïúçïúèïúãðúãñúãëúáìúßëúÝêúÕæúÑáúÐÞúÐÛúÌÛúÊÖúÇÖúÆ×úÃÕúÅÓúÃÖúÃÕø¾Íö¾ÐóÀÌô¶Èï¶Èç³Âç¨ÀÚ¡¸×³Ò°Å®Ã¦· ²§~¡uuuttninifqoq~|wlldw[z]|wW{oUuqYrl[ulQokSrfSniQkkQnfQlfSkdSnfSkiQofQl`YkgQkbUldQidSnfSid[liWkkYno]rqQor]uo[wukzli|~l|dzzftf~{d{g{x`r[{rYtk]uu_tz_|xg~¨¨­¥±À¬»Á°¼ÈµÇÉ¶ÈÉµÅÆ¶ÊÈ¶ÇÈ¸ÈÇºÆÈ·ÊË¸ÊÈ¶ÉÇ¶ÉÌ·ÊÈ»ÆÊ·ÊÉ·ÉÆ³ÇÌµÉÈ´ÆÈ¶ÇÆ¸ÆÌµÇÈ»ÈÊ¸ÇÊµÇÈ·ÈÆ¶ÈÉ´ÈÈ·ÊÈ·ÊÈ¹ËÇ·ÉÈ³ÈÉµÈÊ¶ÆÈ¶ÌÈµÆÉ·ÈÇ·ÊÈµÇÆ·ÈÆµÇÊ·ÇÈµÇÅ´ÇÈ¹ÉÊ³ÆÈ·ÈÈ·ÈÈ±ÆÊ³ÇÆ·ËÇ·ÃÄ¸ÈÈ¶ÈÆ³ÅÆ¶ÅÆ»ÆÇ³ÃÃ·ÅÆ±ÆÆ³ÆÅ·ÊÇ´ÄÃ¶ÄÇµÈÆ¶ÅÃ¶ÆÆ±ÆÅ´ÆÃ³ÈÄ³ÇÃ³ÆÄ³ÅÇ´ÅÁ²ÃÅ³ÅÄ³ÅÄ²ÅÃ³ÇÁ³ÁÆ³ÃÃµÇÂ²ÅÄ³ÄÀ³ÃÃ³ÂÂ¸ÅÄ²ÄÃ´ÃÄµÄÃµÃÄ³ÄÅ²ÅÁ³ÂÁ²ÇÁ³ÀÄ´ÃÄ³ÅÂ®ÁÁ´Â¿³ÄÀ¯ÂÃ³ÂÁ³ÂÅ±ÂÃ°ÂÁ³ÃÁ®ÃÁ³¿¿°ÅÀ®Â½²ÀÁ°Á¿¯ÀÀ­Á½µ¿¾­Á¿°½¿¯À½±¿»±Â¾®À¾¬¼Ã¯Â¾¯¿¾¯ÂÁ°Á½¯ÀÀ°¿¾°À¿®À¿³¾¾®ÁÀ®ÁÂ®Â¼°¿¾°¾½±Á¿¬¿¾®½¾®¿Á°¿½¯Á¿¯Á½¬À¾­½¿±¿Á¯Á¿®ÁÀ¯¿¾¯ÁÀ²Á¾¯¾»­À¾®¾¼¬ÀÀ®ÁÁ¯¿¼¬¼¾²Á»«¾¾«¾¼¯À»¬¾½°¾¼¯¾»«À½¬ºÁ¯Á½¬½º¬º»¯½¾®¹»­º¼¬»»ªº½¬¾»ª½¼¬»½®¼»¬»½¬¾·©¹¹ª¹»­»¾¬¼¼¬¹¸®¼»ª»»°¼·¬¹¸©¼¼°¼·­»¾­»·«»¹¬»·«»¶¬·¹§¹º¬»¸«··¨½·­»·¬¹»ª»º©»·¨º·¨º»¬¹¶«·¹¬·¶§º¹«»·¨¸·­¹¸©º»¨·¹¬¹ª±«°¬²® ¸¬ ³©¶° ·¯·«´®´®¡³®²®¡´­³¬´°·¬µ¯³®³¯ µ±³¯ ·±µ°³°¡´¯ ¸¯¡·¯´­¶­ ¸®¤µ±¶° ·°·®µ¯¸°¢¶­¸­¡·¯·²¡·´¢·¬¡¸­¤·² ¹¯£µ®¡·° »³µ°¡¸°»°º¯¢¹· ¸³·±£½¶¦º±¡º°¢¹³¥·¯¡·¯ »°¡º°¤»³ª¸²¥·³£·³§·²¤¼±¦º´¦ºµ£»³¥»´¤º³¤¼¶¦·µ¥½´£¸³¥½·¥¸µ¥¾³§»¶¦½¶¤¾µ£¼·£»³¥»´ª¾·§»²¡¾±§½·¦¿´©¾µ¤»³¥º¸¦»·©¿¸§¾·¬¿¸©»¸ª¾·¨½¸¨¾¸ª¾·©¿¸©½·ªÁ»¨¼·¥¾¸¨¾¹©À¹«Á»¯¿º¨¾¹¬¿·¨Á¹§Â»©¾¸¨¿¸«Á»©¾·­À¹ª»¸©¾º¬¿¸©¾¸«¾»«À¸ª¾»ª¾¸«Àº¦½»«Ãº§¾·ª¾»¬¿»«Ã¹­¾º«¾º«Â»«Á¸«Á»¬Ãº«Á»®Á½«Á¹­Ä»¯Å»©Á½ªÁ»¬Â»ªÁ¹¬Ã»«Â¾©Á¾®Âº«Ã¾¬Á½®Á¼®Ã»ªÁ½¬Ã»®Ä½¬Ã¾¬Ä¾­Ã½±Ã»­Ã¼®Á½«Â¿¬Ä½®Å¾­Ä¿¯¿¾®Å¾®ÆÁ°Â»«Ã»¬Ã¼¬ÃÁ®Ä¼«Ä»«Á½¬Ã¼°Ã¾°Á¾¬ÊÂ°Å¾ªÄ½¬Â¼¬Á¼¬Ã»¬Â¼©¿»©¿»¦¾¶¤¿´¥»º¦½¶§º·¦µ¦¢z`lWlY|qWw`br_u`figbt`wSt]wb|gggxfz_o`|g~~]~dUx_Qr_Io_Kn]Qo]OndSriUtnY{t[|xbigdtbub{kgl~_wY{rS|kW|g[xuUub~b[qYwdMw_KodMq`MxdMwtY{u`fil|i|lbklrotow¦~«|¬z¢³~¥®¥»®Å¯ÎµÎ¹Ú¾æ©Ãö´Îò·Òö»Öú¾ÚúÈáúÎâúÔéúÝëúáìúàìúàðúæòúìôúêöúï÷úî÷úòùúôúúí÷úèõúèóúæóúæñúãñúäóúæñúáîúßîúäïúäðúäðúãîúßìúÝèúÝéúÜèúÒæúÎàúÌÝúÍßúÌÜúÊÛúÆÙúÇØúÆÕúÇØúÄÓúÁÓø¼Ïï¸Îò³ÌôµËê³Æß«ÂÖ§½ØºÓ¶Î³¿«»§¶¤²¬z£wlillqfk`{gz`|dfrtqtkd~]qY|l[qUwoOwiOt`Qq_Iq]Qn[Il`Mn]Kl]OnfIk_KlUInUBg[FkUFlYDkUMl[Ig[Mg[IfYInYFk[Oo_Un_MqiQrl`x{n~dr`~x]u`|r]~o`~w`|ubnY{iQtgWwgQugWtl`{r¡¢£ª² µ½¬º»²ÃÃ³ÄÆ³ÆÃ·ÈÂ¯Ç¿²ÆÁ²ÆÄ³ÇÃ³ÈÃ²ÇÁ²ÉÃ³ÇÃ¶ÆÄ±ÊÄµÈÂ²ÇÄ°ÈÃ´ÅÂ°ÈÂ²ÆÅ®ÈÂ±ÆÃ¶ÈÄ°ÆÁ±ÇÂµÆÄ²ÈÂ³ÅÃ´ÈÂ³ÅÈ´ÇÃ²ÉÁ¶ÆÃ®ÆÄ´ÆÀ²ÈÀ³ÆÁ³ÈÁ²ÊÅ³ÇÁ³ÈÁ²ÉÄ¯ÇÀ³ÅÂ³Å¾¯ÅÂ´ÇÃµÆÃ²ÆÃµÅÃ²ÊÄ°ÇÁ²Å¾®ÆÃ³ÈÁ³ÅÂ³Å¼®ÆÃ³ÇÀ²ÇÁ²ÄÄ²ÅÁ°ÆÃ³ÄÁ­ÃÃ³ÄÁ²Æ¿°ÃÀ²ÆÀ®ÂÁ²ÆÁ²ÃÁ²Ã¾°Ã¾­Ã¿®Å»®Æ¾¯Ã¾°Ã¾°Ç¾°Â¾³Á¾®Ä¾®Á¼®Ã¿¬ÃÀ¯ÃÀ°Ã¾­Ã½°Ã¼²Ã½²Ã¿«Á¼°ÁÁ°Ã»«Â»­Á¾­¿¾²Ä¿¯Á¸¯Â¼«Á¾®Áº®Ã»­Ã»¬½¼­À½©Ã¿¬Á»®À»¬À¼ªÀ»¯À¸©¿½¬¾½¬À»«¾¹®»·­¾¹«¾·¬½º«Á·¬Á¹«¿»«½»®Àº¬¾»«¾¸­¾·¬Á·©Á¹¬¿º«Á¹©¿º®¼¹ª¿·«¾º¬¾¼­¿·ª½º¬½·ª¼¸¨¾¸®¾·«¾º©¼·¬Á·¬¾½­¾·©¾¸«À·ª¼»ª¼·ª¾·ª¾·®½»©¼¶¬¾·­½¶©»µ®»¸¥»ºª¾·©¼·¥½·©¾¹¬½·ª»¹¬»¶«»¶§Á·ª»µ©»¸ªº·«»·§¾·ª»·¤»·ª¾µ§º·§»¶¨»³¥º·ª·´§¹³¨»µ©¸µ©ºµ¨»³§º¸ª»±«¹¶¥¹µ§¸³§½µ§ºµ§º³¦º±§·³¤¹³¤¶²¦¹¶§»³§¹¶£¸³£¸²§·³¦·´¥·±¢·µ¦·³¥·³¦¶³§·³¦¶²¥»³§·³¥·µ§»¬¡²µ§²³£´´¤³³¶·¢·µ¥³µ¢µ²£µ³¢µµ£´³¥´²§·µ¥µ³¥·³¥··¢¹´§·µ¡³±¦·´ ¶³¦¹´¡¸´¨º³¤³¶¥´µ§··¦´³¤·¶¨»·¦¹´¥·µ¥·µ§··¥·³¡µ·¥¹·£··¤¹³¤»·¥··«¹¶¥º¶¦··¢¸·¨·¶¥¹´¨º¶£¶´¨»´§º¶¨·¶¦»·§»¶¦¶·¬¼µ¤»¸¤¹¹§»¶¨¹¹¨¹·§»º§»·¦»¸©·¹ª»º¨¼»§»·§»¹«»»©¾º©»·ªÀ¹©»¸©½»¨º·§»»¨»»­¿»©¼º§¾¸§¾½¨»¹©¼º©»¼­¼¹¦À»¬º»©»¾¨¿»¬¼»¬¾»ªÀ»¬Â»«¿½¬¼À¬¾¾§¾º¬¼¾ªÁ½¬½¿¬¿»­¾½¯Â¾«¾»¬¿¾¬Á¼¬¾¼¬Á¼®ÀÂ­Á¿­À»­Á¾¯Ã¾°Á»¬Á¾¬Á¼¬¿¾²Â¿®ÀÁ®Â½®ÁÀ­Ã¿¯½½¯¾Á©ÂÀ¯Á¿®Á¾­ÃÂ¯ÁÀ²ÅÁ¯Á¾±ÃÀ­ÂÁ¬Å¾¯Ã¾¬Ã¿­ÁÀ­ÁÁ®ÃÀ®ÃÁ°ÁÀ°ÆÃ²Ã¾®ÃÂ®ÂÂ¯ÂÁ®ÃÁ­ÃÁ³Å¾¯Ã¾¯Ä¿³ÃÂ°À¿­ÄÁ³ÃÀ³ÆÃ³ÁÀ²ÁÁ±ÅÃ°Â¿±Æ½³ÃÂ­ÃÁ±ÄÂ¯ÁÁ±ÆÃ²ÅÁ°ÃÃ­ÅÅ´ÂÂ²ÆÂ¯ÃÃ±ÄÄ´ÈÁ­ÅÃ²ÃÃ³ÃÁ´ÄÁµÇÂ´ÄÅ¯ÄÃ®ÃÂ³ÆÃ±ÅÅ°ÃÃ±ÆÂ³ÇÂ±ÃÂ²ÂÃ¯ÃÀ¬ÅÂ±ÃÂ°ÂÂ¬½»«¼ºª½¿¬ºÁ¯¿»«·³¬n{bo_~w_xd~li{borwlizdwYfkooo~kzi{di|g~kWrlOxgSoqStdWrqYunWwtYzx]{|g~ikn~k{fdlinbx[{uY{r[~{b{zbkbzd~l[xnUxnUtoUukUwuWz{dllrnlqqttwxx£°ºµ¥¶ª»ªÃ°Î³Ó·Ø¼ä¦Ãð±Èô¹Îú¾Öú¿ÝúÆÝúÑæúÙéúáëúäðúéóúçñúéôúêöúòöúð÷úóúúùúúøúúøúúùúú÷úúóøúïøúî÷úíôúïôúëóúëóúèóúêñúêòúëñúëñúéñúáïúãêúàíúßèúÖèúÒãúÒàúÒßúÑÞúÌÜúÊÛúÊÛúÈØúÊ×úÈ×úÆ×ú½Óú¼Òú¼Ïú½ÏôµÈî°Æé©Ãã¨ÀØ£·Ì³Ã¯ÆªÁ«½¤»³§|ornuquqilnkotu|wtnig|[xwUwo[wrWxq[qoWndOqfSodQliWolUkgQnfQnbQldQg_OigOd]QibSlbQgfSifQlgQokSidUlfUnqdqq_wwq|lxf~wi|dd||gzk{brf{z[xn`uq]ro[wr`|i¨ ¬«¬¤­»­¸¾³¼Â¶ÃÇ»ÅË»ÇÈ¶ÆÉ³ÊÇµÄÈ·ÈÈ·ÉÈ¹ÆÊ·ÆÇµÈÊ¹ÇÈ·ËÇ¹ÆÆ·ÈÆ·ÊÊ»ÈÇ³ÇÅ·ÊÈ·ÉÉ¹ÇÈ·ÌÆ³ÈÊ·ÇÊ·ÊÊ³ÉÊ¸ÆÇ·ÈÈ¹ÉÉ·ÈÇ³ÈÄºÈÅ´ÆÇ¶ÇÄ²ÈÆ·ÇÇµÈÆµÈÇµÇÆ¶ÊÈ·ÈÈ´ÆÅ¶ÆÅ´ÇÊ´ÈÃ¶ÅÆ³ÈÅ´ÇÆºÆÆ¶ÆÈºÅÈ·ÆÆ·ÇÆ·ÈÆ´ÅÈ¶ÇÁ³ÇÇ³ÆÃµÇÈ·ÈÆ³ÆÅµÇÆµÆÅ³ÆÄ¸ÆÃµÇÂ´ÅÅµÆÃ¶ÅÆµÃÂ¶ÄÄµÆÅ´ÃÄ³ÅÄ²ÈÂµÃÂ¶ÇÃµÇÄ±ÅÅ³ÅÃ·ÇÃ±Á¾µÃÂ´ÇÁ³ÆÃµÆÅ³ÆÀ°ÁÅµÃÂ³ÂÂ²ÅÅ³ÂÀ±ÅÃ®ÂÂ²ÃÂ²ÁÁ³ÄÁ³ÁÃ³ÂÃ²ÁÃ±ÃÃ³ÂÁ²ÂÂ²ÃÀ²ÁÃ´ÂÀ°ÃÀ­ÀÁ°ÁÁ¯ÀÀ°Á¾²ÀÀ¯¾¾¬¾¾°Ã¼¯¿Á²Â¿®Ã¼¯Á¿¯¾À®¿¿®Á¼¬¿Á²À½°¿¼°Á¿¯ÂÀ±À½®ÀÀ¯À¿²À¿ª½À­¾¾²¿¼±¿¾³¾Á±ÁÁ®¿¼¯Á¼±Ã»³¾À¬À¾­¾»¯À¾¯¾½¯½¾°½¿®Á½³Á¼®¾½ª»¾­»½°¿½¬¾»¬»»¬¾¿¯¾»¯À½­½½±¿¿¯¾½®¼¹¬¾¿®»»­»»­¿¾¬½¼«¾¾®¿¼¬¾»­»¼±¾¿­»»­¼¹¬½¼¯»¼ª»¼­¿º©¹¹­¼¼¬»·©»·¬¹»¬¹º­»»¬º¹­»»®¼¹­¸º¨¹·¬»»¬º¸¬»º¨»·©¸¸¬»¸¬¸»ª·º­½·®º»¬¹»ªº»«½¹¬º»¨º·§º·©»»¨ºº«¸¶¬¸·¬·¶¥·¶ª¹¹ª·¶¨»·¬¹¶«¸¶ª¸¥®®³¬³°¡¶«±¬³±³°´¬µ¬¡µ¬£²®´²¶­¡³¬³­´« ³²µ¬¢µ±¤·®³­µ¯¥µ®¡¹­£¸±µ® µ®¡µ®³¬ ¶­´­ ·±¡¸®·¯ µ° ¸®¢´¯¤¹®£·®·¬·®¥¶¬ ·± ¸²µ± µ«¢µ¯¢»°·±¢º¯¤º¯¤·¯¸²¡·­£¹³£·¯¢¹³¡·³£·°¥¸²¡º²¤»±£»³¡»¶¡¸±£¹µ¢·´¡º³¡·¶¤¼³£»µ¦»³¥¼´¤¸²¤º³¦»¶£»±¦»²¡»·ª»´¦¿²¦»µ¡½µ¥»·¢¼²§»¶§»·¥Á¹©½·§¿¶¥»¶¤¼µ¢¼·§¼µ¤»¸§¿·«¾¶¦»·§¿»¦½·«¼·ª¾´§¾¶§¾·¦¼·§»¸§¾»§¿·©À·«¾¼©Àº©½¸¨À¸ªÀ¹©½º¬Á¸©¾»©¾º©¾»¬¾º«¾¹«Á¹§¾»¦¾¸©¿º©¿·©Á»¨Áº«½»«Â¹¤¾·¬ÁºªÃ·¨½»«Á»©¿·«À»¬Á¹¬À½«Ã¸«Ãº¬¾»©Â»¬Â»ªÀ»¬Àº¬Ãº®Áº¬Â¹«Â»¬Á¾«Â¾¬Ä»¬Ã¾©Á¾­Ã¼¬Ä¾©¾»©Ã¼¯Ã¾®ÁºªÄº¬Â½²Â¼­Å»«¿¹¬Ã½­Ã»­Ã¾«Ä¾¬Á½«Á»¬Ã¾¬Ã¾­Ä¾®Ã¾¯À¿¬Ä»¬ÃÁ¬Å¿¬Ã¾­Ã½¬ÄÀ®Ä¾¬È¾±Ã½¯ÅÁ­Ä¼°ÅÀ«Á»¬Ã¾®Ã½¬¾¹¨Á³¥À·¥»»©»»«¾º¨¹² ­ qx]lUrQ~oW|rf~_ndx`fgngw[|lUn]finizfu]t[{b{{fziUwgOq[Qq_Mo`KqdOrgMtgYxlUxoYzu`zfzgdn`~|]|dtg{d|{dw]zoQ|lSzoU{t[{]z]~w[|nQ|dQtdOugKxgQtiSzq[zz`dgziiiknqqnnt¬|° ¨ ¬¥·¬Á®Æ±Ò»Û¾æ«Ãð±Ìó·Ñú¾ØúÈàúÐäúÕçúÝìúãñúãñúçòúçòúçõúêöúðøúïùúòøúôúúòúúõúúöúúõúúïùúðøúð÷úë÷úêöúèõúêôúæóúãñúäðúèòúçðúãíúâìúáìúÞëúÙêúØæúÎæúÓàúÌáúÌßúÌàúÈÝúÇÙúËÙúËÙúËÙúÇÖúÁÓúÁÖú¼Óú¾Òù½Êô·Èï±Çâ«ÃÞ§¼á¤»Ú·É°Ä®À«¾©º£·¤«~«unifdgnkiigfonntikgi{_uY{nOulQzkMq`QudMtYIrYIn]Mq[Iq_Qn_KoYMl[BnYDlUKn]IgYKiYDiWIg_OidKk_Ml[Kk_Oo]OtkSwfYxwd{t]|uYr`{b~tbtb|]|nU|gYwgQxbQu`QuiYurdzo§¨­­­®³¨¸¸®ÀÃ´ÅÃ·ÅÄ²ÆÂ¯ÆÁ²ÇÁ³ÊÁ³ÈÃ²ÈÃ·ÈÄ±ÉÁ±ÇÅ³ÉÄ²ÆÃ²ÆÄ³ÇÁ³ÆÃ²ÇÆ³ÇÁ³ÈÅ²ÅÃ´ÊÅ³ÊÂ³ÆÃ³ÇÄ°ÇÄ³ÆÃ³ÈÁ³ÊÃµÇÆµÄÁµÇÃ²ÆÃ³ÈÃ°ÇÃ²ÆÂ°ÃÁ³ÈÀ³ÆÀ¯ÃÄ²Ç¿³ÆÃ¬ÄÂ´Æ¿°ÆÃ°ÈÁ³ÄÁ²Å¾²ÆÁ²ÃÃ²ÂÁ±ÅÁµÄÁ³ÆÄ±ÅÃ°ÆÁ°ÄÂ²ÅÁ±ÇÁ¯Ä¿±ÃÁ°ÃÂ´ÆÁ³Å¾°ÄÂ²ÄÁ²ÃÀ¯ÄÀ³ÃÁ¯Æ¼³ÆÁ­Ã½­ÅÀ³ÃÁ¯Á½³Ç½°ÄÁ°ÃÁ°Ä¼¯Ä¿°ÄÁ±Ã½²Â½²Â¼®Á½±Ã½®ÃÀ­Ä¾«ÃÁ°Ä¾°Æ¾±Á¿«Á»¯Ç½²Á½ª¾»­Á¾­Ã¾¬Ã»®Å»¯Á¸¨Á»­À½¬À¹¬¾»«Å»«½ºª¾º¬¿»ªÁ·ªÂ»­½¹­½ºªÀ¼ª¾·¬¾·«¾¸­¾¹©¿¸©½·§¾¸©º·¬¿·¨¾¸¬¾¹­Áº©¿·«¾¸©¿»¬¿¸®Á¼«Á¹¬¿»¬¼¹ªÁ¼©¿¹«»·­¾º«¾¹ª¿¹¬¾»«Á¹«½¸«Áµ§»·ªÀ¹«¾¹©¾·©¾¸¨¾·¬¾·¨¾·«»·¬¾¶ª¾¸§»·®¾·­»º¬¼·©»µ¨»¹¨¾µ¨½¸©½·§»¶¨½¸«º·¦¹·ª¾·©»¶©»¸ª»µ«»´©½¶¥º·¦¾·©»¶§¼´§¸¶©½µ§»·ªº¸¥º´§¸³¨»·«¸µ¦¸³©¾²¦»µ©µ¶§ºµ¦·µ¦ºµ¦·´¨»³¥·²¥¸µ¥º¯¡·²§·±¥¹³§¸³§·´¦µ²¦·³¨·²§¹®¥¹²¤·³¢º°£µ³¡¸¯¥ºµ©·³¤¸²§¸³¥¸µ¦¶«°°¤´³¨´´§µ±¥³²§·¶¥·³¢¶±¨³³¢¹µ§¶³¦·°¨¹³ª·²£°·§µ³¥¹´§´³¦´³¥¸³§·³¤¸´§´³§µ²¥·´©»·£·³¦µ³§¹µ©º¶¨´®¥³°¦¸¶§µ´¨¸³¤¶·§¹³¦··¨¹³¥·¶£¸´¨¶¸©¹´¦¹³¡º³¨·³§»µ¨·µ§¸¶¥·µ§¹µ¤»´ª¸·«º·«¹³¥º³©º·§¾µ§¼¹«¹¶¥»¹¨»¶­¸·§¹¸¬»·¨·¹¨·´¨··¬½·©¾º©»¹ª¼»«¼¹§¾¹¬½¹¬¼º©»¹­½¹§¾·¬¾¹¬½º¬¾»¬¿¹¬¼»¨»¸©¾¼¨¾¹­¼º«¼»ª½¼¯¿¸¬»½­Àºª¿»¬½»¬¾º°½º±¾¹¬¾¼®½»®Á»¬¾½°»¹¬¿¼¬¿½®¼¼®Á½°½»®À»±¿Á°Á¾¯Â»¯Á¾¯ÁÀ±Ã¼¯À¼¬¾½­¾¾±Â½³¿¾°¿¿²Á½®Ã½ª¿Á°Á»¯ÁÁ¯Ã½±À½°Â¾°Á¿¯¿¾±À¾±¿¾­ÀÁ°Â¾¯Á¾°Á¼­ÂÀ²ÂÁ­Ã½°Á¾±Æ½³ÂÁ±ÃÁ²ÄÂ±Ã¿²ÁÂ³¿¿­ÃÀ±ÃÀ¬Â¾±ÃÀµÃ¿³ÂÄ³ÃÀ±ÂÀ´ÄÃ±ÃÀ®ÄÂ±ÂÄ´ÃÂ³ÅÀ³ÅÃ³ÂÂ³ÅÁ´ÃÂ¯ÃÀ¯ÂÁ°ÂÃ´ÆÁ±ÄÁ³Ã¿±ÆÁ³ÂÃ·ÈÁ¯ÆÂ°ÀÂµÇÃ³ÆÂµÇÂ±ÅÃ²ÃÃ³ÃÁ³ÅÁ±ÆÃ¶ÇÆ³ÆÅ±ÃÄ³ÆÀ´ÃÁ³ÆÁ±Ã½°Àºª¿¾¬»½­¾À®½¿­··¥±¥¢{ozgw_wbzwg{fxf~xilqqozlzbrdkruqn|fuggl|i~q_wrWkkYoqSuo]tu`wt[xof{w`z{fzxdrl~n~zi||k~lnfzfud|o]{r_|{d{|ilnubl[{n`tuWrn[zq_x{bzzo|io|okor{xw|xt§~© ­¥³¦È¬Ì±Ñ¶Ú¹å©Åí²Èô¾ÐúÁØúÆÝúÐãúÚéúäïúëôúðöúïöúïöúðöúñúúðúúñúúõúúöúúöúúùúúúúúøúúúúúøúúõúúöúúôúúõøúò÷úï÷úíôúëõúéóúëòúìñúêóúêñúâïúÝïúÚëúÛìúÛèúÕéú×äúÓäúÓäúÐàúÒßúÐàúÕßúÐßúÏÜúÌÛúÌÙúÈ×úÄÖúÆÖúÃÓ÷¿ÌôµÈí±Åé®Âä¯Áâ©»Õ³Î²È¬Êª¿©¾¥¸¢³ ¨©|¡xrrinqqwuoltzuulol~g~fzw_wo[tq`xq[tlUriUr`WqgUobYniUlfUkbQk`Qn[Qr`Si`SlbUidSi`UkdYliWigSqfYnf]nq]ulbw{k{n~~fudn{qg{{n~ft`|r`{kUtfYtq`zzk|{u¤¤±¯¯ª±¡µ¶¯»Æ´ÁÃ¹ÃÈ»ÈÆ¹ÇÈµÉÄ·ÆÊ·ÆÈ·ÊÅ¹ËÈ·ÈÉ¸ÈÈ»ÈÉ·ÈÇ¶ÆÆ»ÈÅ·ÊÈ·ÃÆ·ÆÆ¸ÈÈ¹ÉÆ¶ÇÃµÉÆ¶ÆÈ¸ÇÈ¹ÊÈ·ÈÈ¶ÆÄ´ÊÆ¶ÆÆµÈÇ¹ÊÆ·ÊÇ·ÈÃµÊÄ¶ÆÅ¶ÄÄµÈÇ´ÈÈ¶ÇÆ¹ÊÃ·ÈÊ´ÆÆºÇÆ·ÈÈ·ÇÁ¹ÈÇ·ÈÅµÈÅ·ÇÆ´ÅÈ´ÈÃ¸ÆÆ·ÇÆ·ÅÅ¶ÇÁ·ÆÄ¸ÈÃ·ÆÆ·ÆÈ¸ÈÅ·ÇÂ¸ÇÆ·ÆÆµÇÄ¶ÅÆ¶ÃÃ¶ÆÁ´ÆÃµÅÃ¶ÇÆ´ÆÄ·ÅÅµÄÃ´ÅÀµÆÅµÆÃ³ÅÃ¶ÅÂ³ÂÃ·ÃÁµÅÁ¯ÃÃ²ÃÂ´È¾¯ÂÁ¶ÁÂ´ÁÁµÆÃ¶ÆÂ³ÃÃ´ÅÃ³ÃÁ´ÅÁ²ÆÁ³ÅÀ¶ÂÁµÅ¾´¿ÁµÁÅ³ÅÁ¯Â¿³¿Á³Á¾³Â¾´À¾³Ã¿±¿¿²Á»¯Â¾°À¿¯¾º¶Â¼¯À¼­¿¾³¾Á®¿¾¯¾½®Ã¼²¾¾¯¾»±¿¾¯Á»°¾¾³À½±¾¼±¾»±ÀÀ³¾¾¯À½´¿¿³ÁÀ³¿¼±À»°ÁÁ®¾¾¯¾½³Á¼®À¿®¾¼°¿¼¯½À°¿¼³¾½°¾¿¯À¾°¿¼²À¼³À»¯¾»­Á¾®¼¼¯¼»±¾»¯¿½­¿½¯Â»¯¼¼¯½»­¾¾±¿»°½¼­¼½³½¾¬¾»°»¹®»¼®¼¼­¾¼­¼¼®½»®¼»¬¾¾­¾¹­¾¸¬¿»¯º¹±»»¯»¸¬»»­¼¸¬»»«¼·®¼¸®½¹ª»¹©»º®¾»­½¶¬¼·­»¸ª¼µ©»¸®º·¬¸º¬¹·«¹·©¹¸¬¹·¬»·§»µ¬·´ª¸ºª¹·­»¶«·³¬º·¬·¸¨·´©¹³¬¸¸¨»¸«¹¸¬·»©º¶¬»¶­»µ¨»§®«´¬³®µ­³«³¬´¯·­ ´® ³¬µ®³­±«µ­¡µ¯´¯£´¯ µ¬´¯·«´­´¯µ¬·±¸¯ µ¬¢¶±³°¢µ­ µ­µ¯¸¯·®¶® ²­ »±¤¹± µ¯·³¡·°¶® ´® ¸±¶²£¸­¡´¬µ¯¡¹² ·±¶²£¹²¤µ±¡¶±¤¸°¡¸²¢·±¡¸´¥º±£·¯¤¼²¤·°£º°¥·²¦»³£¹´¡¸±£ºµ£·³¡»³£¸³£·²»³§¹´£·³¥»´§¾³¥»´£»¸¨º´¡»±£»´¦»³¥»·¦º³¤¼³¢»´¡»µ©»·¥½¶¥º´©»·¦½·¤¼¶¦¼º¦½³¥½³§¾¸¦¾´©¾º©»º§½µ£¾¸¤¾¸¬½µ«¾·¨½·¥½º¨¾º§½·©¼¸¥Á»«½»«¿¸«¾º¥½»¥»·¨¼µª¾·¨¿¸©Á¹ª¿»ª¾µ©»½¬¿»¥½º¬½»¨Â»¨Á¹¬¾¹§¿·¬¾»§Á»¬¾¸«¾»©ÁµªÁº¥À·¨¾¸«Á¸¨Á»ª¿º©¾»«¿»¬À»ªÃ½©Á»©Á¼­Â½¬Á»«Â»«Ã½­Ã»­¿»ªÂ½¬À¼«Ä½°Ã¾«Á¾¬Æ»¬Á»¬Ã¿¬Ã»©Ã¾§Ã»­Â½©Áº¬¿»¦Ã½¬Á¿®ÃºªÁ¿­Ã½¬Á»­Ã¿¬Ä½¬Â»¬ÂÀ¬Ã½­Á¾­Ã¾¬Ã½®Ã»­¿¼¬Ã»¬ÂÀ®Á¿«ÄÂ­Á¾«Ã»ªÀ½«Ä»©À¹©½¹©Àº©¿ºª¾»«º¬ °£¥|io]t[uUr]zw[~nU~oYx`glibnWkUx`foi|n{`nYgY~dgr]{_MufMqdIrdKr`UoqYwfSxfWwqYwrU|t`zwb|~dw`l]|t_q]`~{_~qYznS{nQzoWtW|{dz_r[zqW{gWwzQ|nQziUxqUzx`||`|~dt_xY_gkluniq¡qªzªu°¨Å®Ì´ÏºÚÀæ§Ãí¬Ìô·ÐúÀ×úÈßúÐåúØèúåíúêñúëôúìöúé÷úïúúîúúõúúôúúõúúòúúôúúõúúöúúôúúöúúúúúöúúôúúóúúôùúòùúðùúîøúëöúêöúêóúæòúæðúæòúàñúÛíúÜíúÖëúÖéúÕèúÒâúÔâúÏãúÐàúÐáúÐßúÎáúÎÞúÌßúËÛúÊØúÇÖúÈØúÃÙúÅÓú¾Òó´Îï²Êè­Åß¦Áà«¾ã¤¿Ú»Ì³È°È¬Á¨½£¸¦² ¬|zrrrnid`dld|_~b~dkdbz_qY{oYxqUztUxqQulOtgQqgOtgIr`Kr]KndIo_In]InYFkUFoUFfWBfYFg]KnWFlYFgWIi]OlfIo`OrdMq`QudOtl`xzg~dr[nd|z]~u`x[t_~nQ|lSxdUu_OxfQtq]xn]||r«©°¯­±­¡¶»®ÀÃ¶ÄÄ²ÅÂµÅÂ°Æ¿²ÇÁ²ÅÃ±ÆÂ´ÊÃµÈÃ®ÅÄ±ÆÀ¶ÅÄ¯ÇÁ¯ÇÃ²ÉÃ²ÃÂ±ÆÂ´ÆÃ°ÅÁ³ÄÂ·ÇÅ¶ÄÁ²ÅÁ´ÉÃ²ÅÃ±ÇÃ´ÈÅ³ÈÃ³ÇÁµÆÁ±ËÁ´ÄÀ±Å¿®ÇÃ³ÄÀ¶Æ¾°ÅÁ°ÆÃ³ÄÀ²ÊÃ´Æ¾°ÄÃ²ÆÁ´ÆÂ²ÆÃ²ÆÁ³ÆÀ°ÄÂ³ÇÃ³ÆÁ°ÄÁ±ÃÁ±ÄÀ¯Ä¾±ÃÁ°ÇÂ³ÆÁ®ÃÀ±ÈÁ´ÆÁ²Æ¾³È¾°ÅÂ¯Å¼±Å¾®ÄÂ¬Â½®Ä¿°Ã¾²Ä½¯Ã¾°Æ¾¯Ã½¯Á¾¯ÇÁ­ÄÀ³Ä¾®ÂÁ¬ÃÀ®Äº²ÆÁ­Ã¾«Ã¾®Ã½¯Á¿­Æ½®Â½­Ä¾®À½¯Á½­ÃÀ®Ã¾®À¼®Â¾­ÁÀ®Ã½­Ä¿¯À»­Á»«À¼¬¿»©À»¬Á»ªÀ»®À·«¾»©¾½ªÁ¹¬¾¾¬À¸¬À·«Á¹ª¾¼«¾·ªÀº«Á·¬¿¸ª¿º§¿¸ª¾¹ªÀ¸ª¾¹§¾¸«¾¸¬¾¸¨¾¹¬¼º©Á»«¿¼©½¶¨¾»¬¿¶­¾¹¬Á¸¨À¹§»·©½¸©À·©½¹¨½¹¬¾»§¾·¨¾º­¾º¤¾»«»¸«¾¹©¾µ«¼¶«¾µª½»¬¼·ªÀº©»¶«¾¸¬¾·©¾¸ª»·©»¹¦¼¶§»¶¬½º§½´©¾³¬º¶§º·©¼¸ª½µªº´ª¾µ¦½¸©¹µ¤·¸¨»µ¦º¸§½µ¬¼µ¦¹µ§»·¦½³ª¾·§¸¶¥»´§½¶¥¹´¨»µ¤·´¨»µ§¸³¥¹³¥·¶¦º¯£º´¦¹²§º²ª·²¥º²¤·³¦¸´¥»³¦·³§¸±¥¸³¦·±¤º²¤º²¤³³¥¸µ¤º±¥·²¡¹²§¹³§³¯¥¸³¤·²¥·ª °¯¨µ±¤µ¯§¶¶¤³´¤¶µ¤·µ¤¶³¡²³¦¶±¢·³¦²³¥µµ¤¸³¥»´¤³³¥¹°¤µ°¥¸´§·°¤·¶¨·³¨·¶¨µµ§·±¦¶µ¦·´¤¶³¦¶²£¶¶¥·¶§¶³§¶³¤·´¦¶³¡·´¦¶³¦¶¶¦¸µ¦»²£¶³§·³¨º´¥·µ£¸³¨··§¸³¨·µ¤³³£·¶¦¹¶«¹¶¥¹µ§»¶©ºµ©»·©¸¹©»¶©¸·¨ºµ¨»¸ª¹·¨¹¹«¿·©¹»¥º¶¨¹¸¨º¶§¸³¬»»¬º·§»·¬ºº«¼º¨»¸¬¼·«½»­¿¼­¾·ª»¹¥»»©»º§¾ºª¼¼«½»ª½º©¿º®À¹©½¹©½¾­¾º¬¾º¨¿»¬¾º­»ºª½»®¿»­¼»®Á»®¾¼¬½»¯Á¼¬½¼¬¿¸¬Á¼°¾»®¾¾ª¿¾¬¿¾®¿Á®¾¼­¿»®¿¿°¿¾¬Á¾±Áº¯Á¼¬ÀÀ°Â¾°Â½¬Á¾±Å¾¯À¾°Ã¿¯Â¿±¾¾¬Á¼®¿¾¯Á¾®À¿¯¿¾°Ã¿°¿¾³Á¿®Ã¿¯Á¿°Á¾¯À¾°Â¾¬Á¾±¾¼¯Ã¾±À¾±Á¿°Ä¾°ÃÁ¯Ã½²ÄÁ´ÃÃ±ÇÁ°ÁÁµÂÁ´ÃÁ³ÃÁ®Ã¿²ÄÀ¯ÄÁ­ÀÀ¯Ä¿²ÂÄ±ÄÁ°ÆÁ³ÅÂ´Ä¾¯ÅÁ³ÃÂ³Æ¿³ÄÂ¶ÆÂ·ÅÃ¯ÆÁ¶ÃÁ²ÃÁ³ÅÆµÆÀ³ÂÁ°ÆÁ´ÃÃ³ÄÂ±ÆÁ¯ÄÃ¶ÇÁ°ÁÂ³ÆÃµÆÃ±ÆÁ°ÃÂ³ÂÁ°ÆÁ«À½³Á¼¬¾Á¬¿¾²À¾²½¾¬»·§±­¨tzl|idzkg|d|tb|~ioowngt_x`n{{xrwfn_|ziokr_xgYu`UogOlkUrt`oub{nYxnWwu`|u`|w`|xq{~kug~~`|x`~ff~|i{x[{t[zqbz|]~`z|gxg||`~z`xk~_{w`wbxg|i{tgt`{]z`lwqu xux¨~®¡¶¤»ªÌ³ÒºÛ¡ºà§Åë¯Ìõ¶ÐúÂÖúÈÝúÒãúÛæúæîúéóúìóúðöúð÷úòúúòúúùúúúúúúúúúúúùúúúúúúúúúúúøúúùúúúúúúúúúúúøúú÷úúöúúóøúöúúóùúôúúòùúïöúíõúéòúèòúæóúäðúàîúÝìúàëúÛìú×çú×æúØèúØäúØæúÛáúÓäúÓáúÒßúÎàúÎÜúÏÜúÐÙúÏ×úÊÖúÄ×ö¹ÒóºÍò·Éí¯Èè¬Áå°¿ç«¿Ü£¹Ñ·Ì±Ì±È¬Å«½£´¬|ª£{wutklklnouzrkizd|w_{q`ww`w{[wz`tu[wq]uq]nnYulUqnQlbWldMngUkgYr_UnbOl`SibSk`Un`Od_Qi`QliWkn[qo[olYrr[tobw|i|zngtfzzd|k|iq|f|q[uk]ul_xl[uq`~qg{x§§°¢°µ§¶¶¦³·®»Å·ÃÇ·ÇÇ½ÆÅ¹ÈÆ´ÆÆ´ÅÈºÆÇ»ÇÇ¶ÇÉ·ÇÊ·ÉÈ¶ÈÇµÊÈ¹ÆÆºÈÇºÈÆµÈÇ¹ÈÊ¸ÌÇ´ÅÆ¶ÈÆ¶ÇÆµÇÈºËÈ¸ÉÆ·ÇÈºÊÆ³ÊÇ·ÅÇ¹ÇÃ·ÉÈ·ÆÇ·ÇÂ¶ÇÅµÇÅ³ÈÆ·ÅÅ¶ÉÈ¶ÈÄºÆÈ·ÈÈ³ÄÆ·ÊÇ¸ÅÈ¶ÇÆ¸ÆÃ·ÈÆ¸ÆÇ·ÈÈ¶ÆÆ¹ÅÃ³ÅÆ¶ÈÈ·ÆÄ·ÄÄ·ÇÃµÇÅ³ÃÆ·ÈÃ·ÇÈ¶ÄÂµÇÅµÈÆ¶ÅÁ³ÄÅ·ÈÄ³ÃÅ³ÃÂµÄÁµÅÄ·ÃÂµÄÅµÆÁ´ÃÅ¶ÇÁ²ÁÁ¶ÆÃ³ÃÂ·ÀÅ³ÂÃµÃÂµÆÂ³ÅÁ³ÃÀ·ÂÁ²ÈÁ¶ÆÂ±ÂÃ·ÄÁ´ÆÄµÆ¿³ÆÁ·ÃÁ³ÁÁ°ÂÁ³Ã¾±ÃÆ²Ã¿´Á¿²ÂÀ³ÁÀ³ÃÀ°Á¿²Â¾³ÀÁ¯ÃÀ±¾¾®Á½¯Á¾¬Á¿³À¼°Á»®À¾®¿½¯¿¼®¿¿°½»°Á¼²À¼¯½¼¯¿¾³ÁÁ®»¹µÀ»ª¿¾°¿¾³Ã¾¬¾½°À¿±À½°Á¾¯½½¯¾¼±Á¾¯Á¾¯À¼³¾¿¯¾¾³¿»±½½¯½¾¬¼»­À½±Á¼¬¼¼³¾¼°¾¼®¾¸°¿¿¯¾¾®¾¼°¿»¬¿½±¿¾¬À¼¬¼»­½¹­½»­¾¼®¾¹®¼¼¯À¼­»¼¬ºº®½¼¬»¾°½¾¯½¼®»»®¾»³»º¬¾º¬¹·¬¿¸¯½º¬»¹­º¾®ºº¬º»¯¼»«½»¯»»¬½·­¾¹§»¼®¼¸­¸·ªº¸®¹·¬¼»­»¶«»¸¬»»¬»¸«¼·¬¹·©º·¬º¹¨¼·¬¸µ¦»¸¬¸¸©º·¨¸·­¸¹©¹·«»·ª¹¹ª¹´®¹µ¬º³©»µ¬¶·§··©¾·«º«¬¬¶­²¬³ª·­´¬µ®¡¶°µ°µ­µ¬³®³²³¬µ®¢¶¬³® ¶¯·­µ©µ°µ®·®¶°·¯·® ¸¯µ°µ±¶¯¡·²¡¶±¡º­¡¹®µ­¡º¯·­ ´¬£¹°£¸®·¯µ¯·²¡¹°µ¯·®·²¶²£¹®¸²·°£»¯¼²¥º²¸³¦½±£¹´ »² º´£·²¥¹´¢º³¤¹µ¤»µ¢¸²£ºµ¥º±¢º²¤»¯¡·³£º³£·²£º³¦º³¢»¶£½µ¥»³¡º¶¤¹¶©¾´§½³¤¹¯¢ºµ¥¾¶¤¾µ¦½³¤¾·©»³§¾³£»µ¤À³©»¶¥¾¶¥»¸¡¼¸¦»µ£½¶¤¿µ¨¾·¦¼·§¾·¤¾¸ª¾·¦Á¸©¿¸¦¾·©Á·¦¼¹ª¾»¨¾¸¨¾º©¿¸¥À¶¨À·©Á»¥¾¹¨Á¸¦¿º©Á»©¾ºª¿·ª½·¥Á¸¦¿·§¿¶¬¾·§À¹«¾¹§À»¨Á»¬Á¹¦Á»¬Ã¼«Á½©Á¾­Á¹©Á¹ªÁ»©Àº§À»­Á»ªÂº§Àº©¾¾ªÀº­Â·§À»«Ã¼©Á½«Á»«Á»«Ã»«Á¾®Ä¼¬Ã¾¬Á¼¬Ã½«À¾«Ã»ªÄ»®Ã¾ªÃ½¬Á»­Á¾¬Ã»¬Á»«Ã¿«Á¾¬Å¾¬Á»«Ä¾¯Æ¼ªÁ»ªÃ¿¬Å½­Ã½¬Ã¼¬Ä¾­Ã¾­Æ¿¬ÆÀ®Ã½­Å¾¬ÆÁªÄ»¬ÄÀ¨Á½­Á¾«Á»¦À¸¢¾»§¾»¨Àº­¾µ§¸µ¡´¦« wz`u_u_q]~zYr[kWgY|x]glrdt[oSwdgruw|`bU|fU{w]ft]|]OtYFr_It[Kq`SukUufQx_UxiQtkStlYxqY{t[|l[|lYxq]|n[z|[rUzqU~lQ{iOxqU{qU~xU|qY{q[zUq[~]t]~nWxr]{zYwlQk[{qQzq[fgloqnt£r t¬z¥³§Ä²Õ»Û¡¼í¦Äî­Ëô»ÒúÃ×úËàúÓäúÛêúâîúèñúèôúêöúî÷úïúúðúúôúúøúúúúúúúúùúúúúúúúú÷úúúúúøúúöúúöúúôúúöúúóúúóúúöúúòúúðúúòøúóùúñ÷úì÷úèõúãòúáòúäïúâïúàðúÞìúÚìúÚéúØéúÕäúÓåúÕåúÕãúÓâúÍãúÎàúÍßúÊÚúÌÜúÊÜúÈÖúÊÙúÄÖùÁÒö¶Ðð¶ÊôµÌì¬Èç¬Æä§Ãß¦½Ú½Ñ¶Æ·Ð²Ê­Ä¬Â©±|¢¦ ©{¦uwqqkib_x]z_~kgngqbw]oUznOzkS{gStnOukOriSwfSrkOoiQufIqbKo]Mn]?n_FoYIlYInWFlUIlWDnU?gWFkUMq[DgdOn`KqdMtnWrf[{q[xob|udrWrg||bzd{du]nUfKu`Iu_QugQ|nb{~d|¢ªª³£´¹¸® ¸µ¬»Á³ÃÃ´ÄÂ³ÆÂ²È¾°Æ¿²ÇÁ³ÈÁ±ÇÆ¶ÆÃ´ÃÆµÈÃ³ÇÄ³ÇÃ°ÈÃ¶ÆÁ°ÅÅ²ÈÂ³ÆÆ°ÇÃ¶ÆÁ³ÊÂ²ÆÆ²ÈÁ°ÈÁ°ÄÁ°ÇÄ¯ÇÂ°ÅÀ²ÈÀ²ÆÃ±ÄÀ±Ç½³ÇÁ®ÈÄ®ÈÃ´ÇÃ³ÆÁ³Æ¿²Ç¿®ÃÁ°ÆÁ±ÅÁ´ÄÅ³ÆÀ°ÈÁ²ÆÀ°ÃÂ²ÆÀ¯ÄÃ°ÅÁ±Æ¾³ÄÁ±ÃÀ²ÆÁ¯Å¾®ÆÂ°Æ¿°Ã¾±ÄÂ°ÁÀ³Å¾¯Æ¾¯ÅÀ¬Ã¾²ÃÀ®ÆÁ°Æ¾°ÄÀ­Æ¿±Å¾±Ã¾²Ã¾®Á¾°Ã¾°ÅÁ®Á½®Ã¾®Â¾­Ã¾«Å¾¬Ä¿¬Â¼±ÁÁ°Ã¾°Ã¿±ÆÀ®Æ¿¯Ã¾­Áº­Á¼®Ã»®Ä¾¬Á¾°ÄÀ­Â¾¬¿º©Ä»®¿¼«Á»¬Ä¼ª¾º¬¾»©À·¬Á½¬Â·¬¾»©Àº©¿¸«¾»¬¼»¬Á¹¬¼·§¼¸©¿·§À·ªÀ»©À¸¬¾¸­À·«À·©¾·«¿»«Á¹©¿¸¨¾»¬¾·«Á·¬½º«»·¬¾¹¬¼·«Áº¬¾·«¾·¨½º¨¿·«½´ª¾¸«À·«¾»©¾¸«½º©¾·©¿¸«¾¸¥¾·ª¾·©½¸ª¾·©¼º¨¿·ª¼´§¾¸ª¼¶«Á·«½·§¾·ª¾¹ª»·¨¾·§¸¶§¼¶§»·¬»³ª»¹©»µ«½µ§»³¨¹·¨º¸©»µ©½µ©»²ªº¹¦¼µ§¹´§»³¤º¸¦º³©¼´¥¼¶¥»¶¨½µ¥¼´¦º³¦»²¤º·§¹·¥¹³§»²£»·§»±§¸²§µ¶§¹³¦¸³¨º³¥ºµ£»²©·±£·´£¶³£º³§·²§¹°¤¸µ¤¹±£¸³§¶°¢¹³£·±¤¶²¦»³¥·±¥·¬£²³¤·³¡µ±£¶³¤´³¦³³¦´³©´´£³²¤´´§µ³¢±³¦º·©´³§·³¦³¸¥¶µ¥¸±¤µ¶ª·°¦·³£µ¶¦µ´¥·³¤¸³§´´¦·µ ¶¶¦¶³§¹³¦¸¶¨·±¥¶µ©¹¶¦¶±¨¶²¦¸·¨¶¶¥»³¤·´¦¶¶§·¶¥·´¦¸´¥··§¹¶¥»µ¨·´¥¼µ§»¹§º¹©¹¶¥»·§¶·ªºµª¸¶¨··§¾¶©½·¦¹·¬¼·¨¸¸©¼·ª¹·¦¼¸§¹·«¼¸©·¸«¸¹¨»ºª»¹¨¹¹©»»ªº»¬¾·¨¾¹«¾ºª¾º«½º¬¼·¨»»­¼»«¼·©»»©»º¬½º¬½º¨»º¬½»ª½»¬¾»¬¾·¨½»­¾»­¿¼¬¾½«¾½¬¿½¬¾º¬»»¬¾¼­Á»¬½¾¬¿º­»¼¬¾¿¯»½°¾½¬¼¾¬ÀÀ®Ã¿©À¾¬½Á¯¿º¬Â¿®¾½­ÁÀ®Á¾­¾½ªÁ¾¯ÁÀ®¾À¬ÂÃ°À¿­¿½­Á¾­¿¾®Á¾¬À¼®¿¾³ÃÀ¯ÀÀ²ÂÁ°ÁÁ¯Á¾®Á¼®ÁÀ®Â¾¯À¿®Á¿¯¿¾¯ÄÁ²Á¿®ÃÀ¬Â¿¯ÂÁ±ÆÂµÁ¾±ÁÁ¯ÁÃ¯ÀÁ¯ÁÁ²ÆÃ±ÃÁ³ÆÁ±Â¿²ÂÁ³ÃÀ±ÄÂ±ÃÁ³ÃÁ³ÂÂ³ÁÅ³Å¿±ÃÁ°ÄÃ³ÆÂ±ÃÂ°ÃÁ®ÄÃ³ÅÆ³ÅÂ°ÆÃµÅÄ²ÄÁ²ÅÂ°ÆÃ´ÄÃ³ÆÃ²ÃÁ°ÂÄ¶ÃÁ³ÅÁ¯ÃÁ³ÆÁ±ÃÁ°ÃÁ¯À½®Â»®ÁÁ¬Á¿®À¿¯Á¾ª»»¥¶¯¬§«tfdzdxbzd{td~o]{u_x{fq{xl|bzflqx|ki[{od{q~lq`{bUobSqkUznSro`tt]uk[tk]ttWuo[uo`xxi|zbzo_xx]xrdz{`z|d{_zxbuo[xu[zz]{{b{|b|t`zfko~ixk|wbx_{u`xoY|u[~`r¤uuxt¤x¨|«~¨z ¬~¢º«Ì³Ö»ä¦Áô±É÷¿ÐúÃØúÌàúÒàúÛçúäìúâîúêòúðõúï÷úðøúõúúùúú÷úúøúúúúúúúúúúúúúúúúúúúúúúúúúúúúúúúúúúúøúú÷úúúúúøúúøúúöúúöúúöúúñúúòøúïôúîöúëôúçóúëóúêñúéñúâïúæíúæíúÜêúÛéúÙèúÖçúÖçúÕçúØåúØáúÖâúÐÝúÎßúËÙúÐÛúÐÚúÈ×úÃÐú»Óø¾Îú¾Ðö¹Íï±Åì­Çç¯Áè§ÀÝ ¹Ô·Ø ·Ñ ³Í ±Ï¬Á©·¢±¬¥¥wwwuni`ilgrnnq~gbx[xo]xlYtl[uq[xnYrq_qkWog]ul[lo_ui[qiSldOnfOq`Uq`SlbUi`OqdQk`Ok`SkfQilWng[niUrndoq`wrfuzdzxn|ixfzxi|fkb{btYxl_xl[uo[rtbx{nxª¥µ§³¾¬¸º£»·ª¹Â³ÁÆ·ÇÇ¶ÃÊ·ÉÈ´ÉÃ²ÅÈ·ÊÈ´ÆÇºÊÊ·ÈÈ·ËÆ¶ÊÈ¹ÈÌ·ÊÇ¸ÈÆ·ÆÈ·ÇÇ¶ÊÈ¸ÌÆ·ÉÄµÈÊ´ÈÈ¹ÇÄ³ÆÅ·ÈÇ·ÈÈ¹ÅÇ·ÇÄ·ÈÄ°ÃÇ·ÃÅ´ÇÇ¶ÆÄµÇÆ¶ÇÅºÅÆ·ÈÈ·ÆÇ·ÃÆ¶ÄÇ¶ÇÇ·ÈÆ³ÊÆ¶ÆÆ¶ÈÇ·ÊÆ³ÆÆ·ÈÄ³ÅÇ¸ÇÃ´ÅÄ·ÆÆ´ÈÄ¸ÄÇ´ÈÆ³ÆÈµÆÅ·ÇÄ¸ÆÄ´ÅÄ´ÄÄ¶ÇÃ´ÃÁµÆÃ³ÃÂ·ÆÇ¶ÄÅµÇÃ³ÅÆ·ÆÂ¶ÃÃ¶ÆÈ´ÁÃ·ÅÃ³ÆÃ³ÄÅ·ÇÅ³ÄÆ³ÄÁ¶ÄÅ´ÄÆ´ÃÀ³ÄÂµÃÃ³ÃÆ¶ÆÃ´ÂÆ³ÁÄ¶ÄÁ·ÃÁ´ÆÃ´ÆÀ³ÃÀ²ÃÂ³ÆÀµÃÃµÁÁ³ÁÁ±ÂÂ³ÁÁ¯¿À²À¾­À½°¿Â³Á½³Á¿±Â¿®¼Ã¯Á¿±À¾°Á»®½½°¿Á²Á¼±¾¼°Á¾±½¿±ÁÀ¯ÀÁ¯¾»¯ÀÁ²¿¾±¾½¯¾¾­¾½¯½Á±Á¾®Á¾³¿¼¬¾¿±Á¾±½½¯Á½®Á¼³½¿¬À¾®Á½²À½±Á¾¬¿Á¯¼½²¿¾­¿½­À¼°¼»°À¼°»¾¯»¼±¿¾­¾¼±¾½°»½¯¿¾­¼»²¾¹­¾¾®¾½³º¾­¼½ª¿¾¯¼¹®À¼®¾¾¬¿»­½¾®º»¯¾º¬»º®»»­½·®»»¬¹»ª¼»®¿¼¬»½­»º²¼º©»¸¬»º±½¼ª¹»¯»º¬»·­»»¯¹»¬»º¬»º«»¹¬¹º¬»¹ª»¹¬¹·ª»¹©··¬¼¶¬»ºª··§¾µ§º·¬¸´¨·¹¨¹¶ªº¶¬¹»ªº¶ªº¶¨¶¶ª¹¸¬¶·¨º¶¨º·¬¸¸«¹¸«¸»¬¸§¬«±¬±¯´¬¡³­µ¬µ¬£³¬ ´¬¶¯³¬¶¬³­´¬·¬ ·¯·­ ·®³¬´­·­³¬´« ·¯·¯¸¬³®£¸®·«¢·®·­ µ±·®¡·¬µ¯ µ­¡¸°£¹®µ±¡·¯¡¸° ¶°£³±µ¯·®¡·±£¶±¥º¯¶³¢¶­·²¡·¬¡¸® ¸® ·°»°¸³¥·²¡½¯¥»¯¡¹²¡¹°¥»²£·°£º³¦¼²¢»³¢¼²§»¯¡¸³¦»²¥º°£¼³¥¼²¥¸²¢ºµ¤»²¢¼³ ··©¾µ¦¾µ¡¼²¨»¶¥¼´£¾¶¦¼´¢¾´¤Áµ¦¹´§»µ«½µ§¼¶¥½±©¼²¦»²ª½µ©¾¶§¿³¦¾µ§¾µ§¾·¦À·©½·¥½¸§¾µ§¾¶£½³¬½¸«Á¶¦¿·§¾·©¾·¥¾¹¨¾µ§¿·«½¸§À·«Àµ¦À¶©Á·«Á¹¬¾·§¾µ§¿·©Á·©½¸ªÀ·¬¾»¨À¹¦À¶§Á»©¾ºªÁ¸©¾¼§Àº­¿·ªÃº¤Á¸ªÂ·ª¾»­Â»§À»¬Æ»«Á»¨¿¹­Á»¬Ã¾«Â»¬Ã»§Æ»«Á¸¬Ã»®Ã¼¬Ä½®Á¾­Á»­Ã»¬Á»¬Ã¾ªÁ¹­Á¹«Á»­Å»­Ã¹«À»¬Ã¾®Ã»¬Â»ªÁ½¬Ã¼¬Á»­Ä¿¯Ä»«Â½®Ã½®Ã½¬Á¹«Ä¾©Ã¾¬Ã¼¬Ã»©Ãº¯Ã¾­Â»©¿»«Á¸¬¿·©¾½¨Á¶§¾·¬Á¼¨¿·©¹³¤¸®±¡¬ntbwYr[kY|iU~n]zrUgUziSq_ntowbo[gfnrrkgY|_S{w[~ft_z[Qu[Il]On[Mt`MqiWukQw]OtdMtiQwfQugYutUu_UzdOtgYznU|nWxnUzlSxgQugStgQwwU|nWzoU|gW{~_uf~~_|q_|oYznYxkU|gQ|kM{qWllwlnt¦t§u¦u¬w ¸¬Ñ³Ò»à¥¿ó®ÍöºÏúÁÖúÆÜúÒãúÙèúÜæúßìúæñúêôúì÷úîøúïøúôúúòúúóúú÷úúùúúúúúúúúúúúúúúúúúúúúúúúúúúøúúøúúõúúöúúùúúøúúøúúõúúôùúóøúïúúìõúêõúéóúãòúåòúãòúãðúáïúÞíúßëúÛìúÛéúØçúÓäúÔãúÓèúÕâúÒãúÒãúÒßúÏàúÉßúÌÛúÌÝúËÛúÄÙúÁÕø¹ÒùºÐø¸Îô¶ÌíµÉé¬Çä©Áà§ÁÝ ½Ø»Ø¸ÓµÑµÎ²Á«¸¨®£¬~£x ttklfig`]u`w]rW~nY|q`zw]zxY|tWwgQwdQudOu_Mq_QqbSr_Mq_Mk_Ot`QqbOn`Mr_Iq]KnWIo[DqYFlYFnWFgYFkQFnYFk]InYMlYIq`SqkUtbWwtWul[wn`~o_u_|r`z_zg~|dkWzgUugWukSz`Qxk]|q£¦¬°¢³·§¼´ º´©º¾±ÁÃ²ÅÁ³ÆÁ°Ç»®ÆÃ°ÆÁ³ÇÃ¶ÇÂ³ÈÃ³ÆÁ±ÄÃ²ÇÁ³ÆÄ®ÅÀ³ÆÃµÆÁ±ÈÃ°ÇÃ°ÆÁ²ÈÂ²ÅÁ²ÆÁ±ÅÁ²Æ¾³ÃÄ®ÆÂ³ÆÃ²ÆÁ²ÊÂ²ÆÂ±ÅÃ²ÃÀ¯ÆÃ¯ÆÃ³ÅÁ³ÆÁ±Ç¿®Ã¾³Ã¾°Å¾²Â¾±É¿´Ç¿¯ÃÀ¯Æ¾°È¿¯ÅÀ´Á¾¯Å¿®ÅÀ°Å¾²Ã¾¯ÆÁ³ÆÁ±Å¾°Â½²ÉÁ°Æ¿±Ç¾°Ç¾°Ä¿°Ä½±Ã¾³ÂÀ¬ÅÁ±Ä½±ÇÀ®Ä¿²Â½³ÆÁ±Ã»®Ä¾­Ã¿²ÃÁ¬Â¾±Ã¾°Å¾°Ä¿°Æ¼¬Â½±Ä¼¬Á¿¬Ä¾­Â¾¬Ã¾°Ä¿®Ã»­Ä¾®Æ»²Ã¾¬Á¼¯Á·°Á¼¬Á»±¿»®Ã½¬¾»¯Á½¬Á»©Á¹©Àº®¿¹¬À»­¾º®¾¹¬Ã¸«¿·¬½µª¿»¨¾»ª¾·¬Á¸«¿·­½»ª¾º­»·ªÁ»«Á¸«À·­½·¬¾»©À¹¬¾º¬À¹¬½»¬¾¹¬À¸ªÀº¬¿·«Âº«¾·¦¾¹¬¿¸©¾¹«½¸©¿¸©»¹¬¾¶«¿¹¬¿·¨¾¸¬Â·©»·©»µ§½ºª¾³¨¼·«½µ¬¾µ«»·ª½´ª¾µ«»·©¿³§¼µ©½·©¼³¦¼µ§»·¨½µ©¼·«»³¨¾´©¸³¦»µ¤»µ«»´¤½µ©¼µª¾´§¼³§»³¨º±©½·¨º´¨¹´£·¶©¹³¨»³¥»¶¦º´«¼³¦»³©¸³©º³ª¾³¥·³¦¹´§¸µ§»³¦¸´§º´¥¸µ¦·´ª¹³¥½´¤¸²¥½³¥µ°¥¸³¥¸±¨¸²¤¸°£·±¨·´§¸°¥¶²£º°¤¸°¦·±£¸²¥·²¥¶°¥¸¬¡¬³¤³³£··¢¶³¡³´¦·´¦µ´§µ³¥¶³¡µ¶¦³³£¶³¥·¶¥µµ¦·´¥¶³¡¶µ¥µ·¥¶¯¢µ³¥¸¶¥³³§¶¶¦¸µ¥·µ§º´¦¸¶¨¹´¥··¥¸·¤µµ¥µµ£¹¶¦··§¸³¤¶¶¦»·¨¹¸¥·µ¡º·¦¸º¤·¶¥»¶¥¹¶§¸¶¦¹·¨·¶§·¶¤¹·©º¸¦»º§´·©º¸©»¸¨¼µ¥º¹©¸·«¹¹¬¼¶§º¶¬¹»¨»¶©º¶§¹¶¨¸¸§º¸©¼·ªº¹«¼ºª¹¸©¼µ¨¹·§½·ª¾»¬¼·§¾º¬»¼¬¼¼¬»º¬»º©½¹¨¼·§»¼¨»ºª¾»­½·«½»¬¿»©À¹¬¾»°¾»¯¿¹®¿»®»¾¬¾¼¬¼¹«À¾¯¾»®¿½­¿º¬½¾¬À¾®Á¼¯¾»ª½¾°¿À­¿¾­¾À®¾½¬Á¿¬Â¿­Â¿®»Á¬Á¹¬Â»­Á¿©À»¬Á¾²¿À¬¿¾¯ÀÁ«ÀÁ±Â»¯Á½¬ÁÁ²¾Á¯Â½­¾¾®Á¾°ÁÀ®Ã¿°¿Á¬¿Á­ÃÁ®À¿®ÁÀ­ÄÀ¬Å¿³Á½¯Á¿°Á¿¯À¿°ÃÂ¯Â¿°ÂÀ±ÂÂ®ÆÄ²À¿°ÇÁ±Ã¿²ÂÁ¬ÁÁ²Ä¿¯ÂÂ°ÄÃ³ÁÁ³ÅÃ³ÆÁ³ÂÁ°ÃÁ®ÃÃ³ÂÃ°ÃÁ³ÃÀ³ÆÃ°ÃÃ³ÄÁ±ÄÂ°ÂÄ±ÃÁ´ÆÃ°ÃÃ®ÄÂ°ÃÆ³ÄÃ±ÇÁ­ÄÃ³ÄÄ²ÃÂ¯ÃÄ±ÄÁ®ÃÃ²ÅÂ±Ä¾¯ÁÃ®ÁÂ±¾¾«À¼«¾¿­À¿­À½¯¼¿¬½¶¥´¯¬¦¢k|dbwg|d|ub~{b~u_{ub|xdi|zo|fiqzuxzki[{o`|n~l|q_wfWunKnl]tiUugYqo`rn[xiWnoWqq]tlYuu`tu_xo[ut[rwb~z_{z_tz[tr]xrYxr]wu[x]xx]wu_~z`gqf~udwx]zuYwuYzt[|[kuun¨~ª~³~­¤³¥Ä¯Ö·Þ¡»í®ÃõµÎú¾ÖúÅØúÒàú×ãúÝêúßìúâîúèïúëöúî÷úòøúóúúõùúõúúöúúùúúúúúúúúúúúúúúúúúúúúúúúúúúúúúúúúúúúúúúùúúúúúúúúúúúùúú÷úúõúúöøúó÷úó÷úïõúìöúëóúêôúëóúçñúåðúãîúáðúáìúÜêúÜèúÛæúÝéúÛéúÚæúÜæúÕçúÕßúÒáúÒàúÕáúÓàúÐÞúÊÙúÈÖúÆÖúÃÒúÃÐú¿ÑõµÊî³Çí³Æè¬ÅäªÀá¤¼Þ¦ºÝ©¶Û©¹Þ¶Ò³È©·§¸¡²¬§|¤{utoqnnlk~[{u_{w]zq`x|bzdx{[zx_{rUooYui[oq[roWroUqiQtiWqkUko[uiMniUliYobQlgQniSnfQkiOl]QkfQkgSll[llSon]lzbzt`zwbwxf{zd{|i]|tggoi~w`xo_{udwu_ut`|ub{o®ªµ¤´¼¨»¹©º¾¬»¿±¿ÇºÂÇºÈÊ»ÉÇ³ÆÂ´ÈÊ¹ÅÊ·ÇÉ¹ÆË´ÈÆ¶ÆÆ¹ÈÊ¹ÈÇ¸ÇË·ÊÉ·ÉÆ¶ÈÈ¸ÆÉ¶ÆÅ¹ÇÊ·ÆÈ·ÉÊ¹ÈÆµÇÆ·ÆÈµÈÆµÅÆ´ÆÈ¹ÈÆµÆÈ¶ÈÈ¸ÇÈ»ÈÈ·ÅÆ·ÈÈ¶ÊÅ·ÇÃµÃÆ³ÇÇµÉÈ·ÆÆ´ÉÆ¶ÆÈ¶ÇÅ¸ÈÅ¶ÆÃ³ÃÆ·ÆÆ±ÅÅ´ÆÅµÇÅ·ÄÆ¹ÃÇ³ÄÅ·ÈÂ´ÃÈ³ÊÅ·ÅÆ´ÅÄµÇÄµÆÇ·ÃÄ·ÃÃ´ÆÄ·ÈÇ¶ÉÂ´ÅÃ²ÃÆ¶ÆÅ·ÅÆ´ÅÆµÃÃ·ÂÂ¶ÆÄ³ÃÄ´ÆÅ¶ÂÄµÆÀ²ÃÃµÁÂ³ÅÃ¯¿Á³ÆÂ´ÄÆ³ÂÁ³ÅÁ³ÁÁ´ÄÈ³ÅÃ³ÃÁ³ÂÄ¶ÅÁ³ÂÃ³ÂÅ³ÂÁ´ÁÃµ¿Á¯ÁÁ´ÁÁ´ÃÀ¯¿À±ÁÁ®ÀÁ±Â¾¯Á¿®Â¿®¾À³Á¿³¿À®¿½¯ÀÀ¯¿»®Á¿±¾¾®À¿²¼¾²Á¾±Â¿±¾½´Á¿°½Á¯¿½­¾À±¾¾±ÁÀ±¾Á¯¼Á¯À½´Á¾±¾¾¯½¾®¿Á®½¾¯Â½­½À²Á¿²½¾°¿¿®ÀÁ°¼À­¿¾°½¼®»¾°¾½®¿½¬½½¬¾½­¿»¬¼¿¯¾¾°¿»±¼¿¯»»­¿»°½À±¾º®¾»¬¾¹©»»­¾¾ª¿»¯¾¾±¼¿®»»°¼ºª¾¸²½¼®½¾¬»»­½¼«¹º®¾¾¬¼¹¯¾»¬¼»¬¼¸¬º¼¬¼¹¬¼¼¯½¼©½»¬½¸¬¼»¬»¼®¾¸«¼¹¬¹»ª»¸¬¹¹¬¼·©¸½¬¹·«º·©··¯¸¸ª»·«»·¬¹·«¶»¬»º¬»¹¬·¹­º»©··©»·§»¶¨¹¹®·¹«··©¹¹¦¶·¬¶¶©··«¹¤®ª²«µ­¡³¬³¬±¬¡³­£´®³«µ¬°¬ µ¬µ¬¶¬¡µ® ²®³­²«£¶®·®´¬µ®¶® ¶¬¸°¡·¬µ®µ®·«³®¶­µ°³­¢µ²¹¯£´­ ¸®´¯¹®¡´® ¶² ·¬ ·°¸¯¸­¡¶®£¶®¸±¡´­£¹³¸² ¸¯£·®´²£¹°¡·³¡·®¡¶¯£µ­¢»²¡·²£·²¤¸°¦»±¡»²£½²£»´§¶°¦¹¯ ·®¤¹³¡¹³§¹´¢»³¥·³¤¹³¥»²¢½³¥¹±£½³£»´§¹³¤¾¶¥»µ¤»´£»³¤»¶£»·§»µ¦»³¨½·©¼´¦½´¬¿³¤ºº¦¼¶¦¼¶£¸²§»µ¨¾³©»¶£½·ª»´¦¾µ§»·§½·§¼·©»¸§¾¹¬¿·§¾·ª½·¥Á¸¨¾·©½·§¾¶§½¶©½¶ª¾·¬¾¸ª¿·ª½¹¥¿ºªÁ·©À¸­¾·¬Àµ¨¿¾¨Áº§½·©Á¹«Á¸«¾·ª¿¸¨Á»¬¾·¬¾¹«À¸©¿¸¬¾º§À»«Áº¬Á»ªÁ»¨Á¸©Á¼¬¾»«Ã¾®ÂºªÃ»«ÂÀ§Â»ªÁ»¬Á»¬¾¾°Ã»®Æ»«¾¾¬Ã»¬Áº­À»®Â¼¬Á»¬Á½®Á»«Ã¼®¾½­Ä½«Ãº«Á»¨Ä»°Á»¬Ã½¬Ã»¬Â½­Ã¾­Á»­Ã»®Â½¬Ã»¯Ã»«Ã½®¿½ªÁ¾­Á½¨Á¹§Á¶¤¾·¦¾º§Á¸¨»º©¸µ¡·§© ¤kx[qYnYw[~q`~q]{nWzgO{kQr[lqitdl[z`zknqr~dn[~`U|g`~gz|WzYWqUKnbKodKk[Kr`UtgOrbSnbOogKqbOr`IqlUt`QqgSwdSulWxkUwkQufOwlStiMukOtnUwqStnUzgYxq_{fbq]zgQugQtgMwiQzlW{`foiln£q¦t§w³z£»®Ì´à Àç©Ãö²Íø¹ÒúÆØúÌÝúÒäúØèúÚìúäïúâðúçïúèóúêôúî÷úò÷úòøúòúúòúúöúúúúúúúúúúúúúúúúúúúúúúúúúúúúúúúúøúúøúúùúú÷úúöúúöúúõúúðúúñùúð÷úí÷úìõúæõúåôúæòúãðúáïúÝïúãìúÝìúÜìúÚèúÙæúÖéú×æúÙäúÖæú×çúÓãúÔáúÓàúÏÝúÔÝúÐàúÐÞúÊÝúÇØú¿ÖúÁÔúÆÐúÂÓù¾Ðô´Ïï°Çå«ÄåªÅâ©¾Ý£¾Ö£»Ú£·Ý¢»Û¥¶Ô¶Í±½§³§¯¢©{©z¦{qnnklnndx[~oMziWzlUwqSuk]wxWxqM{iQw`Iq`Ml_MugQqfMn`Ot`Ki`Ol]MnbMo]Ik`Ok_Il[Kl[FnSIl]FkYIkYDo]DkYQn[Fo`Qng]olWzlYwtYzndxod~{]zf[|q_zub|fo]zkUxgSugWwkQzgYuob~x¤¬®µ£´³¤¸´©»»§À»­¿ÁµÄÁ¯ÅÂ°Ç»®ÅÃ³ÇÃ´ÈÀ®ÆÁ°ÄÃ³ÇÁ­ÃÃ²ÈÃ³ÉÁ³ÆÂ³ÉÃ²ÈÁ±ÈÃ²ÃÃ±Ä¿±ÅÁ°ÅÀ²Å¿²Ç¾³ÅÃ±ÆÁ²ÄÁ²ÇÄ°ÅÁ³ÈÁ°ÅÁ±ÆÃ²ÆÁ³ÅÀ¬ÄÀ²ÄÀ¬ÅÁ²ÇÁ¬Æ¾­Ä¿²ÇÁ±ÆÃ±ÈÀ³Å¾²Ä¾¯ÇÁ®ÆÁ®Ä¾®ÃÀ­Å½¯ÂÀ²Ç½°ÆÃ²ÄÁ²Æ¿°ÆÁ¬ÄÃ°ÆÁ°Ä¾±Ã¾°ÃÁ´ÅÀ®ÂÀ±Â½¯ÄÁ­ÄÀ®Ä¼²Ç½¬Ã¾²Ä½°ÃÁ®Æ¾¯ÃÁ­ÆÁ±Ç½®Á¾±ÂÀ¯Â¼®Â½®Æ½®ÂÀ­Á½¬Â¸®Ã¼¬Å»®Á½¬¾½¯Á½®Ãº®Ãº¬Äº¬¿»¬Á»¯Ã»¯Á½®Ã¸¨À¿­Ã¹®¾¹°¿º¬½¸®Á¹¬À¶¬¿¹¬Á¸¬À·©½·ª¾º¬À¸ª¿»­Â»©¾¹ª½¸«»·¬¾·ª¼»¬¿»¯Á¹©½¸¬¾ºª¿»©Á¸¬¾»¬À·¬½¶¨¾µ«¾¼«¾¹§¼¹ª¿»©¾·©À¸ª½¹«½¶¨½¸«¾¶©½·¬¿·«»µ«½·¨½¹«½·«½·©º¸¬»ºª»¸«»·§½²§»¸§¾µ¬¼¶§»¶¨¾µ©ºµª»·§¾¶©»·§»³ª»·¨»µ«»µ§»µ©º¶«¼³¦»¶«¼µ©½´ª¸³©»´©¼¶¨¼´¦¸µ¨·´¦»µ¨º³¦¹³¨»µ©º·¨»³¦»³§»³¥¸³§»´©¼´¥¸¶¨¶²§»´¤·°¥·³¥»´¨º°©·²©»³§»¯§¸³§·²¡¸²¥º³§¹²¦·´¢µ²¦¸²¥·¯ ·³¨µ³¦»³¥¸±¤µ±£²²¤µ±¤µ²¤µ³£·²£·¬¤°³¦³³¥¶³¤¶´¤µµ¢¶´¦¶¶¤¶µ¤¶³ª¸´ ³³¡´·§´µ§¹´§¸·£´µ£µ´¤·°¥¸³¦³·¦¸´¤·³ ¶³§·´¤¶¶§¸¸¤µ³¥¶·¤·¶¥³³§»¶¥µ¶¥·¹¥··¦¶²¥µµ¤º³§¶±£³³¦¶¶§¹·¥µ·©¹³¦º³¦¶µ¤¸·¨ºµ¥µ¶¡¶·©¶¸¨»·¦µµ§¹º©¸¶¨º·§º·¨º¹§¹·©ºµª¹·¨º¶¨º¹¬º¸ª·»§º·«»¸©½º¨¹³¦¹º¨º¶§»¹¬»¹©º·¬º¹ª»¹¨¹·¬»»ªº¹¬½¹©¹»©½¼­¾»¬½¼¬½»«¾»¨½¼¬¾·¬¼¼¬»»ª¼»¯½½¬¾ºª»½®¾»¬¾¾«»»­½¾ª¿¼¬¾»¬¼¸¬¿¿¬À¼¯»¼¬À½¬½¾¯¼»­ÁÀ­¼¾±¾¾®Á¾¬ÁÁ®¾À¯ÀÀ¬»¿¯À»®¾¿®À»ª¾¾¬Á»­¿¾¬Á½¯ÀÀ­À¿°À»¯Á¿®À¾¯ÀÁ¯Ã½¬¾À¯ÀÀ­ÀÂ±¿À¯Ã¾®¾¿®ÃÁ±Ã¾°Á¿±ÃÁ°Á¾¯¿Á¬ÁÀ¯Á¾°À½±ÂÂ¯ÂÁ¯ÃÂ²ÄÁ¯ÄÃ±À¿´ÅÂ°ÄÁ±ÃÀ³ÃÃ³ÁÄ³ÄÁ³ÅÅ²ÃÃ´ÂÀ°ÃÃ³ÄÃ°ÄÁ±ÃÆ³ÂÁ²ÃÃ±ÃÂ±ÅÃ°ÃÁ±Æ¾³ÅÁ­ÁÀ´ÃÁ°ÂÃ°ÆÂ³Å¿³ÅÂ­Ã¿­¾Ã¯ÄÃ¶ÄÂ´ÆÂ³ÅÂ´ÅÁ²ÄÀ²À¾­ÂÃ¯ÃÀ¬Ã¼¬»¿¬ÁÁ²ÂÁ²¿Àª¶²¡°¨¨ ~{i~bzb{ib|gf~u]uk]x|fix{n|g{knrt|wiob{k_{{ir|d|_WqbQriSngUrf[tz[tq]ul]ukUqnWrlWukUqq]qi]qr[rn]ux`zw[|uYzt_quWxwYu{Wxx]|uWuqYxq_|i{roub|uSxt[ztYz{]{bkoxq r©|²|·¤½¬Â¯Ô¶æ¤Àð¯Æ÷¸ÌúÃÓúËÝúÕßú×çúÝéúáëúêðúëòúìõúïöúñöúðöúôúúôúúôúúøúúúúúùúúúúúúúúúúúúúúúúúúúúúúúúúúúúúúúúúúú÷úúùúúöúú÷úúöúúöúúõúúõúúôúúòöúïöúíõúíôúìôúçòúäñúäñúäíúåîúãñúÝíúÜêúÚêúßæúÛèúÝèúÚèúÜéúØãú×äúÕâúÚåúÛãú×àúÌÝúÎÝúÈÚúÊÖúÌØúÊÔúÆÒú¾Îö·Ìð·Èí°Çé±Ãå¬Áâª¾à©»â«¾ã¬ºâ¨·Ú¸Æ®Á¨¼¥´±´©¤x wwuxrib~x_|u]{x[wz`x~bx_|x[tw[uoSrgQnl[nqUonQtlQlkYoiUngWorOtkQonQoiWnbOofQkgUli[niSlkUkg[kkSoi[nrbogxwiz|f{{i~rf{z`|udxdo|d|u`~rdxu`zrYtq[xukx²¤­»¬¹¾«¼»«»¾±ÃÄ¯ÁÆ¶ÄÈ·ÈÉ»ÈÅµÆÈ·ÈÆºÊÊ·ÉÈ·ÊÇ·ÈÈ´ÆÈ¶ÇÈ¶ÈÆ¹ÈÈºÉÉ·ÊÆ·ÉÇµÈÊ¸ÈÈ·ÊÆ¸ÆÉ·ÈÈ¶ÇÈ¼ÈÉµÆÆµÊÇ¶ÆÆ¸ÆÇ¶ÇÇ¸ÈÉ´ÇÈ·ÆÇ·ÉÆ·ÇÇ·ÉÅµÆÆ·ÆÆµÇÆºÅÆ¶ÆÃ¸ÈÆ·ÆÆ³ÃÆ·ÅÂ³ÄÃ·ÅÇ·ÅÃ´ÃÉ³ÅÃ³ÄÄ·ÈÆ³ÆÇ³ÅÆ·ÆÈµÇÆ³ÇÆ¶ÆÃ¶ÅÄ¶ÃÅ¶ÈÆµÇÃ·ÄÅ³ÇÅ·ÄÃµÁÀµÃÅ·ÅÁ¶ÄÈ³ÆÂ³ÃÆ·ÅÂ¶ÈÇ¶ÅÃ³ÄÄ·ÃÆ·ÅÄ²ÆÁ³ÂÃµÆÂ³ÃÁ³ÃÃ´ÁÃ²ÂÃ²ÆÂ°ÅÀ´ÂÃ³ÂÃ²ÃÁ´ÂÀ¶ÅÂ±ÁÁ³ÃÁ³ÂÁ²ÂÁ³ÁÃ³ÅÁ±ÁÀ³ÃÃ³ÀÀ°¿¿°ÂÁ°¿Á±½À´Ã½¯¿À³¿½´Á¾­¿Á¬Â¾²¾¾­¿¼°Á½±Á»­¿¿¯ÁÁ­¾Á´¾Á°ÁÃ³ÀÀ±Ã¾³Á¿°ÀÀ³Á½²¾À®À»²¾Á¯¿Á¯½º±½Á­¼»¯¾À³¿¾¯¼¿­½¾¬¿¿¬½¾¯½»¬Á¿²¿¾°¼»¯¿¼°½¼­»½­¿¼³¾À¯¿¿±¿º³¿¾¯À½¬Â¼­¾¾¬Á»±½½¯¿¿®¿¾®¾¼­½¼¬¼»¯½½¯¼¼«»»¬¼»®»¾ª»»¬»·«¿»¯¼¾¬½»«¾¾®¼¸ª»¾­»»®»»®¼¹¬¼º¬½»¬º½­»¼±¹»¬¼»ª»¸¬»º¬¼»¬¸¹­·¸©»ºª»·­»»¬»¹ª»½¬¼º¬»»§ºº®º¸©¹·¬·»ª¹¹«»¹®¹»«¹¶¬¹·¨»¹«¹º®º·©·¹¬¹¹§¸µª··ªºµ©¸¶¬·¹¬¸¹ª¶¥­­¡³©µ® ¸«³¬ ²¬µ®µ¬³¬´«´­¡³©µ­¢²­´®¡·­³¯ ²¬¶¬²®³«´ª ³¬¡´«µ­·¬¶®£´®µ­´­·­¶®´®µª¡³®¶®·®¡¶®µ±³¬µ®¡µ­µ¯·®£µ°·®µ°µ² ·­ ¸­¡µ²¡¶²£·±£¹®¡¹®¶°£¹°¡»°¡·²£¼²¡¸³¥·²¤¶²¥·³£¹³£¸³¥·³¡¹±¢¼°¢º¯¡¹°¦»³ ¸´¥¹³¤·²¤»³£¹³£»²¤»³¢º³£»¶£½µ£º²¥½³¤¾µ¤¾µ¦»¶¦¼³§»·¤»´©¾¶£»µ¦»®¦¸²¦¾¶¥»¶¨¾´£»´¦»·¦½µ§¾´ª»·©¾¶©¼µ¨¿·¨¾¶¥½µ§½¸ª¾·§½¶¥¾¸©»¸ª½·ª¾¶©¼¸©À¸«½»¨¾µ©¿´§½º©½¸­¾·«Á·©À·©¾·©¾¹«½·¬¾¶§¿·©À¸§¾»¨¾µ©Áº©Á¹ª¾¸¬Á¹ª½º«À¹«Áº©¾¼ªÀºª¿»©Á·ªÁ¸¨Áº«À¼®Ä¹¬Ã¼¬Á»­Àº¬Á»¬À¹©Ã»¬Â»¬Ã¾¬Ãº®Ã¹­Á»¬Ãº¬Àº¬Â»«Â¹«À¾®¾½«Á¸­Â»­¿»«Â½¬Ã¾©Ã»«Ä»¬Â½¬ÁÀ«Â»ªÃ»®Ã»«Ã¾¬Ä»®Â¿¬Ã»°Á¼¬Ã¾®Ã½¯¾»¬Â»¨Á´¦¾»©¾½®¿½«»»¬»± ³¤¦wzdq]nUn[{rY~n`nY|gSw`OudQwub~_~ggudo]dnqrq|kq[|b[xkY|d{bdUtUFi[IlYFl_Fk_UngUt`Uo`ModMq`In_On`Iq]KqbKn_QnbStkWzoQtdOt`KukQqkQwqStkWxfOwfMwoQxq]{~d|qWzfSwfQxlQxnSzzU~`bfdi¦o«u±{£µ|ªÂ¯Î·ß½ê©Ã÷¸ÒúÁØúÌÛúÒàúÖæúÙéúÝêúáïúèðúêòúêôúìöúîöúòøúòùúñùúòúúöúú÷úúùúúøúú÷úúôúúøúúøúúúúúúúúøúú÷úúøúú÷úúøúúøúúøúúóøúñúúñùúôöúð÷úïöúìõúéõúèòúåïúæîúâðúßîúàìúáêúâíúÝíúÙéúÙèúÖåúÕäúÙäú×äú×åúÖãúÖßúÒãúÑÞúÖãúÔÜúÒßúÌÙúÄÙúÁØúÈØúÌÖúÈÒúÅÒù¾Òõ¸Îó²Êè®Æè¬Æé§Áß¥ÁØ¢¼Ü¤ºß§¹ß¦»Ü ¶Ì°Ä­»¦·¤­ª{§|wnkqinidzbuU|rS|oYtfSwqUwkStqUxnSwlKn_KqYKtbKn`QqbMk]Ml[MkYMq[MobKo_IqYMk[IkYIk[?gYOlYIg`Mo[Mi]Kn[QngSwnYuf]wn]zr[zld|_|l[zgYzq]|zdwd|nY{kOwfYxiUugUxgUtrgz¤«°¤¶¹¬¸¹¥¾µ¨½º¬½½®ÀÀ®ÆÄ²ÁÀ±ÇÀ³ÅÀ´ÇÂ³ÈÄ´ÉÁ²ÆÁ³ÉÃ²ÊÄ·ÈÃ³ÆÁ²ÅÃ³ÈÂ´ÊÄ´ÈÂ³ÆÀ±Ä¾²ÆÃ³ÆÁ°ÅÁ³ÇÂ³ÈÂ³Å¾³ÈÁ­ÇÁ³ÆÀ³ÆÁ±ÆÀ³ÆÃ²ÄÄ°ÃÂ²Æ¾²ÃÃ³ÆÃ³ÄÁ®Å¿±ÂÃ²ÈÀ­ÁÁ°Ä¾°ÆÂµÆÁ³Ä¼­ÄÃ°Ã¾³Ä»±Ã¾®Ã½±ÄÁ¯ÃÀ®Ã¾±Á¾³Å½²Ã¿¯Ã¾²Ã»­Â¾±ÂÀ¯Á¼¯Ã¾°Å¾«Á¾°ÁÀ²¾½¯Ã¿®ÃÀ±Á½®Ã¾³Ã¼­Ä¾®Ã¾°Ã½¯ÇÁ°Ã¾«Â½±Á»±Á¾®Ã»°Áº°Á¼®Á½­Á»¬Ã»®À¼«À¾«Á»¬Á¼®½¼¬Á½­Á¾°Á»®Á»ªÁº¯¾º®Ã»¬¼¹®¾»¬¾º¬½¸­½¹«À¶«Áµ¬»º­¾¹ª¿µ«¾»«À·¨¾¹«¿º«¾¼­¾¸ª½¸©½¸­¿·«½·®¾·©½»¬¿¸©»¸¬½·ª¼¹©½·¬¾µ¬¾¶©Àº®¾ºª¹¸¨¿·¬¾¸©¾¹°¾·¨½¶ª»¶¦¾·¬»µ©»µ§½·¦»´§À¶«»¹¬¾¸«¼³©¾·©¾¸¨»¶ªº¸©½¸©¾¶©»¶¨¼µª¼µ©»´§¹´©¼·¥·µª¹µ©»³¥»µ§½µ¦»³ª¹·¤»¶§¹¶©¸²§ºµ§º³©¹´©¾·§»µ¨º³ª»³©»³¥»µ§¼µ¦¼·§¸³¨»³§¸³¦¹²¦¸³¥»´¨¸°¦·²£»¯£º³£·±¥¹²¥¹²¥¸²§¸²¤·³£º®¢·³¥¸³«·²£º±§¸²¦·°ª¸³£¸µ¥·®§·°£·±¥·­·°¦¸¯¥¸±¥·¯§¸±§¶©§²³£´³¦´³¦¶³¥²³¦¶³£¸´¤´±¤¶³§¶³£¸´¦µ®¤·µ¤±³¥·°¦·³¢·³§·³¤·²¦µ³¥³³§·µ¦´°¥µ±¤·³¨º¶¥·³§µ³¤·´¦´¶©·³¨¹´¥·µ©·´§·³¤¶³¦»µ¨·´ª»³¨·°§¸´¦·µ¥¶´¥··©¶·¦»³¦¸¶¨¹¹§¶·¨¹¶§¸¶¦´µª½²§»·ª¹µª¸¹©·³ª·¶¬º·ªº¹¨·³§¸»ª¾µ«»¹¨»»®»¶­¼·¨º·®¾¹ªº»¬½¹ª»¸¬ºº¨¹½¨½·©»¹©½»ª»»­¾¸ª¼¸ª¿¼®»¸¬¾·¬»»©»º«¼¸¬¾»©¼·¬»¼¬»»¬¿»ª¼»¯»»®¼º¬Á¹ª»¹®»¼­¾½¬¿º¬¼»­¾»¬¾¾¬¾¼®»¼­¾»®½¼­»¾¬¼¾¬¿¿¬¿¿²¾¾±¿»¯¾¾¯Á¾±À»­Â¿­¿¿¯¾¼²Á¾¬¿¾¯¿¾­Á¾³À¿®Â¾±Á¿±Â¾¯Å¼®¿¾°Ã¾¯¾¿¯À¾±Á¿°Á¿±ÃÁ±ÁÀ³ÂÁ³ÀÁ±Á¿°Á¿­ÂÁ°ÁÀ±Á¾¬¿À­À¿¯Á¿±ÂÀ³ÂÁ´Ã¿¯ÁÀ°Á¿¯Ã¾²ÅÂ³ÂÂ³ÈÂ¯Ä¿³ÃÀ³ÂÂ°ÅÁ°ÃÁ±ÃÁ³ÄÂ²Ã¿¶ÆÅ²ÆÃ³ÃÁ°ÂÃ´ÅÁ³ÂÀ²ÇÁ³ÅÄ³ÁÁ°ÄÀ´ÃÂ´Ã¾°ÆÃ³ÄÀ³ÆÃ±ÆÃ³ÃÁ¯ÆÁµÄÂ´ÃÄ³ÆÃµÁÁ³Á½¬À¿¬ÁÂ®ÃÂ´¿À¯¾¼¬¹ª®¤¡z~d~bui~wb{wf{{b|r_wi[wl]{z`|llnnzloux{wozb{l`{{f~uk~dbrfQlgWrbQrfYkw`tg]wl]uq[qi[olUni[kkStfWrnWqk_ut]uq`uu_toYwtSwuWuz_~|]tt]ukWuoSxzb{|g~{g{t_{rYxw[x{]{zbddnlo¨z³|¡¹¢Â«È³Ù»ä£¿ô³Æú»ÓúÇÜúÐßúØçúáèúáìúàïúçîúèóúíñúîõúò÷úð÷úñùúñ÷úóúúôúúõúúøúúøúúúúúùúúúúúúúúúúúúúúúúúúúúúúúúúúúúúúúúúúú÷úúöúúöúúôúúðúúðöúðúúòùúìôúíöúêóúéóúèñúäïúçíúãïúäíúãîúãîúÞìúÛèúÛìúÝéúßêúÜãúÛçúÚåúÛçúØãúÒáúÜãúØàú×âúÑÝúÊÙúÐÛúÏÙúÒØúÑ×úÉ×úÇÓúÅÕú¾Îõ»Èì³Éí³Äð¯Ãâ¬¿à©¾á¬»Ü¬Àâ©¶Ù¢³Î³Æ«¿§¸¤³­©| zwxzuulnf`~u`uw_zt`ru_wtbzzbuzWro[tg[wlUnn]rnSodWofYrdWok[on[li[tfWoiSknUobUlgUn_SkgWlfSnb[oo[oo`wtbxug~xg{l|qo|{gqbzxio~gzb|u]|o_zq`zr]uo]xxi~¤¦µ§±»°·Ã¯¿¾«ÁÁ¬¾À¯ÁÂµÂÈ»ÃÃ´ÈÄ¸ÄË¹ÌÉ¸ÈÅ»ÊÈºÈÇ¹ËÈ¶ÈÆ»ÊÆ·ÉÉ·ÉÊ·ÆÊ·ÇÅ·ÈÆ¶ÆÉ¹ÈÆ¹ÇÉ¹ÊÆ¹ÈÊ¹ÉÆ¸ÅÅ´ÈÆ¸ÇÉ·ÌÆ·ÈÆ¸ÈÇ·ÈÉ¼ÈÆ»ÇÈ¸ÆÆºÈÈ¹ÊÈ¶ÃÆ¸ÇÆ·ÈÇ¹ÆÇ¸ÌÂ¶ÆÆ¹ÇÃ¶ÈÃ·ÄÄ·ÃÆ¶ÃÅ·ÆÄ´ÆÂ³ÆÅ³ÆÃ·ÄÆ·ÂÄ³ÆÅ·ÇÅ¹ÆÃ´ÆÄ³ÅÆ·ÆÆ·ÅÅµÆÆ´ÆÅ¶ÄÄµÄÃ³ÁÃ´ÂÂ¶ÆÂ·ÅÉ¶ÃÃ¶ÄÇ¶ÅÅ¸ÁÁ³ÆÃ²ÅÆµÆÂ»ÄÂ¶ÁÂ²ÂÂ³ÄÅ´ÅÃ´ÄÁ³ÃÀ³ÃÃµÃÂ²ÃÀµÃÂµÂÁ±ÃÁ³ÂÀ´ÁÃ´ÀÀµ¾À³ÃÁµÁ¿³ÁÂ³ÃÀ³À¾¯ÀÁ´¿¾³ÁÁ´Â¾²ÀÂ®¿À²¾¿³¿»®¿¼®¾»±À½±À¾°Á¿¯Á½¯½¼°Á»®¾¿±Á¾°À¿³Á¾²Á¾²À¾±Â¿°¿¾®½À¯¿»³À¼®¼½°¿»¯À¾­»»°¾¼³»¼¯¿½°¾¾°Á¿³¿¿°ÁÀ°¿½¯¾¾°½¾³¿»¯½À®½º¯»½­»º®¾¾®½¾­¾¼±¾»°½½¬¾¼¬»»±¼½¬¿»®»½®¼¸¯¾½®»¼¬¹¸®¾»®¼»°¾º¬¾¹®»¿ª¾¹¯¼»¯»º­¼»­¼º­¹º¬¼º¬½¸¬¾¹®»¹¯¸»¬¾¹­»»¯»¸­»»¬»¹¬»º¯¼ºª·º­ººª¼¹­½¶¯º·¬·¶¬¼·©¸º¬¹»«º·®»·­¹·¬º¶«»·­º³©·¹ª·³«¸¹­»´®»º­º¹©¹·«¹¹¬¹¶ª··©»·¬¸µª»´¬··ª¶¹¨¸·¬·»¬·¢®ª´¬¯¬³¬²¨ ²ª¢²®µ« ³¬³«²®²¬¡²¬µ©µ¬¡´¯ ²ª´°³«³¬³­ µ®µ­¶¯¡·°¶¬³®¡³± ³©²®µ­¶¬ ¶­ ³®µ­¢·¬³­´®´¯ ·«¶­¡¸¯¡³¯¡·¬¤³¯´±¹­ ·®¡µ²·®¸°£µ°¡µ²¡¶±¥´²¢·±¢¶²¦·²¢·°£º³¡·¯¥·¯ ¹±¡·°£¸®¥»°£¸´¢¸²¢»­£¸±¢»µ¦¶³¥»´£»³¨·µ¤º³¡»²¥º³§»°¤»µ©º³¦¸³£¾·¤»µ¥¸³¦¼³¦»·¥½³¥½¶£¸µ¤º²¦¼³¹µ¦»µ¥¼³¤½µ¤º·©¼³©º´§¾µ¨¾·ª»¹¥¼´ª¾µ¦¼·¦¾¸§¾¸¨¾·¤½¶£½·¨½·¤¾º§»·©¾¶«¼¸©¾·©¾·¡»¶¨¿¶©À¹«¿»©½µª¿·ªÂº®»¸¨Ã¸ªÁ¹«¾¹«¿·«Á¸§Áº©Áº­Á¸©¾»«¾¹«¿º¨¿¹«Ã¹ªÀ»­Á¹¬ÁºªÁ»«À»ª¾¹ª¿¸«Á»­Á»ªÁ¹«Áº¨½»ªÀ¾¬Á»ªÀ»ªÄ»ªÀ¾«Ã¼²Äº¬Á¾¬Á¼ªÄ»®Â½­Â¹¬À½¬Ä»«Á»«Áº¯Á»«Á¾¬Ãº¬Æ½«À»®Â¼­Á½¬Á½®¿¾¬Ã½ª¾¾®À»®Á¼­Ä½«Ã¾¬Ã¾¬Ã»¯¾»¬Áµ¦¼·¤À¼¬½»«»´ ¶°°¢¦tqbx]n]~tUxn]|nUugYwbQq`MtkQwu[|dx`fbw`|inntoq{flY{bW|xf{g~n]uWMn_InUBk_Dg]QkgMqYSobOriOq`InUFo]Il`In[Ko[Ko_Ko`MulOugQrdMrdMtnQxqYwiUudKt`Mr`QqnQwuWwfUzfKtiMxiSzqO{|W~W[bd£l«t²|£»§ÈµÕ¸æÁîªÇù¸ÏúÂÔúÎÜúÒâúÙäúÚèúßëúãîúâñúåñúêõúëõúìóúí÷úìöúðøúîøúðöúðúúóúúôúúöúúóúúõúúúúúùúúúúú÷úú÷úúùúú÷úúöúúõúúðúúñúúðúúóùúî÷úëöúêõúçôúçõúéôúæóúãïúãïúßîúÞîúÜëúÚëúÚìúÝìúÜèúÚçúØéúÙèúÙãúÕæúÕäúÖãúÕãúÒàúÐàúÒâúÎßúÒÞúËàúÉÜúÈØúÇÙúÎØúÌØúÊÕúÈÕúÆÔúÁÒø¾Ð÷·Ìð´Æê°Èì®Âç¬Áß¥Àà¡¿Ø¥»Ø¤¸Õ¸Ñ¯É®»§· ¬~«x¤wwtnqikfdbx_{r_~nOtbWtnOrgQtkStnOqfMq`Qn[Mk_MndQniSn_Ml_Fl]Kk`Kl`MqbKo[Kn[Il[FnYFoYKkYDnWKdWMn_MtiYrn[wq_xn]zrg~zkwguY{iYxn`zzf|kz_nQzdYwfYzfOwbSug]zod~¬ ¯³¥µ¸©»´©¼»ª¾½ª¾º¦¾¼®ÀÃ°ÅÀ³ÃÁ³ÃÁ³ÇÃ´ÄÁ²ÆÁ³ÇÃ±ÆÅ²ÆÆµÈÂ²ÃÁ³ÆÆ³ÆÁ¯ÅÂ²ÈÂ´ÆÃ±ÆÁ±ÆÃ³ÆÃ±ÃÄ¶ÇÁ®ÆÁ´Å¿±ÆÃ²ÃÄµÅÀ­ÆÁ°ÆÁ²ÇÁµÆÁ°ÄÀ²ÇÄ°Æ¾³ÃÁµÆÀ²ÇÃ¯ÃÂ³ÉÁ³ÂÀ°Ã¾²Ã¿´Ä¾°Ä¿¯ÃÀ¯ÅÁ¬È½¯Ã¾°Ã»³Å½®Ä½³Ç¾²ÂÀ¯Ã¾±Ç¾®ÄÁ¯ÃÂ±Ä¿²Á¾°Ã¾­Å½²Ã¿²ÃÂ°Æ¿­Á»°Ä½¯Æ½°Á¾¯Å½­Ã»°Ä½¯Ã¾®Á¾­Ä»®Á»­Á¼­Á¾°Â»®Á»°¿¹¬¾»­Á½¬Ã¼­Á¾®Áº«Á¹®Ã¼«Àº¬À»­Â½¬¿»®Â»®Â»­À½¬Â¼®¾»¬¾»¬Á¹¬À¹«À·§Á·ªÀ¸¬½º¬¼¸§¾·«¾¸©¾·ª¾µ§¾¶©¾º«À»§¾·­½»©¾¸®Á·¬½ºª¾·«»·«¾·ª¾·®¾·ªÁ»©º·©¾·«¾¶«»¶¬¿´«À¸§»·ª¾·©¾¸©½·¬½¶©½¸¬¾ºª¿µ¦»·ª½¶©ºµ¬»·¨º¸«¼·¬¼·¬»¹©¾·©¾·¤»·¨»³«·µ¦¼¶¨º¶©¹µ§½³§º·©º³ª»³¤·´¨½³¨½¶§»·©»·«»·§¸³¦»³«»¶©»µ§¸²©º³§ºµª¸³¨»´©º³¥´²§¹³§»³£»µ«µ±¨º³§¹²¨º²§·µ¦»µ§¸°¤µ³£¶´¥·²¤¹°¥¸³¤¹¯§º³¦·²¥·­¥µ´£·³¥·²¦·²£¸²¤¶®¥·²¦·±¡·³¥¸®¦¶®¦·®¤¶³¤µ²£¸²¥·³¨·¯§·©¡¯³¥µ´¤±µ¤·´¡´¯¥³³¤³´¥¶´¥³´ªµ°¦²´£¶°¤´µ£·³¥µ³¤·³£¶²¤¶³§·³§µ²¦´±¢´µ¦´±§¶´¨ºµª¸²¤µ³¤µ³£·³¤µ´¤·³©·³£·´§¶µ¨·µ¤·´£·µ¨·³¥·¶£»´«·´¦ºµ¤¹¶¥·¶¥·¶¦·¹§º´§¸´¨·¶ªºµ«º³¥¶¶§»¶©¼µ¤·¶¦·µ¦¹¶©·µ«»·§»¶¥»¹ª¹µ¬º¶¨·´©¹¸ª¾µ­¼µ©»·©··¬»¸©½¶§»¸¬»¸§¹»©½¹ª¹´ªº¼ª»»¬¿¹ª»º¬»·¬¼·¬½»¬¼º©»»®¾»¯»¼«»»¬½»¬¼»®»¹¬¾½¬»»¬»¸­¾»«¼¸®¾»¬¼º°¾¹°¾¼«¾¼°½¼°¼¾¬¾¾«½»®½½¯¾¼¯¿»ª»¼®Á¼¯À¿¬¾¿±½¾­ÀÀ­½¾®Á¿­Á¾­Á¼¯À»¯¾¾³Â¾­¾»¯Á½®Á¿°½Á±À¼°Á½¯¾¿³Á»²ÃÀ¯Á¿°Á¿¬Á¿°¾Ã²Á¾¬Á¾¯ÁÀ±ÁÂ®Ã¾¯Á¿±ÂÁµÂ¾¯Ã¾³Á½®ÃÀ°ÃÂ³Æ¾±À½¯ÀÁ³ÁÁ²Á¾°ÄÁ²ÃÁ³ÆÁ³ÃÁ²Á½²ÃÀ³ÆÄ·ÄÁ°ÇÁ³ÄÆ²ÆÃ³ÄÃ³ÃÁ±ÂÁ²Ã½¶ÆÁ±ÃÁ²ÅÃ±ÄÄ±ÅÁ²ÄÂ³ÄÁ±ÅÁ±ÅÃ±ÃÁ¯ÅÅ·ÃÃ³ÆÂ³ÄÂ¯ÃÃ³ÃÃ³Â¿¯Á»©À¾¬¿¿­ÁÂ±¾¿©½±¥®®¬§¢kzffwkw`obxx_uq_ukWulUxzb{kooroowz{z{t|kn`{qir{oodu_UobSi`Mnb[ll]rl[ni[tz[uuYubWqbSqbQogYofUqlWrq_rlYqn]ul[tqWwtYx{_wzbto[xnSzlYzo_w{_zu]zn]uz]zu_w{_{]~gflo©u·½¤¿¬Ë´ß¡¼ê©ÃõµÈú»ÐúÇÜúÒãúØäúÛçúàëúæîúèòúèóúëôúìõúï÷úïôúñøúòúúðöúôúúöùúöúúöúúöúú÷úúúúúøúúùúúúúúùúúøúúúúúúúúúúúöúúúúúúúúøúúöúúòúúóúúóúúñúúí÷úðøúî÷úï÷úîõúìôúçóúäïúáïúàíúàìúÜíúäëúáîúáíúßêúÝèúÜêúÙçúÙæúØçúÛçúÙãúØâúÖâúÓàúÖßúÓßúÍÛúÈÛúÌÛúÓÚúÓÛúÔÛúÑÙúÊÕúÇÓúÅÓúÃÒøºËó¼Ìó·Ëõ¸Çë¯Ãè¬Àç¬Àßª¼Ü¤¹Û¦¸ÕµÈ¬¾§»°«¡~¡x{wturnnlfu[{l]wtbqt[ur[tt`ot]un[td]obQng]oo]ulUqiSok[qkWnl[qk]qkWqi[ibUugOliWkbUobUnfUog]oobw|i{ixxi|wo~quk|ub{kb{|l~uqgtbnb|o[|q[{l`xtl~¯«´¦³½¬»¾¯½À³À¾³ÅÃ«ÂÁ²ÁÃ±ÃÁ·ÅÈ¹ÅÈºÈÈ¹ÊÈ¸ÈË»ÈÉ¹ÊË´ÈÆºÈÆºÉÈ·ÇÈ¸ÊÇºÈÇ¶ÉÊ»ÈÆ¶ÇÈ¸ÈÉ·ÈÆ·ÆÈ·ÈÄ³ÈÈ¹ÈÆ·ËÅ¶ÃÆºÆÆ¶ÇÈ»ÅÊ·ÈÆ¹ÆÉ¹ÈÇ¹ÉÆ·ÈÈ¶ÅÆ¶ÇÈ¶ÊÇ³ÈÈ·ÈÅ¶ÅÈºÇÃ¶ÈÆ¸ÃÇµÇÃ·ÅÅµÃÅ´ÈÅµÁÆ·ÇÃ´ÆÆ·ÃÄ¸ÈÂ·ÆÆ¶ÅÅ³ÅÅµÆÈ¸ÊÆ·ÆÂ¸ÇÇ¶ÇÃ³ÄÂ¶ÅÃ³ÂÆ·ÅÃ¶ÃÂ¶ÅÆ³ÄÅ·ÅÄµÅÃ¶ÁÂ¶ÃÅ´ÄÅµÂÂµÆÁ³ÂÂ´ÃÃ´ÅÅ±ÆÂ´ÃÅ¶ÃÁ´ÄÁ²ÄÃ³Ã¿³ÃÂ³ÃÂ°ÂÃ³ÅÂ³ÆÁ³Á¾µÅÄ°Â¿³ÂÁ³ÂÀµÁÁ±ÁÃ¯ÂÁ³ÄÀ°À¾°ÂÃ³¿¿³¾¿±Á¿°¿¿°¿¼°¾½¯Á¼°À¾¯¾¿°Á½¯¾¿¯»¿³ÂÁ±¿½±½¾±¿¾¯¿¿³¿º¯Á¾®¾Á³ÀÁ²ÀÁ¯Á½²À¼³Á½°Á»¯¾½¯À¼°¾Á¯»¼±Á¾³¾½¯À½³À½±¾¿°À¼¯¿½³¾»±¾½®¾¼²¼½­¿»®¼¼®¿¼³¼½¯¿¼®¼¾­Á¼°¾»±½½¬½º¬»»®¼¼°½¹¯º¹­º¼¬¿¼¬½¸¬¿½­»»­ºº®¼»®¾¹¬»»­¼·²½¼«¹¹­»¹ª¿¹¬½¸¬½¹®¹¾¯¼·¬¼·¯¸¹­»·­»»¬¹º¬¼¹¬»º¬»·¬»¸©¸·«¹·«¸¶«·¹­··¬ºº¬»¸ª»º«»¹ª¶·­¹·°»¹«¹µ¨º¹¬»¸¨º·­º·¬º·¨µ·­¹º§¹·­¸·¬·¶§·¶©¸·¬·´¨º·«¶µª¶£¯¨ ´«±­³®³«°« ²¯ ´«´­³«µ® ´¯²­°®³¯´®³ª´¬³¯´®¡µ°µ«³¬³­·­µ¬¢±«³¬³®·°³ª´¬¸­´­¡¶°¶¬ ³­¶®¢µ­·®·±¡¶°¡µ®µ®·« »®´®¡·­·¯¢´® µ³¶°¢³²¡·®µ±´±¡·° ·²¸±¤¸®¡¹° ¶¯µ²¢µ° ·³¡¸° »µ¢¸±¢¸²£»¯¡º¶¢»²¢¹´¢·²¢¸±¡º´¥ºµ¡¸µ£»´¥»²¢¹´¥·³¥»°¤¹²¤¹·§ºµ¢·¶£º³§»³§º²¥º²¥»¶¡¹³¤»µ§¸µ¤»¹§»´¥º·¡º¶£¾´¨º·¦»¸§»·©¾·£¾·©½·¢½º¦¾¹©¾º§¾ºª»¹§½¶¬¾¸§¾´©»·§¾¶©¾º©½·¥¾»«¾»©À»«À·©À¹¤¾¸§Á¸©¿·ªÀº§Á·®¿·«¾º¬»»¨À½ªÁ¸«À¹ª¿»«¾º¬Á»§½º¨À¼¥¾»¬¼¸«½º©¿»¨Â·©Á»©¿ºªÀ»«Ã»§¿·©Á¼®À¹ªÂ¹«Á»¬Á»­Ã½©¿¼ªÁ»ªÁ»«À½®Ã¾¬Á¹®Á»©À»­Ä¼ªÂ»¬Â½ªÂ»¬Á¿±À»¬Á¼°Á¼¬Á½¬Â¾¬Â¼¬Â¿«Â»®Â½®Á½¬Ã½°Á»ªÃ¾«¿»¬¾¸§¾·¦½¹©¼»«¾º§·°³§«¡~bt`z`{_t[{dUxbMwfOq`Mr[QudQxuYz]bng|g~dnqnkgub{nUz`Uzodwol~dOrQDgOFg[DgYOogInWMl_MinSq`Mq_IlYKl_IkbFnbOnbKrfFtgQwgItgKukUwnMxtWwqUtdKtdOqgMtqSrqOwgKwiQtnIzxSxrO|{QU`f£l®w»~¥¿©ÍµØ¼å¥Ãõ²Êú»ÔúÃÕúËßúÖäúÚçúÛèúßìúàîúåîúéñúåòúéñúêöúèõúéôúíöúîõúìöúîøúï÷úñùúòúúôúú÷úúñúúöúúóúúóúúôúúùúúøúúúúúúúúøúúôúúñúúòúúñùúðùúïùúïúúíöúîõúêöúèôúèõúäòúãòúÝðúÝìúÛíúÜëúØêúÝéúÛéúÛæúÚæúÕéú×æúÕäúØäúÕâúÒåúÓáúÓâúÓàúÐàúÌÝúÊßúÌÜúÇÚúÈÚúÊØúËÙúÌÙúËÖúÌÖúÄÖúÄÒú¾Ïú½Íö»Íñ¶ÌóµÈï²Çê¬Àä¨¾Ý§½Ô¡·ÕµÐ°Ì®¾©µ §x¦w tqlqkigg``x]qUzlOtdMugOqnQtfSqbQufOo[FiY?kWIkdMlbIk]On_OnbMrbDt`Mq`KidOrYIlYOi[Dl[Il[InYFi[Ok`Uln`wx_|t_{qgzbzkfw[|lQwgYw{i|ibqYziUwgSxgUwkUxk_zxl£¥«¬µ¡·´¥¹¼­À¿¯Ä½¬¾¾¬Á»«¾¹©À¼¯ÃÁ±ÅÄ²ÇÃ²ÆÃ´ÇÃ²ÄÁ²ÈÃ±ÇÃ³ÆÃ¶ÊÃ²ÅÅ³Ç¾±ÆÃ²ÆÆ±ÆÂ³ÈÃ¶ÃÃ²ÅÁ³ÅÃ±ÃÁ³ÇÀ³ÇÃ´ÇÃ²ÇÃ²ÄÁ±ÄÃ³ÃÀ·ÆÀ³ÄÄ°ÃÁ³Æ¿²ÈÃ³ÆÁ´ÇÂ³ÅÁ³ÅÁ®Ä¿³ÇÃ²Ã¾¬ÄÀ°ÃÀ³Ã¾­Å¾¯Ä½®À½°Ä¾®ÆÀ³ÆÁ°Ä¿°ÃÂ±ÆÁ®Á½°Á¿³ÅÂ®Ä¿®Ä¾°Ã¿°Ä¾®Ä½®Ã¾±Á¿¯Á½®Ä½°Á½¬ÅÀ®Ä¾°Â¾±Ç»­Ãº®Á½­Ã¾®Á¾¬¿»¬Â½©Á¼®Ã»­Á¹®Á»¬Á¼«À½¯Ã¼­Á¿­À¾®Ãº­Â¼­À½¬Â¾­Â»®Àº«ÁºªÀ¼¬Ã¹®À»¨½·ª¾¹¬Á»¬¾¹¬¿»®Á»©¿»«¾¸«¾»«¾¸«¾¸«¾·¨»¸«À¸«¾»¬¼¹«¾º®½·«¾»«¿»§¾·©¿¹«À»¦¾¸¬¾¹­À¸ª¾º¬Á¹§½¹ª½º©¼·¬¾·ª½·¨¾¸«½¸ª¹¸©¼º¦»¸©¾¹«»´¥¼·©¾·§»¸¨¼·¨¾µ«¹¸§º¶©½¶©¸·«»¹«¹µ¨»¸¥»·§¼¶ªº¸¦º·§¹´«»¸©¸´¦¸µ£¸¶¥»µ¨··¦»³¥¹´©»¶§¶µ«»³¦º³§¼´¦»µ¦¸³¤º´¥¹³¤¸´§º´§»´¤¸²¦¸³¥»²§º²£¸³§º³§µ³¥¹µ¨»³¦·µ¤º®¥¹´§·²¥¹³¦¸±§º³¥·´¥¹²¥´±£·´¦»³¥¸²£µ³£¶³£³±¥³²£»² µ±¡·³§·°£¶±¢´°¦»¯£µ³¤·²£µ°¤´­£­³¥³³³µ¡¶³¦·³¥µ¶¥³³¡·­¦µ³§³³¢¹µ¥¶±¡³°¤µ³¦³³¦µ´¨¶±§¶´¤³²¥µ²£·³£¶¶¤·¯¥·³¤¶´£´³©¹´¢³²¢¶±¡µ³ª·±¤´³¦¶³¢¸´¦·´¥¶´©··¦·³«¹´¥¹´¤¶³¦¹±£º¶¦µ³¤·³¦º¸¥¸³§¶²§·¶¨µº¥·µª»µ¥·¶¥¶·§»·¥¸³¥·µ¥·º«¹¸ª¸µ¥·¶«ºº¨¹¶¬¼´©º³¨·»©¹¹¥»·«··¥»¹ª»¸§¹¹©¼·¦¼»©¸¹ª¾·¬»º§»¸§ºµ©ºº¨¹·¬»¾©¾¸¬»º©¼»«½¸«½º§¼·°½¾¬¿¹«»¹¨½¹«¼º§¿»«º»«¼»¬½½ª¾»¬»¼ª¾»®»¼¬¿»­½½­¿º­»¾®Á½«»¼­¿»¯¾»®À¼®¿»«¾¼­½¾­¾À¯Á¼¬¾¼¬Â»¬¿½¯Ã»¬¿»¯Á¿¬Á¾®Á¼¯Àº°Á¾¯¿Á°Â¿®ÁÀ¯Â½­ÀÂ²Ã¾±ÁÁ°Ã¿¯Â¾°Â½³ÁÂ®Ä¿¯ÁÁ²Á¾¯Á¿®Ã¿³Ã½¯Á¾­À¿¬¿À°Å¾²ÂÁ°Á¿¬Ã¿­ÁÀ³Á¿±ÁÂ­ÃÁ¬ÂÁ³Å¾­ÁÂ³ÂÁ´ÃÃ²ÄÁ¯ÃÂ³ÁÃ³ÃÁ³ÃÁ³Ã¿¯ÅÃ°ÅÁ±ÅÁ¯ÃÁ²ÁÄ±ÂÃ´ÄÁ¯Ã¾²ÁÁ±ÆÃ³ÁÁ³ÇÁ²ÃÃµÃÀ³ÃÁ°ÃÀ­ÇÂ¯ÁÁ°Á»­À¿°»Â±¾Àª¼¹§¶±±¦¦u|`iqiu`|o[xkUzoUuiSuk[zu]~~`itzoin{xtqr{]|nWxi`wtzx~{oziWnWOo[Of_QkfQngYldSnkWlu]ukYokSnkUnbQniSqi[nl[qrStq]uoWwlWuu`|]xw]wn_tnQxnYwqWwzSuw[zu[zw_{|[|{]z[]fk¨w³¡¾¥Ç¬Õ·ß¢¼ç¬Åú·ËúÁØúÌÝúÐãúØçúÝìúßíúáíúèñúçïúëðúíóúëõúïöúïõúí÷úï÷úïöúòøúòöúñùúöúúõúúõúúöúúöúúôúúóúúôúúôúúóúúöúúùúú÷úúøúúõúúøúúôúúôúúôúúöùúöúúôùúôúúòöúïúúíöúëôúìõúèòúâñúâïúãðúßïúáïúàíúßìúâíúÝêúÝíúßçúÜéúÜåúÚèúÛäúÙâúÙäúÙãúÒáúÒßúÐàúÐßúÒßúÐÛúÌÛúÐÙúÏÛúÑÙúÑÙúÎØúÌØúÆÐúÆÒúÃÑúÀÒöÂÍùºÍó¶Éï¶Åí°Âã©»Û¨»Û¥µÕµÊ¬¿ªµ¡­ª {txzqotlnb|]|x[ut[uqYwuYon]okSqoWokSq`Ql`UqiWoo[nlUkgUniUrqSqfWriWknWqdUlb[niQoiWokUkdQld[okWqqbzwk{kii~o~{nlw]|o[xxgztudwb{uUzq]{q_|qd{zn{ ±£ªº«·¼«¼¿²Â¿³¿Á³ÁÃ´ÄÃµÁÁ°ÅÁ´ÆÅ·ÆÇ´ÇÉ¸ÇÇ·ÈÆ»ÈÇ¶ÈÈ¶ÈÇ¹ÈÇ»ÈÈ¶ÈÆ´ÌÊ·ÈÉ¸ÉÂ·ÈÊ¸ÆÈ·ÈÈ¹ÉÈ»ÆÅ³ÆÇ¶ÃÆ¹ÉÈ¹ÆÆ¸ÇÈ¹ÇÈ¸ÆÆ·ÇÅµÇÈ¹ÇÆµÈÃ·ËÈ·ÇÈµÅÊ·ÉÇ·ËÆ¸ÆÉ¶ÈÅ´ÆÈ´ÅÄ¶ÆÆ³ÇÄ¶ÆÇ³ÆÄ´ÂÂ³ÅÆ´ÆÃ¹ÆÃ¶ÇÇ¶ÆÈ¶ÅÆ³ÇÃµÅÆ¶ÆÆ¶ÆÅ³ÇÆ·ÄÃ¶ÄÂ·ÆÃ³ÃÁ³ÅÅ·ÃÂ²ÄÃ³ÆÁ°ÃÃ¶ÃÆ³ÃÃ·ÅÁµÇÃ³ÆÂ´ÆÃ³ÃÂ³ÂÁ´ÃÂµÃ»¶ÃÀ³ÃÁ³ÀÁ²Ã¿´ÁÁ³ÀÀ±ÃÁ´ÃÃ±ÂÁµÃÂ³ÁÂ´½Ã°ÁÂ¯ÃÀ±ÂÃ³À½³ÁÀ°ÂÀ±Â¿´ÀÂ¯ÁÁ°Ã¾³ÀÂ²Ã¾±À½³Á¾¯¾¾°Ã¾²À½­Â¿¬Â»®À»®¾À°¿¼³Á¿°À»±Á¾­¾¿±Á¿¯¾»¯Ã½°½¾¬Á¾²¼¼°Á¿¬¿¾°À¼¯¿¾°¿¿°¼½¯¿½°À»¯¼¼°¿¾¯¼¾®¿¾°À»±¼¼®¾½°¾¼­¿»¬¾¿±¾»­½»¬¾¼­»¼®¼»°¿»®¾¸­½¼®¼»®¿»­¼¹°½»¯º¾®¾»®¿¼¨½¾¬ºº¬»¸¬¹¼¬¾¾¬¼¹­¸·ª¼¸©¹¹ª»º¬¹»®¼·¬»¾­»·¬¼·ª·¸¬¸¹¬»¹¬¼¸«¿·­º¹¨ºº¬º¸¬»·¬º·­»º­·¹©·¸¬½¹©··¬»·«·»­¸¸ª¼¸¬·¹ªº¹©»¶ª¹·©»·¬¼º©ºµª¶¸§··¨¸·¨¶¹¬¸µ©º·«··¬¶¶§·¸¨·¶¬¸·©·¶¨·¶¨·¶©·£¬«²­´¬±¨³°±¯¶­³­µ¬³«¯« ´ª¶®²¯´­±¯´«¡¶¬³­´­²¯µ¬³¯ ´± µ¬´¯¡³¬´°´«·®´­µ¬µ©º®³° ³¬´° ·¬ ´±·¯³± ¶®µ¬²°µ¬¡·®¶²¶° ¹±¶²·²¥µ® ·®³¯ ·³¡º³º®¥·®¡¸²·²¡·²¡¸°¢¸±¢¶²£·³ ¸®¡¹³£¹µ¡·µ¡º³¥¸´§·³¥·°¤¸±£¸´£·³¨»´£·³£¹²¥»´£»´¥¹³¤¹µ¤»·§¹±£¹²¡º³¥»³¢¹³¤¸·¥¼·¦»´¨¼µ¦»³£»µ¤Á¸©º´§¼µ£º¶¦º·§»´¨»¸¨¿¶©»³§½º¥¾¶§»µ¨»·¥½·§¾¹§¼·¨½¸§¼µ¦»¶©Àº¦»¹¥À´¨¾´§½º«¾·«¿·§»¶¨¾»©¿·©¼º¨½·­¾¸«Á»ªÀ¸¨Á·¨À¸ª½»¬Á»§¿ºªÀº¨¾¸ª¾º«À¸«À¸¬Á¹ª¿½¬Á¼§¾·©Áº©Áº­¾µ§¿¸ªÃ½©À»¬¾»¬¿ºªÀº§À¹©Á»«¿»¬Á¼­Ä¼ªÀ·«¿»¨ÁÀ¬Ã»¬À»«Â¼®Ãº©Á½§¿»«Ã»«Á¼®Â¾®Á½¬Å¹ªÃ¾¬Â¼¨Ã»«Á»®ÁÀ¬Ã½­Ã½¬À¾¬Á¼¬Á½¬Á¹¨¿·¦¾»§¿¸¨»´¢·¬­¤¥tz_q[d~d|_{iW{iOt`MqdIt`FtgIznU{tbfnktgu_kqltggxblU{_QtgUwwg{fw`]tQIgS?iUBkWIibIkSIlWKqgKifMqWBqYFnbKi_Kn_QnfIr]Mo`OtgOtfMtnQxtOxlSxlIudMo`ItgIudKwrWtoKtiSuxOzoU{rW[[do¨t¼~¥Ä¬Ï·Ø¼èªÆö±Êú¾ÓúÅÛúÌâúÕäúÙçúßëúßíúàëúáïúäïúäðúèñúæòúçóúêõúéöúéöúéõúë÷úîøúðúúîúúïúúðúúñúúñøúôùúòúúîùúìøúïøúñúúñùúñúúò÷úðúúðúúðúúðúúòúúðúúñøúðùúîùúí÷úíõúêôúåõúåóúÝñúâíúàîúÜîúßëúÝíúÜèúÝêúÛèúÛèúÙçúÖäúØäúÙåúÖãúÒáúÕâúÔäúÒâúÌÝúÏÛúÑÜúÒàúÎÜúÌÙúÌÙúÊØúÈØúÊÖúËÖúÌØúÅÕúÅÕúÃÔúÁÐú¾Îö½Îö½Îõ¹Èñ²Èë°Æã©ÂÝ©ºÕ£·Ö´Ê°Æ¨»£©{  wqroongii|[{z_tU|rO{nMu`KqdIodIl_Iq`MnbFn`KnYDg]Fg]Kl]Il]KkbMq`Ik_Ml[IndMn`Ik_DlWFk`Kk]Fn[Ml]KlbIqdUtx_{|gk{glfuk{`nW|dSwd[wg|ix`qY|nWxiWunUxiUzl_~{k¬¥®¡³´§¹»©¾¾«»¿©Á¼­ÁÁ¬Á»ªÃ¿­Â¾³Ä¾­Ä¾³ÆÁµÆ¿®ÆÅ´ÆÃ¯ÈÂ°ÃÁ±ÅÄ´ÈÃ³ÆÂ´ÈÃ³ÇÆ´ÈÃ¶ÇÁ°ÆÀ°ÃÃ²ÄÁ±ÊÁ®ÄÀ³ÄÁ³ÅÄ±Ç¾±Ä¿²ÄÀ°ÅÃ±ÅÃ°ÅÃ°ÅÁ°ÆÀ³ÆÀ¯Ä¿®ÆÁ²Æ¾°Å¿¯ÄÁ²ÆÀ²Ã¾²Ã¿¬ÅÁ±Ã¾¯ÄÁ¯Æ¾®Á¾²Ã¾®ÁÀ®Â¿¯Å¾¯ÃÁ³Å¾±Ä»®Ã¿³Æ¾°ÄÀ¬Ä¾­Ã½¬ÁÀ­Á¾°Ã¾¯Ä½«¿¾°ÆÂ­Ä¾«Ã½®ÃÁ¯Ã½¯Ã¼­Ã½¬Á¾®¿¿®À¾«Ãºª½¾«À»§Â½ªÃº­¾»¬À»¬À½¬Á¸©À½¬Á¾¬¼¾ªÁ¾­¿½¯Á¼­Ã»­¿½®¾»­¿»®À½ªÂ¾ª¿»¬Â¹¬¾¾¨Á¸¬½·«Á»¨¾¸¬¿·¨¾»«¾·«À¹©¾·©¾¸ªÀ¹¬½·ª¼µ¬Á·ª¾¹¬¾¸©Á¸ªÀº¬¾»«»¹©¾ºª»·ª½·§Àº¬¼¸¬¾·¨¼¹¦¾·ª½·¨¿·§½¸§¼¶¨¼µ©¾·«»·¨½·§»¸ª»·¥¾µª»³§»·¨¼·©¾·«»¶¨½·©»µ¬½¶§½µª¼³¦½·¨½´ª½´§º·§»´ª¼·¥»µ§¼µ©ºµ¤»³§½´¦»·¥ºº£º³§»·©½³¦º¶¦·³ª¸·§·³ªºµ¦º³§»²¦»²¥¸´§·³¨·³¢º³¦·³£¸³©¸³¤´±¤¸³¦¸³¥·²¦¶±£¸´£»²§º²¥·³¤µ´£¹³¥»²¥³³¤·´¦¸°¤¸±¡·°¢µ± µµ¥¸®¥µ°£¸´¦¶­£µ°£´¬ ´°¥·¬£µ¯¢µ¯¡³±¥·« ¬±¢³±¡³³¢µ³¤²²¢µ´¦·³¤¶²¤¶±¤¶°§´± ·³ ´³£µ²¡¹³¡µ¶£³±§·¶¡µ³¤µ²£³³¤¶¶¦¶±¢µ´¢¹¶£³³¤¸±¤´³¥µ´¤³³¦·¶¢·³£µ³§··¤·³¤¶³¶µ¤¹µ¥¶µ§»³¥²µ©¹³§¹´£³´¥¶µ©·¸¦·´¥·¶¨½³¥·¸¡¸¶¦·´¨¼·¦·¶¨¹µ¨·¶§··§º·«¼º¦·¶©»¸¥¹º©¹·ª¹¶ªº¹©»¸¬··ª¿¶¦¹¶¨¹·ª»·ª¹µ¤·¶¬¹»¨»ºªº¹«¼¶§º¹«»·«¾»«½¶¬¼¹­½¹¦¾¹¨»º¬¾¹«¼ºª»¸¬»»¬¾»¬»º¬¿¹¬»º«¾»­¾»«½»«½»¯À¼¬½»ªÀ»¬Á¼¬¾¾«½¼¯½º«¼»®Á»®½º®¾½®¼½¬¾¾®¾»®¾»®À½¯¾½²¾½¯¾À¯¿»°Á½¯¿¾®½¾¬Á¼¬Á»®Á¾¬Á¾°À¿¬¿¼°Ã½±ÃÀ®¿¿±Æ¿³ÁÂ±À¿®Â¾¬Á½®Ã½±¾À¬Á¿°ÃÂ®ÄÀ³ÀÀ°ÁÂ¯Ã¾±¿Á­Á¿­ÀÀ¯Â¿¯ÃÀ°ÁÁ¯Á¿³ÃÃ¯ÂÁ¯ÅÁ²Á¿­ÁÃ±ÃÂ±ÁÀ±ÂÁ¯ÃÃ®Á¿¯ÃÂ®ÃÂ³ÆÂ°ÂÁ°ÄÀ°ÂÁ±ÃÃ´Ä¾¯Â¿±ÅÂ¯ÂÁ³ÅÂ±ÄÃ²ÂÂ±ÂÂ±ÃÂ³ÆÁ²ÄÁ¯ÆÂ³ÄÃ³ÁÃ­ÃÀ°¿À­Á¿¬¼»©»·ª¹´¡·­¬§§uiofltf|q]zq]wg]wnUroWww[w`{iowouk|txo|n|kui~k]xk`wobw~iz|lukYu_Sk`Mn]OobSifSn`Qnn[roUnl[ogOqgQqdSnkWrlSoiYukSooUuoYzn_u]{z`uxYxzYxtUunUqoOwwYw|_znWwwWxz]{|`fik¬q¶¾«Í­Ö¸äÁï¯Äú¹ÐúÁÓúÌÛúÒáú×çúßèúâëúåìúäïúãðúçñúëõúéðúíòúêôúíóúîõúï÷úñøúïøúòøúðúúóúúöúúõùúùúúõøúöúúöúúöúúúúúøúúúúú÷úúùúúúúúøúúúúúøúú÷úúõúúöúú÷úúöúúôùúòùúðøúïøúì÷úéõúéôúéôúçóúåðúãñúâïúàðúàîúàëúàîúßéúÛèúÜéúÛæúÜèúÙãúÛæúÚäúØäúØáúÒäúÓâúÕßúÕÝúÓÞúÕßúÖÜúÓÛúÐÛúÒÛúÏØúÎ×úÏØúÌÕúÈÓúÉÒúÆÓúÆÒúÄÍúÄÏùÂÊö»Ìñ³Æì³Ãä¬¼Ø¥¸Õ ´Î®Ëª¾¤¬©z z¡wzwtqoiibxubxu[un[qoWqiSngSqlYoiUlkYq`OkfMngWkiQngSkgSlkQlkWobWtiWonUqiUodQqoSnkSnfSofUnfUqifuiunluik~kgo]zo_wn~o`zkxd|wdxxb~x`{qi~{n¥£®¤®¹¨·½±¾Å­¾Á³ÄÃ¯Ã¾¬¾¿¯ÀÅ¶ÅÇ·ÆÉ³ÇÅ´ÃÃ¶ÃÆ·ÅÇ·ÆÅ³ÆÆ·ÈÆ·ÈÈ·ÆÈ·ÇÇ¸ÈÊ»ÉÊ·ÈÆ¹ÊÆ¹ÉÈ¶ÇË·ÉÆ¹ÇÈ¶ÆÆ¹ÆÆµÆÆ·ÈÇ¶ÊÄ·ÆÇ¶ÆÇ·ÈÆ·ÈÆµÈÈ·ÆÄ¶ÇÈ¶ÃÇ¶ÆÆ¶ÆÅ´ÄÆ¶ÃÂµÆÆ´ÇÂ³ÃÂµÇÆ³ÃÅ³ÄÅ´ÆÄµÅÆ·ÈÃ·ÆÅ´ÃÆ³ÆÆµÅÆ±ÅÄµÆÅ´ÄÆ¹ÈÃ³ÆÆ³ÄÄ´ÃÄ³ÆÅ´ÁÂ·ÂÃ¸ÆÃ´ÁÁ´ÆÆ²ÄÂ¶ÅÅ¸ÆÇ³ÃÆ´ÅÂ¶ÃÁ¯ÂÁ²ÂÁ²ÂÃ°ÃÃ¶ÃÁ°ÃÁ²ÄÁ°ÃÃ°Å¾¯ÂÂ¯ÁÂ³ÃÂ²ÁÂ±À¾±ÁÃ³ÆÃ³ÅÂ³Á¿°ÄÅ³ÃÃ³Â¾¶ÂÀ³Á¿³Ä¿­ÁÁ´À¾µÁ¿³Á¿³ÀÁ®ÀÀ­¿¿¯ÁÀ±Á¾¯¿¿¯Á¾¯À¼°Á¾°¾À¬ÃÁ±Á»¯¿¾³Á¾°Á½²¾½±À¼­¿¾¯¾¿³¾»°¿½³À¾¯ÀÂ±¿½²Á¼¬½¿­¾½¯½»¯Á½¬¾¼°»¾³Á¼°½¼¯¿½¯¼¿©¼º¯½¹¬¾¼°¼»¯¾·®¿º¬À»¬»»°¼»®½¼­¼¿°¼¹®½½¬½¾¯¿º¬½¹¬»¾°½»®»¹¬¸¼¬»»¬»»¬½¸­»»¬¼¹¬¹·¨º¸­¼¹­º»­»¹­»¸¬¼¹¬»·­º¸ª»¹¬¸·¬»¸©»·¬»·©º¼¬»»¬¹µ«··©»»¬º¹¬»¶®»º©·¸¬»¸¬¸·¬º¶¬»¶¨¹·¬¸»­·¹®º¸¬¸·§º´¬¹¸¬¸·¨¹·§µ¶¥¸µ©»¶®··§¹¹¬¹´©¸·¨¹¶«·¹¨¹´ª»´¨¶¶©¸·¬»£¬©°­²®µª¯¬³¬°®²®±«³¬µ¬³«³¬³¬´¯³°³®³®µ­´¬³®²¬³°·¬·¬µ­´° ³±µ«³¬µ² ³­¡³¬´® ¶¯µ¯·­´®¡·°¢´® µ° ³®³²¡·±¸¬µ°¡³°¸¯³±¶¬µ³£¸°¤·®»°µ± µ°¤¸¬´²¸²¡»°·®¡¹¬¢·´¢·³¡¹±¡º²º±¦¹²¢·³¡·°£·µ¡¸µ¢»±£·´¥·²¦¹³¤º³¢½³¢¸µ¦»°¥¸³¢·µ¢»µ¦»µ§º¸§¼´¤¹¶¦·µ¥»³¥»¶¦»´¦¹·§¼µ¥»´¥»·¦½¹¨¼´£»³¤¼¶ª¼·¥¼¶¤¹³ª½¹§¼´§¼´¦¶·§¾»©¿·¤¼·ª¼·§¾¸§»·§¾¹©¾¶§¿¸§¾¹©¼·©¾¶«¾·¨½¶¨Á¸©¾·§½¼©À·ª¿º¥¿º§¾¸ª¾»¬Á»©½·¬¾º©Á¼«¾¹¨¾¹©Á¹ª¾º¨¿¸¨Á¹§Â»§¿º©À¹©¾º©¿º§¾¹ªÀ»©Á¹¨¿»¨Á¸«À»¬¾¼©Á»¬Á¹ª¿¹©Á»©Áº­¾º¬À¹¬À»­Ã½«Á¾¬Á¹«Á¹­Ã»¨¿¾¬À»¬Â»©½»­Ã»ªÁ¾©Á½®Á¼¬Ã½¬Á¿«ÁºªÁ½­À¹«Á½¨Ã¼°Â»¬Âº¬Á¸ª½µ¤»²¢´¶¢¹±µª¬§«wxft`wbz_qW~nOxgOudQtgMqfOtnUxnU{nUzbglz]o]zoqntftb~x]|kUu]Sx]OrlYqq]xdUrUIiUBlO?iUIk[FiYIiYIibIi`SlgMo[Kl]Io]IkfIl`MnYIo_MtbIqiOtxUxw[wnSxgQunOtiIrbFtfMttUuoKxfIwkIzuO{|U_d¦r®tº£Ä¬Ò¶Ü£½í©Á÷µËú½ÓúÅØúÌßúÔáúÜèúÝèúÝêúáëúàðúãïúãîúäðúæòúèòúèõúéõúéõúîöúïöúðöúò÷úñùúò÷úðøúòúúòùúðùúðúúòúúóúú÷úúôúúôúúöúúôúúòúú÷úúõúúõøúõúúöúúóùúòúúðùúîøúï÷úìõúêõúë÷úèôúæðúåðúâôúàïúáíúÝðúÛéúÝðúÝëúÙèúÖçúÛéúØâúØåúØäúÕâúÖáúÕàúÓáúÒäúÏÛúÐßúÒÜúÒÞúÏÞúÐÙúÐÙúÎÙúÍÕúÊØúÈØúÌÔúÊÔúÇÓúÆÖúÃÒúÃÑúÃÍùÀÒúÁÌøÀÊô½Éñ·Èí±Ããª¾Û¡¸Ï³Ë®È¯Ã§±¡wonwqkigd|[~tW|lQwiStgMq`Ko`MkfFnYDi[InbIk[KoWDkYFfbIl`FlYIg[DlbIobIkYMn`Fi`Mo`Fo`In[Kl]Kn_Ko[Il_]qxf|k|dwd~dxk~gx]dOx_Oti]w{d~{`wf{oWzgYulUzgQwiWzoY|~x¨©¯´¸ª¹¿®¿¼¯ÁÃ«Á»§À¹«¾½¬Ã¾®ÁÃ´Å¿°Ä½¬Ã½ªÂ»®Á½¯ÄÀ²ÇÄ²ÄÁ´ÄÁ®ÆÄ³ÄÃ°ÅÄ±ÅÃ³ÇÁµÄÁ³ÆÂ´ÃÃ³ÅÁ²ÆÀ­ÃÃ¯ÇÃ±Æ¿°Ã¾°ÆÂ²Æ¾²ÅÁ¬ÆÀ¯ÄÃ²ÃÁ±Ä¾³ÄÁ±Æ¾²ÄÁ¯Â¾°Æ¼¯ÅÁ­ÄÀ¬ÃÁ«ÃÁ¬Á»­ÂÀ¯ÁÁ°Ä¼°ÃÁ°Ã½±Ã¿¬Ã¿¬Ã¾±ÃÀ¯Ä¾°À¿±ÁÁ°Ä¿®Ã¼¯Ä»¬ÀÀ¬¾¿¬ÁÀ®ÃÁ®ÃÁ«Â¾°Á¿¯Á»¬À¾²Å¾®Á½®Ã¾®Á½°Æ»¬Ã½¬¾»®Á¾®À½¯Á¼«Ä¼­¾½®Ãº°À»«½»¬¿¾«¾»­Áº¯Á»®Â¾¬Á¾¯Á¹®Á»¬¿½«Á¹­¾»©Á»©¾½®À¼®À»¬¾»¬¿»ª¾ºª½º«¾º©¼»¨À¹¨»·©¾º«»¹«Á¸©½¹ª¾µ«¾¸¨½¸ª¾¸ª»¸¬¾¹®¼»¬¾º«½·©¹·«½¶¨»·©½·«¼µ©¾·«À¸¨½·ª¼¶§¾·ª»¹¨¼·¬½·©º·ª»µª»·ª»»©»·©½µ§¾µªº¶¦ºµª¾¸¬»µ¬½·©º¸¨¹¸¨¼µ¥¼³©»²¨»³¨¼´¥»·©¼¶¤»²¦»¶§ºµ¦¸µ¨¹·§»³¤»µ¨·µ¥¹µ£»³¤¸µ¦»³¨»±£¹³¦º¶¤»³£·²¤µ³¥º³¤¶´£¹´¤¸±¤¸µ¥·±§¸´¨·³¢·°¦º³¡¸´£µ±¥·²§·³¥¹±¤·³¨·µ¦¶³£¶³¦¸³¤·µ£»±¤·´¡·°¤¶²£·³¡¸°¤´¯¤·±£¸¯¢µ­¥¶®³¯¢µ¯¢·±¡·°¥³²£·ª ®²¤³³¦³±·±¤³²¤µ´¡³´¥³³¤´²¦·µ¢µ±§µ³¡·°¦·³¤¶± ³µ¢¶µ ²²£·³¢´° µ¶¢¶²¤¶±¦µ²¤·±§³²¥¸´¤µ´£¶³¢º¶¦·³¦¶³¡¸³©¶µ¦·´¤µ·§··¥¹´¦·¶¤µ³¦»·¥µ´©º¶¨·´¦·¶¦¶³§»µ¦¼·©¸¶§¹·§º¶«¸·¦µµ¥·¶¥º´¨»»«·¶¤¸µ¤º¹§··¦·¶ª»µ§¹º¥·¹¦º³¨»¸¨º·ª»º«º¸¥»º«º·§¸¹©»·ªº·ª¾·ªº¸ª»»¬½»©½º®»ºª½¸ª¼¼«¼»­»½¬¼½¬½¹ª¾º¬½¸¬½»©»º­¼¼¬¾»­½¹¬»¼«»»®½»¦¾½«¾»­»»¬¾»¬¼º¬¼º­À½©¾¹¬À»«º¼­¾¾¬º¹®¼¾­¾½­À»®Áº«¾¾°¾º¬¾½¬½¼¬Ã¾²¿¾®¿¾¬Á¾­À¼°Á¾­À¼¬À½²À½¬ÁÁ¬Ä¾«¿¾°¾¾²ÁÀ´ÁÁ¬Á¾°ÃÁ²Â¾°Ã¿¯Á½°Ã¿±Â¿ªÁ»¯¿À­ÂÃ±ÂÀ²ÃÁ¯Ã½®Ã¿¬Â¼®¾»ªÃ½°Á¿®ÂÁ°Ã¿²Â¿¯Á¿²ÃÂ¬ÃÁ³Á¿¯ÁÅ«ÃÀ±ÄÂ¯ÃÀ²Ä¿°ÃÀ±ÂÂ³Å¿±ÁÁ®ÇÁ²Ã¿±ÇÀ³ÄÁ±ÁÅ³Ç¾³ÂÂ±ÃÁ³ÃÁ°ÁÁ®ÃÂ²ÂÂ¯ÃÁ®ÁÀ¯Á½±À¾¬½º©»»ªº¾«¼·¢µ¬¬§¥rwi~b|k|bw`wqS~oYxo_qqYwo_~{`xwb|`owtxlzgw{t~ok{k{obxi]zlYut`xwdxkWo`Mk[Qn[IgbWlbQldQigSnoWonWln]rfWolSoiUoiUogUqbSokYuk[qt[x]{xd{u[zq]xoWonUroSwu[x|[wtUxqWw|W|]kn¬z±|¾§Ê¬Ö´è¥¼ò°Åú¾ÎúÄØúÉÛúÔßúÚèúÜèúàìúàëúãîúäíúçóúéïúëóúëñúíôúìõúïôúïõúïòúòöúòøúñ÷úõúúöúúöúú÷úúúúúöúúöúúøúúõúú÷úúøúú÷úúøúúõúúùúúúúúúúúøúúúúúùúúõúúõúúöúúóúúóùúðöúðøúï÷úíöúëöúêöúìòúéòúåïúäðúäðúäïúßëúáìúáëúàéúÝéúÞéúÙæúÛéúÜäúÙåúÚäúØãúÕàúØáúÖâúÕÝúÕßúÓÝúÓßúÖÝúÕÙúÒÛúÐÜúÑÙúÐ×úÍ×úËÔúÌÕúÌÕúÊÓúÉÔúÆÒúÈÐúÈÎúÂËö¾Ëñ»Æð±Âä®½Û¢ºÓ´Î²Ê¯Ã¤³¥|¡w¡~{uorifbt]ux]zt[toUriYnoSqdQl`SniQngYlkSkfQliSoiSrgWndQodWniWniSllSqi[onYonYngYokYniQlgWqk`q|l{tooutunt`xiUur_w|i{qi|tf~o_{lYzrbzu`zud|z¬§³¢¯¹®ºÀ±ÀÇ·ÁÆ¹ÁÃ®ÃÀ®ÁÆ³ÆÃ²ÈÉ´ÉÆ·ÈÈ·ÆÈ¶ÆÄ±ÈÁ³ÅÃ²ÅÆµÈÆµÃÈ³ÆÆ»ÊÈ¶ÊÆ·ÆÆ¶ÈÆºÈÇ·ÈÈ¸ÆÄµÆÄ³ÉÅµÈÆµÇÆ³ÈÇ·ÈÅ¸ÆÃ´ÆÆ°ÅÅ¶ÇÄ·ÆÅ´ÆÄ¶ÆÆ·ÉÆ´ÈÃµÆÆ´ÇÆ³ÃÃµÆÃ³ÅÅ³ÅÆ²ÂÇ·ÈÁ´ÇÃ³ÆÅ·ÆÃ¶ÅÆ¶ÆÃ´ÅÅ±ÆÂ³ÇÂ·ÃÃ´ÃÅ·ÃÁ±ÃÄ³ÄÆ³ÆÂµÆÅ´ÅÄ²ÃÁ±ÁÃ´ÄÁ°ÄÃ³ÃÀ¶ÆÁ³ÂÁ°Æ¾µÃÂ³ÂÀ³ÅÂµÂÃ³ÁÃ³ÅÀ³ÃÃ³ÆÁ±Â¾³ÁÀ±ÁÃ³Á¾³ÄÂ³ÁÁ³ÃÁ³ÃÁ´ÂÁ³ÃÂ³ÃÁ´ÃÁ³ÁÁ³ÁÂ´ÂÀ²ÀÁ³ÂÃ±¿Á°ÁÂ²Á½¯ÀÀ±Á¿±¿Á°¿¿®Á»­ÁÂ±½»¯¿¾¬¾»®½¾­¿¾³¾»¯¿¾®À¿²¿À±À¾®¿½²¾À³Á¿³ÁÀ¯¿À­¾À°¾½³Àº¯¾½¯ÁÀ­ÀÂ®¿»®¿½­¾¼­¾¼³»¾±¾¿°¼½®¿¼®½¼¬»»¯¾»¯¾½¬¾¾®½¼­¿¾ªÂ»­»»¬¾·­½¼¯¾»®¾½®»¾®¾¾­¼½­¾¹®»·°¼¾®¾½¯»¸¬»¹¬¼»¬¼¹¬»»¬¹»©¸»°»º¬»»®·½¬¹¹«¼·­»¹«¼¸¬»·­»·®¼¼¬»¸«º¹¬»»­»¹¬¹µ«º·¬¼·¨»º¬»¹«½¹©¹¸¬¹¶¬¹¹©º·«¹¸¬»·ª»·­½»ª¾·¬»·¬¶¸©¸¹¬»»¨ººª¹´©´·©¹³ª¶´ª¶¶¤¹¶¬¹·«¸·§¸´ª¹·¨·³¥·¶¨¸µ¬¹µ¬·¶ª¶¶¬¸¡®©°«³­´± ³«²¬³®²¬¡³«¶«³¬³±³¬´®°¬ µ­µ«¢¶«³®¡¯®³«³¬£´±µ­³®·¯£·¯ ²¬¶ª³«·®¡µ«²® ´¯´®´²¢¶¯¢µ²·¬³¬¡³°·¯ ³°¢·® µ±¶¯£¸¯¡·° ·® ¸¯£¹²µ¯·­¡·±¶±¡¶°¡º¯£¸¬¢·²¢·³¢º±¡¶±¡·²¡»³¢·±¤¹¯£ºµ¤¹³¤·°£½¯¢¶±¥·³¢¹´¥¹³£º²¥»³¦»¶¤»²£»²£¸²¤¹·¤¸²£¹µ¥º·¦»°£»µ§¾¶¥¼µ©»¶¦»³ª¹¶§¼µ¨¹·¦»°¥»´§º·§»µ§¾¶§¾¶§½¸§½´©½¶¨½¶§¼¶§½´¦½¸¤¼·¤¾µ§¾µ§¼·¥¾·¬»¶§¾·£»·§¼¸§¾·¬¾¸¨¾·§¿´ªÀ¹§½·«À¸©¿·¨¿·©¾¸ª¾¸ª¿¸¨¼¹«Â»¦»·«¿º¦Äº«¿·¦¿¹ªÀ¸©Á·«Á¹ª½·ªÁ¸«¾µ¬¾·ª¾º«Á¹ª¾»ª¿¹«¾¸©¿º«½º©¾½©¿·¬Ã¼«À»¬Â¸­Á¸©¿¹ªÃº¬Á»¬Áº¬¿¾«Á»¬½½¬¿»¬Ã½«¾»©Áº¬Ã¼«¾»¬Á¼­Äº®Áº¬Á»ªÃ½«Â¾¯Â¹¬Ã½¬Â½ªÃ¾§Àº¬Áº¨Á»ª½·¥¼·§¼»©º²¢µ¬®¥§rxfrYub~w]o_xgWziQuiQuoUzoUxoU|nSnS~wdonfn[tbqr~k|kwdqY~kSr`OwkOrtdtlStlKqSFkO?gWDiWMgUKkYFl[DiYMk`Mo]Ul]Il_In[Kn_DgYKn`Kn`KobQulYwxYzrUwlKziKrgFwdKtdFuwMuqSxnIzqQwzU[fl«t»¨Ã¬Ïµâ»ñ®ÅøµÍú½ÐúÊÖúÐßúÕâúØäúÙçúÝéúÜêúÝëúàêúÞïúâòúâðúçñúèòúéñúèóúçòúéôúíöúï÷úíùúñúúò÷úôúúóøúôùúð÷úôùúöùúöúúöúúõúúöúúöúúôúúóùúòúú÷úúõúúñøúòúúóúúñúúïúúñúúî÷úí÷úçöúèöúéöúêôúåòúãðúâðúãîúáîúàïúáìúßêúØéúØéúÓèúÕâúØæúØäúÔåúÓâúØàúÒáú×âúÓâúÒßúÐÚúÎàúÎÚúÎÛúÐÙúÌÛúÌ×úÌ×úÌÖúËÖúÊÕúÆÒúÈÖúÇÒúÇÔúÃÒúÅÒúÃÑúÀÐøÀÏøºÊó»Éî¶Åê®Âå«¾à¥»Õ¶Ì¯Ç«Á§¹¡§zqookkg`|_zYnO{gQtfQt_Mn`OqdMo_InWFkYIkWKk[Dl]KgUIk[Ml]IiYIi]DlYMl_KodDqfKn`UnbIubIo_On[Io_MlYQqk`w|f|gzd|li{kriznU|bOu`Sxq]|xd|zb|qYziUxiWkYunU{gU|tf¢§©³£²»­¿½¯Á¿³ÃÀ©Äº¬ÁÀ°Ä½³ÃÄ´ÆÁ²ÆÃµÈÃ°ÆÄ³ÇÁ¬ÆÁ¬Æ¾ªÂ¾¯ÅÁ­ÅÁ°Â¾´ÆÁ²ÊÁ²Æ¾²Ä»³ÄÀ°ÇÀ±Ã¾±ÅÁ°ÃÂ±Æ¿²Ã½¯ÄÂ±ÃÁ°ÅÃ¯ÆÃ±Ä¿®ÅÃ²Æ¾²Ä¿µÆÀ±ÃÃ®Â¾®Ã½°Ã¿¯Ã¾°Å¾±Ã¾­À¾®ÃÁ¬Ã¿¯Ã¾­Ã»®Â¾®Ã»°Ã¾­Å¼®ÃÀ¬Ç¾®Ã½¬Á¿°Ä½¯Ç¿¯Ã¼¯Á¿±Ä½®ÂÁ®Ã½®Ã½®Ã¿°Ã½®Ã¼­Á¿²Á½°Â½­Â¹­Á¾¬Á¾°Æ½°Á¼¯Ä¹®Ã½®Ã»®Á»®Äº®À¾­À»®Ã»¬À»¬Ã½¯Á¹¬¾¾±¿º­Á½­Ã¾®Á¼®ÁºªÁ¾¬¾¹¯Á½¬Á»®À¹¬Â¸¬Á»­¾¶¬¾µ«À»«À·©¿µ«¾¹«»·¨¼µ«½·«¼·¬À·¬½»«½µ§¾·¬»·¬½¸©¾¹¬¾»ª¿¹®¾¸¬¼·®¾·§¾º©»·ª»·¨¾·«¾¹ª¾·©½µ«¼·¨À´ª½»ª¾·ª¼·§¾·§¼¸¨½µ©º¸ªÀ¶©»µ©»·©»µª»·¨»·¥º·¨º·¬½·¥¼¸¨¾¶§»¶«¾µ¨º·¨º¸¨·³§»·§½´¦»³¤»³©»µ§¹¶¨¹³«¸µ§¸·¨º´¨¸³«º³¤¸´ªº±§¹µ¥¹µ¬»´§»³§·²¥¹´¥½³¦»²¥¹³¥·¶¥»²¥·°£¹±¥·±£·­£º³¤»±¤¸°¦»²¢¸²¥¹²¥·³¦º¯¥¶¯¥·³£µ¯§¹²·±¢´­ ¶²¦¶­¥·± ´³¤¹®£µ±¤³¯¢·¯¢·²§·®£¶¯¡³°·®¡¶©¡¯´¤±³£´³ ³°¡´²¥µ³¦³³ ±³¦´³¥³²¥³²¦µ³¤µ³£µ°¤´³¢³³£µµ§µ¯¢³³¦µ´£³³¦¸³¤´³¥··¤·µ¡·¶¥µ´¤´¯¤µ¶¢·±¦·¶¦·³£·³¦µ¶£¶³¥·µ£¸³§·µ¦¶³¤·±¥¸µ¥¶·¨¸´¤¶·§¶´¦¶¸ªº³¡ºµ¦··¨¶¸ª¶¶¦µ¶¨··§»¶§³¶¥¸±¤¸·¨··§··¨º´¥¸·§··¨»¶¨»·¨¸º§½·©·¸¨·³©¹¶¨»·«¹·¨»¸¨º¹§º¹¨¼·¨»µ«º»ª»¸ª¼¹ªº·©»¸©»¹§¸¸¨»º©¼·©»º¬¼»¬ºº¬»¼©»»¬½»ª»¹¨¾»¬¼»¬»¾­¾¼¬½¼¬¾»¬»ºª½·­¿º®¾½¯½º®»ºª½½«À»«¾»¨¾¸ª½¼«¾¼­»¼­¿»«Á½¬¼¾¬À¿­¼¼¬À¾±À½®À»¬¾¿¬»¾¬¿À¬¾¼¬Ã¾­¾¾­Á¾­À»¬¿½¯À¿¬ÀÁ°Â¾®Ã½®¿¾®Á¾­ÀÁ®Å¼¯¿Â¯ÀÁ¯ÀÁ®Â¾®Á¼¯¾¾¬Á½¯ÁÀ®¿½®ÁÀ²Â¾®À¿­ÁÁ¯ÀÁ³ÄÂ¬ÂÀ¯ÁÁ²ÀÀ°Á¾°Â¾°ÂÃ¬Á¿±ÃÀ±ÇÀ¯Á¾¯Á¿±ÃÂ±ÁÃ±À¿¯ÃÁ±ÁÁ²ÅÀ¯ÄÂ­ÁÁ°ÃÁ±Ã¿¯ÂÀ¯È¿°ÃÁ®ÃÁ¯ÁÁ¬ÁÁ¯Ã½«Â½®¼¾¬À¿­¾¼¦º±¦²±¬§¢¢tgb{dbz`|q]wn[wnYz_~i|b~xb||ftuqnuir|zoq~l|ufzq[wfYtq[t`zogukWt]Ok`KlbQi`Qg_SldKigUkdSnfOoiSndYoiQkiSlfQkiSlkUnlQurYtr[uz]w|[wtStuUunQxrQquWw|[zr]{S{`~_lq¬{Ã¥È­Øµé¥¿ô°Æú»ÌúÂÔúÊØúÒßúÕâúÜäúÝèúàìúàëúßëúãïúçïúçðúèïúçðúéóúìôúìôúìõúïôúðöúòùúóøúòøúñúúõúúöùú÷úúöúúõ÷úöúú÷úú÷úúúúú÷úúøùú÷úúøúú÷úúøúú÷úúøúúöúúõúúôúúöúúóúúôúúòùúóøúïøúëöúî÷úèôúèòúêòúäðúäñúäïúåïúâíúãïúßíúÝëúØéúØèúÙèúÚêú×èúÖãúÚäúÙáúØãúØàúÖäúÓßúÓàúÔÝúÓÝúÐÛúÒÚúÒÛúÎÙúÐØúÎÖúÌÖúÊÕúÌ×úÎÓúÊØúÊÒúÌÒúÆÐúÆÐúÃÎúÂÊø¾Èö¾Çñ»Æê³Àé¬Àß©·Ø¡³Ñ±Æ¬¾§·¡¨{xxrrkklb{_zu]uoWzoYoiUoiUlkSn]OlbUkdSndUiiOlfUkgOlgSldUiiQodSlkSllSikSnn[qiSugSonWlkOoiSkgYrldto~wqzxi|ldoYziYwqdzn~gz]{qbwtb|x]{wbxzb~{f¡¬¥³¤±½¯½Ã²ÀÆ·ÄÆ®Ã¿³ÃÆ´ÅÃ·ÅÉ·ÈÈ¹ÈÆ·ÇÆ¸ÆÈ·ÉÆµÇÈµÇÇ´ÇÇ³ÆÁ°ÃÃ³ÂÃµÆÀ²ÄÀ´ÅÄ´ÃÄ³ÆÅ³ÃÆµÆÆ³ÆÆ´ÆÆ³ÉÅ·ÃÃ³ÆÆ·ÆÃ¶ÉÆ´ÈÆµÆÇ¶ÆÃ·ÆÇ·ÅÆµËÆ·ÆÇ¶ÄÄ´ÄÃ´ÅÆ¶ÄÃ³ÃÃ³ÆÅ¶ÆÃµÃÅ³ÇÆ³ÆÁ³ÃÂµÈÇ´ÃÂ³ÁÇµÆÃµÂÂ³ÃÃµÂÃµÆÂ²ÇÅ°ÃÃ³ÂÇ³ÃÃ¶ÃÃ³ÅÅ³ÂÄµÅÄ´ÁÄ³ÂÃ±ÄÆ³ÃÃ´ÆÁ³ÁÅ³ÁÃ³ÃÂ³ÁÁ¯Å¿±ÀÁ´ÃÀ´ÃÃ¯ÀÁ±ÁÂ±ÄÁ°ÃÀ³ÂÂ³ÂÂ°Â¿²ÄÀ³¿À°ÀÃ³ÁÀ³ÁÁ³ÃÀ°ÂÁ°ÃÁ²ÃÁ²Ã¾³ÃÂ¯À¾²ÀÁ±ÃÀ°ÄÁ°¿½¯À¾¬Â¾®¾½±Á¾²»»±À»­¿»®À¾¬¿»­¾¾¯¼À¯Â¿­¿¾¯½¾­¾½¯¼¾³¿»¯¾½²¾¿¬¿¿°À»®¾¿¬Áº®¾¿³»¾°¼»­¿»¬»Á®À¼±¿¼­»¾­¿¾®»»¯¼½­½¼¬¼¾¬¾»®¾¾­½¿­¼»¯¾»¬¾»«º¼°½½®¿»­¼»°»¼®»¼­¼½¬½»­»¾­¼¼ª»»ª¿¹©»»­º»¬¹¹®½¸«½»®¼º¬º¹¬º¸­¹¹©½º«»»§»º¬¹¶­º¹­»»­¹¸©»¹ªº·®»¹¬»º«¸º¬»º©º»©»·¥¹·§¹¸©»¹¨»·§¸º«¹·«»·©º·¬º·©¸ºª¹¸ª¶µ§¸·«·¸«º·¬·¶©¸¶¨¹¶§¶·©··«¹·§·¶¬º³¨»·¦¶´«·´«·¶§µµ©¶º§¹¶ª·¶§¶¤®ª³ª³¯µ¬¡±ª³¬µ­µ¬¶¬²«µ¬²ª³ª³®³«²¬³«´¯³®´¯´«³¬³¬¶­³«´®¶®¡¶«³­´¬µ­ ³®µ®·¬³±¡·¬³¬µ¯ ¶®¶¯µ° ³­·¯´°¢·­¡·±¢µ°¡¸¯¡·²¢µ¬¶²·°¡¸² µ²¡¶°¡¶¯¡·®·±·´£º±£»±¢º±¢·¯¥¸³¢·±¡·¯£¸±¡·®¡º´¢»²¢·³¦·²¢¸±£¸±£·³¡»³£·±¢»³¦º±¥º¶£¸³¦¼¯·´£½²¦¼²¦¾·¥ºµ©»³§»·¡¼³¢¸°£»´£»²§»´¤½·¤¼¶¤»´¨»µ§½¶¨»²§¾´¦»µ§¼·ª»µ¨»³¥¼µ©¾¶¦¼¸¨»¶¦»·ª¼·§»¸§¼¸¨»·¦¾»«¾·«½¶§¼·¨»º©¿º¬¾º©¾µ¨¿»«À·§¿º¦¼·¬¾»¦½¸«Á¶¬¾¹¦¾¸©Ãº©Á¸¨¿»ª¾¸ªÀº«Àº§Áµ«¿¹©¿º¨¾·¦¾º«¿½¨¾½«À»¨Àº¬¾»­¿¸¥¿º«Á·«½»ªÂº§¾¾¬Á¹­Á»®¿½ªÁ»¬¾»ªÀ»ªÁ¹¬¾¸§Á¾¬Á¾«Áº¬Á»§¾»®Ã¼«Â»¬Á»¬Â»¬Ã½«Á¼¬Á»«Á¾¬¾·¯Ã»­¾¼«Á½¬¿¹©¾·¨¾¸©»»£»°¡³ª¬¦wzgx`zbx`|oW|oQxiWtdOufWu|_ub|t`~w[xbkqlx_iboqgn`u_zi_wnUziOq_MuiWqqWwd[q_OnQDdSFgSIiWBgUIkWFnYDn[MkYFk`Kn[FkSKo]Dn_Mf_IqbIq_KliIxkMtiUtqMrkOxfKqdItgIwqItqMunOzrMxW|[fn·|¡Á¬ÕµÞ»ïªÁô³Èú½ÏúÅ×úÈÜúÎßúÔãúØåúÚæúÚèúÜèúÝìúÝìúÜìúàîúâïúäïúãòúæñúçòúìõúêöúìöúïöúïöúìöúïøúïöúîöúóùúò÷úñ÷úó÷úñ÷úñøúñùúóùúòúúôøúõúúóúúôúúöúúöúúó÷úðùúñùúïùúî÷úí÷úñ÷úíõúéöúèõúèòúäóúçóúßðúåðúâïúÝîúáìúÜíúßëúÛêúÙéúÖçúÖåúÙäúÖäúÔãúÕáúÕáúÐáúÒàúÒÝúÎÝúÒÙúÊÝúÎÙúÊÕúÊÚúËØúÉ×úÇÖúÈÖúÈÖúÉÓúÈÕúÇÕúÆÔúÄÒúÄÐúÂÒúÄÐøÁÍøÁÌ÷¿Êô»Ìò»ÈéµÃæ³¾â°Àá§¹Û¡µÏ²Ê«Â¨°«xtilfd~`_|_uWqSzkUwiOtdQr]Io]MlSFk]Il`?gUIiYIf_In[FkYDlYFfWIk[Fi]Kl_Mn`Il`Kr[On_Io`In`Mk`OogOu]Uxud|qqu~q{foib~nW~_U|bYu~b|t`zt_{kUukYzkUxiYwkYzl]wul§§¬¯¶©ºº¬½¾¬ÀÁ²Ã¾¬Ã¾¯Ã½²ÁÁ°ÃÃ±ÇÃ³ÈÃ³ÆÄ²ÆÃ³ÇÀ²Æ¿±ÆÃ±ÅÂ³ÆÃ¬ÄÁ¬ÅÀ­Ã¿¬ÃÁ¯Å¾¬Á¾¯ÃÀ©Ã»­Ä½¬Á½°ÄÁ²Ä»®Å¾¯ÃÁ²Æ¿²ÅÁ°ÄÀ²ÁÂ²ÆÃ²Æ¿²ÆÀ¯ÃÁ¬ÃÂ±ÅÁ­Æ¾®ÇÃ²Ã½²ÆÁ¬Ã¾°Ã¾°Ä¿°Â¾®Ã½¯Â¾±ÃÁ­Ä½®Ã¾¬Å¾°Ã¾®Á½¯ÆÁ°Á»³Á»¯Â¾­Æº²Â¾®ÁÀ¬Ã¾«Á»²Ã½¯Ä»­Á¾«Ä¾¬À½°Á»²Ã½®Ã¾­Ã¼¬Ã¾¬Ä»®Á»¬Ã¾­Áº¬Á»­Á½¬Ä¼®Ã¾¬Ã¼¬Â»¯¿º¬Ä»®Á¼­¾½¬¾¾°Â»®Ã»«¿¼«¾½«Áº«¾»°Ä¹©½¸«¾º¬Á·¬¾º¬¾º®¾»¬À·¨¾»ª¾¶§¿¸ªº·«½¹¨¾º¬½¹¬¾º­¾·«¼»ª½¸ª½·¬»µ§¾¹¬¾³©½¸§¾¶©¾·©»·§·µ«¾·¨¾·¨¼¶§¾·«½·§½¸ª½´¨½º¦½´©»·©½¸ª»µ«»µ©¼¶ª½µ¬¾¶§¾·¥»¹©»µ§½´ª»¹©»·«¾»«¾µ©º´«»¸§º³ª½·ª½³§º¸¨º´ª¼µ¤¸·«»·¤»³©»³¢»¶§ºµ¨º·¥·³©º³§¼³§½µ¢·³¨»³¤¶´©º´§»´£º¶¦»´§¹®¤¸°¦º²§»³¥¸±¨·³£¸¬¥¸²¥¸³¢·¯¥¸°£¸³¨¸³¤¸°¥º²£·³¢´®¤³±¢·¯¤¹´¥·®¢·°£¸²¤·°¢¶­¦¶±¥·°¡·²¥·®¥¸²¡·°¡³®¥³²¢·°£·¯¥¸² ³©¤°±¢´²£³³¡µ²£´¶¥µ³¢¶±¢²³¢³´¢·³¦¹³¢²­¡µ³¥·´¤³°¤·³¤¶¯¥µ³£·³¢·¯¦´³¤³³¤·µ¥¶´¢·³£¶µ¥´³¦³³¡³¶¤·³¥³³¤´°¤·¶£¶µ¥´´¦¹³£´·¤µ³¥·µ¥´³¨·´ ¶¹¥·¶¥¸³ª¸µ¦¸¶¥·³¦º·§¸´¦¸·¤¶´¢·¶¤µ³§´¹§¼¹¦·´¤º¶¤¸¶¦··§·µ¨·¶¤º¹©º¶¦¸º§·¹§»·ª»¸ª··©¼¹¦º¶«¼µ¥¹·©»¹©·¹©½¶ª»¹©¹¶ª¹¼«»»¨»¸§¹ºª¼·§ºº¨»¹©»¼ª¼»ª½»ª»·¬¾½¬»¹¬»¹©»»¨»º¬À»¬¾¹ª¼¸¬¿¼ª½»®½»¬¼·¨¾»¯¿¿­¾½¬½¸¬»¹®¿¾¯Á»¬¿¿¬¼¼¬¼»«Á»­¼»«¾º¯À¿«¾»®¿¹©½¼­¿¾¨½¹¯Â¿¬Ã¿«¾½¯Áº­Á»¬ÁÀ¯ÂÀ¯¾¿«¿¼®Á¾®ÀÁ±Ã¾°ÁÁ®Á¿¬¾¿°À¾¬À½°¿¼³ÁÁ®À¾®¿À«¼¿®À¾³Á¾¯Å¾±ÁÁ®ÁÁ°Á¾­Ã¿­Ã¿­¿¿°ÁÂ²¿À­ÁÃ±ÀÁ­ÃÂ«ÁÁ®ÂÁ¯Ã¿­Ã¿²ÂÁ±ÁÁ­ÂÃ®ÂÀ±ÃÀ¯ÁÀ¯ÃÂ³Ã¿®ÃÂ´ÃÀ³ÅÃ¯ÂÂ²ÀÀ¯ÁÃ°ÂÃ°Á¾®ÂÁ²ÄÄ³ÁÃ´Á¿¬½¼«»»«»»¦¹³®¬«¡¢rfnizfu]{u]{q]zl[wi[zzf~x_{{i~~kru{tkqzzn{nft]xi]ro]uo[tk[rz]wx]tlYqfSobOlbMi`Ol_OibUidQidOkfQd`QliQkgOk`SrdQniQniSqnStlSqrWzqUxqWurUtqUuqSqoUtuMx{Sx|WwzY|[~`l¤o³¡Ã©Ù·å¨»ï¯Ãø·Ìú¼ÐúÈØúÍÙúÐàúÕâú×äúÜãúÞìúãëúàìúäíúãðúæîúåðúæðúêïúëòúëñúìóúïöúïöúðõúðõúð÷úï÷úïøúó÷úñ÷úöúúñöúôøúóùúôùúôúúôøúõùúùúúõøúöøúùúúöúúøúúöúúöúúóúúóúúóúúóùúôøúòøúðöúîöúìöúëóúêóúêóúêòúêóúæòúèïúæïúáîúâìúáìúÞëúÙêúÚæúÛéúÜæúÙãúÙâúÙáúØâúÖßúÕßúÖßúØÜúÏÜúÏÚúÎÛúÎÛúËØúËØúÍÛúÎÖúÌ×úÎÖúÎÖúËØúÌÕúÊÔúÆÓúÊÑúÈÒúÆÏúÇÐúÂÎ÷ÀÊô¼Èó»Æï·Ãì´¿ç°¼â¬¶Û¥·Ò ¬È«¾¥¶¨{tulkdif||_{x_wt_uu[qo[rgMtiQlkQkbOldUdbSigOiiSkkYikSodOgfSkdOlfWfdSniSokUrnSnlSniSidSrk]kqYqfbuxo{uu~xlo~n||grY|l]x~i||l|{d|r_zu_{r[wt[{rbzzn{n¨ °¡¯·«·¿³¾Ä³ÂÈ¹ÅÅ¯Ã¿®ÁÃµÆÆµÆÈ¸ÉÈ¹ÈÈ·ÊÇ¹ÇÇµÈÈ·ÉÈ¸ÆÆµÆÈ¶ÈÈ´ÆÃ³ÆÇ¶ÆÇ·ÆÉµÀÃ³ÇÆ³ÇÆ³ÃÇ·ÊÆ³ÈÄ¶ÅÃ¶ÆÅ³ÆÇ·ÅÂ¶ÆÆ²ÅÆ¶ÆÅ¶ÇÆ·ÅÇ´ÆÆµÈÃ³ÇÈ¶ÈÅ³ÅÃµÇÁ¶ÅÆ¹ÃÃ·ÆÈ¶ÆÃµÄÆ³ÃÃ´ÅÁµÆÁ´ÅÁ³ÃÇ´ÅÅ´ÃÃ³ÆÆ±ÄÅ³ÅÁ·ÃÆ°ÆÂ²ÂÁ³ÅÂ°ÇÃ³Å¿±ÂÄµÂÆµÅÁ³ÄÁ³ÆÁ³ÁÃ´ÄÁ´ÂÁ³ÂÃµÂÁ²Á¾³ÃÁ±ÁÃ°ÃÁ³ÀÁ´ÅÁµÃÃ³ÂÂ´ÃÃ´ÃÁ²ÁÁ°ÃÁ³Á¾¶ÀÃ³ÃÁ°Ã¿³ÂÃ³ÃÁ³ÂÁ°ÁÃ±ÂÁ³Á½¯Â¾°Â¿³ÃÁ°À»®ÀÀ¯ÀÁ®ÃÁ°¿½°¿¾²¾¿¯¿¿³Â»­ÀÁ¬¼¾±½¿¯ÁÁ¯¾»°¼½¯¼Á¯Â¿®¾½®ÀÀ¯¾¾±Á¹³¾¼«À¾®¼º¯¾½¬¿¾¬À¾°¾À¬¾À®¾»¬¾¿®À»¬¿»®Á½¬¼¾¯¾»®¼»¯Á»®»¾®¼º²¾»®¼»¬½½®½º¯»»ª»¹­»º­½¼­»¹°¾¼­½º­»¹°½¾«¿»«¼½¬¿¼¯¼¼¬º»­»º®¼¼®»»«¸»¯¼»©À»­º¹¬º¸¬º·®»¹«»ºª¾·«¸»©¹¶ª»·­¹¹¬»¶¨¼¹­»·¬»·¨»»¬¹·«»ºª»µ«»·¦º¸©¼¶¨¶·¬¹¶¬¹·¨»·¬»¸§¸·ª·¹¬¸¶¨·´©¹¹©·³©»·ª¹µ¬¸¶¬º¸ªº¶¨·µ¬µ¶§¶·«¸·§»µ¥·¶¨¶µª·¶¨µ´ª¶µ¦¹µ«·´¦´¦¬¬­ª°«°ª·°²®·«µ¬²­³¬°¬³­°¬²­µ¯²¬³® ¶®·¯²«±®¶¬µ¬³¬²¯²¬´¯´°³­´®³°³®¶®´¬ ·² ³° ³®¡³®µ® µ®²®¡µ°´­·°³­¡¶­¶³µ®·°µ®µ°·²¥·°¢¶°¡´°¡º²¡´²¤µ®¡¶±¡´°¡·³¢·²¥¸²¢·³¤»²£µ²¢¸±¡¶²¡·³£·³¤»°¡¶¶£º³ º±£·³¢¸³¦¹³¢·³§º®¡¸´¢º´¤¸³¡·²¥»º¤¼²¢»³¦º´§»´¨»·£»µ§»´¸³¥º·¤»µ¥»¸¤º·¨º¶§»¶¤»·§½³«»·¦½µ§¼µ§¼µ§¾·¥¹·©»·¤¾·¦¼¸¤¸µ§¾·£Á·©¾º§½¸©¿»¦¾¶¨½·¥¼·¦¼¶©¾¸«¾¹«¼·¦¾·§Á½©À¹©¾¹ª¾¸¦¾¸¬½»©¾»¦¿»©¾º©Á»ªÁ·ª¿¶«¿º§½º«¾·§¾»©Á»§¿º©Á·©¿½©¾¹ªÀ¸ªÀ¹§º¹ª½º©À¼¨¾º§À»ªÃ»©À»©¾»§Á¾¬Á½©Á»©Á»©¿º®Áº¬Á¾«Á¾¨¼À¯Á»ªÁ»­Á½­Áº§½»®Á½©Á»ªÀ¾¬Á»¬¾»©Ä»©½º¬Àº«À»¦¾º¦½·ª»·¤¼´£µ²³°­§¥gxdx]|`zYq_rSzlOtkOugOwkOulU|nQzt]xdqttiugrrrw_|bUu`OrdQq_OrdMrkOtl[on]ndKnWMkSDfYDbUKfU?kYIg]DgWBkYIk]Ii`FlYBkYDg]Il_Ig_Fl_MogMtkSqgKuqIwkKtgIqdKrkIwrSttOzxKztS|Ub l­w»£Õ°à¤»ì©Äò±Èú»Ðú¿ÔúÆÙúÎÞúÐáúÔáúÙåúØèúÜèúÝéúÜêúáêúàíúàíúàîúâïúâïúåïúèñúèòúèôúêôúìõúíóúìóúéöúíõúíõúïöúëõúðõúñ÷úì÷úïöúï÷úðøúòúúôúúóúúòúúôùúòøúôúúôúúõúúòùúðöúî÷úíöúêöúíöúíöúìöúèóúæòúæñúáñúãñúäïúæðúáìúÜìúßìúÝëúÛêúÙèúÖæúÖæúÔçúÔâúÕåúÒàúÑßúÒÞúÑàúÎÜúÐÜúÎÜúÌ×úÊÙúÈØúÊ×úË×úÇØúÊÕúÈØúÈÕúÇØúÆÓúÆÓúÆÓúÆÒúÃÎúÁÏúÁÏúÃÌöÁÌø¾Èô½Éï¸Æí·Ãë³Áç­½ß¬»Ù¤¶Ø£³Ñ±Çªº¦³ ¦uqigbz`{[~Y{t[zrQxkOwnQqgQrfOo_IlYInYDi[Ik[Ii[Ig`Ig]Dg]Ik[Bd]FlYIg]Dg]IkdMl`Ik`Ko_In_Fn[Ik`QqdWtq_xwi~rqrozgnb~to|dgQzfQul[tw_{qY|nUwqY{iUzq[xn[tq_~wbxq¦¨ª®·¬»Á´ÀÃ°ÂÁ­Ã»­Ã¾«ÃÁµÂÂ³ÇÂ°ÄÃ²ÆÃ²ÈÃ³ÇÃ³ÇÁ²ÆÂ³ÅÅµÇÁ³ÈÁ±ÆÂ³ÃÁ¯ÅÁ°Ã¿³ÄÂ¯ÈÃ°Ä¿¯ÇÁ±ÇÁ±ÃÁ²ÅÁ±ÄÃ±ÅÃ´ÆÀ³ÆÂ³ÅÃ°Å¾®Ä¿³Ã¿²ÄÃ³ÇÁ³ÄÀ³ÅÀ±ÄÀ²ÄÁ±ÄÂ°ÃÁ®ÃÁµÄÁ³Æ¿°ÃÁ¬Ã¼®Ã½®Ä¿®Á¾°Ä¾°ÃÁ¬Ä¿¬ÀÀ°Ã½¬ÆÁ°Ã¾°Á½­Ã½°ÁÀ¯ÃÀ°Ã¾®Â¾°Â¼¬Ã»«Ã¾ª¿½­Ã¿¯Á¿°Á½®Ã½®¾¾­¾»¬Á¼¬Ã¾«Ã¾¯Â¾­ÃÁ«¿»®À¾­Ã½®Á¹®Á»«À½­Á¾®Àº­Á¼¬Á¾­Á¼®Á¾¬½¹¬¿¼®Á¼«À½¬Á¸«¿»¬Áº­À·«À¹©¼¹«¿·©½¼«¾¸©¾ºªÀ¸¬¿¸«»¹«½½©¾¹¬¼»¬½¸¬¾º©¾·®¾¹©½»©»¸®½»©¾¹§¾º©¼·©¾µ©½¶«¹¹«½»©¾·«º·¬»·§½¹©Àµ¨½¸©»¸©¾¸¬¼·«¾·ª½¶§½·ª¼ºª»µª»¸©»¸©¿·§º·«º¸¨»»ª»¸¨¾·©»·§¼¸©½¸«»µ¦¸·§½µ¦º¸©½¸©»³©º¶¨¹·§¸³¦º³©»´¦¹¶§º´§¸²©»´§»µ¤·¶£»°¤¹·¦»³¡¸²¦¸´¦¹³¨¹³§·°¢»²¥¹²£·°¥ºµ£·³¢¸³£¸³¢·³¦·²¢¶´£·µ¨·²¤´³£·°¢·²¡·³£µ³¥·±£¹°¢³³¥²±¦¹´¡·°¤µ°¤´³£³³¢´°£¶°¤¸®¢´³¤·°¶²¢·°¡·®£´¬¥¬³¥µ±¡´± ¯³¥´µ±³¤µ±¶°£³³¢µ³¢²µ¥¶²¤³±¥³³£³³¢³³¤³µ¡´´¡·³¦·°£´³¡µ³ ·¶¦³¶¦µ²¢³³¦µ° ¶³£³¶¡·°¨µ³¦·±¢³´§µ·¦¶µ¢¹¶¥·µ¥·²¥µµ¤³´¹·¤·´¤·³¦¶·¥·¶§»¸¦··¥º¶¥µ¶§··¥¶³¥µµ£¸¸©¸¹¤¸µ¨»³£¶¶¨¹·¨º¹¦·´¥·¹¨··§¸³¦º´¦·¸¨·¹¨º³§¹·¦¸µ¨··¨º¹§¸·¦»·¦¸º©»·©¼·©»»ª¹·¥»·¬º¸¢»º«¿¹©»·§»»©»º¨¾¶ªº¼¬»»¬·¼¨¿»ªº»«¼»§»º¨»¹¬»»§¾»¬¼»¬¾»¬½¼ª½¾¬¾¼«¾¾¬¿¼­ºº¯¾»ª¼»­¼º¬½¾ª¾¾¬¾»®À¾«»½«¾½¬»»¬¼¼¬¼»¬¾¼«¾½¬Á¾¯¾¿©¾Á­¿¼©À¾¬Â»­À¿±¿»¬À½¬¾¾®¿¿¯ÁÀª¿¿¯¾¾­ÃÁ®À¿¯Ã¼¬ÂÀ­Á¾¯Â¾¯¿¾­¾¿­¼Á¯¾À®ÁÁ®À¼®Ã¿«Á¾¬¿¾¯¾À®Ã¿¯ÁÁ®Á¾¬Á¾®Á¼­Á½¬¾À®¾½¯ÁÁ±ÂÁ¬ÁÂ±Ã¾­ÁÁ¬¿Á°¾À¯ÁÁ¯ÂÁ¯ÁÂµÃ¾¬ÁÁ±ÄÃ¬¿Ã°ÁÀ¯ÃÂ°Â¿°ÂÁ°ÃÀ¬ÀÀ­ÀÂ¯ÂÀ®¾»«¼¸©»¸ªµ³±¯¬­¨nd{d`~dz~b]{tUxoUur]{qWux_~z_|~bk{xwoq|znw_zk[wbOok`lkYnq]qu[uudur_nkQl]OfYOkdMf`OfbKigSdiKk`MkbMiiUkgQkgQkdQlbMqkSlkOnnSqoSozWru[twSunOqoWroQrwUw|]tzY~U{`i¤n¬{Á£Õ²å¢¹ð­Ã÷´Æú»ÌúÃÖúÊÜúÏÜúÓãúØãúÖéúÛéúÝçúßìúßìúáèúâìúâíúçðúçóúèñúçñúèðúéðúèóúëôúïöúìöúíõúôöúð÷úðøúí÷úñøúòøúòúúôöúòùúó÷úò÷úóùúõùúöùúó÷úòùúôúúóøúõúúöúúõúúóúúòúúñùúòøúïöúî÷úïöúì÷úíõúèôúêòúëóúëòúéïúèòúæîúãíúäíúàîúàìúÜìúÛêúÜéúÖæú×ãúÕæúÖâúÖâúÖßúÖßúÔßúÒÝúÒÞúÏÛúÌÚúÍ×úÎØúÌÕúÊØúÍØúÌØúÊÕúËÔúÊÖúÊÓúÉÒúÇÒúÉÒúÈÐúÅÎúÅÌúÆÌúÃËøÂÉõ¾Çò¾Èï½Ãì³Áâ°»ß§´Ù§·Ô¦­Ð¬È§»¥°¦ztqif{d_u_{u`{w[xtYqu[wrUqiYlkQl_KfgQk`OkfMigSklQglOngMdfOkgOk_Ql`SngUniUliQtkQnkOogSkgUnkdozizzo{ztql{krnu]{qUxqdud{x`~{d|b~t`{zdzxg{t_~zi{i§£® ¬¸¬·ÄµÁÇµÃÆ³ÆÇ±ÂÃ³ÃÇ¶ÃÊ¸ÈÈ·ÆÈ³ÇÈ¸ÇÆ³ÈÇ·ÈÈ·ÈÆ¶ÆÅ·ÆÆ´ÆÈ´ÈÆ·ÅÈ¶ÈÆ·ÆÆ¶ÅÆµÇÄµÃÇ¶ÅÈ¶ÈÆµÆÈ·ÇÄ´ÃÅ´ÇÅ³ÈÅ´ÆÇ±ÇÈ¹ÆÆ³ÊÃµÃÆ¶ÄÆµÊÈ³ÆÆ·ÈÇ¸ÃÆ¶ÆÇ´ÆÇ³ÆÅ¶ÅÆ¶ÄÆ·ÇÄ³ÄÃ°ÃÄ¶ÆÂ³ÃÂ´ÃÃ³ÇÄ³ÄÇ¯ÇÃ³ÃÄµÁ¿¯ÃÁµÂÃ³ÃÃ³ÂÃ²ÅÁ³ÃÁ´Å¿²ÁÂ±ÁÃ±ÃÃ±ÀÅ³ÃÁ´ÃÀ³ÁÂ±ÁÁ³ÂÃ´ÀÃ³ÁÂ²ÀÂ±ÃÁ¶ÅÂµÂÃ³ÁÆ´ÅÀ³ÁÃ´ÃÃ³ÃÀ³ÃÁ´ÂÃ¶ÁÃ°ÁÀ´¾½¯¿Â±ÁÂ²ÁÁ¯¾Ã¶Â¾²Â¼¯¾Â°Á¿°¿Á±À¿³ÀÁ°¿½°ÂÂ°Á¾°ÀÂ±ÀÀ¯¿¿¬À½¯¿¾¯Á¿®¿»®»¼¬»¾¯Á¾²½¼¬¿½¯¾¾®¾¾­»Á®¾¾®¿¾¯À¾°Á¾±¾½¬¾¾±»¿°À»¯¾»­¾¼°½¼®½¾«»½¬»¼¬Á¾­¾¹­¿»®¾¾¯¾¿­¿»­»½¬½»¯¹»¬À»¬½»¯»¾¬À»¬º¾®»»¯¿¼¯»À­¾»¬¾»¬»»¬¿½­º½«½¾¬¼º¬»»­½»¬½»®¹º­»»­º¹¬¶¼©¹»©·º¬»º¬º¸¬·º­»»¬»»«º·¨º»©··­ºº«·º©º¶¬¸·©·¶©¹·¬·¹ª¼·¬º·­¹¶©¸µ«ºº©³¶©··«»¹¬¹¸©¹·©»¶©·¸§¶·§¶¶§¶¹©··¨³µª¸·ª¶³£º·¨¹·«·¶¥¶·©¶¶¨¸·¬µ·¦µµ¢¸¸¬¶´©·¶§·§­®´«°®±¬°­µ®°®³«±©³­²®³©´¬²«µ­´«¡²¬°¬³®´®³¯±­³­¡µ®³¯·¯±­µ¬¶¬µ¬´®³¬´®µ®³®¡·±·¯µ°·­´²±¯ ·¯¡µ°²®¡µ°³±¢·² µ­¶²¢·¬¡µ²£µ°³²¡³° ´­¸²¶²·¯¥¹´¢´°ºµ£·±¢¸²¢¸²¡·³¤¸° ´³¥¸µ¡¸°£·²£·²¢·²¡¸²¤·³£·´¥º³¤º´¤¶³£½³¥¸®¥º¶¢¸³¤¸·£¸²§¹µ¦¸µ¤»±£º´¦¸´¦º³ »µ¨½´¨º² ºµ£¸³¥»¶¨»µ¦º·§»¸¨»µ§½´§¼·§¾¸¥¼·¨»¶¦¼º§¾·¦»·§½·¨»µ¦¾¶§À»©»·¦¾µ§»¶¥¾·ª¼·¦»º§¼¸¬¼·©½¸§¾¹¦½·ª¾·¨¿·£½·§¿º¦½¹ª¾·§¾µ©¼¹©¾¸§½¹ªÀ·«¿º¤¾·¬¿»¦½¸¦½º¨¾¹¦½»©½¹§¿¸ª¾»©Á¸¨À¹ª¿º­Á»®À¹­Ã¹¦¿»«¿»©¿»©¾ºª½¸¨¾»­¾»«Áº«Ã¾«Á»­Ã»¬Á»«À»®À¹¬Á»©½¾¬Â¼©Ä¹©À»«À»¯À¾«Á½ªÀ»©À¼«¾¾«À½¬¿»©¾¼©½»£»±¡¸®µ¬±«¬¤ o{_u]|_t_w`~t_zkUzgQtfMulSwnW|oU{kW|q_frn|kzfqr|kqb{oWqbIq[Qr`QnbQl`KngUqiQqgSq]FiUIgSDg[FgUDiSBg[Fg]BfUIg_Mk]FlYDk[Ii_Dl]Oo[IrgOniOtiKrnOtqOwkIugIqgBrgKtuMxtOxtQ{zQ_k©r·|¡Ì®à¸é§¾ò²Æú»Ìú¾ÐúÇÖúÈÜúÎÜúÑÝúÓßúÓãúØäúÙéúØæúÙéúÙëúßìúÝëúÜíúåíúâïúãïúâîúäïúãóúäòúèòúìõúìöúìôúìõúíõúìõúìöúïöúëøúïõúï÷úìöúíöúï÷úî÷úðöúîöúîøúðùúïøúôùúò÷úñøúì÷úëøúí÷úíöúìöúìøúîõúèòúèóúèóúæöúãñúäñúéïúèïúäïúãîúáëúàëúàêúÛçúÚåúÔæúÓãúÖâúÖãúÔáúÏßúÒßúÎÜúÌÜúÊÙúÌØúÌØúÈÙúÌÖúÊØúÇ×úÈÕúÈÖúÈ×úÆÒúÈÒúÈÓúÃÒúÆÒúÄÐúÁÐúÁÎùÃÏúÃÌøÀÉ÷ÁÊñ¼ÇðºÆï·ÃìµÁè°Ãã©¼Ø¥¸ÓµÑ¯Ì®Êª¾¡°¢rlgg~_xY|tW~qQxnYukUuiOrkIqbUqgFlWDk[In[DfYFg]IibIg]Ik`MgYBlWIg[DiYIi[Fk`Ik`Ig`In]In`IlWIk[Il`MqnSrn`zuwli{gu`g~`oUzdWtgYot`zoYzu[z|[~t]~nYxo[zn`{t_~bxw¡£¥²¦³½²ÀÁ°Á¾°Â¾®ÃÀ°Ã¿µÆÂ¯ÇÄ¯ÄÁ°Ã¿²ÇÄ¯ÆÄ²ÈÀ°ÇÄ±ÆÃ²ÅÀ·ÄÃ¬ÆÂ´ÈÁ°ÃÁ¯Ã¿¯ÃÃ­Æ¿°ÃÁ±ÁÀ±Ä¾®ÇÁ°ÆÀ°Æ¿­ÃÂ°Å¿³ÆÄ±ÃÁ®ÃÁ­ÃÀ¯ÅÂ²ÄÃ±ÅÃ²É¾²ÃÁ°Å»±ÅÃ³ÅÁ¯ÄÂ²ÆÀ²ÂÃ°ÃÁ®Â¾®ÁÀ­ÃÁ´Ã»°Á¾®Á¿³À»¯ÂÂ­Â»¬Â¾¬ÃÀ­Áº¬Á¾¯Á¼®À»¯À¿®Á»®Á¾¯Ã¾®¿»«Â½±Ã¾¬ÃÁ­Á½¬À»¯Ã»®Á¾­Ã½ªÂ¼¬Ã½®Á½¯Áº°ÁÀ¬Â¼­À¾­Â¿®Áº®¾»¬Á¾¬Ã¼­Â½ªÂ¾­Á½®Á¼¯Ã½«Ã¾¬Á»¯Á¼«¾¼®Á»¬Á»¬½»ª¿º®À»«¾»«¾»¬À¸ª¾º§Âµ«¾»«¿¹ª¾ºª»·¬Àº¬½¸¬À·ª½»©½¸ª¼¸¨¾º§»·¨¼·¬º¹¦¾¹«¾¸¬¼»¬½¶¨»º©»¸«»¸ª»·ª»µ§½º¨¼µ¨¾·«»»ª»º©½¸§¿·§»¶«¾·¬½¸¦¸·©»·¬¾·ª»µ§»ºª½¸©»·ª»·ª¹·§»·«½´ª¹·¨º·§»¶§º´¨»·§»¸§½µ¤¹·©¼µ§¹¶§»¶¥½³¨·µ¥º´§»±§··¤¶²¦µ´¥»µ¥»±¦º³¥·³¥»°§¸µ¥¶³¢·³£¸¶£··£¸µ¦¸´¥¸³£¸°¤º´§·²¦·³§¸µ¥º´¤¹­§·³¤·³¤µ²£µ³£¸²¡¹®¦¶±£·°¢¶²§¶²¡·³¡¶³¤µ° µ­¦µ°¢·°·²·°µ³ ¸¯¥³²£³²¤·¬¡­³¤³²µ³¡³µ¤³¯¡³µ¤¶±¨³·¥¶²£²³³´¡³°¡´¶¤µ±¥µ³ µ³·³¤´³£¶±¦´²³³ ³µ¥²¶¤µ±£³µ§µµ¥´³¤¶°¤³´¤¶·¦·°¤³³¤´·¤¶²§´³¥´³¦´·§µ·¡¸¶¤¶·¤·¶¦µ³¤·¶¦´´¤·¶¦¸¶¦¹¹¥¸³¦¸µ¢·¹¥²±§µ¶¤´·¥´³¡³¶¦¹·¦·µ¨¶¸¦º·¥¸¸¥¶µ¥¹µ©»¶¨º·§¸¹¥¹·¨·¶¢¹¸¤¸µ©º·¥·¹§»´§·¸©»»¥»»ª·º§½¶¦¹º©»¸ª¾º¨¹¹¬º·©ºº¨º·¨»¹¬»¹¬¼º©»»¦º»¬º¹«¾¼¬¾»«½»¨¹»«¿¼¬¼½¬»»¬»»­Àº©»¾¬»¼¬¿»­»¼¬À¼¬¾»ª½½®º»ª»¹¬¾¾¬¾»­½»¬¾À®Á»¬½¾¯¿¾©¾¸¬¼»°¾½­¿¼¬¾¼¬¿À¬¼¾¬¿¾­À¼ª¿¾²À¾­¿¹­ÁÀ­¿¼¬¾¿°À¿®¿¼©¿½¬Á¿®¾»ª¾½¯ÃÁ«À½°Ã¾®À»¬À½­¾¿¯¾¼¬¿¿¬¿À­À¾°ÁÁ¬¾À³À¾®¿Á²ÁÀ¯Ã½¯ÁÂ®¿Á°Á¼¬ÁÁ­Â¿¯Â¿¯ÁÀ±ÂÁ¯ÂÁ¯Â¿³ÀÁ®ÀÀ®ÃÀ¬¿À¬À¼¬Á¿®ÂÁ³ÃÄ²ÁÀ¯Ã¿°À¿®ÁÀ­ÁÃ±ÂÀ°Á¾¬ÁÁ­½»¨¸´£´±´³°¯©oifg~f~b|wbww[zrUxu]tu]u|b~_w`kqztii{wqubuu]uo]rdWrkUolSrfWro[oq[tlYn`MkbMk`MidOkdOfbMndOibQk`SibOkbOlgQndMiiSkiSqiSqoWnqYutStu[twSxnQwnUurQwxUx|Yw~U|Yi n±¿ Î¬â ¶í¬»õ³Èú¼ÍúÃÔúËÕúÌÜúÒÜúÑßúÒáúØãúÙçúÚäúÜëúÛçúßìúÝëúàíúäïúäïúäïúåïúéðúçñúêñúéôúéòúïóúïõúïöúñôúïöúðøúñøúóøúñøúñôúðøúð÷úòøúóøúïøúòúúóúúñøúóúúôùúõúúôùúöøúòúúòúúñøúïúúóùúóùúòøúðøúñ÷úïùúï÷úîöúîõúîõúêòúèñúéòúèðúæíúäïúâíúàêúßêúÜëúÜçúÜçúÛäúÙãúÓãúÕáúÒÝúÏßúÓÜúÎÙúÎÕúÌØúÏ×úÎØúÌÖúÍÚúÉ×úËÕúËÕúÇÔúÍÔúÆÑúÈÑúÈÒúÆÐúÊÏúÈÍúÈÊúÈÌøÃÌ÷¾ÉôºÆõ¼ÆòºÅí´Áç²¼à¬¹Û¥´Ñ ³Ó£°Ñ¬Ê©³«zqnd~f~{[~u]uu[tr_uuYtnWooUnoSkgYofYngOg_MkbQifOkgOkgQngMlbQfbMn`IlfQigSndOggOniUlnSkkSkbQlfUuo]twdz{uodonu_zo]wrWutdxx_{{`zo{bub{{b|zb~|_lzo¦¡®¥±Â¶½Æ²¾Â±ÃÃ³ÅÃ°ÄÅ·ÆÈ±ÇÈ·ÇÆ²ÈÆ´ÆÊ¶ÄÉ·ÇÆ³ÃÇµÉÅ¶ÇÈ·ÈÈ³ÅÆµÈÆµÇÈ´ÆÆ¶ÈÅ´ÅÅ³ÆÅ¶ÇÇµÇÆµÈÆ´ÅÇ´ÆÇ´ÈÅ·ÆÅµÆÇ³ÊÇ¶ÇÈ¶ÃÇ´ÈÈ¶ÉÆ¹ÆÇµÆÇ³ÁÇµÂÄ·ÉÈ´ÆÃ·ÈÈ¶ÃÈ·ÅÆ´ÂÆµÃÄ¶ÅÄ³ÄÅ³ÅÃ´ÂÇ¸ÁÃ¶ÂÂ³ÃÆ¶ÄÁ·ÅÆ³ÄÅ²ÄÁ³ÁÄµÁÃ²ÆÃ±ÂÁ²ÁÃ±ÀÃ±ÂÀ¯Á¾¯ÀÆµÀÅ´ÅÁ³ÃÁ°ÁÃ³ÃÁ¶ÃÂ¯ÀÁ³ÁÁµÂÁ³ÁÁ³ÃÁ±ÃÃ®ÀÂ°ÁÁ°ÁÀ±ÁÂ³ÂÂ³ÂÀ¯ÁÀ³ÂÁ³ÁÂ³ÃÁ±Ã¿²ÁÁ°ÁÁ³À¿³¿¼¬ÁÁ³¾Á³Á¾¯À¿°Ã¿³¿½²¾À¯ÁÀ®¼À¯À¿­Á¾®¿Á®Á¿°À½®À¾³¿¾¬½¾±¿¾°¼½­¿»¯¿½¯¿½­Á¿­¿¾²½¾­»¾¯À¾®Á½±¿¼¬½½­½¼¬»»¬¾¾±Á½­À¼¬»»¯¼¿¯¼»¬»½¯¼»­½½®¼»¯¼¼­¾½ª¾½°¾¾¬»»®¾»­¿¼®½»¯¹¼¯º¼©½»­½»¬»¹¯º¼©»¼¬»º¬¼º¯¾¼¯º»¨½½­»·¬»»¬¸¼ª»»©º¹¬»¸«¹»¨¹¹¬»·¨º·¬·¹¬¹º¯»¹©¸¸¬ºº¬»¸¬¸¸«·¸©¹´ª¸º¤¶¹ª¹·¨½º©¶¹ª»¶¨»º¨¹»¬º¶¨»·¨·µ¦··¨¹´©¹·¢·´¨´·¨¹º¨¶¶©º¶©¶¹§·µªµ´§·³ª¶·ª·¶¤¶³§··¦·´«³·¦·´ª¶·¥··¨²¸©¶»¨¶¢©©±ª³­³­®¬±¬³­²¬ ±®³­µ¬´¬°¬°ª²¬µ¬³¬³¬µ°·¨°­µ«³­µ±µ®³¬³­³®µ°°«´¬³¯µ±·¬¶­²±·¬¡µ®µ°¡²­¶°¢¶­¢¸­·®¡¶¯¢µ°¸­¡·¬¡³±¡¸®¶­·¬ ·°µ±¡³®¡¶±¡·° µ¯¤¹²£»²³±¥·¯ ¸³¡·°£·°£·´¢·°¡·³¤º±·³¡·±¡¸¯ ·³£·±£»³ µ°¢·±¡º²£¹³§º³¤¾°£·³©¹³£º²¦¸³¢¾µ¥»³¤»±¢¹±¦¸³¥ºµ©¸²¢»µ£¸³§»µ©»´£¹´¥¼³©º¶§½·«»´¢¹µ§»µ§¾¶©»·§»¶¤»¸¥º¶©¾¶£»¶¥»¸¤½¹¥½´¥¾¹¨¼·¥¾·£¹µ¥¾·¨¼º¦½¹§À´¬¼¹¦¾·¨»º¨¾¸¬¾³§½¹§Á¶§À¹¨¾·©»µ«½º©½·¨¾·«À¸¨¾»§½¸§½·¨¾¶©¾¸©¿¸©½¹©½·©¿º¨Áº§¿·«Á»©¾¸¬Á¸©Áº¨¾º©Áºª¾»«Àº©¿»§¿¹«Ã»«½»¬À»ªÁ½ª¿½¬Á»©¿»¬Á¹­¿¼®Ã¹ªÀº«Á»©¾º«ÁºªÃ½«¾¹©¾»¨Á¼¬¾»©¾¹¬À¸ª¾¹§½²´¨´®³¯«¤¤ow`z[~bw[~w_uW|lUzdMwgQxgStlWxqU|oYq_dtonfdnil_zbWqgQo`QnYMn_MobOq`MnfOrdOn`OlUDkUBgUDgYDgQ=fSFgWKkWFgWDi]Kg]Dl[Dl]Ik]FlYIg`MngKqkOrkMwlQrnMrgOwiFulQtoMuuKxwQWdªuº¡ÅªÒ³æ¦¼î­Äú¸Ìú½ÐúÄÙúÊØúÈÙúÉÛúÏßúÎàúÒßúÓäúÓãúÖçúÙæúØæúÚéúÝëúÝêúÝìúâîúàïúâñúâïúâïúæðúãðúçòúëóúéöúêöúëöúíöúïõúðôúí÷úïöúìöúîõúïõúïõúðöúï÷úî÷úñ÷úòøúñùúòöúðùúî÷úñ÷úïøúð÷úïöúí÷úðøúïõúîöúìõúìôúïöúëõúèôúéôúèòúæñúçðúæíúâîúßêúßêúÛéúÛæúØéúÕâúÕâúÙâúÔáúÑáúÐÙúÏÜúÉØúÍÚúÌÙúÌØúÈÖúÈÖúÇÖúÈÕúÇÔúÃÐúÇÓúÆÒúÁÒúÃÑúÄÒúÃÐúÃËúÀÏøÃÌùÂËö¼ÊõÀÈò»Çô¼Æð»Åî·Âì·¿ê³Áã¬»Ù©·Ò¢³Î²Ê°Ì«Çª»£©|tld~btWxqU|nWxnQzoUunQtkQqbQqfKo`Mk]Il]IkU?bMKn`Id[Ii`IiYBg[KgUKk[BfWFi[Ik`Ik[Fl`In[Iq`Fk[In[Mk_Mlk[wz|rn|`ug~ufrUxdQxgOxfYqoYznWzwd{z]{id{t]|rb~u`{tdo]|¤«³¬¼Â¯Á¾°¾À°Ã¾®ÁÁ®Â¾°ÄÁ°ÅÀ³ÅÁ¯Ä¾²ÅÀ°Æ¿²ÃÄ²ÆÃ°ÇÁ±ÇÁ²ÆÁ±ÃÃ²Ä¾±Æ¾³Ç¾¯ÄÀ®ÃÁ°ÃÀ°ÄÃ²ÇÁ°ÆÀ²ÆÀ±ÆÁ°Ã¿´Ä¾³ÃÀ²Å¾²ÆÁ´Å¿²ÆÁ²Ã¿°ÃÃ®ÄÀ®Å¿±ÆÁ²ÃÃ³Ä¿²ÃÀ³ÄÁ®ÂÁ°Ã¾«Ã½°ÂÀ°ÃÁ±ÄÀ±ÄÀ­Â½±Ã¿®Ã¾²ÀÀ¬Ã¾¬Ã¾­¿¼®Á»¬ÁÀ²Ã¾®Â»¬À¼­Á¾²Á¾­Áº­Ã»­À¾®Ã¾®Á¾«¾»¬Á¼¬Á¼®Ã¼®Ä»¯Á½¯Ã¼­Á»­Á½¬Á½®Â»±À»­¿½¬À¼®À¾«À»©À¹°Ã½ª¾º®¾·®¼»«Á»­À·­Ä¸ª¾»¬¾º«¿ºªÁºª¾º«¼¹¬Á¹¬½·«¾¸«¿½¬Â·¬»¸­¿¹¨¾º­¾¹«¿»¬½·«½·§Á·ª»»ª¾¹«½»©¾µ¬¾¶¨¾µ§¼·ª¾¸ª¼·«»·¬¾¸¬»·ª»·¨·¸¬¾µ«½¹¬¸·§»´ª½ºª½¸«º¶§¼¶§»·«¼µ«»·©»·«¼µ©½µ§ºµ¨½³§¹¶§À·ª¸µ«Áµ¥»µ©»³©»µ§¾´¥»µ©º¶¨¸´©º·©»³©¼¶¤¾µ§º³§º´ª»³§·¶¦»³©¸µ£º³§»²¥·³¢µ²¥¹¯§·´¦¸°§º´£¸± µ²¤´±¥·´©¸³¤»²¥·´¥·´§·³§¸±¤¶²¥¸²§·³£µ°¥¸®¥·³£¸±¤·²£·±£¸µ¤·°¤º³£´°¢µ­¥·² ·°£µ­£µ±£´¬¤¶± ¸¯ ³²¡·¯£µ¬£´°³²¥·¬ °± ³°¤µ²¢³´ ³µ¢µ³¥µ³§³²¢´²¢³³¤·±¥³±£³±¥³²¤´³¢¶³¤³¯£³³¥µ³ ³°¤³³£¶³¥²³¤³³ ·³¥´´¤µ³£µ¯ µ´¤´³¦·µ¤¹·¡¶´ ·´¥·³¦·³¥¹³¤´´ ·³¥¹´¦´·£¸´©¶¶¦¶·¦·´§¶¶£¹´ ¹µ¥´·¦¶¶§¹³¢¸³¬¹·¤·¸¦µ³¦·³¦´·¡¶¶¬ºµ¥·¶¨¸·§·µ§¸¶§¸·©·´¨»¹§ºµ ·³©¹¶ª¸·¦··¦»·§º¹§¸·§º»¦¹º©º¹¨¼»­»¸«¸·©¸·§ºº¬»¹«¼¸©¼¹ª¼¹¨ººª¹·©¹¹¨»»«¾»«º»«¼»©»½©¼º¬¾»¬»¼ª¼»ª¼¼¬¼»¨»¼ª¿º¬¾»¥½¼ª¿¼¬¼·¬Áºª¾·«»½¬¿¼¬»½¬¾¹­¾¾¬¾¿«½½¬¾½¬½¼§½¼¬Á¾¬¾½«»¾ªÁ¾¬¼¼®Á¼¬½½±À»®¾¾«½¾¬¾½®Á¾¬Â½ªÁ½®¾Á­¿Á¬¿½­À¾¬ÁÁ¬¿¾¯Ã½¬À¿«ÁÀ¬¼½­Á¼®¿¾ª¾Á®¿¼²Ã¾¬¿¾±ÀÁ®ÂÀ°ÄÁ°À¼¯ÁÁ­ÁÁ°¾¿°Ã¿°Â½±À¾®ÁÁ¯Á¿²À¿±À¾°À¿­Á¿°ÂÃ²¿À³Á¿±Â¿®ÁÁ¯ÃÀ©¾Á¯ÂÁ¯Á¿­Á¾°ÂÁ¯À¼°ÁÀ­¿¾§»³ ³³£µ»¢³³©rfnkd|fzd{nYrn]ww_{t_{z`~|d~|bkr{quooozd{fWodUno_nlSndSlnWllSrlYnwWrrYoiUl_Mo_KndOf`Qi]MlgFgfOk`SidKgbOiiSnfMniSliQniQnlUtoSrrWru_zSrr[urOtuQuxWt|Ux~S{]n¦u¾Ë©Ø·ê©¼ô³Æú¼ÉúÀÐúÇÖúÍÛúÌÚúÎßúÐÞúÐàúÔâúÕãúÕäú×çúÙçúÝêúÜéúÝëúÞëúãìúâìúäîúãíúæðúêóúéòúìóúéòúíôúíòúïõúðøúðöúðøúò÷úôøúóøúðöúòøúòúúò÷úð÷úôøúõùúóùúôúúôúúöúúóøúóúúòúúõøúõúúöúúóúúóøúóùúðøúñùúóøúðøúï÷úïõúðöúîùúìòúêðúìòúéóúéïúäïúäïúâëúÝëúÙéúÝçúÝçúÜäúÖâúÓâúÖßúÑÝúÐÜúÐÜúÐØúÍÚúÊÖúËÛúÌÕúÍ×úÊ×úÊÖúÈÕúÆÓúÆÓúÆÒúÆÓúÃÒúÄÐúÃÎúÅÎúÁÍú¾Ë÷ÀÊöÁÈôÁÅô¾Åô»Åð½Äí»Àé³»ä¬»Ü©´×¤³Î®Í¬Ì «Á£³§ {ng~f{|`{w]wwWww]uw[tq_qq[qrUnqUolSnnSi_Ib_QlkOidUikSnoUliSkdUliQniOkdSlkSlkWikQldSnnUlfOifYqkSqr`uz{~ {zq~nk~|`{l[wn[zt`tzdzu`xzbz{fzxf{|fl|iz_{d|w©¥¹«·Æ³ÂÁ²ÁÅ³ÅÂ´ÂÄµÇË³ÄÆ·ÅÆµÅÃ³ÅÉ·ÅÅ¶ÈÃ³ÃÅ·ÇÆ¯ÆÄ¶ÆË·ÈÆ´ÄÆ³ÇÂµÈÇ·ÊÅ°ÅÃ¶ÇÆ¶ÃÈ·ÆÄ¸ÇÅ³ÅÈ¹ÈÅµÈÈµÅÇ³ÆÉ·ÇÊµÆÇ·ÅÃµÅÆ·ÆÆ¶ÆÅµÃÉ·ÆÆµÈÅ·ÆÅ³ÆÅ³ÄÆµÄÇ´ÆÆ´ÄÆ²ÂÄ¶ÆÇµÄÆ³ÆÅ³ÈÄ¶ÄÃ¶ÃÅµÆÅ³ÄÄ³ÃÄ³ÅÂ³ÅÆ³ÂÁµÆÃ³ÁÄ°ÂÂ´ÃÂ³ÂÄ²ÄÁ²ÃÁ´ÃÃ³ÃÄ´ÁÂ³ÅÂ±ÃÄ³À¿±ÂÂ¯ÂÁ´ÁÁ³ÁÁ³ÂÁ²ÁÃ³ÁÂ±ÂÂ±ÁÁ±Â¾±¾Á³¿Â¯ÁÃ±ÀÃ³ÁÂ²¿¿³ÃÂ®ÀÂ°ÁÀ±ÂÁ²ÀÂ³ÁÁ¯ÂÁ¯ÁÁ°Á¾°Á¿°½À®¿¿¯Á¿¯À¿°¿À®Á¾³ÁÁ¯¾¾¯¾À¯ÀÁ°¿¿±À½¯ÀÀ®ÀÀ®Á¿°¿¾°¾¼¯¿»®À¾±¾»¬½½¬¾¾®¾¾¯Á»¯»¼®¾Á­¾»­¾»®»¾­»¼¯¿»­¾½¬»¾¬¿»¬ÀÀ®½¼­ºº¯¾¾®½¾¬»½¬¼º¬½½¯¾º¬¹º¬»¼®¾¸®¼½¯¾¾°»¼¯¿»©»»®¾¹­¼¾¬»¾¯»·¬»»­»»©¼¾¬¼¹¬»º«¼º¬¼º¨¼½©··®»¼°»»®¸º«»¸¨¹·©¼´¬»µª··ª¹»¬¹¸§»¶©»»§»ºª¶º§»¶«¶·ª»·ª¹»ª¶¶ª¹·¨¹¶ª¹·ª·»©·¹¦¶¶¬¶µ¨··¥º³§¶³¬·¶«¹¸¬¸¹ªºµ¢º·§º´¨º·¨¸·ª»´¤¸¶¨¶³¦µ¹§··¦·´¥·´§µ¶¨¹µ¨¶µ©¶¦«ª±­³«¶¬°«²«µ«³¬²­²ª³­´ª°¬°¬³¯³®¶¬³® ²­±­´¨´©³¬ µ­·¬ ²¬µ«³«¶±³¬³¯·«µ®»¬µ¯ ¶°¡³®¶«µ­´°£·® ¶¬µ®·¬³­·®¶¯¡¸¬·®¶²¶®µ°´®¶° ·®£·® ¸¬³®·®´³ ·®¹®¢·® µ³¡»°¢·²¢¸¯¶° ·±¡¶® ³²¡º° ¹° ¸¯£·°£¸° ¸°¸´¡¸µ£º°£·´¼´¡¸°¤º³¥¹³¢»³¢ºµ§»²£¸±§¸²£»´¤½µ¨¹³¤¼³£ºµ¢¹·¢»´¨¹·§º³¨»·£»¶§ºµ¥½³¥½¶¨»´£»´©º¶¥»²¤»³¥»·¨¼´§½·©¼·¦¼¹¥¾²©¼¶£½·¦¾·©¾¸©½¶ª¾´§¼µ§¿¶§½·©¾´¤½¹¤»¸£Á·¨À·§½·¨¾´§¾º¦À¸¨»³§¾·¨À·¨½³¨Àº¦¾ºª¾¸¨¾¸©Á·¤¾¶©¿·§¿¶©½¸©¾¸¬½·§¿»©¿¸¦Àºª¾¸ª¿º«¼¹§¾º©Â»©Á¸¥À¸ªÀ¹«Ãº©ÁºªÀ»«Á·§¿»¬Á»©¿¹©¿»¨Ã·ªÁº©Â¸ªÁ»©Ã¹«À¹§¾¸ª¿»¬À·©¼µ¤½­ ¸«µ°µ®®§£wzYw_z_q[oWnU{fYz`It`MrgQ{nSzqY{qYufknnnl{kxb~u]|bQt]IqUIn`Ml]Fk]IlUKl]Do_IkdUtgKo`FgSIiO?gY=iMBlSBiUFdM?fW?nQDfYBlWDiYBk]BnQBq_Dl`Ot[KrkFtkOtnOwfKtiItkFznKwuMzwO[k´|Å¦Ð®Þ¡»ë®Áø³Êú¹ÌúÁÒúÅÕúÈØúÈÙúÉÜúËÜúÌÞúÎáúÎáúÑâúÑãúÓãúÕçúÖçúÖêúÙèúÛëúÛïúàíúáíúãíúæîúãñúâðúáðúäóúèóúëôúì÷úîõúð÷úïöúí÷úï÷úíöúìõúîöúïôúñ÷úô÷úñöúòùúñöúóùúò÷úï÷úïúúïùúïöúô÷úòøúñ÷úí÷úïõúï÷úìøúìøúëöúîöúîöúêôúìõúèóúäñúçïúæðúæîúåíúßïúÞêúÚèúÛçúÖâúÕäúÔãúÒáúÎßúÎßúÎÛúÌÜúËÙúÌÚúÉÖúÊ×úÈÔúÄÓúÈÖúÅÖúÅÔúÃÓúÆÐúÂÒúÂÏúÁÏúÀÌ÷¾Ì÷¾ÌùºÊøÁËõ½ÉôºÇò·Æï¸Æî·Æì¹Ãè´Ãè³Áá¬½Ü§¸Ú¥·Ó ³Ê¬Ã¬Áª¸±£~rg|buYnYxlQxkMudQofQqiQriMogQt`Mn]Fn_KlQDgQBgSFk]Dg_Ol[OlWFl[Ii`MkUBgYDl[Dn]DkYIibIn]Fn]DlWIlYKo]Mnkgxuqtrfz`t_w_gUzbOzfYuqUzdWxo]~|_zqW|ob|td|t`~rYo_u`|© ®»«½À²ÁÃ®Ã»±ÂÁ±ÆÂ¯Ç¾®ÆÁ³ÃÀ¬Ç¿²Ä¿±ÄÁ¯ÆÂ°È¿°Ã¾²Ç¿³Ä¾¯Æ¿´Ç¾®ÂÁ°ÆÁ°ÅÃ²Ã½¬Æ¾±ÄÁ­ÃÁ¯ÆÁ°ÆÁ°Å¾±Æ¿¬ÄÁ°ÄÂ²ÆÃ¯Ä¾°ÄÀ­ÁÃ±ÄÁ²ÆÁ°ÃÂ®Ä¼±ÆÃ±Æ¿³Æ¿°ÃÀ³Å»°Å¼®Æ¾¬Æ¾¬ÃÀ¯Ã¾«Ä»®Ã¿­Ã¼°È»®Â¾®Ä¾¬Á½­Ä¿¬Ç»°Â¾°Â½¯Â»¬Ä¾¬Â½¬Á¾°Âº¬Á½­Á»¬ÃÁ°Ã»¬Â»¬Ã»±Á¼®Â¼«Á¾­Âº¬Â¿­Á½¬Ã·¯À»©Á»«Áº«¾»­¾»®Á¸«Á»­À¼®¾»®Á»®½»¬Áº¬À»©Á»¬¼º«¿º©½·«À¼«Àºª½¹­À·ªÁ·«¾»«Áº«½»ªÁ·¬¾¸¬¿¸©¾º©¾¸«¾·¬½»«½·©¾º«¾·ª¾·¨½·ª»¸§½¶§½µ©¾¶¨½·«½¶¨¾¶ª¿·¦¾·ª»·©¾º©¾¶©¾µ©À·¨½·­¼·¨¼·«¼µ¥»·©»·¨»µ«»³¥¹µ¬»¶¥½·©Àµ§¼¶§¼¶§º´¥»³ª¹·¨¼¶©»³£¸·§»¶¦¼·§½·¦¹µ§»¶¥¼µ§º²¨»³¦¾´¨¹³¥¼´¨¼³¦»²¦¹²¥·³¦·³£º³£·³¤·±¢¸³¤¸±£»²¤¹²¦»´ ·³§¸³¥¹²¥·±¡·²£·±¡»±¦º¯¥¶¯¥¸±¦·±¡¸°¢¶³ ¸°£·­§´°¤´¯ ´²¢·±£·°¤µ±£¸¬£µ±¤¸¯¡´°µ«µ®¤µ¯ ·«·± ·¯¡·°£³«¢·°¡´¯¢¶­¯±£´³¤³³ ¶²¡´´¢³±¦µ¯ ¶³¤¸²¶µ¡¶³£¶³£·µµ³£·³¢³´¤´´¤³³ ·³µ±¡·´¡¶³¤³±£³³¡¸¶¢´³¤¶´³³¢·³¥µ¶¥·±¤´´¡¶·§¹³¤´µ·µ¥³³ ¸·¦ºµ¢µµ¦¸´¥»º¦¸³ ·²¡³µ¦·´§··¤¹µ¤»µ§¸·¦º³¤··§¹·¥·¶©·µ¥º¶§ºµ§·¸¦»·£µ·ª·µ¤¸º§··¤¹·¦º¶«»º¥¶¶¦´»¨¸¹¤»»¨¶·§··ªºº¨º¼§ºº¨»³§¹¸§¼»¬º¹§¹µ¨½¼ª»½©º¹¨»º§¾»®»¼¨¾¹¦¾¼ª»»«»»­¾¹«¾¼¬»»ª¿½«½¼§¼¼¬¼½¬¾½«¾º¬»·¨¾»®¼¹¬¿¼ª¾¹­»»¬¾»«½¾©¾¾¨¾»ª½¼­¿¼¬¿¾«¾¾®¼½¬À¼«½¼ªÁÀ¬À¾­Áº±»¼¬Â¾¯¾¾ª½¾¬À½«¾¾­¿¿­½º©¿¾¬ÀÁ«ÁÀ®Á¾­Â»§¾À¬¾½ªÁ½«¿Á«À¼­ÀÀ®Á¾­¾À®ÁÀ°Â¾«¿¾®Â¼­Á¾®Á¿¬Ã¾®ÂÀ¬¾Á®ÁÀ°Ä¿®¾¿®ÃÃ®ÁÁ¬Á¾¯Â¿°Ã¿¬ÀÁ³Á¿¯Ã¾®ÅÁ¯¿¾­À¾­ÁÀ¯ÁÂ­ÆÀ¬ÀÁ®Ã¿´ÂÁ®Ã¿­ÁÀ±ÀÁ°ÅÁ¯ÁÀ³ÁÂ°Á¾«¿¹¨¾¹£º³¤·ºµ±¨¡tigd|f~{_~xYzn[xkWzq`zrW{uYxxb~gnruoxunn~d~oYqiQrbUnfUqfQlfQndQlkQokUoq_nx]wkSodQkbKkiKkYMkbMdfKi]MkbOlbKlgQldSkfOniQlkSrnQloSrnYtwQwxWx{[ztSurWwtQwwUzW_t·~Å¥Ö±á¤·ï®¿ö·Ìú½ÎúÃÓúÇÚúÉÚúÍÜúÎÛúÍßúÐÞúÎàúÐâúÓäúÖäúÕãúÙæúÙçúÛèúÞìúßìúàìúáïúâïúàïúäñúèïúäðúçôúêñúèòúëôúìöúðöúð÷úò÷úðõúñ÷úóøúñøúòöúðöúõ÷úôùúóúúõúúöúúõúúöùúôúúóúúóøúñøúñøúôúúõøúðùúó÷úóùúñøúï÷úð÷úòùúóøúï÷úðöúïöúîôúëóúíòúìòúèðúèïúçïúáìúÛèúßêúÜèúÚæúÛåú×äúÖßúÖáúÐßúÔÝúÒÙúÑÜúÌØúÌÙúÈÖúÎ×úÏØúÊÖúËÖúÇÙúÉÔúÉÖúÈÒúÄÐúÂÏúÁÌúÃÎúÁÌúÂÍúÂÊùÃÊø¾Êö¾Æò»ÃóºÂí¸Áì³¿è³¾ä¬·Ý¯·Ù¦²Ñ£¯Ì¯Ç©¾ ·ª|oi{d~wbwx[zw]un[urUoqWorWrnWwnWnfSokUnbOi_Kk`WgiMiiMiiQogKk`OggSkbQgfSnfQliQlgUilSofStlMnkUkgQngUqriw {xlxko~`{n]xq[w|`zx`ww]{gzxb{di|kg{l`w©¤«À°»Å´ÁÆ¶ÄÃ´ÆÆ´ÃÈ³ÈÇ·ÈÈµÈÉ±ÆÄ¶ÆÆ¸ÇÊ¶ÈÈ·ÅÇ¶ÆÈ´ÆÇ³ÆÈµÇÆ·ÈÆµÆÈ³ÈÈµÊÈ¶ÇÇ³ÇÅ·ÆÈµÆÈ¶ÈÇ³ÈÇ¸ÇÂ¶ÆÆ¶ÆÅ¶ÅÆ¶ÆÇ´ÆÃ´ÈÇµÆÅ³ÅÅ·ÄÃ¶ÆÆ´ÇÆ¶ÆÅ´ÉÅ³ÅÆ´ÃÈ·ÆÂ´ÆÄµÃÅ¶ÈÄ²ÅÅ¶ÂÄµÆÆ³ÆÃ³ÆÃ´ÆÂ²ÃÄ³ÆÂ´ÂÃ²ÂÅ³ÃÂ³ÆÆ³ÄÀ±ÅÂ³ÃÂ±ÆÃ²ÃÆ³ÃÁ°ÄÁ®ÃÁ³ÅÁ³ÅÃ³ÁÃ³ÆÄ³ÃÃ²ÄÁ²ÃÄ±ÂÃ³ÂÅ³ÃÂ°ÃÃ¶ÃÄ°ÁÁ±ÃÁ³ÂÃ°ÁÃ±ÁÁ³ÁÁ²¿À¯Á½²¾Ä®ÀÃ­¾Á´Ä¾¯ÀÂ«Á¾®ÃÀ±ÄÁ³ÃÃ°ÁÁ¬ÁÃ¬Á¾³ÁÁ±¾Á®ÁÁ¯Á¿³ÁÁ®Á¼°¾Á¬¿½®Á¾®ÀÀ³Á¿­Â¿±¿¿®Á¼²¿¾²ÁÁ­¾¾®Â½®Á¾°¾¿­À¿®¾½®À¾¯Á»«¿¼­À¾®Ã½¯¾¾³¿¼­½¼®º»¬¾¼­¾¾ª¼º¬¼»­½»­»¾¬»»®»¼°½¼­À»®¼»¯»½¬º½¬»º¬»º¬»½­»»¬¾»¬º¼¬»¼«½»ª½º­½½§½»ª¼»­»º«¾»©¹º¬¼¹¬º»¨»¼±»¸¬¼º¬»»ª»µ«º¹©¹»©º¶©¹»§¿¼ª»¹¬º·«¼»©¸·©º¸«º»§¹¹¨»¹¨··©º¹¬»µªº¶¨º·¬º´«¹´¨»¹¨¹¶§·¹«¹¶¨·¶ª»¹¦¹µ§··©·¸¨º¹¦¸¸¦¸·¤¶µ«¸·¥¹·¦··¨·µ§¶º¨¹³ª·µ©¶´¬¸³¨¹¶ª¹¬«²«±­ µª°¨³«´¬¡´«³¬¢µ«±ª±«·®´¨²­³«µ«³¨²«·«³­µ§³¬¶®µ§³«³®²¬³¬´¬´­³®·® ³©¶°²¬ µ° µ°·®¶®¶¯¡µ¬µ¬·¯ ·«´­·¬·°£·¬µ®·°¡¹°¡¶­¡µ°·² ¸±µ²·°¢·° ·°¡·® ³°·°·±£·®»¬·² ¶²¢º±¢¹±£º³¡¸°£·² »²¡·®¡·³º³¤º³¤¸±¥½°¸²©º± ¸°£¸²¦º³£½³¤¹³£»³¨½²¦¹³¤½³¦»³£»µ¢»´ªÀµ¡»´¤¼µ§½·¥¼´£¼³¤»µ£½·¦¾µ§½±¥¼´¥»³¦½·¦½¶¤½´©»µ¨½¸£½·©½µ¥½·£¹·£»·©¼·¦»¶¥¿¶¨ºµ¦¿·¥¾µ¦¾·¥¿¹¨¾¶¦¾·£»·©»µ§¼³¦¾´¦¾¶©½µ¦Á·£¼¸©½¸§Àº¦¾·£½·§¾·¤¾¹¦¿¸¤½·ª¾¶§¿¹£À·©Á¹¥¿¸§¾¸©½¹©¿·¨Àº­¿¼©¼·¨½»§¿»©¼»¬Âº¨¾·©À¸¬Àº¬Ã¸©¾»§À¹©¿¹©¿·¨¾¹ªÁ»©À»©¿ºªÁ¹¨Á¸¨À»¬Á»©¿¹¬¾»©¾¸§¾¶ ¶²¶®·²²¢w`u]z_u]qSkUx`Or`Iu`OzgOtdSwkQ{nU{b~diqlok|l`l_w`KtYIkWDkYOqWBiSDgYDiWDl]FkkUqfMnYIiOIiUDfQ?dQ?gMBkUDfQ:fSDiUFgWFiUFnYFlYFn_Fq]BlbFofKtlQwnItkKtgKugFqnMwoI{tQ~Yo¸¢Ð«Ûµä£¾ó³ÄúµÊú¾ÑúÃÕúÄØúÆØúÊÜúÆÛúÈÜúÌÜúÌßúÌÝúÌÞúÐäúÑâúÒãúØæú×çúÛçúÛéúÛëúØëúáìúáîúÝìúâíúßïúßîúàïúãðúçóúéôúèöúêôúíõúìõúïöúïöúì÷úîøúêóúñöúò÷úòöúñ÷úòøúï÷úð÷úï÷úïúúìøúïöúñùúñùúîøúí÷úìöúïøúïøúêöúï÷úîöúîöúðöúïóúëôúîóúèòúåòúãíúæïúàíúàëúÛéúØçúÛâúÕãúÕàúÕßúÓÞúÏàúÏÞúÐÜúÏÜúÈÚúÎÙúÌ×úÊÖúÉÕúÆÓúÇÕúÆÕúÆÒúÃÕúÆÕúÄÐúÃÒúÁÏú½Ïú¿Ì÷¿Ì÷¾Êø»Ëõ»Çó¼ÈñºÄî·Æê·Ãè´Áç¯½æ²¿àª»Ü©·Ù£·Õ ±Ð®È©Ã¦·¡®£zrldtY|iUwkSwkQtfMubQrgMqbQnbQo`Kn`KlYDk]?kQFiUBdYFi]KkSBlQBgQ?iWDi]IoY?kUFgYDlWDk]Kk_Mo_Il[IkYKl`OqdUtut||{g~b~duW{`Ou[Qun]xwUwiUwkYwtYzkUzo[zrb`t]rYog £·­·À¬Á¿­Á¾®ÂÁ®Ã¿°ÁÁ°ÆÁ°ÄÁ°ÂÁ®ÆÀ±Ä¾¯ÆÂ±ÆÁ±ÈÁ¯Æ¾°ÅÁ²ÄÁ­ÇÁ²ÄÁ¯Ä¾²ÆÁ³Ã¾°ÆÁ±ÅÀ­ÄÀ±ÆÁ²ÆÀ°ÃÁ±ÄÂ®ÃÁ°Ç¿¬ÈÀ°ÅÁ®ÅÁ°Ã¿®ÄÁ´Ä¾¯Ã¾°Ç¾±Æ¾®Ä¾®ÆÁ¯ÅÀ¬Â½®Æ¿°Ã½¯Á¼±ÃÁ³Æ¾¯Å¿®Ã½°Á¾¯Ã¾®Ã¾ªÂÁ®Ã½­Ã¾®Áº«Ãº¬Á½²À»­À¾¬Ä¾¬Ã»¬Ã»«Á¿®Ä¼¯Â¼¯Ã»¬Áº®Áº«¿½­Â½¬Á¾®Áº®Á»¬Á»ªÁ»­¾·¬¾½­Ã¼¬¿¸©¾¾«¾»¬Á»¬Á¹«¾¸§¿»«À»¬Á¼ª¾»«Áºª¾¸¬¿»«Áº¬½»­À·­À¸©½»«¾¸®¾·§½µ«½¹¬¾¸«Á»ªÀº§Àº©¿¸¬¾¸®¿¸¬»¸©¾·©¼º«¾¶§¿·¬¼¸§¼¸ª»¸§À¸§½µ§¾·«¼·ª¾µ¨»¹¬½¶¨»¸ª»¶¤½¶§¾µ§½·¦»·©»µª¾¶©»´ª¹³§½·¥º´¨»´¦½µ¦¾¶«»´¨¸¶§»³¤º·ª¾µ«º·§½²¥»´¥»µ¡»´¥»´¨½µ©»²¦¼³¤º³§»´§»³¥¹¶¦¹³¥»³¥»µ¤µ³¤º³¢º²¢»³¦º°¥¹²£¹²§»³§·²¡»²¤·³§·±£¸³§¸³¥¸¯£º¯¤·¯£¶° º´¥¸°·³¤¸°¤¸­¢µ±£º°£·¯¤·²£»°³°·­¡¶®¥·®£·° ¶¯´²¢µ°§·¯£µ®µ¯ µ­¡µ®£¸®¡·¬²®¤µ®¡µ°¢µ³£µ¨¬¯¢³²²³¤µ³°±¡´²µ³¥¶°¦³´¢µ¶¤´¶£³°¡·´¥¶±¡´µ´°¢²¶¢µ³¦¸°£·±£³³§·³£·±³°¢¶³¦µ¶¦·´¥´¯¤µµ¦·³¨µ³£µ²¥¸´¤µ³§¹³§µ²¥··§¶´¦»¶¤¸´¦µ³¢µ³¦·³¢¸·¦·³¤·µ¥··¥¶¶¤¸´¤ºµ©¹³£¸¶¥µ´¨¶¸©º¶§»´¥·¶¥º´§¸µ£¹»©»·§··©º¹ª»¸£··ªº·©»·§·´¦¹¸©·¶¤»¶¦»·§¸·¥¸·¨¸¸©»¹£»¹ªº»¬½¸¬º·§½½ª»»¨½»¦»»¬º·ª»»¨¹·«¹º©¼¼¨»»¨¾º¬¹¹©»º¨¼º­½·ª»»¬¼¼¬¾¾¨¿»¬»º¥¼¼¬¾¹¬¾»¬¾À©¼»¬¿»©¿½ª½½¬»»­¿½©¿½ªÁ¿¬»¼¬¿¼¬Á¹¬½»¬Á½¬¾¼­¾»¬À¿©Á¼¬¾¾¬Áº¯¾½¬¿º°Á¿©½»¯¼½°Á½¯¾¿¬¿»®À»«¾»¬¾À®Á½±Á¼­Á¼¬¾¿³À»¯Á¿«ÁÀ­¾¾®¾¼®À¼®Á¾®ÁÁ¬Ã¿¬¾½¬ÀÁ³Ã¿®Ã¿¯Á½­¾¾²Ã¿®ÁÀ°¿¾°ÁÀ¯ÁÁ¯ÁÁ¯Â¾¯À¾¯¿À¬Á¿­Á¿¯Â¾¯ÁÂ±Ã¿¯ÄÁ®ÀÀ®ÆÁ°ÃÁ®ÁÀ­ÄÁ®ÃÁ°Â¿«¼¼©»¼¬»½¥¼º¤´³¬wkkfiz_~r]wqUwlSuuS{q[zu_~{b{i~oqo{twxworbxfYqdSniOkbSl`Ok[Sn`OlbQrqUqu[rlWnfOnfQlbKkbMi[Mi]Oo`Fi_Dk_OndOfgOkdMliSogUnfOlkOqlSntYuwUwuQwu[utSxwYw|Y{{S~`rºÐ¬Ü¡³ë¬¼ô³Çú¿ÊúÁÒúÅÔúÈÙúËØúÉÛúÌÝúÏßúÐßúÑÜúÎßúÎßúÒàúÕãúÖâúØäúÜçúÜêúÞêúßìúâíúßïúäïúáïúæðúæïúäïúãñúéòúéôúïõúîõúðöúïöúïõúñøúôúúïúúðöúï÷úôøúôúúô÷úó÷úõúúôùúô÷úóùúöúúöúúõúúñøúó÷úóøúõøúôúúòùúõøúóøúóøúòöúòúúôùúò÷úó÷úñöúðõúîõúêñúêñúæíúçïúâëúáéúÜèúÝçúÚåúÛåúÔáúÕàúÕÞúÕÝúÓÝúÓßúÐÞúÎÜúÐÛúÐÙúÊØúÍØúÎØúÉ×úÈÖúÊÖúÈÕúÆÕúÊÒúÅÒúÅÒú½ÏúÅÎúÀÎú¾Ìö¼Ëõ¿Èô»Æñ·ÄðºÂë·Áì·½ç±¿ã°¼ß®¶ß¦¶Û¨·Ò¤¯Ð «É­Á¦³¨{tol|w_xq_urYuoUwgYroWqoWnk[rlUun]ogUliOniSi]Kf`OifSkfOlfOf_MggMidSi`OgfUlgQodQkiWkkSokQoiQniSod_qw`uu|~uun~bzlU{n[nxizd|r`{tb{~`|r`xrf{~l|l|f|x`{f¤¥·¯·Æ·¾È¶ÁÃ´ÃÆ²ÄÇ³ÄÇµÆÇ·ÈÅ´ÈÊ¸ÃÈµÈÈ´ÈÈ´ÅÅ´ÈÊ¶ÆÆ·ÆÊ·ÉÈ´ÉÈ³ÅÃµÈÅ¸ÈÄ¶ÇÈµÆÆµÆÅ³ÆÂ¹ÈÄ·ÃÇ´ÆÆ³ÃÈ·ÉÆ¸ÇÆ¸ÉÆ¶ÉÆ¶ÇÆ¶ÆÊ³ÈÇ·ÇÆµÇÅ·ÊÅ´ÆÈ³ÃÂ´ÆÃ¶ÅÅ´ÄÁµÆÄ¶ÄÅ¶ÆÆ·ÇÇ³ÅÆ³ÅÃµÅÃµÄÄ³ÆÄ³ÅÂ³ÂÅ±ÁÃµÃÀ±ÂÆ°ÅÁµÃÈ³ÃÁ¯ÁÅ´ÃÃ³ÆÀ±ÁÁ¯ÁÁ³ÃÄ°ÃÀµÃÂ²ÂÃµÃÁ³ÁÂ³ÆÃ²ÁÂ´ÁÂ³ÁÁ°¾Â°ÃÁµÃÂ²¿¾¯ÁÀµÃÂ³ÂÁ²ÂÁ³À¾±ÁÁ°ÃÀ³ÂÂ¯Ã¾¯ÃÁ¯ÀÁ°¿À­¾¾±ÁÀ±¾¾³ÂÀ³À¾°ÀÁ³ÃÃ¯À½®¿¾±¾Á®ÀÂ°ÁÀ¯ÂÀ´¼À±ÂÀ­ÁÂ°ÂÀ®À½°ÁÁ°À¾°À¿²ÃÁ°Á»®Â¿¬¾¼®¿¿®»Á²Á¼­½¾¬ºÀ¬ÁÂ­¿¾­¿»®½»±À¿¬½¿¯¾¼­½¾¬¾½®¾¾¯Á¾«»¹®¿½­¿º©»¼¯»¼¯¼»®½¹®¾»§½¼¬¾»®½º¬½½¯»»©¾½­º»­»»«¾º®»¼­¼¼ª½»«¸ºª¿º«»¹¨º»¬»¹®ººª¾¶¯¼»©»¹¬½¸®»»¨¾¹¬¸¸¬»º¨º·ªº¶©»¶©»¹ªº¶¬»·¨ºº¨º¸¬º»ª¹´­»·¨»·©·»¨¸¶¨¹¹«º´«¸·ª»¸¬º¹¨·´«·¶§»´¥·¶ª¶·©¹µª¹µª¹µ¨µ³§¶¶¨·´ª·´¥¶µª·µ§¶³©··§¹¶¬¶´¨¶·ª·¸©¸³©¸µª³£«©°©¯¬³­³ª°ª´¬´¬³­³©³®´®²©³¬¶­³¬ ´«²¯±­±¬²«²ªµ¯³¬µ¬¶¬ ³¯³¬µ¬´®´¬³®µ®µ®³­´¬¡¶¯²­ µ¯¡µ±³®³¬·² µ±·­°­´«¢µ±º­·¬¸²¸¯ ³®·±£·¯ µ± ·­¶¬·°·² ¸¯£»®¡·± ·¯¢µ°¡¸±¡·´¡¸²¨·®»¯¶³£·µ¥¹°¢·³¤µ²¢¹°¢·±¡º³£º°£»³£¼±¡·±¡¹´£»³¢»±£»³ º² »³¤º·¦¸²£·¶¥½¸£º²¤»²£¹·¥¸µ¤··£ºµ¥¾µ¤»µ§¼µ£¼±¤¼¹©¼·§¾µ§½´¢¹³§»³¥½µ¢»³¥¿·¤»¸¥»·¨½¸©»¸£¾³©¿·¦»·¦½·¥¾¹¦¼»¥¼·§¾µª¿º¥¿¶©¾µ¥»¸¦½¸©¿¸«¾·§½»§½·©¼³¥¿¹¥»¸©»¹¦À·¦¼·§½º§½¸ª¿·£¾·§¾»¨¿·¦À·¦¼»¦¾º¬Á¹ª½·¦À»ªÀ¸¨Á»©¿º§¾¶©¿»ªÁ»ªÀ»©¾·¬Â¸©¿¸©À»£Á·§¾¹ªÁ·§À¸¦Á»¬¿¸©Á»¬¿¸¨¿»ª¿»«¾¹§¿¸ª¼»ª½¶ ¾³¤»¸¡¸³¢µ®³¦¦zi~`zd|_tY{lU{fQxdKugFtgOzfKzrO{wYkfqittkkd{fgQrYIt[Ig[BgSIkY?gY?i[?lbFl`MngMl`BnQ?kYFgYBfQDkW=dQ?fY?dU?kSBiYDk_Fn[Fn[DqY?k[Do[FqdFtiMuoOtkKtoMtlKutMwrKzSf©wÄ£Ó±â»î¬Áõ¸Èú»Íú¾ÎúÂÖúÄÔúÅØúÆÚúÈÛúÇÜúÈÛúÉÚúÊÝúÇÝúÍßúÑáúÑâúÕäúÖâúÙæúÙçúÜçúÝçúÜêúÜìúÞêúàéúàîúãîúãïúâîúäðúêôúéõúêôúèõúìôúëõúë÷úë÷úêóúêöúïõúïöúëöúíõúìöúðöúî÷úïõúïöúîøúíùúî÷úíøúëøúðùúòúúðöúðøúðøúñ÷úñöúíöúîöúïôúíõúêóúæôúçîúâíúáîúàêúàéúÚèúØæúØãúÕäúÒàúÒàúÒßúÎßúÒÛúÏÙúÑÝúÌÛúÐÙúÌÕúÈÛúËØúÆÖúÈØúÈÕúÆÕúÅÓúÀÐúÄÒúÃÕúÆÏúÂÎúÃÎúÃÒú¾Ìø½Ìö»Êö¸Çõ¹Æð¸Æí²Ãé²Àä®Àáª»á¬»Ý§ºÚ¡·Õ¨´Ø¥´Ð¬Ê¬Ç©º£³£wlkz[{kQugQxkKt`OnbKqfQo`IofOq`QnfIq`Il_SlYDiU?gMDiUDiY?lUBgQBgS=dUDiUBfWFg]DiMIg[Di_Kk_Il_Il[Fn[QnlOti[wznr|zo~okzYiQt]Mwg]u~`znYxfU{nY{r]~tWr]{r]{oY~qWo]{u ¯¦°¿°¿Ã®À¾¬Ã½±ÃÄ°ÃÀ±ÃÁ²ÅÄ²ÆÃ²ÇÁ³ÈÁ°ÅÃ²ÈÁ²ÆÀ±ÅÁ²ÃÁ³ÆÁ®ÅÃ³Ç¿²ÅÁ±ÈÁ°ÃÂ°ÆÁ²ÆÂ¬ÅÃ°ÆÃ±Ã¾¯ÆÀ²Å¿¯ÆÁ®ÅÂ¯ÅÁ²ÄÂ°Ã¾°Ç¾±ÄÁ°ÃÀ²ÅÃ°Ä¿®Å¿­Ä¾±À¾¯Ã½¬ÃÀ¯Æ»®ÃÁ²Æ¾®ÃÀ°ÄÀ°Á¾¯Ã¾¬ÃÁ®Ã¾¯Á½®Á¾­Ä¾®Á¾®Ã¾¬¾¿®Ã¾®Æ¾¬Á¾¬À¾¬Áº¬Æ»®Á»­Ã½®Á¾­¾¼¬À½«Á¾®Á¾®Â¼¯Ã»¬Àº¬Á½¯Á¾®Àº­¾¹«Á»«¿»®Áº¯Å¹©À¼®Á¹­Ã»©Á»®Áº«Á»ª¾»©À»¬¾·¨¾¸©¾¸¬¾¹­½¼¬Áº¬¿·ª¾º¨¾»¬¾¹¬¿·©»»«¾º«Á»¨¾·«Á·¬À»¬¾º¬À¸ª¿¸«¾»«¼¸«¿¹¬À¸«»»©¾º¬¾·«»¸ª½¶­½»«¾·©»·©¾·¨¼¹«½·«¼¶¨½·ª¼·©»·©½·¥¾¶¦»µ¢½´¥»µ¨¾³¬»µ§½¶©¿¶§½¶¥»³©º·¥»·©»´§»º¬»³¦¸³¬¹¹§¼·§¼´£·µ©¹µ¥»²©¼´§¼²¥·´¦º³§»µ¡»·§·´¦¹µ§»µ¦¶±¨½²§¸´¨·³©¸³¤·²¢·²§·±¦½°¥¸´§µ²£¹³¦¹²£·²§»²¡¸³¡¸²¤¸´£¸³¡¸°¥º³£µ±£¸±¤µ® ¹¯£³®£º²·¯£¶®¡·±¡¸­§·±·²·²¢´±£·¯¢¶°´±£·®¡¹²£µ°£³°¢·¯¢µ¯£³®£²­¡¸¥¤¬±£²´¤³¯ µ±¢µ°³³¤³±£³² ¶³¢²°£³³ ³±¦´¯¥³°£³² µ°¦µ±¢·³¡·³¢³²¥³µ¢´´¥¹µ¤³°¡³³£·³¦·³¤³³¡³´ µ³¦µ°¥·² ³´¥¶³§´³¤³³¥¶´§·µ¦¸µ¥¶±¥·³¤¸²¥·³¦º³©´µ¦¶¶§¹³¦·±¥¶µ¤·³¥·¶ ³´¦´¶¦·µ¦¹³¢ºµ§¹³§·¶¦¸¶¥¶¶¦»·¤»¸¬·¶©¹·¥»¶¨·¶ªº¹¨ºµ¥·¶©¹´§¹¸§º·©·³¥»º¨»µª»µª»¹§¹·¨¼·§·»§º¶§»·©½¼¬¾¹¨º¶«º¹¬ºº¨··«º¹¬¼º©»¹¬»»¬º½¬¼»­¾º¦¹·ª¾¹ª»»­½»¬¼»«»»ª»¼©»¹¦»»¬½º¬½·­¾¸ª¾¼¬¼»ª¼¹°¾º«»º¬¿»¯¿¼­¾»¬¿¼®¾¼ª¼»ª¾º¨»¹¬¼À¬¾½°½¼¬À¾©¾½­¾»¬Á»¬¾»©¿¿³Â¾¬Á»ª¿»¬¿¿§¾»¬Á¼®¾¼¬Àº¬¾¿­À¾¬¾¿®½¿«¿Á¬½¼­¿¼«À¾­¾¼¬À¼¯¿¿­Á¼¬¾¼¬Á»¬ÃÁ¬Á¾ªÀ¿¯ÀÀ¬À¾¬ÁÁ®À¾¬¿À®Á¾°¿¿¯Á¿³À¿­Á½°ÂÃ­¾À°Á¾¬¾¿¬Â¾±¿¿®À»¬À¼®À¼¬½À¬½¸¨º·¨»¹¦º·¥¶¯ª£zwfkidzb{oYwnUuoYuoYtt]{zbkxuwowxqxorkznUqbStfUnbOk`Sn`On`QgfKofSniWqo[lbMn[Mk_SfdQn[Qf]Kk_FgbKiYKkbSlbQnfQnbQkgSnkMnbSlkUtoSuw[nzWtoUutYq{Y{]||]~i¤t½£Ð®à©·ì¬¿ô·Æú¾ÎúÂÕúÈÖúÊÕúÎÖúÌÜúÎÛúÌÙúÍÝúÍÜúÐÜúÍÝúÏßúÓáúÓáúÙãúØåúÞäúàìúáèúÝêúàëúâìúáìúâïúæìúæïúéïúäòúèñúèóúìôúîóúïõúï÷úíöúïôúð÷úïöúïõúò÷úð÷úñ÷úñõúñøúò÷úòøúðùúïöúôúúðúúñùúòøúõöúñöúôúúõùúô÷úõùúöøúõ÷úöùúòøúòöúôöúóöúîôúèñúéðúçðúæïúäìúãéúáéúÜêúÙäúØäú×áúÕâúÓÞúÓÞúÕßúÒÞúÒÝúÒØúÓÚúÔÛúÍÙúÐÜúÍÖúÌÛúÈÖúÊ×úÌÖúÊÔúÉÒúÊÒúÉÑúÉÑúÆÑúÆÑúÂËúÃÎú¾Ëö½Çö»ÇôºÄñ¶Àì³¿ï¶Áé³»ã¯»ß­¹à«·à­·Õ¨´×¡­Ï¤¬Æ©Å£»®¨|onf~{`{n]toUroWrn]okYoqYukWkiUloUiiSqf[niSn[Od[Qk`QifOfbSk`Od]Kf_SgbQfbSngQg`MkdOniUndSflSofSndYngYuodw~n~x~|zttlx_{iSxobu{k{zg|u_xxbzg{ixk|{k~wd|zfg|t¯§¬À³»Æ²ÁÅ°ÂÃ¶ÅÆ³ÃÈ¶ÆÅ¹ÈÇµÃÃ¸ÇÆ¶ÆÆ³ÆÊ·ÅÈ¸ËÆ·ÇÇ´ÆÃ¸ÇÉµÄÇ¹ÅÈ·ÈÅ³ÇÄ·ÆÃ¶ÆÄ¹ÆÅ´ÆÇµÆÆ¶ÆÄ·ÅÅµÃÃ´ÆÆ·ÆÆ¶ÈÅ¶ÆÅ¶ÄÇ´ÄÅ·ÆÄ·ÅÅ´ÅÆµÅÆ¯ÆÅ´ÅÁµÅÁµÄÄ·ÃÄ±ÃÁ¯ÂÅµÇÆµÆÃ³ÃÃ´ÅÁµÇÄ²ÄÃ³ÃÃ¶ÃÃ²ÃÃ°ÄÃ³ÅÂ³ÄÅ±ÁÃ³ÂÂ³ÅÃ³ÁÅ¶ÅÃ³Ã¿¶ÃÂ³ÄÁ±ÂÀ³ÃÃ±Á½´ÂÂ²ÂÁ³ÅÄ³ÅÁ´ÆÁ¬ÀÃ°¿Â°À¾°¿¿³ÁÁ³Â¾±¿¾±¿¾³ÂÁ±ÁÀ®¾½±Ã¾¯¿Ã³Ã¿¯À¾°À¾±ÁÁ°ÁÀ®¾¾­ÀÁ¯ÁÁ¯Á¿¯Á»¯À¾°¾¾³¿¼´¾¾¯À¾²ÀÀ±Á¼³¿¾®½Ã°À½´¿½³¼À³¾¼°Ä¾®¿¾®À¾²Á½±¿¾±¿¾­¾À¯Á½²¾¾¯¾À±¾»¯½¼®¾½°¼¾¬¾½­¿»¯¾¾¬¾¼­»»°¾½®¼½«»º¯¼»«¼¼¬»»°¾¼®¾»¬»»¬»½­½·­¹¹¯¹¹®»½©½·¬Á»­¸»­»»±½»¬»»¨¾»®¾»¬½»®»¹¬½·¬¼»­»¸¬º·©ººª¸»¬»·®»·¬»»ª»·®½·«º¶«»·¬»¸§·¹ª¹·¨º·ª¼¸§º·­ºµ©¹¸¨¼·©»º¬··©¹·¨¹¸¬¼¸¨·¹«¹¸©··©¹µ«º·¨¸µ¬·¶¬º¶§·¹©¸·§··£¶´¨¶µ©¶·§·¶ª·¶¥µµ¨´³¥·´¨·´§¶³¥··¥´³¥µµ¨´´¤·µ§··ª¶µ©´¢¬©±«¯®³«±©²¬²ª´¬³«±ª³¬±¬¯­¯­²°³« ´ª²¬²¬´«³­±® µ®µª¡³°³¬³­·°·ª ¶¯µ­ µ¬³¯´¯´¯µ¬¸°´°´® ´²´±µ¬µ¬¢·¯·­·¬µ°·¯¢¹« µ± ¸³£·°·±¡µ°µ³¸²µ²·¬¡¹²·°¡·®¸²µ²¦·²¡¸­¹®£·± ¸³¡¸°¡º²¢·²¢·´£¸¯·² ·²¡»² ¸¯ »¯ ¸±£»²¡¹®¢¸µ¥¹°¤¹³¡»µ¢¼°¡¸·¢»³£»¯¤·²¢¸´¤¾³¤º³£»³¢»³¥»±£»´¢½³ª¼±§»¹¨½´§·¶§»¶¦»¶¤»¶¢»·¥¹·¨ºµ¤¾³¥¼µ¥»µ¥»´£»´¦½¸§¾³§¼³¡¼³¦¾¸¥¼¸§¾·¦»·¦¾µ§½»¦¼·¨¿·¦¼³ª¾º©¾·¤¼µ¥½¸§»µ¤¾·¨½¶¦À·¤¾·¥½´§½º¤½¸¡¼·¦Á¸«¾¸¦¾µ¦»º§Áº¦¿·¦¾·§½»§¾¸«¿¹¨À»§À¹¨¾½¥½·§¾·§¿º©¾º¬¾¹ªÁ»¨¾¹¥¿·«Ã¸©Â¹¤¾»©Á¸«Âº©¾º©Á¼¨Á¼©À·¦¾¹©¾·§Á¹¦¾»§¾·¢¿´£º³¸±´¬±£¢{fd|dbxbz]|gMzdMz`QurQwgQxqU{`didz`zdonkqb`[q_FtWIidIoWFlUDg]DiY=lUDg]Fk`MidIgYDkKBlUBgWDfMFiU=gU?dUDk[?g`DlYDl]Bn]Fi`Io]?tbFq`IqgMuoOrnMufKrwQzxSzxU{|Wg¬xÇ§Ö²ä¥»î¬Ã÷·Éú»Ìú¾ÐúÃÓúÇÙúÆÓúÇØúÈÚúÈØúÈÚúÇØúÉÚúÈÜúÎÜúÌÜúÏßúÒäúÔäúÙáú×åúÚæúØèúØèúÜèúÝèúÞèúàéúÝêúßêúáîúàìúáðúæðúëòúèòúçóúêôúêôúìôúìóúìöúìöúèõúìöúêõúïöúìõúíóúî÷úîõúí÷úíõúîóúïöúíõúíôúðøúïùúï÷úïöúñöúò÷úíöúêöúîòúîóúìòúæðúçðúáîúàêúàíúßêúÝéúØäúÕâúÕäúÕäúÕÝúÏßúÎßúÎÛúÍÛúÊÚúÏÙúÉÙúËØúÉÙúÌÚúÌ×úÉÔúÇÖúÈÕúÅÕúÃÓúÄÒúÇÕúÆÒúÄÑúÃÐúÁÎú¾Îø¾Îù¼Î÷»Êô¸Æò´Æì¸Áë°Ãê³Âæ¬¾â©»Þ©»Ü§µØ¥¸Ø¦°Ô¡³Ð °Ê«Æ©½£¹°¤xndw]~oWznOrdQwkIldKnfQrgQndOubQn`Kn`DkYMg`?iUFgQBfUDlWFd[IiQFgS?gWDgUFg]Fk[FiUDnWFi_Ii_Il]Dk]Dk]InbQqgUrzl{qnoqoi|[iWzdQx_Uti_x|[{iUzrY{zd{~`r`tY~tY|r[wYwg¤£·ª·¾­¾À«Á½¬ÆÁ±ÃÃ®ÃÀ°ÄÁ²ÅÁ²ÂÃ±ÃÀ°ÄÃ³ÆÃ²Æ¿²È¿²ÆÂ°ÆÂ³ÈÃ±Æ¿±ÆÂ²ÈÂ±ÄÁ­ÆÀ®ÄÁ°Â¾¯Ã¾­Ã¾²Ã¼­Ã¾³Ã¾¯ÃÁ°Ã¾³ÇÀ¬ÄÁ°Ä¿³Ä½¯Æ¾®ÁÂ«Ã¾¬ÃÁ°ÆÁ®¿¾®Ã¿¬ÁÂ­Æ¾¬ÁÁ°Â¾°ÅÁ²Ã¾«ÃÁ¯Ã½­Æ¾°Ä½®ÁÀ­Æ¼®ÁÁ¯Â»®Ç»¬ÂÀ®Ä¾®Ã¾¯Â¼®Ä¾®Â¾­Ä½«Á»¬Á»¬¾»«Á»¬Á»¬Â¾¬Á¼­Ã½¬Á¾ªÃ»¬¿À®Á»¬Á½¯Á»©Á½¬Ã¼ªÀº¬¾º®¾¹¯¿º¬Ã»«Á»¬»¾¬½¼¬À»©¾¸¬¿ºªÁºª½»¬¾¹ª¼¸«¾ºª¾»­¾·«¿»¨¾¸©¾µª¾º¬½¸­À¼©½¹¬¾¹©¾½«¾º­¾»«¼º¬¾»¬¿¸ª»¸©¿¶©¾»ª¾·¬¿º«¼¹¥¿¹ªÁ·§½¸ª¹·«¾»ª¾»¨¼¶¨½³©»·¦¼·¨¼·©½·¦»´©¾·ªº¸¨½·¦º¶«¼µ¦¼·¥¼¶§»¸©½¸ª»³ª»¸¨»µ©½³¥»³¦¸·§»µ§»´¤»¶¦º³¦¼´¥»µ§º³§»³¥ºµ¦·³£º´§¹´£¹µ ·³§·µ£ºµª¹²¦¸³¥·´¥¶®£»²¤¸²¦¶´£¶³¦¹µ¥¸²¨¸´¥µµ¡·³£·²£¸²¤µ²¥º±¤º³·²¤·³¥¶°¸²¤º®¢¸¯£µ²¤·±¢¸° µ¯¤·²¢¶±¤µ®¡´±§¹±§·²¢¸­¢¸² ·®¢´¯¢·®¡µ¯¡³­¡¶°¡·® ´°£³±¦·ª ©±¤³°¡´±¡µ®¡²®¢³³£µ± ´­¢³³¥²±¥µ¯ ³³¡³¯¤µµ¢´±µ¯§µ²£³±¢³´¡³²¢·¯¤¶³£·¯¡´³§´³¥µ³ ´°¢µ²¥µ³¨µ²¥¶±§··¦¶´¤¶·§¶´¤¶´§µ³ ³³¤³´¦¸±¦³¶§·²§¹³£¹´¤·³£¶³¥·´§¸²£·¶¤¸¶¤µ´¥·´¥¸¶§·³©··¨¶µ¤ºµ§¶±¨º´¤¸³¨¸·¤·¶¨º¹§»´¦»´¨··§·¶§·´©¹¸§·¶©»·¨¹·§¸¶§»·§»·§¸¸§¶·§»·§º¹©ºº¬»¸¨º¹§¹¶¬»»¬½»¬½¹©»º¨»¹¬¼¸§»»¬»¹ª¾·§½·­¼¸¬½¸ª»»¨º¹©¼¼¬¾»ª¾»ª¾»«¼»«½»©»º«»½¬¾¾«¹·ª¼»«»»¬¿º¬½»«½¼¬½º©¿½®½º¨¾½©»»­¹»®À¼¬¾»¬Á¹¬À»¬¿»¬¿¼°¾»¬¿¼«Á»¬»¹¨¾½¬¿»¬À¹¬Á½¬Àº¬¾»«¼¾¬¿º¬¾¼¬¼¾¬¿»¬Á¾­¿¼­¾¼±À¼¬Á¼¬À¾¬Á¿¬¼½ª¼¿¬½Á®Â¾°¿¾®Â¾®¿Â¬Á¾¬Ã¾­À¾°ÁÀ¯À¿¬Á¾¬Á¿­À¾®ÁÁ¬ÁÀ®Ã¿®¿Á¯ÁÀ®Ã¿¯ÃÀ­Ä¾«Á¿¬Á»­Á½¬ÃÀ­¿»¨À¶©¼»¦»·¥³²³ ~ooqoobo[zo]xq_{t]wn[z{]nurkgr¢{x{rwlzr_u`MobSkdQndQn[QldOi]SidIg]QkkWolQgdUkWOibQf`KiYQg_Mk_MgYSikOkbOig[ogMqfQngQokQnkQonUur[w{[twUxuYw`{`]d¤xÃ£Ö­ä©¹î­Âö·ÈúÁÍúÁÐúÈÖúÊ×úÊÙúÏÜúËÛúÏßúÎÛúÌÛúÐÜúÎÛúÌÛúÐÜúÓàúÒáúÕáúÕäúßäúÛåúÞæúÛèúÝçúãéúÞëúâëúãêúâïúæìúãîúçïúèïúïòúíôúïóúíõúíõúëöúïöúïõúïöúðóúïõúï÷úíôúóôúñôúïöúñùúòöúò÷úñøúñúúò÷úñ÷úòùúòøúò÷úò÷úóõúñ÷úðöúïôúïöúðõúìõúíôúëòúéðúçïúâëúâëúâëúßêúÝçúÝåúÜáúÙåúÙáúÖàúÕÜúÑÚúÐÜúÒÛúÒÙúÐÙúÐÚúÏÙúÎØúÏÙúÊØúËÖúÌÒúÊÒúÈØúÇÓúËÖúÍÒúÉÔúÈÒúÆÐúÆÐúÆÐúÀÐú»ÈúÁÊöºÇó¹Èó¶Âï³¾è¯½é±¼ã¬¸Ü­·ß¬´Ü­³Ú¦±Ö¥®Ò¡±Ì¬Æ¥¿¡·­rq{iw[{r[ug[woWno[qkYtkYlnWrlWlkSnlSkbSidMidQg]Qi`SlbQdbOfbOkbOi`UlbMfdQkgWidMkbQigQigQrdQldQk`Uln[qn`txr|xu~tqo{bq]zo[xtfxd~q`zqf{k{f~|gzub|wd|wdzf|{t¥ ²¨°Â±¼Á³ÃÂ²ÃÆµÆÅ´ÇÆ·ÆÅ¶ÆÇµÈÅ·ÇÈ·ÌÆ¸ÈÇ¹ÆÆ·ÈÆ¸ÈÇ³ÃÄ´ÈÅµÈÅ¹ÇÆµÈÅ¹ÇÆµÈÆ¶ÆÅµÃÆ³ÅÈ¸ÆÄ´ÆÆ´ÅÃµÇÆ¶ÈÆ·ÆÆµÆÈ³ÅÈ¶ÆÆµÅÃµÇÃµÇÃ±ÁÅ¶ÈÃµÂÆ²ÃÃµÆÅ³ÄÃ³ÂÂµÃÃ¶ÅÃµÂÃ³ÃÁ³ÁÂ³ÃÃ´ÅÃ³ÆÄ´ÂÄ´ÆÃ³ÂÄ±ÁÁ³ÅÄ·ÃÄ¶ÇÁµÄÁ³ÅÂ³ÃÁ°ÂÁ²ÂÁ°ÃÀ³ÂÃ²Ä¿²ÀÁ¯ÅÀ³ÁÄ°ÂÁ²ÃÁ®ÁÀ²ÃÀ³¾Â´ÅÀ¯ÄÁ±Á¾³À¿±Á»²ÂÀ°Ã¿³ÁÂ²ÂÁ­ÂÀ±ÃÅ³ÁÁ°Á¾²Ã¿°¿¾±À»°Á¾®Á¾³½¾³Á¾³Á¿¯½Á¯À¾¯Á¾¯¾¿²¿¿®ÄÂ²¾¼°Á½¯ÁÄ±À½°À¿²Á¾¬¾¾±À½°Àº¬¾¿°ÀÁ²ÀÀ°¾¾¬¾¾´¿¾¯Á»°¿¾³¿¾²¿¾®»¼²Á¼¯¾»¬½¾­¿¾¯½¾¬»»®¿½­½½«½»®¼¹¬»¼­»»¬¾¼®¾¹¬»»®¾»¬½¼¬»º­»¹­¼¼°»¹°¼»«»¹¬»»°¼»®½º¬¼¹­»¼«¼»¬¼¹­¸¹¬½»¬½¸¬¸´©¹»¬»¹¯¼ºª¸¹¬·¹§½¹¬º¶¬º·§»·¬»·©º¸«º¹¬º·ªº¶©¹µ§¹·¬¹»ªº½¬¹¶¨º·ª¹´¬º·¬º¹«¶´«¸·¨·³©¹·ª·¶§¹¶¬¹´§¸º¬»´ª¸¶¨¶¸ª¸´ª»¸©´·¨·µ«·´¨¶¶¨·¶¦·´©¸³§µ³«·µ©·³§µ·¨´³¤¶¶§¶·©¸¶©¶£¬©±ª³¬´©²©³¬²«´­°­²«³®´¬±«³«´¬³«³¬°¬³«³¬µ®²« ·¬µ¬µ«´° ´®´¬³°µ­²®´® ³«·¬ ´­²®µ¬·¬´°µ¬¡µ­³«´¬µ°¡³²µ¬ ·°·±¡µ¯µ®·®µ°µ°·­£µ± ¶® ·¯ ¶¬µ² ¸² ·°¢»°¢·²¢µ°¢»°¶¯¡¶² º±¸°£·° ¸²¥·´¡»³¡¸®¢µ° ¹³¢·²¤·³¹²¥¹³¥»´¸³¥»³£¼´¥»µ£¹µ¤·¶¡·°¤»´¤»·¦½´¥º³¤»³¢¹³¥º³¡º²¤º·£¸³¤»²¥¾³¡»·£¼µ¡»µ¥¼¶¥»³¨½¶¥¿´¥»³¥¾·£¼³£½·¥»³¤»´¤»¶¤¾´£½·£½·¥º·¥½·¤½³¥¾·¥Àµ¥¾º¥¼·§»¶¥¾·¤¾º¨Á·¤¾¶©»¶§½º¥À·§»·§¿»«À»¦º·§¿¶¦½¸¥¿º©¾·§¿¹§¼·¨¿¸§¾·¤À»¨¾µ¥¾º¬¿»¦À·«¾·¨Ã¹«Á¹©Àº«Á»©¾¸©¾·§½»¥¾·«¾·©Á¹«Â¹£½½©¾»¨¼»ªÁ»«¾º¥À·¬Áº¨Â»©À»«Áº§¿¸¨¾¸©¾³¾·¤»·¡·¯®£¨rdfng{`{qSzfQwiMxfOwgOxlOzkQ~zb_d|`|dqztr|`~f`tlKrUMl]FkUIl[InUBgYDfWBiWDl]DkbKkdIkU?gMBgU?`WDdU?gW?iW?gSDgWFk[Bl[Bl`Fo]?nYIk[Fo`IqdFqkIunMunMxtYtzY{|U~Yf°~É¯ß¡µæ¤ºï®Ãö¶Èú½ÏúÀÒúÄÒúÉÖúÈ×úÉÙúÈØúÊÛúÊÛúÊÙúÉÚúÊÜúÈÛúÊÛúËÝúÌàúÌàúÎßúÑßúÖàúÕãúØäúØåúØçúØæúÛçúÚçúßèúßìúàëúàíúáëúãîúçðúèòúçôúéòúëóúëôúêõúèôúíõúéóúêôúêñúêôúêôúêõúëóúì÷úìõúïöúî÷úñöúîõúëöúëôúìõúëõúêòúëóúêòúéòúëòúëôúêóúâïúàîúãíúÝèúßêúÝæúâéúÚèúÖäúÔâúÖàúÏÞúÑÝúÎÛúÎÜúÍÙúÊ×úÌØúÊÕúÇ×úÈØúÊÖúÈØúËØúÆÕöÇÒúÈÔúÃÕúÃÐúÃÓúÃÒúÃÑúÆÒúÃÑúÂÑúÀÒúÁÏú»Ìø»ËôºÇò·Ãî·ÄîµÁê±Áå¬»ã©ºÝ§»Ú§´Ö ´×¤³Ô¦°Ñ¢°Ê«ÇªÆ¥À£°¦rg|_nYzqUrfQu`MrgMqdOn`Ut`MogIf]Mq_?g]MgWId]FgS?gUDgYDf]Id[Bf[BlY?i[DgYDiWDi[BgUFk`IngFg[Kn[?nWIi`QkYSrrf|rqtxnf{iwYdWwkY|lYzzYxrUxiUxn_|t[|qWzoQzkS{nW|qY~t]o¤µ©·½­½¾­ÄÂ®Ç½¯ÅÃ®ÆÀ²ÆÂ¯ÆÁ°ÃÃ³ÆÃ­ÆÁ®ÆÃ±ÄÁ±ÆÃ¯ÅÄ±ÄÁ¯Ã¾¯Å¾®ÆÃ®ÄÀ­ÇÁ²ÄÀ®Ã¾²ÆÃ®ÈÂ¬ÃÁ°ÆÀ¬Ã½²ÃÁ¯ÄÀ³Ä½¯ÇÁ²ÂÀ±ÂÃ°ÇÁ¯ÃÁ¯Ä¿°Ä¿®È¾¬Ä¼­Á¼®ÃÀ®Å¿­ÄÀ°Ã¾¬Ä¾¬Ã¼¯Ã¾±Ã¾±Ã¾¯Æ¿¯ÆÀ®Äº®Á½®Æ¾­Ã¿²Â¾®ÃÀ¬¾¾±Â»­Á½®Ã¾®Á»­»½©Â½¬¿»®Ã½¬Ã»¬À¼¬Ã¼­Ã»«Ã»¬¿¾¬¾¾°Á»¬À¼¬Á¾«Â¼«À½¬À»ªÁ»¬¿¾«½¹ªÁ»®¿¹«Â¼¬Á»­Á»­»¹ª¼»©½¹«¼¹©¾º«Á¸©Á½­¿¹«Áº§Áº©À¹¬À·«À¸«Á»©»º¬¾»«½¸©À·ªÁº«½¼¬¾¹ªÁ·«¾¹ªÀ½¬Á»¬¼»¬À¹¬»¼©À»¨¿¸¬½º¬¾¸©¾»©À¸§Áº¨»µ«À¶©»¸¨¾·ª»¶¦¾µ§º»©»»¦½·¦»·§»³«»¶©»·£¸·¨»·©¼µ©º¶§»¶©¼·§½¶¦½µ¦»³§¸µ©»·£»µ§»µ£»¶¤º³¦¶´¤º´¦¹µ¤»³¤¸´¤¸³¤º·¨ºµ¤·²£·°£¸·¥¹±£»³·³£»´¥·³¡º³£·°¤·²£¹³§·°¤º±¢º°¥¶¯¢·°£·°¥¸®£¸³¤·³¢µ³¢·³ ·³£¸³¦·°¢º²·²¤·²£´¯£´´¢·² µ¯¢·²¢·²¢·²¶®£´¯¡³°¡¶² ³¯¡·¯£¶¬µ°¦µ±¢³°¡µ­¥¶«¡­±£³²¢´³¤´¯¢²²²³¦²±¢±±¤³°¤´­ ±¯£´³£³± ¶³¡³°§±³¡¶´£³³¢µ±¡²°£³²¥µ³¡¶³·°£³µ§´³¤·´¤¶´ ²´£µ³¥¸³¢¶³£¶²¥´³¦´³¡µ²¤´´¢µ³¦³³¢·´¢¶´¢·³¤µ³£·³¢µ´¡·³§¸³¤¸µ£·³£·³¤¸¶¤·¶£¹·¦¹±§¸²¦·²¥¸µ¢·³¤·³¦·³¦·¶¨··¨¹¶¦¶³¨¹´¤¸¸¬»µ¨»´§·¶§¶·©·´¦º·¨º¶§»¶§¶º§»¶§»¶¨»·­º·¨º¹©¼·¦·¸ª»·ª¼¸¨»»©¼·©»¹ªº¹§½¹«¼º¬½¸¨»¸©»·ªº»©·¹ª¿¸©»º¨»·¬¼»©½º«º»ª»»®¿º©½¸¦¼¶­»º¨¼½¨¹·¬¼»©»»§»º«¼»¬¾»«»»ª¼·ªº»¬½¼ªÀ»®Á¼¬¼»®À»«¼½«¿½¨¿»¬¾½ª¾¿©¾¼¬¾¸§¿¾¬¼º®¾»¬¼¾ªÀ¼­À¾­¿»­Á¹­¿¿«¿½¬Á¼¬¾¼­¿¼¬Á¾¯Á½©À½­À¿®½½«¾½¬¾¾¬À¾®Â½®Àº­Á¼«Á¼¬À»³ÀÀ®¿¾°Ã¿ª¿¾­Á¾¬¾¾­¿º­ÂÃ°Ã¾­¿¼²ÁÂ¯ÀÁ­Ã¼­¿½¯Á½®¾¿¬Á½¬Á¿¬À¾¬½½§º¶¤·¶¤¹¯®§©~trurizb|tUxrQwo[urWwq`zwYxxbokfknu~{rwd{g_odUl`[ldQnfSk_Qk`KifMfbOlbQlgMllUnlUg[KkUOi_Kg`Of]Ki_Mi`Ql_SkbQkbKkbQlfOngKlgQldOtfOolOqu[utWuw[t{_w[{]d¦uÆ¦Ü¦³è¯¼ï³Áö¹ÈúÁÍúÅÎúÆÖúÊÖúÌÖúÌÚúÐÙúÐÚúÎÛúÎÝúÒÜúÏÜúÎÜöÍØúÌØúÏÝúÒÝúÕßúÖßúÐàúÕßúÔãúÖãúÛæúÝäúÙäúßçúàèúâéúâíúæìúèìúçïúèîúìïúìòúêñúíóúíôúìõúíõúíóúíôúîõúïõúìóúïôúïôúíõúðõúñ÷úïôúñ÷úñöúòöúòøúðöúðöúïöúïõúïôúïôúîõúïôúòðúíòúëñúæíúäïúãêúãêúãëúáéúàçúÙçúØäúÙâúØàúÖâúÕÞúÓÞúÑÜúÑÛúÏ×úÐÛúÊØúÌ×úÏÚúÐÖúÎÙúÐÙºÜ dìT¸ØúÈÕúËÓÄÕ¨áqåjßÖÓ¶úÉÑúÉÔúÊÒúÂÐúÁÊú½ËöºÈô¸Æð·Ãì³¿ë³¼æ¯»ßª¹Ü¥¶Ø§³Ùª°Ö¨²Ò£®Õ£«Î¤¯È¦Æ º¯|qi|g|q]wqYtiQrnWqkSl`YtkSrlOlfSogMlfSi_KlfMdbOg]Qi`QkfSibQgfMg_Mg`Qf`Qg_KgfSgdSlfUikSldUnbQn`SibQng]uxk~wx{|wnt~iwdzr_r_xzfut]xq[zx`zwg{fz`zr]zrf{xgwgq¤£¸­´Â´¾Â´ÅÇµÆÇµÆÇµÈÈ¸ÉÆ·ÃÈ¶ÆÅ¶ÇÆ¶ÂÈ´ÈÈ¹ÆÆ·ÈÄ¶ÅÆ³ÄÇµÄÃ³ÈÆ³ÃÆ·ÆÈµÃÅ¹ÉÄ³ÉÈ¸ÄÇ´ÇÄµÈÃ¶ÈÆ´ÂÇ³ÆÆ´ÆÄ±ÄÃ³ÅÃ³ÅÅµÃÃ¶ÆÅ³ÃÅ³ÆÁ´ÅÅµÆÃ³ÅÃ´ÃÃ³ÂÅ±ÆÃ±ÃÆ³ÈÅµÅÆ´ÈÁ³ÇÂ³ÆÇ·ÆÄµÃÃ³ÂÆµÆÂ³ÅÂ°ÆÂ´ÆÅ´ÆÅ®ÅÃ´¿Á·ÅÂ´ÂÃ³ÅÁ°ÂÁ¬ÁÀ²ÄÁ¯ÂÁ´ÂÁ¯ÁÃ²ÅÂ´Ä¿®ÂÃ³ÁÁ³ÁÁ°ÂÀ±Â¿±Ä¾°ÁÁ³Á¿¯Á¿°¿¿³Ã¾­ÁÁ²¿¿­ÀÀ²Á½´ÄÁ¬½½°½½¯À¾°¾¾®Á¿®À¾°ÁÀ°ÂÀ²ÃÁ²ÁÀ¯»¿¯ÃÀ­Á¼¯À¾±¿Â³ÁÀ³½½­ÀÂ±¾À­¾À®ÀÀ°¾½³¿À²¾À®¿¾­¾¿°Á¾¯¾½®»½¯¼¼¬À¾®Â¼±¿º¬Á¾¯¾»¬¿½®¿»®¿½®¾»¯»¼­¾¾¬¼º¯¿½²½»¬¼¾­»¹¬º¾¬¼º®»¼©¾¾«»»¬¼º¬»¸¬½º¬¾½°¿»¬¾º¬»·¬»»«½·®»»¬»º¬»»ª»¹¨¼¶©¹¶ªºº«¼¸©»¹¬º»©ºº¨½µ©»¹ªº·«»·¬»»¨»µª¾¹¬·¹¨¹¶¬»¹¨¸¹ª¸·©¹µ§¶¸¬º·ª¹·«»³©·¸ª·¶¨¶·«··«»¶ª³¸¬·¸§¹³¥··¨´·§·¶¨¸·¦ºµª¸¶ª»·ªµ·¨·µª¸¶¥¶µ¨ºµ¦´´¨µµ§·µª·³¦¶¶§¶µ¨¹·§·³§´¶§¹´ª·¹©·³¬·¢­©²«±­³­²¬²«³«±¬µ­±®°®³®²¬µ¬³®²« µ¬±¬ ³­´®±¬³¬²¬·¯³«²«°¬µ®¤³±³¬³°·­µ¯³­µ²±­µ®µ¬±®´¯¸®´®µ« ´® ¶­´¬µ­·°µ¬¶¬³°µ±µ­·­³°¶±³­·® ·°·°¡¸±¥¸¬µ²·° º­¤¶±¡¸±¢»±¸®º²¡µ±¢¶°¹³¡·³¡·²£º´¢¸¯¡¸®·´»³£·²ºµ¢¹³¢»°·µ¤»³¥¹³¤»µ£»¯¡º²£»³ »³§·²¤¶¶¢»·¡½µ¥¹µ¥»µ¥»³§»µ¤¼´¥»´§½µ§»·¥¼µ£¹¶¤¼¸¢¹µ¥º´¤¼· ¹´£½µ¦º´£¼´£½³¢»´¤¼¸¤¼¶¦¾µ©¿µ¢»·¥»·¥¾µ¦»·©¾º£½·§º·¥Á·¥»¸¥»³¥»¹§»¶¤»¶§½³£½·¨½·«¾¸©¿·¦»µ©½¸¦Â·§Á¸§½¶§¾º¦¾·¨½¶§¿»¨¼¶«¾»§Á¸¨¿¸¬À»©Àº§À¸¨Á·«À¸¨¿¶§¼º¤¾»©Àº§½»¦½·¬Á¸¥¾¸ª½¸¥Áº¨À¼¬¾º§¿¸¤¾º¨¾»©½º¢½¹¤À³¤¹¯·²°¦© ¢{nlib|YoU|gMulO{gQunSwqU{nO|u_{gf|Yx[fttkw[zgUu]InQFkWId[Dn[DkWFiWDgYBgYBbUFgYFo`Fn_IlUFiS?fS=fUDdSDiUDgS?kUBg[Bn]Dd_Bk[Ik]Fk_?l_Fr`DqkMtlMqkIxnQquM{wQ~Uo³Î«ã¡¶é¬Áñ²Äù¼Èú¿ÐúÂÒúÅÕúÆÕúÇÖúÆÖúÈØúÇ×úÊØúÈÛúÌÛúÊÚº×¢déW¸ÚúÊÜúÎÙøÎ×ÀÚ«uèfÁÚ©øÎÚúÐàúÒÝúÔáúÖâúØâöØáú×âúÜéúßèúàèúáçúâìúæðúçîúçïúêðúêñúåñúçîúåñúçñúèðúçñúèòúçòúèðúçóúêóúíóúîóúëõúîõúîöúìóúðòúíõúëõúìñúèðúèïúêïúìïúèðúæíúâìúáêúÞéúÝèúÚçú×âúØäúØãúÖÝúÑÝöÐÙúÑÜúÒÛúÐÙúÎØúÌØúËÖúÌÙúÊØúÈÕúÈÕúÈØúÊÖúÊØà~-õ%Cð;+ö%ß|öÈÒXìJ+õ$(ö!Jï>²×úÄÔúÆÔúÃÐúÁÏ÷»Êö¹Èó·ÄïµÂê±Ãä¬¿á¬ºß§¸Ý¥¹Ô¢¯Ð ²Ò¯Î¯Ì¬É­È«È¨Ã¤·¢«xl_z_kUxgMrdQqdMt`On_Fk]In_Kk`Il_IgWDgUBfY?gQ?`QFd[Ki]=gYIgUDgW?fQIdYDkYIbYDgYDl[Ii`Fk`Fk]InYDk[Dl]Qon]x~ornrk~idgzWdQwgSziQ|kStdOxkUxtU{u[{rU|tUwnY|k]x`xg|­£±¼©¾½¯ÀÀ¬ÅÃ°ÄÁ°ÇÂ°ÆÂ´Ç¾±ÃÁ¬ÆÂ°ÃÁ°ÃÁ¯ÇÀ¯ÆÃ³ÃÀ°ÄÃ±ÅÁ°ÆÃ°ÆÀ³ÃÃ²Æ¾­ÄÂ³È¿±ÄÆ±Â½®Ã¾°ÅÃ°ÃÁ°ÅÀ¯ÆÃ­Æ¿±ÄÄ°ÁÀ°ÆÃ°ÅÁ¯ÃÁ°ÄÁ°ÄÁ®Á¾®ÃÁ­Ä¿«Á½±Á½¯À¾²Æ¿®ÁÂ°ÃÀ®Ã¾°Ã¿¬Ã¾´Æ¾°ÁÂ±Â¾°Ã¾­Â¾¬Ä»¬Á»°ÃÁ®Â¾²Æ»¯Ã»®Á»©Âº¬Áº¬Á½¨¾¹¯Á½¬Ã»­Á½¬Á¼¯Ã½¬Á½®¾»«Á¼¬Á»¬¿½«Â¹¬¾»«Â»©¾¼­¿¼¬¾¹«¾¹¨Àº«À¸¬À»«Áº¬À¸¬Á¹«¾»ª¾¸§½¸¬¾¸ª¼»­Á¸¨Á·ª½·¬Àºª¿»¬¿»©¾·©¾»ª¾º¨¾¸ª¾¹ª¾¸«¿¹ªÁº©¾º«½¸ª¾º©¾¹¬¾¶©½»®¾»ª¾º©¾¹¤¼¸ª¿¹¬¾¶§½µ§ºµ«¾·ª»¶©¼·ª¼¶¨¾¹¥º´ª»·ª»¸©»¸ª»·©Á³¥»»©»´«¾·©»¶¨º·©¾¶¦»µ©»¸¨¾·©·¶¥··¦¹¶¤¼´¦»³¤ºµ¥½·¥¹´¡»´§¸´¥º³¥»³¨¹³¤¹±¥·±£»µ¥»·©·³¨»³¤·³£·² »²¤·²¹²¦º²¤º³§¸µ§º¶¥·´£µ³¨º®¡¹²¥º³£·²¢¸´¥»±¡·³¥º°¤µ±£·µ¦¹³£·°¥¹°£µ´£·³¢·­¥·±¡»³¢´®¡·³£¶²£´°£·®¡¸²¢µ° µ°¡µ­¤³±³­¢³²´±¤µ® ·°¡³²¡·¬¤¬®¡³³¡¶²³°¤³¯£°²£³³³¯¤³±£³³¢²¯¢²°³²¤µ±¦²°¥±³£³°§¶°¤²±¥³¯¢´´¥³´¤´³ µ³¡´³¥¶³£¶³¤µ³©´µ£³µ¤·µ¥·²¡·³£¸°¤µ³§´²¡·´¤µ²¡´¯¢¶³¦¶¶£¶³¢¶³¡·µ¤·¶¤µ³§¶³¢µ´¡µ³¥µ¶¦¸³¥µ°¤·¶¦·µ¤¸³¤º´¥··§µµ¤·¶¥·´§¶µ§º³§¹³§¶´¥¸³¦¸·§·µ¨¹µ¥¹¶¨¼¹©¸´£·´¦ºº­·µ©¹¶¦¸¶¨¹¶§¹´©º¶¤¹¸©»·¨º·©»»ª»¸¦»¹¨º·®»·§¹µ§»º¦»¸§½¹¨··¨»¹¬¼ºª»¹©¼¹©¼¼¨½º©¿º¨¼»¨¾¹©»¹­¾·­¾¹¨¾º¬»¾ª¿ºª½¸©½»¦¼¼«½¹¬¾¹©¾¹§½¹«¾¼¬¼¼¬¼¼­¼¹¬Á»ª¾»­½»¨¾½ª¾»­Á»¯½¼¬¼»©»»ª¿º¨½»ª»»¬½½©»½¯»»®¿¼¬À»­Àº«À»ª¾»®Â¼ª¿½­¾À¬Â¾¨¾¼¬À¼¬À½¯½À«Á¼¬¾½¬Á½­Á¼¯ÃÁ¬Á½¬À¿¯¾¿¬ÁÁª¿¼«Â»ªÀ¾®Ã¾®Á¿¬ÃÁ¬À½®À¿ªÀ¿¬¿¿­ÂÁ²Á¾±Á¿®Á¿«Â½®Á½®À¾¬½¼ª¿¹¬»¶§±· ³®¨£zzzwi{]~t_wq_xu[|nSwqbzu[|zdkqlf~kt~ozdxg[t`SkYOi`Qi_Qg`Ql_KibMqdMiiKkiSldFndSndOg`Ki_Kd[KibKd]Kd`KkdMi_IkbOlbQliMk`QobOqlKqfOrnOruYtuWut[xuWtw[z_f©É¦à¥³ê®¼ò¶Ãø½ÈøÄÎÇÓ¨®ÚðÒÎúÌØøÐÓÄÙ©{çjãÔÆúÎÚúÍ×úÓØã-÷'Cò<+÷&äúÐÜà!ù?ô6"ùáúÓßúÕáúØàúÛâºàªdî\¸å©úÝåúáèúáèøãçÈç¼®î¥îêâúêïúìïúëòúëðúëðúêñúèïúìñúëñúîðúëóúîóúìôúïòúìôúïôúòõúíóúïõúîóúðòúïóúïôúïõúîòúêïúìîúëïúîïúèëúâìúâêúßëúàçúÜæúÚäúÛåúÚâúÖáºß¥dîX¸Þ¡úÕÙúÕÚúÒØúÍÖîÓÉªßÙÔ½úÌÖúÌØúÐÕúÍÓÖÓ·QñE¼Ü¢ðÐÍ¥Ý*ö$»Û¢0õ)PîDänËØ­öÎÑúËÒúÌÓúÈÐúÉÐúÁÊö½Êö¾Æî´Àìµ¿ë³¿ç¯·ã°¹ÝªºÛ©³Õ¥³Ö¤²Î ¬Î¬Ó¤©Ì¦Ç ¤È¦Â¢µ¦xnlx_zo[wo]zlUqlSniWqdQodQnfQokSldWnbOi_MfWFf_Oi`YfgMifUi]Kl_Kd_Md_OgbOkbIk`OigSkfSkkQnfQkbOklWnd]twdu||wztoqodo]xn_{q]w|`wk[{n_{z_{zb{{g{zg|~b|uk{i{|q­¥¬À¯¼Ã·ÁÄµÃÈµÆÆµÇÃ¶ÆÆ·ÅÆµÈÆ´ÇÆ´ÅÅ´ÅÈ³ÇÅ·ÈÆ¶ÂÅ·ÅÆ·ÇÆ·ÆÄ¶ÅÆ´ÆÃ³ÅÆ³ÆÆ¶ÇÆ·ÈÊµÅÅ´ÆÆ³ÃÆµÈÈ·ÆÅ·ÃÈ³ÈÆ¸ÅÃ·ÈÆµÈÅ·ÆÅ´ÄÇ·ÄÃ³ÆÆ³ÈÃ²ÄÁ¶ÂÅ³ÆÂ³ÃÃ´ÃÃ´ÆÁµÄÈ·ÃÆ·ÇÃ¶ÆÃ³ÅÁµÅÁ³ÆÇ³ÃÂ´ÄÃ³ÅÂ±ÃÃ´ÄÁ´ÂÆ³ÃÃ¶ÃÂ³ÃÂ¶Ä¾°ÀÁ°ÃÀ±ÆÀ±ÀÁ®Á¿¶ÁÀ®Á¾³Â¾±ÂÃ°ÀÁ¯ÁÁ²ÃÁ±¾½¯¿Á²ÂÁ²¿À²Â¾°Á¿±ÁÂ¯¿»¬ÁÀ±ÀÀ²À¿®ÁÁ«¿¾²¿¾±Á¾´ÁÀ®¾¼°Á¾¯¿À±Ã¼±½¾¯Â¼¯¾À°¾¾­Â½³Á¿±ÂÁ³Á¼¬¾¾®¾Á´¿»¬¾½®Á¾®¿½®À¼¯Á¿¯¿¾°¿»¯À¾°Á¾®¾¼¬Á¾±À¿®¿º¯¾½°Á¿¯Á¿­¿º®À¿­¾½¬¿»¬¾¼¬½»®¾¼¬½¼®»½­»»¯¾¼¯¼¼­À»¬¿¸¬½¾¬»º¬¾¹¬½»«¼¼±»»¯»½¬¼»¬¼º¯¼¹¬¼¼¬»¶«»¸©»º«º¶©¹¹©»»«¹¸©½º¬»º¬»º«º¸¬»·§»»«¹·ª¼·¦¹µª¹¹©º¸¬»·©»¹¬¹¹¬º»ª»¸¦¹º§·µ¬¶·«·µª»»§·¶©´¶¬ºº¬¸¶©·´¦·¶¬»¶©·µ¨»¶§¶¶©¹¶¥¹·§º¶¨¶¶¨¹³¨º´¦µ³«¶·¨º¶¨·µ¥³³ª¸¶§¶³§¶±¥º³¨·µª¶µ¨··§¶³ª··©¸³©·´¨´¤ª§²¨³­°¨µ«°ª³­±©±ª°­±­²¬³­±«³¬°®¶©±® ³­²©²­²©³­·°²«³­³¬²®³¯°¬±«´³³­·«²«·¯³² ·¬²­´¬³³·®²¬ ¶¯²±¶¬¶¯·¬³® µ°µ«·³²®·®³³·¬³¯µ±¹°·¯·°µ±·±¸°³¯·² ·³¢·±´°¸¯¡·²¡º±£¸³¡¹²¡¹²¡¹³¸°¡»°¡¸°¡¸´£¸®¶²£¹´£·³£º²£·´ ¹²¢¼²¤¹µ¡»²¢»³¥··¤º¶¡º²¢»µ£¸³¤½³¥º³¥¾µ¦º³¤¹·£»´¡·´§¾·£ºµ¦»µ¤¼´£¼·¥»´§º³¢»·¥ºµ§¼·¢»µ£ºµ¡¾µ¡½²¥¸³¤½¸§½·©¾¶¤º¶¡ºµ£»·¦¾·§»¹¥½·£»µ¨»¶¦·³§»¶§»·¦¾¶©»·£»·¦»·¥½¶¡½¶¤»¶§¼·§À¸¨¾¸¥½·¥½·«À·¦½·¦»¸§¼·¨¾¶¬¾¹§¾·§¾º©»º¤¿º©¿»§¾»ª¾¸¥¾µ§¼º¤Á¸¦¾»¦¼·¤½·©Á¹«¾¸¨¾·©Á·«»·§½¸£¾»¤»¼¦¿¹ª¾·£¸²¡º±µ²¯zkouo{bnUzfQxnUxnSugMwqU|nQxt]zb|bzYzbwbruxigYzYKkYDkQ=kY?iUDiYBf]FfSDkYDgYKgUDkYFl`Dn]DgS=gQDfS?dUBdU?fU=gS?iYBg]Di[IkWDg]DgYIi]Dl_BogFtiMunKqgOqqOxtUu|Ygµ Ê¬â¦·é¬¾ò·ÆúºÌ­ÖúÝzúÆÒøÈÑàv%÷ 5ó-)õ#ÌÑ®úÊÕÖÐ¶QïC¼×¢ðÌÎ¥Ü*õ%«Ù%÷!à}îÈÌß}&÷!ÚÕ¼úËÚúÐÙã-÷'Cò<+÷(çú×ãúØâ±å¡üëúàèúãêúäêúéíúâêúäîúäèúâìúäíúäïúåïúçîúçòúçïúæïúæïúçñúéòúèðúæðúäìúåïúéñúèïúåìúçìúäêúäìúæéúâìúâçúßèúÜèúÙäúÙäúÕßúÓßúÕÝúÐÛã-ö'Cð<+ö%à|úÊÔúÉÓúÇÔrçbùØÎ¶úÈÔúÊÐúÊÕúÈÔøÌÐÚÎ·îÍÊúÊÓgêW?ð8áÎ¿.ô&'ö!7ó/%ö£ÚúÇÑúÅÐúÂÌø¾Îø½Ìõ»Å³Ê^àM­Äã¯¾à¨ºß¨·Â¬£jÑW¼tÈ ªÐ¬Í¬È¦Ç©Á¥À¢»¯ªzwg`|qYznMwgMqdMt_Kn]Ik`DiYKl`Ii_Ff]Dg[KbW?bQBgS?f_Fg_IgYDiWDfSBdQ?fUFdWFkUDfUBgQBkbIgbIkYIl[DkYIgWKnkUxtn~toqd{ikd{`kYwfQwkWtnYukOuiMxnYxuS{nY~oYwr]|rY{oWzu`n~¡¥·©¶¾°¾Â¯ÁÃ±ÃÁ°ÆÀ²ÂÁ®ÅÁ²Æ¿±ÄÁ²ÈÀ¯ÈÁ®ÆÀ°ÄÀ°ÆÁ°ÇÁ²Å¾³ÄÃ³Ç¿®ÃÂ°Æ¿®ÃÃ²ÇÀ²ÆÂ°ÃÃ°ÆÃ²ÆÁ²Ä¿²ÆÀ³ÁÃ°ÂÁ®Ä½¬Ä½²Ã¾²Å¾­Å¿­ÃÁ²ÃÀ®Æ¾®Ã¾­Ã¿¬ÅÀ­ÃÀ®Ã»®Â¿±Æ¾²Ä¿¯Ä½°Â¾°ÂÂ±Á½¯À»®Ã¾¬Â¾¬Ä¾°Â¾¯Â¾¬À»®Ã¿¬Â¾±ÂÀ®Â¾¬Àº­Ã»«Àº¬À¼«Á»¬Á»«Áº¬À»«Á¼¨À½¬Á¹¬Á½©Á»­¿º¬¿»¬À¼¬¿»¬Á»ª½»©¾¼«»ºª¾ºª»¾«¿º©À·¬¾¸«¾¹®¾¸¬¿ºªÀº®½¸¨½»«¾»©Àº¨»·ª½¸«Áµ§½º¬½»©¾»¬»·ª¾º©»º¬¾»¬¾¸ª¾ºª¾·ª¾»©¾·©¼·ª»·¨½»ª»¸¬¼¸ªÀ¸¦¼¸¯Á·©¾º¨¼·¨¾º§»º«¿·«º¶§¾·§¾¹©½¹©»µ¦½·©¾»©»µ«»µ¦»¹¦½¸¥»¶¦»³§»¸¤»µ§½³§»¶£¼²©¼·¥¸³¦º³¥¹·¤»³¢·´§º²¥»³¥º²©¸²¡¹³§º·¢»³£º³¢¸´¨»³¦¸³§¹±¢¹°¤·°¼³§·±¦·²¢·²¤´³¢»´£·³¦·®¨·²§¹¶¤µ²£¸°¥¶¯£·µ£¶±¡º´£µ°¢·°£·®£³°£·±£·±¡³°£¶°£º²£µ°¦µ±¡¶­µ²¶°¤·°£µ³£·²¥µ²¡´²¡´±£¸³ ¶®¡¸¬¢´²¢³°¸°¢´±¢·±¡¶§­± ³°´¯ ´°¢´±£±±¥³±£¶°¢°¯ ´´²± ±®¢¶±£±²¥´³ ³²¥¶µ¡¶³£³¯¡±¯´² ³¯¢·±¤µ´¶´§¶³¡³®¢¶³£´³ ´³¤³³£¶±¦·³¢¹´§³³ ·µ¤µµ£¶³£µ³¤¶µ¡¹¶£³²£µ´¢·²¡·µ§»µ£¶³¢·¯¡´³ µ³¥µ±¡·µ¤¹³¨·´¤··¡µ±¤µ´¤¸³¤·´¥´µ§¶¶¦·²§¸¹©»·¦¸¶¥¸·£¹³¤¹·¥º·¦¹³¢º´¤··¤»º¬»»¥»µª»·§¶¶¥»º¨»µ¨»·ª»·¨·»©»¶©º¸¦¹¹«»¹«»º§¾·«»·¨º·ªººª»·§º¼¬¼·¦»·¦¼º«½»«¼º«»º©Áµ©»¹¨ºº¬½º¬¾¹¥»º¨½º¬Àµ¨»»©¼»ª½»©¾»¬À»¬¿»«»¼§¾·«¾¹¨»»¬¾½«¿º­¾º¬½¼ª¾º­»»¬¼¼«¾¹«¿»­¿¼©½»­¼º©Àº¬À¾²¼¸¨Àº­¼¾­À¼¬À¼­Á»¬¾½¬¿¾ª»½­¾¼¬¿¾­¿»¬½¼«¾¼­À»®Á¾¬À½¬À½®¿¾¬À½¬ÀÁ¯À¼¬À½­¿À¨¾»®Á»«¿¾­Å¼­Á»¬Á¿®À½¬Â¾«¾À¬Â»®Á¿­Ã½ªÁ¾¯¾Á¯Â¿°Â¾°¿¼¬¼¼¨»·§··¢³­¬zoxur~iq`~rWxo[{u[wt_wx`~t_xg~|dff{bkx{qnUu[OqdMl_Od_Si_OifMf`Og_QngKd_Ki_KgbQllMldQiYOiWMfdMf[Fk`Mk]Fl`OibOifMl_SgfModQnbOigMklStnSuzUurSuq]qt[z[|i¡wÁ£×²ê®½ô·ÃúÀÈÄÐGï; øækúËÔ¨Þ(ö!¸ÚìÎÆkê\,ø$ÛÕ½øÌÕÚÖ»îÑÎúÍ×gêX?ñ9µÛ(÷"ÌÖ­úÌØÌÙ°)ö#½Ú¤úÑÚÖÔ½QïF¼Ý£ðÒÓ¥à*ø&ÅÞ²ÈàµGô@ûïtúäçúäëúçëúæìúæëúãíúäìúäìúãìúéîúåïúæîúéðúìîúèíúëòúéðúëðúéñúêìúæðúêïúêðúéïúéìúäìúäíúèëúèèúäèúáéúÞåúÜæúÚÞúÙâúÖÝúÖÞúÖÛÖÖ½QðF¼Ü¢ðÌÑ¥Ú*÷$Å×¦úÇÐµ×þûÖÒµúÊÒúÍÓúÍÓúÐÒúÍÒúÊÐúÌÒÞúÌÖ«ÌÚ¯~çjÑÖ°æÕÂ§Þ%÷ ºÙúÈÐúÈÐúÇÏúÄÍÜv+ó#@í6*ò"Ñoé®¹Ëµ£!ò0ë&-ë%cÕRÑ ¯Î­ÌªÌ¨Æ¦Ä¡¾¥·´§|to{d~t_|tYulUwkSrgSlfSkfUo_QlfUg]OdfSfbOd_Mf[QkbOidQffQk_IiYOk`Fb`Oi`Sk_Mf`Mg`MiiUkiQl`UldQkdUndWno[xwu{wi~oqnl{[iY|n_tu`wnYxl[wudz`|w_|zgzf{du_ukt| ´¬´Á±½Âµ¿Ç¶ÇÈ·ÄÃ¶ÃÇ³ÇÇµÆÆ¶ÊÈ¶ÈÅ³ÈÅ³ÆÆ¸ÇÆ·ÆÆ³ÄÉµÉÈ³ÅÆµÆÆ·ÄÆ³ÉÈ¶ÃÇµÈÆ·ÊÈ¶ÆÃ¶ÇÄ¶ÆÆ·ÃÃ·ËÆ·ÆÇ¹ÇÆµÆÆ³ÆÃµÈÃ¶ÂÆ³ÆÃ³ÅÅ´ÅÆ³ÆÃ³ÄÅ¶ÆÃ³ÆÂ³ÃÅ´ÇÁ³ÆÄµÅÃ³ÃÂ³ÄÂµÁÃ³ÂÃ´ÆÃ³ÁÃ³ÈÃ³ÃÂ´ÂÃ³ÁÂ³ÁÃ³ÆÂ±ÂÄ´ÁÃ¶ÄÁ³ÃÂ³ÃÁ®ÂÁ²ÁÁ³ÃÁ²Â¾±ÃÁ®ÀÁ²ÃÀ³Ã¿³ÂÃ²ÂÁ³ÃÂ±Á¾²ÁÁ±ÂÁ³¿Ã²Á¿¯¿½±Á¾­½À°Â½°¾¿°Á¾­ÁÁ¬À½²Á¼®ÁÁ°Á¼®¾½¬¿¼²Á¼­¾¼°À½²½¾¬¾½±¼¾®À¿«Á»®¾¾±¿¾®À¾®½Á¬ÀÀ¯¿Á®¾¾°¿¿¯¾¼°Â¼¯¾º¯ÁÀ­¾½¯¿¾®¿½°¼»¬¾»°À¼¬À»ª¿¼¬¿¾­¾»¯¼¼°½¾°¼¼¬ºº¯¾¼¬»¾®¿¾¬½·¬¿¼¬½»°¼¾¬»»®¼»¬»»¬¿¹¬½¼ª½»¬¾º­½»°À·¬·¹¬»¼¬»¸¨½»ª¼·§¸º«»¸©»º¨¼º­¹¹¬¿»©»¶¨¼¶«¹º¬¹¸©¹¸«¹¶¥º·¬¼·©»·§¹·¬¹·¬»¹¨¼º¨»¶¦º¹©»½®¹µ§º³¨»·¨»¸¬¸·¨º·¨¹·¨¸¹§»³¬»¶©µº¨·¸«ºµ¥·¶©¸·§¹·¦¶³©ºµ§³µ§º¶«·¶§¶´¥µ³©µµ¦¶µª¸¶§¸µ¨¶µ§·¶¦¸·£·´§¶³©·³¥¶³§µ·©·³©·²¦µ£®ª®ª²ª³©²«´¬°§²« ³©¯¬³¬²®°«³¬³®³«³®±¬²­³«²®±ª³¬³¬²­³­°­²®²¬³­µ® ·­²®³°¡µ±¶«²­³®´­µ®´®²®µ­²® ³®³±µ²¡´°·®³¬ ³­³­µ­¡¸­µ°¡·®¶­µ­¶³¡µ¯ ¸°·® ¶¯¸² ·±£·¯ µ²·² ·¯£¸²·°·¯£·²¡¹±·³¡¸³¤»³¡¶³£·³¡¸² ¶²¡¸¯£¸³£¸´¢º®¡¹²£»±¥º¯¢¹µ ºµ§·²£¸´£·´¸²¢¹²¦»¶£»³¢·³¡»µ¦¸¶ »¶¡ºµ¦º·¤»µ§»² ¹·£¹´§¼µ£¹²£º²£¸¶¤¶µ¤»³£½´¥º´¢¼³¡»µ£»·¤»µ£¿·¥»º¦¹´¥»´¥»³¥¾¶¢»µ¦½¶§»·§»¸§¼·¦º·¢¼¹§ºµ¥¾·§½·¦À·¥¾´§½·¥¼·¤¼¹ª½·¦¾µ¤¿»¥¾µ¨¿´¤¼¸¦¼¶©¾¸§¾¸¡½·§½¹§½¸¨»·¦¾º§¼º£½¹ª»¹£¾·¥¾·¦»»§½»£¾¹¦¾º©À·¨¾»©¾·¤¿¸¦Àº¬Á»¨¾·¨½»©½¹§ºµ¡ºµ¡·±±¡§uonkidrY|nQzlOzgKziOrkUxnS{oQzuY|qY|{Y|[t]udqtub]QqYIg`FlMIfYDfQBiYKgWDgYIdSBg[DfYFkUDfYFi]DfQBgS=gS8]Q?fQ?fO?dS?l`BgY?fUIfUDiY?l`DnYDlfIngKrqOtgItnMqnMz~U_¤zÈ§Ö¦³ê³¾ñ·ÆúÀËêÅ¾ãÊ»(ö!äjúÇÍÜ~1ô)ÔÎµúÄÌsä_ûÃÒ¤úÉÒúÇÓúÈÐÜùÌÓ«§Ú4ó+ÞÍ»úÁÎÝÉ¼3ò,¦ÙúÈÓøÆÑÚÌ¸îÉËúÇÕgèY?ñ9îÎÍêÐËãÕÈ(ø#ërú×àúÜåúÚçúÛåúÝéúÛäúÝæúÝçúÜæúÛêúÝêúßæúßéúßèúáëúâëúâîúãêúáëúâêúàëúÝêúáéúáêúàéúÜæúßæúÝåúÝãúÜäúÚáúØàúÕßúÐÛúÏÙúÐÛúÌØúÌØøÈÔÚÒ¸îÈËúÅÐgæW?ï6îÃÃãÉºû
Oí@ùÖË®úÂÍúÅÎúÅËúÈÎúÅÍúÆÍÞwÿÈÓ£úÈÎãÍ»áÏºúÉÑúÈÎÞÎ¸5ô+¡ÜúÆÑúÃÌøÁÊÓÈ«Pé@³Ëâµ¹Ì&ñ±¿Bå6Cá9¨¸²­pÊ]¾¡Ê©Æ§Ä§Ã£Ã¤¾¢µ²¥|tf[qSzlQqdMqgMtdIg]InYBkYFgYI`UFdWDgUD_Q?fSFdYB`UFg]?iYIdQ=fQ?`OFfSDbUBfYBiYDkYDg_Ik]BgWFl[KgYDibQwqdz|zidzddf|lz[|kQwkSwlUqgOq`QrgUwrWulUwqUut`xr[|t`|z[|gn¨¦¾¯»Ã¬¾À²ÁÂ°ÃÂ­ÇÁ²ÃÀ¯ÆÁ±ÃÃ®ÄÃ®ÅÃ°ÇÁ²ÆÁ±ÃÂ³ÄÃ²ÃÁ±ÇÁ³ÇÁ±ÃÁ¯ÃÀ°ÃÀ¯Ã¾±Å¾®ÂÁ®Á½¯ÆÀ²Ä¾¯Ã¿®ÃÁ®ÄÁ®ÄÃ®Ä¾°ÃÀ®ÁÃ­Ä¾°Á¿²ÄÂ°Å¾¬Ä¾­ÃÁ®Ã½®Ã½®Ã¾¬Ä¾¬À½­ÂÁ®Ã¾­ÁÀ®ÃÁ¬Á¾¯À¾®ÁÁ¯Ã½¬Ã¾­Ä¾­ÁÁ®ÃÀ­Ã¾­À¾­Â¾¬Á½«½¾¬¾¾¬Á½®Â¾«Á»­À¼­Á½ª¾»¬À¾«Á»©Á»¬¾»¬À½¬¿»¬À¹®Á½«Á»¬»º©¿º©À¸«¾º«¾¸­¾·¨¾½ª¾¹«Àº§¾º©¾»¬½¸¨¾¹©½·«½»¨¾¸¦½·­¾»¨¾·¬¾º¨¾¶ª»¹©¾¸«¾¹¨¿¹ª¾º©¾»ª»¹«½·¬½¸ª¼·ª¾¸¨»º«»·ª¾·ª½»©»»ª¾·«¼»©»º¨¼µ©¼¹¥½·©¼¶©½µ¨¾µ§»¸§»·¨¾·¨»¶§»¹¥»µ©»»¤¸´©½·©»º¦º·©¹¶¤»µ¢½¶©¸µ§»µ§»¶¨¸¶¨¼´¦»·¥º¶§¸·¥º´¥º´¥·³§»µ¤¹·§»² ¹µ¥¸³§¹²¨º²¦¸µ¥¼³¤¼´¦´¯¢»³¤¸²¥·µ¢¸´£¹´¤·³£º³¢µ·¤¸³§»¯¦»±¢·²¤·³¤¹² ·±£·±¤·´¤·³£·´¢´¯¦·²¥¸±·²¤·²£³³£¸°£³® ·¯£µ±¶°¡µ±£´°£µ±¢·®µ°·¬´¯¦¶¯£¸®±²µ°£µ® µ±¦·­¢²®¡¸¨¬±¤²±¡³°³¯¡´³ ³°¤³®µ°³°¡¶³¦´°³²¤°¯ ³­¤·³°³¡´³ µ²£³°³²¦´³£³²¨µ³¦µ³¦·´¡³° ·±¥´´£³±¥´³¡·³¢¶²¦³´§·³¤·³¦·°¡²³¡´¶¤´³¤µ´ ¶¯¤¹²¡·±¤µ´¦µµ¦µ³¡¶µ¥µ²·³¢··©·¶¤¶³¤³³¤¶³£º·¢¶µ£·´¦µ·¤µ³¦¶¶¥·´¤³¶§¹µ¦º·¥¸¸¤º·¦¹µ¢¸º¬¸·©¹·§¸¶¨·¸§¸º¬¹·§¸³¥º´©·º¤·¶©¸·¨¹¶©¸·ªº¸©¸º¨»º©º¶§¹·¥º¸¨¸¹©º·«¹¸«»·ª··¨»·¨½³¬ººª»º¬¾·¨¼»ªº»©»»«À»­º¼«¾·¨»º©º¹ª»»§¾»¨¿·¦¹º©¿µ¨»º«ºº«¾¸¬¼»«»¹«¾¸©½¼§¾¼­»½¯¾¼§½¼¬¾½¬½¹¨¼º¬¿»©Á»¬À»®¾»¬¼¾¬¿¹¦¹¼¬¿»©½¾¬Â»«¾¹¬¾½¬¿»¬À»«¾»©¼»©¾»¬¿¼®¿»ª»º°Á¼«À½­Àº«½»«¾½«½·¬À¾©¿ÁªÀ»­¾¾¯Á¾¬À¿­¿Á¬¿¿«¿¾«¾¼¬Â¾ª¿¾­À½¬¾»®ÁÁ«¾¾¬¿¾¬¿»­¿¾¬¿Á¯¿À¬¾¾°¾·¨·½¨µ°®©¦~wuuniw`~zb{t_wrYzrYww]zzbx{`||_~{dd|g{d{ixzkfUt`UidUl]Kf_Kf]KibQlbMf`Qi]Ok`MibFk_MffMibMi]Md]Dg_Kd`If[Of`If_OlfKibMi`OgbOkdOk`UoiOqoStrUtrUqqStuUoz[~dr·¢Ò¬ã®»ð»Áú¿ÇúÅÊúÆÌêÌ¾(ö!ãiúÉÍôÌÆWëI=ñ1rä_øøàË·úÈÌúÊÎáxÿÈÖ£úÉÍ¼Õ&÷ÅÏ úÆÍÄÓ¤&÷¼ÔúÉÑúÅÓúÅÐúÅÑÜúÌÖ¯úÎØúÌØêÓÌ(÷#êoú×àúÛáúÚäúÝàúÛçúÛåúÜäúàæúàäúàçúÞëúäèúãêúáêúãëúáêúäìúæëúäìúäëúäêúåëúÞëúâçúßäúàåúÝäúÜãúÝáúÛâúÙÞúØÞúÕàúÌÚúÐÚúÌØúÍÒúÎÖúÍÔúÈÐúÊÎÛùÌË¦øÆÊ9ñ. øtä_û
¥×çÆ»öÃÈùÅÆøÄÈÿâgÿÚÆÐÛÉ°ÉÏ¤RìA°ÖÒÎ­ãi+ö$ÕÕ±úÈÒúÆÌúÅÊöÃÆ×È«çÁ»ó¹ÅaßN=ë1É¹£/î'1ê(ö.ê'¼­Í ¨ÌªÈ§Æ¨È§Å¥Â¢¿·°¨{ql~]r]ogYolYqkSndQn]OgbMgbSf`Ol_Kg_Mb]Of]MidQfbSkdKf`Od[Ig]If[Q`_Ki]Qb]Kg]MgbQdgUibQnfOl`QodUqn[xxk{trorrtlz_q`xt]wnWurYwnWwq]or_xx]{{dzud|{g~~iqq¬«»­µÂ°½ÃµÃÈ·ÆÈµÅÅ³ÇÆµÅÇ´ÅÆ¸ÇÆµÈÅ´ÈÅ¶ÆÅ¶ÈÃ³ÆÆ¶ÂÆ³ÄÅ¶ÆÇ·ÁÄ³ÉÆ·ÄÆµÅÄ´ÄÇµÈÆµÄÄ·ÄÆ·ÇÇ³ÃÃ¶ÃÈ³ÆÆ³ÃÄ´ÆÆ¶ÆÃ´ÆÆ³ÄÄ³ÁÃ´ÅÅµÆÁ´ÅÃ³ÅÇ³ÆÃ³ÂÂ³ÄÆ±ÅÁ³ÂÃµÃÅ´ÆÃ¶ÄÃ±ÃÆ³ÄÁ´ÃÆ´ÄÃ³ÄÂ³ÅÁ³ÅÂ³ÃÄ¶ÃÅ³ÄÁ´ÄÆ¶ÆÀ±ÃÁ°ÁÁ°Á¿±ÁÁ²ÃÃ±ÀÁ¯À¾²Ã¿­Ã¾³¿Á°Ã¿¯Á¾±¿À®¿¿®ÀÃ³ÀÀ³¾¿®ÁÀ®¿¿¯Á¾±ÀÀ³¿¾­¿¾°ÂÀ°Á½®Á½®Á¼°¾½°¼¼°¿¾¬¼À°¿¼®¾½­Á¼¯¾½±½À®¿»­Á¼­½¾±¿¿­À¾®¾¾­À¾¯¾¼®¾º¯¿¿®¿¾¯¿»­½¿®¾»¬¾½®Á¾¯½¾¬¾½®¼À¬»¼¯¼¼¯½½¬½»¯¿½¬¾¼¯¼¾¯¿¼­¼½¬Á¾®¼º­¾½®¾»®ºº¬¼·°¼¾­¹»«¾»­¾»¬¾»¯¾¼¬½»«¹¸­»¹©»¼®½»¬½¾¬»·ª¾»­¹ºªº¹ª»¹©¾¼­»º«½·¬·¹©»¹«¸¶®½¹¬»¸«ºº¬¼·¦·¶¬¼¶­¸·¯¼º¨»´¦º»ª¹·¨º¸«¹·¬¹·¬º·¨·¶¬µ¸¬··§·º¬¹³¬·¶¨¸·«¸µ«¹¶©··§¶¶¨·µ¨º¶ª¹´¨º¶¬¶·¨·³ª»´ª¹·§º´¨·´¢µ´¨¶³¨ºµ¬·µ§µ³©·µª·³«·¶¨·²§·³§´µ¦·¶©·´§·´§µ³ª¶·¦·¤¬©­¨®­®®³¬²«£²®³ª²¬³¬°ª³®³¬³ª±®±®³©´­°®²¬ ³¬µ¬³­·¬¡²­³®³°´¬±¬³®µ®³¯¢²¬²­µ®³®³¬µ¯³¯·­±«³¬´­³¬³®µ®µ¬·«µ¬´¬³³³¯³°¶²·®·¯³¬·¬·°´²¡µ¯¡µ­µ°¢ºµ ·²¸²´²¡·±¢·³ ¸®¡¹²£º± ¸³¢»³¡·²¢·²¤µ²¢º²£¶²£¸²£·³ ·¯¡·²£¹³¡¹²£¸³ ·³ ¹³£»±¸°£º±¡¸³¹³¢¸³¢¸µ¡¸´¢½²¥»²¢º´¡»²§»¸¥»´¡¼µ¡º´¡¸µ¤»±¤¹µ¡¹³¸´¡»µ£¹µ£¼²£º² º·£½µ©¹³§»·£¸³£º·£»²£»µ¥ºµ ¾·¦»·¤¼·§½¸¥½¶¥½µ¨»µ£»µ¢¾¸¢¹·§»µ£½µ§º·¦¾µ§½´¡¼´½¶£¼´¢¾·¥º¸¦½·¡½¹¤¿·§¾µ§¿¸¥À·ª¿»£¾µ¢»·¨À·¨¼·¥¾·§¾»¨½¹§¾º¦»¹§Áº¦¿·ª¾»¥½¹¥¾¸§¾¸¨¿¸¥»¸¥½¸£¾¸¨À¼©¾¸§Á¸¨½·¥»³¡·²³©§~rqwn~du]|qWnUwnSziMzgYxoQwoWxtQwrY~oW{q]tU~tYw]nxnt_|[KoYKlUBgQFnS?dQD_YDgY:dYFdQ?dW?gW=fYDg_DnY=dS?gMBfMD`QDdU:dSDgUBdYDlUFfYDf[Dg]Dl[DldIniFrlOqkIqdMrkQwzS~`¤x¿¢Ú£¯å®¸î´½ó»Ä÷ÁÈöÁÃçÂº&ôzÞdïÀÆö»Äë½ÁvÞb+ò#WæG3ð)ÚÁ³ÿ{ÝdÿÖ}ÀÎÙÅ­ãÂ¸7ð,gãSÏÇ¥fäS7ð,éÄ½÷»Êú»Êù½ÊÙvÿÈÎ¥úÄÏúÆÑúÇÒêÇÆ(÷"æmúÌÛúÏÜúÒÜúÓàöÐÛúÔÞúÓâúÕæúÖáúÙåöØàúÖäúÕäúÙæúÙæúÝéúØæúÝëúÛæúÛåúÞåúÜäúÜãúÛåúÖàúÕßúÖÜúÔÛúÔÙúÏ×úÏØúÎÖúÊÔúÊÔúÈÑúÄÐúÆÎúÃÎúÆÎú¾Ê×uÿÅÉôºÇ´Ì&ôùú
þ7í,±Éè²¾ä²¾ÿªÌÿùùùZâKÝ¸¸Öo(ó (õ*ó"ÏË¥õÃÈöÂÉøÃÈöÁÇõ»Çò·Ãì¹ÁÐy÷¸¹Ã¯ ø"ð¶ZÔK)ê#´Ç¨Á¥Ä¤Æ¦À »»²¯©ztbwY{lStfQk_It`Fl_IiWFiYBfU?gQBfO?`QFdW?bWDgYBdWFgYFiSDfU?dSDdO:fUD`QDdW?gQBfYFl_:f[Di]In_In[FkfQttg~zorrqnlq~]iUzo]~gU~iQtdQqgQwoUxgUzuYzrUwo_xr]~t`|kx£³¨°»¬»Ã¬ÀÃ³ÄÁ¯ÅÃ°ÄÁ²ÄÁ®ÇÁ³ÅÁ°ÄÂ²ÆÃ²ÄÁ°ÄÀ²ÅÁ²Ä¿²ÅÃ°ÆÁ¬ÄÀ°ÄÂ¯ÄÀ°ÆÂ°ÂÁ²ÃÃ²ÄÃ°ÃÀ±Å¾®ÇÀ¯ÂÂ²ÇÀ±ÃÂ¬Ã¿¬Ã¼¯ÆÁ¬Ã¾¬Å¾±ÃÁ­Â¾¯Æ¾®Ä¿¬ÃÀ±ÄÀ°ÄÀ°¾¾±ÁÁ±Ã¾®À¾®Ã¾¬Â¾³Ä½®Ä¾¬Á¼«Ä¾®Á¾¬À»°À½¯¿¿­Á½®Á»ªÀ¾¬ÀÁ­Â»¬À¾®Á¾®Á»¬Á½¬Á¸²Â¼¬¾¾°Ã»¬¾º¬¾»«¾¼«¾¼§À»­Áº«Áº«À½«¾¸¬À»¬Á½ª½»ª¾»ª¿»©À¹©Á·¬¾¸«½·§¼¸©À¸§¾¸©¾¹©¿º¨½·§½·«¾¸§¾º©½¹ª¼¸ªÁ·¨¾¸¬½º§¾¶¨¾º©¿º«¾»©¿¸ª½·§¾»¬»¹«¾ºª»º¤»¸©»¶¬¾·¦¼¸¨º»©»·¨¿·¦½º¨»·§½·§º´ª»¸ª¼·§»¸§½¸©»µ§½·«½·¨½·¦ºµ§ºº«ºµª¾µ§»³¨¹¶¥¼µª»²¥¹·§¹´§½³«»¶©··¢»·§»±£º²¥»´¤¹·¤»·§¸²¢¸²¥º³¤·¶¥¹²¤¸³§º´¤»³¤¹²§·³£¸³¦¸²¢·³¨»³¥·µ¦»³¥·¯£·²¥º±£µ®£·²¥¸µ ¹°£·²¡¸°¢·±¤·²¦¹³¡¶°£µ°¢¶®¥´²¥·®£¹±£·±£·¯¥·° µ±¶°¢´°£´± µ¬£¶°£´­¢µ± ·®¢³¯¢·¬¡³«¢·±¤³¯£µ¯³³ µ¬·¯¡µ§ «¬¤³° ±± µ°£²¯ ±±¢³±¤µ®¡µ³³®¢²¯ ³³¡²²¤¶°¢µ´²±£°±¢´µ¤³¯ ³° ²±¢³´³²£¶µ§µ³£¶³¡¶³ µ°¤³°¦¶³¦µ³¢µ³¢µ³¤³±¢¶³¨µ·¥¸´¦µ´§¶µ¦¶²£¶³¤¶²¤¹³¢³³£³±¡º³£µ±¢¶°¥¹³¡··¢´³¤´´¢¶³¦·³¦¸³¦·´£¶´¥¹µ¥·¶£·´¦¹¶§¹µ¦·±¤¸²¤·µ¥·µ§·´§·³§¸µ¨º·«¹¸¥¼·¥µ·¤º¹§·µ§·¸¨¸¶¦¹¶¨»´©º·¥·¹©¹¸¤¹·«»·¥ºº¨»·¨··¦¹´§»·§º¸¨¸¹§¹¸¤»»¨»·¨¼·¬º¹¨¼¶ª»º©¿¹¤»¹¬½»©¾¸©¾¹¥º·¦¼¸¬»ºªºµ¥¾º§¹·¨¹·ª»º¦»·¥¼·§½»¬¿·«¿¸¨»¹¬»¹©¾º¨¾»¬¾»¨¾º¬¾¼ª¼º¬¾»­¿¼­¼»«¾»«½»¬»¹«¾¾¨¾»­¼»ªÀº©¿¼¬À¹¬¾½ª¾¹«¾¹§¼º¨¾¹ªÀ¼©¼¹¬¾»«¾»®¾¼¦¾¼©¿»­¿¾¬Â»­¾¼¬¾»¥¾¾ª¿¼«¾¿®À½°¿½¬À¾¬¾»¨Á¾­¿¾¯À¾±Ã¼¬Á½¬¾»®»¾­Á¾¬¿¾¬À½­¾¹®ÃÀª»¾¬¼·§¶²°­¥wwwitg|f{~_|zb{t]|r_ux[zwb{~[{u[~u`{z`d|z`iw|qx_xdUogWi`Kn_Sl`Kf_KdfOg`Oi`Og]Mi]Mg`KibOkiSibFbYKb[Kl]Kg]Of[Ig]FffOg_Qi`Ig`MidMldMngMnnQrqUrtQnqOqoUw{buiw·Ñ¬á¯²é·»ð»»ð»Âÿì¼½Ó»µ%óuÚ_í·¾ß¾·nÞYÎ~¯Ç2ð)hÞTÿ¨ÉÿúøùXãHÝ»°ÇÅ +ñ#&ô-ò#ËÆ¡ó½Àö»Ãÿ~Üdÿ×ÇÏ¡ÝÊ±øÄÊúÇÓêÌÅ(÷"çmúÐÙúÓÛúÒÚºà£dìX¸ß£úÕÝúÔßúÕáºâªdîZ¸â§úÚçúÝèúáåúÛãúßäúßçúßäúÚäúáæúÝçúÛåúÛßúÛßú×ÝöÖ×úÒØúÐÖúÏÕúÌÒúËÒúÆÐúÈÏúÃÎúÆÊúÃÊúÃÇÿ~ÞdÿÓ|¿ÉÓ¿©êº¼Ùº«É¿Òmø³Åá²²à¯¹Ø¨¶Ö¦³ÿ¾½ ¯Ä­ÃªÀ¾¶¤Ø¬¶Ü­¾À»¤¢ÉÜ¿³ð»¿ì»ÁðºÁð¿Àò¾Áò½Äñ»¿×nÿ»Ãç¯º¿º ÷lÑXØ¦¯¹®(ì!¾pÆ¥Æ¤Ç¨Æ¢Á¡Á¾¡¸³®¤~nd|qdroYwdQnfUlkSifMgbIg]SgYKfYIb[Og[Od_MibK`_Qd`QfbKg`Md_Qg_Ki[MbUMd`I`_Mf[OkgOi_MkbSibSnbQlo]wul|©{|{ux{r{i|{bu]zt]un[ro_x{[zr`w{]|ub{wfzz`{i~uz¸­´¿¯¾Â±ÁÃ´ÃÇ¶ÆÆ´ÄÆ¶ÈÇ·ÄÆ¶ÇÆ¶ÆÇµÇÇ»ÃÆ¹ÆÃ´ÈÈ·ÅÈ²ÅÇ´ÆÆ¹ÆÅ¶ÅÆ·ÆÇµÆÆ²ÅÆ¶ÆÆ´ÆÇ³ÃÆ¶ÇÆ³ÈÆ³ÄÂ³ÆÆµÃÈµÆÆ³ÆÃ¶ÄÃ¶ÈÂµÄÁ·ÄÆ¶ÃÁ³ÅÃ´ÄÆ³ÁÃ´ÃÃ¶ÃÅ³ÂÃ´ÆÃ³ÅÃ³ÃÃ³ÂÃ³ÄÅ³ÃÅ³ÃÇ¶ÂÆ²ÆÃ´ÅÁ´ÂÃ´ÃÃ³ÆÃ³ÃÀ°ÄÁ³ÃÁ¯ÃÁ±Á¿°¿Á³ÃÁ³ÃÀµÃÁ²ÀÁ®ÂÀ¯¿¿¯¿¾²ÁÁ²ÁÃ³ÀÁ³ÃÁ°ÁÀ³ÁÁ²À½­ÁÁ°»¿±ÁÁ°ÀÂ¯Â¿¬¾Á±Â¿¯À¾³Á¾²¿¿³ÃÁ¯½¾­Á¼¯¾¼±Á½±À¾¬¾¼°¼¾¯¾¾«À½³¾¾¯Á¾¯À¿®Á¾®¼¾©¾¾±¿¾¯½»­Á»®¿½°¾¼®½¾±¾¾®À¿¯Á¾°½¾¯¿½®¾¾¬¼½®¼½®¿¹­½»°¼»¯À¼°¿¾¬¾»®¾»¬º¾²»»«½¹¬¾¿±½»­»½¬»¼ª¼¹±½»¬¹»­»¹®»¸®»»©»»«»¹ª»¼©¹¹­¼º§º»ª»»¨¾·¬¼µ¨¹º¬¹·¨ºº¥»¹§·»¬¸¸©»¸ªº¹«½¶¬¹»¬»¹ª·»¬»·ª¹»«¹µ¨º·¨¹¹¬½¶«¼µ¦¹·«¸·¨¹·¬»¸©¶·§¸¸¨¹´¨»·ª·¸ª·³ª»¹©»µ¬¸·¥··¬¶·¦³µ§³µªº¶ª¹µª¸³¨¶¶¦¸·§¹µ§·¶§·µ§µ¹§¶´§¹¶¦¶°¤··«·³§µ³©µµ¨¸¶©¶µ§¶³¨·³¨³³¨¶´§´³§¶£ª©±©®¬±«±¬¶«³°´¬²¬³®±¬²¬³«³­ ¶¬²²°©´¬³­³ª³«°¬³®·¬´­²«²­³¯³¬³­´­³±µ¯¶®³°³®µ­³­µ®¢³®´­´±·­´®µ®³­µ¯¡´¬·­·±£³¯¡³®µ¬´¯·°¶­¡µ°µ®¶°¶²¥·²µ®¶³¡·®µ°·³¡¸²£·¯¢·²£»±£·¯º²¡¹¯¢º²¡¸²·³¢·³¢·´¡¹¯¤¸³¤½¶¡·³ ¹´ »³£·²¡·±¡º³¹°¤ºµ ¸³ º³¤¸´§¹·¸²£·´ »´»³¥¹²»³£¼³£·µ¢½´£¼·¥»·£»³¡·³£¸´¡»µ¤¼¶¡¼³£»¶»³£¹µ£·³¤¼³¢¸·©½·¢½µ¾·¨¼³¤º·¤¾¸¤»µ¡½²¥¼·¦»µ¢»·¤¾µ¦½µ¢¾¶¥»µ¤¼µ§¾·§»µ¥¾µ¤¾·¥¾µ£¼·¤¾¶£½·¡½¶¥¹·¥À´©¾º§¾º¥¼¹©¾¸¦Áº¥¿¸¥Â¹£¾º¦Á·§½¹£¼¸«¾º£Á¸§À·©¿´¦½¸¨»·«Áº§½¹©Á»§¾º©¾·§Á¸©À¾©¾¹«Á»§¾»©¿º¥¾·¡¹¬³¬§¢rotqkwYwYrbx[|qUlUxoSxrSzq[~qU|oQzqYxU|uQzt`glrdnSuYMq`Fg]BiSBgU?dSDd]BgQFgS?d[DiU?dW:fYDk]IfY?kO5`ODdW?dU=fY=gUDi[DiYDg[IlY?f]BkYDn[?nkFqgFqoBofKogOuxWzgt»Î¨Ý¨²ß¬¶à¬´ÿÐ©µÿÄ§¬bÓX¾Î£´Í¢²|Æj&í"ð9â3¾ªÆ¡­ÿ¨ªµ¶²¨ª¿§È®¾«¢½È©¢Õ¦´Ùª²ÿ¦Äÿùøø^åKç¾¼ú¾ÌòÁÁxâcµ×úÄÓúÌÓà}-õ%Cï;+ö&ã~úÎÛä-÷'Cò=+÷'çúÖãúØâúÕâúÖÝúÔâúØßú×áúÖßúÕÝúÕÜúÒÜúÐÛºÛ¡dèU¸×úÅÓúÁÍ×Ç°Ô}{ÞcÙlÑ}Õ¾­é´»ÿ¦Éÿø÷÷SÜEÄ¨¥Ò£°Ì °®¬VÕHº§È©Å¨Á¨½«·¢¼§¾ªË¬Ó­Ê¬È®Ã±Ã³Ä³Æ£µÎ£¶Ù¥ºÚ¬¹Ý®¸à¯ºÿtØbÿÌv´ÂÉµ£Ó«±Dâ8=ä3¨²jËX"ìª©Ç©Ã£À¥½½¢»¶ µ²¬¡zg`qUriMtbIq_IkbIn[FdbDnS:`OBgODgMDbU:bQDgQ?gS?fQBbUFg[?d[BnQDbU=`QDiUBgU:dUFdWBkYBg[Ig[In]DnbMtg`zt|ztqqnwqbnS|oWwlMuiQwfKtq]xqY{nUzrY|nU{k[~u`~nw¯¦­¾¯¼À®Á½¯ÃÀªÂÁ²Â¾³ÃÁ®ÃÃ´ÆÁ²ÄÁ±ÅÃ°ÅÁ°ÄÂ®ÆÁ°ÇÁ°ÅÂ²Ç¿±ÃÀ®ÆÃ®ÆÂ®ÃÄ¯ÄÁ¬Á¿°ÇÃ±ÅÁ°ÅÃ³ÆÀ°ÃÁ¬ÄÀ°ÃÀ¯ÃÁ°Å¾±ÁÁ¬Å½¬ÃÁ­ÂÁ°ÄÁªÁÁ°ÄÁ°Ä»«Ã¿¯ÁÀ¬Á¿«Á¾­Ã½®Ã¾­Ã¾¬ÃÁ®Ä¾«Ãº®¿¾¬ÂÀ®ÂÁ®ÃÀ¯Ã¾¬Â¾¬Ã¿­Ã½®Â¾¬¿½¬Á½­Ã¾­Á»¬Áº­¿»ªÀ¾©Â¹¨À¼«À½¨¿½¬À½¨Á½«À»«À¾«Àº¬¿»¬¿¹«À»¬Á¼¨½»¬¾½¬Áº«½·§¾»§½¾¬¾¹§À¼¨¾¸«¿¹£¾»§¾¶«¼º©¾ºªÀ·©½»§¾º«¼¸ª¾¹ª¾»©¾·¥¿º©¼»¦»¶©¿»«¼¹¨Á¹©¾¸«¾¸«»¸ª¼¸©¾¸©¾·¥½·©¾¶©¾º©»·«À»ªÀµ©¼¶¦¼·ª¾¹ª½¸§½¹©»·«¼ºª»·§¾¶§¹¸©½¶§¼µ§»·§¹¸¦¼µ¥»¸©»´¥¹´¨¼µ¥º³¤»¶ªº·¦¹µ£··¨»µ¢¹µ§»´¦º´¢¸¶¥¹±¢»¶£½µ§¸³§·µ¥»µª¶²£»±£··¥¹³¥¸³¡¼³¤·³¤»²£·´£¹³¥·³¦»³¥¸²¡µ²¢·³£·³µ°¡¹±¸³¦º³¢µ²¡·®¢¸²£·´£·²£¸®·²¥·°¤·¯£¸´£·²¢·±¥µ±¡·°¢´²¦·°¡µ¯¡¹²¢·±¡·² µ±¡´¯£¸±£µ¯³°µ¯¡µ°¡µ®¤µ°³®¶®¦¸« ­¯¤°°¯¯£³´ ³´¦³±¥³±¢µ²¡³´³±³±¥³°·³¤¶°¦µ³£³³¡¸³¤·³¤³±±²¡³³¢³² ³µ¥¶±¤³²£¶²£·²¢´°¢´±£³°§µ³¥µ³¡°³¦´³¥¶°¥·°¦¶³¢·³¥·±¢·µ¢·´¦¶³§¸±¢³³¡´°¨´²¦·¶§µ²¤·µ£µµ¨·¶£´¶ ·µ¤µ´£·³¤¸²¡·¶¥·¶¥¹³¦¶¸¥·µ§»µ¦¶·§¹¶¤µ·¦··§·µª¶µ¥¸º¢¹¶¨¸³¨¹·¥·¹§»´©º¶§·µ¨¼µ©»·¨¹·§¾·©»´§·¹©»¶¥»·¨¹·ª¼¸¨··§·¹¦»·¦¶¸¦º·¢º¶ª»·§¼·¨¼º¨¼·¦ºº¬¼·©¾·¨»»©¹»¬¾¹©¾¹¥¹¸¬½·¨¸º©»¸¬¹¹©¿º¦ºº¨º¹¬¹¹¬½»«¼º«¿º®»»¬¾µ¬¿¹ª»¹¬»»­½º§»·«¼·ª¼¸«½¹ª»¼¬¼¹¨¾º¨½¼­½¼­À»ª¿¸ª»»¬¿¾¬¾»­½¼®¼»©¾¼«¾»ª¾¹©½¹©¼¹§¾»¬¾»«Á¼®¼¼«¾»«Áº©½½¬Á¾©¿»¬Àº­À¼¬½½­»¾¬Á»®Á¾®Á½¬À¿ªÀ»­À¾¬½À®Á¾¯À»®¿¾±Â¿¯À¾¯Á½¯¿À®¿Á¬Â¾«º¼¡¹®¢®°«uuzxo~bgwg{{b{{b~xdz|]|{_zt_{u`{x`{w`~`{~bxk~txqrbqbYolOo]Qg_Og[Qi`Ud`OibWkbMdbMg[MibMibMgnUi`Kg]MdWMi_Od]Mb`Mk`IfiSg]Ml`Kl`FifOk_QqkOnoUqrStuSonUqt]xfquµlÉ¥£Ó§«Ñª¬Áv[ÒPÿ»¦·§µ§¾¤¼¨¸¥¸¤¡°{­° ¥©¢ ¢¬ª §¬ ¬ ¬³¡º¤½¦Á¨ÿ¹·­Á°Ä³ÄÍÀ¤ï¸½÷½Å÷ÁÆøÁÆúÆÎúÇÐÖÐ´QîC¼Ô ðÐÎ¥Þ*ø%¨ßQòF¼Þ¦ð×Ø¥â*ø%Åâ±ú×äú×àúÔáúÖáú×ßúÖÜúÖàúÕÚúÒÚúÓÙâ}-ö%Cð:+õ%ÜyøÁÊµÊLè=%ó÷/î'Ð«¯Ø§³Õ¨¬ÿ²®´³¯¤¤¸ °¯ °£¥§§«¬²®¬² Ã§Ê®Ë¯É®Ç¯Ë­Æ°Æ°¾®ÆµÌ¡·ÿÁÿøøøXàGÔ±­Ñ¨®=å1õ"ï«´Ë©È¤È¢ÂÂ£Ã¿ ¾¹´®¬unwb{w_tfWq`QkbUkfUdfKl_Ii_QdYMgWK`_K`]ObYO_[OdYFd[SidQbfQi]Mb]Ki`QgYMf_M`]Md`Kk`QgdUfiWniOqiYto`uzztutr~nw`|wbzt]zl[zqUtwizd{rbzufz_|uk||f~~uw©¥¨¿³»È¶ÁÈ·ÃÆ·ÅÉ´ÆÇ¯ÅÅµÇÅ·ÃÊµÆÇ·ÇÈµÈÆ´ÆÇ¹ÆÅ¶ÈÈ·ÅÃ³ÆÅµÆÆ·ÆÄ³ÆÅ·ÇÆ³ÃÄ¶ÅÅ¶ÉÆ¶ÃÁ³ÆÆ·ÈÆ´ÃÆ³ÆÃ´ÁÃ³ÂÃ·ÄÅµÃÄ³ÇÃ¶ÃÃ¶ÅÁ´ÇÁ´ÄÅ¶ÇÂ³ÄÁ³ÅÄ´Ä¿±ÂÄ³Á¿´ÅÁ³ÁÁ²ÅÀ³¿Á´ÁÁ¯ÁÀ²ÃÁ³ÄÅ³ÁÃ³ÃÂ´ÃÁ³ÄÂ³ÀÂ´ÂÃµÁÁ³¿Á±ÂÂ²ÁÀ³Ã¿°¿¿±¿Ã²¿Á±ÂÁ³ÁÀ³ÃÁ²ÁÃ³ÃÁ³ÀÁ³Å¿¯¿Ã²ÂÀ´ÁÁ¯Ã»²¿Â¯Á¾²Á¿¯¾¾®¾¼±ÀÁ³¿¿°¿¾°¿¾¯À½®½¾¯Á»¬¿¾¯¿»²À¾°À»­¿½¯¿½®½½¬¾¼®¾¼°¿½­¼À­À½¯¿À³¾¾¯À¼°¾¾®¼½¬¿½®½»¯½»®¾¿¬ÁÀ®¿º­¼½­À¼­¿¾¯¼¾®¼½¯¾¾°¼¼®¿»«»¼­½¾®¾»±½»¬¿¾­½¿¬¾¼¯¾½¬»¼¬»¼­½½­º·®»½­º¼­»º¬»º­»»«»½ª¾»©¼»«¼¹«¹»¬»»ª»»¨¹·«»¹¬¹½¬½µ¬·¸©ºº¨»º«»·«¼¹¬¸¶¬º·¨¹¹§¹¶«ºµ¬¹º¬··§º¶¨¸¹¬¹¹¨»¶«·¶©¹´¬»¹¬·¹ª·¶¨¹·­º·«¸·®·µ¦¶¶¨¸·«»µª¶·©¹¶ª··¤¹³ª¶¶ª·¶¨º¹¨¹´ª··¨·´¦¹¶¨¸¶¨·´ª¶¶§¹³¬¸µ¨¹·¨´¸¬¹´¬¶³¨·µ¨·³¥·´¬»³¨¶´¨³¸¥¶µ¬·´¬¶¤©ª²«²®´«²ª±«³°²¬°¬²¬°°´¬³­³¬³«´°²­´­²¬±­³ª³®°¬³±³­³®²¯ ³­³¬µ¬³°¡´¯³¬¶®³±³¬µ¬µ°·¯´«·±´°³¯³¯µ°³¬¸¯¡¶°·­µ­µ¯´¬¡¶­¸°¡¸®¶® »¬µ°µ°¸­³® ³¯ ¹°¡¸±¸°·²¡¶°·±¡¸®¶±¡µ¯·°·²£¸®·³·²¡¶²¡¸³¢·³£¸° ¸°¸² ¹¶¢»²¦¸° ¸±¢¹±¡·²¡¸³¡»² ¸³¡¸³¡»± »³ ¹³¢»±¡¸²¡¹³¢º²¢º´º³¡¹³¢»³£»µ£º´¤¸°¤»´¡¼µ£º´¡»µ£¹²§¼·¨¾³¢¸µ¤»¸¥»³¤½·£º³¦½·£¼¹¥Àµ¦ºµ£¾¸©¾¶¦½¸§¼·£»¸¨¾¶ »·£»·§¿¹©¼¸¥¾µ¦½·¤¼¸¥»»¦½·¥¾¸¥¿º§»º§½·¡À¸§¾·¤Àµ¨»·¨¿·¤»µ¦¼º¦»´£Á·¦º¶¥½·¥½·¢¾µ£¾»§¾µ©¾º¨¾¹©¿º©Á·¨À¸¦À»§¿¾¦À¹©Á¶¦À¹¦¾¼©¾µ£¾¸§Áº¤¾¸¨¹³µ©®¦§|nnniw[t]zYrS{iOzwYzzU~rY~rU{t[|r[~xW~tYrY~qSu`zbntfdQrWIi]KlWIkWDg[DkUKi_FgQDkUDiWKf]?kUFgY=g_FiSDkSB`U?`U=iQ:dW?dS?g[BfYDi[Bl[?lWDg[BndIqbFqkKrlIrfIqtQx]~g]ók¼[Ã¤Å¢G×@%æ#/Þ-!æ:Ô:¥¬«¡¥ ¢{xwuroqnotowtqnqrz|¥´ À§Ê©Ð®Õ¥²Ýªµë°»î®¾óºÂöºÅù¼Èø¾ÊÚÉ±îÅÆúÆÓgêX?ò8ìÐÍÚÓ¾îÎÐúÏÛgê[?ó9îÓÏúÒÛúÐÝúÏÚúÊ×úÐÙúÌ×úÎØúÉÖúËÖÖÏ´QìB¼ÐðÃÃ¢Ó)ò!ÀÃá¬¼Ñ«®dÒUü²¢¬¢§£ª¦ ~xzrqtlllotqrtxt~ªµ§Â¬Ê®Ì±È±Ó²Ò¶Ê´È°Á¯Á­ÿª£²µ¥»¼°Ô¤®Ó¡®Î¢¬³º£Ç¤Ã¥Å¤±yMÔA«w¿·¯o^ÆPXÅKWÀKe±Yzi|_{nUxdInYFk_Il[If]IlS?gWFdQDdQ=`MB]O?dM?bU?dS?dWBfU?fQIbUFfQDg[DdQ?gSFgY?bUBi[Dg_KgbFk]In`KngWuznw|nqo~lkgo`r[lW~gQwiSwlSzi`zuW{lU{tY{xU~l[~t`||drw§³«¸Á®¿Ä¯ÁÃ²ÄÂ±ÅÅ®ÆÅ±ÃÁ¯ÇÀ±ÂÀ®Â¾¯ÆÁ®ÂÀ®ÅÂ¯Ã¿¬ÇÁ¯ÅÃ°ÈÁ°ÃÁ®ÅÂ²ÆÀ²ÇÃ¯Ã¾°ÃÁ¬Æ¿¯ÅÁ­ÆÃ®ÄÁ³ÄÃ¯Å¿¬ÃÂ¯ÃÀ°Á¾²ÅÁ¬ÆÂ°Á¿­ÃÀ­Ã¿®Ã½®ÃÁ®Ã»­ÁÁ¬Ã¼¬Â½­Ã¾®Ã¾¬ÃÀ­Á½­Ä¾­ÀÀ­À½®ÁÀ®Á¿«Ä»­Á¼¬Ã½©Á¾«¾¼¬Â»¬Á¼ªÁ»¬À½©¿º¬¿¸ªÁ¹«¾½ªÂº®½»±Á¾¯Á¾®À»ªÀ»«Á¾©À»«Á¼¬¾¸¬À¹©¾ºª¾¸ª¾¸¬¾ºªÀ¸¨¾¸«¾¸ª½¸©¼·ª¾¸«¾·©¾¹¬¾¸©¼¸§¾»«¾¹ª¿º«¾¸§¼¸«½·©½¹¦»·«¾·ª»¹«½¸©¾¸§»·ª»ºª½¶ª¾¸¦À»«»¸ª¿¸¨º¸¦¾¼¦»·¨½¶«¾·«¼¸©»µª¾¹©»·¬½·ª½¹¥½·«¼µ©¾µ¦»½§½¸©¾¶¨»¸©º¶ª»¶§¹µ©»µ§¼¶¥»µ§»¹¥»µ¦»´§¹´£º¶¤¸·¦º¸¥¹´£¹²¥º´£¸´£»³¦»´µµ§»µ¥·²¢¸´¥·²§º´ ¸±¦»¶¥·µ »µ£¸²¦»³¢»´§¸²¤·¶£¶²¦¸²£·³£¶²¡¸¯¡·´¡¸³£·²¡º²¤º³¥¹³¤·±¸´£·±£»°¥¸² ¹²£·±£·²§·´¡·°¤¶²£³³¢¸®§·° µ®¡·­£·³¥µ´¢¸²£¸²£·²¢´®¢·¯µ®¡²²¡´³£´²³±¥·«£·±¡³°£¸©¥­±¤³¬¡±±£´° ±®£µ³¤´´³¯¡´³ ²¯£³¯³±¤³¯¢¶³²®£´¯¢³³¡³´¦µ²¤³¯³°¡³³¡´° ³°¡µµ£·´§³µ¢´³¤»³¢´³¤µ³¤¶³¥´µ¦´°¤¹´¢·²£·¯¢¶³£¶²£µ¯¤¹³¦µ·¥·³¡µµ¡´´§¶³¦µ¶§¶²§·¶ µ³¤³´¢µ³¥¶´¦´²¡·³¥º¶¥´µ£¸³¥´³§¹¹¦·¶§··©»µ§·¶¨¹¶¨ºµ©·¶¤¹´¦¶¶¨··§¶³¦·¸§º·§·´©»·¥¹¶§·¶ª»µ§¹·ª»µ¬¹·¦¹µ¨··¤»³©»¸§¹º«¹·«»³£º·§º»¨º·¥¸´ª¹·§»¸©»¹¦¹·©»ºªºµ©º¹©ºº¥¼·ªº¸¬»¸¨»¹¬¹·¦º·¨¼¸§·¸¨»º§»¸¦»»§¾º©»»©»¹¬»º§»º¤¾»¨º¹¬¿¸©½º§º»¨¼º«½¾ª¾º¬¾º«¿»ª¿º¬¼º©½¼­¾½«½»«¾»«À¾®½¸¬¼¼¬¼º¬½ºªÁ¼©À¹¬¼·¨¾»®¾¾©¾»¬¼¸­½»­¿¼¬¿¼¬¾¾¬À»ªÀ»ª»»©¾½¯À¾¬½¼¬½»¬À¼¬¾ºªÁ¿¬¿½¬¾¼¬Á¼¯ÀÀ¯ÃÀª¿½«½»°Á¾¬¿¾°¿½¬À»¬¼½®¾¸¨¹· ·±­¤¤wwrq{dfdz_~r]{|fxdw[z`{w`~wdgdz`{u]|{fkwxxg|gYn`UkfSl]Kg`SdkMf`Uf`Qg`SggOidQi`Ki`Oi_KiiSi]Of[K`]Mb]Ok[IiWKb`Mn`Og`OfgSndOkdOidOolOnoUowSonWroYq_zkf+Ö(ï\ÅM»ì_¶^d¹]ëµ ¦ x {|xtrunrolrqnlkkktqw¦³»£Ç¦Â¦¬Û¨³ä¯·í¶¾ó·½ô¾ÅøÀÆúÃËúÅÌÜúÌÖ°úÌÖúÕÚúÏÛâúÌÛ´úÒÝúÕÛúÓÜúÓÞúÐÛúÑÛúÑÖúÊ×úÈÔúÆÎøÅÉÚÉ°ìÃ¼ö¼ÅbâN=ë1Ö¯¯Ð¡µ·¨ñïk®b|{xzzwuonlinloquxwutx~§»©ÀªÏ¢¯Ü«µäª·Þ¬¹à®·ã¬¸ä©ºÞ¦·Õ¥³Ï­Ì¯É©¿­½¡®Ð±Øª¯Õ©®Ö¨®Ð¢¯Ò¢«Ì¢¬Ì¦È¦vÆb"î4â,"ìoÂ]·VÎHîîðñsxi{|gtqWrfQngWndSffWl_QlbOd[MgUK_UK][K`YI_[MbYOdYOb_Kd_QbYMdYSbbSd]Mi[Sf`Mi]Qg`Oi_SfbWkdSnbSnlYw~oz{xxxtqodubzu_uw`wq_zrfxdzx_{t`x_xxbzugzk{|³°²ÃµºÆ´ÄÆ¶ÆÅµÈÈ¶ÇÈ¶ÆÆ·ÆÆ¶ÆÈ²ÈÄ³ÅÃ°ÃÂ´ÃÄ¶ÆÈµÅÇ³ÆÅ·ÆÃ³ÆÆ¶ÇÆµÄÃ·ÃÈ³ÃÄ³ÃÄ´ÇÅ³ÄÇ³ÅÆµÃÅ´ÆÅ´ÂÄ³ÆÃµÇÂ´ÃÁ´ÄÆ³ÃÀµÁÃ³ÃÂ³ÄÁ´ÃÅ³ÄÆ³ÄÂ³ÆÃ³ÃÁ³ÄÂ³Á¿³ÃÂ³ÆÃ´ÂÁ¯ÃÃ®ÁÃ´ÃÂ·ÅÂ³ÂÅ²ÆÃ³ÂÂ´Ã¾®ÁÁ°ÁÂ´ÆÂ²ÃÁ³Á¾¯¿Á¯Á½±Ã½­¾¾³ÁÃ­Ã½¶ÁÁ±ÃÁ°ÂÁ³¿¾°Ã½³ÀÀ³À¿¯ÁÁ°¾¾°¿¾®¾¿®¿Á°Á¾±¿¾³Á¼°¿¿°¿À°ÀÁ­¿¼°Á¿±¿¼¯¾»¯¾¾¯Á¼®ÁÀ¯¿¿­¾¿®¿½°¿º¯¿¾¯½¿³¿¾¯ÀÀ®¾¾°¾»¯½»­»¾°¼¾¯À¼³¿½­¾¼°¾¾«½¾¬»»°½¾±½½­¾»¯¾º¯¼¿¬¼¹®¿¾±À¿°½»®¿¹¯¾¼®¾¼®»º¬½º­¹»¬¾º±¾»«¼»®»¼¬¼º®¼º¬»º­»¼ª»»¬¹¹©¹»«»¸­ºº«»»¬»·«¹»­¹¹¬¸¶ª¹·©¹·¬º¸©º¹®º¶©»º¬¹¸¬¹·¬»¹«¸º¬¹¶¬º¸ªº¸«¹¹¬¾¹©¸µ¬¶¶©¸¹¬·¶¬»³¬»·§µ·¨»¸ª··¦·¹¦¸·­·¶¬¶·¨¹µ¬¶·©»¸©¶·«·³¨ºµ©¹´¨¸µ©¶³¬ºµ¨ºµª¸·¤¼·§´µªµ¶§··ª¸´«¹¶¬¶¶¨¶µ¦¶¶¥¹¶¬·³©·µ¥µ³£³·¦·µ©¸´¨¶´¦³·¨³µ¦¶¶«·¥¬¨²§²« ±«¯ª²®³©³©°¬²©±«²«³«±¬±¬³®³¬²¬²«°¬°«³®³«¶¬³¬µ«±¬µ¬²«³¯³¯¢·­µ­±®³¬¶°¯®´¬³¬´¬ µ­¶°µ®³¬´°µ°´°·°·«µ¬µ®·¬¡¶®µ±³¯·³³²¶®¸®¢´°·¯·®·¯³­¸²µ¯µ°·² ¸³·´ »¯£º°¡¸°£·²¢¹´£¸±¡¸²¥¸´¢º´¡»³¢¹±¤¸°¡»±ºµ£¸±¡¹²£º° º²¢¸²¡»³¡º² ¸³¢º´£º³·µ¥º³¤ºµ¢º³ ¸´ º³¥¼²º®¤¸´¡¹­¡½± ·³¤ºµ§½µ¡º³£½³¤º³£¼³¥¹·¡»³¥º´¡»¶¹´£ºµ£º»§½³§¼·¢¼´¡¾·¦º·¤º³¥½¸¡À·¦ºµ¤»·¥¼³¥¿µ§½·¥¼·¾¶£¸´§¿·¦¼·¦»¶£¾µ¦»µ¨º·£¼¶¤º·§¾·¢½¶¦½¸£¾¶¥¾¸©º·¨»µ¥¾·¤¼»¥¾·¦¾¸§¾º§¿µ¦¾¸¦½¶¥¾º¦¾ºªÀ·¦¾·¦¾º¦½¼§½º¤À¹¤¾¸¨¿º§Á¹£¼¸§¹³¢»±´¬©tokl|dzd`wWrUzoY|t_zqSzqUztU{rSwtYwY|zYzqU~nSz_{didkUu_InQFgSBdSDi[Ii[IdWIdU?fSDfYMg`BgWBfUFgUBg]?fW?fKBfQ=`Q=dQ?iO?fY?g[:l[DgW:gUDg]Bq_DldBrgDqkOngFwkKozYx{lvt{éU¾M¤~V¾Qôúó^ÆR¼¦·¦µ¥³¡© ª ­~¢«z |qulkkidd{`~``{]z]_ddgdot¥² ²¾¬Î¬Û¡µá¬·ê®½ó³Ãõ»ÆÙvÿÈÐ¥úÈÔúÈÕúÌÕá~ÿÈÔ®úËÜúÌÙúÍØúÌÚúËØúÉØúÉÓúÇÓúÂÎú¾Ìú½Ë÷³Æí³Áæ±¼Évö«®Ã¬¾©­a®Yçprdzd|bu]zbzbx][z`|_fffnrrt¤{¬±··¥ÆªÎ¯Ó£·Ú«³à­»â¬»à§·Û©»à­¼æ¬ºâ§´Ø£¹Õ¡³Î¯Ä°ºª´©¿¬Ê«Î«Ï¬Í¬Ê§È§§¤=Û5­z´}°k ì¥|±¬¦(ã"+ß% |qfz]{iQt_IoYKn[Dn]DiUKfWBkW?bO=bM:]QB_S?bS?bQ=dQBfY=`Q?`SBgMB`Y?dQBbUIfY?gUFfUFfYDiWFg]Fq[Fl]Moxb|ouwto~qngoodqS~qY~kSxi[tnY{kYzrW{lWznY|tWzu]r`~nq|£ ­¾®¼Á¯À¾°ÆÃ²ÆÁ°ÅÁ°Ä¾®ÄÃ±ÈÃ¯ÆÀ°ÃÃ³Ã¿¬ÃÃ°ÅÃ¯ÆÂ°Ã¿°Æ¾®ÁÁ±ÅÀ±ÆÀ°ÃÂ¬Á¾°Ã¾°ÆÁ®Æ¾¯Æ¿±ÅÁ°Ä¾¬Â¾±ÁÀ¯ÄÀ­Ä¾®Å¾¯ÁÀ«Â¿­Ã½­Á¾¬ÁÀ­ÂÂ³Â½¬Â¾°ÃÀ°ÁÀªÃ½­Ã½§Ä»¬¿¼¬¿»®Á»¬¾½©À½¬ÁÀ®Â¼­Ã»¬À¾®Á¾ªÀ»©¾¸©¾½«Áº­¾¼¥Ã¹©Ã¼¬À»©Á¸«Á»¬À»¯Á»¬¿»«Á»«Á¾°À»«¿»«À»«¾½¬¿»¨½¸¬¾»©À»ªÀ¸¬¾¹ªÁº«¼·«¾¸©¿¸­À»«¿»©¼º¬À¸©¾º§¼·ª»¹¥¼·¨¾»©»»¨½·§Áµ§»º§À¸©¾·§½·©»º¦º´©»»ª¾·§½¹¨¼º¨»·§½º¥¼¸«½¸¦À¼§¹·§¼¹¤½¶©¼¸¨À·«¾¹§»·ª½µ¨»¶©¿º§¸·¨¾·§¹¶§»·ª½·§º¹¥»µ¬Àµ¦¸·¥»µ¤º·¨¸·©»·ª»´¥¹´¦»µ¦º³©¼³¢¸³§»²¤º´¡··§¹´£¹´¤¸·¨»³§·¶¥»³¢º·¤»µ¨¸¶£ºµ©·´¦½´¤¹°¡º³¢º°¤¸´£»³£¸³¹³§·³¡¸² µ°¢µ³¦º´¤¼²§¸²¤¸²£º³£¸±£µ³£µµ£·³£¸³£·±¢·µ »²£¸² ·°§·³¡¸µ£·²¤¸³¥·²¥»°¡¸³£¸±¡·°¡¶³£µ¯´²¡·®¡µ¯¡¶®£·¬¡·²£·³ ·³¢¹®£²´¥¶¨¯±±®¡®±¤µ°³² ³°¤²³ ³®¡®±¤³±¡²±¢³°£²³¤³¶¦³±£¶²¢³² µ¯¦³¯¤±³£³³£·³¥´±¤¶´¤³²¤·³¤µ±¤¶° ³²¡´³¤³­£µ´ µµ¤·³¢·³¢µµ¤µ°¥¶³£µ´¢³±¡µ´£¯³£·±¡¶³¡¶µ£µ·¢µ¯¤·´¦³³¦µ·¥µ¶¢¹°§¹¶ ·µ£·²§·¶¥´´§·µ¦¹¶§µµ¥º¶¥´µ¦»¹¥µ´¥¶¹ªº´¥¹¯¦·¶«¸³£µ»©¼¹§¶·£·¶©¸·¨¹´¦··¥··ª¹¸§¹·¨º´¦»µ¨¸¶§»¹§µ¸©»·§·´©»·¤¼µ©º¹¥»º«½¶¨¹·§·³¦»·«»¶§·º¨»·¨ºº¥··¤»·©»¹¬º¸«¾¹ª¼´¨»·¥»¸§¼¹¨»»¤»¹«¸¹¨»¹¨¼·¨¼¸§»»«¾¹©º¼¦º·¬º·¬¾»ªºº¬»¼¬º¼«»»­¾º¨»¹¬»¹§½»¯¼»¬¼½­»º©¿»ª¿½¬¼»¨¾·©½·ª»»§½¹¬¼»¬¿»©·¹ª¾·¨¾½¬½»®½º«½»ªÁº¬¾º«¾»¬¿¼¬¿¿¬¼½«¼½¬À¹¨¿¼¬¾¼²¿¼¬Â»©»¼­Á½­¿¾­¿¼ª¿½®À¼¬¾¾¯¿½­Á»­¾¾¬¾½¬¾¾¬¿¾¨º·¥¶³¡±®ªwxqlllwbw]wd{~b~x_|x]zxb|w_|{b|_||`uo`w_~goqi|nYtbUq[Mf[Id[OfgQk`WgfSi_MfSKfbWkiMi`Ui_Og[KfkMi[QlYIf]IbYIg_Ki]KdbMddMnfOgbKgfMibQliWnoSrrQqnUtkQlr[t_xlwéSÀM¯³¡E×;%ì 7é,'î Jà=Ô¤­Ø¤²Ô¯Ó¬Ó¯Ò¯Í¯È¨Á¦½¤³ °¬§|{oqlkkikiikqqrr¬¶°£Ã§Í®Û¨³å¯·ÿ|ÛdÿÙÇÓ£ÝÏ¼öËÏçmÿàÇ×¯ÝÒ¿øÓ×úÎØúÏØúÎÙúËÖúÊÓúÅÓúÅÎú¾Êø·Èï³Ãâ¬»Ïjÿ¦¶È¬¬¥µ¯áZYig|d|_i_ikonxuªz°¹Á¢Æ§Ì¬Ì¬Ñ®Ò¢±×¦´×¨³Ü¦µà®·ä¯¹â³¼ã³¼ä¯¼á¬ºÛ¯»æ·ºêµ¼è´¼ä±¶à§µØ£±Ó®Å®»¨¿¨È«Ì¡¦Î «Ì¦Ê£Æ£¬¥¸ÁNÐA1ã+¶¼º©x	ù§o¨ |tiq_wgUnfUobUi]Sf`Ub[Mi_ObWMbUM_[KbUOd[QbYIb[Of]Mb]IdUMbYMb_Kf]Mi[Qk[MfdQf`OldOfbSnbSt`SrlWqxkw{ {uonxwr|gw_~z_{nf|zb~z[z{`{u`xub{|_{zgudot¡§¿µ¹Æ³ÀÇ´ÃÆ·ÄÈµÉÈµÅÆ·ÆÄ·ÊÈ·ÅÅ¶ÈÃ´ÈÅµÅÇ·ÆÅµÅÇ¶ÃÅ·ÄÅµÄÆ¶ÆÆ¶ÇÃ´ÅÅ³ÃÇ³ÄÃµÅÃ²ÃÈ´ÇÇ·ÈÆ³ÃÄ³ÅÃµÆÃ³ÄÂµÆÅ¶ÇÅµÅÄµÁÁµÇÅ²ÄÅ·ÅÃ²ÂÃ¶ÀÁ³ÄÂµÃÀ´ÂÃ³ÀÅ°Á¿±ÂÀ±ÁÁ²ÁÁ³ÂÃ±Ã¿µÃÁ´¾À®ÃÁ³Á¾²¿À³Â¿°¾À¯ÁÀ¬Á¾³Á»²À¿±ÁÁ¬¿¾³Á¿²¿Â­¿¿°Â¼³¿Â°ÀÁ¯¾¿³ÁÂ³ÀÀ²¾¿±ÁÁ°À¾³¾»³¿¾¯¿¿°Á»¯ÀÀ°¼¾¯¿À±¿½®½¾®¿¾°¿¾±Á¾¯Á¾®¾¿­¿¿­Á½¯À»­¾¾°¿»¯¿½®À¼®À»±»½®½¿®¾»©º»°À¾±½¼­¿»­½¿¬¾¾®¿»²¼½­À¿¯¾»¬½¾¬Ã¾®¾»¯Á»¬¿¾®»¼¯¾»®¾¼¬½¼¬½¼¬»½«¾½®»¼­¼»­¼º¯¼¿²¿»­»¼«¹»¬»»¯»»©¸¸ª»¼«»¼¬½¹©»¹¬»»©º¹ª»·ªº¹«»·«»º¬½·ª·¹¬ººª»¸«·»¯º¹©»º«¸¸¬º¶¨½¶«º»«¹¹¬½·¬»¶§··©»»©»¹¬¹´«¹º§¹·©¶¶¬¸µ«¸¶ªº¹¦»¸¨º´©º·ª¶·©¸µ¦º¸©¶¶ª··«»¶¯··¬»¶¬¸·©µµ«·´§¹·©··¬»¶¨»µ¨··ª¹¹§¶³¬µ¶ª¸³ª·µ¦¸·¨¶·¨¹¶ª·´¨µ³¥¶³¦´±§·´§µ´¦·¶¨³¶§¸·§·¶§·¥ªª­«±¬±©±¬°©²­²¬®ª±¬±­±«³­°¬²«°¬´­µ¬³­³¬±«´ª²­µ³·­²«³­´¬²«²­³­ ¶¬³¬³¬³­ ¶­µ¯µ¬³±µ¬³­µ«±­²¯²¬³°µ®¢¸®¡¶°´«·°°­´¬µ¬´°µ® µ°¶¯µ®¡³¯µ®¶®¡¸²·®·°·® ¸°µ²¡·­¸¯·² ¶²º´¢¸²£¹²¢·³¡»³£·±¢º³£º± ¶±¹°¹±·²£¹±µ±·± º±¡¸±¢·²¶±¡¸´¡º¯¡¶³ »µ ·³¸°¢¸³¢»°¡»µ¡»³»²¤º³£¹³¸³·´º´¢º²»´¤¼³¡»µ¡¼°¢¸³¢»¶¡»µ£»³©»²£»³§ºµ¤¾µ¥¾³£¼¶¢»³¤»·¼·§»µ§»´¥»µª½µ¥¼¶ ºµ£¼·¥»µ¦¼·¡½´¦½·¡»¸¦º³£»¶£¾µ£¼³£º¸ ½·§¼¸¦¾²£¾¸¥»µ¤¾·©¿·¦½µ¢¾µ¦½¹¥¼·¥¼·¦»¹¦¾¹¤½´£¾¸£¼·¨½»ª»µª¾º¤À·§À¶§Á·£¾ºªÀ¸§¼»¨¿¹§ºµ¡¸®¡µ­¬¤¦|xqrd{d{]t[|qY|rOzo[|w[{qS{tS{lS|iSzrWuzQxtSnSzn[_f|d{_{dOqYDlUFgU=gSD`WDi`Bg_?dU=gS?fYFf_Ok`IlWDgU?gYBdYDkO?kQB`Q:_O?iS8dW=gYFk[?kY=iY?k[DkdIlfIqgBqdDn`MrkMq~Y~`téX¾O½£uÁa,ê$¿­Û§µÃ´.î&}ÏgÛ¥µØ§³Ö¥·à¨·Ü«·Ø£µÐ¢°Î°É¯Ê«È©Éª½¥³¬z¦x¤ttqqlllidliqr£{¤~¬³Ã¥Ê®ÿ¾ÿùùù`èO¬Ùùûúú`éTìËÌúÈ×úÄÔúÆÐúÂÓúÁÑú¾Ê÷ºÈô³Ãí®ÃÿmÌ\ÿx¹l¥¨8Ö4w¤k|KµHåmvq~_]_][iio¡|¬{³¹ »¤Â¥Ì¨Í¬Î¬Ò°Ô¢±Õ¤³×¥²Ù©³Õ¢´Û§¶Ü©·à§¹Üª¸Ü«·Ü©¸Ü£¸Ü¨¶Ý«¹ã®¸ã®»àª¹à©¶Þ¨¶Ù¡³Ð°É¬Ã¨À¤º¤Á¤À ¿§Á¡À¢Á¤vºeô »··0á))ã$§¦ zl~_|nYr]Iq_Kk[DkUDgY?fOFfQDbSF_Q?fQ=_Q?bQ?dO?`U?dMDdO?bQ?bQF_Q:bQ=`Q?dQBgU?dUDdWFgUFf[Fo_Ii_Kro[|r{z|wgwixdili`rY|t[|tYzlY{oUxnYxnSwnU{rUzx]~t[t_kt¡µ«µ¾°¹Ä²ÂÄ¯ÂÂ­ÆÁ®ÁÅ²ÅÀ¯Å½®ÂÁ°ÆÄ²ÆÃ®ÅÂ¬Ä¾±Å¿¯ÃÂ¬Æ¾¬Á¾±ÂÁ®ÁÀ±Æ½¬Ã¿®Á¾­ÅÁ¬ÃÃ®Æ¾®Á½¯ÃÁ²Æ¾°Á½®ÂÀ­ÃÁ±Ã½®Â¾®Á¿°Ã¼°Ä¾²À½²¿¾¬Ã¿¬Ä»¬Ä¾°Å»®¾¿«À¼¬¾»­À¾¬Ã»«Á¼«Áº«À½«Â¹«¾½«¿½¬À½¬Ã¼¨½À¬½¹¬»ºªÁº¨¾¹ªÁ¹©¾¹ª½º¬Ã»«À¼«½¼­¿º¬¾¸«¾»ªÁ¼ª¾»®¿½©¾½ª¿»«Á½«¾¸«¾»§¾»ª¼»¬¼¶©¾»«½¸¬½»©¿¼«¿»ª½»§¿ºª½¹§¼µ¨¿»«¾¸«½¸§½¸¦¼¹­¼º«¾»¨¾º¬¿¸¦¼¸§¼¸§¾µ§½º¨¼º©¹·¨»·©½º¨»º§¼»©½´§»»¦¾¹®¾¹ª½·«»µ¨½¸¦¹¶§»µ¥»·§¾¸§½´¨½¸§¿¶ª»·§¹·¥»·¥·º¦½¶¦½¶§»³¥»¶¥¹³¤º¶§»³¦¸¸¥ºµ¤µ¶¥»µ£º¸©»µ¥··¢¸´¤º²¦»·¦··©»³¥µ´§»µ¤º²¦º¹¥¹·¥»µ£º´£»³¥¹¶£¸³£»³§·²¥¸´¦»±¤·¶§·²¢¸³¤¸³£¹²£µ³¥·²¡·² ³³£´³¢·±¥´³¢µ²¢µ±£·²¥·´¢¹³¢´³·³¥µ¯¡¸²£·²£¶°¢·°£³°£¶°¸°¤¸±¡²²£µ¯£³²£µ¯£µ°£µ°µ±¢²°¢·¬ ³¯¡³®£µ± µ® ¶±¥³±£²ª «³¤³²¯¯¢´­ ±²¤¯°¢¶³´­²®£µ­¥³° °³£³¯¡¯´¦´³¢³°¡±³¤±²£³®¢±²¡±³£³²£µ±¤´±¡³³¶³§³µ¨³±¤¯±¤²°¤³°£³²¡´°¢µ²¤¶³¤°¶¤´´¢¹³£³³¤³±£´´¢µ³£³³¤¶²¢³´¤·³¡´²¥³³¤µ³¤¶³¥³²¢³³¥´´¦µµ§´´¥·²¥µµ¤¶µ¡·´¦³³¥µ¹¤µµ¤·¶¨¹²¤¹¶¦·µ¨¸µ¤·¶¥¹µ¨¸¹¦¹³¨¶µ§·»¥¸¶§·µ¦´·¥»¶§·¶§´¸¨¹¶ª·µ§»·©·¶¦»·¨º·ªº¶¨¹¹§¹¸¦¹·¥¸¶¨¹¸§»·§··§¸µ¤¹¶§º¶£»¹¨·¸©»¹©º·§»º©¼¹¨··§ºµ§»·¨¹º©»¶¦·¸¨º¹§»½§½¹©ºµ©½ºª¾¹¨½¹«»¹©»»¨¼·©½¶¨»»«¼¼©º»«½»«»º©¿º¬¼»«º»§¼»¬»»ª½¼©¼º©¾¹«¾¾¬º»«Áº¨»»©¾»¬»»¬»¹¬»¹¬½¸©¼»¨½»¬½»¬½¹ª¿¼©½»©¾½®¾»ª¿»¬½¹ª»½¦½¹ª»¼¬½¼©¼»¨¼¹­¼½­Á¼¬»»¬¿»ª¿¾®À½¬À½ª¿Á¬¾½¬¼½¬»»¯¾½¬»º¤¹®°®«¥~znkbzb~r[~x`zx`|{d{w[~x`xw[r_u{`{~_{xdzb{|fdg~|f||bxkQo_QkfUf]Mb]Of]MddQ`dQdWFi_Ig_Skq]nuSl`Si]OfgKg]ObWKg]Ib`KdYKf[Kd_Qf`MdbOg_KiiKibQkoQlnOkrSlgQlkSor[rÿi}ëdÊSÒ«¡»(ð ÊyÀ»Îz&ò ¨Êå®¹â°¹Ý±¹ä´»è¶¸ã±·â²·æ¬ºÜ¬·Ýª·Ý­µà¬³Ù¤²Õ±Ñ±Î¬Ì«È©Ã¨¿¢º£·µ­~§x¥xq¡z¦¬¬¯³ Á¥Ç¨Ó ­ÿÅ· ¹ÇÁÐÁÑÚÏ³òÍÊÚÒºÁÙ¥ÁÙ¥ÁØ¥ÚÓ»øÏÕúÌÖúÊÓúÊÒúÅÓúÄÎú¼Êö»Èó·Áÿ¤¼ÿ÷õõGÒ=¬eµXêéçvqniont x¨¯»Ã¢Ê¨ÍªÐ¬Û¦³Ý©²Þ§´à®³ã­·à°¶à¬¸Þ«µà­·Ø¬µØ¬·à¬´á®·â¯ºß¬·à®¹à¬¶ã°¶æ®ºâ­·â¯·ä¬¸â¯ºã°¸ã²´â®¶Þ«±Õ¥®Ð¢®Í¨Å¥Á¥À¡¿£¿ÁmÅ^ÿ¬|À ¾Á«|	ú±l³¨¢ukw]wiYlbUnbQb`Qd_KdWQfYO`[O`_M]]KbYK`[QdUK_[O]WMb]Ob_M[YOfWK_[M`[Q`UMb_M__Qb`OkbMfdMliQnkYtrf|{zzzn{lnownkxd~{li~ukzz`xr_x|[{u_{dw~b{xf~{fzz´¬µÀµ½Æ³ÂÃ¶ÁÅµÆÆ´ÈÅ°ÅÃ¶ÈÃ¶ÇÆµÅÈ¸ÇÅ´ÃÇ²ÁÅ·ÅÉµÅÇ´ÆÅ¶ÆÂ³ÆÅµÃÅ³ÆÅ´ÅÆ³ÄÃ¸ÃÄ²ÄÃ´ÆÅ³ÃÄµÃÂ±ÃÆµÃÄ³ÆÂ³ÇÄ´ÆÂ³ÅÅ´ÂÅ´ÀÄ²ÆÅ¶ÅÃ²ÃÂ³Ã¾³¾Ã­ÁÃ²ÅÂ´ÁÃ²Á¿¶ÂÃ³ÂÁ®Â¾­ÁÁ¯¿Á±Â¿´ÂÀ²¿Ã²ÀÁ²Ã¿³Á¿²¿Á®¾Á³Á¿°ÁÀ­¿¾¯¾¿³¾¿°¿½³Á»²Ã¿²Á¿²ÁÁ®¾¿±À¿³½½¯¼¿ªÀ¿®Á¿°Á¾®Ã¾­½¼±Á¿±Á¾­¾½°¾»¬ÀÃ³¿¿­½Á¯¾¿±»¼­Á»±¿¼¬¾¼®»½°Á¿°¾¿­¾¼®¿½®¾¼®¾»­»¼®¿»­¿»®¼º®»¾¬½»¯¿¿®¿½¬À½¯¾»¯À»®½¼­½¿¯¿¾±»½¬¿¾°½¼­¼»¬»¼¬À»®»»¬¿¸«»¼¬»½­¿»¬¼¹¬¼»²½¹®½»©¾»®»ºª¹¸¬¼½¬»¾¬½¹¬»¹«¼º¬»½¬¼¹ª¹¹®º¸ªº¸¬·»«»¹ª¸»­»»¬»¸ª»·¬º»«¼¸ªº¸­ºº©··¬º»¨¸¹¬º·¨¸»¬º¸­·¸©¹¸«·¹¬»¶«»·¨»·«»¸©··¨¶·¨»·«¹µ«¸¹©··¨¸¸§·³¬³·©º·¨¶µ«¸µ¨¹·¨··¬¶¸©·µª··¨µ¶¨·µ«¹µ¨··ª··¨·³§´µ¨·¶©·¶¥··©µµªµ³¨¸´§µ³¦´³§·µ¦µµ¥³³¨¹µ¥µ¶§µ³§»µ¨³²¥¶´«´µ¨´£««±§¯«±©³©°«±«±¬³«¯¬³«³«³ª°¬µ®´¬±ª²­³­³¬³¬°ª²¯³®³­³¯²ª³®±¬µ¬´¬³¬µ¯³¬µ¬²®´¯´¬³¬¶±³®³¬³­´ª·®µ­³¬¶°¶¬³­µ¬´¯¡µ°´®·®´¬ ¹¯³®´° ´²¢¸­¸²µ°·³¡·±µ¬¡µ±·¬µ³·­¶¯£¸±¢¸±·±¸³¡·²¶±¡·³¡¶¶¡½³·²¡¹±·¯µ³·®·²¢¸´¡µ³£µ²º°¹³£¸¯¢·³¢º¯¢º°¸´·²¸³¼³·¯¡º²¤»³£¸° »³¹²»³£º³¢¹³¤»µ¥·²¤»µ£º²£º´¢¼³ º¶ ¸¶¤º´½µ§º·¦¼¶¡¼´£»µ¥»³¥¹µ£»µ¡»µ¤¾¶¦¼¶¤¾·ª½¶¤»´¤»·§¾¶¥¹·¥¼¶£¹µ¥º¸£»²¦¾¶£½µ¡¸¹¤¾µ¥½·¦ºº¦¾µ¤»³£½µ§¾µ¥¿¹£¼¶¦¼¶©½´£½»¥»µ¤»º¤¾·¥¾·¦½³£½»¢»¶¦À·¥¾¸¤¼µ§¾·§¾¹¤¼¸¥¾¶¨¾¹§¾¶£¹²·¬­©¨urtndg]tU~kW~oY|uW~oU|kYzuW{uW|oWzwYx]ztYwY{t[~w[u[|t_|rUw_InSDgSIfM=dQBdOBdQBfSB`WDdSDgYDg_QidOk]DkWFgYBgU?fO:fUBgY?fS?gSBgY=dY?g_=lS?g[BnW?ldFngInkKqY?ndIqÿ~`ÿ£\ÆM³|Õ¯Ý¥³Ïi&ò(ï!$òyÒdá­¾Þ«»ß¬»ß®»ã®½á±»àª¹ä®¼ã®ºá¬»á®»ä®·ã­¾ã¬¹à­µá©ºá©µá¤¸Û¤·Ø³Ó®Ò®Î©Ë§Ã§Á¤¶±«¥|¬°³³ ¹¢½¥Æ©Ë®Õ§¶ã°ºô¹Ãú¾ÆúÃÐúÊÑúÊÔúÉÔúÌ×úÊ×úÊØúËÙúÈØúÅÕúÁÐú¿Îú»Ìö·Êï³Äê¯¾æ¨»ÿ±¦£~£}®¬|pisonlt§u¬|·¾Á¦Ê¥Ñ®Ô¢®Ý£´Þ§³â«·â°·ä¯ºâ­¼æ¬»â¬ºß¬ºá©¹Ü©´Ü­¶Þ©ºÜª³Ý¦·Ú¤¶Ù¤´Ù§µÙ¦µÚ§µÝ¬·Ý¤µÛ¥·Ü¨´Ü«·Ýª¸Ù«·Ù¬·Û§±Õ¤´Ð®Í¬ÊªÄ©¿£»ÿ`ÇRÿv¹c¥£··=Ú3"ê«®«~~qdo]|gOq]IkWFkYDfYFbSBgS?]KDbO:`MB`QD`UDfI?`O?`SB_I:`Q:dM=dQD`O?gO?_Q?dQ?g[:gUDdWDg[Ik[KofIrl_ziqoxofxfgzgni_t]qb{`~q]~oUzlYxoSzkU{lU{rY|qW~t`znt|£¢¬½²»Ã¯¾¿®ÁÀ°Å¿°ÅÁ¯ÄÁ°ÃÁ®ÄÀ±ÄÁ²ÃÁ®ÆÁ°ÃÅ°Á¾³ÄÁ°ÄÁ¯ÆÀ²ÄÁ­Ã¿¯ÃÁ­Ã¾±ÀÁ¯ÃÁ°Ä¾°Â¾®ÃÂ®Ã¾±Â¾¯ÄÀ±Ã¿­Ã¼®Ã½­Å¿¬Â¾®¾½®¿¾®Ã½­À¾®Á¾®Å»®Ã½®À½±Ã½®¿¾©À»©¾½¬Á¸¬¿»«Áº±¾¼¨Â¹¬Á¾©Á½©À»«Ãº©¾·«¼¼«¿¹«Â¹ª¾¹ª¿¸©¾ºª¿¸©¾»¬¾¼¬Á»ª¾¼ª¾»©¿»©¿º«Àº©¾»¦Àº«Á»«Ãº¬¿»ª»µ©Áºª¾»¬½¸«¾¹ª¾»©¾ºª¼¹ª¼·¨»»¦ÀºªÀ¸§½¸§¾·©½¸¬½º¨½»ª½ºª½¹§¾¸¦¾·¨»¶ª¿µª¿·§»¹©¿·ª¼¹©»·©¾¸«»¹¨¾º¬¾·©º¹«¾¸¨¼³«»»§º¸¬½µ§½·§»´¦»·¤»¶§¾·¤»´¨»¶¨»·§»µ£»·¦»·¤»·§¼¸¥ºµ£·³§¸·©»µ¤»¶§¼µ¤··¥·³©·³§¹³¸²ªº´§º³¥»·¥ºµ«»´¥¹°¡¹³¤¸µ¦»³¦¸´£º±¤º¶¥¹³¡·³¦¸³£¸³¥º¶¥·³¦¸´¢·²¢·³£·±¥·³¡¹¶¦¸²£·±µ®£¸·£¶°¤·²¤·²£µ°£´°¢´²¡·±§·²¡º±¤·°¢µ²¤µ²¡¶²£·²¡·¬¢³²¡·°¸° ·±£³­£¹³¡¸±¢¸­¢³²¡·µ¤µ¯¡µ®£³°£µ¯ ´°¶­¢µ²·°¡¶®¡³­£³³ ´« ¬± ­¬ ²°¤³«¡´±¢²²¯± µ³ ³²¢¯°¦³¯£±²´²¤³±¯°³³¨µ±¢²·¡µ±¤²°¡°²¢µ°¥µ³¢´³¢³²£³±¦¶²¦³³ ´²¢´¸¢¶±¢¶³¤¶´£µ³§¶µ¥³³¥´´¤´µ¡²³¤³³ ²³¢³³ ³³¤²³¤³³§¶¶¡µ³£µ³¤µ³¡µµ¤¶µ£³´¨¶·¢´³¥µ³£´´¥¸µ§·³§³¶¤·´¦¶µ©··¦·µ§¶¶¨¸·ªµ¸¥·³¤µµ¤µµ¦·´¦¹³¦·¶¤·¶¨··¤¹·§¸·©¹»ª»¶©º³¥º¸©·¶ª¹´ª¶´¥·µ©¹¶¦º»©º¸¥··¦·¶¨»¸¥»µ©¶·§¹µ¦·¶©»·¨¸¶¦·»¨»»©»¶¥¹µ©º·§º·¦¸¶¥»·§·¶¨º·¬º·¥¹·§»¸©··¬¾·¨»·©¹º¬»¹¥¹¶¨»·¨½·¬»¼¬¼¹ª½¸©½¹«¿½«¼¸¨»¸¬¿»­¾¼¬¿º«º¹¨»½­À»¬½¹ª»¹¬¾¹¬½¾©¾¾§¼¹¬½¼©¾»¬»¹ª¿¸©¾¿¨»»¬½»¨»¼¬¾¼­¾»¬¾¼¬À»¬À¿­¿¾«Á½¬¾»­¾½«¾¾¬¿»¬»¹ª¿¹®¾¾­»¼«¼¼¬À¼¨¿¾¬½¹«»»¬¿¼¬»¼ª¼¾®Á¾¬»º©º·¡·³­®¥xx~wtuixfud{b~{gxz_{ubzw`zxd|_~f|~b~zk`|gbg~fxu`xfQkbOo`ObWKf]Kd_Ob]Mf`Id[Qb`MgbOidSibSigQi`SkfKd_B`[KdYOi`Oi_Kb]Ki]Kg`MgdQk_KddQndUkoQkuUooWogMoiWrz_xÿ¹É¢Õ¤­Ù¨­ãª¹ä«¹Èº¢¡ÅÇ¹¡ã³»ç³¾é¶¼å±»äµ»è¸»æ´»è³¼êµ¾ì¹»ì·Âë¹Áíº¹î»Àïº¿ëº¼ï¸½ï¹¼ï¹Àí¶ºê³»è­»æ°·à¬µâ¨±Ú¦®× ®Ð¨Í«È¤Ã¡¿¢»Á Å£Ã¥Ä§É§Î¬Ù¤³ä°ºô¼ÃúÅÆúÇÌúÏÑúÏÕúÑÖúÒ×úÒÝúÒÛúÑÛúÌØúÈÔúÆÒúÄÐú½Ëö¼Åñ¶Áë°¾ä«¸Ó¡µÒ¯Æ©À¤¾º´³¯¬­²²º¾ Å£É¤Î§Ó£­Û¨³ä§´ç´·è±¹ëµ¸ïº»í»»í»¿ì¶¼ì·¿é¶»è·»ç²ºã¬»â¯µá³·á¬·Ý¯³Ý®¶Ý«¶Üª³ß­·Û¨·ß¨³á®µà®¶ß¬³ß«¶Ý¯µß­·Ý¬·Þ­¶Ù¬±Öª®Ø¨±Ð§¯Ê¢¨È¤Æ¤ÿ³vÿ÷
öõHÖ<³®¡G×9¥·¶¬§{qg|nWoiQifYibQg_ObbQ_`IgSMb[K`[Mi_KbWOd_Od]K_[O`WK_[K_SId]Mb_Kd]K_]Kf]Mb]Kf[MgbQlbSikWloUnn`xo{xx{wotlw|to~ndwd~zi{~gt_xubxxbzw[ur_zu]x|ix~f|qwz£¡¤½´·È³¾Ä³ÀÇ¶ÅÇ³ÅÈ¶ÆÅ³ÃÆ±ÁÈµÅÄ¶ÅÅ¯ÂÃ´ÅÆ·ÃÆ·ÆÆ´ÄÆ¶ÆÁ´ÈÆ¶ÃÆ³ÁÂµÆÅµÆÁ³ÅÃ´ÁÈ·ÃÅ²ÅÅ¸ÅÄ³ÂÇ´ÅÂ²ÃÁ²ÁÅ²ÅÃ¶ÂÃ±ÄÁµÁÅ³ÁÈ³ÉÁ³À¿³ÁÁ°ÂÃ³ÂÃ·ÁÁ³ÁÂ³¿¿±ÃÃ³ÀÂ°Â¼°ÀÃ³Á¿±ÁÁ°ÂÀ°ÂÁ°¿À²¿Á¯À¾²½Á³Á¿®¾À°Á¾°À¾°À¼¯ÂÂ®¾Á±¾¾®¾Á®ÁÃ±ÀÀ­¾Á°Á¾®½¾±ÀÀ°¿Á¯¾À±Á¾±¿½®¼¼¯¾¿°Á¿®¾¾­¾À³À½°»¾³¿¾°¿Á¯¾»°½¼¬»¼¯À¾­»¼­»½¯¼»­¾¼¯¿¿®Á¾®¾¾±¾¾¯¿¿¯½»²»¾­½½­À¿®»¾¬¼½°¾½®¿¾­¾½­¾»­¼¾®Á¾¯¾¼­¼½²¼»°½¿²¾¼®¼º­¼»­¼½­½»¨»¹¬»¼¬»½°»»«½¹­ºº­»»®º¹¬½»«»»¬º¼¬»·«¼½¬½¹®º·®»¹¬¶¸¬»º¬¸º¬º·¬¹¹¬º»¬¼¹ªº·ª¹·¬¶·¬¼º­º»¬¹»«¹¸¬º·¬º¼¨¹·©´º¬º»ª¸¹¬µ¹¦¸¹ª¸¸¬º·ª¹¹ª¶¹§¹µ¨¸¹®¸¹§¹·¨¶·©µ·ª·µ¨·´¨·¶¨µ·¬·µ¨¶¹¦µ·ªµµ¥¸µ¨µ·¨¶µ¨µ·ª¶·©º·§·³¦·¶ª´·¨·¶¬·¸¦´³ª¹´§¶²¨¸µ«´´§µ·§µ³§´·¦·±¥µ°§³·¨¶³§µ¶¨³²¦µ³¦³³ª¶¶¥¶¥ª«²ª±©²«²©µ®³¬²ª®¬¯ª®«²ªµ«³©²­¯¬³¬³®±«³­³ª³©¡³¬±¬³­³¬¶ª´®³ª´­·­µ­´®´¬²®¡µ¯´¬´­·«³¯µ«µ¬´¬µ¬´­³®¢³°µ«²°³°³®¡³«µ®´«µ°º°·®·²·¯¶¯¡µ­´¯¡·¯¡¸¬µ¯¡·¯µ°¸µ¡¹±³±¡·´¸±¡¸° ¸³¤·®µ²·¯¡º± ¸³£»¯£¹³ ·³·±£·³¢·°¸² ··¢¹±¡¶±º®º³µ²¤·¯»³¢·²£¹³·±»²¥»±¥¸µ¡¸³ »²£½´¢·³ ¹´¡·¯¢½´»²£º² º¶¡¸²£¾±§¼²¡·°£»´£»³¦¼³£¾²¥º³ ½·¤»¶§¾³£¹µ£»·£»¶¡½³¢½µ¡»¶¢¼°¡»³¦¼µ¥½·¥¾¸£¼µ »¸¥¼³¤¼·¥¼·¦»·¦¾¸¡½·¦¼·§º·¡½·§½·¥»·¤¼·¢¾¸§½´£¸·¤»¶«¼µ¤¾·¦½·§»¶¥¾·¥¾·§½·§¾·£¾¶§¾·£¾·¥½·¤¿·¦¼³£¾¹©¾»§½·©»¶¤º±¶­­¤£rqztn~gdw]qWzrSzr[|qW{tS|qS{tSnY{tYx[~qYt]z[w[|[|wW|rYxkQz[Kq]IgYBgKDdODbO=gM?bUBdQ=fQDgWBfWDd[MiiDoYIlYDiW=bU?gO=bU=fQ?dWBfS?kYBgUFd[?kW?i_BqlIqkOlbIo[DndOuuYzk{º£Å§Ì¬Õ¤³Ø¤³Ý£¶Ú¦·Ü§´Ø¨·Û©ºß±»Ý¯»Ý¬¶á°»á¯¸à¯ºà°ºâ¬¸ç³½æ³»ç³¼è³»æ³½é³¿éµ½é³½èµ½è³ºë´¾îµ½í³¾ê²»ç®»æ¦¸á§¶Û¢¶Ü£°Û¬Ó«ÎªÌ«È§Ã¦Ã¤Â¥Å¥Æ¬Ç¨Ð¡²ß¬µê´½ô¼ÈúÁÌúÅÓúÊØúÏÛúÎÜúÍÛúÏßúÎÙúÌØúÈÙúÃÐúÁÐ÷»Êó°Çì²Áç¬¼ã¥·Ô³È­Ã©¼¦·£µµ³|²´¹À Ã¡Ê©ÊªÒ«Ò°Ú¢²ß§±ä®·æ®ºè±ºæ²»é²»êµ¼ç´½æ°¾â°¹á°¹á®·á®¸ß¬¸Øª·Ù§µØ¦³Ô¨±Ö£³Ò¯Ð¢°Ö¯Ó£°Ø£³Õ ±Ö¢³Õ£°Ö¢²Ô£³Õ¡±Õ£²Ö¨³Õ¤´Ö¨³Ô¤°Õ£¬Ì¬È©È¦À£»¢ÿ¥¬{¬}¬¤¡¹·¹··°¬¨{nx_|iQu[Kl[KkSIgU?fWBfFDdM=fM?bIB`Q?bSDbM?dU?dQ?`QFdQ?`UDbOD[S?fS8`QDfQDbYDgUBdWDgYDndKldOugYwzdtwnngzfllkbw`|`nSofboYznY|lS{iOxkSukUxu[zr[|ublr°§µ¾®¼¾®¾Â¯ÃÁ²ÇÀ®Á½¬ÆÀ°ÃÁ¯ÇÁ²ÅÂ­ÃÁ³Â½¬ÅÃ°Æ¾®Ä¾­ÄÁ®Æ¿²ÃÁ¯ÃÁ¯ÅÁ®ÆÁ­Á¾¬ÅÀ³ÅÀ¯Ä¾«Ä½¯Æ¿°Ã¾°Ä¾­Å¾±Å¾«Á¾­ÁÁ«ÄÂ¯À¾­Ã¾¬À»¯Â¿¬Á¾§À½¬Å½®Ã¼«¿½©Àº©Á½¬Ä½¬Á»«À»«¿½«Ã¾¥Âº¬Àºª¿»©À»«¼»©Á»«¿·­¿»«¿¹«¿¸ªÃ»¬Àº§¾º­À¸«À»ª½½¨¾»¬Á»«¾º¬Á½¨¾»ªÀ¸¬À·©½»«¿¸©¼¶§»¸¬¿·¨½¶ª¿¸©ÀºªÀº¬½¸©½¹§½º§¿·¬¿·¥¾¼¬½µ©¼·«¾·«¿¸¥¿µ©¾¸©¾¸«¿·¤¿¹©¾¸©¾¸§½¸ª¾·¨¾·§¾»ª¿³§½¸¥¾¸¨¼·¬½µ¨½¹¨¼·¬À¸©¾¶©¼¹¨¼·§¼·¦º¸¨»´¨¾·ª¾¶§»µ¦¼·¦»·§ºµ©¾µ¦½·©»µ¤¹³¤º¶¥º³¥»·¥¼³¥¹³§½µ£·²©º·§ºµ¥º·§¸³¦¹´¦¹µ§¹¶§¸±¥»³¢»³¥¸·¢»µ£¸±¢»µ£¸²¦·µ¥¸´©»µ£¹´£»´£¸³¥¹³£º²¦¸µ©µ³£»³¤¹±£·±£·³£¸±£»´¢·¯¢·³¦·³ ·³¥µ±¢¸¯¡´²£µ®¦·µ¡·±¡³®¤¶¯¢·°¡µ°¢¸¯£µ´¢´®µ±·± µ°§·®¡³²¡µ°¡·²¡¶°¶®¡³®¢³± ¶°¢³ª¡´±µ±£µ¯£´®¶± ±²¢´© ª¯ ´°¡³¬®²£´­±³²±¤³³£²³£³°¢³²¡®²¡²±£°¯¡±°¡´³¢´± ³° ³³²³ ³µ ¯³¢´°¢³²£¶µ¯²£³¯¤µ² ³³¥³³£³´¦³³§´µ¢µ³£´µ¥³³¤³± ³± µ³¤°³¢±¶£·µ¤µ´£¶±¦µ°¤µ´¡³³¢³³¡³²¡³¶¤´´¥±´¡µµ¦´³£·³£·³¥µ³¦¸µ£¶·¤µ´£·²¦·µ¤»³§¶³¥·µ¦¶´¤·¶¥µµ©¸¶¤µµ¨¶³¤¸¶§¹·§¹³¦¹·¥¶µ¦¹¸ª¸¶¥¶·¦¹´¦¹·¥¹·§¼µ§¸¹¤¸¶¦·¸¥¹·¦¸·¥¶·¥»´¡¹·¨·¶§º¶¢¹·¦¸µ©»¸¨¸·¨ºº¨º´¨º·©»»§¼·ªº·¤»´£»µ¥¹¹©¹º¢·¹©¾·©¹¶§»»¬»º©¹¹¨»¹¦»»¦½ºª½¶¨º·«º·¥»¸ª¸»ª¾»§¹¹¨»¹«»»ª¿»¦½¹«»¸¨¹·¬¼»©»»§½º­½»ª¿¹¬½º¦»µ¦¾»©º¼ª¾»¬¼¾¨¼¾¨»»®¿»¬¿¼¬»¾¬¼»©¿¼¬¼»©»¼¬¾»©¾»¬»¾¬¾º¬¼¾©Ä¼­À»­º¼­½¾©¾¼ª¿»ª¿»®¼¼¬¿»¯À½¬½¾¨¼¾¬¿»ª»¼°½º§»µ ³´¬¡¢z|~ulizf|w]xz`z[{w`zz`~x]xx]{ubx~]d|{d~dn|_g~`zx`uoYxfSoiSi`Kg_Kf[K]]Id[K`_If_Kb]Sd`If`MfbSdnUlkSnfMg`IfYKfYKd_Id]Fd_OdbMifOi]QbfKkbKgkSnrOrwUilSndMkr]wg|w­ÀÈ¥Ð¨Ó§°Õ¢¯Ù¨³Ú£µÜª´Ø¥¶Û¬³Ù±¶à³¶ã°¸â³·ä³·â°¶à³¶á¬¹ã±´ã¯¶ã±¹à¯¹á±¶à²»â²·ä°¸å³¾è²¹é¶ºì¶¼ì·¹î·½í·¹í²»ì³ºé³»ç­·æ©µæ§¶ß§³Û¢®×¯Ó¨ÐªÎªÎ«Ð¬Õ®Ø¥³ä®¸í´Âó¿ÆúÈÌúËÖúÓÙúÖÜúÙÞúÝáúÛãúÖâúÕÝúÐÛúÍÖúÊÐú¿Íö¸Èñ¶Ãë³¾å«µÚ¤±Ò¬È§Æ¥½¢»¾À Ã¢Ê£Î¦Ò§Ø¬Ü¨¯Þ§³à¨±å¬´ç­·íµ¹ìµ¹éµºé¶»é´½è´·ä²¹ä¯¸â°¸Ü¬¹ÜªµÛ¬¶Ù©±×¦³Ò§²Õ©³Ô¦®Ñ¥¬Ð ¬Ð¨Ñ ¨Ð¡ªÔ¡«Ö¢¬Ø£§Ø¤®×¤¯Ø¥³Ù¤°Ö¢®Õ¦®Û«¯Ø©°Ù©®Ö¨¬Ö¥¬Ð¦¬Ì¬Í£©È¢Ä£Ã¼¾Á¢ÅÆÃÀ ¼¼½¹´® td~o]tnQndSk]Qi]Kd`MbUO_YF_UM_[Kb]O`YK`]Od_K]`K`[Od[M`[K`_Q[[Oi`K]`Qb]MibQf[OgbKldMokQlkYro[uq~zuxllulnnnnbxknzg|tb{x[xo_wt[xnYuzfz{bzi|r¬§¬Â³¸Ãµ¾Å³ÂÆ·ÅÇ·ÅÃ¸ÅÆµÇÇµÅÅ³ÃÄµÄÆ¶ÃÆ³ÃÆ¶ÈÃ³ÂÈµÆÄ·ÃÃ³ÃÅ¯ÆÇ³ÃÂ´ÆÆµÃÁ±ÃÅ³ÅÇ·ÆÄ±ÃÃ³ÂÅµÂÃ´ÃÃ³ÁÃ³ÃÃ³ÂÃ³ÂÃ±¿Á¯¾À³ÃÃ²Â¾³ÁÀ®ÃÁ±ÂÄ±ÁÀ¯¾½¯ÁÁ°¿½¯Á¿®ÅÁ¯ÀÁ°ÁÃ­¾À°ÀÀ¯À½¯¿½®Àº°¾½¬ÁÂ®¿Â¯¿¼®¾¾¬Á¿¯¾¼°¾Á¯¾¾®¿¼±¿¿¯½¿®¾¾«¾¿¯À¾¯½»¯¿À¬½À¬Á¿­¿»±¿¿°¾½®½½®»Á¯¿Â¬»º­¼½°¼¼¯½½°»À¬¾¾³¾¾¬¾»­½¼¯¼½®¿»¬»À¯»¾¬»»­¼»¯»¾¬¾¿®¾»­½»¯¾»«¼·­¾½°¾¾­¼½­»¾®¾º°¾¾­À¼«º½¯½½®¾»®»»©¼»­¾»°¼»«¼»ª¼¼¬»º¬¼¹®¾º¬»º¬º½¬»»ª»»¬¼»­¼½©»¹­¹¹¯¼º¬º»¯¾·¬»º©¹¼¬º¹­»½§»¸­¹¹­»»¨·»¬»º«¹»®»¼¬¹³¬»¹¬º¹¬º·ªº»«¹¹©»º¨·º¬¸¸ª¹¹«º´­·¹¦¹»«·µ§º·«¶»¥·¶©·¹¨·º¬º·­··ª¹º©¶·ª¸·©¸·§µ¶¦¹¹«¹·¥·´ª¶·¦··¨¹»ª»¶¦·µ©¶¹©··­·¶ª¶·©µº¦·º¥³¸ª³³¥¶³¦··§¹¶¤·³¦¶¸¦¶µ¦¹³¦µ´¥³¶¦¶³¥µ·§³³§´³§¶¶¥²¶¨³³¦¶´§³³©µ´¦²¡«©°«®®°­¯¨³«²¬³¬µ¬µ¬³®´®³¬­¨³« µ¬³ª µ¬³¬³¬µ¬³¬±¬´©³® ´°´«´¬ ³¬³¬³« ´®µ¬´©³­ ²¬¢µ®·¬±¬·¬³«³ªµ­´¯µª´«´¬¶¯µ® ´®¶­ ¶®¶±¡´®³¯ ³¬²°·®µ«¶¯¶¬¸°µ®¶¯³°µ®·±´±£¹±¡·® µ³¸®¶±º¯ ·®£¹³»² ¹°¡·¯¡¸°¡º±£·±·°¸°¢·³¢¸±·´¡¸¯£»¯¡¸¯¹³·³¡·°¢·¬¹±¢º³£¶±¸²»±¡·µ£¸³¢¸¯£»µ¡¹¯¡¸° ¼³£¹³ºµ£¹²¦¹µ¸³¦¼µ¢¾·¸²¤·³¡»µ£»²¦»³¤¼³¤½³£½²¦»·¡»µ¦¹µ¤»³¡¾²¹µ¦»µ¡¾³£»´¥»¶¦½´¡»¶¦»µ¥»µ¢º±¤½´£¾µ¤º²¦¾µ¦½·¢½¶§½´¤»·¤»µ§·²¢»¶£»µ¢¾³¥¼·¥½·£¼²£¾¶¤¾·©¾·£À´«½·¥»º¥¼´¦Á¹¤¾º¥¿·¥¾·§¿¸¥¿·¥¾·£½¸§½µ¦»´µ¬±§«txxul`~`t[lW{qW{tW|k[~qY|nSxgUnUzrYxt`~t[z`{`w]|Y{xW|nQuiKq]Kt]FiYDfKDgQ=fU?dM=gSD_SD`S?dU=gU:dQDkUFlYDibIiU=iQ:dO=gS?dQ:kQ?kY?fU?gW?kUDdY?o`FndKnkIo]BlYDniUt`r®ÁÁ¥È§Í­Î¯Ð°Ð²Ó ²Õ£³Ö£±Õ£²Ö§²×¤´Ó¦°Ò£³Ï°Î ¯É¬Ê¬Ç°Æ®Ê°È³Ë²Ê³Ì´ÌµÏ³Ó¡µÕ¦·Ö§µÞ§·á¬·â¬»â¨·â¬¹á©¸á¥¶á§³Û¢³Û¢³Ù²Õ°Ò­Ð­Î©Ì¯Ì­Ø¥²âªºê³¾ï»ÇúÃÐúÍÕúÎØúÔÜúÙàúÛáúÛáúÚäúÙÝúÒßúÉÖúÃÕø»Ìó¶Éé¯Àç«½à©·Ö ²Í­ÅªÁ¤Á£Á£À¤ÈªÊ¦Î«Õ°Ø£²Û ®Ù¦µÝ§´á¨¶ã®¸á¬¸ã¬·Ý¬·Ü©¸Ü¦·×£µÓ¡·Ó³Ê²È³Ä±Ç ³Ç°Å®Æ¯¾¬Á®Å¨»©¹§»¥¿£Á¦Ä£Ç§Ë§ÌªËªÑ¬ÎªË«Í®Ì¬Ì«Ì¡ªÍ®Î¡«Ê¬Ç«Ä¦Ã¥¸ ½¡»¡Á»¢¾¡À¥¾¡½¤» ¹¸µ®« ~qz_|lQt`Mr[Fl`DkQBfQDdQDfOBbO?`OD`KB`WBdQ?dWFfO5`OBgQBdWDfS=dS?fODfQFfUFiY?g[FfUIi[IngKq`FqgUxw]|qzngfwbzfz_t`~fdb{]n_f~]nY{nOzdOrgQ{dYrtSzx]~u[zgz|¤·ª¸½­¾Á¬Á¾¬ÃÀ³ÆÀ²ÄÁ¯ÃÀ³ÇÁ­ÃÁ°ÃÁ®È¿±ÄÁ±Ã¾±ÄÁ²Ä¿®ÄÀ­ÂÀ¯ÄÀ­Ã»­À¿¯Æ¾¬ÃÀ®Ã¾­Å¾­Á¾±ÄÁ¯Ã¾®Ã½¬Ã¾¬Â¿¨Ä½°ÃÁ¯Ã¿­Ã¾±Á¾¬Á¾¬Â»«¿»«À½¬Á»©Ã¼¬¿·¨Â½«Á»©À¼©Âº«¿»ªÁºªÀ¼ªÂº§¼·«½·¬À¹¦¾¸«¾¹ª¾¶¨À»«¾ºª¿¸ª¾»«À»¬¿¸«Á¸©¿»«¾·¨¿¶ª¾»«¾½§¾»¬¿¹¨¾»§»º­Â·§»¶«¾¹¬¿¸«¾»ª½¹©¾·¨¾·ª¼¸§Àµ§¼·¨¾»ªÀ·ª½³©¼·¨º¸¨¾·«¼¸§¾·©¿¸©½¸ª»·¦»¶ª½·¦»·©½¶©¼·¨¼¶©¾³©½¶¨¼µ¥»·«À³¦¸¹ª»µ¨¼¸§¾¸«¸·ª»·¥¼¶¦º¸¬¾·§¿·¬»·§¾·¥¾µ©»´§»º§¹µ¦º³ª»±¥»·¥»³§½µ¦º´¨º´¨»·¥»³¦»µ¡º¶©¼´¦ºµ¥º¶¦ºµ¦»³¥·µ¨¸·¥»¶¦¹µ¥¸²¥¸³£¸´¨»²¦½µ¥º±¥¹³¤»³£·³£¶³£·²£¸³¡·²£·³¥·³£´²¡»´¦º±¦¸°¤¸³¤¸°¤·²¢¸³¦¶³¢¹°¢µ¯¢³²£·²£·°¡·®¤³²¢»¯¢¸³¢µ°£·²£¸±´®¡¹¯¡µ±¦¶°¡·®¥¸°¡µ´¥¶®¡µ­µ¯¢·®³¯ ´±·°£µ­ ¶²¡·­¥µ°¡³®¥´² ³«µ¬¡³¯¤·ª ­®£³­³¯£³­²² ³¯¢³±¡³° ³¯²µ¢±­¡®¯³³¢±¯ ³²¡®¯²± ³±¤³± µ® ±±µ±¥²´ ¶³¡´°¦´³¤¶² ±®¡´²¡²³§³³¢³²£³³¥²°¢·± ¯³¢³²£¶´¥³±¤µ¯¢·µ£´±¥¶³¡³³ ³³¨¶²§±± ¹°¤µ³¢³³¥·µ¥³³¡¶µ§³´¦¶µ¥³²¡¶´¡±²¦¶³¤·´¤·µ¥¹³¤·³¢³µ¡·µ¦µµ¥·µ£´·¥¶¶¤··¤¹³£º·§·µ¥··§¸µ¤º¸¡··ªº´ª¼·¤·µ§º¶¥¹¹¦··©º´§¸·§½µ«»º¦··¤»·§¹¶§»µ¥·¹¦¸¶§¶¶¨¶·¦»´¦¹µ¨¹¸ª½·¨»º¨ºµ¨»¶ª»³©¹¶¦º¸©»·©ºµ¨»·©»»©¼»§¼ºª»¹¦»¸©»¸¨¼ºª¾¹¦º¸©¹º«º·©¾»¬º¸¬¾¼¬½ºª»º¨¼¹ª»»©¾ºª¾»§»¾¬À»ª¼º¬»»¨»ºª¼¶¬»»¨¿ºª»¼¬¾¼©¼¹¬¾»¬¿»¬¼¸«¾¹¨¾¹©¾»°¿»«¿»ª»¹¨¼º¬Á¾©Á»«»¼®¼º¬¾¾©¿¾©¿»®¾½¬¼¾²½»­¿¼©½¹­Á»¬¾»¨¾»­¾¾ª¾¾¬¿»ª¾º§¹µ¡´±­ª¨¢||urizduW{|]zx_x{d|fz~`{r]{zbb{{fwigin~igz_wnYtbSriMo]Mb[Mi[If]M`YKfYK`[M`[Kd`Mg[M`]Id`SkdKfdMg`Ik[KfbK`[K`]Ff_Ki[KbdIlgIfbInfKokOlnSnxQnfQkbOnubtl¡z¶Ã Ã¥Ì§Î¬Î¯Ó¢¬Ö¢®Ö¦°Ø§®Ù¦®Ø£­Õ¦®Î°Ê©Ë¬ÃªÁ¥¾§Ä¨Å¬°«ÂkiÑXwÍ`ÃsÅ¬¡Ú¨±¿|bÔSÀwÊ¢­²«ÅpmÑZ{ÍeÉwÍ²¦â©²µ¾qÖZÑµ¥â«¶Þª³Ü§±Ø¢°Õ¢¬Ó¢±Õ °Ý¬¶ä³ºñ»ÃöÅÈúÉÐúÐÒúØÜúÛàúÞáúßåúåèúâäúàäúÙàúÐÜúÉÖúÁÎö¾Êó´Âî³¿ã¬µÙ¥°Ò­Î«È¤Æ¦Ì§Ì¤Õ­Ù¤¯ß§±ß¨³ã¬·ä«µå­µâ­·â¬µâ¬µäª´Ü§¶Ö³Ï¢³Í¢³Ò£³Õ£³×§³Ó¨®¿}¿³à¦µà¨·Ý©³Ñ§©¾yº¬Ì¨Á¨½¥¹¢«}²l¦¡Â¤­jÇXeÊT|Âe¯«Ë¬Ð¬Ð ¨Ð©Ë¨Î§Í£¨Ì§É¨Ê§É¨Á¨Á Á¤Â£Å¢Æ£Æ£¦Æ¢Å¡Á¢Â¢¾½µ´§zk~u`uk[ndUgiOn]OfWO_[O`[K_]Mb]O_[M_]Id[M`]Qi[I``Kb]Md]Qg]Of_Od]Id`KfbOl[MfdOg_OliOklSokUon]tzix{tn~fnnwiqnqn|iul{`~t[xo]wn]wo_uz_wd{z`~o{ ·©¶¼®»Ã²¿ÄµÆÃ³ÃÄ±ÆÇµÃÆ·ÆÈ´ÅÆ³ÄÆµÈÇ³ÃÅ±ÅÃ³ÅÅ¶ÅÆ·ÆÃ³ÈÆ²ÁÆ¶ÇÄ¶ÄÃ³ÅÄ´ÃÃµÃÆ²ÃÆ³¿Â²ÃÃ³ÄÁ³ÅÁ³ÆÅ³ÄÃ±ÃÁ³¿¿´ÆÃ²ÁÃ´ÃÁ·ÆÁ°¿À®Ã¿³¿Á¯À¿³ÃÂ²¾¾®Â¿®¾À®ÀÀ®Ã¾¯Á¾²Á½®Á¿¬ÂÂ°Á¾¯¾¼³¾Á«¾½­ÁÀ°¾½®¼¿²¿Á²¿À³À¾®¿Á¯½¾¯Á¿®ÁÁ¯À¼®À¼­Á¾³¿¼¬¾¼°À¾¯»½°½½­Á»®½Á°¼¿®Á¹®À¾­¼¿®¾¾¯Á½®¼»¬À¼°¾¾­¾»¬ºº­½¼­¿½®½»­»»±½¼¯¾½®Á¿­»»¬»¼®¿¾­¿¼±»»¬»¼¯»»¬½»¬»½«½¾¨º¾¬¼¼®¼¹¬¼¾¯À¹¬»¼ªÀ»®»½¬»½¬¾º¯»¼­»¼¬»»®¼»­¹»¬À¾²¼º³»»¯¹¹¨»»®»º¬»»ª»»­½»¬º»¬»¹­»º¬»»ª¹º¬»·¬»·ª¹º«¹·¬»¾­¼¹«º¸¬¾¼¬º»§»¸§ºµ¨»¹«¹·ª¸·«»·¨»¶«º·ªº·ª¸¸¬»¸«··¨¹¶¨¸¶ª»¹«º¹§¶µ¦»º§¶·«º·¬ºº¨¹·¨·¸¬··ª¶´¬¸¶©»º§µ·§·´¨¶·¨··¨¶µªº²¨¸¸¨··¨¹´¬¹·©¸µ§¸´¨´³©³´¨·³¨¹´©µ´¢µµ¤³µ¨¶·£³³¥µ´¡·µ§ºµ¥¶¶¥¶·«·µ¬µ³©´·¤·³¦³³¦¶²¥´´ªµ¤®ª¯©¯«³©³¬±¬³«°°²ª´©³ª°©±©²¬¶«²ª¡²«±¬°®·¬±«¢³ª³¦²¬³ª±®µ­´­¡³®´«´«´«´¬³­³«´®²¬ ·­³®µ­°®·¬´¬·®µ¬°¬µ¬ ´®³¯´¬ ³®¡¸¬µ­´®µ­¡µ°¡µ±µ¬ ³°´°·¯ ·®¡¹® ¶°¢·®µ­¤³°·±¶°¡·­¡¹²¤µ°·²·²¢¶¯¡»±£·±¢¸°¡¶±¸³£·±·¯¢º®¸°¤º²£¸±¥»°¢¹¯¡¹³·²£·±»®¢·­ ·±¡º³¥»³¡¹±¦·³¡»²¥º²¤º³¡¸µ¤»²¢»³£¹´¢¼³¤¼´¤»³¢º³¤¼°¡»´£»³¥½µ¢¼²¤»·¥º³¡º³ ¾µ£»¶¥»³£º´£»µ£½µ¤»´¤º¶¢»µ¤¸´¢ºµ§¾¶¦»µ¥ºµ¦¼³¥½µ¥½³¦¹¶¥½³£»µ¨¼³¤¾º¨¼¶¥¾µ¥½¸£¼²¨¼´¤½³£»¸¦»·§¾¶¦½·£¹·§½µ¤½´¥¾µ§¾¹§¼¸¦½¸¥¿·¤½·§¿·§¾¶£¿¸¤¾¶§»¶¥»·¥¿¶©½·§¿»¥º¶¦¸®³¬¬¢z{{rrn|dz_nWnS|uU~q[u]t]{nY|gY|r]~t]{rU~n_|x]u`zxgdu]|nUwiQu`OnSDnWBiOD_OIkQ?bO?fII`M?`QBfQBdU?bQBiMBiWFgYDgQIiQ?bK:dQ?bM?dWDfQBgOFlYBdUDi]Bk_IngOqkIoYDobFrq[zgx°Ã Ã¡Ä©Â©È©Ì©Ì­Ï¬Í«Ë«È¨Å§Á§¹¡»¦½§Ç¤Ì©Ì§Î«¹Bä6"ñö/î&×µ¯SàE-î%=ç3-í#NÝ@·Bß9 ïõ,ê&Ñ­|Ìf"ñ1í'%ò¹»Ý£³Ú¤·×²Ó ±Ó°Ð²Û¦·á¯»íºÂõ¿ÆúÇÒúÌÕúÖÝúÚÝúÞæúàåúâèúâåúÛåöÙÝúÏÛúÈÔúÂÎõ¹Æð³Äé¬¾Ü§ºØ ²Ï®È§ÈªÇ§Ì©Ò¬Ö°Ù£²Ü¦³Ù§µá¨¸á§¶à§´Ù¤³Ø¡µÒ³Ê³Æ°Ç­Ó´Ù¡¹â¤¹ä«¾å®»hÛVøÁ½Ý·¸á²·Ý°µgÛS÷¶³Ð¢¬Î§Ê§Æ¤TÉHóª=Õ7 ëí8ß0²tÆ¥Å¥Ä¦Ç¢Ê©ÉªÇ©È¦Å¤Ä¤Á£»¢Á¢¿¾¦Á¤Ã¥Æ¢Á¦¾¡Ã¢½£»µ´¯§x{dlW{`SqWQiWFlUBbODdQ?gDD_KFbQ?`ODfUFdS?dUDgOBg_FgYIgQDgQFgYDfUDkYDdUFfYDkU?fOId]KobDnbMtdUwu]{k{|ro|f|bw_r_|ggknwd{fzbnU|f[{dOw_QqlWtnYxwYxnYoflx§¦¯º¬½¿­À¼®Â¾±Ã¾°ÁÃ¯Â½®ÃÀ°ÄÂ¯Å¿±Ã¾®Ã¾®ÅÁªÆ¼®ÃÀ®ÃÀ­Ã½°Æ¼°ÂÀ±ÆÂ°Ä½®À»²Ã¾­Ä¾­Ã¾°ÄÁ­Â½®ÃÀ®Ã»­Á¼¬Æ¿®À¾°Ã»­À¾«¿»¬Â»­Á»¬¿¸­¾¹®À¾­À»«Á¸¬Ãºª¿º¬¿º©¿¸¨¾º¦¾»«¿»¬»»ª¾º¬½º«¾¹§¾¶ª½¹«¿»¬¿ºªÀ¹ª¾¸«¾¸«Áº«Àºª½·ªÀ·©¿»§½´ª¾¹¬¾¸ª¾¹ª½»©Á¸©½·¬»¸¨¿·§¾·«½·«Á»¦Àº¬½¹§½·ª¾¹¨»·«»·¨¼·ª¿·©¾¶¨»·©»·©½¶©À¸§½³¦½¶«»¶¨»µ©»µ¨¼·©»µ§»·©¾³¥»¸ª»³©º¶¦¼µ¦¼·¨½³§º·«º³«¼¶§»·ª½µ§»·ª¾·¦½¶©»¶¦»µ¤»·¨»¹©»¹«»³¥»·§»·©»µ§»µ«»¸§º¸¥»µ¨»²§»µ©»´¥º´¥»¶¤¹²¥»²¦¸µ¥¼µ§º²¨»³§¸²§¸²¨¸²¤¹³¥¹·¥º²§³³§·°¦º³¢¸´¤µ°¥¹³§·µ§»²¥¹´¦·¯£·±¤µ¯¥·´£¶³¢¶µ¨¸°¡·³¥·°£¸³¥µ°¦·²§¸±£µ²¢¸²¡·³£·±¦·²¡·²£¹±£·°¢·²¤µ±¤µ­¢·±¥¶°§¸¬£µ°£µ°¡³­¡³¯¡·°¤µ¯¢·® ´® µ¯£´¬ ·® ´® ¸®¡·­³®¢³¬ ¶®¤µ® ·®¡¶­¡³¯²¦¨®³®³¯µ±¡³°¤³° ´¯ ·±¡³¯ ³°¡³³ ²³¡²´ ±±¤³­¥±®¡²¯³³¥´±¤¶°¡±°£´³ ´± ±²¢¶³¢±³ ³¯£·³¡³°¤³®¡´°¤³²¡¹®¡µ¶¤·°¤¶¯£µ³£¶±£µ´ ·°¥µ²¤·²¦³±·®¶´¡³³¤´±¨´±¤·³¥¶´¤·µ¤¶°£·³¢¸³·³§¹³¥µ³¥µ±£·²¢´µ£·³§µ³§¸³£·µ£·µ¥·±¥·´¥ºµ¦»³¦·µ¦¸·§º³£¶¹¨¸µ¨¹³¨¹¹¦¹·§»µª·µ¥·¸§¸·§»¶¤¹´¦¹³¦¼·§¹º©¼·§º³¡½µ¥¹´©ºº¦»·¨¹µ«ºµ¨·µ¥»¸ª»·¦¼·ª½¸§»¸¦¿µ§º¸ª¾¶§»µ¨¼¹§¾·©¼·§½º«½¶ª¾º«»¸§»¶©¼»«¼·¬¾ºª»¸¦¾¼¨¿¸©½·¨¼º©½¹¬¾»©¾»¨»º¨¾¸­¿¹©»¹§»µ¨¾·«¼¸©¿µ¤º¸©¾¹¨¾¹¬½·¬¼¹¦»¹¬Á»¬¿º¨¼»©»»©¼»¬½»¬½¹«¿º¬¼¹«¼»¬¾¸«¿¹¬¾»©¿¹¦¿¸¬Àº¬¿¾¬À¿¬½»¦½¼ª¾»®Á¿¬À½­Á»­Á¾­Á»©¾º«¿¾¬¾Á¬Á»¬¼¶©»³¤³°­ r|{rzgt]r]{{`zzf|g{f|uY{rb~di{dzf|zbfgk{`|nYzoYtgSn_SnbQf[OdYQi_BbUK`UO`WM`UMgYMb[K`WKb[Kd`KfdOgYOiWKd[F`YMgSFg_Dg_Mf[Ml]OibOnkSolMotUolUq_MriUn~f{o¥·Æ¢Æ¡Ã§È¨È¨Í©Ì¥Ï©Ê§Ê¦Â¤¹¤¼ Ç¡Ì¦Î¨Ò ¢Ê¥©É¨¥Æ¦¢Å¢¦º¬a×Rü³ÁÂÀ$óÔiÃ½Òg#òÆ¿Û°¯jÔYü³¬¼v"ð£¾Ö°¬eÜR(ñ Èµã©ºá¨´Û¦¶Û¨µÛ«¶Þª·å³¾ó¾ÁùÅÉúÎÓúÓÚúÝßúáãúæèúèèúëíúèéºè¬dòZ¸ã£úÎ×úÆÓôÃÉ¤ÑnÝWÆ|Ö¨§Ô¯Ê¨Ì¬Ì¨Ð©×¤°Ü¥°Þ«·â­¶å®¹ä®¸ç¨µá¬·Û¢´Î³Æ®Ð³Ü¢¹â¬»ç³¼ì·¾è·»è³»£Ëýú
À¾ÜµµÖ¶²Èýù©²Ê£§Ê¥Ë¡¤¹vý÷£¯!è6Ù1]ÃP¢~¾ÀÃ¥Æ¦È¥ÉªÍ§Ê­Ê¨ËªÉ¦Ç¥Â¥Å£Ã¥Æ ¢Ç¡§Ë ¥Ë ¦Ê¢ªÈ¤Æ¥Å¦Â£¼¹ ´­|lx`{l]ubYndUl_Mi[Fi[IgSMdYQdWF`YMdYOfWKb]Qg]MgdQgdOifKkdSngQniSolKfbQo_MkbMn_OliUqnMkgUwlbrb|u||znii{f|nluq|ikdzb{k]|qUunSxkWwu]ww`zz[unw¢¨¬¾­ºÃ±¿Ä´ÄÄ´ÅÃ³ÆÆ³ÅÅ¶ÆÅµÅÃ³ÃÃ·ÃÅ³ÆÂ³ÃÄ²ÅÇ¹ÆÃ±ÁÃ¶Ã¿³ÃÄ²ÄÆ¶ÃÃ²ÆÄ´ÂÂ²ÅÃ±ÆÂµÃÁ³ÇÆ³ÂÃ¶ÄÀ¶ÁÀ±ÂÃ±ÅÂ²ÃÁ³ÆÁ²ÃÂ¯ÂÃ±Ä½­ÂÀ®ÁÀ°À¿°À¿±Ã¾­¿¾®À¿¬Â½²À»­ÀÁ¯¿À²Ã½°À½°Â¼¯Å»®¾¼¯Á½®Á½±Â¾¯Â»±Á½¯À¾¯À¾°Á¾®¾º®¾¾®¿¾³¾¼¬¿¾¯½½²Á¿°Á¾®¿¾°¾¿±Â¼¬À¼¯À»°½»¬º¼®¿¹­¾¼®¾¾¬¿À¯¿¼¬¾¿¬¾»¯¼¾¯½»¬À¾¬¾¹¬¼¼¬Á¹®»»¬¾½­¿»«¼¾­»»¬¾»­¿º°¾»¬¿¸¬¾¸­¾»¬»¾¬»¹¯¿·¬½¸­»¾®¼»ªÀ¼«¾¼®»¹¬º¼¯½»­¿»¯½»ª¾º®À»±¾»®»º¬¼»¬Á»¯¾·­¾º¬¼»°¼½¬»»¬¸·¬¼¼«»º®¹ºª»·¬»¸¬¹¹ª»·¬»¸ª»·¨»»¬»ºªº·¬¹º«º»®¾¸¬»¹¦»·¬»¹¬¾·ª¹¶¬·¸©º¶¨¹¸«º·©»¸©º¸¬»¶¬»µ©¶´©»´©º·«¼·¦¼¸¦·¹¨¹µª¹¶ª¸µ¬¸º¨¹¸¬»¶¨¹¸§·¶¬¹·©·µ¨µµª¶µ¬µ·©»µ¨µ³¨··¤¹µ¬¶³ª¶³ªµµ¨·¶©·´¥¶³¨µµ¤·µ«·¶¦¶³ª·µ¨¶·¤·´¤³³¥·µ§·¶§¶±¦´³£¶³¨·µ©·¶¦µ³¥´³¬º°¤´±§· ªª°¬««²®®§±©³«°ª±¬´«±¬³¬³«±©±® ³ª²¬³«³ª³ª´­°¬²¬³ª³«³«²­²« ³°³¬±®°«µ®´¯·­²®µ­ ³¦¯®µ®¡²¬´¬³­µ¬µ¯·­¡¹®¢µ²¶¯¶®¶°¡µ®·¯³®¡µ® ´¬·¬£µ®·®¶¯·®·®¡¶®·°´° ²­ µ­¡¶²³°£¶°¸´¡·³£º¯·°¡¶­¥¸³¡¹´·¯¤º´£·² ¹²¡·² ¹³¢¶²¢º²£º² ¸µ£·³£¸³£¸³¥¸²»³¡º³£¸±¢»¶¦¸³£¸°¦»¸£·²¥·²¥»µ¤¸²··¤¸³¢¸µ¦»³¤º¶¤»µ¤»²¤»¶¤»µ¡»³§¾³¦»³£¹·¥¼µ¥¼¶£»´¦»¶¢»µ¤»µ¤»¶§¼µ¡¼µ¤¾³¦¹¶¡º¶§»µ©¼·¢¹·£¹²¤½³¥»¶£º³¥¸´¦»³§»µ¦¼·¤¾¸¥¾³©½·§¿·¦º·¥¾µ¥»µ¡¾¸ª½¶¦¾¶«¾µ¦»²§»¶¦¾µ¥¼·¦»¶§¾¹¤¾º©¼·¨½º¦½·¥¾¶¨¾·¨¼¹©¼¸¤¾¹©¾º¦¾³¥½º¨»·£·­®¢§z|zrlqbxY|kWxkW|uYr]|z`wY{rU|oY{_x_q_~z]|z`~x_|d]rW~lUt_In[KlUIkWBgQBgUDdWFdS?`KBdOD`Q?bSBfOB`QD`MBdYBg[FfUDlQBdQ8dQ?fQBdWDi]B`Y?iYIn_Bl`FndKkqKqbKoYKniMqxY|lx²¾¡Ä¤¿¤Ã¥Ç¦Å§Æ¥Å£Â³¡²¾ÃÄ¡Á½¸®«ª¤ðñuºh´aÐQöûöiÔVÝ­³Ë¶¢ô ô¾vÁm(ë#µ­Ù¤´g×Uù
±ºß¤·Û¦´Ú§³Ô¢±Õ¤´Û¦·ä²½í»ÄúÂÇúËÒúÒ×úÙàúÝåúâæúåèúäèï-ù(Cõ>+÷(ã|öÆÏ_çO2ñ(@ê5-î$KÝ@ÈªÌªÈ©É«ÐªÕ¯Ø¤²Ü¢²Ü©·ß£¶Ý¤·Û£·Ó²Ë³Ç°ÒµÛ¦¶ç®¼äµ¼æ·ºã°»Ø¬¶Â²¢
ú
>á5ö£®¾£¥¢ù
6Ü2ô¦®¢ø	9Ü0õ¢­#èì%ã"îu³d¸¾ ¾ Ä£Ä¤Æ§È¥Ä§Å¤Á£Á¦Å¥À¤Á¡Ä¦Ä¥Æ¨É¥Ç§É§È¦Á¤½¡º µ²¨|kwYiQr`Sn]MkYMiUIfOF`KDdMF`SD]QD`O?fUB`QDbQFi`Fo`OnlQwrStwSrrWrrQtfIk]Fo]Fg`MofSofIudQokUxwd|kqtwqn~gdt`~u`|gwk~ibzd|uY{k[zoSwdOrfOtiWnlWwwW{q`zg{¤§µ¬·¾°ÀÀ­ÂÁ±ÁÁ¯ÃÁ¯Ã¿³ÄÃ²ÃÃ°ÄÁ±Æ¿°ÃÃ²ÆÂ±Ã¾®ÃÃ°ÁÁ±ÆÁ±ÃÀ°Ã¿¬ÃÁ®Â¿®ÅÁ¬Ä¼®ÃÁ¯ÅÁ³Â¿°Ã¼­Á½°Ã¿°Ä¿­ÆÀ°½½®Ã»­Á¼®Â»°Â¼«¾¾¬Ã»©Áº¬¿»­Á»¨Á½¬À¶¬¿½¬¿»¬Á¹«¿½¬¾»­À»¨¿¼ª»¸¬¾ºªÂº«¿·ª»·©¾º©Á»¬¿º¬Á¹©¿»¬Á¹ª¿º«Á»¨¾·©¿¼«½»ªÁ¼¬¾º«À»ª¿¸®Á¸©À¸©½»ª¾·ªº·ª¿»«½¹©½¸ª¾¸«¾¸¨¼·ª½·¥¼º¬¼´«¼¶©¿µª¾¹©¼·«À¸§»´©À¸¬»·¬»¶¬¼º¦»´¥¾¶ª½·§»·¨¾¶¥¼·§»·§½¸©½µ§º¶§½¶«»¸ª¿¹ª¹¶©»·©»·©¼·¥¾¸©¾¸©»º©½·¥¾¸ª¼·ª¾µ©¼·§»¸«»·ª»´«··ªºµ©¾·§¸µ§»µ¦»µ§»·§»µ§»µ©º³¦·³©ºµ¦»³©·µ§»´¦¸³§º³¢¹±¥º²§·´¥»³£¹µ¨»¶£»±¤·´¡¸´¦¹²§¹±¢¸¯§·²£·±§¸µ¦»²§·³¤·´§·±©»¯¤»³§µ®¥µ³¤¹µ¤µ³¥·±¦¸² ¶µ¢·±¢·°¢µ±¥¸®¥¶²¤·³¡·°¥·³¢¹²¥¶®¥·¯¤·°¢·®¥¸²¡³°¡³¯¢³°£¸­¡µ²¡¶°£³²¡³°¶° ²± ²±´­ ¶® ´¬£µ­ ²­¢³°´¯¡µ±¤´¨¡¬­¢´®£°® ¯®²¬´±¦³­¤±±µ­¢µ±£³³¯¯£´¯¦´¯¡¯±¢¶®¤³´²±¡³³ ¶® ´°£´®¥´²¤°®£³¯¤·­°³¡³®£¸³£³²£³³£³°¸³¢³³£·±¦³­ ³µ¤·³¤·±¢³³¡µ±¢µ¯ ´²¢·³¤´¶¤¹´¤µ´¥µµ ·´£µ²§·±¦·±£¸´¤¶²¨·±¦³³¡µ³§·³¦µ±£¶³¦·¶£·´¡·³¢µ³¢³²¥²·¤·³¥¶¶¤·³¦¶·§¹µ¢¶·¤·µ§·µ¥¸³¨¹¶¥¸¶¤·µ¨ºµ¦¹¶¤·¶ª»·§»¹ª¶·¥¾´¨»¶§ºµ¨¸·©ºº¦¸·¨»¶ª¹·§¸¶§··©º·§½¹¥º¹¬ºº©»¹¬¾¹¨»¶ª¿º©»¹¤¼µ©½¹ª¼»¨¿·¨¹¹§º¹©¾·ª¼º¥¼º¬¼¹¬¾·«¼·¬»¶¨½¸¤¾»ª¼¶§¾º¨½º«½¹©¼¸¨»»¬¼ºª¾µ§»·©¼¹©¿¹ª»»«¾»­¾¸«¾¹¨¼¹«½·¨¸º¬½º®¾¹¬¾»ª¿·ª»º¬¾º¯Ã¹¬¾º¨½·¨¼¿¬»»©¿»ª¾¼¬¾»¬¿º¨¾½ª¹º«À»¬Á¾¬Á½­À¹¨½¿¬À»¬»¼­Á¼®Àº¬Á¾­Â¾­À¾¬½»¬¿»¬¼´¡µ¯¯¥¢~{¢ztrixbq]xt[zz`~ubzd|z`|x_{ubzixf~ufb|`|iidz`{n[ukWqbSk]Ok]Kg]Mf`Kd[MdWK`YKdUF`YMd]Mg]IgWIdYDk`OfgOg`Ki[KdYDiWIdYOd_Kg_Kb]Kk]MndSlnQrkWnrOndQobSrw`tb~u¢¸Å¢Æ¤È¦È«È¥É§Ç©¿ ¶³¼¾º´±§{xwzjoQ«Oéus7Ò5ê,ä& ëBß7Ì¨¦Ì²¥»¹Ðn'ñ³µLÜ@2æ-aÔS÷ôÌµ¦å­¸àª·á¨·Û¬¶Ü©¶ß¨¹ç³½ò»ÆúÆÊúÎÓúÖÙúáàúääúèëúèëÖïËQøL¼í°ðãß¥å*ø%©Þ)õ"ÛtÍ¿¤Ðm"ð±¬Ð¬Ì©Ê©Õ¢±Ý¥³à§´á¤µæ¬¶á¡¶à¤·Û¡·Ð´Ð£µÚ¢¶æ­»é±ºç¹»æ°·ã°¶Ø®³Î£¬-è'ñQËI÷
k¬b#á îAÀC
ö	_§Z}#á ïMÈD÷	s´b¨p]ÆL ~¥v¯eî¨t¾ÀÃ¤Æ¦È£Ì¨É©È¨Æ§Å§Ê¬É§È¤Ì¢ªË¤«Ï¥¬Ì¢¬Ë¥¬Ê¡ªÊ¡§Æ¦Â¤¼ º¸²¤u~dq[ud[ogOo`Qi_QkWKbUMfWOb]K]YObWIfWMg]Qd[OnrYrfzi~izg{bzdxUqbSr_KkfWkq[wiSrlQqk_x{iiorxtqnn{g{`nurg|n~f|{bl]|w`~l_xiStoYtq]zxg|kk¢¢±ª´Â³¿Æ±ÃÅµÆÂ³ÆÁ®ÂÆµÇÃ´ÅÅ³ÂÆ³ÇÄµÄÆ³ÄÁ´ÇÆµÅÃ³ÅÃ²ÆÅ·ÅÁ³ÃÅ³ÅÁ±ÃÃ´ÃÂ±ÆÁ³ÅÅ³ÆÃ³ÄÃ³ÂÁ°ÁÁ³ÂÂ²ÅÁ°ÃÃ³ÃÁ°Ã¿­ÁÂ±Á¿´ÀÀ±ÃÀ°Á¿´ÃÀ­À¼®Á¾¬Â¿¯Á¿¬ÅÀ±À¿¯Á¾¯ÀÁ­ÁÀ¯Ã½­¾¾¬¿»¯À¼­À»®¾À¯Ã¾¯À¾®Á»°Á¼±¾À­¿½°¿½²Â¿®À¾¯Á½¯¾½°Â¿¬À½°¾»¬¿»¬»¾±¾»®¿»®¿¼¬¾º°Â¾³Á½¯¾»¯¼½®¼À­À»¯¿º®À¼¬½½­¿»°Áº¬¾»®½¾¯¼¹®¾»¯¿¼²Á½¬¾¸ª½»¬¼¾¨»º­¿»¬¾¾©¿»®¼»­Âº¬½·¬¾»®½¹¬¾º¬º¹¬½»¬À½®½º«¼º¬¼¾¯½»®»¼­¾¹¬»¼¯¾¸®½»­¾º®¾»°¾¿¬¿¹­½½¬»¸­¾½®»»©¼½¬¶·ª½¸¬½¼¬½¸¬¹¹¬¼¸¬»»ªº¸«¹¸©¾¶¬·¹«ºº©¹º©»¸¬»¶ª½¸«¸¹¬ºº¬»¶«¸º¥»¸«»·ª»¹©»´¬¼¶¨º¹¬¶´«º´¤º·¨·³§½¶ª¹·©»·¬¹µ¥·µ§¸´¨·¶¥º·©¸³ª¹²§³´«·´¥º³¥·³¨¶¸¨·µ¬¹·§·´©´µ¥¹·§··ª·³©¶¶¨¹¶§·³¨µ²¤µµ¥µ³«¶³¦¶²¨¶³¦¶´¨¸¶¦³³¤¶±¨¶³§³´£µ²¤²³£µ´¥µ²§µ³¥´³¥¶±¦³³¥·¡ª©®§«¬²ª °ª³¬±¬´­³¨««°ª²­²ª°«°«¯ª³¬²¬°¯²¬³«¯«°©³°²«±«¶§¯©±«¯«³«²¬ ±­µ¬³¬ ³¬µ¯²­¶±²¬¡´® ´«³°±ª²¬ ³¬²²¶¯³²³®¡µ®¢´­·°´¬´°´®¶°£¶¬ µ±·¯¡´®´°³±´¬¡·®·¯ ·­ ¶´ ´°´®µ³£·² µ¯¡¶¯·²¸²£·²£¸²¡¸°¡µ± ¹³º³·²¢·³¢¹®¡·³¡¸³£¹±¡¶³£º³§¹²£¹±¹µ º° ¸´£·±¥¹´£¸³§ºµ£·³¥»·¨½¶£»µ£»²£¼´¡»°¢¹µ¥¹³§»´¤¸³¥¸·£½³£¸³¥¹µ¤º³¦º³¡»´¡»µ§¹³¨¾¶£»·¤»´¥½µ£»µ¤»¶¤¼´¤¼·¦¾³¢»µ£¸³¥º¶£»·©»µ¤»µ£½µ ¾·¦ºº¤¸¶¥½·¨½·§¾·§»¸¤¼¸¦¼µ¨¼·£¼µ¥¼µ¤½¶§º¸¢»·¡¼·©Á·«»¹¥¼·£¾¸¨½·¥¼¸¨½·§¾·©¼º§¾¸¦»¸ª»¸§¼µ¥½¸§¾·§»·£»³ ±ª©rwtgiw[qUoUzlUxnWzqYzr`{x]~kW|nYzz[q[zr]w[zr_~qb|]z_~rYwgQt`Fn]DgYIkSFgYBfWFdMBbO?`Q?dM?_S?iUBbMFgQ?`F?`U?i[Dib?dQ?fO8dK?bQDdW?g]DdY?kW?n[KidIniMlgDn`Fn`QqqYwd{n°»¡¿¤Â£ÃÁ£½·³©±²ª wrnlzgforzipwnY|gWairÝ+Ç4àj~~nz~åUÃP¾¥Î«¿¨.ë%ÀuÕ¯jÉY%ìKØA/ì'Ë©¨à§¸â§µÛ£¶Ü¢´Ù£´×¥·à®ºî·ÁöÁÆúÈÏúÏÚúØÜúÝâúåêúæèøéìÚèÌîäßúÝägî\?ó9ìÈÉ~ßgø
û÷iÏXÊªÈ§Æ¨Ï®Ö¡°Ø²Ý¢¶à£¹ß¥¹Ü¡´Û¸Ò¶ÎµÛ·Ü¥·á§·àªµÙ§²Õ°Î«»¨©zìó
õ
ýÜF¬Nçðô	ýØU\Z\çò	õ	þ!ài¦^~¥§"äp²c·¾¿¥Ä¦Å£Æ§Æ£È§Ä¨È§Ç¦Ê§Ì ¨Ê§È¬Ì¬Ì¥¬ÍªË«ËªÅ£¾¾¢º³¬nzb|gWq]Qo`So]Kg_DgQD`QD`KD]Q?`UD]MB`Q?fYIloYx`kog`W~]w{KwbItYKq`MlnQqbKrdMwfQon`{b~inglbtd|b_t[{xdnk|_t[u]rYo_{tWzkMx_MrgOtfUurYzx_zgn¢ª¬»­¹¼­¾Á²¿Á¯ÄÂ²Ã¿«Æ¿¬Â¾¯ÃÀ°ÆÀ®ÅÁ²ÅÁ°ÄÁ­Ä¾®ÄÄ°Ã¿®ÃÀ®Á¿°ÂÀ¬ÁÀ®Á¼®Ä¼¬ÀÀ±ÃÀ®ÀÁ­Âº«Á¾®Ã½¯Á»ª¾º«Á¾ªÁº«Á¼ªÁ»¬¿º­Ã»¬¿¸«Á»«À»©À»«½»«Á¹«Á¾«Àºª½»©Àº¬½½©½º©½ºªÀ»¨¾»§¾·©»º§½·§¾¼®¾¼¥¾¹¬¾º¬½»¬À»­¿¸¬À¶©¾»¨¾¹ª¾¸©½¶ª½»¬¿¸«À·¦½º«¾¹«½·ª»»¬À·«¾»§»½«»·ª¿·§º»«¼¹¬¾·¨½¶©¾·ª½¸¥¾µ©¼·§»·§½µ©¾¹©¹º§»¸¦½¹§»·§¾¸£º·¬»¸¦¾·¦»µª½¸ª¼·¨»·§¾·¥½·§º·¦ºµ¨¸·§¸µ©¼·©»¸¦¹µ¦½µ©¼·§¹·©»·¨»¸©½¹©½·©¼³¥»»¨»·¥¹·§¸·¦»·ª»´¨¸µ£º³¤¹¶¨»·¨»²©·´§¹µ¥¸µ§º´ª¹µ¤»³¨¸·¥»²¦»µ¥¸´§¸´¥»´¥º³§¸³¤º´§·²£·³£·´¤·´§¶³£·²¥¶°¢µ²¡¸²¦´³¤³°¥¹±¢´³¢´³¥¸³¢¶°£·± ·®µ²£¶®¢·®£µ²£³²©¸±¥·±¡·±£·²£³²¢³°£¸± ¸¯¥µ±¢´­·® ³°£·°£³´³®¡³°£·°¢·² ·­ ¶®¡¶°¡³¬¡³­¡°° µ­´¬¡³¬¢³®¡²®£²° ²¯²°´¥¬¯¡¯­¯®²¬£³¬¥±°¢®­ °±£²«²¯£°¯µ¬¯­¤±°¢³±¡±¬³®£²®¢³®³¬¡²²¡²® °®³® ³¯¢³°¢³° ²­£³®¡³³¢¶´³²´²£µ± ²²¢µ³¢µ°¥´²¦·±¤µ®¡³²¤³°¤´´ ³¯¤µ´¤·² ´³¢´´¥µµ§³²§¸± µ±¤·±§¶´¤³¯£³³§¶²¤¹³£¶´¢¶´¤·¶¤¶·¨·´¢¸µ¤·²¤¹³¤´³¤·³¥·³¤¶´ª¹µ¥·³£µ·¢¸¹¥¹´¤¹µ¬¸·¥··¥º³§´·§¹µ¨»³¤··§·¶¤·´ª»¹¦·µ¥·³§¸¶§»¸§··¦¹µª·µ©¹·§¹¸§¹´ªº·«»·¨ºµ¦¹¶¬¼·«¼º¬½·¦¼º©¹ºª¼µª»·«»·§»ºª»¹­¼º§»·§º¸¬º»¬½¸©¹¹©º¶¨»¹ª»¹«¾»§¿·¬º¸«¼·¤ºº¬¹º¤»¸©¼¸¤º·¬¼¹©º»«½º¨¾»­¿º§»º«¼¹ª»»«½»§»¶©½»¬¾º¬¼»¬½½©½¹ª¾»¦¾ºª¾¸ª½·«Á¸©º»ª»¹¬¿º¨¿»­½»ª¼¹ª¿½­¼½©»»®À½ª¾»¬½»­À»«¼¾°¿¹­½¼­Á¿¬¾¿±¾ºª¹¶¡´­¬¡z|wlodz`~r_{w_{q_{z]{{g~|]{t_wd{b||b||i|`xdwd~bz`{x[ukUriUnfOl`Si[SgbIf[QdYMbQKdYMdUM`YK`[If[Ki[I`[Fd[Mf_Qg`IbYOdUIbYKdWMd`Og_Of]Kk`KndQnnOorUlnMniOrl]t|`xlx¥·¾¤¿£Å¢Å¥Á¤Ä¹ª©¨¡rQ§PA´CD¯DOTsxdcP½Gÿæ/º5P];§CäO©_çU ahwuTWÿ Ü"q«l¡gÊV%î³°gÓT¾}«®.ë'cÕTæ¦¸ã¨ºå­ºã¥ºßªµß«¶Ý¬¶ä¯ºí¹ÁúÄÈúÊÐúÔÙúÞßúáäúèëúêêúèìúèíúäéìûÌÞµôÉÌWêF,ó"<ì0)ð!Hß<È¨Î¬Ò®Ø£°Þ§³ã¦¸ä©»å©»èª»ãª½á »Ö·Ý¤¹â¦µâ§·Ü¦¶×±Í¬Â¤¶ § ÿN§T
ò_m}ovwftt@L	ñ
U~^lasÿnnrd|mH£Hòfdqh0Ó+o`vWÂKè¡|²k© Æ£É£´£dÎT¿qÇ¢£Í ¬Ó¬Ï¦§Ì¡¨Ï£¨Ò¤¬Ò©­Õ¨¯Ö©­Ò©¬Ï§«Ë©Ê¦È¥Á ¼¡¶³®xgr`wk[ukYogQgbMk[Sd[Q`YO`SK]YMdWOd`Qog|z¬¬«w¡wkg~bxYwuWugYni]oq]rnWriWto[wqd~ltzuok{ikixditudbtg|wf|{o~b|t[wiQqkUtl_uw[zzi~{iu| §¨·­¹Ã³¿Ã³ÁÃ²ÁÆ³ÁÇ´ÆÃ³ÅÂ´ÃÃ·ÇÅµÅÅ´ÆÁ³ÃÃµÁÂµÈÁ³ÃÂ²ÆÁ³ÁÃ³ÃÅ®ÅÃ°ÅÃ³ÅÂ®ÀÀ±ÁÁ´ÀÂ³ÃÁ±ÃÁ±ÂÁ°ÁÁ³ÃÃ¯ÃÁ®¿Á°ÀÀ¯½Á²¿¼°¿½®À¾®ÁÂ®¾»®À¾¯¿À±À½¯Ã¾±Á¼®ÀÁ¯Á¿­ÁÁ®¼»¯ÁÀ­ÀÂ²Á½²Á¾¬À¾¯¾Â­Á¾®À¼¬¾À¯¿¾®À¼®À¾¬À¾®¿À¯¿Á­¿¹°¾¼­Á½®¿»¯½À¬¿½­¾½­½¼®¾¹°½¾¬¾»±Á»¬»½¯»¼¯¾¾¯¼»¯½º¯¼¾«½»®¿¹¬¾¹¬¾»­»¼¯À»¬»»­ÀÀ®À¼¬½¸¬¿»²½»«Á¼¬»»¬»º¬¿Àª¾»­Àº¬¾¾­»¹¬¿»«½»­¾»©½»®¾»«¿¹­¹º¯¼¼ªÀ¼¬»º­¼»ª½»±¸º«¿¼®¼¹®»¼­º»­¾¾¬»º¬»º¬»¿­½»­¾º­¹¸¬¹¸«½º«¼·­»·¬¼¹¬¼·ªº¶¬¿ºª½·©··¬»¸©»·«»»«¸¶¬·¸¨¹»ª¹·¬»¶ª¹·¦¶¶«º¸§¹·¥¹·«»·¨·¸©·µ¬·µ¦µ¹§¹µ«··¨¶³¥¶¹¦¹¸©º¶¥·³§¸·©·´§»¶¦·¸¨¹µ§¶¸¬³³¨¶´¨·µ¦··§·µ©¶·©¸³§·¹¦½µ§·µ©´´¦µ¯¬µ´¤¹³¤¹´£³´©¶±¤·±¥µ·¥¶¯¥¶³¤µ³©²³§µ²§³µ§³²¦³´¨³¯§²¯¦³¶¥³³£³­¤µ³¤³¢©©°«®¬±©±©­ª±¬±¬³©°©®¬®«¯§²ª²®³¬²¬´«°¬²¬³¬¯«²« °¬±°³¬´­³«´¬¯¬´®²®±°³«²¬µ°³®¯¬²­³®³®²¬³¬³°³¬³®µ®µ¬ ´­²¬¶® ´®³®²¬³¯³­ ³°µ°µ¬·® µ¯£·® ´² ´²µ°¡·±¢µ° ¸°°°£·® ·±¢µ±£¶²¥¶¯´¯µ³¡¸±£·²¸´¢¹¬¡·³¡¸¯¢·³ ºµ¸³£¹³¢¸³·±¤¹´¦¸³¡¸²£·±¤º³£·´¢·°§»³¡¸±¡¸³¨º´§»³¤º·£»µ¤º¶§º°¤¸µ§·³¢º´ »´£¸³£¸³¥··¢»´¢º³¤·µ¤¹´¨¼·¥»±¢»²£»¶£»¶§¸³£ºµ£¹³¥½¶¡¸² ¸² º·¢»³¦º´£¹³ »µ£»´¨½´¢¹·¤»³¤»µ¦¾´¤·´¤¹¶¥»¸¤½·¤¼µ¦¾¶§¼¹¥¾²¥»µ¥½º£ºµ¦¿·¥¼¸¤º¶¨½µ¤¾¸¤»·¦¹¶¥¾º§¼µ¦½·«¾¸¦º¹¦¾·§»¹¨¿·©¹·©½¸¥»·§¸¹§»¬² £zu{twgk|du`|tYkYxrY~n[zr[~wUzrUxiO{u[|q]ztY~r_x_~x[zqUxrWzqUxgMulMn`QofOoUIgYIgYDgY?gUD_I=dQB_MD`S?fS?`U=`UB`M:dO?dYFdUI_QB_MBfS?`UB`U?fUDf[BiUDn]DigDniKkgFlYFkiStx`znrª¶» ¾ ¿¤¿¹¸­tnq~fY^"Ì'åî
ßFÉCÿéÿûèáo¬±eÎ\çãÿD¤JÿçêêÍ¨¿h)ì""ð>á4Ö¡³Ü»á¤¹â§»â§¸Þ§¸Ü¥·Ù¨¸Ü¬·ê²Àô¾ÇúÊÐúÌÕúÖÜúÛáúßäúåèúßèúâèíÿÈà²úÒÙáz4ò*ÕÂ¬é¬¼¿®+é$sÄaÌ¬Ò¡­×°Û¢³ä§ºå©ºä¨½ã¦½à¼Ý¡»Û¹Ý¡µÛ·Ó°Ë¨¾§´¢¦¢¨¦ÿÃ±ÿxizu3»;rxttYZom+µ4^]oÿkUxÿuYzavb/»3kipw`~H¨FçèçtPÆEô¦¢È¤·¡î,è$+ê$`ÐPÌ©Ì¬ÌªÎ«Ë¢«Ï£«Ò¥­Ñ¦°Ò¥­Ô£®Ï£«Ê¢¬Ç¦Ä¥½£¸¹­ªtbqY{iWt`Sn`Io[IgWIdQDgSD`QF`MHfFnXRS ¯«i]ÂLZ¾LU¹Ha¦Q|vn[zzYwxUuiMlfMrgOnkOtbKtgMrk[zfkwqfz[w`r_{fzW~q]klo|]tWt`gzY{fWwdIudQqlSwkYrr[zw]udw ¡® ±¹®»Á¯¾À¯½À°ÅÂ­Ã¾®ÄÀ´ÆÁ²Â¿¬Ã¾°Ã¾®Á¾­ÅÀ®ÁÁ­¾½«¿½¬Ä½­ÄÁ®Á¾°Ã¼­Â¸­Â¾°Á¾®À½©Á¿¬À»¯Â¾ªÀ¸¬Á¹«¿¼®Ä¾®Á¼«¾º¬À»«Ã¼¨¿»«Á¾§½¾®Âº¬À»«»»ª¼¸¬¾»©¾º«¾·¬½º©Áº«¾º©¾¸©À¾¬¿¹¨Á»ªÁ»«¾»«Á¸¬¾º¨»¸«¾¸¦¾·®À»«¾»©¾»©Á¼¬¾·©¾·ª¾¸©¾º©¾»®¼º«½·«»¹©¾¹¨½·¨¼·«½·©»¸¦¾¹¬»ºª»·¬¾·¦¾ºª¼¸©»µ¦½·ªºº¨¹¸ª½µ«»·¥¾·§½µ¨»·§½¸¦¼¹¦¼¸©»µª¾´©º·ª¹¶¨¼¸¥º·§¸·§»¸§¼·«¼¶§¹´©»»¤º·ª»¸ªº´¨»µ©»µ«»¸©¼¸§º¹«ºµ¦»·ª»·§»·©¹µ©¹¸«»·¥»¶¨ºµ©»¶¨»´¥º¸¥»·§µ·¤¸³§º´§»µ¥º³¤·±©¹´£¸³¤¸²§¸³¤¹·¥·³¤·³¡¸³¦¹µ¦·³£¹³§¸²¥¶³¤»³¥¸²¡µ³¤·²¦·­¡·±¤·´¤¹³¤·³£µ²£¸³¥·´¥·²¥µ³£¶®¡¶°¡³±¡¹´£µ°¤´²£µ® ·® µ²¤¶²¢µ²¥µ°¢·±¡¶³¡µ¯¤³°£·°¡µ°¡²®¡¶¬¢±°¡³®¢µ®£³­´®¡³°£µ®³¯£³®³°¡³¬³­¡µ¬£±°¡¶¬´­ ³¬°®¡´©¡ª¯³°¯® ±®³¯ ±²±° ²¯¢³®¢±±£³³¯° ²® °®£²±¢²°£¶¯¥®³¡°±³¯°± ³°¥³­£°³¡³³¥³° ³¬¢´²¡³±¢±³§³³¤´±¢±³¡´²¢±³¤µ²¤³±µ³¦µ±¤³³£·³¢´³¦¶±¢³³¤µ¯£¶³¤³®µ³¥µ³ ²´¥³¯¤³µ¢µ³¢¶³¤¹¶¢±³¤´´¢··¨·³¢´´¥³µ¦·´¥·±¥´³§·¹£·´¤¶¯¢¸µ¤·¶¢·¶§·µ¨µ¶§¸·¨·µ¤»´¢·µ¦·¶§º¶¥¹·¤¸·«¹¶¤»·©··¦¸·§¹·¨»·¥¼¹§·¶«¹·§»¹¨ºµ¦¸¸§··¬¹¸¦¹¹«¸º¨»¹§¹¹¬º¶§¼·©»º¨»¹«ºº¬¹·§»¹©º³¥»º¥º¸¬»·¬»»«º¹ª¼µ¤»´¨¼»¦º¹¨»¸§½¸ª¾»¬¾¸¤¼º¬¼¶¨»º¨¾·¨¼¼¬»»¥¼·«»»§½ºªº»ª½º§º½¬½¸¬¸¼¨¿»­¼¸¨¼¸¬¼¹¬»»«½¼¬»»¬¼º§¾¸«¾»¬¼¸¬¾¹¨¾¼¬½º©»¹©¼»ª»½¬»¼¬¿¼«¿»ª»¾ª»¹§½¼¬½½¬¾¼­¼»©¾»©À¾¬¾¾¯Á½­¼¾§¿À®Á½¬»¼§º°³¤¢|~~xoqlzd~_tbz`~xi{{`{{]|z_|rYz{b{g{{dx`f~{bz~]ww[zu[rw[qqUoiYrkQlfSgbYldUidMbbObUDdYK`WFbSId`I`]IbbKdYK`UK`_KgbMbYIdYKbUIb_K``Ii]MibKi`OkdKkqQoxWiiQnTtZRStzu|¯Á¡Æ Ä£È£À½¸¯ul{kzb{tbxoju>º<ûx¡¦ÿÜÚ]`zn¤¯¤úÅÔúÅâ¢abwowÿiu~w®r­°§ÁªÌ¬½¥§¶Ü¥·æ¦ºä§ÀÞ°µÈÉ¸¥ä­»ä®¹®ÁjÙX¶Ëø¾ÈúËÐúÏÖúÜàúÛäúáåúäêÿóyÿêÇß°Ý×Â³Ú,õ$£ÕÈ¿¢Âu$î¸~Ò ¯Ö§±Þ¥´ä©¶ê¬¼ï°¼í¯Ãî­Áë¬Ãé¤»ç§ºÝ ·Ò³Ê¬¸y°q¯¡¨­·×uÿaÇ_Y©`z|mÊ¢úÊÁÏ°¬n|`x]rYzqYzÿqiwokh{ub|tb|wgrs{ld[|ys dý÷¯¨Ê >â2Aá6£±±´pÎ\È± ×¨®Õ¤®Õ§®×ª²Ú¬¯Ø­®Ùª³Ý©±Û©²Ù¦°Ð¢¨Í ©É§Æ ¥¿¾·°¡tzbzq[{l[rfOobWi`Sg_Kb]MdYMfCJ
ñ[·OÃÄ `ÒH íìïîzj`{Yzu`tx_ux]ukYroSukQwkSuwbzll{xnfbzdk{d|{gktrlfui~|nb~k[{oUqlYtn]xxbtxb~b|~k{£¡³¥¯¼¯½Â³ÁÃ³ÂÆ³ÃÄµÅÂ³ÁÅ³ÆÅµÄÄ¯ÃÃ³ÃÅ±ÃÅ³ÆÃ¶ÃÁµÂÁ±¿Â±ÁÁ²ÃÀ²ÀÂ²ÁÅ±ÁÃ±ÄÁ²ÂÁ³ÂÁ®ÄÂ¯Ä¾±ÂÁ°Á¿°ÀÁ±ÄÁ¯ÂÁ¬Á¼®Ã¿²ÀÂ¯ÁÁ¬Ã¿®ÁÀ¯¿Á¯Á¿¯ÁÀ®À¾¯¿Á¯Á¿¬¾¾°¾À±¾¿¯¿»¬Á¿®Â¾­Á¾¯¼¾±À»¯¿»¯¾¼®¾¾­¿¾¯Ã½°Â»®¿¼°½»¯½¿²¿½¬¿¼°¾»®¾Á³¾¾¯¼½¯Á¾±¼½¯¾ºª¾¾­¾¼¬¼½¯¾½¬¼½¯¼À¬¾¾®¾»®¿»­½¼¬À¿¬À¿®»¼®»»«¹¼¬¾¼¬¿º¬½»¬»»¬À¼ª½»¯¾·¬»¼®»¹®½¼©½»®»½®»»¬½·¨º¾­»¹©¹·¬»½­À·ª»º©½»¬¹»­¾¼®¾»©»»ª»¸«¹»¨¾½°»»¬¼¹¬»¼­¾»°¾¹¬¼º¬½»¯¼»«½»¯¼¸®»¼¬¼¸¯º·®½¸¬º¼¬¸»®½·¨ººª»·¬¹»®º¹ª·¶©·»«¾·¬¸»¬º¹§»·ª¹¹¨¸·ªº·¦»·§»¸«¸·¨¹¶«¹·«¹·¨·¹¬º³¨¸·¦·¹©¸¶§··©µµ§··ª¹·¦··ª¶´§¸¶¦´¶¦¶µ¨¹·§·µ§·¶¨·´¦¸µ¤·¸¦¶µ§·µ¨´³¬·±¨µ³¤¶³§²µ§·³¨µ±¦µ³¥´µ¨°³¥´µ¦·²¦²·§³²¥´µ¤²²¡³³©µ³¤·³¥³²¥´³¦¶°¥³·¦¶²§²³£¶°¦³²¤²¥ª§«¦²©¯§­­¯¨°«±«±§±§¬ª³©±¬¯¬¯«´®²«±«°¬¯®²¬¯«²­±©´«°­³¬´®±ª°«´«³«³©³¬ ³®®ª³¯°¬ °© ³° ³¬±¬±°´¯³¯±¬³®²®²®¶­³­³¬·¬³± ´®³«¢³­ ´²µ±´¬³°¡µ®¢µ®·²£·®³®µ°´®µ¯·®¸¯£¶° ·²¶²¡·°£·²¹®¢»° ¶°£µ²¡¸¯¡µ± ·³¹±¡¶²¡µ³¥·®¡¸±·´£¸°£·²¹³»²¢¸°»±¡¸µ£·±¥»¶¥¸³£¹µ¡¸´¦¹²¥»´¦¸·£»´¦»³¢»·¤»±¡»µ£»µ¤½´¦ºµ¥¹³·¶¤¹µ£¸³£º³£¸´§º²¦»³£º±¢»³£½´¦»µ£¹¶¥¼·¦º¸¤»´¥»·¥»³§»·£½µ§º¶§½¶¢¼·¨»·¦»¶§¼¸§»¶£»¶¨¼³¦»¶¤½´§»µ¤»¸§»´¨»¹§º¹¦¼µ¥»´¤»µ¤»¸©¼· º·©»·¦½¸©¾º©½º¤¾º¨¼·§¼¸§¾¹©½·¦»»ª»º§¹»£¹µ´¬¯wzuwqg~fxbt]qW|n]zWxq[|[{o[{nWzrY~`u]|o[qY{|]~nY{lSwiMwkQukQufItbQngMnUFiYMfbFoYDfYBdKB`M=`I?`M?dS?bQB`WFgSBfQ?dUIdYFdQ:`M?dKDdO?`UDdQ?kU?b]Df]IinMokBqAK	ïHFgrz²½ Ã¢Ä¤Ã¤¿¼³«{k|doUzgUwu[wqtqíîf·`«³¡¢fm÷aeUd¬ú¬´Ó¨|wUSzYYt¢ Ã­»«¶­¼«Ç«Ò°Û¹â¤»ä¨¾jØY÷Ëº§ä«»Éuó8ê0õÖ}úÄÎúÍÓúÒÜúÖßúßâÿ·ë¨ÿüüû`ìTìËÉÜs)ò!)ñ#$ñrÇ_É¬Ð°Ø¢³Ý¦µä¦¹ë¬¾ï°Ãï³Äò¬ÁéªÁã¢¿Ù¶Ð²Ç¬Á¨TÉNõ¢©¾´·ÐDì< óòßdgñ£ú¼â¾Å»wnxSwSzSuK{{Wr[{ltnxiq`zk]zo[ww`zxwv	ö4Ø/ô­¨¿¤,ë$/è'ô-ê$¿¬Ö£­Ø§­×¡³×§³Ø¨±Ú§³Ü¬¶Ú¤³Ü¬³Õ¤®Ò¯Î«Ê§Ç¦¾¡¾¡¹³¬qx_qYtgYr`Qn`FlYKiWBiSBbBlQÍíXÆIÉ¡Ð¤¢Í¡¾®'à &Ú!W{zSwnWqlQqq]tzYxlMolOudIqdOtl[x|diqrb{`x_t[w_qUnY|q]lkfw_tdt_zx_{fOt_MwfUqfMqfSuqWwr]wwd~n¢¨«°¤¶¾°¾¾¬¿¿´Á¿¬ÃÀ­ÃÀ±ÁÁ®Å¿¬ÃÃ¯Á¾¯Ã¼¬Ã¿®Ã¾¯ÃÀª¿¿®Ã»«Á¾«Á¾¬Â¾­Ã¾­Á¾«Á»«À»«Á½®À½«ÂºªÁ»¬¾»©Á¹«Áº¬À¸ªÀ¸®Â½¬Áº¬½½­¾º­Â»­Á¼¬À»¬¾º«Áº¬½¸®À»©¼¸©¾»§¿º¬¾·ª¾¹¨¾º«½º¬º»«½»©½¸ª½¸«¾»ªÁ½ª¾º¬½»¥¿»«¿¸¨»¼¨½¸ª¼ºª½¸«Â¸§»º¨»º¨»·¬»¸¨¾¹©½·©¾µ©¼·©Áº«ºº¦»µ«½·ª½¸¤½·«¾·¦¼»¬»¶¬»·§»¹©½¹ª¾·¨»µ§»µ«»·¨½·©¼·¥¼¹§»·§¾·§»¸¨»¶§»¸©¾·¥º·§¹´¥½·§¹´©¶´¦º¶¥»´¨»³¨·³¦º³©º·§ºµ¦ºµ§½¸¥¾µ¥»·§ºµ¦ºµ©»¸¦»·¦º³¨¹·«¼¸¦»µ¥º²¥·µ¤¸´¦¸´¥»´¥º´¢ºµ«»³£¶³§»²¤º´¦º³¥·³¨¹²¥¶²¥¸²¤¹²¦¸³£¸³§¹³£·°£¸²¡¸±¦¸³ ·²£µ²§µ°§·±¦¶´¡µ°³²¥¸° ·²¦¶°£·³ ·²¤µ°¦µ­¡³²¦·´£³°¢¶¯¡¶°¢µ±¥µ°£µ®³°£·®¤³²³®¡´²·°£µ­£²±¡¶­ ²®¡³®¡±¯ ³¯¢³®£¶®´®µ¬¡´®³­ ´¬¡±®´®²­ ²¯´²²¬¥³¬£°¬ ³¬£±ª«± ¬®²°±¯¡³°£³²¡²±°± °®¯² ²¯¢³°¯¯³³³³ ³±¡°°¢²²¢³±±³ ³®¡±³¡²­¢¶°¡³³µ¯¡°°¥±³³±¢´³´¯£µµ¡²¯¥µµ£³³¥³³£´¶¤µ³¡µ³¤µ³¡´°£µ³¡³±¤³µ ²³¢¯± µ¶¢¶³¢´³¤·²¢µ³¨¶³£¶³¡µ³¡´°¡´²¥³µ¤µ°¥¶¶¥·³¤´¶¥µ´¦¶¶¢¶·¤µ³§¸¶¥¶´§¶µ¡¸¶¤·³¥¶µ§¶¶¤º·¤¶µ¤¶¶¢··¨»·¨¼·¦¹³¨»¶¨¹·¤¹¹§¹·§·µ¨·¹§··¨¸¸¤¹º¦»¶¦¶µ©¼·¥»·©º·§·¹¨¸´§¹·¤¹»¬½º¨ºº©¸º§½¸ª¹·©º·¦»·«º¸ª¼¾¬»»©»´¦»¹¬»»¥º·¨½·¦»»§»¼¬»·­»ºª¹»§ºº¬¹»¦»·§½½©»¼ª½¸­½»ª½»ª¼º¬¼¸«º»©º¸©½»­¾¾¨¿½ªÀ»¯¾¼©½»¬º»ª½¼¬¼½«¾¼¬½»«¾¾ª¿¼¬¾º¬»»ª½»§½»®½»ª½º¬¾½¬Áº­¼¼¬¼»«¿½­À¿¬¾º¬½»©¼»®¿¼¬¿¾¬¾¾ª¾¼®¾¾®¿¾¬»¼­Â¼¬»»¨¹·¥µ©«{~uuokf|dx`xw_zf|fg~xb|~[{{i`{gz~`kdx`|z[|r[wnUtuWzqSrl]trYqdWibSkdSkbQg]OdWF]UI_YK`_Bb[KbbK`bMb]Qb]MgbQbbMg`Fb]KbYKd`I_bQdbFldMdbMkiQqqQnYsVÐéB³@t¤ªÁÌ¦Í«Ð«Ê§Å¡Ãº´|xfx[~wdzoz|zvcÁ[ñ¢ÁÈ¬¬­¡'Û("Ü d`fbrqqnof]_`ix¬ ¢Ø®¶×±¶Æ¢¶Å¯Æ®Ì´Û¹ç¬»±ÇþùÏ¿¨Ñ¿¨$óÐlÛ¹¸Öq&õÚÎ²úÎÕúÖÜúÛßúßåúãéÿÚèÎÁè³Áá°ÁÞ«ÚØ¾øÍÑúÆÑÙÂ¬¦ÉÁ´Ö°Î­Ö ±Ý¦³ç­»ì°¿òºÅù¸Çú»Ëú·Æó®Åæ»Õ´Î²Ç«¶ýùµÂ¡ØÀÁÞÐ¾ÚÒ¼aÛ[û}zbiu{~nbr``_[bk¢ zrgzb|xf|ÞíMÁA÷
¿j²±ø#ð¿aÚO,î$Í´£ß¯³Þ¬²ß¬·á°·ä¯·â²µá²·á®³Ü­²Ü«±Õ§­Ò¬Í§Æ¦Ã¤¾¡¶²§xi|fobwlYqlUlbYkbMi[S_Y]calgìcÏLÙª§Ü¦¦Ó§Ê¡pø\\wWuu[ru[tuUow`uzbwtWruYqlSqiSut`{lo{uk{kfib|z]|r`{w`|orn~bwbwiktWwiWuoWrkWtiStx[wzd|ft¡© ¨¸¬µÂ³¼Ä±ÃÃ´ÇÁ²ÃÆ²ÃÅ³ÃÆ³ÁÄ³ÅÄ³ÃÁ±ÂÆ³ÃÁ°ÄÅ³ÂÅ°ÂÂ±ÄÃ³ÁÂ±ÁÂ³ÅÃ´ÃÃµÇÀ¯À¿³ÃÂ³ÁÁ°ÃÁ¯ÆÀ³ÅÀ³Ã¿­ÁÃ¯¾Á³ÂÀ³ÁÃ°¿Á¬ÂÀ³»À±ÁÀ¯Á¿¯ÁÂ±Á¿¯ÁÁ±ÁÁ®¾¿®Á¾¬Á¾¯À¿¬¿¾¬¿¿¯À¿¬½¼­Á¿°¼¼®À¾²½Á¯Ã¾­½¾²Ã¾°À¾­ÃÀ®¾Á¬½¿±¾½°½»¯ÀÀ®À½®Á¼«¾½®¿½®¾Á³½¾¬Â¾±¾¾®¾À°½¾¬¾½¬¾½¬¾¾¯¼¾¬¿º­¾¾±À»­¼»­¾»°¾¾¬»»­º»¬½¾¬½¾¬¾º®¼½­½½¬»»­¾¾¯À¼­¼º©¿»«¼»®¾»¬¾¼¨¾»¬»¿¯¾»¬»·­¹¼¬¾¹­½ºª»¼«»¹¬¼¼«¼¹­·º¬¼»«»»ª½¹«¹»¬¹»¬»»­¼¾®»»¬º»®»º¯¼»«ºº¬»·®»¾¬º·¬¾º¬½»¬¼¹«¹¹«»º¨¹¹ªº»¬¶¹¨º·¨·µ¬»¹§»·ª·¶¦»¹«·¹¨¹¸ª¶¶©¹µ§¶·¬¸·¬·º§¸¸¬¶µ©··¦µ·¦¹·¥³·©¶·¨·´§³·§·µ¥¸´ª¹·¦³´¥µ³¦´µ¨¶·¦µµ¨·´¨º¶§¶´§´·§·´§¶´£¶µ¥³¶¥µ´¨´³¤´·£¶³§·µ¦·³¡³´¥¶³ª·³¤¶µ¢³²¦¶´¤·´§µ³¦³±¡´¶¥´°§±µ¥³´¡³²¥³³¤´µ§°µ§³´¤·³©³´¥³ §§©¨®©±«¯©®«±©°«°«¯ª­ª®«¯¦¯ª®«¯«²ª°«³¬°¨®¨³ª±«¯«²¨²©®­²ª³¬±«±¬³©°«³«³¬±­±¬¯¬±¬±® µ¬°¬±¬³¬µª±­²¯³®·¬²­°²²¬°¨³®µ¯¡´¬³¯±®³®¥·«£³±¡³®´°·° ³¯´¬´²¡µ°¡³® ³³ ³³¢¶²µ­ ¸® ¸¯ ¶²µ°¢µ³º±·°¢·°¢¸³¸°£µ®¢º³¢¸°£·¯ »³£·³£·²¡¸¶¢·²¡¸°¢¹®£¶· ·±¦µ®¶² ¸³£¸²¤¹´£¸³¤¹³¡¸³¥¸·¡¸´¤¶³¡¹²¥·°¦·¯¸³£¸³£¶²¡»µ£¸³¥»´§ºµ ·³¤»³¥»·¥º°¦ºµ§º¸¨¼µ¤»·£»³£º¶¦»µ¢¹³¦º³¤½·§»·«¾¸¨»°¨¾·¦»·¤ºµ¥»µ¥¼·§½µ£»µ¦½³£»¶¥»·¤½·¦»³¦¼·§¼¶¦»µ¦¼·§¾·©¾¸¥»¸£»º¦¼·©»·¤¼¸©¾µ¨»µª¼·§½·¤½¹§»·¨¾·£º¸¨»´¤¸²­¥¦~xzxqqgzbz`r]{uS|nYwtY|z]|w_nU~qYxrU{t`{rYzt`|u_{[t[zgQ|iOtiOqgMrgOrdOndQrYIgYFgYKdY?dQB]MBdM:dK=]Q:`O?_MB]S?_I=]QDbQ=`YD`MB_IBbF?`O?_QDbU?dY=g]?gbDnfIlWNcU[gäD±Br¤xªÁ£Ì§Ê©Ê©Ç£Ä¡½µzg{`z]{zpvzwz¨)í#ÎpÈ¬«©øfde_Zvpw|UfYG~a*¼5]e[_b~vÀo¾Å£à»¾Ó³¸Ì§µ£®´Â°Ê¬®úNé?øÏ¾¨µÆ&ò¹½â®½¿À(õ ½ÓúÈÓúÏÙúÖßúÛãúÜåúáäúßæúÝäúÕàúÒÝúÌÖúÊÕú½Êó»Àå¬»Ø ´Í°Í®Ï¯Ù£²á©ºì±ÂòµÈúÁÌú¿Ïú¸Ìð¥ÁÔ¸Ê·Ð²¾¥¦
úHè<ø»È¦àÌÁêÕÇÎÐ±ôî\`YeTZYqr_Q]W~IW?²;ZXc]iv¶ia`C®C.Ã/
ò
÷÷þ-ç&ÂjöjÓXÖ©²Á°+ï#Åyß©¹à­µâ®¹ä°¸à­»ß®·á«·Ý¬¶Ø«´Ø¥³Ò¥°Ë ¬Ë§Ã¥Á¡½µ­§t{bz[|l]rdQqdKkYKkYIiUDfQIf\llë`ÌLÌÉÅ¯w'Ö#ÔiModIqkOriMqkUqnOrqWokKriIqdMqdMnkUu~bnrgbw`zd~{``zY|gS{nY|tbolq]nWqd~gxYw_KtgQwfSodQrkQwkYuzbzf£©±§³¶«¾¾«¾¿¯Ã¿±ÀÁ­Â¿ª¿¿²ÃÀ®ÃÁ°Á½®Â½®ÄÁ¬ÀÁ«Ã»®Á¾«Ã¼¬À½«¿½¬À¼ªÀ»«À»¬Ã¹¬Á»«Á¾¬Á»­¿¹­¾¼­À¼ªÀ¾¯À»©¿¼§Á»¬¿»«¾¹¬½¸©¿»§Á½­½»¬Â»«½»ª¾»¬Á¹¬¾»©¾º©»·«¾¸©¾»¨¾»©¾·©À¹ª½»§¾¸¦¾º§»¹«¾»¨»¸§½º¦¿¹ªÀ»«½·¬»º«¾·ª¾ºª¾¹§À¸¬¾¹«¾¸¦»¹«¾»©»º©½¸­¾·ª¾·«¾¸¨½¸§»·©º»«¸º¨»´ª»¹§½¶©»¸ª¼¶¨¼·¥»·ª»¶¨»·¨¼¸§¾¶¨¸·¨½·§º¸¨»·¥¾·©¹µ¦½³¦»·£¼·«º·§»·§¸¶¨»µ©»·§ºµª»¸©¼·¥»·§º³£º¸ª¼·§»´§»µ¤¸µ©¸³§º·¦»µ§ºµ¨¹¶¦»¶¦º¸¥º²¨½·¦·´¥·³¥»¶©¼·¤¹µ¥¸³¦¶¶£º²©·³¥¹µ¨¸´¥·µª¹µ¥¶¬£¸·£º°¥·³£¸²¢µ±£´³¢·³£¸´¥µ²¡·´¡¹°¦·¯£¶²¦µ®£¶±¢·¬¢µ³¢µ²£³°¤µ° µ²£¶®¡µ²¡µ° ¶¯¥¶²¢¶³¡·®¡¶±¢´°£³­ µ±¢³°¤µ®£³± ²® ±¯¡´®¡µ¬¡°¯£¶­¢¶±£³± ³­·¯ °¯ ´®²°¡²° ´¬ ·®¡²¬²­ µ° ³®¡´¬ µ¬£³®µ¯ ²®¡­­¢³¨«²±®¯²¡°®²¯¢°±¥³®®¯¡°¬®°²±¡²¯ °²¢³®±²²°¯±¢²³¡³³ ±°¡°³ ³³³²¯²¤³±¢³¯ ²¯¢²°¡³³¥²²£²¯¯° ³²¤¶¯¡³³¦µ²¢³²¤´°¡µ³£±³¢´³¥´²¢³± µ³¤²³¡´°¢·´£·´£³®¢³³³±¡²² µ³£µ³¤¹³¢´³¦¸´£³³£´³¥·³¤¶·¤µ³¤»³¦µ²¥µ³¥·µ¤¶³¤·³£·³¡¹µ¥¹¶¦¶´£·¶ª¸·¥µ¶§·· ¸µ©¶·¦·¶¤··¨º¶¢»¸¤µ·§··¦··¨¹¶¨··§ºµ¨¼¸©¹¸©»¹§¶¶¨º¹ªº¶¥·¶¥µ·¦»¹¨º¶¦¿¹©¹¸ª»»¬¹¸¨»¸¨¹·«¸»¨»¹ª··§»¹§¸¹¦¾·¬º·§·µ¥»º¤º·¦»¶¨»»©¹¹§»¹­½¸§¾·§¼»©»¹§¾»¬»¸­½¼ª¾»¨·¹§¿¸¦À»ª½¼ª½º¬»¹­¼¾ª½·©¿ºª¾º©¾¾¬»½®½»¨½»¦¾·¬»¼«»¼¬½º¬»½¨¿¾«Áº§¼¾ª½»¬¾»¬¿¼ª½½ª»»¬¿¾«¿»¬¿¾©À¾ªÁ½¬¾»­À¼¬¿»ª¾»­½»­Á¾¨»¾²»¼©º³ ®§§{|{xnfbxd|zW{o`|zbzd~f~|_{x_|z_{ud~u]{wb{`~~i|w]xrUwqYxnWlo[xoSqkSnnSnkSqdMgiUdfKg_ObUK_YFfUB_]DgWMb]Mf[I_WOd[Ff[I``Mb_Ib]IbYDdWKb`Od_FfbQiiMflSknQokMn^]jæK¹B©~¬ºÑ¬×¨®Ö£®Ñ¡«Êª»¥² ª {iikÿ4Õ.u«k¨cÕX$ó·ÁÐ³³;Û7ètE·@ð}uv`L¢Jâ&Ô%äW¥SkqIÈG÷ÊÏ¨ñÈÄâ¿Á ÍøÖmç¤Á3ì, ötãbû§ÕÔ~3ð*Ï¾«è¶ÀÔ¿®3ò*¦ÜúÎÕúÕÜúÜàúÜæúÞçúäéúâêúÞæúÙãúÖÜúÒÙúÊÔúÀÌö»Ãë¯¿Ü¤¹Ö¡­Ó¢±Ø§¯ß©µç³¼ó¸ÈúÃÌúÉÒúÊÕú»Íê§ÄÔ½Ü¾ì¬¼6ð- øpè\ü
áßÛÀòÝÍáØ¾µÁdºeçur@·@ï
hspp],Â2Þ'Ô&á1Ë.owRÕH÷¨ª¥MÆDèÿíðJºBõ
°{Æ¤¢Fä7Bç4º½uÕ_(ó Ç¿ê³»êº¼ê·¾ë¸½ë·¾é´¿è¯¼ä²·Þ®µà«²×¦®Ó¤°Ð©Ë¨Ä¦Â »¢·¯¡i|fu`qr[ul[niUnfSifSi`WnlsoìbÊLÆÁ¬{pj÷RSoOnqQrzWnwQnuYx~[xw]wu[unQrqOtkQtr]zitkqnikkn_r]u_{|d|uodz`~xn|ui{iSznYto[rn[uoYwwb{{fi¢  §·«µ»¬»½³½Ã³¿Å¶ÁÂ³ÃÂ³ÁÆ¶ÃÂ²ÇÃ³ÃÁ²ÄÂ°ÂÇ³ÁÂ¯ÃÂ³ÂÄ´Æ¿³ÄÁ³ÁÁ¯ÁÄ¯ÁÃ±ÀÀ¯ÂÁ¯À¼³¿Á¬ÃÂ®ÁÁ°ÁÂ°ÁÁ®ÃÁµÂ¿¯ÁÂ±ÂÁ³Á¿¯¿Á°¾¿±Á¾³ÂÂ®Á¾¬ÃÀ²ÁÁ²ÂÁ®ÁÀ¯¾Á®ÂÁ²Á¼­À¾®Á¾¯À¾¬¿¿³¾¾­¿¼¯Á¾­½¿¬¾¾²»Á¯½¾­¿¿¯Á¾°¾Â¯¾¾®½½­¿¿°½¾®¾¾¯¿½¯½»°¿¾®¾À­¿»«À»¬¾¾®¼¸¬¿¼µ¿¼¨½»®»¾®¿¿¬¾»­»¼­¾º­½»®»»°½»¨¼¼®½»¬¼»ª»º±¼¾©½·¯½»­½»¬¼»¬½»«½»©»»ª½»­»»«ºº«¼½®¿¿­»¹­¾»¬ºº­¾º¯»¸¬¾½«º¼«»»­»»«¼¸¬»º¬½»¬¾¹¬¹»¬»¼«¼»¬»º­½·¬¼¼­¸½¬¼»ª·¹¬»»«º¹ª¼»­·¹¨ºº©»»¬»¸¬·º¬»¸¨»¸®··¨·¸«¹·ª¹¶©½¹§»¸ª¹º¬¹¶¨·¶§·µ¥·¸¨¹¸¬¶¶©¹·¦¸¸©º·ª¹¶ª¹´ª¸·¬µ¸¥¹¶©¹·¦¹µ§ºµ¨³¶¦´¶¥´¸©µ´¨µ³¦¶ºªµ³¨µ´©³¹¦¶³¦²´§··¥µµ¨·±¥´¶¤¸³¥µ³¦´µ¦¶´¨¶µ¦¶³©µ·¨µ³§³´§µ´¦³²¥³±¤´³§³³¢´²¡´³§´³¡´³ ³¶¤±µ¥·´¡µ±§³³¦³µ¥³³¤´¶¨·ª§¯§®«­¨­«®©¬«®«°§®©±«°¬­«¯¨±¬²¬±©®«°¬®¨¯ª°«²«°°²¨¯§¯®±ª±§°­°¬ °«²©±«±«´¬¯­¡°¬²­°¬µ«³­µ®±¬²®´¬³­£·°²«²¬¶¬²¯µ¬³¬³«²¬²¬µ¯³®³®³­´®¡±¯µ²¡´¬ ³¬ ¶¯·®¸¯¡·«´°¢´°¹²¶±¢µ²¹²¢³®£·¯¢µ²·±£·­¡¸¯¢¸°¡·°£·³·°·³¤·­¡¹±¦·± ·³¡·³¢·¯¸³·³£µ³£¸±¦º³¢´´¤¸²£·´¥¸²£»¯¥·²¢º³¥¸´¢º´¥¸¶¤»µ£·³¥º´¤´³¤»² ¼³¡¹³¤¹± ¹´¡º°¥¸µ£¹¶¨º´£»¶¤½³£»¸¤·´¦º´£ºµ¦¼µ§¸·¦»µ£»¸§º¸£»·£»³¦¹µ¤¼·¦»²¤»¶©»²¦··¥»·¦¸µ¤¹·§»¸§»·§¹·¢»·§¼·¨»·¥½·ª»·§¼·©º·¦»»¨¾µ¨½¸¬¾·§¾º¥·¸¨À»£½·¦»¸¥¼¶¦¼¸§»»§·µ¤·¬ª£zxwutonz`tWxqSugQxnQtrYqb{|Sxt[znWxqWxnYznOznYwu]zrYxkWw`MrgOqgMrkUofKobQnkInYKigInYIfYIkQ=bS?[K=`O=_MB]S?`M:`OB_Y?]O?dQ=`YFdMD`M=_Q:`O=gM?`U?dW?dY?lbFofIkdIo^TkåMºD§xªÁ¥ÒªÖ¡®Ø£±Ð®È¬»¥µ «¢zg`ÿ¤rÿ ëï"ð©ÂÑµ°½µ EÙ>}zggýó
ytvyur,Ê*ge]~][åyrpkýù
ÇÒ©íÊÅ»ÎAí7øÝk¶Í%òùûþ:ï/×o#õµÂå³Å¹Æ$õ¼ÒúÊÔúÍØúÔÜúÚãúÛèúàåúÜèúÞãúØßúÎÛúÊØúÃÐúÀÍò·Æç¬¾Ù ¶Ñ±Î¬Ó£´Ü¨·ç¬½ñ¸ÄúÁËúÍÖúÈÒù°ÌÚ Àè¨Áñ«Æ´Ê'ôúüþ7õ/¡äØàµïÓÊÝ·Ãã B´Cý
ó
pppqkpäQLvqsP¥Lær|uwv®pýù§´¾£¶ÿzÿ"Ø#yvEÈ>­Ê§Ï¨¨Aç3ö'ñÀ¾é·½é´¹è³Àè·¾çµ»æ³»ç´¾ã±¹à«»Û§·Ú©²Ò¥°Î¬Ì«Ç¤Á¡Â»µ¯¤xft[{nUwgUr`Qq_IiYOfÿYQlipoëYÃF®¤o~]$Ã&Ý`PglIliIrqMutSz`~~[z~W~tSwgItiKogMwnYx`giid|dwbx_|f{]~oSzgWzu_~|dl|`qYu_n{]|bMu]FulQq_IrkUttYzw]|zd|° ®»©·º©»¾¬Á½®À¾¬¿¾²Ã¼±Ã¾®¿¾®¿¾­¾»®Á½®Ä¾¬À¼®Á»«Á»®À½®Á»®Á¼©¾·©À¼«¿¼«Á»®Ãº­À»­Á½­¾¼«Á¼¬À»­Á»¬Á»«À¹©»¼¬À¹¨Á¹¬Á»¬¿½©¾»¬Á»©¾·¬¾¾«¾¹©¾»ª¾»¨À½ª¼¹¬¿»¬»¸©¾·«½»§»º¬º»¬¾»©Á¼©¼·§¾º§»»ª½¹¬¾·¨¾·ª½º¬½º©¿¸¨»¹«¼¸«½»§½¸©¿¹¥½º¨¾·§»µ¬ºº®»º¬¾µ¥»¹ª»¸©»¶«»µ¬º¸¨¸·ªº¸¨º¶©»¶¥½µ§¼¸©»·¥º·ª¼³ªº·ª»¹§¼¹¨¸·©¹·ª»·§··«¼·¦¹·¨¸·§º·§º³§¹¸©»·§½³¨½·§º´©»¸¤·¶©º¶¤¹´©··«»¶¨¸¶¦¹´§º·§»±¨¸´¤½º¨¸µ§¹·¦¸·¥¹¶¦¶µª½²©»³£»¶¤¶³§¸¶¦»°§·¶¦»³¨»µ§·³£µµ¥·±§·²¥¶µ¤¸´§·³¦¶³£·±¥·µ¦º°¤µ±§¶³£¶²¥µ²¥¸³£·²¡¶³¥µ®¡·°¢µ®¤µ³¤´®¢´­¡µ±¡¶²¦·±¥µ²¡µ°³±¢µ®£³²¡·¬¡³¬£·¬£µ°³®¡µ®£²¬´°£³° ²°¡µ¯¥·¬²®¥µ«£±¬¡³¬£±® ³­ ²°¢³¬´«³®±°³¬¯­¡®­¡´¬ ­²´­¡³¬®¬¡²±¥²«´® ´¥¬® ±® °®°¯°±£°®¯°±¯ ²¯°®²±¯°­°¡³²¡³³ ³¬¢³¬ ±³¡³¯ ¯® ®° ¶³¢³®¤²³³´ ²²²¯³³ ³¯¡²²³­¢µ°¡³±¤µ³£µ²¥µ³ ´µ§µ±¤³²¢±±£³µ¢³²£³¯¥°°¡·² µ³¡µ²¤³³¤µ³¥µ³§¶®¥·µ¤³µ§¸´¤¶³¤µ³£µµ¢µµ ¶³¤³³£´µ¤µ²¤¹´ ¶³¥¶²¨¶µ¥¹´§¸°¡µµ§·µ¤¹µ¦¸´¦¹µ£»·¨·³£·³§¸·¨·´¬··£¾·¦··¥¸·§¼·©¶´¦·¹¦¶·¨·¶¨·µ©»¶¨¹µ§»·¬º¶¦»µ¦··¥º¹§¹¸§¹¶©»»¤º¸§·¶«µ¼©¹»¨¾·¥¹¹¥»»¬»º©»·©¹»¨·º¬»¹©¼¹¨¹»©¼·ª»¹«º¸¬·¹¨¿»©¼¸«»·«»º¨»º©»¹«¾º¤º¼§»ºª¼º«¿»ª»¸ª»¹«º»¨»»©º¸¨¸¾¬¼¿°½º«¾ºª»·§»¹¬¿¼¬º»¬¾»ª¼½¬¼»©¼½¬»¼¬¾½­¿¹¬½½¬½¾«¼¾¬¾¼­¾»ª¼¼¬À»­½¼¨Á¹¬¿½®À¾¬½½«¾¾ª¾¾¬¿À¯Á»«¾¼ªº½¬»º«¸¯­¡z|{zwd|`u]wrW|w`w|`iz`|ub|zbzz_zx[zw_{z`{~bxx_zxYwlQoqWwrSuqYrkUtiWgiSn`SklSniUgdUf]Kb]MbQD`UKdUI``M`[Ii_F`]O`[Kb]Mb`Mf[Ib]Md[Fb[I`[F`[Ik`OibKloQlÿlUtogpèU¿I°·Ð ¨à©²ä¬´æ«·á¨µÛ¤´Ù¢¯Ó©Ë¨À­{nuÿÇ²©ÀwÇ»¥Õ¿¹Ø··Ñµ³Æ©«¢	÷	0Ñ.ð|vdvyjb?Á=)Ø'
÷
;á8øÐ×²óÐÎáÎÁÙÆº'õ!}äiÿç¹¿ÎÆ¯Þ|úÁÓáÂ»6ð+cßQÆÄ£dãR7ñ-êÎÆúÏÖúØÜúÛàúÝçúßéúäêúäîúÝçúÙâúÒÞúÌØúÈÒúÁÍô»Èì³¾à¥»Ø¡²Ö°Û§µâ¬·ë¯¿÷ÀÈúÊÐúÎ×úÊÖù±Îç¬Çõ³Êö¸ÌÿçÅ½ÕÐ±Ýzû½Ý Äá¨OôD¬èÈË«dÏ^ì÷/Î,ðzyxaH¯Fðùñ
H·Bvù
=ä7÷³ºÕ£¨Ö¬Ãÿøujt¨¿¢Ó©âª±àµ³´ÉÞ¿±ñ»Äñ½Æó¿Áô¾Âñ½Äò½ÃñºÁî·Âë³ºæ²¼ã¯¸ß¯¶Ùª¯Õ¨²Ô¢­Ï¢¨Ç§Á¥¾¹¡³ªrf{r[zq]qnWldSgÿfKgÿvmtI¾<w_lfjam(½*Yr\q[owUttSwbzx³¬zifuSxtWtoYuu`|llnnlff~`|igbwf{~fiod|bzgri|fUxiSuo[rnUutWuu_x~f{~kt¯¥­¼®·¿°¼Á±ÀÅ³ÅÅ³Á¿³ÄÂ±ÄÂ³ÃÃ±ÃÃ®ÃÁ±ÃÂ²ÂÂ¯ÁÁ°ÃÂ®Ä¿²ÁÂ³Ã¾°À¿±¼Á°ÁÂ±ÃÁ¯ÀÁ³Ã¾¯À¾¬ÂÁ¬¿Á³ÂÀ¯ÀÂ°Á»²¿¿®ÁÀ³ÁÀ³¿Á°¾¿°ÀÂ°ÃÃ®¿¿²¿Ã±Ã»±½À®¿»«¾Á®À¿®¿Á¯ÂÀ®¿¾°¾¾®»¼°¿¾¯¾¾­Á¿­ÀÁªÁ¾¬¾»¬¼¾°»½¯Ã½¯¾¿°¿½°¿¾®¾»­¾¼­Á¿¯¿¾¬»½°¾¼®¿Á¬¾½ªÁ½¯Á¼¬À½¯¿¾¬½¼¬¿¾°»¾¬¼»¬¾½¬½¼±¼¼¬½¼­¼»¬º¾®½»¬¾»®½¼¬¼¼®¾¼¯»½¬¾º®»¼ª¼À°¼»¬¾»¬Á·©¼·¯»¼­¼»«º¾¬À»®»º®·º«¿»ª»¼¬»·¦¿»ª¹»­»»«»»ª»»«½¸¯»¼¬»»¬º½¬½¼¬»¼¯»·­»º¨»ºª¸¹¬»¹§¸»¨¹·¨¹¸¬¼¸©·¸©»·¨·¹«½º«º¹ª¼¼ª»·©¼·«·¹¤¹»¨·¹©¼·§º»ª·¹ª¸µ¦¹µ¦º¶©¸¸ª¸»«·¶¦·´«¸º§¹·¨·¶©·¶¨¸¶¨·¶¥¶µ¦·¶ª¶±¨·¶¦³·§·¶¥··§¶¶¥³·©¹³¦·µ¨µ·¦µ¶¥¶³¦·²¤µµ§´³¥µµ¤·µª·¶¦µ³§¶·§·³§·´¦·°§¶´ ³¶¥µ³¦·¯¢·³¨³³§³³¥³°¤³°¦±³¦·µ¦³³¥²²¤³´¥¶²§³³¥±³§³³§³±¡µ³¥³£«§±¨­ª°«°¨±ª®¨°«³©°«¯¨±§®©±¨±ª³©°«°«¯©³ª³«­ª³«³­±§²¯³«¯®³«¯ª²­²¨°­³ª¯®·°µª·¬±¬´¬³¬µ«²°µ«µ®´° ²®´¬µ²²¬¶°´¬ ³° ´®µ²³­³­´«³° µ¬·­ ·¬´®·° ¹­´¯µ®·²¶­´° ·²µ¯·¬¶¯¡´®¡»± ¹± ·²¡¸²¥·°º®·¬¢¸³¶²¢¸²¡·¯ ¹³·²£·²¢¸²µ®¢½°¡¹²»³¹¶ º°¤º±¤¸³£º´¡·´£¹´¡º³¡»³£»µ£·²¦º³¤¸´¥»²¤¹³ º³§»µ£»·§»¶£»±¡¼´¸³£¾³£»²¢¼³§¹·¤½´¢·³¢·±¡»µ£º¸¦»´¦»µ¨»·¤¹µ§¼µ£¼º¦»·¤¾¸¦»µ£º·¨¾·¥»·¦¼´£»µ§º¶£º¶§¾³¦¾·¦¾¸©»´¡ºµ¦¼¶¦¾¸§»·£¼¶§¾¶§À·©¼¸£¾¸§¾·©½·¦¼·¨¾¸¥¼·§½¸¥À·©¼´§¾º¦Á¶¥¼³§·³³£ªxw{|rwtkzYtWxkOzkSxiM~wWn]{q[zrQwrUxqW|iOxkW{gWxuQ|qS|iIugKqfKrdOqkKt`Mq`Fr_Ml]FndQqdKn`DdQDfI=dM=`KDdQ:`U=`Q?`O?`QD`W?dO?iY=`QDbQ?iQ?bM?bQ:dU?gY?n]Dnÿ`InÿvaxF»A{k®¼¨Ò ¯á¨´ä¬ºá²¸â¬»Þ¥ºß¥¶Ù²Ó­¿¥¬wkt¡ºÐ©Ô§«Ø°´×µ¹Ø¸»Ó³³Ê«¯+è'ïC½H	õ
d_i][^[ð|y$ß#ñd×Wû
 ÙåÉÃñ¼Ïã½Ã&ó ÿö´Ìÿï³ÌÎÊ­iæXçÂ¾ñ»ÈÅÃ¦*ñ#$ô+ò$ÌÇ§úÃÑúÊÔúÎÙúÒÞúÙãúÜçúÛåúàéúÝéöÓÜúÏÜúÊÙúÁÓúÀÎñ·Ææ«¿Ù¡¸Ó³Ð´×¥µÜª¹ç²¿ï¸ÄúÇÎúËÖúÂÓó°Ëì«Êö¯Íÿù·ÎÿõºÌËÃ©cåUÛÌ¾óÐÕçy)ø#&ö!%ð""é!íD¶F
ô
^^e/Ä1â#×"â/Í1&æ$ó_ØRùÁvÉ¤¦Ê¤½.Þ)(Þ$s¥{¬z¸¡ÆªÙ¦±á°»ëº¿ð¹Âò¾Äò¾Çò»Æô¹Åñ»Áò¹Åï·ÂçµÂè®¾ã¬¹Ü«¹Û«·Ù£³Ì¡¯Î¬Ë¬Æ©¾¤½±®§~o~`g[xgMu`Ol]MqYInÿ_MnqWqix]~qOtiOwkKqgHllItkOoqItuQwfq¬Æ g]qO|kMxlSwqW{`~`dg`]tWq]zbdz_w[{|Yxdf|`xYr`|i]kOt]MxfSzlQwkOtgSttWwu`{{lw£©·¦µ»¥»¸¬½»©¾½«Á½¯Â¾®Á¾ªÀ½°Ãº­Á»«Á»®Ã½ª¿»¬Ã¼¬Á»¬Â¼ªÁ»®Á»«½»¬Áº®Á»¯Áº­À»«À¸«Á¼¬¾»¨½º¨¿»«¾»«À»ª¿»©¿¼®Â»«¿»­À¹«ÁÀ­Á¾¬Á¹©¾º©À¸«¿º©¼º«¾·¬¾¸ª¾º©À¸«Á¹¨¼»¨Á¸ª¾¹©»ºª¾¹©Á¹«¾¸§¼º¦¾ºª¾¸ªÀ¹­¾»«¾º«½¹§¿»­¾·©»º¨À¹©¾º¨¼¸§½¸©¾¶¨½»¨¾¶§¾¸«½»«¿·§»¹«»»¨¼¹§º¶§»µ©½º§»·¤»¸¦½µª»µ§»·©¸·¥½³¨½µ¨½¶§½·¥¼·§¾²«½·©¾µ¥»·ª¼¶¦º·«º¶¦¾²¤»¸¤¸³¦¼´¤»·¢»·¦»µ§º¶¦¼³§··¨¼·§¹¶§»¶©»µ§¹·§º³¦½´¦¸´¥¾µ§¸¸£½²¤º³©¼µ§º¶¥·³¤·´¦»´¤¹·¥»³§º³¥¹±¥¸²§¹³£¶´¨¸²¢ºµ¢·¯¤¹³¦º²¤·²¢¸±¢¶±£¹µ£¶°£·³¤µ²¦·²£·°¡¹²¥·³§¹²¡·°£²®£·²£º²µ±£¶±§µ°¢¶°¸°£·²¸±£´®µ° ·¬¢µ² ¶° ¶¯¡°¬ µ² ´¯¤µ¬ ³®¡µ®¢³¯µ®¢µ±´¬³¯³­µ­¡·°£³®³¯´¬´®³­°­³¬µ¯¢µ«¢³«³¬¢²­²¬£³­´«´® ³¨¡¬­¢³¯³­¢¯­²®¯®°®¢²¯³°°°²° ²°¢³¯µ°³¬®±²³¶±³®¡³²¡¯³³³³°¢³­¤µ° ³³¢´±¢³®£³°¢´²¦³²¡³°¡´°£´±¢³±¤´¯¤³³ ·³§±³¢µ²¡µµ£³±¡·³¥³²£µ±¡µ³£·² ¶³¦¸´ µ³¤¶¶¨µ³¥·³¤µ²¢¹³¤µ³¨µ³¢´²¥»²£¶µ¥¸µ¦·¯¦µ¶¤¸´¥¸·¨·³¡µ¶¥»´£·³¦¸³§ºµ¢·´¥»¶§·´¦¶·§»·£¶µ¥»¸ªº¶¥¸¶§·º¦¹³¦º¶¦¹´¡¶·©¹¶¦¸¶§¹µ¥ºµ¦ºº¥·¶¥»¶¦·¸¬½¸§»º¤º¸£»º¥»¹§¼¸§½¹¨»¸¨½¹ª½·ª½»«¿»¬¼»¦»¼ª¾·¨¸·¦¼ºª¼¼«¾»©¾·¨½¹¦»¹¦º·§½¼ª»·§¿¸¨»¹ª¼¾ªÀ»«»º©¾¹¨»º®¾¾¬¿¹©½·«»¹©Àºª½¾¯¼»©¾»ª¾»«¾ºª¾»©¿¾§¾½¬¾»­»º¬¾¼ª¾»ª½¾¨¼¹­Á¼¬¿º©¾¹©¾»©¾»¬¾¼«¾»¨¾»«½¾¬¿¾­Á¾¬¿»«¾¾¬Á»ª¾¼­¾½­ÁÀ­À¾¬¿»¬À»­¾¼¬¼µ³©©{{|z|{n{d{`~{_xo[|q]z`{d~{[{wYzw[z{]zoW{w_zu`{x[zr[zoSqnSwoUxoSruStlWqlQriWodQolYon[okSf`Ii[DfYIdSOf[D`[Kb_Id_IbYO_]Qf[IddMg]Ig`Kn[Id]KfUBi]Id]IkkSnqMnÿkWuk¡µ¶¤Ë¬Û¨²ëµºíµ¿î¹¾í·Áî¶Àî´¼æ¬·Û£´Èª¹¥wx¥{³Ç©Ö¦¬â²¶ã·¸ß¹»ß¶º¢Ê!óöøþ#à#too^ªYÿ}¤ï÷ú
þ8ð0ºÐú½ÏêÃÃ(õ!Þkÿú¾Õú¾ÒúÃÑøÉÑúÆÑô¿ÉòºÆÚº¸©ÊâÄ¹øÀÌúÉÐúÐÖúÒÜúØâúÛäúâëúàêúæëºé­dî[¸á§úÌÛúÈÓøÃÏ¿ÈtÖ_Î²§Ù©¹Ù©µà«·â³¾ê´ÁôÀÈúÅÑúÌÓúÃÕú»Òú½ÓúÃÕúÇÕÿúÁÔú¾Òú·Îö¸ÌñÀÌòÆÈôÌÏÕÒ·­Û¢Ô#ñõ
öþ#Ý#A¼>Þ}iäLÑD ñ÷ùþ4ë)¶Á§¡	ù¥q·¸¡¾¦ÌªÓ±á©µé·¾ðÁÃ÷ÄÆúÃÈúÆÊùÃÈøÃÈõÁÈõÀÈõ¾Åò»Äî¹ÁêµÀé´ºå²ºÝª·Ò¨²Ó§²Ð­È ¨Å¥Ã¡º³¬{ow`q[tdYqgSodUldQlkSrx_q]wz[wqSotSwuQzxSu{[{zYu~Q{du¥{§Ã¡ qi]~wY~xY~{dfdnqng`udkni`~boni~i_zlkz[~kYwoY|t]xqYtq[|z`{w_k¤§¹¬³¾®½¿¯¾Â®ÁÃ°¿Á²ÆÁ²ÂÄ²ÄÂ±ÅÀ±ÁÂ±ÆÁ°ÃÁ±ÁÁ²ÁÀ¯ÃÁ¯ÃÁ®¾¾°ÆÀ²ÀÁ°Ã½°ÁÁ­ÁÁ¯ÃÃ³ÃÀ°ÁÀ°ÂÀ®Â¿°ÃÃ®¿¾®ÁÀ³ÂÅ¯ÂÁ¯ÁÁ¬Á¾¯Á¾°ÂÁ¯ÁÀ®Á¿¯Á¾­Á»¬ÁÀ­¿¾®Â¾°Á½¯À¿¬ÀÀ­¾Á¯¾¿³¿¾¬Á¿¯ÀÀ°Á¼¯À½¯Á¿¯¿¿¯À¿¬¿½²Ã¿±Á¿°¾¿¬Á½°¿À±Â½­¾¾°Á»­Á½¬¾¿®¿¾¯¾¾¬¾½¬¿¼¬¿½³¿¿­½¿ª½¼®½¾°Á½¯¿½¯¿½ª¾¼¨¼·¬¾»®¿»­À»­½½­»½¬¾¾°¿¹¬¾¿¬½¾®¿½¬»·­¼º¬¾¼­¿»¬½»¨¼½©¾»¯¾¹¬¾¼¬À¹­¾»¬»¸¨¾¹¬¼»¬»¼®¾¹¬¹¹«À½¬¼»®½¹­¼½¬¼»¬»º¬¾»­¼»¬¼»¬¾º®¼»¬¼¸¬½»§º¼¬¾¸¨»»®»»¬º¹ª¼¸®º»ª¹·©½¸©¾º«¸¹­¼·©»ºª¹¶¦»¸©¾¶§µ·¬¸¹©¼¶§·³¦¶·ªº¶¬»·ª¹´ª¼¹©··©¸·®»·¨··¤·µ¤¸¹§··¥·¶¨»·§·µ§¶¶¦·´£»·©·³¦µ·¥¶´§ºµ¦·³¦¸³¤³³¤µ´¤·³¢³³¥´³¢µ·¤·µ¤¶³¤¹³ªµ³¤·³¢¶´§¶´§·³¥´´¥±²¡¶³¤·³¦·³¢¶³©³³£·³¤³³¤µ®¥³³¥·´¨²²¦µ²¥´´§µ´¦¶³§´¢¬§²¨±«³ª²§®©²©²«²¨²ª²«´¨²«±©³«³¨®©²¯´©²¬³©°¬³«¶¯°¬²¬µ«´¬³ª±¬³®³¬´­³¬³«·¬µ¬´«µ¬´¬µ¨´«³«³«³«¶«·¯¶¬¶«·¬·¬·¯±ª´®·®¸®µ¯µ­·¯ ·¯ µ®¶±³¬µ°µ­¶¯º°¶® ·¬·²µ­º²¸°¡¸®·°¡¸°¹¯¸²·±¡»²¹°¹°¢µ°º®£º² ·±¢¼±·±£·³ ¹³¡º°£»²¹°·°¡·³¢¼³¡º±º±¹²¾³¡»³¡»±¡½°¦º³£º³¡»³£¼²¥½·£»²£¸µ¡¼µ¢¼¶¢¾²£º±¥»³¡º³¢»³¥»µ¥¼¶¥¼·¥¼·¢»µ¡¼´£½¸¢¾´¥¾·¢½µ¦¾³¤¾·¦¼³£½¶£¾¶¤¿·§¾³¡»·§À´¥¾·¦¾¸¤»´¦½º¥¿µ£»·¦¾´ ¾¶¦½¸¦¿´¨¾·¥½¸¥À·£¾¹¢¾³§À¶¢½¸£¾³¦¿·¢À¸ª¼¹¥¾·§Áº¤¿º§½·¤¾¹¤¿·£¾·¥¾·¤·¬¯ ¥z¡uuzqxkt_t[xU~qW{nM~kYzxY|qUxlOziQxlMunO{lQwkM|oMziQ|nUwnQ{`DzbDtgIxiIwiIq`IrWDn[DkkMn`MobDnW?iU:kM=`M:`QDfU=fY?fM=fM8fQFiU:n[DlU?gS?gK:`O=dQ:gU?kQBk_DkdDq`DolQ|l£|¬º§Ñ°ßªµç°¾í³¾ð·ÄïµÄð·Ãî³Áã¬½Ø¢·É®¹©­z¡rt§z²¢¾«Ò¡¯Ú¥°Ý­´Þ¬·ÿÉµ¬¶º{Äjõ  S½Tÿuµo«ÿÐ´±ÎÂ¬ØzùÁÇ¢ôºÑú¾ØêÂÏ(ö#äpúÇØúÇÙúÀÔ÷¾ÒúÁÐ÷¿Íï»Êí¸Èê·Ãë²ÆïµÅö¹ÊúÁÒúÇÓúÎÜúÐàúØæúßéúàíî-ù(Có=+÷(á~øÄÔÚs$ó2í)%ï±³Õ¥´Û¤·à­¾è²Áí¶Èö¾ÌúÆÐú¿Òø·Óú»ÒúÃÙúÃÕúÄØú¾Ùú»Õú»Öú·Òù¸Ðú½Îú¼ÑöÀÎðÃÍÿÖ»¸´¬¥m»lôz{kpåbhl¬iëÿÆ¬£¼³Éj÷¨±¡·z£9Ô4!æ­¸¡Ã¨Ç«Ë®Õ¡°à«»é³¾ðºÄõ¿È÷ÃËøÃÌùÃÉö¿Ëö¾Ëö¼Æð·Èï·Ãê³Âæ°½ã­»Ý«»Û¦µÐ¡±Î ¬Ë®Ç«Á£»¡²±¨xku_kQq[FrYIn`?o[Il_KqkKqkOtgIulKuqItxO{S|]U{S`b`l¨tk`|WtMlQ|t[[z[~ff~]~_tYqW{xYwdu_qUu[q`d]z`w[wbzgzWgDt`MxbMuiSwiSzgO~t[{w]~ox¡°¡´³¨º·©¼¹ª¿¼­Á¿«Ã½«Ã½¬Á»«Â¾«Ã»©Á½«Á¾¯Ã»¬Â»­À¼«Á»­Ã¼¬Áº«Â»§Á»«À½¬Ä½«¿»ªÃ¾¨Áº­Á¼¬Á¹°Ã¾©Á¼«Ã¸©Âº§Á»­À½©Á»«À»¬¾»¨Á»«À»©¿»§Â¹«Â½¨À·§Á¸¨Á·ªÁ»§¾¸©Á»©¾º©¾º©À¹¨Â¹¦À·¬Á·¦¿º©À¹¦¿¸«¾¹ª¾º¨Â·¦½½¨Á¸ªÀ¸¨Á·ª¿¶§Áº©Á¹§½¸©Á¶¥¿¹¨½·¦¾¸¨¾·©¿¸¦½·§¾·¨¾º¨À¹¨¾·¦»·§¾·¨Á¸¥¾·¦¼·§½´§¾¹©¿·¥À·¥½·¨¾³§¼·¨¾·¥½·¥¾µ¨»µ¤»µ¥¿·¦¿³§º¶¥½µ§¾·¥¾¶¦º³¦¾³£»·£º¹¢¾·¥½µ¨¼³©¾µ§½·¤»²¥¼¶§½µ§½²¤»³©»·¤»·¥·³§¹µ¨¸¶¡¹´¤¼³£»²£½±¥¼´£»µ¦º³¥º¶£»¶¢»²§º²¤··£½²§º³£¸°¹¯¦¹²¢¸±¡·³£·²£·±¤·®¢»°£º±£¸³¡º°£¸²¢·®¡º°¢·° »±¡¶³¢¸°¸°¶®¢¸®·° ·®¡¶¬¶±£·­£¶±¡¸®·­¢¶®¸¯ µ¬£·²·¬·¬·¬£¸¯¶°´¬¶¬¡³° ³®¡¸­¡·®·¯¢´®¸¯µ®³®³°¶­¶«µ¯´¬¡´­´¯³­ µ¬·¯³¬ µ­¡·§§¬°¯ ³¯®¯³­±­ ³¯¤³¯´¯±¬±¯±¯¡²³³° ±²±¯£®¯¢¶³£³®±®¡³®¢³­¡²´¡³±´³¡±³¤´³³°¤²¯±´£¶±³³¡³± µ³¢³²¢´®¡³³ µ±£³³¥¹°¡µ³ ³°£µ±¢µ²¡¸®´´£µ³¢³´§·² µµ¥¶³¦¶´¶°¤º³ µ²£³³¤³µ ·°¤·µ¡´³¥·´§¸µ¥·³¢»´¥¶³¦º·£º²¢´´£·¶¤·´¤¶³¦»´¥¸³§º´§¸µ£¹²£ºµ¥·¹§»´§»¶·¶¦º³¥··§¸³©¸·¢¸·¨»·¤·µ§¹º¦ºº©º³¤··¡»¶§¹·¤¸º¦¼·§»·§º¶©º·§»º¤»·¨º´©»¸¦¸¹¨·¶©»º¨»»¥»»ª»»§»º¨»¸§¼¸¬¿»©¿»§»¸§»º¨¹ºª¼»¨½ºª¾º¬¼»¬»·©»·«¼º«¼º¦¾»¨¼·«¾»«»¾¬½»©½º©¿ºª½ºª½¼®»»¨¼¼©¾¼¬½¾ªÁº«»¸©¼¾¬À»®½»¨¿»§À¼ª¾½¬»»¬¿»ªÀ¼¬Á½©¾»¬À»¬¾¾¬¾¼¯Á¹ª¼½¬¿¼¬À¿«Á»¨»¼©¿¾¬¿¾¬½¾©À½®¿¹¨·´°¢¦¢{ul~b~b|zb{{]|wYz_f~|b|oYwnYxrW|w]zuWwnU{r[|o[xt[zrY{iStqQtkWwuYqnYtkUqdQn`SilYodWogQo]Qg`QfWK`WF`SMb[F_[KgYFd]BbWSf_KldOibQg_M`UBd[K`UMg]Ii`QliOlkMllSuzf~{¬ºÉ«Ü©µè²ºï¸Ãó¹ÅöÀÌõ¾Çö¿Èõ¼Èê³Áå®¼à©·Ö²Ã§©~  {¨|­·Ã¦Æ«Ð¤®ÿÝ«³ÿâ±·½½^ÛNË©¨ºöøøÿ`éOÿúÈÕÑÍ¶ièZçÉÈúÃ×úÆÜòÊÖxçjµß¢úÏÜúÊÜúÆÕúÃÓúÂÐ÷ÂËô¾Èñ¼Çí»Áî¸Äò»ÇúÁËúÉÐúÌÖúÓÝú×àúàæúãëÖëÍQöL¼è¯ðßÝ¥ã*÷%áo(õ µÌà·¹bÜR'ð Ãµ á­¹å¶¼ë·Áò»ÈùÁÈúÄÒúÁÔúÀÒú¿ÕúÀÓúÃØúÆÙúÃÛú½×úºÕú¾ÔúÅÓúÇØúÉØúÆÐÿöÀÍÿê¼ÃÀ¼ ]ÚMÅ¦¥È®r¿` ë#ì!ïÿÜ¦¯ÿÌ¢¬¥­PÑE®³¤DÑ;¡Á¢Ë¬×¢®Ü§²Ü¨ºà­·é±¼ï¸ÂöÁÊúÅÌúÇÊúÆÍúÆÊúÅÍúÅÌøÁÈø¿Êö»Æí¹Áïµ¿é²¼ã¯¹Þ¬¶Ù¨´Ð¦¯Ï¤¬Ì¢ªÆ§¾ ºµª¨wgx_xfSq]UofQn_UnlUkuUonSuoYu{Yxizn o wlgqo¡l¦g©x«w¤r]{]wUwgfionkifw`~bix[x`~~_wfklgg|iqbtSxoYur]xn[ut[unWzx`{~dz³¥®¸­¸Á®½¾¯½¾®¿¿³ÃÇ°ÃÄ³ÁÁ±ÃÄ¬ÃÁ°Á¿³ÂÁ³Á¿®ÃÁ®ÀÁ°Ã¾¯ÂÀ°ÃÁ³ÂÁ¯ÃÃ¯ÀÁ±Ã¿¯À¿¯Â¿­Ã¿°ÂÄ¯ÃÀ²ÅÁ®¿¾²¼À¬Â¿±¾Ã³À¾²ÁÂ¯Â¾°ÁÁ±¾À°À¾±¿Á¯¿À®¿»­ÁÀ³ÁÁ°À¼¯¿¾®ÀÀ¯Á¾­Á¿±¿¿®¾¿¬¿Á¯Á¼¯Á¾¬¾À¯À¾±À¾±¿¿®Á¿²¿¿¯¿½¬À¾°¾»±À¾¬¾¿¬¾½®ÀÁ¬À¼¬¾¼®¿»¬À½¬Á»®¾¼¬¼»¯¾¼±½»ª¿½®Á»­¾½¬½»­»¼¬¿»¨½»­½½¬¾»¬»½­½»®¿¼¬»¾¬¿º°¼¼¯¾»¬»»­¾¸­½¼¬»¾­¼º«¾»¬º»«¼¹°¿º¬»»©»»¬¾»¬»»«»·­¾º¬¹·«»»ª¾º©º»ª¼·¬¼½²¼»¬½¼¬¾º©½»ª¾µ©»»©º»«¼»¬º¹¬¹º©»»ª»»¬¼¼«»·¥»»«»»§»·¦º·¬ºº¬ºº¬»·­»·¨¹¹«¼·§¸µ§´¶§¹¸­¹·¨»¶¨·¶ª»´§¹·§º¶¨¹µ¬¶·£¹·¨¹¹¦¶¶§¹·©·³¥¹¶¥»µ¤µ³§·¹¦¹³¦·±©¶µ¦¸µ¥´³§··¥··¦·³¨º³¥··¥¶µ¤¶µ¨´³¤´µ£¶³¨µ´¡¶³§³±¥µ´¦´´¥·³§¶³¤µ·¤¶³¦¶³¥·³¤·°¥¶³ ³³¡³³§¶²¥·³¤µ²©µ³¤¶´¦¶´¤µ²§´±¥³µ¡´³¦²£«§²¥±§¯§¯¬±¨²¬±«²­²¨±©²©°©±ª³§²¨²«°¨®«²ª²©²§®«´¬³®²¬±«³ª±«°«µ¬³¬²­³ª³¬°§´¬³®´¬µ¬´«²¬±®·«µ¬µ¬·®²®¶«³©³¬ µ¬´®²­²¬¶°µ«¶¬´¯·®·¯¸¬µ²¸¯¸®¡·°·¯ ¸¬·®¡µ­¶¯¢¶¯·¬µ®¹° ·¯¸²¸®¶¯¢»¯·°·°·´·°·¯¸®¡º²º³µ®¸¯¸²£¸¯£¹³º±·²¢¸³£·²¢·­ º® ¸³½µ¢·±¢º´¢¹³¡º²¢»³¡¹µ£»µ¥»´¡¹³¡»µ¦¾±¦»´¤¾³£º³¡»²£º´£»³¤»³§¼µ¤»³¥¼¶£½³¤¾³¦»¶ ¾µ¦¾µ¢½µ¤ºµ¡¼µ¥¼µ¥½´¥º²£¾´ º·£¼µ£½·§¼·¡»µ¥¾¶¢¾´£½´¥¾µ¥»¶¤¿»£¾µ£¾µ£¾¸¥º·¦½µ¡¿¸¢¾´§Á¸£½µ£»¹ª¾·¡¾·¦Á¸§¾¸§¾º©¾µ¡¾·§À¸¦º·¥¾µ ·«®¦¢zqddwYq[tWtQ~lUr[|]~qW{gQxlQufIwiMziQxnSwgSzkQzkMwfMtdIxdKtiOtgMtgDu`Io`Do[:kUIl`Dk]DkUIkU?iO?dO:dM:dQ:dO:bO=_I:fO=dY=f]?g_BfO?iM5gM:bS=kO=dY:i_?n`BndOx`x«|¶¤Ð®Ý§¸ç²»íµÁîµÄó»Èó¾Êô½Èó¸Éé´Äç±Áç¬¾à¢¸Ã«³{¤¤x¡¢wªt¯|¡¬¢²¤²©·¬ÿÎ±Ð¢²Ô£·×©·Ùª»Ø°ºË¼¨¹Å¶É¿Ðÿó¿Ïù¸Ïú¾Òø¹Óú»Ôú¹Ôú¸Øú»ÙøÁÙúÂÙúÇÛúÃÖúÁÓúÁÐù¼Ðö¿Îð»Êì·ÅìµÄì³Çî³Æõ»ÍúÁÐúÆÕúÑÛúÖáúÛçúáëøâéÚèÍîáÞúÕãgë]?ñ9Ü|1ò(Í¿«ë¯ÃhÖWø
¨¹Û£·â¯¸ê³ÀîºÄòºÈúÂÎú¾Óú»Òú½Óú¼Øú½Õú»Õú·Öú¶Ðú³Ôú±Óú³Òú¸ÒúºÕù½ÑõºÍÿø¶Îù¸ÏðºÊç·Âí³ÀÖ©¶Ä±¬¨º{²«Æ¬ÿ¼©¾¦¾¥µ¡·{ ´z¡®}²~ »£Ã­Ò­àª·ä®»æ­¾ç²¾ê·Áñ·Æ÷¾ÉùÃÌúÁÒúÅÐúÂÏ÷¿Ìú½Íö¾Êõ¾Èñ·Æï¹Ãè³Âå¬½Ý©ºÙ£¶Õ¤±Ò²ÊªÄ©Á¢»£µ®©¡xk~_oQzdMtUDnYDt]IifFqdDqkKqtSx~dl§xªu¨olln¤r©o°q·»¬q]wUoQwYb|`db|]{]uYqQ{r_x]qW~qU~qU~r]fizbt[wd]x`wY|`IxdMwgItgOziUzqSwr[xkz~ª«µ¥µ»«¼»§À»ª¿¼¬Ã¾¬Ã»©Á»«ÄºªÁ»§À¹¬½»ªÃ»®Ã¼¬Ã»¬Ãº©Ä»ªÁ»¬Ã¹¬Á»ªÁ¼©Ã»¨Ã»¨Á»©Á¸ªÁ»®Á»¬¾¹¬Áº§¿·¤À»¬À»«Á»«Á»©Á¼ª¾½¨Á¹¨Á»ªÀ»¬À¹¨Á·¬Á»¬½»ª¿»§Áº©¾¸ª¾·ª¾º©Á¹¥À¸ª¼·ªÀºª¾º©½¸§Á·¨¾¸©¾º§À»§À¸ª¾·§¾¸¨Â¸©Á¹¤¾»©¾¶©¾¸¥¾¹©À¸ªÁ·¦Áº¬¾·¥¼·ªÀ»¨¾¸¥¾·ª½·§À·¥½´¦»¸§½³©»·§½¶©¾·¥½º§¼´§¾º«¾´§¿µ§½¶¥¾µ§¾µ§º·¦¾´§¼´¦½·¥»¶ª»·¥¾µ§¼µ§¿¶§¾¶¥»·¦¾µ¨»¶§¼´£»³¦½´£º·¢¾·£º³¦»·¦»·§¼¶§»³§»µ¤»´¥¼¶¢¹´§¼³¥»µ¤»³¥½³£¹´¥º·§»³§½³£º²¤¹³ ¸³¤¶µ¥º²£¹´¦º°£»®£º³ ¹³ ¶°¢·±¡¸³¡·´¥µ²¡º²·®¡¹´¤¸±¸°¡·²·°¢·°£µ°¡·°·²¡·°µ³¦¶¯ ¶­ ·°µ±¢¸°¡·¯¶¯ ¸° ¶­·­¡·® µ­ ´®³°¹¯¢µ­µ®²­¡³®¶­¶®¶³µ®µ¯´®¡·° ´­ ´®·®±° ·° ¶¬³ª·­±¬²­ µ­±®µ® µ¬´®µ¯²©ª®³¬²¯°­¢²­³°®¬ ³¬ ±²²°°®±­²°°°´¬±¬¢µ±µ°±®°­ ¯³³²¤²²´² ³¯¦´®¢²®¢³®¡³³¢³±¢´­³°¡µµ ³¯¡µ¯¡³® ³³¤·³ ±³¢³´ ³³£³²¤µ²¢µ²´²¢´®¦´²¢³³¤´² ³²¤²®¡´³¢³± ³´¢·³¢³´£¶³¥¶³¤³³¥¶¶¡¶³¤·´¥·µ¢·´§¶µ¤µµ¡´µ¥¶³¥¸¶¦¶³£·³¡µµ¤·¶¦¸¶¥¸¶¦·´¥¶´¤¸¶¦·¶§¸µ¡º´¢´¶©º¶¡·¶¥·µ¦»¶¤»µ¦·¸¦·´§ºµ§¹¶¨¸µ¦¶¶¨¸¶¤¶¶¨¸³£·¶¨ºµ§º³¤·µ¤»¶ª¶¸«»¶©»·¦¸·ª·¾§»·«¹·©º¹¦¹¹ªº·¦º»¨¹º®»¹©·»ª»¹©ºº¦¹»«¾»¬»·ª½¼¬¼¹«½¶¨¼¸¬¼¹§»¸©¾»¬·»«¾¼¨»¹ª¾¼©½¹©»·­¿¹§»»©¼·¬½¼¬»¼©¼¼¯¼º©¾¹§»¾¬½¸¬¾¼«½¼¦¼»«¾»ª½º¬¿»©À»«½»ª½½§¾»ª¿Á¨»½®¿»¬¼¾¬¿º­¾»¨¿¾ª»½¬¼½¬¾»¨¹½¬½»¦·´® §¡¤¢¢¢uqozbz_~{`~|_uY{x_fw{`wr[wu[unSwu_{qYuoYwu[uz_ut[woUqlQuoSqnSuxUtoQniSklOidOldSfkOnfQi]Mi[Ob_MdUK]YIb[FbYI`WI_UF`[M`[I_`IgkOb[DiSKiWFb]Kg[MifMkiQnkSqnbxu¦³ÈªÙ¦±ä¯»î³¼ò»ÃöÀÅ÷ÆÌúÆÊúÅÍøÂÊô¼ÇõºÆô»Âé±ºÖ³Ã¬´£´¡´ ¼ ¹¥¾¤Ä©Ê«É¬Ê°Ì³Ï¡³Ý¨¶Ý¬¶à°½ßµ½â¸ÂñµÆöµÆõ¹Ìö·Ìù·Ìú·Ðú¸ÔúºÎúºÕú¹Õú»×úÄ×úÇÛúÈÙúÈÙúÅÖúÊÑúÆÍøÁÍôÂÈò¼Æð»Çò¼Æõ¾ÇúÁÌúÊÒúÍÕúÚÜúÛãúâéúèêúéîúêëúäééûÌÛµôÌÏWëI>î1nÝY÷ôÆ²¦â®»è¯¸ì¹ÁõÁÄùÃÊúÅÎúÅÒúÇÔúÆÕúÈÓúÃÕú¾Öú½Óú·Òú¸Ñú·Ôú·Óú»ÏúºÐúµÒ÷±Ìð°Éó¸Èï½ÆèºÁí¼Ãã·ÂÞ§»Ì²½¬»ª¾ªÁ¤»¦·¤·¥¾£Á¦¼¡Á¨Â¦Á§Ê­Ò¡³à¬³ì´»ï¼¾óÀÃó¿ÅõÂÅ÷ÃÊúÇÌúÊÐúÊÍúËÏúÉÎúÉÐúÂÌùÁÌùÃÊô¾Æð¹Âî¹Áë³¾è²·à®·Ú«³Ó¦®Î¤¬È§ÇÀ¢¾ ¯°¦ziz]{oUtdYlfOogQinUkoSnu[nb|z®º·¶|«u§u¬»Ë¦Ò¨Ô¬Ò¨Á¢¦lbxW|`zkknoidxbz_|~`{xbz`|w]|z`||bqtk~fi|zdnkrStkYznWrkWuu[wtYx|fzk¡© §¹¦³¼°¼À¬¾¿®¼Á²ÁÁ­ÂÂ°À¿³ÂÁ°Ã¿­ÀÁ±¿Á®Á¾®ÁÀ¯ÁÀ¯¿Â­ÀÁ±ÂÁ±ÃÀ±ÄÁ¯Á¿®ÃÁ®Á¿¬½¾¬ÁÁ³ÁÀ®Á½²Á¼°¿¾¬ÀÂ®¾Á±À¿®¿Á°ÁÁ®ÀÁ°ÁÁ¯ÃÀ­Á¿¯¾À°¿¾¯ÁÁ­½Á®¿¾¬À¾¯¿¿±»Á¬¿¿­¾¾¯¾¼¬Á¾®¾¾²Á¾¯Â½¬¿¾®ÁÀ®Ã¾²¾¾¬¾¿°Á¾°¿¿¬Á¾¬½¾®Á¾°ÁÀ­½½¯½¾¯¾¾²À¾¬¿¾¬¿¾®À½¬¾º¯¾À®½½¬Á¾¬¼»¬¿½­¼»¬»½®½·¨»»¬¾¼¬¿½¬º»ª½º­¿»®¾¼­¾»¬½¼­¹»¬¼¼¯ºº©¼º¬½º©»¹¬ºº«¾»©»¹­½»©»¹¦¼»«¼¹ª½»©¼º¨»ºª¼»²»¹§¼»ª»·ª¹º¬¾¼¬¼¹ª»¸«»»¬¼»©»»ª»»§º»¬¾¼®¼¸ª»¹©»»¨½·ª¹·¬¼»ª·¹«·¹¬¹¸¤¹·©·¸©»·ª¸¸¬·»¥¸º¨º¹¦»µ¨¹´©··©¹µ¨»¹¨·³§º·¦º¶§¹³ª··¤·¶¬º´¨¶µª¶µ¦¶´§¶¶¨¹·¨»³§·º¥³´«·¶§··¥³³ª¶µ©¹·¤·µ§·²¦·³§³³¤´³¦¶³¨µµ¡·²¦¶µ£³·§±¶§´±¥µ³§³µ¢µ³§¶·§¸°¦¶´¤¶³¤´³¢´³¤µ±¢µ²¥µ²¥¶³£³³¢´²¢³±£³²¥°²§µ³¦²³£·³©¶³¦³²§³³¥³¡©¦¬§­¨²«¬©³ª±¨³©²©¬ª®¦²«³¨°¨°ª±«±«°§¬«²©³«³ª®«°¬±«³ª°«²©²©°¬³«±¬³«²¬¡³­²¬²¬´«¯«²« ¶­²ª²«³¬µ«´¬³­¡¶«²¬´«²¯ ²ªµ«³¬³®¶¬³­³­²­¶®´¯µ­·®µ¬·¬ µ­·®´¯·°¡·¯µ²´¬ µ°µ±¢·®·³·°¡¸­¡¹°¶®¡·² ¸°¡·³ ¸±¢¹²µ²¡¸¯£¶±¡·¯¢¸­¤¹±¢»³ ¶¯¡¸²¡·® ¶²¥¹°£¸²¸²¹¬£¹±£¸°¡¸¶£¸³£¹²£º±¡¹²¢»³¤¹³¥º³¤¹°¥»±£¼¯º³¥ºµ£º¶¡¼´£ºµ¤»³¡»´¥»´£»µ º´£½µ¤¾·¥»³¢º´ª¾µ©»´£½³§¹³¦¾´©½´£¼·¦¼·¦½¶¥º³¦¾¸§»·¢½¶¤½³¨¾¶£½´§¼¶¨¾·£¾³§¾·¦¼´§¾´¥¼µ¦½¶¨¼·¢¾µ£¼´¦½³¢»µ¦»·§»µ©½¹£¾º¦¾¸¥»·©¾¸§¾¶§»±³­¬ ¥¤¢zxgz`qY~tY~wW~nWn[zqYzq[|kOulW{kQukQxuQziS{fKwgMtiMugIt`Mt[Kt`IugMuiMr`IodIn_InYIkWFkYKkWDgMFfUB`M?dQ?_I8iM=_Q:bMB`K?bI?dQ?bS=d]BfODfK8`K=fM=bMBgYBg[Fi[Bnn]|i¢z°Ç©Ú¥³âª»è²¿ð»Æô¾ÈöÃÊøÃÌúÆÐù¿ÍùÀÌö»Èï·Äë°Àà§¸Ò²½ª·¨¸¦º¤¾¨ÃªÌ«Ï¬Ì°Î®ÑµØ¸Ý¸ÙºØ»ßºß¥ÁëªÄó­Çó°Èô®Ìô¬Ëõ¯Ì÷¬Ðõ®Ñ÷°Î÷³Ñú¼ÕúÆÕúÈ×úÈØúÃÕúÆÓúÇÎúÄÐøÁËò»Èî·Åî¸Äï¹Æô¸È÷½ÈúÄÓúÊÕúÎÛúÛâúÝåúâêúãêúáìëÿÈÜ²úÍÚúÈÓôÄÌxÝa)ð#RßD/ì'Ç©§×¤¶ã®»éµÀï»Äõ¼ÇùÃÌúÇÒúÇÕúÇÕúÈÖúÆØú¾×ú¾Õú¶Ñú³ÓøµÐø²Ðø²Ð÷²Îö´Ìô¬Êï­Éð­Èë¦ÁàÀà¦¿Û¥½Ó³Ò³Ã­º«·¨À«Ã«À¤¸¥µ¦Â¨Á©Á©Æ«Ï°ÐµÛ£·ä°»ì·Ãñ»Âò¾ÈôÁÇùÃÌúÄÌúÃÎúÅÍúÇÏúÆÎúÆÎúÂÊùÂÊùÀËô»Æñ¹ÈìµÃé³Áã±»Þ¬¹Ü«¶Ö¤±Ð°É¬Ã¨À º²¯¤|q`tY|lSq`Ko[Ir]MllIliMruUtd|r©º·±{ªt¦q¯Æ¤Ø°ß¡²Û²Ï­Å¡£lWqQ||``z]bdd{[nWoW|qYtYwQ|nS{rY|qW~xid{`w`z_u[xbggQzbOu`KwfItfOxkUzlU~u]x¡¬¬µ¤µ»©½»©¾¹«Á½©Ã¹«À¹«Â¼¬¿»§Á¼«Á¼«Á»ªÁº¬¾½©¾»«ÃºªÁ»«Á»«Ã»¬Á»¬Àº«Á¸§À»«½¹«À¼«À¹¬¿ºªÁ¸¨À»¦Àº­À»¬Â»ª¿¸§Á»¨¾¼«Áº©Á½«Á¹ª¿»¬¾¹¬À»«¾º©À¹¨Á»¨¿·¬¾·¨¿»©Á»¬¾·¬¼¸ªÀ»§Á·«¾»§À¸§¾½©Á·«¿·©¾¸©À¹©¾·ª½¶«Á¸©¼·©¾·©À¹©¾º¬¾·¨»¸ª¿·ª½µª¼·©½·§¼·§¾·«½µ¥¼¹§½³¤¾´©½¶¥»¶©»¶¥»·¥»¶ª»µ©½´¦»·§»¶¦»·©»µ¥»·ªÁ¶¨¾µ§¼¶¥½¶¥»·¤»µ¦º´¦»³¤»¶§»µ§·¶¦¼³¥º²§¹¸¥¹¶£·³£¹¶¤»µ§·µ¥½´¥¹·§½³§º¶¨¹³¨·µ¥·³¤º²¤¹µ¤¹µ¦»²¥·´¦¸³»·§·³¨»²¨¹°¥µ³¦¹³§º±¤·²¤·²£¶±¤º°¥·¯ º²£¸³¤¸°¡¸°¤·²§¹³£¹²£·­ ¸°¥¸°£·²¢·®¡µ¬¡´²£¹±£¶¯¢·±£·®µ®¢·±¤·³¡¸°³° ³­¡³°£·¯ µ¯¡·°£¶°¢µ¬£µ®¶¬±®¡¸®¡¶°´®³­£µ­¶®¡µ¯¢µ®¡´®¡³¬´­¡¸±¢µ¬¡³­´©µ¬£¶¬³¬²©¢³«¢´¬µ°¢µ§¯­¶®£±«¡²® ²¬´¢¬¬³°³­¯¯­® ´®³®¤®®¤³¯ ¯®®¬¯®³±±°¤²° ²° ³´ ±®¡²²±±¢³°¡³²¡°¯¢±°¡¶²¤±°²³³±¢³³¥µ±¡²±³²¡³± ´³¡¶² ¶®¢²³¢³²£³±´¯¡³¯±° ²±¤·°£´³´·¡µ±¡µ¯¡²·¡·¯¤·±¤´µ¢²± µµ¤³³¤±°¦µ´¥¶³¤´¯¡¶µ¡³´¤¶³¥·¶ ³·¥¸µ¨·²¤³´¤¸³¤´´¥¹µ¥¶±¦¸³£µµ¢µµ¤µ´ ¶²¥´¶¥·³£µµ£·µ§·µ¡º¶£·³£»³©·¶£¸·¨·¶¤·µ§º¹¨¹¶¨»µ¨¸·ªµµ¨¹·¨»¶¥¹µ¨º·§º·¦»¹¥µ·¨¼¸§º·¨»·ª¼¹¦¹¶¨»·¥¸¹¨¹µ§¸ºª»¸¦º¹ª½µ¨»·©»»¥½¹«º·§º¹©»¶¦¾»©»·¬½ºª»¹©¼¸¨»¹§¾¼­¼»¬»»¬¾º«»·¨¼»ª½¸¨½»ªºº¬º¼©¼»¨¾¸¬¼º¬¾»¬¼¹¦½¸©¿»©¼º©½»ª¼¾«¼»¬¿¼¬Àº­º»©¾¾¬»¾«¿º°¾»«»½­Á½«¾»¬¿»¬¾¼¬½º¬¾¼¬¾¾ª¿»¬½»©¾»¬»µ«º¹¢¶²¢¯ª¨¡¢§{nk~`d~`~x`z{b~|bzw`{x[uuYzq[toWzx`xq[|qWoo[rtUuqUxlSriSrnSrrWrwWtoSqoUqlSl]OobMi`Od`KgbMf`O][I`_K`YKbWF`YB`SF`[IbWF`SDd[MidIb_KbWIbWDbYM_WOifObfOlbOl{bq¨» ×¥¬ã®´ë¯¾ï¸Ãõ¿Ç÷ÁËúÅÎúÅÎúÊÒúÊÑúÃÑú¿Ìù¾Ê÷ºÉï³Ãå¨»Ó±È²Å­Æ¨Ê®Ó°Ø¢³Ø¥´Ú¢·Ü¤µáªºæª»ëªÀë­Àè¨¿é§Ãî¯Åñ²Çö®È÷³Ëô³Êõ¬Èõ¬Èô­Ðö³Îú´Îú¾ÓúÊÙúÎÚúÑÜúÌÛúÌÓúÌÔúÐÑúÊÐúÆÎùÂÉõ¾Åñ¸Æñ¼Èö¾ÊúÂËúÈÒúÎÖúÙÝúÜãúäéúåíÿõ{ÿèÇÞ±Ý×ÄìËÆuäcªÒ¹Ç3î*gØTÝ©¶á¬µç³¼ì»¾ó¾ÁøÁÈúÅÌúÈÐúÍÖúÏØúÎÖúÏÛúÊÛúÈÚú¿ÕúºÓú¹Òú¸ÐúµÒú¼Ïú·Ðú·ÍöµÈõ³Èó¯Åì¬ÅæªÃç¤¿ã¨¾â»Ù¶Î°Ì¯Ì«Î®Ï­Æ¬È¬Ê¬Î¯Ó³Û¢´ä¬ºè¬»ê´Áñ»ÁôÀÆ÷ÁÇùÆÉúÆÎúÊÍúÌËúÌÒúËÒúÎÐúÉÒúÇÏúÈÏúÆÐúÃÊ÷ÀÇö»Æò»Àï·Áë³¼â³¸ß­¸à¬²Ô£°Î¡¬Æ ¨Ä Á¢»±«§|l|`~q]un[qfQoiOiuWkuWw]ui||³¾Á¼µ®{¼£Ö¤¬è«·ìªºã¡¶Ý®Ì¥¥rb[zkfffnl~bu[{d`~{f{z_|xb|z_~z`|{llkfi~b{llx]ziWulSulUouUzr[wu_{~i~u¬ ©¸«¶½¯¼À®½¿®½¾®ÁÁ±ÁÂ¬¼¾¬Á¿¬Ã¿²Â¿­Â¿³¿Á³ÁÁ®Ã¼¬À¿³ÂÁ²ÀÁ­Â¾¯ÁÁ±Á¿­ÃÀ¬Á¾­Á¿¯ÀÁ°ÂÀ¯ÁÀ®¿¿°¾À¬ÁÁ³Á¾¬ÁÀ®ÁÁ³ÃÀ°ÃÃ°Â¾°ÁÀ³¼¿°¾À¬Á¼­¿À¯¾À±À»¬ÂÀ®¿¿®¾»¬½¾¬¿¿¬ÀÁ®¿À®¼¾®À¾®¾¼¯Á¿¬Á¾¬½¾¯¿¿¯ÁÀ°Á»°¿½­½¿°¾¿±À¿±¾¼«ÁÀ®À½®½¾®¼¾¬¾¿­¾½®¾»¬¾»®Â»®À»­¿¾¬»¹¨¼¼©¼½¯¾¼­»»©¾½­»¿¬»¼«¼»¬»»ª»¼¬¾º¨¼º«º¹«¼¼¨¼¼©»¹«»¸¯»½«¼»¬¼¹¬½»ª¼¼ª¹¹¬»»©»½¬½·®ºº«»¹¨º½¬½»­»¼¨ºº¬ºº¨»»©»»¬¸·©»¸¨º»¬¼º¬º¸§º¹©º½­½»¦·¹­¹ºª¾¶«º·ª¹·©¹º©º¹¨¸¹¬¹¸¬¹¹©¹¸§»·¨»µª··¬¹¸¦··§¹¸¨»·¨·¶¨¸¶©¸¶ª¶¶§¹¸¨·µ§¹·¦·¹§·µ¬·µ¦·´¥¸µ¥¹·¤·´¦¹³¡³·¨¸µ«¶·¨·³¦¶º¨··¥³¶§¶±¤³²¤µµ§µ±¥³³§¹¶§·µ§²¶§³³¥·µ¤·µ©¶°¡µ²¦´³¥³³¤¶µ¢³³¡¶³¤³²¥´³¥³³¡¶³¢·²§µ³¥³²¡µ³§´°¤²³£³³¦´´¥³³¦µ´¦±³£±¯¥³³¨³±¢¶¤©¦®©®©¯©¬«®«®©³©¯§±©¯©®§±ª­§°¬²¬°§®«­©®¬¯«±©®¨¯©°©´«®«±©®ª²ª±ª²­³®°ª²§°®³¬´ª±®³©²©³©±©³«³©²¨²­³ª°«´«µ­³¬²¬³«³®´°²®´­³°µ¬¢¶¯³®·©·®´°µ¬·­µ¬³²µ­µ®·®£·¬·­µ­µ±¶¯¡¹° ¸­¡µ¬µ­·°¡¶¯·°·®¡·® ·¯£·®¸±£·±µ¯¸°¢¶°¸°¸²¸°§·±¡¸¯¶³¢¹±¡º²¸µ¡·²£¸²¤»¯¤·± ·³¤¸³¤·²£¶³£¸µ¢·´¡¹± ¹³¤»±¢¸³¡»³£»°¸³£»²ºµ¡·¶¡»·¦»°¢¹¶¢º³£··£»°¥¼¶¦¼³¡»µ§º¶¥¹´£»µ«»·§¼µ¥½µ¦¸²£»·£»´¤º±¥½µ§»·£»·¢½¶£¾´§¹¶¥½µ£¾µ¥¼µ¦»»¥¾¶©º´§¾·£À´£¾·ª¾·¦½·§¼µ¦½º§À·¨»¸¥¿·¹³¢¸µµ¨®ª©¢tqgw_o]w[x[t[|rY|t[wlQwiQwkOtfKtkKrnStkSzlUwlOxdOtlMrdKo`Kl`MrtO{nSolMrdIndMqSFgU?gWDf[MgW?dQ:`IBdO=`Q:]M?_M?[I=_D=[I=`D=bO?`U?dQD`S?`ODdI8dQDd]BdWIiWIrr_~l¦¿¥Ò¢¯Ü©µç°¾ì·Áï¸Äò¾É÷¾ÎúÃËúÄÒúÆÓúÇÏúÁÎ÷¾Ìö»Èñ³Äé¯Áà¡»Ø¡·Ð°Î®Ì²Î±Ô²Ö³Ó´Û¸Þ¦½àª¼æ¬¾æ©¾æ¥Áè¥Àè§Àê«Áî©Äï¦Æí¤Çì¦Çí§Éó­Í÷°ÏúºÔúÆÓúÍ×úÏØúÎÙúËÙúÉÒúÈÔúÈÒúÈÏöÁËó»Çï·Åï·ÆðºÇð»Ê÷¾ÌúÆÑúÊÖúÐÙúÛßúÞæÿ·ë©ÿüüû`ìTìÊÉØ~.ò%$ôBè6Ø«³Ü£·Ü¦´á¬ºç¶»í·Ãô½ÅúÃËúÇÎúÎÓúÌÖúÌÖúÊØúÈÛúÅØúÃÕú¾Øú¹Òù·Òú³Ï÷¯Í÷³Îö°Ìö³Èò±Èð®Åí«Ãç«Áæ¬Âà§½Ý¥½Û·Ö¸Ó²ÐµÐ°ÏµÎ¯Ë®Î³×·ß¥¸á«»ë³ÁìµÁð¸Áñ½ÅöÀÉøÀÈùÁÊùÅÎúÆÏúÇÒúÈÒúÈÒúÈÑúÈÐùÄÐøÇÌúÁÎ÷ÁÊö¸ÈñºÄï¶Áè±Àå°»ß¬µÝ¦¸Ö¨²Ï«Í¦Â¦½¢¹²©¦¡zqg|u]{fQrdFkbOn_InkDnnMr|Yx]t°¾¿·­u¬t»£Û§²í«»é¨»å¨·Ý°Á¡]tUuY|t]_`z`iduWqStYz{Yo]|wY~nQ{oW~oUzwddft`xbzdwfzzbqY{dSxfIwgOndQrgSwqWxr[xdo£¥®¥°¶¤·»«À¹§¾¹¨Â½¬¿ºªÂ¹ª¾»¬¿º«À»ª¾¹«À·«Á»ª¿»­¿»§Àº©¿¹¬Á¹ª¾»«À»ª¾»©Á¹ªÃ»ªÁ·©¾º¬À»­½º­À»¨¾»¬¾»ª¾»«»º«À»¨¼º«¿»©Á¹¨À¸¬Á»©Á»ª¿¹§»¹©¼º©¾·ª½¸©¿·¨¾º§¾»©¿·ª¾·¨¾·«¾»«¼´ªÀ¸«¾¹§¾¸«À¸ª¼ºªÁ·©À·©»¹¨½ºª¾ºª½¶§½¸©¾·§¼¸©¼¹¥»µ©»¶§½·«½»§½¸ª»¶§»¸¦½´©¾µ§»µª¼¸¦º·¨¹´¦½·¦»ºª½¸¥º·¨½·¨½¶¦º¸§º·§º³¦¼·¥»µ¦¸¶§»´¦»¶¦¹´¦¹·§»·¤¸µ¨¹µ¥º³¦»´¥»µ¥¹¸¤¹³§»²§»°¦¸´§¸·£¸³¤»·£¹±¥·´¤¹³£¹´¥º·¦¸²¦µ²¦¹´¨½µ¤¶²¥·³¤·³¦»²¤·±¤·±£·°¢º³£¹²¦¸³¡·°¥º²£¹°£µ³¤µ²¢¶³¡·±¢º³£·´£¸³¡·²£·²¡º±£¶°¢µ®³°¡µ²¢·° µ®£µ­£·­¡·® ´­£´°¶­£³®·¯¤¶¬£³® ³®¡µ®¤·¯£³°¡´²³®µ®¡°®¶«¡·®£²®¡¶­µ¬±¬µ¯³­µ¬²¬²®¢³¬³¯ ³¨³¬°¬²¬³®³¬²¬¡¶¬¡µ±¡²«°® ·²¡²® °¬¡±«³©§¬²­®¬¢³­¯¯ °¬³­¢³¬£±®¢³¯¡°¯®­³¯¡°¯²®¡±­ ³­¢³­³­³®¢¯¯°²³±³«¡´¬³±³®®² ²²³­¡²®¢±±£±­ ³¯£³¯¢´°¢°³¢±³¤µ³±°¡·±£³²³° ±²¥·³¡³²¡´±¢µ°¢´³¡µ¯³²¢²³³¯¡³±¤·±¢µ³£¶±¢¶³¤´²¢³°¡µµ£¶³¤´³¤³·¡´µ¢¶³¥´µ ¶²£·¶¦¶µ¥µµ¦´³¤·³¥·µ¤µµ§¹³£··¤·¸©·³¤·³¢¸³ª··¨º´¦¹´¨µ·§»¶¦¸¶£¶´¥¹·¥¸µ¦º³¨»´¥¶¶¤·´¦»´¦»¶§¸µª¹µ§¹¹¦¹³¦¸¶¦¹·ª»¶¨º¶©¸º¥º¶«º·¬»¶¨¹¸¦»¸©»·§¹¹¥º¶ªº·¥¹·©¼·¦¹»©º¹¦ºº¦¼¹¨¼¸ª»º©»»©¾¸©»¹¬¼»«»»ª»¸§»¼§»½¨½»©»¸©º¹¦¹¼¬¼·¨»¹¬»º¬¾ºª»»ªÀº©½º¬¼º«ºº«¼º©¾¹¬½º­»¼«¾¼¨¼»«½»­¿¼ª¼½¬¾»®À¼­¾¼®¼½¬¿»¬¼¼©ÀÀ¬¾»®¾»¬¿½¬½º¨¼º©·¶¥¶¬¬¬­£©¦uxok~gdzg{x`|g{zdxo[|q]zn]olWqlYru]qz]|q[xwW{u]uxYtnUokWroYwu[uq_qnWwoWnnMndOk_QndOgiWkgMgWI`OM`WMf]K`UD_[Q_UFf[I[SF_UK]WIbbKf]KbWKdQMbYDd_ObdOd`KidYllw³È§Ü¬³ä²¹ê·Âñ»Âö½Çø¿ÈúÆËúÊÐúËÐúÎÖúÈÓúÊÕúÉÓúÅÎù¾Ìö¾ÈñµÃï¯¾â¨¼â·Ý »Û¥·ß¥¶Þ¤¸ß¤¹à¤ºæ§»å«¼é­Àî«Àè¦Âé¨Áé¦Áë©Àí«Ãð§Åñ«Çó±È÷³ÎúºÐúÃÔúÊÛúÒÛúÔÝúÓÛúÕÛúÑÖúÑÙúÒÓúÑÕúÇÐúÅÎöÀÌõ¾ÊôºÅõ¾ÊöÁÊúÆÎúËÒúÑÙú×ÜúÛäúàæúçëÿÚæÍÁè¶Áå²Áà®ÚØ¾øÌÓúÃÒØÆ¯´Ìâµ¸á°ºâ«ºã®ºä°ºê³¼ò½ÂøÁÅúÊÊúÊÒúÒÕúÖÙúÓÙúÐÛúÒÙúÒÜúÎÛúËÜúÊÕúÅÚú¾Óú»Òú¸Ñú¶Îö´Éõ·Êô³Éõ´Èï²Çï²Ãì®Áê®Áæ¬¼ã©¼á§ºâ£ºÞ ¸Þ¨¹â¤»á¥ºå«»è´½ð¹Áò¿ÅöÂÊúÃÈúÆÌúÅÎúÇÎúÈÎúÊÓúÍÒúÍÐúÏÒúÐÕúÐÒúÍÖúÍÓúÇÐúÈÐúÃÎúÃËø¾Êõ¿ÇðºÂë·¿ë·»é³»à­»Ö¬³Õ§®Ò¡¬É¥Â¥¾º ®©¡zk|i{o_tqUqoSnoUotUn|Utbziª»É¡Ê¢Ã¶|µÈ¨ä¬¸ð°»ï®¼í®ºâ¯¹{[x_~{`|ziilinkd{_|kbwg|~`zt_|u_{x]~|kolkoi{gkd~k]zkUxnYrn[uq]rxYuwdgz¢¥³¨®»«·½®»Á±ÁÀ¯¿Â²ÃÀ°ÁÁ±Á¿°Â¿²ÀÃ²Â¾®Á¿±ÁÂ³Á¿¬¿¾®¿À­ÀÀ°Ã¼­¾À°À¼³ÁÀ¯Ã¾¯¾½¬¾¿°Á¾°¿À±Á¼±Á¼¯½Á­¿¾±ÀÀ­¿¾°Á¿®Â¿®À¼®¼¾®¼À¯Á¿®¾½°À»¯¿¿­¾½°Â¾¬¾¾®Á¾®¾½®½¾¬¿¾¯¿½°Â»­¾¾¯¼À¯Á¾®¿¼¯Á¼®Ä¾¬À¾®¿¼¬¾¿®¾½®ÀÁ°½½­¾¿¬Â¼¬¼¾¬¾½¯¾½­À¼¬¾¾­º»®½»¬½¼­¾»­½¼¬½»®»º¬¾½°½º¬¹»¬»¹®¾¼¬¼¼«»¾®»½¬¾½«¾»ª¾¼¬»»©º»©½ºª»¹¨¾»¬»¼©À¹ª¸¸¬»»«»¶¬º¹¬»º©½¼¬»½¬¸»¬º»ª»º¨¶¸¬¼¸¬¼¹©¾¸ª»¼¬À»¨»µ©º¹ªº»©·¸©¼·¬·»¨¹·¬¼¸¨»º¬¹¸¬¼»ª¹¹ª¸¸«»·¬º·ªµ·¨¹·©¹º¨»·ª´·¨»¶¨º¶ª·¶©»·¦·¸§·¹©»´§º¶¦·¶¨¶¹§´µ¨¶·©·´¦ºµ©¸µ«¹³§»·¦³·¨±³¨»µ¦µ²¡´µª¶·£¹±©³´§¶´¤¶¶¨¶³¦´´¥·´¥µ³¨³²¥µ·¤¶µ§µ³¦µ´¤³´©·³ª²³¨³´¥¶±¤·µ¢µ´¦µµ¢³°¦·³¤³±¤´³¤·°¦±³¦µ³¤µ°¤³¯¥³³¢¯³¦³²¦´´¦³´£´³¥³µ£·³¦²¯¥·³¦³´ µ¡©¦¬§¬¦°§¬¦­ª®§­ª®¨¯¨®©¯©®ª±ª¯­°ª±§°©°ª³§±«²ª²ª²¬±¬®ª³«²©°©²¥±­²ª °¬°©²ª±®°¬²¬³«²ª²¬´¨¯ª³®µ­²®°¬µ¬²¬´©³¬´«²­¡³­³«´¯²¬µ¬µ¬°°·­µ®³®¸°£¶®´¬£´±£³®µ²´®µ±´®¢µ¬¡¶® ¸± ³®¡·¬¸¯¡¸®£·° µ® ¶¯µ®¢·±£µ®¸±¡·®£¸±£¹®¢·³ ¶¬¸±¡µ°¢´¯¤·±¡¸± ¸³¡¸°¢¶±¢·±£¸¶¡»³ ·±£º³¡¼²º¯·²¤½³¡µ² ¹³¢·³¸¶¡º²¡º³ ºµ¡·³£¹°¡¸³ »³¥½³¢¹³£»°¡¹µ¡»´£º°¡¼µ¤»´¤»²¡·´ »±£¼·¤º²£º³¥º³§¹µ£»µ£¼·¥½µ§»´¡ºµ¤»´£»³£½µ¥¼¶§½·¦¸·¢»·¥½·§¾¶¦½¸¥¾·¦½µ¥»¶¦¾µ§»½¦¾·¥»¹¦½·§¾·§½¹ªÀ´ª»³º°¥¹· º´³©¬¦©£¢ xxl|`w]z[~tW|qW{t[{qS{kQxiQwdMr`MqgOxgStrYxnQukQrqMolQufIn`DriWuxSzkOtgIqgKn`FnYFgUIo]Di`KgYFgUD_MB`M=_Q=_O?`K?_M?`I=YMB_F8bOD_YFd]DbM8dI?_M=bQ=_WDdW=g[Mr|`qµÊ¬Ø¥²â¬ºê²Àï·Ãò·Æö¾Ìù¾ÎúÆÐúÇÒúÈÔúÈÒúÆÕúÅÒúÃÑúÃÎúÀÏöºÊó¶Æí±Ãè«Áç§¿ä¥¿à¾á»Ü»ß¢ÁÝ¢»à¤¾ß¦¿á ¿å£¾á¡Àæ¡¾è¢Áî¦Æï¬Èõ¯ËùµÏú½ÔúÄÖúÈÛúÎÛúÑÙúÓÝúÌÝúÌØúÌ×úÉÕúÊÐúÃÐùÃÎö½ÊòºÇòºÅñ¸Æð¶Æò»ÌøÁÌúÅÏúÍÕúÓÝúÙÞúÝäúßæúßçúâéúÝèúÛäúÒâúÎØúÈÔúÂÑô»Æî³Åå¯»Ý©¼ß©·Ý©¸ã­»ç²¾ë´½ð»ÃùÃÊúÆÎúËÓúÎÖúÑØúÐÝúÍØúÎÖúÌÜúÌÛúÈÜúÇØúÄØú»Õú·Ò÷µÒ÷²Îô°Êò³Êð²Èð®Èï°Æí­Æë°Åê­Ãìª¿åª¿ç«¾é«Âî°Áî²Áî³Çî¶Äï·Äô»ÇöÁÊúÁÌúÃÎúÄÍúÅÎúÇÎúÅÓúÈÑúÉÓúÈÐúÎÒúÌÓúÊÔúÊÔúÉÏúÇÏúÁÎøÀÉö½ÌòºÆð¸ÄïµÁé³Áå±»à¯¸Ûª·Ö¦±Ð¡±Ì¬Ä©¾µ°§¥~xndtWznOqgOqiMngMoiIqqQqUzi¨|·È¢Ì£¼¯tµ|Ê¨æ­·î®¾í®¾ì£¹Ì£]tSkSwuU|nbzd_|bfdx`tY~{]|]w[{rYxnWzoWzrWxr_~i_xg|d|]wbt_~w]|lUubOtbMrgMukQzkUurUzx]~kt¬®µ§³»¬¼»©¾»©¼·«À½ªÃ¼®¾½©¾»®Ã¼©Â¹¬¿º«¾»©¾½«Á»©¾¸©¾»«¾½¬¾¹ªÀ·¦½»¨Á»©À¸¬¾¸£¿»ªÀ»ª¾¾«Ã»¬Àº§Á¹«¿¹§½»ªÁ¸¬¿»ªÁ»®¾¹©½¸«¼»©¾¸«¿º©¾¹¦¾½©½·ª¿º§¾¸¦½¸«Á¸«¼º¦½µ§¾»®½¸¨¼·©¾¶§½·§¼¹«À¸§¾»«À»¨¾»«½¹¨½·¨¿·«¼º©¿·¨¼¶¦½·§¿º«¾·«»º¨½¹©»·¨ºº¦»µ§½¹¨½µ¦»¹©º·£¼¶¨»·¥»·©º¸§¼µ¨¼·§½·§¹³¦½¸§½¶£¸²£¹µ©º´£¼µ¤ºµ¦»³¦º·¥º´¤º²¦»´¥»µ§»´¥ºµ§¹º¦º¶¥ºµ¨»µ¤¸³¤¼´¦»´£º³¦·³£»³¥¹³§¹°¥º³§¸²¦¸±£º´¥¸³¤¸²¥·³¥¸³¤»²¢·¶¦º´¤¸·£·±¡¸°¢µ³¤º°¥·³£¸±¤´°¤¸²¶±£·²£·±¢·³¦¸³£¶²¶±¢·³£·®¡·¯¡¶°£´²µ­³­¡µ¬£´²±­ ³¯µ±¡³­£´¯¢µ¯¢´®·¬¡¶®µ±µ® ±® ²­²°¢¶±¢³° ´ª³­¡³®µ« ´®²«´­¤³¬±®³¬²¬²¬ ³«²®µ­°¬¢²¬²«²®°®¡´¬ ³­¡²¬³­³¬¡²¯¡´®³«²«±® ®¤«¬²­¯®¡³®±®³­¢±­ ³­¡³­²¯±° ³¯°¯³®³¬ ³®¢³¯ ¶³¢´®±®¤´¯´®¢³®¡³®£³³ ´®¤´¯ ³±³¯¤µ³ ³±¦±±·±¡µ°¢¶³ ¶°¡²°¥´²¡·®¡³³³±¤¶± µ¯¢³¯¡µ±¢²²¢·¯¡¶®´° µ³¡µ¯¢³±¥µ³¤¶´£¶²¢¶±¥·¯¤¹²¤¶±¥·³¤¸±¤µ±£·³ ¸²¦·µ¤¶³«¹µ ¹³£·µ§º²¦¼´¤º³¢µ¶¤·²¡¹µ¦¹µ©¸²¥»¶¥»µ¦·´¥¶µ£»·£¹³§¸¸¨¹³§»·§¸³¥·³£·¶£·µ¦¸³¨¹·¨´´¨»´ªº·©º´§»µ¨¶·¨º·¥»¹©¾·¦½»¬»·¨¼·©¹¸ª¾·ª»µ¨º¸¤º»¦¼¸¨½·¨º·ª½·§¼¶¦º¹¥»¹§»·©»¸©¾·§À¸¥¿»§¼¹©¾ºª»¹¨»¸ª¾º¬¿¹«¼¸¬»º¨»ºª¾»§»¹©¿¼¥¼·©¾¹©»¹§¿»¬¾¹¬½·©¾¹¨À¹­½¹¬Á»©½º­Áº¬¿»§¼½¬¿º«¿º¬¿»®Â½ª¿»«¿¾¬Á»¬Á¾¬¾¼¬¿¾¬Á»¬¿»¬¿»¬À¾¬½¼©¿·¬¼»©·µ£·¬°ª©¢¦¢§  {{uqgzf|df{ft`qY{lY{oWuoYxkS{oYut[zoSzqWzt]wo[toOuiSxri{`{t[zoUxqYqgOodUldOodSokYlgMn_MiYKgSFkSK][KfYM]SIdYF_QKfQIb[Md[Od`ObWFiWM`UMd[Fg[MldOi`UriºÈ£¨à¬³é­»í¹Áò»Çö¼ÊùÁÏúÁÌúÈÒúË×úÑ×úÎØúÎÖúË×úËØúÌÖúÉÒúÈÒúÆÓúÃÏùÀÎù¼Èõ¸Íê¯Æì°Ãí¬Åì¬Æé¯Åì«Ãð¯Ãí¬Ãï±Ëî­Éò¯Èõ¶Êø¸Íú¾ÓúÀÕúÈÕúÌÜúÐÛúÖÝúÕßúÕàúØÜúÓßúÒÚúÑÛúÓÖúÎÕúÈÒúÆÎ÷ÃË÷ÂÉ÷½Èõ»Çó½ÈùÁÎúÅÏúÊÓúÔÚúØàúÜãúãèúäçúäéúæìúàëúÞçúÝáúÕáúÌØúÆÒöÀÊñºÆç³¼â¯¾ã°»ä²»æ±¹é´¾ñ·¾öÀÆúÄÉúÄÎúÎÒúÓØúÔÙúÔÝúÓÛúÕÞúÖàúÓßúÕÜúÓÝúÎßúËÜúÇÞúÄÙúÁÕú¾Ôú¾Ôú½Îú¾Òø¾Îù»Îø»ÎöºÊ÷ºÊöºËõ½Èö½ÊúÁÍúÃÐúÆÏúÂÌúÈÏúÌÓúÍÓúÎÒúÎ×úÐÖúÎÔúÌÕúÊÓúÌÕúÐÖúËÖúÐÕúÒÕúÎØúÌÖúÈÓúÇÐúÊÐúÂÍ÷ÃËöÀÈò»Æò»Åì·Ãé¶»ä³ºà®µ×ª³Ó¥°Ó¥­É©À£º¶©¦wnbxr_{qWuoYqnWnuUuxYr[zq¬¿¡Î¦Î¦Æ¢³|· Õ¡®ð¶¾ó½Àõ·Áèµ¹u`n[u[|~`|kigknibw]b~f|bw`zu_|r]{z`t`okikln~f~bxb|nW|i[xl[{r[wr[xu_{|gqx­¢¯¸¦¶»®º¿­¾½¬¾¾³ÃÀ¬ÂÁ±ÀÀ¯Æ½³Ã¿¯Â½°ÁÁ°Â¿±Ã¿±À¿²ÁÁ®Á¾®ÁÁ®Á¾®ÃÀ±¿¿¯ÁÀ¯ÀÁ¬Á¾¯Á¿±ÁÁ±Á¾³Ã¾¯Â½®¾½¬¾½®ÁÀ°ÂÀ²¿Á­ÁÁ±Á¾®Ã½­Á¾¬Á»°Á½®Ã»²ÁÀ¬¾¿¯Á¿¬Á¿¬¾¼¯¿»°¿º¬¼½¬Á¾­À½­À¼±Á¿±¿¾­¾º¬Á¾­¿¾¬À¼­À¼¬¾¿¯¾¼¬Àº®½»¬¿½±À»¬Á½¬¿¼°Â¾®À¿¯Á½®Àº¬¼»¬Á¼¬¾¼®¾»­¿¾¯¼»¬Áº­»»¬½¹®¼»­½º¯À¼­¼»®»¾¬¿¼¬¼»ª½»©¾¾­½»ª»¼«¿¼®»¸§»¾­¾¹ª»¹ª¾º¬½¹¬¼¸¬½»¬»»«»¹¨¿º¯¿·ª»¸­¾·¬¾·¦¼´¬»·­»·ª½»«»¸ª½·ª»·©¼·¨¾·¬¼¹«··¬»¹¨¼¸«º¶¨¸·«º·¯º»ª¸º«¼·¬»µ¨¼·¬»·«»·©··¨¹¹¨»µª¸µ©ºµ«»·¬¹¶ª¹´§·³¦¸¶¦¶µ©»¹¦·³©¶¶¦¶´¨¸¸¨¶´¨·¶§¸´¥¶±¨¹·¨¶µ£¶³¨·µ§µ²¤³³§ºµ¦¶¶¨µµ¦·³¦º³¨¶²¤·³¤¶¶§·³§·²¨ºµ¡¶¯§·®¥¶³§µµ¤·³¥³²¡²±¥·¯¡´²¤¹°¤µ³¥¶¯¤²±¥³³£·³¡³²¡²²¨³´¨·´§³²§¶¯¥µ³¥³³¨·°¥µ³¤²¯¤´²¦³¢§¤¯¥­¨°§¬¨®«°ª³©­«¬©°¨¬©®ª¯©±¬°©²ª°¨®§²¨±¨®«±¨ ­ª±«°§°¬´«±©®¬²«²¬²¬³©°¬²«²ª²¬²°±«±«±«³®°®±¬²®°®´®¢±©³¬±©³ª³­³°µ°¡´®¶­³«´­·²µ®³¬¶°¶­³¯´¬ ³¬µ®²­ ¸¬³² µ°£´°¡µ­µ±£¶¬µ°µ¬³°·³¡·±·¬µ²»°¡·®¶¯£¸²¡µ² ·®¤¶°·®¡»°¢µ°¶²¢·³·² ·°£º²¢·´¡µ²¢µ³£¹³ µ³¡·³¦·±¡·²¹°¢·² ·±¡¸±¢¹´£¹µ£º³¢¸³¥¸± ¸³£·°¢»³¥º´¤¹µ¡º²¢¸µ¤»³¦½µ¡»³£¸³ ¼¶¤»´¢¸´¥·²¾µ¥¹´§»² ºµ¡¸³¢½³º¶¤¼¶§»²¥¸³¡º¶£º¶¥¹²¤¹³¤º´£º³¥»·£¼¶¦»µ¡»·¦»·ªºº§½·¦¼¹£»·§¾·¥»·§¼·ª¾·¦½·¤¼·¤»¶¦º¹¤¸µ£¹³µ¨ª¥ª£~xrng~_u]qY{wYwWrUwkMtdOqfItdMrgQqiKukSqdKtkIxiMt`ItbFu`Kqnfzz[zkWtgItfMl]Dk]IiWIi]IlgQkfIgU?`F=`K?]I?`OB[K?`I:bK:WK:YF:]I=`Q?`_Db]?fQ?`I?]O=_QB_OBgUKqudz«wPÖD»á¯»ì´¿ï·ÂïºÆö¹Ê÷ÁÏúÁÐúÇÔúÊÕúÈÖúÊÖúÊÓúÉÖúËÕúÊÖúËÓúÈÓúÄÒúÅÑúÃÑú¾Îú»Ìö·Êö·Êõ·Ëõ¶Èõ·Èö¶ÊöµË÷»Ìø¸Ë÷ºÍú¾ÐúÂÔúÃÖúÄÖúÇÕúÐßúÒÝúÔàúÓÞúÐÝúÒÙúÏÜúÎÕúÏØúÌÔúÈÒúÁÏúÀÊö½Ìó¹Éô½Æó»Çï¹Äó»ÈöÂÍúÆÐúÐÖúÕÜúÙàúÜåúßèúÝçúàèúÝæúÙâúÓßúÏÙúÉÔúÁÐôºÈì³Áã¯¾Þ¬ºÝ¬¸à«¹â¬·ä°¹ì²¾ï¼Á÷ÁÊúÂÌúÄÍúÊÕúÒÕúÓÜúÒÛúÏÛúÐßúÒÞúÐÝúÒÝúÐÝúÍÞúÌÜúÈÙúÄØúÄÖúÆÖúÈÖúÆÔúÆÓúÃÓúÃÐúÃÐúÄÒúÁÑúÅÐúÅÒúÈÐúÉÑúÉÓúÎÓúËÐúÌÓúÎÕúÌÖúÎ×úÍÖúÌÖúÊÖúÌÖúÇÓúÊÕúÆÔúÊÕúÈÒúÉÖúÈÓúÆÏúÄÏùÁÊùÂÎö¾Çò¸ÄðºÅíµÂì´Àæ±»ß°¼Ûª³Ù£³Î£¯Ò«Â¥º¡³®¦¡~un`|qYxlO{iKngKnfFlgIqwOqY|gª|»Ì£Ì£Á¡¯w¸¤Ø¥°í·½ñ»¿ò¬¸Ð«`lOiSuU{zY|wW[|[w_|``xWnW|uWztYrY|qY{oQzk[zqQ|qY||_`z_|`|dxdxd~~`qSzdM{`KwlQtgQxlQukMzrU|rgi£ª¯³·¥¶ºª»¸©¼·«¾»¬½»¬Á»¨»¼®Á½¬Á½©¿¼©¾º¬Â¾©Á¹¬¾»ª¾½ª½»¬¾¹ª¿»«Â¹§¿¹©À¸¨¾º¨½¸©¾»©Á¼¥¿¸ª¾º«Áº¨½»¬Á¸ª¾»¬¿¸¬Á»¬¾¼©¾¸§¾»¨¿»©À·§¾»©¾»¤¾¹«¾º©¾¸¨¾¹¨¾µ§¾»©»¸¥»¹¨¿º©¾¸©»·«½·¬½¸§¼º¨¾·ªÀ»«¹·¬½º©½¹©¿º¨¾·§»·«¾·«¼¸¦¼¸ª¿·¦»¶¨¿º§¼·§»¸¦¼·£»µ¥»µ§½·¨»¸¦¼¶¨¾¶§½µ©¾µ§¼·©»µ§º´§»¶¥ºµ¦»µ¥»µ¦¼¶¦»µ¦»·©¹¶¥»·§¾¶§¸³¦¸´ªº·¦»·©»µ¨¸³¥»´¨ºµ£¹³§»´©»·¦»·§»´¥¹³¤·µ£·´¦»¶§º²¥¶²¤··¤º´¦·²¦º°¢·´¦·³¢º³¤»³¥¸±¤¸´º²¢¶°¦¸³§¹³£¸®¤´²¡·±£¸°¤·¯¤¸³£µ±¢¶®¢·¯¢¸²¤´°¢·¯·± ´­¡µ³¢µ³£¹°¡·¬£µ± ¶­¤µ®¢´²¡³¬£´°¡¶°³®³­´¯ ³®·¯ ²²µ­ µ® ³®¢³¯¶¬¡³¬ µ«´°¡´® ´®¢³¬²¯³¯¤±­³®³®²¬¡²¬±­±­°¬³¬²«±«°¬²¬®®±­³¯¡³ª¢µ«°¬£²¬µ¬²ª¡±¬¶¢¢¨¬²­¡³¬ ¯­ °«±¬ ³­³°¡°­±°¡³®³­®®£µ¯ ´¯°±±®¡³° ²®³®²¯¡¯°¢¶«¢³®´±¢±¯³±²°¥´­£¶° ³® µ°¢¶± ·´¡³±£³¯´¯¡³²¡¶°¤³°¡µ³¸¬£´±¡³°£·³¡¶²¢³¯£·³¤·±¡·²£´³¢¹²¢µ±¤·²£¸±¢³³¢¶³£´²¤´µ§·³§·±¤·³¡µ±¢¸±¦·µ£µ³§¸±£¶³¤µµ¢¸³¥·³¤¹´£·³¥µ²§º³§µ±¦¹µ¥··¨»´¤··¡¹¶¥º·§º´¤»µ«¹µ¤··§¹¶§»·¦¹³§»·¤¹µ¨º·¦º·¥··§»¸§»´¥¹·¦¼¶¨¸·©º·§º¶ª»¸¦¸¸¦¹·§¸ºª¹º¥½·©¾¶§¼·ªº¹§½¶¨¾·¦»¸§¾´©»·¨»·¤¼µ«¼¸©½¸§¹¸¦¼ºª¼·£¾¹¯¿»¨¼·ª»º¨À¸¨»·ª¾¹©»¸¬¾»¨½º«»¸¦À¸§¸·§Á¸§º·©½»¨½»§½·¦¿¹§¾»­½¸¬¼¹©¾¼¬¿¹©½»©½»¬¾»§»»«Àº¬»º¬½¹¬¾¾­¾»¬Á¼¨¼¾¬¾¼­¾¾«½»­¾½®Áº¬½¹¦¼º¨·µ·®­©¬¤¨¨ª zrqdzkzbd~_u`zoSwo[uoWqlUwn]roYztYxoYxrUznUukQrnOufQuuizf|t]wrSwlWqbSngSqbQqdQrl]liUn`OkQKgYFbUDg[K]WIdUKb[I_SD`UI`SK_YKbdQgbDd]KiSKiSFd]OfWFfdUr~n^µW"î8ä/(ñ!Ñní¶¼ò»Æô¾É÷ÁÍúÁÐúÇÕúÎØúÎØúÍÙúËÙúÎÚúÕÝúÐÚúÎÚúÑÝúÐÛúÐÖúÑÛúÓÛúÎÕúÏÛúÎØúËÓúÎÕúÉÖúÈÓúÉÖúÈÔúÊÕúÉÖúÊ×úÍÙúËÕúÐÙúÓÝúÒÝúÕàúÙáúÝàúÕàúÓÛúÓàúÖÜúÕÛúÔÛúÓ×úÌ×úÇÓúÃËù¿ËöÁËöÁÈö¾Èó¾Êø¿ÊúÃÒúËÔúÒÙúØàúÝâúÜçúãéúãêúäêúáèúÛçúØâúÕÜúËÔúÃÒ÷¼Èï·Ãç²¼â³¼á³¼ç´½ë²»ç´¾ï¶Âó»ÁúÄËúÆÐúÉÓúÑØú×ÛúØÞúÙáúÙáúÖÝúÕàúÕàúÙàúÚæúÙâúÔãúÕàúÒßúÑàúÓàúÕáúÖÛúÕàúÔßúÐÛúÓÜúÓÞúÓÜúÕÜúÖØúÓÜúÕÛúØÚúÔÜúÒØúÕÜúÑÝúÕÚúÔÚúÒ×úÒÙúÒÙúÒÙúÏÚúÒÙúÐÙúÐØúÑØúÏØúÌÓúÊÓúÇÒúÇÐúÅÎ÷¿Êö¾Çõ¿Åì¹Ãí¶¾é·¼çµ¿ß®¹Ù¨°Ó§±Ë¡¬Â¤¼¥¸°¨¡wtfx_xx]{wWwoSrnOwuQrz[td~o®À Ï§Ð¬Ç£¸¡Á§Þ¯³ô½Âö¾Âè¤´¶w¡xWo]did|iifill`u_{]~bw`r`|{d~uf~{]~x`lndll~kkl~bo]~l]xr[{q[zrWzl_z|b~iwª£¨·¦´»ª¶½®¿À¬À»°¿¿±ÂÁ­ÅÂ¯À¾°ÁÁ³ÂÀ¯ÂÀ®Á¿³ÂÀ°À½®ÄÀ±Â¿¬Â¾²Ã¾®Á¿±ÂÁ¬Â¾­Á¾®Á¾¯¾½¯¾¾¬Á¼®¾Á®ÃÁ°Â¾¯À½°Â¾±Â¾¯À¼¯Ã½¯ÃÀ¬¾À¯À¿­Â¾¯¾¿±¿½®À¼ª¿¿®Á¿¯Á¾®Á»«¿¾¯Ä¾­Á½®½¾¬Á¿°Â»¯À¿¬Â¼±¿»¯Â¾¯¾½®¿¼¬¾¾®¿¼­Â½­À¾¬À¼­¼»±¿¾¯Âº®»¼­¾º¬ÁÁ­À¼¬À½®¿¼¬Â½¬¿¹ª¾º®¿¼«¼»­¿»¯½¼®¼¾®¼»¬¾¼­¾¿©½º¬¿¼¬¿¼®¾¹¬¾¹«¼»«¼»¨»¹«»»­»½«»·¬½·©¼¹¬»¶©½º¬¼¹©»·¬»¹­¿¹«ººª½»ªº»¬½µ«»·©¹¸¬¼¸¬¿¶¬½¹ª»¶«¾·¬¼»©¹·«»¸§¾·ª¼¹¬¹º§¼¹«»»¦¾¶ª»·¥»·ª¼·©¸·«»¸¨¹µ«ºµ¨º»ªº·«¸µ§¼¸¨»º§ºµ§½¶¨¸´¬¹´ªº¶¥··¨¹³¥¹´§·´©»µ¨·´¦·³¤¶µ¨»µ¨¸¶§·±£¸´¥¹³¦»¯§»´¢¹³¤µ³§¹²¥¶·¨¶²¨·³¡º³¨·´¥º´§·³¢³³¨µ´§·³¦¶´¥·³¦´³¤´±£µ³¤µ³¥¶®¡³®¥³°¤¶µ£¶²³®¥·²¤µ¯¢·¯¢³°¥´³§¶±¡µ¯¤³¯¨³²¥µ³¥²±¤³²¤·°¤³´¤·³¢²¡ª©­¦®¨®¨®§««®¦¯¥­©°§®¦²©°ª¯¦²«¬ª¯«°©®¬®¨°§²©­«±¬°§°­ ±¨²¬³¨²«­¬±ª±ª°ª´ª°¬³­°ª²¨²ª°©³«°«´¬³­³¬±¯³¬³©³¬³­µ«³«±¬ ³°µ¬³® ³¬´®³¬³¬¡·®³­´ª´¯µ± ³°µ¯µ¯³¬·²µ¬³®µ¯·­´¯¡³±·¬¢·¯¶²¶¯¡·°¢¶¯ ¸±¡µ³ ·³¢¸®¡³¯ ¹°¤¶° ·²¢¸±¡·® µ°£·³¡·¯¡·²¡¸®¡¶³¸± ¸²¡·³¢·³¡·²»³£¸±¤·²¡·´¢³²¹²¶±¢¼µ¡»´¡¸´¢¹±¤·±£¶³¡»³¢¸¶¡¸³¤º³¥»³¡º´¡¹³¡»·¢¹¯¤·± ¸³£¹°¡¼³¥¼¶¥»³§»¶¥»³¨»µ£¹µ¢¹µ¢»³§»µ§¼³¤º³¢»´£»·¥»·¦º¸¨»µ¦»·£»³£¹³¦º¶¾·ª¾µ¨»´£»·¦¾·¤¼µ£½·¦º·¥¾·©¼·£»»§¼´£¹³£»¶¤¶­²¨«¤§§ twtb{`x[u_w`zW|iWtkOxgMrkQtdOt`OokSwkStgKqgMtfQqdKo`DobMtrWxu_{nUqgMr`Mo]InWIkdFn]SkiMldMlQFgKDbQ=`F?`M=_M=]F?]KB[F:_D:]K?UQ?bQF_WDdUBbM?`K?dI:`ODbSKwfum3Ö-°wÄ¡¦Ãy&ñ ·Ãí¸ÁïµÈô»Æ÷¾ÌúÂÏúÇÓúÊÔúÏÖúÌÛúÌØúËÚúÒÜúÐÙúÑÛúÐÛúÒÜúÓÛúÓÝúÒÚúÒØúÐÙúÎØúÍÖúÎØúÐÙúÊÜúËÙúÌÙúÊØúÊÝúÏÜúÎØúÍÜúÐÝúÖßúÔßúÔàúÒßúÒÝúÓÜúÐÝúÑÝúÍÚúÌÖúÌÕúÈÑúÂÐú¾Ìö¼Êó¼Çò¼Èó¾Éð»Èõ»Ê÷ÁÌúÈÒúÌ×úÑÚúÓàúÛäúÜæúÝçúÙæúØæúÖßúÑàúËÙúÇÒúÀÊð·Äê³Àç«½â®¹à­»à¬¾ã®¸æ²½é²¾í·Âõ¼ÆúÁÌúÆÑúÊÕúÏÙúÐÛúÕÜúÓßúÒÝúÓàúÔßúÕàúØáúÙàúÖâúÔÝúÕâúÒÝúÓÝú×áúÕáúØÝúÖáúÒàúÕÝúÔàúÕÜúÖÛúÖÞúÕÝúÓÝúÔÚúÑÝúÓÜúÐÖúÒÙúÎ×úÏÛúÌÛúÍÚúÐÙúÎÙúÌÖúÊ×úÏ×úÎÕúÏÕúÊÔúÃÏúÅÏúÁÌøÁÌ÷¼Èô¼ÈïºÃî±Âì·Âå´¼â±¸á­¹Ü¬²Ô£²Ì¬Ã©¼¹°«¡xui{dlStnUriQrlFllQtWnXMS}_xd¦|«gËS»tÀ·£¿§Ü¬³îµ¼ë¬¸Í¨`gMdWzgk]zY_x[x`|``uUlYrUzYxlSwlYzkSzoU|oSzoS{tb~fz_~`bz_x`k~dqY|gOugQxkQrgUtlSwtYzrd||f{£¯ ®µ¦¸³©º·§À·¨¿º«½»¬¿º©À»ªÀ»­¾·ª¾»«¾º«¾¹ª½»ª½¹¬½¼ª¿¾­¾¹«¾»¬Àº©¿¶ªÁ»©¾¸ª¾¹¥»·«½º¬Ã¹©½»©¾¹¬¾¸©½º«Á¹©¼»©¼µ§¿¸©½»§¾¹­¿·¬À»«¾¸¬¼»¨¾·©¾»«½¸§»·«¼¸©»·§½¹©¾»«¾·¬¾·¦º¸§Á»¬¿µ¥»¸«¾¶§¾¸¨»¹«½·©½¸§¿¸ª¾·¬¼·¬¼·ªº¶ª½·ª¾¸¦¼¹ª¾·«½¶ª»·§½¸§»º¦º¸¨¾·«»¸¦¼µ«»³¤½·¥»·¦º»ª»µ¨»·©»·«¼·¦¸µ¤»·¨¸´¤¹µ¥¾´§»µ©»³§¸´ª»µ¦·´£¸µ¤½´¥»³¥»µ¥»³¨¹·£¹·§¸¶¨»´¥¹´¦»µ¢··¢·µ©·´¤¶³¤º°¤¹°¤¹·£¹³¤¹·£·³¤¸µ¦·¶¥¹³¨½³£¹²¥·²£¹²¤¸¯¥¹´£·³§·²¤º²£¹´¤¸²¢¸²¢·³¤¸³£¶¯¡¶³£¹°¤µ²£·¯¥·²¡·®¢·®¦·²³®¤·° ·³¡³®£·­¡¶±µ­¢µ±³¬´¬¢´® ´¬·¯´± ¶¯¶²±¬¢´­µ® °­¡´®´®¡±­¢´°µ« ±¬ µ­µ­°¯´ª³¬²ª ¶«³«¡µ­ °¬¶¬±¬²¬³¬³®°«³ª¢²¬°¬¡°«¡³®³¬ ³¬°«±¬²©«­°¬³¬¡´¬³¬ ¯²°¯ ²¯¡°¯®¬³¯¢®¬¡°¯ ¯­¢´±±¬¡²¯¤³­¡°¬ ±µ±¯²®¢²¯³²³¯ ³¯ ²¯ ³° µ®¢²²¡´¯¡³®¡±¯¢³°¸° ´²¢³´¤±³¢µ² ³²¢³°¡¶³¤³¯ ³¯¥´°£µ² ·³¥´²¶±¢¶³³±¢µ²£³´¤±°¥·³¢µ±¤´´¦¹±¤¶´¤·³¤·³¦·³§¶°¡´°£¹³¥¶³ µ²¡·³¡µ¶¡·°¦¹³·¶ ³±¥º±£¸³ ¶³¦·µ¢¶³£¹´¦·´¦»³£¹¶¥·µ£»±¤¹·§º·©·´¤¸·§¹¶¦»¸¦ºµ¤º¸¨º¶¦¸·¨¸µ¥ºµ¨¸·¤¸¹¨·´¢»µ¥º·¦··§¹º§º¶¦»¹¥¼¶ª»»©»´¥»¸¦º·«¹·ª»·¦¸¹ª»¹¨»¶§º¶£¸¸©¼»§¼»¨¼·¬¼¶¬¼¸¥»¹§»¹¨¿¹¦»»¬»¸¤¾º¨»¹§¼»¬¿¶§¼»¤»º«»º¨»¹«¼»«»º¬¾»¬½·¦»·©Áº¨»»ª½¹­¾½«º»­»¼¬½¹¨¼»¬¾¾ª¾½©À»ª¾½«¾»¦»½¬¼º®»»«¿¼ªÀ»¬¿»ªÀ»®À¾¬¿¹§½¹©¹¸¦º³¤µ°­©­¦¦¤ {{|oib~bkbzt`xoQwoQtnW{nQqqSuq]{x]xnYtqWxrUrnYuiQukWzw`wobxt[uoSroSofUndOufMnkYoqYtoUo`Si]Mg[FdSKg[F_UF`UK]UK_SB`QMdUBb[F`_O`]Of]Id[M`[M`SO_WId_Ur{m}·Ð¤­^ÜL=ë1á·ºï½Ãó¼Í÷ÂËúÃÎúÈÒúÍÕúÏÖúÕ×úÐÚúÒÜúÒÜú×ßúÖßúØâúÙàúÙáúÛßúÜäúÚàúÙáúØâúÛáúÚáúÛâúÕßúÖáúØßúÓßúÓàúØàúØáúÖßúÙáúÛäúØãúØãú×àúÕàúØâúÖÞúÕÜúÖÜúÕÛúÏÚúÏÔúÈÒúÇÒúÃÍøÅÊöÃÍ÷¾ËõÃÉ÷ÀÌùÀÍúÄÎúÆÖúÑÖúÕàúÙäúÞèúàæÚäÌìíué}¢âáÑÄøÈÒÀÎrÞ\¸Èç³½å³¼ç®»æ¶¿ìµ»êµ¿ð·¾ò¾ÃùÅÊúÈÍúÊÓúÌÕúÓØúÓÜú×ÞúØáúÙáúÚâúÜáúØáúÜâúØãúÜäúÜæúÝãúÚãúÞçúÞæúÜåúÜâúÜäúÜæúßåúÝçúÝãúÝãúÝáúÝàúÙáúÛßúÛáú×ÜúØàúÓÜú×ßúÕßúÒÝúÑÛúÒÙúÓÜúÓØúÐÙúÒ×úÎÚúÐÔúÐÕúÈÒúËÒúÃÐúÅÐ÷ÂÌúÃÊó¿Èò»Äï·¿ëµ½å³ºâ³¹Ý¬´Õ«¯Ð£«È§Â¢ºµ°¦|uqnx[xu]uqYux]oRMïJE_{rï0ë&/ê%bÎQ»¤Ãªå¯¶ðµ·ã ®·z{]iS{n_xoui`f`fig|[{d~`||`~u`{w]{u_xw_|x_{wf~|oldni~d~lnqdu`|o[{uUwq[xn]{x_|i~lz °£­·§·º­¹¾¯¾½­¿¼®¿¾¬¾Â®ÀÀ­ÀÁ®Â¿®¿Á¬À»°Â¿°¿À°¿¿¯¿¿±Ä¾¯Á¿°ÁÀ®Á¾±½»¯Â¾°¾¾¯Á¿®¿»±ÁÁ¬Á¾®¾Á®Á¾­Á¼°À¿±¿Á°Ã¿¯Á½®Á»°ÀÁ¯À¾±Á½­¾À®Á½¯¿¼¯½½®Á»±À½­¿¼­¾½­¾À®Á¾®À½¬½½­¿¾ª¿¿¯½¼°¾º­¾¾³¿¾¬½¾­À»¯¾À±¾¿­Á½­À¾¬¿¾¯¾¼­¿¼±À»¬¾¾©¾¾¯»»®½º¬¾¾¬¿»¬¼¼¬½º¬½¾±¾»©¼»¬¾»¨»¼®¾½¯¾¿ª»½®¿¼­½¼­¿º¨¾ºªºº¬¿»¬º¹¬¼»¬¼º©»»ª»º«¹¹©»»¬»¹©¼¾¨½¶¬ºº¬¾¶«½º¬¹·¬¼·¬¾ºªº·­¹º©»¹¨¼¹«¹¹©¼¹¬»ºª¼¹­»¸«¾·¬¸¸¬º·«»»§º·¬¸¹¨»¸©¹µ«¹·ª¹·§»·ªº¹¨º¹ª»¶¨½·©»¶ª¹¶«¸´©··§¹¶§¸µ§¹¶§¸µª·µª¸´§¸¶ª··©»´¨··¦·´¥¸´¨¹³¨·´¦·³ª¸µ¥·²¤¶³¤·µ©¹µ¦·°§·³¤µ³¥µ³¤·³¤·µ§³²¡´´ µ³¥´°¦²³£µ³¦´±¥·³¤´³¤µ³¦µ°¥³³¦²³§µ±¥´²¤³³¡µ³¤³³¥µ³§³³¢µ³¤´²¤²¯¤´°¤³´¥°±¥³¯¥¶®¤¶´¢¸³£¶³£µ°¥´¶¥³´¥´¯¦³§¨¬¥¬©®§¬¥°©±¦®©°©°§¬©±©²©®¨®«²¥®©¬©°«­©®©®§¯«´©®¨±«±©²«°©°©««µ¬°¬±¬³«±­³¬³¬±ª²¬³¬±ª°«³®´­´©¯®µª²¨´±µ¬³¬³®²¬³­´­³±³¯µ±¢´¬³« ´¬µ­´®¶®¡µ¬²®´¯ ³¬´®·®µ­µ­ ´±·®·°£³¯£µ®²°´± ³­¡³®¶¬¸® µµ´°¢¶­ ¶µ¸°¤¸°¢¸±·®µ¯¡´®¥¶³£¶³¡º°µ¯ ·±¡´³¤µ²¥·³¡¹³¦¸®£¸±¡¶´£º³£¶²£»³ ·±£»³¡¸²§»³¢º²£¹µ·¯¢¹³¢´²¢¸³£¸³¤º´¤µ² ¹µ£»³¥¹µ©»µ£¸´¢ºµ¥¸³ ¼³§·µ¦»³¤»²¡º²¤¹µ£½´¦»µ£»²¥º·£¸·¢»·¨»³¢¹´¥½³¤½¶£·³©½¶§¾¶¦»³¥»´¦½·£»¶©¼·¤¼¸£¼¶¥ºµ§¼´¦»·¥½·¨½·¡½·¦¾·¤»´£»µ¢»­±ª©¢ª¡¤¢utxdxb{Yx_w`wW~kWulOtiIrdMqdOq`KodSzqSxiSogMqbKn_IqfFn]OoiQqgOqnUwfMqdIn[Fq[Ii`Do`QnnYqiMnQIgI=dI=dIB`I=_K=YI?]D:]I?_I:[??`MB]WD`QBdUD]KB`OB_K?`KDdQMnod|»~Ák÷¸¼è±¾íµÃñ·Æô»ËúÂÊúÅÐúÈÓúÌÖúÌØúÐÚúËÖúÍÙúÓÜúÕÛúÕàúÖÞúØàúÚáúØáúØâúÙáúÚáúÙáúÕàúÙáúÖáúÔàúÖáúÕáúÓâúÕßúØäúÙßúÖáúÖßúÓàúÔáúÓÞúÑÝúÔÝúÒÞúÔÜúÏÙúÏÙúËÓúÇÖúÆÏúÃÎúÄÊø¾Èó½ÈòºÆó½Èò¾Èö»É÷½ÍúÃÑúÊÕúÑÜúÙâúÜãúÛåºäªOóH(ù$ú5ô.ôÈÓØ!ö<ë1õÍwá«¸Ý¬·ä¯¸å±»ç³¿é·¾ð·Â÷¼ÇúÃËúÄÐúËÕúÎÙúÏØúÐÝúÕßúÖáúÙßúÚàúÖáúÙäúÕäúÖáúÚâúÛâúÝãúÙãúÚâúÝäúÛåúÖâúÛäúÚãúÜåúÜâúÜáúÛâúÙâúØáúØáúÖàúÕàúÒßúÓàúÒÜúÎÛúÎÝúÎÙúÍÚúÌÙúÎÙúËØúÌÙúÌÔúÅÑúÊÓúÈÕúÅÓú¾Ìö¿Ëö»Æð»Èñ»ÄìµÁê³¿ã°ºàª¸Ü©º×§²Ò­Ê¦À¢½ ¹¬¦ {xli|bxkSzkYtrYqYwXÍ è:¨<[|p3Ú-?Þ6±¼¸·oÃ]ªÁªà¯±â¤°Ï¥_fM~iSzkSwkl``g_w]_brWrYzrYxOwk[ukW|qYznWznY~qW|r]~lbddx`ubzbzngtYkQxdKtiQtfWwkY{t[|u`{q¥¥´¢°²¥·¸©»º¥½¸ª¾»¬¾¾©À´ª¾º©Áº©¿¸ª½·©À»­Àº©½»©Áº¨À¹©»º¬½¸©¼¸§¿»«Á»¬¾·¬¾»¬¾»«¾¹«À½ª¿º¬½»¬½¸ªÀ¸®Á·«¿¹§¾¸ª½¹©¾·ª¾»¨»·©¾»©½º«¾»¦¿µ­½¹§º¶¨¾¸¦¿º©½¹¬½·«¾µ¬¾¶¬¾µ§¾»©»¹¨À·©¿»«½¸§¼¸ª»ºª½¸§½¸©»·ªº·§½µ©¸¶§¼¹©¿¸¦»´¦»·¨¾¶©¼·¬»¸ª½·ª½·¤½¸ª½µª¼µ¥½µ©º¶©»µ©¼·§¼¸©º¹¦º´¨º·§½·¨¾³¥¹µ¨ºµ¢¹¸¦¼¶§¸·©¹³¥º´£º²¥º³§¸³§»´§¸¶¨»´¤¹´§¹³¦½²¦¹±«»²§¹´£º±¥ºµ¥º²¦¸°£¸´¤»³£·¶£·³§º³¦¸²¡¸±¦·³¦º³§»´¤·°¨¸´¡»±¥¹°¤·³¢·³£¹³§µ³¥·±¤¶³£º°¤µ²¦·­ ·°¦µ®¢¶¯¥´°£´¯µ¯¢µ¯ ¶°¡¶­¥µ³¶°£·¬¤·°¡¶¬ ³°¢»°¡²±£´®¡¯­ µ±µ­¡´® µ¬¡µ®¢µ« µ±´®¡´­³® ´® ³­£´®¢³®£¶¬£µ­ ³¬±¬¡µ®³­¢·¬¡³®±«³®²«²®¡²«¶«²¯¡³­´«¯«²¬³­°¬³¬¯ª¢±¬³«¡³­±« ³°¡³ª«¬­¯°¯¯® ®®³®®¬¡±«³¬³¯¯¯µ­°¯ °¬³­ ²®³±¡³®£²¯³® ³® ³¯ ±¯¡³¯¡³¯¢´®¡²±¤¶°³³±¬£²°³®¢³±¡µ°¡±³¢µ­¤´°£¶°¤²° µ®¡³³¥¶°¦´¯¶°¢¶¯¤´³£µ³¢´¯³³¤´²¥³³¢º¯¤´³¡¶²¢¸±¡¶³¤³³¡¶·§·³¡µ³µ´¡¸´£µ°¡´³£·µ¤º³¡·³¤¹±¥¸²¤¶´¦·²¥·²£·³¦¹µ§¸³¢¶µ¥·µ§»´¦·µ§µ³¢¹´¢¸¶¨¸³¨¸³¡ºµ¤·¶¥»´¥¹µ¤º´¨»¸§¸µ¨¸¸£»´¦ºµ£º¹¨º³¥º¹©»´¥½¸¨º³¨»¹§¼³§»µª»³¨··ª¸¸«»º¨º¶¦»·¥»¸¦»¹§¼¹§º¸¥»·©¼¹ªº¸»º§¾·©¾º¬¾·«¼¹§»¸©½¸¤»»¦»¹ª½»ª¼·¦¼¸§¾·¦½¸¨º¸¨»¹¨¾µ©»·¨½º©½¹ª½¹ªºº¬¼¹¨¼¹­½º¬¾½ª¿ºª¼ºª¼¼ª¼»«¿¾¬¾¸¨»¾¬À·ª¾¾©»º®¿»«¼»¬½»ª¾»©¾»§¾¾«¾»ª¾»¨¾»¯¾½ª»¶§¶·§·¶¡¶®¯¬®©ª¡¢w|of`~gf|x`r_tx[ztSxnWrnWwkWrl`x{YwuYrkSzkSqiMrfQrdWtqUqlQroWtuWttSr`QodQniQrlYrx[rw[lfSoSKgWKfYOgSF][I`QMb[I`SO_SD[SIf[K_[Mb[Kf[KbQKg[KdUQb_OdYUlui¢lÁ]ÿ°½æ³¹ì¶¾ñ»Æõ¹ÉøÁÏúÇÎúÈÓúÊÕúÒÚúÐØúÐÛúÒÙúÔÝúÕàúÕÞúÛâúÙâúÞáúáäúßæúÝèúàæúßéúÞäúÝçúÝæúÙæúÞèúáèúÛåúàãúÞçúÜäúÝäúÜèúÙãúØßúÙäúØãúÖâúØâú×áúÙÛúÒÝúÒÛúÎØúÊÕúÉÑúÈÑúÆÎúÃÊùÂÌùÁÊöÁÌöÀÈøÁÊúÈÎúÈÒúÊÙúÖàúÜäúÝèúßéøáçîÞàwëmþÑÕ¹ÛÐ»%öÙvç¼¼Ôq#óÊº¤ã¯»æ´»êµºìµÀð½Âò½ÅúÂÈúÅËúÌÓúÐ×úÓÜúÓÝú×àúÕáúØáúÞâúÝåúÝæúÝçúÛåúÛéúÜæúÝèúßçúàéúßéúàêúàéúßçúãéúàçúáéúãçúãæúáæúßçúßèúÜèúÝâúÚæúÙâú×âúÖàúÒÝúØâúÔÛúÒßúÒÛúÒÜúÎÛúÎ×úÊÖúÉÕúÎÓúÈÔúÇÏúÇÍúÇÎú¾ÊôºÆò¼Çó»Ãì´½ç¯»ã¯»à¬ºÖ§®Ó¡¬Ì §Ä§¾¶®¬¡~zuoduYxrbtwbwsgklllåA±?f&ç!/ê'÷3ì(Â¢¡ÁªÅ¬â´µà¡®Ázz[gU{zd~]|izlikd{fli{`z_~{b~xY~r_{u[zd{{b{z`wbzirkfnfdgxnnd~tY{rOwrWzq]wq]uzb~zfn¬§¶¤±·ªº¾®½¾¬¿½­Á¾²¿À±ÆÁ¯ÀÂ­Â¿®ÀÁ¬Á¾°Ã¾¬½¼¬¾¾®Ã¾°Â¾¬À¿°¾¾­À¼­À½¯Â¾¯Á¿®ÂÃ°¾¾°¾¾¬ÀÀ­Â¿±Á¼®Á¼ª¾½­ÀÀ®Á¾®¾¼­¾¿®À¾­¾¾°¾»­ÁÀ¬¿½¬¿»­Á¿¯¼»­À¾­¾¼¬¾¾¯¿¾¯¿Á­¾¾®À¼­¾½°»Á¬¿¼¯Â½¬¿¾±¾¼¬Á¾­¿½­½»¯À¿°¿»®Áº¬¾¼­¿½¬À»­¿»¬¿¾¯½¼®¾¼¬À»«¿½¬¼¼¬À»¬¼¿¬¾¾¯¾¿ªÀ»¬¿¾«¾¼°¼»©»¼¬¾¹¬¾¼¬¾¼°½¼¬¹½ª¿º¬»»¬½¼¬½·¬»¸¬½¹¬½»«¼¸²½º§»»«½·­»º«¾·ª»»ª½¹¬»»©¼º©»»ª»»©¼»«½»¬¹º«¹µ§··«¹»­»º©¸¶ª¼»¥¸º¨¹´ªº¸§º·¨¼¸¨¸º©»¸«ºµ¬»¹¬¹¹¨º¶§»·«º¶¬¹¶¨¼¶¨·µ«·¶¦¹·¦»µ¥·¶§º·ª¹·¥µµ¨¶³§¶²©·¸ ¶¶¦»¶£¹´ª´³¦¹¶§·³§¶´¨·³¨´µ¤¹±¨µ³¦·µ§¸³¤µµ¥·¶¦·´¨´´¦´´¥·´§¹³¤·²¨·µ¦¶µª³²£µ¶§·°¥³´£¶³£·³¥¸³¢¶±¤µ¯¦µµ¤·´¤³°¥³®£¶³§¶°¥µ°¥¶³¢²®¤·²´³¤¶³£¶®¤³µ¡´±§´´§µ´¢±±§³³£¶°¤­®§´¤¨©­¦­¨¬¦³¨­§¯§±«±ª®©°¦°ª±«®¬²¬°©®ª®ª®©±¨­©­¥¯®®ª²¨³«³«°¤°§³©¯«±®²¬²ª²ª±¬µ©³«³©°®µ© °«¯¬¡²¨³¬´«®¬²¬²­´¬²±²®³¬³¯´°±¬³­³®µ«µ®·¬³­µ­²¬³®³®²¯µ®·°´¬±®¢·°·«·¯³« µ°¶®´­ ¶¬¶°·±¡¸¯·°¥µ²¤¶± ¸±µ±¡µ¯·®µ± ¸®¤¹²¼²¡·°¡¸²¡¶³¡¸­£»¯·³»±¢·³£¶³¤»°¡¹³¢¸³£¸³¢¸³¢º³¢¹±¦µ³¤»´¸±¤»·£ºµ¢»³¢¸³¢¸°¡¸²£»³·´£»²¦º²¢º´¥º²·³§¹³¤¹µ£¹³¤½´£»´¤·´£»³¦º¶¥º²£»´¦¸³¤»³§»³¤¸µ¥¾µ¨»µ¤»µ£ºµ¦··¤¼³¡¹µ¡»µ¤º·£½´©¼·¤¾µ§½·ª»·¨½¸¤»µ¥½µ©¾·£¼³¥»·¦»·¢¼µ¥»µ«¼´ »´µ¬¯§««©¤§¡~zxkow]z`xY{u[~qYziKzdQqfKqgOqdKnfQqgUqlSwfQtfIndInbIq`Dn_Iq`In]IqdSnkFqfMqbFoYDlYFkbWooWtgSogMiUFgIBbM?`ID`O?`K=_O?WO?_F?]I?_I:bO?[Y=`MDdQ?]O?`QFbYBfQIkÿO»HÿÂn«¹Æ¶¡å´¼ïµÃí·Æô»ËùÂÌúÆÐúÆÕúÊÙúÌØúÈÖúÈØúÊÛúÎÜúÓàúÒÝúÖàúÙâúÛäúÜäúÝåúÛãúÛäúÛäúÚçúÙåúÛãúÝæúÙäúÛæúÙâú×äúØàúØáúÕáúØáúÒâúÕÜúÖãúÕàúÓßúÓßúÑÝúÏÙúÏÙúÌØúÇÓúÃÐúÀÎúÄÍ÷¿Éò¼ÊôºÈó½Çô¸Éö½Êú¾ÍúÂÒúÊÖúÎßúÕàúÜæúÛäúÛçÝÝÌù#÷£Ü¾Ï(ô"ÆÂ£ì°Ã¾¿%òªÀÝ­¼ß®¸æ±»ç³»ï»Àò¸Æ÷¿ÆúÁÌúÆÒúËÓúÐÖúÐÜúÒÜúÒÝúØàúÖáúÖâúÙäúÛäúÙãúÛçúÕåúÙâúØãúÖäúÝäúßæúÜãúÝæúßçúÝæúÞåúÜåúáæúÝçúßçúÜäúÙäúÜãúØäúÔàúÕàúÒáúÓáúÐßúÐÝúÌÛúÊÜúÎØúËÖúÇÔúÃÕúÄÒúÅÒúÈÎúÆÎú¾Ëø½Êô¼ÆòºÆï·Ãè´Áæ²½á¬»Ü§¸Ù¥²Ñ£¯Ì«Ã¦À¢¶¬¬~ztog|x]toY|nUtrQrw_ro]må@­>`
÷"ð¦ÅfÛP,ê$¯Å©×£­Ì¤b_O~dKuqd|U{zdg```|Wu[|[x_uWtY~tYnUxqYxqYznYwr[|rY~rY|oWz|`~~`|[btd|`t`{ub~]u_|fUufKxgOokMxgUxoWxr]~|d£¤¯°°¡³·§ºº¬º¹¨¾º§Ã¹­½¼¬¿¼¬À½ª¾º­¿»¨½¼«¾»¬¾»«¾·©Áº¬¼¸©¾º«À¸ªÀ·«¾º¬½º«½¸¨½¸ªÀ»ª¿¸¬¼¹¬Á·§Á½§½¸«¾ºª¿ºª¾º¬Á¸ª»º¨½¹ªÀ¹§»¸§»¹¦¿º©¾º«¿·«¿¶¥¼¸¨¾»ªÀ·¦¼·ª½¸§À·©¾·©¼º§¾·«»·©¾¸©¾·«»»ª¿¶§¾´¨¸¶©»·ª½·¨½·§½µª¹¶©»¹¨½¶§º¶§»¸¨½·©»¶¥º·©¹·¨»µ§º·§º·©»·§»·¦¾³ª½¸¦¼·¨¾³¨¾·§¾²¦»·§»¸©»¸§ºµ¦»·¦»·©½¶©¹µ¦º´§»·§·µ¤º·¨»¶©¼³£»³¢º³¥·µª»´§»±«»³¥º³¨ºµ¤¹²¦¸³£»³¦µ³§º³¤·³¢º²¦¸²¡·³©¸¶¤¸´©¸³¤¸µ§·±¢ºµ§·³¢¸²§¹³¦¶³¢¸µ§¸²¡¸°£·³©¹³¦º²¢·³£¸°¦¶°¢µ°¡·³¢¹²¤·° µ®¢·°¡µ°¥·²£µ®¢²±£µ²¢·®¡³®£²±¢¶­¡´°¥·²µ¯´°¡´¯ µ¬ ´® °¬¡´®³®³­²°¡·®¡³¬ µ®¡³¬´°¢°¯¡®­ ³­¡µ«±® ³«£³¬²¬¡µ¬°«²­ ±®³« ±¬ ³­²¬²¬µ¬¬«°¬£³®²¬²­´ª²¬¯­¯«³¦ª­­°­¬¯¬°©¯­±«²®°ª­¯®¬®­ ³¯®¯¡²¯ ¯¯£³®³­³®¡³° °® °¬³¯±²°¯³¯¡³® ´°£µ³¢¯´¤³­¡µ²°°±¬¢³¯ ³±¢³°¢³²³² ³°´¯ °²¤³±¡µ® ³³¢´³§µ¯¢¶±¤´³¢³´¡¶®µ®³¯¤³³£³¯¡³² ´®¤µ²¢´µ£¶³¤´³ ¶²£·³¦¶³¡²±¤µ³¥³³¢º³¤³´¢·µ¦·±¤³´¤¸³¥¶¸¨¶³¢¶³¥¼¶¨·µ§¸µ¥³³©¸µ¥»µ©·³§¶¶¦·²§·¶§¸±¤»¶¦¹¹¥·³¥´µ¥¼´¡·¹§·¶©¼¹£·µ«»µ©º·¦¹´¦¹µ£¹¸ª¹¶¦»·¨·´§»¶¨¹¹§»¶¨º¹§º¶¨¸¹ªº¶¥¸·§¼µ§¹»¬¼¶«¹·«»»¨»·¦¼¸¨»»¨»º¬¾ºª¼º©¼·¥º¸ª»¸¬¼º¨½·§¾¹¬»¸¦¾»§»¹ª»»¬¼»®»»«·¸©¼¾¦¾º«¿º©»»©»¹¬¾»¬¿½¬¾»«À¸©½½¬¿»¨ºº­»¼ª¿¸§¼»©»»©¿»­¾º¨½¼­¼»¬»¾¨¿½­¾¼¬¾¹­À¾­¿½¬¾¹ª¸·¤¶®±¬±¬«¬¨¢£|ooff{`~{b|{`zw[wn[otSukSrlUqnWrn_oxY{rYwnWrlUtkMukKkdYrkQrkQokQnlQtnQnkUl]MkbQko[rt[ro]to[ibSnSDdUI`UObYM_UFbQI_YD`WF_QK_QB]YK][I_WMd_K_SF[[MgbIfÿO\ÿö
[truncated: 542,903 more chars]
