# Supplementary material for: 3D texture-based face recognition system using fine-tuned deep residual networks
Source: PeerJ Comput Sci. 2019 Dec 2;5:e236. doi: 10.7717/peerj-cs.236 (PMC7924501; doi:10.7717/peerj-cs.236)
Supplement: Supplemental Information 5 [file peerj-cs-05-236-s005.zip › Source files-part1-Only for checking-To PeerJ-examiner-Please Download this Zip∩╝îAll the source files in my Manuscript-3D textures based face recognition--Author-SIMING ZHENG/2---68-key-point--Source Document/01-files/ext1.ppm]

P6
# Generated by OpenCV 4.1.0
640 480
255
§ª©®«¯­¯­²­°¬®«­¬³¬°¬°«®¬°¬¯°²¯±°³¬°°¯®³¬³®±¬¯¯¢²°³¯¡°­³­²°°¯ µ°²¯²°³­³²³¯³°³³³± ³°¥´³¢´® °³¢µ°µ°¡·µ¤·³¡µ³´± ·²¡¶¯³²¥´³ ·° ´³¡¶°£¶±¡³²£·±¶µ¥µ¶¥µ³£¹³¡³²¡··¡´²¶³£·´£·³¡µ²£¶²¡´³¡·²¥·³§¹²¢¸µ§·µ¦¸·§º·£¶µ¢ºµ¡»µ£¸´§¸¸¦»´¥·´¥·¶¤»µ¥·µ¥··£¹´¡·µ¦¶·¤¸¸¥¸¶¥¸¸¦¹·¤º³§¸·¥»¸£º¶ª··£·¹ª»¹¨¶º§¸¸£¸·¢¹¸¤½µ¥¹·£º¸¨»¸©¾¹§¼·§»·¨½»§¸¸©»·¨º¹ª¼»£·¸©»»¦¼»¤»µ§¾¹¨½¹©½¹¬¾½§¼¹§¹¸¨¼¸¥»¸«½º¨¾¸«¾¹¨¼º§¼»©½»§»¸«¼»ª¾¼ª¼º«½º¥»ºª¾¸¦¿»¬¼¸§¾¹ª¾¸©º»©À¸¨¼¹¬À¼©¾½¨»¼§»»©¾º©½¸¬½»©¾¾­¾»©½ºª¼»ªÀ½«½¾«¾»«½»ª½½¨¾ÀªÃ¾«¾»©À»¥¾»¬½»«À¼¨¾¾¬¾½¬¼¾©Á»¬¿À«Á¾¬ÀÀ®½»®¾Á¬Á½«¾»«¾½©¾¾¬Á»ªÂÀ©À¾ª¾¾«½¾¬¾¾«Á½©¼Â­Â¾°Á½«¾½ªÁ½¬¿¾¬¾½«¾¾«¿½«¾¿¬À½ªÁÀ«Á½­Á¾¬Ã½­¾Á­ÀÆ­Â½«À»«Á¿«ÃÃ©Á¾°Ã¿®ÁÃ¬ÃÁ¬À¿°ÁÁ®Á½¬¿¿¬Á¾«Ã»­½¾¬ÀÁªÁ»¬Á¾­À¿®Á¾®Á»¬ÁÂ­ÂÁ®ÂÁ°ÁÃ¬ÀÁ©¾¾¬À¾®ÁÁ¬Â¿­ÁÂ¯ÂÂ°ÄÂ®Á¿®ÁÀ¬ÄÂ°ÃÂ¬ÄÂ«ÁÁ®¿Á®Ã¿¬Æ¾­ÀÁ²¿Ã¬Å¾³ÁÁ°ÃÁ°Á¿±ÂÄ°ÅÁ¯ÃÃ«ÅÁ°ÄÁ°ÆÁ­ÃÁ®¿¿¯ÂÁ°ÃÂ®ÃÂ°ÁÄ²ÃÃ¯ÀÁ­ÂÁ°ÃÁ¯ÁÂ¯Ã¾®Ã¾¬ÂÂ°ÃÁ°ÄÃ¬Á¿²¿Ã­Ã¿±ÂÀ±ÁÁ®ÃÁ¯ÁÀ°¿Á®Ã¾²ÂÁ±ÁÁ°ÃÁ°ÃÁ°ÂÂ³Â¿®Ã¿®ÁÀ®ÂÁ®ÃÁ®Ä¾²ÁÀ±ÁÃ¯ÆÃ°ÄÃ®ÃÃ®ÁÁ±ÃÃ°ÃÁ¯Ã¿®ÂÃ±ÄÀ¯ÆÁ²Á¾±ÁÂ°ÃÁ®ÀÂ°ÃÀ¬Ã¿­ÄÃ®ÁÃ®ÁÀ®ÃÂ²ÄÁ°Å¿¬ÀÂ±ÃÁ°Ä¾®ÁÀ²ÃÁ°Ã¾­ÄÁ²Ã¾®ÁÁ°ÅÁ°ÃÁ°ÃÁ°ÁÀ®ÂÄ¬Å¾°¾Á¯ÁÀ¬Ã¾°ÂÂ­ÂÁ°ÂÀ®ÀÃ­À¿²Ã¿®Á¾®¿ÁµÃÃ°ÃÁ¯ÁÂ¯ÀÄ°ÃÂ³Á¿®ÂÀ®ÂÂ­ÃÀ°ÂÄ®ÄÃ±ÃÁ³ÂÀ¯ÄÂ³ÃÁ´ÃÅ±ÃÁ³ÁÁ°ÁÀ®¾Ã°ÃÃ²ÁÁ°ÁÀ¬ÃÆ¯ÁÂ¯ÃÂ²ÃÀ®ÃÁ²Ã¿¬ÁÁ¯ÁÃ°ÃÀ¯Ä¿¯Á¿°ÁÃ°ÂÅ²ÄÁ²ÂÁ¬ÄÀ¯ÂÃ³ÃÂ®ÃÁ°Ã¾®ÁÀ¯ÁÁ­¿Á¬Ä¾±ÃÁ­ÁÀ²ÂÀ²ÅÁ°ÁÁ­ÂÀ²ÂÃ±ÃÁ®ÀÀ°ÃÁ®ÀÀ­¾½®ÀÁ°Å¿®ÀÁ­¿¿®Æ¿°ÁÁ¯À¾³¾¿«¿¾²ÂÁ­ÂÁ®ÂÀ®¿Ã®ÂÀ­À¿­ÁÃ¯ÁÁ¬Á¿¯À»®¾Á®¾Â¬Ã¾¬¿½®¿¾®À»¬¿Á°Ã¾­¿½¬¿½®Á¾«À½²Á¾¬À¿±¿¾¬¾¼«½½¬¿¾¬¾½¬Á½­¾¾®¾¾­¾½«¾¼¬¾¾®¿¾«Á¾¬Ã¾¬¾½«À½®¿½®¾Á­¾¼«½¾°¾¿®¾»«¿¾®¾À°ÁÀ®¿¼­¾¼°À½°¾»­¾¾­»¾«½¾¬¾»®½»«»¸©¼»¬¾½¬¾¼ª»»­¼½¯Á¸¬¾»®ºº«»»«À»«»º¬½¼¬¾º©¼º­½»©¾¹ª½¹­½»©½¸©½ºª½½«»º©»»«¾»«»º«»¹ª»¸¥¸¶¥··¨º¸©·¸¨··¡¸·©¸¶¥¹¹¨·º¤¹·¥¹µ«»µ§¸·¦¼º¬ºº©º·¦µ·¥¹¶¥»º©¸·¨¸¶§»µ¤»³¨¸¶¥¹·¤·¶¥·µ©¸´£¸µ¨º·¦·µ©¹¶¤·³¥··¥º³£¹³¤·²¤¶·£¹²¤µ³§·µ¥·¶¦µ³¥¸·¡¸°¸·£¹³£·³£¸µ£³²¦´±¤µ³£·³¤·²¥·°¥·´ µµ¶³¦µ´£¶³´²¤³³§µ¯¢µ®¢²³ ³µ¢¶²£µ®¡³¯¡µ°¤³® °± µ±¡±°¤³¬µ¯±­¡³®¤µ³ ±­ ´±£±°¡³®¡µ° ´® ´°¥°²¢³®²°±² ®± ¯¯¯­¡¯° °¬¤³­¡³®¡®¬ ®¬²° ®°¯¯®®°­¡°«®¯°¯±¨­®±®±¬±«°®¯®®¬°¬³ª«¬ ¯¬¬¬¬«¬®®«¬«­©°§­©¬©­¯««¬§®ª­ªª©¬¤ ­¯¦´°¡µ³¥µ³£¶´¤·³¥·­¤¸°¤¸³¤¹°¡·¯£¶³¢µ³©¶²¡¶³µ³¥´®¦º¶£µ³¤µ² »°¦º³£¸³§»°¥·²§·´¦µ¯©·²¤·²§»³¨º³¤¸¯¦»µ¨¸´¨º°¥··£¹³¨»³¤·µ¥¼³£½µ©·¶¦½µ¦»´¤¶·¦¼´¨»³¬»µ¥»¶§¼·£ºµ§º·¦¼´§»»ª»µ¥Á¸ª»³¤»¹¨¿»¨º´ª»»§À¸¦½¶ª½·©»µ©¾·¬¾·§¹¶¬¾·ª¾·¨º¹¨À·«½·¯¿¸ª¾·§»»­Á»ªÀ¹¬½»ªÀ·©¿¹®Àº¬Á¹¨¿¸«º»®Á¹«¾¶¨À¸¨»¹¨¼½¬¾¶¨Àº«¾»«¼¸¬¿¸¬Á»©¿»®À¼«Á»¬À»²¿¼¬À¼¬Á½¬Â»¬Àº¬¿¼ªÁ¸ªÄ»­Á¼¬Á¼¬¾»¬Á¾­Á½®¿½¬Ã»¬À½±À¾¯Â¿®Ã¾¬Á»®ÁÁ¬Á¿°ÃÀ°Â¼³Ã¿±Á½°À½ªÅ»­Á¿°Á¿­Ã¿®Ä½®Ã¾­Æ»®¿½¯À»­Â¾¬Ã½¬Æ½¬Å½¯Á¼®À¿­ÅÀ®Å½¯Ä¿­Æ¿°Ã½±ÃÀ®Æ¾¯Â½®ÅÀ±Å¿¯ÅÀ³Ä¿¬Ã¼°ÆÁ°Å¿«Ä¾®ÂÁ«Á¼­Ã¾­Æ¿­ÃÃ²Ã½²ÆÀ¯ÁÁ²ÄÁ®Ã¿°ÂÁ¯ÁÁ®Å¿°ÅÀ²ÅÁ±Ä¿°Ä½¯ÃÁ®ÁÃ²ÅÁ³ÆÂ¶Ç½®ÅÁ±Ç¿³ÆÁ¯Ç¾±ÃÃ³ÇÃ³Å¿³Æ¿³ÇÂ±ÃÁ³ÆÀ´ÆÀ³ÇÃ·Ç¾²ÆÃ®Æ¿®ÈÂ³Å¾³ÆÁ¯ÅÀ­ÃÁ±ÆÁ²ÈÀ°ÆÁ´ÄÂ³ÈÆ¶ÇÂ³ÅÂ³ÊÄ¯ÄÅ·ÈÅ³ÅÁµÃÁ´ÆÃ³ËÁ²ÅÃ²ÉÁ´ÅÅ¶ÊÃµÇÂ±ÆÅ³ÄÁ´ÆÁ³ÆÄ³Æ¿µÆÃ±ÈÆ±ÈÄ³ÆÅ°ÈÁ·ÇÃ²ÉÁ³ÇÆ´ÆÅµÇÃµÇÆ°ÄÂ¶ÇÄ´ÆÂ¶ÃÂ¯ÆÂ´ÆÅ´ÆÆ³ÅÂ±ÈÂ³ÇÄµÈÁ³ÇÆµÆÅ¶ÆÃ¶ÆÃµÈÃ±ÈÅ·ÈÈ³ÊÆ´ÈÂ³ÊÃ´ÈÊµÊÂ·ÈÈ¶ÊÆ´ÉÃ³ÊÅ³ÇÅ´ÇÃ³ÈÅ¶ÆÃµÈÃ´ÈÄ¶ËÅ¸ÊÇ¶ÊÆµÈÂ·ÇÄ·ÊÃ·ÆÆ³ÈÅ³ÉÁ³ÊÅ³ÌÄ¶ÈÅµÆÂ¶ÆÆ±ÊÆ³ÇÆºÉÅ³ÈÁ±ÇÃ·ÈË¶ÈÅµÈÂ¶ÈÅ¶ÇÄµÊÅ´ÊÆ´ÄÃ·ÈÃ·ÈÃ·ÈÄµÌÃ¶ÅÆ¶ÇÃ´ÇÅµÊÅ¹ÈÈ·ÈÇ·ÆÃ¸ÉÆ³ÈÈ¶ÈÄ¶ÈÆ·ËÄ·ÊÅ·ÈÃ¶ÊÆ·ÊÅ³ÇÃ¸ËÆµÅÂ¶ÊÆ¶ÆÆµÉÁ·ÈÂ·ÉÅµÆÃµÄÅ·ÊÇ·È¿³ÆÇ·ÇÅ´ÌÃ³ÇÃ³ÆÅµÈÉ³ÊÃ·ÃÅ³ÊÅ¶ÇÃ³ÈÆ´ÈÂ·ÇÃ·ÆÈ³ÇÂ·ÈÅ´ÈÅ´ÆÆ³ÉÃ´ÊÅ¹ÇÆ³ÈÆ·ÆÃ¶ÇÅ²ÈÃµÊÃµËÄ³ÈÃ³ÆÅ¸ÈÇ°ÆÂ¶ÇÂ¶ÇÅ·ÊÄ´ËÅ³ÇÆ´ÊÆ·ÈÅ·ÆÁµÇÃ´ÇÆ¹ÆÆ¶ÆÃ³ÈÆ´ÇÆ·ÊÃ¶ÊÇ³ÇÂ¶ÇÅµÌÆµÈÁµÆÈ³ÈÆµÊÃ·ÆÂµÈÃµÆÃµÆÆ·ÊÃ¶ÈÁµÊÆºÉÃ³ÉÃµÅÄ³ËÅµÈÆ¶ÆÃ´ÅÆ±ÆÃµÇÃ¸ÃÆ´ÉÂ²ÈÆ¹ÈÆ·ÌÁ³ÅÅµÆÆµÊÆ´ÈÃ´ÈÄ´ÈÄ³ÄÃ²ÊÅ³ÆÁ³ÇÆ´ÂÅ¶ÆÄ´ÆÆ³ÄÂµÆÃ®ÆÂ¶ÆÃ³ÈÈ¶ÊÆ·ÈÈ³ÈÃ³ÈÄ¹ÈÂ¶ÈÅ´ÈÃ·ÅÃ³ÆÆµÆÃ´ÅÁµÆÂ´ÈÃ·ÅÃ³ÈÁ¶ÆÁ³ÅÆ³ÄÅ³Ã¿²ÄÃµÆÁ°ÄÁ´Æ¿³ÃÁ´ÅÂ³Å¿´ÁÂ³ÅÅ³ÃÃ°ÆÁ¶Å¿°ÃÀ³ÅÀ¶ÄÁ³ÆÁµÃ¿´ÆÃ³Ç¾µÇÂµÆÃ´ÆÂ¶ÅÁµÅÃ´ÇÀµÅÁ¶Å¾µÆÁ³ÃÀ³ÃÅ³ÅÃµÆÁ²Ã¿´ÅÂ°Å¿±ÁÁ²ÂÀ¯ÅÀ¯Ã¼²Ã¾­ÅÁ±¿¿´Ä¿²Ä¾µÁÀ°ÂÁ±Ã¿±ÆÁ´Ã¾³ÃÄ°Á½±Á¾°Á¿«Á»²¾»°Á½®Á¼­Á¾³ÀÂ±À½²Á¾¯Á»²Â»¯¾»¬¿¾¬Â½®Âº¬Á»¯¾¼­¿»¯Á¼«¿¹¨Á»°¾»®¾¹¬¿¹­½»­Â½¬Ã»¯½¹­Á¶¥¾»©¿·«¾½¬¼»¯¿¹®¿·¨À¶¬»¸¯À·­À»­º¸­½»¬¿º©¿·ª¿º­¼·ª¿·¬½¹«¾´¥»·ª¾¶¨º¸©¾·ªº·ª¾·©¿³©¹¹§¼¹ª¾·©½¹­½·©»·¬»¸¨¼´§»³«»·§»´©¾¶¨º´«º¹«¿³§»´«º·ª¹³¦¼´§»±©»³¬º³ªº·ª»·§»³¨·³¬¹³«º³©¼³©»¶¨¸´¨»µ©»µ¦½³©¹³©»³¬»·¥·µ§½¶«¶³ª»³ª»µ¤»·§¹¶¬¸µ¢¹³§»³©·´£¹²£·°§·´©¸±¨µ³¥¶±¥¶³¨µ±£·²¨´²¦¶¬¤µ±§·°¢¶®¥µ²¨¶±·±¨·±¦´³¦»¯¤º¯¥µ³¢¶°¦·¬¤³¬¤·­¤´­¥´±¤·³¡³­¥µ¬¤³®¡³¬¦´²¥´±¥¶¬ ³­£¶¯¤µ±¥²¯£³¬µ­³­¥²¯µ§«­²¯¯°²®³²¢±°³°²° ³³²®³®´²³° ³­³±³±¢´®³°³²¤´¬µ² ´°¡µ³¡µ² ³°³±¢µ°£·²¡µ°²²£µ±£·³£´±£·³¢µ³£¶´ ¸´·²µ²¢¶³¡¶µ¸³ ·²¤»³ ¶²£µ´¡¶´ ºµ¦º²¢¸·£¹³£·²¢¸µ£¸¶£·´£¹µ¢¸µ£º·¦¸·¢»·¤¹·§··¢¹³¦¹³§¸¸¦º¸§¹´£¸·¡¹·¦»µ¥º»§½¸§¹¸¥½¶£¼·¥½¹©»¶¦»µ¥»·¥»·§¾µ£¸¸¤½·¥¼ºªº·§¹µ¨»¸§¼·¤½¶¨¸·§½¹£¹¹§¹·§»º¥»»¨¾¹«¼¹§½º©½¼¬»¸¦»»ª½º¬»»¦½º§¼·©¾º§¼¸ª»·§¿»¡¼»©¾»©Á»©¾·§½ºª¿½©½»©¾»©»»ª¾¾­¿º¬¾¾ªÁ»ª½¾¨¾»©Â¾«¿¼¬Á¾­À¾©Á»«¾¾ª¿¾¬Â¼­¾»«À¼«Á½¬¾¾¬¾½§À»ªÁÀ¬Ã»¬À¼ª¾»«½½­À½¬Á½¬¾½«¼¾«ÁºªÁ¾ªÁ½¨¾»§Á¼«Á¾ªÄ½¬À¾¬Á½®Á»­Á¼«Â¾«Á¹ª¾»­ÁÁªÄ¾®Á¿¯Á¾«Ã½¬¾Á«ÃÀ¬¿¾«Á¾®ÃÁ«Ã¾­À¾®Â½­Ä¾­Ã¾®ÁÁ­Ã½°¿Á¬ÃÃ­ÃÀ­ÅÁ®ÂÀ¬Ã¿¬ÁÁ¯Á½­ÄÃ­Â¾®Ã¾®ÄÁ®ÂÃ¯ÈÀ®ÃÁ¬ÄÀ«ÃÅ®ÄÃ®Â½¬Á¾¬Ä¾¬ÂÀ¬Ã¾¬ÃÀ°ÄÃ®ÂÁ±ÃÀ¬ÃÀ¬Ã¿±ÃÁ®Ã¿®ÃÁ¯ÃÂ°ÄÁ°Ã¾¬Ä¿«ÅÀ°ÅÀ¯ÄÃ¯ÂÃ¬ÆÃ°ÆÁ­ÃÃ°ÃÂ°ÈÁ¯ÁÁ°ÆÁ­ÂÂ¬ÅÅ¯ÄÃ¬Å¿±ÅÁ°ÄÇ±ÆÁ®ÁÄ®ÅÃ®ÂÃ²ÁÁ°ÄÃ­ÃÅ²ÄÃ°ÃÄ±Ã¿³ÆÀ®ÃÆ°ÆÃ¯ÆÃµÃÃ®ÈÄ±ÆÁ®ÁÁ²ÄÂ®ÆÂ²ÆÃ´ÅÃ±ÆÃ±ÃÅ³ÈÅ°ÄÄ±ÈÆ³ÆÄ±ÇÄ±ÆÃ·ÄÃ³ÆÁ³ÅÃ·ÆÄ±ÆÂ°ÄÆ³ÅÄ±ÅÃ²ÃÃ²ÇÆµÇÁ³ÄÄ³ÃÁ°ÈÇ²ÉÂ±ÇÆ±ÄÅ¯ÇÂ±ÆÄ±ÄÃ®ÅÄ®ÁÄ°ÆÁ²ÆÃ°ÃÃ³ÆÆ°ÈÁ¯ÇÃ´ÃÄ³ÅÄ³ÆÅ³ÇÆ¯ÅÁ®ÆÃ³ÆÃ³ÄÆ±ÅÂ°ÆÂ®ÆÂ±ÃÂ²ÆÄ°ÄÄ¯ÆÂ·ÆÄ²ÈÄ·ÆÃ²ÅÃ²ÅÃ³ÈÁ±ÆÆµÆÄ²ÉÃ°ÃÃ®ÇÆ³ÇÅ³ÇÃ³ÆÆ®ÁÆ±ÄÅ³ÇÄ±ÆÃ²ÇÃ´ÆÆ³ÆÃ®ÃÂµÄÃ²ÆÃ­ÃÂ´ÆÃ³ÆÆ®ÆÁ°ÃÃ´ÆÄ¬ÆÅ±ÃÃ²ÃÄ±ÃÀ¯ÄÄ²ÄÁ²ÇÄ³ÆÄ¯ÅÃ²ÆÃ³ÄÃ±ÆÂ´ÆÃ²ÆÄ³ÈÄ®ÂÂ°ÆÄ²ÅÅ°ÅÄ±ÄÃ²ÆÅ±ÆÄ¬ÃÀ¯ÄÅ±ÈÄ°ÇÄ±ÃÃ¶ÆÆ¯ÃÄ³ÄÄ°ÄÃ°ÆÆ¯ÆÄ°ÇÃ­ÆÃ°ÂÅ³ÅÃ³ÃÄ³ÆÁ°ÆÆ±ÆÅ³ÆÀ²ÈÁµÄÄ³ÅÄ²ÃÅ°ÃÃ²ÆÃ³ÁÁ³ÁÃ¯ÄÃ²Á¿³ÄÃ³ÄÄ±ÆÄ±ÈÃ°ÆÄ°ÇÆ²ÄÂ±ÄÅ±ÂÃ¯ÃÅ²ÅÃ²ÃÂ²ÃÆ´ÆÃ³ÇÃ³ÈÂ²ÄÄ®ÆÄ³ÃÃ°ÄÃ³ÆÃ²ÄÄ³ÄÄ°ÄÀ±ÄÄ±ÅÁ³ÅÄ³ÃÁ±ÆÄ²ÆÁ²ÅÁ±ÄÀ±ÂÃ²ÄÇ²ÃÄµÄÆ°ÆÃ²ÆÆ³ÆÃ¯ÄÃ±ÃÃ²ÆÁ±ÁÂ®ÂÁ²ÅÄ°ÄÁ²ÄÄ°ÁÀ®ÃÄ¯ÁÁ­ÆÆ®ÁÀ°ÂÃ²ÃÃ²ÂÁ°ÃÀ¬ÁÃ°ÃÁ¬ÁÃ°ÀÃ³ÃÃ­Ã¾¯ÃÁ²ÁÁ¯ÁÃ­ÃÂ¯Á¿¬ÁÀ°ÃÀ¯Ã¼®ÃÀ°ÂÁ¬ÁÀ¯ÁÀ°ÄÂ®ÁÀ¯ÆÂ²ÂÃ³ÃÁ¯ÁÀ®ÃÁ±ÃÀ¬ÁÄ¬ÁÀ­ÀÂ°ÁÀ¯ÁÁ®Á¿²Â½³Á½®À¿®Á¼«À¾®¾¾®ÁÁ«¾¾¬½À®¾À¯À¼®¾½¬À½¬¿À­À»©¾À­Â¾®¾½®»¾¬Á¾°À½¬»¼«Á»¬¾½«¾½­À½ª½»®Á½©¾¾¬À¹®»»§¾¸ª½º¨»¾«¼¹¬½ºª»¹«»¼«»ºª¸»¨»½ª¾º§¾»¬»¹§½»¨½¾¬¼·¨½·§»¼ªº¸¬»¸§»·¨º¸§½¹¨º·¦º·¥º¸¥»·«½·©»º§»¸¦»·©»»¦¹¹©º¼©½·¤»³¦¹µ¥º¶¥º·ª¸±¡º·¢¸·§¹²¤¹¸¤ºµ§·¶§·³¢¹µ¢¸³¨¶¶¤µ·£»³£·´¥··¥¹³§·±¥·µ¥º´¤¸µ§¸µ£¹µ¥·µ¥¸µ§µ±£·²¦¸³£·²£·µ¦·³¥µ·¥·±£µ²¡·²£·²¦¹³¢µ²¡¶°§¶´§¸µ¡·±¨·³¤³³¢µ²¥·°¡¶·£´µ¦·°£·´¡¶³¤·´£·±£³²¶°³± µ±¢µ°¢³³¡²±µ±³­¢³³¡³­¢³³ ³®µ®£°±¢µ°²­¡´°¡²¬³®¢²¯£³²°®¡³¬¡®¯¡²°±¯¡±®¡µ­­¬¡¯¯£´­±­ ®«±¬®¬±®²®°¯®©¬® ¯¬°­¯® ³±¥µ¶¤¸³¤¹³¦·µ¤¹³£¹°¢¸³¦·µ µ°¢·µ ·³¢»´§¸µ¨·µ¦º³ ¸³§¹¶§»³§¸²£º´¨º´§¹µ§¶´¦»·¤¹³¨¹³¦º³¥¼µ£¹³§½µ§¼´¥¸¶¤»·¨»³§¼µ¦¿µ§¼µ¨»³ª»¶¦¼¹§»µ«»¸£»´¥¼¶©¼·§¿·ª¾¹¬¾¸¥¾»¨¾·«¼¹§¼¸ª¿·¦½¹¨¼¶§Á·ª¼º¬½º¦¼·ª¾¹¬½·©¿ºª½»¬¾»ª¿º¦¿·¬½¹¨¿»¨¿¹ª¼¹ªÀº¬Á»ªÁ½¬Â¸®¿ºª¾º°Ã¼«Á»®Á»«Ã½¬À»«Áº«¿¼¬Ã¼¬¾º®À¼«Á½®Ä½­Á¿®Á¼¨¾¼¬À½¬Ã½ª¿¼­Á»¬Á¾¯Ã½°¿¿¬Á·¬¾¼¯Á¿³Á»¬À»¯À¾®Ã»°Ä½¯Á½°ÃÁ¯Á¿®Ã¼¯Ã½¬Â¾±Ã»±Ã¾¬Â¾¯Ã¿¯ÅÁ¬Â¾®Å¼®Â¿¯ÅÁ°Æ¾°Ç¿²ÇÂ³ÃÀ±ÆÁ³Ä¼®Ä¾³Ã¿°ÅÁ¬È¾±Æ¿­ÆÀ¬Æ¾³ÂÃ¯ÂÂ­Ç¾­ÃÂ±Æ¾³ÆÂ²Á¿°ÆÁ±ÆÀ²ÆÁµÅ¾°ÆÀ±ÇÀ°ÇÁ°Ã¿°Â¿±Â½°ÅÁ­Å¾³Æ¿±ÃÂ³Å¾®Å¿³ÇÁ­Æ½°ÃÃ¯ÉÀ°È¾³ÆÁ¯ÅÀ¯ÄÃ´ÅÀ¯ÇÁ²ÈÂ²ÇÁ³ÊÃ²ÅÁ°ÇÂ³ÆÁ³ÊÀ±Å¿°ÆÅ³ÈÅ±ÇÀ¯ÈÁ²ÈÂ¶ÇÅ³ÆÁ³ÊÄ°ÆÃµÊÁ°ÇÂ³ÈÃ´ÇÁ¯ÇÆ³ÉÂ³ÈÂ³ÅÆ³ÈÃ°ÇÃ¶ÉÆ°ÊÁ²ÆÁ´ÌÂ²ÈÁ²ÆÂ³ÊÅ´ÆÆ´ÊÃ³ÈÁ³ÈÃ´ÈÂµÉÃ´ÊÂ³ÊÆ´ÈÄ³ÇÅ±ÊÃµÈÃ³ÉÂµÈÆ°ÊÆ¹ÍÇ¹ÊÆ±ÇÃ·ÉÅ·ÌÄ³ÌÆ¶ÊÄ´ÉÆ¶ÆÅ³ÊÈ³ËÃ¶ÊÃ¶ÊÆ¹ÈÈ³ÌÆ·ÊÆ³ÈÃµÈÃµÉÆµÉÄ³ÊÉ·ÉÇµÊÃµÊÆ¸ÈÆ´ËÉ´ÊÅ·ÌÊ¸ÉÆ¸ÊÅ·ËÃµÈÆ¹ÊÆ¶ÈÅ·ÉÅ·ÊÈ¶ÊÈ»ÌÇ¹ÌÆºÊÈ·ÌÆ¹ËÇ¶ÊÅ¶ËÊ·ÌËµÊÃ¶ÉÆ·ÍÆ¶ÊÈ´ÊÉ·ËÊ·ÈÉ»ÌÊ»ÊÊ¹ÉÅ·ÌÆ¶ÌÇ¹ÊÅ´ËÃ´ÈÊ¹ÌÇ¶ÌÃ¶ÈÆ·ÉÈ³ÌÆ·ÇÉ·ÇÆ³ÊÆ³ÈÈ·ËÄ³ËÅ´ËÆµÆÇ·ÊÅ³ÊÇ¶ÈÈ·ËÆ¸ÉÅ¶ÌÆ²ÊÅ·ÊÆ·ÊÇ·ÊÆ¶ÊÇ¸ÌÈ·ÈÆ¸ÉÅ»ÊÈµÊÈºÍÆ¶ÉÄ·ÉÈ·ÍÈ¹ÈÉ¹ÉÈ¹ÍÆ¶ÈÉ·ÌÆºËÈ¹ÎÈºÎÊ·ÈÅ¹ËÆ¹ÆÈ¹ÌÈ·ÌÈ»ÉÇ·ÈÆ´ËÊ·ÈÆ·ÌÆ³ÈÈ·ÉÈ¶ÊÆ³ÉÅ¶ÉÊ·ÌÇ·ÈÈ¶ÉÆ·ÊÈ¹ÉÈ·ÊÇ·ËÅ¶ÊÈµÊÆ»ÊÇ¶ÌÅ¸ÈÈµÊÆ¶ÈÆ¶ÊÆµÌÈ³ÉÇ¶ÊÇ¸ÉÆ¶ÍÃ³ÉÆµÈÆ´ÉÅ³ÈÆ¶ÈÈºÊÇ·ÇÆ´ÉÉ»ÎÆµÈÇ¶ÇÅ³ËÈ·ÊÈ¸ÌÃ¸ËÆ³ÈÊ»ÈÈ½ÌÆ·ÊÆ¸ÉÆºÌÅ¶ÊÈ¹ÊÇ¸ÈÈµÉÅ·ÊÆ¹ÇÆ¶ÈÇ¹ËÈ¹ÉÉ³ÅÇ¶ÊÇµÉÆ·ÊÅ¸ÊÅ·ÈÃµÈÈ·ÌÆ¸ÊÆ¶ÈÊ¶ÉÅºÌÆ·ÊÇ·ÌÈ¶ÈÅºÊÇ¸ËÈ·ÇÅ¹ÊÆµÉÈ²ÉÆ¹ÈÃ¶ÌÆ´ÈÆ¹ÉÆ·ËÅ¶ÇÆ·ÈÅ³ÇÅ·ÈÇ¶ÉÆ·ÊÉ¶ËÆµÇÆ·ËÆµÊÈ´ÉÆ¸ËÉ·ÌÈ´ÈÄ¶ÊÇ·ÊÈ·ÊÆ´ÆÇ¶ËÅ·ÈÅ³ÈÅ¶ÉÅ·ÈÅµÊÆ¹ÈÆ´ÊÅ¶ÆÂµÈÃ·ÇÂ´ÇÁ¶ÇÆ³ÈÃµÉÁ·ÊÅ·ÇÅ³ÇÅµÈÅ·ÇÃµÊÄµÆÆ¶ÇÃ²ÆÅ³ÇÄ¶ÆÃµÆÄ¸ÉÂµÈÆ³ÉÃµÈÃµÉÃ³ÈÁ·ÈÆ¶ÉÆµÉÃµÉÆ³ÊÃµÈÁ³ÆÆ´ÆÅ´ÈÃµÅÄµÆÄ²ÆÃ³ÄÁ¶ÅÆ¶ÆÁ´ÅÁ³ÃÁ³ÆÁ±ÃÂ±ÄÁµÆÂ¯ÇÁ´ÃÅ²ÃÂ³ÆÂ³ÄÃµÆÁ±ÉÂ³ÆÁ³ÄÁµÄ¿±ÁÁ°Ã¿´ÆÂ´Ã¿³ÃÀ°ÄÁ±ÅÁ°ÃÀ³Â¿­ÂÂ³ÁÃ³Ã¿³Á¾¬ÃÁ¯Æ¾²Æ¼±À¾®Ã¼®Â½³Ã¾¯À½®Á¼³Á¾°Â¼¬Á»¯¾¼°Á¼±Á¼¯¿º°Á¾®Âº®Ä»²À¹¯Ã¾¬Â»¬Á½¬Â¹¬¿º¬À»®Ã¸®À»®¿¼ª¿¼¬Àº¬Áº¯À¿ªÀ½¬¾»¬¾»¬½º¬À¶«À¸©¼º¬¾·ª¾¾«¿·ª½»«½º¬Áº¬¿¹¬»·©¾»ª¼º¨¿¸«¼¶«¼¹¬½¸¦»»ª½·¬»·«¿¼ª¿·©½·ª½¶¨»¸¬¼¹¬¼¶«¹·¬¼µ©»»«¾·¦¿¹©»¹©À»¨¾·¨»¹®¿·§»³ªº·¬º¶©¼µ«»¶¬¸µ§¼·¬º·¬½·§»³©¼´©¼¸¦»¶©»³ª»¸©¼¶ª¼´¥º¶¦»¶¨¹µ§»´¦º¶¡¹³¤¶µ£¹³¢·³¦¸³¤µ³§¹®§·°¥¹°¦¹´¥´±ª¹³£¸±¦³°¨·²¢·³¦´¯ª¸°¶±¥µ²¤µ²§¶¯¤³±¤µ°¥·® ¶±¦·±£´±¥¶¯¥³°¤µ³³¬¢´±£¶¯¡¶¬¢¶­¤µ³¤´­§·±¢µ©¯±²± ³³¡´³³³¡·²³²£³´¢¶®´°³²¢¶µ£µ³·°¡µ² ·²¢³² µ³£·´¡µ±¥µ² ¶³ ¸´£·³¥·³¢·¶¢·³¡··¦¹³ ¸´¥µµ¶µ ¹··µ£¸´£»¶¤¶µ »·¥¶¶©¸µ¤¹·£¸³¢·¶£»·¦¹´¡¹µ§··¤»µ¥¼¶¢··¤¹¶¤»´§»·¡º·§»·¦½¸¢¾¸¢¼µ¦¸¸§½¸£¾·¦¾º§¼´¦º·§¼·§º·¥»·¦½¹ªº¸¦»·¢¹·ª»»¥½µ¤»·§»»©¾º©¾·ª½»ª¿º¦»»§¼º£¾¹§½·¬½ºª½¸§»·¥»»«¾»©½º©¼º¨Àº§»»ª»»©¿º©Àº©½¼¬¿½§¼»ª»º¬À½ªÀ¼ª¿¹¬¿¼«Á»§½»©½»©À¼«¾¼«¿½«Á¼«¾¼­¾»¬Á¾¨¾º¨À¾¬¾½«Á¾®Á½®À¾ªÁ½¬Á¾¬Á¾±Á½«Ã¾¬ÃÃ«Â½­ÀÁ­À¾®Å½¯Á¿­ÁÀ¬Â¿¬Â¾¬Â½¬ÁÁ­Ã½«Â¾¬ÃÁ¬Ã¾®ÁÁ®ÄÀ­Ã¾°¿Á«ÃÂ¯Å¾«Á¼­ÁÃ­Á½©ÃÀ®Ä¼«Á¾«Á¾¬ÁÀ®ÃÁ¬Á¼¬Á¾¬Ä¾©Á¾¬ÂÂ®ÁÀ®ÄÁ®¿Â¯ÁÂ°ÁÁ®ÃÁ°ÂÁ°ÃÁ®Ã¾¯ÅÃ¯Ä¾®ÀÁ°ÃÀ®Ä¾­ÄÁ¬ÃÂ°ÆÃ¯Æ¾®Ä¿®ÄÁ¯ÂÃ¯ÃÂ°ÆÃ®ÃÃ¯ÅÁ±ÆÀ­ÅÁ¯ÆÂ²ÄÀ®ÇÁ®ÃÃ²ÃÂ³ÈÄ³ÃÀ³ÆÃ­ÆÁ°ÅÁ³ÈÅ±ÇÃ±ÃÁ°ÆÃ®ÅÁ°ÃÁ²ÄÁ±ÆÁ®ÆÀ°ÆÃ°ÄÂ°ÃÆ°ÆÂ²ÆÀ¯ÆÁ°ÃÄµÆÃ°ÆÂ¯ÄÃ²ÈÄ´ÇÆ±ÄÂ±ÆÄ°ÈÅ²ÆÃ´ÉÂ²ÆÆ®ÆÆ¶ÇÄ²ÆÁ²ÅÄ²ÇÄ³ÇÆ²ÇÅ²ÇÄ²ÆÃ°ÆÄ°ÆÃ²ÄÄ²ÈÇ±ÈÁ±ÆÅ®ÆÁ³ÈÆ²ÆÄ³ÈÂ²ÅÇ²ÈÆ²ÇÃ´ÆÆ²ÆÆ²ÉÃ²ÈÇ±ÆÉ´ÉÅ±ÊÅ³ÈÇ´ÇÄµÇÊ¸ÆÅ³ÈÄ²ÅÃµÊÆ³ÉÇ³ÉÃ´ÈÆµÇÄ³ÆÄ³ÈÈµÊÇ°ÈÆ²ÅÈ·ÌÄ¶ÈÆ¶ÉÉ·ÊÈ³ÈÇ³ÈÆ³ÆÈ³ÇÅ³ÆÅµÈÆ´ÈÆ°ÈÄ¶ÈÇ´ÉÃ±ÆÆ²ÈÇ°ÆÅ³ÇÄ³ÆÆ±ÈÄ´ÇÁµÆÆ³ÇÈ±ÇÄ°ÅÄ°ÈÄ³ÇÆ³ÈÅ³ÅÈ³ÆÆ³ÆÃµÇÇ³ÈÆ¶ÆÈ·ÉÉ´ÈÈ³ÆÆ´ÊÇµÈÈµÇÊµÈÅ´ÈÄµÉÆµÆÇ³ÇÈ´ÆÈµÊËµÈÆµÈÆ·ÈÆ³ÈÈ·ÆÇ·ÆÄ´ÅÆ³ÅÅµÇÇ¸ÆÉ³ÇÇ´ÉÈ·ÆÈ²ÇÃ´ÆÅ³ÇÇ°ÊÇ²ÇÅ²ÅÇ±ÊÈ²ÈÆµÈÈ³ÇÈ³ÈÆ·ÈÄµÈÆ´ÈÃ·ÇÆ³ÆÃµÈÃ³ÇÇ´ÅÃ´ÈÈ³ÅÅ²ÇÅµÇÇ´ÆÆ´ÈÄ´ÇÄ²ÆÆ´ÆÄ°ÇÃ±ÇÁ±ÅÆ´ÈÄµÇÈ´ÉÃ²ÈÆ²ÈÃµÆÇ³ÆÈµÆÇµÄÄ±ÈÈµÇÅ¶ÇÆ·ÈÈµÇÅ³ÇÆµÆÇ³ÈÆ·ÆÆ´ÄÇ±ÊÆ·ÈÆ·ÈÈ´ÈÆ³ÇÅ´ÃÆ´ÈÅ°ÅÆ³ÆÆµÈÅ²ÆÆ²ÈÆ³ÈÈµÆÅ´ÅÄ·ÇÇ±ÈÅ·ÈÇ·ÉÇ´ÉÆ³ÇÄµÆÅ¶ÅÅ²ÇÆ²ÅÈ´ÆÊ·ÇÄ³ÆÆµÆÆ·ÈÄ³ÈÂ±ÈÆµÆÆ³ÇÅ¶ÈÆ´ÆÄ°ÉÅ³ÆÅ²ÇÀ²ÇÅ³ÅÅ³ÄÆ´ÆÅ³ÈÅ³ÇÇ³ÆÃ³ÆÃ²ÈÃµÆÆµÆÆ²ÈÁ¯ÄÅ´ÅÆ³ÆÆ²ÅÃ´ÃÅ±ÇÅ¯ÄÄµÃÇµÆÄ±ÅÃ²ÂÅµÆÁ­Æ¿°ÁÅ²ÃÅ³ÈÂ°ÄÅ³ÄÄ±ÄÁ³ÆÃ°ÃÁ°ÃÃ°ÄÁ¶ÃÂ²ÆÀ¯ÀÆ²ÃÄ°ÆÃ°ÆÂ°ÁÃ±ÃÁµÄÃ´ÆÅ³ÇÃµÃÃ²ÃÆ²ÆÃ±ÆÃ²ÄÀ³ÃÃ±ÆÁ³ÃÂ²ÄÆ°ÅÀ°ÁÂ±ÄÁ´ÇÁ³Ã¿°ÃÀ±ÃÁ°ÁÁ°Æ¾®ÃÀ°ÁÃ³ÁÁ¬ÃÁ®Â¾°ÁÂ±ÀÁ²ÃÁ°Á¾®ÀÁ®ÁÁ¯À¾®Á½°Á½¬¾Á°À¾­Â½­¾¾­Â¾°¾¾«Á¾­ÂÀ­¾½¬¾¼­Á»®¿½­Á¾¬¼¾­¾½«¾»¯¾º¦¿½«¾¹¬¾¼¬¿½¬¼¸«Á»­À¼¬½»«¾¾¬½¼«¾»¬¾»¬¼»ª¼º§¸»­½½«½¸©¾ºª¾»«¾º§»¸ª»¸©½»«¾¹©½¸¨¾·©»»«»º¬¾¸©»·¨¼»©½»¨¾µ¥º¹¦¿»¥½µ§¸¸ª½»©¾»¥¹º©¸µ§»¶§¸¶¥½º¨½·§¹³¦·¶§½µ¤¹µ¨»¶¨º¹¦»·ªº¸¦¸º¨»¸§¸·ª·µ¤¸·§¹º¨¸·§¸³¨¶³§·µ¤»¸§·µ¨»³©·¸¨»³©·º«»µ©·´¥»·¤¹µ¥»·§¶·§¶µ¦··¦·²¥º´¦·±¨¸¶§µ³§¸´¥·³¥·´¢·±£·´¡¶¶¤·²¢·°¢µ´£·´ µ²¢´±¥µ³ ´³¡´°¢´°´­¡³³£³²¢µ± ³¯¤´²¡³°¡µ°¤¶±¡´­¥³²¡µ±¡³±¢³± ¯®¡²°¡´®£±²¡³­²¬´­ ´®³¬³¯³­¡°¯°­±« ³°²­£´¯¤·³¥¹¶¥¹´¦¸¶«»´§»¶§»²¥»¶¦··¥»°¥¹³£¼¶¥»±§º»¥»µ¥¿µ§¼µ¨»³¤»´¦½·¨¾¹¥¼¹¨¿µ¬»¹ªÀ´¤»º©¾¸¬¹¶«»·©»¶¥¾µ©»¹«¼¸§¼·¨½¹¨½·¨½º©½¹ª¾·©¿·«¾¸¨Á¹ª¿·©¿µ§½¸¬½¹©¾¹©¼¸«¿¹©½¹ªÁ¸ª¿»¬Áº¬Á¼ªÀ»«¿»¬¾»¬Áº¬½»¬À¹ª¾»¬Áº¨À»¬Á½­¿º­Ã»¬Á¼¨À»§Áº­¿º­Á¼¨Á»®¿¼­ÃÀ«Á¼¬Ã¾ªÀÀ¯Ã¾©Á»¯Á¿¬Â¼®À¾°Ã¿¬Ä¾³Ã¾®À¼¬Â¼¬Ä¾­Á¾°Ã»®Â¼°ÁÀ²Å¼¬Â¹®ÂÀ°À¿®Ã¿¯Á»°Ã¾®ÅÀ°ÆÀ°ÁÁ¯Ä½°Å¿®ÂÁ±Ã½¬Â½±Á¿¯Æ¾­Ã¿®Æ¿®ÃÂ±Å½³Å¿¯ÅÂ±ÆÃµÄÁ±ÆÃ¯ÇÁ³ÃÃ³ÆÁ°ÇÁ°Æ¿²ÈÃ²É¿µÇ¾¯ÇÃ²ÄÁ®ÇÁ°ÅÂ±ÊÁ°ÅÁµÊÃ³ÆÁ³ÈÁ³ÆÃ³ÈÂ³Ê¿³ÆÃ¯ÊÂ³ÈÄ³ÅÃ³ÊÁµÆÃ²É»µÈÄ°ÉÂ®ÇÂ³ÄÀµÇÀ°ÇÁ°ÆÃ°ÆÁ³ÈÃµÆÂ±ÇÀ²ÈÁ³ÈÂ¯ÈÁ³ÆÀ±ËÅ³ÇÁ´ÆÃ´ÈÂ²ÉÄ´ÈÃ¶ÆÃ¶ÌÈ¶ËÃ³ÊÆ±ÊÃ³ÉÂ¶ÊÄ´ÊÇ¹ÊÆ·ÊÃ¶ÉÆ¶ËÂ´ÈÈ¶ÊÈµËÈ·ÊÅµÊÄ²ÈÅµÊÅ³ÌÅ³ÈÂ®ÅÇ¶ËÃ¶ÊÅ´ÊÅ¶ÊÅ¶ÍÇ·ÌÁ¶ÊÆ·ÊÈ³ÊÇ¸ÊÆ¶ÍÅ¶ÈÅ·ÊÆ³ÈÆµÊÄ·ÈÄ·ÉÁµÊÈµÉÆ·ÉÆ´ÌÆ³ÌÂ¶ÈÆ¶ÌÆ´ËÅ´ËÆ·ËÈ³ÌÇºËÇºÊÇ´ÎÉ´ÊÆ¸ÌÊ·ÍÈ·ÌÆ¶ÌÆ¶ÌÈ¹ÌÃ¸ÊÇ¶ÌÊ¹ÌÈ¸ÌÅ¶ÎÆ·ÍÆ¶ÌÊ¸ÌÅ·ÊÈ¶ËÈ¹ÊÇ´ÌÇ³ÌÊ¸ÍÈ·ÌÇ¹ÌÃµÊÊ¹ÍÇ¹ÌÇ»ÌÊµËÈµÊË·ÌÌ·ÎÈ¹ÎÊ»ÌÉ»ÍË¹ÎÈ»ÎÊ¹ÊÈ·ÌÊ»ÍÆºÌÊ¹ËÉ»ÌË·ÌÈ¶ÊÈºËÊ¼ÎÌ¸ÌÈ·ÐÊ¼ÎÈºÌÈºÌÊ½ÍË·ÑÉµÍÈ·ÈÇ¸ÌÈºÌÊ»ÊÅ»ÎÆ·ÊÈ·ÌÈ¶ÌË·ÌÆ¹ËÉ·ÊÉµËÆ»ËÉ´ÌÊ´ÊÈ¹ÉÆ¹ÌÉ¸ËÇ»ÌÊ·ÎÈµÎÈµÊÉºÌÌºÎÇ·ËÇ»ÏÉºËÊ»ÎÈ¼ÏÊ»ÎÌ¸ÌÇ»ÍÊ»ÎÊ·ÌÊºÈÊºÌÌ¼ÐÌ¹ÊÊ»ÍÈ»ÏÊ¼ÏË·ÎÈ¸ÎÌ¼ËÊ¹ÍÈºËÊ·ÍÊºËÌ¸ÎÉ¹ÊÆ¸ËË·ÍÇ¹ÍÉ¹ÊÉ¶ÌÆºËÈ¼ÌÉµÌÈ·ÊÊ»ÌÌ»ÎÉºÌÊ·ËÉ¹ÊÉºÌÈ¸ÊÊ·ËÇ·ÎÊºÌÅµÎÈ¹ËÊ·ÊÌ¸ÌÈ¹ÌÉ·ÌÈµÍËºÌÊ¹ÍÆ¶ËÈ·ÎÈ·ÊÉ¸ÊÆ·ÊÆ¶ÌÆ·ÊÉ¶ÌÉ¹ÌÉ¹ÍÆ»ÊÌ¸ÎÈ»ÍÉ·ÎÈ»ÌÊ»ÌÊ¹ÌÌ¼ÌÇ¸ËÌ·ÊÉ¶ËË¹ËÆ¶ÎÉ·ÌÈ»ÎÈ¹ÌÉ¶ÌË¸ÌÌ·ËÈ¸ÊÆ¹ÌÉ·ÌË¹ÊÈ´ÌÈ·ÊÉ·ÍÈºÊÆ·ÊÊºÌÈºÌÇºÊÈ¾ÍÈ·ÌÊ¶ËÇ¼ÎÊºÌÈ»ÊÊºÌÆ»ËÈ»ÌÌ»ÌÉ·ÍÊ·ËÇ¹ÌÊ¸ÍÆ¶ÌÊ·ÌÉ·ÊÈ¹ÎÈ·ÉÉ¹ÍÊ»ÌÉ¹ÌÈ»ÌÈ´ÊÊ¶ÎÊ»ÌÇ¹ÈÇ¸ÊÈ¶ÌÊ¸ÌÊ·ËÈ¹ÈÇ¸ÍÇ·ÈÆ·ÉÉ¹ÌÆ¹ÌÆ¹ÊÈ»ÎÈ¶ÇÈ¸ÊË»ÌÅ¶ÊÃ¹ÈÆ»ÌÇ¹ÌÇºÈÅ·ÊÇ·ÌÆ¹ÉÇ·ÊÅ·ÊÅ·ÊÇºÊÆºÈÅ·ÆÇ¸ÈÄ·ÊÄ¶ÆÆ·ÈÇ·ÊÅµÆÆ¶ÈÆ¹ÊÉ³ÊÆ¶ÈÊ¶ÊÄ·ÇÆ¸ËÆ·ÈÇ»ÇÆ¸ËÈ·ËÈ·ÍÆ¶ÈÃ·ÊÇµÊÇ·ÊÄµÊÄ´ÇÅ¹ÈÃ¹ÆÅ²ÈÅ¸ÆÆ´ÄÁ´ÉÀµÆÅµÆÆ·ÈÄ·ÆÃ³ÇÆ¶ÇÂ³ÇÃµÃÄ²ÆÂ³ÈÃ¶ÈÃ²ÇÀ³ÇÀ´ÃÁ´ÇÄ±ÆÀ³ÀÁ´ÈÁ±ÁÁ³Â¿³ÆÁ±ÅÃ²ÃÃ³ÃÅ´ÅÀ±ÅÂ±ÇÁ°Æ¼¯Ä¿°ÃÂ³ÅÀ¯Ã¾­Â¼°Å¾¯Â¿¯ÃÀ±ÁÁ°Ä¿°Ä¿³ÆÀ¯Ã¾¯Á¿²ÃÁ°Å¼®Æ¾±Ã½­Ã¾°Á½­Â½­Â¾®Â½¬¿¾­Á½­Á»¯Á¿³Á¿­Á¸¬Ã¾­Ä¼¬¾¼°Â»®Á¼®¾»®¼»¬¿¾­Á½¯½»¬À»©Á»ªÀ»¯¿¾¬Ã»¬Á¹¯Á·«À»«¿·¬¿¹¬À¶ª¾¹­»·­Âº¬¼º­¿»«½»¬¾º¬Á»¬¾»ª¾¼®¿º¬¿½¨¾¹¯¿»¯¼¹¨¾·«¼»¯Áºª¾»­¾¼®¾¼ª¼·®¼»«ºº¨Àº­¾¹¬»º¨½¹­º·¬¾·«¼µ©¹·­»¸¬º´«¾·¬»¸®¾·¥¿·­»·¬»·§¼¸©»´¬¹·©¾µ¬º´©»¸©½´§»´§»´¨»´¥¹³¤·¶ª¸³¦¸´¨¶·©»³¥¸³¦·²¦¸¶§·³ªº³ªº³¥·´¨¹µ¥»´¦¹±¢·°§¸±¦¹³¥¸³©·³¥¶³¦³²¥»°¢¶°¤·²¦¶²¤¸²¥¶³¤¶°«·­¢¶±£µ¯°²¡µ²¡´²¡µ´¢·³¢³µ¥º·¡·°£µ³¦·µ¢³³¡¸µ¢³²¦·µ´³¨»³¤·² ·´¤·²§¸¶£¹´¢µ´§´¸£¹³¡¸·¦´·§»´¦¸·¥·´£º·¥¸´©»¶¤·¶¦·´¥¹¶§»µ¤·µ¤¼·¥º·¢º¸§¸¸¨¹µ¤º´¨»·£ºº¤ºº¥º´©½º¡·¶£¼´§¹¸£¼·¨»¸§½¸¥¼µ¨¼¹«»¹£»»¨¼¹¬»»¨½º§»·©À»©¾º©º¹©»½©¿»¦»º¨¾¼¦½»§¿»¦»º©À»«Á¸¦º»¦Á¾ªÁ»©½½ªÁ¼§¿º¨¾¼«¾½§¾¾ª½»ª¼»ªÁ»«½»¬¾½«Â¾ªÀ»¬¾Á«Á½¬Á¾¬»¾¬Á¾©À¼¬À¾«½½©À»±ÁÁ®¿»¬Á½­¿»®Á¿«Á»ª¼¾«Á¾°ÁÀ­¿¾¬Á¾¬ÀÁ¯ÁÁ²ÃÁ®Á¾®ÃÀ¯Ä¾°Â¾ªÃ¾®ÂÁ®Ã¿¬ÂÀ­Á¾«ÄÀ«ÃÂ¯ÀÃ­Ã½¯ÃÁ°Å¾°ÃÁ®Æ¾²ÃÀ­ÂÂ³ÆÁ­ÄÂ¯ÆÃ­ÅÀ±ÄÁ°Ã¾¯Å¿¯ÃÃ®ÅÄ®ÃÀ®Â¾¯ÆÄ°ÄÁ±Å¾±ÅÃ®ÄÃ®Å½°ÁÅ®ÈÁ¬¿¾²ÂÁ®Ã¾¬ÈÂ±ÃÀ®ÂÃ°ÃÃ®ÂÂ³ÆÃ¯ÃÃ°ÄÃ­ÆÁ­ÆÄ²ÄÂ¯ÆÁ²ÇÁ°ÅÆ²ÆÇ°ÈÄ°ÆÅ²ÆÃ°ÇÄ³ÈÃ³ÈÃ³ÅÇ³ÅÂ¬ÅÄ²ÅÄ´ÆÄ³ÇÃ²ÅÅ²ÅÃ°ÇÄ±ÆÇ³ÆÃ°ÄÃ±ÆÅ³ÊÃ°ÇÄ³ÆÃ·ÉÄ°ÆÄ³ÇÄ³ÈÄ´ÈÃ³ÇÆ³ÈÃ°ÈÆ±ÅÄ·ÈÆ²ÈÄ¶ÇÈ´ÇÅ³ÆÃ°ÄÃ°ÊÈ²ÇÄ³ÇÆ²ÊÃ°ÆÇ¯ÆÃ³ÈÄ³ÆÅ´ÈÃ³ÈÇ²ÊÈ³ÈÇ´ÇÆ³ÉÃ²ÈÄ±ÆÈ³ÊÈ´ÌÆ³ÉÁµÇÅ´ÊÄ³ÈÅ¹ÈÈ´ÈÅ´ÆÇ·ÊÆ³ÈÆ´ÅÅ´ÇÈ·ÊÃ³ÈÃµÆÆ³ÌÇµÈÅ´ÈÃ³ÈÇµÅÈ¶ÊÆ´ÊÆ³ËÊ·ÇÇ³ÈÇ·ÈÈ³ÆÉ·ÊÊ³ÉÉµÇÆ·ÈÊµÊÉ³ÎÇ·ÈÊ²ÇÇµÊÈ¸ÌÇµÊÇµÈÆ·ÆÈ´ÉÈ´ÌÊ´ÉÈ³ÌÊµËÈ¶ÊÉ·ÊÈµÊÌ·ÌÈ³ÈÅ³ÇÆµÇÈ·ÈÈµÇÆ³ÆÇµÈÈ´ÉÆ²ÉÈµÉÅ³ÈÇ´ÈÇ³ÈÈ³ÊÇµÉÈµÇÇ´ÊÉ´ÈÇµËÉ³ÈÆ¸ÈÇ¹ÈÆ³ËÇ³ÆÇ·ÈÈµÌÅ³ÇÆ´ÊÊ³ÊÊ¸ÊÆµËÉ¸ÊÌ¶ÊÉµÈÊ¶ÉÈ·ÉÈ³ÇÇ¹ÈÆ¶ÊÊ¶ÆÈµÈÊ·ÊË¶ÇÈ¹ÉË·ÌÈµÈÈµËË·ËÉ³ÇÇ´ÈË·ÊÊ¹ÌÈ·ÊÈ·ÊÌ¸ÊÇ¶ÉÈ·ÈÆ°ÈÆ³ÈÉµÊÉ³ÊÆµÈÆµÈÉ³ÌÇ¸ÊÄ´ÈÇµÊÆ´ÇÅ³ÈÈµÈÉ³ÈÄ·ÇÊ·ÊÈµÇÇ¹ÈÈ³ÈÉ·ÈÆ¶ÉÆ·ÈÆ¶ÈÈ³ÈÇ¶ÃÈ´ÈÆ³ÊÆ³ÇÆ³ÈÄ¶ÆÊµÈÈµÊÊ¶ÉÄµÈÈµÈÆ·ÊÉ·ÊÉ¸ÈÌ¸ÊÇµÆÊ¶ÉÊ¹ËÊ·ÊÊ·ËÊµÆÇµÆÈ»ÊÊ´ÇÊ·ÇÊ¶ÈË·ÉÈ¶ÇÆµÇÈ´ÈÉµÅÇ³ÇÈ³ÌÇµÆÊµÇÇ³ÊÊµÄÉµÉÆµÈÇ¶ÆÇºÈÄ·ÊÇ¶ÈÅ»ÈÈ¶ËÉ·ÊÊ³ÅÈ·ÊÉºÊÆ³ÈÇ¶ÊÇ¶ÊÈ³ÈÇ³ÈÉ¸ÊÉ³ÆÉ¸ÉÊ¹ÉÇµÊÆ³ÃÈ³ÇÇ¶ÇÊµÈÈ¹ÉÆ²ÊÉ·ÊÊ´ÉÈ·ÈÆ³ÆÆµÉÈ·ÈÉ·ÉÊ´ÆÅ·ÆÉµÆÄ´ÈÆ¶ËÄ¶ÄÆ·ÈÆ³ÈÅ´ÄÆ³ÇÈ¶ÇÆµÈÆ¶ÆÆ³ÇÈ³ÆÄ·ÇÄ³ÈÆ±ÄÄ´ÆÇ¶ÆÂ´ÆÃµÄÄ³ÆÃµÆÆ³ÆÆ²ÈÆ·ÇÄ²ÂÃ³ÆÄ±ÄÅ³ÆÇ¶ÇÆ²ÇÅ´ÇÆ·ÆÆ´ÈÇ°ÈÄµÅÇµÆÄµÆÅ·ÇÈ³ÆÆ²ÉÅµÅÉµÆÄ±ÃÃ²ÅÅ³ÆÄ²ÅÃ³ÅÃ²ÄÂ³ÃÃ¯ÅÅµÃÃ²ÅÄ³ÃÃ±Ä¿°ÅÅ²ÄÃ²ÆÃ±ÃÃ²ÅÃ°ÇÄ³ÂÁ°ÄÁ´ÃÃ³ÅÂ®ÆÁ³Á¾³ÁÁ²ÁÀ°ÁÁ±Â¿¬À¾®ÄÁµÁÁ®Á½°¿Á³ÁÁ­À¾­¾Á®Á¿®Á¾®¾¾®¾¿¬Á¾­Á¾®À¾­Â½«¾¾°½¾°Á½¬Ã»¯¾½¬¾¾©À¿«Áº¬¾¾­À»®Á¿¬ÁÁª¿¼­¾»­À¾­Àº«¾½§À»«»¹¬»»­½¾«À¼ª»¼®Â¼ª¾½¬¿¸¬Àºª¼¹¦¼»©½¹©¾·§¼µ¦»¾§»º©¾¹§¼·ª»»¦¼¸¤·¸ª»¹§º·©»¸«¼¸§»¶ª»»«½º¨»´ª½¸¨º¹­»·¨»»¦»·ª½»ª¾·¨¼¸«¹·§¸¶¥··§¹·¦¸º§º»«»¸§»·¨º¸ª»¸¦º¸©¹¹©¸·¤º·§¼¸¦¼¹¥·µ§··©¸·ª··£·¸¥¹µ§º¸©º¸§»·§¹¶¦·³ª·¸¡·µ¥¸µ¥¹³§·µ¢¶²¡µµ¤·¶¥´³¥¶±¥µµ§·³¤³²£¶µ¢·³¢²²£´µ¥µ±µ´¤¶²¤³µ¥´³£·´¢·±¤¶²£³²¢·²£·°¡²² ²²¡²±¥·¬¡°±£³¯¡³°£²®£³°²°¡³¯£³¬¤¯°¥³¯¡¯±³®¤´·¨¼·¥»·¨¾µ«»µ¨»·©»³¬¾·ª¹·©»´©¾³©»¶¬½¹«¾¶ª½³ª»·©¿¶¬»¸«¿·§¿¸§¾¶­»´­¼µª¿´¬¿¹ª¿¹¬¾¹®¿¶ª¾·¬¿¸¬½¶©¿¼«¼·¬¼¹©¿¶¬¿¸¬À»¬Áº°¿º«½¶«¿º­¾¶¬¿¹«À¹©¾¼¬¾º«À·ª¿º­¿º¬Á¼¬Àº©Á¹¬À¼®Ã½¬¾º®¿¼®Â¿®Æ¾­Á»­Â¿­Äº®»½³Å¾®Á½®À½¬Ä¾®Ä¿­Ä»¬Á½¯Â¾­Â½¯Æ½­Å¿­Æ½±Ã¿«Å»²Æ¼¯ÁÀ²Å¾¯Ã¾­Æ¾¶Ã¾¯Á¿±Å¿¯Å¿®Ç¼¯ÃÀ³Ã¿¯ÅÂ°Æ¿®ÃÂ¯ÆÁ®ÆÀ±Ä¾²Å¿¬Â¾²ÁÀ²ÃÃ¯ÈÂ³ÆÀ²ÅÁ­ÆÀµÃÁ³ÇÃ±ÃÀ¯ÄÁµÇÁ³ÅÁ³ÅÂ±ÇÃ°ÆÃ³ÄÁ´ÆÃ²ÇÂµÇÁ³ÃÄµÆÄ±ÆÁ³ÆÄ³ÉÂ°ÇÁ³ÈÁ°ÈÃ´ÇÃ³ÈÁ¶ÉÄ¶ÉÅ³ÇÁ³ÆÄ²ÊÅ·ÇÃ²ÈÂ³ÇÃ³ÇÅ´ÊÄµÉÃ³ÈÃ¶ÆÃ´ÌÄ³ÈÃ·ÆÃ´ÊÅ³ÈÂµÇÃ³ÆÅµÈÃ³ÈÄ¶ÈÃ±ÇÃ´ÇÆ³ÈÁ°ÇÃµÆÆ¶ÊÃ¶ÌÄ³ÈÆ·ÈÅ¶ÌÆµÉÃ·ÉÆ¹ÊÇ¹ÊÄµËÅ³ÊÂµÈÅ·ÉÅ³ÎÉ¶ÊÆ¶ÌÆµÌÊ·ÊÆ¸ÇÆ¶ÌÇ´ÌÆºËÇ·ÌÆ·ÌÇ¹ÉÈ¹ËÈ¶ÇÆ¸ÌÈ¶ÊÊ¹ÌÅµÊÆ¹ÐÉ·ÎÆ·ÊÆ·ÊÈ·ÌÆ¹ÍÇºÍÅºÊÈ¶ÌÉ»ÎÈ·ÊÈ¹ÐÇ¸ÍÈ¼ÌÇ³ÌÅµÊÆ´ÌÉ·ËÆ¸ÊÈ¶ÏÈ³ÎÉµÉÈ»ÍÊ³ÊÁ·ÎÍ¹ÎÈ¶ËÈ¸ÌÈ·ËÉ·ÎÈ¹ÍÈºÍÊ¼ÐÊºÎÊ»ÍÊ¹ÎÇ¶ÈË¶ÍÈ·ÎÊºÐÉ·ÍÈ·ÌÈºÍÇ·ÌÈ¸ÐÈ»ËÊ»ÍÈ¹ÌËºÌÈ»ÌÊºÎÉ»ÐÈ·ÎÉ»ÎÍºÐÊ¹ÍÊ¹ÌË·ÐË¸ÈÆ»ÍÌ¹ËË»ÐÊ¼ÍÊ»ÊÈ¼ÎËºÌÍ»ÒË¸ÎÊ½ÎË»ÐË¸ÎÉ¹ÐÉºÎÌ»ÎË¹ÎÌºÏÌ»ÐÊ»ÎÊ»ÐÊ»ÑÊ»ÑÈ»ÐÌ½ÏÎºÌÌ¾ÎÌ»ÎË½ÐÌ¼ÐÈ·ÐÈºÊÉºÐÊ»ÌÈ·ÍÆ»ÊÌ»ËËµÍÊ»ÍÊ»ÌÎ½ÐÊ¸ÌÈ½ÎÊ»ÌË»ÍÊ¹ÌÈ·ÎË¸ÎÌ¼ÐÍºÍÌ»ÌÊ½ÐÌ½ÒÊ¸ÎÈ¿ÎËºÍÊ¼ÑÌºÍÊ»ÌÊ¾ÐËºÌÊ¼ÌÌºÎÎ¼ÎÌ¼ÐÌ¼ÒË¼ÏË»ÎÎ»ÑÊ»ÌÍ¾ÎÉ¼ÐÍ¼ÌÌ½ÑÌºÐÊ¹ÎÍ¼ÒÌ¼ÐÊ»ÌÌ¾ÎÈ¾ÎÈ»ÎÌ»ÏÌ¿ÌÍ¸ÌÉ¹ËÊ»ÎÌ·ÎÊ»ËÊ»ÐÈ·ÌÈ»ÍË¼ÎÌºÍÊ¾ÎÊ»ËÌ¹ÍÈºÎÊ¶ÍÊ¼ÌÊ¹ÒÈ½ÎÊ¾ÌÉ¹ÍË»ÎÈ¹ÐË¸ÍË¼ÌÊ¼ÐÇ·ÐÊ»ÌÈ»ÏÍ¹ÌÊ·ÎÆ¼ÌË»ÎÊ¹ÊË¾ÌÌºÏÊ¾ÎÌºÎÉ»ÌÇºÍË½ÏÌ»ÐÊ¿ÎÈ¾ÎÌ½ÎÌ¾ÐÉ¹ÎÌ»ÎÊ»ÐÌ¿ÌÊ¼ÐË¹ÌÈ»ÎÍ½ÏËºÐÈºÎÊºÐË»ÌÈ»ÌË»ÎÉ¸ÍÈ¸ÏÈ½ÌË»ÏÌ½ÏÊºÌÊ»ÍÈ¼ËÊ»ÍÊ»ÌÊ¹ÌÍ¾ËÊ¼ÌË½ÐÊ»ÏÊºËÉ½ÐÊ»ÌÉ¾ÏÊ¿ÏÉºÊÌ¾ÍÌ¿ÐË»ÏÌ»ÐËºÍËºÏÌ»ÌÍ¼ÒÊ¾ÎÉ»ÌË»ÐÊºÎÌÀÎÉ¼ÊÈ¼ÎÊºÍË¾ÐÊ»ÌÊ¸ÊÊ¼ÎÆºËÈ·ÉÈ»ËË·ÊÊ»ÎË¾ÎÇ¹ÌÈ»ÌÌºÌÉ¸ËÈ·ÈÈºÊÈ»ÌÉ¹ÈÆ»ÊÈ¹ËÊ¹ÎÈ½ÊÈ·ÊÊ»ÊÆºÊÌ·ËÈ¹ÊÆ·ÎÊ»ÇÊ»ÍÈ¸ÇÆºËÊ·ËÇºËÇ»ÊË»ÍÊºÌÊ»ÊÆµÊÌ·ÊÈ»ÍË·ÉÊ¼ÊÈ»ÌÊ¾ÎÅ»ÌÇ»ÊÈ¹ËÅ·ÊÆ¸ÉÇºÈÅ¶ÉÆ¹ÊÆºÈÄ¶ÊÅºÈÈºÊÃ³ÊÅ·ÈÆ¸ÇÃ·ÈÂ·ÇÄ¶ÊÅ¸ÉÆ·ÈÇ¶ÈÅµÈÆ¸ÉÇ¸ÇÆ¶ÊÃ·ÌÈºÈÆ·ÇÃ·ÈÂ¸ÇÂ¶ÈÆ³ÅÄ³ÆÅ³ÆÆ±ÆÃ·ÉÁ·ÄÃ³ÆÆ³ÈÁ¹ÆÁ³ÆÁ´ÅÂ´ÆÂ²ÇÂ´ÄÀµÄÃ³ÅÁ³ÄÁ±ÅÁ³Ç¾³Ä¿´ÆÁ²ÆÂ°ÃÁ³Ã½³ÆÁ¯Å¾¯ÄÂ´ÃÂ³Â¿µÃÀ°ÃÀ¯Æ½µÆ¾²ÃÁ³Å¾±Ã¾°Å¾³ÄÀ°ÃÁ³Ä¾³Ä¾®Á»³Ãº³Â¾®Á¼®Ä½µÅ¾¬À»­Á»¬Â»­Áº­¾½«Â½®Á»©¿»¯Ã»°Â¹°¿½¬Á¼¯Â»®¾»ªÁ¾¬¾»¬À»³Á¼®Á»¬Â»¬Á»­À¸¯Á»®½»¬Á¼²À»­À»ªÁ¼°½»±¾»ª¾¹­¿¹¯À¼¯À½¬Á»±Â¼®Â»«À»°À´±¼»­¾·«½µ°¼¸¯¿·ªÁ»¬À·¬¿¹¬Áº°À»®Á·®¼¸ª¾º¬¼¶¬¼·ª¼µ¬¼·ª¾¸«¿·¬»¸«»µ­»¶¦½·¬»µ¬º·¬¼¸¨»³«ºµ©º³¬»µ¨º¶¬¼·©¸¹ª¾³ª»·§¾·©¼³§»´¥»µª·³¥·±¥·´«¹´©·³¨·³¥¶¯¨¸³¤¼µ¦¶²ª·³©¸³¥º²©µ±ª·³¥º´§·¬¡¯´¤·¯£µ³¤·¶£¶µ¸³§¶¶¡¶¶¡·³¢´³¥¸³¢·³¦¶³¦·µ¤º³¥·¸§»¶¤¸µ¥³·£»µ§¸´¦¸¶¥··¦»·¥¸²«º¸£»·¨ºµª·»§¸·©»·©º·¤»µ¢»·¨¹·¤»»¥¸¸§¸·©»¼§½¸¥º¹¦»º©»·£½»¬½º©»¸£¾»©½º¨¼º¤»·©»»«¾½ªºµ«»¸¨»º«»º¬»¶ª¾¹§»·ª»¹§¾º©»»¨¾¼­¾»¨½¹«¾»§À»¬¾»©¾¼©À¾ªÃ»¬¾¾®Á¾«ÀÀ«Á¾­Á¼¬À½©¿¼¬ÁÁ«Â»ªÀ»«¾Á¨ÀÁ«¾¾­Á¾¨Ã½®Á½­ÁÀ©À¾¯Ã¼«ÂÀ­À¾«Á½®À½¬¾Á§Ã¾¬¾½¬ÁÀ¯ÁÀ¬À½²Á¿¯À¿®Á¿®¿Á®Á¾®Ã¾¬Ã¿®ÄÀ®ÄÁ®À¿®ÁÁ®ÃÀ­ÃÁ²ÄÁ¬ÅÁ±Á¿­ÅÁ­ÆÃ®Ä¿±ÄÁ°ÆÂ²ÂÂ®ÃÃ²Ã¿±Ã¾®ÆÂ°ÆÁ¯Ä½°ÃÀ¯ÄÃ­ÅÃ³ÈÃ°ÆÁ°ÆÄ³ÈÅ®ÅÂ¯ÄÃ«ÃÃ¯ÃÁ­ÆÃ°ÆÃ®ÃÃ¯ÃÂ®Å¾±ÄÂ®ÈÁ²ÆÄ°ÇÂ³ÅÃ±Ä½¯ÇÁ²ÄÅ²ÄÁ°ÄÃ³ÆÃ±ÆÆ·ÆÃ°ÄÃ³ÇÃ°ÃÁ¶ÇÄ´ÆÃ³ÇÆ³ËÅ°ÈÄ³ÈÃ±ÇÇ´ÊÇ³ÇÆ´ÈÅ¶ÈÆ±ÈÅµÈÄ¯ÇÆ²ÈÅ´ÊÇ¶ÊÆ²ÈÄ³ÆÈµÇÆ³ÇÃ³ÂÃ®ÊÄ²ÊÄ³ÈÆµÇÇ³ËÃ±ÆÊ²ÇÆ´ÈÆµÈÇ¶ÇÅ°ÉÄ³ÊÃ¶ÉÆ²ÈÈµÈÇ³ÈÆ³ÌÆ³ÈÆ²ÇÄ³ÊÇ±ÈÈ²ÇÆµÌÇ´ÌÅ³ÇÆµÊÈ³ÈÄ´ÊÆ´ÊÊ´ÉÆ²ÈÇ¸ËÇ³ËÆ·ÆÊ¸ÌÇµÊÆ´ÈÊ·ÎÊ²ÈÈ³ÊÈ¶ÉÉ¶ÌÆ³ÊÇ´ÊÈ´ÌÈ´ÌÉµÉÄ³ÇÈ°ÅÊµÌÈ¶ÉÈ¸ÌÊ´ÈÊ¹ÈÊ·ÌÄ·ÌÊ¸ÈÉµÉÈ·ÊÊ·ÊÊ¶ËÇ¶ÈÉ¸ÊÈ´ÊÈ¸ÉÆ·ÇÈ·ÊÈ²ÈÈ¶ÊÌºËÊ¸ËÆ·ÊÈ¶ÉÉ·ËÊ·ÊÈ·ÊÈ¶ÊÉºÊÊµÉÊ·ÈÈ¸ÈË·ÊÌ·ÎË¸ËË»ÌÏºÎËºÎÌ·ÌÌ¶ÇË·ÌÉ¹ÊÊ·ÊÈ¸ÊÊ´ÊË¶ÏÈ´ËÅ·ÈÊ¸ÊÈ¶ÉÈ·ÌÉ¶ÊÇ´ÊÈºÈÆ·ÌÈ·ÌÈ´ÇË·ÈÆµÌÆµÅÊ´ÌÊ¸ÌÊµÉÊ¹ÊÊ¶ËÉ´ÌÊ·ÊÈ¸ËÊ·ÌË·ÊÌ¸ÊÌºÊÌ¹ÍÌ·ËÍ·ËÌºÌÌ¼ÌÊµÊÆ·ËÊ·ËÊ¹ÈÌ·ÌÊµÊÊ¶ÉÊ¸ÌÊ¹ÍÊ¸ÊÊµËÌºÌË¸ÉÊ¹ÊÊºÌÌ´ËÌµÊÉ·ÈÊµÊÈµÈÆ·ÊÊ·ÈÉ³ÊÊ·ËÈ·ÊÌ¶ÌÈ·ÊË¸ÎÈµÊÊ´ÊÈ·ÊÈ·ËÉµÊÈ¸ËËµÌÈ·ÊÊ¸ÉÊ¸ÌÈ³ÈÈ¸ÌÊ´ÈÇµÊÉ·ÉË¶ÈÊ·ÊÇ¶ÇÈ¶ËÊµÉÈ·ÌÉµÈÇ³ÊË·ÉÇºÊÈ¶ËÇ¹ÊÊ·ÊÌ·ÌÈºÊË¹ÊÊ¹ÌÈ¸ÊÊ·ËË»ÊÎ·ÉÇ»ÊÉ·ËÊ¹ÇÈµÌÈ»ÐÈ¹ÌÉ·ÊÈ·ÌÉµÇÅ·ÉÈ·ÇÇ¶ËÆ¶ÆÊ¹ÊËµÊÈ·ÉË¸ÊÉ·ÌÉ·ÈÇ·ËÇ²ÌÆ¸ÈÊ·ÊÊ·ÈÊ³ËÉ³ÇÇ·ÊÊ´ÊÉ·ÊÊ¸ÈÆ·ÈÉ¸ÉÈ¸ËÈµÇÈºÊË¹ÌÉ·ËÉºÊÇ¸ÈÊ¶ÇÇ¸ÊÌ¸ÈÈ·ÊÊ¸ÇÈºÊË·ÊÈºÊÊ»ÊÊ¸ÍÉ·ÊÊºÊË´ÈÊ¹ÈÃ·ÆÊµÊÊ¶ÈÆ¸ÆÆ·ÇÆ·ÆÈ·ÆÊ¹ËÊµÈÇ¹ÇÉ·ÌÈ·ÇÆµÈÇ¹ÇÈµÈÆ·ÈÈµÈÇ¸ÊÆµÈÈ¸ÆÆ³ÆÅ²ÈÆ·ÊÄ³ÈÈµÈÈ¹ÆÅ³ÈÆ·ÈÄ¸ÇÇµÈÌ¶ÊÈ¸ÈÉ´ÈÄ±ÇÈ·ÈÊ´ÊÈ·ÊÆ¸ÇÊ¶ÉÈ·ÇÆ´ÊÆ¸ÈÉ´ÈÆµÄÆµÇÈ³ÃÇ¸ÈÇµÃÆ³ÇÃ³ÇÄ²ÆÄ´ÄÅ°ÆÁ³ÄÄ³ÇÄµÃÅ³ÂÅ³ÄÃ²ÃÅ³ÆÁ³ÅÃ±ÆÄµÆÅ´ÈÅ´ÆÃ³ÆÆ³ÇÂ²ÃÂ²ÂÃ¶ÅÇ³ÅÄ²ÄÃ¯ÃÃ³ÅÃ³ÅÁ³ÃÁ±ÄÃ²ÃÆ²ÄÄ³ÁÁ­Ã¿¬ÂÁ²Ã¾®ÃÁ­ÀÃ³ÃÂ®ÄÀ¯¿Á°Ä¾²ÃÁ°ÃÃ°ÃÀ¯ÁÃ°Á¿­ÀÀ®ÃÁ«Á½®Á¾°Á¿«½¹®ÀÀ²Á½¬Ä¾²¾¿©Á»¬ÃÁ°Á»¬Á¾ªÁ¼®¼¾«¾º«Á¼®½»«¾½¬¿»¬¾¹«Áº©¾»ª½»ªÁ»«¾¸©½¾ªÀ¾«»¸¨¾¹¨»º©¼¸¨¼·§¹»ª¿·©»»©»»ª»¸¥¾»ª»º«»ºª½º«»¸ª¿º§¾¸©»¸§»»«¼»¨»»«»»«»»ª½¸®»¹«¾¶©¼¸«ºº¨½»¨»¶¬ºº«½º¬½¸¨º»§½¹«»·©»¸ª·µ§º¸©¹¼¬»¶¨··¨º¸«½¸ª»·ª¸¸¬»»©¹·§¹·§¹·¦¸¸«¸·«»·¨¸µ¤¸¶¤·µ¦¸´©¶µ©µ´£¹²¤µ°£µ±¤¸´£º³¤µ¶§··¤²µ¥·³¤·µ£»²¥³´¦·³¢¸²¢³³£·³ ¶µ¥·²¥¶°£³²¡µ±¦µ¶£µ¯¢µ±¥·³£·³£µ²¤µ¯¥³±µ²£²² ³²¡´­¬µ·§½´¦¼¶ª¼º©¾¸§¿¸«¼·¬¾¸©½µ¬¹·¨¾¹§»·ª½»ªÂ¼¨À¹¬¾º«¿¹¬¾¶¬»ºªÁ»¬¿º¬¾·­»º«¾¸¬º»±¾¸­Ã¸¬Á¹®¾»¬¿»¬¿»¬À·­¿»¯¾º±¾º¬¿º«Á»¬¾º°Ä½¬Á»¬¾»¯Â¾¬Âº­Á¹®¼¼¬Á¹°Âº«¿¼«¾¹®¿»¯ÄÀ­¾»¬¿¹¬Ã¼®Á¾°Á½°Áº¬Æ»®È¾¯Â¼°ÅÀ²Á¾¶Ä¿­Å½¬Å½³ÅÀ³Ã¾¬Á¾¯Ä¿®ÃÁ®É¿¯ÇÁ¯ÅÀ±È¿µÆ¼²Ä¾³ÅÄ¯ÃÂ³ÁÂ³ÇÀ²ÇÀ³ÆÃ³ÆÁ±ÆÀ²Å¿°ÇÄ³Æ¿³ÈÁ³ÇÂµÈ¾¯ÅÂ²ÆÀ³ÅÁ°ÆÄ³ÆÁ±Æ¾´ÅÂ¶ÈÁµÆÁ³ÇÁ°ÆÃ³ËÃ³Æ¿¶ÅÁ³ÆÂµÈÀ¶È¿³ÈÂµÇÁ´ÆÄµÈÂ³ÇÄ²ÊÂ·ÈÅ´ÊÃµÆÆµÊÆ³ÊÃ´ÈÃµÈÃµÈÁµÇÃ¶ÊÃ³ÇÃµÈÅ´ÉÃ·ÉÁ³ÊÁµÈÄ·ËÆ´ÊÃ¶ÆÇ³ÊÂ¶ÊÆµÊÈ»ÌÆ·ÊÆ·ÊÄµÊÃ·ÉÇµÌÅ·ÌÆ·ÊÃ·ÌÃ·ÈÃµÈÅ¸ÈÇµÊÆ³ÇÅ¶ÊÆ·ÌÆµËÃ¹ÌÅ·ÊÅ¹ÌÆ¶ËÈ»ÊÆ¹ÎÇ¶ËÆ¹ÈÆ·ÍÅ·ÌÇºÌÇºÌÇ·ÌÈºÌÈ½ÏÉ¹ÍÉ¹ÍÇ¸ÍÅ¸ÏÇºÎÆ¸ËÊºÎÈ»ËÆ¹ÐÈ¹ÍÈ¸ÌÈ¹ÍÈ·ÌÇ»ÌÈ¶ÌÉ·ÐÊ´ÌÉ¶ÌÊºÌÇ¼ÍÆ·ÌÆ·ÌË¹ÍÆ¸ÌÉ»ÎÆ»ÌÈ»ÌÊ»ÎÊ»ÍÈºÏÈ»ÌÎ»ÑÈ¸ÎÈ·ÍÉ·ÎÈ¸ÏÇºÎÈºÍÇ»ÐÊ¸ÐÈ·ÒÈ¸ÎÊºÌÊ»ÎË¼ÍÊ·ÍÊ¼ÎË¼ÏÊ¾ÎÌºÏËµÍÌ¼ÎÊ¾ÒË·ÑÈ»ÐÎ»ÑÉºÎÈ»ÎË¼ÌÌ»ÎÌ»ÌÊ»ÎÉ»ÎÌ¾ÒÇºÎÌ¹ÒÍºÏÌ¾ÎÍ»ÎÊ½ÑÊ»ÎÎ¾ÎÐ»ÒÊ½ÍÍ¾ÓÌ¼ÐË¼ÎÍ»ÑÍ»ÒË»ÓÎ¼ÐË»ÐÌºÐÊ»ÐÌ¼ÑË»ÏÍ»ÒÎºÒÊ¼ÐÎ½ÐÌ¼ÓÍ»ÐÍ½ÐÌ½ÕÎ¾ÐÌ½ÑÌºÐÊ¼ÑÍ¾ÒÎ¾ÐÎÀÏÐ½ÒÎÁÒÑÀÒË»ÐÏÁÐÌ»ÐÊÀÐÈºÐÍ½ÐÌ¼ÑÍ¾ÐÍ»ÎÈ»ÒÌ»ÐÍºÐÌ¼ÐÌ¼ÎÌ½ÎÊºÐÊ»ÎÍ»ÑÍ»ÍÌ¹ÐÊºÒÎ¸ÐÌ»ÏÍ¼ÎË¾ÐÌÀÑÍ¿ÐÎ»ÓË¾ÐÑ¼ÐÎ»ÏÌ¾ÐÐ¿ÏÌ¿ÒÍ½ÎÍ½ÐÌ¼ÐË¿ÌÐ»ÍÍ¾ÒÌ¼ÒË¼ÐÌ¼ÐÎ¿ÒÌ½ÒÍÀÐÐ¾ÎÎ½ÐÍ¿ÐÌ½ÏÐ¿ÑÎÀÐÍ¾ÏË»ÐÌ¾ÌÎºÐÌ¼ÎÎ»ÎÌ»ÐË¾ÎÊ¾ÏÍ½ÐÌ»ÐÌÁÎÈ¼ÏÌ¼ÐÊ½ÍÎ»ÏÍ»ÐÊ»ÎÍ¾ÓÌ¼ÒÎ¾ÐÎ¿ÑÍ»ÒÊ¹ÐÊ¼ÎÌ»ÒË»ÌÌ»ÍÌ¹ÍÊ¼ÒË¾ÌÌ»ÒÎºÎÊ¾ÎÌ¼ÏË»ÏË»ÍÌ½ÐÎ»ÑÌ½ÐÌ¾ÐÌ¼ÒÍ¾ÏÏ¿ÐÍ¿ÐÌ¿ÐÍ¿ÒÐ¾ÒÍ½ÐÌ½ÏÑ¾ÎÌ¼ÍËÀÏÍ¿ÔÍ¼ÐÎ¾ÏÊ½ÐÉ·ÌÊºÎÊ»ÏÌ·ÐÈ¼ÐÎ»ÒÌ½ÌÊ¼ÐË¿ÑÍ»ÐË¸ÍÊ½ÐÎ½ÎÌ¾ÎÊ¾ÑË¾ÍÌ¾ÐÎ¼ÑÊ»ÐÍ¾ÎÌ¾ÌÎ¼ÐÍ¿ÎÌ½ÑÍ¿ÏÌ¼ÒÌ¾ÎÌ»ÎÏ¼ÎÍ½ÏÌ¾ÐÌ¹ÌÍ»ÌÊ»ÎÌ½ÐÌ¿ÎË¼ÎÐ¼ÑÊ¿ÎÒ¿ÌÍ»ÏÌ¾ÌÌ»ÐÊºÍÊ¼ÎÍ¼ÌË»ÎÊ¼ÐÍ¾ÌË¹ÎÌ¿ÐÇ¾ÌÍ»ÎÌ»ÎÌ½ÌËºÌÊ¾ÌÊ»ÍÍ¼ÐË¹ÌÈ»ÎÊºÌÈ¿ÊÆ¾ÐÌ½ÎÉ¹ÏÈ¼ÌÉ»ÍÇ½ÌÇ»ÎÉ¿ÍÊ½ÎÉ¹ÎÊ¹ÊË¹ÎÊ¾ÎÊ½ÎÌ»ÎÍ½ÌÌ¼ÍÍ»ÎÊºÍË¼ÎÊÁÐÈºËÇ»ÌÈÀÎÇ¹ÌÈ¸ÌÈ¼ÍÉ»ÍÉ¹ÌÆ·ËÌ¼ÍÊ»ÊÆ»ÊÈ»ÊÇ¸ÈÆ·ÌÈºÌÇ¹ÌÆ·ËÈ¹ÉÇ¶ÈÆ¹ËÈ¼ÊÆºÊÈ¹ÈÄºÈÊºÌÄµÊÈ¹ÉÆºÊÇ·ÈÊ¹ËÇ¸ÌÄ¶ÇÅ·ÆÅ¹ÊÄ¸ÉÅ¶ÆÄ¹ÈÅ¸ÇÃµÊÃ¸ÊÅ³ÌÇµÉÆ¶ÈÃ¶ÇÅ¶ÆÄ·ÊÅ´ÈÂµÈÅ·ÊÄ·ÈÂ³ÆÄ´ÈÁµÌÃµÈÂ³ÆÁ°ÆÃµÄÁ²ÃÁ·ÅÁ²ÄÃ³Å¿³Å¿¯Ç¿³ÄÁ³ÈÀ´ÆÀµÃÁ°ÆÃ±ÃÀ³Å¾¬Å¾°Æ¾°Å½®Ã¿´Ã½¯ÁÀ²Æ¾¯Ç¾®Á¾¯Â½°ÂÁ¯Å¾±Ä¿®Á¾­Ãº²Ã¾µÃ»°¾¼³Ã½±Â»³Ã¹®ÀÁ®Å»¬Ã»­Á»®Á¿­Â»°Á¼¯Á¾­Á½¯Á¿±Â»®Â½°¿»±Á¿±¿¼¯Á»°¾¿°Ã¼®¿»¯½¼¯¿½¯Â¾±¾»±¾º®¿¿°Á¾²Ã»­¾»±¾¼¯Áº¯¿»­À»±Á»±¾»®½¼±¾½®¿¼²Ãº®Á¹¬¿¸¯¾¹¬¿»®À¼±¾»¬¿º­Àº®¿·¬¾¹¬¾¹¯¼¸¬¼·®Á·©¸¶©»¶«¼·®»µ©»¶¬¼¹©»¶¬¾¶¬·¶©½¸«¼µ¬¾´ª¾·¬½¹¨»³¬¼·¬º·®º³§»µª¹µ­·¶©·µ§¹³¬¸·¨¸µ¬º²©ºµ«¶·§»´«¶¶ª½³¦·¯¤²µ¤¸¸¢¹·ªº·£»·¦¸³¥ºµ¥¸¶¤º´£»¸¦º·¦º¸¨º·¡·¶¦»·¥·¸¦¹´¤»µ¢º·¨»·¥º¸»·¨¾¶¦»¹¨¼µ§»·§¼¼¤»¸«¹¸§»¸¥¼·§½¹«»¸¥½º§»·§½¼§¾¼¨»¶¨½»¦¾»¤¾»¤¼»¨¼»¨¾»©¾¸£¼»¨½½«¾»©¾¹©¿·ª»½¨½¸©¾¼¬¾µª¼½§¾¸©¾¹ªÀ½§À»ª¾½¬À¿ª¾½§Á»¬¾½©À½©¾»¬¾À¬Ã»§À¼«Á¾¬Ã¾¬Ãº­ÁÁ¬Ã½¬Ã¾­Ã½®ÁÁ©ÃÀ­ÂÁ­ÃÁ®ÁÀ­Ä»¯Â¿¬Ã¼«ÃÀ®Â¾­ÃÀ­Á½®ÄÁ­Á¿«Á¿¬¿¿­Æ¿¯ÄÂ¬Á¿®Â¿¯À½®ÁÁ­ÆÀ®ÁÀ°ÁÂ®ÄÁ³ÃÁ®ÆÁ®ÃÀ¬ÃÁ°ÃÂ±ÃÃ¬ÃÃ³ÅÁ¬ÃÀ°ÆÃ®ÅÀ±ÄÁ°ÃÂ®ÄÃ¯ÅÅ³ÆÁ®ÆÄ³ÃÂ®ÆÃ®ÄÆ³ÇÁ±ÆÅ²ÆÁ®ÆÂ®ÃÅ²ÈÅ²ÆÁ²ÅÃ®ÆÆ°ÅÄ³ÆÃ´ÊÂ³ÃÃ²ÅÅ²ÆÆ°ÇÂ³ÆÂµÈÃ®ÆÆ²ÇÅ²ÈÃ²ÈÅ³ÃÀ¬ÈÁ®ÆÆ´ÆÅ³ÈÆ®ÉÃ²ÆÃ²ÆÃ®ÇÂ°ÆÅ´ÆÃ°ÊÈ¶ÅÄ²ÇÅ¬ÊÇ³ÈÇ´ÈÆ²ÈÆ³ÌÆ³ÃÈ·ÌÆ°ÈÃ·ÇÇ²ËÆ³ÉÆ³ÄÇ²ÊÈ°ÈÆ±ÈÅ´ÉÈ±ÈÈ´ÊÆµÊÇ´ÊÆ³ÊÇ·ÈÉ³ÊÇµÉÆ³ÈÇ´ÊË³ÈÅµÊÈ±ÊÄ´ÈÈ²ÌÈ´ÊÈµÉÊ´ÉÆµÌÈ¶ÊÅµÉÈ´ÊÈµÇÆ´ÇÈ³ÌÆ²ÊÇµÍÆ²ÇÈµÊÈ´ÊÊ·ÊÇ²ÌÈ²ÇÇµËÊ·ÉÇ³ÊÃ¸ËÉ´ÍÈ·ËË·ÉÍ·ËÈ·ÎÈ·ÈÌ°ÌÊ·ËÇ¸ÌÈµÊÊµÊÈ¶ÊÊ¶ÊËµÌÉ¸ÌËµÏÊ¸ÊÈ·ÊÈ·ÊÊ¹ËÊµËÉµÈÉ¶ÊÊ¶ÌÉ¸ÌÊ·ÍÊ·ËËºÌË¹ÌË·ËÌ·ÍÌºËÌ¶ÎÊºÎÇ·ÎÊµÆÉ¹ÎË¸ËÊµÎÈ·ÌÊ»ÌÊ·ÏË½ÍËºÎÌ¹ÐÌ¹ÍË»ÌË¹ÍÌ¸ÎÌ·ËÊºÎÉºÌÌ·ÎË·ÏÎ¸ÎÌ¶ÌË¸ËËºÎÈ»ÉË»ÏÎ¹ÌÌ»ÌÌ»ÎÊ·ÊÎ¸ÌÈ¸ÌË³ÍÊ¸ÊÎ¸ÍÊ¶ÍÊ¶ÎÉµÈÌ·ÌËºÐË¸ÊÍ·ÎÌ·ÓËºÎÊ¶ÎÈµÌÈ»ÍÌ¶ÏÊ¶ÈÍ·ÊÊ¸ÎÊ¸ÊËºÎÌ¹ËË¸ÐËºÌÇºÎË¸ÊÌ¸ËÌ»ÎÌºÍÉµÈÎ»ÎË¸ÌÎºÎËºÌÌ»ÎÊ¸ÌÌ»ÌÊºËÎ·ÏËºËÌ½ÌË¹ÍÌ¾ÌÌ»ÏÌ·ÌË¹ÎÎ»ÎÌ¸ÏË·ÊÊ¹ÌÌµÍÉ·ÌÊ¸ÍË·ÌÊ·ÊÉ»ÇÌ¸ÌÊ¶ËÊ¸ÎÌ·ËÆ·ÊÊ·ÌË·ÍÊ¶ÌÊ»ÈÌ¸ÌÈ¹ÎÉ¹ÌÊ»ÌË¶ÊÊ·ÊÉ·ÍÊ¸ÊÊ·ÊÊ·ÌË»ÍÌ´ÈÉ·ÌÌ¸ÌÈ³ÊÊ·ÊÎµÍÊ·ÌÊºÌÍ·ÒË·ÐÊ»ÌÌ¹ÍÍ»ÏÌ¸ÊÌ»ÎÌ·ÍÌ¹ÌÊ»ÌË»ÊË¹ÏÌ»ÌË·ÊÈºÌÊ¹ÌÌ·ÌÉ·ÈÈ·ÉÌ³ÊÊ´ÊÈ·ÈÊ¸ÌÊ·ËÊ´ÌË·ÌÈ¸ÊË¸ÌË¶ÍÌ¶ÈÍ¶ÏÇ¸ËÊºÊÉ»ÊÊ¸ÌÊ»ÎÊ¸ÌÊ·ÈÊ¶ÌË½ÍÍ¹ÌÊ·ÎÊ¸ÊË»ÐÊ¸ÊÉºÉÊ·ËÉ¸ÐÊ·ÊÊ·ÉÌ¹ÍÉ¶ËÊ»ÊÊ¸ËÌ¸ËÉ¹ÊÊ¸ÌÊ»ÊË»ÉÈ·ÌÌ²ÉÊ¶ÉÌ¸ÌÊ¸ÊÊ·ÇÊºËÌ·ÌÈ»ÊÊ¶ÌÊ¸ËÉ·ÊÉ»ÌÈ»ÌÉ¶ÈÉ¸ÊÊ·ÉÉ´ÊÆµÊÊ¶ÊÈ¸ÉÆ·ÈÈ´ËË¶ÌÊ¸ÈÌ¸ÊÉµÉÇ¸ÆÆ´ÉÊ¸ËÉ·ÉË·ÉÈ·ËÊ³ÈË¹ÈË·ÊÉ¹ÉÌ¸ÊÈ·ÈÊ»ËÈ·ÉÌ¸ÎÊ·ÈÆ¸ÌÌ¼ËÆ´ÊÈ·ÇÇ·ÇÊ·ÈÈ·ÈÈ´ÄÉ±ÊÇµÈÈ´ÆÇµÊÇ³ÇÈ¶ÉÆµÆÂµÇÈ·ÈÇ·ÈÆ´ÈÆ´ÇÉ·ÈÆ³ÊÅ´ÆÆ´ÊÆ´ÇÈ´ÆÆ·ÆÆ²ÇÂ´ÆÄ³ÄÄ´ÃÄµÇÃ²ÄÅ®ÄÄ±ÇÁ·ÆÃ³ÈÄ°ÇÃ´ÁÂ°ÆÆ´ÆÃ²ÆÄ²ÃÁ³ÄÃ²ÃÁ°ÄÂ²ÆÃ²ÅÆ±ÃÀ°ÆÃ²ÃÃ³ÃÆ´ÃÁ³ÄÁ°ÆÀ©Ä¾³ÃÃ®ÂÂ²Â¾¬ÁÁ®ÃÁ¬Â¾°Â¿¯Á¿­Ã¾³ÀÁ®ÃÁ¬¿»®Â¾¯Á¿«Á¿«¿¾®Á¿¯À¾ªÁ½¬¾¾­Á¿®¿¾«À¾«¿¾¬Á¼¯¾¿¬Â½®»»«¼¹«¿»«À¹¨¾¼¬Ã½¬¾¹­¾º«¼¼§¾»©¾»©¾¼¬¾»ª¾¸«¿¼«¾»­º»®½»«Áº¦¾»©»¿­À»¬¾¸«½¿«»»­¾º¬»»©½»©ººª¾»ªº»¯À¹¨¾½«»¼¬»»«Á»¬½½¬½»©½¹«¼ºª»»¬¾º¬¼»¬¾¸§»·¬»¼«º¹ª¾»«¹¸«¼·¬¼¸­»ºª¹¸­»¹¬»¸«¸¸ª»¶¦··¤»·¦¼¶¨º¶§·¶¨¹·«¸·§¹·©¸µ¤·µ§ºµ£¹µ¨·³¨·¶¤¸µ¤·³§¹µ§´´¤·³¥·µ§²·¦¸´£¶³©¹·¦¸´©¶´¦¸´¤·³¥¸±§µ°£¶³¥´³¥·µ¢·µ£¶²£µ²¡·±¨µ¹¬½¹¬Á·¬¾º¦¾¹¯Á¸¬Á·­¾º©¿·§¾¸¨¿¼ªÁ¸«¿¹­À»²À»ª¿¹­Á»¬À»¬Á¶­À·¬¾»¨¿»¬Á»«Á·­Á»¯À¹«Á¼«Ã·­À»®Á½©Á»¬¿½®Â¿ªÃ»­Âº¬Ã¾¬Ã¾¬Á¼³Ä¼®Ã¹­Á¹¯Á»²Ã»¯Ã½®Á¾¬Á¿±È»¯Ã»®Ã¼®Â¼­¿¼¬Ä»®Ä»°Ã¾­Ç¿¬Ä¿¬Å¾°Æ¿¯Æ¿°Æ¿²ÆÀ¯ÃÀ¯Ç¿¯Å¾°Ä¿²Ç¿¯Ä¿°Æ½°ÇÀ³ÅÀ³È¾±È¾³ÆÁ´ÇÃ²ÈÀµÊÁ´ÇÃ³ÉÂ²È¾³ÌÃ·ÉÂ´ÉÀ°ÆÃ¯ÈÀ®È¿´ÈÂ³ÉÂ²È¾²ÇÆµÈÂ³ÈÂ³ÇÃµÈÄ³ÇÁ³ÈÁ³Ç½³ÈÁ³ÇÁµÈÃµÉÁ²ÈÅ±ÉÃ³ÈÀ¶ÌÄ´ÊÅ¶ËÅ·ÊÁ´ÉÄ´ÌÃµÈÆ³ÉÅµÊÄ³ËÃ¶ÌÅ³ËÃ³ËÃ¶ÍÈ¶ÌÃ·ÊÅ·ËÅ¸ÌÅ¶ËÆ¹ÎÃ·ÊÆµÊÅ·ËÈ¸ËÆ´ÍÁ°ÊÆ·ÊÆ¶ÍÃµÌÄºÌÆµÎÇ¸ÊÈºÎÇ·ÎÅ¹ÎÇ·ÐÆ·ÊÃ³ÌÈ·ÍÊ¸ÌÅ·ÐÈ·ÌÆµÐÆ¸ÎÈ·ÌÆ¸ÏÈ¶ÌÇ¸ÌÈ¹ÌÂ¶ÌÇ¹ÌÈ¹ÊÊµÎÇ¸ÎÇ¸ÍÄ¶ÌÇ·ÊÇ»ÍÉµÎÇ»ÎÈ·ÍÈ¸ÎÈ·ÎÈºÌÇ¹ÒÆ·ÐÈ¼ÍÈ·ÎÈ¹ÐÇ¶ÍÊµÎÊ»ÎÈ¸ÎÆ·ÍÊ¸ÐË·ÌÈ»ÎË»ÐË·ÐÊºÏË¼ÒÈ¹ÏÈ·ÎÊ»ÎÉ»ÏË»ÐÉºÏÉ½ÏÈ¸ÐÊ¹ÒÌ¶ÎÊ»ÌÊ»ÏÊ¹ÏÍ»ÐÇ¹ÔÌ¸ÏÊ¼ÐË·ÒË¹ÐËºÐÇ»ÒÌ¹ÒÊ»ÐÆºÑÊ¾ÑÉ¼ÕÉ»ÐÍ»ÐÊ»ÐÊ¼ÒÍ»ÐÌºÕË¾ÏÊ»ÕÎ»ÐÉ¾ÎÎºÒÍ»ÒÊ»ÑË¼ÒÏ»ÏÍºÎÊ½ÓÌ¼ÓÊ»ÒÑ»ÔÑ»ÐË¹ÐÊºÒÐ»ÓÎ¾ÓËÀÒÎ¼ÐÐÀÓÏ¿ÓÌ¼ÐÌ¾ÔÐÁÐÎ¾ÖÍ¼ÓÌÁÓÐÀÓÎ¼ÓÌ»ÒÌ¼ÐÌ¾ÒÒ¼ÔÎÀÒÎ¾ÒÐÁÒÏÁÖÎÀÓÎ¾ÓÎÁÒÐºÕÐ»ÓÏÁÐÐ»ÕË¼ÓÌ¾ÐÌ»ÔÒ¿ÒÎÂÕË¼ÓÐ¿ÑÏ¾ÓÐÀÓÌ¾ÓÌ¾ÒÎÀÒÐ»ÓÎ¾ÓË½ÓÏ¾ÓÌ¿ÎÍ¿ÒÍ¹ÓÎ¾ÓÊ¾ÒÐ»ÓÌ¾ÔÍ¿ÕÍ¿ÒÌ¿ÕÎÀÓÐ½ÐÌ¾ÕÌ¿ÒÎ¾ÐÍ¾ÐÍ¾ÒÌ½ÐÍ»ÑÐ¿ÑÍÀÑÐ¼ÒË»ÒÌ¾ÒÍ»ÕÎ¾ÓÎ»ÒÎ½ÒÐ¾ÐÍ¾ÓÐÀÓÒÁÕÌÂÑÎ¿ÓÍ¾ÒÎ¿ÓÑÁÖÍ¼ÑÎ¾ÒÐÀÓÐÀÏÍÀÒÏÀÕÌ»ÒÍ¾ÐÒ¾ÕÐ¿ÒÎ¾ÓÏÁÕÎºÒÎ½ÒÎºÐÒ½ÕÌ¾ÓÎ»ÒÎ»ÑË½ÒÌ»ÐÎ»ÑÉ¹ÐÌ¾ÐÎ¼ÒÊºÏÎ¿ÐÍÀÕÌ¿ÐÌ»ÒÌºÑÌÀÒÈ¼ÏÍ¼ÐÉ»ÑÊ¿ÐÐ¾ÐÍ¿ÑÌ¼ÒË¾ÑÎ¼ÑÍ»ÒÑ¾ÒÏ¾ÔÑ¾ÐË¾ÎÎ¼ÒÏ¿ÖÎÁÐÔ¿ÒÌ¿ÕÎ¿ÒÐ¿ÑÈÁÓÐÀÐÏ½ÕÐ¾ÒÌ¿ÑÎ¾ÓÍÀÑÍ¿ÐÌ»ÒÌ¾ÒÎ½ÓË¾ÒÊ»ÎÍ»ÎË¾ÑÊ½ÐÍ»ÏÊ»ÑÊ½ÐÎ»ÎÊ¾ÒÎ½ÓÍ½ÏÌºÑÌ¿ÑÌ»ÏÊÃÓÍ»ÒË¾ÑÉ¿ÌÎ¼ÎÌ¹ÒÎ¿ÒÌ¼ÐÎ¾ÕÍ»ÒÎ¾ÏÍ½ÑÌ¾ÑÎÂÓÍ»ÑÌ¿ÒÏ½ÒÍÀÒÎ¼ÐÍ¾ÐÏÁÑÎ¾ÒÍ¾ÐÎ½ÒÌ¾ÓË¾ÐÎ½ÐÎ½ÒÍ½ÒË¾ÒÎ¼ÑÌ¾ÏÏ¿ÒÎ»ÍÈ½ÎÌ¼ÐÎ¾ÒÊ»ÓË½ÓÎ¾ÐÉ½ÐÊ¼ÑÎ½ÑÊ½ÎÊ¾ÐË¹ÐÌ»ÎÌ¾ÒË½ÒÌ¾ÐË»ÐË¾ÎÎ»ÐË»ÎË¿ÐÌ»ÐÌ½ÐÊÀÎÍºÐÌ½ÏÎ¾ÏÍ»ÒÐ½ÒÍ¾ÒË»ÑË¾ÐÌ¾ÒÏ¾ÐË¼ÏÊ¿ÒÍ»ÎÊ¼ÐÊ½ÐÊ¼ÏÈ»ÍÌ¾ÐÌ»ÎÊ½ÐÆ¼ÐÌ¼ÍÊºÎÊ¼ÐÉ½ÍÊ·ÍÉ»ÌÈ»ËË·ÍÉ¼ËÌ¹ÍÎ»ÌÆ¹ÊÈºÌÈºÐÊ·ÌÈ¸ÌÇ¹ÌÈ·ÎÇ»ËÈºÌÅºÌÈ»ÎÈ¹ÊÇ¶ÌÉ¶ÌÄ·ÌÈ¶ËÅ·ÉÆ¹ÊÆµÊÃ³ÉÁ¸ÊÆ·ËÇµÊÄ¶ÊÆ·ÊÅ¹ÊÇ·ÍÃµÌÄµÌÆ·ËÄ·ÌÆ·ÊÃ´ÊÆ¶ÊÃ¶ÈÁ°ÈÇ¶ÊÃ´ÈÃ³ÈÃ±Ì¾³ÇÂ·ÇÂ´ÇÂ¯ÈÁ´ÈÃ¶ÈÁ¶ÊÀ³ÆÀ´ÆÂ´ÈÁ³Æ¿³ÆÁ³È¿¯ÅÀµÅÀ³È¼²Æ¾³ÅÁ³ÆÁ³ÈÀµÆÁ´Ç¿¯Ç¾²Å»²Ã¿°Ã»±Å¿³Æ½®Ã¾³À¼²Á½¬Ä»­Ã¼°Æ¾°Ç½±À»­Ã»±Æ¾¯Æ¼¯Ä»­Å½¯À¾°Ä»°Â¾²Å¾±ÃÀ²Ã¾¯À½°Â¾°Ç¿­Â¼®Â½³È¿³Á¾®Ã¾®Ã¿¯Á¼³Å¼³ÂÀ³Ã¾¯Á¼±Â»¯Â»¯Á¼®À½¯Ã¼°Â½¯Á·²À¾¯Â¼³¾»®Ä»¬¿½¯Ã·°¿º®À·°À»¯Â½®À¹¬¾¹­Á¼«Á¹°¼»¬Áº¬¿¸¯À·¬À¶«¿·®½¹¬Á¹¬À¶¬¾·®À¸©¿¶¬¾¶¬½¶¬¾¹ª½º¬»¹¬¼³§¼·¬¼·ªÀ»§¾´¯¼º®¾¸«½¶ª¼³«»·ª¼³¬¼¶¬¼¹¨¼·©»·¥¾´§¾°£°·§¶·¤´»¦¼µ¤¸·¦»µ¦¹·¦¸¶£»º£»·¤»¸«¹¸¤¹¸§»¹©»¸¥º¹§»¶©º·¨¼¹¤¹¸¥»·¦º¶¥»¹¤¼·§¼·¥»¸¬¼»§½»¥¾·ª¼¸§¼½¥»º§¹¹©¾»¥½ºª½»¬½¸§»»¥½»©¾»«¿»«¼¹§¾½§À»«¾»§½½¬¾¹ª¾½ª¼»«À»¨¾»¨½»©Á»ª¼»©¿½ªÃ¾«¿¾ª¾»¬ÀÁ­ÃÀ­Á¾¬½¾¬Á»¬À»¬¿¿§À½£Á¾¬Á¿¬Ã»®Á¾²ÀÂ­ÁÁ©Á¾°Ä¿¬ÅÁ°ÃÁ¯ÄÁ¬ÇÁ¬ÁÃ³ÆÁ°ÆÁ©ÂÀ¯ÃÁ­ÄÂ­ÃÁ­Â¿­ÃÃ¯ÄÁ®ÃÀ®Ä¿°ÃÂ±ÅÁ¯ÆÁ®Ä½¬ÃÁ¬ÄÁ°Æ¾­ÃÀ¬ÂÂ²Æ¿°ÅÂ°ÅÃ²ÆÁ­ÆÁ±ÄÁ¬ÄÃ±ÄÃ±ÃÁ°ÆÃ®ÃÁ¯ÅÃ³ÈÅ°ÅÅ±ÈÁ³ÇÅ²ÆÁ¯ÄÃ³ÄÄ¯ÆÄ±ÇÅ³ÇÄ´ÇÄ³ÄÅ¶ÄÄ²ÅÆ±ÇÃ±ÆÅ²ÇÄ³ÇÄ³ÅÅ°ÇÆ°ÇÃ³ÇÄ³ÄÇ±ÆÃ´ÇÆ±ÅÄ³ÇÃ²ÈÇµÈÄ³ÈÇ³ÊÆ´ÈÆ°ÊÆ³ÊÃ±ÇÄ°ÅÈ²ÆÃ°ÉÇ´ÈÇ±ÊÅ´ÈÊ²ÈÅ¯ÇÆ²ÇÆ³ÆÅ¯ÇÃ¯ÈÇ³ÊÆ³ÊÅ³ÆÈ±ÈÇµÉÄ´ÆÈ´ÊÇ´ÈÅ±ÊÆ·ÊÈ³ÈÃ²ÉÆ³ÈÊµÆÆ²ÌÆµÈÇ³ÈÇ´ÌÇ¶ÉÉ³ÊÊ²ÉÊ¶ÊÈ³ÌÈ¶ÍÈµÊÊ»ÌÈ³ÊÆ·ÅÊµÊÈ·ÌÈ·ÇÆ¸ÊÆ·ÊÊµËÊ¸ÉÆ·ÌÉ¶ÉÉ¹ËË·ËÈ·ÉÈ·ÊÈ¶ÎÈ¸ÊÈ¹ÍÆ¶ÌÏµÍÇµÉÉ·ÌÊ¶ÊÉ¶ÊÉ³ÊÊ·ÊÊ¶ÊÌ¸ËÇµÎÊ·ËÈºÌÍ¶ÎÊ»ÊÉ¶ÎÊ³ÊÌ»ÌÊ¸ÎÊ´ÍË¹ÌÎºÎÍ»ÐÌ¸ÌÉ¸ËÊ·ÊÌ¸ÎË»ÎÏºÐÌ»ÑÌ·ËË»ÎÌµÎÌ¸ÌÍ¸ÎË¹ÌÌ¹ÌÌ»ÌÎºÌÌ»ÎËµÍÍ¸ÐÏºÎÊºÏÌ½ÎÊ´ÏÌ¼ÎÌ¸ÌÊ¶ÉÎ¹ÎÏ¹ÐË¹ÌÌ½ÌÌ¸ÏÏ»ÍÍ¸ÌÌ¸ÌÌ¶ËÌ¸ÌÌ»ÌÌµËË»ÎÍ¹ÎÎ¾ÏÎºÎÎ¼ÎÎ»ÎÌ»ÍÎ¹ËÏºÎË¸ÌÏºÎÍ¹ÌÎºÏÌ»ÐÎ½ÑË·ÊÊºÌÎ»ÏËºÎÌ¸ÐÎ»ÎÏ»ÎÎ»ÏÎ»ÎÐ¹ÌÌ¹ÎÌ¸ÌÌ¶ÎÌ¸ÌÌ»ÍË´ÎÌºÌÌ·ÍË»ÍÍ¸ÍÌ¸ËÌ¸ÎÌ»ÐÌ»ÌÌ»ÍÎ¹ÑÌ»ÍÌ»ÐÍµÐÎ½ÌÏºÐÎ»ÎË»ÏÎ»ÑË·ÍÌ¹ÏÍºÌÏ·ÏÌ¹ÌÍ½ÊÏ¹ÍÎ»ÌÐºÎÏ¸ÍÌ»ÎÍ¸ÊÎºÎÐ¶ÎÍ¹ËÎºÎÎºÎÌ·ËÍ»ÐÌ»ÎÏ»ÌÌ¶ÏÐ·ÊË¹ÎÌ»ÌË·ÌÉ·ÎÌºÏÊ¸ÌÊ¸ÊË·ÍÌ¸ÎÌ¸ÊÌ¸ÌÎ·ÌÍ·ÌÌ¸ÌÊ¸ÍÊ·ÊÈ·ÌÎºÏÌºÍÊ»ÌÈºËÊ·ÎÌºÌÌºÌÎ¼ÎÌ¹ÎÎ¹ËÌ¼ÎÍ»ÊÎ¹ÎÍ·ÌÎ¼ÌÌºÌÌºÌÌ»ÌÏ¹ÏÌ»ÐÎ»ÍÍ¼ËÌºÐÌ·ÑÌ»ÌÌ¹ÎÌºËÎºÏÍ·ËÇ·ÉË·ÊÉµÊÊµËÈ·ÉÊºÎÎºËÌ»ËÎ»ÌÌµËÊ¸ÌÇ¸ÌÌ»ÊÌ¹ËÌ¹ÌÍ¶ÎÊ¸ÌÊºÊËºÍÌ¹ÍÎºËÌ¾ÍÎºÌÍ·ÊÊ¹ÊÉ·ÌÊ»ËËºÌÌ¸ÊÊ»ÇÍ¾ÑÌ¹ÌÌ»ÎÊºÎÊ»ÌË·ËË¸ÌË¹ÏÊ»ÌË¹ÊÍ·ËÌ·ÌÍºÌÍ¹ËÉ»ÍË¹ÊÌ·ÎÊ·ÈÌ¸ÉÎ¹ÌÌ¸ËË·ÎËºÈÊ·ÌÌ¸ÊÈ·ÉË´ÌÉ·ÉÌ·ÌËºÍÊ¸ÈÊ½ÈÎºÎÆ¹ÊÊºÊÊ¹ÌÈ·ÈÊºÈÊ·ÌÊ¶ÉÊ»ÇÌµÎÌ¸ÉÈ»ÊÉ¹ÌÌ»ÍÌ¸ÉÊºÉÎºÊÊ¸ÊÊ¸ÉÉ¸ÊÊºÊÈ¸ËË·ÌÊ·ÊË·ÊÈ´ÌÊ¸ËÆ·ÇÊ¶ÌÊ¸ÊÇ¶ÈÈµÈÉ·ÆÌµÈÉ³ÊÈ·ÉÆ¸ÆÇ·ÈÈ·ÈÇ¶ÇÊ»ÈÇµËÇ´ÇÈ·ÈÉ·ÈÆ¸ÆÇ´ÊÆµÆÆµÈÉ³ÅÉ·ÉÆ³ÈÆ¶ÇÇ¶ÆÇ°ÆÂµÄÆ´ÈÃ²ÇÆ³ÆÆ³ÇÆ´ÇÆ²ÆÃ²ÆÃ±ÇÄ³ÆÆ®ÃÃ¶ÈÃ²ÃÃ´ÆÇ²ÄÄ°ÆÄ³ÅÄ²ÄÁ¯ÃÄ²ÆÃ³ÆÁ³ÄÁ²ÁÁ´ÅÃ®ÄÁ°ÃÁ±ÆÀ¯ÃÁ³ÃÁ­ÈÀ®Á¾°ÁÃ®ÃÁ°ÃÃ®Å¿¯¾À¯À½±ÄÀ«ÃÁ¬Ã¾­½¾¯Â¾®Ã¾«¾¿®ÃÂ¬Á¾±À¿®Á¾­Ã¾¬¾»¬¾À©À½©À»®¾¾«À»«¾½«Â¿ª¼½«¿½«¾»©¾¾®¾½«À¼©¾»¬À½ª¾½«»½ª¾¼¬¿¾¨À¾®½»«¿¼ª¾¾­¾½ª¿»®½¾¬¾¿«Á»®Á½¬À½­À½®¾¾¬À¼¬½º¬¾»«½¾©¼ºª½»¬¾»©¼½¯»¸¬¼º©»¾ª»º©»»®¼¹©¼¹­»»¨»¶©º»ª½»«»½¬»¹ªº»«»»§½·¨º»©½·¨¸º§»¸§»¸©»¸«»·¨»¸¤¾´¦º¶®¹¸¦··©ºµ¨·¹¤»·§º¶¦·¹§»´¦¹¶ª»¸¤¹³¥»µ§µ´§¹³ ¸¸§º·¨º¸§¸³¤µ¶¥·³¢··£µµ§·³¦µ³¥µ³¦·°¥··©¿¹ª½·­¾·¥¿¶ª¿·¬Ã¼¬¼¹¨À·ª¾»«¼º«À¹¬Á»¬¾¸¬À¸©»¼¬¾·­¿»¬Â¸©¿¸­¾¿¬Âº§Á»¬Àº¬Á¾«Ã»¬Á»¬Ã¾©¿º¬¾¼¯Ãº¬Ã»¬¿½¯Æ½¬Ã»¬À¾¯Á»­Âº®Ã¼¯ÁÀ®Æ¿¯Â¿°Â¿©Äº®Â½°Æ¾¯Å¾¬Ä»¬Ã¾¯Á¼­Ä»¬Ã¼³Æ¿±Æ»¬Æ½¬Ç¿¬Æ¼°Ç½±ÆÁ¯ÈÁ²ÇÂ³Å¾­Å½¬Ç¾¬ÃÂ®È¿±È¿³Ê¾¯ÈÃ³ÈÃ³ÆÃ°ÉÁµÌ¿³ÉÅ³ÈÁ´ÈÁ¯ÉÃµËÃ°ÊÃ±ËÃ±ÊÅ´ÌÂ³ÇÃ³ËÂ¯ÊÁ²ÊÃ³ËÃ³ÈÀ±ÇÂ±ÈÆ³ÈÂ¶ÉÃ³ÈÅ³ÉÂ²ÊÅ³ÆÂ±ÆÃ³ÊÂ·ÈÁ³ËÂ³ÉÃ³ÌÅ´ÊÃµÌÁ´ÈÃ³ÈÁµÆÃ´ÈÀ´ÈÇ³ÊÅ·ÊÃ´ÌÅ²ÌÂ¶ËÆ¹ÎÆ¶ÌÆ³ÊÆ´ÈÇ´ÏÆ´ÌÅ¶ÌÇ³ÌÅ¶ÊÃ·ÎÆ¹ÎÆ¶ÎÄ¹ËÈ¶ËÈ·ÐÈ»ÍÇºÌÈµÌÇ³ÍÈ·ÌÈµÍÃ»ÌÆ¹ÐÃµÌÈ¶ÑÆ¹ÌÆ·ÍÇ·ÎÆºÎÈ³ÐÇ¹ÎÈ¶ÍÊ¹ÎÈ³ÌÃ·ÐÇ¸ÎÈ´ÌÈ·ÐÊ·ÑÈ¹ÐÈºÎÆ·ÐÈ¸ÍÈºÎÈ»ÓÈ¶ÏË»ÐÍ·ÎÎ»ÐÊºÐÉ»ÐÈ¹ÎÊ¹ÐÈ¹ÎÊºÐÇ·ÌË¹ÎË¶ÎÊ·ÐË½ÐË¹ÐÆ¹ÒÊ»ÒË¹ÐË¹ÒÊ·ÍÌ½ÐÇ»ÒË·ÎÊ¾ÑÊ»ÏÌºÑÌºÒÈ¶ÎÊ¹ÎÈ¼ÓÉ¹ÐË·ÐÊ¾ÐÌ»ÑÌ¹ÎÊ»ÎÌ»ÐÏ¼ÎÊ¾ÑÌ»ÒÌ¹ÐÎ¼ÐÐ»ÑÍºÎÈ·ÎÍ¹ÑÌ¹ÐÊ¹ÑÌ¸ÍÍ¹ÓÌ¼ÒÌ¼ÓÌ¾ÓÈ»ÐÌ¿ÎÎºÒÌ¾ÒÎ¾ÓÎ½ÒÎ¼ÐÌ½ÕÎ¼ÕÏ¿ÔÎ¼ÓÌ¼ÑÍ»ÓÌ¾ÖÍ¼ÓÎ½ÓÏ¿ÓÎÀÔÒ»ÕÌºÒÎÀÓÎ»ÕÌ¾ÑÏÀÕÐ»ÓÏÁÑÏ¼ÒÐ¼ÕÐ¾ÓÍ½ÓÌ»ÒÎ½ÓÏ½ÒÐ¾ÓÌºÓÎ»ÑÌ½ÓÎ½ÒÐ¼ÏÐ¾ÕÏ»ÓÎ¾ÓÏ¼ÓÐ¾ÓË¾ÕÑ¿ÒÑ»ÕÏ¾ÕÎ¾ÓÎ¼ÒÍ¼ÖÌ¾ÓÐ¿ÒÑÁÒÎ¿ÖÐ¾ÕÐ¿ÓÒÁÕÏ¾ÒÌ¾ÒÎÀÑÐ½ÒÌÁÕÎ»ÒÒ¾ÓÐ½ÓÍ»ÐÐÁÓÐ¼ÕÐ¿ÒÏ¾ÒÏ¼ÒÐ¼ÒÏ¾ÔÒ»ÓË¾ÒÐ½ÓÐ¼ÒÎ¾ÓÌ¾ÓÌ¼ÕÏ¿ÒÎ¼ÖÌ»ÒËÁÕÐ½ÕÎ»ÒÍ¾ÕÐÀÐÎ»ÓÐ¾ÔÎ¿ÒÎ¾ÐÒÁÕÍ½ÒÐ½ÓÐ¾ÒÑÃÔÎ¼ÓÏ¾ÖÐÁÒÎÀÓÑ»ÒÑ½ÕÍ¾ÕÐ¿ÕÌ»ÑË¾ÓÐ¿ÔÎ½ÖÎ¾ÑÎÁÓÑ»ÒÑÁÔÒ¾ÓÌÀÕÒ¼ÐÒ»ÕÍ¾ÔÎ»ÏÐ»ÔÏ¾ÑË¼ÒÎ½ÑÎ»ÒÊ¼ÒÎ¾ÒÐ¿ÑÒ¾ÒÎ½ÓÐ»ÕÎ¼ÐÐÀÓÎ»ÒËºÒÌ¾ÓË¼ÒÍ»ÒÍ¾ÓÎ½ÒÌ¾ÓÐÁÓÌ¼ÓÐ¾ÓÍÁÓÎ½ÒÍ¾ÕÎ¼ÎÒ¼ÓÐ½ÓÐ¾ÑÍ¾ÏÏÀÓÐ¿ÕÍÁÓÎ¾ÒÌ¿ÔÐÁÕÐ¾ÕÎ¿ÒÐÀÑÐ»ÕÎºÓÌ»ÒÏ¼ÒÍ¾ÒÍºÏÎ»ÒÌ¼ÒÏÁÐÍ¾ÕÎ»ÒË¼ÐÌÁÒÎ»ÑÎ¾ÑÐ¼ÒÏ»ÔÍ»ÑÎ½ÑÍÀÑÍ¾ÓÍ¾ÎÒ¸ÓÎ½ÖÎÁÑÍºÕÍ¾ÎÍÁÓÍ½ÔÍ»ÎÌ¿ÕÎÁÕÎ½ÕÍ¼ÑÌ½ÒÐ½ÑË¾ÐÐÁÒÎ½ÑÐ¾ÑÏÁÕÍ¾ÐÍ¿ÑÌ¿ÒÎ¾ÐÎ¾ÐÎ¾ÎÌ»ÓÐÀÒÐ¾ÒÌ»ÐÎ¾ÒÏ½ÐÍ¾ÕÊ¾ÑÐ¾ÐÐ¼ÕÊ¾ÒÊ½ÎÎ¿ÐÏ½ÒÎ¾ÍÌ¿ÐË»ÒÈ¼ÑÏ¾ÏÊ¾ÒÏ»ÐÌ¿ÎÍ½ÒÎ¼ÐÍ¼ÐÌ¿ÒÎ»ÌÉ¾ÐÎ½ÐÍ¹ÎÊ¾ÎÌ¼ÐÍ¼ÎÌÁÓÍ¿ÏÏ¿ÏÊ½ÑÌ¾ÐÐ¼ÓÉºÑÊ»ÒÌ»ÎË¾ÏÌ¼ÐÎ½ÓÊ¼ÓÌ½ÐÊÀÑË¾ÐÍ¼ÏÌ¹ÎÌ¼ÍÌ»ÐÎ»ÍÌ»ÎÊ¼ÍÌ¼ÐÈ½ÐÐ»ÏË¼ÍÌ¹ÎÊ½ÍÈ¼ÎÊ·ÐÈ¼ÌÈ¼ÐÍ¼ËÆ»ÌÊ»ÌÊ·ÍÈ·ËÈ»ÎÊ¸ÎÆ½ÌÊ¸ÌÆ·ÊÆµËÈ¸ÊÆ·ÌÅ¶ÌÉ¶ÊÈ´ÊÅ·ÊÃ·ÈÈµËÆ·ÌÅ³ÈÇµÊÆµÌÅºÌÄ·ÊÄ´ÊÆ¶ËÆ¹ÉÆ¶ËÃ³ÈÄ·ÊÅ·ÊÄ³ÇÅµÊÅ·ÌÃ³ÊÀ·ÊÃ³ÉÅ³ÊÂ¶ÊÅ³ÊÃ´ÈÀ·ÇÆ²ÈÁ²ÇÂµÊÃ³ÅÁ³ÈÀµÃÁ´ÈÁµÆÁ°Æ¾µÈÁ¯ÆÀ²ÆÁ¶ÇÅ±ÅÄ´ÅÁ³ÊÃ³È¿±Ç¿°Æ¾³Ë¿°Ã¾¯Ã¿³Ç¿´Ç¿®Ç½°Å¿¯ÄÂ°Â¿¯Â¾°Â½­ÃÀ¯Ä¼±Ã½±Ã¿¯Á¿¬Å¼±Ä¾¯Â¼¯Æ½¯Ã¿¯Á¿±Ä½²Â»¶ÃÁ°Æ¾³Å¾³Ã¿±Ã½°Å¿³Â¼­Æ¿¯Ã¾±Â½²Ã¾±Â½¯Ã¼³Á¼­Â¼´ÀÀ³Ã»¯Ã»¯À½¯Ã¾¯Ã¼®Â»¬Á¼­Á»®Ã½¬Á½¬À»¯Á¿­Ã¼¯Á¼­Ã¹¬À»¯¾»ª¿¸­¿½­Á¼ª¾»¬½·¬À»¬½·¬¾·¬Á»ª¾¶¬¾·«½º«¾¸¬Á·©¿·ª¾¹ª½¶«À»«¿¹¨¿¶­¿ºª»¸­¿¹¬Á»©¿µ©¼·ª½·ª¼·©¼µ­¼³ª¼µ¨½¶¦½µ©»³§¶·¦·µ¥¸·¥»¶£¹¶§¸·¡¼¹¥¸·¨º·¦½º¤»·§¸¸§¹¸¦»·§º·§½º¥»»¨»¶¨»¸¨¼¶¨¾»¤»·¥¼¸§¸º§¾¸©¼¹§¼¹¬½·¦»·¦¼º«»º¤À·¦½·«¾½¨¾»«¼ºª¾¸§¾¸¨¾º©»»¬»º©½ºª¾»ªÀ¾§½¸¬¾ºª¾»§À»§¼»©¿¹§¿½©½º¬¾½©Á»©¾¾«À¾«¾½¬¿¼«¿½ªÁ¿¨Á¿­ÁÀ¬Á¾¦Â¿®Â¼¨Â¾¨Á¼¬Ã»®À¼«Ã¾¬ÃÀ¬Æ¾®Ã¾®ÂÀ¬ÁÃ­Ä¿±ÃÀ®ÄÁ¬ÅÀ«ÁÃ³ÆÂ®ÆÃ¬ÅÁ±Ä¿°Ã¿®Á½­À¾«ÄÃ°ÅÁ¬ÃÁ­ÁÂ®Ã¿°Á¾®ÅÁ®ÆÀ°ÅÁ°ÃÂ¬ÃÂ®ÃÃ°ÇÄ®ÄÂ¯ÃÃ°ÆÃ®ÆÃ®ÃÂ¯ÅÃ¬ÆÃ¬ÆÁ³ÆÄ±ÈÂ³ÂÄ²ÆÄ°ÈÃ²ÅÅ®ÃÁ°ÉÆ²ÅÅ³ÃÄ²ÈÈ²ÈÂ²ÈÃ±ÅÃ³ÆÆ°ÄÄ²ÇÄ®ÆÀ±ÇÄ²ÄÅµÉÂ°ÅÇ²ÇÆµÉÈ·ÇÃ´ÈÇµÆÄ°ÉÄ³ÈÃ°ÉÆ³ÆÆ´ÊÃ³ÇÅ³ÆÅ³ÆÈ¶ÈÅ³ÆÆ³ÆÄµÇÆ³ÈÃ²ÆÄ²ÉÆ²ÉÃ°ÊÇ·ÊÆ´ÉÆ²ÆÇµÊÇ³ÆÆµËÃ³ÌÆ·ÉÆ³ÌÈ·ÉÉ¶ËÌ·ÌÄµÈÅ´ÌÇ³ÊÇ¶ÉÈµÊÆ³ÉÇ¶ÉÈ¶ÊË¶ÊÊµÊÈ´ÉÊ¶ÊÈµÈÃ·ÊÈ·ÎÊ¹ÌÈ¸ÊÊ³ÈÈ¶ËÇ·ÊÉ¸ËÉ·ÊÊ¶ÎÉ·ÌÈµÌÇµÌÊ·ÊÊµÌÈ¹ÌÊ·ÊÌµÍÊ·ÌÌ·ÌÊµÍÈ»ÍË¸ÊÊµÌÊ´ÌÊ·ÌÆµÉË´ÊÈ·ÌÊ¶ËË¶ËÉ·ÎÊ´ÎÉ·ÍË¹ÍÊºÏÈ·ÎÉ»ÌÌ¶ËÊºÏÊ¹ÍÇ»ÒÌ·ÍÌµÍÎ¸ÎË»ÎÌ¸ÎËºÍÌ·ÏÉ¹ÎÊ»ÐÎ¹ÎÌ·ÌÎºÒÎ·ÎÌ»ÐÌ¹ÐÎ¹ÍÍ¼ÐÍ·ÌÌ¼ÑÊ»ÏÍ»ÎÊ¹ÐÎ»ÍÌºÍÌ¸ÏÌ»ÎÌ¼ÏÍ»ÌÍºÐÉ¼ÎÌ·ÎÍ·ÌÌ»ÌÏ»ÎÍ»ÌÍ·ÐÌ»ÎÎ¾ÎË½ÏË»ÍÏ»ÎÌ»ÏË¹ÌÍ¹ÓÌºÍÎ»ÏÌ»ÑÐ¼ÎÌ½ÎÐ½ÍÏºÎÊ¾ÍÍºÍÌºÎÍºÌÎ¾ÐÏ¹ÎÌ¹ÌÏºÍÍºÎÍ»ÍÎ¹ÐÌ¹ÌÍºÍÍ»ÎÎ½ÐÌ¹ÐÍ½ÍÏ»ÏÐ·ÐÌ¸ÍÎ¸ÏÎ»ÍÍ·ÍÌ»ÎÎ·ÎÊ¸ÎÍ»ÎÎ·ÍÍºÌÌ¹ÏË»ÎÌ»ÍÎ»ÐÌ½ÌÏºÎÎ»ÎÎ»ÐÎ»ÏÍ¾ÐÌ»ÐÎ¸ÏÎ·ÎÑ¾ÐÎ·ÐÐ¼ÎÎ»ÑÏ¼ÎÎ¹ÎÌºÍÎ½ÑÎ»ÐÍºÐÐ¸ÌÎ½ËÏºÐÏ»ÏÌ¹ÎÍ»ÎÐ»ÏÍ»ÌÌ½ÏÌ½ÎÍºÊÌ¸ÌÌ¹ÎÌºÎÌ¹ÎÊ·ÊÌ·ÎËºÌÌ»ÏÊ»ÎÌ·ÍÌ»ÌË·ÎÊ»ÌÌºÌË·ÌÌ»ËÍ»ÏÌ·ÌÌ·ÌÊ½ÒÏ¹ÍÌ»ÌÌ¼ÌË»ÏÌ½ÌÌ¸ÎÎ¸ÍÌ»ÏÎ»ÌË·ÎÎºÎÎ¿ÎÎ»ÏÎ¸ÍÎ¼ÎÌ¾ÎÎ»ÎÎ»ÐÎ½ÎÐ¹ÎÊ¹ÌË¼ÌÐ·ÍÌºÎÌ¹ÍÌ»ÌÌ»ÎÌºÏÈ·ÐÌ·ÌÌ½ÎÌ»ÍÌ¸ÌÉ·ÌÏ»ÎË»ÐË»ÌÎ¹ÌÌ·ÎÌ¸ÍÎ»ÌÍºÎÎ½ËËºÎÌ¸ÎÎ»ÊÌºÎË»ÌÊ¸ÍÌ¼ÌÎ·ÏÎºÌÌ»ÌÏ¹ÊÍ·ÏÌ¼ÍÐ»ÐÎ¼ÌÎ¾ÊÌ»ÌÌ¸ÌÌ¸ÌË¸ÏËºÍÍ·ÎÍºÏÏ»ÐË¹ÌÎ¼ËÏ»ÍË»ÎÌºÊÊ¹ÍÌºÎÎºÍË¸ÌË·ÈÎ¹ÌÌ»ÎÊ¸ÈÈ¹ÌÎºÌÌ»ÌÉ»ÍÌ»ÌÊ¹ÎÍ»ÌÌºÍÌ¸ÌÊ¼ÊÊ¸ÎËºÉÈºÉÆºÌÍ¸ËÊ»ÇÊ¾ËÈ·ÌÊ·ÈÈ¸ÍÍ¸ÌÌ·ÊÌ½ÌÎ»ÍÎ·ÌÊ¸ÍÌºÊÉºÌÉ¸ÊË¸ËË»ÉÈ¸ÌÌ·ËÊ·ÊËºÊÊ¹ÊÊ¸ÊÊ·ÈÊ¹ÊÊµËÈ·ÊÊºÈÈ·ÆÈ»ÌÈ¹ÊÈ·ËÊ¶ÊÈ¹ÊÈºÈÊ·ËË·ÊÌ·ËÈ¸ÈÈµÉÌ·ÊÇ·ÈÈ³ÉÉ¸ÉÇ·ÊÈµÇÆ·ÈÆµÇÃ·ÈÈµÉÆ³ÆÄ³ÈÅ²ÆÆ¶ÄÆ´ÅÅ´ÈÄ³ÇÆ³ÆÅ±ÇÇ²ÅÃ²ÅÄ·ÆÃ´ÄÃ±ÃÆ³ÆÃ²ÄÄ´ÃÁµÆÄ²ÄÂ³ÈÀ°ÆÅ¯ÄÃ®ÃÀ³ÁÃ¯ÃÃ°ÄÀ­ÃÂ²ÄÃ²ÅÀ¯ÄÁ³ÆÄ°Ã¾®ÁÁ°ÁÂ®ÆÃ¬ÄÁ°ÁÀ¯ÄÁ°ÁÀ±ÂÀ°Ã¼®Á¾­Ã¿¯Ã¿­Â¾¬ÁÀ±Ã¿¬Á¾®Á¾¬Á¼¯Á¼®¿¼­À»°Á½­À¿¬ÃÁ¬Ã¾­Á»¬Á¿­À»¨¿¾¬¾½«À¾«¾½¯½¾«À»«Ã¹¬¾¾­À»ª¿¼¬½»¬¾»©À½®¾½±¾¼®¾»¬¿¾¬½¿°½¾®À¼­À½ª¾»«¾¼°¾»©À»¬º¹®¾½¬º¹«¾¾ª¿¸«¾¾¬¿¼«½»ª»¼§½»ªÁ½«¾¸«»º«»¸«¼¹ª¾·§¼¼¬¾»©»½«¼·ª»¾¬¾ºª¼¸«»·§¿¸©º¹¬»»¦»º¨º¸©»º¥»·¥»º§ºº¦¾·¤··¨¸¶©º·ª¹·¦¸·¨·¹£»´¨¹¹§¸¶¦¹¶¥¶·§¹·¨·³§·´©·³¦ºµ¤·³¦¸·§¶´§·²¦·µ¡¶³¡µ·§³­©·µ©½¸¬¾¸ª¿ºª¿¹¬¿»«Ã¹¬À¸ª¾¹¬Á¹©¼¹¬¾¸¬À»«Á·­¾¹§¾¸©¿º­Âº¬Á´©¾»¬À¼¯Áº§Á»ª¿º­ÁºªÃ¹¯Àº«Ã»«Âº¬Ã¼­¾»¨Á½®Ã»¯Á¼¬À¾­ÂÀ¯Ã¾®Á¼¬Á¹¬Â¼¬Ä¾«Á¼°Ã½¯Æ¾®Á¼­Â¼¯Â»ªÃº«Á¹­ÁÀ¯Ä»¯Á»®Å½®Ã¾­Â»¯Ã¾°Å¿±Ç¿¬Ä¼¯Ä¾¬ÅÁ³ÆÂ°ÈÁ®Å»´ÅÀ­Æ¾±Æ¼¯ÃÁ²ÆÁ®ÊÀ³ÆÁ±ÊÃ°ÈÁ³ÊÂ´ÊÅ²Æ½°ÈÁ°ÉÁ²ÈÁ¯ÉÂµÈÂ±ÈÀ³ÉÁ³ÈÃ°ÊÂ²ÈÂ³ÉÂ°ÈÃ³ÊÁ¹ÈÆ´ÊÁ²Ç¾²ÉÂ³ÊÁ°ÈÂ¬ÆÁ´ÆÃ³ËÃ³ÌÃ±ÊÂ°ÌÃ³ÉÄ·ÉÂ±ËÅ±ÉÂ±ËÂ²ËÃ³ÇÁ·ËÈ´ÌÅµÊÅµÉÁµÊÁ´ÈÅµÈÃµËÅ³ÈÂµÉÅ¶ÊÆ´ÎÅ·ÊÆ¶ÎÇ·ÎÇ¶ËÆµËÇ·ÊÆ¶ÍÅ´ËÃµÍÅ¶ÍÆ·ÎÇ¶ÍÈ°ËÆ»ÏÇ·ÍÈ¹ÊÅ·ÌÆ·ÌÇ¸ÍÆ·ÌÈºÐÈ¹ÎÇ¸ÌÇ·ÌÅ¶ÍÈ·ÍÈµÎÆ¹ÎÇµÎÉ¶ÍÊµÐÅ·ÍÈ¹ÌÉ¶ÍÇºÎÆ¹ÌÈºÐÈ¹ÍÇ¹ÏÊ·ÏÉºÏÇ»ÏÊ»ÐÈ¸ÐÊ¸ÐÊ¸ÐÈ¹ÌÊ·ÌË¶ÒÉ¹ÎÊ¹ÑÈ¸ÑÊ¹ÍÈ»ÒË»ÐÊ·ÐÆ¹ÏÊ»ÎÈ»ÐÉ»ÒÌ¼ÎË¹ÐË¹ÎÇ¸ÒÈ·ÐÍ¼ÐÊ»ÐË»ÐË¹ÐÈ¼ÒÊ¾ÓË¹ÑÉ¼ÐÌ¾ÐÎ¹ÐÈ¾ÏÍ»ÒË»ÒÎ»ÓÍºÓË¹ÒÍ»ÓÌ½ÐÎ»ÍÌ»ÑÌ¼ÑË¹ÑÊ»ÐÊ¼ÌÍ¹ÒÌ¾ÒË¼ÑÊ¼ÓÌ»ÒÍ¾ÒË¼ÒË»ÓÎ¾ÓÏ¼ÓÌ½ÓÊ¾ÓÌºÓÎ¾ÖÍ»ÓÊ¼ÑÎ¾ÒÌÁÒÌ½ÐÎ½ÒÍ¼ÒÏ¿ÖÍ»ÕÑ¿ÕÏÁÓÎ¿ÒÐ¼ÓÌ¼ÒÍ¿ÑÏ¼ÑÐÁÕÑ½ÕÐ¿ÓÍ½ÓÐ»ÑÏ¼ÒÎÀÒÑÀÒÎ¼ÒÎ½ÕÎ¾ÒÑ»ÒË¿ÒÐ»ÖÌÀÓÐ¾ÖÍ¾ÒÐ»ÒÐ½ÔÎÁÒÐ»ÒÍ¿ÓÐ½ÒÏ¿ÖÏ¾ÒÐÀÑÐÀÓÍ¿ÓÐ¼ÖÎ»ÓÐ½ÓÍÀÔÐ¾ÔÏ¿ÖÎÁÕÒÁÓÌÂÕÏÁÔÒÁÑÑÀÖÐ¼ÕÑÂÓÐ¿ÕÒ¿ÓÏÂÓÑ¾ÕÒ¾ÒÌ¾ÔÏ¼ÖÐ¾ÕÌ¾ÒÐ¿ÐÎ¼ÓÒ»ÓÍÀÖÎ½ÒÍ¼ÐÎ»ÒÐ¾ÕÐ½ÖÐ¿ÓÑ¾ÕÏ¿ÒÎÀÔÐ¾ÔÎ¾ÔÐÀÓÒ¾ÔÎÀÒÎ½ÓÐ»ÒÐ¾ÓÐ¾ÒÒÀ×ÏÁÖÐÁÒÐ¿×ÐÀÔÒÁÕÑ¿×ÐÀÒÌ½ÒÎ¿ÕÑ½ÕÏ¾ÒÏÁÕÐ¼ÓÑÁÓÐ¾ÒÐ¾ÕÎ¿ÐÐÀÑÑ½ÓÌ¾ÒÍ¾ÓÏ»ÖÍ¿ÒÍÀÓÌ¼ÖÐ¼ÒÍ¿ÑÍ¾ÑÍ¼ÏÏ¾ÓÍ»ÕËºÐÍ½ÐË¾ÒÍ¹ÐÍ¾ÑÒ¿ÑÎ»ÒËºÒÎ½ÓÒ½ÒÐ¾ÔÌ¾ÏÏ¼ÖÐ¿ÓÐ¿ÒÍ¾ÓÊºÔÏ½ÒÐ¿ÕÍ¾ÒÐ»ÓÎÁÖÐÁÔÐ¼ÒËÁÔÐ¾ÒÎ¾ÐÐ¼ÓÌ¹ÒÒ¾ÒÍ¿ÓË¼ÕÎÀÐÍÀÓÐ¾ÐÎÀÓÎ¼ÒË¿ÓÎ¾ÑÌÀÒÏÀÓË¾ÐÎÀÓÎ¼ÑÏ½ÕÎ¾ÒÐ½ÒÊºÑËÀÑÐ¾ÓÐÀÕÍ»ÒÍ¿ÒÐ¾ÒÏ½ÒÌ¿ÔÎ½ÒÐ»ÑÎ¿ÕÎ¾ÐÌÁÓÎ¿ÒÌ¾ÑÐ½ÓÌ¿ÒÐ½ÓÒ¾ÔÌ¾ÓÏ¼ÕÍÀÒÐ¿ÓÐÀÒÎ¼ÐÎÁÒÍ¿ÑÌ¼ÒÌ»ÓÐÀÒÍÁÓÌ¾ÒÐ¿ÒÌÀÒÐÁÔÍ½ÓÎ¼ÒÐ¼ÏÐ¿ÓÍ¼ÒÌ¾ÏÌ»ÒÌ»ÑÌºÐÎ¿ÐÍ¿ÒÍ½ÓÊ½ÓÎ¼ÐÎ½ÒÍ½ÎÌºÒÌ¾ÓÎ½ÐÐºÓÊ¼ÒË¼ÎË½ÑÍ¼ÏÌ¿ÐÊ¼ÍÐ»ÑÎÀÐÌÀÒÌ¾ÑÌ¾ÓÊÁÎÍ¼ÒÎÁÐÌÀÒÌ»ÎÌ¾ÒÊ½ÏÎ»ÍÍ½ÒÌ½ÌÈ½ÎË»ÎÊ½ÏÊ½ÍÌ¿ÌÌºÎÊÁÐÊ¼ÒÌ»ÏÊ¿ÑË»ÒÉ»ÏË½ÎÊ»ÒÊ¼ÏÌ»ÎË»ÏÊ¹ÐÆ¼ÊËºÐÄ¹ÌÊºÍÈ¾ÐÊ»ËÊ¸ÌÈ¹ÌÊ¸ËÆ¸ÉÇ»ÊÇ»ÌÄ·ÊÊ·ÌÆ´ÌÈ¶ÈÈ¼ÎÉ·ÌÆ·ÈÆ¶ÈÈ¹ÊÈ³ÈÃ¹ÈÅ¹ÎÆ·ÊÅ·ËÅ´ÊÆ¶ÊÆ¶ÊÂºÈÆ¸ÊÄµËÅ³ÌÈ³ÈÃ·ÈÅ·ËÃ¶È¿³ÆÃ³ÈÄ³ÉÃ´ÊÀ´ÆÁ³ÊÃ³ÈÁ´ÆÆ³ÉÃ´ÆÂ¶ÈÁ´Å¿²ÈÁµÅÁ´ÉÂ³ÇÀ³ÆÁ³ÆÁ²ÈÁ²ÇÃµÈÂ³ÇÁ¶Ê¿³Ç¾±È¾²Ç¿±ÇÁ°ÆÀ²Å¾±ÇÁ²ÈÁ±È¾°Ä¾³Æ¼±Ä½°Ä»®ÃÁ°Å»³Æ»®Ã»¬Ä»°Æ¾³Á¿¬ÆÀ®Â¼±Â¿±Ã¾²ÃÀ³Æ½°Ã½²ÃÀ°Ä¾³Ã½®ÃÁ³Ä½²Ç¼±Æ½³Æ¿°Ä½¯Ä»¯Á»°Ä¼±Ã¼®Á»®Â¼®Â¼²À½³Á»¬Ä»°À»¯Ã»¬Äº®¿»¯Ä»­Ã¸²À¾¯À»®Á¾¯Ã»®Á»®Á¹¬Á»³Á¹¬Á¹®¿¶¬Áº¯Á¹¬Ã¸¯Á¹°Á¹¬Á»¬¼º¬¿·¨¿º®Á¶¬Á»®¾µ«¼¶ª¼¹¬¾·ªÁ·«¿»¬¾·¬»·¬¾·«½µ«¼·¬»¸¬Á³«À¶«¾¸©½³§½¸§¾·¨»³¨½µª»¬¢²·§¹²¥¶¶©ºµ£¹³£··§¹·§»·¥¸µ¦¸·£»¸§¸¹§º·¦¹·¨»·¦»·§¼·¤½·¥¼¶©½·¨¹·¦ºµ¨¼´¦½º¥º»¨¾·¥º¸ª¾¸¦º¸¥º·§½¹©»º¨¾¸§¼»©º¿©¾ºª¾¹«À»©À»¬¾¹¬¾»¨½»©¾¸®Á¾ªÁ»©Âºª½¼§Á¼¬Àº¨¾»©¾»§À¸¥¿¼ª½½©Àº«Á»§¿¼¬Á¼¨»¼«À¾ªÁ¼©ÁÁ¬Â¾«Â¾«Â»­Á¼§À¾§¿½¬Â¾®Â¾«Á½¬ÃÀ±Ã½©Á¼¬ÄÀ¯Ã»¨ÃÁ¬¿¿¬ÄÀ«Å¿®Ã»°ÃÀ¬ÄÃ¬ÄÁ¬Ç¾¬Â¾¯Ä¾°Â½®ÁÁ°ÆÁ¬ÁÁ¬ÄÀ¬Å½®ÁÁ°ÃÁ®ÃÁ²ÃÁ±ÅÀ¬Ã¾³ÃÀ®ÃÁ¯Â¾°ÃÁ°ÆÁ°ÅÁ­ÄÃ²ÅÀ¯ÆÃ°ÆÂ°ÂÄ¯ÇÁ³ÆÂ³ÆÃ­ÆÃ°ÄÃ±ÆÃ±ÆÂ³ÃÃ±ÇÃ²ÄÃ²ÆÃ¬ÆÃ²ÆÃ°ÆÃ³ÆÃ±ÈÄ¯ÇÃ°ÆÄ²ÇÈ°ÄÃ³ÆÃ·ÈÆ¯ÆÁ²ÇÄ·ÈÇ®ÈÇ±ÇÅ´ÆÅ³ÉÄ³ÈÃµÆÃ±ÌÄ³ÈÄµÊÈ³ËÆ°ÌÅ´ÈÄµÇÇ³ÊÇ´ÆÇ³ËÈ¶ËÄ³ÈÆµÉÇµÉÃµÈÆ°ÉÇ°ËÄ³ÈÊ·ÊÉ·ËÇºÈÇ·ËÈ´ÎÈ³ÊÆ·ÊÆ¶ÈÈ¸ÌÈµÉÈµÎÄµËÇ¶ÊÉ·ÌÇ´ÊËµÊÇ¶ÉÇµÇÈ·ÈÇ³ÊÇ·ÊÈºÊÇµËÆµËË¸ÌÇµÊÊ³ÊÆ¶ËÈ¸ËË»ÏÈ¶ÈÈµÊÊ¶ÍÈ¶ËÈ¸ÎÊ¸ÎÉ¸ÎÉ·ÌÊ·ÌÊµËÈ»ÎÌºÐÊ¶ÌÈµÍË·ËÉµÌÈ¹ÌÊ·ÍÊµÏÈµÌÈ³ÌÊ¸ÐÉµÌÈ·ÌËºÌÈ·ËÊ·ÌÊ·ÏÈ¹ÎÈ¹ÌÎ·ÎÈ¹ÎÊ»ÏÌ»ÐÏ»ÑÌ»ÌÌ¸ËË¸ÍÊ·ÐÊ»ÏÌºÏË»ÎÌºÏÎ¸ÏÉ»ÎÌ½ÏÍ¾ÌÏºÐÉºÐÊ¹ÏÍ»ÍÊºÎÌ»ÐÊ¸ÎÐºÍÌ¹ÌÎºÌË¾ÌÍ¸ÎÎ½ÎÌ¹ÌÌ·ÏÎ»ÐË¹ÎÌ»ÎÊºÍÌ¹ÐÌ¿ÎÐ¸ÑÌ·ÍÌ¹ÍÌ¸ÏÊ»ÏÌºÌÍ·ÒÎ»ÌË¹ÎÍ¸ÎÌ·ÍÌ½ÐÌ¹ÏÊºÎÍ»ÍÎ½ÎÐ·ÎË¼ÐÍÁÐÐ·ÎÌ¿ÎË¾ÌÌ»ÎÌ¾ÌÌ»ÐÍ¸ÏÌ»ÍË½ÎÌ¸ÏÎºËÌ½ÏÍ¼ÑÌ»ÏÏºÌÎ·ÐÌ¼ÍË»ÏÌ¸ÎÎ¼ÌÌ·ÎÏºÎÍ»ÏÌ¼ÐÐ»ÎÒ¸ÏÎ¸ÍÏ¼ÎÌºÐÎ¾ÏÐ¼ÏÍ»ÐÍ»ÎÌºÎË¾ÐÎ»ÎÎ½ÏÎºÒÍ»ÍÏ¾ÏÎ¿ÒÎ¼ÍÎ½ÍÒ½ÐÏ»ÎÍ½ÎÎ·ÏÍ½ÏÌ½ÐÌ»ÎË·ÎÎºËË½ÐÌ¸ÌÌ¾ÊÎ¸ÍÊºÎÍ¼ÌÊ¹ÌÎ·ÎÌ»ÌÌºÌË·ËÏ·ËÉºÈËºÍË¹ÌÊºÌË´ÌÈ·ÌÌ»ÌÌ¸ÊÉ»ÊÌ¸ÌÌ·ÍÎ»ÍÌ¹ÎË¸ÍÍºÊÊ»ÎÎ»ÎÌºÎÊ·ÍÊ¾ËÐ»ÎÌ¹ÍÌ»ÎÐµÌÍºÎËºÎÍ¼ÎÇºÏÍ¹ÊÌ·ÎÉ¸ÌÌ»ÎÎ½ÐË»ÏÍ·ÊË»ÊÎ¹ÎÊ»ÎÌ½ÐÏ¸ÎË¹ÎÊ½ÊÌ»ÌÍ½ÎË¹ÍÌ·ÍÊºÌÊ¼ÍÎ¹ÎÊ»ËÊ·ÌË¼ÎÌºÊË¼ÌËºÎÍ»ÎÌ»ÏÐ»ÎÌ¹ÌÍ¹ÎÉ»ÎÍ¸ÌÊºÌÌ»ËÌµÊÌºÌÊºÎÍ»ÎÎ¹ÏÌ»ÏÎ¹ÌÌ»ÌÏ¼ÍÍ¸ÎËºÏÎ»ÌÌ½ÎÎ»ÎÍ¸ÈÎ¸ÐË¹ÌÌ¸ÏÏºËÌ»ËÍºÎÏ¸ÌÉ»ÎÌ¹ËË·ÏÌ¹ÊËºÌÈ»ÎË¹ÎÌºÌÈºËÌ·ÍÊ¹ÉÊ¸ÌÌºÍÌ»ËÌ¾ÌÊ»ÍÊ·ËÈ»ÌÊ¹ÌË·ËÍ¸ÌÊ¸ÌË·ËÈ·ÌÊ·ÊÈ¸ÊÊ¸ÎÉ¹ÈÌ·ÉÌ»ÌÊ¼ÌÎ¹ÌÇ¹ÊÌ¾ÌÍ»ÌÊ»ÈË¸ÈÊºÊË¸ÊÉºÐÊ¸ÈÊ·ËÉ¹ÊÊµÊÈ¸ÉÈ¸ÌÈºÇÈºÌÊ¸ÉÌ¸ÌÇ¹ÊÈ·ÊÉºÈÊ¹ÈÆ¹ÊÊ·ÉÇµÈÈºÊÊºÈÉ·ÊÆ·ÇÊµÊÇ¶ÉÈµÆÄ·ÈÈ·ÉÅµÈÄ¶ÇÊ¸ÉÈ´ÊÂµÈÆ¶ÈÃ³ÇÇ³ÆÄµÇÃ±ÇÆ²ÃÃ·ÆÆ³ÆÃµÅÄ·ÆÈ³ÆÁµÄÅ²ÇÅ³ÅÃ´ÆÃ´ÃÁ°ÇÀ²ÁÂ´ÈÃ²ÆÁ³ÄÀ²ÆÃ³ÆÄ²ÂÁ²Ä¾¬Ä¿²ÂÀ¯ÃÁ­Å¾¯ÅÃ²ÆÁ³Ä¿­Å¿³ÄÁ°Ã¾¬ÆÀ²Á¾®Ã¾®ÃÂ¯Ã¾®Á½®Á»ª¾¾®¿À­Á¾¬À¾¯Ã¿«Á¼°Á¾¬Ã¾¬Á¼®Ã½«Á¿¬Á¾¯¾»°¾½«Á¾ªÀº°Á»«À¾¬Á»®¾»¬Ã½¬Á»«½¸¬¾¾­Á»­¾»­»¸«¿»¬½½«¼½­Á»¬¾·­Á¸¬½¼­½¸­¿½®¾»¬¾»­»»¬Á¾­À½®»¹©¿»©¾º«»º¬½¹«½¹­½º¯¾»®¼¸­¼º®¾½¬½·¬¿ºª¹¹¬½»­»¸ª¼º­¾¸©º¹¬¾¸©»»¬½¸ª»º­»º©¾·¨¾·¬¼º§½¶¬¹¸©½·£»¶§»·©¹¹¨º¸ª¹·¬»¸ª¹·§¸µ©º¶¥»·¨·µ«»¶§º¶¨»´¨·´©º´¥¸³¦·³¤»µ©¸¶¤µ·¦¸³£¼µ¤·³¥º´¦»·¥µ³£µµ¥·²¦·­§¸¶ª»´«½»¬¼¸¬¿¶«½¹¬¿¹°¾¶«»·¬Á¹¬Á¸¬¾¹¬½¹¨Àº¬Ã¶ª¿º¬Â·¬¿º®À»­Á»¬¿¸ª¿º¬Áºª¿¾¬¾¹®Â¹¬À¹®¾»ªÁ¹¬Â¹¬Á¹°ÂºªÀ¼°¿»®Ã¼®Á½¬Ã¼±Á¼¬Å½­Â½²Ã¾±Â½¯Áº­Â¾­Æ»¬Å»®Â»¬Ã»³Áº­Â¾­Å¾­Â»³ÂÁ±Ã¾°Ä¾¯Æ¿¬Ä¾­È¼®Ä¼®Ä¾¯Çº²ÃÀ³È¼¬ÆÀ³Å¾³ÇÂ¯Ä¼±Å¾­ÆÅ²Æ¿±Æ¾±ÇÁ°ÆÁ®ÇÃ°ÆÁ°ÈÀ²È¿³ÈÂ³ÈÁ²ÅÁµÇ¿²ÇÃ´ÆÂ±È¿´ÈÅ´ÉÀ´ÈÁµÇÁ²ÆÄ³ËÅ¶ÊÂ±ÆÅ³ÊÁ³ÇÃ³ÈÁ´ÆÀ´ÈÃ³ÈÂ³ÈÀ³ÈÁ³ÈÆ´ÊÁ¶ÊÄ³ÊÂ²ÇÆµËÆ¹ÌÃ³ËÁ´ÆÆ·ÊÄ³ÊÃ·ÉÃ´ÉÅµÊÅ³ÊÄ·ÈÃµÊÁ²ÍÆ·ËÅ·ÊÆ¹ÊÅ¶ÌÆ·ËÄ·ÊÅ¹ÉÆ·ËÅµÊÅ·ÊÈ·ËÉ¶ÉÇ·ËÆ·ËÆ·ÌÈ·ÊÇ¸ÊÉ·ÌÆ¶ÌÆ·ÍÆ¶ÐÆ¹ÊÃ·ÊÇ¶ÏÊ»ÍÈºÌÌ¹ÎÈ¹ÌÆ»ÎÈ¸ÎÊ¸ÊÆ¼ÌÊ·ÐÁ·ÊÆ»ËÊ·ÎÈ»ÎÄ¹ËÈ¶ÍÊ»ÐÈºÏÇºÊÉºÑÈ¹ÎÊ½ÐÌ·ÌÈ¹ÐÈ¼ÏÊ¹ÐÊ»ÏÈºÐÊ¹ÒÇºÍÈ»ÏÇ·ÌË¼ÒÅ»ÎÌ»ÐÊ»ÓÉ»ÍÈ¸ÓÈ·ÌÈ»ÎÉºÍÌ¸ÐÈ»ÒËºÌË»ÏÊºÏÈ»ÎÊºÒÈºÍÊ½ÐÈºÓÌ»ÑÌ¿ÐÎ¾ÒÊ¹ÏË»ÐÎ¾ÒÌ¾ÐÊ¼ÐË½ÐË»ÐÈºÑÊ¾ÎÌ·ÑÍ¾ÑË½ÑÎ¾ÎÌ¾ÔË½ÑÍºÐÌ»ÐÊ¼ÑÎ½ÒÌ»ÑÈ¼ÎÎ¼ÑÌ»ÓÌ¾ÐÌ¼ÑË¼ÏÌ¿ÒÎÀÕÊ»ÒÌ¼ÐÐ¼ÒÍ»ÓÌ¾ÓÌ¾ÓÌ¾ÐÎ¾×Î¾ÓÏ¼ÒÌ¿ÓÐÁÓË¾ÒÌ¾ÐÎ¼ÓÐÁÕÍ¼ÒÐ¾ÓÑÃÒÌÂÕÍ¿ÐÌÀÒÏÁÕÎ½ÓÐ¿ÐÊ»ÒÍ¿ÐÐÂÓÍ¾ÒÌÀÐÌ¾×ÌÀÒÒ¾ÓÐÂÐÒ¼ÔÎÀÓÌÁÓÐ½×Î½ÒÎÁÓÐ»ÓÎ¾ÐÎÀÒÐ¾ÔËºÒË½ÒÎºÐÍ¾ÑÍÀÒÐ¾ÓÏ¼ÓÐÁÔÎÀÔÎ¾ÔÍÁÒÌ¼ÓÍ¿ÑÏÀÒÎ¾ÓÐ¾ÕÍ¿ÓÎ½ÐÒ¼ÓÑÁÒÎÃÕÑÁØÐÁÓÐ¾ÐÐ¾ÓÊ¿ÓÏ¾ÐÍ¾ÓÍ¾ÒÌ¾ÑÐ¿ÓÐÁÔÊÁÒÑÀÕÏ¾ÒÍÁÒÐ¾ÓÍÁÕÐÀÕÎÁÐÎ¾ÓÎ¿ÓÐÃÓÐÀÓÎ¾ÒÎÁÑÐÀÕÏÁÕÓÁÓÎ¿ÖÎ¾ÓÐ¿ÓÑÁÕÐ¾ÒÒÁÓÏ½ÑÐ¿ÖÐÃÒÒÀÓÏÀÖÎ¾ÒÐ¾ÔÍ¾ÓËÀÐÐ¿ÓÍ»ÓÑÂÑÌ¿ÔÐÀÓÐ¾ÓËÆÒÏ¿ÕÎ¾ÐË½ÏÎ¾ÕÌ½ÐÊ¾ÎÏ½ÐÈ¸ÏË¾ÌÊ½ÒÌ¾ÐÌ»ÐÍ¾ÐÍ¼ÑÌ¾ÒÒ¼ÕÌ½ÑÌ¾ÔÏ½ÓÏÁÒË¼ÒÍ¾ÐÎ»ÒÍÁÌÍ¾ÒÎ¼ÐÎ¼ÐÐÁÒÎ½ÑÌ½ÓÎÀÕÍ¼ÒÌºÓÎÁÎÎ¾ÕÒ¾ÑÎ¾ÓÎÃÕÍ½ÓÊ¾ÐÌÀÒÏ¼ÐÎ¾ÓÌÁÓÎ¼ÒÍ½ÒÍ»ÎÎ¾ÒÌ¾ÐÍÁÕÐ¿ÒÎ¾ÒË½ÒÐÀÑÐ»ÒËÁÒÐ¾ÓÌ¼ÐÍÀÐÐ¾ÐÌ¾ÔÌ¾ÓÎ»ÐÐ½ÒÐ¿ÐÍ¾ÒÌ¿ÒÎ¿ÓÎ¿ÒÐÀÒÏ¾ÓÌ¾ÒÎ¿ÕÍ¿ÎÌÂÕÏ¿ÒÍÀÐÍ¾ÐÎ¾ÓÎ¾ÒÍ¿ÒÎ¾ÒÏ¼ÐÎÁÒÌ¾ÒÌ¿ÐÍ¿ÎÎ¼ÓÌ¿ÒÍ¼ÒÍÀÓÍ¿ÒÌ½ÒÍ¾ÓË¿ÓÌ¼ÐÌÀÑÌ¼ÐÐÁÐÎ¾ÒÐÁÍÍ½ÍÏ½ÔÐ¼ÐÐÁÎÍÁÐÌ¿ÒÎ»ÎÌÀÓË¾ÐË¼ÐËÀÐÌ»ÎÍ¼ÌÉ»ÎÍ¼ÒÎÀÑÇ¾ÐÌ¼ÒÎ¿ÍÊ½ÐÌÀÐË¾ÒÏ¾ÍÌ¾ÑÍ¾ÏÌ»ÏÌºÑÍÀÏÌ»ÎË»ÎÊ»ÎÌ½ÏÌ¾ÒÌ¹ÏÊ¾ÒÊ¼ÎÍºÒÈ»ÎÌ¼ÏÊ»ÎÌ»ÎÊ½ÐÉ»ÌÌ¼ÐÈ»ÌÊ»ÌÍ»ÌÌ»ÌÇ·ÎÉºÊÉºÌÈºÏÉ¹ÌÇ¸ÊÊ»ÍÈ¹ÌÄ·ÌÆ·ÍÈ·ÍÃ·ËÆ»ÊÊ»ÈÃ¸ÍÅ¹ÊÇºÉÄ´ÌÃ½ÈÅ»ÊÈ¹ÍÃ»ÈÆ¶ÎÃ·ÈÂ»ÊÄ´ÈÅµÌÈ¹ÈÅ¹ÉÁ³ÈÅ·ÆÃ¶ÈÃ·ÈÅµÇÁ¸ÊÆ·ÊÂ°ÆÃ´ÆÁ±ÈÁ·ÇÃ±ÈÁµÈÃ²ÈÂ·ÈÃ¶ÉÃ´ÈÄ¶ÅÄ·ÊÂ¶ËÂ¶Ä¿³ÆÁ³Å¾±ÆÀ²Æ¿³Æ¾³ÈÁ³ÆÀ°Ã¾´Å¾³ÅÁ³Ä¾³ÈÁ³ÄÁ³Ã¾±Ç½³ÅÀ°Ç¾²Æ¾²Ã¼³Æ½²Æ½²Ã½±Å½²Ã¿±Æ¼­Ã¾¯Ä¼±ÁÀ·Ä¿³Æ»¬Ã»®Ä¾¯Ä¾²Â»°Å»°À¾±Ã¿³Æ¼´Å¼´Æ¾´Â¹´Ã¾®Ã¿³Á¿¯Æ¼±Â½°¾¹²Ã¿³Ã¾°¿»®Ã½²À¼¯Ä¾³¿¼²Á»¯Á½±¾»¯Æ»°¼º¬¾¼µÂ½¬Â¹±Â»¬Á¼±À»°½»³À¹°Àº¯À¸®Áº¬Àµ®¾¼±¾·¬½¹¬¼º¬½¼±¿»°Á·¯¿¸«¿¶¯¼·®¾º¬½·«»·¨¿º¬¾µª¾·®¾³ª¾µª¹µ¬¿·¬¾³¬¼´¬»³«¼µ©»³ª¼¹­¼µ«¾¸¬½´«½µ«¼µ¨º¬¤³·¢¸´¤º·©»·§»·£··¨¹·£»µ¥¼·¤¸·¥º·¤·¹¤¹º¦»¸§¹¸£»»§»·«½´©¸·¬»º¦·¶¤»µ¥º·©»¹¦»º©½·£»¸¦»¹©¼·¦½ºª½º«¼»«¿·¨¼¸©¼º©À¼¬¼»ª¼·«¾¾¦½½©¾º¬¿º¦¿¸«Á¸§À»«¼¹¬¾»ª¾¸«¾¹«½»«Á»«Áº¬Á»«¾¾¬Á¸©Á¹©¾¾©¾½¬¿¼ª¿½«Á¿«Â»©Â¿¯Á¿¬Ã»¬Á¾¨Á½¬Á¾®Á¾«Ä¾¬Ã¾¬¿º¬ÀÁ¬Â»®Á»­ÃÁ«ÃÁ¬ÃÀ¬Á¾¬Å¿¬À»®Ã¾¬Ä½®ÄÁ°Ã¿«Ã¾¬ÅÁ®Ä¾®ÃÁ²ÁÀ¬ÄÁ²ÂÂ®Ã½¯Á¿®ÁÁ­Å¿¯ÅÁ®ÁÁ¯Æ¾°ÆÃ²Æ¿°Ä¾²ÅÁ°ÃÀ¯ÄÁ¯ÂÂ°ÇÂ²ÆÁ±ÈÁ±ÃÀ°ÅÁ²ÈÁ²ÈÃ°ÃÁ¬ÄÃ±ÆÂ´ÃÅ±Ç¿±ÇÂ±ÈÅ²ÈÃ³Ç¿²ÆÈ¶ÇÃ±ÅÅ³ÄÄµÉÅ°ÈÄ´ÇÌ³ÈÂ²ÆÄ³ÈÅ³ÌÆ±ÈÄ±ÈÄ³ÇÃ³ÆÄ²ÅÄ³ÇÆ²ÊÄµÆÃ´ÇÃ²ÊÆµÆÆ·ËÄ²ÊÅµÆÆ·ÉÄµÊÄ³ÉÇ·ÈÈ¶ÌÇ°ÈÅ¶ÈÇ³ÊÆµÌÃ´ÊÃ³ÌÄ³ÈÆµÆÅ³ËÆ·ËÈ²ÊÈ´ÈÆ²ÌÇ·ÈÅ´ÊÊ³ËÇ¸ÊÈµÈÈ¯ÉÈ·ËÈ´ÊÈ¸ÊÇ¶ËÆ´ÊÇ³ËÆµÌÇ·ÊÈ³ÌÈ·ÌÆ·ÊÈ³ÌÉ·ÌÈ¸ËÇ¶ÌÇ¸ÊÆ»ÌÉµËÈ·ÍÊµÊÌ·ÎÉµÊÇ¸ÎÉ´ÉÊ´ÎÊ·ËÉºÌÊµÎÊ·ÌÈ»ÏÉ·ÍÈµÌÊ¹ÎÊ¼ÌËºÊË¹ÌÌ·ÎÊ¹ÌÈ´ÎÈ·ÎË·ÌË»ÏÈ·ËË·ÎÈ·ÍË·ËÌ·ÏÊ¹ÏÌ¹ÎÎ·ÎË¸ËÊ¼ÎË¸ËÈºÌÌ»ÍÌºÎÊ¸ÐÊºÏÊ·ÎÊ¼ÎÌ¸ÑÌºÌË·ÎÊºÎÌ¹ÏÌ¸ÒÎ»ÎÎ¹ÐÎºÍÊ»ÌÊ»ÎÌ¸ÎÍºÊÌ»ÐÊ·ÍË·ÌÌºÌÏ¸ÏÌ·ÎÌ¹ÏÎ»ÑÐ»ÍÌ»ÏÈºÐÍ¸ÎÌ¼ÌÎ·ÎË·ÎÏ·ÏÎ»ÎË¹ÑÌ»ÏÊ½ÐÌ¸ÐÈ»ÎÊ¹ÌÍ»ÌÊ»ÌÎºÎÎ·ÎÎ»ÐË»ÎÎ»ÑÌ»ÎÐºÎËºÐÍ¸ÍÌ¸ÎÍ¹ÏÎºÎË¸ÎÎºÐÎ»ÎÎ½ÐÎ»ÏÏ¹ÌÏ»ÏÎ½ÏÌ»ÎË¸ÏÎ»ÐÊ»ÎÌ¸ÎËºÎÐ»ÐÏ»ÌË¶ÐÎ¹ÌÎ¼ÌÌºÒÎ¼ÏÌ¸ÎÎ»ÎÏ¼ÏÐ»ÑÌ¼ÏÏ»ÑÌ½ÐÌ½ÎÍ¸ÌÎ½ÌÎ¸ÎÌ»ÌÌ»ÌÏÀÌÎ½ÎÎ·ÑÎ»ÐÐ¾ÎÎ¿ÐÐ»ÍÎ¼ÏÒ½ÎÎ»ËÎ¼ÎÌ»ÏÐ»ÐÌ»ËË»ÑÌ½ÎËºÌÎ¹ÎÌ¼ÎÎºÏÏ»ÐÎºÎÎ»ÎÉ¹ÌÏ¹ÌÍºÉÌ¸ÊÌ·ÎÍ·ÊÌ¹ËÉ·ÌÃ¶ÈË¸ÍÊ¸ÏÈ¶ËÉ·ÎÌºÌË¹ÌË»ÌÍ·ÎÍ»ÍÉ»ÌÎ¸ÎË·ÌÊ¸ÌÌ¹ÌÌ¶ÏÊ¸ÊÌ»ÏÌ¸ÊÌ»ÉÊºÌÌ¸ÎÊºÍÏ»ÑËºÌÎ»ÌÏ»ÎÌ¸ÎÌºÌÌ»ÍÌ»ÎÍ¸ÎÊ»ÏÌ»ÎÊ½ÌÊ¸ÏÌ·ÎÎ»ÎÊºÌÌ¼ÏÊ·ÎÎ»ÌÌ¹ÎÎ»ÎÉ»ÎÍ»ÍË»ÌÍ¸ÌÊ»ÎË¸ÍÐºÎÎ¹ÌÊ·ÏÎºÐÌ·ÌÌºÍÎ»ÊÎ½ÏÌ»ÏÌ»ÍÑ¼ÎÍºÎÍ¸ÎÊºÌÌºÌÏºÌÎ»ÉÌ¾ÎÌ¸ÊÌ¹ÍÌºÉÍ»ÐË¹ÌË½ÎÎ»ËÊ»ÎÎ¼ÍÌ»ÎÍ¹ÉË»ÎË¹ÎÌ»ÑÌ»ÍÌ»ÐÐ½ÍË»ÎÍ¸ÎÎ¸ÎËºÏÎºÊÌ»ËÈºÎÉ»ÍÊ»ÎÊ¼ÌÊ¸ÌÍ¹ÊÊ¾ÌËºÌÌ·ÊÈ»ÎË·ÊÊ·ÌË½ÌÌ»ÎÌ·ÌÈ¶ËÈµÈÎ¹ÌÊ»ÌË¸ÌË¸ÇÉ·ËÇ¸ÈËºÌË»ÌÇ·ÉÌ¼ÊÊ¹ÇË¹ÌÈ»ÊÊºÍÊ¸ÌÈ¹ÉÊ¸ÎË·ÊÈ¸ÊÉ·ÌÊ¸ÊÊ»ÉÊºÌÉ·ËÈºÊË¸ËÊ¸ËÈ¹ÌÈ·ÊÊ·ÌÉ¶ÄÆ¸ÇÄµÈÊ·ËÆ¶ÊÇ´ÊÃ³ÇÄ·ÈÄ²ÉÅ´ÆÅ²ÃÆ²ÈÅ³ÇÆ·ÆÃ²ÄÆ³ÆÄµÈÆµÈÇ´ÄÆ´ÉÄ¶ÆÄ´ÄÁ´ÅÄ·ÆÅ³ÅÆ²ÇÂ²ÇÆ´ÆÁµÁÆ³ÄÃ³ÃÄ³ÆÄ®ÄÁ°ÃÅ°ÆÁ²ÃÄ®ÄÃ®Â¾²ÃÃ²Æ¾¬Ã¿¯ÁÁ®ÄÂ¯ÆÀ´ÅÁ¯Ä¿®ÅÁ³ÁÃ­Å¾°Ä¾±ÃÁ²ÆÁ­Á¿¯Ã½¯ÂÁ¯Ã¿®Á¼¬ÂÁ®À½®Ã¿¬À¾­Â¾¯À¾­ÃÀ±Á¼­Â¾¬Â¼®Á¾¬¿¾¬Á¾ªÁ¾¬Á»¬½º­Ã¾¬¾¼±¿¾®Á¼«Á¸«¾½¬»½¬½¼«¾»¬¾¿­¾º®¾¹¬½ºªÀ½«½¸®Á»©½»©»½­¾»¬À¼«½»±¿¾°¾»¬À»±¾»¨¾»¬¾¼®¾»«¼¸ªºº«¼ºª¾º«»¸¬º»«½»©½»­¾»¬»¼§»·©À¹¬»¹¬¾»«½¶¬»¼©¾µª»»¬¹·¬¿·©»µ«º·§»·ª»¶¦¹µ§¹·ª»´¥¹ºªº´¥¹´«»»§¸µ¤½³¥¸µ§º·£ºµ§¶µ¨¹³§¹µ§·µ¥µ³¦¹´¨·³ª·³§»²¤µµ§»´¥¶µ¦·°£·´¦µ·¥·´¦·³¦µ³¦¸³¬··¬½·©¼º¬¿¹¬¾¸¦¾¸­¿·©¼·¬Á¸®½¸ªÁ¸¬¿·¬½¹«¾¶¬À¸ª¾º¬À»¬À¶¬À¸¬¾¸¬¿¶«¾¸®¿º«¾¼¯Ã»®Ã¼­¾»ª¿·¬¾º­Ä½¬Á¹¯À¼«Â¾®Ã¼±Â¾«Ã¿®½½®Â¼®Â»®Ã¼¯Ã¾´Â»¬Á¼°Ã¾³Â¼®Æ¹°Å¿°Â¶®Æ¾ªÃ»®Á¿±Á»­ÄÀ²Ç¿³Æ¾®È½¯Å¿°Ã¾±Ã¾®Â½¬ÃÀ¯È»°Á¿³Ç¾°ÅÀ³Æ¿´ÆÂ®Æ¿°Ä¾³ÇÀµÈÀ±Ã»°Å¿­Æ¾³ÆÀ±É¼¯ÈÃ³ÈÁ²ÈÁ³Æ¾°ÅÁµÇÂ¶ÈÁµÊ¿·ÇÃ·ÊÃ³ÈÁ³ÊÁ³ÆÂ³ÇÁ³Ê¾¶ÉÂ³ÈÀµÈÂ´ÈÁ³ÊÁ²ÇÂµÊÅ³ÈÀµÈÃ³ÈÁ·ÊÃ·ÈÃ³ÆÁ±ÊÁµÉÃµÌÄ´ÊÄ³ÈÃ·ÌÂ¶ËÂ³ÊÃ¹ËÅ¶ÎÇ¶ÎÅ·ÌÅ¸ÊÆ·ÌÆ¸ÊÂ¹ÊÆ´ÈÆµÊÆ´ÍÊºÌÄ¸ÈÃµÊÅ¸ÌÃ³ÈÇ·ËÆºËÇ·ÊÆ·ÍÅ»ÊÇºÌÆ¸ËÈ¶ÍÈ·ÍÈ¹ËÈ¹ÏÃ´ÎÆ¸ÌÅ¶ËÆ·ÍÈ»ÏÈ·ÎÊ¶ÌÈºÍÉºÎÇ½ÐÊºÎÈ¼ÎÈ¾ÐÆ¹ËÈ¸ÎÊ»ÏÈ¸ÌÇ·ÍË¶ÎÈ¹ÌÈ¶ÎÉ¸ÎÈ»ÏÈ¹ÎÊ»ÍÉ¹ÏÍ¹ÏÉ»ÒÊ¹ÐÇºÎÆ¾ÑÊ·ÎÉ¸ÍÊ½ÑË¼ÓÈ¾ÎË»ÐÅ»ÐÌ¹ÐÈ¾ÏÌºÌÉ»ÏÌ»ÐÊ¾ÐÊ·ÎÊ»ÐÉ¼ÐÊ¾ÎÇ¹ÐÈ¼ÐÍ»ÍÎ¼ÓÊ¼ÐÌ»ÐÌ¾ÒÌ¾ÑÌºÐÍ¼ÏË¼ÐÌºÓËºÑÊ¾ÑÌ¼ÓÌ»ÐÉ»ÎË»ÐÐ¼ÒÉ¾ÓÌ»ÓÌ¾ÑÍ»ÐÊ»ÑÌ»ÒÈ¾ÏÌ¾ÒÊ¼ÐÊ½ÓÌ»ÕÍÀÓË¼ÓÌ½ÒÌ»ÏÊ»ÐÌ»ÒÌ»ÐÊºÐË½ÑÎÁÔÉ½ÒÊ»ÐÎ½ÓÍ»ÑÎ¾ÕËÀÐÎ½ÕÌÀÐÎÀÕË¾ÒÐ¿ÒÐ¾ÖÌ¾ÕÎÁÑÍ¾ÖÍ½ÓÎ¾ÔÎ¿ÕÎ¿ÓÍ¾ÕÏ¿ÑÍ¾ÒÍÁÓÏÀÔÎ¿ÓÏ¾ÑÎÁÒÌ¿ÔÏ¿ÓÍÁÐÎÁÕÎ¾ÖÍ¿ÒÐÁÓÐ¿ÕÌÀÒÌ¼ÓÎ»ÑÎÀÒÒÁÕÎ¼ÒÐÀÒÐÃÓÐÁÓÏÀÐÍÁ×Ð¾ÓÐÂÕÎÀÓÐ¾ÕÏ¾ÒÐÁÒÐ¾ÕÎ¾ÏÎ¿ÓÒÂÓÐÁÔÎÀÓÐÀÕÎÁÕË¿ÓÐ½ÕÎ¿ÓÎ¿ÒÐ¿ÓÐÁÓÐ¿ÑÑÀÐÍ¿ÑÌ¾ÕÐÁÕÎ¾ÓÍÀÓÐÀÔÑÀÒÏ¿ÕÍ¾ÒÐ¿ÕÕÃÓÍÃÒÎ¿ÒÍ¾ÒÒÀÕÑ¿ÓÐ¾ÐÏ¿ÔÏÂÖÎ½ÒÐÂÒÐÁÕÓÃÔÑÂÓÐÁÓÒÂÓÒÀÕÐÅÖÓÁÕÏ½ÐÍ¿ÒÑÃÒÎÁÓÎ¾ÓÐ¿ÓÍÁÒÍÁÒÎ¾ÒÐÁÒÎ¾ÐÎÀÓÎ»ÒÎÀÒÎ¿ÑÌ¾ÒÌ¾ÐÎÀÕÏÀÕÌ½ÎÎ»ÐÎ¹ÐÅ¸ÍÈ»ÎÉ»ÏÈ¾ÏÏ¿ÑÌ½ÏÌ»ÑÏÀÐÊ¿ÒÌÀÑÌ¼ÐÎÀÒÏ¿ÐÌ»ÏÐÂÑÎ½ÏÊ½ÒÍ¼ÒÏ»ÑÌ¿ÑÎ¾ÓÎ¿ÒÎ½ÑÎÀÒÏºÐÐÀÓÌ¿ÑÐ¾ÓÐÀÔÎÁÕÍ»ÓÐ¾ÒÐÄÖÏ¾ÔÎÀÓÍÁÒÐÁÑÎ¾ÒÏ½ÒÌ¾ÐÎ¼ÒÍ¿ÏÍ¿ÒÐ¿ÑÏÀÓÌ¾ÑÍ½ÒÌÁÓÎ¿ÐÎ»ÑÏ¾ÐÏÀÖÎ¼ÒÎ¿ÓÐ¾ÐÐ¿ÔÐ¾ÒÐÁÓÌÁÒÒÀÔÒÂÐÎ¾ÓÌÀÑÎÁÍÌ¾ÐÎ¾ÐË½ÒÎÂÓÎ¾ÒË¾ÎÍÀÒÐÁÕÌÁÑÍÁÓÑ¼ÒÍÁÓÐÁÒÐ¼ÒÌÁÒÎ¾ÏÍ½ÐÑ¾ÒÍ¿ÑÑÁÒË¿ÓÊÂÐÎÀÐÏ¾ÒËÁÐÌ¿ÑÏ¾ÐÌ¾ÐÎÁÕÌÁÐÊ¾ÍÌ¾ÓÍ¾ÑÌ¾ÎÍ¿ÏÎ¼ÐÌ¿ÏÊ»ÍÎÁÐËÁÐÌ½ÐÌ»ÍÊ½ÐÌ¿ÏÎ¿ÐÌ¾ÐÇ»ÎÎ¿ÐÎÀÒÈ¼ÎÍ¼ÐÎ»ÑÊÀÐÌ¾ÍÌ¼ÎË½ÐÎ¾ÐÈ¾ÐË¿ÍË¾ÏÊ¼ÐË»ÎÈ½ÐË¾ÐÊ¿ÏË½ÎÉ»ÑÌ½ÎÌ¿ÎÌ¿ÑÊ»ÏÌ¼ÏÊ½ÐÈ½ÐÈÀÐÌ¼ÐÆºËÈ»ÍÈ½ÎÈ¹ÌÈ»ÏÆ»ÊÈ¹ÊÆ¹ÌÇ´ËÆ·ÌÈºÉÇ¼ÊÆ»ÍÈ¼ÌÆ¸ÊÆºÌÈ»ÊÇ·ÌÇµÊÆ¼ËÈ»ÈÃ¶ÊÅ¹ÊÆ´ÉÅ¸ÌÇ¶ÊÂºÇÆ»ÍÅ·ÉÃ¹ÈÃµÉÃ¶ÈÃµÊÃ¶ÈÃµÆÀ·ÈÁ¶ÊÈ¶ÊÀ¶ÈÃ·ÉÂ³ÈÃ·ÇÁ·ÌÃ³ÈÀ³ÉÂ¶ÈÀ°ÇÃ¶ÈÂ¶ÆÃ³Å¾³ÈÁ´ÈÀ´Æ½µÉÁµÆÀµÈÀ´È¾²È¿³ÈÀ³ÇÀ²ÆÀ´Æ¿³ÈÀ±Å¼´È¾µÃ¾³ÃÁ³ÂÀ²Å»³Å¼®Ä¾´ÇÀ³Ã»³Å¿°Å¾±Ä¹¯Ã½¯Á½°Å¼­Ã»°Ã»®Á¸µÁ¼³Ã½±Ä»³Âº°Ã¿²Ã¿´Â¾´Ã½²Ã¾¯Â»´Ã¾±ÃÀ°Âº±Á»³Ã»¯Á»°Á»³Ä¼°Â»¯Á¼®¿¾­Ã»±¿¼¯Ã¹¯Á¾³Á½²Á»®Â¶¯Ã¼®¿¾³Â¹¯¾½±Àº¯Ã½±Á»°Å¼±Áº°Á»°¾¼¬À»­¾·¬¿¸¬¿º­½µ­¿¹¬¾¹¬½»¬¾»¬¾¹¬¾·­¼¹¬¿¹«½µ¯»¸­Áµ¬¾´­»µ¯¼·¬½·«¼³¬»·ªÂµ¬À³ª»·©¹¶¬»´¨¾·¬»¶¬¾µ®¹µ¬¸º«¼¬¢¯´£¹µ¡¸·¦·µ¤½³¢º·§¸·¤¿¸¥¼·¤»µ¥¹¶¡»µ¦¸¸¢¹¶£»¹¤»¸¦¸·¦¾µ£¼¶£·¸¥»µ¤··§¹¸¨½º§½¸©¾·¦»´¥»¸¦»µ¨»»¤¼¹©½¸§½¶¦¾»ª¾º«¾»©¾»¥¾¸©¿»«¿¸¤½ºª»»¬Àº¨¼º¬À¸©¾º©Á½¬Àº§¿½ª¾¹¬¿¼¬Ãº«Ã»¬¿¿­Â»«Á»®Ã»«¿»«À¼ª¾¾ªÀ¾©Ã¸©Á¾¬Ã¾§Ã»©ÁÁ°Ã¾¬Á½¨Ã¾©Ã¼«ÃÁ«Â»¬Â¾©Ã¾©ÆÁ¨ÁÀ®Ã¾«Â¾«Ã¾¬Æ½©ÁÁ°ÃÀ¬ÅÂ®Ã¾¬ÃÁ¯Á¿¬ÃÃ¯ÄÀ°Á½¯Á½¬Ä¾¯ÃÂ°ÄÀ­ÆÀ®ÅÃ­Æ¾¬ÃÁ°Á¿­Ç¿²ÆÁ®ÇÁ±ÄÀ¬ÅÁ®ÅÃ²ÆÂ­ÆÁ¬ÄÂ³ÆÁ±ÆÃ³ÇÃ®ÃÆ­ÇÁ°ÇÂ²ÄÁ°ËÃ±ÆÀ±ÈÅ³ÈÅ±ÃÂ°ÈÀ³ÅÂ¯ÇÃ°ÆÃ°ÆÃ±ÇÃ­ÆÇ²ÊÆµÇÁ´ÉÅ²ÈÄ¯ÊÃ´ÌÃ³ÈÆ¯ÇÃ²ÅÅ³ÉÃ°ÆÆ²ÊÆ³ÆÆ²ÉÄ³ÈÃ³ÆÃµÌÆ³ÉÂ³ÈÆ¶ÉÇ³ÊÆ¶ÉÊµËÆ²ËÆ´ÊÄ¶ÉÉ·ÊÇµÊÄ³ÈÆ°ÊÄ·ÊÇ¸ÊÈµÉÆ³ÈÇ¸ËÇµÊÇ´ÉÇ³ÈÇ¶ÍÄ³ÈÄµÊÉ´ÌÇ·ËË·ËÈµÍÆ°ÈÇ³ÈÊ³ÌÆ´ÊÈ³ÊÈ¶ÌÆ³ÈÆµÉÈ·ÌÈµÌÈ´ÊÇ³ÌÇ¶ÍÈ·ËÉ·ÉÇ¶ÌÌµÊÊ·ÎÉ¶ÌÆ¶ÌÌ»ÊÉºÎÈµÌÈ·ËË»ÈÊµÈÆ´ÌË·ÌÊ·ÌÊ¶ÊÄµÌÉ°ËÈ·ÌÈ´ÍÈ·ËË»ÎÌºÌÊ¹ËÈ¶ÌÊ¶ÌË³ÌÈµÌÈ¶ÍÊ¸ÍÍ·ÌË¸ÏÌµÌÊ·ÌÌºÎÌ¹ÏÈ¯ÌÈµÊÌ·ÎÈ±ÍÌ¸ÌÊ·ÊËºÌÊ¸ÏÊ¸ÐÍ·ÎÌ¾ÏÍ·ÎÌ¹ÑÌºÎÌ»ÎÍ¹ÐË¹ÎË»ÌÊ¹ÏÎ»ÐÊºÌÍ¶ÒÍ»ÎÉºÎÊ·ÎË»ÌÊºÌÌ¹ÎÏ·ÌÊºÏÎ¼ÏÌ»ÏË¸ÊÊ¹ÍÊ´ÎÌ»ÌÊ¸ÎÌ¸ÍÌ¹ÒË»ÍÊ·ÎÊ»ÎÍ¹ÎÊ¹ÒÎ¹ÌÊ¸ÎÌ¸ÎÎºÎÊ»ÏÌºÏÍ¸ÎÌ¼ÐÌ»ÎÌ»ÍÎ¸ÎÌ»ÎÌ¸ÍÌºÐÊ»ÏÎ»ÐÌ¾ÎÎ·ÐÌ¼ÎÌ·ÊÍ»ÏÐ¸ÐÎ¹ÎÌ¾ÐÎ¸ÏÌ»ÍÍ»ÏÎ»ÏÌ¸ÍÌ½ÏÌºÎÏºÐÎºÎË¾ÐÏºÎÎºÍÏ»ÎÌ¸ÏÌ¸ÐÎ½ÐÏ¸ÏÎ¸ÎÎ½ÏÐ·ÎÎ½ÎÌ¼ÌÎ»ÏÒ»ÐÎºÏÌ»ÏÎ»ÎÎ½ÌÎ½ÎÍ»ÐÑ»ÐÎºÎÍ»ÎÈ¹ÎÊºÎÌ»ÎÍ»ÌÌ»ÐÍ»ÌÊ¸ËÊ·ÌÌ»ËÐ¸ÏÌ»ËÌ·ÊÊºÈÊ¾ÌÌ¹ÌË·ÌÊºÊË·ÎÊ¹ËÌ»ÌÉ·ÌÌ¹ËÊ¸ËÊ·ËÆ²ÈÈµÆÊ·ÊÈ·ÇÇ·ÊÌ·ÌËµÉÈ´ÆÄµÌË¸ËÉºÊË»ÊË¹ÌÍ»ÎÎ¸ËÌ´ÉÊ¸ËÊ¸ËÍ¸ÏÊ»ÌÊ¹ÌÏºÌÊ¹ËÊ»ËÌºÑÌ¾ÑÐ»ÎÌ¸ËÉ¹ÎÌ»ÌÐ¼ÍÎ»ÏÊ½ËÎ·ÎÎ»ÎÎ»ÊÌºÐÎ»ÏÍ·ÌÊ»ÏÏ¹ÏÌ¹ÌÌ»ÌÏ·ÌÌ·ÍÌºÎÌºÎÊ·ÌÊºÊÊ¹ÌÉ¹ÐÍ»ÊËºÎÌ·ÌË»ÎÌ¼ÌÏ¸ÌÌ¸ÎÎ»ÌÍ¹ÏË»ÌÐ¼ÎÌºÎÈºÌÌ»ÏÏ¹ÎÍ½ÒÊ»ÍË»ÌÌ·ÌÊºÏÌ»ÍÎºÌÌ·ÌË¸ÎÎºÐÌ¸ÎÍ»ÐÊºÎÊ¸ÊÊºÌÌ»ÌÍ·ËÎ¼ÌÌ¹ËÌ»ÍË·ÌÏ·ÌÊºÌÌ»ÍÌ¸ÌÊ¹ÌÌ¹ÌÎ¸ÐÌ·ÊÊºÎÌ¶ÎÊ»ËÊ¼ÊÌ»ÊÌ»ÌÊ»ÎË¸ÌÌ»ÊÈ¹ËÌ¹ÎÊ¹ÍÊµÊÊ¹ÊÊ·ÍÊ·ÊÊ¸ÈÇ·ÊÉ»ÌÊºÊÌ·ÊÊ·ÎÊ·ÌÉ·ËÊ´ÈÈºËÌ¸ËÌ·ÍÈ¸ÉÉµÊÊ·ÎÉ¹ÈÈ»ÌÈ·ÊÈ¶ÊÉ¹ÊÌºÌÉ¸ÉÉ¸ÇÊ·ÈÆ¸ÉÇ·ÌÉ´ÉÉ·ÉÆ·ÊÄ¹ÌÆ³ÈÇ·ÆÆ³ÇÃ·ÈÅ¶ÈÅ²ÈÄ´ÆÅ³ÇÇµÇÄ³ÆÃ²ÊÂ°ÇÆ´ÈÃµÆÆ³ÇÅ²ÃÆ´ÆÊ·ÇÂ´ÆÆ·ÉÃ¶ÄÂ³ÈÅ¯ÃÂ³ÆÈ³ÃÄ®ÅÁ°ÇÁ®ÈÃ³ÃÂ¯ÅÄ³Ã¿²ÆÃ±ÂÃ¯Å¾±ÅÃ®ÅÃ°ÃÁ¯Æ¾«ÃÁ±ÃÃ±ÃÀ±ÅÁ²Ã¾¬ÁÂ°Ä¿±ÇÀ®ÄÀ®ÀÁ¯Ä¿¬Â¾¬Ã¾­ÂÁ©Ã¾®ÄÁ°Ã¾°ÃÀ¯Ä»¬Á¾­Ã½¬Á¾­ÃÀ­ÀÀ©Ã¸¬¾¾®Ã¾©Á½­¾»©¼¾­Ã¾®Ã¿¯Áº¬À¾¯Á»¬À½¦À»ªÁ¾¬Á¸©¿¸ª½º¨¾º©½»­¿¹®Â¼¬¿»«¾»¬¾»­¾º©Á¼¨¾»¬¿¹¬¿»¨¼¹®¾»¬¾¼©¾º­½½®¾º¬½»«¿¹«»½«½·¨¾»¨Àº«¿»«¾º§¾º©À·®½½¬½¼«½º«»¶¬¼·¨½·¨¼¸ª¼¸¨»»¬»¸©¿¸©ºµ©º¹©»·ª»¶§»·«·¹¦»»¦¹µ«º¸©¼¸©½¸ª·¸¤¼³¤¸¶§¸³¦·µ¥¸³§¸µ©¸µ£º´§·µ¤º¶¦»µ¥º´£·¸¢·µ¦¸³§µ²¤º²¤·µ§µµ£·³¦·µ¦¸´¦·¯¨··©½¹«¿·®¾µ¬À·§¼·¬¾º­¾¶«¾·¬À·­¾·«¿·¨»»¬Áº¯½º¬À¹­½¹©¿¹¬¿·ª¼º©¾·¬Â»¬¾º®Àº¬Â¾®Á¹¬¿º®¿»­¿º¬Ä»®Ã¸®¿»­Â»®Á»®Ä»±Ã¾®Â¼¯Á¼°Á¾¯Á¾­Á¼²ÃÀ±Ã»¬À¾¯Ã¾¯Å½°Äº®Á½¯Ã»¯Á½°Å¾³ÂÀ°Æ¾³ÂÀ±Ã¿²Æ¾²ÅÀ®Æ½³Äº±Ã¾¯Ã¾¯Ã¿±Ã¿³ÉÁ¯È½°ÃÀ²Å¿³ÇÁ³ÆÁ²Ç¾±ÃÁ³È¾³ÆÃ°ÆÀ¶È¾³Ã¿³ÈÂ³ÇÂ³ÆÃ³É¾®ÈÃ±ÆÃ³ÊÂ¶ÈÁµÇÃ³ÇÂ²Ê¿·ÇÀ³Ç¾¶ÇÂ°ÉÂ¶ÆÃµÈÁ³ÈÂ´ÉÅ³ÉÃ·ÊÃ±ÆÄ´ÈÄ³ÈÃµËÆµÊÃµÌÂ´ÊÃµÆÅ±ÉÃ·ÉÃ¹ÊÁ´ÆÃ·ÊÆ¸ÉÃ³ÌÇ³ÊÅ·ÌÈ·ÎÅ·ÌÈ¸ËÈ¶ÊÆ´ËÁ¸ÎÄ·ÊÇ·ÊÈ·ÎÅ·ÉÅ¶ÎÃ¶ÎÆºËÆ·ÌÄ¶ÈÇµÌÆµÊÈ¹ÎÇ¹ÎÆ·ËÆ¶ÌÅºÌÄ²ÌÆ»ÊÇ¸ÌÈ¹ÌÊ¹ÍÇ·ÌÆ·ÍÄºÌÆºËÉ¹ÑÉ»ÐÆ¹ÎÌ¹ÌÇ¹ÎÈºÒÈ»ÍÈµÌÉ¶ÎÈ¼ÍË¸ÎÉ¹ÎÊ¼ÎÊºÐÉ¹ÌÉºÍË½ÎË»ÐÇ»ÏÊ¾ÐÈ¹ÎË¸ÌÊ»ÐÇ¹ÏÊ»ÎÈ»ÎÊ¼ÐÊÀÐËºÍÊ¼ÎÊ¹ÌÈ¾ÓÉ»ÎÇºÎÊ·ÌÊ¾ÐÌ¼ÎÇºÐË»ÐÈ¹ÎÌ½ÐÊ¼ÓÌ¾ÐÊ»ÐË¾ÓÈ»ÏÌºÐË½ÔÍ¾ÕÊ¹ÍÊ»ÌÊ»ÏÊ½ÐÊ¾ÐÊ»ÒÉºÎË½ÕÏ¼ÎÉ¼ÏÌ»ÒÊ¼ÏÊ¿ÒÊ½ÒÊºÏÌ¾ÎÊ»ÎÌ»ÏÉ¶ÏË½ÎÍ¼ÐË»ÒÊ»ÐÍ¾ÕÌ¼ÒÎ¾ÏÊ»ÑË·ÓÍ¼ÐÉ½ÒÈ»ÒÌ¾ÒËºÑÌ¼ÓÌ½ÑÏ¼ÒÎ»ÕÌÁÐÍ¼ÓÍÁÓÌÂÐÌÃÐÐ½ÖÎ¾ÔÐÄÕÎºÓÐ¾ÓÎ¼ÓÐ¿×ÍÀÒÎ¾ÑÎÀÒÍ½ÒÐ¾ÏË¾ÒÍ»ÒÎ¿ÏÏÀÑÐ¼ÕÑ¾ÒÌÁÓÍ½ÓÎ¿ÑÎ¾ÕÎ½ÒÎ¾ÒÌÀÓÐ»ÐÎÀÓÐ¾ÓÐ¿ÖÌ¿ÎÊÁÑÎ»ÒÌ½ÓÊ¿ÓÒÃÖÌ»ÑÐ¿ÑÏ¿ÒÏ½ÒÐÁÐÎÁÒÎ¾ÒÎ½ÕÍ¾ÑÏÀÕÎÀÒÐÀÕÎÁÕÎ»ÑÐÂÕÑÁØÍÁÓÎ¿ÐÎÁÒÐ¾ÒÏÁÑÎÂÓÎÀÐÏÁÓÎ¾ÕÎ¿ÓÎÁÖÑÃÕÓÀÔÎ¾ÕÐÁÕÐÀÔÎ¾ÒÒÂÒÓ¾ÓÎ¿ÒÎ¿ÒÒÀÓÎ¿ÔÒ¾ÏÍÁÔÎÁÐÒÃÓÎÂÓÎ¾ÑÑ¿ÑÐÁÒÐÁÑÎ¿ÒÎ¾ÒÐ¿ÎÍÀÐÌ¿ÐÍºÎË¼ÊÐÂÎË¿ÎÊºÊÈ¹ÍÊ»ÌÌ¾ÊÌ¿ÊÎ¾ÌÊ¼ÏÉ¼ÊÊ¼ÒÎ¿ÐÊ¼ÑÐ¾ÐÌ¿ÏÍÀÎÍÀÏÊ¾ÎÌ½ÏÍÀÍÈ¸ËÅ¶ÇÊ»ÈÍ¿ËÈ¾ÍÊ»ÊÆ¹ÈÃ·ÇÊ³ÊÏ»ÌË¾ÌÎ½ÐÌ¿ÏÍ¾ÏÊ¿ÎÐ»ÒÌÁÓÌÁÎÎ¼ÕÐ¾ÓÍÀÐÍ¿ÓÎ¿ÒÐÀÐÏ¾ÕÎ¾ÑÍ¿ÕÒ¾ÑÐ½ÓÎ¾ÐÐ¾ÐÎÀÓÐÀÓÎ¼ÐÎ¾ÓÒ½ÓÓÂÕÐ¿ÒÎ¾ÒÍÁÑÐ¾ÒÍÀÒÏÀÐÍ¼ÓÐÁÐÍ¿ÒÌ¼ÓÐ»ÐÏÁÐÎÁÒÌ»ÓÏÁÐÎ¿ÓÎÀÑÌÀÒÏÂÒÐ¿ÒÎ½ÐÒ¾ÐÍÁÐÓ¾ÑÍÁÕÌÀÐÊ¾ÒÐÂÒÎ¾ÑÏ¿ÒÏÁÒÌ¿ÕÐ¾ÓÌÀÐÒ¾ÓÌÁÔÌ¿ÑÎÂÓÍÀÑÐÀÎÐ¼ÐÌÁÓÎ¾ÒÎ¾ÒÎÂÐÌ½ÒÍ¿ÐÏÀÓÌ½ÏÌ¿ÒÏÁÕÎ¿ÎÌÁÒÐ¿ÐÌ»ÒÎÀÓÎ¿ÑÌÀÎÎÁÐÌ½ÓÌ¾ÍÎÁÒÍ¼ÐÏ½ÎÍ¿ÒÎÀÑÌ½ÑË¿ÐË½ÎÊ»ÐÊºÍÊ½ÐÍ¿ÍÌ¾ÐË»ÌËÀÒÌ¿ÐÌÁÎÎ¾ÒÍ¾ÏÌÁÐË»ÐË¾ÐÎÁÒÍ¾ÐÏ¼ÐÊ»ÍÎ½ÎÌ¹ÐÈÁÎÊ¾ÓÌ¾ÒÊ¾ÎÊ»ÏÊ½ÏÌ¿ÌÈ¾ÎÍ»ÏÌ¾ÎÈ¼ÎÌ¼ÐÌ»ÍÈ¼ÐÉ¸ÍÈ»ÐÉ¾ÍÊºÎÈ»ÌÈºÍÇ¸ÍÉ»ËÈ¸ÊÉºÌÆºËÆ»ÍÇ¹ÌÆ¹ÉÆ»ÊÉ¸ÌÈºÍÆ¸ÌÃ¹ËÊ»ÍÉ¹ÊÅ¹ÊÈ¹ÍÄ¶ÈÆºÎÉ·ÌÆ»ÉÅ»ÌÈ¸ÊÅ¸ÈÅµÅÆ¶ËÅ¶ÊÂ·ÆÄ¶ÊÆ¶ËÈ¶ÌÆ¸ÈÂ´ÆÂ´ÈÂ´ÈÂ³ÆÄºÆÂ·ÉÂ´ÆÁµÇÁ´ÈÁ³ÉÀµÇÀ³ÆÁ³ÆÁ¶Ç¿³ÅÁµÆÀ´Ç¼¶ÆÀ²È¿³Ã¾·ÃÁ±È¿¯Æ¿³ÇÁ´Ç¾±Æ¾´Æ¾³ÇÁ®Æ¿³Ä¾±Æ¾±Ç¼³ÃÃ³Å½³ÅÁ°Ä½°ÃÁ°Æ½²ÂÀµÂÁ²ÆÁ¯Á¾°Â¼¯Ã¾±Àº³Â¾²Ã¼°Ãº²Á¹²Â¿²Ã¾µÄº±Á½³Ã¼²Á»³Ã½³Ã¾³¿½³Â½³Â¾³ÃÀµÃ»¯Â¼³Á¹¯¾¼°Â¼²Á·¯À½¯À½°Á¾·Á¼®Ã¾¬Â»®¿½²Ã»¯¿»­¾»´¿¼®Â»±¿¹°Á¹®Âº®½º¯¾¶¬Á»¬Á»°¿¹­Á»­»¹³»¸°¿º­¼¸­»¹®½¶­¾¶®¹·®¾º¬¼·¬½º¬¾¸ª¾´¬¾·¬¼´ª¾¹¬¾·ª»µ¬½µ¬ºµ«º³¬¾º¬¼¶ª»´¬¾´¬¾·«»¹¨À®¡´³£¸³¤·µ¥¹¶¤··§¸³¶·¥»¶¦¸µ¢º·¦»º¦··£»¶¥··¦¼¸¤»¹©»¶¥»·¤º¸§··¥º·£º·¦¼·¥»º©½º¦»·§¸º¦¾´§½¸§¼¹¥½º©½·§½¸¨Áº¨¿»©¼º«Á¼¦¾·¨½»©½¸§Á»©¾º«¾»©¾½¨¿»§¿»§½º­½º§¼¿¬À¸©¿»«À¹«À½¬Á¾ªÃ½¬¿º¬Á¹¬À¹­Ã¼¨Ã½¬Á½©Á¾ªÁ¿«À¾®Ã¾¬Â¾«Ã½®Á¿²Å¿«Á¿­À¾®Â¼¬Á¾®Ã¿«ÁÁ«Ã¾¬ÁÂ­Ä¾¬Ã¿±ÃÀ¬Ã¾®Å¿ªÃ¾©Ä¾¬Æ¾¯Ã¾²ÂÁ¬ÃÀ±ÃÀ¬Æ¿«Å¿®Á¿®ÃÁ©ÃÀ±Å¿³ÄÁ©ÃÁ¯ÄÁ²ÆÃ­ÃÄ±È¾¯ÃÁ±ÆÁ®ÆÂ±ÆÃ®ÄÀ®ÇÃ³ÆÁ±ÅÁ±ÆÂ®ÆÃ®ÆÂ²ÊÃ¬ÆÁ°ÇÄ²ÇÀ±ÈÃ²ÈÂ³ÇÆ³ÇÂ³ÇÅ²ÉÆ²ÈÇ²ÈÅ´ÆÄ²ÉÃ³ÇÄ³ÈÆ±ÆÆ³ÈÇ¯ÈÆ°ÉÃ³ÇÃ³ÇÆ²ÈÅ³ÆÃ³ÊÅ°ÈÃµÆÃ³ÈÈ³ÈÅ²ÈÆ³ÆÆ²ÌÅ³ÈÃ³ÊÇµÈÇµÊÅ·ÌÈ³ÊÇ³ÊÃ·ÉÊ³ÌÆ±ÈÆ¶ÉÆ¶ÈÈ·ËÃ³ÄÈ´ÌÊµÌÈµËÆµÊÆµÈÅ¶ÇÇ·ÊÆ³ÍÅ³ÈÇ´ÉÇ·ÊÇ²ÇÅ³ÌË·ÍÇµÉÈ´ËÊ¶ÌÉµÌÈµÌÈ³ÍÄ²ÉÈ´ÊÈ¸ËÉ²ÌÆ·ÎÊ¶ËËµÊÈºÊÇ´ÌÌ¸ÌÈµÊÆ·ÌÈµÎÈµÍÉ¹ÌÌ·ÎÊ¹ÎË·ÉÈ·ÍÌ·ÊÈ·ÎÌµÌÈ¹ÌÈ·ÊÉ¶ÍÍ¶ËÉ¸ÌÊ¶ËÉ·ÍÊ·ÊÆµÊÊ·ÌÈ¶ËÊ³ÊÌ·ÌÊ·ËÌºÌÊ·ÎÈ¹ÌË¸ÐÊµÏÉºÎË»ÎË·ÐÊµÍÊ·ÌÊ·ÌÇ¶ËÊ·ÌÉºÑÊµÎÌ·ÎÊ»ÏÌ·ÏË½ËÌµÏËºÎÌ»ÌÌ·ÏÎ¹ÏÌ·ÎÎ½ÏÎ»ÒÊ¹ÎÌ»ÐÌ»ÏÍ¹ÍÌ¹ÎÍºÏÌ·ÌÌºÒÌ¹ÎÍµÎÎ»ÏÏ¹ÐÌºÐÌ»ÍÌ¹ÏÌ¸ÏÊ»ÏÊ»ÐÊ¸ÐÌºÎË¸ÎÍºÑÌºÎÎ¸ÑÌ¸ÐË·ÌË¼ÐË¸ÏÊ·ÎÉ¼ÌÏ¸ÒÌºÒË½ÎÎ¹ÍÌ¸ÎÍºÏÈ½ÐËºÎÌ¼ÎË¸ÒÎ¹ÎÍºÎÌ»ÑÐ¹ÐÎ»ÎÎ»ÏÌ»ÎÊ·ËÏ·ÑË·ÎÌ»ÏÊºÑÌºÐÍ»ÏÎ»ÌÎ»ÐÌºÌÌ¾ÎÐ¹ÐÍ½ÏÌ»ÏÎ½ÌÎ¸ÎÏ»ÏÎ¼ÌÌ»ÐÐ½ÎÎºÎÎ·ÎÉ·ÉÊ·ÎÎºÌÈ·ÊÌ·ÉÎ»ÍË»ËÐ»ÌÌ¸ÈÎ¹ÇÊ»ÊÌ·ÇÍºÆÆ³ÅÇ³ÃÆ²ÂÈ·ÃÈ°ÇÀ°Á»­»¾­ºÁ²¿Å³¿È³ÂÃ³ÃÃ³ÃÇµÄÈ·ÉÆ³ÆÆ¹ÈÊ³ÉÆ³ÂÉ·ÅÊºÆÈ¶ÃÆ³ÁÈ¯ÃÄ²ÁÄµÁÇ¯ÁÁ³¾Á°½·§À¾ª½È´ÆÊºÈÈ·ÄÃ±ÃÃ³ÇË»ËÍ¹ÇÌ·ÊÉ·ÊÊ¹ÊË½ÎÍ·ÎË¸ÌÎºÎÍ¹ÎÍºËÎ»ÎÌ»ÐÌ»ÎÌºÎÊ¸ËÌ»ÎÎ»ÎÍ»ÎÌ»ÎÌ»ÏÐ¾ÐÌ¸ÌÌ»ÌÍ¹ÐÊ·ÌÈ»ÎÌ»ÎÌ»ÏÎ·ÎÎºÌÊ¹ÌÌ¸ÏÎ¸ÐÌ¸ËÌ¸ÍÌºÐË¹ÎÌ¸ÍÎºÌÌ»ÐÎ¸ÏÌ¹ÎÌ»ÐÏ»ÐÎ»ÍÊ¹ÍË¸ÍÊºÏÌ¹ÌÊ¸ÍÌ»ÌÍ½ÏÏ¹ÎË»ËÊ¼ÌÌ»ÌÍ¼ÌÍºÌÊ¾ÏÎ·ÎÌ»ÏÌºÍÎ»ÎÊ¼ÏÌ¹ÎÌ»ÏÏºÍÊ¸ÎÉ½ÎÎºÎËºÎÌ·ÎÊºÌÉºÎÈ¸ÌÊ»ÍÌ»ÍË¸ÍÈ¹ËÌ¸ÌÊ·ÎÊ¸ÌÌ¸ÌÌ·ÊÊ»ÌÈºÈË·ÎÎ¹ÊÌ½ÌÊ¸ÌË¸ÌÉ½ÍÌ¼ÍË·ÌÈ¸ÉÌ»ËË·ËÈ»ÌÌºÊÊ¸ÌË»ËÊ¸ÊËºÎÉ¸ËÈ¹ÊË¸ÍÊ¹ÌÍ·ÎÊ¸ÊÊ»ÌÌ»ÌÈ»ÌÌ·ÌÈ¹ËÈ¹ËÌ·ÊÊ¸ÈÈ·ÌÊ·ÊÈ¸ËÉ¸ÊÉµËÉ¶ÉÈ¸ÊÇµÊÇ·ÉÆ¸ÈÇ³ÌÇ¹ÈÈ·ÊÈ´ÈÆ·ÆÄ¶ÉÈ³ÆÆµÈÃ»ÊÈ²ÊÃ³ÉÆ³ÇÈºÈÇ²ÆÄ·ÇÉ³ÇÄ³ÈÃ³ÆÆ²ÈÃ°ÈÄ³ÇÇ³ÈÈ³ÆÄ³ÃÄ´ÇÃ²ÇÂ³ÅÅ³ÄÁ°ÄÃµÄÄ¯ÇÁ³ÃÀ³ÆÂ³ÅÃ²ÃÁ³ÆÃ´ÄÁ°ÅÁ®ÄÀ°ÄÄ°Ã¾±Ä¼¬ÃÃ±ÇÁ°Ã¾±ÆÂ±Å¾¯Â½¯ÃÀ­Ã¼¨Á¼®À¾®ÁÃªÃº¯Á¾®ÁÁ­Ã¿­À¾­À¾¯Â¼®Ã½®ÅÁ¬Â¿¬¾»­Ä»®Ã½©Áº¬¿À­À¾ªÃ»°À»­Ã¿­¿¼¬¿º®Á¿®¾¿®Â½«Á»«¾»­¿¼ªÁ»¥¾¶®»¼¬½¾®½ºª¿½­¾¾¬¾»®¾»¬»»¬À¼©¾½«½º©½»«¿»¬¾»«¾»¬¾¸©»¸©¾»©¼»¬¾»«¿»¤º»ª»¸§À»¯¾º¬¾º¬À¼§¿¸«¼¹ª»»¥¾¸¬¼º«¼¸«½µª»¹¬»º©»·©»·©½º§»¶ª·µ§¹·¬··§ºµ¦º·£º¸©»´¥¹¶£»ºª»´¦¸·¬¸¶¨¹³¥¹·¨¹·¦·µ§º¶¨·¸¦¹µ¤¹·§¶²¤·¶¦¸³©·´£¸°¤µ²£¶µ¨µ·¦·²£´·§·±©¹¶ª¼¹¨¾·©¼´ª½ºªÀ¸«½¸¬¾º¬¿·ª¿¶«¾¹¬¿·©¾¹²¾¸¬Ã·¨¼·¬¾¶­À¼ª¾·­¼¸¬¼¼¬Â¸°¿¸¬Â»«Á¸ª¿»¬Ã¹¬¿»¬¾»­Á¼¯Á»®Â¹¬Á¹®Ã¾®Á¼¬¿»¯Â¾¬Å»¬À½®À¼¯Ã¼®Ã¼¯Ä¼¯Ãº®Å½±ÃÁ°Å½±Ä»¬Á¼­É¼®Ã»±Â¼²ÅÀ³ÆÀµÃÀ®ÃÀ°Å¼³Â¾°È¾­ÆÀ°Ã¿³Å¿¬Æ»³ÃÀ°ÇÁ³ÆÁ³ÂÃ±ÆÁ°ÆÂ²ÈÁ±Æ¾³ÇÀ³ÈÁ´ÈÃ²ÆÃ³ÆÁ³ÈÂµÇÁ³ÇÂ³ÆÁ³ËÂ²ÉÃ³ÊÂ³ÊÃ´ÉÂ³ÅÁ¶ÈÀ²ÇÁ¶ÈÄ´ÇÁ±ÉÁµÈÁ¶ÊÄ³ÈÂ¶ÈÂµÈÅ°ÊÅ¶ÊÅ¶ÉÅµÊÁ·ÊÂ¶ÉÅ³Ê¿±ÇÃµÈÆ³ÌÂ³ËÅ³ÊÆ·ÌÃ´ÊÄ·ÌÅ¶ÍÆ´ËÆ·ËÄ¶ÎÇºÊÅµËÅµÊÆ·ÍÃ·ÊÃ·ÍÈµÌÅ·ÌÈ¹ÌÇ¸ÊÆ·ÌÇ¹ÎÆ·ÊÇ·ÐÆ·ÌÊºÌÅ·ÍÂ¶ÊÆ·ÍÆ·ÏÇºÌÈ·ÌÈ¶ÍÈ¸ËÇ¶ÌÈ¹ÊÈ»ÌÉ¹ÌÆµËÆ¶ÌÊ¹ÍÊ·ÐÇ·ÍÄ¶ÌÊ¶ÌÉ¼ÌÄºÍÊ»ÎÆ»ÎÊ»ÏÈ»ÐÊ»ÑÇ¼ÍÊ½ÑÈ»ÎÈ»ÌÊ½ÒÈ·ÐÈ·ÐÆ»ÐË·ÎÈ»ÌÉ¹ÎÊ»ÎÇºÎÈ»ÐÊ»ÏÈ¼ÑÊ»ÎÊ»ÎÊ»ÎÈ»ÎÌ»ÐË»ÍÉ¹ÍÈ¹ÑÊ¹ÐÊºÐÌ½ÐÈ»ÌÊ»ÑÌ¾ÒÊ¾ÓÊ½ÐÊºÑÌ½ÐÌ¸ÒË»ÐÍ»ÐÌ¼ÏÊ¾ÎÊ½ÒÌ¿ÓÍ½ÓÍ¾ÕÎ½ÐÉ¾ÓÌ½ÒÉ¼ÎÊ¾ÒÍ½ÑÌ½ÒÌ½ÎÊ½ÐËºÐË¾ÐÌ¼ÒÊ¾ÏÊºÎÎ½ÏÌ¼ÓÈ½ÐÍ¾ÓËÀÓÍÀÒÌÀÒÐ»ÒÌ½ÐÊ¿ÒÊ¹ÒÌ»ÒÌÁÓÌ¼ÒÏ»ÒÐ»ÔÎ½ÔÍºÒÈÁÑÐ¾ÒÎ½ÒÎ¾ÐÎ½ÓÐÀÓÐ¾ÐË¼ÐÍÀÓÌ¾ÑÎÀÓÑ¾ÓÎ¿ÓÑÀÓÐ½ÓÍ¼ÏÍ»ÒÒÁÒÐÁÓÏ¿ÓÎÁÓÐ¿ÓÐ½ÑÌ¾ÓÌ¿ÒÎ¾ÕÓ¿ÔÌ¿ÒÎ¿ÓÎ¾ÓÑ¿ÕÏ¼ÒÌ½ÒÌ¾ÒÌ¹ÐÍ¾ÒÍ¼ÐÐ¾ÑÎÂÓÑ¾ÓÌ»ÑÍ¾ÓÒ¿ÒÌ½ÐÎ¼ÒÎ¼ÒÑ¿ÓÎ¿ÒÐÀÒÑ¾ÒÎ¿ÓÐÁÒÐ¾ÔÎÂÒÑÁÕÐ»ÒÏ¾ÕÏÀÓÏ¿ÓÎ¾ÑÎ½ÓÐÀÕÐÀÕÐ¾ÑÍ¾ÓÐÀÔÏÃÓÐ¾ÕÍ¾ÓÎÂÕÒ¾ÒÐ¾ÒÏ¿ÓÐ¾ÓÎ¾ÐÌ¼ÐÒ¿ÐÎ¾ÑÇ»ÍË»ÌÌºÎÉ¸ÈÍÀÈË½ËÊºÉÈ»ÈÊ½ÉË»ÃÈ¼ÃÊ¹ÆÄºÃÃ³ÀÂ¸¾Ç´¿½°»¸ª»º®¹µªµ´¬³°¥º³¥¸Á³»Ã³ÀÅ¶ÁÈ´ÅÊ·ÇÈµÆÆ´Ä¿µÂ¾¶ÁÂ·ÃÀ´ÁÄ´½À°»¹¯»±®µ³®´·¬¸¹¬··¤·°¥¸»­ÀÄ¸ÁÆ·ÃÀ¶ÃÂ³¿Á´ÂÂ·ÅÈ¸ÈÉ»ÌÆ·ËÉ¼ÈÌ½ÊÐ¼ÐÐÂÍÐ¾ÒÐÃÒÎ¾ÏÍ¿ÎÎ¾ÒÌ½ÌÍ¼ÒÏ¿ÒÍ¾ÐÌ¼ÒÐ¾ÒÐ½ÒÍÁÒÐ¼ÒÌ¾ÒÐÀÑÎ¼ÐÉ»ÎÉ¼ÒÐ¼ÐÎ¾ÑÌ¼ÒÎÁÐÐ¼ÓÌ¾ÐËÀÒÒÀÓÎÂÓÏ¾ÑÎ¾ÏÍÀÒÍÀÓÑÁÐÎ½ÐÑ»ÓÑÁÕÍÁÑÌÀÓÎ¿ÒÌ¿ÓË¾ÒÒÀÓÌ¾ÒÌÁÐÏ¾ÒÌ¿ÒÐÀÓÐÃÒÐ¿ÕÍ»ÒÏ¿ÑÎ¿ÐÒ¾ÒÐÁÑÍ¼ÒÑÂÓÎÁÒÎÁÑÑÃÑÎÃÒÎÀÎÌ¼ÎÎ¿ÑÎÁÕÌ¼ÐÊ»ÐÌ½ÒÎÁÒÍ¾ÐÌ¿ÑÌ½ÐÍÁÑÎ¿ÐÊ½ÏÌ¾ÐÎ½ÑÊ¼ÐÉ¼ÏÐ¾ÒÏ¿ÒÊ¼ÑÍÂÑÑ½ÐÍÀÑÍ¾ÒÌÁÒÏ¾ÑÌ¾ÎÌ½ÐÌ¾ÐÎ»ÐÐ¼ÐÍ½ÐÌÁÑÍ¼ÏË¾ÐË¼ÍË½ÐÍ½ÐÎÀÌÏÂÒÊ¾ÔÍ¾ÎÌÁÐÎ¿ÐÌ»ÏË¿ÌÌ¿ÎÌ¾ÐÊ»ÌÎ¼ÐÊÀÎÌ¾ÍÊ½ÐÌ¿ÏÊ»ÐÊ»ÊÊ»ÎÊ»ÌÊ¼ÑÇºÌÇ¾ÊÉ»ËÊ»ÌÆ»ÊÈºÌÈ¸ËÇºÌÇ¹ÌÆ¸ÍÈ»ËÈ¹ÌÈ¹ËÃ·ËÈºÍÆ»ËÄºÌÈ¹ÌÇ»ËÆ¸ÌÅ»ÍÊºÌÇ¸ÊÆºËÈ¹ÌÄºÈÅºÉÆ¸ËÅ¹ÈÅµÊÆ·ÌÄ»ÈÆ´ÇÃ·ÈÆ¹ÇÅ¶ÈÃ·ÇÃ°ÇÅµÈÃ´ÉÆµÆÃ·ÈÀ³ÈÁµÇÃ´ÆÂ³ÈÀ·ËÄµÈ¿³ÇÀ´ÈÁ³ÈÁ³ÅÀ²Ç¿²ÈÁ³Å¿³ÆÁ®Æ¿³ÄÁµÅÁ´ÆÁ±ÃÀ³ÄÂ³ÆÀ°Æ¾³Æ¾²Å¿±Å¼²ÃÁ¯Ã¿°Å¿³Æ¾²Å¿°Ä¿±Ã¿³Æ¿´Å¾³Ä¾³Ä¿±Â»°Ã½°Ã»¬Ä»³Ã¾®Á¼´Ã»®Á¾³Ã¼°Ä»³Â¾´Ã¿³Á¼³Ã¾²Á¾²Å»­Ã½®Á¼®Â»³Â¼±Â¾¯Á»±Á¸¯Ã¿¬Ãº¯¿½´Ã¾²Á¿±¾¼³Ä½°Áº¬Á¹±¾½¯Á»¬Â¾³Â¾³Á¹¯Á»°¾»±Àº®Â¸®¾¸­¿¹©À»¯Â»­¾·¯¾»¬¼¸¬¼»¬¿µª¿·ªº·¬À»­À·¬¾¹­½¸ªÀ¸­¼·ªÀº­½·¬»¶¨»µ«¾µª½¹¬»³¨½µ¦½³®¹µ¬»·«¹¶©¹·ª¸¶©¿µ«»¶ª½°£³³¤¸µ¤¸º¨»³¥·²§·µ¢¹¸¤º¸¨º¶§·¸¤º¸ª··§º·¥»´¥·»§¼·¨»·¥¸º¥¹·¤¾·§·¸¥»·§½·¤¸·©½¸§¿º¦½º«¾·£½·¦»ºª¾¼«¾¸¦½»¨¾¼¬¾½¨½¹ª¾»©Á·©¿¼ªÀ¾­Á»¬¾»¬¾¼«½½¬À»ª»»¬À¾¨¾½ª»½ªÁ¹©½¼®¾¾«Á¾¬Á¾«Á¾¬Á¾ªÀ½«¿¾¬ÂÁ¬ÅÀ¬Ã¼«¾¿¯¿¼¬Ã¼®Ã¾¬Ã¾­¿¾°Á¿®Ã½¬Ä¾¬ÁÀ¬ÃÃ­ÄÁ­ÄÀ¬ÂÂªÄ¿®Ã¾®Ã¾«ÂÁ³Ã¿®Ã¾¯ÄÁ®Ã¾­Ã¾®ÆÁ­Á½­ÅÁ®ÅÀ³Æ½¯ÂÁ¯ÃÀ³ÃÀ³ÃÀ¯È¿®ÄÁ°ÄÀ¯ÆÀ­ÅÀ²ÃÃ¯ÆÃ¬ÄÁ°ÄÅ²ÊÂ¯ÄÁ²ÄÁ°ÆÀ¯ÄÃ²ÆÂ®ÇÁ³ÉÁ²ÄÁ²ÆÂ³ÇÃ²ÉÃ´ÆÃ¯ÆÂ±ÆÁ±ÄÂ³ÆÄ¶ÈÃ³ÆÅ³ÊÅ°ÉÃµÉÈ¶ÈÄ·ÈÃ³ÉÆ³ÆÈ³ÈÆ³ÇÃ³ÈÆ´ÈÆ²ÈÂ³ÇÆ±ÊÆ²ÄÆ³ÆÅ³ËÅ²ÊÄ²ÈÆ²ÇÃ±ÇÄ³ÇÈ·ÊÆ¶ÉÆ´ÆÆ´ÆÇ³ÈÈ´ÈÆ·ÊÊ³ËÈ³ÉÇ·ÊÇµÊÆµËÆµÌÇ¶ÍÈ·ÉÆ·ÉÉµÌÅµÊÇµÊÉ³ÌÈ´ÈÈ²ÈÆ´ÊÊ³ÉÄ·ÌÅ³ÌÈµÈÇµÊÅ·ÍÈ·ÊÇ±ÊÈ¹ÊÆ´ÍÇµÊÈ¸ÎÈ¶ÊÊ·ËÈ¶ËÈ¹ÌÇ³ËÈ¹ÌÈ·ÌÇ·ÎÊµÊÌºÌÉ»ËÊ¶ÌÌ¹ÏÈ´ÌÌ·ÌÌµÌÈµÉÈ¸ÍÊ¶ÌÌ¸ÌÊºÐË·ÌÉ¸ÏÈ´ÊÉ»ËÉ¶ÏÊ¹ÌÉºËÆ·ÊÊ·ÊÊ¹ÊÈ´ÌÊµËÉ¸ÌÊ¶ÌÉ´ËÊ»ÊÌ³ÎÊ·ËÉ·ÌÌ»ÏÌ¸ÏÉ¶ÌÍ¸ÏÊ¸ÎÌ¹ÐÊ¸ÎÊ·ÐÌ»ÍÌ¹ÊÌ¸ÒÌ¸ÍÉ·ÎÊ¸ÍÌºÎÈ·ÎË»ÏÎ¸ÐÍ½ÎÌ¹ÎËºËÊ¹ËÌ»ÎÌ¸ÏËºÎÐ¼ÐÐ»ÎËºÍÊºÐÐ»ÒÍ¹ÏÍ»ÐÌ¹ÐÎ»ÎÏ¾ÍÎ¼ÐÌºÎÐºÐÌºÐÌ·ÍÍ·ÌÎ¼ÏÏºÎÌ»ÌË¸ÎÎ¸ÏÊ»ÎÎ»ÎÊ·ÌÐ½ÎÌ·ÑÌ¹ÐË»ÎÑÀÎÎ»ÏÑ»ÏÍ»ÏÎ·ÎÍ½ÏÌ»ÏÏ¼ÒÌ»ÌÎ¾ÏÌ¸ÍÍ¹ÎÏ½ÐÍ¸ÏÍ½ÏÊ½ÐÑ»ÒÎ½ÏÌ¸ÐÎ¸ÌÑ·ÎÍºÌÎ½ÌÍ¹ËÐ»ÏÎ¸ÎÍ¸ÒÌ»ÎÎ½ÍÏ»ÐÌ¹ÎÊ½ÏÎ·ÎÌ»ÎÌ»ÌÎ»ÏÎºÎÍ¼ÍÊ·ÉÈ¶ÈÉµÆÈµÃÈ·ÀÆµ¾»«º²¦·²«°¸¬³º¦µ³©±©©¡©¨¦ª «¥¨­¡¡¦ª¬¯§­¹°³¼°¸Á³·¿²»Ã³·Ã«·²±¥§«¦£§£®£¶£©¹§±¹¨·² µ¬°°¥³µ§¶Á¬ºÀ®¼ÃµÀÃ²ÃÅ¶ÄÈ¸ÈÈµÆÌ·ÈÌ»ÌÍ»ÊÉ¸ÇÊºÌÌºÌÎ¶ËËºÎÍ½ÌËºÌÎ½ÊÌ»ÌÌºÌÏ»ËÊ¹ÌË¸ÍÈºÎÅ·ÊË·ÊÌ¹ÌÎ»ÏÌ¼ÌÌ¸ÌÌ·ÐÌ¸ÐÊºÎÎ½ÎÊ¸ÏÌ»ÎÌ¹ÐÍ·ÍÊ»ÊÎ»ÐÌ¹ÊÌ¸ÎÌ½ÎÌ»ÐÎ»ÏÊ¸ÎÍ¼ÎÍ¾ÓÊ»ÏÏ»ÍË»ÍÍ½ÍÐ»ÏÎ»ÍÎ½ÌÌ»ÐÐ¼ÎÊºÎÎ»ÍÎ¼ÎËºÌÏºÎÎ½ÍË¾ÐÒ¹ÐÍ»ÌÊ¹ÍÎ¾ÎÍ¹ËÎ¼ÎÉ»ÎÌ¹ÍÌ»ÏÊ»ÎÉ¼ÌË·ÎËºÎÌ¼ÎÊ»ÌÊ·ÈÊ»ÌÈ»ËÊ»ÊÌ»ÌË»ÌË»ÌÌ·ÍÍ»ÎÊ½ÍÏºÌÊ»ÌÆ¶ÌÈ¾ÌË¸ËËºËÍ»ÍÊ»ËË»ÌÉ¹ÊÌ»ÍË·ÌÊ½ÌÊ·ÌÈºÌÊ»ËÌ·ÊÉ·ÌÉ»ÌÊ¸ÌÇ¸ÌÊºÈÈ¾ÌÊ»ËÇºÌÊ»ÌË¸ÎÊ·ÌÉ¹ÊÉºÌÊ¼ÌÇºÇÈ·ÌÈºËÊ»ËÈ·ÍÈ°ÈÇ¶ÈÉ»ÊÈ¶ÊÆ·ÈÅ¶ÊÇ·ÊÆ¶ÉÉµÇÆ·ËÆ¶ÈÇ·ÈÆ´ÉÆµÆÇ¸ËÆµÇÇ¸ÆÅµÇÊ·ÈÃ·ÅÃ³ÈÇµÉÅ·ÆÈ·ÈÆ¸ÉÅµÈÃ³ÆÃ³ÉÁ²ÆÃ³ÆÄ³ÇÆ¯ÇÃ³ÄÅ¶ÄÃ¶ÈÂµÃÂ°ÆÂ­ÄÃ²ÆÁ²ÄÀ°ÄÁ³ÆÀ±ÇÂ°ÅÃ­Á¾³ÃÃ®Ã¾¯ÀÂ²Â¿¬ÇÀ®Ä¿³ÃÁ²Ä¾¯ÃÀ²Ã¾°Á½¬Á¼®Ã¾¬Å½¬À¾°ÂÁ®Á¼­Ã½®Á¾®¾¾«Áº®¾½°À¾«Â¼«½½¬Á¿¬À¼«¿¾¬¾½®Á»®¿»­À¼®À½¬¿½®À¿­À»«¾¼®¾¾ªÀ»­¾¼¯¾½­Ã»¬¾»¬¾½¬Á¿¬Àº®½»¬À»¬Àº­¾»¯¾»­¾»¬À»±À¼«¾»«»¼«¼»«¾º¬½º«¾º©¼½¬¾º®»º¬¼º¬¿º®½»®¾»¦¾¹®º»­¼ºª½·¬»¸¬»·ª»·ª¸·ª¾¹¦¾»ª¼¶ª¹µ©»·§½¹¬»»¬»¶¦¸´¬··§¹¸§»µ§¸·¤º·©¸µ§¹¸¨»·©··§¹µ¤¸µ¥¸¸§·µ§·µ£º²¦·´§¶¶§º´¦·³£·µ¦¹·¥·²©´´¢¶³¤·³©µ®«¹¶ªÀº®¿·©¾¸©»»¯¿¹¬Ã¸«¼·¬¿·®¾¸«¾·¬½»ª¿·©Á·ª¿º©À·«¿·¬½»«Á¸¬¾¸­¿»ªÁº®Á·¬Â»«¿º­Ã»¬¿º¯Á¸¯Â»©À»¬À»¯Ãº®À»®Á¿¬Ã¼­Ã¸°Ã¼°Â»³Å¾®Ä¾¯Ã½¯Â¼±Á»¯Á¾¯Å¼±Ã»±Æ¾¬Å½®Á½¯Æ¾°Æ¾¯Ã½°ÄÀ®Æ¾³Ç¾¯Ç¿®ÃÁ¯É¿³ÇÀ°Æ¾°Æ¾±ÈÀ´ÃÀ¯Æ¾°Ç¾³ÆÃ¯È½³Ä¿±ÆÁ´ÈÂ´È¿±ÆÁ³ÆÃ³ÇÁ´ÈÂ°ÇÂ·ÈÅ±ÈÂ¶ÉÀ³ÆÁ²ÈÁ³ÈÁ³ÈÁ³ÇÃ¯ÊÁµÈÀ³ËÃ³ÇÁ´ÊÁ³ÉÂ³ÈÅ³ÌÂ·ÊÃ³ÈÁ´ÇÂ³ÈÃ³ÉÄ³ÈÁµÈÅµÈÅ³ÊÁ¶ÆÆ·ÌÁµÌÂµÈÅ¹ÌÁ´ÈÂ¶ËÅµËÃµÊÅ¶ÌÆ³ËÄ·ÊÆ¹ËÃ¹ÊÃ³ÉÄ¶ÌÆµÉÂµÍÅ¶ÌÆ¸ÍÄ·ÌÈ·ÌÆ¶ÌÆ·ÌÆ´ÌÅ¶ÌÆºËÇ¹ÌÇ·ËÆ¹ÐÉ¶ËÉ¹ÌÈ¶ÍÈ·ÌÈ´ÌÆ·ËÆ·ÌÇ¶ÎÃ¹ËÈ´ÌÈ¹ÎÇ·ÌÈºÌÄ¹ÌÇºËÈ¼ÍÈ»ÐÇ¸ÌÉ¼ÎÊ»ÎÈ¹ÌÈ»ÐÌ·ÐÈ»ÐË¹ËÊºÏÈ»ÐÈ¹ÎÊ¼ÏÊ»ÐËºÐÊ»ÍÇ·ÊËºÎÈ¼ÎÊ»ÍÆ»ÎË¹ÐÌºÑÅ»ÎÈ¸ÎÈºÐÌ»ÑÌ¼ÓÉ·ÎË·ÐÌÀÐÉ»ÎÊ¼ÐÈ·ÐÌ¿ÒÊ½ÒÉ¼ÐÊ¼ÐÊºÒÌ¾ÓÌ»ÐÊ»ÒÌ»ÐÌ¼ÑÊºÏÈ»ÎÌ»ÐÍ¿ÓË¾ÐÌ¼ÒÏ¾ÒÎ¾ÑÌ¼ÓÈ»ÏË¾ÒÌ¼ÒÊ»ÒÌ»ÐÉ¿ÏÌ½ÏÉ»ÐÊ»ÑÌ¹ÎÌ½ÐËºÎÊ»ÐË½ÒÍ¼ÎÍ¾ÒË¼ÐÉÁÐÍÁÐÊ»ÓÊ¼ÒÑ½ÓÌ»ÒË¼ÓÌ¿ÒÎ»ÓÎ¿ÐÍÁÒÎ½ÓÍ¾ÒÌ¾ÒÎ»ÒÌÁÑÎ½ÒÑ¾ÕË¿ÐÊÀÓÒ»ÒË¿ÐË¸ÎÌ½ÖÎÃÒËÀÕÏÀÕÍÁÓÐÁÒÐÁÕÍÁÖÎÁÓÑ¾ÖÐÁÕÎÂÑÑÂÕÒ½×Î½ÒÎ¾ÖÎÁÓÐ¼ÒÎ»ÓÐÁÕÊ¿ÓÐÁÕÒÀÕÍ»ÓÌ¿ÔÍ¾ÔÏÁÓÍ»ÓÍ¾ÒÏ¾ÒÒ¿ÕÎÁÖÎ½ÖÐ¿ÒÑÁÖÌ»ÒÎÀÓÎÀÒÐÁÓÌ½ÓÎÀÕÎÂÕÏ½ÒÐÁÕÐ¾ÓÎÀÓÐÀÓÑ½ÕÏ¿ÓÐ¾ÕÏ¿ÒÌ»ÓÎ¿ÕÑ¿ÒÒÂÖÎÀÒÓÁÒÒ¾ÕÐÂÕÍ¿ÒÏ¾ÕÏ¼ÑÎÃÐÑ¾ÐË¿ÍÌ½ÎÐ»ÏÊ½ÎÌÀËÈ·ÉÆ¹ÃÂº½¾¯¼·¬·¬²¢§©¥§©rxtzx{u|wxwtkwt|rw ¥§¬¦¤«¨¥«¡© www|~wqkql|{¡¤¤§ ¨§¦¡¨¥¬´©¯¹«·½¬½Â³¿Ç¸ÃÊ¸ÃÄ¸ÆÅ¸ÇÊ½ÊË¿ËÈ»ËÆ»ÌË½ÌÌ¼ÌÏ¾ÎÏ»ÎÊ¿ËÌ¾ÎÇ¾ÎÌ¼ÎË¼ËÎ»ÐÊ½ÎÍºÒËÀÐÎ¾ÒËÁÐÏÁÓÎ½ÒÌ¾ÐÎ¾ÓÌ¾ÑÐ¿ÐÒ½ÒÏ¾ÔÎ¼ÑÎÁÒÍ¿ÔÎ¾ÐÐ¿ÒÐ¿ÑÎÀÕÏÁÓÎ¾ÓÐ¿ÔÎÂÕÓÁÒÎ¾ÐÌÀÑÐ¾ÓÌÁÑÌÂÒÐÃÕÏÁÓÍÀÒÐ¾ÓÎ¾ÒÎÀÒÏ¿ÒÍ¿ÒÌÁÓÒÁÕÐÁÒÌÂÒÎ¾ÕÍ½ÐÐÂÐÌ¿ÒÏÀÓÌÀÒÌ¾ÕÏ¼ÒÌ¾ÒÐÁÒÎÁÑÌ»ÑËÁÑÎ¾ÒÏÀÔÌ¾ÐÍÁÒÎÁÐÌ¿ÐÎÀÓÊ¼ÐÎ¼ÏÌ¿ÒÍ¾ÒËÁÌÎ¼ÐÎ¿ÎÊ½ÓÎ¾ÐÍ¿ÒÎÁÐÊ¿ÒÎ»ÑÍ»ÐÌ¼ÕÍÀÍÌ¼ÑÌ¿ÍÍ½ÐÊ»ÏÌ½ÑË½ÍÈ¾ÐÉ¾ÏË¼ÎÌ½ÎÌ¼ÏÊ½ÎÊ»ÏÌ¾ÍÌÀÏÎ½ÑÍ¾ÐÌ¾ÐÈ¾ÎË¼ÒË½ÍÊ½ÍÌºÐÈ¾ÍÊ»ÐË»ÍÉ¾ÌÊ¼ÎÌ¹ÍÇºÍÇ½ÌÈ»ÏÆ¼ÌÇ»ÌÌºËÈ½ÊÆ»ÊÆ¹ÌÈ½ÌÈ»ÍÆ¹ËÈ¹ËÇ¼ÌÈ»ÊÅ»ÌÆ¹ÍÆ¹ËÈºÈÇ¹ËÇ»ÌÅºÌÇ¸ÌÇ·ÉÇ·ÊÅ¹ÊÃ·ÌÃ´ÈÃ·ÊÅ·ÉÆ¶ÊÁ·ÈÃ´ÇÃ·ÈÅ¶ËÁ¶ÈÃ¶ÉÅ·ËÂµÊÀ³ÊÂ·ÇÃ¹ÆÁ´ÉÁµÇÃ·ÈÂµÇÁ´ÈÂµÅÁ±ÊÀ²ÆÁµÈÀ°É¾³Æ¾³Ç¿®Æ¿³ÆÁ³ÆÁ³ÆÀ®ÆÀ°ÈÁ³ÅÁ²ÄÀ²Ã¿³ÄÀ´Å¾°Æ¿³Æ¾­Ã¼²Æ¿µÅÀ¯Æ¾¯Ä¾µÂÂ³Ã¼´Ã½³Æ¾°Ã¾°Å»³Ã¾³Á¼³Ã¿³Ã¾±Æ»°Ã½³Å½³Å¾²Ã¿®Å¾°Ä¼°Ä»±Ã¾±Á¿±Æ¾³Ä½²Å½°¿¼³Á¼°Â»®Ã·³Ã¾¯Á¼¬Á¹¬Áº¯Âº²Á»­Æ·¯À½²Á»¬Âº³Á¹¯Á·­Á»°Àº°¿º¬Ã·¬¼¼°Á¼¬Á¹®¿º±»º®¿¸®Áº®¼»­¾º¬¾´¬»º¯¾¸®¿µ®¼º­½·¬Á·¬¼¸¬¾¶¬»¶­¾µ¬¿¶«¾¶«¾·¬¼´ª¼µ­»·ª¼´©½´¬»µ§»º¬¼¶©»³§»´ª¼µ«¾³¬·±¥±´£·´¦ºµ§»¹©·¶¤»·©ºµ¨»¸§¸¶¨º·©»µ©»¹§»µ¥ºµ¥¸·¦»º§º·¥»¸©º·¦»·§»¶¦»¸§»¸¨½·¬º·©½·§º·«»º¥½µ¥¾¹«»·§»»§»»«»·±¿»ªÀº«¾¸¨»¹¬»¸©Áº«¾»¬¿¹ª¾»¬À½«¿»¬¿¸¬½º§»»©¿»ªÀ¸¯Â»©À»©Á½¬¼¾«Á¾¬ÂÀ¨Ã¿ªÃ»ªÂ¿®Â½®Á½ªÀ¾¬ÁÁ¬ÄÀ¬À¾®Ã½«Á¾­Ã¾°Á¿±Á¿­¿½®ÃÁ¬ÆÁ°ÂÀ­ÂÃ®ÅÀ±ÃÀ­ÁÁ­ÆÃ®Ä»°Ä¾­À¿®Ç¾­ÃÁ¯ÃÁ¬Ã¾°Â¾¯ÄÁ°Ä¾«ÆÂ°Ã¿¯ÃÀ²Ã¾®ÃÁ¬ÃÃ®ÃÁ¯ÄÃ¯ÆÁ¯ÂÁ®ÃÂ³ÊÂ®ÆÁ³ÃÃ±ÆÂ±ÆÁ²ÃÀ³ÄÃ¯ÆÁ²ÄÃ³ÅÁ³ÄÁ²ÆÊ²ÈÅ®ÄÃ­ÇÁ²ÇÄ·ÈÄ³ÆÁµÆÅ³ÆÄ¯ÈÈ²ÈÅ³ÅÄ´ÈÃµÇÆ³ÆÃ¶ÆÃ´ÇÅ³ÇÄ³ÈÅ·ÊÇ¶ÈÄ³ÈÃ²ÆÄ¶ÈÆ´ÇÅ¯ÈÄ¶ÆÅ´ÇÆ³ÈÆ¹ÌÄ³ÈÄ³ÇÆ´ÊÈ¶ÆÆ·ÈÇµÈÆ·ÌÈ¸ËÅ·ÊÈ²ËÈ²ÊÅ¶ÊÇ³ÈÆ¸ÊÈµÈÈ³ÈÄµÌÈ·ÇÈ·ËÉ³ËÈ²ÈÆ¶ËÈ²ÉÇ·ÊÄ·ÊÈ³ÊÉµÌÇ»ÊÉ³ÌÈµËÉ¹ÊÈ¶ËÈ·ÌÈºÈÉ·ÊÇµÊÈºÊÊ·ÊÊ·ÊÈ¹ÊÈµÈÈ¸ÊË¹ËÊ¹ÎÌ»ÌÈ»ÎÌ·ÌÊ·ÍÎ¹ÌÈºÍÌ·ÌÊ·ÌË»ÌÊ»ÌÊ»ÌË¹ÌÈ¼ÍÊ¸ÌË¼ÊÊ¹ÎÈ·ÊÊ·ËÈ»ÌÊ¶ÌÆµÊÈ·ÎË·ËÊ·ÊÈ·ÍÊ·ÍÊ¸ËÈºÌÈ´ÊÊ¸ÌË»ÊË¸ÌÊ·ÊÊºÍËºÏÌ¶ËÈ»ÌÊ·ÎÌºÏË·ÍÌ»ÌÎºÐÉ»ÎÊºËÉ·ÎËºÎÎºÏÌ¹ÏÌµÌÌ¸ÏË¶ÎÊ¾ÍÌ¸ÑÌ¶ÏÍ¹ÎÌ»ÌÎ»ÐÎºÍÉºÍË¸ÎÌºÏËºÏÎ¼ÑÊ»ÑÌ»ÐÎ¹ÌÐÁÎÌ»ÎÌ¸ÎÍ¼ÓÊ¹ÍÏ¼ÏÌ¸ÎÌ¾ÍÍ»ÎÎ¹ÍÍ½ÏË»ÎÌ¼ÎÊºÎÎ»ÎÎ»ÎË¼ÍÌ¹ÐÌ¼ÏÍ»ÊÌ½ÎÐ¸ÑÎ¹ÎÎ¸ÎÎ¸ÏÌ»ÎÎ¼ÌÌºÒÎ¼ÎÊ¹ÍÌ¸ÏÌ¼ÏÍ½ÑÎ»ÐÌºÎÎ¾ÐÐ¾ÐÍ»ÎÎºÏÎ½ÐÏ¾ÎÏºËÎ½ÐÌ»ÎÊ»ÍÏ½ÐÎ¼ÐÎ½ÌÑ¾ÎÉºÌÇ·ÈÉ¸ÅÌ·ÈÊµÆÆ·ÅÊ¸ÆÊµ¾Æ´»·¬·º¨³±­¡wztw~wwlzfo]|k]x`YwfSw]SrgSwkYwl`xiYxfUtl[tl_xniurlzof~uitn~roz{qwgrgtizo]|f_wbYu`SzdStg]oi[zn`wtfzzlw~~¥¤³¦¬µ«µ½­µ·¬·½«·Á³»À¯»Ã´ÀÈ·ÄÈµÄÇ³ÆÇ·ÈÎµÆÅºÃÀ®Á¸«¾¾¬ÁÁ°ÈÊ·ÄÇ³ÊÌ½ÌÏ½ÎÌ·ÍÎ¹ÌÌ¼ÌÊ¹ÎÌºÌÊ»ÌÎ¹ÎÍºÌÌ½ÎÌºÌÑ»ÐË¹ÍË»ÌË»ËÎ½ÎÎ»ÏÏ¾ÐÌºÌÏ¸ÐÎ¹ÊÍ»ÐÎ¾ÎÏ»ÎÌ¹ÎÉºÎÐ¾ÐÊ»ÌÈ½ÎÑ»ÎÌ¹ÍÍ¼ÌÌ¾ÌÌ»ÌË½ÌÌ¾ÐÌ»ÌË»ÌÊºÌÏ»ÏÐ½ÐÎ¼ÌÌ¾ÌÌ»ÌÎ½ÏÌ¸ÎËºÌÎ¹ÏÌºÌÎºÌÍ»ÌÌ¼ÌÎ¹ÎÌ»ÍÌ¸ÊÎ»ÊÊ¼ÌÊºÍÈ¹ÈÉ½ÎË»ÊË»ËÊºÊÌ¼ÌÊ·ËËµÊË¸ËË»ÊË½ÍÊ»ÌÊ·ÌÌºÊÊ¸ÊË¹ÌÊ¹ÈË»ÌÌ¼ÌÈ¹ÌÌ»ËÉ¹ËË·ÊÈ³ÌÇ¶ÉÊ»ÏÊºÊÊ»ÉÈºÌÊ¸ËÊ»ÌË¹ÊÉ¹ÎË»ÍË¼ÊÊ»ËË¸ËÊ½ÎË¸ÊÆ·ÉÉ¸ÊÇ¹ÈÈ¹ÈÈ·ÊÊ¹ËÈ¸ÊÈ·ÉÈ·ÉÆºÊÈ´ÊÉ¶ÊÇ¸ÈÆ¹ÈÈ·ÈÆµÇÈ·ÉÆµÉÈ·ÈÅ·ÉÇ¶ÇÄ¶ÈÅ·ÅÄ·ÆÃ¶ÆÅ³ÈÇ´ÇÃµÇÇ³ÆÅ³ÇÆ´ÆÄ·ÇÆµÈÃ³ÄÃ²ÈÄµÅÂµÆÄ³ÆÄ´ÆÄ±ÅÁ³ÃÅ²ÃÃ°ÆÁ³ÁÁ±ÃÂ±ÃÃ²ÅÀ³ÅÃ±ÄÃ³ÄÄ±ÃÀ¯ÁÁ·ÅÀ³ÁÃ³ÆÂ±Ã¿®ÂÃ¬ÃÁ°Ã¿°Á¼­¿¾¬À¾±Ä¿¯Á¼­Á¾±ÂÁ°Ã¿¯Ã¾°Á¿«Â¿­¾½°¾»¬Á½«Ã»­Á¿ªÁ¾«¾º¬¿¼­Á½®¿»«¼½®¿¾¯Á»°¼»¯¾¼«Ã¾«¾¾¬¾¾¬Á»®¾»®Á»®¿½©Ã½¬½¼²¾¼«¾»­¼½¬¾¼¬¾»«¾º°½¹«½»¯À¹¬¾»«½º¬½º­º»®¼»­½¹«»¼«½º¬»½¬½»¬¾»¬½·¬¾»©¾¸ªº»­¼·ª½·ª»¹¬¸»¬¼·­¾·«¸¹ª»¸¨»µ©¸¶«»µ«ºµ¬»¶«¼¸§»·©··©¸·¦¸¸¨º¸¨··§¸µ§¸¸«»µ¨¸º§º³¥¼¸¦»¸§¸¶§¶¸¤µµ¦·³¨¶µ§¸¶£·´¢·³§º³¤·³¦³³§¸´¥¶³¦¸°§·¹¬À¶§¼·¬Âº­½¶®¼¹¨½·©¾ºª¾º¬¾¹®¾¶ª¾·¬½¹¬¿¶¨¿¼¬À»¬¾¹®¿·«À¹®¿¸¬Â»­Ã·­Áº¨Á¸¯À»®Ã¹­Ã¸®À·©Á¼¬Á·²Â·¬¿»­Á¼¯Á¼°Âº¬Ã»²Á¼±Â¼­Ä¼®Ã¼²Á¹°Áº­Ã¿¬Â¸¬Â¿²Ã¼²Â¼­Ä¼¯Á»²Ç¿­Æ»±Ã»±ÅÀ²Ä¿¬Å¿³È½µÆÀ®Æ»¯Ã½³ÆÂ®Æ¾³Ã½³ÆÁ´ÆÁ³ÆÀ²ÆÀ°ÇÀ³Æ¿³Æ¿³ÈÁ³ÃÀ±ÈÃ³ÈÁ¶ÈÂ·ÉÂ±ÈÁµÆÁ´ÈÃ±ÈÂ³ÇÀ´ÆÁ¶ÇÁ³È¾±ÅÃ°ÈÅ²ÈÃ³ÊÁ³ÊÁµÈÃ³ËÂ·ÈÂ³ÇÀ³ÊÁ³ÇÂ³ÈÃ²ÆÁ³ÌÆ³ÊÃ³ÈÂ´ÈÃ¶ÊÆ·ÊÅ¸ÊÃ³ÊÄ³ÆÃ·ÊÂ¶ÉÅ·ÊÃµÌÄ·ÉÆ·ÊÅ¶ÉÆ¶ÈÆ³ÌÇ¸ÌÄ·ËÆ¶ÍÆ¹ËÆ¶ÎÈºËÅµÌÅ»ÌÆ·ÎÇ·ÉÅ¸ÊÇ·ÌÇ·ÍÃ·ÊÈ·ÍÃ¹ÌÆ»ÌÆ¶ÉÇ»ÍÈºÌÈ¹ÊÉ¸ÌÄ»ÊÈ»ÎÆ¹ÎÅ¹ÎÈºÌÈ½ÐÆºÎÈ¸ÎÆ¹ÍÊºÌÉ»ÐÈ¹ÎÊ»ÎÈ¹ÍË·ÏÉ¹ÐÈºÌÊ»ÐÈºÍÇµÍÈ¹ÌÊ¹ÌÆºÐÊ¸ÏÆ»ÏÅ»ÎÊ½ÏÌ¹ÍÈ¼ÑÆ»ÐÇ¸ÍÊ¸ÎÈºÌÊ¹ÐÊºÎÆ·ÍÉºÐÌ¹ÏÇ¼ÐÈ»ÒÊ·ÌÈ¾ÑÌ¾ÑÊ¹ÐÊ¿ÓÌ»ÐÌ½ÑÊ»ÐÌ½ÒÍ»ÐÉ½ÏÉºÌÊ½ÏË»ÐÌºÏÍ½ÎÊ¾ÐÌ¾ÑÍ½ÒÌ¼ÒÊ½ÒÏ¾ÒÍ»ÑË¾ÎÉºÐÉ»ÍÈ»ÐÊ¼ÐÊ·ÎÈ»ÐÊ»ÐÎ¾ÒË½ÍÌºÒÍ¾ÒÊ¼ÒË¼ÒÌ¼ÒÊ½ÍÍ¾ÒÌ¿ÒÍ¼ÒÌ¾ÓÍ½ÒÊ¹ÓÍ¿ÐË¼ÑÎÁÑÌ½ÒÌ¿ÓÌÀÒÊ»ÏÍ½ÔÌ¾ÓÌ¾ÔÎ¾ÐÌ¾ÔÎ¾ÒÐ¿ÒÎ¾ÓÊÀÎÎÀÒÏ½ÕÎ¼ÐÊÀÒÎ¾ÒÎÁÓÍ¿ÒÍ½ÑÌ»ÐÐ¿ÒÎ¾ÒÎÀÐÐÁÓÑ¿ÖË¾ÕÍÀÒÎÀÖÐÀÖÍ¿ÒÌÀÑÑ½ÖÐÂÓÎÁÔÌÀÒÎÀÒÐÃÕÎ½ÒÌ¼ÒÍ¾ÕÑ¾ÕÎ»ÓÍ¾ÒÐ¾ÕÐ¾ÖÏÃÖÐ¿ÕÍ¿ÒÎ¿ÕÍ¾ÓÐÀÓÎÂÕÐ¿ÕÍÀÐÊÁÐÓÁÕÐ¿ÓÎÀÓÐÁÒÒ¾ÖÎÁÖÐÁÒÍ»ÑÌÁÒÐÀÕÍ¿ÓÎ¿ÐÑ¿ÔÐ¿ÕÏ¾ÒÌ¾ÓÒÁÕÐ¾ÒÎÂÎÉ»ËÈ¸ÈÄ·ÃÀ¶ÃÁ·ÁÇ¹ÁÁ·¾µ¨¶®¢{okiWd]d`l_|ib~nlzqf~kdzd`z]]x`Ur]Ywl]xigwi`~g]zb_{bbtii|ndxkfzb`xd_|f[xdd~kfollg~lbnb{`d~f]{__rd]ugYzd[tdfwfbzd`wg_zkd~kgrkkilflkwkqk|z¦¦£§¡©¤®°¨¯¾³¼Å¶ÂË¶ÄÀ´ÁÆºÄÇ·Æº¯½§ »¥·³¥¼À±ÆÉ½ÎÐ¾ÐÑ¿ÐÌ¿ÒÎ»ÒÍ¿ÒÍ¿ÐÌ»ÐÎ¾ÏÌÂÔÍ½ÔÎÀÒËÀÑÑÀÓÍ¾ÐÌ¿ÒÐÁÒÍ¾ÐÌÁÒÌ½ÕÎÀÑÎÀÓÌÁÒÓ¾ÓÐÀÐÎÁÓÍ¿ÓÌÀÒÎÂÐÍ¿ÒÍ¾ÓÏÁÐÒÂÒÐ¾ÑÉ¼ÓÌ¿ÓÐ¾ÒÐ¾ÏÍ¿ÐË¿ÒÌÁÐÎÀÒÐÁÔÐÀÎÐÀÒÍ¼ÕÎÀÐÎ½ÒÍ¾ÏÏ¾ÑÍ¼ÒÑ¾ÒÌ¿ÒÌÁÑÎ¾ÒÎÀÓÎ¼ÐÎ»ÏÊ¾ÐË½ÎÐ¿ÐÐ½ÐË½ÐÍ»ÒÌÁÐÎ¿ÑÌ¾ÏË»ÎÌÀÎÍ¿ÐÌ»ÎÌÁÎÊ¾ÐÎ¾ÑÌ¼ÏÐ¼ÑÊ½ÐÎ¾ÐÌ¾ÎÊ»ÐË¾ÎÌ¾ÐÇ»ÎÈ¿ÎÌ»ÍÌ¿ÐÉ¾ÎË¾ÐÌ¾ÐÌ¼ÐË¾ÐÊ¼ÐÌ¾ÎÌ½ÎÌ¿ÏÎ¼ÌÈ»ÏÎ½ÐÈ¿ÒÊºÐÉ»ÏÌ½ÎÉ»ÌÈ¼ÌÊ»ÊÌ¾ÎÊ¼ÎÈ»ËÉ»ÈË½ÎÈºÍÈ¸ËÊ¾ÊÈ¸ÍÉ»ÍÊ·ÎÊ»ÐÈ»ËÈ»ÍÈºÌÈ¹ËÈºÍÈ·ÌÈ¸ÊÈºÉÆ·ÎÈ¹ÊÆ¹ËÇ¹ÎÆ¹ÎÆ»ÇÆ¼ÌÅºÉÆ¸ÊÃ·ÊÅ¸ÊÆ·ËÃ»ÈÆ¶ÉÂ´ÉÈºÈÉºÊÃ³ÉÂ»ÊÄ¶ÌÅ´ÇÁ·ÉÃ´ÊÃ·ÌÄ·ÊÆ³ÉÃ´ÉÀ¶ÅÁµÈÁ³Æ¿±ÄÁµÆÃµÇ¾³ÆÁµÇÃ­Ç¾µÅÁ¯ÅÃ±Æ¿³ÅÁ³È¾¸Æ¿³Ã¾²ÇÀ³Å¿±Á¼´Å¾³Æ½°Ä½³Æ½°Á¾¯Ã¾²Ã»³Â¾±ÅÂ²Â¾¶Ã¾°ÇÁ¯Å¿±Ä¼®Ä¿®Á½°Ã¼³Ã¿µÃ¾²Ã¾¯Ã¿²Ã¾²Ä¾³Å¾¯Ã¼´Á½³Â½²Áº°Â»³Ã½®Äº±Ã¿³ÃÁ°Â»¯Â¼¯Á¾°Â½®¿¾°¿½¯Á¸±Á¿³Ã¼®Ã»®À¹³½¿°Á»­Á»¯À¸¯Ã»¯À»®Á·¯Á»¯Àº¬À»³¿¸®Ä·±¿»°Á»¬¿¶±À¹¬Áºª½·®¾¹®¾·¬¾¹®¼¹¬¾´«¼»®¾·¯Á¹°¾·¬»»¬½ºªÀ¶­¾µª½¹¬½¶¬½³¬»·¬»³©½¶¨¼·§»·«º´¨¹³­¼·©»³ª¼­©µ´£¹¶¤ºµ¦»´¦º¶¤¹´©¸¶¨º¸¤¸·¤º·£¸¹¦º·¥»¶©º¹£¼µ£»¸§»·¦»·¦¹·ª»·§»·¨¾·§»»¦¼¹©»¸ª½·¨¾·§»¹ªº½©¼»©»»©¾·¥»»¨»»ª»¹«¾¹ª¾·ª¾ºª¾»ª»¹«¿»ª¾¾¨¾º«¿»¬¾»¬¾º«¿½«Á½«Â»¬¾»«À»©¿»¬Á¾¬¾¾¬Á½­ÁÁ±Á¾©Â¾«¾¾­¿¾­Á¾¬Ä»¬Á¾­Ã»ªÃ¿«Ã½®Á»¬Ã¿¬ÃÀ±Ã¿¬ÁÁ¬ÃÁ±ÅÀ¬Ã½®ÃÁ®ÃÁ­Ä¾¬Ã¼®ÁÁ«Ã¿§Á¾®Ã¾¬ÃÁ±Ã¾¯ÅÀ¬ÆÁ°Ä»°ÃÀ²Ä¾­Ã¾­Ä¿«ÂÂ¯ÃÁ°ÃÁ°Â¿³ÅÃ²Å¿³ÄÀ²ÅÀ²ÂÁ±Æ¾±ÃÁµÅÁ°ÄÁ¯ÂÃ±ÇÀµÅÁ·ÈÂ°È¿³ÄÅ¯ÆÁ´ÈÄ³ÄÂ²ÄÂ³ÆÄ²ÈÆ³ËÃ¬ÆÃ±ÈÅ±ÈÅµÈÄ´ÆÃ³ÈÆ³ÆÃ³ÄÀ²ÇÆ³ÄÃ³ÈÆ·ÊÄ³ÊÃµÈÆ¶ÊÆ·ÉÂ²ÈÇ±ÈÈ·ÅÈ²ÇÂ³ÆÅ³ÊÇ²ÊÇµÉÈ·ÇÆ°ÈÇ´ÆÇ·ÈÆ·ÊÆµÊÆ¶ÈÆ·ËÇ³ÉÆ³ÈÈ´ÊÇ·ÌÅ³ÉÇ¸ÈÈ·ÊÅµÈÈµÊÈµÈÈ·ÊÆ³ÉÈ°ÉÇµÎÇ³ÌÈ¸ËÆ³ÆÈµÊÇ³ÈÅ·ËÃµÌÊ³ÊÊ¶ÊÈ·ÍÌµÊÇ³ÍÊµÈÄ´ÌÊ·ËÈ»ÌÊ¹ÎÇ¹ÌÆ·ÌÊ·ÎÎºÌÊ¹ÊÊ·ÌÊ¹ÌÊ¹ÌËºËÆµÌÈ¸ÌÊµÌÊ¸ÎÊ¹ËÉ»ÊÊ¸ÎÉ»ÎË·ÍÊµÎÈ·ÍÊ·ÌÇ¶ÏÇºÉÊºÌË¸ÎÊ¶ÊÈ·ÌÊ¶ÌË·ÏË»ÊÌ·ÌÌ¶ÌÇ¹ÎÌ¹ÌÇµÎÊ¸ÌËºÐÌµÐÊ·ÎÊ»ÍÍ¹ÍÊ¹ÎÌ·ÏÌ·ÊÌ»ÎÌ¸ÎÌ»ÒÌ¸ÏÌ·ÐÌ»ÌÈºÐÊ¹ÎÎ¼ÎÌ¹ÐÎ»ÌÍ¼ÏË¹ÌÌ»ÍË¸ÏÎ»ÑË¸ÌÌºÌÌ¸ÎÎºÌÌ¹ÏË·ÎÌºÌË·ÍË·ÎÌ»ÌË¸ÍÌ¸ÎÊ»ÌÍ»ÍÌ¹ÎÌ¸ÎÍ»ÎÌ¼ÎÌ¶ÍÈ»ÎËºÏÎ»ÏÈ»ÎÎ¹ÓÎ»ÏË¼ÌÊ»ÏÎ»ÍÍ¾ÐÎºÓË»ÏÏ»ÏÌ¾ÏÊºÎÍ·ÌÐ»ÒÐ»ÐÌºÎÎ»ÌÎ¼ÎÎ¾ÎÎ»ÎÏ¿ÏÍºÏË½ÌÎ½ÒÍ»ÏÏ¾ÐË¹ÎÍ½ÎÌºÏÎ»ÏÐ»ÎÌ¹ÏÎ¼ÐÐ»ÌÎ¾ÍÎ»ÌÊ¹ÊÈ·ÄÃ°Á»¦¶­¡²­¡­²«¨© {xnl`n[fSz]St[Ql`MndWl`SqbSkb[ql_qiYn[SnUSnlWkdUkb_lgWnd[q`[nfSlWQggUo][lbSn[[n]Wn]Uq_Yrg[tn]rd]odYq`Ukb_q`Wo_Ui`Wr_YnbWni[odYr]Sl]Un]Uq`SqdWrbUqfSt`SodYqdYudUxig|xl{owk~txr|q³£¥»¬°¾®²´©µ¾¬·¯¢µ¬ ©®³Á«ÁÈ²ÆÊ·ÇÌ¹ÌÐ½ÍÍ»ÎÎ·ÍÍ»ÉÎ½ÎÌºÎÌºÍÉ»ÍÍ»ÎËºÎÊ¹ÌÊ¹ÏÌ¸ÌÌºÏÌ»ÏÎ»ÐÌ¼ÐÍ·ÐÍ¸ËËÀÍÎ»ÎÌ¼ÌÍ»ÍË¾ÎÍ¼ÏÌ»ÎÌ»ÊÌ¹ËÌ¾ÎÌ¼ÒÌ»ÎÌºÌÍ»ÎË·ÐÎ»ÌÊºÊÍ¹ÍÏ»ÌÌ¼ÌÊ¿ÍÏ»ÌÍ·ÎÎ½ÐÌºÎÎ¾ÏÌ¾ÌÎ¸ÎÊ»ÎÈ¸ÌÎºÌÌ»ÌÊ½ÊÊ¸ËÌ¾ÎË·ÍË»ÏË¸ËÊ»ÊÌ¸ÌÉ¸ÌÊ»ÊÊ¾ÏÎ¸ËÊµÈÈ¸ÊÊ¹ÊÈ»ÌË¹ÊË·ÌË»ÌÊºÎÎºÎÉ¸ÊÉ¾ÊÌ·ÊÊ¹ÌÊ¾ËÌ¹ÌË·ËÉ¼ÌÌ»ÌÇºÌÈ¸ÌÊºÍÈ·ËÉºÊË»ËÌ¶ÊÈ·ÌË»ÍÊ·ÌÊ¸ÊÊ»ÌËµÌÆ·ÈÉ»ÆÊºÈÊ·ÊÇ¸ÉÃ»ÈÊ¹ÊÇ·ÌÈ·ÉÄ´ÆÆ¶ËÉ¸ÊÅ´ÈÆ³ÈÈ·ÊÈ·ÈÅµÇÅµÇÇ´ÌÈ¸ÈÈ·ÇÉµÈÆ´ÈÆ·ÆÇ·ÊÇ´ÆÅ·ÊÃ´ÈÅ³ÉÄ¶ÈÆ³ÆÉ¸ÆÄ·ÈÃ¯ÆÄµÇÄµÆÁ´ÆÀ²ÆÂ´ÆÆ³ÄÆ·ÆÂ²ÄÃ²ÄÅµÄÁ¶ÆÅµÉÄ³ÆÁ³ÄÃ´ÃÃ°ÅÃ´ÄÄ°ÆÃ±ÆÃ³ÃÁ²ÃÁ±ÆÂ­Ã¿µÁ¿±ÃÁ®Ä¾®Ä½¬Â¾¬Â¿¯ÁÁ¯Ä¾¬Ã¾°Â¾®ÁÁ±Á¾¬Á¾¯À»­Á¼­Á½¬Á½®Á¾°À¾±Á¾ªÂ½¬Ã¸°Á¾©¼¹­¾»¯¼½®Ã¼¬À¼®ÁÀ¬Ä¾®¿½­¼º¬Á¾¨¿º©¾½¬À»³Ã»­¾»­Á»°Àº²½»­Àº¬½¼¬¾¹¬¾»¬¾»¨»¸­¾»®À»­¾½®»»¬½»ªº»©½¹­»»«»»¬¼¼¬¾º«»½­½»ª½¸¨¾º©¾»®½»«¹¸¨»·¬À·©¼¹ª¹¸­½¼¬¼¶ª¾·©»³§»·§º¶¨ºµ§º´§¸³©¸·©»µ¥¹¶©»µ©»µ¦¼·©¸·¦¹¹¨ºµ«¸µ©·µ©¹·§·µ§»´¤¶¶§»·¤¹¶£¸³¥·³§·³¥¸³£·²¤¸µ¨·³¨´³¦¶´¤¸·¤·³©¶¹¬¼¸¨½¹ª¾»¬¾»¨¿º¯¾»­¿´©Á»¬À¸¬¾¹¬¾·«½º«Á¹¨¿¶®À¶¬»·¬¿¹¬¾¹¬¾¹«¾»¬Áº¬Â»ªÂ»°¾¼®¿·¬À»¬Á¶«¿½¯Ã»«À»±À»­¾»¯Á»®Á¼¬Æ»¬Á»¯À»¯Ä»­Â¼°Ã¾²ÃÁ°Á½¯Å¾°Ã¼³Ã¼®¿¾±Å»±È»¯Ä»²Â¾²Ã»±ÅÀ³Å½°Æ»´ÇÁ±ÄÃ°Æ½³Å»´È¿´Ä¿³ÃÁ³Ä¾³È¿³ÈÀ³ÅÀ³ÆÀ¯È¾¯ÂÁ´ÆÁ³ÆÁ³ÇÁ³ÈÂ³ÆÆ´ÈÀ³ÆÀ®ÈÀ³É¿³ÈÁ¯ÆÀ±È¿¶ÉÃ´ÈÁ´È¾³ÊÀ²Ê¿´ÈÀ´Ç¿±ÈÁµÊÁ³ÈÀ®Ç¿²ÇÂ·ÇÁ¶ÊÃ¶ÉÃ¹ÈÇ¶ÉÃµËÅ³ÇÃ·ÊÁµÉÇ¶ÆÃµÉÃ´ÊÃ¶ÍÃ¼ÉÇ·ÊÅ³ËÃ·ÈÅ·ÊÃ·ÊÄ·ÈÆ·ËÁ·ÇÅ·ÌÄ¹ÌÈ¹ÊÅ·ÇÆ·ÊÅ·ÈË¹ÌÇ¹ÌÅ·ÌÃ»ÌÃ¸ÌÈ»ÍÇ·ÌÈºÍÉ»ÎÈ»ÎÆ¼ÊÉ»ÍÄ·ÍËºÌÈ¼ÎÅ¶ÏÇ¼ÌÈ¸ÍÆ»ÌÆ·ÌÉ¾ËÊ·ÍÆ»ÌÆ½ÌÆ¶ÌÇ»ÌÉ¹ÍÊ¹ÏÉ¹ÐÈ»ÌÈ»ÐÆ¸ÌÉ»ÎÊ½ÑÊºÍÇ»ÎÈ¶ÎÊ¹ÏË»ÍÆ¸ÍÈ·ÐÈ¼ÐÉ¸ÏÆ¸ÌË¼ËË·ÎÈ»ÍÊ»ÓË»ÐË»ÒÇºÎÈºÎÊ½ÐÉ¼ÏÊ»ÐÊ½ÐÊÀÑÊ¼ÏË¹ÒÏ»ÍÊ¿ÑÊ»ÔÊ¾ÒÍ¿ÎÍ½ÐÊ¹ÓÉ¼ÐÌ¼ÐÌ¾ÐÊ¿ÐÌ»ÎÌÀÑÊÂÏÎ¾ÔÎ¾ÐÊ¾ÓÈ¼ÐÎ»ÒÈ½ÏÌ»ÓÌ»ÐË¾ÍË¾ÐÌºÍË¼ÐÊ¾ÒÌ»ÐÊ»ÑË¾ÕÎ½ÑË¾ÒË¼ÐÎ¾ÑÊ¸ÐÌ»ÎÍÁÔÎ½ÒÎ¿ÑÌ¼ÒÎ½ÐË¼ÒÏ¿ÓÉ½ÐÍ¾ÑÌÀÒÏ½ÔÌ»ÐÌÁÒÏ¼ÒÍÀÓÎ¾ÑÏ½ÓÎÁÓÏ¿ÓÌÁÑÊ¾ÑÐÀÒÏ½ÔÐ½ÑÎÂÓÎ½ÒÐ¹ÓÏ¾ÓË¾ÒÏÁÓÎÀÓÊ¿ÓÍ½ÓÍ¾ÑÐÀÓÐÀÓÎ¼ÒÏÂÓÎ½ÓÍ½ÎÏ¿ÒÐÀÕÎ»ÒÍ¿ÒÌ½ÒÏÁÒÐ¼ÓÍ¾ÔÏ¼ÐÍ¼ÓÎÀÓÎÁÓÎÂÕÒ¿ÕÑÀÓÒÀÕÏÁÓÎ½ÓÐ¿ÕÎ¿ÓÐ¿ÕÎÁÓÒÁÔÓ¿ÕÐÁÒÌ¾ÓÑÂÔÎ¾ÒÐ¿ÓÎÂÓÐÀÐÐÀÓÎ½ÓÎÀÔÐÁÕÐ¾ÓÑÀÒÑÂÕÐÁÕÏ¾ÎÎÁÎÐ¾ËÈ¹ÈÄ·Á´¬¹¬¡xtqkkfk_d_~g`xdWx`_w_]t_[ri`rg[w]_r]Uo_gqg_nS[ob_rbYob`nkftdbt[_rgbrdfu_]tfbub]r`Yw]_u]`ui_wfgxqb{iitlgwgbtf_r`_ub_ub[rbdud`x`bzkb{kgxfWrg]qfbx`_w_`u__qd_u][ug_ui_zd`{``wk]zfbl`~ogk_~qf{z¤¤§§¥ ¬¥¨±¶º®¾Æ»ÆÎ¾ËÍ¾ÍÓ¼ÑÏ¿ÓÎÃÏÐÀÕÏÁÓÌÀÑÌ¾ÓÍÀÓÌ¾ÒÊ¿ÑÑ¿ÑË¿ÑÐ¼ÎË½ÓÌÀÒÒÁÕÐÀÒÌÁÒÌ¿ÐÍÂÕÒÁÐÍ¿ÕÐÁÐÎ¿ÕÎÅÓÏ½ÒÐÁÓÐÁÓÐÁÒÐ¾ÎÐÁÕÐÀÓÒ¾ÑÐ¼ÒÑ¾ÒÒ¾ÒÎÁÓÏÀÒÍÀÎÐÁÒÐÀÓÐ¿ÑÐ¾ÏÎÁÕÎ¾ÑÌÀÎÍÀÒÏ¾ÓÎ¾ÓË¾ÐÌ¾ÒÎÀÒÏ½ÐË¿ÐÎ¿ÏÌ¾ÒÌ¿ÒË¾ÐÊ¿ÍÎÀÐÏ¾ÐË»ÑÌ¾ÐÐ½ÏÍÀÒÌ½ÒÍ¾ÌÍ»ÒÎÁÑÌ»ÒÍ¿ÐÍÁÑÐÀÏÊ¿ÍËÀÐÊ¾ÑÌ¼ÍÌÁÐÎÁÐÎ¾ÎÊ¿ÐÍ¾ÒÈ»ÎË¼ÎÌÁÑÉ¼ÎÈ¾ÑËÁÐÍ¼ÌÈÁÐÌÁÒË¾ÎÊ½ÐÌ¾ÏÊ¶ÎÈ½ÎË¾ÌË¼ÎÉ½ÌË»ÐÊ¿ÌÉ½ÎÈ¼ÌÈºÐÈ½ÍÊ»ËÈ»ÎÉ»ÌÇ¾ÊÉ¼ÌÈºÎÈ»ÌÈ¹ÌÊ»ÎÅ»ÈÉºÌÊ½ËÇ¹ÌÆ»ÈÇ»ÎÆ»ÌÊ»ÊÇ¸ÍË»ÌÆ»ÎÇ·ÊÆ·ËÈ½ÊÈºÊÆ·ÊÆ¹ÌÃ·ÊÆ¸ÊÆ»ÈÅ·ÊÆ·ÉÃ»ÈÂ·ÊÆ·ÈÆ·ÌÆ¹ÉÇ¹ÉÃ·ÈÅ³ÈÆ·ÊÂ·ÈÃ¹ÈÅ¸ÊÆ·ÈÁ¸ÈÄ·ÊÄ¶Ç¿´ÆÁ·ÇÁ¶ÊÂ·ÈÅ´ÇÁ³È¾³ÃÂ¸ÉÂ²ÈÀ³ÆÀµÅÂ·Æ¿³Å¿¶ÈÁ³Å¿´ÂÁ²Æ½³Æ½³ÆÂ¶Æ¿³Ã»±Æº°Æ¾±ÃÁ±Ä¿³Á½±Ä¾³ÆÁµÃÀ±ÅÀ³Å¼³Ã¾²Ã¿³Ãº³ÁÂ³Æ½±Ä½³Á½´Ä¿²Á¼³Ã½³Ã¼²Á¾®Ã»°Â¼¯Á¾³Ã¹³Â¿°Ä¼±Â½³Â¼²Ã½±Â¹±Ã»°À¿²Ã¼®Á¼°Ã»®Á¾¯Á½´À½¯Ã¸¬Á¼¶À¼²Àº°À»¯Ã½³Â¹°À»±Á½¬Á¼°¾»¯À·®Á»¬¾º¯¿¸®½·¬Á¸¯½·¯¼¹¬½º®¼¶©¿¹¬¿·®¹¶­¿º¬À¶¬»·¬½¹ª¾¹­¼º¯Á¶¬¾µ¬»·¨¾·®¼´®¼³ª½¹©»¹¬¾²«½µ«»´«»·ª¼²ª»·¬º¬¢²¶¤¸³©·µ¥·µ¥··¸¶©¸·§¹·¥¸¶¦¸·¥¸µ¥¸¸¥¹¶©¾¸¥º·«»µ£¸¸§¼¸§»¸¥»¹¥»·¥¾¶£ºµ¥¼·©¼»ª½¹§»»¦À·ª¼¸ª»»ªÀº§»·ª¾»«Á¸«¾¸«»»§¾»ª¾¼«À»¬¾¹©¾»¯¾ºª¾¾­À¼¬¿¼«À»«¼Á®Á¾«¾»«¾½©Á½©Áº«¾»­Á¾®¿À¬À»«À¾¯À¾¨Ä½®Á¾®Ã¾©Ã¿¬Ã¼­Ã¾¬Ã¾¬Ã½¯Â¾«Å½«Ã»¯ÁÀ®Ã¿®Á¿¯ÁÀ°ÆÀ«ÁÁ­Å¾¯Å¾¯Ä¾®Ã½¯ÄÁ¨Ã»©Â¾¬ÃÀ«ÄÁ«Ç¾¯ÃÁ®Ä¾®ÆÀ±ÄÁ­ÂÁ®ÁÀ¬ÆÁ¯Ä¾­ÂÀ°ÅÁ²ÆÃ°ÃÂ°ÃÀ²ÄÂ±ÆÀ²Á¿°ÄÁ³ÅÃ¯ÃÁ´ÉÁ±ÇÂ°ÄÄ²Ç¿²ÆÁ³ÅÄ²ÇÁ°ÉÃ³ÆÄ³ÆÄ³ÇÄ°ÆÇ¶ÅÀ´ÆÆ´ÅÃ·ÆÅ°ÇÅ°ÆÃ³ÇÆ±ÆÆ³ÈÃ¶ÅÄ¸ÌÈ±ÆÄ´ÇÆ´ÉÇµÌÄ¸ÊÅ³ÇÈµÊÇ³ÇÆ³ÇÆµÈÂ±ÆÇ·ÊÄ´ÊÆµÈÇ¶ÇÃ³ÌÇµÌÆ´ÆÆ´ÊÆ±ÈÆ°ÉÆ´ÍÈµÌÅ·ÈÇµÈÇ³ÊÄ¶ÈÆµÊÉ³ÊÅ¸ÊÆ³ÉÆµÊÇ¸ÇÇµÊÊ³ËÆµÈÇ²ÊÊ·ÉÆµÇÆ·ÊË´ÊÈ·ÎÆ·ÊÉµÌÈ·ÌÇµÊÈ·ÍÇ·ÌÉ¸ÊÊ¸ÍÈ·ÊÇ·ÍÌ·ÏÈ¸ÌÈ¸ÊÉµÌÎ¸ÍÉ¹ÉÊ¹ÎÊ³ÍÇºÌÊ¶ÉÌ·ÌÊ¸ÌÊ»ÊË¹ÏÈ·ÌÊ·ÉÌ¹ÎÌ·ÍÈ·ÌÈ¸ËÊ¸ÎÊ¹ËÊ·ÌÉµÊÆ¸ÌÊµÈÇ·ÌÈ´ÉÌ¸ÊÎ·ÌÊ·ÍÉ¸ÊÌ·ÌÈ·ÍÊ¸ÎÌ·ÎÈ¸ÌË»ÎÎ»ÏÌ¹ÐÍ·ÌËºÐÌ¸ÎÍ½ÎË¸ÌÌµÎÌºÌÊºÒÊ·ËË·ÏÊ»ÎÌ¼ÏÌ»ÌÍºÎÍºÐËºÌÏºÌÊ»ÍÌ»ÏË¼ÐÌ¾ÎÍºÎÊ»ÍÈ¹ÐÎºÎÊ½ÐÌ½ÎÊºÌÊ·ÏÏ»ÍÌ·ÏË¹ÌÌ¹ÐË»ÌÉ¹ÏÊ»ÎÏºÐË¹ÌÊ´ÎÊµÍÊ¸ÌÊ·ÌÌ¹ÍËºÍÈ¸ËÌ¸ÎÊ»ÎËºÏÌºÐË¼ÎÎ»ÍÌ¾ÐÍ¸ÏÍ¶ÎÍ¾ÌÍºÑÍ»ÐÎ¼ÏÍ¸ÑÌ¾ÌÏ»ÑÐ¾ÐÌ¼ÍÐ¼ÒÏ»ÏÌ½ÎÌ»ÑÌ»ÐÌ¾ÏÏ¼ÏÎ¼ÎÍ½ÎÐ¾ÍÎ»ÏÎ»ÍÌ½ËÍ»ÊÇ²Ä·­¿º¬·¶¢°£{oqftgkf~kYzdYr]Wt_Qt`Sn`WodUq`Sk_Qk`QfbSlUMiYMdSOgWMfUMiYSf]Si]Wn]Sd_Sl`Qn`Ul]WibUl]QidWnf[gbOnb]nl]nqWq`Yl]]ngSq]Wg`Yk[UibQgfYgfWkgUkg]kfYndYqgWnfYoi[kg]nn]nnUndWgkYk`Qn`UqbUndWodSl`SqbQndUi`Sr]Un`YtkYwtn{{qt{u{ »¢®Ã¬ºÊºÁÊ»ÆÌ·ÉË¾ÎÏ»ÎÎ»ÌÌ»ÐÌ»ÌÏ»ÍË½ÍÎºÎÌ¸ËÌºÎÎ»ÎÎ·ÏÈ·ËÌ½ÍÏ¼ÍÊ»ÌË»ÏÏ¼ÎÊ»ÒÎ¸ÌÍ½ÏÌ»ÌÍ¹ÊÌ»ÎÈ¹ÍÎ½ÎÏ¾ÌÏ»ÏÊ¼ÌÍ»ÌÎ»ÊÐ¾ÌÌ»ÎÌ¹ÐÉ»ÎÌ»ÎÊ¾ÎÌ»ÌÌ¾ÌÌºÎË¼ËÐ½ÐÌºÐÈ»ÎÎ¹ÌÏ¼ÒÍ»ÌÍ»ÎË»ÏÌ½ÌÌ½ÊÌºÍÊ¸ÉÎºÊÍ¹ÑÊ»ÊÊ¹ËÌ»ÎÊ·ËÊ»ÊÎ¸ÎÌ»ÈË¼ÊÊ»ÎË·ÊÈ»ÍÊ·ÌÌ·ÊÈ·ÊÍºÊÊ»ÊÈ»ÌÊ¸ÉÎ·ÌÌºÊÊµÊÊºÊÌ»ÊÊºÌÊ¸ÈÈ¸ËÊ»ÌÉ»ÌÆµÌÇ¹ÈÆ·ÉÌ»ÊÆ¸ÊÉ¹ÈÈºÈÈ¸ËÊ·ÊÈ·ÊÉºÈÊ·ÌÈ¶ÌÇµÉË»ÍÇ¹ÉÆ´ÆÈ¹ÉÇ·ÊÅµÉÈ·ÈÊ¸ÇÈ¸ÊÆ³ÇÆ³ÊÅµÈÆ¹ÇÆµÊÅ´ÆÅµÈÈ¸ËÈ³ÆÄµÇÈ¸ÇÇ¶ÌÅºÈÈ·ÈÄ³ÆÄµÈÈ¹ÇÆ´ÆÆµÆÅµÈÆµÆÃµÆÅ³ÇÃ³ÊÃ´ÄÁ·ÅÅ¯ÆÆ²ÄÃ³ÆÄµÄÅ²ÁÃ²ÈÅ³ÅÁ²ÆÅµÄÆ´ÆÄ®ÆÁ²ÃÃ³ÆÃ±ÆÁ³ÆÃ´ÆÃ®ÆÃ²ÅÀµÃÂ­Ã¿¯ÃÂ¯ÁÁ­Ä¿°ÁÁ³ÃÁ¯ÅÁ­Á½°ÁÁ±Ã½­Â½²Ã¾®Ã»®Á½­ÂÀ®Â¾¬À¾¬ÀÀ­À¿«Á¾¯Á½¯Â¿¬¿»®Á¿°Á¼¬¾¼­¾¾°Â½«À»­Á¼®¾¼¬Á½®½¸°¾Á¬Â¾«¾¸¬½½ª¿½°Ä¸®¾½¬½¹©¾¹°¼¼«À»ªÁ¸®½»¬¾¼«»º§»»ª¿»­¾»¬º»­¼¹«½·­½·¨¾º©À½ª»¹«¿»¬¾º«½º­¾»«½¼¯½¸­¾ºª¾º«½ºª»º«½¸©º»§¼»¬½¸¦½¹¬¹º«»¸§¼¶©¸·«»¹ª¸·ª¹¸ª¸µª¹º¬¸·§º¶§»µ§½·©¸´§º¸¤¸¶§»·¦»³©¶¶¢»·¥·µ¥·³¨¸¶¥·³§·µ¥·µ¦·µ¦¶²¥·²§¹´£·²¥¶²§¶·¦º°¨·¹ª¾¸©½µ«¼¸«»¶§½¹­½¸«À·¬¾¶¨½»­¾¶ª¿¹«¼·®Á·¯Â¼®Á·¬¿¹©Á»®¿¹¬¾»®¿¸¬¾º³Ã»¬Á·¬Á¹®À»°Â¹¬¾·­À¹±¾»­Ã¹¬¾»¬Á¿¬Ã½­Ã¹¯Á¿¯Ã»¯ÁÀ°Â¼³Á»²Á¾±Â½¬Ã¼¯Åº¯Ã¿±Æ»®Ã»°Ã¼°Ã¾¯Åº°Å¾¬Ä»°Å¾¯ÅÃ³Å½¯Æ½³ÁÂ±Ã¿°É¾²ÈÂ²ÆÀ°È¿°È¾³ÇÀ°ÅÁ±ÆÀ³Æ¾±ÇÀ¯ÈÀ³ÅÂ´È¾³ÈÂ²ÈÁµÆÁ³ÈÁ³È¾³ÇÀ¯Ã¾³È¿µÇ¿°Ê¿²Ç¿°ÇÁ³É¾²ÉÁ¶ÉÃ³ÈÀ±È¿´ÈÃ±ÊÁµÈÁ·ÈÁ·ÈÀ³ÆÃ³ÈÁ³ÉÀ³ÈÁµÊÄ·ÊÁµËÂ´ÊÅ¶ÌÅ·ÈÅ±ÊÂ¸ËÃ·ÈÃ·ÇÅ·ËÅ¸ÊÃºÉÆ·ÌÅ³ÊÃµÈÈ¶ÌÅ¼ÊÃ¶ÉÆµÌÅ·ÉÆ·ÊÆ¹ÍÇµÊÅ¶ÍÈ¹ËÆµÐÆ·ÌÈ¹ÌÆ·ÍÈ¹ÌÅ¹ÎÉ·ÌÆ»ÎÅ·ÉÃµÌÉ¼ÎÅ·ÍÆ·ÌÆºÎÉ¹ÌÈ»ÏÈ¸ÎÆ·ÎÊ»ÎÈºÏÊ¸ÎÆºÊÉ·ÏÈ»ÍÆºÎÊ»ÍÊ»ÏÊ»ÑÉºÎÈºÏÈºÐÉ»ÑÊ¸ÐÈ¼ÌÉ·ÍÌ¹ÏÈ¼ÌÈ¹ÐËµÏÊ»ÍÉ»ÏÈ·ÏÈ·ÌÊ»ÏÈ¹ÎÉ»ÍÉ»ÎÈ·ÑÈ¸ÎÌ¼ÐÊ¹ÐÊ¼ÑË¾ÑÌ¼ÐÈºÎÎÀÒËºÐÌÀÐÊ¼ÐÌ»ÓÍ»ÐÈ»ÌÍ¿ÒË»ÐÇ¼ÏÌºÎÌ¾ÐÐ»ÓÊ¼ÐË¹ÑÌ¾ÐË»ÐÎ¹ÎË»ÏÊ¼ÐÊ¾ÒÊ»ÍÊ¾ÐÊ¾ÌÌ»ÐÌ¾ÏÊ½ÐÌ¼ÒË»ÎË¼ÒÊ»ÒÌÁÒË¼ÑÌºÒÊ½ÒÌ¼ÎÌ»ÒÌ¹ÒÊ¿ÓÎ¿ÒÐ½ÑÌ¿ÑÌ¾ÑÍ¼ÒÎ¿ÐÎ¿ÔÏ¼ÒÎ¿ÒÏÀÒÏ½ÓÌ½ÎÍ¾ÒÒ½ÓÌÀÒÎ¾ÐÍ¾ÓÌÁÐÌ½ÓÌ¿ÒÎ¾ÒÎ¾ÓÐÁÓÌºÓÐÀÓÌÀÕÌ»ÐËÁÒÎ¿ÒÍÁÒË»ÏÎ¾ÕË½ÓÌ½ÐÎ¿ÒÎ¿ÔÏ¿ÒÍ¾ÒÎ¾ÕË½ÐË½ÏË»ÒÎ½ÑÊºÒÐ½ÐÍ¾ÕÍ¾ÓÏ¾ÓÌÀÒÏ¾ÐÎ¾ÕÏ½ÓÐÁÓÑÂÕÐ¾ÒÎÁÓÐ¿ÑÐ¼ÔÎÀÓÐ¿ÓÒ¾ÖÐÀÓÎ¾ÓÒÁÓÒ¾ÑÐÁ×Ð¼ÒÐÃÒÐÁÕÒÁÔÎ¿ÒÒÁÐÑÁÕÐÁÒÐÁÒÐÁÐÏ¾ÍÏÁÌÆ´Ê³©¾§¥°¯£®£wuldb_f`ud`xf]u``q_]qWQud]of_uf[ukbtf]r`]r[WqUUo[WnOWkWUlWSk][r]_q]]rYSoY[q][ub`lbdrbYrbWq]`wbburb{|qx~k~dbxY[q[Wn]UrUUk_Yw_]ob]qfbqn`{odulkuibxibulbufbu`Yob[odfzkdtkiz~i~lfwkfwtdwi_z__ob`r_]r_]o__t][t`_wf`wi`zid|gf|qlzu¢¡½°²Ã·»Æ·ÃÈ¹ÆË»ÉÎ½ÊÏ¾ÏÐ¿ÓÎ¿ÑÓÃÒÊ¿ÏÎ¾ÔÐ¾ÒÏ¾ÐËÁÒÒ¼ÒÑ¿ÒÐÃÑÑÁÒÒ¾ÓÐÁÔÍÄÔÑÁÕÎÁÓÎÁÒÐÂÒÊ¿ÒÐÁÒÍ¾ÔÌÀÒÍÁÒÏ¿ÓÐÂÒÏÀÒÐÀÐÌ¿ÐÎ¿ÏÍ¾ÒÐÀÖÍÃÒÏÀÒÌÁÒÌÀÓÎ¾ÒÐ¿ÐÎ½ÑÐ¿ÓÎÀÒÐÁÓÎÁÖÎ¾ÐÏÀÑÎÀÐÎ¾ÒÊÀÐÌ¼ÒÏ¼ÓËÁÒÌ¿ÐÎ¿ÑÏ¾ÒÍÁÍÊ¾ÒÊ¾ÐÉÁÎÐ¿ÕÊ¿ÎÌ¿ÐÍ¿ÕË½ÐÍ½ÐÌ½ÐÈ»ÎÊ»ÑÈ»ÎÌ¿ÑË»ÍÏ»ÒÍ¾ÐÈ¿ÐÏ¾ÐÏ½ÐÍÁÐË¼ÑÌ¾ÐÎÀÓË¾ÐÊ½ÎÈ¼ÎË¾ÐÊ¾ÐÊ¾ÏËÀËÉ»ÎÉ¿ÐÆ¾ÐÊ»ÒÍ»ÒÌ¾ÏÌ¹ÐÌ¹ÏÈ½ÎÊ»ÎË¼ÌÆ»ÍÈ¼ÐÈ»ÍÆ¼ÌÌ»ÏÊºÌÆ»ÍÈ»ÏÊ·ÍÆ¾ËÆ¼ÉÊºÍÈ»ÌÉ½ÍÈ¼ÏÈ¸ÊÇ¹ÊÊ¾ÍÇ¼ÌÈºÍÈ¹ÎÈ¼ËÆ¹ÌÊ·ÎÊºÍÆ·ÈÉ¹ÐÇµÉÅ·ËÅ¹ÍÉ»ÊÆ¹ÈÁ·ËÈµÌÇ·ÉÃ»ÊÆ¹ÉÆ´ÊÂ·ÊÈ·ÉÆºÊÆ¹ÈÃµÊÃ³ÆÅºÉÃ·ÊÅºÊÀ¹ÊÃ¸ÉÃ³ËÃ¹ÊÄ¹ÈÇµÊÀ¹ÉÁºÈÄµÈÁ´ÈÃ·É¿·ÉÁµÆÃ²ÅÁ´ÉÀµÉ¿´ÆÃ³ÆÁ³É¾±Ã¿³Â¿´Ã½³Â¿´È¿³ÃÀ´ÆÀ²ÈÀ³Æ½°ÂÃ±Å¿±Ã¾µÅ¼³Ä¿±ÇÀ´Ä»µÂ¿°ÅÀ³Æ»³Æ¾¯Ã¾°Á¼±ÀÂ±Ã½±Ä½±Ä¿³Ã½¯Å¹µÀ¾¯È¿³Ã½³Ã»®Á»³Â»±Á»´Ä¾³¿»²Ä½®ÁÁ²Á»³Á½±Á¾¬Â»±Á¼µÁ¾¯Á¼±Á¾³Ã»ªÂ½®À»°Ã¿¬Âº¬À¼±À»²Á¹­À¼³À»®Àº«Á»°¿¸²¾º¬¿·®Á¹¯Á¸³¿·¬Á¹¯¿·­¾¹®¾·­¾¹¬Á¹¬À¸®¼¸«À¶¬À»¬¾»«»³¬¿¶©¼¹©¾µ¬»·¨º·®À¸«½´¬º²ª»»«»·©»´®»´©»³¨¼´¬½·¨º¬§³³¦¸·¥¹·§¸·¢»µ¦¸·¥¹¸£¹»¨¼µ¤¸¹¥¹¶¦»¸¦¹¸§»·¨º·¨¸¹¦»¸¦¸»¤»·ª»·¤¼¹§»¶¨»¸§»º©¾¶§»¹¥¼·©»·§¾¹©½ºª¾¼¦½·­¾½§Á»§¿¼©¾»«¼¼«Ãµ©¾»«Á¾¬½»¨À»¬¾½®À½¯À¼¬¾¹§¾¾ªÁ»§¿»©¿¸¨¾»¬À½¬Á¼«Á»°ÃÁ¬Ã¾¬À»®Â»«Á¾­Ã¿¬Ä¾«À¾¬Á¾®Á»¬Â»¬Â¿¬ÀÀ®Ã¾¯Å¼©ÃÀ­ÃÂ¯ÅÀ±Ã½¬Ã¾«ÄÁ¬Ä¾«ÄÁ®Ã¿«¿¿­ÅÀ¬Ã¾¬Å¿¬ÃÀ®ÃÀ®ÅÀ®ÄÂ¬ÃÁ¬ÂÀ¬Ã¾¯ÃÁ±ÅÃ­ÁÃ²ÆÁ­Ã¿¬ÃÁ³ÅÃ°ÇÁ­Â¿³ÄÃ­ÄÀ³ÄÃ±ÆÂ±ÆÃ¯ÁÂ®ÃÃ°ÅÁ±ÇÃ³ÆÁ°ÄÄ°ÇÁ³ÆÆ´ÇÃ®ÉÆ±ÆÄµÆÆ³ÈÄ³ÈÁ·ÅÄ²ÇÃ´ÉÅ´ÈÆ³ÅÆ³ÉÅ´ÊÆ´ÊÄ±ÅÃ³ÊÅ¸ÊÄ²ÇÆ´ÊÇµÊÈ¶ÆÆ·ÊÄ³ÆÄ¶ÆÇ³ÇÄ¶ÇÇ·ÈÆ·ÊÄµÈÆ²ÈÅµÈÆµÌÇµÊÈ³ÈÈµÊÇ³ÌÆµÈÇ³ÈÈ´ËÈ¶ÊÈ¸ÊÇµËÇ³ÊÇ·ÇÉµÊË³ÈÈ´ÊÈ·ÎÉ´ÊÇ²ÊÉ³ËÈµÈÆ´ÈÈ·ÌÇ²ÈÅ·ÊÈ¶ÊÈ³ÊÈ·ÈÈ²ÉÈ·ÍÊ´ËÇ·ÉÈ¸ÍÊµÌÉ¸ËÊµÎÊ·ÎÉ¾ÌË¸ÏÉ¸ËÍ·ÌÊ·ÎËºÌÊ»ÌÉ·ÏÊ²ËÇ·ÊÇ·ÌËºÏÆ·ÐÊ¸ÌÉ²ÌÊ·ÎÊ¼ÌÈºÌÊ·ÌÊµËË·ÎÉ·ËÊµÌÊ¶ÌË¶ÊÊ¹ÊÊ·ÎÊºÌÆ¹ÎÌ·ÌÉ¹ÌÈ¸ÌÎ·ÎÊ¹ÎÊºÎÈ·ÊÌ¸ÎÊºÐÌ·ÐË·ÌË¹ÌË¹ÎÈ¸ÏÊ¸ÎÌ¹ÎÌ¹ÏÌ¸ÏÌºËÌ¹ÏÌ»ÐÌ½ÍÍ¹ÐÎ»ÏÊ¾ÐÊ»ÏÌ¼ÏÌ·ÌÎ¼ÐÎ¹ÎÊ¼ÎÏ»ÐÌµÏÎ¸ÏÎºÍÌ¸ÒÊ¹ÎÌ»ÎÌ¼ÐÌ»ÌÊºÌÌ¹ÎÊºÏÌ»ÏÎºÌÌ¼ÐÌ»ÏÍ»ÏÎ¹ÏÉ¼ÏË¹ÎÌ¸ÌË»ÏÌ·ÎÌºÎÌ¹ÌÏ¸ÎÎ¸ÎÌºÎÎ»ÎÐ½ÎÌºÐË½ÑÏ·ÐÍ»ÎÌ»ÎÎ¸ÐÌ¸ÏÏ»ÎÎ¾ÏÎºÎÑ½ÐÎ»ÐÐ¹ÏÌ¾ÓÐºÏÎ»ÐÎ½ÎÏ¿ÑÎ¸ÎÎ¹ÍÒ»ÓÎ¿ÌÐÁÎÌ»ÉÎºÆÊµÂ«¡¸§¨¢¡qg]zdSw]Oq_Wn`SndOngQl]Si`Qk_Ok_SidYl]WndWgdYn`QkUOd`QgYDfUIbUQf_Og`Oi]OfYKiUDdQMd`Si`Qi`Yl`OodWkq`nwdtrbq][oYIbWFiUQg[Qf_IdYQiYQi_OkYMf_Qi_SogYlbWngUrbSl`Sf]Kg]Mg`SifUl`Qk`Ukd[kgWqg[o`Un]Yk_Qf]Qi[QdYQf]Og_SfgYg_Qk_Qn`Ok`Ung`uog~©¥·©²À¯¸Æ·½É¶ÂÊ»ÈÎºÉÍ»ÊÌºÎÌ¶ÍÉ»ÍÌºÌË¹ÌÏ¸ÊÎ»ÎÏ»ÌÌ¿ÐÎ¼ÐÐ»ÎÎ»ÐÏ»ÐÐ½ÎÏ»ÍÎ¾ËÍ»ÏÏ»ËÌ¾ÌÌ»ÌÏ·ÐÌ½ÑË½ÍÌ»ÌÊ»ÌË½ÏÐ»ÍË½ÌÏ¼ÌÍ»ÎÎ»ËÎ¹ÏËºÏÍ»ÎÏ¹ÎÎ»ÏÌ¸ÊÎ¹ÎÌ¹ÓÏ·ËË½ÎÍºÎÎ½ËÊ¾ÌÍ»ÊÎ»ÌÊ»ÌÌºÎÌ»ÍÍ»ËÎ¸ÎÊ·ÌË¼ÌÌºÊÎ»ÎÏ¼ÌËºÊÊ·ÌÉ·ÌË»ÊÌ»ÌÌ¼ÊÉºÍÌ·ÊÈµÊÌ»ÌË¹ÏÈºÌË¸ÉÎ·ÏÌºÎÊºËÌ·ÍÍ¼ÐÌ½ÌÊ»ÍÈ¹ÏÉ¹ËÈ¶ÍË·ÌÆ¶ÆÉ¸ËÊµÌÊ·ÆÇ·ËÉ¸ÌÈ·ÉÆºËÊ·ÌË·ÈÉ¹ÊÇ³ÈÈ·ÉÉ¹ËÈ´ÉÈ¹ÌÈ³ÈÇ¶ÈÈµÈÌµÈÉ¸ÌÈ¶ÊÄ¸ÈÆ·ÇÊ·ÈÊ·ËÈ¸ÈÈ¸ËÇ³ÈÇ¹ÊÊµËÅµÅÆ·ÈÈ³ÆÈ·ÇÈ¸ÈÉ´ÇÉ¹ÊÇ¸ÇÆ¶ÈÆµÅÄµÈÃ±ÃÃ³ÆÁ³ÈÄ´ÈÅ²ÅÁ°ÄÃµÃÅµÈÆ³ÆÂ¶ÇÆ²ÅÆ·ÃÃ¶ÈÃµÆÃ³ÆÄ³ÆÈ·ÄÁ³ÅÅ³ÆÃ´ÇÃµÂÃ²ÆÈµÆÁ³ÄÃ³ÆÁ²ÇÁ°ÅÃ²Ã¿°ÂÃ³ÃÁ±ÂÁ´ÆÂ°ÃÀ®Á¾¬ÄÂ²ÃÀ±ÃÁ´ÃÀ®Á»¬¿Á¯Á½¬Â¾®Ä¾°Á½°Á¿³ÃÀ¯Ã½¯ÃÀ«¾»¬À¿¯¼¾­À¼®¾Á¬ÁÁ®Ã½­¾»¬¾¿­¿·¬Â½¯Á¾¬Â¹®¾¾¬¾¼®À½­¿»­À¿«Á¾®½¾¬¾¾­Á½¬½»¬¾»§½½«¾º®»¼ª¾º¬½¹¬¼¿«À¸©¿¸ª¾º¬½»¬¾·«Àºª½½ªÁ·°»¼®¾»¬¾º­½»¬¾»ª¾¸«¾¹§½»«¾ºª»·ª»º«¼·«»¸­½¸¥»µ¨¾»§¹º©»·ª·µ«º·¨¸µ¨¸µ§º·§¼·©·¸«¸µ©½º©»·§ºµ¬··¥¸¶§µ²¥¸·ª·µ¦¹¶¥¸´¨µµ¨¸´¥¸²§··¢·²¤¸·§¸µ¨¸³¤´µ¦¶­¨¸¹®½·¨½·¯¿³¨¿¹¬Á·®À¶«À¹¬¿º­¾»¬½»¬¾»«¾¸­¿»¬À·©¾»¯Ã»®Á¾©Ã·ª¿¸¬¿»¬Á¹°¾º«À»¨¾»¬Â¸¬Ã¼¬Â¹­Áº®Á¾­Á»«À¹¯Â¼¬Ãº­Ä¼­Ã¹°Ã¾¯Ã¾­À¾±Ç»¬Ã¼®Ã¿­Â¾²Á¾­ÃÁ³Ç¾­Ä»¬Ã¼¯Ã¾®Ä¿²Âº²Ã¿±ÆÂ±Â¾°Ä¿±ÆÁ±Æ¿³Æ¾¯ÆÁ¯ÆÂ³ÈÁ¯ÆÂ°Æ¿¯ÃÀ²ÈÁ²Æ¾²ÆÁ²ÇÀ³ÉÃ´Æ¿³ÆÂ²È¿³ÆÀ´ÇÁ³È¾®ÅÁ³ÈÃ³ÉÁµÈÁ³ÈÂ°È¿²ÆÀ°ÈÂ´ÈÂ·ÈÁ³ÉÁ³ÊÅ°ÊÁ³ÆÃ¶ÈÂµËÁ³ÆÁ³ÇÂ°ÇÃ´ÇÂ³ËÃ³ÌÁ¶ÈÅµÉÂ´ÉÃ´ÈÁµÊÅ³ÈÄ·ÈÁ´ÈÄ·ÉÇ´ÌÁµËÃ·ÊÅ¶ÉÃ¹ËÈµÊÆ²ÌÅ·ÈÈ¶ÌÈ¶ÊÆ¸ÊÅ¶ÊÇµÏÇºËÄ·ÉÊ¹ÍÅ¹ÎÆ»ÌÊ·ÍÉºÍÅºÍÈ¼ÍÆºÊÅ¹ÐÊ¹ÍÈºÊÈ¹ÌÆ¸ÏÇ¸ÎÅ¶ÊÆ·ÏÇ·ÊÈ»ÎÉ·ÊÈºÎÈ·ÍÈ»ÑÉ¹ÌÇ¹ÌÇºÌÊ»ÒÈ·ÌÉ»ÏÊ¼ÎÊ»ÎÇ»ÍÉ¸ÏÈ¸ÍÇºÐÈµÎÌºÎÃºÌÊ¾ÓÌ·ÌÉ»ÎÊ»ÐÈ»ÏÆ»ÍÈ¸ÎÇ·ÌÊ¸ÎÉºÎË·ÏÉÀÌÈ·ÑÈ¼ÎÈ¼ÏË¸ÐÎ½ÒÉ»ÍÆ½ÐÐºÓÌ»ÒÌ»ÏÌ½ÐÎºÐÍ¾ÒÌ¼ÐÌ¾ÐÌ¾ÏÊ¾ÒÈ¹ÐÌ»ÑÊ¿ÒÌ¾ÐÌ»ÐÌ½ÐÍ½ÒÌ¿ÐÌ¿ÒÊ¼ÓÌ¾ÒÊ»ÏÉ¿ÎÈºÑÍ¿ÍÌ»ÐÌ¸ÌË½ÐÏ½ÓÊ¹ÑÉ¾ÎÌ»ÒÍ¼ÓÌ¹ÑÌ¾ÓÍ½ÓÌ¼ÐÌ½ÕÊ¹ÑÌ»ÐÍ¿ÓÐ¾ÒÌ»ÏÎ¼ÐÐ¾ÓÍÀÐÊºÒË¾ÓË¼ÒÍÁÐÎ¿ÐÊÁÒÌ¾ÐÐ»ÕÎ¾ÑÎÀÔÐ¼ÒÎ¾ÔÌÀÒÍ¼ÒÍÁÐÎÁÔÎÀÓÏ¾ÒÐÀÓÌ¾ÓÑ¼ÓËÁÐÎÀÒÎ½ÓÊ½ÒÍÀÒÍ¾ÐÐÁÒË¾ÒÑ¼ÑÏ¾ÒÊÁÕÎÁÓÐ¾ÐÐÁÑÎ¾ÒË¼ÒÍ¿ÓÌ¹ÑÌ½ÒÈ¼ÎÐ¾ÓÐ¿ÔÎ½ÓÌÁÕÏ¾ÔÐ½ÒÏÁÕÎÀÒÐ¿ÒÐÁÒÍ¾ÕÓÀÓÎ¾ÒÐ¿×ÐÁÓÏÀÕÐÁÒÍÂÓÐÃÓÐ¿ÓÒ¾ÑÒÂÏÏ¾ÒÐ¼ÎÑÀÐÒÁÓÎÁÎÌ¾ÍÈºÊÆ¸Ã»­¹¦{zod`_xf[zfYt_[u_`qb]r`]nWYqb]of]ti_uddr`Yo``rg_t``ob]ob_t]UoS[l[`o_Wq`Yl`YiWQoSQlSUl[[n_Yq_bkgYtnirubuibx[]lYSq[[o_Un]_lbWn_SoSYl]Ul][o]]n]Ul]Uq`[od`rb]uf[ug]ob[tYSq[Uk[YqUQr]bo][q`]rb]r`Wn]Uq[[o][u_[oWYl_[n_Sn[[o`Yt[[o`[l__of`tb`xqi~xn¢¨ ­µ­·»³½Á¸ÁÇ¾ÈÌ¾ÌÍÀÌÏ½ÑÌ¾ÎÎ¾ÒÒÁÓÎ¾ÏÐ¾ÒÐÁÒÏ¿ÓÑ¾ÒÒ¾ÒÑ¿ÒÒ¾ÕÏÀÓÒÁÐÒÂÓÐÁÑÎÀ×Ï»ÑÐÂÕÐ¾ÒÍÀÑÎÁÔÎ¿ÒÏÁÓÏÀÓÎÀÒÍ»ÒÑÁÔÏ¼ÒÍÁÒÎÁÎÎ¿ÕÍÀÒÐÁÒÐÀÐÏ¼ÐÏÁÐÎ¿ÒÎ¾ÐÎÀÏÎ¾ÐÎÀÐÏÁÑÎ¼ÑÎÀÒÊÁÑÐ¾ÒÌ¾ÑË¼ÐÍ¾ÑÎ¾ÏË¿ÐËÀÒÌ¾ÐÌÁÒÌÁÐÍÀÐÍ¿ÎÐ¾ÒÏ¾ÓËÁÐÎ½ÑÍ¾ÒÌ¾ÐÏºÎÌ¾ÐË¼ÐÍ¼ÒÌ¾ÒÌ½ÐÌ¾ÐÍÁÒÉ¹ÓÊ¿ÎÍÀÓÌ¾ÐÍ¾ÌÈºÎÉ»ÌÊ½ÐÊ¾ÎÉ»ÌÌ»ÎÊ½ÎË»ÐÌ¾ÌÈ¾ÎÌ½ÒÈ»ÎÈ½ÏË»ÎÉ¼ÐÊ½ÎÊºÊÊ»ÐÈ½ÊÊ»ÌÈ»ÌÉ¼ÍÉºÎÈ¼ÎÈ¼ÐÎ¼ÍË»ÌÇ»ÍÊºÎÉ¼ËÇ¹ÌÅ¸ÊÌ»ÏÊ¹ÍÉ½ÍÉºÎÇ¾ÐÈ»ÊÉ¹ÎÇ¹ÌÁ·ÊÈºÈÈ¸ÊÆ¹ÊÅºÊÈ·ÊÅ¼ÊÇºËÅ¶ËÅ¹ÈÈ¹ÈÅ¸ÊÅ»ÈÇºÊÅ·ÌÅ¸ÉÃ¶ÈÈ¸ËÈ·ÌÃ¸ÊÈ¹ËÆ³ÌÃ¸ÈÆ¶ËÁºÈÃ»ËÇ¶ÌÆ¸ÊÄ¸ÈÆ¶ÌÄ·ÊÆ·ÅÃ·ËÅ³ÊÁ¶ÆÁ¶ÆÄ´ÈÀ¶ÆÃ¶ÈÁ²Æ¾´ÆÅµÆÂ¶ÇÁ²ÇÁ³ÆÀ³ÅÁ³ÆÁ³Å¾³ÄÁµÇÀ´Æ¿²È¾³ÇÀ³Ç¾´Ã¾²Ã¾³ÁÀ³ÈÁ´Æ»¯Â½±Ã¾³ÀÀ³Å½³ÅÁ³Ä¾±Â¾²ÁÁ³ÅÀ³Á¿´ÂÁ²Ä½µÃ¼²Á¾°Á½´À½°Ã¼¯Ã¾°Ã¾³Á¼®Â¼®Á½±ÁÁ²Á»°Ã»²¾¼³Á¿°Ã»³Â¾³Á¿¯Ã¹³Á¼³Â½³Ä¼²Â¾³Á½®À»³À»®Â»³Ãº¬Â·¯¾¼±Á¹®Á·­Àº­¿·®¿¹­½·®À¹­À·®¿·¬À»ª¿¹¬½·­¾º¬¿·¯½»¬À¹®¾º¯¿µ°º·«¼»¯¾µª½·©»³¯Á¹¬¾¸©¼µ¬¼¸¬»´¨¾´«¾³¬»·¬ºµ§¹¶¬»·©»°¤´´¥ºµ¤·¸¤»¶¥¹´£½¸¥»¸§»¸¨¾µ¦ºº¦¹·¨»¸¦½¶¦»º¨ºº§¼¶¥½º¥»¸¨½¹§¾µ§¹¸§»¸§»ºª¸·¨¼·§»»©»¹©¾¼¦¾¹©»»ª¾¼¬¾½§½¹§½º¬¾»¬»»¬½¾«Ã»©¾¼¬¼¿¬¿»§¾»¬¾¾¬¾¾«¾½¬¿º«À¾ªÀ»¬¾¼ªÁ¿­¿»­¾Á©À¾«Á¾®Â¾®Ã½®Ã¾«Á½¬Ä¿¬ÁÀ¬Á¾¬Á¿¬Á¾¯Á¾¬Á¾¬Á¿®À½­Ã»®ÄÀ¬ÁÁ¯ÀÁ¬ÂÃ®ÃÁ«Ã¿®ÁÀ«Ä½ª¾¾¬ÁÀ®ÁÁ®Ã¾¯ÅÁ¯ÃÁ®Ä¾­ÃÁ°ÆÀ«Ã¼¬ÅÁ®Æ¿°ÅÁ®Æ¾±ÂÁ±ÆÁ°ÃÂ­ÄÁ«ÅÃ®ÇÅ®ÆÁ´ÇÁ²ÆÃ³ÂÃ®ÅÃµÃ¿¬ÄÃ²ÆÆ°ÆÃ³ÇÂ²ÇÁ°ÆÃ³ÆÃ²ÄÂ¯ÃÄ²ÆÆ²ÉÄ²ÄÃ°ÉÆ±ÆÂ³ÇÂ¯ÅÇ³ÈÆ³ÊÄ´ÆÆ·ÇÄ³ÉÉ·ÈÅ³ÈÄ³ÇÆ³ÇÆ´ÇÅ¶ÊÆ´ÇÇ³ÉÈ´ÇÆµÈÁ³ÈÆ´ËÄ±ÄÄ¸ÇÇ³ÈÆ´ÉÉ´ÊÃ²ËÈµÈÅµÈÉ¶ËÈµËÆ¸ÈÅ·ÇÈ³ËÊ¶ÈÆ·ËÆµÊÊµÊÈ·ÈÆ´ÊÃ·ÊÈ¶ÈÈµÉÈ³ÇËµÊÉ³ÊÆ´ËÇ·ÇÈ·ÌÅ´ÈÆ¶ÊË´ÌÊ·ÈÈ·ÊÈ³ÊÉµÊÈ³ËÈºÎÉ¶ÊÈ¶ÊÉ·ÌÉ´ËÊ¹ÌÈ·ÎÊ¹ÌÊ·ÌÇºÎÊ¸ÊÇ¸ÎÊºÌÉºÎÊ¸ÍÈ·ÊÊ¶ÎÊ¸ÊÊ¶ËÊ¸ÌÌ»ËÈ¼ÌÊ¸ÎÊ·ÊÊºÎÊ¸ÎÈ·ÌÊ·ÊÊ¹ÎÉºÌÉ¸ÊÈ·ÌÌ³ÌÊ¹ÊÊ·ÌÈ¸ËÊµÌÊ¹ÌÌ·ÌÊ¹ÎÊ¸ÌË¹ÎÉºÊÌ·ËÊ»ÍÉºÌÌ¶ÌÈ·ÌÈ¶ÎÌ·ÑÎ»ÎÌµÏË·ÌÉ¸ÎË·ÌÎ»ÌÎ»ÐÎ½ÏË»ÏË¹ÌÎ»ÓË½ÍÌºÎÌ»ÐÊºÍÉ½ÌÌ»ÎÌºÎÌ»ÎÌºÐÍ»ÏÌ¹ÒÏ¾ÎÌ¸ÎÌ·ÌË»ÍÎ¶ÌÍ¸ÌË¸ÌÊ»ÐÎ»ÏÎ¾ÏÌ»ÐÎºÒÎ½ÐÎ»ÏÊ»ÏÎºÎÐ»ÐÎ»ËÌºÌÌ·ÊÎºÌÌ·ÎÎ»ÐÎºÎÎ»ÏÌ¸ÌÌ·ÏÌ»ÍÎ¼ÏÌ»ÐÎ¸ÍË¸ÐÏ·ÌÌ»ÐÑºÌÒºËÎ½ÒÌºÌÊ»ÊÈ·ÉÌ¸ÈÎ·ËÎ»ÇÌ»ÈÐºÈÍºÊÊ»ÇÍ¸ÇÈ·ÄÁ°¾£¬{tufwd|i]w`Su`Oo_Qg]MndQi]Qk]Ul_Mk_Wif[kdYodWlb[i`Sn`MlYSfYQg]OkYMdYMg]Qd]Sb[Uf_Mb[SgYQdUKdYO`[Kf[Mg`UgiUggSkWOfYMg[Qi]Ob]QgYKf[Ul`Ug`Ui`Md]Sf]Ql`MgYSd[MiYMd`Ud`QkdUldQkdUq]Ml]OgbQl`MnYQnWMf[Mf_MgUKgYKdYIgWUfbWk]KiUKiYMd[Od[Og_Qi[OgYKg[OddSl`Uod_no[w{nw¡¢´©°¾°ºÊµÃÊ»ÆÊ¹ÌÉ¸ÊÌ¹ÈÎ¸ÎÊ¸ÊÊ·ÈÎ½ÏÌ»ÏÏ»ÎÎ¿ÎÏºÎÌ»ÏÓ½ÐÒ»ÏÌ½ÎÎ¾ÎÏ½ÑÏ½ÍÌ½ÍÐ»ÏÍ»ÎÌºÏÏ»ÎÍ·ÎÎ¹ÏËºÍÍ»ËÌ¹ÎÎ»ÌÊºÌÉ¸ÌÎºÍÌ½ÎÍ¾ÌÌ»ÐÌ»ÎÎ»ËÌ»ÏÎ»ÍËºÍÌ¼ÌÎ»ÐÊºÊË¸ÎÌ¹ÌÌ»ÍËºÌÊ¸ÎÏ·ÊË½ÉÌ¾ÎÊ»ÌÌ¸ÊÌ»ÌÍ»ÎÊºÊÌ¸ÍÊ»ËÊºÈÊ»ÍÎ¹ÌË¾ÍÊ¹ËÊ¸ÎÊºÊÊ»ÌÌ¹ÊËºÌÊ½ÌÌ·ÊÈ»ÌÌ»ÊË½ÎÈ»ÊÊ½ÉÍ¹ËÊ¸ËÊ¸ÊÊ¹ÊÈ·ÊÇ·ÈÊ¸ÌÈ¹ÊÈ¶ÊÍ¼ÌË·ÎÈ·ÉÉ¸ÉÈ¸ËË¶ËÈºÇÊ¹ÈÊ¹ÉÇºËÈ¸ÈÉ»ÈÇ»ÊÍ·ÊÄ³ÈÅµËÉ¸ËÈ¶ÈÇ´ÈÇ³ÊÊ·ÊÄ·ÆÈ·ÈÊ¶ÇÉºÈÈ·ÉÊ´ÇÆ·ÅÈ·ÈÆ·ÈÅµÈÅ´ÇÆ·ÇÆ°ÈÃ·ÈÄ±ÇÄ¶ÇÅ·ÇÃ²ÈÅ±ÄÇµÁÄ´ÇÆ°ÇÂ³ÆÅ³ÈÄ³ÄÆ¶ÄÂ³ÇÄ²ÅÃ³ÆÄ³ÂÆ³ÆÃ³ÆÃ¶ÅÆ°ÆÅ´ÃÄ²ÆÃ³ÅÃµÇÂ²ÅÅ±ÄÄµÅÁ³ÄÄ¬ÅÃ¯ÄÃ±ÄÂ²ÆÃ°ÂÁ³ÀÂ±Ä¿«¾¾°ÁÃ«Ä¾¯Â¿°Á¿¯¾Á®Â¿¯ÂÀ¯ÃÁ²Á¾®À¾°ÁÁªÀ½°Á¾°¾Á®À¿®¾¾±ÁÀ°Á¾¬À¾®Á¾­¿À°Â½®Àº­Á¾«À¼®¾¾°¾À°Á½¬½À­Á»©½½¬¾º°¾½«½½¬¾»­¼¾­À»®½½­¾¼«½½«¾¼«¾½«»»¬»¼¬¾¿ª½»¬»»¯¿º©¾½«½¹¬¿¾«¿¼®»·«¾¹¬¼¾«½º¬¼»«¾½¨Á¸«¸º¬»»¨¾¶©¹»ª»º«»»­ºº¨º»©½·¬º¸®¼ºªº·§··©¹·©»·§º¹©¹¶ª¹º§··«·¶©¸¶¨»µ§»·§»¶§·²¤¹·¦··©¸·§··§¶µ¦»µ¥·µ§¹´¤¶´¨¶´¥·³£¸µ£µ³¨·²©¸·¬Àµ¦¿»¬¼¶¬¾»­Àº¬¾µªÁ¹¬À»¬Á·©À¶«½»¬À¼¬Á¸«½¼ªÀ·©¿º«¾º­ÁºªÁ¹¬¾»¬Á¹ªÁ¹¬¾À«Â»®À¼¬Ã¸¬Á½¬Â»¯Á¼¬Ä¹®Áº¬¾»­Ã¾­Ã»¬Á»®Æ¾¬Ã¾®Ã»°Ä¾®ÁÁ­Ã»¯ÇÁ®Ã¾¯Ã¼°ÄÁ²Ä»­ÃÀ¯Ä¿¯ÃÀ°È½­ÅÁ°Â¿®ÆÁ³ÅÁ³Å¾¯Æ¿¯¿Á²ÅÁ¯ÅÁ¯Æ¿´ÄÂ³È¿³Â¾³ÈÂ³ÉÂ®Æ¿´ÊÁ¯ÅÁ¯ÇÀ²ÉÁ³Æ¿³ÆÂ³ÇÃ³ÆÁ±Æ¿²ÉÁ±ÊÀ´Ì¾³ÆÃ²ÇÂµÊÁµÈÂ²ÊÂ²Ê¿±ÈÀ´ÆÂ³ÉÃ³ÈÃ³ÊÂ²ÈÁ³ÅÁµÇÃ³ÉÄµÉÁ´ÈÅµÊÃ·ÊÁ¶ÊÇ·ÊÃµÊÇ·ÈÃ³ËÄ·ÈÅ³ÉÅµËÆ¶ÊÃ¶ÊÃ·ÍÄµÌÅµÌÆ¶ÊÄ³ÊÇ³ËÃ³ÌÆ·ÌÆµÊÅµÊÊ¸ÏÈ¹ÍÆ·ÊÇ¶ÌÇ·ÌÇ·ËÆ¹ÌÇ·ÌÇ¹ÌÈ¶ÌÆ¸ÎÇ»ÍÊ¹ÎÈ¹ÌÈ¸ÐË¾ÐÈ¹ÌÆ¸ËÊºËÈ¶ÎÊ¼ÊÈ¸ÐÇ»ÐÇºÎÆ¹ÐÈ¹ÏÊ·ÎÆ¼ÍÈºÐÊºÐÈ»ÌÉ»ÑÊºÏÈ¹ÌÆºÎÊ¹ÎÊºÏÊ»ÎÈ·ÎÌ»ÌÊ½ÒÈ»ÎÈ¹ÌÈ½ÍÌ½ÏÊ¹ÌÇ¹ÎÊ¹ÐÆ»ÎÉ¾ÍË·ÐËºÐÊºÏÊ¼ÎÊ¹ÐÉ¼ÎÊ¼ÑËºÎÈ¼ÐÊ½ÒÍ¾ÒÌ»ÐÈ¾ÒÌ¼ÑÊ»ÒÌºÎÐ»ÒÎ¼ÒÌ¼ÏÌºÐÈºÐÉ¾ÎÍ¾ÓÈ»ÎË¿ÐÎºÒÌ½ÐÌ¿ÐÊ¼ÒÌ»ÑÌ»ÒË¹ÑÎ¼ÐÉºÒÈ½ÑÎ»ÐÈ¼ÐÍ»ÐÎ¼ÎÈ»ÑÊ»ÍÍ¼ÑÎ»ÑÊ¼ÒÌ»ÒË¼ÐÎ»ÒÌ»ÒË»ÏÌ½ÒÌ»ÒË»ÓÎ¿ÒÎ¾ÓÎ»ÒÌ¼ÖÌ¾ÔÍ½ÓÎ½ÐÌÀÕÌ»ÔÍ¾ÒÎ»ÐÌ¾ÕÌ»ÒÏ»ÐÐÁÓÌ»ÎË¾ÑÑ¾ÓÐÁÓÐ¾ÒÏÀÕÌÁÖÏÀÕÐÀÓÎ½ÓÏ»ÒÏ¾ÓÐºÓÌÁÑÎÁÒÎ¾ÕÌ¾ÑÌ¿ÕÒ¼ÓÒ¾ÒÒÁÒÑ¾ÓÎÁÖÏÀÑÐÁÕÍÀÑÒ¾ÓÐ½ÒÎ¿ÒÌ»ÑÍÁÕÎÁÒÏ»ÐÎ¾ÓÐ¾ÓÒ¿ÒÌ¿ÒÐ¾ÓÎÀÒÏ¿ÐÍ¾ÐÐ¼ÓÒÀÓÒÀÑÐÁÒÐ¾ÎÊºËÈµÆÂµÃÁ¶ÅÊ»ÃÍ¼ÈÍ»ÈÅ»Ã¾µÁÂµ¾»±¹«°~q`gddd~k_xgdxf]tb[t``ri]qb[qbYq][rdUu[]ofbrf_r_bu]Yq`YqbWoU_qYQn`Wq[[nW[q_[qWUk[Wr[Sl_Wk_]kWQo[UoWWnbSll_q`[r_QoSSl[Ynb]o_[nYYqWOk]Un[[r`YrdSrY_obWtbUoUUk[Uq[]nk[ngbqi]tk`tgdtb]r_]lb[tb]q_Wo`[ob[r[YqQWkYQo[SiW[k_Wn][nUYoWSk]WqY[qgYt_[o[Uo`Yo]Wo]Yqb_wi]ui`zgfwn{©¢¬»¯ºÆºÁÅ·ÆÊ¹ÈÉ¾ÉË»ÍÄ¹ÍÍ¼ÌÐ¿ÒÐ¾ÎÍ¿ÓÏÃÓÐÀÒÏÂÔÏÁÒÏÀÒÓÁÓÐÃÕÐÂÐÎÁÐÍÁÓÒ¾ÐÎ¾ÕÐÁÒÐÂÎÍÁÒÎÂÒÌ¾ÖÍ¼ÑÎÀÏÐ¾ÏÍ¿ÐÏÁÑÏ»ÒÑÁÔÌ¾ÐÍ¾ÕÐ¾ÒÍ¾ÐÎ»ÓÒ¾ÓËÀÑÎ»ÒÍ½ÒË¾ÐÒ¿ÑÍ»ÎÌ¿ÎÎ¾ÎÏÁÕÌ¼ÎÍ½ÏÌÁÓÎ½ÏÌ¾ÒÌÀÐÍ¼ÏÐÀÏÎ¼ÐÎ¼ÎÎÀÏÍÁÒÌ¾ÐÊ¾ÐÐ¾ÐÎÀÏÊ¿ÐË¾ÒÐÀÓÏÀÑÌ¿ÒÐ»ÐÌ¾ÐÎ¾ÐÌ¾ÑË½ÐÊ¼ÎÏ¹ÎÊ¹ÎÊ½ÐËÀÑÎ¼ÎÈ½ËÊ¿ÐÌ¾ÐÊ¼ÍÐ¾ÑÌ¼ÐÌ¼ÍÌÁÐÊ»ÐËºÍÌ¾ÎÊ»ÏÊ½ÎÈ¾ÌÉ¼ËÈ»ÊÊ¼ÑÊºÌÍ¹ÎÊ»ÍÈ»ÌÉºÌÈ»ÍÈ»ÊÌ¹ÍÈ¼ÊÌ·ÍÈ¹ÊÈ¼ÍÊ¿ÐÌ½ÍÈ»ÐÈ¹ÌÉ¶ÊÉºÌÉ»ÊÈºÌÈ·ÉÇ»ÊÊ¸ÍÅ·ÊÆ¼ÊÉµËÊºÊÆ¹ËÄºÎÃ¸ÇÁ´ÊÅµÌÈµÊÈ»ÊÇ·ÊÈ·ËÂºÊÆ»ÎÇ¸ËÅ·ÊÅ³ÆÆ·ÌÄ¸ÈÂ·ÊÅ·ÊÈ¶ÉÅ¹ÌÃ¶ÈÅ¶ÆÆ»ÌÃ¶ËÃ·ÅÁ·ÈÆ¹ÈÅ´ÆÂ·ÇÂ´ÈÂ´ÈÂ´ÆÃµÈ¿¶ÈÄµÈÃ³ÆÁ´Ç¾³Å¿·ÈÂ·Æ¿±ÄÀ´ÄÃ³Æ¿³ÆÁ³ÃÂ³Æ¿µÁÀ°Æ¼´Å¿³Ã½±Å¾³ÇÀ±Å»³ÃÀ±ÇÂ³Æ¼¯ÄÀ´Å¿±Å½³Â½³Ä½²Ã½³ÃÀ°Á¾®Â»³ÃÁ³Á½¯Å½±Â»±ÁÀ³Æ¿±Â¼³Ã¼°Ä¿®Á»³Ä»°Æ¾±Á»³Ã¾¬Ä»¯À¼°À»³Â»´¿½±¿½®Ã¼®¾½¯À»²Ã¾¯Á»³Á¾°À»¬Á¹¯¿¼¯¿¹¯¾¹±¾¸¯¾»­Á½®¼¼³¾¹®Ã»¬»»ª¾»¬¼·¬¿·¬¾¹°Á·®½º¬¿¹ª¾»«»µ¬»³ª»·«¾µ«º´©ºµ¬»·¨½¸¬»¶©½µ¨¹³¬¼¸¨¾µ«»¶©»·«¼¸«»³«¹¬¥³·£½´¡·¶©º·¤¸·§¼¸§¿¸¦º·§½·§¹¶¥º¶§»º¥»¸§º·§½¸¦»·©¹·£º·ª¾·¸¸©½¶ª¾·¥½»§½·ª¹¸§¾¸¨»º¤¾»¨»»§¼»§»»ª¾½©¾¼©½»ª¾»ª»·¬¾¾©¾¾§¿»¬½½¨»»«Á¹«¾½ª¾¼©Áºª¼»¬¾¾«¾»©À½«À½®¾»©Á»¬Á¼¬¾½«¾¾«Ã¾­Â¼­Á»­¾½®Å½¬¿¾«À¾«À¾®Â»¬Ã¾¬ÃÀ­Á¿®Â½­ÁÀ¨Á¿¬Ã¾­Ã¾®Â½ªÃ¾¬Á¾°Æ¾«Ã¾°ÁÁ­ÁÁ®Ä¾¬Ã¾­Ä¿­ÃÂ­Ã¾¬ÃÁ«Ã¾¯ÂÀ­ÃÁ­ÇÀ°Ã½¯ÆÄ­Ä¿®ÅÂ®ÄÁ²ÆÃ°ÆÁ²ÄÃ®ÅÁ³ÄÃ²ÆÃ°ÄÁ³ÄÁ³ÄÁ®ÆÃ°ÂÂ²ÃÃ±ÈÃ°ÃÃ°ÆÃ¯ÆÅ°ÈÃ±ÄÃ³ÆÅ²ÆÅ¯ÆÃ³ÅÁ®ÆÂ³ÇÄ´ÆÄ²ÇÂ²ÇÄ´ÇÃ±ÇÇ±ÈÆ¶ÈÄ³ÊÈ³ÆÆ³ÊÇ²ÇÆ³ËÅ¶ÈÈµÊÆµÈÃ´ÇÆ³ÇÇµÊÄ·ÇÇ³ÈÆ³ÊÇ´ÅÉ´ÊÄ´ÉÈµÈÄ³ÆÇµÇÉ·ÈÃ¶ÊÉµÈÇ·ÊÅµÈÉ¶ÈÆ´ÊÈµÊÌµÌÉ·ÌÉ·ÇÊ³ÊÄ·ÈÅµÉÇ¶ÊÆ³ÉÇµÌÆ¸ÊÈ´ÊÈ´ËÈ¶ÉÈµÊÆ´ÉÇ¹ËÈ´ÎÈ³ËËºÊÈ¸ÊÉ¶ÌÉºÊÊ¶ÌÊ¸ËÇ´ÊÆ¹ÊËºÌÎ·ÌÌ³ÇÈ¶ÎÉ·ÌÉ¸ÎÊ¶ÌÊµÈËµÊÊµÎÊµÌÊ·ÌÌ·ÊÌ¹ÌÈ»ÍÊ¹ÌÈµËÊ¹ÌË¶ÎÇ¸ÊÌ·ÈÉ¸ËÊ·ÌÉ¶ÉÈ»ÎÎ·ÌÈ»ÌÈ¸ÌÌµÈÊ·ÌÊ¶ËÌ¸ÌÈºÌÊ·ÒÊ·ÌÉ¶ÍÉ·ËÊµÎÊ·ÌË·ÎÎµÎÎ·ÍÌºËÍ»ÏÊ·ÌÊºÒÎ»ÏÏ¸ÏË¼ÎÎ·ÐÎ¶ÍÇ»ÍÎ»ÐÍ»ÐÌ»ÍË¸ÌÎ»ÌÉ¹ÎÐ»ÓÌºÐÌ¾ÐÊ»ÍÊ»ÍÌ¾ÊÎ»ÐÎ»ÒÌ¸ÎÌºÍÏ¹ÎÊºÌÏ»ÎÌ¹ÐÎ¸ÑÎ»ÐÎ¼ÐÎ»ÎÍ¼ÎÎ»ÏÌ»ÎÍ¾ÐÌ»ÏÐ¼ÐÌºÎÊ»ÏÐ»ÎÎ»ËÐºÌÍ»ÐÍºÍÎ¹ÎÎ¸ÎÍ»ÏÑ¸ÐÎ»ÎÌ¶ÍÌ»ÎÐ¹ÎÌ¾ÎÍ»ËÏ¸ÐÌ·ËÂ·É»°Ã»¬¼½§ºµ ·³£µ»¬³»¤±¤¬¢¡²¥r`gW|]Wq[Ql`Oq`Uld]lkWodYl]UnbSkfQk_SldUibQnkWk`Wg[SgYQdYQk_Kd[Qd`YkfQlbSkWQn]Kg[Kf_Od`Qi]Oi_Qi[OfWIfWSd]QgbQk[Od]IgYKi`Qb_Ul[Q`UQd_Ig`Kg[Mi]UifWl[UgYSlYMiYKgWKg]Qf_Wf`OlbWkdUnfWgbUngUkbYldUg]Sg_Md_Si_QgWOdSOgYOg[Mf`Ub[Ol]Qd]Qb`Mk[Of`WffQiYOdYUf]Kk]MkYSk]Qk`QodUng]wn]t¬§·¨®½®±¾²»¿«½Â²ÀÆ²ÃÇ·ÃÊºËÎ¸ÊÍ½ÎÑ¾ÎÐ»ÊÌ½ÏÐ¾ÎÐ»ËÏ¾ÍÎ»ÏÐ»ÏÌ½ÐÌºÌÎ¼ÎÎ¾ÐÎ»ÍËºÐÐ»ÎÐ¹ÍÌ¼ÒÍ»ÍË·ÌÎºÌÏ¸ÐÌºÌË¸ÊÌ·ÐÎ¾ÌÊ¼ËÌ¼ÎÌ¼ÎÌ»ÌÎ½ÐÍ¸ÍÌ¸ÎÍºÎË»ÎÊºËË»ÎÌ»ËÌ»ÏÎ¸ÌÎºÌÉ¸ÌÌ¼ÌÌ¸ÌË»ÌË¸ÌÊ»ÎÉ·ËÌ»ÊÊ·ÌÊ¹ËÊ¸ËË¹ÍÌ¹ÊÈ»ÉÉ·ÊË»ÌÌ»ÌÍ»ÌÊ»ÎÊ»ÌÌ¸ÌÊ»ÍÈ¸ÍÉ·ÉÊ¼ÍÊ»ÊÈ»ÊË·ÌÉ³ËÊºÊÊ¸ÊÊ·ÌÊ¹ÊÊºÊÅ·ÉÇ»ÌË¹ÌÊ·ÊÆºÊÊ¸ÊÉ·ÇÈ¸ÇÊ¹ÌÈ»ËÊ·ÊÈ¶ÊÈ·ÉÇ·ÈÇ¶ÉÈ¶ÈÈ¸ÊÌ¸ÊÉ´ËÆ·ÆÈ·ÈÈ´ÌÇ·ÃÃ·ÆÉ³ÈÇ´ÈÆ¸ÊÊ³ÆÄµÈÄ´ÅÇ²ÈÇ·ÈÇµÊÊ·ÆÅ¶ÆÆ´ÈÇ³ÈÇ´ÈÉµÈÃµÄÆµÅÅ·ÇÃ³ÆÃ¯ÆÃ³ÅÃ³ÃÁ²ÇÄ³ÄÆµÅÄ´ÈÂ³ÆÃ³ÆÆ´ÈÃ¶ÆÅ´ÆÂ²ÅÁ³ÅÅ´ÆÅ³ÇÄ²ÆÂ±ÃÄ·ÈÁ³ÄÃ´ÇÃ³ÅÆ°ÄÃ³ÁÃ³ÃÀ³ÃÃ­ÁÄ³ÁÃ¯ÁÀ²¿Á±ÆÄ²ÁÁ²Ä¿±ÄÃ°ÄÀ®ÃÀ®Â¿²Ã¾±Á¿®¾¿°ÅÁ®¾¾®ÀÀ¬Á¾­¿¼­¾À®Á¾¬Á¿¬À½¬À¸¬Á¿±Á¼«Ã½¬¿¾¬Â¾¯¿»ª¾½®½½¬À½¬À¼­¾º¬À»¬¾¼¬¾»¬¾¾¬¾»«½º®¾½¬Á¿¬¾¾®¾»¯¾»«¾»®¾½¬À¾®¾À®¾»©½¼©¾»¬½º«»»¬¾»©½º¬¼»«»»ªÀ»¬½½ª¾»«¾·¬º¸­½¸¬¹¸ª»·¬»»­»µ«»·ª»º«º»¬»³«º·«¼·©¸º©¼·¦¹¶«¸µ«¸º§»·«¹·«»·¥¸µª¼µ¥··¦¸·©¹¶¦··¥··¤¸´¨²·§¹µ§¸¶¦·³¤·µ¦·³§¸²ª·³§µ³¦µ²¨»¸¬¾¶©Àº«¿¹«Á·¨Á¹­¿º¬¿¶­½¹­Á¸¬Áµ¨¿¼­¾»«À¹«Á·®À»«¿¹­À¸­Á¼­À»­½º®¿»©Áº¬¾¹¯Âº«Â»³Àº¬Á»­À¿«Á½°À»¬Å¼¯Áº¬Â¾®Á¼­Á¹­Ã¾¬ÃÀ±Ã¾³Â»¬Â½±Å¼²Ã½®Ã¾¯ÆÁ®Â¾¯À»³Æ¼¯ÃÁ­ÅÁ³Æ»¯À¾®Ä¿³Æ¿³ÃÀ­Ã¿²ÅÀ®Æ½¯Å¼³Â¾¯ÆÁ³ÃÀ²É¾¯ÇÀ±ÆÂ²ÈÁ²Ç¿­Æ¾´ÆÁ­Ç¿°Ç¿²Ç¾²È¿³ÆÁ²ÆÂ®Æ¾¯ÅÃ¯ÈÁ³ÆÁ±ÇÀµÆÁ²ÊÂ³ÈÀ´ÊÁ´ÈÄ±ÈÀ´ÊÃ³ÆÁ³ÈÁµÊÁ´ËÃ²ÈÀµÇÂ´ÈÁ³ÈÃ¶ÈÂ¹ÈÆ³ÌÅ·ÇÄ¶ÇÅ³ÍÃ·ËÃ·ÊÄ²ËÃ·ÈÅ¶ËÃ¶ÊÅ³ÈÂ¸ÊÆ·ÌÃ´ÊÃ¶ÇÅ¶ÊÆ´ÊÈµÊÅ¹ÊÆµÊÅ¹ÎÇ·ÌÃ´ÈÆµËÆ¶ÌÆ¶ÌÆ¶ÌÈ¹ÌÉ¹ÎÇ´ÍÆ·ÌÆ³ÊÈºÍÇ½ËÉºÍÉ¹ËÇ·ÌÈ¸ÌÈ·ÌÆ·ÎÈ·ÌÊ¶ÍÈ»ÍÅºËÈ·ÎÇºÌË»ÍÆ¸ÎÇ¹ÌÅ¹ÊÈ¹ÌÇ¸ÌÉ»ÍÌºÎÈ¸ÏÉ¹ÎÊ¸ÏÊ¹ÏÊ»ÌÇ¸ËÈ»ÌÇ·ÐÈµÑÊ¸ÎÈ»ÐÌ½ÍÌ»ÎÇºÌÈ¼ÍË¹ÎÊ»ÐÊ»ÏÉ¾ÐÉ¹ÑË¼ÎË¹ÐË¸ÐÌ¼ÏË¸ÒÊ½ÑÌ¾ÐÌ»ÓÊ»ÎÊ»ÎÍ¹ÐÎ»ÕÊ´ÒÏ¾ÍÌºÐÎ½ÒÉ»ÏË¹ÐË½ÒÍ½ÐÌ½ÕÌ¼ÐÊÀÎÊ»ÒÊ»ÐË»ÒÐºÎÌ½ÑË¸ÌÇ¹ÐÊ»ÒÌ¿ÎÊ»ÑÌºÎÐ½ÐÊ»ÒËºÏÊ¹ÐÌ½ÒÊ¼ÑÊ»ËÍ»ÒÍ¾ÑÌ½ÒÍ¼ÏË¼ÏË»ÐË¿ÔÐ¾ÐÌ»ÒÏÀÒÏ»ÓÌ¼ÒË¾ÓÑÀÒË½ÖÍÁÒÍ½ÓÎ¾ÐÌ»ÕÎ½ÓÍ½ÓÏÂÓÐ½ÓÍ»ÍÎ¼ÐÐ½ÓÍ¾ÕÐÀÒÊ¿ÑÐ¼ÕÐ»ÓÎÁÔÍÀÕÎ¸ÏÏÁÖÎÀÒÐ»ÑÑÁÓÍ¿ÒÒ¾ÓÎÂÓÒ¾ÒÐ¿ÒÎ¾ÒÑ½ÒÐÀÕÒ¾ÓÑ¾ÔÐ¼ÒÎ½ÐÐ½ÒÐ½ÓÌ¿ÑÑ¿ÒÐ¿ÒÏ¾ÒÒÁÓÎÀÕÎ¾ÖÐÂÒÏ½ÓÍ¿ÒÐÁÑÍÀÕÎ¿ÓÍÂÑÒ»ÒÉ»ÍÄ·ÅÂª¾··¡«£§£xrzzwwndd[{`]u[YtbWu`Yoqbxi`xibr[]rfbtd]qg`qi`ub_t`_o[WoYWrWWlWUq][ogbniftngubbt__r]Yr_Wn`_ofYu`]u][nbUnUUn[Wlb[o[SoSUk[Un_Wn_]kf]o`Yi`YoiSqg[tg[qnbox]wqiqubwd_w_YnYQn]Sn`Uob[obYo`Srb]n`QrbYn]`o_YoWWo[Yn]Yq[YlYWi_Yo_OoU]o`[n[YtbYnb_ubUt_Wn_]of]tbYo__n]YqbWt]Yn`[o]]od]r`_ribxnl¥ ©¬£«¸¨·º¬ºÃ¶ÁÇºÂÈ·ÍÊ½ÍÎ¾ÐÒ¾ÕÐ¼ÑÏ¿ÒÒ¿ÒÐÂÖÐ¿ÕÐÁÒÐÃÒÏÁÓÍ¾ÐÍ¾ÓÐ¾ÐÎ¾ÓÍÃÐÒ¿ÓÍÁÒÏ¿ÒÎ¿ÒÍ¿ÐÌ¾ÓÏ¾ÏÐ¾ÒÏ¿ÐÏ»ÐÎ¾ÐÍÃÒÊ½ÕÍ½ÐÒÁÓÍÁÑÎÁÎÌ»ÎÌ¼ÑÐ¾ÎÎ¾ÐÍ¾ÑÍ½ÎÎ»ÓÏÀÐÍ¾ÒÍ¿ÍÏ½ÕÎ¼ÒÌ¿ÐÎÁÒÍ¿ÑÍ¼ÎÌ¼ÑÒ½ÑÐÁÓÎÁÓÎ»ÑÍ½ÐÌ¾ÌÌ¼ÒÎ»ÐÏ¾ÒÎ¼ÐÌ¾ÒÎ¼ÏÌ½ÏÎÀÐÌ½ÓÍÁÐÈ¾ÐÌºÏÎÀÒÌ»ÒÌ¾ÒÊ¾ÎÊ¼ÏÇ»ÎË¼ÐË»ÒÌºÎË»ÌÌ¼ÒÊ¼ÐÊ¿ÑÌ¼ÍÊ»ÊÊ¾ÍÊ»ÐÊ»ÎË¼ÍÈºÏÆ»ÍÇ»ÌÊºÌÌºÌÊ¿ÎÈ»ÎÈ»ÌË¹ÌÊ»ÐÈ¹ÌÈ»ÍÆ»ÍÈ·ÏÉ¹ÌÇ»ÌÊµËÈ»ÍÊ»ËÇ¹ÎÈ·ËÇ»ÌÈºÍÈ¹ÊÆ¹ÎÈ·ËÇ¹ÊÆ¸ÊÉ¸ÎÈ¸ÊÅ·ÊÇ¸ÌÆ¸ÊÆ¸ÊÈºÊÆ·ËÆ·ÉÅ¼ÉÇ·ÊÅºÊÄ»ÊÈ·ÌÅ¹ÊÆ¸ÈÉ¸ÌÆµÆÇµÉÆ³ÊÆ¶ÉÃ·ÈÃ³ÊÄ¶ÇÁ¶ËÆ·ÊÅµÇÃ¸ÇÅ·ÈÃ·ÌÀ±ÆÂµÈÂ³ÇÁ·ÆÅ¸ÈÂ¶ÊÁ·ÈÁ·ÊÁ·ÊÃ³ÅÄ¶ÆÃ³ÆÂ³ÃÃ²ÆÁ³ÈÅµÆÁ´ÄÀ³ÄÁ±ÁÂ´Æ¿²Å¼°Ã¾²ÆÀ³Ã¾³Ã»´ÇÁµÂÁ®ÄÀ³Ä½³ÂÁ®Ç¿³Â»²Â¿±Æ¼±Ãº³Æ¾¯Ä¾³Â»°Ã»³Â¾°Á¾°ÂÁ¯Â¿±Å»±Æ¿±Á½®Ã¾´ÁÀ±Ãº­ÂÀµÅ¾°Æ½°Â¼°Á¼³Ã¾³Ã»¯¾¿³¿¾±Á½±Ã»³Á»­Á¼­¾¼¬½¾­Á¹­¾»±¿º¯¿¼ª¾º³Àº²¾»­Àº¯¾¼®¿½¬À´±½¹¯Àº¬¼·ª¼¹¯½·«¾·¬¼·¯¿·©Á´©»·«½»¬¼º¬»·®»µ©½·®½µ¬»·¨À·­»³¦»´°¹¶ª¾±¦»¹§¾µ¬ºµ¬»®¥²´£¸·¥··¦»·£¹¶¦··¦¸µ¨¼·§º¶§»²¤··£º·§¸¸¨º·©¼»¨¸·©¾»¥º·©»¹§¾¸¥»¶¥»¹¦¾¸¨¼·§»·§¹¸¢¹¸¨¾¶¦»·«¾½©½½©¾»ª¿¹§»½ª½»§½»­½»©¾¾­¿»¨»º©¼»ª½ºª¾¹©½¼¬À¸«¼·¦À¾«¾¾¬¾½¬¿»¬¿»§¿¼­¾½«Á½¨¿»ª¾À¯¾½­Á»¬Ã¾¬Á¾«Á»¨Á½¬¿¾°Á½¬ÁÀ¬¿À¬ÀÁ®Á¿¬ÁÀ®Á¼¯À¿¬Ä¾ªÄ¼¬Á»ªÃÁ¬ÃÀ®Ã¾¬Á¾¯Æ½¬ÁÁ¬¿À°ÁÁ­ÃÀ®ÄÀ®ÄÁ®ÄÁ¬Å¿¯Ã¾©Á¾«ÂÁ°ÄÀ¯ÆÀ®ÄÁ³ÁÁ°ÃÄ³ÈÂ³ÅÀ­ÃÃ³ÆÀ²ÅÀ¯ÄÃ¯ÄÁ°ÃÁ±ÄÃ³ÆÁ­ÁÁ®ÄÀ²ÄÁ°ÈÃ²ÃÀ±ÈÃ°ÅÂ³ÃÃ­ÆÄ³ÇÃ°ÇÄ²ÉÃ´ÄÃ²ÅÅ³ÈÃ³ÅÄ²ÄÅ³ÉÆ³ÇÆ²ÆÃ·ÇÇ³ÈÆ°ÆÃ²ÇÆ²ÈÄµÈÈ·ÈÈ³ÇÃ´ÈÄ³ÆÆ²ÌÅ³ÈÆ³ÇÆµÈÆ´ÇÆ¶ÌÄ´ÉÇ²ÅÅ´ÆÃ³ÈÅ°ÈÈµÉÆ¶ÄÆ²ÈÆ¶ÉÊµÉÆ¶ÈÇ³ÇÈ·ÊÇµÊÉ·ÊÈ¶ÊÆ±ÈÄ±ÊÇ·ÊÆ³ÊÇµÊÈµËÇ·ÉÇµÉÃ´ÊÇ´ÊÈ¸ÍÉ·ÉÄ·ÌÈµÌÈ¸ÌÉ¸ÌÈ·ËÈµÊÈ·ËÇ´ÌÈµÊÇµÌË·ÍÇ·ÉË·ÌÊµÊÌ·ËÉ¹ËÌ¸ÌÆ³ÉÊ·ÊÊ·ÉÊ·ÌÇ¸ÊÌµÌË·ÍÌ¸ÌÇ»ÌÏ¹ËÇ¹ÊÈ·ÌËºÌÊµÉÈ·ÉÊ¸ÌÊ·ÊË¸ÌË»ËÊ·ÈÈ¶ÌÌ·ÍÊ·ÊÊµÌÌ¸ÌË»ÎÈ·ËÊ¸ËÈ¸ÌÆºËÊ·ÌÌµÍÊºÍÐ¸ÌÌ¸ÍÉ·ÌÈºÎË·ÍÍ»ÎÌ»ÌËºÎÊ»ÎÊ»ÍÌ¸ÌÌ¶ÎÎ»ÐÎ¼ÐËºÎË¸ÏÌ¸ÐË·ÌÉ¼ÎÍ¸ÎÌºÐÍ»ÍÌ¸ÎË¸ÎÎ»ÌÎºÎÌ¶ÏÌ¸ËÍºÏË¹ÌÊ¹ÊÎ»ÍÎ»ÎÌ»ÍÎ»ÎË¹ÐÎ»ÌÌ¾ÐÏ»ÏÎºÏÎ½ÎÎ¸ÑÌ»ÎÌ¹ÏÎ¾ÑÌ·ÏÉ¹ÎÌ·ÎÎ»ÐÎ¿ÎÎ¼ÎÍ¸ÓÎ»ÎÌ»ÑÌ¹ÏÌ·ÐÎ»ËÎ¸ÌÎºÎÌ¸ÏË»ÆÃ³¿´¥·«tkrktiqoxgrYiW|g[wiYt]Ut[WodQo`Sg`WldSnd[n`[qfWliSlkYibWtbWgk[qbYq]OiSIdWKbYMf[UdbWkbWli`ko[lbYl[QfdQg`Sg]Sg`Uf`Sg]Qd_Qi[Mg]Q`[OiYIgWM]YQg[Of]Of`UdYOi]Sd`Si`Qg_YfbUii[ogYkg]ig[gfUlWMd_Ok`OgYOgbQg[FiUOdYQf]K`[SdYQdYQd[Qb[Uf`Q`YQlUSd_IgYObWUf`Oi_OfYSd_QfYQf[OkYUg_MgYKg]Sg[Mg_SddUl]Mn[QgdWldYof_qn`wt`zkt®¦¤¢·¨³¼§µ¾±»Ç³ÃÌ¸ÉÏ»ÌÎ»ÏÑ»ÏÏ»ÌË¾ÎÌ¾ÎÐºÌÎ»ÌÎ½ÎÎ¾ÎÊ»ËÎ¼ÏË¸ÌÎ¾ËÌ»ÌÏ»ÐÌ¾ÌÍ·ÌÌºÐÎºÊÌ¸ÊÌ»ÍÌºÏÎ¸ÌÎ¹ÏÎºÊË¹ÌÎ½ÐË¸ÌÌ»ÊÌµÊÌ»ÎË¾ËÎ»ÎÊ»ÍÎ¸ËÎ¸ÍÌºËÊ·ÌÌ¸ÏÌ·ÌÊ·ÊÌ¹ÏÊ¹ÌÊ»ËÍºÌË¸ÍÈ·ÌÍ¹ÍÈ¸ÌÈ¹ÍÉ»ÌÊ·ÍÊºÊÎ¹ËÌ»ÎÌºÌÌ»ÌÇ·ÍÌºÎÎ¹ÍÌ·ÌÈ¼ÍÌ¸ÌÌºÌÈ¸ËË¹ÈÍ¸ÉÈ»ÊÈ¸ÊÉ¹ÌÌ·ÎÊ¸ÉË¹ÊÈ³ÌÈ¸ËÈ¹ËÊ·ÊÈ¶ÊÊ»ÊÃµÌÊ¶ÆÇ¸ÊÊ¸ËÈ¸ÈÈ¸ÈËµÉÆ¸ÈÈµÆÈ·ÉÊ¶ÈÆ»ÈÆµÆÈ¶ÈÇ¸ÉÈ·ÊÅµÈÄµÈÇ¶ÆÆ·ÊÅ³ÄÆµÇÆ¶ÆÄ·ÆÆ·ÊÉ´ÇÅ¶ÈÈµÆÅ³ÈÆµÅÃ°ÈÅ¶ÇÄ³ÆÄ¸ÇÆ´ÈÃ³ÈÆ·ÆÇ¶ÈÃ¶ÉÃ³ÄÄ³ÆÃ²ÁÅ¶ÆÄ´ÆÆ³ÄÁ±ÅÂµÆÃ²ÆÃ´ÄÄ¶ÆÃ³ÆÆ¶Æ¿µÅÅ¯ÄÃ¯ÃÄ´ÆÄ²ÃÄ°ÁÃ³ÅÅ³Å¿±ÂÁ²ÄÅ²ÃÄ±ÄÂ±ÃÀ±ÃÀ°ÃÁ´ÂÃ°ÂÀ³ÂÃ±ÁÁ°Ä¿²ÃÁ³Ã¾°ÁÁ¯ÆÁ®ÁÀ±Á¿±ÂÀ®ÂÁ°ÂÁ®À¾­ÁÀ³ÁÀ°Â¾¬À¾¬½¾­Á½«Âº­Ã¾¬¿À«¾À°½¼®¿¾«¾º¬Á»­¾»­¾½¬º¼®À¹©¾»¯½»«½¼­½º¬½»«¾¾®¿¾­¾¼«¾¾¬¾»­¾»¬»¹«½»°½º¬»¼­¾»¬½¸«¾¹ª¾¾­½¹«»¸¬¿»­½½­»·«½»¬»¸ª»»«½»§½·ª¸ºª½»©¾¹ª¹º®¾¹¨¹¸«»¸ª¸¹¨¸·¨¹¸ª¸¹§¹·¥·¶©µ·ª··¤··§·µ§¹·§¸´¥¸³¦·³¦º·©º¶©¸·¤¸³¤µ´©¸³¤¹´£·³©··¥··£µ²¤µ³¤¸·¤·¯­¸·¦Á·§½µ¬¿µ¨¾¶©¾»¯¿¶¬¼¹¬Á¹­¿º¬½·ª¾»ªÁ·¬À¹¬¿º¬»¹¬Â¹ª½º¯Á·©¾·«¾¹­Á»¬Á¸ªÂ¹¬Ã¸®Àº¬Ã·¬¿º­Ã¼¯Á·°Âº¬Ã»¬Â¼¬Á¼¯Ã»®Á¿°Ã¼¯Â¾¯Ã½°Â¾®Ã»¯Â»¬À»®À»®Â»®Ã»¬ÃÀ°Ä»°ÄÁ®Å¾°ÃÁ®Ã»¯Âº³Å¿²Ç¾¯Æ½³Â¾¯Â¾³ÄÀ®Ç¿°ÆÁ±ÉÃ³ÆÁ³ÇÁ²ÆÂ³ÆÁ°ÈÁ±È¾³ÆÁ®ÈÁ³Ç½°ÃÁ°ÇÁ°ÆÀ±ÆÁ³ÆÁ³ÆÁ±ÄÁ´ÇÁ´ÉÂ²ÆÁ³ÈÄ²É¿³ÆÃ®ÇÃµÆÂ´ÈÃµÆÁ°ÈÂ¶ÇÄ¶ÊÂ®ÌÃ³ÈÅµÊÂ³ÇÆ²ÈÂµËÅµÉÃ³ÉÄ¶ÈÂ¶ÊÅ¶ÌÆ·ÈÁ³ÈÈ·ËÃ³ÇÄ´ÉÃµÉÅ³ÆÄºÊÆ´ÍÄ¹ÈÃ³ÌÅ¶ËÄ¹ÉÆ»ÊÇ·ÎÅ¶ÊÈ»ÍÇ¶ÈÅµÊÆ¹ÉÈµÌÅ¶ÌÅ·ÌÅ¹ÍÆ¶ÍÇ·ÌÆ¶ÍÈºÌÈ¹ËÈ¶ËÆ¶ÎÈ·ÌÈºÎÉ¹ÌÇ¸ÍÈ¹ÌÉ¶ÎÉ¹ÍÈ¹ÎÈ¸ÎÊ·ÌÆ·ÌÈ¸ÎÈ»ÐÆ¶ÌÈ»ÎÈµËÊ¹ÎËºÎË¹ÐÇ·ÎÉºÎÊ»ÐÈ¹ÎÈ¹ÐÈ¹ÌÊ·ÐÉºÍÊ¼ÎËºÎÊºÏÍ»ÐÉ»ÌÈ¹ÐÌ¹ÏÊ»ÎÈºÐÌ»ÐÍ·ÍË¾ÌË½ÎË½ÐÊ½ÐÈ»ÐË¼ÒÌºÐÌÀÐÊ¼ÎË»ÐÍ¼ÒË»ÑÌ»ÑÍ¾ÐÎ»ÒÉ¹ÐÌ¹ÎÌ½ÐÊºÏÍ»ÒË¼ÐÍ¹ÐÌ¾ÏÊ¾ÑÌºÐÉ¼ÒÍ¼ÒÈ¸ÒÌºÏÊ»ÎÌ¼ÐÌ¹ÐÍ¼ÍÍ¼ÒÎ»ÒË¼ÔÌ»ÒÌºÏÊºÑÌ½ÐÈ»ÒÌ½ÏÐ½ÕÌ¿ÓÊ¾ÐÌ»ÓÎ¾ÒÌ¾ÒË½ÐÍ¼ÓÐÂÒÌ¾ÓÐ»ÒÐ¿ÑÍ¿ÕÐÀÕËÀÓÎ¼ÒÎ¿ÓÎ¾ÕÎ¿ÒÍ¼ÔÍ¿ÓÎÀÕÎ¾ÒÌ¼ÏÐ¾ÔÐÁÒÌ¿ÔÐ½ÒÍÀÒÍ¿ÓÍ¾ÓÏ¾ÓÏ¼ÒÐ¾ÓÎ¾ÒÌ¼ÒÎ¼ÕÍÁÓÏÁÒÐ»ÕÑ¾ÐÏ¿ÕÍ½ÒÐ¿ÕÑÂÕÐ¿ÓÐ¾ÒÐ½ÔÐ¾ÓÌÁÒÎ¾ÐÏ¾ÓÏÂÓÏÃÖÐ»ÐÍ¿ÓÐ¾ÕÓ¾ÓÒÁÒÑ»ÒÓ¿ÒÑÀÔÎÂÔÏ»ÑÌ½ÎÈ»ÌÊ¹Ã»°½¯xoikbi[n`kbtgwgrilbd`{f]zb]ui`tf_trdzqgxrbwoiwl[zg]xi`uf_robwldwl`u]]qWWn_Uo[Qq_]nb[t]]o`]rbbwd_r[Yri_t``nf]r_[r]UkYYlb]ndUq]WkYUt]Wl[Si[]q_Un`Sn[[rYWo`Ul_Wo_YrWUo`YlfYu]Yr_]n_]q`[t]]of[rdUt`Yo_[n_UrY]nWSn_Uo]]i`Sn_Su`Wt]Wof]ob[t`Yo]Sq_Yk[Yn[So`]r[]l[YqU[q`Yo][n`So_[l[]u`Yq`[n_]tfYtd[l`[td_zfbtgdxif~obog~~w¨­¬·­»É·ÃÎ»ËÎ¿ÍÐ¿ÔÑÁÒÑ¾ÎÒÁÔÓÃÓÑÁÒÏ¾ÕÍ¿ÐÒÃÒÐÁÑÐÁÕÒ»ÒÐ¿ÒÎÁÔÍ¿ÒÎ¾ÒÍ¿ÐÐ¿ÓÌ¿ÐÏ¼ÒÑ¼ÒÐÁÒÎÀÑÎ»ÓÎ¾ÐÏ¿ÒÏ¿ÒÎ¼ÑÎÁÐÐÁÖÎÀÒÐ½ÐÒ¾ÓÏÀÑÐ¿ÐÐ½ÑÍ¿ÌÎÀÓÍ¾ÐÍ¿ÎÍÁÎÊ½ÑÌ¾ÐÌÀÒÎ½ÒÏ¿ÔÍÁÑÎÀÑÐ¼ÒË¾ÐÌÀÐÎ¾ÒÌÁÐÐ¿ÒÐ¾ÐÌ¿ÓÎ½ÒÍ»ÓÐ¾ÎË½ÏÍÀÐÌÁÐÌ¾ÎÈ½ÒÎ»ÐÌ½ÒÍºÎÊ¾ÐÌ¾ÎÌ½ÐÍ»ÐÌ½ÎÎ»ÓÉ¼ÎÈ¼ÍÊ»ÐÉ¼ÑË½ÎÉ»ÎÊ¹ÎÈ¾ÌÌ½ÑÍ¾ÌÈ¸ÎÌ½ÎË»ÐÉ·ÏÊ»ÎÌºÌÈºÎÈ¼ÊÊ»ÎÊ¿ÌÈºÍÊ»ÐÈ»ÍÉ»ÍÆ»ÌÈ¹ÌÇ»ÍÈºÍÈ¹ÍÇºÌÈ»ÌÉ·ÌÈºÍÆ·ÎÇ·ÏÅ½ËÆºÊÇ¹ÎÈ·ÌÈ¹ÌÈºËÆ¹ÌÆ»ÏÊ¹ËÆºÊÇ·ÌÅ¸ÊÂ¸ÊÈ¹ËÅ¹ËÉ¶ÊÆ¹ÎÆ»ËÇ´ÊÅ·ÈÆ¸ÊÇ¹ÇÆºÈÅµÈÇ¶ÈÆ·ËÃ¹ËÃ³ÊÂ¶ÈÅ»ÈÆ¶ÈÁ´ÉÁ¶ÈÆ»ÈÄ¶ÆÅµÇÅ±ÈÃ´ËÁ·ÆÁµÈÃ´ÇÄ·ÆÁ¶ÉÂ²ÅÂ¹ÅÃ´ÈÂ´ÇÀ³ÅÂµÅÃ³Æ¿³ÆÁ³ÅÁ³ÆÂ²ÅÂ³ÅÁ´Æ¿±ÂÀ³Ã¾³ÅÂ°ÃÀ¶Æ¾´ÄÁ³Ã¾²ÆÀµÆÀ²Ã»°Ã»¯Á½³Ã»¯Â¾²Ã¾®Ã¾³¾¾°Ã»±Ä½¯Ã¾±ÁÁ¯Ã¾³Ã»°Â¾®Â½®Â»³Ã»®Â¾³Á¼²Á¼±Á»¯¾¹°Á½³Á¿°Á»°Á¿±Ã¼°Ã»¬¾»¯Ã¾±¿»±¿»¯Á¹¯¿»®¿¹¯Â¼¯Á·­Á¾±Â»®Ã»®¾¸¬Áº³Á»¬Á·«¾¹¬½¾®¾·¬¼¶¬½¹ª¾¶®»¸¬¾¹¬¼¸©¼¸¬¾·®½¸¬»´¬½µ¬»¹¨¾º¬¼¶©½·ª¾¸¬½·©¾²©»µ¬»·«½µ©»­¤°µ¢»³¦¹¸§·³¡º¸¥º¸¥¸µ§»·¨»´§·µ¤»¸§º³¥¸·¤¸·¤»·¥»µ¦»¶¤¸·¡¼»ª¼¸¤¾·¦º¶¨¾¸§»¸¥ºµ¨¼¶¤¼¹¨¼¶§»¶§¾·§¼·¬¾½§»»©¾»©¼º¬¾¸¨¾¼­¾»©Â»«À¹ª½¹¦¾¼¨¼»¨»¼¬»¾«¾¹«¾»«½½¨¾»©Áº§¿»©Á»ª½¸©¾½ªÀ¾«Á¸¬À»¬ÀÁ«Ã½¨À½¯¿º«Â¾®¿¾®ÆÀ­Â½¬ÃÀ¬ÂÀ­Ã¾®Á¾­Ã½®Á¾¬ÃÀ®Ã¾«ÂÀ­Ä¾²Â¿¬Á¾®ÁÀ®ÃÁ®Ä¾ªÄ¾®ÃÀ²ÃÄ­ÃÀ«Á¼¬ÀÀ«Ã¾®ÃÁ¬ÃÁ­ÁÀ¬ÂÁ±ÃÃ±ÆÁ­Á½®ÄÁ³ÇÅ¯Æ¾°ÁÃ±ÆÁ­ÃÀ°ÄÆ°ÄÁ°ÈÁ±ÆÃ±ÅÁ¯ÄÀ±ÇÆ±ÆÁªÄÂ®ÁÂ±ÇÄ®ÅÃ²ÆÁ±ÈÄ¯ÈÃ²ÆÄ³ÄÆ±ÅÂ±ÇÆ±ÈÄ±ÈÅ²ÆÄ³ÅÄ³ÈÆ´ÆÈ³ÇÄ·ÈÅ°ÉÆ³ÇÃµÈÄ³ÊÂ´ÆÇµÉÃ³ÊÆ´ÇÆ·ÅÇ´ÆÃ²ÈÆµÊÅ´ËÇ³ÈÄ´ÇÉ³ÌÂ·ÈÇµÈÄµÆÃ³ÆÇ³ÉÆµÉÆ·ÈÊ³ÊÉ·ËÄµÊÅ´ÉÉ³ÈÌ³ÊÆ·ÉÅµÉÇ³ÈÈ´ÈÇºËÇµÈÈ¸ÊÅ¶ÌÅ·ÊÈ´ÈÈµÈÈ·ÌÇ²ÈÆ³ËÉ·ÊÈ¶ÈÄ³ÌÇ¸ÍÉ´ÉÇ·ËÈ¶ËÈµÊÈµÊÊ·ÊÉ¸ÌÈ·ÊÌ¼ÌÊ·ÎÉ·ÌÈ»ÌÊ´ÎÈ·ÊÊ·ÍÈµÌÈ¸ÌÌ¹ÌËºÌÉ¹ÉÉ¹ÌÊµÌÌ¸ÉÈ¹ÌÈºÊÆ·ÈÈµËÉ·ÍÉ¸ÌÌ¸ËÈ¶ÍÌ¸ÊÎµÈÈ´ÌÌ·ËÇ³ÉÉµÌÈ·ËÉµËÈºÌÊµÌÊ·ÌÊºÎÉ¸ÌË¶ÊÌ»ÎÍºÎÌºËÌºÏÊ¶ÍÏ¼ÏÊ»ÍÊ¼ÌÌ»ÏÌ¶ÌÎºÐÌµËÌ·ÏÌ¹ÎÊ¹ÑÉ·ÎÌºÍÌ¹ÐÐ·ÌÊºÌÐ¶ÏÍ»ÑÊ¾ËÌºÎÎ¸ÏÍºÏËºÎÊ·ÐË¼ÏÌ»ÌÊ¸ÌË·ÎÎ»ÎË·ÌÊºÎÎºÒÎ¸ÐÌºÏÐ½ÎÎ¹ÏÏºÐÉ»ÏÍ·ÐÊ·ÐÌ»ÏÐ·ÎÌ»ÐÏºÐÎ»ÑÏ»ÑÎ»ÎÌºÏÐ¸ÍÊ¼ÊÌ¿ÎÎ¸ÌË¼ÌÐ»ÎË¹ÉÃ³ÃÂª»­¯tfdUw`Qu`YrkSql`tq_wobzritbxq_wl[tgWqdWndYkl_qo`qgbri]qn_rqWrfYqfYn`QrbYnbYnfQk`QiYUf_Qg`Qd`Sl[QiYQi]Mk]Qk`WibOgbUi_QkYQkYOiYKg[Sg`Qk]Yl[Kg[Qd]Qk_MkUQf]OiWQ`WIfYOf]Og[OdUOgUIfUQdYMg_KgYWfWOi`QfYSfYUndOgYQfWSl`OfYMfWKfUMd[MdSOfYMlUQd_Qg_Qg`UkdQd`SiYKgYQl]Un]KfYQdWMgYKgYOg_Qd]KgUSdYSk_Oi`SidUkbQnYQg`Qn_UrWSk[YqdWqn]tnbzqY{ndzxq­ªÀ¯¶Ê·ÂÌ¹ÇÊ½ÊÎ½ÌÏ»ÌÎ»ÌÏ»ÍÐ¾ËÌ¸ÏÏ½ËÎ¹ÍÍ¼ÎÌ¼ÐÎºÌÊ¹ÎÏ»ÌË»ÏÍ»ÐÌ»ÎÍ»ÏÌ»ËË»ÍÌ¸ÌÌ¹ÌÍÀÏÎ¸ËÊºÌÍºÍÍ»ÌËºÎÌºÌÊ½ÍÊ¸ÌË¹ÌÐ¼ÌËºÏÍ¼ÉÌºÌÊ¹ÌË¹ÌÎºÌÌ¹ÎÈºÊË¼ÎÍ¹ÏÊ»ËÌ»ÉÊ¹ÎÌ¸ËÍ¹ËÈ·ÍË»ÊË»ÊÌ»ÍÌ»ÊÊ·ÎÌ·ÈÌºÉÊ»ÌÈ¹ËÌ»ÊË·ËÌ·ÌÉ·ÊÉºËÌ½ÌÊ¸ÌÊ»ÊË¸ËÈºÊÊ¸ÌÊ¸ÊÊ·ËÊ·ÊÊºËÊ¸ÎÊ·ËÈ¶ÊÌ¹ÌÆ·ÊÈ»ÊÇ¶ËÇ·ÈÄ³ÈÊ·ÊÈ¹ÊÆµÆÇºÊÉ·ÈÇ¸ÈÄ·ÈÆµÆÆºËÄµÊÆ±ÇÆ·ÆÇ·ÉÆ¶ÆÆµÈÆµÈÈµÊÆ´ÇÄµÄÆ³ÇÃ´ÆÃ¶ÈÈ´ÇÃµÉÆ¶ÅÃµÆÄ³ÅÃ·ÆÇµÊÈ²ÉÃ¹ÆÃ³ÃÅ´ÈÆ³ÅÃ·ÅÅ³ÈÅµÈÃ´ÅÆ´ÃÆ±ÄÂµÄÅ´ÉÃ²ÈÂ²ÃÆ³ÇÆ³ÆÆ±ÈÀ²ÃÄ³ÃÂ³ÃÁ²ÄÁ³ÆÂ¯ÆÄµÃÁ®ÆÃ±ÁÃ´ÄÁ³ÇÀ²ÃÀ®ÅÃµÃÁ²ÁÁ²ÃÁ¯ÆÁ²ÃÃ¬Á¾±ÁÃ°Ä¾³ÃÃ°¿Á­Â¾³ÁÁ²Ä¿°Ã¾²¿¾¯Á½¬Á¿°Ã¼®½½²Á¾°Á¾±¿¾­ÁÀ¯¼Á¯Ã¾±Â¼­À¾ªÁÀ±Á¾®½»®¾½®½¿°Á¼®Á¼«¿»ª¾¹¯¼¿¬¾»­¾¼¬º¾«¼»«¾º¬À»§¾º«¾¹ª¼»¬½½®½º¬¾»®»º©¾ºª»»©¾¸©¾¾«½º®¾¹¬¾¼¨½¸¬¾½¬½»¬¹·¬¾»§¾·«½ºªº¸ª»·§»·©¸»«¿¹©»»¬»º§»º¬º»©º·©»¸ª¹¹¨¹¶«»¸§ºµ§·³¤·³¥¶´¨··¨¹µ¥¹¸¥··§ºµ¥ºµ©··¦·¶§¸µ¤·µ§·³§¸´¤¸²¦µµ¥¶³¥»°§¶³§·´£¸²¬·»¬¾º§¼»¬¼µ¥½»¬¿¹­¾·ª¾¹¨½·«¿¸«Àºª½¸ª¾¸«¾¹¬À·ª¼»¬Â»¨¾¹¯À¹°¿¹¦Âº«¾¹®Â½«Àº¬Á¸ªÁ»®¿»¬¾¶¬½¼®¼»¬Á¹®Ã½­À»¬Ã¾³À»¯Ã½©Â¾¬Ã¼®Ã¼¬Á¾­¿»¯ÄÀ¬À¼¬Á»²Á¿­Ã¼¬Á½­Ã½®Ä¾®Å½®Á¿­Â¾¬Ã»±Å½±Å½®Ã¼°ÄÀ³ÃÀ°Æ½¬Á¿³Å¿±Ä½±Ã»±ÅÁ²ÈÁ³ÊÀ²È¿²ÂÀ°ÆÃ°ÆÁ³ÊÀ®Ç¿³ÅÃ­ÆÂ²È¾³ÇÅ³ÊÃ³ÈÄ´ÈÀ´È½°ÊÂ·ÈÀ²È¿­Å¿°ÆÁ¶Ë¿³ÆÁ²ÆÂ²ÄÃ°ÇÀ²ÈÁ´ÇÀ²ÉÈµÊÃ¶ÈÂ´ÉÅ³ÈÄ¶ÇÈ´ÊÅ¶ÉÄ´ÈÆµÉÄ¶ÉÄµÊÇµÈÂ¶ËÅ´ÊÅ·ÉÁ´ÇÆ·ÆÃ»ÌÄ¶ÊÅ·ÈÃ·ÌÆ·ÎÂµÉÇ¸ÈÅ·ÌÅ¹ÍÇµËÄ¹ÌÆ»ÊÆ¸ÍÈµÌÈ»ËÆ·ËÆ»ÌÈµËÅ·ÍË¹ÍÈ·ÌÇ¶ÍÆ·ÏÉ¸ÊÇ¸ÌÈ·ÌÊ·ÌÇ¹ÌÈ»ÍÈºÊÈºÎÉºÍÍ¹ÎÉµÏÄ»ÌÊ»ÍÇ»ÎÈºÎÈ»ÓËºÌÊ»ÎÈºÐÊ»ÎÈ¹ÍÊ»ÎÊ¸ÎÈ¼ÐÈºÏÌºÍÈ»ÎÇ¼ÎÊ·ÍÊ»ÏÌ»ÐÊ½ÏÏ¹ÒÈ½ÐÉµÍÈ»ÎÉ»ÐÊ»ÒÉ»ÍÈ¹ÎÊ¹ÐÈ½ÐÇ»ÎÇ»ÐÍ»ÐÈ¼ÐÊ»ÒÉ¼ÑÍ¾ÏÍ¾ÎË»ÑÌºÏÊ¿ÑÎ»ÓÊ»ÌÈ»ÐË¹ÐË½ÐÎ»ÏÍºÐÍºÏÌ¿ÓÊ¼ÐÌ»ÎÍ»ÐÌ¾ÐÊ¼ÐÍºÎÌ½ÒÍ½ÑÊ½ÐÊ½ÒÎ¿ÓË¾ÏË»ÒËºÑÊ»ÐË¼ÐÊ¼ÑË»ÒË¼ÒË½ÒÌ»ÒÍ½ÑÍ¾ÓÎ»ÐÎ¿ÕÍ¼ÓÎ·ÓÌ½ÓÌ¹ÒÎ¼ÒÍ¿ÓÎÂÒÏÁÔÑ¾ÕÍ¼ÓÏ½ÒË»ÕÍ½ÖÍ¿ÒÈÁÓÌ½ÔÌ»ÔÎ¾ÐÌ¾ÒÎ¾ÖÎ¾ÓÎ¾ÖÐÂÕÎ»ÒÒ¾ÒÑ¾ÓÎ½ÒËÀÓÐ¾ÕÐ»ÒÐ½ÒÌ¿ÕÐ¿ÓÎ¾ÏÎÁÓÓ¿ÒÍ¾ÒÐÁÓÎ¾ÐÎ¾ÓÌ¿ÒÑ¿ÒÒ¿ÓÎÃÓÐ½ÓÑ¿ÓÐ¿ÕÐ¼×Î¿ÓÏÁÓÐÁÓÐ¾ÑÌ»ÒÎÀÒÐÁÒÊ¾ÎÊ»ÎÊºÆÁ´Ã¯¥µ¤wto`][z`bqi`wwbxrfuirgog|xnuozi{ni|n`xl`zkbwqdzi`wli{u_ol~k_wlbw_]tb_uf[rg]w]_rb_qgWufbrb[ub[uY]nf_w`]og`tfbxk_wb[r__o`Ut]Ylg`rfbqd]r_Yn[YodUn]]o[Ul[SnUUkUSlWSn[[k]Uk_UlWOg[[n_Swb[qd[qbWr_]qb[ndWtb[ud]l[[n_Sn[Wn[SoUMoYUiW]k`Qu_]nd]of]u``od[ni[t]Wu][qf[t[Ur[Sl[Uo]Un[_rd_n[Ut]YiU]r`[lb]qbYrfYu`bng[u`]tWWo]]wd_tigtkixk_{f`zbd~rl·¬¯ÇºÀÆ¹ÃÁºÅÍ¾ÌÏ¾ËÐÂÏÑÁÒÐ¾ÍÎ½ÐÐ¿ÑÐÀÒÍÃÒÍ¿ÐÒÁÓÍ¾ÒÑÃÖÐÀÕÎÁÕÐÁÕÐÁÓÐÁÒÏ¾ÒÑ¼ÒÐ¾ÑÍÀÕÏÀÒÍÁÒÌÁÒÎºÐÍ¿ÐÐÀÕÎÁÒÎºÒÌÁÓÐÁÐÍÁÓÍ»ÐÌÁÒÐ½ÐÏÁÑÈ½ÐÎ¼ÎË¿ÐÏ¿ÒÌÁÒÎ½ÒÎ¿ÐÏÁÑÌ½ÏË»ÐÎ¾ÑÑ¿ÑÍ¼ÐÊ¾ÑÐ¼ÐÎ¿ÒÍ¾ÐÌ¼ÓÌÁÓÏÁÒÌ½ÍÌ»ÐÌ»ÓÊÀÐÊ½ÒÌ¼ÑÎ½ÒË¾ÎÊ¼ÏÊÀÑÊ¾ÏÌ¾ÑÎ»ÐÎ¼ÍÎ¼ÐÎ»ÒË¾ÐÈ½ÐÌ½ÑÌ»ÏÉ½ÐÊ»ÎÌºËË¼ÌÌ¼ÎÌ½ÐÆ¼ÎÊ»ÍÌ¶ÍÊ¿ÍÌÀÒÈ½ÍÉ»ÍË»ÌÈ¹ÎÈ¹ÎÈ¹ÎÆºËÌ¹ÌÈ¼ÌÈ»ÍÅºÌÈ»ÎÈ·ÊÆ»ÌÇ¼ÍÊ·ÍÆ½ÍÆ¹ÊÉ¸ÌÈ·ÊÈ¹ÊÆ·ÊÊ¼ÈÇ·ÈÊ·ËÆ·ÊÅ·ÈÈ¹ÌÆ·ËÇ¹ÌÅ·ÈÈ·ÈÆ·ÉÃ¹ÊÇ¶ËÅ·ÊÆ·ÊÈ¹ÌÆ»ÈÆ·ÇÁ¶ÊÆ¶ÌÄµÌÆ¶ÈÆ´ÇÃºÌÄ·ÆÄ³ÌÃ·ÈÆ·ÅÃ¶ÈÂ·ÇÇ·ÌÁµÈÇµÇÆ¶ÈÃ³ÈÃ¸ÈÆ´ÇÃ·ÊÆµÈÁ¸ÆÄ³ÆÁµÊÁ³ÅÂ´ÄÁ±ÄÂ¶ÄÁ³ÈÁ¯ÃÁ³ÄÁµÅÁ³ÇÂ³ÂÀ´Æ¿³ÆÁµÃ½´ÅÁ´ÆÀ³Ã¿²Å¿´Ã¾±ÇÀ®Ã¾¶ÃÂ³Æ¾±Ä¾²Ã½°Ã¾°Ã½®Æ¾³Â¾³Á»³Áº¯Ã¾µÃ¿´Á»®Á»­Ã¾¯ÃÁ³¿º¬Â¾²Ä¾³Ã»­Á»±À¿°ÁÀ®Â½²Á»³Á½°Á»³Á¼´Á¼°À¼²À¾®Ã¸¯¿¾­¿º®Ã»­¿¸¬Â¼³Á»¬Á»¯½¼°¿»¯À¹¯¾¸¯¾·®¿¶¬¾¹¬À»¬¾·¬½¶®¼¸¬¾·¬»¸¯¼¹¨½¶¬¼¹¯½¹¬¾¶¨¼µ¬º·¨»·¬¹µª½·ª»¶¬¾¸©¼·¬»·«½¶«¼·«½·ª»¯£´¶§º¶¦¹º¨¹¶¨»¶§»»§¹·§º·¢»¶¤¹´§º¹©º³£¶¸§¸µ¥½¸¥º¸¨»¸¢¸¸ª»»¦¼·¦½·¢º¸§º·§»µ¤¼·¦½º¥¼¸§¼·¦½¸§··©½µ§¼¹¬¼·©¼¼§»¹¬»º©½º¨¾º«»¹«¼¸¨À»¨¾¼§¾½¥½º§¾¹©¾¹§½»§¾»©Á»©Á»§¾»¦¿¼ª¾¼¬¼»«¾»¬Á¾§½»©À¾©À½¬Á»§¾½ªÁ»ª¾»§¾¾«¿Á«¿¼«Á¿«¿¿©À½«ÂÁ¬Æ¿¯¾¾¬ÅÁ¬Â¿¬ÁÁ¯ÃÀ®Å½¬Á¾¯ÃÀ¯Â¾¬ÄÁ­ÅÀ­Á¾«ÃÁ®Á¾¬ÃÂ¬Ã¾ªÁ½­ÂÀ¬Ä¾°Ã¿²ÂÄ²ÂÁ«Ä¿±ÃÃ²ÅÃ¯ÃÁ­ÄÃ´ÈÃ²ÆÃ­ÄÃ²ÄÁ®ÇÃ´ÇÁ³ÄÃ¯ÆÁ°ÇÁ³ÅÃ®ÇÃ±ÃÃ±ÈÄ°ÈÄ±ÇÀ¯ÆÂ´ÈÄ®ÇÁ°ÅÄ²ÇÅ³ÅÆ±ÇÅ±ÉÃ°ÇÂ°ÅÁµÈÇ¶ÆÆ°ÆÃ°ÉÄ³ÆÃ°ÇÄ°ÅÈµÌÆ²ÊÅµÇÇ²ÇÆµÉÄ·ÃÅµÈÇ°ÊÄ³ÃÄ²ÊÈµÈÆ´ÎÈµÊÈ±ÉÆ³ÉÆ·ÆÈ³ÌÇ³ÈÄµÇÄ²ÉÆ´ÊÄµÈÇ³ÊË´ÈÆ·ÇÇºÌÇ·ÊÊ¸ÌÇ´ÌÃ¶ÌÈ¸ÊÈ³ÌÇ³ÊÉ·ÈÊ·ÊÊ¸ÈÇ·ÌÉ¸ÊÉµÊÆ´ÌÉ·ÊÇ²ÊÆ¶ÊÇ·ÉÈ¶ËÊ¶ÉÉ·ÌÊ·ÎÉ·ËÈ·ÌË¹ÊÊ¹ÏÊ¸ËË»ËÊ³ÌÌ·ÎÌ¹ÎÍ¸ËÈºÎÌ¶ËÊµÌÊ·ÉÆ·ËÈ»ÊÊ¶ÎÉ·ÎÊ·ÍÊ·ÊÈ¶ÊÊµÍÉ¶ÊÊ¶ÌÇµÊÈ¶ÌÊ·ËË¸ÌÌ·ËÊ·ÌÈ¶ÌÊ¶ÌÉ·ÈË·ËÊ·ÌÊ¸ÊÊ·ÏÈ·ÎÊ·ÊÊ¸ÎÊ¹ÎÉ·ÌÉ¹ËÌµÏÈ·ÌÌ»ÏÌ¸ÎÌ¸ÌÏ¼ÏÌ»ÎËºÌÌ¹ÍÏ·ÏÍºÎË¹ÍÍ¸ÎÊ¸ÎÎºÌÌ¸ÌËµÏÌ¹ÎÌ¹ÎÌ¹ÐË¼ÌÍºÏÏ¹ÎÎ·ÎÎºÏÎºÐÌºÏÊ¹ÎÌ»ÎÏ¸ËÎ»ÐË¹ÐÌ¸ÎË¹ÎÍ»ÎÎ¸ÏÍ»ÍÌ·ÐË¹ÏË»ËÌºÏËºÐÌ¹ÍÎºÏÎ·ÎÌ¹ÎÎ¼ÒÏ»ÒÌ½ÎÎ»ÐË·ÎÆ¸ÆÆ´ÉÈµÉË³ÇÈ³ÄÃ±¼µ¤µ¡nk_z`Wu`QrdMlfUoq]nt]wk`tn]xk[ux]tq]uo_xk[qk]qkWnlYnkYrfYqd[rl[riYrnUnn[niYrdWqnYrdYngQnf[ikUn`Uk`SldYkiQl_OkgSnf`lwYnt`qgWndSl_SlbMr]Qi`Ug`On]Ok_QkbOk`Mg_Of[MiYKiQI`UMfYIg[Od`QgUKd[Ob`Qi_Qk_Oi_Qg`Mg]OibUldSg_Og_Md]Kg_Ii[OdWIiUKgUMbYMi`Og]Mi]QiYKg_OifUibQk`Sf`QgbOiWFdWIdYKi]Qg]MgfOkYQg]Og[Of`Mk`OkbUndQi]Qd[Ol]MkWUg`Ml]UldYn`Ul]Qo]UqgUut© ©µª®¾¨³Æ³¼Ê·ÃÉºÅÌ»ÊÎºÉÍ»ÌÎ»ÎÏ¸ÎÎ¹ÌË»ÌÎ¾ÎÌ¹ÎÎ»ÎÌ¾ÐÎ·ËÌ»ÏÎ¹ÎÏºÐÎ»ÎÊ»ÍÊ»ÎÎ½ÐÎ½ÐÌ¼ÐÊ»ÎÍ·ÌÌ¸ÐÊ»ÎÌ·ÊÌ»ÍÊ¹ÍÉ¸ÌÎ»ËÌ»ÌÎ»ÌÍºÎËµÊË»ÌÌ·ÊÌ¹ÌÎºÊÌ¼ÎË·ÌÊ¶ÌÌºÊÌ·ÍÌ»ÎÊ·ÎÌ·ÌË¼ÌÏºÍË·ÏË¸ËÈ·ÉÎ¹ÍÈ·ÌÉ¸ÌË»ÎÌ¸ÌÊºÉÊ¶ÌÊ·ÊÊ·ËÈ·ÍÌ·ÍÈ»ÌÍ»ËÈµÊÊ¹ÎÊºÌË¸ÊÊ·ÉÉ»ËÌ¸ÈÈµÆÇ¹ÊÇ³ÈÈ·ÈÊ¸ÊÌ·ÌÇ¸ÉËºÈÈ·ËÊ¶ÉÇ³ÊÉ¶ÊÈ³ÆÊºËÊ±ÈÆ·ÉÆµÈÆ¶ÈÉ´ÈÈµÈÆ¶ÊÆ²ÈÃ³ÈÆ¶ÈÇ¶ÊÆµÄÇ·ÅÅµÉÃµÇÄµÈÅ³ÇÅ³ÇÇµÇÇµÆÄ²ÆÃµÄÄ´ÈÅ³ÈÃ°ÃÄ´ÆÄ²ÇÂ³ÉÅ³ÅÉ¶ÅÇ³ÅÅ³ÆÄµÅÄ±ÇÅ³ÆÃ²ÈÄ³ÃÆ´ÆÁ³ÅÃ®ÆÃ±ÄÅ±ÆÃ³ÇÃ³ÄÄ±ÆÃ´ÇÆµÃÃ¯ÈÀ±ÃÃ³ÃÀ²ÃÁ®ÁÁ³ÆÂ²ÃÁ®ÆÃ®ÃÃ³ÃÁ®Æ¿±ÄÁ®Ã¾®ÂÀ²ÃÂ²Â¾¯ÃÁ¬Á¾°Ã¾­Â¾¯À¿¯ÁÁ²Ã¿®Á¿®Â¾®ÁÀ¬À¾®¿¿²¿Á¬¿¾©¾Â¯À¾­¿»±¼¾®¾¾®Á¼¬¿¾®À¿­½¹°¾½°¼»©¿¹®¾»®¿¼«½º­¼»°½¸®¿¹ª¾¼¨½½¬»»«¾¹¬ºº¬½»ª¾¸«½»«º¼©»¼«»¹¬½·ª»¹«½½®»¹¬½»­½»¬»»¬¼¼ª»¸ª»¸©»»¬¼»ª»º©¹¸ªº·«»»­¼»¨¹¶¨º¹ª¼¶©½¸¨º·§¼¶¦»¶«»·§»·¥º´¨·¸¨¹¸£·²¨··¦··¢¸³¨¸·§¹º¨¹µ¢·µ©¸³¤¸·¤··§·´£¸¶¦¶µ§´µ¥º²¢·³£·³£·³¬¹·¬¿¹«¾·«¾¹¬½º§»»®À·¬¾»¬Á¼ª¾¸¬¿½ª¾»©Â¹¬Á¶ª¿¹ª¿¹§Á»ª¾¸¬À·­¿·¬Ã»¨Â½¬¾º­¼»¬¾»®¿º¬Â¼¬Ã»¬À»­¾»¬Ã½­¿»¬¿»­Á¿°Á¼°Â¼©¿¼¯Á»±À¼®Á½¬Ã¼®¿½²Ã¿¬Å¿®Âº­Á½¬Å»®À¾¯Â¼­Å¾±Á¼±ÁÀ®Ã¾¯Â¼­Ã¾¯Å¼­ÁÀ®ÅÁ³È¾¬Å¼³Ã½²ÆÀ°ÆÁ¯ÅÁ²ÆÂ¯ÂÁ°Ã¿³Ä¾¬ÇÁ³ÅÂ²ËÁ±ÈÀ°ÊÅ³ÈÄ±ÈÃ³ÈÂ³ÌÂ±ÉÁ²ÈÀ±ÆÄ²ÆÁ³ÇÁ³ÅÁ²ÊÃ²ÃÃµÆÁ´ÈÁ³ÉÁ¯ÆÅµÈÀµÈÁ´ÈÁµÈÂ¶ËÂ³ÈÅ¶ÊÅ³ÊÃ´ÉÆ¸ÊÃµÊÅµÊÅºÊÆ³ÌÆ³ÊÃ¸ÊÈ³ÈÅ·ÊÃ·ÈÅµÍÆ¸ÉÅ·ÈÇµÌÇ·ÎÄ¶ÊÈ¹ËÆ·ÌÃ»ÈÆ¶ËÆ¸ÊÈ¶ÊÈ·ÌÆ·ÊÄ·ÌÈ³ÉÄµÌÉ·ËÆ·ÌÇµÌÈ¸ÊÆ¶ËÇ¸ÍÉ»ÌÈ¸ÍÆ·ÎÈ¸ÎÊµÊÇ·ËÆºÐÊ¶ÌÇ¸ÌÈ·ÍÉ·ËÊ»ÌÉ»ËÊ»ÎÈºÍË¸ÏÉ·ÍÈ»ÌÍ»ÎÈ»ÑÇ¸ÐÊ¹ÎÊºÎÌºÌÉÀÎÉ¹ÌÉ»ÎÍ»ÏÈºÎË»ÍÍºÍÊ¹ÎË»ÎÊ·ÌÊ»ÏÊ»ÎÊºÐË¹ÏÌ·ÐÌ¼ÑÌ·ÐÆ»ÑË¹ÎÌ¸ÒÌ½ÏÊ»ÐÍ»ÎÌ»ÒÍ¾ÑÎ»ÌÌ»ÐÍ»ËÍ»ÒÊ·ÐÌ¼ÐÎ¼ÓÊ½ÒÍºÑÍ»ÐÑ½ÒÎ»ÎÊ½ÓÎ¾ÑÌ¾ÐÈ¼ÒÎ¼ÍÌ»ÐË¿ÐÍ»ÐÊ¹ÐÌ¹ÍË¾ÐÌ»ÓÍ»ÐÏ¼ÓÌ¿ÒÊºÕËÀÎË¾ÐÍ»ÐÍ¸ÑËºÐÌ»ÐÎ»ÒÍºÓÊ¼ÐÌ»ÏÐ»ÒÎ¾ÎË½ÑÎ½ØÎÀÎÐÂÖÎÁÑÐ»ÒÐÁÕÌ¼ÑÐ½ÐÍ¿ÑÏ¾ÑÍÁÒÑ¿ÒÓÁÔÎ¼ÒÍ¾ÒÌÀÐÐ¾ÓÐ¾ÒÐ¾ÓÎ»ÒÐÁÓÐ¼ÕÐ¼ÕÌ¼ÒÐÀÕÌ½ÓÐ¾ÐÐÀÔÑ½ÔÎ¾ÑÐ¿ÕÐ¿ÓÎÀÒÐ¾ÖÎ¾ÓÐ¾ÔÒÀÒÐÂÓÐ¼ÓÌºÓÑ¾ÔÐÁÕÏÀÑÐ¿×Î¾ÕÒÀÔÐ¿ØÒ¼ÐÎ¾ÒÏ¿ÐÎ¹ÎÈºÎÇ·ÍÊºÈÈ¹ÆÆ³Áº¬·¡¨|ndg_{dbwd[t][qg_wnfzx`|oqbn_ro|uiob{kdwl]zf]wndund{qbzkgxkbzd_zkbtnbwkbxffxoiwr_zbftqdrkbzf]tg_rd_td_o[[of`xi_uikuoi{d[wb]rb]n`Oq][ok[td[rb_obWrf[wd[ob[q`Yu_Yo`WnfUq`So`]of`wbUkbYod_ubYr`]o`Uld[t_[ob`oi[r]]q_WodYn_QqdYn_Yu[Qq`Sn_]q_[lY[niYrbSob`qd[of[qd[tg[o]Uo[Wl[Qo[[n`[n][ngUq_[qd]r``rb]q_[q_[qi[tf[q]Yq`[qb[od[u`Wndbrb[r_Wq[]od_{rdzro{ª ¬¶«´º­º½´¿Ì¹ÈÌ½ÏÊ½ÌÑÀÒÐÁÎÏ½ÑÍ¾ÎÎ½ÑÒ¾ÐÐÀÔÐ¾ÒÒ½ÒÐ¾ÕÒ¾ÔÎ¿ÒÎÁÒÎ¾ÒÐ¾ÕÎÁÑÏ¾ÏÐ¾ÓÐÀÒÎ¿ÐÎ¾ÕÌ¿ÒÏ¼ÑÐÀÓÏ¼ÐÍ»ÑÎ¿ÑÎ¾ÎÍ¿ÔÑ¿ÐÍ»ÑÌ¿ÒÌ¿ÏÎ¾ÕÍÀÑÍ¿ÒÎ¾ÐÎ»ÒÎ¾ÓÌ¾ÏÐ½ÐÍ¾ÎÐ»ÒË¿ÒÌ¾ÏÎ¿ÐÊÁÎÍ¿ÍÏ¾ÐÌ¼ÎÌ¾ÏÎ½ÑË¾ÎÌÀÒÎ½ÓÊ¾ÐÌÀÎÊ»ÎË¼ÐË¾ÎÌ¾ÑÍ·ÐÊ½ÎÍ¿ÒÍ½ÐÍ¿ÑÍÁÓË»ÐÊ»ÒÐ¿ÐÌ¼ÑÌ¾ÌÍ»ÐÏ»ÐÌ»ËÌ¿ÍË»ÏÌ¼ÒÈ¼ÐÈ·ÏÆ¼ËË»ÐÌ»ÏÊºÐÊ»ÊÉ¼ÍÊ¸ÌÊ»ÌÈ¹ÎÍ·ËÈ¼ÍÉ½ÍÊ¹ÎÈ¹ÈÊ¸ÍÇ¸ÊÇ¹ÊÆ»ËÈ¸ÍÆ·ÌÊ¹ÊÉ·ÎÆ¸ÊÈ¹ÍÇ·ÌÄ·ÌÄ¹ÊÈºÊÅ¶ËÅ¶ÊÇºÈÉ·ÌÅ¸ËÆºÈÆ¶ÊÆ¸ÉÆ·ÈÈ´ÉÆºÊÅ¹ÉÇ·ËÅºÊÈ·ÌÆµÊÅ¶ÈÃ·ÇÆ¸ËÈµÆÇ¹ÊÉ¶ÊÄ¸ÈÅ´ÈÅ¶ÉÈ·ÉÆ·ÆÂ´ÈÃ·ÊÇ·ÆÆ³ÈÆµÊÃ³ÈÅ¶ÈÃµÉÀµÆÃµÆÅ¶ÈÃ³ÇÁ¶ÃÁ²ÊÁµÅÃµÅÄ³ÉÁ³ÅÀ³ÅÁ³ÇÀµÂ¿±ÃÁ²Æ¿µÄ¿±ÅÀ²ÆÂ±Ä¿³ÅÀ³Å¿°Æ¾³ÂÁ²Â¾°ÄÀ³ÃÁ³Ä½±Ã½³Á½²Å¾±Å½³Á¾³À»±Ã½µÁÀ°Ã¾¯Â¼°Â¼°Á¾´Â½°Áº®Á¿±Á¿®Ã»¯¾¼³Â¾³Ã»­Â»³Â½®Á¿¯¿½¯Â¼²¿»¬Á¼®À»®À»¯Á»®À»¬½»«Á»®¿»¯Áº®À»°Á»±Á¸®¾¸®¾¼¬À»®¿¶¬¿¹«¿º¬¿·¯¼ºª¼»ª½¶­¾¸ª¼¸«¾¸«»¸«¾¹«¼·ª»·®¼¹©½·©º·¬»·¨¼µ­½µ«»¸§»¸¨»³©»·¦¼°¥³´£¸º¨··¥¾·§º¶¥»·§º·¨»»¥¸¹¡»¶¤¼¸£º¸£¹µ¥¸¸¨¶»¤»¹£»¸¨½·¥¹·§º·©»·¨»·¨½·¦º·§½¹¦»µ§··ª½·¡¼·¥º·¥½¹¥»·¨»º«¼»¨¾¸ª»¸§½¸«½»¦»¸§¼¸¨À»£»·¤¹»«¾¸£»·©¾º§À»¦½¹ª»¼©»º¦¿¼§¼»©¾»¨¾¹§½½¬¿¹¦¼»§¾½¬À¾«¾¹§¾ºªÀ»«Á¾¬¾½¬Ã»«¾¿¬¾½«Á¾§Á½¬ÁÀ¬ÁÀ¬ÄÂ¬Á½®Â¾¬ÃÁ«Â¾±ÄÁ®ÆÀ¬ÃÁ¬Ã¿®Ä¾¬ÄÁ®Ã¿«ÄÄ°ÁÁ«Â¾¬ÃÂ¬ÄÀ®Ã½¯ÃÁ®ÄÁ°ÄÁ²ÈÃ®ÄÃ®ÃÄ³ÆÃ°ÈÂ®ÂÃ²ÄÁ°ÄÁ¬ÄÃ¯ÂÃ°ÆÃ°ÆÃ±ÃÄ²ÈÂ²ÆÂ²ÃÁ°ÇÃ®ÃÆ±ÆÄ°ÈÆ®ÈÃ±ÆÄ·ÉÃ²ÈÄ¯ÈÇ³ÄÄ±ËÃ°ÇÇ³ÆÆ­ÈÃ²ÇÅ±ÆÆµÆÁ°ÈÃ²ÄÅ´ÊÆ³ÊÇ³ÄÇ³ÈÆ³ÈÄ³ÇÇ´ÊÅ´ÊÇ·ÇÆµÆÊµÊÇ³ÉÈ³ÈÇ¶ÊÆ´ÊÇ·ÆÈ²ÊÆµÉÆ³ÊÆ³ËÈ·ÊÈ·ÈÈ¶ÉÆ²ÈÊ·ÉÈ¶ÌÈ³ËÉ·ÌÈ¹ÈÊ¶ËÇ¶ÊÆµËÊ´ÉÈ·ÍÅ´ÌÇ¸ÊÉ¶ÊÈ³ËÊµÎÇ·ËÊµÎÇ¸ÌÇµÌÉ³ÍÈµËÈ·ÊÊ¹ËÈ¸ÌÉ·ÊÉµÍÊ¹ÍÊ·ÍÈ¶ÊÈ¹ÌÉ·ÌÈµÊÊ¸ÍË·ÌÊ¶ÊÈ¸ÌË¶ËÊµÍÊ¸ÊÇ·ÌÎ¶ÎÊµÌÊ´ÌÊ¸ÊÊ·ÌÉ·ÌÉ³ÏË¸ÈÊ¸ÎÊ¸ÍÈ¸ÌÈ·ÌÊ¹ËÆ¸ÌÊ·ÉÊ¹ÏÉ»ËÉ·ÎÈµÌÈ¶ÍÈ¶ÌÉ¸ÎÈ¶ÊÈ¸ÌÌ¹ÐÎ¸ÌË¸ÌÉ´ÊË³ÌÊ¹ÏÌ·ÌÌ¹ÎÌºÎË»ÎÌºÏË·ÌÌ»ÎÌ·ÍÌ¶ÎÌºÎÎ»ÎË·ÏÈºÌÌ¸ÎÎ»ÌË½ÑÎ»ÏÌ¸ÎÎ½ÏÌ¹ÑÎ»ÎÌ»ÎÏ»ÏÍ¼ÎÌ·ÎË·ÎÎºÏÌºÎÌºÍÎºÎÍºÎÌ»ÌÍ¸ÎË¹ÐÏºÐÌ·ÐÎ¼ÏÌºÍÏ»ÏÎ¹ÌË¶ÏÌºÏÍ¸ÎÏ½ÐÌ»ÎË¹ÒÎ»ÏÎ»ÑÊ¸ÎÌ·ÈÊ·ÈÇµÃÄ°ÁÅ®¼¯§³ª¬ zod{gYzfUt]Ql`Qt[QkbSngWqr`tg|lzf|x_|ibtkYxiSqdYnbMobSndYnl_qgQtbSnYMlbOqbSil_nz]ql]nn[qg[rdUon]ldWobOg[Sg`Mn[MgYYigSn`UgbUidUk[Qk`Of]Qg`QkdQgbUnbQk`OgbUgdUq`Sl]SkfOkdQi]QibKgWQg_SgdQk_MdYMi`Sg_Mg[Kk`Uf`MgYQg`Sg`SkYOd[MgYKgWMb_OfYOg]QfbOg`Il_IbbSl`QidQg`WidOidKi_OlbMg`IgUMgSMfWIg`Od_Mi`Qn_UibMi`UldQi`Sk`SidQlbSi`Ui]Qk`WibQk]Sb_Qg]KgWKf[QkdSniWtg]wtdt¦§«¼¬ºÃ±ÀÊ¶ÆÏ»ÌÌ·ÊÌ»ÇÈ·ÊÍ¸ÊÎ¸ËÎºËÎ¾ÎÎ»ÍÍºÌÎ½ÍÑ½ÎÍ¸ËÎºÍÍºÍÌºÎÎºÍÌ½ÎÌ»ÎÍ»ÎÌ¸ÊËµÌËºÊÊ»ÌÍºÍÊ·ËÍ½ÍÍ»ÏÌ¸ÊÌ»ËÍ¹ÌÌ»ÎÎ»ÎÍ¼ÍÊ¸ËÎ»ÎË¹ÐÍ·ÎÈ¼ÎÍ¸ÎËºÌÊ¹ËÊ»ÌË»ËÊºÊÊ·ÎÉ¶ËÌ»ÊË»ÌÊ¶ÌÊ·ÊË¹ÊÊ¹ÊÊ·ÌÊ·ÍÎ·ÌÈºÊÆ¸ÎÉ¹ËÉ¸ÌÌ¹ËÌ¸ÌÊ¹ÌÊ»ÌÊ¸ÌÌ·ÊÈ·ÊÊ·ÍÈ·ÌÉ»ÌÉ·ÊÉ·ÌÊ·ÊÌ·ÊÈ¸ÊË¸ÌÈ¶ÇÉ³ÈÇ·ÇÈ¸ËÊ¸ÈÈ·ÆÇ¶ÉÈ¶ÍÇ¸ÉÆ·ÊÇµÆÆ·ÇÄµÇÉ·ÊÆ·ÇÇ·ÇÆ·ÈÈ¸ÇÄ¶ÆÈ³ÇÅ³ÇÆ²ÆÃ²ÈÄ²ÆÃ³ÆÃ³ÆÆ²ÆÆ·ÊÄ³ÈÈµÇÅ³ÆÄ¸ÆÃ³ÈÅ·ÈÃ³ÈÄ¶ÈÆ´ÇÁ³ÄÇ³ÆÅ¶ÅÃ°ÃÃ¶ÄÄ³ÇÃ±ÃÅ²ÅÄ°ÆÆ±ÅÃ·ÆÃ²ÃÄ³ÄÃµÆÈ´ÆÁµÅÃ°ÃÁ³ÆÁ³ÅÃ²ÃÁ²ÆÀ±ÄÄ³ÂÄ±ÃÀ¯ÁÁ³ÆÁ¯ÃÁ¯ÁÃ°ÁÁ®ÆÁ±Ã¿¯ÁÂ²ÂÀ²ÃÁ°Â¾±Â¾­ÁÀ¯ÁÁ±ÃÀ²Ä¾®Â¾¬À¿®Ä¾®ÁÀ°Á½­À½­¾½¯Á»¬ÁÀ©»¾¯Ã¾®¾½ª½º®½¾¬¾½­½¾®Àº¬À¾©¼¼®À¼©½¼¬¾»«¾¼¬¿º¯½¹«¾·¬»»«¾¼­½¸ª¼¼«½¸«¾º¬¾»¨¾º¨¾·¬¾½«½½¯¼¸¬º·¬ºº«º·¬»»«½·«½»«º¹¨»·¬»¶¥»¸¬¼º©º·«»¹ª·»¨¹¹©»·©¹¹¦½º«¾·§·¸¦½¸¦¹²¨¹·¥¸·¦»µ¦¸µ§ºµ¥µ¶¦¸µ©··¥¹³¥·¶¦¸´ ¹·©¸´§¸¶¤¶³¦»´§·³¢¸´¦³´§¸³£¹³¤³µ§·¯¨·¹¬¾»©Á»¨»¹ªÃ¹ªÀ»¬Á·¬¾¸®½¸¬Áº­À¹¨¿º«Áºª¿º¯Á¼¬À¸©¾¾®À¼¨Á¾ªÀ»®À»­À»®¿»ª¿¼ªÁ»«¾»®Áº¬À»¬¿»­¾º¬Ã½©Ä»­Á»³Å¾©Ã»«Á»­Ã½²Ã¼­Á¼ªÃ¾®Á¾¬Â¹¬Ã¼­Ã»¬Â¼±Å¾¬Ã¼®Ã»©À»¬Á¾®Æ¼®Â»¬Á½¬Â¾¯Ã¾®Ç½¬Ã¾®Ã¾¯ÅÀ±ÄÁ¬ÂÀ³Ã¾¯Å¾±ÁÂ®ÅÀ±ÆÀ³Ç¿±ÆÂ°ÇÂ¯Æ¾²ÅÁ³ÆÀ²ÇÀ³ÇÃ°ÆÁ®ÈÁ³ÇÀ³ÆÁ±ÊÁ²ÈÂ³ÈÃ³ÉÅ¹ÉÂ³ÆÃ³ÈÂ³ÈÁ³ÉÅ³ÆÂ²ÆÂµÈÅ²ÇÂ´ÊÃ³ÈÆ¶ÊÄ¶ËÆµËÇ²ÊÆ³ËÁµÈÄµÉÆ´ÈÆ´ÈÆ·ÊÅ´ÌÃ¸ÌÈ·ÌÆ¸ÎÇ¶ÊÃ´ËÈµÉÆ´ÊÈ·ÊÊ·ÏÈºÌÆµÊÇ·ÌÆºÎÈ¹ÌÈ¶ÍÊ¹ËÆ¶ÌÇ³ÌÉ¹ÏÉ·ÎÈ»ÎÈ¼ÎÊ¸ÎÅ·ÍÆµÎÈ·ÎÈ¶ÎÉ»ÎÇ·ÌÈ¼ÍÌ¶ÐÈ¹ÌÊ¼ÍÈ¹ÑÊ·ÌÌ¹ÌÌºÍÊ¹ÎÉ»ÎÊ»ÎÊ¶ÐË»ÐÊ»ÍÊ¹ÎÊ¹ÌÊ¼ÎÊ»ÐÈ»ÍÈ½ÏÌ¶ÎÈ¾ÐË½ÐÈ·ÍÊ»ÎÌºÎÊºÎË»ÒÈ¹ÎÌ½ÒÊ»ÑÈ»ÎÍ»ÎÌ»ÐËºÐÌ»ÐÈ¹ÐÏ¹ÐË¹ÒÉ¸ÓÎ¼ÐÊ¹ÑÉ¼ÏÍ¹ÓÏ¼ÏÏ»ÑÍºÑÈ»ÐÎ¼ÕÊ»ÐÎ¼ÑÏ¾ÒÍ¾ÐË½ÒÌ¼ÓÊ½ÑÏ¼ÐÊ¼ÒÌ»ÒÈ½ÑË¾ÎÎºÒÎ¼ÌÌºÑÌ¼ÒÌºÐÎ»ÐÌ¼ÏÌÁÐË»ÕÉ½ÒÈ¼ÐÎ¼ÎÏ¹ÏÌ¾ÒÊ½ÒÎ»ÖÌ»ÑÊ¾ÕÊ¶ÐÐ¾ÐÍ½ÒÐ¾ÑÐ»ÐÌ½ÐÌÁÑË»ÏÌ»ÐÐ½ÒÎ½ÔË·ÐÎ¾ÓÐ»ÓÐ»ÓÒÀÓÏ¼ÓÎ½ÕÏ¿ÕÑÂÓÏÁÑÓ½ÓÒÁÕÐ¼ÕÐÀÕÑ¿ÒÐ¿ÒÐÀÔÐ¹ÕÐ½ÕÒÀÔÐ¿ÕÐ¿ÕÑÁÒÑ½ÖÐÀÒÑ¾ÓÐÁÕÏ¿ÖÏ¾ÕÑ¾ÕÒ¼ÕÒ½ÓÐ¿ÒÐÁÓÎ¿ÕÒÃÕÓ»ÓÏ¾ÒÒ¿ÓÐÀÕÐ¾ÕÑÂÔÔÁÕÒ¿ÖÏÀÒÒÂÒÐ¿ÓÍ¿ÐÈ´Ì¾±Æ³¬½¬ ¶¥{|irfk`{i[w]Yrb]tg[wn`rtb~wd{zuzkoi|obznf|q_|i]xf_wlgtk]xl]wi`rg]uf[wd[ukr{ifbwgbzg[wg_tg_ri]ubUq`YobSo]Yn]]ogUwg_u_]tb[tdYwd_oi[ub[xd_qbYrg_ub`tnduo]ug]ui_wb[ukbugWuk[td]ud_rbWubSug[wf`w`[u`[rdUq`St`YodWodYq[[nWUq`Qq`UnbWtd_tbSrf[lf]wiWtfYtfYw`[rf`ufYt`UwiWwbWqf[u`]q]So_QodYndWud]wn[tk]qg`uf_ul_zkYwfYubbtg_uobzqbwg[|][qb[odSqY[n_WwdYxi_xl`xldo`{tª¦Á³¶Å·¾ÌºÇÌ¿ÆÈ»ËÆ¹ÈÉ·ÈÍ»ÍÐ¾ÍÍ¿ÓÐÁÑÐ¾ÓÏ½ÑÑÀÔÒ¼ÒÏ½ÒÒ¿ÖÐ¿ÕÓÁÒÌ¾ÓÓÀÕÒ¿ÏÐ¾ÏÐ½ÒÑ¾ÒÌÁÒÎ¾ÓÒ»ÓÒ¼ÐÐÂÔÒ¾ÓÎ¿ÒÒÃÓÎ¾ÕÍ¼ÐÌÃÒÐ¾ÒÏ¾ÓÌ¿ÒÎ»ÓÍ½ÐÐ¾ÒÌ¿ÐÏ¾ÒÎÀÑÎ¾ÒÎºÒË¾ÓÐ½ÒÏÁÎÍ¾ÐÌ¿ÏÍ½ÏÎ½ÐÎ¾ÏÎ»ÐÏ¼ÎÍ½ÑÏÁÐÊÀÓÌ¾ÐÎ»ÓÎ¾ÐÌ¿ÐÎ¾ÐÎ¼ÒÌ¾ÐÌ¿ÑÎ»ÏË¼ÐË»ÐÌ¾ÍË½ÎË¾ÒÍºÎÊ½ÐÌ»ÒÏ»ÎË¿ÒÇ¼ÎÌ¼ÐÎ½ÐÎ¼ÍË»ÏÌ½ÎÉ¾ÍË¶ÎÆ»ÎÊºÍÈ»ÌÊ½ÍÆ¹ÌÌºÍÊ¹ÐÈ»ÌËºÏÈµÎÈ¹ÌÉ¸ÌÅ·ËÇ¹ÏÈ´ÎÈ¶ËÊ·ÊÉ¶ÌÊ»ÍÈ·ÉÇ¹ÊÈ¶ÎÈ¸ËÇ»ÌÆ·ÌÆ¶ÌÈ¹ÊÉ¶ÍÈºÐÈ¹ËÈºÐÇµÊÃ·ÌÈ¹ÌÉ¸ÌÃ·ÌÉºÌÆ¶ËÅºÌÆ¹ËÅµÊÈ¹ÈÈµÈÅ·ÌÄ·ÈÇ¶ÆÇ·ÊÆ·ÉÄ¶ÇÆ·ÊÅ·ÆÃ¶ÉÆ·ÇÂ·ÈÆ¹ÊÈ¶ÉÃ¶ÆÆ´ÉÃ´ÊÄ¶ÇÁµÆÃ³ÆÁµÈÁ¶ÅÂ³ÉÂ´ÆÂ´ÆÄ¶ÈÃ´ÆÃ·ÅÃ´ÅÄ³ÅÁµÂÀ´ÇÁ³Ä¿±ÁÁ·ÁÁ³Æ¿´ÂÁ°ÆÁ²ÅÁ³ÅÁ³Ã¾¶Æ¾²Ã½²ÇÁ¯Æ¾¯Ä»¯ÅÂ®ÄÂ³Â¿¯Å½²ÄÁ±Ä»¬Â¼³ÄÂ¬Â½±À¼´ÅÁ°Ã¿­Á¾³Â¾²Á»°Â»¯ÃÁ¬Ã¿®Á»²Áº­Â¾¬À»±Á¾±Å¹­À¾±Á½®Â»¬Á»®Àº¬Á»­¾¸°¾·°Ä¾­¾»­À»¯¿½¬Áº¯¾¾®¾½ªÁ·­¾»¬¾½¬Á¹¬½·¬ºº¬¾¹ª¼¹¬»¸®¿¹ªÀ·ª¾¹«À·§»¸¨¾¶¬½¶ª¼·¬½º¬»¹ª¾·¬º¸ª»·ª¼¶¬½¹¦½¯¥µ´¤¹µ¡¸»£»¶£·¶¦º»¤»·¢¼¶¥º¸¤¼µ¤¹´¦¸·¥º·¦»·¥»·¤¹º¦º¸£¹º§»»¥½·«¸»¨»·¡»¹§¾º«»¸¦¾µ§»·¦¼½§½¸§½¸§º»¦¾¹¦½·§»¸§¾¸¬¼º©»¹¨¾¹©½º«¾¸ª¾¹§¾·¨»»©¾»§¼»§¼¹«Á½¨¿¹©¾»«½·£Áº©»¼©¼º§¿»§¾¸§¿º­¾¾ª¾º¬½»«Á»ªÀ»©Á»¬Ã¾©À½°¾Á«Á»«À¾­½¾¯¿¾¬Á»ªÁ½®Á¾¬Ã¿¬Â¾®ÄÂ­Æ½¬À¾­Á»¬ÁÁ¬ÄÀ±Ã¾«Á¾¬ÄÃ°ÆÀ±ÄÀ§ÄÀ³ÄÁ®Æ¿¬Ã¾®ÄÃ¯ÃÁ®Ä¾±ÃÁ¯ÆÄ±ÅÀ±ÅÃ¯ÅÁ°ÇÁ¯ÇÆ±Ã¿¯ÈÁ±ÃÁ²ÄÄ°ÈÆ²ÆÁ²ÆÁ²ÇÃ±ÆÄ²ÇÃ±ÆÃ²ÅÃ´ÈÄ²ÆÄ´ÇÅ°ÆÄ²ÈÆ±ÆÄ°ÄÂ³ÊÅ²ÈÇ±ÇÃµÇÈ´ÇÈ³ÈÂµÊÈ±ÉÄ´ÊÆ´ÉÄ³ÉÅ±ÊÆ´ÈÇ´ËÈµÊÈ³ËÇ´ÅÇ³ÊÈ³ÉÆ¸ÊÊµÊÆ³ÈÆ¸ÊÇ³ÈÈ³ÆÈ¶ÉÉ²ÊÃ¶ÆÆ³ËÈ²ËËµÉÆ´ÉÇ·ÉÈ²ÆÆµËÇµÉÈµÈÈ¶ÉÅµËÈ°ÈÆµÉÈ´ÎË·ÉÈ·ÊÈ³ÎÈ¶ÌÊ¶ÍÆµËÆ±ÊÈµÉÊµÌÉ´ÍÆ³ÊÈºËÈ³ÎÆ¸ÊÆµÊÊ·ÏÉ·ÊÇ·ÈÉ¶ÍÊ·ÌÌ¹ÌÈ·ÎÈµÊÊºÊË·ÍÈ·ÌÆ·ËË·ËÊ´ÊÊ»ÊÆ·ÊÇ·ÍÊ·ËÉ³ÊÊ·ËÈ¸ËÉ·ÈÈ´ËËµÌÉ·ËÊºÎÊ·ÍÉ·ÌË¸ÌÉ³ÎÉ·ÈËµËÌ¸ÌÊºÍË¸ÎÌ¸ÌÈ¶ÌÉ·ÌÉ¶ÌË·ÏÊ·ÌÌ·ÎÈ¶ËÊ¹ÍÌ¶ÎË¹ÍÌ¸ÊÊ·ÐÍ·ÎË¹ÌÏ»ÎÌ»ÍÎ»ÎÌ¹ÌÌ¸ÍÌ·ÍÐ»ÏÐ¾ÎË¸ÎÎ¹ÎÎµÌÊ¼ÌÎ´ÑÌ´ÌÌ¿ÒÌºÐÎ»ÐÏ¸ÏÌ»ÍÏ¹ÑË¹ÌÎ¿ÏÐ¹ÐÎ¼ÑÎ»ÒÌºÎÍ¸ÎÍºÐÏ¶ÑÎ»ÎÎ¹ÏÏ»ÒÍºÎÌºÐÌºÎÊ¶ËËºÌÌ»ÐÎ¸ÐËºÌÎ¸ÎÎºÐÌ¾ÎË¹ÏÍµÊÊ¶ÊÆ°Á·¦µ¥¥{zgk`k[|k[zgYqgUw[Ql]Ki]Ql_SkgQnd[onYw|fztwgzdwkYwiWrgYqgUn`Ul`Ul`QlfSqgUkiWfgYrbQnldrtdugYqdSn`Ql]Qk`SgdQk`Qk]Mg[UgYKi[MgfQgbOl_SkWOg_Mf]SkdSg_Sl]MlWQgiQobSldfitQn`Qr`Uld[qQrgWk`Uk_Mn_SkbQn]Ml`QidWn`Kk_Qi`Qg_KiUKfYKb`Of_Qd[MiWKg]Qf[Og`QidOlfSidSl`Mn`OidOi`Qn`Qk`OodMqfQl`Kk`Mg_Qi`Og]Fi_Uk]Wf_Ol_YidQiiUi_QkdQkbUl`Oi_Qi`Ug`]ndYk]SgYMfYMfWMiYMgSMfYOgbQi`Ul`UogWog]txd¡£³§¬¾¯»»¬¸¼­»¿®ÁÁ²ÄÅ³ÃÇ³ÄÇ¶ÈÆ¹ÌÊ¸ËÎ»ÌÍ¸ÌÍºÌÌ»ÏÏ»ÎÎ¹ÎÐ»ÎÏ»ÎÌ½ÎÌ¸ÌÎ»ÌÊ¾ÌÍºÏÌ»ÐË¸ÎÎ¹ÌÌ¹ÎË»ÍÐ»ÎÍ½ÏÊ¹ÌÎ»ÎÎ½ÎÌ¼ÌÏ·ÎÊ¸ÎÌ¼ÌÍ»ÍÌ»ÏËµÍÌ¹ÌÍ·ËÊ¹ÉË·ÌËºÍÊ¹ËÌ¹ÏÉ·ÌÌ¸ÊÌ¸ÌÊ¸ËÎ·ÊË·ÐË¸ËÊµËÈ¶ÉË¸ÌÈµÌË·ÈÌ»ÌÌ»ÌÊ¶ÌÉ·ËË¹ÍË·ÌÈ·ÈÍ¸ÌÈ¸ÆÈºÊÌ·ÌÈ¸ËÉ¹ÊÊ¹ÈÊµÊÇ¶ÊÌ¶ËÈ¹ÆÈºÆÈ¹ÈÈ·ÊÉ´ÈÇ¶ËÉ´ÈÈ´ÅÆ·ÉÆ·ÊÄ´ÈÈµÊÈ´ËÆ¶ÇÅ¶ÈÇ¶ÊÄ³ÈÄ´ÇÈ´ÇÃ³ÈÆ´ÈÄ´ÈÆ´ÇÅ³ÇÈ´ÈÇ·ÊÆ³ÉÆ¶ÉÄ±ÆÅ³ÆÃ³ÆÃ³ÇÅ³ÇÄ³ÆÄ²ÇÆ³ÆÄ³ÈÈ´ÈÂ²ÄÅ²ÇÆµÆÄ³ÈÃ²ÆÃ°ÄÄµÆÃ²ÄÅ°ÅÃ³ÃÃ´ÈÁ±ÄÃ±ÄÂ°ÅÁ³ÇÄ³ÄÀ±ÅÁ¯ÃÆ¯ÆÀ³ÃÁµÄÃ­ÄÃ®ÃÂ²ÃÃ°ÂÁ±ÁÂ±Ã¿®Ã¾­Á¾¯ÁÁ¯ÃÀ­¿¾®ÀÁ­ÀÂ­ÃÁ¯ÁÁ®Ã¾¯ÀÀ³ÁÀ°Â¾­Á¿®Á¿­À¿¬Ã¼¬¿Á®ÃÁ¯À»¬¾¾«¼¾­¾½¯Á¿«ÀÁ®Àº¬¾»­ÀÀ®¾»«Àº¯¿¾¬À¾«½¼¯½½®¾¾¬¿»¬½¾¬¿º©À»¨¼½ª¼º«»»®»¾®Á½ªÀ·ª»»ª¼¸«½¹¬½½«»»ª¼¾¯½¼§½»«»·«»»©½¹¦¾¹©º·©½»«¼»¨¼¶ª·¸§»¸«»·¨»·¥º¸§¹·«»¹©¼¸©¼·¦¸¸¦»¸§¹¸¨¸¶§·´¨½µ¨º¸§¸·§¹´§¸·¨»·¤¸·¤¸µ§·³¥¶´£µ±¨·µ¦¸µ¤º¶¥µµ£·´¥¶³£¹³ ·µ ·²§µ´©¹»¨À»¬Á½¬Á¹ªÂ¼°Á¼¬Á»¬Ã¸¬½»¬Á¹«Á·¬¿¼¬Á»©Á»­À»¬Áº«À»¯Á»®Á¼¬À¸¬Áº¬ÂÀ¬Ã¼­Ã¿¯Â»­Â»¬Á¾ªÁ½«Áº¬Â¿¬Ã½®Á»©Á¾®¾Á­Â¼«À½­Â¿¬Ã¾¬Á»¬¿»ªÆ¼¬ÃÀ®Á¼«Á¾°Ã¼®Á¾°Ã¼®Ã»©Ã¼¯Â½¬Ã¾®Ã»°Ã¾¬Ã½³Æ¼®ÂÀ¬ÇÁ²Æ½­ÃÁ°Ã½¯È¾®Ã¿°ÇÁ®Ä¾²ÂÀ±ÇÁ¯ÅÀ±Æ¿³ÊÃ°Â¿³Æ¿°ÈÁ²ÊÁ³ÄÄ´ÉÃ²ÈÂ°ÉÀ¯ÇÂ°ËÂ°ÆÁ®ÈÃ²ÈÃµÈÅ³ÉÄ³ÊÂ³ÇÁ³ÇÂ´ËÁ´ÈÅ´ÍÆµÊÄµÈÂ´ÊÅ³ÉÆ³ÌÆ·ÈÅ¶ÏÈ·ÌÆ·ÎÅ¶ÈÁ³ÌÆ·ËÃµÉÇ³ÍÆ³ËÄ·ÉÊ¹ÍÆµÌÈ²ÎÇµËÆ·ÌÇµÌÆ¶ÌÊ¶ËÈ·ÌÄµÊÄ¹ÌÇ¶ÊÇ·ÍÊ¶ÌÇ·ÌÆ»ÊÆ¹ÏÌ¶ÍÈ·ÎÊ¹ÌÊµÐÇ·ÍËµÎË¹ÏÈ¹ÏË¶ÐÌ»ÌÊ»ÌÌ¹ÑÊ»ÐÌ¹ÎÉ»ÎÎ¹ÐÊ·ÍÈºÎÉ¹ÐÍ¸ÌÉ»ÎË¹ÎË»ÎÊ·ÎÌ»ÐÌºËÌ»ÎË¸ÐË·ÌÊ»ÐÊ½ÎÊ¹ÏËºÐË·ÐÌ¹ÎÊ»ÐÉ»ÕÊ»ÎÊ»ÐÌ»ÐÉ»ÎËºÐÉ»ÎÎºÏÊºÕÊ»ÎÊ¶ÑÊºÐË·ÎÍ»ÒÌ¾ÐÎ»ÓÎ»ÖÎ¼ÐÌ½ÐÎ»ÐÎ¹ÒÈ»ÐÍ¾ÎÐºÑÏ¼ÏÌ¼ÒÐ¾ÕËºÍÊ¹ÐÊ»ÑÍ¼ÏÐÁÔÍ»ÐË½ÐÐ¼ÑÊ¿ÓÌ¼ÑÌ½ÒÎ»ÎÌ½ÑÌ»ÐÌ¿ÔÐ»ÒÌ¾ÒË¹ÑÌ¼ÒÍ¾ÏÐ¿ÒÊ¼ÏÑ½ÒÎ»ÒÍ¼ÓË¾ÓÎºÐÌ»ÒÐÁÐÌ¿ÓÏ¼ÓÏ¿ÍÏ¼ÕÎ¾ÓÐ¼ÑÏºÓÏ¾ÕÍ¾ÔÍ½ÕÐ¿ÑÌÁÒÏ¿ÒÎ¼ÒÐÀÕÐ»ÓÓ¿ÓÑÁÒÏÁÕÎÁÕÒ¿ÖÐ¾ÕÐ¾ÕÓ½ÕÍÂÒÐ¿ÓÎÁÓÐ½ÓÐÀÕÐ¾ÖÐÁÕÒÁÕÒ¼ÔÎ¼ÓÕÂÖÓÁØÐ»ÓÒÃÕÒ½ÕÐÀÔÐÁÔÒÁÒÓÂÕÏÀ×ÒÀÕÒ»ÓÐ¼ÒÕÂÓÐ¼ÓÐ¾ÒÐ¾ÒÒÁØÎÀÑÏÁÓÎ»ÏÍ¼ÌÆ³Ã°¥¸¤xwxfrbn`{r_g`wdYwg[wl_wl_rk_zi[rg`zr[xql|~qtqiwi~r_l`{obxl`{n[z_[wg`wi]tkdwq]un]xokxkn_{b[qf[x`Wt_[ol[wfYwbYtk_tf_xb`rq_|f]ui_qk_tfYuf[rf_nf]uiUzbbtobxqfzilxw`{n_wk`tn]xndwd_rk]{oYtl`wn`wg_wiYtf_tiWxfYx`]qfUr[Sl[Qrb[rd[qi[t`QqdYkb]oiYtg[uf`un`wo[{n`uk]zbY|gYti_zkYzk_wi[uk[ug[od`obUrd]of`xbWuf]t`[tn[wi[rf]rf]xdYxi`ul_qiWu`WtbWtb[r`[n_Sn_]qSYkb]obWo]_od[uiYzb`zod~{o¡ ¨ª® ¬·¦µ¿©½Á±ÂÀ±ÁÁ´ÇÄ¶ÈÈ¸ÌËºÏÎ¾ÒÑ¿ÐÐÁÕÒ¾ÐÑ½ÒÐÂÕÒÂÒÐ¿ÓÑ¿ÓÐ¿ÓÏ¾ÑÎÁÓÒ½ÕÐ¿ÑÍ¿ÒÒ¼ÒÎÀÕÐÄÓÑ¾ÒÏ¿ÔÐ½ÎÍ¿ÒÏÁÕÐÁÐÐÁÒÐ¿ÕÐ¾ÔÑ¿ÓÒÁÓÑ¼ÓËÁÒÐ¾ÒÎÁÐÎÁÐÐ¾ÒÎ»ÎÑÁÓÎ½ÐÌ¼ÓË¼ÐÎ¾ÓÐ½ÑÎÀÒÌ»ÐÏ¼ÒÊ¾ÎÍºÐÌ¿ÒÒ¾ÐÌ¼ÐÎ»ÐË½ÐÍ¼ÎÑ¾ÐË»ÐÌ¾ÐÌ¹ÏÌ½ÎÍºÒÊ½ÎÌ»ÏÍ½ÒÍ¾ÏÊ»ÑÊ»ÌÎ¿ÑËºÐÌ¼ÍÌ¼ÍÍ¾ÎÍ»ÍÈ»ÑË·ÌÌ½ÎÊ»ÍÊ¹ÎÈºÌÊºÏË»ÍÊºÌÊ»ÐÊ»ÐÈ»ÎÊ»ÌÉºÎÊ·ÌÇ»ÊÈ·ÍÈ»ÊÉ¹ÌÊ¹ËÈºÌÉºÌÉ¹ÌÆ¼ÌÅºÌÉ·ÌÈ»ÎÆ»ÌÇ¹ÍÉ»ËÇ·ÊÈ¹ÎÊ¼ÎÆ¸ÈÅ»ÌÈ¶ÈÆºËÉºÌÇµÎÇ·ÉÈ·ÈÌ¹ÌÈ´ÉÊ¶ÉÈ¶ÇÃµÊÇ·ÊÃ·ÎÈ¸ÉÆ·ÊÂ³ÊÇ´ÊÄ¶ÆÅ¶ÉÈ¶ÊÃµÊÇ¶ÌÆµÉÄ³ÊÄµÇÄ´ÊÃ·ÆÅµÈÄµÆÂ³ÇÃ¶ÆÂµÆÃ´ÇÃ´ÆÅ³ÇÃ³ÅÂ³È¿·ÇÁ±ÅÂ²ÃÃ´Ä¿³Å¾³ÃÂ²ÇÁ³Ã½³Ã¿´ÆÂ²ÃÁ³ÈÁ°ÅÁ±ÅÀµÈÀ³ÅÀ³ÃÂ²ÄÁ³ÅÂ³ÅÀ°Æ¾³ÁÀ¯È½±Ä¾³ÄÃ²Ã¾°Å½°Á¾­Å»®Ã¾´Ä½¯Ã½°Á¼¯Á¾°À¾¯Ã»­¿¾³Á¾¬Á¿±Á¾¯Ä¾®Á¾®À¼±Á¼­Á»¯Á»°Ã¾®À¼®À»¯Á»¬Á¼¯¿¹®¿»¯¾»«¿·®¼¼¬¿»®Áº°¿½¬Á»­½»®Â»¬¿»¨¾·­Áº­À»­À¹­»¶¬»»¬¾»¬¿·¬»¹¬¾·¬¾·¯»º¨¿·«¼¹­À¹©¾¶¬¼µ©¾·ª½·«À·«»±¡³¹§»·©··¦º·§º¸¦»¶¦ºº§»·¥»·¥¼·¥¹µ¢¸¶§º¸§¼µ¡»»¥¾¹©»¸¥»·¥»µ¦º¹§¼¸¥ºº¥½¶§½º©¿¶§»»§»¸ª½º©¼»¨½·¥¼¶§À¹¨»¸£¼¸¨½º¨¼¹ª¼º¨»»¥¾»¨¾¹©¼·§½º¥¼ºª¾¹¦½¼¦½·§¾¹ª¾»ª½»«½º¬¼¼¤¾¹¦¾¸§¾»«À»§¾»«»ºª½¾¦Á¾­Á½¬Á»§¿½¬¿½¨Á½ªÁ½­¾¼«Á¾ªÃ¼¬¾¾¬Ã½ª¿¼¬Á¾®ÃÀ¬Á¾­Ã¿°Ã¿§Á¾­Â¾§ÃÁ¬Å¼®ÄÁ±ÁÁ±Ã¾«Ä¿¬Ã¿®ÅÁ®ÃÁ°Ã¿±ÂÁ°Æ¿°ÃÁ­ÃÃ¬ÃÁ®ÂÃ±ÈÃ®ÃÃ­ÅÁ¯ÇÀ±ÇÂ­ÄÀ±ÅÃ«ÄÆ²ÇÆ±ÈÃ±ÃÃ®ÃÃ²ÆÄ³ÇÃ²ÇÃ´ÆÃ¬ÆÄ³ÆÆ³ÈÅ³ÆÄ±ÆÅµÊÆ²ÆÂ²ÇÃ±ÈÇ²ÈÃ¯ÉÄ²ÆÅ°ÈÄµÆÄ³ÇÈ³ÈÇ³ÌÆµÆÄ³ÇÊµÈÃµÈÇ´ÈÄ³ÈÄ·ÊÇ³ÈÊ³ÈÇ´ÊÆµÈÆµËÆ´ÇÉ·ÊÆ¶ÉÅµÉÆ´ÆÈµÊÄ´ÉÅµÊÈµËÆ·ÊÆ¶ËÈ·ÊÇ³ËÇµÈÆµÊÊ³ËÈ´ËÊµÊÈ´ÈÇ´ÈÈ´ÊÊ·ËÉ´ËÄµÈË´ÌÇµÌÊµÊÇ¶ÌÊ¶ÌÈ·ÌÉ´ÌÈ³ÈÆ¶ËÌ³ÏÌ¸ÌÊµËÎ³ËÈ·ÎÈµÈËµÊÌ·ËÈ·ÌÊ·ÍÊ·ÊÉ·ÊÈ¸ÌË³ÎÊ·ÈÊ´ÌÈ¶ËÉ¹ÎÇ·ËÊ¶ÊÊµËÉ·ÉÉ³ÍÇ¶ÊÊ·ÌÊ·ËÈµÊÊ¹ÊÊ¸ËÍ·ÌÈµËÉ¹ËÊ·ËÊ¶ÊÉ·ËÌ¸ÌËµÊÌ¹ÌËµÌÊ¹ÌÊ¹ÌÊµÌÊ¹ËÊ¸ÍÉ¸ÎÌ·ÌÊ·ÍË¸ÎÐ¸ÎÉ¸ÌÎºÒÎºÌÌºÎÊ»ÍÌ·ÎÌ¼ÌÎ¶ÏÌºÎÌ·ÒÎ»ÎÎ¹ÐÌ½ÌË¹ÎÎºÑË¹ÐÍºÎÎ·ÏÎ»ÏÍ·ÐÌ»ÏÎ¹ÎÍ»ÐÏ»ÒÌ¹ÑÏ»ÒÎ½ÐËºÐÌ¹ÌÐ»ÐÐ¸ÎÌ¹ÏÌ»ÑÏ¸ÐÑ¼ÐÎ¼ÐÌºÑÍ»ÐÎ»ÎÎµÎÌºÊÉ¹ÌÒ¶ÎË·ÌÍ»ÎË»ÎÐ¸ÌÉ»ÉË·ÇÆµÃº¦¸¤wgo]kY|q[xkYtkYtdQt]Mi_OkdSld[lgUolYnfWkdUnfUufSrl`wd|x]zt_tz`wqYug]wfSldSq_Qk`QlgSq`QibWnbQngUki]nf[o]Sk_Qi]OlbQkkUiiSr`SklWrn[qoUnd]iiYoiQndYldQnbSkdYi`UlbSkfUlr_nw_qq]qtgqw_tlUqfUndStdMigYro[nnYqq]wr_qnUqbWn_QkgMq_Qi[OiUFiWMf]Qg_QgYOd]MgYIi]OddQifOifQnlWni]tk_ogSuiStdMofSnfSnfSngSndQogWokWqiQndKl_Ml_Ig]MkYOi`Qk`SgdQf]Ul_Kl`Sk`UibOn_Ml]QkYMi]Oi[Qf`Oi]FiQQ`YQk_IgWMgdQf`Mk`YndUto]xxn¥¡¯«¹§³¾¬¼¿®½Â®ÁÅ¬ÃÃ­ÈÀ¶ÃË³ÉÌ»ÊÎ»ÎÏ¸ÍÌºÏÑ»ÎÐ»ÎÌ¸ÍÌ¹ÎÌ»ÏÏ¾ÎËºÎÎ»ÌÏ¹ÌÌ¹ÍÌ·ÎÍ·ËÌ½ÐÌ¸ÍÏºÐÌ·ÌÌ½ÎÎ»ÌÌ»ÊÌ»ÎÌ»ÎÎ»ÎÌ¸ÌÎ»ÍÏ»ÐÎ·ÌÊ¸ÍÎ»ÌË¸ÍÌ»ÎÌ¶ÌË»ÊÌ»ÎÊ¹ÎÊ¹ÊÌ¸ÌÊ¸ÊË¸ËÊ¸ÌË·ÌÊ»ÌÊ·ÊÊ¹ÎÊ·ÌÉ¸ËË»ÊÊ´ÈÈºËÊ¶ÊÊ»ÉÈ·ËÊ·ÉÈ·ÈÊ·ÊÊ¸ÍÈµÈÈ¸ÉÈµÈÈµÈÉµÌÉ·ÊÊ»ÌÉ¹ÈÈµÇÇ¶ÊÈ¸ËÈ·ÈÈµËÈ·ÊÈ·ÈÆ¸ÉÄµÈÈ·ÈÊ¶ÉÊµÉÄ´ÇÆ´ÇÆ´ÈÈ¸ÆÆµÊÇ³ÈÅ²ÆÈ¸ÇÆµÉÄ³ÈÆµÇÈ¶ÈÅ´ÈÇ³ÅÇµÈÇ±ÈÆ³ÇÆ¶ÇÄ²ÇÆ·ÇÇ³ÉÅ³ÃÈ¸ÉÆ·ÆÆµÉÄ³ÇÆ³ÇÅ·ÈÃ²ÄÃµÃÃ³ÈÃ²ÆÄ³ÈÄ³ÆÃ´ÅÃ°ÃÃ²ÄÁ±ÃÃ³ÂÇ³ÆÅ³ÆÁ³ÇÄ®ÇÂµÃÁ³ÅÂ³ÈÃ°ÃÄ³ÃÃ°ÄÀ­ÅÃ±Æ¾¯ÁÀ¯Á½°¿Â®Ã¾°Ã¿¯ÁÀ±ÄÁ°Â¾­ÀÀ°Á¾®Â¾¬Â¾®Á¾®Á¾®¾À°Á¾®¾À®¿¿°¿½­¾¾¬¾½¯¼½¬¾Á¯Á»¬¼¾¬À¼®¾Á®Á¼¬¿½­½½¬¾½¬Á¾«À¿«¿º¬¾»®¾»«½»®¿¾¬¾»®¾¼ªÀ»¬¾¹©»½¬½»«¿·«»¸­½»«¾ºª½»«¼»§¾»­¼º¬¾º«¿»¨»º©¾½¯¾¹ª¾·¨¼¸«ºº§½·ª»º¬º»«¾·§¸¸¦º¹ª¼º§º¸«º»«¾¹§¸¸©»·§¸¸¦ºµ¨º·©·µ¤¹¸¦·³¤¹¸¦»¸¦¹´§¹³§µ·¤¶µ¦¸´§·µ¢¶´§µµ£·´£·³¥·µ¤¸³¡µ²£·´¢·³¦µ³§¸»¬¿¸­Àºª¿»¬¿¹¬¾·®Á»¬Á»¬Á¾ª¾º°¾º¬½º¬¾»¯Á»©Â¼¬Á»®»À¬Âº®À¹®À¹§¿»¬¿¾«Á¼¬Ã¼¬Á¼¬¾¿«Á»­¿½­À½¬Â»¬Á¾¬À»¬Á½¬Á»­¿¾¬Ã½¯Ã»®Â¾¬Ã»¬Ã½¬Â¼­Ä»¬Á¼¯Æ¾­Á¾¬Ã¼®Á¾¯Á½­Â¿¬Á¾°Â¾­Æ¿¬Â½®ÆÁ°Â¹®À½¯ÅÀ®Â¾±Ä¼®Á¾±Á¾®ÅÁ±Â¾°ÃÁ²ÂÁ®ÄÁ³ÆÁ®Æ¿±ÂÁ±ÆÀ³ÆÁ³ÃÁ³ÊÃ³Å¿³ÄÀµÈÁ²ÆÆ³ÆÃ´ËÃµÈÃµÈÅµÈÅ´ÈÃ³ÆÂ³ÇÃ³ÉÄ³ÈÆ³ÈÁ³ÈÃ·ÈÃµÊÆ³ÇÃ³ÊÃµÈÇ¶ÊÃ³ÊÅ¶ÊÇ¶ÊÇ·ÊÈµÉÆ´ÎÈ³ÇÇ·ÊÆ·ÌÆ´ÊÅ·ËÉ¸ÈÆ·ËÇ¸ÌÈºËÆµÏÉµÊÆ¶ÊÇµÊÇ¹ÌÆ·ÊÈ¹ÊÈ·ÌÈºÌË¶ÌÇ·ÌÊºÍÊ¹ÏÈ·ÊÄ¹ËÊ¶ÎÈ·ÌÇ¹ËÈ·ÍÈ³ÌÇ¸ËÉ·ÌÌ³ÍËºÌÉ¹ÐÈ¹ÎÈºÊÇ»ÐË¼ÎÇ·ÍÊ¸ÐË»ÎÈ¿ÏÊ»ÎÊ·ÌÊ¸ÌÊ¹ÐÊ½ÐÊ»ÒÌ»ÎÌ»ÐÉ¹ÎËºÌÈºÐÍ»ÐËºÎÊ»ÐÌ·ÎÊ»ÐÉ·ÎÌ¹ÏÈ¸ÐÍ¹ÎÍºÍÈ·ÏÈ·ÎÍ½ÒË½ÒÎ»ÎË¾ÒÐºÏÍ½ÐÊ½ÎÍ½ÑÌ½ÐÍ»ÑÏ»ÑÒ¼ÎÍ»ÔÐµÐÌ»ÐÎÀÒÍ¹ÒÎ¹ÐÌºÐÎ¶ÏÏ¾ÓÌºÎË»ÒÎ¹ÑÎ»ÒÌºÐÌ½ÎÎ¾ÐÎ»ÏÊ·ÏË½ÒÎ¼ÒÍ¼ÎÊºÏÌºÒÎ½ÖË¾ÒÌ¼ÐÍºÐÍ¾ÍÌ½ÐÌ»ÑÎ½ÑÌ¼ÓÏ¿ÑÍ»ÎË»ÒÍ¹ÑÌ½ÑÐ»ÓÎ¿ÑÐ»ÒÒ¾ÐÌ¾ÏÐ·ÓÐ¼ÐÒ¼ÕÐ»ÐÐ¾ÒÎ½ÑÑ¿ÓÎ¼ÑÍ»ÕÒ½ÒÑ¾ÕÒ¾ÕÐ¿ÓÒ¾ÒÐ¿ÓÒ½ÒÐ»ÒÓÀÕÒ¾ÕÓ¿ÕÒ½ÓÏÃÖÏÁÓÑ¿ÒÒ¿ÖÐÁÓÒ½ÔÓÀÒÎ¾ÒÎ¾ÓÓÁÕÒ¾ÕÑÁÕÒÂÒÒ¿ÖÎÁÏÓ¿ÔÐ¾ÓÓ¿ÖÑ½ÓÎ¿ÔË¾ÒÐ¼ÕÐ¿ÒÏ»ÐÎÂÐÎ¾ÐÐ»ÌÊ»ÌÉ¹ÈÁµÁ°wwfldo`~n[{nd{q]wkS{d[qdYrgUtg[ri]xk`wndwx`{u`xndzk_wlbztf{ud~xl|ubqgzr`zk`xk`xl_uk_ugYrfWrd[o_YlkUuf[tdStkbrkWxl_nndwo_{lbutfzulzufxogzo`ui]zk_tk[xi]wq_wnbzzg|lbzkfzkfwidukkwtfzwd{ubwqbzg[wi`{o_xrdzxg~|kwxgodxk_zqYxi_ri[xfYqfWrd]ul_qdYl`Wt`Un`[kg[wk`ui`wxbxui{n{kwgnb~n`xlbzo[zn_zrb|ug{b|qgzr`uo`rfUtiYwd[qb[td[odYok`ud]rfWrb[of]wg_rg]tdYrbWob[tfWr`UtW[nd]tbSod[n_[r`Ur`]ql[rlY{ng|t¦¥·©³¾¬·Ãµ¼Ë»ÈË¹ÈÍ·ÌÈµÈÊ¸ÊÎ»ÓÑÀÐÑÀÓÏÁÓÐÁÒÍ¾ÒÏ½ÓÔ¿ÕÎÁÒÏ¿ÒÐÁÎÎ½ÒÒ¾ÓÌ¾ÏÎ¾ÐÎ¼ÒÐÁÎÌ½ÐÐÁÓÑ¾ÐÒÁÔÐÂÒÏ¿ÒÐ¾ÏÑÁÔÎÁÐÐ½ÑÍÁÒÑÀÒÐÁÐÏ½ÒÐ½ÒÌÂÓÍÀÒÏ¾ÐÏ½ÐÎ¾ÐÎ¾ÐÌ¾ÑÐ»ÎÒ¼ÐÐ¾ÎÍ¼ÑÐ½ÑÌ¾ÐÌ½ÐÐ¾ÐÐ¿ÐÌ¼ÐÏ½ÒÊ¹ÌË¾ÏÎ½ÐËºÌÎ½ÒÏÀÐÐ¼ÎË»ÐÍ¼ÎÌ¹ÎÊ»ÐÎ·ÎÌ¼ÊÊ»ÍÎ»ÎÎ»ÐÈ¼ÎÌ½ÎÌ»ÐÊ¾ÌË»ÍÍ¸ÎÎ»ÐÈ»ÍÎ»ÎÊ¸ÎË½ËÊ¹ÎÌ»ÌÌ½ÎÊ»ÎÊ¹ÎÊ¹ÑÈ»ÑÍ»ÐÈ¹ÎÊ»ÐË¹ÐÇ»ËÈ»ÌÊ¹ÏÉºÍÊºÎÌ¹ÎÊ·ÌÉ»ËÈ¸ÌË¹ÌË¾ÊÆ·ÍÈºÈÉ¼ÌÆ¶ÍÉ¹ÌÌ¹ÌÉ»ÍÆ»ÈÉºÊÈºÊÆ·ËÇµÈÈ»ËÉ·ÊÆ»ÊÉºÈÈ·ÊÃ¶ÈÅ½ÈÈ·ÊÆ¸ÉÅ¸ÈÆ·ÈÅ¶ÆÅ·ËÇµÈÃµÈÃµÈÅµÉÄ³ÆÇ·ÈÁµÅÆµÊÁ¸ÇÃ°ÇÁ³ÄÃ²ÇÂ¶ÆÃ¶ÉÂ´ÆÃ¶ÆÁ³Å¿²ÂÀ±ÆÁ²ÂÂ°ÃÂ¶Ã¾³ÃÃ²ÅÀ³ÃÃ³ÃÂ±ÃÂ³ÅÄ´ÆÁ´Ã¾³ÃÂ³ÄÃ³ÆÁ²Ã¾²ÆÁ²ÃÁ´ÃÀ³ÅÀ³ÃÀ³Å¿±ÃÀ³Á¾®Ã¿³Ä½²Ã¾°Â½³ÄÀ¯À½±Á¾±Á¿¯Ã¾¯Â¾³Ã¾®ÃÀ°Ã¿³ÃÀ°Ã»¯¿½°ÀÁ³Â¾¯À¿±Á¾²¿¿®À¼¯À»¯¾½¬À»¯¾½®¿¾¬¾¹¯¾¼¯¿¾­Á¾¯¾º®Á»¯Á¼­¿»±À»­À»®¼»¬¼¼«¿»­½»¬¿¸¬½»«¿·®¾»ªÀ¸­¼·©¸¶¨»·«½¸©½¸©¾¶¦¹³¬¼·«À¹¨½¸ª¹·«¾¹¬½¸ª»¯¢³µ«º·¥¸º¦º¸©½·§»·«¼»§¸¸§»·¨º·¦»º¦»³¥»¸¨»·¡¾µ¦º·¤¾º§»³¦»¹©¾»£»¶§¸·§¹»«½º£º¶£¸¶§ºº¦»¹©½º§¾¹§½·§¾»ª½¸§¾»©½¸«¾¹¥¿»©¿¸ª½»¥¾¹§»º¬¼¾¥»¸©»¸¦½·§¼·¨½»«Á¾¨¾»§º»§½»«¾¸¨½»§¿¸©Â½¦¾ºªÀ·¦½¼¨»»ªÁ¼¨À¾©Áº§¾½«Á»ªÂ¼«»¿°Â¾¬Ã¾¬À½¬Á¿©ÀÀ®Á¾²Á¾¬ÄÀ¬Á¾¯ÄÁ°ÅÀ®ÃÂ®ÆÁ¬ÄÀ¬Å¿¬ÃÁ¯ÈÃ¬Ä¾¯ÄÁ²Ä¿¯ÃÁ°ÆÂ®ÃÄ²ÅÁ®Å¾±ÃÃ±ÇÁ²Ã¾²ÄÆ°ÇÂ®ÄÃ®ÅÁ²ÆÁ³ÆÃ³ÇÃ°ÅÃ²ÇÅµÅÁ±ÉÃ²ÃÃ²ÃÄ³ÇÄ²ÇÃ±ÃÁ®ÆÆ±ÆÃ²ÆÆ´ÉÄ³ÊÃ²ÇÄ°ÃÄ³ÆÃ³ÄÆ³ÈÆ³ËÄ³ÉÄ³ÇÄ²ÌÃ³ÉÅµÊÇ±ÈÅ³ËÅµÈÈ°ÊÅ±ÊÈµÈÆ³ÊÊµÉÇ²ËÇ·ÌÇ³ÈÈ²ÈÄ³ÊÈ´ÉÈµÊÆ´ÈÅ³ÊÇ²ÈÆ·ÊÆ·ÊÆµÇÊ¸ËÅµÌÄ´ËÆ¶ÊÈ·ÊÈ³ÊÄ¶ÌÅ¶ÊÆµÊÇ³ÉÈµÌÈµÇÈ·ËÉ¶ËÈ³ÌÆ·ÉÊµÊÉ³ÉÆ´ÈÈ·ÊÊ·ÌÈ¶ËÅ¹ÈÇ¶ÉËµÌÉ¸ÈÌ´ÎÉµÌÉ¸ÎÊ·ÊË¸ÌÊ·ÎÉ·ÊÈµÊÊ¸ËË·ÌÉ³ÈÈºÊÊ·ÌÊ¶ÍÇ·ËÌ¹ÌË¸ÊÉ´ËË·ÊÉ¶ÉÈ·ÌÈ·ÊÇµÍÈ³ÍËºËÊ·ËÉ¶ÍÌ·ÌÉµÎÊ¸ÊÊ¹ÎÊ¶ËÊ·ÉÆµÆË´ËÉ¹ÏÌ·ËÈ¹ÍÈ¸ÎÊ´ÊÇ·ÍÇ¹ÌË¶ÍËºÎÎ·ÎÌ¹ÐÌ»ÏË¸ÌÌ·ÌÎ½ÒÉ·ÌË¸ÌÌ»ÌÌ·ÐÍ·ÎË·ÎÌ¼ÎÎ¸ÒÌ»ÎÎ¼ÐÎ·ÎÌ¸ÎÎ»ÒÍ¼ÐÎ¹ÐÌ»ÐÑ¸ÐÊ»ÎÊ»ÌÌ¸ÎÎ¹ÏÎ½ÎÎ·ÏÌºÎÎ»ÏÍ»ÒÎ»ÌÊ¹ÐÎ»ÎÎ¹ÐÎ»ÐÍºÏÎ¸ÑÎÀÒÎ·ÎÌºÐÈ½ÍÏ·ÍË´ÌÈµËÎ¸ÌÊµÍÆ·ÆÄ³ÅÇ³ÄÈ±ÁÂ¯»´ ²~xirY~q`zo[zqYqkQuiUofSrfQqbQk`QndSl]Mk`Qn`Skgbnw`tq]rgYogSq`SolUqn_tz]zqYtqUri]tnUqiYqkSodMk`Wl`Ok_Mk[Sl]Sk`Mk`SlgSniQkdUngUlgWtnbl~]qoYui[qbYngOngQi`SkiYqqWnlbroYtgWqd[ibOk`MibQkgWno]tk`on[rbQo`SldQnd[nk[lndtq`uk]no]tlUnkWqgUqgWqbOo`QgfUnkQqYOgYQb[Fg_OdfMkdQld[nn]q{oxq{qb|rYwg]ugQugUrg[riWtl]rl`tgfqg[oiWqdQq_Qo]SibQn_QigSkgSqdOofQl`Qo`Un`Qn`Qg`Qn_Sg`Ug_Qk[Qg]Qf_Uk`OkYO`_MgYQg`Og`Qo`Sqn_qwi|­«¶§±¿²½Æ·ÃÊ¸ÈÌ¹ÈÇµÉÉ³ÊÏ½ÌÎ¾ÎÌ»ÎÎºÍÑ¾ÎÐ½ÍË·ËÌ·ÎÐ¼ÓÊ¹ËÌ¸ÌÎ¸ÏË¸ÌË»ÊÊ¹ÌÉ·ËÏ¾ÊÏ½ÐÍºÎË¹ÎÌ½ÎÎ»ÍÌ·ÌË»ÎÒ½ÐÊ¼ÌË¼ÌÌ¸ÎÊ»ÎÌ½ÐÎ»ÌÍ¸ÌÍ·ÌË·ÍÈ·ËÉ¸ÍÌ»ÌÍ»ÍÌ¹ÌÇµÈÈºÊÊ·ÌÌ·ÊË¸ÊÎ¸ÎÎ½ÌÉµÌÊ·ÊÊ·ËÊ·ËÆºÌÆ·ÊÊ·ÊÌ·ÌË¹ÊÆ·ÌÊ·ÉÊ¸ÆÈ¶ÊË·ÊÇ·ÊÊ¹ÊÊºÇÈ·ËÈ·ÌÈµÇÅ¸ÈÈ·ÇÊ·ÈÆ´ÈÈ¶ÈÇ¹ËÆ·ÈÄ·ÇÈ´ÊÆ³ÇÇ·ÍÈ¶ÊÆ´ÇÅ¸ÉÌ·ÉÅ¶ÈÇ´ÈÈ¶ËÆ¶ÈÇ¶ÇÈ³ÇÄµÅÆ·ÈÅ¶ÈÄµÇÅµÆÅ·ÊÆ³ÇÆ³ÉÇ¶ÉÆ³ÆÄµÅÃ²ÆÁ³ÇÅ´ÄÇ³ÇÇµÇÄ²ÄÆ¶ÆÇµÇÄ³ÆÃ³ÃÂ³ÄÇ²ÄÆ´ÅÄ³ÆÄ´ÄÃ·ÆÂµÆÃ²ÂÅ²ÄÃ³ÆÃ±ÆÃ°ÈÂ´ÄÂ°ÃÀ°ÄÅ²ÃÃ²ÃÂ±ÃÃ±Ä¾®ÅÃ­ÁÀ²ÀÂ°Á¿­ÂÁ¯Ä¾®ÃÁ­Â¿®ÁÁ±Á¾°Á½±Ä¾²ÀÁ®Á¾¬¾¾°ÂÀ¯ÁÀ­¾¿«½À­Á¾°Á¾®¾¿­Â¾±»À¯¿¾¯¾¾°¾½­Á¿®¾»¬¾¾­À½«À»¬½»­½¾¬Á¾«½¼°»»ªÀ¾«½»­À¾¬Á¾®¾º¬¾¼­¾¼®»»«¾»®¼»«»º«»»®¾»«½½¬Á¸¯¼¾­¿»¬¾»¬¾»¬¾¼¬À»­¼»«½¸«¾¼©»¸¬¾º¤¼¸«¼¼¬¾¹ª»»¨»·«º»¬¼·ª¹·ª»»¨»³©¸·ª¸¶«»¸ª·¶«»µ§¸¸§··¨º·©º¶«¸³§·³§·µ¢¸²¦´µ¦º³¥»¶§¹³¤·³¤º³¢·³¦¸´¤´´£·³¤¶µ¤µ³ªº»®¾º¨¼¾­¾¾¬Àº¬À½­¿¾ª¿»­Á¾¯¿¿©Ã»ªÀ¾­Á¿¯¿½¬Á»¬»À­¾¾«¿¿®À¾¯¿¾¬Á¾¨Á»ªÀÀª¾¾¬Á¾®Â¼¬¾¼ªÂ½¯¾¿¬Ã¼¬Ã»¬Á¿¬Á½¯Á¿­Á¼¬Â¾¬Å¾­Á¿¬Ã¿¬Á¾¬ÂÁ¯ÄÀ®ÃÀªÀÀ®Ã¾¯Â½³ÂÁ®ÆÁ«ÂÁ¯ÁÁ¯Ã¾±ÅÁ¯ÃÁ²ÃÁ­Æ¾¬Â¿®ÃÁ°ÂÀ°ÃÀ¯ÃÀ±ÆÀ¯ÄÁ¯Ã¾­ÂÂ®ÃÁ°ÅÅ³ÅÁ°Å¾±ÄÀ³ÆÁ°Æ¿¯ÅÄ³ÈÃ°ÆÆ³ÈÅ³ÅÆ´ÈÁ³ÆÄ³ËÃ´ÉÅ¶ÉÆ¶ÈÆµÊÅ´ÊÅ¸ÈÃµÉÆ°ÊÆ¶ÊÃ¶ÆËµÌÅ¹ÈÆ¶ÊÈµËÃ·ËÈºÉÄ±ÊÆ³ÈÉ»ÉÇ·ÌÇ¸ÊÅ·ÎÊ³ÌÈµÌÈµÊÉµËÇ·ÊÊºÊÈ·ÊÈµÊÈ¹ÊÈ¹ÊÈµÌÈ»ÊÊ»ÌÊ·ÌÉ»ÌÉ·ÊÊµÎÇºÌËµÎÊºÎÈ¹ÎÌºÌÈµÌÇ¹ÏÊ¸ÏÊ¸ÌÈ¸ÏÈ»ÌÊ·ÎÌ¸ÐÈ»ÍÊ¸ÎÊ·ÍÍ¸ÌÌºÐÌºÎÉ»ËÊ¹ÐÍ·ÌÊ»ÈÌ»ÌÊ¸ÏÌ¼ÐÊ¸ÍÊ¹ÒÊ¸ÐÊ»ÑÊºÒÐ¹ÎÌ¼ÎÊ¸ÎË¸ÎÐ¼ÎÊºÏÍ¸ÍÊºÐÍ¾ÒÎ»ÐÉ¼ÍÊ½ÏÎ½ÍËºÍÌ¹ÏÌ»ÐË¼ÎÎ·ÏÍ¸ÎÏ¸ÎÎ»ÒÎ¼ÐÍ»ÏËºÓÒºÒÎ»ÒÍ¾ÒÍ¼ÐÐ¼ÒÎ¿ÑÌ»ÓÏ»ÐË¾ÐÐ¿ÒÐ¼ÒÎ¹ÒÐ½ÒÎ¿ÐÌ½ÐÐºÎÌÀÓÎ¼ÏÒ¼ÐÌ»ÐÌ¼ÏÎ¾ÒÊ»ÒÊ¼ÐÍºÐÎ¾ÒÍ»ÐÍ»ÒÏÀÒÎ¼ÒÎ¹ÒÐ¼ÒÐ¸ÏÎ¿ÎÍ¹ÏÎ¼ÕÐÀÐÏ½ÕÏ»ÐÎ»ÐÐ½ÒÎ½ÒÍÁÐÐ¾ÐÐ¼ÕÑ½ÓÐ¿ÕÐ½ÔÐ½ÐÏÀÔÎ¼ÒÐ¾ÒÐ¾ÒÐ¿ÓÓ¾ÕÐÀÓÎ½ÕÓÀÕÑ¾ÔÑÁÕÖ¾ÒÏÀÓÓÀÔÐ¿ÓÒ¼ÕÒÃ×ÕÂÓÏ¾ÖÑ¿ÓÒ½ÐÑÁÒÐÀÕÑ¿ÕÑÁÓÒÁÖÑÂÓÓ¿ÓÒ¾ÕÐ¾ÐÔÁÕÓÀÓÓ¾ÓÒ¾ÒÓÁÑÒ¾ÓÕ¾ÔÒ¾ÒÒ¾ÓÏ»ÒÐºÑÎ¼ÏÍ¹ÌÎ»ÊÈ·ÈÅ±Â¿­¼³¦²§©{qwgriui|wi|qdndzl`un_wq[xl]wi[riYql_{qYwnbxqbzn_wqdur`wkbun]xu_zwizg|zfzwg{ob|tbwn]xi[wk]rb[qi]kk]tf]nk[oiYrn]qn`rnbzqbxi]tlntkxxdtbql`{l[xo]rgb{r_rqdznbtq`uob{g]qo_riYrkbql_ur]{q`tr_xnUtkWrfYun_wkbuo]~t_|rbunbwl`{l]{q_{o_to[wk_tiYr`[u`Yrb]tfUod[igWugYtn]ul`{tb|q{tuk~d|z`td{qf{q_o]~r`{ub{qb{obxq[zl[wi[ui_wi`uofwkdxn]xi]wobuk[rk`ul[qn]x`[rg[ufYqb[niYog[rd[t`[kb]ti[of[ni]tf_wk_wn`|ri~¡¬°¾®ºÆ¶ÁÊ¼ÉÌ¼ÌÓ¾ÏÑ¼ÓÓÁÑÓÀÔÓ¾ÓÔ¿ÐÐÁÓÐÁÒÐ¿ÔÓÁÐÒÀÕÎÀÒÎ¾ÐÎ¼ÎÎ½ÐÐ¾ÐÐ¾ÐÓ½ÓÏÀÏÏÁÐÒÀÒÓÂÒÒ¿ÒÑ½ÑÐÁÕÓÃÔÓ¿ÒÌ¾ÓÑÁÏÓÀÒÍÀÒÑÀÒÐ½ÓÐ¿ÐÎ¾ÐÎ¼ÐÐ¾ÓÌ½ÓÐ»ÍÏ¼ÒÎ¼ÐÐ¼ÐÐ¹ÎÍ¾ÎÎ½ÒÑ¾ÎÎ¼ÑÎ»ÒÐ¾ÎÏÁÐÎ¼ÐÐ½ÎÌ½ÐÐ»ÐÐ¼ÒÌ¾ÌÐ½ÐÒÀÒË¾ÏÌ¾ÎÎ»ÐÏ»ÍÌ»ÐÐ½ÎÊ¼ÎÍ¾ÎÌ¼ÎÌ½ÌÐ¾ÎÎ»ÍÊ¾ÑÍ»ÌÐ»ÐÎ½ÍÈ¼ÍË¹ÏÍ¹ÍÊºÑË¼ÎË½ÍÌ¾ÎÊºÌË»ÏÏ¾ÎÍ½ÎÍ½ÍÌ»ÌÌ¹ÌÍ»ÎÎ»ÍÌ»ÐË»ÍË¾ÎÌ»ÍÊºÎÉ¹ÊÌ»ËË»ÌÉ¶ÊÇºÊÊ¶ËË¸ÌÈ¸ÆÊ¹ËÊ·ËÈ¸ÌÊ¹ÍÈ·ÊÊ¹ÌÇ»ÊÈ³ËÈ¸ÊÈ¹ÊÈ·ËÈ·ÈÆ¸ÌÇ·ÌÆ¶ÊÈ·ËÅ·ÈÈ¹ËÃ¸ËÈ·ÊÆ¶ÈÈ³ÇÆ¸ÆÇ¹ÇÆ·ÈÆ¶ËÇ´ÆÈ·ÈÆ·ÇÅµÈÄ²ÇÅ¶ÈÄ´ÇÅ¶ÆÆ·ÊÂ¶ÂÁµÊÂ±ËÄ·ÇÃ³ÄÂ³ÁÃµÇÅ³ÆÃ³ÀÁ³ÃÁ³ÈÁ¸ÆÃ³Ã¿³ÅÃ³ÁÈ³ÃÂ²ÅÄ²ÂÂ´ÂÄ°ÆÂ³ÂÁ²ÃÃ°ÂÁ³ÇÂ²Ä¿²ÄÁµÂÁ³Á¾°ÂÁ²ÁÁ²ÄÀ´ÄÀ®Â¿´ÃÁ¶ÂÁ¯Ä¿±ÁÀ¯À¿¯Á¿¯ÂÁ±ÄÀ³ÃÂ¯ÅÀ³ÄÁ³Á¿¯ÅÁ³ÃÃ°ÃÀ¯Ã¾¯Ã¿¯Â¾³Á¿¯¿Á°Á¾­¿¿®Ã¼°¿½¬¿¼±¾¾®Â¾®¾¼³¿¼¯Â½±¾¸¬¿»¬½½­½½­¾¼¬¾»¬¿º¬¾»«¿º­Áº­¾»¬¿½¬½·¨¼¶®¿»§¾¸«¼¹­¾¹¨¼»¨¼·ª¼º¬º·¦»µ©»·¬¶¹©¹°¤°¶¥··¢»¸¨ºµ§º·§»¹¤º¹¥º¹¬»·£¼³¨º¹¦º¸§»¸¦º»§½º¦¾·§»¸£¹¸§»¸¥¹º§¾º¥»¸¨º·ª¼»¨¼µ§¾¸ª¾º¬¾¹¨»¸¦½¸©¼»¨¿·«¾¹ª¿¸¦½»§½»ª¾»§Â¹¥¾»ªÀ¹§¾º©½º©½¸§À·«¾»ª¾º§»½ª½»«Â½§»¸¨½º¨¾»«¾¼©½¸«À¾©½¾¬Á»©¾¼¨Ã½«Áº¬¾¾¬Á½«À½ª¼»¬Áº«À·§¾¾ª¾¼ª¿¾¬À¾®Á¾¬Á¾¬Á¾°ÃÁ±Á¿±ÃÁ®Ã¾­ÂÁ¬ÁÀ­ÃÁ­ÃÃ«ÃÃ¯ÄÂ¯ÈÂ±ÆÁ°ÃÂ°ÆÁ¬ÅÁ°ÈÂ²ÇÂ¯Ä¿®ÃÄ¯ÇÃ°ÆÀ¯ÄÃ³ËÂ°ÂÂ±ÇÂ±ÃÁ°ÈÁ±ÁÃ®ÄÄ°ÆÁ³ÄÃ²ÇÄ³ÆÆ²ÊÃ±ÃÄ²ÉÃ´ÄÇ°ÈÆ³ÉÄ±ÇÅ°ÅÅµÉÇ±ÇÃµÇÃ²ÊÅ°ÇÆ¶ÇÆµÈÄ±ÈÈ±ÈÄ³ÆÉ³ÉÃ´ÈÇ³ÊÆ°ÇÃµÄÇµÉÃ·ÊÈ·ÆÇµÇÆ²ÉÈ³ÇÈ¶ÈÅ³ÊÆ³ÊÅ·ÊÈ·ÌÇ³ÈÇ³ÊÅµÊÊ¶ÈÄµÉÆ´ÉÇ²ÈÇ´ÆË·ÊÆ´ÍÇ³ÇÈ»ËÆ³ÈÇµÊÊ´ÊÊ´ÍÈ¸ÌÉ·ÊÊ¶ÌÈµÌÈ·ÈÈ³ÈÈ´ÌÊ·ÈÈ¸ËÈ¶ÌÆ·ÊÉ´ÌÇ´ÎÅ³ÌÈ¶ÌÊ·ÌÈ¶ÌÊ¶ÌÊ·ÎÈ³ÌÅ¸ÇÊ¸ÎÊ·ÊÌ·ÌË·ÍÊ·ÌÊºÌË»ÌÈµÌÊ·ÊÊ·ÎÌ¶ÌË¹ÈÈ·ËÍ³ÍÉ»ÊÉ·ÉÊ´ÌÊ·ÊÊ·ÌÈºËÇ·ÈÊ·ÎÊ·ÌÊ·ÊÌ¸ÌË¹ÌÌ¸ÌÊ¹ÌÉ·ÌÉ¹ÊÌ·ËÌ·ÎÊ¸ÌÈºÍË·ÏÊ·ÍÉ»ÊÊ¹ÌÌºÍË¸ÎÊºÌÊ·ËÈºÎÍ»ÎÍ¸ÐÌºÌÊ¸ÌË»ËË¹ÏË·ÉÎ¸ÐÊ¹ÏÊ¸ÌÌºÎÌºÌÏ¸ÎÍ¸ÎÌºÏËºÍÎ·ÑË¸ÏÉ¹ÎÌ½ÒÌºÎÊ¸ÌÌºÎÎºÏÎ»ÒÍ¹ÏÌ·ÏÌ¸ÍÏ»ÎÌºÏÌ»ÎÏ½ÐÎ»ÎÌ¼ÏÎ¸ÐÑ»ÏÏ¹ÌÎ¹ÌÌºÎÎºÐË¼ÌÏ¸ÎÌ¸ÍÊ·ËÉ¶ËÆ´Ã¼«¼° µ¡£q{kw`n]xnUzg]xoYulWurWrgYtkOrk[nkSonUqiYok[qk_t`WlYUndOl_Qn]UlkUntUqfWiiYqnWtq]qq]nnYtlYogUobKk]QlYMgYOkdIigSg_MldQi`UkfYniUn`Sk`KndUnk[klYqkWnbUndSndQlfSngSngOnbQifUkgQlfSk`Wk`SkdQlgYkfSn`Qg`SndUnfSl`SkgSlfKn`UidUndQwgUndUkgQngUo`UqiYoiQo`Ul_InQOfUKg_Kf_OkdQkgOkgSnfQogStf[qo_z{]{w`xwd{x]|`|_{r[{k]zfYwlYtiYrlWro]rlQwdSndYogUri[riSrgOo`SodWqlWtnUqgYnfYrgUnbUn]SqbQl[Sg_Ug[MfbOkYQkYMd]Og_Qi`Qk_WndSnfQtgWzq¢¼©³Á°»È´ÅÌ·ÇÈ»ËÎ»ÉÎ»ÌÏ»ÌÎ½ËÎ¾ÍÏ»ÍË¾ÐÌ¼ÎÎ»ËÍºÐÎ¸ÏË·ËÌ·ÌÌ¸ÏË»ËÊ»ÎË¸ÌÏ¸ÌÌ»ÎÏ¼ÌÐ¼ÎÌ¼ÍÏ¹ÎÌºÌÌ»ÌÌ¸ÎÊ·ÌÍ¹ÍÎ¹ÌÎ»ÏËºÊË»ÍÊ·ÊÌ¼ÉÌ¸ÏÌ¸ÍÊ¹ÊÌ»ÊÎ·ÊÌ»ÊÊ»ÈË»ÌË¹ÌË·ËÊ¹ÐÎ·ÌÊºÊÉ·ÉÊ¶ÌÉ·ÈÊ¸ÌÇ·ÊÈºËÌ»ÏÈ¸ÈË¸ÈÊ·ÉÌºÊÊ·ÊÈ¹ÌË·ËÊ·ÊÊ·ÉÊ¹ÌÇ·ÊÈ¹ÊÉ»ËÈµÊÄ·ÉËºÌË¶ÉÈµÊÈµÊÈ¸ÉÆ¸ÇÈ¸ËÇ´ÇÆ·ÊÆ³ÇÄ³ÌÄµÇÈ¶ÊÈ·ÊÉ¹ÈÈ¶ÊÊ³ÌÄµÇÆµÈÈµÊÇ¹ÉÈ·ÈÈ·ÈÅ³ÈÅ¶ÈÇµÇÇ²ËÃµÆÈ·ÈÅµÅÆ´ÆÆ±ÅÄ³ÆÃ±ÄÅ²ÆÆ²ÆÃ³ÆÅ²ÅÄ²ÆÁ³ÅÆ³ÅÂµÆÃ²ÄÄ³ÂÆ³ÉÂµÇÃ³ÆÁ±ÆÄ²ÃÂ²ÆÁ´ÄÂ±¿Ã´ÃÃ³ÆÁ°ÅÁ®ÃÁ³ÈÁ°Å¾¯ÃÄ²ÂÂ¯ÃÅ±ÂÀ²ÆÃ°ÃÁ²ÄÁ®Å¾­ÄÀ±ÂÂ¯ÁÀ²ÃÁ±À¼¬ÃÀ¯ÀÀ°Á½°Á½­¾½®À¾±Æ½­¿¾¬À¾¯¾À²Å¾®¾½­¾¾±¾À­ÂÀ¯Á¿¬¾¾®»¾­¼¾³¾½®Á»­¿¾¯¾¾©Á»®¹½¯¾½§¿»­»»¬¾»®¾»¬¾¾¬À¹«½¼¬Áº®¾»¬½»©½½©Ãº®¾»«½»¯½º®¾»¬Á½¯¾¸ª»¾­¾¼¬¼»­¾¸§»»¬¼¹¬»¹©º·«¸¸«½¸§¸¸ªº»¬»»­»½¨»¶ª»·ª»¹«¸¸§¸·¨¼¸©·²®º·«··©ºµªº¶¬»·¦¹µ¦¹·©·¶§º·¦¹´¨··¦¸·¦¸±¦¸µ£¸´¢¶´¤··¥··£¶²ª·¶¤¹µ§µ»¬¼¾¦Áºª¿½¬Á¿¬Ã¾¬Ã»¨½º¬»¼¬Ã»¯¿¾«½»«Áº¯ÁÂ®¿¾¬Á½­¾¼¬Â½¬Ã¼¬Á¼¬ÂÀ®À¼«Â¿°Á¿¬Ã¾®Á¼®¿¿®Á¿¬Á¾­¿¾®Ã¾¯Àº¬¿Á¬Ã»¬Å½¯¾À°Ã¿¬Àº¬Ä¾¬ÃÁ¬Á»°ÁÀ­Æ¼¬Ä¼¬ÁÁ°ÂÀ²ÃÁ®Ã¾¬ÃÂ­ÁÀ­Â¼®ÂÁ®ÀÁ­Å¿³ÃÁ¯Ã¾²Ã¾±ÅÂ±Ç¾®Å»¯ÃÁ³ÃÁ¯Ã¾±ÂÃ±ÅÁ¬ÅÃ°ÅÃ¯ÆÂ¯ÄÂ²ÃÁ³ÆÅ¯ÉÃ°ÇÂ°ËÆ³ÅÂ³ÈÆ±ÈÆµÉÃ´ÇÇ°ÈÆ±ÉÆµÆÆ³ÊÅ¸ÊÅ²ÉÊ·ÈÇ´ÈÆ¯ÈÄµÈÅ³ÌÇµÊÄµÊÆµÇÉµÉÆ³ÉÇ·ÌÇ³ÈÅ·ÈÈ¶ÊÆ³ÊÃ¸ÈÈ¶ÊÈ¶ÌÆ·ÌÊµÊÉ´ÌÈ¸ÊÆ·ËÈ¶ÌÈ·ÊÈ´ÍÌ¹ÍÉ·ÏÌ¹ËÊ·ÌÊ·ÌÇ·ËÌ¶ÎÊ¶ÎÊ¹ÍÇ¹ÍÌ·ÎÈ»ËÉ·ÍÌºÎÊ¼ÐË¹ÍÊ¶ÐË»ÊËºÐÊ·ÌÊºÏË»ÊÍ¸ÍÌºÏÎ·ÍÊ¸ÌÍ¹ÐÊ»ÐÌ¹ÐÊ¹ÍÍºÐÊ»ÐË¹ÏÌ¸ÍÌ·ÎÎºÎÉ¹ËË»ÌÎ»ÎÌ¸ÏÌ¹ÐÍ»ÏÍ»ÍÐ¹ÑÍ¼ÐÊ¶ÎÎ»ÏÐ»ÒË·ÎË¿ÐÍ»ÎÌ½ÐÎ¹ÍÌ¸ÏÍ»ÐËºÐÍºÏÊ¹ÌÊ¹ÓË·ÒÌ»ÍË»ÐÍ»ÓÌ»ÐÍ»ÒÎ¾ÑÐºÔÏ»ÑÎ»ÒÑ»ÑÎ¼ÒÒ¿ÓÑ¼ÑËºÎÒ¾ÒÐ»ÓÎ¼ÎÌ½ÎÍ¼ÌÒ»ÑÐ¾ÐÏ½ÐÌ¾ÐÍ½ÔÐ¾ÏÎºÏÎ¾ÒÒ½ÐÎ»ÐÍ»ÐÏÁÕÏ¾ÔÎ¹ÐÏ¼ÒÐ¾ÓÎ½ÒÎ»ÎÎ½ÓÐ¾ÐÌ½ÎÐ»ÐÌºÑÐ¿ÒÒ»ÕÐ¼ÕÐ¾ÑÐ¿ÓÏ»ÑÏ»ÑÐ¾ÒÒ¾ÓÓ¾ÕÐ¾ÓÐ»ÓÐ¿ÓÐ¾ÕÐ¼ÑÒÀÒÐÁÒÑ¼ÔÐ¼ÑÐ¾ÕÒ¾ÖÕÀÒÑÂÒÓ¼ÓÓ¾ÒÑ¼ÒÏ¾ÔÏ¾ÒÑ¿ÒÒÀÕÑ¿ÓÒÁÔÓÀÖÒ¾ÒÑ¿ÕÏ¾ÒÒÁÖÒÀÕÓÂÖÐÁÒÒ¿ÓÓ¿ÕÒÀÓÑ¼ÔÕÁÒÑ½ÓÒÀÕÓ¿ÓÕ¿ÒÓ½ÑÌ»ÊÆ·ÅÀ±À·¦·©|qizirkxbrbrb{td{qb{qgzq`{o_xw`zo_{nb|qf{rgzxbww]xldtoWtb[ufWuk_uq`ru_wn]uk[wo`zxbx|f{zbxw`zr[xi[xfYndUtdSqi]nkUufWugYto]ro]tk]ri]tr_ul]un[wn]tk_olbun[wlbun_zn[xi]rk_tl[zq[rq`rq]ut_unbtl]xl]og[rl]rlYun]un_xqW|i_ur[zl]{n_wt_xt]{o]{l]~t_zo`xx`wnYz_WubYobSndSog[tk[tt]tq_uo[xq]{l`{tdxg~knoxqiudr]t`r_|{du[nbzx`zwb{u_z{g~z`w[{nbxz`ufwxdzw`udubxt[|lYr`Yqi]ufYqg[of]rbUngYod[oi[qi]qg[wl]ul_uzu¸¬±ÈµÂÌ¹ÆÊºÈÐ¾ÏÏ½ÐÒ¾ÎÑÀÒÒ¾ÒÒÁÖÕÁÓÐÀÑÒÀÓÒÁÓÔÁÐÐ¾ÔÐ¾ÐÑÀÔÒºÑÎ¿ÎÒ¾ÔÒ½ÒÐ¾ÐÐ¿ÓÒÃÓÕ¾ÐÒÁÓÕÁÐÒÁÒÒÁÓÑ¾ÒÐ½ÏÒ¿ÒÏ¿ÒÒ¾ÒÐÀÒÓ¿ÑÒÀÓÏÀÏÎ¾ÐÒÀÎÐ½ÐÎ¼ÐÎºÐÑ½ÒÒÁÒÒ¿ÒÏ¼ÌÎ¼ÐÏ¾ÒÐºÏÎÀÍÌ¾ËÎ¼ÑÌ¼ÎÍ»ÑÌ»ÏÎ½ÐÐ»ÏÍ¹ÐÍ¿ÒÒ»ÒÍ½ÏÎ¼ÒÍ¹ÒÏ¼ÑÌ»ÏÎ½ÌÐ»ÐËºÊÌ»ÎÌ½ÌÎ¾ÏÍºÎÍ¾ÐÌ¸ÎÍÁÐÌºÐÌ¸ËÊºÌÌ»ÐË¸ÏÊ»ÍÌ¸ÍÊ»ÌË¸ÎÎºÊÊ¼ÌÊ½ÌÎ½ÐÎ»ÏÈ»ÍÉ»ÎË·ÍÌ¼ÍÌ¹ÌË¼ÎÌ¹ÌÈ·ÊÐ»ÌÌ»ÍÊ·ÊÊºËÉ¸ËÈ·ÊÊ¸ÌÌ·ÇÉ¹ÊË¿ÍÈ»ÌÈºÊÊ¹ÌÊ¸ÌÈ¹ÊÆµÌÊºÊÆ¶ÇÊ·ÈÊ·ÊÈ¹ÊÈ¶ÉÆ·ÎÅºËÇ¶ÉË¶ÊÇ·ÉÈ¹ÈÅ³ÊÆ¶ÉÅµÆÆ¸ÇÅ´ÆÈµÊÇ·ÈÆ¹ÆÆ´ÆÆ³ËÆµÉÃµÈÅ¶ÇÆµÇÅ¶ÅÅ³ÈÅ¶ÈÅ³ÆÃ²ÊÅ°ÉÂ³ÃÃ³ÆÃ²ÃÃ³ÃÃ·ÆÃ³ÅÅ³ÆÂ´ÂÄ³ÇÄ³ÅÁµÆÁ³ÅÁ³ÅÃ³ÁÃ²Ã½¯ÂÄ²ÂÂ¸ÃÁ¯ÄÁ³ÂÂ³ÁÀ²ÈÂ³ÂÁ´ÃÀ±ÄÁ±ÂÁµÆÂ´Ã¾¯ÄÁ±Â½²Ã¾¯Á¾³Â¾³ÃÀ±ÂÁ®ÅÁ±ÁÃ¯ÄÁ¶Ã¾°ÁÁ¯Á¾³¿¾´ÃÁ°ÃÁ®¿¾³Á¿­¿¾²Àº²ÁÁ®Â¾¯Á¾®¿¼­À¼¬¿»±Á¿­¾»¯¿»¬¿¼®Ãº®¿»¯À¾¬¿º¬½¹¯Á»­¾¾«¼º­¼»¬»¼¬¿¹¬»¹­»·ª¾»©¾»¬¼¹¬¾»¬¹º¨»»¬¸¹¬½¹«·»«¹ºª½·¬¸·§½°¨³·¥¸·¥»¸§»¹ªº¸¨¼º§»·§¼º©»·¤¹¸¨¹»¨º»¦¹¸§¼º¨»½©º¹§»¹§»¸£¾¼©º¹©½·¨ºµ¦¸»¬¾»¨¼º¦¼·«»¸¥¾º§»¶£½»§¹¸¥¾¸©¹µ©»¼§¿½«»»«¿½§½¸¤¾¶­½¼¦½¼ª½»ª¿»¨À»©À»§¾º©¾»§À½«¿¼«¾»¨Àº«Áºª¾º«Á¾«¾¼«¾½¬Á»¬½»ª¼½ªÁ¾¬¿¼©À¼ª¿»­Â½«¿¾­Â¾¬À¾«ÁÁ«Ã½«ÁÀ«Á¾®ÄÁ¬Ã¼°ÃÂ¬Å¾¯ÄÁ°ÃÃ¬Ã¾®ÅÁ®Ã¿®ÄÃ±ÃÁ°Ã¿²ÃÄ¯ÁÃ­ÃÀ¯ÆÆ­Â¿¯ÂÂ­ÆÁ®ÃÁ¯ÅÂ±ÈÄ­ÆÀ±ÇÆ´ÃÄ°ÈÅ°ÆÁ´ÅÆ°ÇÃ°ÇÁ²ÆÁ±ÃÃ°ÆÃ¯ÆÂ²ÆÃ²ÄÄ¯ÃÃ³ÅÄ±ÉÆ³ÆÄ³ÉÆ´ÇÂ°ÆÅ³ÇÃ³ÊÅ³ÈÄ±ÈÆ²ËÊµÊÅµÉÇµÇÅ³ÇÆ¶ÆÇ³ËÃ´ÇÅµÇÈ·ËÆ²ÆÇµÆÆ³ÊÇ³ÊÇ¸ÈÅ³ÌÆ³ÈÆ·ÉÅµÊÆ·ÊÇ·ÈÈ·ÊÇ·ÊÇ²ÆÆ¸ÍËµÊÇ³ÇÆ¶ÆÆ´ÉË²ÊÈ¶ÉÈ¶ÉÇµÈÊµÌÊ¶ÊÉµÉÇµÊÈ¸ËÊ·ÌÉ³ËÉ·ËË·ÌÈ¸ÌÈµÈÊ³ÎÉ¶ÉÈ¸ËÇ´ËÆ·ÈÈ¸ÌÈµËÈ¶ËÄµÉÈ·ÊË´ËÈ¸ËÉ³ÌË¸ËÉ»ÉÈµÌÊ¸ÊÌ·ÎÉµÌÊ»ÊÈºÌÌ»ÍÌ¸ÍÊ¸ÌËºÏÌ·ÐÊºËÈ¸ÊËµÊÊ·ÊÈ¶ÊÊµÊÈµÈÈ¶ÊÎ·ÌË¶ÌÍ·ÊÉ¸ËÊ·ÎË»ËË¹ÏÍ¸ÌÊ»ËÍ¶ÊË¸ÌÊºÍÌ¸ÍÌ¸ÍÊ¸ËÌ»ÌÊ¹ÒÌ¸ËÊ¹ÎÍºÊÌ»ËÈºÏÊ·ÌÐ»ÍËºÌÎ¹ÐÍ»ÌÎ»ÍÎ³ÎÍ¸ÌË¸ÎÌ¸ÏÏ¸ÏÌ»ÍÌ¹ÏÎ¶ÏÌºÎÎ½ÎÎ¸ËÊ¸ÌÊ»ÎÎ»ÎÌ·ÌÌ»ÎÍ·ÐÍ»ÏÍ½ÏÐºÒÐºÍË½ÎÐ·ÐÍºÎÌ½ÎÌ¸ÒÎºÏÐ»ÑÏºÎÎ»ÏÎ½ÎÏ»ÐÏºÎÎºÐÊ¸ÌÑ»ÎÌ¹ÊÎ·ÊÌ¸ÈÄ³ÁÁ«¼¶²£w|g{gdz`t[|t_{q_{q`wlUtfWzkQrgWwf[udUtgUtn]ru]tg`qfYonUogSkgQndQigSl`Qk`Qo`WnlWnkUnkSni]nt_trYqkUqiWqgQqbQk`On]Ig_Kg[KfbMfbQidWkdQkbQl]QogSoiUkgSndQogWliUndUrkWkgYngSoiMngWniWonUniOllWkgOo`OgfSibQlbYldOg`QnbQgoYoi[qlWqlUqiUtgUql]qrYutYtq[uoYrnYwrYrrYrlQo`Qn]Uk]Ik]Mi`QkfUnqYnlWqqWtq[tlWtoYwk`xzgziourd{`|r`|rWwi[tq]ztWto`wu_wr_xu`t~`z{`xd||gwz_w_ztkzw`zwbxr[xr[ofYldYlfUl]Ui]SibQg]Ok[SgYMk`Uf]UgfSkdSokYx¬§¼¬³Ã´¾Ã´ÃÊµÇËºÊÏ»ÊÌ¹ÌÌ¸ÉÏ¼ÍÏ¸ÏÌ½ÐÏ»ÍÎ»ÎÐ¾ÐË¹ÎÌ¸ÊÍ»ÌË¹ÎÍ»ÎÎºÌÍºÌÎºÎÐ»ÌÌ¹ÌÍ¹ÏÑºÊÎ»ÊÐ»ÒÎ»ËÎ»ÊÎºÌÊ¼ÌÏ¹ÌÍºÐÌ¹ÊÌºÎË¸ÎË»ÌÎºÌÌ¼ÌÌºÌË»ÎÊ¼ÌÌ·ÊÌ·ÎÊ»ÊËµÌËºÊÉºÌÊ·ÍÈ¹ÌÌ·ÊË¶ÌÈ¹ËÌ»ËÊ»ËÈºÊÇ·ÌÊµÊÌ¸ËË¶ÊÌ¸ÌË·ÊÆ¸ÊÊ·ÊÌµÌÉ¸ÇÌ·ÊÇ·ËÌ·ÌÉ¹ËÆµÈÈ¸ÇÈ·ÈË³ÈÈµËËµÇÉ¹ÈÈ¶ÆÇ¶ÈÈ¶ÇÌµÈÇ¸ÈÊ¸ÉÈ¸ÊÆ»ÊÇ³ÈÉºÈÆ¸ÈÈ·ÊÈ³ÆÆ´ÆÊ¶ÉÊµËÆµÊÆ·ÈÉ³ÉÆ·ÉÄ·ÈÇ´ÇÅ·ÆÆ±ÉÆ³ÆÈ²ÇÃ³ÆÈ¶ÇÃ²ÈÃ³ÈÆ´ÄÅ´ÄÄ³ÆÃ³ÈÃ±ÃÂ°ÄÅµÆÆ²ÅÃµÃÅ²ÇÄ³ÄÃ²ÆÂ°ÅÇ³ÈÂ²ÅÁ²ÅÄ®ÇÄ³ÄÃ±ÃÁ°ÆÁ¯ÄÃ³ÁÁ²ÆÀ°ÁÁ±ÂÁ°ÈÁ®ÃÃ³ÄÁ±ÁÀ­À¿¯ÃÁ®ÅÀ¯ÁÀ±Â¾°ÃÁ®ÄÀ±ÀÁ±Ã¾¯¿½­¾Á®¾¿°Ã¿¬¾Á¬Á¾±À¾«¾¾²¿¿®Ã¾­ÁÁ¯Á¿°À»®¾¼¬¾¿®Ã¾¬¾¾«À¼¬À¾®Á¾­¿¾°¾½°¿»¯¿¾«¼½­¾»°¾Á°À»ª½»¯À½ª½½­¿»¬¾»©Ã¾®À¾­Á¾®À½¬¾½¬»¾®Á½«¿¾¬½º¬»¸¯»»©¾»­½»¬À¼«»»­»¹©»º§¼»©»·©º·©¼¹ªººª¸º¨¼¸ª¹¶§º·«»·«½·¨º¸©¾·¦¼µ©»º§»¸§ºº§¸º§¹·§·´§¸³¤º¶¤¸µ§·¶¥··§¹³¥·´§·µ¦µµ§·´¤¸´¡»³¢·³§·µ¬¸½¬¼¼®Á»ªÂ¾°½À­¾¿®ÁÀ¬½¿ªÁ»©ÁÀ®Ã¼©¿¼¬Á¼¬¿¿¬Á¾­Â¾¬À¹¬ÁÀ®Ã¾­½¾¯ÁÀ¬ÁÁ¯Á¾®À¼­Ä¼®À¿±Ã½«ÃÁ¬À¿®ÁÁ®Á¿«Â½¬¿Á°ÆÂ¬ÂÂ­¿À±ÃÁ®Ã¾«Ã½¬ÀÁ«Â¿¯ÂÀ¯ÄÂ¬Á¿«ÃÃ°ÄÂ¬ÂÀ°ÂÂ­ÆÁ±ÅÃ±Ã¾¯ÃÀ¬ÃÀ°ÂÂ­ÅÁ²ÃÂ®ÂÁ¯ÆÂ²ÄÁ°Ã¿²ÃÃ¯ÂÁ°ÃÁ¯ÅÁ°ÃÅ®ÄÁ³ÇÃ³ÇÁ°ÈÁ´ÃÆ³ÆÆ·ÈÄ²ÅÂ¶ÈÅ³ÈÄ¶ÉÄ¯ÈÊ´ÊÁ³ÈÀ³ÅÈ³ÊÆ³ÆÇ°ÈÅ¶ÈÇ³ÈÃ³ÈÆ·ÊÄ´ÈÆ´ÈÊ³ÉÉºÈÆ¹ÇÈ¶ÊÆµÇÇµÌÈµÉÆµÊÆ¶ÈÉ´ÊË¶ÊÊµÌÊ¹ÈÉ·ÌÈ³ÊÆ·ËÇ¹ÈÈ¸ÌÆ¶ÊÈ»ÌÊ¶ÈÇ»ÊÉµËË¶ÌÈ¶ÌÊ·ÎÌ¹ÌÇ¸ÉÈ¹ÌÎ¸ÊÎ·ÌÉ·ÎÌ¶ÎÉ·ÌÉ·ÌÊ¸ÐÌ¶ÌÊ·ÍÈ·ÎÈ·ÉÉ¹ÊËºÍÍ·ÎÊ¼ÍÊ¸ÍË½ÍË»ÌË¸ÐÌ¼ÍË»ÑË·ÎÊ¸ÏÍ¸ÏË¾ÎÍ»ÎË¹ÌÉºÍÎ»ÐËµÎÎºÌÌ¼ÌÌ»ÒÍ»ÐÊ»ÎÍºÎÎ½ÏÌ¼ÍÐ½ÑÍ¼ÏÍºÎÌ»ÐÍ¼ÎÎ¼ÎÎ¿ÏÍ¼ÎÎ»ÐÎºÒÐ¼ÑÎ»ÐÎ»ÏÍ»ÑÌ¼ÎÐºÑÌ»ÏÊ¹ÒÐ¼ÒÍ»ÍÌ½ÍÑ¾ÐÐ»ÐÐ¼ÒÐ½ÓÐ¾ÏÑ¾ÑÑ¾ÒÒ¼ÒÑ¼ÐÎ¿ÒÐ»ÑÏ»ÐÍ¾ÑÓ¹ÐÒ¾ÐÑ»ÏÐ½ÒÑ¹ÎÌ¿ÒÎ»ÌÑ½ÑÐ¼ÐÎ»ÎÎ»ÎÏ¿ÎÐ¿ÒÍ½ÏÍ¼ÎÑ¿ÒÐ»ÔÏ¿ÐÐ»ÑÒ»ÑÍ¾ÐÎÀÑÑ¾ÓÒ¾ÑÐ¿ÕÑ½ÐÐ¿ÔÐ¿ÒÐ¾ÒÒ½ÖÐ¾ÓÐ¼ÒÐ¾ÒÒ¾ÑÏ¼ÐÕ½ÔÒ¿ÒÒÀÖÒ¿ÓÒÁÕÒ»ÕÏ»ÒÔ¾ÑÕÀÓÒ¾ÒÑ¼ÒÐ¿ÒÒ¾ÖÓ¿ÓÓ½ÔÐ½ÓÒ¾ÕÕÀÓÒÁÖÒ½ÒÑ¿ÒÒ¾ÖÓ¿ÔÑÂÓÓÀÓÓ¿ÓÐ¾ÓÓÀÔÓÁÓÕÄÓÒ¿ÔÒ»ÔÑ½ÎÐ»ÐÓ¿ÍÏ¾ÎÐ»ÊÊ´Êº®º²¡±£§tnwtknngniwfz`~izdx[x`ufzbk[{g_unWwfUwg]xfWqf[wkUqiWwi[ui[un]wqYwtix|b{bzkfwo_ur[xn[qkYwlYuiUrd[oiYok[uu_xo[zoYuq[rl]uobqr[roYwn_uu]tq]{u]uudxnf{z_zu`zrbwtbwr`ut]un[xi[ok]xt]un]rn]qn]zo_uudzwfzzlzd|x`zqd|rbzub~zbwxi~f~gxl~i{_~r]zn`ziUxfWrg]ro[uo_ztb~u[{wfzg~bd~ltu~~{rli|f~g{b{d|igninutrtnk{n~llzg|tduldwkWwk`qu[to]tf]ndOkk]nl]qi_qi[tlb{q¯¡©»°¹Á­¿ËºÆÏ½ÌÒ¾ÎÐ¾ÐÒÀÐÕÁÔÒÀÓÓÀÒÕ¾ÖÐÁÒÒ¿ÒÕ¾ÓÒ¾ÑÓ½ÔÒ¼ÐÏ½ÐÑ¾ÐÒÀÐÒÀÒÒÀÐÕÂÒÒÁÕÒÁÐÓ¾ÑÒ¼ÕÑÁÕÔ»ÑÍ¾ÐÒ½ÎÑ¾ÐÑ½ÒÒ¼ÐÒÁÒÕ½ÔÌ½ÐÐ¿ÎÒ¼ÐÑÀÕÎ¾ÒÏ¾ÐÑ¾ÐÒÁÒÒ½ÎÎÁÑÐ»ÍÍ¾ÎÑ½ÐÏ½ÎÑ¾ÐÎ»ÑÍ»ÍÍ¿ÌÒ¿ÑÎ»ÎÐ¾ÕÑ¼ÎÑÀÒÐ»ÓÎ¾ÎÍ¿ÒÍÀÏÐ»ÑÐ»ÐÊ»ÌÐ»ÐÌ»ÏÊ½ÌÐ¼ÐÍ»ÎÊ»ÌÎ¹ÍÎ¸ÎÐ¼ÐÌ»ÎÍ¼ÑÌ¹ÍË»ÎÍ½ÐÍ»ÎÌ»ÍÎ¾ÐÌ»ËÊ¾ÐË·ÎÎ»ÇÉ¼ÌÎ¼ÌÊ¹ÍÌ»ÎÌ»ÎÊ¾ÌË¼ËË¼ÐÊ»ÌÉ»ÌÊ¹ÊÍ·ÍÌ¹ÊÍ¹ËË¶ÊÌ½ËÊ»ÌÍ·ÌÈ·ËÊ¶ÍË»ÊÊ»ËÊºÌË·ÌÌ¹ÊÇ¶ËÊ´ÊÈ¶ÌÈ¹ÊÉµÈÇ¶ÉÈ·ËÈ·ÌÆ¶ÉÆµÈÇ¹ÈÉ¶ÊÈµÇÈ·ÈÇµÈÆ·ËÆ¶ÈÅ´ËÆ´ÉÅµÊÄ³ËÅµÊÆ¸ÈÈ·ÈÅ´ÆÆ³ÅÇµÊÅ³ÊÆ¶ÆÅµÆÇ¶ÇÃ´ÈÅ²ÆÄ±ÅÃ¶ÉÃ¶ÅÅ±ÄÂ±ÃÆµÆÄ·ÈÅ´ÆÁ³ÈÆ¯ÄÄ¯ÅÅ´ÃÄ³ÆÁ³ÂÂ³ÃÂ±ÅÃ°ÃÆ¶ÆÃ²ÅÁ³ÂÃ³ÂÃ¶ÅÅ´ÃÂ³ÃÂ²ÅÂ³ÃÁ³ÂÁ´ÂÃ¬ÃÁµÃ½³ÃÁ±ÃÄ²Ã¾±ÂÃ´ÃÁ±ÂÁ³ÁÁ°ÅÁ³ÂÀ°Ä¿±ÆÂ±ÃÃ³Ã¾°À¾±Â¿³Á¿³Å¼±½¿±ÁÀ¯Â¿°¾Á®Á¾¯¾½¯À¾°¾¾®¿»¬À¼¬¾¾¯¾¼¬Á¾¬½¼«½¼®À½¬¿½¬¿Á¬À¼®À»®¾»¬À¾©¼»¬½¹§¾»§¹¹§¼·¬»»¬¼¸§»·¨½»«½º«¼»¬½º§½³ª»¶¬½°¢´¶¦ºµ¥··¤»´¥¹µ§»¹¨»»ª½·¨¹º¥»¸§½¸ªºº¦½»¥¼ºª¼»ª¾¸ª·º©¹º©½¹§½¸©¼·ª»º¨»»©»¼«¾»ª»¸§»»ªºº§½³§½·§»º©½¸§¾º©º»«¾»§¾¹©½»§»º§¾ºªÀ·«¾º¦¿»©¿·¨»º©½»«½º¬½¹ªÁ»©¾º«½»«Â¾¬¼»¬¿¾¨¾¹©½¼«¿¿¬Á¼«À¹¬À¼¬Áº¨¾½ª¿¾ªÁ½ªÁ¾®½¾¬Â½«Á¾ªÁ¾¬Á¾¬ÃÀ°Ã½°ÄÁ¬ÃÀ®ÂÀ©¾Á­Ç¾²ÆÀ®Á¿­ÃÂ¬¾¾«ÆÄ°ÅÁ¯ÇÁ¯ÃÃ³ÅÃ¯ÃÃ°ÃÁ°ÃÂ¯ÃÄ­ÃÃ±ÅÂ°ÅÃ³ÇÂ²ÆÃ¯ÃÁ²ÅÅ°ÈÁ³ÄÁ¯ÅÃ²ÆÄ³ÅÃ³ÄÃ³ÄÄ°ÃÂ¯ÄÃ±ÃÅ³ÆÄ¬ÇÅ®ÇÅ³ÆÄ¯ÇÄ³ÄÆ±ÆÄ°ÅÄ´ÇÅ²ÆÉ±ÊÄ´ÇÃµÇÇ²ÈÄ´ÇÇ´ÇÆ°ÉÆ³ÄÆ³ÈÇ¸ÊÃµÈÅ³ÇÇ²ÉÇ´ÇÆ³ÈÈ²ÊÇµÊÄ´ÈÉ³ÈÈ³ËÆµÈÆ±ÈÈ³ËÈ¶ÆÊµÍÇ²ÅÄ³ÊÇ³ÈÈ·ÊÇ³ÈÅ´ÈÄµÊÈµÈÉ·ÆÈ·ËÇ¹ÈË´ÊÊµÊÇ¸ÊÊºÉÊ¸ÊÊµÍÉ¸ÊÇ·ÌÈ·ÌÉµÈÈ·ÊÊ¸ËÇµÍÉ·ÊÊ³ÊÆµÌË·ÌÇ°ÈÇ·ËÈ¹ÊÇ¸ÊÊ³ÊÉµÎÌ¸ÊÌ·ÍÌºÌË·ÌË·ÌÊºËÌ¹ÐËµÌÌµÌË¹ËÍ¸ËÊ¸ÎÎ¹ÌÎ·ÏÊºÍËµÌÏ¸ÎËºÍÈ¹ËÊ·ÊË·ÌË¸ÎÊ·ËÊ¹ÊÊ·ËË¸ÈÉ¸ÊÈ¹ÌË·ÌÌ»ÌÌ¸ÌÌ·ÌÎ»ÍÌ¸ÎÌ¸ÏË¹ÌÌ»ÏÐ¸ÌÌºÎÌ¹ÏÌ¸ÊÏ¹ÑÌºËÍ·ÌËºÎÎ¸ÎÌºÍÎºÌÌºÐÌ»ËÎ¹ÌÏ»ÐÌ»ÎÊ¸ÏÎ»ÍÌ»ÍÍºÐÐ»ÎÌ»ÑÏ»ÎÌºÑÏ¹ÐÉ¸ÑÌ¸ÒÎ»ÑÎ¹ÎÏºÐÏ»ÎÌ»ÑÌ¹ÑÏ»ÎÌ»ÎÌ»ÐÎ½ÑÒ¼ÌÌºÐÌ¸ÎÌ¸ÌÏ»ÐÎ»ÊÏ»ÌÍ»ÏÆ´ÈÆ³ÊÄ²ÈÁ¯Ä»°¸¶§µ¡§qubo`|f|dqd{ud~{bt`xw`|f|_lklig~uk{lYwg[|gQw`QqiOtbMn]Qi_In`Ok[IkbMn]Mk`UqdQlfQliSqgYqt[qnUriSolQoiOkdWliMndOkdQndQigUklUlkUrgSngUniKlbKndYoiWniUnlWnkYllUnoYqq]uqYwr`otYon_qn[qiYonYnkUldSnf]wkYooYoqYnoYro_uu_wx]xt`ut_wqWunWtoWwr`tlYwndwtfxx[{t_xrUtqYurWtnQriWobOogQo`SukOuq[wnYurYrz_|{_~{o|ntztrkngifd~g|ddddggrukinzfxf|o_zn_tnYrkQq`OifQg[YkbSk_QbYMbUMf[MidWk]MidUqdYqxl¥¨»¬µÆ³¾È¶ÆÌ¶ÈË¼ÊÍ¹ÌÌ»ÎÐ»ÑÎ½ÎÏ¼ÑÏ½ÎÉ¸ÎÍ·ÌÎ¼ÎÍ»ÍÑ½ÎÎºÌÌ¹ÎÍ½ÐÎ»ÐÏ»ÏÏ¹ÍÍ¾ÐÏ¼ÎÌºÍÎ¸ÎÏ¾ÏÎºÏÍ¼ÌÌ»ÎÊ¸ÌÌ»ÌÌ¹ÎÌ½ÌË¼ÎÎ¹ÌÊ¹ÌÌ¸ÊÎ½ÏÌ¸ÊË»ÊÌºÌË¸ÌÊ»ÎÊ¶ÌÊ´ÊÊ·ÊÌ¹ÌÉ·ÌÈ·ÌÊ¸ÊË¸ÌÈ¸ÊÌ·ÌÊ·ÎÊºÉÇ¹ËÊ¹ÊÉ·ÌÌ»ÎÊºËÈ·ÍÊºËÈ»ËÉ·ÊÊ·ËÌ¸ÌÌ´ÊÊ¸ÌÈµÌÇ³ËÆ»ÈÈ·ÊÈ´ÉÊ¸ÈÊ¸ÈÊµÈÆ³ÇÅ·ÈÈ´ÈÆ³ÈÈ·ÉÇ³ËÈ¶ÈÆµÇÈ´ÇÅ¶ÈÇ¶ÆÇ¸ÊÆ´ÆÈ·ÈÇ·ÇÄ´ÈÇ³ÉÈ·ÈÆ³ÅÆ·ÅÆ´ÇÆ³ÇÆµÊÆµËÆµÄÅ³ÅÄ·ÆÇ²ÈÃ´ÃÆ³ÃÄµÉÃ³ÆÅµÇÇ³ÃÄ´ÅÆ±ÆÃ²ÆÃ³ÆÂ³ÆÅ°ÃÃ²ÆÁ²ÄÂµÆÄ³ÆÂ¯ÃÄ²ÄÃ²ÃÃ°ÄÂ°ÆÂ±ÅÄ²ÆÁ²ÄÂ²ÄÁ³ÃÄ°ÄÃ­ÅÀ®ÂÃ±Ã¿®Ã¿°ÁÀ°ÀÁ¯ÅÂ°ÃÃ±ÂÁ¬Á¾®Á¿°Â¿±ÀÁ­À¾²Á¾°¾¾®À¾°ÀÀ®ÁÀ­¾»®À¼¯Ã¼®¼¼¬Â¾­Á¾¬½»¬¿¿¬ÁÁ¬¾½¯¾»¯Â¿¯½¾®¾¿°¾¿®¾»¬Á½±½»°À½«¾½±¿¾«¾»ª¿º¬»½®Á¹­¿»­½»«¾»¬¼·¬½¿«¾»ª¿½¬½¼¬¾¿«¾¼¬À½­½»©¿º­¾¸¬¾¾¬¿»®»»ª¾ºª»¼«½º©½´«»¸§»º«»¸ªº»«¸·«¼¸©»¶ªºµ¦¹¶¥º¸¨·¸§¸µ§··©¼·¦¸¶¨»µ¢ºµ£·¸¤··¤º¶£·³¨··§ºµ¨·´¢·µ¦¸·¦¸³§·´¡·µ¥¶´¦»¶©¹¾®À»«»¿¬¾¼¬½¿­À¿ªÃÀ­¼»®»¿¬À½±Â¼¬À¾¬ÁÁ¬¿½°Æ»®Àº­Á¾¬¾À®¿¾§Å¾®Á¿¬¿Á¯Ã½¯¿Á­ÁÁ¯ÁÁ®ÀÂ±Ã¿¬Á¿­À¾®ÁÁ¬À»©½¾­ÃÁ±ÂÁ±Á¿®ÁÃ¯À½¬Ä¾¯Ã¾¬Á¿°ÁÁ®ÁÀ®Ã¾¬ÄÁ­ÆÀ¬Á¾¬Å½²À¿±Ã¿«ÅÁ­¿Á²ÅÁ¬ÅÀ³Ã¿±ÆÄ­ÄÁ¯ÆÃ³ÄÆ³Ã¿¯ÅÁ³ÄÂ±Æ¾ªÅÄ±ÄÁ³ÅÀ¯ÆÂ³ÃÄ°ÈÈ±ÇÃ³ÆÅ²ÇÆ¯ÉÅ³ÆÆ¶ÆÉ³ËÆ³ÆÂ³ÈÅ³ÈÅ¯ÅÅ²ÈÇ´ÊÆ³ÈÆ·ÈÈ³ÊÅ¶ÆÈµÈÆ¶ÇÆ´ÊÆ·ÊÈ¹ËÅµÊÆµÈÊ¶ÊÆ³ËÅ·ÆÇ¶ÈÈ·ÉÆºÊÆ·ÉÈµËÈ·ÉÉµÌÉ·ÈÈ¶ÉÈ¹ÈÌ·ÌÈ¸ÈÇ¹ËË¶ÌÈ·ÎÈ¹ËË¹ÎÌ·ÉÈ»ÌÊ¸ÊÈµÌÊºÌÌ·ÌÉ·ÎÈ»ËÌ¹ÎÎ»ÎË·ËËºÌÎ¹ÎË¸ËÇ¶ÌÊ¹ÎÌºÌÊ¹ÌÊ·ÏÊ¹ÎÊºÌÌ·ÌÌµÍË»ÎÌºÍÎ»ÐÊºÍÌºÌÎ¹ÍÌ»ÍÊ¹ÌÊ¹ÐÍ·ÍÊ·ÏÐºÌË·ÌË»ÌÌ»ÐÎ¹ÈÎ¼ÐÎ¹ÎÎÀÐÎ¾ÒÍ½ÒÎ»ÐÎ¼ÎÌ·ÒÎ¹ÐÍºÏÎ¾ÐÌºÎÌ½ÑÏ¾ÎÎ½ÒÌ»ÎÐºÏÌ»ÒÌ»ÎÌ»ÑÍ¸ÐÌ¶ÒÍ½ÒÎ»ÒÎ»ÏÏ¾ÒÐ¾ÐÎ¼ÐÒ¿ÐÐ¾ÐÒ¼ÒÐ¾ÓÎ»ÎÒÀÑÒÁÑÐ¼ÒÐ½ÎÍ¿ÑÐ¼ÔÓ½ÒÏ¾ÐÐ¾ÔÐ¼ÏÍ¾ÐÐ½ÓÑ¾ÒÏºÎÎ»ÎÏ½ÒÎºÐÎ»ÐÓ»ÒÒ½ÏÐ½ÑÒ¾ÒÒ¾ÒÎ¾ÕÐ¼ÔÏÂÒÐÁÔÐ»ÐÑÀÑÓ¿ÖÐ¾ÎÒ¹ÐÐÀÓÒÁÒÏ»ÓÒÀÓÐ¾ÑÓ¾ÔÎÁÒÒ½ÑÒ¿ÓÐÁÓÒ¾ÕÑ¾ÔÒÂÕÑÀÖÕ¼ÒÑÁÕÓ¿ÒÐÁÓÓÃÓÒ¾ÒÓÁØÓ¾ÔÐÁÓÒ½ÒÒ»ÕÐÀÓÒ¼ÒÐÀÓÎ¿ÐÔ½ÔÒ¾ÒÎÁÔÒÁÔÒ¾ÕÒ¾ÔÕ¿ÖÓ¼ÒÑ¿ÔÑ¾ÎÓ½ÑÈµÍÆ³ÉÆ³ÃÊ¯¿¹¨·£­|~ozkw`uin{k|inorn{i|gw{xxu§xqnlzlzbq]|n`|nYznUwgUun[uo]|i`zkWuiUwn_zoYzq]{rbwr[{ub~o]uofww]zo_xr`qt]woWoq]tuYxu_unbuo]tk[wq]ur]wt[xw]xobxwbztfzzg{~f~zfxudxwl|z`{qdwrbxo`wrbxldzobxtd~wfzo]wrb{u_{r`|uf||i{d{xd{|d_wd~zfzbrfugzbzf~~b||d~d~ubz~b~zb|ug~{`wfwg|gku|~{qxurwuwqurtutuw|zxwwt{krbzw`xl_xkSwk[xi[rgYrbWlbUobSn_Wof[ok]qk_og[tq`|oµª²ÈºÁÈ»ÈÏºÊÒ½ËÓÂÒÓ¾ÑÒÂÓÐÁÔÕ¿ÓÒÁÒÑÀÑÐÀÐÓÂÕÑ¿ÓÒÀÓÐ»ÎÐÃÒÓÁÓÒ¿ÒÑ¾ÓÒÁÒÓÀÒÐÀÔÒÃÒÓ¿ÐÐÁÒÐ¾ÐÒ½ÑÒ¼ÓÎ¿ÐÎÁÐÐ½ÐÑÁÑÓ¿ÓÐ¾ÓÐ¼ÒÔ¾ÑÑ¿ÑÑ¿ÎÐ¾ÏÑ¾ÒÎ¾ÒÌ¾ÑÐ¼ÎÎ¼ÏÎ½ÑÎ¾ÑÎ¼ÒÑÀÒÐ¿ÐÐºÎÍ¾ÏÒ»ÑÐ½ÑÎ¾ÒÒÀÎÑ»ÐÎÂÐÌ¾ÎÐ½ÐÎÀÎÑ½ÐÍºÏÍ»ÌÎ½ÑÍ¾ÐÐ½ÐÌ»ÍÐºÌÒºÐÊ»ÍÌ»ÌÎ»ÎÌ¾ÎÌ¾ÑË»ÎÍ½ÍÌºÐÌºÎÎºÎÍ¾ÍÎ·ÏË»ËÌºÌÌ»ÒÌ¼ÎÊ¾ÉÍ¼ÍÌ»ÌÌ¾ÎËºÍÍ»ÌÍ»ÍÏ¾ÎË·ÊÈ»ÌÊ»ÌË¸ÌË»ÎÊ¹ÌÌ»ËÈ·ÌÇ»ÉÊ³ÊÈ·ÍÈ»ÉÉ·ÈÊ¹ÉË¹ÎÈ·ÊÊºÉÊ¹ÌÊ·ÌÊ»ÉÆ¹ÊÅµÈÈ·ÊÅºÉÉºËÈ·ÈÊµÉÈ»ÊÈ´ÈÅ»ÇÈ´ÊÊ´ÈÉ¹ÇÆ·ÇÇ´ÈÆ´ÉÆ¶ÈÅ´ÈÃ·ÈÃ´ÈÅ·ÇÅ¶ÆÅµÉÈ·ÈÂ³ÆÄ·ÇÈµÆÄ·ÇÃ³ÅÂµÆÃ²ÆÅ·ÄÅ´ÆÁ°ÅÃ³ÂÄ³ÇÂ´ÃÃ³ÃÃ¶ÆÄ²ÆÁ´ÂÁ°ÆÃ³Ä¾³ÂÄ³ÄÀ¯ÁÂ±ÅÃµÆÂ°ÂÅ¯ÄÃ³ÆÄ°ÄÄ±ÃÁ²¿Ã´ÅÁ°ÄÂ±ÃÁ°ÃÁ³Ä¾³ÁÂµÆ¾¯ÀÃ³ÂÀ°Á¿³Á½°ÁÅ³ÁÂ²ÃÀ´Á¿²ÅÃ³ÃÃ²ÁÁ²ÁÀ¯ÃÀ³ÁÁ´ÀÁ°Ä¾³ÁÁ³À¿°Á¾³Á¿²¾»®ÁÁ­¿¿¯À¾¬Á¾³ÀÀ°¿¿¯¿¾«¾¾®¿¾­¿¾®Á¼ª¿¾°ÀÀ­À¼±¼º¬¿¾«¿¿®»»¬¼»¬¾¼­¼º­»»ªÀ½¬½»ª¼»¨»º¨¾¹¬½¹¬¼»¬¾º¨½°¦³·¦»·¨º¸§»º¤ºµ©º½«ºº©¸¹§¼¸©»·£¹¶©¼¸¨½¸¥º¸¦º¶¬½¸¥¾·¨¼¸¬¾¸§¿·«º¸©»º¨½·«½¹§»»ª¾·©¾µ¨½¹©½»©¼»©¿¸©»¸«¾¹§»·©¾½¨»¸©½»ª¾»ª¾»«¿¸ª¾º§¾¾©»¹¨¾»¬¿¸§½º«¼º¨¾¾§¾»«¾»§À½«¿½¬ÁÀ®¾¾¬Â¼©À»¬¿½©¾¾«¼»ªÁ¾«¿¾¬Á»ªÁ¿¬ÁºªÀ»«À¼«À¾§Á»±Ã¾¬Ä½­¿À®ÁÃ°ÂÀ­ÁÁ±ÃÁ°Ä¾¬Á¾¬Æ¾¯ÄÂ¯ÄÀ­ÁÃ®ÅÁ­ÄÁ¬ÄÃ±ÄÁ¬Å¾¬ÃÃ²ÃÂ±ÅÂ¯ÅÃ³ÃÃ¯ÈÀ±ÄÁ°ÄÃ´ÃÃ¯ÆÀ²ÅÄ¯ÆÁ¯ÆÄ±ÈÁ³ÄÃ±ÆÂ²ÆÇ²ÆÅ¯ÇÃ­ÃÃ²ÆÆ±ÆÃ³ÇÄ²ÇÄ³ÅÆ°ÆÄ²ÅÆ³ÆÇ³ÆÄ²ÈÅ³ÊÄ°ÇÃµÆÆ³ÊÃ³ÇÁ°ÇÇ´ÉÆ³ÉÇ³ÇÆ´ÆÆ¯ÈÄ´ÇÆ·ÊÆ´ÈÅ²ÆÇµÊÄµÇÃ³ÇÊµÊÇ³ÈÆµÈÇµÆÆ´ÌÇ·ÊÈ¹ÊÆ³ÈÉ²ÇÈ·ÈÈ´ÊÇ³ËÅµÉÆ·ÈÈµÊÈ·ÌÈ³ËÆ·ÊÊ³ÌÈ¶ÉÇ´ÉÆ·ÉÊ·ÊË´ÊÃµÊÈ·ËËµÎÆ´ÈÈ·ÊÌµÏÊ·ÊÇ¸ÈÊ¹ÎÈ¶ÊÈ¶ÎÇ¶ÎÅ³ÊÇ¸ÈÈ·ÌÉ³ÊÉ³ÍÉ´ÏÊ·ËË·ÌÌ»ÌÌ¹ÌËºÍÊ·ÌÉ·ÒÌ»ËÉ¸ËÌ¸ÎÌ¸ÍÊºÐÐºÍÊ¸ÌÌ»ÌÎ¸ÏÊ¸ÏÉ·ÌÊ¸ÌÎ¶ËË¸ÌÆ·ÌÉ·ÎÊ»ÎÉ¸ÎÊ·ÌÇ»ÎÌ¸ÎÍ¹ÊË¸ÊÌ·ÌÌ¸ËÊ¹ÌÍ»ÉÎ¸ÏÎ¸ÌÎ½ÏÍ¸ÌÎ¹ÎÍ¸ÍÉ¶ÎÉ·ÊÌ¹ÎÌ»ÌË»ÎÌ·ÎÌ¼ÌË·ÌÊ»ÍÏ¹ÏÌ¼ÎÍ·ÎÌ¼ÎÏºÎÎ»ÐÎ¼ÏÍ¹ÐÍ»ÎÍ»ÏÎ½ÏÍºËÎ¸ÏÎ»ÎÎ¼ÐÍ»ÎÌ¶ÑÌ¹ÒÍ»ÌÊ»ÍÎ¼ÐË»ÌÎ»ÎÍ¸ÎË»ÎÌ»ÏÏ»ÎÉ¾ÊÊµÏÊ¹ÊÈ¸ÇÄ³ÊÁ®ÃÁ¬¾¾­½´¤²£{t`k]g_zqY|w[zq[zw`|z_|xg|n~knk~gn{olqo{ttnkf~t_{tW{kYul[wiYux_t|`rubtqYtgUrdMrf]riUngQtgSqg[rkQqgSoiUqiStg[rtYwfWr`QliYrtYqt[uiYogWqkYnfYqkQtkSnqWroUwq[wq`tnYroWrl]nu]tkYul[ro_to[to[lnStnYtl[ql]rqStoUtgWriUwoYur_xxdxuY{t]wx]zzYzt`|zbzwYo_zn[|rWxq]xw]xw]{t`uzl~d|d|t`ztYzq[zo`~{f|uzwwtlxgullnuzxtdqgilqrurooiqf|nYzqYrlWubUo`QkYWl_SgYKfYMgUMfYDdQOf[UidIl]QibWok`xx¹§²À±½È³ÇÊºÈÌ»ËÊºÌÎ¼ÌÌ¹ÍÎ½ÌÌ»ÎÏºÎÊ¾ÍÎ½ÎÏ¹ÎÎ¹ÌÌ¼ÊÎºÌÈ½ÍÐ¼ÏÌºÌÏ»ÌÎ»ÌÎ»ÎÌ¸ÍÎ»ÌÌ¹ÎÎ»ÎË»ÍË¹ÌÍºÍÌ»ÌË¹ÐÌ¸ÌÌ½ÌË¸ÏÍºÎÎ½ÏË»ÎÍ»ÎË»ËË¾ÌÉµÍÌ»ÍÊ»ËÌ·ÐÉ¼ÌÌ¹ÊÌ·ÌÌ¸ÈÈ¸ÍÌ¸ÌË¸ËÌ¶ÈÊ·ËË·ËËºÎÊ¸ÊÈºÊÌ·ËË¹ÍÊ·ËÈ»ÊÎ¸ÍË·ÊÊ¸ÊÈ¸ËË¹ÎÈµÈÈ·ËÈ¸ÌÉ¶ÇÈ·ÈÆ²ÇÇµÈÆºÊÊ¸ÊÆ²ÈÇ³ÆÆ¶ÌÆµÊÆ·ÇÉ´ÊÇµËÇ¶ÊÆ¶ÊÊµÈÉ»ÊÈ·ÈÆµÈÆµÊÅ·ÈÇ·ÉÃ·ÆÈ³ÅÆ·ÇÆµÈÆ³ÆÇµÈÃ²ÄÄµÆÃµÅÈ³ÁÆ¸ÆÆ´ÆÄ´ÇÅ³ÃÇ±ÄÃµÇÆ²ÁÅ´ÅÄ·ÄÂµÈÃ±ÈÄ®ÃÂ³ÂÃ³ÇÀ±ÆÄ³ÇÆ¶ÃÄ³ÇÁ³ÃÃ³ÃÄ´ÄÁ°ÄÄ¯ÆÃ¯ÃÃ²ÃÀ³ÄÂ°ÃÃµÂÁ¯ÂÁ²Á¿²ÄÁ±¿Â®Å¿®ÃÃ±Á½±ÄÃ°Á¾®Á¿¯Ã¿®Á¾®Á¾¯Â¿®ÃÀ°ÁÁ²¾Ã«Á¾¬À½±ÀÁ«Á¿¯Á¾­À¼¬Á»­Á»¬ÀÁ«¿¾«¿»®¾¾­Ã½­ÁÀ«¾¾¯Á½¯ÀÀ¬¾½¯¾¿«Á½®¼½¯Á¾¬»»«¾º®½¾«¿»­¿»¯¼½«¼¼­À½ª½»®¼¸¬¾¼¯»¼®¾½¬»¾®À¼­À»©»¼¬¾¼¬¾¾­»¾«¾»¬¿ºª¾»­½¸­½¹«¾¸¬¼»ª»»ª»·©»º«¸¹«»»ª»½¦º¹©½·©¸¹©¹¸¬»µ©»¹£¹¸¨º¸§¹µ«··¥¸µ¥ºµ©º°¤¸·¨¼³§¸´©»µ¦¶³¤¸µ¨¶¶¨»µ¥·³¦··§¹·£·³¬»»¨¾¾ªÁ»¬Á¼¬À½±ÂÁ°¿¿¬¾»¬ÂÀ«¾½©Â»­Ã½¬Á¼¬Â½¬À¼®À¿­Â¾¬ÁÀ®À¾­Â»°¾¾®Â¾¯Ã¾¯À¿¬Á¿¯Å¾¬À¾¬À¾¬Â¾©Á¾­Å»®¿À©À¿¬ÀÁ®ÂÀ¬ÃÁ®ÃÀ°Ã¾­Á¾®Â½²À¿­ÂÁ­Á¾°ÂÂ°ÃÀ®Â¿±Ã¿®ÃÂ¯ÃÂ±Å¾°Ã¿°ÁÀ­ÃÃ°ÃÁ®ÇÀ®ÁÀ¯ÆÃ®ÃÂ²ÃÀ°ÄÁ¯ÅÃ²Å¿µÅÀ°ÆÃ²ÅÁ²ÄÅ²ÆÁ±ÆÃ³ÄÆ²ÆÃµÆÂ±ÈÃ±ÅÃ³ÈÅ´ÊÃ´ÈÅ·ÅÃ³ÊÂ·ÇÆµÆÅ´ÆÊµÊÊ¶ÊÃ³ÇÄ´ÊÇµÈÄ´ÆÆ·ÉÆ³ÊÅ·ÊÆ»ÊÆ³ÊÆ´ËÇ·ÊÇ¸ÊÅµÈÊ·ÈÈ´ÊÆ·ËÇ·ÊÅ¶ËÇ·ËÈ´ÈÇ¶ÊÇ¹ÊÈ·ÌÌ·ÌÉµËÊ¶ÌÇºËÈµËÈ·ÉÈ¸ÍÉ¸ËÈ·ËÉ¹ÊÉ¶ÌÎ¸ÌÊºËÉ·ÍÊ¹ÎÉ·ËÊ¶ÌÊ¹ÎË·ÍÌ½ÍÈ¸ËÉ»ÍÌ¸ÌÊ¶ÎË¸ÌÊ¹ÎÊºÎÊ¼ÌËºÌË¶ÍÊ»ÌË»ËÍºÎÉ·ÍÊ»ÎÎ»ÎÎ¸ÎÌ¾ÌÌ·ÐÊºÌÊ¹ÎË»ÍË¸ÐË¼ÒÎºÎÐ»ÏË¹ÎÉ»ÌÎ¹ÐÌ¼ÌÏºÍÍ¹ÓÌ¾ÐÎ»ÑÌ»ÐÎ¼ÎÍ¿ÐÎ¼ÏÌ»ÎÎ»ÐËºÐÌ¼ÐÊ»ÏÍ»ÎÌ¸ÌÍ¸ÑË¹ÐÍ·ÐÌ»ÏÎ»ÑÍ»ÐÍ½ÒÏ¿ÒÐ¾ÒÎ¾ÒÍ¾ÒÎÀÓÒ»ÎÒ¼ÒÒ¾ÒÐÁÓÏÀÓÐ»ÐÏ¾ÑÑÀÕÑ¾ÐÌºÐÍ¾ÐÏºÑÐ¼ÐÐ¾ÒÐ¾ÑÌ»ÐÌ½ÑÏ½ÑÐ»ÑÎÁÒÐ½ÑÑ¼ÐÎ½ÒÐÁÒÐ»ÒÐ½ÑÓ¾ÔÐ¼ÓÒ¼ÒÍ¿ÓÐÀÒÒÀÕÌ¿ÒÎ½ÒÒ¾ÔÐ¾ÐÒ¾ÔÎ¿ÒÑÀÒÒ¾ÓÎ»ÓÐ¼ÑÒ¾ÒÒ¿ÐÓ¿ÔÒÀÔÒ¾ÒÐÃÕÒ¿ÓÐ½ÓÓ¾ÒÐ¾ÒÐ¼ÔÐ¾ÔÒÀÕÒÀÑÐ¾ÒÐÁÑÕ¾ÓÓ¿ÖÑ¼ÒÐ¿ÕÓ¾ÒÐ¿ÒÒ¿×Ï½ÓÒÀÒÓ½ÓÒ¾ÕÓ¿ÖÑ¾ÒÒÁÔÍ·ÍÈ»ÌË³Æ»¬Áª µ¤|x{kwktf{igwnnk~q|go{ornw¡z¦{£{qoouok~gxf|f{dqrk~f{bx_||f{zfzrb{o[xw_|q]{u[zq_zoY{ibui_zl`xo`rwb~i{i|k{{k~fzqg{oY|tbzwf|zb~wdw~i{zfu`ui|~gnix`{wg{wd{ud{ud{tizt`xwg|u_|xd~x`o_|tb|rf~dzi~{g|kittinld{i|izdl{k~luoi{gln{i¤~{oquwwr~u² xultgxfkt~zzxn{nw`zf~xg~t`|o`{b]xdYwfWu`[nd[qbQk]So_WriYog]of[zkd|~n¬ª¿®¶È¶ÃÍºÈÑ¾ÍÐÂÎÏ¾ÑÐÀÑÐÀÐÑ¾ÐÑ½ÐÏÀÕÒ¾ÓÏ¼ÐÐ¾ÒÔ¾ÓÐ»ÒÑÁÑÒÀÑÒÁÒÐ¾ÐÐ½ÏÒ¼ÒÓ½ÒÐÁÒÐÀÓÐ¾ÒÑÀÓÐ¿ÒÑÁÔÎÂÒÐÀÒÏ¿ÒÓ¾ÒÒÁÑÏ¾ÒÓÁÑÑ¿ÓÎÁÔÒ¿ÒÐ¿ÐÒ¿ÒÐ¾ÑÏ¾ÐÐ¾ÐÏ»ÐÊ¼ÌÎ¼ÐÎ¾ÒÍÀÐÏ¼ÐÐ»ÎÐ»ÎÐ¾ÐÍ¼ÏÎ»ÎÎ¾ÏÌ¾ÐÌ¼ÌÍ¾ÒÌ»ÑÊÁÐÐ½ÎÏ¼ÌÌ¾ÐÐ¿ÒÍ»ÏÌ½ÊÎ¾ÍÌ»ÎÌ»ÍÎ¹ÐÌ»ÐÌ»ÎË½ÐÌ¹ÍË»ÍÊ¾ÌÌ½ÐÊ»ÍÌ¾ÎÎºÑÊ¼ÎÎ»ÒÌ½ÌÒ¾ÌÊ¿ÎÌ¼ËÍ¹ÌÊ½ÌÎ»ÎÍ¾ÌÊ¼ÎÌ¼ÎËµÌË»ÊÊ¹ÌÎ»ÌÈ·ÌÈ¹ÇË¹ÊÈ¶ÈÇ»ÈÈºËÉºÎÈ»ÌÊ·ÊË¸ÉÊºÊÊ»ÊÉ»ËÈ·ÈÊ·ÌÊµËÈ¹ÇÊ¸ÈÉ¶ÊÇ·ÊÈ·ÈÈ´ÆÆ·ÇÃ¹ÈÉµÉÇµÇÈºÈÆµÇÇµÈÁ·ÆÈµÉÇ·ÅÆ´ÊÅ¶ÊÆ·ÆÆµÈÃ·ÅÅ³ÊÅ´ÄÃ·ÉÅµÇÃ¶ÆÈ³ÆÆ³ÆÁ³ÇÃ´ÅÃ·ÅÂ³ÇÃ¶ÇÃ°ÇÂ²ÅÄ´ÇÃ³ÆÅ´ÄÂ´ÆÃ³ÇÅ³ÅÂ³ÃÁ±ÄÃ³ÈÁ²ÃÄ²ÂÃ±ÆÃ´ÄÁ²ÇÁ¯ÄÂ±ÂÁ³ÃÁ±Å½³ÄÂ±ÄÃ±ÃÁ²ÀÂ²ÂÂ³ÆÁ²ÂÀ±ÁÀ®ÈÂ³ÃÃµÁÄ³Ä¿²ÀÂ´Á¿°Â¾°Á¾´ÃÁ³ÆÀ¯Ä¿³Â¾³À¿­Á¿³Á¿­ÃÁ®À¾®Â»³Á¾¯À½­¾Á°¿¾³Á»¬Á¾­¾½°¾¿­¿¾®¿¼®Á¾®¿¼¯¿»®½½®Á¼­¿¾­Á¾¬½»¬»¾¬¿»­¼¸­¾»¬¿º¯¿¹¬»¶¬»»¬¼»ª»º®»»¬¿½­¾¹ª¾»¬½»§¼°¤²·¦»·§»»ª»·¨¼»¦¸¹©¸·¦¼º¥¼·¨º»¤»¸¦¾»¥»¸ª½¸¤ºµ¦»¾¥¹º¨»·¥¹¹§½º§»¶¦¾»§¾»©¼¸§½¹¬¼¹¥¼º©¾¸§¾º§¾º¬¾º¨¾¹ª¾»¦¾¸«½»«Á½ª½¸ª¾»§¾»¥¾º©¾»§¾»§½»©À¸¬Àº«Ã¼ª¿»¬¿¼©¿¼¨¾ºª¾¼­Â»©¾¾«»»¬Â¾«À»¬½»¨¾½¬¾»­¾¾©Á»¬À»ªÀ¼¬¿¾«Áº«Á½®¾½ªÄ¾®À¾®ÂÀ¬ÁÂ¯Ã¾®Á¾«Ä¾­ÃÁ­Ã¾­ÃÁ¯ÄÀ¬ÄÁ°Ä¾¯ÁÁ°Á¾³ÃÂ°ÄÃ²ÁÂ²ÃÀ­Å¿°ÃÂ®ÄÂ¯ÄÀ¬ÃÃ±ÆÅ²ÄÂ¯ÃÂ­ÅÃ²ÆÃ°ÄÆ°ÆÀ¬ÅÂ²ÃÃ°ÇÁ°ÄÆ±ÈÃ°ÆÅµÆÁ´ÇÂ³ÇÄ²ÈÅ³ÈÅ±ÈÃ±ÇÇ²ÆÅ´ÅÄ²ÇÄ³ÈÄ³ÈÆ³ÊÇ³ÈÃ³ÅÆ³ÆÇ²ÈÃ²ÈÆ³ÆÆµÉÃ®ÈÆ´ÊÇ³ÊÆµÇÆ´ÇÅ³ÈÄµÈÆ·ÉÇ³ÈÅ±ÊÄµÈÈ³ËÆµÇÅµÈÆ³ÈÆ²ÉÇ¶ÌÈµÎÈµÈÆµÊÇµÈÇ¶ÊÈ²ÈÉ³ÇÈ³ËÇ¶ÊÈ·ÈÈ¹ËÊµÊÆ¸ÈÈ¶ÊÆµÊÇ·ÉÈ²ÊÈ·ÊÇµËÉ³ÉÈ¶ÌÈ¸ËÈ·ÌÈ¶ÌÈµÉÌ¶ÌÊ·ÈÉµÌÆ¶ÌÇ³ÊÇµËÃ·ÍÇ·ÉÉµÍÆ·ÊÊ·ÐÊ¸ÌÊ·ÏÌ·ÌÎ¸ÊÈ³ÌÌ·ÎÌ·ÏÊ¹ÎÊ·ÌËºÌÉºËËºÐÌ·ÏÊ¸ÌÊ·ÍÉ¸ÎÈ·ÌÉµÎÌ½ÎÊ½ÌÉ·ËË·ÏÈ·ÌË·ÌÌºÊÌ¹ÌÈºÌÊ·ÎÌ·ËÊ»ÌÊ¸ÌÌ¸ÎÎ»ÌÊ¸ÎÌ¸ÏÊµÊÌ¹ÍÌ¸ÎÌºÏÌ»ÍË·ÎË¹ÌÌ·ÍÌ»ÐÌ»ÌË»ÐÎ¹ËÍºÎÊºÎÌºÒÎ¼ÌÌ»ÎÏ¾ÎÎ¾ÏÒ¸ÌÌ»ÎÌ»ÎÍºÎÌ¸ÏÎ»ÏÌ¼ÏÎ½ÎÎ·ÏÌ»ÐÎ»ÎÎºÑÎ¹ÎÐ½ÏÏ½ÑÎ¸ÍÌ¹ÎÎºÒÍ»ÎÌºÐÑ¾ÏÌ·ÌÎºÍÊ¼ÎÍ´ÈË·ÄÁ¬Á¬³¦t|infl_{kYwn[rq`|rgi|ligxdqYr[zt_ztY|tfunx~z~|rkufr`~d|dw[~|_{n[wq[zt]{u]zqbzt]znSzn[wn]zk_xwWxo]zl[rkWtfQqrQugQogUqgQugQqbUngQrlUoo_wo_z`w{gx`{z[xq[urUrn]xoYww_t|`ur`wr]wx_xz_zz[wq]uq[zq]utYxqWro]tkUwf[tkWruYto]qtYtr`ztYwt[zrY|q[wo_xwflnnfq~kxi|wYi[ztUznY|kY|qb|zf~dw]~t`zb`|i|no|dxdx_xtf~{fdi~knut{`rYzkStfYzxizkrzxld|qbzn[wkYwq[tkYrdOn`Qq_OkSQi[QdQIdWId]Qd]Ml]QdYQk`OnfUtod|©¤¾²³ÈµÁÎ·ÆÎ»ÌÍ¾ÌÐ¸ËÍ¹ÍÏ»ÐÐ»ÎÎºÏÌ¾ÌÏ½ÐÐ»ÏÎ¼ËÎºÍÊ¶ÊÌ»ÏÎºÎÌ¹ÎÌºÎÎ½ÑÌ¹ÎËºÌË»ÍÐ»ÎÊºËÌ»ÎÌ¶ÎÌ·ÍË¼ÏÌ¹ÍË½ÌÍ½ÑÐ½ÌÎ·ÎÌÀÌÏ»ÎË»ËË¼ÌÍ¸ÊÈ´ÌÊ¸ÌË»ËË·ÈÊ¹ÌÊ¹ÊÊ¸ÍÉ¸ÉÊ·ËÌ¶ÌÊ¹ËÊºÊÉ¸ÊÈ¸ÊÆ·ÈÊµÊÉ¸ÈÆºÌÊ¹ÊÈ·ÈÈ·ÌÊ¹ÎÈ´ÌÆ¹ÊÈ¸ÉËµÈÇ¹ÈÊ³ÊÈµÊÈµÊÈ¸ÈÈ¶ËÆ·ÈÈ·ÈÇ¸ÇÆµÈÉ¸ÇÆ¶ÌÌ·ÊÉºÌÌ¶ÌÈ³ÊÇ»ÊÆ»ÊÊ¶ÈÇ·ÉÉ¶ÆÆµÊË»ÊÈ¶ËÉµÊÆ·ÇÇ¸ÇÆ³ÇÆ·ÈÆ²ÆÈ¶ÈÆ³ÆÆ´ÈÈµÈÅ³ÈÆµÇÃµÄÃ²ÄÃ³ÄÆ³ÈÃ´ÆÃ³ÅÄ°ÇÉ¶ÆÆ´ÈÅ°ÅÆ³ÈÁ³ÆÃ³ÄÁ±ÅÃ°ÄÃ²ÅÁ°ÁÁ±ÁÄ²Ä¾±ÃÁ°ÁÃ°ÄÁ±ÂÁ²ÃÅ´ÆÀ­ÂÁ²Ä¿®ÁÃ²ÆÀ¬ÄÃ³Ä¿¯ÄÀ¯ÃÁ²ÁÁ­ÂÀ±Ã½±ÁÁ¬À¾¬ÃÁ°Ã½´ÂÁ«ÁÁ¯Æ½²¾Á®Â½¯¿Á°À¾®ÀÁ¬À¾®Á¿«Á¾¯¾À°Á¾¬½½®ÁÀ®À¾®Â»¬¾¾®¾À­Á¼­¾¹«½»®Á¾¬¿¼®¾º¬Á¾«¾¹­¾¾­¼¼°Á½«¾¿°¿½®½¿°¾¾°Á¾¬¾º­¿¾®¼¼¬¾º¬¾º¯¾»¬»¼¯¾¼¬¼½«¾»©»»ª½»¬»¼«¾º«º»®¾¹ª»»¬½º«¼»©¼¸«¹¸¬¾»ª½»§·¸¥»¸¨½·«»º­º¹¦¹µ§»¶¨·º¨¼³¥¹¹©»¶¦»´¦¸³§¸¹©¹¶¤·¶§»µ¥·´§µ¶§¹¸§··§ºµ£·±§¹·¥¹³«·À¬¾¾¬Á¿®»¾¬Á½®¾¾«¾¾ªÀ¾­Á¼¬¾¼¬Â¼¬Á¿­ÀÀ­¿Á­Á½«Á¼¬Â½¬ÀÀ«Á½­Â»§¿½¬¿¼®ÂÀ¬ÁÁ¬À½®À»¬Â»¬¿½¬¿À­Ã¿®¾½«¿½°ÅÁ±Â¾°ÁÀ¯ÆÁ®ÁÀ°Æ¿­Ã¿¬Á¾­ÁÀ®Â¿¬Ä¿«ÃÀ²Ã¿¯ÆÁ­ÄÀ±ÃÀ­ÆÀ°Å¿´ÃÁ¯Ã¾¬ÃÁ²Â¿²ÆÁ®ÅÃ°ÃÁ¯ÃÃ±ÁÂ¯ÅÃ³ÅÁ²ÇÁ´ÅÂ¯ÃÁ°È¿®ÅÂ°ÄÃ±ÈÀ²ÅÆ¶ÃÆ³ÇÃ³ÆÃ³ÈÃ°ÇÃ´ÆÆ³ÆÅ±ÊÂ³ÈÅ³ÊÆ³ÈÅ³ÇÃµÉÆ´ÉÆ³ÉÃ¶ÃÉ¹ÈÅ´ÊÅ³ÆÄ³ÇÈ¶ÉÅ¸ÌÈ·ÊÈ³ÌÆ´ÄÆ·ÌÊ·ÊÈµÉÈ·ÊÉ³ÍÈ¶ÊÆ¶ÊÄºÈÊºÌÉ¸ÍÉ·ËÊ¶ÈÈµÌÈ¸ÌËµÈÆ·ÊÉ¹ÍË·ÉÊ¸ÉÉºÎÍ¹ÎÆ¹ËËµËÊ·ÌÌ·ÍÉ·ÌÌ´ÊË¹ÌÌ»ÌÉ¹ËÈ¶ÍÉ·ÌÌ¶ÏÉµÊËºÎË¹ÍÊ·ÍÈ·ËÎºÍÊ»ÎË»ËÌºÐË·ÌÌºÊÎ»ÐË·ÎÊ¸ÏÍ¹ÐÈ¹ÎÈ¹ÌÌ¼ÌÊµÌÌ»ÏË¹ÎÍ»ÍÍ¼ÎÍ¹ÎÍ»ÐÐ·ÑÌºÐÎ¾ÒÌ»ÒË½ÍÎ¹ÏÌ»ÐÌºÎÐ¼ÐÐ¶ÐÍ»ÐÉ¹ÐÍ¸ÒÍ·ÏÌ»ÏÎºÐÎºÑÌÀÐÌ¹ÑÎ¹ÐÈ·ÐÍºÏÏ¿ÒÈ¼ÐÎ¼ÕÍ¸ÒÏ¼ÓÍ»ÒÏ¼ÓÌ¸ÐÑÁÓÌ¼ÒÌ¾ÒÎ¿ÒÐ½ÓÊ¾ÐÌ¹ÐÐ»ÒÌ¾ÒÎºÐÌ½ÐÐ¼ÐÐ½ÒÏ»ÒÌ¿ÏÐ¿ÐÐ¾ÓÎºÒÌ»ÑÎ¼ÒÑ»ÒÎ¿ÏÐ»ÒÌ¹ÐÌ½ÒÐ»ÒÐ¾ÑÎ½ÒÐ¿ÐÎ¼ÒÏ½ÒÐ¾ÒÏ¾ÕÐ»ÑÐ¾ÓÎ½ÕÑ¾ÓÐ½ÓÏ¼ÖÒÀÕÏÀØÎ»ÕÐ»ÒÕÀÕÔ¿ÕÒ¼ÐÐ¿ÓÕ¾ÕÐÀÕÒ¿ÐÒ¾ÓÐ½ÕÓ¾ÕÐ»ÕÓ½ÓÒÁÒÒÁÖÒ¾ÖÐÁÖÒ¾ÕÕÂÖÏ¾ÒÑ¿ÖÓÁÕÓÁÓÐ¾ÒÓ¿ÔÓÂÖÒ¿ÖÖ¾ÕÏ»ÕÑÂÒÏ»ÐÈ·ÍÆ¹Ì»«Ã¬³±«¡rodr_tdzd|orwzrxol~fxdwgzk~ld~kk~l~glixduf~kziif|ilbxfwdu_t_od{kg~fx_t`q]q`xo_zo]wt[zo[wwb{x`wg|zkiono{gxb~f|bgoo~io~dzgr`xd|wdzzbxg~x_u_zw`~x`|tdwwf~nik~ldf{lnzo~nzxr{oo_r`wi~d|b{f|lnoqx²{{ulggkzd~ngwbk|g|irdtb{wbw_~kqntqnn|izf{g~xi~xd|{[{wbk`ziYx`[t`YrdQod]qfYrdSof[oi[tl[{n`|wg¯¦«Á²»Î»ÅÎ¾ÊÒÃÍÕ¿ÓÓÀÒÐÀÒÒ¿ÓÔÃÓÔÂÒÒÁÕÑ¿ÓÒ¿ÒÒÀÒÓ¼ÕÒ¿ÓÒÁÓÒ¾ÒÏÁÒÐ¾ÒÒÃÐÐÃÑÐ½ÒÒ»ÒÍ¾ÐÒÀÐÐÁÒÏ¾ÑÎÂÕÔ¾ÕÐ¿ÓÒÁÑÐ½ÐÒ¾ÑÓ¿ÓÐ»ÐÎ»ÎÒÁÒÐ¾ÑÏ¼ÒÐÀÏÒÁÓÏ½ÐÎ¾ÐÎ¾ÑÐ¾ÓÌ¿ÏÐ¼ÎÍ»ÏË»ÑÐ½ÑÎ»ÎÍºÐÎ¾ÐÑ»ÐÌ¾ÎÍ¾ÐÎ¼ÎÎºÎÌ¾ÒÎºÓÍ¼ÏÎ¼ÏË½ÌÎ¹ÌÎ»ÌÎ¹ÎÎ»ÒÌ»ÑÍ¾ÐÌ»ÎÍ¼ÍÐ½ÒÐ¹ÏÌ½ËË·ÍÎ¸ÎÍ¿ÍÎ¿ÒÐ»ÐË¾ÎÐ»ÐÌ»ÎË¿ÐÌ¼ÏÌ¾ÒÎºÐÌ¼ÍÌ¸ÍÐ»ÐÌ»ÊÍ¾ÎÌ¸ÎÊ»ÌÊ¹ËÌ¶ÎÆºÍÌ¼ÌÌ¸ÍÊºËÈ¹ÊÉ¹ÇÉ¹ËÉ¶ÉÊ¶ÈÌ¹ÌÈºÈÌ¹ÍÊ¸ÊÉ¹ÊÊ»ÊÇ¶ÍÆºÆÉ·ÉÃ¸ÈÆ»ÌÈ¶ÊÇ´ÈÈ»ÈÇ¶ÇÆ·ÊÉ·ÊÆ´ÊÆµÇÅ¸ÆÈ·ÈÇ¶ÈÃ´ÇÆ¶ÆÆ¶ÉÅ³ÈÆ·ÆÆ´ÈÆ³ÉÅµÆÆ³ÅÂµÈÅ´ÆÃ¶ÅÅ´ÆÄ¶ÇÃ¶ÈÅµÈÃ³ÆÁµÃÃ¶ÆÃ¶ÄÅ³ÄÀ³ÇÃ°ÂÃ³ÆÂ°ÆÃµÄÃ³ÇÁ²ÅÁ±ÅÄ²ÃÃ³ÄÁ²ÆÄ³ÂÁ°ÆÂ³ÆÁµÄ¿²ÂÀ°ÃÃ´ÁÁ¯Æ¿³Ã¿³ÁÁ³ÂÃ³Æ¿³ÂÁ³ÄÁµÂÁ°ÂÀ´ÆÃ¬ÃÁ°Á½°ÄÂ­Ã¾°ÂÁ³ÃÁ´ÂÁ²ÂÁ°Á¿±Å¿²ÁÀ°Á½®Ä¾¯À¾°¿»¯¿À®Â½³ÀÁ°Á»°Â¾²¿À°Á¿²À¾¯Á¼¬¾¾­¾»°½¼¯¿¾¬¿»«À»­½»¬¾¹¬¾»®¼»¬¿»¬¾º¬¸¼ª¾»¬½·¬À»«½¼®¾¸®¾»«½¸©¾»ª½·¬»»§¿®¤±·¤¶·£»¸¦·¸ª½µ§»¸¨¼¶§¼·¦ºº©»¸¥¹º©»»ª»¼«»¸ª¿·¨»¸§¾¶¨½¶§»·­»¸©½¼¨ºº©½·©½¹«»»¥¾»§¾»¦»½«½»¨¾º©¼º«¾º¦¾»¬¾»«¿ºª»º¨¾·©¾º©¾¹«À¼¦¾»¬»½©À½«½½®½¹¬¾¼¬¿¼¬¾¾ªÀºª¿¹¬¾¼¬À»«¿»­¾¾¬À¾©À½¬¾»¬¾¾«Á¾¯ÁÁ¬Ã½¯Á½«Á¹¯¾¾¬Ã½­Á»¬Á¿¯Ã¾«Á¾°Á½®Á¿¬ÃÁ¯¾¾®Ã¾±ÀÀ¯À¾³À¾­Ã¿®Â¿®ÃÃ®ÄÁ°ÃÀ²ÂÃ³ÃÁ³ÆÂ²ÅÁ°ÅÁ®Ã¾²ÅÁ°ÆÁ®ÆÀ³ÄÄ²ÄÁ®ÃÁ²ÄÂ²ÄÁ³ÆÂ²ÆÃ³ÃÃ²ÈÃ°ÆÁ²ÇÃ±ÇÃ¯ÆÃ³ÄÂµÈÆ°ÃÄ¶ÆÅµÅÅ¸ÅÃµÅÁ´ÇÃ°ÇÃ²ÆÇ³ÇÅ´ÈÅ·ÇÆ²ÉÅ³ÊÄ·ÇÄ³ÊÁ³ÇÄµÈÅ·ÉÅ¶ÊÄ²ÅÇ¸ÃÈ³ÅÂ³ÆÆ²ÆÆ³ÊÆµÈÈµÊÇ´ÈÇ·ÇÈµÇÅ·ÈÇ¶ÈÆ·ÊÊ´ÉÈ·ÈÇ¹ÊÉ·ÇÊ´ÌÆ³ÈÆ·ÇÇ¶ÌÈ´ÌÇµÊÈ¶ÈÇ·ÈÈ·ÆÊ¸ÉÉ»ÎÆ·ÊÊ¸ËÉµÍÈ¸ÈÉ·ÌÊ³ÌÇ·ÊÆµÈÊ·ÌÊ¸ÊÇ·ËÈ´ÊÅµÎÊµÌË¶ÍÊ·ÊÆ·ÌÆ³ÊÇµÍÈ´ÊÇµËÊºÎÊºÌÉ³ËÈµÍÊºÎÉ¸ÌÉ·ÍË¸ÊÎ¾ÏÇ·ÎÈ¹ÌËºÎÌ¸ÍÈ¸ÎÈµÎÊ¸ÍÊ¸ÎÉ·ÎÈ¶ÉÈµÎÍ¹ÎÊ¹ËÆ¸ÍÊ¸ÌË·ÎÌ¶ÍË¹ÌÉ¹ÏÌ·ÎÌºÌËµÊÈµËË¹ÎÎ¹ÌÊ¸ÎË·ÌÎ»ÎË·ÎÊ½ÎÊ¸ÒÉ·ÎËºÐÌ¶ÎËºÎÎ»ÎÌ¹ÎÍºÎÎºÌÌ¸ÏÌ¾ÎÊ¹ÌË¼ÐÌ»ÌÏ»ÎÎ»ÐÏ¾ÐÌ»ÔÎ»ÏÎ¹ÓÌ»ÌÌ¼ÌÎºÒË·ÎÏ¼ÍÑ»ÎÌºÎÉ»ÍÍ¼ÎÌ»ÎËºÐÐ¾ÐÍ»ÏÌ¿ÏÐ»ÐÎ¹ÍÎºÍÌ»ÐÊ¸ÊÊ¶ÌÅ³È¾®Ãµ§½±¤³¬²´¦xkiYk`|{f~{n|lkr{zuzq|onlqrlkgnkktkxbzinrqif|fnfd{d~b~x_|`~xg|g~{`u[{qYtqUxq]ug]wkYtqYtqWtn_tq]zt_~{n|gqogzg|d||`|wb{|d{d|b|d|xg_t_|t_zw[zw_zu`zw[|qYxobww]{t]xq_tx_z|f~~d|gfwb|`izfo`q]zk{x~ir_wd~wkgzb|b~digtq{quiz_rgu]ztd|qYznU{lb{od~wb{fz|i|w_~nYzq_xq_zrf~|dgi|nnbk`zw`xu]~o]xu`zx`||bztgzoYz_QoYQiYOfYSd_[k`Og]Of[UibWndYogUwgb§¡ªÇ¶»Ë¹ÃÌ»ËÎ½ÍÏ»ÊÌºÎÎ¾ÐÎ¾ÎÊºÊÎ»ÎÌ¼ÒÎ½ÐÎ»ÎÍ¹ÏÎ¾ÌÏ»ÎÌ»ÎÌ¸ÎÌ»ÎÎ¿ÎÌ¾ÌË»ÍÎ½ÌÎ¹ÌË»ÊÎºÎÊ¸ÌÍ»ÎÍ»ÏÎ»ÌÌ·ÎÊºÍÈµÍÎºÌÍºÌÎºÌÊºÌÊ»ËÌ¼ÍÊºÍË»ÊÌ¾ÎÈ·ÊÊ»ËÍ·ÊÊ·ÊÌºÌÆ¶ÊÇ¸ÈËºÊË·ÌË¹ÍÈ¸ÈÊ·ÊÌ¶ÌÇ¸ÈÉ·ËÊµÊÈ¹ÉÇ¸ËÌ·ÊÈ·ÈË¸ÊÈ·ÍÆ·ÉÇ¸ÈÈ¸ÉÆ¶ÊÈ·ËÈ·ÌË¹ÊÈ¹ÊÈ¸ÊÈµÌÇ¸ÇÇ¹ËÈ¸ÍËºÌÊ»ÌÊ¹ÊÊºÇÈ·ËÌºÈÈ·ÈÆ¹ÊÇ·ÈÆµÇÆ·ÆÊ·ÉÆ¸ÊÉ·ÈÈ¸ÉÆ¶ÆÇ¸ÈÇ·ÉÇ´ÄÄ·ÆÆ³ÄÆ´ÉÇ¶ÉÄ´ÆÆ³ÇÆ·ÅÉµÇÅ´ÆÃ³ÄÃ³ÈÂµÆÆµÆÃµÆÆ³ÆÃ³ÈÁ±ÅÄ³ÄÃ·ÄÃµÃÄ±ÄÄ·ÅÁ³ÃÀ±ÈÃ´ÄÁ²ÃÁ±Ä¿²ÇÂ²ÆÂ³ÃÂ³ÃÀ³ÄÂ±Á¾²ÁÃ®À¿°ÁÄ¯Ã½±ÀÁ´ÂÀ°ÁÁ®ÃÃ±ÆÀ­Â¼±¾À¯ÁÁ²Ã¾°ÁÁ°ÃÁ¯ÂÀ¯ÁÀ²ÀÀ¯Á»¯Á½¯ÂÁ¬ÁÁ²À¾­À¿±¿¿®Á¿¯¿¾®À»¬¾»¬¾À°¿¾«Á¹¬¿À°¾¾®Â½­½¾®¾Á¯Â¼¬¾»±½¾©¿¾­À¸¬¾¹¯¿ºª¿¼®¾¿¬¾»©»»«À½°Á¾«»¹®¾½®¿»®¾º¬¾»«¼ºª½¼¬¼½¬»¼®¾»¬»»®½»«¿¸«¼·«½¸«½¹ª¼·§»·«¼»©½¹¬¼¹¬»¸¦¸¸«»·«»¸¦»·©¸·ª·¸§»·©¸³¨¶¸§»µ¥º·«·º¥º³¥»³ª¶·¤·³¨º¸§¹·¦º¶§¸³©¸·«¸´¨¹½«¿½¬¿¼¬¾¹®Á½©ÁÁ¬Á¼¬Á¾¨Á»¬À½¬ÁÀ¬Áº¬Â¾¬À¾®Á»ªÁ»©Á¿­¿»­¿»®Àº¬ÂÀ®Á¿±Å½¯Ä¼­ÄÀ­ÃÀ¯Â¾ªÁ¾°¾¾¯Æ¿¬Â¼±Á¿®ÃÁ¬Å½®Ã¾®ÀÀ­Ã¾ªÁ¼³Ã¾¬Å¿­È¿±ÅÁ«Æ¼­Á¾¯ÄÀ¯ÂÁ°Á¾¯ÆÁ­ÄÀ®ÃÁ®Á¿­ÆÀ®ÅÀ³ÆÂ°Æ¿¯Å¿²ÅÁ³ÈÂ¯È¿±ÅÃ³ÅÁ³ÈÃ®ÆÁ³ÇÃ®ÆÁ¯ÉÃ¯ÃÁ´ÅÁ±ÇÀ³ÆÆ³ÆÂ¯ÈÅ±ÈÅ³ÊÃ³ÊÃ¶ÆÂ´ÈÆ®ÆÆ°ÆÆ¶ÇÆ³ÈÃ±ÈÇ³ÌÂ±ÊÅ³ÆÈ¶ÊÃ°ËÆ³ÅÃ³ÊÆ·ÌÅ·ÊÅ¶ÈÄ¶ÊÇ³ÉÃ»ÉÇ³ÇÆ·ÆÆ´ÌËºÊÈµÈÆ³ÌÆµÉÈµÌÆ¶ËÈ»ÊÅ·ÊÊµËÇ·ÈÊ·ÌÇ¹ÍÉ¶ËÈ·ÌÈ¶ÌË»ËÉºÊË·ÊÈ¸ÌÇ¶ËÉ·ÌÅ·ÍÊ·ÐÉ·ÊÉ·ËÊ¹ÌÉ·ÌÉ¶ÌÊ¹ÉÊ¶ÍË¸ÍÊ¸ÎÈ¸ÌÌ»ÌÈºÍÏµÍÇ»ÏÊ¼ËÆ¹ÒÊ¹ÎÈ¼ÍÊ¶ÎÉ¼ÏÊ¼ÓÍ»ÍÌ»ÎÊ»ÊÊºÌÊ¸ÍÍ¹ÐÌ¹ÏË¼ÐÌ¹ÍÉºÍËºÑÍ»ÎÍ¹ÔÍ·ÐÌ»ÎÐ»ÐÍ¼ÒË·ÎÌ¼ÒÍ¸ÍÎ¾ÓË»ÌÊ¸ÎÍ¹ÏÎ¾ÐË¼ÏÎ»ÏÌ»ÐÍ»ÑË»ÏÊ»ÎË»ÒÎ»ÐË¹ÎÊ»ÑËºÐÌ¾ÒË½ÑÐ»ÑÌ¾ÐÎ¿ÒÎ»ÒÎ¹ÏÎ¾ÒÎ¾ÐË»ÎÎ¹ÐÑ»ÒÎ½ÒÒ¾ÑÌ¾ÐÍ½ÐÐ»ÓÒ¿ÓÎ»ÑÍ¼ÔÍ»ÔÎ¼ÑÌ¹ÒÎ½ÑÓ»ÔÌ¿ÒÐ¿ÐÏ¹ÐÏ»ÑÎ¾ÑÐ¹ÐÎ¾ÐÏ¾ÑÌºÓÎ½ÐÒÀÓÐ¾ÒÓ¾ÓÌ¾ÐÑºÕÑ»ÑÒÁÓÏÁÔÒ»ÕÐ¿ÐÒ»ÓÍÀÔÐ¾ÒÑ¼ÐÒ¼ÕÐÁÒÐÁÖÕÁÖÑÀÓÐÀÓÓ¾ÓÒ¿ÕÐÁÒÒ¼ÓÓ»ÔÐÁÓÒ»ÕÐ¾ÓÓÁÒÒ¿ÖÔ¾ÓÑ¼ÕÓÀÓÒÂÔÑ¿ÐÓÁÓÓ¾ÒÑ¾ÓÒ¿ÓÒ½×Ì¿ÑÏ¸ÐÊ´ÈÃ­Ãµ¤»¨± ¨xiubzo{{wow| wuuuqzz|ux¤{¤|~uttrnrtrrrnoofi`|_~rb~{`{_{ub~zi{{iizw~||rqknnwolqkk|gbf|i{ifg~ib{b|b{inlnoonllkkxx|x{tronnrq||w|oonnkzfz_q_~o`ufw`ork~dxi~|_{b~xi|~lttul{izfugxiikqquzb~k]x`WzdYlf]zdWn`SnbWtk_uk_unbwkbxd·ª±É·ÃÐ¾ÌÎÁÏÒ¼ÑÒ¿ÕÒ¿ÒÓÁÓÒÀÓÓÁÕÒ½ÓÏ¿ÓÒÀÓÑÁ×ÒÀÑÐÁÕÒÀÓÓ¿ÒÐ¿ÑÔ¾ÐÐ¾ÒÑÁÕÐ¿ÒÐÀÒÎÁÓÑÀÕÒ¾ÒÐ¼ÓÓ¿ÑÑÁÒÐ¾ÒÎ¿ÒÒ¾ÒÐÁÎÒÁÒÓ¾ÒÒÁÑÎ¿ÑÏ¼ÑÑ¼ÐÎÂÒÐ¾ÒÎ¼ÎÐ»ÌÏ»ÔÎ¾ÐÐ½ÑÎ½ÒÎ»ÐÎ¾ÐÎ¾ÒÌ¼ÏÏ½ÐÎ¿ÐÌ¼ÐÍ¼ÌÏ»ÒÌºÎÌ½ÐË»ÒÌ¼ÒÎ»ÐÎÀÏÌ¼ÍÌ¼ÍË»ÎÉºËÍ¶ÍÌ¼ÐËºÑÈºËÊ»ÍÌ¸ÍË»ÍÏºÍÏ»ÐÐ¿ÐÐÀÐÍ¼ÏÎ¾ÐÏ¾ÐÌ»ÓÏ¼ÒË¼ÏÍ»ÎÍ»ÌÊºÎÊ»ÎÎ¼ÊË½ÎÍ¾ÎÌ»ÏË¾ÌÍ»ÎÊ¸ÏÈºÌË»ÎÈºÌÇ·ÌÌ¹ÊÈ¹ÌÌ·ÌÈ»ÉÈ¶ÍÉºÎÈ¶ÊÇ¼ÌÈµÌÉ¹ÉÉ·ÊÉ¹ËÆ·ÊË·ÊÇ¶ÈÈ¶ÇÊ·ÌÈ¸ÈÇµÊÆ´ÈÆ·ÊÂ·ÉÆ·ÇÆµÊÆ´ÅÈ·ÈÇ·ÊÄ³ÈÄµÇÃ¶ÇÅ·ÊÆ´ÈÂ´ÇÄ´ÇÂ´ÆÃµÇÄ±ÇÂ´ÆÇ·ÆÄ³ÆÂµÆÃ³ÈÁ´ÈÁ¶ÆÂ²ÆÅµÈÃ¶ÅÃ¶ÃÅ±ÅÅ³ÅÃ¶ÄÁ³ÃÃ´ÅÆ³ÃÄ³ÆÁ³ÆÁ´ÆÁ³ÇÁ²ÁÃ±ÆÁµÂÃ°ÆÃ°ÄÃ°ÀÀ¯ÂÂ³Ç¿³ÃÁ³ÄÁ²À¿¯ÂÁ±ÅÀ±ÂÁ°ÄÁ²ÂÁ´ÂÂ±ÂÁ±ÄÀ®Å¿¯Ã¿±ÃÂ®Á¿®ÁÁ±Â¿¯Â½±À¼¯Â¿±Á¾°Á½°ÁÁ²Ã¼±Áº±¿»­Ã¾°Â¼±À¾­Â»¯À¾¯À¾®Áº¬¿¸®¿¾¯¾º¬¾»®À»³Á»®Áº¬½¼¬¿¾¬¿¹¬»»®¾¿«À¹®½½¬¾»©½·¬¹»¬¼½«¾»®¿¹¯¾»¬À»®¼¸«½¸ª¼³¨´´£¶¸¤¹¹©¾¹¬º¸§»¸§¾¹ª»·¬»¶¦»·¨½º«»»©¾·«º¸¨»»¨¾¸¬¹·«»¸§¼¸¨½º«»¶§»¹©¼»©»·©½ºª¾¸©»»©¿»¦¼·«¼¶ª¿¼«¾¹«¾»¨½¹«¾º§½½«¿¼ªÀ¹«º»©½½©Ã»¬¿»ªÁ¼¬À»¬¿¸ªÁ¸«¼»«Áº«Âºª¾¼¬À½«¾»«Á»®¾»ªÁ½ªÀ½¬Á¼«¾»®Æ½¬Â¼­Ã¿­¿½¬Â¾¯Ã¾°Â¾¬Á¾¬¾¾ªÁ¾®Ä¾«¿½°Ã¿±ÁÀ¯ÃÀ±Â¾°ÄÁ°Æ¾¬ÀÂ¯ÀÁ²ÄÁ°ÄÁ®ÄÁ®Ä¿±ÄÁ°Ã¾³ÄÂ°ÄÀ¯ÂÁ³ÃÃ°ÆÁ´ÆÂ®ÇÁ¯ÅÂ±ÄÄ²ÄÂ³ÄÂ´ÆÀ²ÄÄ°ÆÃ³ÅÃµÆÃ°ÄÂ³ÆÅ°ÆÆ³ÆÂµÆÆ´ÄÃ®ÇÃµÇÄ¶ÇÆ´ÇÃ³ÈÆ´ÆÅ²ÈÃ´ÈÆ³ÊÆ³ÇÄ³ÈÄ³ÅÅ³ÉÃ´ÇÂµÈÃ°ÈÃ¶ÈÆµÉÆ·ÊÅ²ÈÄ¶ÈÈ³ÇÃ´ÇÄ·ÆÇ²ÉÆ´ÈÆ²ÈÇ³ÇÆ´ÊÈ·ÈÈ·ÌÆ²ÉÆ³ÇÇ´ÊÈ¸ÊÇ¶ÉÈµÉÉ·ÈÆ·ÊÅ·ÈÄµÉÄ·ÊÈ¶ÌÈµÍÈ·ÍÊµÊÆ·ÊÌ·ÌÈ·ÊÈ¶ÊÈ¸ÊÆµÉÈµÎË¹ÎÆµÊÆµÈÂ¶ÊÉ´ÇÈ¹ÍÉ³ÈÊºÌÊ·ÊÉ·ÊÈ²ÉÆ·ÈÇ·ÌÇ¶ÉÈ³ÊÊ¹ËÌ·ÌÈ¶ÍÊµÌÈ·ËÈ·ÎËµÌÈ¸ÌÈ¸ÌÊºÌÊ·ÌÊ·ÐÈ¹ÌËµÍÍ¹ÌÊ¸ËÊ¸ÒÎ»ÌÉ½ÎË¸ÌÉºÌÍ»ÌÎ¹ÐÊ¶ÍË»ÏÊ»ÌÉ¶ÊÌ·ÌÉ»ÌË·ÎÊ¹ÍÎºÎË¹ÍÊ»ÌËºÍË¸ÒÈ¹ËÌ¹ËÊ»ÌÌ¹ÍÍ¹ÏÌ¶ÏÊ·ÍÌ·ÐÌ·ÌÊ¼ÎÎ»ÎÌ»ÏË»ÏÎºÎÎ·ÎÊ¸ÎÎ»ÎÍ»ÏÌ½ÑÎ»ÑÊ¼ÏÎ¹ÑÌ¾ÐÌ¸ÎÎ¼ÐÊºÎÏ»ÐÍ»ÐÌ¹ÎÎ»ÐÎ»ÏÎ»ÌÐ½ÐÎ»ÒÑ¾ÎÎ»ÎÎ»ÏÎ»ÏÌ¿ÏÍ¼ÐÎºÌÌ¾ÏÍ·ÎÍ»ÌÌ»ÊÆ´Çµ§À¬qwgn`|td|n|towkrt~|x£¢{rqrqxqux|lotql|noklgnw||zqn{gzdzbztY|oYwq_trY{xbx|`{{lzwu~zztnktxwtqng|df||`{wb|uf{x_|zgx`{|]|w]zzd{~`|fkkwrllowuwx{~ttnk~gqll|otxztqxr~fw`w`u_zwd|w[zl`|w_wq`{z_{u]xu]wx]zwbzzf~f~|f~r|qgn{g~n`{t]~x`|dxt~i|g|`Yr`Uo`QkbUk`Qi]QnYQn`Wk`Ql_UndUtn[xzo ´¦¯Ä³¾Í·ÆÎ»ÊÎ¾ÎÐ½ÌÐ»ÐÐ»ÌÎ»ÌÐ»ÎÏºÎÌºÐÎ¹ÎÌ»ÐÎºÌË¹ÏÊºÏÌºÍÍ¼ÌË½ÎÊ·ÐË»ÏÎ½ÑÎ»ÍÌ¼ÌÎºÎÊºÉÎ»ÌÊ½ÎÎ»ÎÊºÎÌ»ÎÍºËÎ¾ÎÌºÐÎ¼ÌÊ¼ÌÌ¼ÏÌ»ËÊ¶ËÊ¸ÌÊ·ÌÉ½ÊÍ¸ÌÌ·ÌÉ¸ÍÌ·ÊÊ¶ÊÊ·ËÎ½ÊÊ»ÌË·ËÈ¸ÌÉ¸ÊÊ·ËÈ»ÈË¹ÌËµÌÊ·ÉËµÊÊ¸ÎÈ»ÉÈ¶ÌÉ»ÈÆ·ÉÈ·ÌÊ¸ÈÈµÊÆ¶ÇÈµÈÊ·ÊÅ·ÈÈµËÌ¸ÈË¼ÊÈ¹ÌÊ¸ÊÌ»ÌÊ¼ËË·ËÌ½ËÊ»ÍÈ¶ÌÊ¹ÌÈ·ÈÈ·ÊÆ¸ÉÊ´ÈÈ¸ÊÈ»ÉÈ¶ÊÆ·ÌÄµÈÆºÉÇ¶ÈÆ·ÁÅµÈÈ¸ÈÆ·ÆÈ¶ÅÇµÉÄ´ÇÄµÆÄ´ÆÄ²ÄÇ²ÆÇµÆÇ³ÆÃ³ÅÃ´ÄÄ²ÇÁ²ÃÄ±ÆÃµÆÁ³ÄÃ¶ÅÃ°ÄÅ±ÆÃ³ÆÁ²ÂÀ²ÅÁ³ÆÅ±Ã½³ÄÁ³ÃÁ²ÆÁ²ÃÃ°ÁÁ±ÃÁ³ÃÁ³ÅÂ±Ã¿°Â¾¯¿Á²Ä½°Á¿²ÃÁ²Æ¾±ÀÀ¬Á¾°ÁÀ±ÂÁ³ÁÁ­ÁÀ®Á¿²Â¿®Á½­Á¾±¾»¯Á¿®Á¾®À»°¾¿°Ã¿­¼¾®Á½°¾¾°Á¹­¼½®¾»ª¿¾®Á¾®À¼­À¹°Á¾­Á¿¬Â½«¾»®Á¾®¾¹¬¾¼¬½½¬»»¬À¸¬»½²¾¾¬¾¾®¾¼¬¾»«¾º®»¼®¾º«»»ª¹¹©½¸­»¸©»·¬º¸«¼»«¾¸¬Àº«¿¶©»½­½¹©»¸ª¹¹«»¸«»¹ª»´©º·«¼¸¬·»ª»º©»·­º·«»¸«»¶¦º·«¹¶ª»³©¸·¦ºµ§º´§¹´§·µª»µ¦·¸¤·´¬¹³¨¹³¥¹·¥¹³ª·»¬½·¬Á½¬¾½±¿¼¨À¿©À¾¬¿¼®Á¾«¾»¬Â»¬À½«Â»­À¾¬Â¼§Ã¹­Á¼±Â¿«Ã¼¬¿»­¿¾¬Â¾¬Á¿°Ã¾¬Á½©Á¹­À¾®Å½¬Á»®¿¾­Å½¬Á½¬Â¿±ÃÀ®Å¾®Å¿®Ä¾®Ã¾¯¾¿­ÃÁ­Ã¾­Ã¿¯ÅÁ­Ä½¯ÁÀ²ÅÀ°Ä½¯Å¾®ÅÂ°ÃÃ¯ÆÀ°ÄÁ­ÃÁ¯Ã¾³ÃÀ¯Æ¾¯ÅÀ¯ÄÀ³ÅÀ­Å¾°ÆÃ¯ÈÁ³ÆÂ¯ÅÀ³ÇÃ³ÇÂ²ÆÄ±ÇÁ³ÅÃ¯ÊÄ³ÊÁ±ÈÃ²ÇÂ³ÆÄ´ÈÃ²ÊÅ´ÈÆ±ÉÄ´ÈÅ³ÇÅµÊÆ¯ÊÂµÈÅµÈÃ°ÈÇµÈÆ³ÊÃµÊÄ´ÇÅ¶ÈÄ³ÊÅµÊÅ·ÇÇ³ÊÅ·ÉÈ¶ÌÇµËÆ³ÊÈ·ÈÈµÊÄ³ÊÈ·ÈÈ³ÊÆµËÈºÌÈ¶ÈÇ·ÎÊ·ÌÊ·ÊÊ·ËË¸ÌÉ·ËÊ´ÌÊ¸ÊÊ¶ÍÊ¶ËÈ·ÌÊµÊÈ´ÌÇºÊÆ¹ËÊ·ÌÊ»ÎÉ¶ÍÊ·ÎÈ·ËÈºÏÊ·ÒÊ·ÌÈ¸ÍÊ¸ÐÇ»ÐÊºÍÍ·ÌÌ¹ËË·ÌÈºÎÌµËÈ¸ÑË·ÎÊ¸ÏÌ¹ÎÊ»ÎÌ¸ÍÌ¹ÐÌ¼ÐÍºÐÊ»ÎÍ»ÐÎ¹ÐÊ¹ÐÌ»ÍÌºÏÌ¹ÏÐ¼ÒÎ¸ÎÌºÑÍ¹ÑÏ¼ÑÎºÐÉ¸ÏÍ»ÐÐºÎÌºÍÎ¹ÐÌ¸ÐÌºÐÌ»ÓÍºÐË¹ÐÍ½ÐÎ·ÑÊ·ÏË¹ÍÌ»ÓÍºÎÊ¹ÐÌ»ÐÌ»ÒÎ»ÑÐºÑÎ½ÒÏ½ÒÏ¼ÑÎ·ÍÎ¾ÑÍºÑÎºÒÍ¼ÐÐ¹ÒÒ¾ÐÎ»ÔÎ½ÔÐ»ÐÐ»ÒÒ»ÓÏ¼ÒÐ½ÐÌ¿ÐÒ¼ÓÎºÐÏ½ÐÎ¼ÑÍ»ÐË¼ÓÍ¼ÒÎ¼ÕÐ¾ÒÐ¾ÒÒ¾ÒÐ½ÒÎ»ÒÎ¼ÐÎ¿ÒÐ»ÓÐ¼ÓÍ»ÓÐ»ÒÐ»ÓÐ¿ÒÎ½ÒÒ¾ÕÑ¾ÕÎ¾ÐÒ»ÔÎ»ÕÕÁÔÏ¼ÕÓ½ÖÐÀÓÓ¼ÕÓ»ÕÐ¿ÑÒ¾ÕÓ¿ØÐ»ÐÎ¼ÒÐ¾ÔÐ½ÒÓÁÓÐÁÕÐ¾ÓÐ¾ÓÒ½×ÑÁÐÒ¾×Ó¿ØÒ¾ÔÕ¾ÕÕ¿ÕÒ¾ÔÏÁÔÓ»ÓÓ¾ÕÏ½ÑÈ¶È¿¬À¶³§©zunufkronoxt~zru{~zrtqqqnr{|wuoolnnluox¬¬µ°¤~tii~f~b{f|bkloz{z~¥¯¥~w§ ¤£~{wrkkddblg~giiwrzzzx{­§¥xtqtzuw|{xwz{rqnrukziki~dzixf|bzf~ii~nurnxun~g{f{doqkld|l]wiYtf_ui[tk]ui]qf_xkUuk_wlYxr]|ul¯ªÁ°¸Î»ÉÐÀÌÑÀÒÓ¾ÒÒ¾ÕÒÁÑÓÀÒÒ¿ÓÓ½ÒÏ¿ÒÔÁÕÐ¾ÐÏ¾ÐÐ½ÕÐ¾ÓÒ¿ÐÑ¾ÔÒ¾ÑÑ½ÐÒ¾ÒÐÀÑÐ¾ÑÏÁÐÓ¼ÓÐ»ÒÏ¼ÒÒ½ÓÒ¾ÑÍÀÓÑ¾ÖÌ¾ÐÐ¿ÒÑ¼ÐÓ¿ÒÎ¿ÒÒ¾ÒÎ»ÒÎ¾ÐÏ»ÑÒÁÎÎ»ÓÑ¾ÓÑ¿ÐÎ¼ÎÎ½ÑÒ¼ÐÌ½ÒÐ¾ÏÏ½ÒÍ¼ÐÎ¿ÐÎ¹ÎÊ¹ÎÎÀÎÎ½ÏÎ»ÐÎ»ÐÎ»ÌÏ»ÒÎ½ÑÊ½ÏÌ·ÌÌ½ÎÎ»ÐÌ»ÌÎ»ÒÍ»ÐÌ¹ÍÍ¿ÌÌ¾ÐÍ½ÑÎ»ÐÎ¿ÎÐ¼ÑÍ½ÐÎ¾ÏÌ¾ÒÏ¼ÐÎ¾ÍÌ¾ÑÍ»ÎË»ÐÎ»ÌÌ¼ÒÌºÌË¹ÌÐ¾ËÊ»ÎÌ»ÎÊ»ÌË¹ÌÌ»ËÏ¸ÎÌ»ËË»ÌÌ¹ÐÈ»ÈÇ¹ÊÉ¹ÊÊ¹ÊÆºÈÌ¶ÎÉ·ÌÅ¹ÊÈµÊÈ¹ÌÇ¶ËÉ·ÌÈ·ÊÈ´ÈÈ´ËÈ·ÊÅ³ÊÆ·ÌÈ¶ÅÅ³ÈÃ·ÊÈ¶ÈÆ·ÇÄ¶ÊÈ·ÇÆ¶ÈÇµÈÅµËÄ³ÆÆ³ÉÅ´ÉÆ´ÆÄ¶ÈÄ³ÉÄµÊÃ³ÇÄ¶ÇÅ²ÃÂ·ÆÆµÉÃ³ÆÆ³ËÃ³ÆÃ³ÊÃ²ÄÃµÆÅ³ÈÅ¶ÇÃ²ÅÂ²ÆÀ³ÈÁ³ÃÂ°Å¿±ÃÁ°ÄÂ¯ÈÁ³ÃÁ³ÇÃ°ÅÂ²ÁÀ°ÅÀ®ÆÁ³ÄÁ®ÃÁ³ÃÃ°ÁÁ±ÈÁ°ÅÀ³ÃÀ®ÀÃ³ÃÂ¯Ã¾±Ã¿²ÃÀ²Ã¿±ÅÀ°ÃÀ²Á½³À¿±Â¼¯Â¿²ÅÀ²ÁÁ´Ã½¬Á¿±Á¾®Å½°Á¼®Á½°Á¿¬Â¾®¿½¬Á¾­¿»­¿¾¯ÀÀ¬¿½¬Àº¯¾¼¬Âº°½½¬À½®¾»­¿½­À¿®¿»­¿¾¬Á»®¿»¬Á¼¬½¹©¿¹¬¿º¯¼¹©¾º«»¹«½»¬¾¹¨¾·ª¾º«¾¼¨¾·¬¾¹¬¾³ª··¢·µ¦»º§½·¬»¹¨¼¸¥¾¸©½·ª½¹«½·¨¹»¨»»§»¸§»·¦¹¹¨¾·§½¶©»»¨¾¸£»¸©½º¦»¹¨»º©»·©½¾¦½·§¾½§¼½¦¾º©¾¹©¾¼¨¾»¬½¼ª¼»§Á¹«¾º©À»ª¾º¨¿»­¿º©»»§¿»§¾»©¿¼ª¾»¬¿»¨Á»¬Á½¬¾»«¾¼¬À¾¬À½ªÀ»©¾¼ª¾¾¬Á¾¬À»ªÃ»¬Á¾¬Ã½«Â¿­Á¼­Æ½­Á¿¬¿¾©Á½¬ÃÁ®ÁÁ«Ã½¯Ã¾°ÃÁ±ÃÂ¬ÃÀ²ÄÁ°ÀÁ®ÆÁ±ÃÂ¯ÂÁªÅÁ²ÆÁ°ÃÂ­ÂÁªÂÀ³ÂÂ±ÇÃ®Ã¾³ÁÃ¯ÃÀ¯Ã¿­ÃÅ±ÄÄ°ÆÁ²ÄÁ²ÄÀ¬ÃÃ°ÂÅ°ÄÃ±ÈÁ±ÆÃ³ÃÃ²ÇÁ¯ÁÂ²ÅÆ³ÈÄ³ÇÀ®ÆÄ±ÉÃ²ÇÄµÈÆµÇÃ³ÇÄ³ÇÃ³ÈÄ°ÇÅ¶ÆÄ·ÈÇµÈÃ³ÈÃ²ÊÇ³ÆÃ³ÇÆ³ÇÄ²ÈÇ¶ÊÆ¶ÊÈ³ÆÆ´ÉÈ³ÆÈ³ËÈ¯ÈÅµÈÈ·ÊÊ·ÊÆ³ÆÃµÉÈ³ÊÆ³ÈÆµÉÆ´ÇÆ·ÉÇ³ÈÅ¶ËÉ¶ÈÈ¸ÆÉµÍÈµÌÅ¶ÊÊ·ÉÉ¸ÊÇ¸ËÉ´ÊÇµÉÌµÈÊ´ËÊ·ÊÈ»ÊÍºËÎ·ÎÈ¶ÌÌ·ÌÇ·ÍÇ¹ÌÈµËÊ·ÌÆ¶ÈÈµÌÊ¹ÌÊ¸ÎÊ¹ËÈ³ÍÆ´ÊÇ¹ÌÉ·ËÉ³ÌÊ¸ÎÊ¸ËÉ´ËÈ·ÌÈ¸ÏÊ¹ÌÈ»ÌÌµÌË¸ÍÌ·ÌÊ·ÌÌ¸ÌÊºÎÌ·ÎËµÍÊ·ÎÌºÍÌ¹ÌÌºÏË¶ÌË·ÑË¸ÏË¸ËÈºÎÈ·ËË»ÎÉ¸ÍÊ·ÎÊ¸ÍÊ¹ÌÎ»ÎÈ·ÎÌ¹ÏÏ¸ÎÇºÎË¹ÌË¹ËÉ¹ÊÌ»ÐÎ¸ÍÊºËÌ»ÑÌºÎÊ·ÌÊ·ÍÎ»ÏÊºÎÍ»ÎÌ»ÏÍºÌÌ¾ÎÎ¸ÐÌºÎÌ»ÎÍ»ÒÎ»ÎÌ½ÐÌÁÑÏ¾ÐÍ»ÌËºÐÌ¹ÑÊ¼ÌÎ»ÓÐ¼ÎÏ½ÎÐ¾ÔÍºÏÏ»ÏÎºÓÎ»ÏÎ»ÏÌºÏÏ»ÓÍºÎÎ»ÑÌºÎÎ¼ÏÍ¸ÐÊ·ÎÇ·ÊÇ´Ã¼°¾±°tglWzg_xud|w`{xf~fgxbr`w]~wbxbxd|ongbg|]z_t`|x_zz[{zf~foqltrn|_o_|tdb~lgxbzn³»«|{qff{Yu[|xb{`d|ntolirz¢¥|§{¥¦ª¥®¨zqgdzg|_w[zz_|t]|x_wf{kdrqtr|uzz§µ©«¢²ªxqfwfzg~g{rqo~klnnqo{lglo~zn|gfzzkzx`zu]xk[ug_qr`zr]wu`zq]ztfx|nino|wk~|f~wb{o[~q`|{i|d{z`zkWqbSrbSlbWliUndSk`Qo[Qn_Qo`WikWqf_wzrµ¨³ÄµÀÈ·ÅÌ¹ÉÌ¼ÉÎ½ÎÏºÍÌ½ÑÎ¾ÌÍ½ÒÏ¼ÎÏ»ÎÎ¹ÑÍ¹ÎË¸ÌÌºÌÌ¼ÏÌ¼ÍÐ»ËÊ·ÌÌ¹ÎÌ»ÎÌ·ÌÌ»ÊÌ»ÌÐºÌÌ·ÍÌ·ËÌºÏÊºÏÊ»ÏÎºÎÌ½ÌË¹ÏÍ»ÎÊ¸ÎÌ¼ÎÎºÎÌ¹ÌÌºÊÌ¼ÍÊ»ÌÊ¸ÊÈ·ËÉ¹ÍÊ»ÎÉ¹ÌË¹ÉÌ¸ÌÊºÊÌ·ÊÊ¸ÌÉ¾ÎÈ³ËÊ·ÉÆ·ÅÌ·ËÇµÊÈ¸ÊË·ÌÈ¶ÊÊ¹ÉÇ·ÊÆ·ÊÈ·ÈÈºÊÈ·ÈÈ·ÈÉ·ËÊ¶ÉÆºÈÉ¸ÌÊºÊÊºÊÊ»ÌÌ·ËË»ÍÈ¸ËÊ»ÊÉ¶ÊÊ»ÈÈµÊÈ·ÉÉ»ÌÊ¶ÊÈ¸ÉÈ¶ÍÈ·ÊÈ·ÈÈµÇÇµÉÆ¶ÈÉ¹ÉÉ³ÈÈ·ÇÅ³ÃÆ¹ÆÃµÉÄ´ÄÇµÆÄ³ÈÈ¶ÈÅ·ÆÅ³ÇÆ²ÆÅ·ÆÄ³ÄÄµÆÃ·ÈÃ³ÆÄ³ÅÂ¶ÄÄ²ÇÅ³ÅÂ´ÆÃ²ÆÃ³ÆÃ²ÃÂ°ÃÁ°ÄÆ´ÅÄ±ÃÀ±ÃÁ±ÅÀ²ÆÀ°ÃÁ²Ã¾³ÃÃ°ÂÁ±ÆÁ°ÃÁ±ÃÁ²ÃÁ±ÃÁ­Ä¿³ÄÁ²ÁÀ°ÂÀ¯Á¾±ÁÁ¯ÄÀ«ÁÁ²Á¾°ÃÀ­ÂÀ®Ã¼®À¾°Ã¿®¾¼°À½«Â½®¿À®ÃÁ°¾½­Â¿­¾º®Â¿®À¼®ÁÀ¬¾¾°Á½¯¾¼®Á½¬¿¼®¿»®Á¼¬½»®¿Á¬Á¼¬¿½­½º­À¾«¾»®¾»¬½¹«¾½©»»¬½»®¾¹¬¼¼­¿¾«¾º«¼º¯¾¾«»¸®»·«»»¬½¹©»¹®½½©À·¨½¹®»·¬¼»©»·¬º¸ª¾¹¥º¸§»¶«º»¦»¸§»´©·º¨»¸«º¸ª»¸§º´©¸¸¦ºº©º·¦¹µ©»·¥»´£º´¦·¶¤¹·¦¶³§¸´©»µ¥¹´§¸·©¹»®¾¼©¿¾ª¾»­¿º¬À½®Á¼¬À½«À¼ªÃ»¬Á¼¬¾¼ªÁ¼¯Á¾­Ã¿­Á½¬Âº®ÁÀ­Æ¼¨Á¼¬ÀÀ¬Â¿®Ã¼¬Á¿®ÃÀ¯Æ¾¬Â¾­Ã½­ÁÀ¯ÃÁ¬Ç¿¬Ã¿²Á¿¯Æ»¬Å¿®Â¾¬ÆÁ¯Ã½¬ÁÁ¬Å½®ÃÂ®ÆÁ­ÁÀ­ÃÀ¯ÆÀ®Á¾®Ç¾­Æ»¬Å¾­ÃÁ®ÅÁ²Â¾­ÆÁ°ÃÀ°ÅÀ®ÅÁ®ÇÂ±ÅÃ³ÆÁ¯ÈÁ°ÅÃ´ÆÄ´ÆÁ±ÆÃ²ÇÁ³ÈÄ°ÉÃµÇÃ±ÅÃ±ÈÀ³ÇÃ°ÆÆ°ÆÇµÆÆ·ÈÆ³ÇÄ²ÇÅµÊÆ³ÆÃµÈÅµÇÇ²ÌÅ³ÉÂ²ÆÈ´ËÁ´ÈÆ¶ÉÃ³ÊÇµËÆ´ÈÈ¹ÍÆ±ÈÂ¸ÊÇµÊÇµÊÈ³ËÇµÊÇ³ËÅ¸ÌÆ·ÈÈ±ÍÆ´ÊÆ·ÌÈ´ÍÊ¸ËÈ¶ÇÊ¹ÌÆ·ËÉ¶ÊÉ¸ÌÊ·ÈÇ·ÎÉ³ÌÈ´ËÈ¹ÊÊ·ÌÈ¸ËÈ·ÌÊ·ÐÉ´ÌÇ¶ÌÉ·ÌÊ¹ÎÊ·ÌÊºÐË¹ÌÊ¸ÏÉ·ÌÉ´ÎÊ·ÌÊ·ÐÌ¹ÒÊ»ÎÇ·ÎÍ¼ÏÌ¶ÐÈ»ÎÍ·ÎÊ»ÎÌ¹ÎÊ¸ÍË·ÎÌ»ÐË»ÏÊ¹ÑÎ»ÍË·ÑÊ¸ÏÏºÏÌºÐÍ»ÐÌ¹ÏË»ÑÎ»ÐÌ¾ÐËºÐÑ¼ÐÍ½ÐÍ½ÐÌ»ÒÊ¾ÒÌ»ÑÍ¾ÒÏ¼ÒÊ¹ÏÍºÐÌ¹ÑÌ·ÑËºÒÍ¹ÐÌ¼ÒÎ·ÒÊ»ÏÍ¼ÐÏ»ÒÌºÐÊ¹ÐÌ¾ÐÎ¹ÒÌ»ÎÍ»ÓÐ¸ÖÎ¾ÑÎºÔÌ¼ÓÓ¾ÒÐ¾ÑÒ¾ÒÍ½ÑÐ¿ÒÓ½ÕÌºÒÎ½ÐÏ¼ÒÐ»ÑÌ»ÒÐ¾ÒÏ¼ÓÐ½ÔÏ¿ÓÎ»ÒÍ¼ÒÏ¾ÒÐ¼ÓÏ¾ÓÎ¹ÐÑ¾ÓÍ»ÐÌ¿ÑÎºÑÒ»ÔÌ¼ÒÌ¾ÒÌ¿ÐÏ¾ÑÎ»ÒÐºÕÏ¾ÒÒ¾ÔÎ»ÒÑ¿ÒÐ¿ÖÐÀÕÎ½ÓÔ½ÔÓÀÕÐ¾ÖÒ¾ÕÑ¿ÓÑÃÕÖÁ×ÒÃ×ÓÁÒÒÀÓÒ»ÖÒ½ÓÔ¾ÒÐÂÖÒ½ÒÒÁÖÒ¿ÕÓ¼ÓÐÁÓÒ¼ÒÐ¾ÔÎ¼ÒÒ¾ÕÓ¾ÔÒ¿ÓÓ¾ÓÑ¾ÓÒ¾ÓÐ¿ÒÑ¾ÒÒ¸ÎÈ´É·¥¹§|rq_n]ubwb{gkrixfu`zbz`zf~nonntguiu_u_~ubx`zg|b|dxfl|ntwoi|`zlinqrooo¤£{rlkfklknntuxu{¦¨© · ³¦¨£¨ ²¢²¥·§»«¯¥®£¦~uoogf~bd{bzkblnwur{|zz¤£ |xqlololknootwokizdzfuk{b{g~~oix`qb{u[n`~n`wdf|i|girulonfzf{l|glz`rbiYwf[uo`rn`tl]wi[ufWxiYur`|ob{r¶ ±¾®·Ê·ÊÏµÊÍÀÌÎ½ÐÒ¾ÕÓ¾ÑÒÂÒÓ¼ÓÐÁÕÑ¼ÒÒ¼ÓÐ¾ÐÏ¿ÑÐÃÐÐ½ÒÍÀÏÒ½ÕÓ½ÔÐ¾ÒÐÁÒÎÀÔÑÁÒÎ»ÓÐ¼ÓÐÀÎÒ¾ÓÐ¾ÐÑÀÒÐ¾ÓÓ¾ÒÑÁÒÎÁÓÓ¿ÕÐÀ×ÐÀÐÐÁÒÒÀÐÐ½ÐÎ¼ÒÍ½ÑÐ¿ÐÏ½ÑÎ¾ÑÎ¾ÑÑÁÐÐºÒÍ¾ÎË½ÑÐ¹ÑÌ¿ÒÎ¼ÐÎ¼ÏÎ»ÌÊ½ÏÐ¹ÎÍºÐÐÁÎÌ»ÒÌºÎÐ»ÑÎ»ÑÎ½ÐÍ»ÐÎ½ÎËºËÌºÎÍ»ÌÎ¸ÎÌ¾ÐÌ»ÐÐ¾ÎÍ½ÒÒÁÎÎ¾ÑÎ»ÏÌ¿ÏÎ¾ÎÍ½ÐÎ½ÎÍºÐÊ¼ÎÊ¼ÑÌ»ÒËºÌÊºÍÌ»ÍÌ¾ÏÊ¿ÏÌ»ÒÊ»ÎÌ¼ÎË·ÍÊ¸ÐÊºÊÈ½ÐÊ·ËÊ»ÍÌ»ÎÉ»ÌÊ¹ËÈ·ËËµÎÈ·ÊË·ÐÊ»ÍÆ·ÊÊºÌÉ·ÌÈ·ÌÇ·ËÉ¹ÊÈ¶ËÈ·ÉÈ¹ÌÆµÊÅ¹ÉÇ³ÊÆ¶ÉÆµÈÄ³ÊÈ·ÉÅ¶ÊÇ³ÅÄ´ÈÆ¶ÈÃ³ÇÅ³ÊÁ¸ÇÆ·ÆÆ´ÆÄµÈÃ³ÈÃµÇÅ´ÅÁ³ÇÆ³ÆÁ²ÉÄ·ÅÂ±ÆÅ³ÈÅ¶ÈÃ³ÈÁ±ÆÂ°ÆÃ°ÅÃ·ÈÃ³ÃÃ´ÅÃ±ÆÀ´ÆÂ³ÅÄ³ÆÃ±ÆÃ´ÈÁ±ÆÀ¯ÅÃ±ÃÃ³ÄÁ±ÃÁ°ÅÂ°ÅÂ²ÆÂ³ÄÁ­Ã¿±Ã¿²ÆÃ­Å¿²ÃÁ³ÁÀ³ÃÁ¯Á¾°Å¿¯Ã¾¯ÃÁ®Á¾°Ã¿®ÃÀ±ÁÁ¯Ã¾­Ã¾®Ã¿´Æ¾¯Ã»±ÃÀ±Á¿¯Á¿­À»¯À¿®¿¾­Âº­½½¯Â¼¬Áº®¾»¬À·°¿½±Á»­Á¾©¾¹¬¾¼¬Á¾¬¿º¯¾»«½¾¯À¼¬¾¸®½»«½¹­¿º®À¼ª¿º¬¾¼¬½·©½º¬¾¹ª¼»ª¾¸§½¹ª»³¥¶µ§¼µ¥¹·§¼¹¨¹¸¤¸·¦º»¦»¶©½·©»·§½³¨¹¹§½·¨½¸ªº¸«»¶¤½·ª»¸§»»¨¾º§»¶«½¹«½·©½·¬½»§½¸©»º¦½¸¬¾º§½¸«¾»«ºº©¾·¨»»«Á»«À¸§½·¨¾º¨Á»©¼º­½»©À¸§¾»­Á¾¨¾¸«Á»¬Â½®¾¾©¾»¨¼¹ªÀ½ªÀ»©¿»©Á¾­Å»¬Á¾©À»©Á»®ÃÀ¬¿¾®Á¾°Á»®¿¾«Á¾­Ã»«¿»®Ä»¬Á½®À¾¬ÃÀ®Â¾¬Ä¾®Â¼­ÃÁ²ÀÀ±ÅÁ±Ã¿­ÃÀ³Ä¾¬ÄÀ®Ã¿«ÆÁ®ÃÀ¯ÃÀ±Ã½°ÄÁ°ÁÁ±ÄÃ¯Æ¾³Ã¿¯ÄÃ­ÃÁ³ÃÁ±ÃÁ±ÅÁ®ÇÁ±ÄÃ²ÃÃ³ÅÁ²ÄÁ°ÆÃµÇÁµÅÄ³ÊÁ²ÄÂ¯ÆÂ±ÅÄ´ÇÄ³ÈÀ³ÇÄ³ÆÃ³ÆÅµÇÁ´ÆÃ³ÅÁµÆÄ¯ÊÃ³ÄÂ·ÉÈ³ÈÃ³ÈÅ³ÆÄ³ÇÆ´ÈÅ¶ÈÄ´ÉÆ³ÈÅ³ÈÆ²ÉÆ´ÅÄ³ÈÆ²ÊÅµÈÃµÆÃµÊÊ±ÊÃ³ÇÆµËÄµÈÆ·ÊÊ·ÊÈ¶ÉÄµÇÈ´ÊÆµËÈ·ÈÄ¶ÊÌ·ËÈ·ÈÆ·ÊÈ³ÊÇ²ÍÇ·ËÉ¶ÎÈ³ÊÉ´ÌÈ·ËÇ´ÊÇ³ËÇ·ÌÊ·ÍÈµÊÈ¹ËÊ¸ËÊ·ËÈµÌÈ±ÈÇ·ÏÉ·ËÌ³ÌÊºÌÈµÌÇ¶ÌÈµËÉ¸ÊÊµÌÈ¶ÊÆ·ÉÉºÉÍµÎÈµÊÊ·ÌÇ¶ÌÉºËÇ¹ÎÌ¸ÎÈ·ÌÉ»ÏÌ¹ÎÉ»ÍÌ¸ÍÌ¸ÌÉ¸ÐÆ¶ÊÉµÐÌºÎË¸ÎÌ·ÌÌµÐÊ»ÍÈ¹ÌÊ»ÐÈ¸ÌÊ·ÐÌºÎÌºÉÌ¹ÎÊ¹ÍÉºÎÌ¹ÏÌ¹ÌÌºÑÌºÎËµÍÊ»ÍÍ¸ÎÊ·ÒË¸ÎÊ½ÎÌ¹ÏÌºÌÌ·ÏÍ¼ÐÌ»ÐÏ»ÐÎ»ÐÍ»ÐÎ»ÎÎ»ÏÎ¼ÌÌ¹ÎÌ»ÐÎºÑÏ»ÎÌ»ÑÍ»ÒÍ»ÎÏ»ÐÍ·ÌÏ¼ÎÏ»ÒÌ»ÒË¹ÏÏ»ÑÏ½ÒÍ¹ÌÊ»ÎÎ¸ÌË¼ÐÌ»ÐË¸ÐÌ»ÌË¹ÊË¹ËÊ¹ÇÄ±Àª±|o_b]xkUun_{f[zqgg|ft]n]xk`~z`w[ztd|~b{wk|td~t`~rWzlYtkUwiYwiUukYwqYwn`xt_zn_{u]zzg~ngzkxdz`xlow|wtlk`|nlrrqff|fdfid{fflnz¥´»² ³§°¦¯£® §¢· ¸¥Æ¯·©¯¤§rkglb|`|]{]~]d{gkliql|fluknrzw{{tnlldzoiruqgz`ziq~zk{bw]~t[xr[zuYxn[unWzkYuqYti[{q]wiYuo`znYwqYzkWwn_zrdx~f||`r`{ug|xkb{lzk|_o_zqg|u`zq_xgWwfUrbUn_[oiWq`UobUl`Qo]YigYql[wgYzz§¥°¬¹©»ÈºÉÍ»ËÊ»ÌÌ½ÍÌ»ËÊ¹ÎÎ»ÐÍ»ÏÌ½ÎÌºÎÎºÐÌ»ÎÌºÎÌºÌËºÐÌ»ÎÌ¸ÎË»ÎÌ»ÌÎ¹ÎÍ¸ËÎ¾ÌÌ¸ÏÎ¼ÊÉ¹ÊÌ»ÌÌ·ÎÈ»ËÊºÌÍºÎÌ»ÍÌ¾ÏÌ»ÌÊºÊÊ»ÌÊ¹ÌÈ¸ÌÊºÌÊ¸ËÈ·ÌÇ·ÊÌ»ËÊ¸ËÊ¸ÊÈµÍËºÉÊ»ÎÊºÎÊºÍÊ»ÊÊ·ÌÊ¶ÈÊ·ÊÌ¸ÍÆµÊÇ·ÉË»ÉË¸ÎÆ¸ÌÇ¸ÉÉºÉÇ·ËÇ´ÊË¸ÈÆµËÈ¼ÍÉ¶ÊÈ¸ÉÊºËË¹ÍÉ»ÌË¸ÈÉ¸ÌÌ¸ÊÊºÈÉ¸ÈÊ¼ÊÉ¶ËÈ¸ÎÅ¸ÌÈ¶ÊÊ·ÈÈ´ÉÆºÊÆ·ÊÆ·ÊÈºÊÇºÇÄ³ÊÇ·ÈÈ·ÇÁ´ÉÅ²ÉÇ³ÇÆµÉÆµÆÇµËÇ·ÊÃ³ÄÆ´ÆÃ·ÈÉ·ÈÅ·ÆÆ´ÄÃ´ÆÅµÆÆ¶ÈÅ±ÇÄ¸ÄÈ²ÄÃ²ÃÃ±ÅÂ·ÅÃµÄÂ²ÁÂ´ÃÃ±ÆÁ²ÁÃ²ÇÁ³Ä¿²ÃÃ¯ÇÁ±ÆÁ°ÃÂ³ÁÀ¯ÄÁ®Á¾­ÁÁ¯Ã¿±ÂÀ²Ä½³Â¾ªÁ¾¯Â½²ÂÁ¬Â¼­Â½­Á¾¯Ã½®¾¾¯ÄÁ®Á½°Á¾°¿¼­Á¾±Ã¿®Á¿°Ã»­¿¾²ÀÀ®Ã½°Àº®¿¾®Â½¬¾¼®¾¿®¿½ªÁ½­À»¬Á½ªÀ¾®Á¾®¿»¯¾½®¼½­Á¼¬¾»«»½«½»±¾»¬¾º¬½º¬½¼©½¸®»¹­À¹®¾»¬½½¬¿»­»·¬½º®Á»©½·¨¼º¬½»ª¾·©¼º«¼¸ª¼·ªºº¬½·©»¶¨¼¹¬»¸ª½¸ª¼·©½·©½¹¨»¸§»¸¬¸·©»·¨¼¸©»·§º²«¸·ª¹·¦¹³§»µ§¹·¤¸µ¦º¶¤»·§¹³¥µ´¦·²§·µ¬»³¬º»¬À¼¬¿¼¬¿¾­¿»­Á»¯Ã¿¯Á»¬Á»¯ÀÀ¬Ãº¬Á¾¬Â½«Á¿­Á¾²Â¾¬Á»±Á¿¯À¾ªÁ¾¬Á½¯ÁÀ­Á¾¬Á¼°Ä¾°Â¿­Â¿¬Â½°ÄÀ­Æ¿®Ã¾¬Á¾­Ã¿°¿¿®Ç¾¬Å»°Â¿°Á½®Ã¼®Â½°ÄÁ®Ã¾®Ã¿¯ÃÂ²Å¼²ÆÁ²Æ¿³Å½°Ã¿°ÅÀ­ÄÁ­Å¾°ÆÁ±ÃÅ³È¾²ÄÁ´ÅÁ¯ÆÀ´ÄÃ¯ÃÂ³ÆÁµÆÂ³ÆÅ±ÇÂ²ÆÃ³ÃÃ³ÊÃ³ÄÂ²ÄÄ±ÇÄ³ÇÄ³ÈÃ´ÈÆ´ËÆ³ÇÇ³ÉÄµÊÃ¶ÆÄµÊÂµÆÅ´ÊÅ´ÈÆµËÇµÆÁ¶ÊÇ¶ÊÄ±ÈÃ¶ÉÈ´ÌÃ·ÈÅ³ÊÅ³ÌÆ´ÈÅ³ÌÇ·ÈÇ±ÉÆ¶ÈÆ´ÈÌ·ÌÆ¸ÌÆµÈÈ·ÌÇ»ËÆ·ÍÈ¹ÌÉ¸ÌÈºÌÈ·ÌÉ·ÈÈºÌÇµÍÄ·ÊË´ÎÈ¹ÍÈ·ËÈ¼ËÈ·ÌÈ¶ÊÈ¸ÌÊ¶ÍÈ¶ÊÊºÌÊ¹ÎÇ¹ËÈ¸ÍÊºÍË¸ÐÈºÎÊ·ÍÍ¸ÊÌ¶ÍËºÍÇ·ÍÌ»ÌË»ÑÌ·ÐÊ¸ÎÍ¶ÎÊ»ÎÌºÍÌ¾ÑÎ½ÍË½ÎÍ¼ÏÌ½ÒÊ»ÎÌ·ÐÊºÎÎºÐÊ¾ÏÌ½ÑË¹ÐÎ¾ÑÍ»ÓÍºÑÍ¾ÐÌ¼ÐÐ»ÒÌ¾ÒÌ½ÎÎ»ÓÌ´ÌÎÀÓÏ¹ÎÊºÏÍ¼ÏÍ»ÑÌ»ÎÏ»ÏÍ»ÒÍ»ÒÍ½ÏÍºÐÐ¹ÑÎ¼ÐÏ¾ÑË·ÓÎ¾ÎÍ¾ÎË»ÑÎ·ÒÍºÐÎ·ÒÌ»ÐÐ»ÑÓ½ÒÐ¿ÓÑ¼ÕÒ½ÐÒ¾ÓÐÁÓÐ¼ÒÐ½ÑÌ¾ÒÐ¾ÕÌ¿ÕÎ¼ÐÑ¼×Ð½ÖÍ¼ÒÎ½ÑÎ½ÕÎ½ÕÎ»ÒÐ¾ÕÎ¾ÐÐ¾ÕÐ¾ÕÌ¾ÒÑÀÓÑ½ÕÎÀÕÏ¾ÕÏ¼ÓÐÁÓÐ¾ÒÎ¿ÓÑ¾ÐÐÁÓÒ¿ÓÑ½ÓÐ½ÓÒÁÔÓ¾ÓÒ¿ÒÒ¾ÑÓÀÒÐ¼ÓÓ¼ÓÓÁÖÔÀÔÒÀÔÑÁÓÕÂÕÐ¾ÓÒÁÖÓÀÕÓ¿ÖÕ½ÕÐÁÒÑÀÓÔÀÕÒÀÕÐÂÕÑ½ÔÒÁÒÓ¿ÒÒ¾ÕÒ¾ÓÓÂÒÒÀÕÑÂÒÐÀÏÒ¾ÑÌ»È¼¬¾«¬{tgodu`{iub~nlrkk|gzl{gwl~k|~iugodu]|u]{r`q_~r]wbwdxi~kdtuuxzwwx¤z{~~qututxuurnkqqknorw¬¶¤Å¬¿¬Á¬Á¯Æ²Á±¯¬Æ±Ì¨³Ý¬ºË¥µÁ±¬¤¤¡wu{uonnqooo{w{££{|rnqux{~x|qtzxqogk|k{`zbxdx`qdt`u]u`u_td|wfxfokxo{dt]ngxlqnlzlnor~kuixdwizi~bod{l]zkbwo`xk_xi`rgbug[un`tn`zo`wt£³¨±Ã«¾È¶ÈÌºÌÏ¿ÎÓ¿ÓÒÂÔÏ¾ÒÓ¿ÖÓÀÓÒÁÓÕ¿ÔÑ¼ÓÐÁÒÑÁÔÒ¾ÓÑÀÓÒ¾ÓÓ¾ÔÔ¾ÒÐ¿ÓÒ¾ÕÑ¾ÒÌ¾ÓÐ½ÒÐÁÓÏ¿ÓÐ¼ÓÐ¾ÓÐ¾ÓÎ¼ÒÐ»ÐÌÂÐÒ¿ÓÐ½ÕÍ¾ÓÑÀÑÐ¼ÐÐ¿ÒÌ¾ÒÍ¹ÎÎ½ÐÐ¼ÑÎ¼ÐÍ½ÑÑ¿ÒÎ»ÒÍÀÐÌ¾ÑÑ¼ÑÌ¾ÒÍ¿ÎÍºÏÎ¹ÎÐ¿ÐÎ¾ÐÌ»ÍÌ»ÍÍ½ÎÍ»ÎÊ¼ÌÎ¼ÒÍ¾ÏË¼ÏÌ¾ÍÐ¾ÑÎ¾ÒÊ¾ÍÏ»ÓÌºÎÌ½ÎÐ»ÏÎ¼ÐÐÁÒÑ¾ÐÎ¾ÍÎÀÑÒ¾ÒÎÀÑÌ»ÐÎ½ÑË»ÎÍ»ÏÍ¼ÍÎºÐÌ»ÐÌ»ÌÐ»ÎÎ»ÎÎ½ÌÊ»ÎÐ½ÍÊ»ËÊºÓÌ¼ÌÈ¾ÍË¸ÍË¹ÍÊ»ÎÉºÍÉ·ÌË½ËÊ»ÌÈ¸ÌÊ¹ËÈ¶ÍË·ÍÆ·ÌÈ»ÎÌ·ÍÉ»ÌÉ·ÌÈ·ÉÃ·ÉÈ·ÊÆ¸ÉÆºÊÈ·ËÅ·ÈÃµÈÄ·ËÇ¶ÈÅµÌÅ·ÈÆµÈÃ·ÆÃ·ÈÅ³ÊÄ²ÈÇ³ÌÅ¶ÈÅ¯ÆÃµÆÂ¶ÈÃ³ÅÅµÅÆ´ÈÅ³ÆÅ³ÅÃ³ÇÅ´ÇÁ·ÆÅµÈÆ³ÇÃ¶ÈÃµÆÃ´ÈÁ´ÆÄ¶ÄÃ³ÊÂ´Â¿·ÅÃ³ÇÂ¶ÄÁ¶ÊÃµÄÁ°ÄÀ³ÃÅ³Æ¾²ÄÁ³ÃÁ³ÅÀ³ÃÃ³ÂÀ¯ÃÁ°Ã¾³Á¾¶ÅÁ°È¾±ÃÁ²ÃÀ±ÃÁ²Ä¿±Æ¿°Á¼°Ã¿±ÃÁ­ÃÂ´ÃÁ­Ã½³Ã¾¯ÃÀ°Á¾µÃ¾²Ã»­Á½³Ã¾¯Á»®À½¯¿À­Á¼²¼½°Ã»¯Ã¼®½½¯Á»¯Á¿¯Á¾´À¾«¾»­½»ª¿¼­Ã»­Áº¯¾½®À»­¾º¬Àº­Á»¬¼»¯¾¹¬À»§¼·®¾½®¾¹«¾¶¬½¸®»º©»¶¬¾°¨´´¦»¹¦¸·©»·§»»¥º·©»º¦¾µ©¾´©¼·ª½·¦¾·§¼¸«À¸§»¶¨»º¬¾·¨½·¨»»¬»¸§¾¸¦¾·©»»¨¾·¬¾»§¼º©¿¼©½·ª»¹§¼ºª¿»©À¸«Á¾¨¾¸¨¿¸©½½ª¼¸¬»»¬À¸©½º©À½ª½º§¿»§¾º«¾¹ª¿º«¿¼«¾½¬À»¬Àº­½»«Áº®½º§¾»ªÁ¾§¾¹¯¿½­¿»®À¾­Ã¾®¿¹«¿»ªÃ½ªÁ½®À»­Ã¾ªÂ¾±Ã¼®À¾¯Â¾¬¿¾¬Ä¼¯À¾¯Ä¼¬ÅÁ¯Â¿®Ã½±Ã¾¯ÅÀ°ÆÃ®Ã¾­Á¿°ÅÃ°Ä¾°Æ¿®Ã¾®ÃÀ°ÃÃ¯ÄÁ°Ç¿±ÅÂ³ÃÁ°Ç¿®Ã¿°ÄÁ®ÅÁ²ÆÀ®Ç¾®ÄÂ³ÃÃ³ÇÂ°ÆÁ°ÄÃ·ÈÃ±ÇÄ®ÅÄ°ÄÃ²ÆÃ±Ä½´ÇÃµÇÃ²ÆÃ³ÇÃ²ÈÂ®ÈÃ³ÇÅ²ÆÃ³ÆÁ³ÇÄ´ÈÅ²ÉÄ³ÈÂµÇÆ³ÉÅ³ÇÃ´ÆÄ³ÊÄ²ÄÃµÆÆµÈÂ´ÉÄ¸ËÆ³ÊÅ³ÈÆ¸ÊÆµÊÇ·ËÃ²ÊÆµÊÊµÈÆ·ÈÅ´ÊÈ²ËÉ·ÊÇ·ÌÈµÈÇµÍÆ·ÈÅ¶ÊÆ³ÊÃ·ÌÈµÍÆ¸ÈÆµÌÉµÌÇ·ÊÇ¹ÌÈ¶ÌË¸ËÈ»ÊË·ÌÊ·ËÇ´ÍÌ¶ÊÈ¶ÍÅ¸ËÈµËÉ·ÎÇ¶ÈÆ¸ËÈ³ÊÇ·ÍÉ·ÌÇ¶ÌÇ´ÎÈ»ÌÉ¹ÍÃ¸ÊË´ÎÇ¹ËÈµÌÆ¸ËÈ´ÎÈµÍÊ¶ÌÉµÌÊ·ÌÊ¸ÐÈºÎÈºÐÈ¹ÎË»ÎÌ¸ÏÌ¸ÎÊ·ÎÌ¹ÍÌ·ÎÉ¸ÍÈ¸ÎÈ·ÏÈ¸ÏÊºÐÇ·ÌÈ¸ÎÈ»ÐÌ·ÏÇ·ÌÊ¸ËÈ¸ËÊ»ÐÇ¹ÏËµÊÎ½ÎË¸ÏË»ÎÊ¹ÏË¾ÎÈ¸ÏÉ»ÎÍ»ÎÊ·ÐÊ»ÑÌ»ÐÎ¼ÔÊ»ÍÊ¾ÏË»ÎÌ¾ÏÍ¼ÐÐºÏÌ»ÒÐ¼ÌÌ¾ÐË¼ÐÏ»ÏÍºÑÎ½ÎÌ»ÎÎ¹ÒÎºÐÍ¾ÑÌ»ÒÌºÐÌ»ÐÏ¾ÑÐ¼ÎÌ¼ÏÌºÏÏ»ÒÈ½ÌË»ÎÍ¸ÏÈ¸ÈÄ´ÆºªÁ£®xlkYwiWwn_zt_zk]uzd~~gk`rf~q_xn[wgWzn_xl[{nYtg[rdQxkQtiYtkSulWxkSwi_wu_||`~i~gku{~|{zzruuqrlg{ir`xgngikiibfbilq{¡¬´¡Ã«Ñ°Ð¡²Ê£µÇµÁ°¾±Ò¥·Ùª½Ë¥¹Ã²´ª¬¢¥{¤zwutkrnoknou|¢±­£­ xqnqtwzz|ztrqlknk|i|gzbrfu_t[o`|qWznY|kUzn[ziU{oYxi[tr]znd|tiz~o~f|w`~o`{o_wk]tldwxd|xd~u`{u[{ql|niwdt`~u`w_{qbzr]|bYr`Uo_[t`QqWOk`WlYQogYnd]t`Wri[z¦¥À¬¸Å³ÃÆ³ÇÊ¸ÌÌ»ÌÌµÎÏ¼ÎÌ»ÐÌ»ÐÐ»ÏÌ¾ÏÍ»ÌÉ¸ÎË¿ÍÌ»ÍÌ¸ÎÌ»ÐÌ»ÐÏ»ÍÊºÎÊ¼ÎÉºÌÍ¸ÌÈ¾ÎÍ¸ÎÊºÊÍ½ÏÌ»ÏÌ»ÌÉ»ÉË·ÍÌ¹ÌÈ½ÌÍ¸ÏÈ½ÎÉ¹ÌË»ÌÊ·ÊÊ¹ÌÉ»ÌÈ·ÎÊ¹ÊÊ·ÌÈ¸ËÉºÉÇ·ÎÉ»ÌÇ¸ÉÈ¸ÌÈºÎË¹ÊÇ»ÌÆ·ÌÇ·ÍË¹ÍÇ¸ÇÇ·ÌÆ¸ÈÈ·ÍÉµËÄ¹ÊÆ·ËÆ·ËÇ¸ÇÇ·ÊÊ¹ÌÇ·ÊÈ¹ÊÈ´ÊÈ·ÊË¹ËË·ÍË¼ÌÆ·ÇÊ·ÊÆ»ÊË¼ËÈ·ÊÆ·ÈÈ·ÈË¹ÊÆµÊÈºÊÈ·ÊÇ·ÈÆ¸ÉÉºÌÅ³ÊÅµÊÈºÊÉµËÆ¸ÆÆ³ÈÇµÈÆ·ÊÆ¸ÆÅ¶ËÆ³ÇÆµÈÃ²ÉÇµÇÅ·ÆÆ¶ÊÆ³ÆÃµÆÃ³ÊÃ·ÆÁµÇÃ²ÆÄµÇÄ³ÉÀ²ÇÁ²ÃÃ´ÃÄ´ÄÄ±ÄÀµÃÂ±ÃÆ²Å¿³ÃÁ²Æ¾²ÃÀ³ÇÂ³ÄÀ¯ÃÀ°Á¾³ÆÁ±Ã½²Ä¾²Á¿°Ä¿¬À»²Â¿­Á¾³ÂÀ¯Ã¿°Ã¿®Ã¾²ÁÁ¯Á½¯Ã¾®ÀÀ³Ã»±¾¿­Ã¼±¾¾²À½²¿¾¯Áº¬ÀÁ­¾¾¯À»®Á»¯¿¾¬Á¾¬¿»­Áº°Á¾®À¼¬½¹«Á¼®À»«Á¹®¾º©»º¬À»¯Â¾¬½ºª½¸¯º»«»»©Á¹¬»º¬½¹®¼¸­¾¼­¾»ªÁ»«½º«¾¾­À·«½º­½º¯½¸ªÀ¸¬Á·«¿·§¼·ª»º§»·¬¹·¨¸¸«¼´©ºµ¬¼¹¨½¸§»´ª·¸§»¸§º´«»¶«º´§»¶¨º¸«¸·¦»¶¨¸³¨»µ§»³¨·¸©»´§¹¶¨¸±¤··¤·³¦¶³¦·´¥º¶¨·³¬·»ª¾¹¬½¾¬Á¿®Á»®Á¼­¾¾¯¾º«»¼ª¾À°Á¿«Á¼ªÃ½®Â½¯¿¾¬¿¼¬Â¾¬Ã»¯Ã¾­À¼®Â¾¬ÂÁ±ÃÂ¬À¿¯ÀÁ¯ÁÀ­Â¿±Ã¾­¿¾¬Â½¯Â¿²ÁÀ®Ç¿±Á¿¯Å¾±ÂÂ³Â¾³ÁÀ¯Ä¿¯Â¿®ÁÀ²ÃÁ­Â¾¯Ã¿¬À¿¯ÃÁ²ÅÃ²ÂÁ±ÆÁ¬ÆÁ¯Ã¿®ÆÀ°ÁÁ®ÅÀ°ÄÄ¬ÆÂ²ÅÂ²ÈÂµÃÂ±ÇÂ³ÆÄ®ÃÁ´ÇÂ±ÃÃ°ÅÂ²ÇÃ·ÅÃ±ÆÁ³ÆÃ¯ÈÂ³ÅÂ²ÆÂ³ÈÈ³ÉÂ³ÇÄ¶ÉÃ³ÈÃ³ÇÄ´ÌÁ´ÉÃ°ÊÇ´ÈÅ´ÈÅ³ÆÇ´ÊÅ²ÇÅµÅÂ¶ÇÅ·ÊÅ³ÉÈ·ÈÈ·ÉÆ³ÈÆ·ÈÈ¶ÉÆ³ÌÅ¶ÇÆ·ÈÇ¸ÌÆ·ÉÄµÈÌ·ÊÆ³ÆÈ¶ÌÆ²ÌÇ¹ÊÊ¸ÊÆ¶ÊÈ·ÉÆ·ÉÆ³ÉÈ³ÉÈ¹ÊÈ¶ÌÉ¸ÌÇ·ÌÊ¹ÌÊ¹ÌÇºÌÈ·ÌÊ·ÌË·ÌÇ¸ËÊºÌÌºËÊ¹ÎÍ¶ÐÌ¹ÌÈ»ÌÌ·ÍÊ¾ÏÈ¹ÐÊ»ÌÊ¸ÍË¿ÍÌ·ÌÌ¼ÎÈ¾ÑÊ¹ÎÎºÍÌ»ÑÐ»ÎÌ»ÐÌ¿ÐÌ¼ÐÍ½ÎÉ»ÍÍ½ÌË¹ÑË¾ÎÍºÌÏ¹ÐÈ»ÌÍºÎÐ¼ÐÉ»ÎÊ¾ÍÉ»ÑÍ»ÏÌ»ÒÎ¾ÒÏ½ÐÊ»ÒÎ¾ÏÎ½ÐÍºÒÎ»ÐÑ¼ÐÌ¸ÍÎ¹ÐË»ÒÎ»ÐÎ¾ÒÍ½ÐÎ»ÒÌ¼ÐÌ¹ÒÊ»ÒÏ¿ÕÎ¼ÒÌ»ÐÌ»ÑÎ½ÒÎ»ÎÌ»ÎÏ¼ÑÐ½ÓÍ¾ÑÒ»ÒÐ¾ÏÐ¾ÔÍ»ÒÍ¾ÒÒ½ÔÐ¾ÒÒ»ÑÍ½ÕÎ»ÓÏ¾ÕÌ¼ÏÏ½ÐÎ»ÓÐ½ÑÎ¼ÒÒ¼ÔÒ¼ÔÐÁÒÎ¿ÒÎ¼ÔÐ¼ÓÐ½ÔÒÁÕÎ»ÑÐ¾ÓÑ½ÕÍ¾ÒÒ¾ÐÏ¾ÑÎÂÒÑÁÓÑ½ÕÒ¾ÕÒÁÖÒ¼ÓÕÁÒÒÁÓÎÀÖÓ¾ÓÓ¾ÓÕ¿ÓÑÂÖÕ¿ÓÒÀ×ÓÁÕÓÀÒÔÀÕÓÁÑÔÃÓÓ¿ÓÎÀÓÒÀÓÕÀÓÓÁÕÓÁÒÐÀ×ÕÁÕÕÀÐÓÀÓÑ½ÕÑÁÓÑÁÐÒ¼ÎÊ¹ÎÀ´Ã¼¥ºª{rbr]|qb{i~i{iinr|l{dtbngududodq[~o`zo]~o_|qd|td{bzxb{ndknwurw§¶¡¯²µ¦«|~trn|_ub{ffinkgkkioqu| ²¥Ã¬Ù«·å³Áå³Ãà¶Ãæ¬Æß¬ÂÞ®Åà³Âä±ÅÓ©ÀÊ ·Ë¶Ã³¸¬²¦§¥£{zuxtwuw¦|¥| «¡½¬³¥¦£¡{{¡{§¤~t{uuuutouroqlii|izg{izk~kwg~gzk{fkkokiwg{k{i|ng~dwfxnxuk~bll~kt`|nbq`|k`wfbqf]ug_xn`rufzl_{ibu£¿±¹Ç¹ÃÍ·ÈÎ¸ÊÐÀÒÑÀÕÎ¿ÒÓÁÓÓÀÔÓÅÓÒÄÕÔ¼ÔÒ¿ÓÐÀÕÑÁÒÒÁÒÓ¿ÒÓÀÕÐÀÒÐ¿ÑÎ¾ÒÓ»ÔÒÀÓÎ¿ÒÕÀÕÒÁÐÒÀÖÒ¾ÒÑ½ÐÎÁÓÎ¿ÒÍ¾ÒÐÀÔÒÂÒÌ¾ÎÐÀÍÐ¾ÕÎ¾ÑÎ¾ÎÎ¿ÐÏ¾ÐÐ¹ÑÍ¼ÒÎ¿ÎÌ¿ÐÍ¼ÑÒ¿ÐÎ¼ÎÐ»ÍÌ¼ÓË¼ÎÌ¿ÒÐ½ÐÍ¼ÐÐ»ÐÎ»ÐÍ¾ÎÌ¾ÎÌ¹ÎÎ»ÐÌ¼ÎÌ»ÍÌ»ÌÌ¾ËÍ»ÏÍ»ÐÌ¼ÍÐºÐÎ»ÐÎ¿ÎÎ¾ÐÒ¾ÑÏ¾ÐÐ¿ÎÍ¹ÐÌ¾ÐÑ¿ÐÏ¾ÐË¾ÎÑ¾ÐÎ¾ÑÎ¾ÐÍ¾ÓÍºÍÐ¼ÍË¾ÏÎ»ÏÌ»ÐÐ¼ÐÍ¿ÌÊ¿ÌË½ÌÌ»ÊÌ»ÎËºÌË»ÎÊ¼ÍË»ÌÌºÊËºËÊ¹ÊÊºÊÉ·ÌÇ·ÈÆ»ËË·ÌÈ·ËÈºÈÉ¶ËÊºÊÇ¹ÊÉ³ÌÈ¸ÌÈ»ÈÆ¹ÌÈ´ÆÇ¸ÇÈ·ÈÆ¶ÊÆ·ÊÈ»ÉÆ¶ÊÅ¸ÉÆµÈÈ·ÊÅ¹ÉÅ·ÉÃ³ÈÇ¶ÈÃ¸ÈÇ¶ÈÃµÅÃ·ÇÆ²ÈÃµÅÄ¶ÈÆ·ÆÃ³ÆÃ·ÅÁ´ÆÂ³ÇÄ³ÄÀ²ÇÃ²ÄÁ³ÅÃ³ÅÂ³ÅÁ³ÄÁ³ÆÃ´È¿²ÃÁ´ÇÃ±ÅÃ²ÇÂ´ÆÁ´ÇÁ³Ä¿·Ã¾³ÃÂ°ÂÀ³ÂÃ²ÃÀ°Å¿³Â¿³ÃÃµÅ¿³ÅÁ²ÃÁ±Ã¿±Á¾®ÂÀ°ÆÀµÄÃ²Ã¾³Â¼³ÄÂ±ÃÀ°ÅÀ°ÂÁ³Ã¿³È¿²Á¾®ÁÁ³Á¿®¾ÁµÂ»®Â¼°Á¾¯À¼­ÁÀªÀ¾®¿»¯À»­¾¼°¾½¬Â¿¯¾½­Á»¬¾½®¾¿®Á»®Áº«¿¸®¿¼±¾»¬Á¾¬¿»¬¼¼¬¾½¬¼»¬»¸±½»¬¿¸¬»º¬¿·©¼¹«º¹ª¾¼§»®¥²´¡¹³¤»·©½·§»¹§»µ¦»¹¦¼·£ºµ¦¼·©½·¬½»¥»´©¼·©¿¹¬¼·¤»·§»»¨½¶©¾·©½¸§¾µª¼·§½µ©¼¸¨¾ºªÀ·®¼¹§»»©»º¥»º¬¾»¨¿º©½º©¾º«Ä»¬¿»§¾·­½½£Á¸ª¾»¨Á»ª¾»©¾¹¬¾¹§¾¹§½»ª¿»¨¾»¨¿»¬¼»©Á½¨¾»¬¿»«Á½¬¿»ªÁ¼­Á¼¬Ã»¯¿½²Ã¿¬À»¬¾¼­Ã¾¬À»­Á¼¬Ã¾®Á¾­Ã½¯Á¾ªÆ¾«Ã½±Â¾­Á¾®ÃÁ°ÀÁ±Ä¾®Ã¿¬ÂÂ²Ã¾¯ÃÁ¬Ä¾°ÆÁ±Ä¾±Å¾°ÄÀ²Æ¾¯ÁÁ­Æ¾°Ä¼°ÅÂ°ÃÃ®ÆÀ®Æ¾°Ä¿±ÄÃ­Ç¿¯ÆÀ±Ä¿¯Ä¿³ÆÁ¯ÃÃ®Ã¿±ÃÄ±Ê¿²ÆÂ±ÃÃ´ÆÃ±ÈÂ¯ÆÁ°ÆÃ¯ÇÃ³ÆÀ°ÄÃ³ÆÁ°ÈÃ³ÇÃ²ÈÂ¯ÄÁ³ÈÃ³ÉÅ±ÈÃ´ÈÄ´ÉÆ³ÊÇ´ÊÅµÊÈ±ÇÃ³ÈÃµÉÆ³ÊÆ¶ÊÆ¶ÌÆ³ÊÅ¶ÉÄ·ÉÅ³ÊÆ·ÊÈµÉÆ·ËÆµÈÅ¶ÆÇ¶ÊÄ´ËÇ·ËÇµÈÅµËÆ´ÉÊ·ÍÈµÊÆµÊÈ´ËÇ·ËÆ¶ÉÊ³ÊÉ·ÌÇ¶ÊÇ´ÊÈ¶ËÈµÌÊ³ÌÊ¶ÎÇ·ÌÈ¹ÌÊ¶ÏÇ·ÌÆ·ÊÈ¶ÌÇ¸ÎÇ´ÊÄµÊÇµÌÇ·ÌÈ¸ÌÉ¶ËÈ´ËÇ³ÍÈ·ÍÈ·ÌÈ·ÏÇ·ÍÇ·ÍÈ¶ÎÇ·ÍÈ·ÎÈ»ÍÊµÎÈ¶ÍÉ¸ÎÊ·ÎÇ¹ÊÉ¸ÍÈºÎÊ·ÏÈ»ÏÌ¸ÏÌ¸ÏÆ¹ÌÈ¸ÎÌ³ÎÇ¹ÍÆ·ÎÊ·ÎÊ¹ÎÌ¸ÐÌ¸ÒÈ·ÌË¸ÎÌ¹ÎÊºÌÌ¹ÎÌºÍÍ¹ÎÉ¹ÏÍ¹ÒÌ¸ÐÊ·ÐÌ»ÌÉ¶ÎË¼ÏÍ¹ÎË¼ÎÌ»ÏÌ»ÎÌºÒÊºÊÌ»ÒÐ»ÑÌ»ÒÌ»ÐÎ½ÐÑºÎË¾ÎÊ¸ÐË¹ÍÍ¾ÒÏ¹ÐÌ¸ÎË¼ÏÎ¾ÐÎ½ÑÐ½ÑÎ¼ÏÑ»ÑÎ»ÓËºÒÏ»ÐÌºÐÌºÌÈµÌÊ¸ÌÇµÊÆ³È½®¿«²ndbW~gQwobt|]wq[xo]zxbzudx_zuf|lY~iYw{`zw_r_|t]zlYtiWwkYrgQxlOtl[ur_~wW{x]~w`~fnonnzqz§«©¥¡¥wuqkqf_x]x`~]zd{~[~_~`|dbfiii {®£Ä«Õ¥·á²Ãà³Àè¸Äò½Éó¼Ëì¶Êæ·Êí±Èç®ÄÚªÀÖ¡¸È´²­­«¯ ¬| £rnqkoklr|¥t¡|­¬¡´£©uqrrwuqutqokrloiontoodbbdfnto{ffz`xfudw[oY{t_zo[zr_znbzqYxnWztdwz_x_~q]wlg{~gft]|tb{~`{tb|nYx`YwiYql[u`Uq_Qo_Sk`Qld]qiWrfSuqd­¡«À¬·Æ¶ÂËºÆÊ¸ÌÌ¸ÍÎ¸ÐÉ¹ÎÍºÎÎ»ÎÏ½ÐËºÎË¸ÍÊ¶ÎÌ»ÎÍ¹ÎÌ·ÎÍ»ÎÌ»ÎÎ¾ËÉ¸ÑÌ½ÎÍ½ÍÊ»ÏÎ»ÎÊ¹ÌÌ»ÏÊ»ÒÌµÎÉ»ÌÌ½ÌË»ËÈ»ÌÊ»ÏË·ÍÊ¾ÎÉ¼ÍÈ¶ÊÈ¸ÌÊ·ÌÊ¸ÎÊ¹ÍÊ·ÉÊ¹ÊÈµËÆ·ÊÊ¸ÎÉ·ÉË»ÊÍ·ÊÊ»ÎÆ¸ÊÈ·ÎÊ¹ÊÊ·ÇÇ¸ÏÊ³ÌÇ¹ËÈ¶ËÊ·ÊÇ¶ÌÆ¹ÊÇ³ÊÈ·ÈÆµÊÅ¸ËÇ¸ÇË·ËÈ¶ÈÇºÊÎ·ÌÊºËÊ·ÌÊ»ËËºËÆ»ÎÉ¸ÉË»ËÈºÌÇ»ÊÊºÌÊ·ÌÈ·ÊÊ¼ÊÊ¶ÊÇ·ÊÈ¸ÌÆµÈÉ¹ÊÊµÈÈ´ÊÈ·ÇÄ¹ÇÇ·ÈÆµÊÆµÅÄµÌÆµÇÆµÊÆµÉÅµÉÃ²ÅÅµÇÆ®ÆÃ´ÅÁµÈÇ²ÉÅ¶ÆÅ´ÆÆ°ÈÁ·ÄÄ·ÈÃ³ÆÂµÃÃ³ÆÂ±ÊÃ³ÆÃ³ÄÃ­ÇÂ°ÅÁµÂÁ³ÄÁ­Ã¿°Ã¾²ÆÃ¯ÁÀ¯ÃÀ²ÄÁ¯Ã¾°ÄÃ³Ã¿°Ä»­Ä¾°ÃÃ°Ã½°ÃÁ¬Á¿®Á¾®Ã¼¯Ä¿®Ã¾¯Â»°¾¿®Ã¾±Ä½¬¿Á¬Ã»¬¿½¯¿¾²ÁÀ«Á¸¯Á¾®À½¬Á½­Â¾¬¿½«¾»®¾½¬À½¬¿»«½»¬¾»¬Á»®¾º­¾»«¿»®¾º­À»¬Á¼¬¾¼«Á»«¾½«½º®½»«¾¾«¾»ª¾º¬À¾¬À»­¾»®¾»¨¾¸­¾º«º·«Áµª¹·«¼¸ª½¶¨¸µ¬º¹¦¾¸ª»·§ºº§»·¬½¸©»·©»³ª¹·§½¸©¾·ªºµ¨¹¹¥½¸§¹¶«¸·ª»¹¢»¶¥º¶§º¶¥·µ©ºµ©·¶§»³¥¹³§¸·¥··¥·³¦¸µ¥¹µ¨º¾¯¾º©½¾«¼¿­À¾¬¿»¬Á»¬½½¬À¼¬Á¿ª¿»¬ÁÀ©À¼­À¾¯Ã¼¬Á¾«Ã¾«¿¿¬Á¾¬Á¼©Ã¾­Á½¬Å»¬Á½­Á½®ÂÁ°ÇÁ©Â¿®¾Á¯ÆÃ¬Ä¾­Á¿¯Â¾¬Á½®À¿³ÃÀ®ÄÁ°ÂÁ®ÀÂ®Ã½°ÁÀ³ÂÀ­À¾­Ã¿­ÅÁ®ÃÁ²ÄÂ¯ÁÁ³ÄÂ°Å¿²ÃÁ°ÃÃ¯ÃÃ®ÂÃ³ÆÀ°ÆÁ²ÃÃ¯ÃÁ°ÅÄ³ÂÁ³ÆÃ°ÇÂ³ÆÂ³ÅÅ­ÃÅ±ÆÁ³ÊÁ³Å¾°ÈÆ´ÅÃ³ÈÃ±ÇÃ³ÅÆ±ÈÄ²ÊÅ´ÆÅ´ÊÇ³ÈÅµÊÃµËÃ´ÈÅ±ÊÇ¶ÊÆ´ËÂ³ÈÃ·ÈÈ¶ÈÃµÆÇµÈÇ·ÊÄ·ÊÇµÊÅµÊÄ³ÅÉ¶ÌÆ³ÈÅµÈÆ²ÊÇ¹ÈÅ²ÊÅ·ÆÇ¶ÉÈµÊÆ¹ÊÆ¶ÉÈ¹ÌÈ´ËÉ¶ËÈ¶ËÆ·ËÉ·ÌÊºÍÆ·ÊÆ¶ÊÈ´ËÆ¸ÊÇµÌÈ·ÊÈµËÉ¹ËÌ·ÎÊ·ÌÈ»ËË¶ÏÈ¹ÎÊ»ÊË»ÒËµÊÌ¼ÌÊºÎÍ¹ÐÊ¹ÎÍ¼ÒÎ¸ÌÌºÎÍ¹ÍÊµÌË¹ÌÊ¾ÐË»ÒÌ»ÍË¹ÏÏ»ÌÊ·ÍËºÐÌ·ÎÌ¹ÏÊ¼ÌÎ¶ÎË¹ÏÍ»ÌÎºÎÊ¸ÌÌ·ÎÍºÏÌ¸ÐÊ¸ÌÌ¼ÒÍ»ÐÈ·ÐÎºÑÍ¼ÎÎ»ÐÌ½ÐÐ¹ÎÎ¼ÒÏ»ÒË»ÑÌ»ÐÍ¼ÑÊ¼ÏÎ·ÎÍ»ÐÌ»ÒË»ÐÍ½ÐÎ»ÐÍ·ÒÏ¾ÑÍºÒÍ»ÒÍ¼ÐÌ½ÑÍºÕÒºÎÍ½ÐÎ¾ÒÎ»ÒÌ½ÑÎ¹ÑÐ¾ÑÑ»ÒÏ½ÓÐ¼ÕÐ¿ÒÐ¾ÐÑ»ÒÒ½ÐÒ»ÓÎ¹ÒÎ¼ÔÎºÓÐ½ÓÒ¾ÒÎ»ÒÏ¼ÓÐ»ÐÐ¼ÒÐ½ÒÐ¾ÓÏ¾ÕÕ¾ÓÐ¼ÓÍ¿ÐÒ½ÕÒ¾ÔÎ»ÒÒ¿ÒÑ¼ÓÎÀÐÑ·ÓÐ½ÓÒÂÒÐÀÔÒ¾ÔÐ¿ÒÓ¾ÔÔÀÓÒÁÖÓ¿ÕÖÅÓÒÀÖÐÁÓÓÂÓÑÁÕÖÁÕÑ¾ÓÑÀÓÐÀÕÒ¿ÕÒ¿ÓÔ¿ÕÕ¿ÒÓÀÓÓÁØ×ÁÕÐ¿ÖÐ¿ÓÒ¾ÒÒ¼ÒÐ¾ÐÐºÌÌ»ÇÃ®¾©®{rbq[q`wzff~r`zuf~wfbknxfinqqqgzfxb~wdx]zd|f{inoq{zwrw~ |¥«°±ª¥|xxtonqkonkgqgnwx§{¬¢¸©ÆµØ¬¼í´Åî´ÌóÃÓúÈØúÌÖúÆÜúÃÚõÅÕø¿Òð¹Îâ¯ÇÑ¡ÁÇ·Æ¶É±¾­¹«¬|¥¨ ¦{§z ¥z§{¤xz¤¬¡«¡²¦¯§¯¦¯©¤¢ {{ xxzx¢¦¥~zzutx{|{¢{ rruunfz`x`ui{d~ubt_{u[zuf|wn|fb~{f~dzi|dd|ki{do`{o`|t`n`ro[wlgui[tidwu`zq`wqgx¨¥¾®²Ê¹ÃÍ½ÊÓ¾ÎÐ¼ÐÐÁÓÏ¾ÍÒÀÕÒ¾ÔÒÃÒÒÃÒÐ¿ÒÓÀÕÐÂÐÒ¾ÓÐ¼ÐÒÃÔÒÁÒÒÁÓÑ¾ÓÓÁÕÐÁÒÒÁÐÒÁÖÐ¿ÐÐ¿ÐÍ¾ÓÒ¾ÑÓÁÓÐ¿ÓÒÀÑÑÂÓÎÀÐÐ¼ÑÐ¿ÐÒ½ÑÒ¾ÒÏ½ÐÐÀÐÔ½ÓÐ¾ÐÌ¼ÑÎ½ÏÌ¼ÑÏÁÒÎ¿ÑË¼ÒÌ¼ÒÐ¼ÏÎºÎÌÁÎÏ»ÎÎºÎÏ»ÎÎ¼ÐÐ¾ÎÎ»ÐÍºÒÌ»ÎÍ»ÎÎ¾ÐÍºÏÌ¹ÊÎ»ÏÌ»ÎÌ»ÍÌ»ÐÐ¹ÎÎÀÑÐ¼ÐÑ¼ÎÒ½ÓÍ¿ÎÎ¼ÑÍ¿ÒÐ¾ÎÎÁÎÒ»ÏË¾ÐÐ¼ÐÎ¾ÏÌ»ÎÏ¾ÎÐºÏÏ¾ÒÍ½ÐÍ¹ÎËºÍÎ¾ÐÌ¹ËÌºÎÌ¾ÐÍ»ÍËºËÈ¹ÌÍ»ÏË»ËÉ»ÍÌ¸ÌËºÉÆ¹ËÌ¼ÊÈ³ËÆ»ËÊ»ÌÉ¸ËÉ»ÈÈ·ÊÊµÌÊ¹ÊÇºÎÌ·ÊÊ¹ÊÉ·ÉÅ·ÍÉºÈÊ·ÈÈµÉÄ¶ÇÊ·ÇÅ¶ÈÅ³ÆÄ´ÈÂµÊÆµÊÄµÈÆ¶ÆÇ³ÈÇ¶ÆÇ¶ÅÆ¶ÉÃ³ÆÆ³ÈÂ´ÇÂ³ÆÁ±ÊÂ³ÆÆ´ÄÁ²ÄÅ¶É¿¶ÆÁ³ÆÅ°ÈÂ³ÇÄ´ÅÂ´ÇÅ³ÅÁ´ÆÃ³ÆÃ±Å¿µÃÂ³ÇÀ´ÅÂ±ÆÁ´ÄÂ´ÃÀ²ÃÂ±Ä¾³ÆÁ³ÁÁ¯ÃÂ±ÄÁ±Á¿°Æ¿±ÅÀ³ÃÀµÂÃ²ÃÁ­ÂÄ³ÅÀ°ÁÁ®ÃÂ³ÅÁ¬ÃÁ­ÅÁ³Â¼°Ã¿®ÃÁ³Á¿±ÃÁ°Ã¿°Â½¯¾À¯¿½­Á½®¿¾¬À»¯Á¿²½¼¬¿·¬Ã¹¬¿¾¯À¼®Á¼¬Á¾®À¾­¾¾¯¾º¬¾½¬Á»­¿½­À»¬½º¯¼»¬Á»¬¼»¬»¼¬¾»«¾¹­¼»¬¾¹¬¾º©»·¬¼»«»º¬»¹«»º¨¼°§¶¶¦¼´¥»¸¥»»§»·¦½µ¨»¶©»¸¥··§¸´¤¸»ª½·©¼¸©»·£»»©¼»¨¼¶¦½·«½·ª»¸¥Àº©ºº¥»ºª¼º¦¿º©½»«¾»ªÁ¹§¾¶¦½·ª»º¨¿½«¹»©»¹¤½»ª¾»¬¿·«¾º§¾»¬½»«½¹ªÀ·ª¾º©¾º¬¼»§¾»§¿»­¾½®Á»«À¾ªÁ¼ª¿½¬Á»«Á¹¯¼½«À»¬Á¼­Â»¬Á¾¬Ã¾²Á¾¬Ã¾­À½¬Â¾­À»¬Á¾­¾¾ªÂ¿®Âº°Á¾¯Ã¾®Ä½¬Ã¾¬ÁÁ®Æ¾®ÃÀ®ÃÁ°ÅÃ®Â¿°ÂÂ°ÄÂ­Æ½­ÃÁ¯ÆÄ®ÄÁ°ÄÀ¬ÃÁ²ÃÁ±ÁÃ®ÆÀ²ÆÁ°Ä¿²ÅÀ®ÃÁ±ÃÁ´ÃÂ³ÇÁ°ÂÂ±ÃÄ³ÄÀ¯Æ¾°ÄÃ°ÈÅ³ÈÄ³ÅÁ°ÈÄ²ÆÄ²ÆÇ³ÇÆ±ÇÂ¯ÄÅ°ÇÃ±ÆÃ±ÆÂ²ÈÇ³ÇÁ°ÅÁ²ÇÆ±ÆÄ³ÆÈ³ÇÆ²ÉÄ³ÇÆ²ÈÇµÈÇ´ÈÅ·ÊÈ²ÊÄ²ÈÅ¶ÈÇµÉÊµÊÄ³ÈÆµÈÇ³ÊÆµÈÅ¸ÉÆ³ÊÈ´ÊÆ·ËÈ±ÌÂ³ËÆ¶ÊÈ´ÊÇµËÇ·ÈÊ²ÉÄ´ÇÆ¸ÊÇ±ÊÊµÉÄ¶ÊÊ³ËÃ´ÌÆ³ËÈµÊÇ³ËÉ¸ÈÉµÊÈµÉÈ¸ÌÉ¸ÎÊ¸ÊÊµÊÈ·ÌÆµÌÉ·ÌÊ¸ËÈ·ÌÆ·ÌÉ·ÌÈ·ÍÈ·ÊÊ·ÍÇ³ÌÊ¸ÌÇ·ÍÊ´ÎÆ´ÊÈ·ÌÈ·ÏÉ¶ËÊ·ÊÊ¸ËÇ´ÎÊ·ËÈ·ÎÌ·ÌÈ¹ÏÆ»ÊË·ÌÊºÎË·ÌÊ¸ÎÊµÐÊ¸ËÉºÎË¶ÍÈ·ÎÈ·ÎÊºÌÈ»ÌÌ·ÌÈ·ÌÊ¼ÐÌ·ÎË»ÍÌ¸ÏÊ·ÎË¸ÏÉ»ÑÎ»ÏÌ»ÏÊ¸ÏÌ¹ÐË·ÐÎ»ÎË¸ÎË·ÌÌ»ÏÊ·ÍÌ·ÍÊ½ÎÎºÏÎºÒÏ·ÎÎ»ÎÏ»ÑÎºÑÌ½ÎÌ»ÑÐºÐÑ¾ÏÎ½ÏÌ·ËÌ»ÏÐ»ÓÎºÐÍ½ÎÎ¼ÑÐ¾ÑÎºÏÍ·ÐÎ¾ÐÏ»ÎÎ¾ÑÌ¼ÎÎ¼ÐÎ¹ÎÍ»ÍÎºÏÈ·ÉÃ¯Á±¡µ¤qlfU|dSufWr~`zr]{iWukQudWwt`ndwd~duf~nibq]|q]~t`{t`z`zzYzddfnrtuuxwtoqrqnz{xwonnklnnkliglkgknn£t¦²| ¹¨»©Ä³Ô§»æ®Äî²Ëõ¾ÑúÅØúÑàúÎàúÃØú¾Ö÷»Òæ¸Òâ®Çà£ÃÚ¢ÂÍ¹ÊµÆ²Â°½®¯ª®£²¦®¡¬¡«z§w¦|¨¡¬ª¡­¡­~§z¢|xz|z¤«~¡¡ £|xookkqt~ ~£«®¡z|xtiqnng_q[|tYzlYxnYtq]wqUwkYtiUuq`zwfz`{tb|`ztb{`z_zb~z`t_|r`{rYzk[tg]oiUt`Uo`QokWqg[wgYwld~¬ ¥¾²»Î·ÆÌºÉÍºÊËºÎÌ¸ÏÊ·ÎÏ¾ÌÎ»ÏÌ»ÏÍºÒÌ»ÏÊ¹ÎÎ¾ÏÍ¹ËÎºÎÍ¼ÏÎ¼ÎÊ»ËÌ½ÎÌ½ÎÍ»ÍÌ»ËÐºÐÊ»ËÉºÌÊ¸ÎÌ»ÍÌ¾ÌÊ¸ÐËµÌÎ¹ÎÊ¸ÌÍ¼ÌÉºÎÊºËË·ÎÉºÊÌ¹ÎÊ¶ÌÌºÌÉ·ÊÌºÌÊ¹ÊÌºÌÊ·ÌÊ¸ÊÊ¹ÌÉ¹ÍÊ·ÊÈ»ÌÊ¸ÊÉºËÇ¸ÊËµÊÈµÉÉ¹ÈÆ·ÉÉ¸ÊÈµÊÊºÌÈ·ÇÉµÆÉµËÊ¶ÌÇ¹ÌÉ¶ÊÈ¸ÌÈ»ÎÊ¸ÊÊ·ÎÊºËÌ¸ÌÊ¸ÌÅµÈÊºÌÊ»ÌÊ¶ÊÉ¸ÊÇ¸ÌÌ·ÌÈ¹ÉÈµÊÉ´ÊÈµÊÈ¹ÉÈ·ÊÈ·ÉÈ¸ÇÊµÊÆºÆÇ³ÈÈ¶ÇÅ·ÈÆ·ÊÆ³ÈÇ·ÈÃµÈÆ²ÈÅ³ÇÁ·ÆÈµÈÄµÈÄµÆÅ³ÆÆµÆÈ²ÈÅµÈÆ°ÆÂ¶ÇÁ²ÈÃ°ÆÃ³ÆÃ³ÇÁ°ÆÀ±ÃÃ²ÃÁ²ÄÁ°ÄÃ³ÅÂ²ÆÁ±ÃÂ±Â¿²ÆÃ°Â¿²ÅÁ°Å¾¯ÃÁ°ÃÀ°Ã¾¯ÃÀ±ÃÂ±Ã¿²¿¾­Ä»®Á¾®ÃÀ®Â¾²ÁÀ¬Á¾²ÄÀ°Â½«Á¾°ÁÀ°ÁÀ¬ÃÁ¯¿¾°ÂÀ¬Á»°¿»­Ã¼¬½¾­Á½¬Á»®ÂÀ­Á½¬Á¼¯¾¾ª¿»«¾»®¾½¬¿½©½¼®Á½¬Àº­¾¼­¾»¬Â»«¾¹¬À¾«¿º­¾¾°À¼¬¾»­¼½¬¿¾®¾º¬¿·¬½·ª½º©Á¹ª¾º¬¾¸ª½·¨»»¬»º«½´«¿ºª»¹«½¸ª»¸¥½¹«½¸¦»¹©º·§»·ª¾´§»»ª½¶©º´ª»¹§·µ¨»´¥¹¸¨»·§»°§¸¶¨·µ¦¸µª¸µ©»¶¡·´¦µ³§º¶£»²£¸·§ºµ©»½­¿¾¨½º¬Á¾¬¾¾°ÂÁ¬¿ÀªÀ¾©Á¼¬À¿¬Á½«À¼¬À½¬¾Á¬Ã¾¬¿À«Â½¬Ã¿¬À¾¬¾¾­ÁÀ¬ÁÁ¬Á¼®ÀÁ­ÅÀ¯ÂÁ³ÂÁ®ÁÀ®¾¾­ÃÁ¯À¿¬Ã»¬ÀÃ±ÅÁ¯Â¾¬ÁÀ°À¿¯Ã¿­ÂÀ®ÁÂ­Ã¿­ÂÀ°Ã¿¬Ä¾°À¿³ÅÂ­ÄÁ¯ÃÀ°ÆÃ¯ÃÂ´ÃÃ®ÆÄ®Ä¿³ÃÁ¯ÄÂ¯ÆÀ¯ÃÃ±ÅÃ±ÃÂ®ÃÁ²ÃÅ±ÆÅ°ÆÁ¯ÁÁ´ÆÂ±ÇÂ±ÃÃ³ÇÅ°Å¿´ÃÁ´ÆÄ°ÈÂ²ÇÅ´ÈÆ´ÆÃ¹ÆÃ³ÆÈ³ÈÆ³ÆÅ´ÇÅ³ÇÇ·ÈÅ³ÆÆ³ÈÅ¶ÆÂµÈÆ°ÈÇ³ÉÆ´ÈÈµÉÆµËÈµÇÂ´ÆÇ³ËÇ¶ËÇ¶ÊÇ³ÌÈ³ÆÈºÅÇ³ÊÃ²ÆÇ¸ÈÆ·ÊÇ±ÉË¹ÊË¸ÌÇ¹ËÆ´ÊÈµÊÌ¸ÊÈµÈÉ·ÊÈ´ÌÇµÊÆµËÊ¶ÊÈµÇÈµÌÊ´ÊÊ´ÊÈ¸ÈÊ³ÍÌ¹ÌÈ¸ÌÆ¹ÍÊ¸ÊÌ¹ÐÍ¶ÎÈºËÈ»ÍÍ»ÎÊ·ÐÈ¸ÌË·ÍÍ¸ÌÊ·ÍÊ½ÎÎ¸ÎÌ»ÐËºÎË»ÐÊ¹ÎÍ¸ÍÌ¸ÍÍ»ÎÏ¹ÐÌºÎÊ·ÌÌ¸ÏÍ·ÎË»ÑÊ»ÐË¸ÏÌ»ÏÌ»ÏÌ¹ÐÊ¸ÐÌ·ÎÍ¹ÐÊ·ÍÍ½ÑÎ¹ÒÏ»ÎÎ»ÐÍ¼ÏÒ»ÓÌ½ÏÑ»ÏÎ»ÑÏ»ÐÐ»ÐÎ¹ÎÍ¶ÐÑ¾ÓÎ»ÓÍ½ÐÌ»ÏÐ¹ÐÍ¼ÏÌ¾ÐÎ¹ÒÒ¼ÐÒ¸ÐÎ¹ÒÌ»ÑÍ»ÒÐºÏÎºÎÊ»ÑÐ»ÐÒ»ÔÐºÒÎ¼ÏÎ»ÒÑ½ÐÎºÐÒ¼ÒÐ¾ÒÐ¼ÐÐºÒÎ»ÒÑºÐÔ¿ÑÎ»ÓÐÀÓÒ½ÒÐ»ÑÎ¼ÒÒ¼ÓÐ¾ÕÓ¿ÔÑ¾ÒÑ¹ÐÑ¼ÏÓ¿ÓÎ¾ÐÒ¿ÑÎ½ÔÔ½ÓÐÀÓÐ»ÑÓ½ÒÓ½ÑÓÁÓÓÁÕÒ¿ÕÐ¾ÕÓ¿ÒÕÁÕÓÁÑÕÁÕÕ¾ÖÖÁÓÓ»×Ñ¿ÓÐÀÑÐ½ÕÓÁÔÒÀÓÓ¾ÕÕ¿ÖÓÂ×ÒÁÖÕ¾ÒÑ¾ÒÕÂÓÔÁÓÓ¿ÓÒÁÓÕÀÓÏ½ÍË³Ë½¬¼£®{riiY|i[zxd|b|ubt_|q_o`{kotoik~g|b~b{b|b~fqilrqnxuw||ª©§¡wtnknnqtnqrkonrotqrxu¡u¤{¤¤{«¤¼¨Â°Ê³Ö£¼Ü¦Âã¬ÄîµÎö»ÕúËÝúÙãúÛêúÝçúÓèúÊãú¾Úò¾Ö÷¼Óó¶Óë¯Êç©Êà§ÈÙ¦ÂÑ¢¿Ù¾Ò¿Ò¼Ç¸Æ³Ã±º®¶ª³§±ª±¨±¦³¦ª£©°¡¶¤³±®© ¨~§¤|£~¤¢¢xwzrtuqxwx£{{uqiillrglf|b|`zf{zbt`|o`|r`wtbzzni|nkdilk~i~zixd{dq_zn_ui]xdWqq`wobzi]{ob|l¤¹¬·Ì»ÅÐºÌÐ¾ÐÒ¾ÐÐ¾ÐÒ¾ÒÕÂÕÓ¾ÔÒ¿ÑÐÀÓÒ¿ÒÕ¾ÓÏ¾ÓÓ¾ÓÔ¿ÑÓÀÕÒÁÒÒÀÐÒÃÑÒ¼ÔÓ»ÓÐÀÑÓ¿ÔÒÀÒÏ¾ÐÐÀÒÑ¾ÎÒÁÕÎ»ÐÐ¾ÎÐÀÓÐ¾ÐÕÀÐÎ¾ÓÑÀÒÑ¼ÐÐ¼ÓÒÁÓÒ¾ÑÏ¼ÏÐºÑÒ¾ÓÐÀÐÏ¿ÑÐÀÒÐÀÐÐÀÑÎÀÏÐ»ÎÒ½ÒÒ¾ÒÌ¾ÐÎ»ÐÑ¾ÎÐ¾ÏÎ¹ÍÎºÐÍ»ÐÐ¿ÎÏ»ÎÍºÏÎ¾ÌÎ¼ÏÎ¼ÌÎ¼ÏÐ¾ÎÏ¾ÑÐ¾ÐÎÁÑÑ½ÑÐ¿ÏÐ¼ÎÍ½ÏÎ½ÐÎ½ÒÐ¼ÐÎ½ÐÒ¿ÐÐ¼ÐÒ½ÐÌ»ÍÐ½ÍÍ¾ÎÐ½ÎÌ¼ÐÎ¾ÎÌ¾ÎÍºÌÌºÎÍ¾ÑÌ»ÐÎ·ÌÊ¹ÎÌ¹ÌÍ¸ÌÇºÍÊ¹ÌÎ·ÊË»ÎÊ»ÊÊºÌÉ»ËÊ»ÊÊ·ÍÈ¸ÌÊ¹ÉË¸ÎÉ³ÊÈºÈÊ¶ÍÇ·ÈÈ·ÈÇ·ÈÆ¹ËÊ´ÆÊ·ÉÊ¶ÈÆ¶ÈÇ¹ÊÈ¶ÇÈ³ÆÉ¶ÈÇµÇÄ³ÉÆ³ÅÆµÈÆ³ÈÅ·ÉÅµÄÇ³ÆÆ³ÊÆ¶ÆÃ³ÄÅ°ÇÁ¶ÅÆ³ÄÂ¯ÈÅ¶ÆÆ³ÇÃ³ÅÅ³ÆÃ³ÅÃ¶ÃÅµÆÆ³ÄÄ´ÃÅ³ÄÂ¯ÅÀ³ÂÆ³ÆÁ±ÆÂ¯ÂÁ³ÅÃ³ÅÃ­ÅÁ±ÅÂ³ÄÁ¯ÂÃ°ÅÅ³ÅÁ±ÁÁ´ÄÂ°ÃÃ®Â¾³Á¾³ÁÃ³Å¾®Â¾´ÂÂ±Á¾°ÃÀ³ÁÁ°Á¾°Â¾³ÁÁ°ÇÁ¯¿¾°Á¿±ÃÁ­¾¾±ÁÀ²ÂÁ®ÂÀ¬À½­À¾¬Á½°¾¾­Â½®¾¾¬½¿¬¿¿³Á¼¬¾À¯¾¸¬¾½¬½»¬À½°À¼­¾»¬½»®½½«¾¹­»¼­À¼¬½»«¾¼­¾»¬º¼©½»®¼½©¼º«¸¹«»º¬¼·­»º§¼²¥¶µ¥·¸¤»ºª»·¦¹º¨·¸¦º¸©¼¶¨¼·¨»¹¨»¸¬¾¸¨¼µ§¼¶§»·©»»¨À¶ª¼»«¼ºª½¹ª»¸¨¾ºª¾·«»º«¼¸¨»º­½ºªº»«¾·ª¼·§¾»¨¾º©¾¸«¾»«½»¬»º®¿½©Àº¬¿»§¿»¨Àº§¼¹§¼»­Á½«¼ºª¾½«À¼ªÁ·¬À¾ªÀ¿«¿»¬½À®Â¿«Á»©¿¾®À¾­À½©Á½®¾¾­Ä»«À»®¾¾¬ÁÁ®Â¾©Ã½¯Ã»ªÀ¾®Â¾­Á¾®Â¾°ÃÃ­Ã¾¬Ä»­Ã¾­ÅÀ³ÆÁ°ÀÁ®ÃÁ³Ã¾­ÄÁ³Ä¾­ÃÀ®ÄÁ­Ã¿³ÂÁ¯ÃÀ®ÁÂ´Ç¿¬ÄÂ³Æ¿°ÇÃ³ÇÃ³Ã¾®ÄÁ³ÃÁ±ÃÁ°ÆÁ¬ÂÀ³ÇÃ±ÅÃ¬ÈÂ°ÆÃ²ÇÁ³ËÅ³ÈÀ´ÆÃµÇÆ°ÅÆ±ÆÆ²ÄÃ²ÆÃ²ÆÃ±ÆÃ²ÆÆ°ÇÄ¶ÊÃ³ÇÂ³ÆÃ¶ÈÇ¶ÅÄ³ÉÄ³ÊÇ³ÇÆ±ÈÆ´ÈÅ±ÉÆ´ÈÂ³ÈÆ²ÇÆµÊÅµÇÈ´ÊÆ´ÇÆ´ÊÈµËÄµÈÇµÊÄ³ÈÇµËÇ¹ÉÇµÊÄµÉÆµÆÄ²ÌÅ´ÊÆ¶ÇÇµÊÈ¶ÍÄ¸ËÈ´ÌÅ¶ÊÇ¸ÊÇ¶ÍÊ¶ÌÈ³ÊÆ¹ÌÈ·ÊÇ³ÊÊ·ÊÊ·ËÊ·ËÅ¸ÈÇ¶ÌÈ·ÌÈ¸ÏÈ·ÌÇµÌÆ·ÌÇµÊÊµÌÆ³ÊÊ¸ÌÉ¸ÌÇ¼ÌË·ÌÆ¶ÎÇ¸ÌÈµÍÈ·ÎÊ·ÌÉ·ÌÉµÌÆ·ÍÊµÎÊ·ÍÈ·ÌÈ¸ÎË¶ÌÉ³ÎÄ·ÌÊ¹ÌÈ·ÌÊµÏÈ·ÎÊµÏÌ¶ÌÉºÎÈ¶ÍÉ»ÏÊ·ÏÊ·ÍË»ËÊ¹ÎÌ»ÐÈ·ÎÈ·ÍÌ·ÎÈ»ÌË½ÐÌ»ÐÌ¸ÐÇ·ÌË¹ÏÌºÌÊ»ËÌ¸ÓÍ¹ÏÈ¸ÐÊ¸ÏË·ÍË»ÎÊ·ÏÍºÏÊºÍÌ½ÒÎ·ÒÎ½ÐÍºÑÎ½ÒÌºÐË¼ÒÒ¾ÓË¼ÐÎºÑÎ»ÎÐ¹ÎÎ»ÎÎºÑÎ»ÐÍ¼ÏÑ½ÑÎ»ÒÍ¾ÎÐ»ÐÒ½ÏÐ¼ÑÐ»ÏÏ»ÏÊ¼ÎÎºÎÊ¸Ç¾°Á²µ¡tff[|bOq`Wqn]rzb|r]wk[{fUzlYwrd{nixfu]|lY{q]xw_z]zrb|ugdnnfnktwrqnr¥zutifdggdfgfgddkuorqrtq |­£´¢¸ª·©Ã¬ÌºÔ¥»á©Áé«Èô¶ÐøÀÓúÊÙúÌäúÚåúÞëúØéúÔçúÉáúÃÜúÁØù¾Ùó¸Ôì³Îé¬Ìá®ÊäªÇã®Êè«Éà¨ÃØ£ÃÓ½Ò»Ë·ÃµÂµ·¬´ªµ§®§¦¤¤{¡u¦ª«¥{¦|zxooqqolqlkknrookqqqlqkkg{_x]||]z]|x`w_|tWxnYwq[xqYzn]tnYrkUwgQngUogQrf]rwd{d{i|l|bzgk|gt`~r`wq_xr_wl]xbUq`OrgUnnSqgWnfSuiY~¸§°Ä°»Ë¶ÃÈ¹ÉÎºÏÎ»ÌÊ»ÏÏ½ÐÌ»ÐÊ»ÎÐ¸ÏÎ¾ÍÎ¼ÎÎ»ÓÎ½ÏÎ»ÎÍ¼ÌÎ¿ÎÌ½ÎÌ»ÏÏ»ÐÌ·ÏÊ»ÍÉ»ÎÌ»ÎÊºÊË¸ÎÍºÏÌ½ÍÈ¹ËÌ»ËÊ¸ÊÍ»ÏÏ»ÎÊ¸ÍË½ÌÌ¸ÎÏ¹ÌÌºÎÌ¸ÌÐºÍÌºËÌ¸ÊÌ·ÍËºÐÉ»ÎÌ¼ÎÈ¹ÏÌ»ËÍ¸ÊÊ»ÌÍ·ÍÌ¹ÐÈ¸ËË¼ÌÊ·ÊÌ»ÊÌ¼ÎÊ¸ÌÈ¹ÎÊ¶ËÉ·ÌÉ¸ÌÇ»ÌË¸ÊÈ¹ÌÌ¹ÌÊ¸ÎÌ»ËÍ½ÎÊ·ÉÌ»ÎÊ·ËÈ¸ËÊ¹ÉÈ·ÊÊ·ËÌ»ÌÇ·ÍÈ·ÊÊ¼ÌÊ¸ËÆ»ÈÊ¸ÊÇ»ÊÆ¶ÌÇ¸ÉÈ·ÊÈ·ÊÉ·ÊÆ¶ÊÉ·ÇÇ·ÊÅµÈÆµÆÈ·ÈÈ³ÈÆ´ÈÆ´ÈÃ¯ÊÆ±ÆÆ·ÆÆµÊÆµÇÆ·ÅÃ²ÆÄ¶ÆÁ³ÅÄµÆÅ³ÆÁ²ÃÃ´ÅÃ³ÄÂ´ÇÆ´ÈÁ³ÆÃ³ÇÄ³ÄÁ²ÄÄ³ÃÁ²Ç¾³ÃÃ°ÃÁ²ÃÁ°Ã¾¯ÁÃ°Å¿±ÃÁ®ÃÃ°ÃÂ³ÆÁµÃ¿¯ÂÀ¬ÁÀ¯Á½°Ã¿­Á¾¯¿¾¯ÁÁ¯ÃÀ­¿¾®ÁÁ²Ã»¬Á¾¯ÂÁ²Á¾°Ã½­¿¿®¾¿¬¿¾¯Á½«¾¼°Á½®¾º¬¿¼¬¾¾®¿»¬¿º°½»®¾¾­¿¾¬¿½°¾¼­¾¾¯Ã»­¿¾®¾»¬¿¾¬À¾¬À¾«Á»ªÁ¸­½¼¬¼¿«¾º²¿½«¾»®¾»¨½¹«¾»¬¾»©»º¬¾»«¾»¨»·ªÀº©»¶ª»¸¬»»ª½·©º·©»¸©¼º§½¶¤»¸©¹¸§»¶©¾¸¨»´¦¸¸«»¶§¹·¦¹·©»´¨·¸©¼¶§¸µ¨··ª»²§·µ§¹¶§·³¨¹³«¸´¥·¶¢¸·¦»²§¹»¬¾»¬¾»«¿½«¼¼¬¿½©¿¾¬Á¼¨»¾®Â¿ªÁ¾¬Á¾¬Ã»¬Á½«À¿¯ÀÁ¯Ã¼¬Á¾­Â¼­½¾¬¼Â¯¿¿ªÂ¾¬À¿¬ÄÁ¯ÁÅ³ÂÀ­ÁÃ¬Á¾¬ÂÁ°ÀÁ±Á½¬¿Á®ÃÁ³ÁÀ¯¿Â³Ã¿®ÂÁ«ÀÁ±ÂÃ­ÃÁ­ÅÀ°ÃÁ®ÅÀ«ÁÁ°ÃÀ­ÆÅ®À¿¬ÆÁ¯ÄÄ°ÃÀ±ÆÃ®ÄÄ¯ÃÁ°ÄÂ±ÂÁ¬ÄÃ³ÆÃ¬ÆÂ±ÆÁ¬ÃÄ²ÄÃ³ÅÂ³ÂÃ²ÇÁ³ÅÁ´ÇÃ­ÅÃ¯ÆÃ±ÆÃ³ÈÆµÈÂ®ÈÆ´ÆÄ²ÊÃ´ÈÅ°ÇÅ³ÈÆ³ÈÃµÅÅ¶ÈÈ²ÇÇ´ÇÄµÉÆ³ÇÆ³ÊÆµÉÇ¶ÊÂ³ÈÆ¶ÇÆ³ÈÅµÆÊ´ÉÉ³ÌÈ¶ÈÆ·ÇÈ·ÊÈµÊÅ·ËÇ¶ÉÊ´ÌÆ³ÇÆµÉÈ¹ÌÆµÇÇ¶ÌÊ¹ÌÊ´ÉÇ·ÌÇ¹ËÈ¸ÊÊ¶ËË¸ÍÈ¶ÎÈ¶ÊÆ·ÌÇ¶ÊÉ¹ÊÈ´ËÌ³ËÈ·ÊÊ·ÌË¸ÌÊ¶ÌÌ¹ËË·ÌÌ¸ÌÊ¶ÌÌ¶ÏÊºËËºÎÌ¶ÌÌ·ÐË¾ÌÈ»ÎË¹ÌÈºËÊ¸ÍÌ¹ÐËºÊÊ¸ÎÊ¹ÌËºÐÊ·ÌË·ÍÌ»ËÌ¹ÏÑ»ÍÊ¹ÎÐ·ÐÌºÐÐ·ÎÌ·ÎÌ»ÌÍ¹ÏÊ¸ÌÌ»ÍÌ¹ÍÌºÎÐ·ÎÎ¼ÏË»ÎÎ»ÑÍ»ÎÎ·ÌÑ¾ÒÐ·ÏÌ¹ÎÏºÎÌ¹ÎÎ¼ÎÎ·ÐÍ»ÒÐ¼ÐÐºÏÍ¾ÎÌ¸ÑÑ½ÐÐ¼ÑÍ»ÒÌ»ÑÏºÒÎ¹ÑÎ¼ÐÒ»ÖÎ»ÐÎ»ÒÍ·ÏÏ½ÓÒ½ÒÎ¾ÓÍ»ÒÎ·ÒÒ¼ÒÒ½ÕÐ½ÕÍ½ÐÓ¼ÒÏ½ÒÒ»ÒÐ¹ÑÌ¾ÒÑ¼ÓÒ»ÒÌ¹ÒÐ·ÐÓ¼ÓÐ¿ÐÓÀÒÒÁÓÎ»ÔÑ¸ÐÒ½ÒÓ¾ÓÓ¿ÑÑ»ÕÑ½ÒÒ¿ÒÓÀÓÒ½ÒÎ¿ÑÐ¼ÔÑ¾ÓÎ¿ÔÐ½ÓÒ½ÏÕÀÓÕÁÖÑ¿ÑÓ¿ÒÑÂÒÖ¼ÒÑ¾ÓÓÁÓÕ¿ÓÓ½ÒÔÀÒÓ¿ÖÑ¾ÖÒÁÒÓ¼ÓÒ¿×ÕÁÑÕÁÓÕ¾ÓÓÂÔÒ½ÔÒ¾ÒÓ¾ÎÒ¼ÎÌ¶Ì¾¬¾²¡²|klbgUwl_zrb{b`~xf~|b~ioon{n~`zggiiiintngkknknotz§~§¥¥|ttrlokkooquw¤u¢z¤~ ª¡ª~¯¢³¨¸¬°¦¬©»­Ì³Ñ¡»Ñ»ÚªÁæ¨Éí³Ìñ½ÑúÇØúÑÞúÒáúÙéúÞîúãïúäóúÝóúÚîúÒìúÊéúÇãúÂàúÀßúºàù»Ùú»Ûú»ÖúÁÓú¼Øú¸Ø÷»Öñ²Òè¬Ëä¤ÉÛ¡ÁÙ¢ÄÕ½Ð¼Å·¿±¹¬µª°§©¢¬{£¢|¢~ § ©¡¬®~©z§u¤w x£{­ §~~¡{wzwqqrttrifigbd`z]z{bd{]|t_u_u_zof{w_xx`zu_ut]xlWunY|tYxgotlnorg~fzi_o_|ofzdYzk[on]|o]to]ur_u«¨¾®¶Ë·¿Î¿ÌÐÂÐÓ¾ÓÒÁÐ×ÃÖÒ¿ÒÒ¿ÏÖ¿ÒÔÀÒÒÁÒÓÀÒÖÀÕÑÀÓÔ½ÏÓÀÕÕÁÒÔÃÖÒ¾ÒÔ¾ÒÓÀÑÐ¿ÐÒ»ÓÐÀÑÒ¿ÑÓ¾ÕÒ½ÒÐÁÎÐ¾ÒÐ¿ÐÐÂÒÓ¿ÑÒ¿ÏÐ¾ÑÒ¼ÒÒ¿ÒÐÁÑÒ¾ÒÔ¾ÓÐ¼ÑÓ¾ÒÓ»ÒÑ¾ÒÒ¾ÒÒÀÓÔÁÑÒ¾ÐÒ½ÎÒÁÎÑ¿ÓÐ»ÏÎ¿ÐÐ¿ÒÒ»ÐÒ¼ÐÎ¿ÏÐÁÏÒ¾ÒÐ¾ÎÐ¾ÐÐ¼ÎÒ½ÏÎºÐÎ½ÎÍ¾ÒÒÁÎÒ¿ÐÎÁÒÒ¿ÒÐ¿ÒÐ¾ÍÍ¿ÕÐ»ÓÑ¿ÍÐ¾ÐÎ¾ÏÐ¾ÐÓ¼ÏÎ¾ÏÐ¼ÍÎ¿ÑÐ»ÐÏ½ÍÌ½ÐÐ»ÐÐ½ÍÌ¿ÏË¹ÎÎ¼ÌÎ»ÌÍ¼ÐË»ÏÌ¹ÎÎ¼ÐË¸ÎÊºÎÌºÍËºÊÊ¼ÈÈ·ÌÊ·ÊÉ¹ÈÌ·ËÆ´ÉÊºÊÌ½ÌÌ·ËÈ·ÊÊ¹ÊÊºÊÈµÉÈ¸ÉÌ¸ÊÌ¹ËÈ¶ÌÈ·ÈÊ´ÈÊ²ÈÇ´ÈÆ·ÈÈµÈÃµËÆµÈÅ¶ÃÇ¶ÇÇ·ÈÆ·ÈÆ·ÅÈ²ÆÆ³ÆÇ´ÈÆ³ÄÇ¶ÆÃ¹ÇÈ¶ÅÅ²ÄÄ¶ÅÊ²ÊÄ²ÆÃ´ÇÃ³ÃÆ²ÈÃ³ÆÃ¶ÆÃ´ÆÂ®ÇÆµÆÁ±ÇÀ³ÆÃ²ÅÀ²ÅÅ²ÃÃ­ÂÁ±ÆÃ±ÃÂ±ÃÅ³ÆÄ³ÅÁ·ÁÃ¬ÃÁ²ÃÃ³ÄÃ³ÆÅ±ÃÃ°ÂÁ®Â¿¯Ã¾®ÂÂ³ÄÁ¯Ä¿³ÅÁ®ÃÁ±Á¾³ÃÁ®ÁÃ­ÅÁ¯ÁÁ°À¾¬Á¾¯ÁÁ¬Á¾±Á¾®À½³ÃÁ±ÁÀ®¿Á¬À¿­ÂÁ¬Â¾²¼¾°Á¿±Á»¬¾¿¬½¼«¿º®À¿®¿½«¾º¬¼»­¿½ª¼¼¬¾½¬»¾«¾º¯½»«½¼®»¼«¾¾¬½¼©»¹«½»¬Á¸ª¾¼©¼¸«»°£³´¦»µ§¹·§¾¶§½¶§»¹§¼·§½·ª··¦»¸¤»¹¦º»©½µ£¸¹©»º§¼»¬¾´¦¼·«½»©½¸§ºº¬½¹§½¸©¾¹ª½¸ª¾º©¾·©»¸«¿¸¨À»©¾¹ªÁºª»¸§¾»¬¿»ª½»«¿¸©¾»ª»·¬»¹«¿»©Áº©½º­¾¼¬¿·«¾½¬Á¿¨À»­Á»¨¿»¬À¾ª½»®Á½«Âº«¾À¬Á¾¬¿»­¾»«¼½¬¾»¬Á¼©Á¹¬Ä¼­Á¾­Å¾¯¾¾¬Á¼®ÂÁ®ÄÁ®Á¾®Ä¾¯Ã¾¬ÁÀ­Â¾±ÄÁ®Ã¾°Å¾°ÁÀ®ÁÁ²Ã¿±ÁÁ¯Å¿®ÅÃ´ÂÁ®ÅÃ­ÃÁ¬ÅÀ²ÃÂ°Â¾²ÁÁ¯ÅÃ±Ä¿¯Å¾³ÂÁ°ÈÄ¯ÆÃ°ÆÁ­ÇÁ®ÃÁ³ÆÄ¯ÅÁ­ÅÃ±ÆÃ±ÆÆ±ÅÃ±ÄÂ³ÆÆ±ÇÃ²ÇÃ¯ÈÃ³ÆÆ±ÈÄ³ÇÁ´ÈÅ´ÈÄ³ÈÃ³ÉÆ³ÈÄµÊÃµÇÅ°ÅÆµÊÅ²ÇÆ²ÊÆ³ÆÅ²ÇÄ³ÈÃµÊÈ³ËÈ°ÇÅµÇÇ³ÊÅ³ÉÇ²ÇÃ³ÉÃ³ÈÆ´ÈÆ°ÈÈ³ÍÄµÇÉ¶ËÆ´ÉÆ³ÈÇ³ÊÈ³ËÆµÈÅ³ÊÆ³ÊÇ·ÊÆ¸ÉÇ¶ËÅµÊÆ²ÊÈ´ÊÅ³ËÇ¶ÍÊ³ËÈ´ÉÆ³ÈÈ¸ÌÇµÊÇ¶ÈÈ³ÈË¹ÌÅ³ÎÈµËÇ·ÎÇ¶ÊÇµËÉ·ËÈ³ÊÈ·ÉÈ¹ÎÉµËÆºÌÉºÏÊ¶ÏÈ·ÈÈ¶ÌÊ·ÌÈµËÈ·ÌÉ·ÌÉ·ËÉ¸ÌÈ·ÊÊ·ÌÊ¸ÌÉ¸ÎÇ¶ËÇµÎÊµÎÉ¸ÍÊ¸ÍÊµÎÊ·ÎË¹ÊÉºÏÊ¶ÐÈ¸ÊÊ¶ÎÇºËÈ·ÌÌ¼ÎÈ·ÎÌµÑÍ¾ÐÌ»ÎÍ¹ÐÌ»ÎÌ¹ÐÌºÎÊ½ÐÌ·ÑË¹ÏÎ»ÌÌ·ÑË·ÌÊ»ÐÊ¸ÎÌ¸ÐÌ»ÏÏ·ÌË¸ÐÊ»ÍÍ¹ÐÍ¾ÐÌ½ÓÐ½ÐÌºÒÎ½ÏÌºÎÌ¼ÐÏ¼ÎÎ¼ÏÍ·ÐÎ¼ÐÍ¾ÐÎºÐÎ»ÐÐ»ÐÏ»ÐÌ»ÒÍ½ÎÐ»ÐÌ»ÏÌ¾ÌÏ»ÐÍ¹ËÉ¹È¾±¾µ¶£|wn[~]Ur`UrgOrl`txduw`zr]|zdgnlf|i|i~dzdzd~zb{dz]~|_]{x]zz]u[~w]|[|_dgnqwrrtnnuqtq t¢r |¨{ªw¡©¢´§¶§·©±¬¸­»¬Á¯Â°»²¾³Ã¸Ï©¸çªÆê°Èé·Êð»Ó÷ÁÕúÃÙúÎÜúÓäúÜèúâíúæôúâôúäõúâóúÜñúÖìúÊéúÆãúÇáúÃâúÈáúÊßúÎæúËãúÌáúÌáúÎßúÇßúÃÝõ¾ÕðµÓñ³Îí®Ëæ¬ÇÜ¤ÂÓ¾Í¶Ã³½°µ©®¦«¡¦|¡§w¡|§w©xª~¨z¦z£z¥r¦°´¬|©x¤z¢r¤t|¤zuriid[{W~w[xW|rYwuY{nWzoWxqWtoUtnUriUukQwlWroUqrYxnYulWtgStfUlfSol_xzgkid{kifx`t_|r]zdWtdUr`Sn`OnfUkfUtgUnd]qn`|³¡«¾¬»Ã±ÅËºÉÎ»ÌÌºÏÊ»ÎÏ»ÒÎ¾ÎÌ½ÏÎ¾ÓÍ»ÐÌ»ÐÌ»ÎÌ¼ÎÎ»ÐÎ»ÏÐ»ÒÉ½ÌÌ¼ÌÎ»ÍÌºÎÌ¼ÎÌ»ÎÉºÌÎ¹ÎÌºÍÌ»ÍÌ»ÏË»ÐÌºÐÊ¹ÌË½ËÍ¸ÎÌ¸ÊÌ»ÊË¸ÍË»ÌÌ½ÏÌºÏÌ»ÎÊ»ËË»ÌÊ»ÍÊºËËºÎÊ»ÌË¸ËËºÌÈ¹ÏÊºÌË·ÎË¸ËÊ¸ÈÌ¸ÎÈ¸ÎÇ¸ÊÈ¸ÍÇ»ËÌ¸ÌÊ¹ÌÊ¹ÌÊ¹ÉÉ¸ÊÇ·ÊÉ¹ÊÍ»ÊÎºÎÌ¹ÉÊ»ÍË¸ÊÌ¸ÌÊ¼ÌÊ»ÌÉºÊÊ¾ÌÌºÌÌ¹ÍÉºÊÊ¶ÎÉ¹ÊÉ¸ÌÊ³ÈÇ·ÊË¸ÈÈ¶ÈÈ·ÌÉ¹ÊÉ·ÊÇ´ÉÈ¶ÉÈµÊÇµÊÉµÈÆ¸ÊÆ·ÈÈ¶ÆÆµÈÄ·ÊÃµËÆµÇÆ±ÈÅ²ÈÄ·ÆÆ´ËÆµÇÅ°ÆÇ·ÈÄ²ÆÁ³ÆÅ´ÃÅ°ÄÃ³ÅÅ³ÆÅ²ÆÄ³ÆÃ³ÆÃ³Ä¿³ÅÁ¶ÆÄ²ÄÁ°ÅÁ¯ÆÁ³ÃÃµÃÄ³ÄÁ¯ÄÃ²Ä¿³ÆÀ®ÄÁ±Á¾³Â¾¯ÁÁ¯ÄÀ²ÂÀ³Á¾­ÁÁ°ÃÁ°À¾­ÁÀ®ÂÁ®Á¾°À¿®Á¾¯¿¾¯Á¿®¿½¯Â¾¬ÀÀ®¿¾®Á¿­À¾®Áº¬»¾¬½¾­Á¾­¾½ªÂ¾¬À»¬º½¬À¾«À¿¬»¾¬À½­¾»¬¾»¬»¿«Âº¬¼¹«À¼¨À¸­»»¬À»®À»¬¾¹©¾½­¾·«¾»¯½¹¬¾¹ª¼·«»»¬¾ºª¾»¬·¹¬½·«½·«¾»ª»·¥»·«¹»¬¼¹¨¾·¨½·«½·©º·§»·©¹´¥¹¸¨»·§¹·§¹·¤»¸«»³¥ºµ£¸³¥¹¶§¹¶§¹´¥·³¦º·£º²§´µ«º´§·¶£·´¤·¿ª¿¹«Á¼ªÀ½©¾¾¨¾¾«¿¿¬Á½«½¼ªÂ¾¦Â½«À¿­¿Àª¿¾¬Á¾¬¿Â«À½¬ÀÀ¬¿Á¬Â»®¿À¬Á¿¬Â¾«Á½¬ÁÀ¬À¾¬ÁÀ¬ÃÀ±Â¾¬ÃÄ¬¾À¯ÃÀ­Ã¿­ÂÂ®À¿¨Å¿¯ÃÁ¯ÂÁ®ÆÁ³Æ¿­ÃÀ­ÂÄ®ÆÁ³ÂÃ®ÅÁ¬ÀÁ³ÃÃ­ÂÃ®ÁÁ³Ä¿°ÃÃ®ÃÁ³ÃÅ²ÆÃ²ÈÂ¯ÂÂ°ÄÆ³ÃÂ°ÄÀ­Â¿±ÂÅ±ÆÃ³ÆÂ´ÆÃ®ÃÅ³ÄÆ³ÃÂ²ÈÁ²ÅÃ³ÅÈ³ÈÅµÅÆ²ÈÃ·ÆÆ´ÆÃ´ÈÅ³ÈÆµÊÅ³ÆÂ±ÆÄ²ÇÄµÈÈ°ÉÆ³ÆÃµÈÇ±ÆÇµÅÅ´ÈÈ³ÊÅ³ÇÇ´ÊÆ±ÊÈ³ÆÇµÈÈ·ÉÈ³ÊÆ´ÇÉ²ÊÆ¶ÊÆ´ÏÈ³ÌÆ´ÈÊ·ÌÅ¶ÌÈ´ÊÅ¶ÈÊ¶ÌÈ¶ÍÆ¶ÌÆ¶ÊÊ¶ËÈµÌÇ¶ÍÇ¶ÌÅ³ÈÈ¶ÊÈ¶ÌÉ¶ÊÍ·ÌÊ·ÊÉµËÈ·ÌÌ¶ÎË¶ÍÊµÌË·ÎÊ¸ËÉ¼ÍË¶ÎÉµÎÊ¹ÑÈ¸ÍÌ´ÌÍ¹ÎÊ¸ÎÊ»ÌÌµÍÉ¹ÌÎ¹ÏÌºËÊ¸ÌÍ¶ÌÌ·ÎÉ¹ËÌ¸ÐÌµÊÎ¹ÐË¹ÏÌºÐÎºÎÍ·ÏÍ¹ÍË¼ÎÎ»ÐÊ¹ÌÌ¹ÐÌ¶ÌËºÏÏ¸ÐÎ½ÌÎ¸ÓÌ»ÐÌ¹ÏÌ¹ÐÎ»ÐÎ»ÑÎ¹ÐÌ¶ÑÌ»ÎÌ¹ÐÎ¼ÐÏ·ÐÌºÑÐ¼ÐÌ½ÐÐ½ÓÍ»ÎÐ»ÎÎ»ÓÐ»ÑÎ»ÐÐ»ÏÐºÕÌ»ÎÎºÒÑ¹ÐÐ¿ÑÑºÐÎºÒÏ¼ÎÏ»ÒÐ»ÖÏ¼ÐÐ¾ÐÏ½ÓÎ¼ÐÐ½ÒÒ¿ÓÑºÒÑ¸ÑÌ»ÒÒ»ÒÑ½ÒÒºÐÏ¾ÑÐ»ÒÒÁÕÐ»ÐÑ»ÑÕ¾ÒÒ¾ÒÎ¼ÑÓ»ÓÓ¼ÖÓ¿ÕÒ½ÓÒ¿ÓÓ½ÎÐ¿ÕÒ¹ÒÑ»ÐÕ¾ÑÓ»ÕÐ¹ÓÓ¼ÒÖ¾×ÒÀÕÓ»ÒÔÂÓÒ¿ÕÕÁÔÒ¾ÓÒ½ÕÕ¿ÓÒ½ÔÑ»ÕÐÀÓÕ¼ÓÖÀÕ×¾ÕÕ¾ÓÕ¾Ö×½ÓÔÁÕÕ¿ÕÔÀÓÓÁÕÒÁÓÎ¹ÍÊ»Ç¿¨Á ¨xubr_|f[xf[xt_wikiounzwzrnngd`dgddfdbfnknu w¦¦~¥ª{¨ zx©x«~­~ ²§·¦º«¼¯¼¬Â³ÂµÍ·Ò¡¼Ü¦Á×ÁÏÁÖ¤Áã«Ää©Êä¥ÆÜ©ÆÞªÊç®Ëî¼ÐúÊÙúÐàúÓâúÖçú×èúáíúäðúçôúï÷úñúúóúúïúúëúúå÷úáöúÛóúÖñúÔòúÛðúÚïúßòúåõúßòúÛïúÝðúÛïúÙëú×êúÒçúÐäúÏáúÈàú¾ÙôºÒè¯Íß®ÇÜ¥ÂÓ½Ë¾Æ´Ã³»°»¯¼¬½¬³ª°¨²§­¥¨~§¬x¡¥z£{¥{¢ w ¡w¡| {¢z¢~utidddbb|`w_~]{_~]z{Y{z_{q]zu_zr[{t[uz_zubuxb{w]znWzq`zr[~zb|kqntnnndzbwbw]xn]wi[ui`uo[un]qo_ztdo¢¡Ä±»Î·ÇÑ»ÍÕ¾ÑÓÁÕÔÂÒÕÀÓÕÁÑÒÁÒÔÁÕÓ¾ÒÕÂÖÕ¾ÐÕÁÔÐÁÑÓ¿ÕÖÁÓÐÃÐÒ½ÒÒ½ÒÓ¿ÒÓ¾ÔÐ¾ÓÔ¼ÓÒ¾ÓÕ¾ÓÎ»ÐÒÀÑÓ¾ÓÐ¿ÒÐ¾ÎÌ¾ÒÒ¿ÒÒ¾ÐÓ¿ÕÐ¾ÒÐ¿ÏÓÀÓÑ¿ÒÒÀÓÒÁÔÑÀÓÒ¾ÐÐ¿ÒÐ¾ÕÐ¼ÐÍ½ÎÏ¼ÎÒ½ÐÒ¾ÎÐ½ÒÐºÒÐ¿ÎÐ»ÐÎ¼ÐÐ¾ÑÒ¼ÎÑ¼ÏÎ¼ÐÏ¿ÏÐ»ÐÐ»ÎÌ¼ÍÐ·ÐÐ¾ÐÑ¿ÓÓÁÓÏ¼ÐÓÁÒÐ¾ÔÐ¾ÐÍ¾ÑÒ¾ÒÎ»ÍÐ¾ÑÐ¾ÎÒÀÎÒÀÏÒ¾ÑÏ¾ÑÒ¾ÐÐ¾ÍÐ¼ÐÐ¾ÐÐÀÎÏºÏË¿ÌÎ»ÌÎºÎÌ¹ÎÎºÌÎºÌÎ¾ÍÎ¾ÌÉ·ÎÈ·ÈÍ»ÌÎ»ËÌ·ËÌ·ÍÈ»ÉÌµÉÉ¹ËÊ¶ÌÌ·ÊÈ¶ÊÌ¶ÍÈ·ÍÇ·ËÈ·ÎÍ·ÉÇºÊÌ¶ÈÈ¹ÊÈºÊÊ·ËÊ·ËÅ¶ÊÆ¶ÉÈ´ÈÊ¸ÅÄ´ÍÈ³ÈÇ´ÇÊ·ÆÈ³ÆÅµÈÆ³ÅÆ³ÈÆµÈÅ´ÅÆ·ÆÅ³ÈÂ·ÆÃ¶ÆÇ¶ÇÃ¶ÄÉ·ÅÂ°ÇÅ³ÅÅ´ÆÃ³ÅÃ¶ÆÄ®ÅÃ³ÆÅ³ÃÆ±ÅÁ³ÅÄ²ÆÁ²ÆÁ±ÃÂ­ÁÀ³ÃÃ³ÃÁ³ÅÂ²ÃÁ±ÃÁ°ÅÀ±ÃÁ±ÆÃ²ÄÂ¯Ä¾¯ÃÂ®ÂÀ¯ÂÁ®ÁÆ¬Å¿¯ÂÀ±ÃÁ¯ÃÂ¯¿Á±ÃÃ³ÂÁ°Ã¾¯ÁÁ³ÄÁ­À½³ÃÄ³À½¬À¾²ÁÁ¬Á¼®Á¿¬¾Â³ÂÀ±Â¼¬Á¿¨ÁÀ®Â¾²À¿®¿¾¬¿¾®¾½¬Á¼¬Á¼¬¾¾­Á¾¬Á¾ª¾¿®¼¾­¿½ª»½©»»¬»½¬¿¼®»¸¬½¼«¹ºª¼»¬¿»«»¸¨»º¬¼º¬¾º¨»°¥µ·¥¸·£··§¾µ¤»»¤¹¶¥¾¸ª»¸¦¸¶ª»¹§¿·¦½µ¦½¸¦»·¥¾»ª¹¸©½º§»·©½·©»¸£¾¸©½¸¦»¸¨¼º¨¿»©½¸ªÀº¨º·¨»¸§¾¹§½¹©½»©¼¸§¾¸©¾¼¬¾º¬½º¦»»§¿»¨¿º©¾»¬¾·©½º©»»¬À¸¦À¼ª½»ªÂ»­Á¹¬¾½ª»¼ª¾»¬Áº«½¼­¿»«Á¼¬Ã½§Á»¬¿¾­Á¾¬Ä¾­Á»®¿»«Ã»¯Ã»¬Á¾¬ÀÁ«À¾¬¿¾±Á¾­Ã¿¬ÁÁ®ÃÁ­Ã¾°Ã¾®ÃÂ®Ã¿¯ÃÁ°Á¾®ÂÀ¬ÁÁ¯Â¾®ÆÃ¬ÃÀ°Ã¾²Æ¿±ÅÀ®Â¿¯ÆÁ®ÃÀ±ÃÁ²ÅÃ±È¾°Æ¾¯ÄÁ³ÃÀ²ÄÁ°ÃÀ±ÅÁ°ÅÅ±ÃÄ²ÈÁ²ÄÁ±ÆÀ²ÈÁ°ÄÁ³ÆÃ®ÇÆ±Ç¾²ÈÃ­ÇÄµÊÅ³ÇÁ°ÇÀ°ÃÃ³ÈÅ´ÆÆ¯ÆÂ³ÇÅ´ÇÆµÈÃ´ÅÃ³ÆÄ³ÈÅ±ÈÄ¶ÇÅ³ËÆ¶ÉÃ¶ÈÇ²ÊÅ³ÈÄ´ÈÉ´ÊÄ³ÈÁµÉÈµÌÆ°ÆÅ¶ÉÄ´ÉÆµÈÇ³ÈÆ´ÊÅ²ÉÃ±ÉÉ³ÈÄ³ÊÅ´ËÈ´ÌÉ·ËÈ²ÊÆ¶ÊÈ·ÊÈ³ÊÇ·ËÈ³ÊÈ·ÊÆ·ÈÇµÈÆ·ÊÃ¸ÍÈ·ËÇ·ÍÆ³ÊË·ÊËµÊÅ¶ÊÆ³ÌÈ¶ÌÊµÊÊ³ÉË·ÊÊ¸ÊÈµÌÆµÊÊ·ÊÊ¶ÏÇ¹ÍÊ·ÌÈµËÈ¹ÎÉµÌÊµÊÅ·ÌÈ¶ÌÈ·ÌÈ¸ÎÊ·ÎÊ·ÍÉ¸ÏÈ¶ÌÈ¹ÎÊ¸ÐÊ¸ÌË·ÌÈ¸ÎÊ¸ÐÊ·ÌÉ·ÌÌ¹ÍÊ·ÌÊºÌËºËÈ¸ÌÌ»ÎË·ÎÌ»ÏË½ÐÊºÐÊµÏÌ·ÐÌºÐÊ¸ÎÎ¹ÍÍ¸ÌÌºÌË½ÌË»ÏÌ¸ËÊ»ÎÊµÊÎ¹ÐÉ»ÌË¸ÎÎ¹ÐËºÌÎ»ÍÊ½ÒÐ½ÐÎ½ÐÏ½ÎÍ½ÎÑÀÐÒºÐÏºÏÎ»ÎÌ¼ÏÎºÑÎºÑÎ¹ÎÐºÎÏ¼ÓÌ¼ÓÐ»ÓÎ»ÍÏ¾ÐÐ¹ÓÎ»ÍÎ»ÍË·Ê¾°À­³zk]dYz`Qt_OoYQngYon[t|fxlooql{qnwd~z_u[xY|t[~]]b{Y~b|bf`gqnu¨«¤¬~«|¢«¡°°¤²£³¢·«»©Ã±È±Î´Ð¼Ô£¾Ø£ÀÞ®ÆçµÉî´Ïï¸Ìì²Îê¯Ïì·Ñô»Öú»Ö÷¾×ú¾×ú¾ÖúÂÛúÎÞúÖäúâèúàëúäðúçòúçõúæõúéöúïúúòúúïúúïúúãúúçúúè÷úâ÷úå÷úæõúéøúê÷úéøúèøúâôúàôúâóúÙïúÛìúÛîúÚìúÕéúÐäúÆßøºÕï·ÒñµÎç³ÊÝ«Æá¤ÆÛ¾Ñ»ÏºÎ¶Æ³Ã°¾³À±»®¼«·¦´|¥°~ ¨w  o¡qrnqllddiifbd``x]rQwrWunYutWxl[tqYtrUrkUrnSnkStiQoiQqoYqlUolUqiOugQoiWqkYtkYxr`uzg{f{`{dfzk|x`tY|o]tkYufUt]Qo`QwdMq`Snf[uub·¥²Æ´ÁÌ½ÊÏ»ÊÏ¾ÑÎ»ÏÎ¾ÏÐ¿ÐÍºÎÐ¿ÓÌ»ÏÌ»ÏÐ½ÐÌ»ÏÎ¾ÏÏ¾ÌÌ»ÌÎ¾ÐÎ»ÏÌ½ÎÎ»ÏÌ½ÏÍ¼ÌË·ÎÌ¾ÌÍ¹ÎÍºÍÊ¹ÏÌ»ÌÌ¹ÏÊ¾ÌË½ÍÌ¸ÎÌºÌÌºÎÊ¼ÍÌ»ÎÈ¼ÌÎ¼ÎÎ¼ÎÌ»ÌÊ¼ÏÎ·ÎÊºÍÌ¸ÉÌ¹ÌÊ»ÌÌ»ÎÊ¸ÌÈ»ÎËºÎË¹ÍÈ·ËÍ»ÍÍ»ÎÊ·ÌÌ¹ÌÌ¹ÉË·ÏÈºÉÊºÌÊµÊÊ¸ËË»ÎË¹ÌÊ»ÌË»ÎÎ½ÎÊ»ÌÊºÌÉ·ÎÊ½ÊË»ÊÌºÊÉ»ÎÈ¾ÌÊ¼ÊÈºÊÊ¹ÌÍ·ÊËºÊÌ¹ËÎ¹ÎÊ¹ÍË»ÉÌµÌËµÊÊ¸ÈÇ¸ÉÇ¶ÉÈ»ËÈ¹ÊÉ¸ÅÆ¸ÉÈ¸ÊÆµÆÈ¶ÇÉ¶ÈÃ³ÊÆ·ÉÇ¶ÈÅ´ÇÆµÄÆ¸ÇÆµÇÁ´ÉÆ·ÉÆ³ÆÄ³ÈÁ¶ÇÇ³ÈÁ³ÆÂ´ÄÁ±ÅÄ±ÆÁ²ÄÃ´ÆÃ°ÅÃ³ÅÀµÆÂ±ÃÀ±ÁÁ±ÃÂ³ÄÁ²ÆÂ°ÅÃ±ÃÀ°ÃÂ°ÅÂ¯ÀÃ³Ã¾³Ã½±Á¿°ÃÀ±ÁÀ±ÄÁ²Å¾¯ÁÁ±¾½­Á¾°¾½°¿¿®½»±ÁÀ®ÂÀªÀ¾¯À¼®Â¾®Áº®Á¾«¾À¬Ä¾­Á¼¬À¾®Ã¼®¾½¬¿»«¾»®¾À¯½¼­¿»«¾»­Á»¬¾»¬¾¿«¿¾©Áº«¼»«½¼«¿»ªÀ»¬¿·­¾»¦À»­¾¹¬»¾ªÀºª¿¹®½º«Á»©½¸¬¼¹¨»¶©¼»¬»¶ªº¼¬ºº¬¹¼©¾¸­»¸«»»ª¾¸©½´ª»·§¹¸ª»¶§··¥¹·©º·§»¶¦º¸¨··¨¸µ«»µ§º·¥¸´¦ºµ§º´¤·³¥·¶§»µ¥·²¥¸¶§µ·§·µ¬·¾¯¾¾­Â¾°Á½¬ÀÀ¬¾¾¯À½¬¾¾°¾¿­À¾®Ã¼®¿¼¯Ã¼«¿½¯¿¾¬¿À®Á¾¬ÂÀ¯¿¿®À¾«¿¾®¾½¬Á½­Á¿¬Å¾¬Á¼¯Â¾­Â¿®Á¾¬ÅÁ°Ã¿¯ÂÁ¬ÂÂ­ÄÁ²Ä¿¯ÁÁ³Â¿°ÁÂ³ÃÀ¯ÂÁ®ÃÁ¯ÂÀ±Ä¿³Â¾­Á¼±ÁÃ°ÅÁ¯ÄÁ±Â¾³ÃÃ²ÃÂ¬Á¿°ÂÁ±ÃÃ¯ÄÁ±ÆÀ³ÁÁ°ÃÀ³ÃÁ¯ÆÁ²ÄÂ±ÆÁµÆÂµÅÃ­ÆÃ±ÄÅ´ÉÁ³ÅÆ³ÆÆµÈÅ²ÈÆ´ÅÈ³ÆÇ´ÈÃ³ÆÄ±ÆÈ°ÈÉ³ÅÆ³ÇÁµÈÂ³ÇÆ¹ÇÃµÊÃµÈÅ·ÈÆ´ÅÇ·ÈÃ´ÈÈ·ÇÃ³ÇÆ·ÇÈ·ÈÆ·ÌÆ¶ÈÆ·ÈÄ·ËÆ·ËÈ¶ÈÉ·ÊÅ¶ÉÇµÇÇ·ÍÆµÈÈ¶ËÈ´ÊÇµÉÉ·ÊÈ¶ÍÊ¸ÉÊºÍÈµÌÊ·ÊÈ³ÌÌµÉÉ¸ÊÆ¶ÉÆ¹ÎÊ·ÌÊ»ÌÇ¶ÊË¹ÍÈ¸ÊÈ¸ÎÉ´ËÊ¸ÊË»ËÊ¸ÍÌºÎÇ»ÍÊ»ÌÈ»ÌÊ»ÊÎ¹ÎÌ¼ÌÊ¼ÎË·ÌË·ÍÊ¶ÐÎ¸ÍÊ¹ÎÇ¸ÍËºÎÈ¸ÏÈ¸ÍÊ¹ÎÌ»ÍËºÎÌ¹ÍÎ¸ÐË¹ÎÎ¾ÎÎ»ÎÈ·ÎÈ½ÍÌ¼ÎÊºÐË¼ÏÎºÎÌ»ÏÍ»ÐÏ¹ÐË»ÒÍ»ÐÌÀÒÎ¼ÐÊ»ÐÎ½ÐË¾ÐË»ÌÍ¼ÐÐ¼ÐÍ»ÏÐ½ÒÒ»ÓÍ»ÑÎ»ÎÏ½ÑÎºÐË»ÓÐ»ÑÍ¼ÓÎ»ÒÎ½ÑÎ»ÐÎ»ÏÐ¼ÕÓ½ÐÌ¿ÒÎºÒÐ»ÐÑÁÒÐ»ÑÐ¼ÒÒ¾ÓÐ¿ÒÑ»ÓÎ¿ÐÐ¾ÐÑÀÕÎ¼ÍÐ¿ÐÒÀÓÒ½ÒÎ¾ÒÐ»ÒÓÁÓÕ¾ÕÒÀÓÌÁÓÑÁÓÓ¾ÓÒ½ÕÐ¿ÐÒ½ÕÒ½ÓÑÀÐÐ½ÕÎ½ÐÒÁÖÐ¾ÓÒ¿ÕÑÀÓÒÁÓÒ¿ÓÐÀÔÓ¾ÕÓÁÖÒ¾ÓÒÂÔÓ¾ÕÕÁÓÒÁÔÕÃÕÕÁÖÔÁÖÒ¿ÔÓÀÕÓÂÓÕÁÕÕÁÕÓÂÕÕÆØÓÂÕÒÂÓÓÂÕÖ¾ÓÓÃÑÓÀÎÍ·É»¬¼§¬zwgr_{k_xi]qgYtr_wlb|iqwuxzzw~kz`g_{fkflfdlknqz¥§{¬µ¨¶¨µ¨º¬ÂªÆ²Æ´Ê°Ì·ÎºÎ ¹Ø¤¼Ú¨¾ä¦Ãä®Èí·Íö¿ÕúÆØúÌÞúÒàúÕâúÙçúÒæúÎãúÌâúÑçúØéúÝéúÜíúÚíúÕíúÓéúßìúãóúìöúò÷úóúúõúúóúúðúúöúúöúúöúúõúúóúúòúúôúúñúúöúúôúúõúú÷úúöúúóúúïúúìúúëúúé÷úæ÷úè÷úäóúãòúØïúÒíúÌãúÆãúÈÞúÁÙùÁØö¸Öî³Ðí¶Êî­Ìã¬Æä¬Æâ­Æã¬Çá¬Âà¦ÁÚ¢ÁÓ ¼ÒºË³Á¶»±·¨±§³£®{¡¤wnolnkkkiki{bzf|{`z_zu`xk_xl]ri[rl[wl[tr[uw[rt[xtdqt_xz]xo]zn`uq`|r[uq`xuguwg|~nllqqtk~{kzd{ud{qb{n[wf`xqb~{k±¬Å³¾ÐÁÇÒÁÐÖ¿ÒÔ¿ÓÔÃÒÕÁÔÓÂÖÔÃÒÙ¿ÔÒ¿ÓÕÅÒÔÂ×Õ¿ÓÕÃ×Ó¿ÖÓÁÒÒÁÓÑ¾ÓÓÁÓÎÁÒÑÁÒÒ½ÒÓÁÓÑÂÒÒ¿ÒÓ¾ÑÑÂÐÓ¿ÕÏ¾ÎÓ½ÒÐ¿ÐÒ¿ÐÎ¾ÒÓÁÐÒ¿ÓÑÁÒÓÂÓÒ½ÒÒÁÐÓÀÓÑ¾ÑÑ¾ÑÌÀÏÒ¾ÎÐÀÓÒÁÏÑ¾ÒÎÃÐÑÀÏÑÀÐÐ¾ÐÐÁÑÐ¼ÎÌ¾ÐÐ¿ÒÎ¿ÑÌ»ÒÎ¾ÎÐ½ÎÒ»ÏÐÀÒÑÀÎÒ¾ÐÒÁÒÒ¾ÑÒÀÒÐÄÓÐÂÐÒ¼ÒÎÀÏÒÁÒÐÁÑÏÁÒÎÅÎÑ½ÒÎÀÍÐÀÑÏ½ÑÍ½ÏÑÂÓÎ¼ÒÏ¿ÑÌ½ÏÏ¾ÏÎ»ÎÊ»ÍÐÀÎÌ»ÍÌ¼ÍÌ¼ÌÍ¼ÎÎ¿ÐÍ½ÍÊ¸ÌÐ»ÌÊ»ÌÌ¹ËÉ¼ÌÌ»ÌÌ»ÌÊ»ÉÌ¹ÌÍ¼ÍË¼ÌÊ¹ËÊ»ÊÉ¹ÌÊ¼ÎÈ»ËÈ¸ÈÉ·ÌÉ¹ÈÇµËÇ¶ÊÊ¹ÌÅ¸ÉÅµÇÆ³ÅÇ¶ÈÆµÊÇ´ÇÇ´ÆÆ·ÉÇ·ÈÈ·ÆÆ´ÊÅ¶ÈÄ³ÆÆµÆÇ¸ÈÆ¶ÈÅµÆÆ³ÅÄ³ÆÅµÇÂ·ÄÃ¶ÅÄ°ÉÄµÄÂ´ÆÅ´ÃÁ³ÅÃ¶ÃÅµÆÂ³ÄÅ´ÃÆ´ÅÃ³ÃÂµÃÅµÈÂ³ÄÁ³ÁÁ°ÂÃ²ÃÃ³ÃÃ³ÃÁ±ÂÂ²ÃÇ²ÇÀ±Â¿³ÆÀ±ÁÆ³ÄÂ³ÃÁ±ÁÀ°Å¿³ÅÃ³ÃÁ²ÃÁ°ÁÁ³À¿¯Ã¿³¿¾²ÁÃ°ÃÀ±ÃÂ²ÃÀ¯ÁÁ±¿½°Á¾¬¾Á±ÀÀ´ÀÀ°ÃÂ±À½´¿À­Á¿±Á¾°½¼°¾¾­¿¾¯¾¿¯¿¼¯Âº«¿¾°»¿­½»­¼º­À¾®½»¬¾»°¾¹¬¾»¬½·¬¼º­¾º¬½¹®½¹§¼¹«»¹¬½»­»»­¼°£´¶§¼µ¥¹¹§¹¹§»»¥¼¹©º·¨»»©¿·¨»¸©º»¦½¹ª¸¸¦¼·¨½¸ª½¸¬¾¹¥½¸§½º¬»º¥½·§º·§¹º©¾¸¨½¸§»·§¾¹¨»¹¨»º©Á»¥Á»«¾·ª¼º§¿·¦¿»®¾º«¾¸¬¾»ª¾¿«¾º©¼»©»º¬¾¼§¾»¬½»©À»¬¾»°¿½«Â»«¾»­Á¼¬¾½ªÀ»§Àº®¿¼¨Ã½­Á¼­Á¼­ÃÀ®Á¾«Á¾¬Ã¿©ÁÀ­ÄÁ¬Â½¬À»¯ÁÁ«Ä¾®Á½¯ÃÀ³Å½®Á»­À¾°ÅÁ®ÃÀ±ÅÁ°Æ¾®ÁÁ¯ÃÃ¬Ä¾¬ÃÁ¯Á¼²ÅÀ°ÃÀ¯Æ¾±ÆÂ­Á½¬ÂÀ±ÇÁ®Ã¿²ÆÄ²ÄÄ±Ã¾²ÇÁ±ÃÁ¯ÅÃ°ÆÂ³ÃÃ¯ÇÁ°ÆÀ²ÅÁ®ÅÃ³ÈÁ±ÃÂ³ÄÃ±ÆÃ°ÄÆ³ÆÃ³ÅÃ²ÄÃ³ÇÄ³ÇÀ³ÆÁ³ÅÃ²ÇÅ²ÆÆ³ÉÄ²ÌÄ´ÇÃµÆÅ±ÉÃ³ÈÅ³ÉÆ¯ÊÂ´ÆÄ´ÄÈ±ÉÆ´ÈÇ´ÊÃ²ÊÅ³ÊÈ±ÈÇ·ÊÈ±ÄÄ·ÈÆ±ÆÇµÈÆ´ÇÄµÈÇ´ÌÅ·ÈÆ´ÈÅ´ÈÃ´ÊÆ³ÉÄ³ÊÆ²ÈÇ´ÇÆ·ÊÆ³ÈÆ·ÉË·ÊÇ¶ÊÄ³ÊÇµÊÄ¶ÌÇµÊÇµÈÇ´ÊÊ¸ËÈ·ËË²ÍÈµÌÈ·ÎÈµÌÈµËÊ¶ËÈ¸ÏÌµÎÈºËÆµÌÊ·ÎÈ¶ËÈ·ÊÆ·ÌÆ·ÊÇ¶ÌÊ·ÊÅ·ÉÈµÊÇ·ÌÆ³ÊÉµÌÉ¶ÎÆ¶ÊÈºÌË¸ËÈ¶ÎÆ·ÎÊ¹ÌÊ·ÎË¸ÌÊ¶ÏÍµÌÆ¹ÏÊ¸ÌÌ·ÎÊ·ÌÊºÏÌ¸ÐËºËÈ¸ÐÌ»ÌÌ¸ÎË¾ÒÌ¸ÎÌ·ÍÌºÏÌ»ÑË¹ÊËºÎÏ¸ÏÉ»ÎÊ»ÎÍºÌÎºÌË»ÐÎ¹ÐÊ¸ÎÌ»ÍÏ»ÏËºÐÎºÎÌ¼ÐÍ»ÎÌºÏÎ¾ÐÏ·ÑÌ¼ÍÏ¼ÒÍ½ÏÎ½ÎÐ¾ÐÎ½ÏÌ¾ÌÎ¾ÑÏ»ÒÏ¼ÒÎ½ÎÑºÒÐºÑÌ»ÎÍ½ÐÑ¾ÐÎºÏÎ»ÒË¾ÐÍ¼ËÄ³Ã¨·rfbSw]Qr]Qq[MkWMi]Qo`Qtqbxilnwnkx]w[wUn[tWxY~f`_z_{_|[`git¥{®|¡¯¥¸¨»«Á®Æ³Î·Ò¸ÒºÓ»Ü¦Áâ§¾å¬Ãã±Æê­Èî°Ìò·ÒôÁÔúÊÛúÔáúßèúàëúáêúåðúâïúÝîúàíúàðúáðúÞðúæñúãñúßòúÜòúÛïúáïúéóúìøúîøúðúúõúúïúúòúúðúúòúúðúúôúúôúúöúúòúúñúúõúúøúú÷úúõúúóúúêúúëùúéùúëúúëúúêöúæöúàôúÝðúÓîúÌèúÇâúÈâúÃÝúÃÝùÁ×ú¾Öú¼×ùÀÖù¾ÕúÃØúÄÖú¾Óù¾Ó÷»Ðï·Ñæ±Èä®Æâ¤ÁÙ ÀÕ»ÍºÊ´¾®¸«µ~¦¯¡¦tqrqgg[`xYxWu[{oY{gQwgSr`Qo`Ql`Mq_Mk`Qg`ModUkgSlkQqgQqkUqtWtiUuiWqfUriSqdQndStgSrn_zwbzz`~t]z{o|n~z`xnb{x`zwdztbzg[u_Kqd[xnb|q¡¹¬µÎ·ÆÍ»ÉÐ½ÌÐ¾ËÏ½ÐÐ½ÑÎ»ÏÌ¾ÎÏ½ÎÍºÐÎ¾ÎÐ¼ÐÐ¹ÐÌ¹ÎÌ¹ÏÎ¼ÒÎ½ÍË¹ÏÌ¼ÒÎºÐÎ»ÌÌ½ÎÍºÏË»ÏÌ»ÎÎ¸ÌÈ¹ÌÊ¸ÍÏ¹ÐÊ»ËÈ·ÌÊ·ÏÈºÎÍ»ÒÎ»ÍÊºÌÍ¾ÏÎ¹ÌÊºÊÈºÊÊ»ÐÍ¹ÊÊ»ÉË»ÎÌ»ÏÊ½ÍÌ»ÌÎ¹ÍÌ»ÎË¹ÐÉ¸ÎÌ¹ÎÌºÌÌµÎÇ»ÊÊ¹ËÈ·ÌÈ¹ÌÊ¸ËÊºÌÌºÌÉ·ÈÉ»ÎÌºÍË¿ÎÌºÏÌºÌÌ»ÌÎºÌÌ·ÌÊ½ÊÍ»ÌÌ¸ÌÈ¸ÊÉ»ËÈ·ËÈ»ÌÊºËÈ·ËË¹ÉÊºËÈºÌÇ¶ÌÈºÊÊ·ÉÊ¶ÈÆ·ÌË¹ÊÊ·ÊÊ·ËÆ·ÌÈµÊÉ·ÉÈ·ÊÆµÊÇ·ÊÇ·ÇÆµÈÅ·ÆÆ³ÆÆ·ÈÈ¶ÇÈ¸ÇÃ´ÇÆµÆÆ´ÇÅ³ÄÄµÇÆ·ÈÆ³ÆÁ°ÅÁ³ÄÆ³ÇÁ²ÆÃ³ÆÁ³ÆÃ°ÅÃµÅÃ¯ÆÀ°ÃÆ°ÈÂ®Á¾³ÃÀ¬ÅÁ´ÆÁ³ÃÃ®ÃÂ²ÃÁ±Ä¼²ÃÂ±ÃÀ­Á¾±ÂÀ°Á½²Ä¾°À½®ÄÁ¯Á¾­À»±ÁÁ­Á¿®Ã¾­À¿²Ã¾²Ã½¬À¾¬¿¾¬¿»°Á¾±Ã½¬¾»®À¿¯À»¬Àº®Àº¬¿»¬Á¾¬¿¼¬»»¬¾½­¾»¬À»©½»¬¿»­¾¼®¿º«Â»ª½¼°Á»«»»°Á»¬À½©¾·«¾¸«¾»­»¸«½½¬Áº©½µ¨»·­¾¼«¼º®»¹ª»¼®½¸«»»«¾»©º»¬»»¨¾»¨¹¸ª»»«¾¸«»·¦»´©¸·ª»µ¨»·«·³¤¸·£¸µ¥¸´§»¶£µ´¦»·¥¹µ¥¸²¤¸²§··£·µ§µµ§··©»¹¬¹¾©Á»©¾»¯À»°¿¼®À½¬½¼®Â½¬¿Á­½¿¯Á¿®¿½­½¾­¿Á¯Á¼¬À¼­Ã¿¬Á¿«À¼®Ã¾®¿¾¬Â»«¿¾­Ã½¬½½®Â¾¬Â¼­¿»¬ÀÁ¯Á¾¬¾½¯¿½¬ÀÀ¬Â¿®ÁÁ®Ã½­Â¿±ÂÃ±ÃÀ°ÃÀ­ÁÂ¯ÁÁ³ÄÀ®ÄÁµÂ¾²Æ¾°Á¿³ÁÂ¯ÇÁ³ÄÁ®ÅÂ®ÃÂ­ÂÀ®ÂÃ²ÄÂ®ÇÃ¯ÅÀ³ÂÆ²ÅÁ³ÁÄ¯ÆÃ³ÇÂ°ÅÃ²ÂÃ´ÇÃ³ÃÃµÅÄ¶ÆÃ°ÆÃ²ÃÄ°ÈÅ³ÆÃ°ÃÅµÉÃ²ÊÃ³ÉÅ·ÇÆ´ÈÆ´ÈÂ³ÈÁ³ÆÅµÈÈµÈÆ·ÇÃ³ÈÃ³ÊÆ´ÇÃ³ÅÆ³ÆÈ´ÆÇ·ÈÈ·ÈÇ¶ÈÇ¶ÇÆ·ÈÆµÉÈ¶ÆÆµÇÆ³ÊÅ¶ÈÅ¸ÊÈ¶ÌÈ³ÈÇ·ÈÆ·ÈË·ÌÅ·ÊÆ´ÌÊ¹ÊÅ·ÆÊ¹ÊÊ·ËÈ¹ÍÉ»ÌÈ¹ÌÈ´ÊÆ¶ÈÊ¶ËÉ¸ÍÇ¸ÌÊ¹ÌÊ·ÌÈ¹ËÊ·ÐÉ¹ÌÍ¸ÍÍ»ÇÉºÍÌ¶ÎÊºÎÎ·ÏÌºÎÎ·ÎÍ¶ÎÊ¼ÌÊ·ËÌ¸ÎËµÌÌ¸ÌÊºÎÈ¸ËÊ¹ÍÊ¹ÐË¸ÊÊ¸ËÌ¹ÎÊºÌÉ¼ÌÊ½ÐÊ¹ÎË»ÍÍ¼ÎÊºÎÊ·ÎÎºÏË·ÎÍ»ÒÉ»ÐÐ»ÐÌ»ÍÌ»ÐÍ·ÐÌ»ÎÐ»ÒÐ¼ÑÍ¼ÎÌ¼ÐÎ»ÒÌºÎÎ»ÑÎ½ÑÌ»ÐÌ»ÓÎºÐÏ»ÐÎ¼ÌÌ»ÎÎ»ÎÎ¼ÐÐ»ÒÍ¸ÒÑ·ÎÏ»ÏÏ¹ÐÌ¸ÒÑ¾ÐÎ»ÒÐ½ÒÏ¿ÎÎ¾ÒÐÀÓÍ¾ÒÎ½ÔÒ»ÐÐ½ÑÎºÑÐ»ÑÐ½ÒÒÁÑÐ»ÐÎ¾ÒÒ»ÑÓ¼ÒÑ¾ÓÐ¿ÓÓ¹ÑÏ½ÏÓ¾ÖÒ»ÓÒ¾ÒÐ¿ÒÓ¼ÓÐ¿ÐÒÁÒÑ¼ÒÐ¼ÑÐÀÐÒÁÒÐ¿ÓÍ»ÐÕ»ÓÓ»ÕÐÃÒÓÁ×ÒÁÒÒÁÓÓÁÒÔÁÓÑÁÓÒ¾ÓÕÁÕÑÂÕÔÁÓÓÀÕÓÃÕÒÁÖÕÁ×Ó¿ÒÕÃÕÒ¿ÕÓÂÕÕÁÒÖÁÔÕÀÖÕ¿ÕÓÂÔÑ¿ÐÎ½ÊÁ²Å°²{oo_f[xl]qiSugWog[xkY{nztrw{trgb|d{figqnlfdfo r«~¶¥»­Æ¯Ñ¶×¢»â¥Áâ®Âç®Æî±Éï³Ìð³ÌíµÍð½ÐöÄÒúÈÖúÅÛúÉÙúËßúÐàúÒäúÚéúáïúçñúëóúíöúïøúïúúðúúñùúîúúíúúíöúíúúì÷úìúúæúúèùúèøúíùúïúúðúúöúú÷úúøúúöúúõúúöúúøúúöúúõúúùúúøúúöúúùúúúúúúúú÷úúóúúðúúñúúðúúòúúðöúðúúïúúïúúçøúÝöú×óúØîúÕíúÔìúÕêúØëúÖêúÙëúÜìúÝêúÜçúÛéú×çúÒåúÒáúÉÝúÉÛúÄáúÁØøÁÓõ¾ÒñµÌê°Ëå®ÆÝ¡ÁÖ»Ï·Æ¯¿­¶¨®¥­¤xrkfi|bx_~q`{oY|kYukSulUtiYqi]to]wo`uw[uo[uw]zxb{z]ww`{x_{t[xobwq`zq_{qf|xikzi|iuoglnrkx]~rbrft¥¥Á²¸Ð»ÇÎ½ÐÖ¾Ò×ÁÒÕ¿ÓÑ¿ÖÒ¿ÐÔ¿ÑÕ¿ÔÓ¿ÒÕÅÒØÃÕÓ¿ØÓ¿ÓÕÃÒÕÁÕÕ»ÒÏÀÔÓ¼ÓÎÁÐÔÁÓÒÁÕÓ¾ÒÐÁÒÑÁÕÔ¿ÐÒÁÒÑ½ÓÒ¾ÒÑ¼ÕÐ¿ÐÒ¿ÒÐ¾ÐÓ¿ÒÑÀÒÎÁÒÐÀÐÔ½ÐÑÁÑÒÁÎÒ¿ÒÐ½ÐÒÀÐÕÃÒÑ¾ÒÐÂÒÐÂÓÏ»ÏÐ¿ÑÐ½ÒÐ¾ÐÒÀÒÒ¿ÑÎ¾ÔÎ»ÑÒ¿ÑÎ»ÐÎ½ÐÐ½ÐÏ¼ÑÍ½ÎË½ÌÒÁÐÏÁÑÔÀÐÒÀÒÎ¾ÒÐÃÒÒ¿ÒÎ½ÍÐ¾ÐÐ¿ÐÐ½ÐÌ¾ÐÎ¾ÍÐ½ÒÎ¼ÎÐ¾ÐÐÁÒÍ¾ÎÐ¾ÎÎ¼ÓÍºÏÎºÐÐºËÎ»ÍÌ¼ÑÏ»ÍÌ»ÎÊ½ÌÎ»ÎÌºÍÌ¼ÊÍ¼ÎÍ»ÍÎ»ÊÍºÊË»ÍÌ»ÊÎ¼ÌÊ»ÊË»ÌÎ·ËÊ¹ÎÇ»ÉÈ¹ÊÌ¼ÌÎ¸ÎË¹ÊÊµÊÈ¶ÊÇ¹ÌÆµËÈ·ÊË¶ÆÆ·ËÊ·ÆÈ·ÈÉ¹ÈÈ¹ÊÈ¹ÆÊ·ÈÈ·ËÈ¹ÈÇ·ÊÄ·ÈÆ¹ÊÈ·ÈÆ³ÇÃ´ÆÅ³ÇÇµÇÅµÃÄ³ÈÃµÆÄ´ÅÄ´ÆÂ­ÅÇ¯ÅÄ¶ÄÃµÈÀ±ÅÄ¶ÅÁ¶ÄÄ·ÅÃ¶ÄÅ³ÆÅ³ÃÃ´ÄÁ´ÅÂ±ÃÃµÃÂ²Ã¿°Ã¿²ÃÂ³ÃÁ´ÄÃ²ÁÁ°ÁÃ°ÁÁ³ÄÀ±ÂÁ±ÂÁ³ÁÀ¯Â¾¯ÆÂ³ÃÁ°ÃÁ°ÁÁ°ÁÃ³ÂÃ³ÃÁ°Á½³ÃÀ³Â½²Á¾´ÀÀ°ÁÂ°¿¿¯À¾±¾Á¬½Á±Á¼¯ÁÁ®Ã½®¿Á²Á¿­¿¼®À¼­À¾°¿½­Á¼¯¼»®¿¼®Á¹­¾»¯¿»ª½»¯¼¼¨¿¹¬½¾ª¼º«¼»§Àº«¼¼¬½»ª¾»¬¼¸®»¸ª½¹­»½®»·¬½±¡³µ¦»·£»·«¸µ¨»º¥¼¹§»·¦½¸¬¾»¤»µ¤¾º§½·§½¶ª»·¨»½¦¼ºª½¹¬¼·¨Á¶©¼·¦½¸¦¼¹©¿¸©¾½§¾¶¥½·ª½¼¦¿µ§½»§»¸¥¼»¥Á·ª¿»©»»¬¾¸«½¹©À½©¿»¬¾º¨»º©Á¹«¾¹©Á»«¾¹©¾·¨À¾¬À¾¬¼·ªÁ½¬¿º¬À½­À½«»»«À¸«Á¼ªÁº¨¾Á®¿¾«Â¾¬Á¾¬¾»¬Æ¼¬Á¾®Â¾¬Â¾ªÁ¾­Á¾­Ã¾¬À¾®Ã½¬¿Ã®ÅÀ®Ã¿®Á¾­Â¾°Ã¾­ÆÁ¯Â¾¯ÃÁ­Ã¿¬ÃÁ®ÄÀ­ÀÀ¯Æ¿®ÅÀ¯ÄÁ³ÃÁ¯Ã¾±ÃÁ¬ÈÁ°ÃÂ®ÃÃ±ÆÁ­Á¾¬ÆÃ¯Æ¾¯ÃÁ°ÄÁ±ÇÃ³ÆÀ¯ÆÀ³ÃÂ¯ÅÂ¬ÄÃ·ÄÀ°ÆÁ±ÆÂ³ÈÁ³ÇÃ®ÆÀ³ÈÄ±ÆÃ²ÈÃ³ÄÂ±ÈÃ±ÆÄ°ÇÆ¯ÇÃ®ÅÃ²ÆÄ±ÉÃ®ÉÄ³ÆÃ¯ÉÄ¶ÊÈ±ÆÅµÈÆµÈÆ¶ÊÄ·ÇÄ±ÇÈ´ÈÆ·ÈÈ²ÊÂ³ÊÆ³ÆÈ³ËÆ³ÊÄ³ÇÄ¶ÊÇµÉÆ´ÆÃ³ÊÅ´ÈÃ³ÇÃ³ÉÈ³ÊÆ´ÊÇµËÆ²ÎÉµÈÉ·ÍÊ³ÉÈ·ËÄµÊÊ·ÎÊ·ÌÇ·ÊÅ¶ÊÆ³ÈÇµÌÇ¶ÎÈ³ÉÊ·ÌÇ·ÌÇ·ÌÅ¶ÊÊ¶ËÈ³ÌÈ·ÊÈµÎÊ·ËÊµËÇ´ÌÈ³ÌÊ³ÌË¶ÊÈ±ÌÈ·ÊÊ·ÊÈ¸ÎÊ¶ÌÇ¸ÍÈ´ÌÌµÎÊ¶ÌÇ¸ÐÌ¹ÎÈµÍÉ·ËÉ·ÊÎºÎÊ¹ÎÈ·ÌÉ·ÌÌ»ÌÌ·ÌÈ»ËËºÐÈ¶ÊÈ·ÎÊ»ÊÊµÒÎ¹ÍÌ»ÎÌ»ÏË»ÐË¾ÎÎ¼ÐÌ´ÌÌ»ÍÎ¸ÏÌ¼ÍÆ·ÎÉ¸ÎÌºÑË¼ËÎ·ÐÍ·ÎËºÌÎ·ÐÍ¼ÐÍ»ÔÎ½ÎÎ¼ÏÌ¹ÏÌ½ÐÒºÒÎ½ÐÎ»ÐÍ»ÐÐ¼ÐÏ½ÐÎ¼ÒÎ»ÒÐ½ÑÌ¼ÒÌ»ÑÍ»ÐÎ¹ÏÏ½ÒÎ¼ÎÏ¾ÑÐ¾ÑÐ»ÏÐ¾ÎÌ·ÏÃ°Ç¸«º­«|lb`SzbMlYQg`In[Ql[SkgQt|dx~ffkrgdz]z_|Y|bglkfb[ggq«{¹¤È­Ï²Ý¡¾ê®Áð¸Èô¼Ëö¾Ò÷¾ËúÁÒú¾ÓúÇÓúÇÖúÉÙúÏÝúÕäúØãúÕæúÙéúÜèúáëúâîúàðúçïúéõúé÷úîøúë÷úðúúîúúíúúìúúéúúêúúêúúéùúëùúçúúèöúé÷úìúúíúúñúúñúúõúúñúúòúúóúúñúúóúúòúúòúúõúúõúúóúúöúúôúúïúúñúúïúúóúúðúúïúúðúúñúúîúúêúúäúúãõúáõúâôúãóúàòúÝòúâòúåóúâïúãïúäñúâîúáîúØêú×éúÚæúÕéúÍãúÌâúÌáúÎÝúÄÝúÄÙúÁÕõ½Óî¶Ëè®Êá©ÀÛ£»ÐºÆ°¼¬¹§·¤¯©z¡qrb_{Yt]~qQufOwgQo_Io`Ki]Ik`Qn_KlbUogSrnYuo]tn[qqYriWrqWxdUzlYukSrfQoi_u`|q`{q]wn_{r_un`uqbz{d|n~n~ft]{u`{g¡¿¬·Ä²ÁÌ¸ÈÌ½ÊÐ¼ÎÍ¹ÌÌ»ÎÎ»ÑÑ·ÏÎ¼ÍÎ¼ÎÐ½ÏÌ»ÎÍ¼ÐÐ»ÒÌºÎÎ»ÐÌ»ÏË¹ÍË¸ÌÌ»ÎÏ¼ÊÍ¾ÎÎ»ÌÎ¹ÎÌ»ÎÌ»ÍË¸ÌË»ÍÍºÍÌºÌË»ËËµÌÌ¶ÍÊ¼ÌÊºÌÎºÍÏ½ÌÌ·ÌÊ¸ÌÇºÌÎ»ÒÌ»ÎÌ·ÎËºÎÌ»ÌÌºÎÌ¹ÐÎ»ÍÇ¹ÎËºÌÉ¹ÌÌ·ÎË¼ÍÎºÐÉºÏÉ·ÌÌ·ÎÊ»ÊÈ»ÌÌ¹ÊÈ¸ËÆºÊÎ»ÌÊ¹ËÎ¾ÌË»ÌÌ¹ÍÈ·ÊÌ¾ÌÊ·ÍÈ¶ÊÈ»ÎÊ¸ÌË»ÊÊ»ËÈ·ÉÈ¶ÊË¸ËÈ·ËÊ¸ÊÈ¸ÌÊµÌÆµÈÈ´ÇÆ¶ÌÈ³ÈÆ¸ÊÆ·ÈÌ¶ÊÆµÊÈ·ËÅ³ÇÇ·ÌÈµÉÊ³ÈÆ¶ÇÈ¸ÊÈ·ÆÈµÈÇ³ÉÇ³ÊÇ³ÊÄµÆÄ´ÈÆ°ÇÅ´ÈÃ´ÄÁ³ÈÂ¶ÄÁ²ÆÄ³ÆÁ´ÅÅ³ÇÄ±ÅÄ³ÄÃ²ÃÁ²È¿²ÅÃ°ÄÄ³ÆÁ°ÇÁ¯ÄÁ²ÆÁ³ÁÁ³ÃÁ²ÅÁ¯Â¾³ÁÁ°ÄÀ°Å¾¯ÄÃ¯Ã¾°Ã½°Ãº­Á¿¬Á¼²Á½®ÁÀ¯Ã½¬ÀÀ²ÆÁ¬¾»«Á¾¬ÀÀ®Ã¾¯¿¼²Ã¿¬À½¯Á¾®¿¾ªÁ¼¬À¾­Á¾®Â»­¿º­¿À¬¾½¬¿¾¬Á¾¬À»¬¾¼¬¾¼¬½¼ªÁ¸­Á¹­À½«¾¹¬»º°Á»¬¿»ª¾º©½¾­¾º¬¿¼¯¾½¬¾½©½º¬»»¬¼¸¨»º©»»«½¸«¾·«¼º©½¹¨»»©½·©º¸§¾µ¦º¸¨º¹§··¬¼º¬ºµ«¾¸¥»¶©¹·¨¹µ£¸·§¹·¨»·¤»·§·µ¥¸³£»²¨·µ¦»¶£·´¦¸·¥·µª¸µ©¹·¦¸·§·»¨½¾¬¾¼«¾»¬Á¾°ÁÀ­¿»«Á¿­Â½¬¿¿­Á¼«¾¾®¿¿¯Â¾¬Ã¾¬Ã»«½À¯ÁÀ­Á¼­¿¾­À¿¬Á¾­ÁÁ­¾¿¬Ã¾®À¿­À¾ªÁ»¨ÃÀ¬ÃÁ¯Á¿­Â¿¬ÃÁ®Ä¾®ÁÁµÄÁ¯ÃÃªÁÀ¯ÃÀ²ÂÃ­ÄÀ³ÂÁ³ÁÀ¬Â½­ÁÀ±ÀÂ­Æ¿®¿À°ÆÁ±Å¿²ÄÃ®ÃÁ²ÂÁ²ÄÃ´ÃÃ°ÄÃ¬ÂÃ²ÃÃ³ÈÃ±ÆÂ³ÅÂ³ÇÆ°ÆÃ°ÅÃ³ÆÃ¬ÆÅ·ÈÂ°ÃÁ³ÆÆµÅÃ¶ÆÇ³ÈÆ³ÇÃ±ÅÈ³ÉÂµÃÃ·ÌÇ³ÆÆ·ÇÆ³ÉÈ¶ÊÃµËÆ¶ÈÅ³ÈÆ²ÆÆµÈÆµÉÈ³ÉÁ¶ÇÇ³ÇÈ´ÊÆ®ÈÆ´ÆÇ·ÈÆµÈÆ·ÍÆµÈÇµÈÈ¶ËÈµËÆ³ÊÅ´ÈÈ³ÊÉ¶ÆËºÇÇ¶ÎÈ´ÉÇ¹ÌÆµËË³ËÇ¸ÍÈ·ÊË·ÌÉµÊÊµÊÆµÊÆ´ÈÈ·ËÈ·ÇÈ¶ÈÆ¹ÌÊºÎÌ·ÍÊµÌÊ·ÊÍ·ÍË¹ÐÌ·ÌÈ·ÎÉºËË¹ÌÌºÍÈ¸ÎÌ¹ÎÌ¹ÎÌ»ÎË¼ÑÎºÎÍºÌÌ·ÌËºÍÌºÌËºÐË¶ÌÇ·ÐÌ·ÎÍ¹ÐË¹ËÌ»ÎÍ¸ÎÌ¹ÎË»ÏÍ·ÌÎ»ÍÌºÒÌ»ÐÌºÐÌ»ÍÎ»ÐÎ¶ÌÌ¹ÎÎ¾ÒÏ¹ÐÍ¹ÏÎ¼ÐÌºÐÑºÐÐ¼ÐÌ¸ÍÌ¹ÒÌ¾ÐÐ¾ÐÎ¹ÎÍ¿ÐÐ¼ÐÌºÍÍºÎÎºÒÎ¼ÑÍ»ÒÌ»ÐÑ»ÎÌ½ÐÐ¼ÐÏ¼ÓÐ¾ÒÏ¾ÓÎ¾ÐÌ¹ÒÒ¼ÎÐ»ÒÎ»ÑÐ¹ÔÍºÒÒ¾ÐÐ¾ÒÐºÑÎ¼ÖÐ»ÎÐ»ÒÐ»ÒÐ¿ÑÕ»ÔÓ½ÒÓ¿ÕÑ½ÖÑ½ÑÒÀÒÍ¼ÒÎ¼ÐÐ»ÐÐÀÒÐ»ÑÐ¾ÒÓ¿ÑÐ»ÓÐ¿ÕÐÀÒÓ¼ÕÎ¼ÒÓÁÕÓ¾ÓÐ¿ÒÒÁÔÔÁÕÒ¾ÕÒ¾ÒÕ¾ÓÓÃÓÒ¿ÖÕÁÖÔÁÕÕÀÒÕ¿ÓÒ¼ÓÕÂØÓ¿ÓÓÁÒÓÂÓÐ¼ÓÓ¿ÔÓÃÓÖÂÖÕ¾ÓÒÀÑÖÂÒÐ»ÒÇµÅ»¦¹¨uubn]|iWod]uiWugUof[{{dn~nouwrlikkrxorfgn¡|²¤Â«Î±à¥»ê³ÄòµÌøÂÑúÉÕúÎÖúÐÛúÏÞúÏÝúÐàúÐãúÑâúÖäúÛêúãëúâíúãïúæñúìóúéôúíöúï÷úñøúïúúïúúòúúóúúòúúòúúõúúóúúóúúñúúðúúïúúìúúñúúñúúðúúïúúòúúóúúõúúõúúøúú÷úúøúúôúúòúúöúúõúúôúú÷úúöúúõúúöúúøúúöúúöúúöúúõúúõúú÷úúöúúôúúòúúðúúïúúïúúîúúñúúíúúëúúíúúïùúîúúíöúï÷úëùúäôúãõúâòúçñúãñúâóúÞïúÝíúÜíúßìúÞëúÖéúÐæúÌàúÇÜúÆÛùÀÒøºÐñ¶Íí°Çã¬ÀÚ¥ÀÕµÍ³Å®¹§¯¤¬¤wtnk`zd|zYt[ww_wtYxlWrkWur`zu`z{fwb{_{|k|fz_qb~w]{t[zub|i~gzb{|`{q]zkbxuf{|f|lqroikÀ¬·Ì¹ÆÒ½ËÓÁÎÓÃÕÓ¾ÒÒ¿ÑÓÃ×ÕÂÕÕ½ÕÕ¿ÖÔ¿ÕÑÃÑÓ¾ÖÕÁÒÐ¼ÒÒ¼ÓÓÁÑÒÁÐÓÂÓÐÁÒÖ¾ÑÐÃÑÕ¾ÒÒ½ÒÑÁÓÐ¼ÒÒ»ÎÒÀÐÒÁÒÎ¼ÐÓ¾ÑÓ¼ÒÒ¾ÑÒÁÐÒÀÐÐ¾ÓÑ¾ÏÒ¼ÑÒ½ÑÎÀÒÑ¾ÑÑÀÐÒ¿ÒÓÃÑÐ¾ÐÎ»ÒÐ¿ÒÐ¿ÕÒÁÓÒ¾ÏÓ¿ÒÒ½ÕÎÀÐÐ½ÐÒ½ÒÍÁÒÐ¹ÑÐ¾ÑÎ¼ÐÍÀÐÌ½ÑÐ¾ÍÒ¾ÐÐ»ÎÐ¿ÎÐ»ÐÑ¼ÒÐ¾ÏÏ¼ÐÐ¾ÑÎ¼ÍÐ½ÐÎ½ÎË»ÍÎ½ÏÐ½ÎÌ¼ÌÎ»ÎÌ½ÍÐ¾ÐË¾ÊÊºÐË»ÌÊ¼ÊÎ¼ÍÌ¹ËÌºÌÎ¿ÐÍ·ÐÈ»ÍÎ»ÍÎ¸ÌÌºÌË»ÎÌ»ÌÌ»ÌÌ»ÎÏºÍË»ÎÊ¼ÎÌºÍÊ¹ÌÍºËÌºÎÍ¶ÈÊ¼ÌÊ¸ÊË·ÌÈºÊÇ·ÉË¹ÉÈ¼ÊÊ·ÊÈ·ËË·ÊÊµËÈµÉÆ¶ÆÇ·ÉÈµËÇºÈÈ¶ËÈ·ÊÆ¹ÊÇ¸ÈÅ²ÊÂ¶ÈÇ´ÉÇµÊÄµÈÇµÆÉµÊÃ¶ÈÁ³ÆÅ´ÇÅ¶ÈÅµÃÃ²ÄÄµÈÅ³ÄÃµÈÄ²ÅÁµÂÄ´ÃÆ¯ÃÁ·ÅÄµÅÄ±ÆÂ³ÅÄµÂÃ®Å¾²ÃÁ³ÀÃ°ÄÃ±ÃÂ²ÃÁ­ÅÁ°ÃÃ¯ÆÃ³ÅÀ¯Â½°ÁÁ¯ÁÃ¯Å¿°ÁÁ°ÃÂ±Á¾³¾¿±Ã¿¯ÃÂ³ÁÂ²ÄÁ°Â½±ÃÂ³ÆÀ²ÁÁ°¿À°ÃÁ³Â¾±Á¾­ÁÁ¬ÃÀ­Á½³Á¿³¾¼¬Ã¾±À¿¯Á¿°À½®ÀÀ¬¾»¬À¾ª½»¯Àº­Á½ª¼¼¯Á¿«½»§¿»­»·©Á»«À»­½½¬À¹ª¼»¬¼¼«½¼«¾¹ª¿º¬¼¼®¾¸­½¾¬¼®¡¶·¦»¸§»¸©»¸¦º¹ª¼³¤»¸§»¶¥¾»¦¼µ¥¹»ª¸¸§»µ¦»¸§»¹¨½»§¾º¥½·¥º»©¼¸§ºº§¼·§¾º§¸µ©½º¦»·¦»¸©¾»§¿µ¦·»©½º©¾¹§»º¨¾º§À»©º¹©¿º©À¸§»½«¿½®Á»¦¾·¬½»¨Âº¨Á¹©½¹«½»©À¹«»¼ªÁ»¬¿½­Á¼ª¾¼«¾¾¬½½©Á¾¬¿¾ª¿½¯¾»¯ÂÁ¬Áº¬ÁÀ­Ã¿®Ã¿²Áº«Á½¬¿¾«¾¿¬ÁÀ«Á¿¯ÃÁ¯Ä¿«Á¿­ÁÀ®ÅÁ©ÅÁ°ÆÃ°ÃÁ¬ÂÁ³Æ¾±ÃÂ®ÃÁ®ÆÀ­ÄÃ²Ã¼°ÃÀ­ÃÁ°ÄÃ¬ÃÁ±ÄÃ¯ÄÂ¯ÄÁ°Ä½²Ä¿®ÄÂ®ÄÃ³ÅÁ±ÅÁ°ÅÁ°ÄÀ°ÅÁ±ÅÃ°ÆÁ®ÆÄ­ÆÃ³ÆÅ¯ÇÁ±ÅÂ³ÅÄ²ÆÅ´ÆÄ²ÅÃ²ÊÄ²ÆÂ²ÅÄ²ÈÃ¯ÈÁ°ÆÃ²ÃÄ³ÈÃ³ÆÅ²ÆÃ°ÇÃ³ÊÆ²ÈÉ²ÇÆµÇÄ³ÆÈ±ÈÃ³ÇÆ³ÆÃ´ÊÅ²ÊÆ³ÈÄ´ÈÆ³ÇÇµÊÆ´ÈÄ²ÇÈ²ÈÄµÊÉ¸ÈÆ³ÈÈ³ÈÆ³ËÄ¶ÊÃ¶ÆÄ³ÊÄµÉÆ´ÌÉµÉÈ¶ÈÆ³ÊÉ³ÈÆµÊÈ·ÉÇ¶ÍÇ²ÌÈ·ËÈ³ÌÈ·ÈÆµÍÆµÌÊ³ÊÅ·ÊÈ·ÎÇ³ËÈ·ÌÈ³ËÊ¶ÌÅ³ÇÆ·ÌÉ·ÊÈ¸ÉÊ·ÍÈµÊÇµÎÊ¸ÌÉ´ÎÈ¸ÌÊ·ÌÈ·ÐÆ¸ÊÊºÊÈ¸ÍÌ¶ÊÊºÎÊ·ÌÊ´ÌÇ¶ÍÉ·ËÊ¸ÏÉ·ÎÌ¸ÊÊ·ÏÊµÐË¹ÏÈµÌÊ¶ÌÈµÎÈ´ÐÊ·ÎÌ»ÎËºÌÌ»ÎË¹ÏÌºÎÌ·ÌË»ÏÌ»ÏÊ»ËÍ¼ÌÌ¸ÏË¸ÌÍ»ÏÍºÐÌ¶ÐÊ·ÍÊ»ÐÌ»ÍÌ¼ÏÉ»ÐËºÍÏºÎÎ¸ÎÏ»ÍÎ»ÍÐ»ÎÐ»ÐÌºÎÎ»ÎÏ¼ÑÌ»ÌÎ½ÏÌ¼ÐÒ»ÎÐ¾ÒÐ¸ÒÎ»ÎÐ»ÐÎ¿ÏÌ»ÑÍ½ÐÒ¼ÏÏ¼ÏÎ»ÌÉ¸ÉÁ®À¬¬rg]fUw]Qq`OlYQl_Mk`Ko`Wqi]r|]|xbxglqqfdgignk~[go¦|¸¥Í°Û£¸æ°Áî»ÇõÁÌùÆÒúÎ×úÌÚúÌÙúÐÛúÎàúÒâúÖãúÓäúÖäúØèúÙíúÛèúßìúäïúäòúæòúæõúêôúìöúìùúìúúïúúòúúðúúñúúíúúîúúïúúïúúîúúíúúîúúíúúìúúñúúîúúëúúîúúîúúóúúöúúöúúôúúòúúõúúòúúïúúòúúôúúóúúôúúòúúñúúòúúöúúöúúöúúôúúôúúóúúòúúðúúðúúîúúïúúòúúîúúïúúíúúïúúìøúíúúê÷úêøúç÷úæöúæôúãòúãñúàñúãðúâðúÝñúÛïúàïúÞïúßíúÞéúØéúÓæúÍâúÎßúÉÜúÈÚúÁÔú¾Ðõ·Ìð¹Éè¯Áá¨¾Ø£¸Ë³Æ«½¥·¬{uqb`z_w[t[{wWzrUttUunYrnWtlUxo[wu_{~dwg~~d{q_wkYzoQuu`uxi{ub~nYwk]ufUr`QndUoi[wt_xz]wg~kxdt]lÅµ·Ê·ÁÌ»ÇÏ½ÊÒ½ÐÎ»ÎÎ¼ÐÌ½ÑÎ»ÏÏ¾ÏÍºÍÎ½ÐÎºÍÏºÐÍ·ÍÌºËÍ»ÐÍ½ÐÎºÏÎ»ÐÍ»ÎËÀÏÎ»ÎÌ¹ËÍ·ÌÌ»ÌÊ¾ÒÊºËÎ½ËÏºÌÉ»ÎÊºÊÌ·ÌÌ»ÍÌ»ÌÏ¼ÌÌºÎË¹ÌÍ»ÎÌºÍË¹ÍÍ·ÎÌ¹ÐÌ»ÎÊ·ÎË¸ÌÆ»ËÌ¹ÎË¸ÌÊ¹ÌÊ¹ËÌµÎÊ»ÌÊ¸ËÊ¸ÌÉ»ËÇ¸ÌÊ¸ÈÈ·ÉÊ¹ÊÌ¶ÊÊ¹ÊÊ»ÊÉ¸ËÊºÊË»ÎË¸ÌÈºÍÊ¸ËÆ¹ÊÊµÌÅ·ÇÈµËÈ·ÆÅ»ÈË·ËÊºËÈ¹ÊÇ¸ÉÊ·ÈÆ¸ÊÆ·ÌÈ²ÆÇ·ÇÇ·ÉÅµÊÆ´ÇÅ¶ÈÇ·ÌÆ¶ÊÈ·ÇÇ³ÉÈ¹ÆÆµÈÄ·ÈÆ·ÈÄ¸ÈÈ¹ÊÆ´ÈÇ¸ÈÄµÇÆ¶ÈÃ·ÅÄ¶ÈÆ¸ÊÅ³ÄÆµÇÃ³ÊÄ²ÇÃ³ÃÃ±ÈÄ·ÄÃ·ÁÂ³ÈÀ³ÆÃ´ÃÅ·ÆÁ²ÅÄ³ÇÃ²ÇÅ²ÆÃ±ÃÁ²ÁÁ®ÁÁ²ÄÁ±ÄÁ²ÃÁ²ÃÀ´ÃÁ³Ã¾³Ä¾¯Â»±Ã¼³Ã¿®À½¬Ã¿°Á¾®À¾®Ã¿¯¿½´ÃÁ¯À¾¬¾»±Á¿­Á¾®¾¾­¾»­À¾¯À¼¯½¼ª¾º«¾»¯Á¼¬Á¼¬¼º¬À»¬¾¾®¾»®¾½¬¿¼¬Á¹¬¼º­À½¬½½©¾¸­¾»«¿»¬À¸¯Á»­¿º©¼»©¾»®¿¹©º»¯»¸§½º­¼»¬»¹«¿·¬½»¬»»«¾»©»¸«»·©½¸¬½¸«½¸¨»»ª¿µ§»·ª»µ¨º¸§»µªºµ¨ºµ§¸·¦º·£··¦¸·«¹´¦¹¶¤»³¦º²¤º·¤¸³¡³´§¹´¥µ¸¥¸³§·´§¹¶¦¶´§¸¶ª·¾¨À»¬À½®¿½«À½¬Á½¬Ã¾­¿¼©ÁÁªÁ»«¾¾­Á½­Ã½¬½¼¬Á¿ªÂÃ¨À½­ÀÀ¬Â¿¬¾¾¬ÁÀ®Á¼©Á¾¬Á¾¬¿À¬¿½«ÁÁªÀÁ«¾»­ÂÀ«Â¾«ÁÀ®ÃÂ¬Ä¿¬Ä¾­Á½¬ÃÀ®ÃÂ®ÅÁ¬ÃÁ°ÅÃ¬ÆÁ±ÄÂ­Ã½¬¾À­ÃÀ®ÄÁ®ÃÀ¬ÃÁ°ÅÃ­ÇÁ±ÂÁ±ÄÂ®ÂÃ¯ÅÂ®ÆÃ±ÄÁ®ÆÃ³ÃÃ°ÂÃ¬ÅÅ±ÄÆ±ÄÅ³ÅÁ³ÅÄ¯ÈÆ¯ÅÃ±ÅÅ±ÇÇ±ÆÃ±ÈÆ´ÇÂ³ÈÃµÆÅµÈÅ³ÇÆ°ÄÄ²ÈÅ³ÇÄ´ÈÆ²ÇÆ±ÇÈµÉÆ³ÊÃ³ÈÃ³ÆÅ³ÇÇ³ÉÅµÈÆ³ÊÊ³ÊÈ²ÊÆ´ÆÇ³ÊÆ²ÊÈ¶ÊÇ·ÈÈ°ÈÈ´ÌÆ±ÉÆ³ÊÆ¶ÌÈ·ÈÆµÇÊµÈÈµÊÈ³ÍÇ³ÈÊ³ÉË³ÈÉ´ÊÇ´ÈÆ·ËÌºÍÈºÊÄ³ÍÌ³ËÇµÊÊ¶ËÈ¶ÌÅºÊÊ¸ÍÌ·ÎÈ¹ÌÌ¸ÍË´ÌÊ·ÎË¶ÊÉ¶ÌÊµÍÈ¹ËÊ¶ÎÊ·ÌÊ¸ÐÎºÐÌºÌÈ·ÐÌ¸ÎÈ¸ÌÍ·ÌÊ´ÎË¹ÍË¶ÐÌ·ÎÈ·ÌÌºÎÍ»ÍÊ´ÍÊ¸ËÌ·ÐÏµÎÌ·ÍÌ»ÎÌ¸ÎËºÐÌ¼ÎË·ÏÌ·ÌÏºÒÎ¹ÐÐ¹ÎÎ»ÑÍ»ÑÍ¹ÐÎ»ÔÎ·ÎÎ»ÐÌ»ÏÏºÏÍ¼ÑÏºÎÐ»ÑÍ¸ÐÐºÐÑºÒÌ»ÏÌ»ÓÎ»ÐÒ¼ÓÏºÒÐ»ÐÎ½ÑÎ»ÐÐ½ÒÏ¼ÒÎ¹ÒÒºÒÎ»ÒÐ»ÐÒ¼ÓÎ¸ÒÐ¹ÒÐ»ÒÒ¼ÓÐ»ÓÌ¼ÒÐ¼ÒÑºÐÌ¼ÓÎ»ÒÑ¼ÒÍ»ÒÒ¿ÕÔ¾ÒÏ¼ÓÒ¼ÕÐ¾ÓÐ¼ÒÓ¾ÓÒ¾ÕÐ»ÒÔ¾ÒÐ»ÒÑ¾ÐÒÀÒÒ¼ÒÑ¼ÓÐ¼ÐÓ¿ÕÐÁÐÐ¼ÔÓ¾ÕÒ¾ÓÑ¾ÓÕ¾ÏÕ¾ØÔ¿ÔÓ¿ÓÕ¿ÔÒ¼ÒÓ¾ÖÕ½ÖÕ¾ÓÕÁÓÔ¿ØÓ»ÖÕÄÖÔ¾ÖÔ»ÔÒÁÓÕ¾ÓÒÂÕÕ¾Õ×¿ÖÒÁÔÒ¾ÍÍ·ÎÁ§½¡¬zonYn[{i]xkSuiWroUtoSwq`uu_~bfnrrtoookitofw¶¥Î°â¬¼ðµÆú¿ÐúÁÒúËÙúÑÞúÖÝú×âúÓåúØäúÖèúØèúÜìúàíúàîúáïúãðúåóúæôúåòúäöúé÷úéøúêùúíúúïúúðúúòúúóúúöúúôúúôúúóúúòúúóúúóúúòúúñúúóúúñúúðúúóúúñúúñúúôúúöúúöúúøúúøúúøúú÷úúöúúöúúõúúöúúõúúöúúõúúöúúôúúôúúõúú÷úúøúúöúúøúú÷úúõúúòúúõúúöúúöúúöúúõúúôúúòúúòúúïúúíúúïúúðúúíúúíúúìùúíùúíøúë÷úéöúèöúçøúäöúèöúæöúçôúàõúáòúÜðúØíúÙìúÕçúÓäúÎâúËâúÇÙúÈÕùÁÒö¾Ïï·Êé³Åá¬¾Ù£ºÒ³Æ­¿ª¶ ¨wonifiifb{`~`{dgqg~f~u_xb~k~rkz`wd|u_~k[zn]wugztb~zi|nungd¾ªµÈ¸ÂÏ½ÌÔÂÑÓÁÐÒ¿ÓÓÂÓÔ¿ÕÕÂÓÖÁÖÕ¾ÓÔÁÐÕ¾ÓÐ¾ÒÒ¿ÓÓ¿ÒÕÀÖÐ¾ÒÓ¿ÕÕÀÎÑ»ÒÎ¾ÓÕÀÓÒ¾ÓÒ½ÓÒ¾ÓÒ½ÓÐ¾ÒÎ¼ÒÒ¿ÒÒ¾ÒÒÀÒÒ¹ÒÐ½ÒÒ¿ÑÒ»ÒÕ¾ÐÐÁÔÕÁÕÓ¾ÒÒÁÒÓÀÒÑ½ÐÒ¾ÑÐ¼ÎÑºÎÎÂÐÎ¿ÑÐ¼ÒÒ½ÎÒ¿ÑÑ¾ÓÒ¾ÐÏºÐÐ¼ÓÎºÐÎ¼ÎÐ»ÑÎ¼ÐÐ½ÐÐ»ÎÐ»ÌÒ¼ÓÏ½ÎÍ¿ÒÍ¹ÎÐ¼ÎÌ¹ÎÍ¼ÍÐ»ÏÐ»ÐÌ»ÌÑºÏÌºÌË»ÍÏ¸ÎÍ¸ÎÍ¾ÎÍ¸ÎÌ¸ÐÊºÊÍ½ÏÌ»ÍÌ¸ÌÉ»ÍË¸ËÌ·ËÌ»ÌË¼ÐË¹ÌÍ¾ÎÎ¹ÑÌºÌÊ¹ÌÎ¹ÍÌºËÌ¼ÍÌ¼ÍÉ¼ÌÌºÌÊ·ÏÌ·ÊÊ½ËÊºÍÉ¹ÎÊ¸ÌÊ¹ÍÊ³ÍÌºÌÈ·ÊÊ·ÌÉ´ÈÇ»ÊÈ¸ÌÊ·ËÊºÊÊ·ÊÌ¸ËÊ¸ÊÈ¸ÌË´ÆÆ³ÊÊºÈÆµÌÈ´ÊÆ·ÊÇ´ÊÊ·ÈÅ¹ÉÇ¶ÇÆ¶ÈÄ·ÇÆ·ÇÃ´ÆÆµÇÃ´ÈÇ±ÃÂ³ÅÅµÈÄ³ÅÃµÈÃ³ÈÈ®ÇÃ²ÅÇ²ÃÃ³ÃÁ°ÄÇ±ÆÁ±ÄÁ¯ÃÃ®ÄÁ³ÃÁ®ÃÄ®ÄÃ³ÃÁ¯ÅÁ¯ÂÂ¯ÀÁ³ÅÂ³ÃÁ¯ÃÂ³ÂÁ®ÂÃ³ÀÂ¯ÂÁ³ÃÃ±ÁÁ³ÃÀ­ÁÁ³Æ¾®ÆÀ³ÁÁ³ÀÁ¬Á¿®ÃÁ­À¿¯ÁÁ¯ÃÁ°Á¾°Á¾®À¾°ÀÃ¯À½®ÁÁ¬Á¾®Â¿²Â¿¬ÀÁ®¿¼®Â¾¯ÀÀ­Á¾¬Á»¬¾¿¯Á½¬À»«¿½¬¿¹©¿»¬À»¨¿»¨¼º©»»«½¹¨¿¹¦¼½ª½»¬¿»«»»¬½¼¯À»¬½»ª»°¥²·©»µ¦·¸¨¼·¨º·§··©»»§¾·§¸¸¦¹¹§½¹§»º¤»¸¤¼¶§¼·©»·©»·¨»·§¾»«»º©»º©¼»«¾·§»·¥»·ª½º©»»¬¾»©¿»¦½¼¬½»§À¹©¼»«½¼©½¼«½·¬¾½­¿·©½¸©½¹¬¾»¨½»¤¾º®»»¦¿¼©¾º­À¾©Á»¬¾¼ªÁ»®À¾®À»­À¾®Áº®¿»®Á¾«¿¼ªÃ½®Ã»¬Ãº¬Á»­À¿°ÁÀ­Á¾°Á¾ª¾¾®Ä¾®Ã½¯Ã¾­Ã»±Á¾®Á¾­ÃÁ°Â¿°ÁÁ²ÄÁ°ÂÁ°Ã¿±ÁÁ°Ä¿±Ä¾¯ÃÂ¯Á¾±ÄÀ¬ÄÁ¯Â½°ÃÃ¯Å¿¯ÃÂ²Ä¾°ÅÃ°ÃÁ°Ç¾°ÃÁ°ÆÃ±Å¿°ÇÁ±ÅÁ®ÃÃ²ÆÄ³ÈÀ°Ã¿³ÆÁ²ÆÁ°ÆÀ²ÇÃ²ÆÃ³ÆÂ±ÅÃ´ÆÆ²ÆÄ·ÆÄ³ÅÄµÈÀ®ÁÁ­ÃÁ³ÇÂ°ÆÆ³ÆÆµÆÁ³ÈÄ±ÌÆ³ÇÅ³ÆÃ·ÊÆ³ÈÅ³ÇÄ·ÈÅµÇÆ²ÈÄ¸ÈÉ³ÉÃ³ÌÄµÉÄµÇÆ·ÉÃ³ÈÃ´ËÄ³ÈÆ³ÆÈ¶ÊÇ±ÈÅ¶ÊÇ¶ÉÄ¸ÌÆ³ÇÆ·ÊÆµËÆµÈÆ³ÉÇµËÈ¶ÍÉ´ÉÆ¶ÊÈµËÃ·ÈÉ·ÊÃ¶ËÆ·ÊÈ´ÉÈµÌÈµËÇµÎÇ·ÊÈ¸ÍÇ¹ÉÇ³ËÈºÍÇ·ÎÇ¶ÊÊµÌÊ·ÊÊ¸ÏÇ¶ËÈ·ÌÈ·ÊÊ³ÍÆ»ÌÊ¸ÎÊ¶ÌÉ»ÏÈ·ÌÊ¶ÍÈ½ÌË¶ÌÇ¶ÍÊ¹ËÈ¸ÎÉ¶ÎÇ·ÌÉºÍÊ¶ÏÊ¸ÊËºÎË·ÌÇµÌÊ¹ÍÌ·ÐÉ¸ËÈ·ÌÊ¹ÎËµÍÌ¹ÎÏ·ÎÎ¹ÐÌ¹ÎÈ¸ÌÌ¸ÐÊ¹ÌÊºÊÌ¸ÎÌ¸ÌË¸ÏÌ¸ËÈºÏË»ÎÎºÎÌ¹ÎË¾ÌÎ»ÒË»ÏÌ»ÐÐºÐÌ¼ÐÍ»ÎÎ»ÑÌ¹ÏË»ÒÏ½ÐÊ»ÐÌ½ÏÐ»ÐÎÀÎÏ½ÌÌ¼ÐÏ½ÐÎÀÏÍ»ÏÎ½ÕÍ»ÏÐ¾ÐÐ»ÑÒ½ÏÊ¹ÏÊ»ÎÉ´ÈÁ²Â®³xn`gUzbQwUQn]Mn`Mn_QkdUnnYti[uxYw|`~|f|kgqokf~fddor±¡Ê±ã²½ô»ÆúÄÐúÆÖúÌÖúÏÙúÎÜúÏÝúÒßúÐâúÕåúØãúÝêúÜìúáìúãïúãðúåîúáðúâòúæñúçôúåôúåõúìøúéøúê÷úëúúïúúíúúòúúñúúñúúðúúòúúïúúñúúðúúîúúîúúíúúîúúîúúïúúðúúóúúñúúõúúôúúøúúøúúöúúöúúóúúôúúôúúöúúôúúòúúòúúñúúòúúòúúóúúöúúõúúõúúôúúöúúóúúöúúõúúõúúöúúôúúòúúñúúñúúìúúèúúëøúçúúë÷úé÷úéùúê÷úëùúèùúæ÷úæõúâöúâõúåôúâõúáôúáòúÝñúÝðúØèúÙéúØéúÓâúÒâúÌßúÎÜúÈÙúÆÔúÁÐù¾ÌóºÈì´Äæ±ÁÝ­ºÚ¥·Î°È¬½¥´¡ª xtnlkgid|x`~z]|bt`|{dr]zkYwq`xw`zk|krbzlYtlYqiUqd[of[qn]x`Wot`wzdzzbxxb~td|t ·£´ÉµÃÌºÈÌ½ÍÌ¾ÍÒ¾ÎÒ¼ÒÏ¾ÐÐ¾ÏÍ¾ÎÌ¼ÎÌÀÑÎ¼ÎÎ»ÏË½ÌÑ»ÎÏ½ÏÏ»ÐÌ¼ÐÐ¼ÏÎ¼ÒË½ËÏ»ÎÎ½ÊÌ¿ÎÍ»ÏÌ¾ÊÍ»ÎÎ½ÎÌ»ÌÊµÌÍ¼ÌÍºÌÌ»ÐÊ½ÐÏ»ÌË½ÊÌ½ÏÏºÌÎ½ÑÌ¾ÌÌ»ÏÌ¸ÎÌ»ÎÎµÎÊ»ÏÌºÌË¸ÌË»ËÉ¸ÊÎ·ÌÌºÌË»ËÊ»ÎÌ´ÍËºÌË»ÍÊ·ÊË¹ÈÉ¹ÊÉ¹ËÈ»ÎÊºÌÉµÊÊ¹ÊÇºÊÆµÊÊ¹ÈÉ¸ÉÆ¸ÊÈ·ÉÉ¶ÌÇµÈÇ¶ÈÅ·ÊÉ¸ÈÇ·ÊÈ·ÇÈ³ÇÌ¸ÌÆµÅÇ´ÈÇ¸ÇÈ¶ÈÄ·ÇÆ¶ÉÆ³ÇÆ¸ÊÈµÊÆ·ÇÅ¸ÇÊ¹ÌÇ·ÇÆ¶ÆÆ¶ÊÉ»ÈÄ·ÈÄ´ÈÆ³ÇÇ¸ÈÅ·ÊÆµÇÄ¶ÇÇ·ÈÆ´ÃÃ¶ÆÃ¶ÇÁ´ÅÅµÈÄ´ÆÄ³ÃÆ³ÅÅ·ÆÂ²ÇÂµÂÇ³ÆÁ²ÇÃµÁÂ³ÆÁ³ÄÅ³ÁÁ´ÃÆ²ÆÈµÃÀ³ÃÂ°ÃÁ®ÁÃ±ÃÁµÃÃ¯Å¾°Á¿°Ä¿®Á¾³Á¾±¾¿¯Ã¾±À¾­¾»®À¾®À¼°¾½¬¾¾¬¾À­¾¾¬¿½®Á½¬¾À­Ã½®À½¯À»«À¾­ÀÀ¯»¼­Á½®¿»®»¹¬¿¿ª¾·¬»½®Á»¬À»«¿·®¾½©¾º¬¿»­¼½¬¾¼®¾¹¬¾½¬¾¸¬¾»«¾º¬¾¸«½»¬¾»«»»¬¾»­¼»¬¼¹ªÀ·¯¾º«¿»©¾»¬¸¼¬¾¹¨½¸ª»º©Á»«»µ§ºº©»»§½·©¾·«»·ª¼·ªº¶¬»µ§»·©»µ§½¶§·µ§ºµ¥¸·¨º´£»´ª¹·§¹·§·³¥·¶§¸³¥¸±¨··«»¼«¿º­¾»¬Ã»¬¿»ª¿¾®ÁÀªÃ¼­ÃÀ©Á¾¬½¿¬Á¾­Á¾ª¿½ªÀ½¨ÁÁ«ÁÀ­¾À®Á¾©½¼¬¿¿¬À¿¬Ä¾¬Á½®ÃÀ¯ÅÀ¬¾¿¯Á½°ÃÁ¯ÀÁ­Â¾§ÂÁ­ÃÂ³ÂÁ¯Æ¾¬Æ»¬ÁÁ¬Ä¿®Â¾¬Ã½°ÄÂ¯ÄÁ°ÂÂ­ÂÁ«ÃÂ¬ÂÁ¯ÆÃ«ÆÁ­ÅÃ°ÄÁ³ÄÀ¯ÁÁ²ÃÂ²ÆÀ°Æ¿³ÅÂ²ÇÃ±ÂÃ°ÅÁ³ÃÃ²ÅÃ³ÆÃ³ÃÃ°ÆÁ³ÃÂ²ÃÃ°ÉÂ°ÄÂ°ÈÃ±ÈÇ±ÈÆ³ÆÄ¶ÇÆ³ÈÃ·ÈÆ¶ÈÆ´ÆÂ³ÉÆ´ÇÁ³ÊÆ·ÅÆ³ÌÄ³ÈÃ³ÈÅ´ÊÊ³ÊÆ·ÊÄ­ÉÆ³ÊÆ´ÈÈµÊÈµÉÈ²ÊÃ´ÊË³ÇÈ·ÉÈ³ÌÈ¶ÌÆ¶ÊÃ´ÉÇµÊÈµÈÇµËÊµËÇµÊÅ´ÊÌ³ÈÉ¶ÌÊ·ÈÉ¶ÊÊµËÈµÈÊ´ÊÉ¸ÎÆ·ÊÉµÌÆ¸ËÉ³ÉÌµÍÉ²ËÈ¹ÌÊ·ÍÊ·ÍÈ·ÎÈ¸ÎÌ¶ÌÊ·ÌÊ¶ÌÊ¸ÎÍ³ÌÌ¼ÍÌ·ÍË¶ÐÊ¹ÌÌ»ÐÊ¹ÏÌ»ÌÊ¸ÐËºÌÊ¸ÍÊºÌÌ³ÏÊ¹ÏË¸ÌÍ·ÎËºÎÍ»ÐÉ³ÐÊ¸ÎÍ¹ÐË»ÒÉ¸ÌÌ»ÑÊºÒÎ»ÐÍºÎÌ¸ÓÎ»ÌÍºÒÏºÐÌ¸ÓÐºÑË¹ÐË¹ÒÎ¼ÒÐ¹ÐÌ¸ÒË»ÒÎ¸ÐÌ»ÐÌºÐÏ¹ÐÎ½ÒÌ»ÒÌ½ÐÏ»ÐÍ¹ÑÎ½ÎÐ»ÒÎ¹ÒÎ»ÓÐ¾ÓÐ½ÒÍ»ÐÏ»ÓÐ¾ÓÏ¾ÒÐ»ÐÎ¹ÒÌºÑÎ»ÑÎºÔÎ¹ÒÐ¿ÒÒ½ÔÎ¹ÒÏ»ÏÏ¼ÓÒ»ÑÎ»ÓÐ¾ÒÑ½ÓÒÀÒÒ¾ÖÒ»ÔÒ½ÓÑ¼ÕÐ¼ÓÎ½ÒÒ¼ÕÎ»ÓÐÁÓÒ¼ÓÒÀÕÐºÔÒ¾ÔÒ¼ÒÐ½ÒÓÁÕÒ¼ÑÓ»ÒÐ¾ÓÕ½ÖÓÀÕÒ¿ÔÓÁÖÔÁÓÓ¿ÕÔÀÖÔ¿ÕÓÂÓÓ¾ÔÔÁÕÐÁÕÐ¾ÓÒ¼ÕÒÁÐ×ÁÕÕÁÖÔ¿ÓÓÁÓÓ¾ÔÓÁÓÓÀÖÒ»ÒÒ¾ÌÈ³Æ¯³{¤zfq[kUzkY{lWzlSxkYw{b{w_{obz~_|dknfnrnogrl¥|»¨Ó¡²ê·ÅøÂÎúÈÖúÌÝúÒáúÎàúÏâúÓäúÐæúÖæúÕëúÙîúãðúåðúäñúåñúéõúæõúçôúç÷úë÷úêöúìøúíúúìúúíùúîúúîúúïúúðúúïúúöúúöúúóúúóúúõúúõúúôúúóúúòúúïúúðúúïúúóúúöúúòúúóúú÷úúöúúöúúúúúúúúúúúùúúøúú÷úú÷úúöúú÷úúöúúöúúõúúöúúôúúöúúõúúöúúùúúùúú÷úú÷úúúúúúúúúúúøúú÷úúöúúôúúõúúóúúïúúëúúíúúïúúíúúëúúïúúïúúëúúçúúêúúìúúêúúêúúéøúæøúâ÷úãôúâòúãôúàóúÛïúÙìúÖëúÒéúÑåúÒáúÌÝúÈÝúÇÕúÃÒúÁÐö»Ëï·Èí³Ãæ®¼Ýª¼×§·Ò£³È¬Áªµ®°³ ukoifk~bnbw`|zbb~olfxbu_u]{nd{qfutf{oY{n`xw`{zg~l~iq¸¦±ÇµÀÎ¿ÊÒ¼ÏÖ¾ÎÕÁÕÖÀÔÓ½ÓÖ¿ÓÔÁÓÖ¿ÔØÀÕÕ¿ÒÖÁÔÑÁÕÔÁÒÓ¾ÔÒ¾ÑÕ¿ÓÖÂÖÓ¼ÒÒÁÕÓÃ×Ò¾ÐÒ¾ÑÒ¾ÖÓ¿ÔÒÀÑÒ½ÒÔ¼ÒÔÀÔÒ¾ÒÒ½ÐÓ¾ÑÑÁÓÕ»ÓÒÁÐÒ¾ÐÖ½ÕÒ¾ÓÐ¾ÒÓ¼ÒÓ¼ÒÐÀÑÒ¼ÓÐ¿ÒÐ½ÓÐ¹ÐÎÁÒÒ¿ÒÒ¼ÐÏ¼ÐÌ¾ÑÒ¾ÓÒ¾ÐÏ¾ÒÐ¼ÐÒ½ÐÎ½ÎÑ»ÍÍ½ÎÎ¼ÐÐ¸ÎÐ½ÎÍ¼ÍÐ½ÐÏ¸ÐÌ¾ÌÊ¹ÍÎ¸ÐÌ¾ÍÍºÎÌºÍÎºÎË½ÌÌ·ÍÎºËÉ»ÍÊ·ÍÎ·ÎÌ»ÌÌºÌÌ¸ÌÈ·ÌÎ»ËÌµËÌ·ËÉ¾ÊÌ»ÌÌ¹ÍË¸ÌÌ¹ÌÌ¹ÍÍ¹ÎÌ¸ÎÈºÍË»ÊÍ¶ÎÍ·ÎÈ»ÎÌ¹ËÎ·ËË»ÌË·ÍÈºÍÊºÌÊºÌÉ¶ÊÊ·ËÉ¸ÌÊ¸ÊÈ¸ÊÉ¹ÉÉ¹ÊÈ¶ÈÉ¸ÊÄ³ÊÇ¸ÉÇ¸ÌÈ¶ÇÆµÊÇ¶ÌÊ¶ËÈ·ÊÆµÊÊ¸ÊÆ·ÈÃ·ÃÈµÊÈ±ÇÅ´ÅÆ³ÈÄ³ÅÄ´ÆÆ´ÆÇ³ÆÃ³ÈÈµÆÆµÆÃ¯ÃÃ²ÄÆ³ÇÅ²ÇÃ±ÅÁ±ÆÁ³ÅÃ³ÄÆ²ÆÁ²ÅÂ°ÁÃ²ÂÃ²ÅÃ±ÂÁ±ÆÂ³ÇÀ¬¿Â³ÆÄ­Ã¿³¾Â³ÆÁ¬Å¿²¿Á®ÅÂ±ÁÁ°Á¿±ÅÆ³ÅÁ¯ÂÁ²ÁÀ³ÃÀ¯ÃÁ¯ÅÀ³Ã¾®¿À²ÁÃ®Á¾°Ã¿³ÃÀ¬Ã¼®Á½±Á¿¬ÂÀ­Â¼±¿¿­ÁÀ­¿»®Á¿­Á¾­¾¼¯¾¾®Á½¬À½¬¿»¬¿½¬¿¾¬Á¼«Á¾ª¿»¬½»¨¾¼§À¾ª¿¹©¾»«¾»«½¸­¾»«À¼¬»º®¾»«»º¬»·¬»±©¶¸ª·µ§»»¦º·¨½¶¨»·¥¸º©½·¬º·¬¼º§º¸©»·«¼·©¸·§½·©¾·¨¾»©»·©»¹«¼·«»¹¦»¸¦»º¨»º«¼»ª¾¹§»»¨¾»¬¾»«¾¹«½»¬¼º©¼»«¾»¬¾·«¿·¨¼¹¬¾¼ª»»¨¼»¬¾º¬½º¬¾»¬¿»¬Á»ª¾¹§½»®À¾¬Á½ª¾»¬Á»«Á»¬¾½«Â»¬Á¾­À¾®À»®Á¾«À¼«Á¾¬Â¾¬À·¬Á¾¬Á½­À¾®Â½³ÁÀ­Ã¾­Á¾­Á»¬ÁÀ±À¾®Á¾°Å¾®ÁÃ·Ä¾±Å¾­ÂÃ±ÀÂ­Æ¾¯Ä¿®ÃÃ¯Ã¿®ÃÁ³ÀÀ­Ã¾®ÄÁ³ÃÂ²Â¾­ÆÂ±ÄÃ³Ç¿®ÂÁ²ÃÁ°ÃÄ³ÄÁ³ÃÃ¯ÆÁ±ÄÁµÄÃ²ÉÃ²ÁÀ¯ÃÃ·ÈÂ´ÇÂ®ÃÁ³ÇÃ´ÆÃ³ÇÃµÈÅ°ÄÂ³ÉÅ³ÇÂ²ÅÄ¯ÆÁ´ÄÃµÇÆ³ÈÄ´ÃÄ´ÈÆ°ÈÁ·ÈÃ³ÇÆ¶ÈÁ´ÄÄ²ÆÄ³ÈÄ¶ÈÆ³ÇÇ¶ÈÄµÈÄ·ÊÇ¶ÈÇ´ÆÃ¶ÈÈ·ÈÄ³ÊÄµÈÅ¸ÈÆ²ÈÄ¶ÆÆ´ÈÅ³ÈÆµÉÇ·ÊÅ³ÊÃµÊÃ³ËÇ³ÈÃ´ÊÉ·ÊÉ¶ÊÇ·ÆÉ´ÊÆµÊÊ¶ÇÈµÉÈ³ÊÉµÊÇ¹ÊÊ¶ÌÅµÊÇ·ÊÊ³ËÇ·ÎÇ¶ÉÌ·ÊÉ·ÍÆ·ÊÈ¸ËÈ·ÎÊ»ÌÇ¸ÊÉ¶ÌÈ·ÊÊ·ÊÇ¸ÊÇ·ÈÆºÎÍ»ÌÊ¹ÎÊ¹ÊÊ¹ÌÌ´ÊÊ»ÎÈ·ËÉ·ÎÇ¼ÌË·ÊÇ·ÊÈ·ËÊ·ÌÆ¸ËÈ¸ÌÆ·ÍË¶ÎÈ·ÌÈ¸ÌÍ¸ÐÊ¹ÊÊ¹ÌÌ»ÎÉ·ÍÊºÏÌ·ÏÌ·ÏÊºÎÎ»ÐË»ÍÏ·ÎÍºÌÊ»ÏÊ½ÐË¼ÎÐ¹ËÌ»ÌÍ»ÎÌ¹ÌÊ»ÌÌ¼ÓÏ½ÐÎ¾ÏÐ¾ÐÌ·ÏÌ»ÎÍ¼ÏÏ¼ÐÐ»ÎÍ»ÐÎ»ÑÏ»ÌÎ½ÌÒ¾ÓÐ»ÐÍ»ÑÑ½ÏÎ¸ÎÏÀÒÏ»ÐÎÀÒÏ¾ÐÏºÐÍ¾ÑÎ½ÍÏ¼ÌÃ³Æ·«¹¡¬uk`~dWwkSo`SkdSofQokUnn`tq[tiUqk]wq`w|f||b{{fililiot³É¯ç®½ó¿ÈúÊÒúÊÚúÎÙúÊâúÎßúÏâúÒâúÕäúÔæúÙçúÜëúßìúàïúßïúãîúäõúäóúâóúâòúåôúçõúçôúæôúæøúéøúëúúëúúïúúïúúïúúîúúñúúòúúîúúîúúïúúñúúðúúìúúðúúñúúðúúóúúñúúòúúöúúóúúóúúõúú÷úúúúú÷úúùúú÷úúøúú÷úúöúúôúúóúúôúúõúúôúúòúúöúúõúúôúúôúúõúúøúúøúú÷úúöúú÷úúõúúñúúïúúðúúíúúðúúìúúìúúêúúéúúçøúè÷úêøúèøúçöúçöúçøúæöúä÷úãóúçöúæóúãõúáõúáóúÜðúÛîúØìúÒéúÓäúÑãúÏâúÐßúÌÜúÊÙúÇØúÂÒú¿Ïô»ÉòºÈï¸Æë¬Áä®»Û¬º×§´Ñ¡¯Ë«Ã§¹£² ¯¥|ugb`fd|{gzd|nY|q]uzdz|bzl{f~w]{gUqg`tdWqdUkq_q`UnfUq`WnnWoo_tu`wrg³¨Ã­»Ç¸ÄÏ»ÊÐ»ÌÏ¿ÎÎºÏÒ¾ÌÎ¼ÐÎÁÏÎ¾ÑÐ½ÎÒ¾ÐÍ½ÐÐÀÎÎÁÐÒ¾ÍÎ»ÑÌ¹ÐÊ½ÌÏ»ÏÌ½ÌË»ÍÎ»ÍÌ½ÐË»ÊÎ»ÎÌ¾ÌÏ»ÍÎ¸ÌÍºËÎÀÎË»ÏÎ»ÎÍ¹ÌÏ½ÐÌ½ÎÌ½ÌÌ»ÌÎ¼ÏÌºÌÊºÎÌ»ÍÌ»ÊÍ½ÑÌ¸ÌË½ËÌ»ÎÍºÌÊ·ÈÊ»ËË»ÉÌ¼ÌÊ¹ÌË¹ÊÌ·ÊÈ¹ÍÌ·ÌÊºÈÈºÊË¹ÊÈ¸ÉÇ¹ÆÌ¾ÊÇ³ÈÈ¶ÈÈ·ÊÊ¸ÌÇºÆÊµÈÇºÊÇ¸ÆÈµÈÇ¸ÌÆ³ÆÉ·ÈÇµÊÆ·ÈÇ³ÆÈ·ÈÆµÅÆµÈÈ¶ÊÆ¶ÈÄµÇÃ´ÆÆ´ÆÇ·ÆÆ³ÇÄ¶ÈÆ·ÅÆµÈÇ·ÊÆµÈÇ¶ÅÅ°ÈÃ¹ÈÇ´ÇÄ³ÆÄ¸ÆÇµÊÆµÅÇµÅÃµÄÁµÇÃ´ÄÃµÅÃ¶ÆÃ³ÄÃ³ÄÄ·ÈÃ¶ÇÁ³ÅÆ²ÇÅ³ÄÃ¸ÆÃµÇÄ¯ÁÅµÂÃµÆÇ³ÄÃ´ÈÃ²ÅÃ²ÆÃ²ÄÃ³Ã¾±ÂÃ³ÃÂ³ÁÁ°Å¾°ÂÀ³Á¿¯ÃÁ®Ã¿³ÂÁ°Â¾¯ÃÀ°ÀÀ¯ÁÀ­Á¿­¾À¯À¾®Á»¯À¿²Ä¼­¾»¯¾¾®Â¿®Á½°¾¼®¾»­Á¾¬Á»°¼¸¬¾¼­¾»°¾¼ª¾½®¾»­¾½¬À»ª»º¯¾¼­½»«»»°½¹®»¼¬¾¼ª»»®¼º©¾»¬¼º­¾·©½º¬»º®½º©¾·ª¹¹¨»»¬¾»®¾·¬»¸¬½¹¬¼»¬½ºª¼·§¼¹®¸¶©¼¸¨¸¸©¸·«º·©º·¨¸¹¦¹º«¶³©½¸ªºµ¬»´©¹µ§»·¦º´©»¹¦·µ«»µ£·³£¶·ªº³¢·³«³µ¥·µ¦·¶­¸¼ª¾»­¾À¯À»®Á»¯Á¾­Ã¼­Á½¬¼¿®¾½­Á¿¬Á½¬ÁÀ¬¾¾®Áº¬Á¿¯ÁÀ¬¾»³Á»®Á»¬À¾®ÁÀ¯Ã»«À¾­Â¾°Â¾­Â»¯¿Á¯ÀÁ®Á½­ÁÁ¯¿¿¬Â¿°Â½³Â¾¯Å½¯Á¼¯ÁÁ­Ã½¯Ã½³ÁÁ¯ÂÀ®ÅÀ¯Ã¿°ÂÁ±Â¾°Á¿³ÁÀ°ÅÁ³ÆÁ³ÇÁ°ÆÀ¯ÄÄ´ÃÆ´ÅÀ²ÃÁ²ÃÂ²ÆÃ´ÃÀ³ÃÂ°ÄÃ³ÃÃ´ÂÅ±ÈÀ±ÃÁ¯ÅÃ·ÆÅ±ÄÁ´ÊÄ´ÆÁ°ÅÃ·ÆÃ±ÈÂ´ÆÄ·ÇÆ·ÈÄ·ÈÇ²ÈÆ·ÆÄ¯ÊÃ·ÇÆ·ÇÅ·ÈÅµÇÃ·ÇÆµÊÆµÇÆ¸ÆÈ´ÉÅ³ÉÆ·ÊÆ¶ÈÅ·ÊÅ³ÆÇ¹ÆÆ·ÊÃ³ÉÈ·ÊÆ³ÉÈ·ÊÇµÊÈ·ÈÈµÈÈ¹ÉÇ·ÊÉ¹ÊÈºÌÇ·ËÇ¸ÊÇ¶ÊË¹ÊÇ¶ÌÇ·ËÊµÉÊ·ËÇ¶ÊÈ´ÊÈ³ÌÆºÊÊ·ÍÌ·ËÊ¸ÌÈ¸ÌÊºÎÊ¹ÌÊ¹ÌÌ¸ÌÈ¹ÌÊ·ÌÉ·ÊÈ»ÍÉºÎÉ»ÍÊ»ËÌ¹ÎÉ¹ÎÉ¶ÌÉ¹ÍËºÐÌ¶ÍÌ¶ÊÈ»ÊÌ»ÊË·ÎË¹ÎË»ÎÍ¹ÎÊ¹ÍÎ·ÏÊºÐÎ¼ÑÉ»ÐË½ÐÌ½ÍÌ»ÐÍ½ÍÉ¿ÑÏºÎÐ»ÐÍ¾ÐÌ¾ÑÌÀÑÍ»ÐÌ»ÎÊ»ÐÍ»ÑÍ½ÑÎ»ÐÌºÒÎ½ÎÍ¸ÑÍ¼ÐÌºÓÏ»ÐÌ¾ÏÎ¿ÏË»ÐÉ½ÎÒ¾ÓÐ»ÒÌ»ÒÎ¼ÑÎ½ÐÐ»ÐÐ¾ÓÌ½ÐÍ»ÐÌ¼ÐÌ»ÑÍ»ÒÐ¾ÒÍ»ÒÍºÐÌ¼ÏÌ»ÓÎ½ÎÐ¼ÓÎ¾ÒÒÀÔÎ½ÐÎÁÒÐ»ÐÒ¿ÑÐ»ÕÑ¾ÒÐ»ÒÏ¾ÒÒ¾ÒÐÁÒÎÁÓÒ¾ÐÏ¼ÒÑÁÒÎÁÓÑ¾ÐÓ¿ÒÐ½ÕÒ¿ÓÐ¿ÏÐÀÒÒÁÓÕÁÕÒÀÕÐ¾ÒÑÀÓÎÆÓÓÀÕÒ¿ÔÒÁÒÓÁÒÓ¾ÕÖÀÖÖ½ÕÑÃÒÕÃÕÒÀÓÕÀÓÓÀÕÖÁÖÓÂÕÕÁÕØÀ×ÕÁÕÑÀÕÐ¾ÑÊ³Æµ§»¨rufq]o`zqbto[wn`zr`wwixb~tbqf|xi|g~knnttrw©|´§É¯Ü­Àó»ÊúÈÖúÑáúÓãúÕâúÕèúÕéúÙèúßìúßðúßïúáîúäñúãóúçòúæõúçôúêõúéùúèöúéôúìùúéúúé÷úìùúíúúîúúòúúïúúôúúóúúñúúôúúôúúõúúðúúïúúòúúóúúóúúòúúöúúóúúõúúõúúôúúõúúöúúøúúøúúùúúúúúúúúúúúúúúúúúúúúúúúùúúõúúöúúúúúùúú÷úúúúúúúúúúúùúúùúúúúúúúúøúúúúúùúúùúúöúúõúúöúúôúúóúúóúúñúúñúúðúúïúúîúúîúúìúúìúúìúúéúúîúúíúúíúúéúúêúúêùúê÷úæôúåöúâõúâöúáòúÚîúÙëúÕëúÒçúÐäúÓäúÑßúÎßúËÜúÆÖúÃÔ÷ÃÏó¼ÌòºÊî»Äë´Ãà®¾à¬¾Ú©µÓ§·Ï§³Ê ¯Ã©¼£± ¢{unnoqnwiw`{~idtrzdlf|q]wo`xo_tqi{g`wl`ud`qi]rnYtxf{tg~w£¡¿­¶È»ÃÓÁËÓÃÐÒÁÒÔÃÓÖÂÒÐÃÑÔÆÒÒÃÓÔÃÓÖÂÔÓÁÕÒÁÓÓÃÕÒÂÓÒÃÕÓÁÒÕÂÒÓÁÔÒÀÕÔ¾ÔÍÁÒÓÁÒÏ¿ÒÓÃÒÒÂÒÔÁÐÐ¾ÔÔ¾ÑÐÄÓÓ¾ÔÑÅÐÒÁÐÒ¼ÒÒÀÒÕÁÔÓÁÐÎ¾ÒÍÁÒÐÃÒÒ¿ÑÎ¿ÐÓ¿ÓÐ¾ÒÏÁÒÐ¾ÐÐ½ÑÑÃÏÎ¿ÓÎÀÏÐ¾ÎÎ¾ÑÒÀÒÍ¾ÎÏÁÎÒ¾ÏÎ¼ÑÑ¾ÎÎÀÐÐ»ÐÑÀÐÌ»ÍÎ¾ÎÍºÎÎ½ÌÌ»ÍÎ»ÏÒ¼ÍÍºÎÉ¼ÍÎ»ÍÍ»ÍÊ¼ÌÊ»ÍÊ»ÎÌ»ÐÍ¼ÎÉ»ÌÊ¹ÌÊ»ÊÌºÌÉ¹ÈÊ¸ÊÊ»ÌÊ¹ÊË»ÊÊ»ÉÊ¹ÎË½ÊÈºÌÊ»ËÌ»ÊÈ»ÎÊ¹ÍÆ»ÌÉºÐÊ»ÎÇ»ÈÈºÌÉºËÊºÈÉ·ÌÆºÈÆ¸ÇÇºÌÇ¸ËÆ·ÊÈºÊÇ¹ÊÈ¶ÉË»ÊÉºÈÈ¸ÊÇ¹ÇÉ¶ÊÉ¶ÊÈ¹ÊÇ¹ÌÈ·ÈÇ¸ÈÇ¸ÆÆ¶ÈÄ·ÆÄºÊÇ¸ÈÃ·ÅÅ¶ÆÆ»ÆÈ¶ÈÅ¹ÇÈ³ÉÆ·ÆÆ·ÆÃµÈÃ¶ÅÃ´ÃÆ³ÉÄ³ÄÁ¶ÂÄµÈÁ³ÄÃ¶ÅÃµÃÂ³ÁÂ³ÄÃµÃÁ³ÇÁ´ÅÂ³ÁÁµÅÂ²ÂÂ³ÁÃ²ÄÂ³ÃÀ³ÁÁ³ÇÁ±ÅÁ²Ã¿®ÃÃ±ÁÁ³Á¾°ÂÀ²Â¿µÁÂ³ÂÃ±ÃÁ³ÁÁ³Å¿¯ÁÀ³Á¾²ÂÃ±Ã¿³Á¾®ÀÁ°Â¾°Á½­Á¿¯Â»°Á¾³Â¿³ÀÀ³Á¿¯Á¾³Á¾®Â½®Àº°À¿­Á»¯¿»¬Á¼¯º¼®Á½³¾¾¬Á¸¯¼»¯¿¼¯¾»®º¸­¿¼¬¼º¬¾¼°¿¹¬½»¬¾·¬¼¹¬»¼¨»»°À»¬½¹¬»®¥³·§¹¶¥»·©¸¶¦»·¨»»©»¸¨¹·¦½¸¦¹¹ª½¹¥½º¨½¶§½»«¼·©»¸©¾»ª»·§¾ºªº»¬¾º§À¶©¾¸£½»¬¾º«¿¹¨»»ª¾»¬»½©¾·©½º§½½¬¾º©»º«½»­¾¹§¾¹ª»»«¾»ª¾¼¬¾»®»¼®½¼­¾»«½º¬À¼§¼¸­Á¼¬Áº®Ã½¬»¾­Á¿®¾»¬¿¾±Ã½­¿¾¯¿¾±¿¾«¾½¬¿½¬À¾ªÁ½®Á»¯Á½¬Â¾®Á¿±Á¾­Â¾¯Á¾­ÁÁ¯Á½¬ÁÀ³ÀÂ²Á¿¯Â¾°Ã¿¯ÄÁ®ÆÁ°ÃÀ¯ÅÀ®ÂÁ®ÁÁ¯ÄÂ®ÈÅ³Ã¾°ÈÃ°ÃÁ­ÁÀ°ÅÁ²ÃÁ±ÆÃ²ÁÂ°ÅÀ¯ÂÁ²ÃÁ³ÆÀ°ÆÂ±ÃÂ²ÃÃ±ÄÁ¶ÆÁ¬ÄÁ®ÆÅ²ÆÂ²ÅÁ°ÁÂ°ÅÃ±ÆÃ²ÆÀ³ÃÆ³ÇÃ¯ÄÂ³ÇÃ²ÇÁ²ÉÃ³ÆÁ²ÇÃ³ÆÄ²ÇÄ´ÈÃµÆÅ³ÊÇ³ÄÂ³ËÄ³ÅÅ²ÇÃ·ÈÆ³ÉÃ³ÆÃ±ÈÅ°ÊÆ¶ÈÅ·ÈÃ´ÊÊ³ÈÆ¶ÊÇ³ÇÃ·ÆÆ³ÇÈ´ÊÄµÇÆ³ÊÆ³ÆÂµÈÆ³ÊÄ´ÈÄ´ÈÆ¸ÈÆ¹ÊÆ¯ÊÅ´ËÉ¶ÈÇµÌÅ·ÊÅ³ËÊ¶ÊÆ¶ÉÈºÎÈ¸ËÇ²ÌÉ·ËÇ·ÊÈµÎÄ´ÌÉ¶ÌÈ·ËÈµÊÈµÌÈ·ÊÈ´ÈÈµÊÈµÌÈ·ËÈ¶ÎÈµÎÊ·ÊÇ¶ÊÊ¸ÎÉ·ÊÊ¸ÎÉ»ÍË¶ÊËºÌÈ¸ÎÊ¹ÎË´ÍÊ·ÊÉºÊÇ¸ÌÌ¸ÌÆµÌÌµÎÊ¸ÊÈ¶ÊÈ¹ÍÊ»ÌÈ¶ÍÈ»ÍÊ½ÌÊ¹ÎÈ¹ËÊ·ÎÊ¹ÏÌ»ÏÉ¹ÏÊ·ÌËºÎÎ¸ÎÎºÎÌ»ÍÌ¼ÎÌºÎÊ»ÒÌ½ÍÏ¹ÎËºÌÎ½ÏÌ½ÏÍ½ËÉ½ÐÎ¼ÑÌ»ÎÌ¾ÍÐºÎÌºÎÎ¸ÐÏ»ÐÎ¾ÐÍ¼ÎÐ»ÑÌ¾ÐÐÀÑÍ¾ÐÏ»ÐÏ¿ÐÏ¾ÏÐºÏÍ¹ÎÎ¾ÏÑÁÒÍ»ÑÌºÍÐ¾ÎÎ»ÏÌºË¾°Á°±wii[iWrgUubMkbUrgQql]on_qn[wiSrk`w|]wt`xt`xgfgnlz²¢À¯Û¥·ï·ÄúÆÑúÏÚúÔáúÓçúÖãúÖçúØçúÚèúÝèúàìúâïúãîúàîúáðúãòúæóúãñúâòúçòúãôúâóúåõúä÷úãöúæöúèöúê÷úêùúîúúîúúñúúïúúíúúîúúîúúëúúéúúîúúïúúñúúðúúðúúòúúóúúóúúïúúñúúðúúóúúôúúúúúùúú÷úúöúúúúúúúúùúúùúúúúúöúúõúúöúúöúúöúúùúú÷úúùúúöúúøúúùúú÷úúöúú÷úúöúúóúúóúúõúúôúúõúúïúúòúúíúúïúúíúúìúúëúúìúúëøúèøúéøúéøúëúúçùúåøúæ÷úäöúãöúä÷úãñúâõúßðúÜñúáîúÛëúÖéúÒæúÓäúÒâúÐáúÑßúÊÝúÈÖúÃ×ú¿Ðö»ÌôºÊñ·Èï´ÃêµÁã°½Þ¬ºØ©·Ý¥´Ò¦³Î¥­Ê©Ã©½¤² zqk`_|_|r[l_ux`z_|{fzgwdqYxgYoiYwfUnd[tgUtYOkYQk_Qg[MldYlgUtqd|§¨»¨³Ç¸ÃÍÀÈÐ¾ÐÎ¾ÎÍ¾ÍÑ¼ÎÏ¼ÑÎ¾ÍÒÀÐÎ¿ÍÌ¿ÒÒ¾ÐÏ»ÎÏ»ÍÍ½ÎÌ¼ÎÐ½ÏÏ¿ÐÎºÐÍºÌÎ»ÎË»ÏÎ¼ÎÌºÌÎ½ÐÍ¾ÍË»ÎÎ»ÍÎ½ÎÍ¾ÏÌºÏÎ»ÍÎ¾ÏÌ¸ÎÌ¾ÌÏºÎÎ»ÌÌ»ËÎ»ÌÌ»ËÎ»ÊÊ»ÎÐ¾ÐÊºÎÌ¾ÊË¼ÌÉ»ÌÉ»ÊÊ½ÌËºËÌ½ÍËºÍÌ¸ÌÉ»ÌÊ¹ËÊ·ËÈ·ÌÇ»ÊÈ»ÌÉ·ÈÌ¹ÌÈ»ÈÈ¹ÊÇ¸ËÊ»ÍÊ·ÊÇ³ÊÇ¸ÊÈ»ËÈ¸ÉÆ·ÉÈµÉÇ·ÆÈµÊÆ·ÈÆ´ÆÇ·ÈÈ¶ÇÇ´ÇÆ¸ÆÆ·ÆÅ·ÆÆ³ÅÅ³ÇÄµÇÆ¹ÇÆ¶ÊÆµÃÅ¶ÄÊ´ÈÆ¶ÊÇ·ÆÆ·ÈÃ·ÇÂ³ÇÄµÉÃ³ÃÃ·ÆÄ´ÇÆ´ÅÄ·ÇÄ³ÆÄ²ÆÂ³ÅÃµÆÄ³ÇÆ´ÈÃ²ÅÃ³ÈÅµÁÂ´ÆÁ´ÄÂµÆÄ·ÃÂ±ÄÁ²ÅÁ·ÆÆ³ÆÃ²ÇÁµÁÃ·ÆÃ³ÆÀ±ÃÀ®ÃÁ°ÆÁ³ÅÃ´ÄÁ³ÃÁ²ÀÁ±ÃÁ²Ã¿¯ÄÁ°ÂÁ²¿¾±À¾²ÃÀ¯Ã¾¯¾À°¿Ã°Á¿±Áº°ÀÀ«Á¾­Á¿±Á¿°Á¿®Á»¬Á¼­Á¿®¿¸«¿¾®½¿¬¾½¬¾»®À»­À»®Á½®½»­À»¬¼¾­À½«Á»¯»º®À½­¾¾«½½«¹¾«¾»­Á¹®Á¸«¼º¬½º¬»»«¾µ¨»³®º¹ª½¹§¾¸­»»¥¾¸¯»º­º¸©»·«¼º¬¾·¬¼»¬»·§¹¶©ºµªº¹©º¹©¼·©»·¨¾¶¬»µ§¸·¤»µª¹´«¸·§·´¨··§¸·£¸µ¤¹·§¹¸¥¶³§·³¤¸µª¶³­»¼¬¿¾°Á»¯¿¼­½¼¬¾¾¯Á¾®Á½®½º®¾½­Á¼®À½­¿»¯Ã¿²Á½¯Á»¯Á¼¯Á¿°ÄÀ®ÁÀ®Á½­Á¾¬Á¾¯Á¿¯Á¾¯ÃÁ³Â¿­Â½®ÀÀ®À»±Ã¿®À¿¯Ã¿­Ã¿°ÁÀ²Â»ªÄÁ¯ÀÁ´Ã¿¯ÂÂ²ÁÁ®ÂÀ¯È¾´Ã¾³ÅÁ³ÂÁ¯ÁÁ³ÅÁ­ÆÂµÄÃ³ÆÀ³Æ¾¯ÇÁµÅÃ´ÅÆ®ÄÁ²ÃÁ±ÆÃ²ÅÁ®ÄÄ²ÆÃ³ÆÅ°ÅÁ³ÆÂ³ÇÇµÃÃ·ÈÆ¶ÈÄ³ÆÁ³ÇÅ¶ÈÁ°ÆÅµÈÆµÉÆ·ÆÅ¶ÈÃ³ÅÇ³ÈÄ³ÆÆ·ÈÃµÈÅ·ÈÃ·ÊÅ´ÊÅ¸ÆÆµÈÆµÇÂ³ÊÆ´ÈÅ·ËÈ¶ÈÈ·ÇÈ·ÈÈµÊÈºÊÆ³ÊÇ¸ÈÄºËÇµÇÅ¶ÊÈ¹ÉÈ·ÌÇµÌÅµÊÆ·ÈÈ´ÌÆ¸ËÇµÊÊ¶ÉÇ·ËÈ¹ËÈ¹ÊÈ»ËÈ¸ÊÈ¸ÌÇ¶ËÇ·ÌÊºÎÆ·ÊÇ¶ÊÍ·ËËºÌÈ·ÌÊ·ÌÈ·ÌË»ÌÈ¹ÎÊ·ÌÊ¶ËËµÎÈ¸ÏÇºÏÇ·ÏÌ·ÎÉ»ÌÉ¹ÌÌ»ÎÉ»ÐÌ½ÎÍ»ÍÊºÎÊ·ÎÍ¹ÎÊ¸ÎÈºÎÍ¾ÐÌ¼ÎË¼ÊÊ¹ÎË»ÎÇ¼ÌÉ»ÏÈ¹ÏÉ¼ÑÎ½ÐÌ»ÎÌ¹ÌÌ»ÒÎ¾ÑÌ¼ÐÏ¼ÎÍ¾ÐÎ½ÑÌ¿ÐË¹ÑÍ½ÐÍ¾ÍÎ»ÒÊ»ÍË½ÏÎ¼ÒÉºÍÌ¼ÐÌ¾ÎÊ¹ÒÍ»ÎÍ»ÍÒ¾ÒÐ»ÓÌÁÒÌ»ÑÎ»ÐÎ¿ÒÎ½ÐÌ½ÓÍ¿ÒÒ¼ÍÍ½ÒÐºÐÌ»ÍÍ·ÒÐ»ÑÎ½ÑÑ»ÐÐ¾ÒÐ»ÒÌ»ÒÐ½ÓÐ»ÔÍ¼ÕÒ»ÑÒ¾ÒÎ¿ÒÒ¼ÒÎ¼ÔÒ¿ÓÓ¾ÔÐ¾ÓÐÁÒÐÀÒÑÁÑÎ½ÔÐÁÒÓÀÓÒÃÔÐ¾ÍÑ¾ÔÐÁÒÐÁÕÐ¾ÓÔ¾ÕÓÁÓÒÆÒÐ¾ÖÑÀÓÒÁÓÓÁÕÓÄÕÓÁÔÒÀÕÒÀÓÓÃÓÓÃÓÒÀÕÕÅØÓÀÕÔÁÔÒÀÓÕ¿ÖÕÁÔÓÀÖÓ¿ÒÔÁÒÒ½ÑÎ»ÏÅ®Â°³ krfq`|nb|qdxlbxnb{rgzui~ugui~~g|n{i~loq{~¤|«¨Ë°ã¨Àð»ÊúÁÐúÕÜúØçúÛëúßïúßêúâîúÝïúßñúâïúæóúæñúæñúçôúèóúäôúçõúè÷úçöúçöúåöúéöúì÷úé÷úé÷úíùúíúúîúúîúúðúúôúúôúúôúúôúúòúúðúúìúúîúúóúúðúúõúúõúúõúúôúúöúúöúúöúúóúúõúúøúúúúúúúúúúúúúúúúúúúúúúúúúúúúúúúúúúúúúúúúúúúú÷úúúúúúúúúúúúúúúúúúúúúúúúúúúúúúúúøúúöúúõúúöúúùúúöúúöúúöúúôúúòúúðúúëúúïúúíúúïúúïúúïúúîúúíúúïúúîúúêúúíúúêøúèõúåöúä÷úäõúâôúáñúàðúÛíúÕèúÚèúÙçú×çúÍàúÌÝúÆÚúÆÙú¾Óø¿Ð÷»Òó¾Êñ¼Èì¸Æè¹¾æ¯Áá¬»Ý¯ºÕ©¹Ø§·Ò¥­Ì¢®Å©»¦¦uliki{flliqolxfob~td{ifut`zi[ub_rfUrdYrgbqi[zrk~x¢¨´¢³Ä´ÅÎÂÊÓÃÓÖÀÐÕÃÑÕÂÔÓÄÕÕÄÕÔÃÕÖÄÒÕÅ×ÖÃÕÒÃÕÓÄÓÒÄÕÖÀÕÑÀÒÐÁÒÓÃÓÓÃÓÓ¿ÒÐ¿ÏÒÁÒÓÁÔÓÂÒÑÃÕÐÃÒÓ¾ÑÑÀÓÔÂÐÐ¿ÕÐÀÐÒÁÓÐ¾ÒÒÀÓÒÁÓÒÀÕÒ¾ÐÒ¾ÒÒÀÐÓÁÎÑ¿ÐÒÀÓÎÁÐÑÃÐÑ¾ÒÐ¾ÐÑÁÎÐÀÑÐ¿ÔÐÂÒÑÀÑÏÀÒÌÀÐÐ¿ÎÒ¿ÒÌÀÎÎ¾ÐÎ¿ÒÐ¾ÏÍ¾ÑÍ¿ÍÌ¾ÎÍ¾ÏÌ¼ÐÌ¼ÎÎ¿ÐÎ»ÐÍ»ÎÊ»ÊÌ¼ÐÌ½ÎÉ¼ÌÊ»ÎÌ½ÎË½ÉÊºÌÌºÍÌºÌË¼ÎÆºÊË»ÉÊ·ÌÊ»ÌÆºÈÉ·ÈË·ÊÊ»ÊÉ»ÉÈ»ËÊ»ÍÇ»ÎÉ¹ÆÆ¹ÌÈ¼ÌÈ»ÊË¹ÈÇ¹ÌÇ¹ÈÉ»ÇÆ·ÈÆ¸ËÈ·ÅË»ÈÇ·ËÅ·ÈÈºÈÈ¸ËÉ»ËÈ¹ÈÇ·ÉÈ·ÊÇ¹ÊÅ¸ÇÊ¸ÊÈ¶ÌÆ¹ÊÈ¸ÇÅµÈÆ¸ÇÇ¹ÆÇºÇÈ·ÉÆ¸ÊÆ³ÆÇ»ÆÉ¹ÌÆ¶ÆÁ·ÇÃµÈÆµÈÅ³ÇÆµÆÂ´ÅÃµÅÃ¶ÈÂ³ÃÅ´ÅÃµÂÄ´ÈÃ·ÈÁ³ÃÆµÈÂ´ÅÂ´ÅÂ²ÆÀ±ÃÄ³ÅÁ³Æ¿°Ã¿³ÃÁ³ÆÁ±ÁÁµÃÁ°ÃÁ°ÆÁ´Ã¾³ÂÀ³ÅÁ´ÃÁ³ÁÂ³ÄÁ³ÃÁ·ÅÁ¶Ã½¯À¿¶ÂÂ³ÀÁ³ÅÁ±ÂÂ²ÂÁ³Ã¼®Á¾°Ã¾¯¿»³Á¿­¾»­ÂÀ±¾½­Á¾­Á¼°¿¾³Á¾®Á¾³Àº®À¿®¾½°Á¿¯¾¼¯¿¼ª¾»±¾½®¾»®¾¼¬¾¾¯Á¼¬¿º­½¹®¾»°¼¹¬¿»¬¾¹«À»®¼»­¾»¬»¸¯¿·¬»»¬¾°£··©»¹¨º·©¸¹¨»¸©»¹§º·ª»¹§¾º¨¾·§¹º©¾¸§»·§¾·©¾·¦»¹«»¹«¿»«½»¨»»«¼¸¥¾·©º»©¿»«½»©»¸¨¼¿«Àº«¼»ª¾¸¬¾¸ª¼¸§½¸¬¾»©¿»©½¹¬¾½©Áº¬¿»«¿¹©¾¸­¾¼«¿¿­Áº¬¿»ª¾»§À¹¬¼½«Á¾­¾½¬¾¾®¾¾¬Á»¯Á¾¬À½­ÁÀ¬¿º­Á¾¬¿½«¾¾¬Á¾¬¾»¬À½¬À½®À½­Ã½ª¾¾¯Ã¿¬Ã¼­Ã¾²ÁÁ®Á¿®ÁÁ²ÂÁ®Ä¿°ÃÁ²Â¾®Ã¾°Ã¿±ÃÃ¯ÆÂ¯ÃÀ¯ÃÀ²ÅÃ±Ã¾²Â¿¬Æ¾®Ã¿¯ÃÁ´ÆÃ®ÆÁ²ÅÁ®Ä¾²Å¿°ÄÂ³ÃÂ³ÆÁ¬ÅÃ³Ç¿´Æ¿²Æ¾²ÆÂ³ÃÁ²ÄÂ³ÅÃ­ÅÃ¯ÃÁ¶ÃÄ³ÊÇ±ÆÃ³ÇÆµÆÃ³ÈÃ²ÅÁ²ÈÆ´ÈÃ³ÊÄ¯ÇÃ³ÊÃµÈÆµÉÅµÊÄµÇÆ´ÉÄµÈÆµÈÇ°ÈÇ´ÊÆ³ÈÃµÊÆ°ÈÈ´ÉÄµÈÃµÈÆ·ÊÆ¶ÊÄµÉÆ±ÈÄ³ÊÆ´ÉÂ´ÇÇ³ÈÃµÉÇ·ÊÆ³ÆÇµÌÇµÊÅ·ÇÇ¸ÊÇµÊÆ²ÌÆ·ÉÅ³ÊÈ·ÈÇ·ËÉ¸ÌÈµËÇµÊÇ³ÌÊ·ÌÉ´ÊÉ·ÏÉ¶ÊÌ·ÈÇ·ÉÊ·ÊÆ³ËÊ·ÌÈ³ÌÉ´ÉÈ·ËÈ´ÉÇ·ÊÆ·ÊÌ³ÌÈ·ÊÈ¸ÌÆ¸ËÊµÏÈ·ÎÉ¶ÐÈ´ÎÈ»ÍÈ¸ÎÌµÎÈ·ÌÌ·ÒÊºËÊµÌÈµÍÆµËÊ»ÌÊ»ÎÊ·ÌÈ·ÌÉ¸ÏÌ¹ËÊ¸ÌÌ¸ÌÎ¸ÏÉ»ÌÌ»ÌË»ÌÊºÏÊ¹ÎÌ¸ÎÊ·ÎË½ÏÍ¼ÎÌ¸ÌÌºÊËºÒÎºÏÊ¼ÏÌ¹ÏËºÌÊºÎÊ¸ÌÍ½ÎÏºÑÏ»ÎÎ¼ÒÍ»ËÎÀÑÐ½ÏÍ»ÐÍ¾ÑÐ¾ÏÐ»ÒÐºÎÍ¾ÒÎ¸ÐÎ½ÐÎ»ÏÍ½ÑÒ½ÑÐ»ÒË¼ÐÌ¼ÒÎ¾ÓÒ¾ÐÏ¾ÑÍ»ÎÍ·ËÅ´Äº¨¼©|ulbn[{kUunYqdQrfYod[qn_xqdql`tq[ut`{o[|u_~{Yknuw¬£¸§Ø¡¸æ´Â÷¾ÎúÉÕúÓàúØäúÛåúÝëúÛêúÛëúÝíúÛëúÞèúßëúßíúÝïúÜðúßðúßïúáñúâóúâñúãòúãòúâóúáóúæöúãõúæôúéöúêùúéùúìùúïúúðúúðúúîúúìúúìúúìúúêúúîúúïúúóúúôúúôúúôúúòúúóúúíúúðúúïúúôúú÷úúúúúúúúúúúúúúúúúúúúúúúúúúúúúúúúúúúúúúùúúøúúöúúøúúöúúøúúùúúöúúõúúöúúøúúøúúøúúöúúõúúòúúõúúôúúïúúóúúðúúíúúèúúçúúìúúëúúìúúêúúìúúìøúêùúéùúêùúéúúå÷úä÷úâóúâõúáñúßñúÞîúÛëúØìúØçúÙåúÕåúÖãúÒàúÐáúÍÝúÈØúÁÕú¾Òú¼ÏóºÈó·Çë¸Æì³Æç°Ãá®¾à¬¸àª¸Ú©´Ó£±Ð£´Ð¡®Ì«Á¦³¡¥~kd|d_uYz|bdgl{dt`|n`wgWwk]qg[qkYqgSq`Sn]Qg_Sn`Yk]QkfYw{g´¬Æ±½Ê»ÇÏ¿ÍÐ»ÎÐ¾ÌÐ¾ÒÏ»ÏÎºÏÐ¼ÌÐ¿ÐÏ¾ÍÏÁÒÏ½ÐÏ¾ÎÎºÏÎ¹ÐÌ»ÎÌ¾ÒÎºÌÏ¾ÏÊ¾ÐÐºËÐ½ÑÌ¾ÎÍ·ÎÎ¹ÍÌºÎÎ½ÐÏ¾ÍÍ»ÊÎ¾ÍÌ»ÍÌ¾ÌÐ»ÎÍ¼ÎÊ¼ÌÍ¼ÐÎ»ÏÌ¾ÌÌºÌÎ¾ÌÌ¿ÍÌ¾ÌÎºÎÊ»ËÌºÎÌ¸ÎÌ¹ÌÎ¾ÏÊ·ÎÌ»ÍÎ»ËÌ»ÐÌ¹ÊË·ÌÇ»ÊÉ½ÌÈºÌÊ»ÌÇ¹ÊÌ½ËÇ¸ÌÊ»ÊÊ¸ËÊ»ÌÌ·ÉÇ·ËÉºÊÈ¶ÇÆ¶ÈÈµÈÉ¸ÈÆµÆÆ¸ÊÈ·ÈÇ³ÊÇ¸ÇÈ·ÌÆ¶ÉÁ¹ËÇ·ÊÆ³ÈÅ´ÈÅ³ÈÈµÈÆ³ÈÆ·ÆÅµÈÇµÈÁ²ÃÄ³ÄÁ³ÄÃ´ÃÃ³ÄÃ²ÄÅ³ÈÅµÇÈ·ÃÃ´ÄÇ³ÄÃ´ÈÄ´ÈÁ³ÇÁ³ÄÄµÄÂ³ÄÆ´Æ¿¯ÅÄ²ÆÃµÄÃ³ÆÃ±ÄÁ³ÅÃ³ÄÆ±ÇÀ³ÄÃ´ÆÀ¶ÁÅ³ÄÂ²ÁÃ²Æ¿³ÃÃ±ÃÀ³ÄÃ´Ä¿±Â¿¯ÃÃ°ÁÀ²Â¿±Á¿°À¾°ÂÁ³Â¾³Ã¼®¾¼®¿¿²Â¾²Á¾¬Á½­¾À¯Ä»¯¿¾°½¾²À¾­Á¾±Á¼®Á¿®½½¯Ã»®À»¬À½­¾¼«¾½®¾¾¬½»ªÀ½­Á»°¾»­½¹¬À½­À½¬¾¾­¾¼«¾½®¿¹ªÁ¸¬½º¬À¹¬¾»®¼½­À»ª¾¹¬½¶¬¼»¬¼¸«¾¸«½¹­¾¹©º¹¬»¹¯¼¸­»·¬»·§¼»¬½·©½¸©»¹¬¾·¬¹¶¬¼·«»·¬¼»©»¶¨¸¶©¸µ§¹µ«»·©¹º¨··§¸µ©»¶©¸´¦º¸©¹´«¹¸©¹¸£¸³«··¦»µ¬¹¹«¿¼©Á¿«¿»¯Á¾°¿¼¬Á½­¿¼­¿¼«Ã¼­Á¾®¾½­Áº¬ÁÀ¯Á»¬¾¼¬¾Á±¿¾¯Á¾¯À½­Â½¬ÃÁ¯À¼­ÂÀ°Æ¾¯Â¿°Á¾°Ä¾¬Á¿®ÂÁ²ÁÁ¬Â¹°À¿°Ä½±ÃÀ¯Á¾­ÄÀ²ÁÀ²Å¾°Â¾²Â¿±Ã¿°ÄÀ¯ÆÀ²ÂÀ±ÅÂ³ÆÁ³Ã¾³ÅÁ´ÂÁ±ÆÁ³ÆÃ°ÄÀ³ÆÂ³ÅÁ³ÇÃ³ÂÂ²ÆÄ³ÄÁ±ÆÃ³ÆÄ²ÄÃ³ÆÁµÇÃ³ÂÂ³ÆÅ³ÃÃ³ÆÄ°ÅÂ°ÆÃ³ÅÅ²ÈÄ´ÈÆµÈÅµÈÆ¶ÈÆ¹ÈÃ´ÉÅ´ÈÇ·ÇÃ·ÉÆ·ÌÆ·ÄÄ¶ÇÆµÊÅ¹ËÅ¶ÉÆ³ÈÃ³ÇÆ¶ÌÆ·ÊÅ¶ÊÆ´ÆÇ·ÉÆ·ÊÆ·ÉÇ³ÈÆ·ÊÆ¶ËÈ¸ÈÇ·ÌÈ¶ÉÊµËÆ·ÈÄ·ÈÆµÉÈ·ÊÅ·ËÈ¹ÌÇ·ÈÈ»ËÈ·ÊÇ¶ÉÈ·ÊÈ·ÎÉµÌÇ¹ÌÇ·ÈÉ¸ÎÉ¸ÌÊ·ÊÆ¸ÌÍ¹ÌÈºÎÉ·ËÈ¹ÍÊ¹ÌÊµÍÈµËÊ·ÌÊ¹ÌÊ·ÍÊ¹ÌÊ·ÐÍ»ÎÊ»ÎÌ·ÌÈµÐÊ¸ÊÉ·ÌÊºÏËºÎÉ»ÏÊ¹ÎÈ¹ÍÊ»ÐÎ»ÍÊ¸ËË¸ÐÊ¹ÐÊ¹ÒË»ÌËºÎÍ¼ÐÍ¾ÒÍ»ÐÌ»ÐÊ½ÏÊ¹ÎÍ¼ÎÊ»ÐÍ»ÐÍ½ÒÉºÎÎ»ÐÌ¼ÓÊ»ÐÍ»ÏÌ¹ÐË¹ÏÌ»ÏÎ¹ÐË»ÑË»ÑÎ½ÑÌ¼ÎÌ»ÎÎºÎÌ·ÓÍ¾ÎÏ»ÑÐ»ÒÎ¼ÐÏ»ÑÌ»ÐÎ¾ÑÍ¾ÒÎ¿ÐÏ»ÎÎ¼ÒÎ»ÒÌ¾ÓÎ½ÓÌ»ÒÎºÒÍ¼ÔÏ¿ÑÍ½ÓÎÁÕÎ¾ÒÎ¼ÒÍ½ÐÒ¾ÐÍ»ÒÍ¾ÓÓ¾ÓÑÀÒÐÀÖÑÁÒÒ¾ÕÐ¾ÑÑ¿ÕÏ½ÔÐ¿ÒÑÁÕÎ¿ÑÎÀÓÐ¿ÓÒ½ÒÒÀÕÒÁÔÕ¼ÕÓÃÓÒÂÕÒ¿ÓÓÀÓÕÃÒÓÃÓÕÁÕÖÁÖÒÁÒÑ»ÐÒÁÒÓÀÓÔ¿ÕÑ¿ÕÔÁÕÒÁÑÓÁÕÔÂÕÔ¾ÕÓÁÒÓÀÔÒÁÌËºÇ¾ª½£¨uudxdn`{odut`|tbwqfxxkzi~tigudud~fntx©¬ À®Ìµå³Á÷ÃÐúÌÙúÕáúÞêúàëúâïúâïúàïúáïúâðúáñúãðúåòúâòúßôúàóúáõúâõúåõúä÷úê÷úéöúè÷úç÷úìùúëøúçøúëøúìúúìúúïúúòúúõúúôúúôúúðúúñúúðúúòúúóúú÷úúöúúöúúøúúùúúöúúõúúôúúõúúôúúóúúúúúúúúúúúúúúúúúúúúúúúúúúúúúúúúúúúúúúúúúúúúúúúúúúúúúúúúúúúúúúùúúúúúõúú÷úúúúúùúúúúú÷úúöúúöúúôúú÷úúõúúôúúòúúóúúïúúîúúîúúîúúîúúïúúðúúïúúîúúïúúîúúëúúìùúëøúäôúæõúäöúãõúáðúáñúÞðúÚîúÚìúØëúÛìúÕèúÒæúÑäúÉßúÆÝúÁ×úÃÒù»ÍöºÏôÁÈò½Éñ¹ÈìµÅç±Áè®Àá®¼Ý­»Ø§»Ô¦´×¨µÕ¤¶Ë®º£¦nnkfkkxxn{iugxb{i|wf{|f{qbxi_qk_rl_wkbrg`ri[zwi²§±Ë¸ÀÐÁÊÒÀÑÓÃÒÕÁÒÓÅÖÔÁÒÕÃÖÔÂÓÓÃÑÒÁÕÖÄÕÕÃÓÒÃÕÕÃ×Ö¿ÕÒÁÕÓÃÕÒÁÒÒÁÒÓÁÒÔ¿ÓÒÁÐÓÃÓÐ¾ÒÑÁÐÐ¾ÐÔÃÓÐÀÒÐÀÐÓÂÒÒ¿ÓÒÂÕÑÁÒÐÁÒÒÁÒÒ½ÒÒÂÑÏÀÑÐ¿ÑÕÀÕÒ¿ÒÒÁÓÒÃÒÑ¿ÍÒÀÓÒ¿ÑÒÀÒÐ¾ÎÒ¼ÔÎÅÐÎ¾ÎÏ¾ÓÎ½ÓÎÁÏÐ¿ÔÎ¾ÍË½ÎÒ¾ÒÎÁÏÐ¾ÌÍ¼ÐË¼ÐÐ½ÎÍÁÐÐ½ÐÌºÎÎ¾ÎË¼ÍË»ÎÎ»ÍÎ¾ÏÊ¼ÏÌÀÎÍ¹ÎÎ»ÐÍ»ÌÌºÍÌ»ÍÆ»ÎÍ»ÌÊ¸ÊÉ¼ÌË»ÎÈ¹ÌÊ»ÊÎ¹ÌËºËÉ¹ÊÈ¹ÊÊ¸ÊÈ·ÌÅ»ÈÉ»ÌÈ·ÉÊ·ÈÈ¹ÌÈ·ÊÅ¹ÊÈ¶ÍÉ·ÊÆ¹ËÈ·ÉÇ·ÉÇ¸ÉÆ´ÉÊ·ÉÈ·ÊÈ·ÉÆ·ÇÈ·ÈÊµÈÆ·ÈÆ¶ÇÉ»ËÆ·ÇÇ·ÈÆµÆÉµÊÇ¹ÈÇ·ÉÆ´ÆÇ·ÅÃµÇÇºÉÇ¶ÆÅ³ÇÆµÆÂ·ÈÃ´ÊÃ¹ÆÅ³ÈÃ¶ÅÅµÇÆ³ÃÅ´ÆÃ³ÅÄ³ÄÁµÆÅ´ÅÂ´ÆÃ¶ÂÇµÆÂ²ÆÃ³ÂÂ·È¿³ÅÄ°ÁÀ³ÆÁ²ÃÁµÃÃ·È¾³ÃÁ±Ä¾³ÆÃ´Ã¿³ÆÁ´ÄÃ±ÅÁ³ÃÀµÀÃ³ÃÁ²ÆÃ³Ã½³Á½²ÆÂ³ÁÁ¶ÅÃ®Ã¿µÃ¿³ÁÁ°Ã»³¿½°¿À±Å¾°Á¿®À¿°¿¿±º»®Å¾¯¿¾­Á¾°Á¾­À¼¬Á»²¿½­Â½°ÀÁ®¿»¯¾¿®Á¼¯À»¯¾½®¿¹­½¼¬Â»­Á¹«¾»®¾»ª½º¨¼·®¿¼®¾»¬½»¬½»¬¼·­»·«½½«½°¥·¶«¸¶©¼¸¦¸¶§¼·¤»·¢¼¹¦»¼¨»·¦»·¥ºº¨»¹§½¸§»·¬½¹©À·£½º§¸¸ª½¹§»º¨¾ºª¾¹¦»º¦¾¹«¾½¨½¸«¼º©¾¹§¾»©½¹ª¼ºª¼¸¬¼»§¾ºª¼¹¬½ºª½¹¨¾»ª¿·©»ºªÃ¼«¼»ª¿»ª¾¼¬»»©À¿¬Á¾«¾»¬¿¾­¾»®Á¾¬¼¾¬Â¾§Àº¬½½­Â¾«À¹ªÀ½¯Á½¬Á½­À½±¿»¯ÃÀ¯À¼°Á¾¬Á¿¬Â¿°ÃÁ°Ã½¬Ã½ªÁ¾¯Å½¬ÁÀ¯ÃÃ®ÄÁ°Ã¾®Ã¿²Ã¿°ÃÁ°ÀÂ²ÄÀ¯ÁÁ®Á¾²ÄÁ®ÅÁ¯ÃÀ±ÁÂ²ÆÁ°ÆÃ²ÆÁ²ÆÀ³Ä¿°ÄÃ²ÈÁ±ÄÃ³ÅÂ°ÇÃ°ÄÀ±ÃÄ­ÆÂ°ÃÁ¯Ä¿°ÆÃ²ÈÂ®ÆÃ³ÅÃ°ÆÁ³ÃÁµÆÄ³ÉÀ°Å¿³ÇÅ³ÇÁ²ÇÁ²ÊÅ±ÆÃ²ÈÄ·ÇÃ²ÇÄ°ÆÆ³ÅÇ²ÈÆ³ÈÃµÇÅ±ÈÄ³ÈÃ¶ÈÄ²ÈÃ¯ÇÇ²ÈÆ´ÈÇµÇÇµÈÆ´ÆÆ³ÊÃ´ÆÄµÉÆ³ÉÆ³ÈÆ¸ÇÄ³ÇÄ²ÆÃ³ÆÆ±ÊÇ²ÊÆµËÇ·ÊÃ¶ÈÇ³ÉÆ´ÊÈ·ËÇ·ÉÈ·ÊÈ·ÌÇ¹ËÈ³ËÈ¸ÈÈµÊÈ·ÉÊºÌÈ·ÎËµËÈµÌÇ´ËÊ·ÊÈµÎÈ¶ÊÈ·ÎÈ·ÌÇ³ÊÆ·ÊÇµÌÇ·ÎÈ¶ÍÉµÌÊ¹ÍÇ¶ÊÇ¶ÎÉ·ÎÈ¸ÍÊ¹ÎÊ´ÊÇ¹ÇÊ³ÎÉ·ÌÈ»ÌÈ¸ÌË·ËÌ¸ÌÌ·ÍÊ¹ÌÈ³ÎÊ·ÍË»ÍÇ·ÎÊ¹ÌÍ·ÍÎ·ÏÊ¹ÎÈ·ÎÊ¸ËÉ¹ÊÊ·ÎË·ÌÊºÐÈ¹ÌÌ¸ÏÌºÍÊºÍÎ·ÎËºÐÉ½ÏÌ¸ÏÊ¸ÌÍ»ÒÏºÎË»ÍÊ¸ÎÌ»ÏÌ»ÎÊ¹ÎÎºÐÉ·ÎÎ»ÏÎºÎÌºÐÊºÐÎ¼ÏÌ»ÑÍ½ÏÌ¼ÏÏ¼ÑÌ»ÌÐ»ÐÌºÐÎ¼ÐÌ¸ÍÐ¸ÑÏºÐÏ¾ÏÎ½ÒÎ¹ÎÑ½ÎÌ»ËÅ±Ä­¡µ¢zftd{qUzlWzkYuiYrlUtk]rq]ul[wt`tw_|rYzq[xz_`n {©´Ä¬Óµë²ÃúÁÐúÌÛúÓàúÜäúßêúÜíúßëúÝèúØëúÝíúßîúÞìúßîúâïúßòúÝïúàðúÝõúâóúãóúâõúçôúäôúãõúäõúæõúäõúã÷úæõúæúúéúúêúúðúúîúúðúúîúúëúúïúúîúúîúúðúúôúúôúúõúúñúúóúúòúúîúúïúúñúúóúúöúúùúúúúúúúúúúúúúúúùúúúúúúúúúúúúúúúúúúúúúúúúúúúúùúú÷úúùúúúúúöúúõúúôúúñúú÷úúöúúõúúôúúòúúñúúöúúòúúóúúïúúîúúíúúêúúèúúéúúëúúéúúèùúéúúíùúêùúèúúêúúåøúå÷úç÷úäõúàöúàðúÝðúÜïúÛìúØîúÕêúÖæúÔéúÔçúÓãúÒáúËàúÇßúÄØúÀÖú¼Ò÷½Ëõ·Ìñ·ÈïºÇí·Âé³Áç³¿ä¯¾â¬»Û¦·Û¨µ×ª´Ó¥µÓ¦³Í¢®Æ©²tnf`fgqnkduY~n_xnWxl]tgYqgSnbSrlSigWnbOf]Qn`SndUxw¡¼¨´Æµ¾Ê»ÈÎ½ÌÍ¾ÎÐ¾ÏÏ»ÎÐÁÏÐ½ÎÐ¾ÕÑ»ÑÍ½ÎÒ¾ÕÐÁÐÏ¼ÐÒ»ÎÎ½ÒÎ»ÐÍ¿ÏÎ»ÎÊ»ÎÎ»ÏÍ¸ÓÎ¿ÏÌ¼ÎÌ¹ÏÌºÎÌ»ÎÌ»ÐÎ½ÎÏ»ÐÐºÎÎ¿ÐÍ»ËÌºÐËºÍÌ¼ÐÎ¹ÑÍ¸ÐÊ»ÌËºÐÊ¹ÍÊ¼ÎÊ»ÍÊ¹ÒÇ¼ËÍºÎÍ·ÌÊ»ÊË¸ÊÊ·ÌÈºÌÌ·ÎË¸ÌÌ»ÈÌ·ÎÈºËÉ·ËÊ¼ËÈµËË¹ÌÈ»ÊÊ·ÌÆ¶ÌÈ·ÊÊ»ÊÈ¶ÈÇ·ÊÊµÊÇ³ÉÉ¹ÉÆ·ÊÈ¶ÊÈ³ÈÆ·ÊÇ¹ÊÆ·ÈÈ¸ÊÆ·ÊÃ´ÊÆ¶ÈÈµÈÃ¶ÆÃ³ÊÉ´ÈÅ´ÊÅµÅÃ¯ÅÃ·ÆÅ³ÈÄ¯ÆÇ²ÈÃ·ÂÅµÇÃ³ÇÃ³ÄÇ³ÆÄ²ÃÄ¶ÈÁ±ÃÆ²ÆÁ³ÂÃ²ÆÃ³ÃÃ²ÂÄ¯ÅÁ°È¿²ÃÃ´ÄÃ¯ÆÁ³ÄÂ±ÁÂ²ÇÃ²ÄÁ²ÅÃ°ÄÄ±Ä¿³ÆÃ²Å¿²ÃÂ³ÄÃ³ÆÂ²Ã¾µÅÁ±ÄÁ®ÁÀ°ÄÀ°ÂÃ²Ä¿±ÄÁ°ÂÀ¯ÃÁ®¿Á°Ã¾±Ã¿²Â¾°Â¿²Ã¼­Á¼®ÃÂ´ÃÂ®Ã¼¯¿¾¯Ã¼²À»®¾»®¾½¬Á¾¬¿¼®Â½®¾º¬¾¾°¾½ªÁº®½»¬¾½«¿¿¬¾»¯¿»®À»¬½¼®¿¼«Á½¬À¼¬Á½®Á½¨»¹«¼»§À¾«½¸«À½©½º¬½»¬¼¹ª¾¸§½»¬»¸§¼¾¨½¸©»¶«ºµª¼¸¨»¸©»¸­»º©¼·¬»¶«½¼§¾·­·¹©º´§¹¹¬¸¸¦¾·¦¸µ¥¸·¨º¸§º¶§»³§·µ§¼¸§··©¹¶¥¸¸¦¸¸¥¶µ¥¶µ¥··©ºµª·º¬¾½ª¿¼«¿¾¬Á¼§Á¿«Á»­À½¬Â¿¬Á¾±Á»«À½®Ä¼¯À¼¬Ã¼­Ã¿¬Â¿±À¾­ÁÀ¯Â¾­Ã¾¬Ã¾®Ã¿°Å¼¬ÆÁ®Â¿¬Ã¿¯Ä¼©Ä¿³ÃÁ­È»°Â½¬À½²ÂÁ¬ÃÀ®Â¿­ÃÁ®Å¿¬ÃÂ®ÁÁ®ÄÁ¬ÂÄ°ÅÂ¯ÅÂ°ÃÀ±ÆÄ²ÃÁ³Æ¾¯ÃÃ±ÃÂ±ÈÀ³ÃÃ±ÇÂ±ÅÁ±ÃÆ°ÆÁ°ÆÃ®ÅÆ³Ê¾¯ÁÃ²ÆÆ´ÆÃ³ÄÂ³ÇÃ®ÇÆ²ÆÄ³ÉÃ³ÄÆµÈÆ³ÆÂ´ÉÆµÇÄ³ÈÅ³ÆÇ¶ÈÄ³ÇÆ°ÅÆ³ÇÆ¶ÇÇ³ÅÅ·ÈÇ³ÉÄ¶ÊÅ´ÇÅ´ÊÃ³ÈÆ³ÈÆµÈÃ²ÉÊ·ÉÆ¶ËÈµËÈ¹ÈÈ·ÉÈ´ÌÅ¶ËÆµËÈµËÆ·ËÈµËÅ³ÈÆ¹ËÈ¶ÍÈ¶ÌÆ¶ÌÆ·ÊÈ³ÎÄ¹ÉÈ¹ÌÈµËÈ¹ËÉ¶ÌÊ´ÍÇ·ÌÍ·ÏÆ´ÌÆµËÊ¸ËÉ·ÎÈ·ÍÌ¹ÌÈ¹ÍÈ·ÏÈ¶ÊÊ·ÎÆ·ÎÊ¹ÉÈ·ÐÈ·ÐÊ¸ËÊºÎÌ·ÍÊºÍÉ¸ÍÍ·ÎÉ·ÎÈ»ÍÊ·ÎÊ·ËË·ÎÌ´ÎÉ¶ÍÈ¹ÍÊºÐÉµÐÊ»ÐÊºÌÍ¹ÌË¹ÏÍ»ÓÍ»ÐÊ»ÍÊ¹ÐÍºÐÌ½ÑÌ¶ÏÍ»ÏÍ·ÌÍ½ÐÏ¹ÏÌÀÑÎ¼ÐÐ¹ÒÌ¹ÏÌ»ÐÌ¹ÒÎ¼ÐÎ½ÐÌ¸ÐË¹ÐÌºÎÌ·ÑÊºÎËºÏÍ½ÐÍ»ÑÌ·ÐÊ»ÒÎ»ÑÍ¸ÏË¹ÎÐ»ÒÏ»ÑÎ»ÒÌºÒÌÁÐÐºÒÍºÐÍ»ÐÐ¾ÒÎ½ÓÐ¼ÒÌ½ÕÐ½ÒÌ¾ÓÒ¿ÒÎ¾ÓÍ»ÒÑ¾ÓÎ»ÓÒ»ÒÐ¾ÎÒÀÔÎ»ÒÏ»ÒÐ¾ÒÐÀÓÒ¼ÕÎ¾ÒÒ»ÒÐ¾ÓÎ¾ÒÒ¾ÓÒÁÕÒ½ÒÑ½ÓÍ»ÓÎ¾ÒÓÁÕÒ»ÕÒ¿ÕÕÁÔÐ½ÓÑ½ÕÒÁÕÒÁÔÓ¿ÕÓÁÓÓ½ÕÕ¿ÓÓ¿ÕÐ¼ÓÑ¿ÒÒÁÕÔÁÖÓÀÓÒÀÖÓ¿ÕÓ¾ÕÕ¾ÓÓ¾ÕÒÀÔÖÃÕÐ¼ÎÈ®Á®³¡lwkq]q_{ob{zd~zi{dtixb~lnf~fkq~¨´©Á±Ò¢·à«Áú¾ÎúÑÛúÕäúÜåúãëúäïúáðúáïúßîúàòúäðúáðúãòúæôúäõúâõúâ÷úçóúäöúçöúæôúé÷úê÷úèúúæúúéöúéøúêøúëúúíúúîúúìúúðúúôúúóúúòúúôúúòúúôúúõúúõúúôúúöúúøúúúúú÷úúøúúöúúõúú÷úúöúúúúúúúúúúúúúúúúúúúúúúúúúúúúúúúúúúúúúúúúúúúúúúúúúúúúúúúúúúúúúúúúúúúúùúúúúúøúúúúúùúúöúú÷úúöúú÷úúöúú÷úú÷úúóúúòúúñúúòúúðúúíúúïúúðúúïúúëúúíúúíúúìúúêúúéúúíúúìúúéùúæöúæöúãôúÜöúÞñúÞñúÜíúÜïúÛîúÖêúÕéúÕêúÍæúÌáúÊÝúÆÚúÁ×úÁÔú½Òó¾Éõ½Ëö»Íð»Ìð¶ÈëµÅê³Áæ®¾à±¿á¬»Ú¨»Þ¬¼Þª»Õ©³Ë±½«£|rrtrtwzon{kzdo_~k_xk[uf[wq_tqbxo[tg]rf]uf[uo »¤±Ç´ÃÑÀÏÕ¾ÏÓ¿ÐÓÁÕØÃÓÖÆÖÓÂÔÒÀÕÖÀÕÕÃÔÓÁ×ÔÃÕÕÁÓÔÀÔÕÁÒÑ¿ÓÕÄÕÒ¾ÕÓÃÒÔÀÕÕÀÓÔÂÕÔÁÓÓ¼ÑÕÂÒÓÀÑÒ¿ÒÒÂÒÓ¾ÕÔ¾ÕÐ¾ÑÒÁÒÒ¿ÕÑÃÑÒÀÒÓ¼ÐÑ¿ÒÔÁÓÒÁÕÐ¿ÓÐ¾ÐÑ¾ÐÒÁÒÌ½ÑÑ¾ÔÒ¼ÒÍ¾ÒÒ»ÒÐÁÒÒ»ÒÏ¿ÒÏ»ÒÎ¿ÎÍ½ÓÐ¼ÐÌ¾ÎÎ¾ÓÐ¾ÒÒ¾ÐÍ¾ÒÎ¾ÐÑ½ÑÌ¾ÐÏ½ÐÍºÌÎ½ÐÐ¹ÑÍ¼ÎÎ»ÎÏ½ÍÌºÐÌ¸ÌÊ¿ÎÏ¹ÎÊ»ÎÊ»ÍÎºÉÌ»ÏÌ¹ÌÍºÎÈºÍÊºÍÈ·ÌÊ·ÎÌ»ËÊºËÎ¹ÌÈ»ÈÉ¶ÌÌ·ËÈ»ÌÊ¸ÌÌ·ÎÈºÊË¸ÎÈ¶ÊÉ¹ËÊ¸ËÇ¶ËÈºÌÈºÌÈ¼ÌÆºÉÈ¶ËÊ·ÊÆ¹ÊÅ¹ÈÊ³ÊÆ·ÊÇ¸ÊÇ¶ÌÈ·ÈÆ»ÉÈ¸ÊÇ¶ÈÆ·ÊÉµÈÇ´ËÇ¶ÉÄ¶ÊÌ·ËÈ·ÉÆ³ÉÄµÇÅ´ÈÆ´ÈÆ³ÆÁ´ÆÆ¶ÈÆ´ÈÃ°ÅÆ´ÆÆ³ÈÅµÄÃ·ÆÅ±ÆÅ²ÆÃ³ÈÆ´ÆÁµÈÁ´ÆÆ±ÆÃ³ÆÁ³ÄÃ·ÃÃµÆÁ±ÅÃ±ÆÂ±ÆÁ³ÃÀ³¿Á°ÃÂ±ÁÁ±Ã¿´ÄÃ³ÃÀ³Å¿³ÄÃ¬ÀÁ´Ä¿³ÃÀ³ÆÁ®ÃÀ°ÁÁ±Ã¾°ÁÂ°Ã¿±Æ¿³ÃÀ³ÁÀ¯Â¼¯Â¿°ÃÂ¯Æ¾²Â¾°¾À¯Á¿²Â»¯À¿®Â¾¯¼¿¬Â¾®¿¾«Á¼²Á¾°À½¬¿¿®À½­¾¼®Á¾³Á»¬ÁÀªÁ»­¾»«½¹©½»­¼¾«½¼ªÁ¸­¼º¬¾½¬À´¯½»¬¿·¨¼»­»ºª¾²©µ·§º³§»¸ª»·£º·¥½¶©¼·ªº·©»·¦»¸¤»¸©»º©½·¨½·¥»»¦¾¹¨½·¦»·«¼»©¾·«¸»¨¼»¦¾·ª»»¨¾º¬À¹ª½·ª½¸¬Àº©º¸¦¾¾©¾»¬À·©¾¸ª¼»¨Á¹«¾½¨½»©¾¹§Á»ª¾»«¾·ªÀ»ª¿º¬Â¼ª½º¬¾À«À»¬Á»§¾¾±Á¾«Ä½°¾¾¬Á»¬À»®À¾®Á½­Á»¬¾¾¬Á½¬Á¾¬À»«Á½¬Ã½¬Ä¾«À¾®Á¾®Â¾¬Á¾¯Â¾®ÁÁ°ÃÀ®Ã¾¬ÀÀ±Ä¿°ÃÁ®ÆÂ®Â¿­Ä¿°Ã¿¯ÂÁ¬Æ¿®ÄÀ¯Ä¿®ÆÁ¬ÂÁ°ÃÁ²ÄÂ±Ã¾±ÄÄ¯ÄÃ±ÄÃ³ÄÁ¯ÅÁ²ÆÁ³ÄÄ²ÄÃ®ÇÂ²ÄÂ´ÃÃ­ÆÃ±ÇÄ°ÄÃ²ÇÀ²ÆÁ°ÄÁ±ÆÂ®ÄÂ³ÈÄ³ÇÄ²ÄÂ°ÆÄ´ÊÃ´ÆÁ²ÆÆ´ÄÆ°ÈÂ³ÆÂ±ÉÆ°ÆÂ´ÆÆ±ÆÁ±ÊÃ°ÉÆ³ÈÆ¯ÈÆ³ÇÇ³ÊÄ±ËÃ´ËÄ²ÇÄ²ÈÃ¹ÊÃ³ÊÂ³ÈÆ¶ÉÅ¶ÈÃ´ÇÄ´ÈÆ²ÆÅ·ÍÈµÊÅ³ÈÆµËÇ³ÊÆ·ÇÅ·ËÆ³ÈÆ³ÇÇ´ÈÈµÌÈ³ÊÅ¶ÈÆ·ÌÈ·ËÉµÌÇ¸ÌÈ³ËË·ÊÊ·ÌÉ¹ËÊ·ÊÉ¹ËÇ³ÊÉ¹ÊÆ¶ÌÈ¶ÎÈ·ÌÊµÌÈµÇÈµÊÇ´ÊÈ³ËÊµÌÆµËÈ¶ÌÉ¸ÌÈ·ËÈµÉÉ·ËÊ´ÈÈµÌÆ¶ÏÊ¸ÌÇ·ÎÈ¶ÌÄ¶ÉÊ·ÌÍ³ÊÉ´ÌÊ·ÐÊºÎÉ¶ÎÉ¸ÎÊ¸ÏÊ¸ÌË·ÎÊ¹ÌÊ·ÊËµÎÌ¹ÏÌ»ÌÉ·ÍÊ¹ÏÊºÎË¸ÎÍ¹ÎÎºÌÌ¹ÍÌ»ÌÊºÍÌ¹ÎË»ÏÌºÐÌ¹ÎÌ»ÐÌ¸ÌÊµÍÊºÌÌºÐÊ·ÎËºÎÎ¸ÏÌ»ÏÎ½ÑÌºÎÏ·ÐÎ¿ÑÐ»ÐÎ»ÎÌ»ÏÐ½ÓÌ½ÓÌ½ÎÏ»ÒÐ»ÏÎ»ÓÌ»ÐÍ»ÒÑ¾ÍÎ»ÎÎ½ÏÊºÌÈ·È»¬»¥¯zqdk[~fWtgUtgWwl`u|b{r`zq]xxbz|d~xd|bz]`q¡z©³¢ÁªÕ·æ³ÁúÁÎúÐÙúØáúÖäúÚäúÜéúÛíúÖêúÛèúÝëúÝìúßëúßïúàðúàðúßñúÞôúáñúâôúãòúâóúâóúåôúæõúäöúäõúæõúèöúå÷úåõúèøúéúúìùúïúúïúúðúúñúúîúúïúúóúúðúúñúúôúúôúúóúúõúúöúúöúúöúúöúúøúúøúúúúúúúúúúúúúúúúúúúúúúúúúúúúúúúúúúúúúúúúúúúúúúúúúúúúúúúúùúúöúúôúúùúúùúú÷úú÷úúöúúõúúöúúõúúòúúóúúóúúðúúîúúïúúïúúíúúíúúîúúìúúêúúèùúèùúçúúèøúäùúç÷úêøúæøúåöúâ÷úäóúßïúÝðúÚóúÛîúÖëúØêúÙêúÙèúÓêúÒåúÔåúÎâúÊÝúÇÙúÃÖúÁÔúÀÑ÷¼Êõ»ÌóºÈï¸Æî¶ÅìµÂé´Ãä¬¾á¬»ß¬¸ß©ºÙª¸Ú§³Ýª·Ø ³Ì¡¯Æ«²wrqlilorgz`xr`|kQqfQqgQobMl`Wg`_n`SobMi]Qn`Srn`~{©¦»¬·ÆºÄÎºÊÏ»ÎÐÀÌÐ»ÎÎ½ÏÍ½ÒÑ¾ÒÑ¾ÏÍ¹ÏÐ½ÑÐ¿ÏÍºÌÌ»ÐÒ¾ÎÓ»ÎÎ»ÓÏ¾ÎÒ»ÑÎ»ÎÌ¿ÑËºÍÍ¼ÏÌ¾ÏË»ÍÐºÍÏ»ÍÎ»ÌÍºÎÎ»ÐÊ»ËÌ¹ÊÎ»ÍÍ·ÎÊ¾ÌÎ¼ÏÌ»ÎÍ»ÏÎ¿ÑÍºÎÍºËÌ»ÌË»ÎÌºÊË¸ÌÍ¹ÌÊ»ÏË¹ÌÉ»ÎÊºÎËºÎÊ¹ÊÊ¶ÊÊ¸ÊÉ¹ÌÊ¸ÊÊ¹ÈÉ·ÊÌ¸ÎÎ³ÍÈ¹ÌÊ¸ËË·ÉÈ·ËÊ·ÌÄ³ÊÄ¸ÈÆµÈÆ´ÉÂ·ÈÇ¸ÇÇ´ÈÈ·ÊÇ³ËÇµÊÇ³ÇÆ¶ÊÃ³ÊÄ³ÇÇ¹ÈÆ¶ÉÄ´ÅÈ´ËÆ´ÆÅ²ÄÅ¶ÈÉ·ÇÆµÆÃµÆÇ²ÆÃµÆÂµÆÄ³ÆÃ²ÆÄ´ÆÅ³ÆÆ¶ÆÁ³ÅÄ´ÇÁ³ÅÃ³ÃÀ²ÄÃ±ÃÄ²¿Á´ÄÁ®ÄÀ³ÂÁ³ÁÃ²ÆÀ°ÃÃ²ÆÁ¯Ã¾³Ã¿²ÅÄ²ÆÁ¯ÂÁ²ÆÃ³ÅÁ³ÂÀ³Ä¾³ÃÂ±ÄÀ®ÄÂ³ÃÁ³Ã¼°ÁÁ°ÃÂ¯ÄÁ®ÁÂ®ÁÁ¯ÆÀ¯ÂÀ­ÁÁ®À¾¯Â½¯Å¼¬À¿­¿Á±Â¾³Á¾®¾»¯À¾¬Ã¼°¿¾­Á»¬À¼«Á»¬À½¬Á½¬¾½°¾º®¾¾¬À¼¬¿¼®¾½²¿½¬»»«Á¿­Ã»®¾»­À½¬¾»¨¼¾¬¾½ª»ºª¾»¯¾¹§¾¼­½»®½»®¾º«¿»¬¹¹¦»·ª»º©½½ªº¸©½º­¾·«º¸«»¹¬»¹«½·¥¼¶©»¶«½·ªº¸ªº»§»¸©½·¨º·¬»¸¨»·¦º·§·º¥¹·¥¸µ¥··§»µ§¼´¥¸³£¹·¨·µ©º·¦¹·§µ³¨¸¶®¸À¬À½°Â½®Â»¬Àº®Â¼¬Ã¼¬¾¹­¿¾¨Ã¼¬¼¼¬À½­ÃÁ¬Â¾¬À½¬ÃÀ­ÀÀ­ÁÁ±¿¼­ÄÁ¬¿À¯Â½¬Å¾®¿À¬¿À¬Ã¿¬Ã¾®Â¿²ÀÀ­Å½®Â¿¯Á½®Á¼®ÁÁªÆÁ­Â¾®Ã¿­Â¿«ÂÁ¯Æ¾¯ÄÁ®ÆÁ¯ÅÃ¬ÄÀ®ÂÂ®ÆÀ°ÈÁ®ÃÁ²ÅÃ®ÅÆ®ÅÃ°ÆÁ²ÃÅ±ÈÂ°ÆÆ±ÅÃ°ÈÃ¯ÅÃ²ÃÄ®ÇÅ²Æ¾´ÇÁ¶Æ¿¯ÃÁ²ÈÁ³ÇÃ³ÊÂ±ÇÃ¯ÆÆ´ÈÆµÆÂµÇÆ¶ÈÃ¶ËÆ·ÇÈ´ÈÃ³ÉÆ³ÇÅ³ÈÆ³ÊÃ²ÈÅµÊÆ³ÊÇ¶ÊÃ´ÊÆµÈÂ¶ÊÈµÉÃ³ÇÃ´ÊÇµÈÈ´ÊÇ¶ÈÊ¶ÊÈ¶ËÆ´ÉÈ¹ÌÇ³ÈÇµÇÃ¶ËÈµÎÈ¶ËÇ·ÉÇ³ÊÇµÊÅµÊÈ¸ÌË³ËÊµÉÈ¶ÍË¶ÌÇ´ÈÆ¶ËÊ³ÍÊ¸ÉÆ³ÉÈ³ÍÊ¶ÏÉ·ÌÊ³ÎÆ¶ÊË¸ÌÈ¹ÍÊµÊÊ·ÌÈ·ÍÊºÌÈºÎË·ÏÍ¹ÎÉ·ËÉ¸ÍÊ·ÎÊ¸ÐÊ·ÎÉ·ÎË¸ÌÈ¹ÌË¹ÐÍ¶ÍË¹ÐÌ¶ÍÊ»ÌÊ¹ÌË·ÐÍ·ÊÊ»ÎËºÐÊ¸ÏËºÏÊ·ÐÊ¸ÐÌ»ÎÐºÎÏ»ÐÌ»ÑÍ·ÒÍ·ÐÎ¹ÏÊ¹ÑÌ»ÑÌ»ÐÏ»ÓÎ¸ÍÎ¹ÐÎºÐÏºÑÌ¹ÓÌºÐÍºÐÊ¸ÐÌ¹ÑÎ·ÐÏ¼ÏÎ¼ÑÊ·ÐÊ»ÍÌ»ÎÍ¹ÑÐ»ÐÌ¼ÒÐ»ÕÌ»ÐÎ»ÒÌ¹ÏÎ»ÒÌ¼ÑÍ½ÓÎºÔË¼ÐÎºÔÎ»ÑÌºÐÏ¾ÓÎ»ÒÐ»ÓÌ¼ÒÎ»ÑÌ»ÓÐºÓÒ¼ÓÏ»ÒÏ»ÓÐ½ÒÐ¼ÒÏ¼ÕÓ½ÑÏ»ÒÎ½ÑÐ¾ÓÒ¿ÖÐ»ÔÓ½ÓÎ¾ÕÓ½ÑÑ¾ÒÒ»ÐÑ»ÓÒ»ÔÐ½ÒÐÁÕÑ»ÒÓ¿ÕÐ»ÑÐ»ÎÐ¾ÓÓÀÖÎ¾ÕÓ¼ÖÓ¿ÓÔÁÓÕÀ×ÓÀÓÔ¿ÕÕÂ×Ò¼ÖÒÀÕÕÁÓÓ¾ÖÕÂÒÕÀÕÓÁÕÓÁÒÏ½ÊÈ¨Á¡¯xzbo_q]xb{qi~{k~duf{{fllgfknz§°¡¾¯Ë·á®Áô¿ËúÍÛúÙàúÚèúÝìúßìúáïúâðúßïúàïúàïúãïúâóúãôúçõúçóúåôúçõúç÷úçôúçöúèõúéùúçúúìúúêùúëúúìúúíúúéúúìúúìúúìúúïúúòúúïúúóúúôúúóúúõúúõúúõúúôúúöúúöúúöúú÷úúöúú÷úúúúúúúúúúúúúúúúúúúúúúúúúúúúúúúúúúúúúúúúúúúúúúúúúúúúúúúúúúúúúúúúúúúúúúúúúúúúúúúúúúúúúúúúúúúúøúúöúúøúúöúúöúúóúúôúúôúúðúúòúúðúúíúúïúúðúúîúúîúúëúúéúúëúúéúúèúúèúúíúúìúúêøúçùúåöúçöúàôúßðúÝïúáñúÛîúàîúÙïúØéúÔéúÔéúÎãúÎãúÈÜúÇÛúÃÕúÃÕú¾Òö¾Íö¼Ìô¸Èñ»ÆïºÆì³ÃéµÂé°¾ä³½â³¿ß¯¾ß±¿Ü¬¼Ùª»Ø¥µÅ®¯¡{uzzuounkgw[l_{nWxiUwi`tq`wnWxlUug]wfYurb~|t£½«¸Ë»ÈÐ¾ÐÒ¾ÒÕÂÓÖÂÙØÂÔÒ¾ÒÕÃÕÓÃÖÖÂÕÑ¿ÓÓ¿ÒÓÀÑÕÁØÒ½Õ×¾ÑÖÃÕÒÂÕÕÀÕÒ½ÓÓ½ÓÑÀÓÕÁÒÓÀÒÒÁÕÐ¼ÓÒ¼ÎÎ¾ÓÓ¾ÒÓ¿ÕÒ¾ÐÐ»ÎÐÁÓÓÀÓÑÀÕÓ½ÓÑÁÔÓÁÐÑÀÓÓ½ÐÒÀÓÐ¿ÖÐ¼ÕÐ½ÑÐÀÑÑ¿ÔÒ½ÐÎ½ÐÍ¿ÒÎ½ÓÐ¾ÏÑ¾ÐÏ¾ÑÎ»ÌÐºÒÍ¹ÒÏ¼ÑÐ¾ÑË»ÍÏ½ÒÎ¾ÒÐ»ÒÍ¾ÍË¼ÏÍ¿ÐÍºÑË¹ÐÌºÎÊ·ËË»ÏÌ¹ÐÌºÌÌºÐÊºÑË»ÍÈ»ÎÉ»ÎÌºÏÈ¶ÍÊ»ÐÊ¸ÍÌºÌË·ÌÊ»ÌË·ÉÌºÎÈ¶ËÈ¶ÌÊ»ÎÍ¹ËÈ·ÊÊ·ËÉ¶ÊÊ¹ÊÊ¸ËÈºÌÈºÊÈºÉÉ¶ÍÅ¸ÇÈ¶ÉÇ³ÊÆ¸ÇÆ¶ÆÇµÊÆ·ÊÆ¶ÉÅ·ÊÈ³ÈÈ·ÈÄ´ÊÆ·ÈÊ·ÈÆ¶ÉÅµÇÆ¶ÇÆ·ÊÈ³ÈÆ¶ÆÆ¶ÉÆ¶ÊÆ´ÈÈµÉÂ·ÈÆµÄÃ¶ÊÆ³ÇÆµÆÅ³ÇÈ¶ÊÃ³ÉÂ³ÃÄ³ÈÃ³ÅÂ²ÅÃ³ÆÃ³ÈÃ³ÆÂ³ÅÃ³ÅÁ³ÆÃ®ÆÄ±ÇÄ±ÃÃµÆÂ³Æ¿³ÄÀ³ÄÂ±ÇÃ²Æ¿±ÁÂ®ÅÁ²ÅÁ³ÃÃ²ÄÁ­ÁÃ¯ÃÀ³ÃÁ­ÁÁ°ÁÁ±ÃÁ°ÄÀ°ÂÃ±ÆÁ±ÀÃ°ÃÃ±ÆÁ®ÁÂ­Ã½±ÁÂ®Á¿­Â¾³Â¿­Ä½¬¿¼­ÄÁ­Ã¼¯Á¼«Á¿«Ã¿¬¾½±Á¾¯Á½¬¿¼¯½½°Á¼«Á»®¼½¬¿½«À½®Á¼¯½¾«¼¼¬Á»«À¼¬À»«»»©À¹ª¾»¬¼½¦¾¹ªÂ»¨»»§¼¹¬½¾¨¾¹ª¾²¦´¶£»´¦¹¹©»¸£¹¶ª½¸§¹¾§»·©·¸¨¼»«»·¦¼·©»¸¥½¸§»¸ª»º¥¼¸§¼¼¬»»«»¸§½¶¨¾½¨¾»¨½¹«»¼«»·§À¹§¹·©¼½§¾´¬»º«Á·©¾»ª¸½¬¾¼ª¾ºª»½ª¿¹¬¾¹«¿º«¾½¬¿¼«¾¾¨¾¾«¿»«¾º«Á¾²¾¼©¿»¬Á¾¬¿½ªÁ½­¿¾­Ã½«¾»³Ä¾«Á¼¯Ã½¬Á¾«Â»°Â½«Á»¯¾¾¬Á½¬Á¼¬À¿«Á¾¬Ã¾±ÂÀ±Â½¬Á¾«ÃÀ°ÃÁ®Â¿±ÃÃ°ÃÀ¯ÁÀ®ÄÂ®ÇÁ¬Â¿¯Æ¾®ÃÁ±ÄÁ®ÆÁ³ÂÃ°Ç¾¯ÃÁ¯ÇÀ®ÇÃ²ÄÁ³ÆÃ°ÇÁ²ÅÁ±ÆÁ¬ÆÂ±Ä¾®ÄÁ´ÇÃ²ÈÁ²ÆÂ±ÅÆ°ÃÁ³ÆÂ°ÄÄ°ÇÂ°ÇÁ¯ÆÃ²ÈÁ±ÄÃ²ÈÃ±ÊÆ¯ÈÆ³ÇÄµÈÀ³ÇÄµÈÈ³ÆÄ°ÉÄ³ÆÈ²ÆÅ³ÄÁ²ÈÅ³ÊÂ°ÈÃµÇÆ²ÉÃ²ÈÄ´ÈÇ±ÈÅ´ÉÃ²ÆÆ²ÇÆ²ÊÃ³ÈÅ·ÆÆ³ÉÃ³ÊÄµÉÇ³ÆÈ²ÈÆ·ÈÉ°ÊÇ³ÊÄµÊÇ·ÈÅ¶ÆÇ¶ÌÈµÈÆ·ÌÄµÊÈ³ÊÆ·ÈÈ·ÊÇ¸ÌÈ³ËÈ·ËÅ·ÊÉ´ÊÈµËÈ´ÉÈ¸ÍÈ·ÊÈµÉÊºÍÉ³ÊÄ´ÌÈ³ÏÊ¸ÌÉ¸ÊÆ¶ÌÈ·ÉÈµÊÊµÍÉ·ÊÊ²ÊÉ·ÌÉ¶ËÇ³ÎÆ¶ÎÊ·ÌÇ·ÍÈ´ÌÈ¶ÎÇ¶ÌË·ÌÌ¶ÌÊµÎÉ¸ÌË¹ÐÈµÊÇµÎË»ÎÊµÎÈ¶ÌÊ·ÎÊ´ÏÈ·ÊÌ·ÌË¸ÎÉ¸ÌÊ¸ÎÊ´ÎË¹ÎÍ¸ÎÌ¹ÌÌ¹ÌÊ·ÎÎ¹ÎÊ·ÎÌ·ÌË»ÐÉ»ÑÌ»ÏÍ·ÐÌ¾ÎÈ»ÏÊ»ÏÌ¹ÎÊ¸ÎÎ¹ÎË·ÍË¹ÌÎºÐÐ»ÏÎºÎÏ¹ÎÐ»ÏÎ»ÏÏ½ÎÎ½ÑÒ¸ÓÍ¾ÐÌ»ÐÎºÒÎºÎÎ»ÎÎ»ÎÏ¾ÑÎ¼ÏÎ¾ÐÌ»ÐÐ¾ÐÍºÎÃ´Ä°£µ~t`n[kSwdYtnYtnWuoYtn`xrYun`wz]|wb~x`dkwu¥~® ¸©Ìµç´Ãù¿ÎúÌÙúÏßúØâúØçúÙäúÚçúßêúÝëúàéúÝíúßîúàíúàïúàðúáñúâôúãóúãóúãóúâõúãôúåôúäôúæöúçõúèöúé÷úê÷úçùúæ÷úëùúê÷úëúúìúúíúúïúúðúúñúúóúúòúúõúúõúúöúúöúúôúúõúúöúúøúúúúúùúúúúúúúúúúúúúúúúúúúúúúúúúúúúúúúúúúúúúúúúúúúúúúúúúúúúúúúúúúúúúúúúúúúúúúúúúúúúúúúúúúúúúú÷úúõúúõúúöúúòúúòúúïúúîúúïúúîúúíõúíúúìúúëúúéúúëúúêùúëúúéøúçúúãøúæöúä÷úãöúâõúâôúàòúàñúßðúÚíúÚìúÙïúÛìúÜìú×éúÕèúÑæúÒæúÊáúÉÞúÈØúÈØúÁØú¿Ðú¾Îö¹ÈòºÈð¸Çî¶Äì¸Ãç²Àä°¿æ°¼à°»ß­¼Ü®¸Ú¬·Ù©·Õ¥´Ò§³Ì¬¾¢¨tqzqkgl~gt`|tYznUw_Sn`SlbQg]SkdUn]Ol_QgbUqdYtnb~|­ªÃ°¿ÍºÈÑ¼ÎÒ¾ÏÐ¼ÏÐ»ÐÍ¼ÒÑ¾ÑÒ¿ÏÎ¾ÐÑÀÏÏ»ÐÏ»ÏÎ»ÐÎ»ÎÎ¹ËÎ¾ÎÎ½ËÐ»ÐÐ¾ÎÌ»ÌÌ¸ÑÌ»ÏÎ¾ÎÐ½ÎÎ¹ÍÌ¾ÊÌºÎÎ»ÐÌ¾ÏÌ½ÏÎ¹ÍÌºÌÎºÍÐ»ÏÌ½ÐÎ¾ÐË»ÌË»ÌÎ¸ÎË¹ÍË»ÏÍ»ÎÍºÎÊ»ÌÉ½ËÌºÏÊ·ÌÊ»ÌËºÏÌ»ÎÊ¹ÎÊ·ÌÈµÈÊ¹ÎÊ¹ÎÊºÍÆ¸ÌÊ¹ÎÈ¸ÊÆ¹ÉÈ¸ÉÊµÎÊ·ÊÈ¸ÉÊ¶ÊÅ¶ÇÊ·ÈÇ¶ÊÈµÈÊºÊÇ·ÊÅ´ÈÆ¹ÈÈ·ÊÅµÇÈ·ÊÈµÆÄ·ÉÆ·ÊÆµÇÄ±ÊÈµÊÈ´ËÃ³ÄÄ·ÇÂ·ÉÃµÊÇ²ÄÆ³ÆÄ³ÇÄ¶ÅÇ²ÇÁ´ÇÁ³ÆÄ³ÄÁ³ÆÄ°ÃÄ²ÆÂ±ÇÃ²ÅÃ³ÇÂ¯ÅÄ²ÄÂ´ÆÁ¯ÃÄ´ÄÃ²ÄÁ¯ÃÄ®ÆÁ¶ÄÃ¯ÅÂ°ÃÁ®ÃÃ´ÄÀ¯ÃÁ³ÂÁ³ÃÁ°ÃÀ¯ÃÃ³ÃÂ³Æ½®¿À°ÀÁ¯ÃÁ®ÃÂ¯Ã¾¬Á½°Ã¾°¿À¬ÃÀ¯ÁÁ²Ã¾¯ÂÀ¯ÁÀ®½¾±Ã¾¯Ã¾°½¾­À»­Ã¾­¿¾¯Â½®Á¼®¼½­À¾«Ã·®»¿®Á»¬Â»¬¿½¬Á¾°¾»®Á»«Ã¾­Á»¬¾¼®À¾¬Á¾®Á¼¬ÁºªÁ»ª¾»¯½¼­Á¸¬Á»­½¼«À»ªÁ¸©»»«¿»«¾»¬¼·«»º«¾·¬½»©¾º§¿¸«¼ºª¼¸«»¹¥¼·­»»«»·¥¾·§¹ºª»µ¤¸¸«»·©½¸«»·§¹¸«»µ¥¹¸¦ºµ§½·§·´¥»·¨»µ¦¸·©¸µ©ºµ¦»¸§·´«¸¸¥º·ª··¬º¾®¿»¬¿»­À½¬¾¾¬¾½ª¿¾¨Á»¬½½¬Â¾°Á¾©¾¹¬¾¿¬Á¼¬Á»¯À¿¬À»¬Á¾®Â¾¬À¼¬Á¼¬ÀÀªÁÁªÁ¾°ÃÂ®ÁÁ²Ä½¯¿»¬ÁÀ­À½­ÃÃ­Ã¿¬ÄÁ¯Ã¾±ÃÁ­Ä»®Ã¾¯ÂÀ°Ã»¯Â¾­ÃÃ­ÆÂ³Ã¿°ÅÁ²ÄÂ°ÃÁ±ÅÁ°ÃÅ°ÅÀ²ÂÁ²ÆÂ®ÃÀ³ÆÁ³ÆÃ°ÁÂ³ÅÃ³ÅÂ±ÉÁ°ÅÃ°ÈÆ¯ÅÃ±ÅÅµÆÆ¯ÈÀ­ÅÃ³ÆÃ³ÈÃ±ÈÅ³ÅÅ³ËÄ¯ÃÂ¯ÆÆµÈÅ²ÆÃ¶ÈÅ³ÇÆ³ÇÄ´ÇÆ¶ÊÅ³ÇÅµÊÁ´ÈÆ³ÊÅ±ÈÉ³ÆÆ³ÊÅ³ÊÇµÉÆ·ÊÆµËÈ¶ÊÊ´ËÆµÈÇ¸ÉÈ³ÉÄµËÆ³ÈÊ»ÆÇ´ÊÈ·ÈÆ³ÊÈ³ÉÆ³ÊÆ¶ÈÇ´ÊÆ³ÌÈ¶ÍÆ³ÊÆ¸ÇÊ³ËË¸ÎË´ÈÈ»ÊÊ´ÌÈ·ÎÈ·ÎÌ·ÎÇ¹ÍÈ¸ÎÉµÎË·ÊÈ¶ÐÈ¶ÍÈ³ÍÊ¶ËË·ÍÊ¹ÎÉ¶ÌÊ¶ÍÌºÍÌ·ÌËºËÈ¶ÎÌ¹ÎÊ»ÐÉ³ÍÊ·ÍÌºÌÌ·ÏÊµËÊºËÌ»ÐÊºÌÌ¹ÎÈ¹ÍÉ»ÎÈ·ÍÌ¹ÐË»ÐÈ·ÌÍ¹ÏÊµÐÌ»ÏÎ¼ÒÍ»ÎÍ¹ÑÌ»ÎÌºÐË»ÐÍ»ÎÎ¹ÔÎºÍÌºÒË¶ÒÌºÎÌ»ÐÎ¸ÒÌ¹ÐÌ½ÐÍ»ÑÌ¹ÐÊ»ÏÊºÐÌ·ÐÎ»ÐÍ·ÒÍ¸ÒÌ»ÐÌ·ÒËºÐÎºÌÎ¹ÐÍ¸ÎÈ¸ÎÊ¹ÓÑ¹ÐÍ¾ÒÌ¹ÓÒ»ÖÏ»ÒÑ¾ÒÏ»ÐÐ»ÐÎ¼ÐÏºÓÍ»ÒÎ·ÑÎ»ÐÐ½ÐÎ»ÒÐ»ÐÏ¼ÑÎ¼ÑÑ¹ÐÐ¾ÔÒÀÐÏÀÑÐ»ÑÌ¿ÓÒ¼ÖÓÀÔÓ¾ÒÑ¾ÕÓÁÕÒ½ÓÑ¾ÓÐ¿ÓÐ¾ÐÑ»ÓÐ½ÑÎÀÓÓ¾ÕÑÀÓÓ½ÒÒ½ÓÐÁÓÖ½ÓÐ»ÓÓ¾ÖÒÂÕÓ¾ÓÓÀÕÔ¾ÕÒÁÕÔÁÖÓ¾ÕÒ¾ÓÓÁÔÕÀ×Ô½ÒÔÁÔÓÂÖÑ»ÏÈµÅ´¼z¡wfqbr[|n_{ud~x`|t`wb{zdwiigoo{¢¬¬¡µ§ÃµÛ¬¾ñ½ËúËØúÕÝúØãúßêúÛíúáíúàïúáðúáðúäðúâñúâñúäðúäòúæóúäôúçôúçóúëöúêöúæ÷úæöúêöúêøúëùúìúúìúúëúúëùúîúúíúúïúúïúúñúúöúúñúúóúúñúúõúúóúúõúúùúú÷úú÷úú÷úúùúúùúúùúúúúúúúúúúúúúúúúúúúúúúúúúúúúúúúúúúúúúúúúúúúúúúúúúúúúúúúúúúúúúúúúúúúúúúúúúúúúúúúúúúúúúúúúúúúúúúúúúúøúúøúú÷úúòúúôúúöúúóúúóúúñúúðúúïúúñúúîúúíúúïúúíúúíúúíúúéúúéúúéùúëúúêúúéøúç÷úäõúáõúáôúÝñúßòúÝïúãòúÝïúÝíúÜíúÕêúÓéúÎäúÌâúÊßúÇÜúÃÚúÆÖúÂÓúÀÒ÷¼Ì÷¼Ìô»Ìò·Æí¶ÃëµÅçµÃåµÁå±Àâ±Áâ±¿ß¬ºÜ®¹Û¬¸Õ§·Ë°º§§ x{~oniin{btb~qUwl]xfWr`]ti]ui[tk]qk[tt]~wk­­Æ¯ÀÒ¾ÊÔÁÏÓÁÐÕÃÓÕÂ×Ö¿ÒÓÁÔÔÁ×ÖÃÖÒÃÕÕÁÓÕÂÕÓ¿ÖÑ¿ÒÓ¿ÔÒÁÔ×¾ÔÐ¿ÐÌ¿ÖÓ¾ÒÓ¾ÓÓ¾ÑÐÂÓÕÁÕÑÀÔÒÁÒÓ¿ÕÔÀÕÒÀÕÒ¼ÐÓ¿ÑÑÁÑÑ¾ÖÒ¿ÐÐÁÓÓ¿ÖÓ¾ÓÑ¾ÒÐ¿ÒÒ¾ÐÏ½ÑÐ¾ÑÒ¿ÒÑÁÎÐ¿ÑÒ¾ÒÐ¿ÎÎ¾ÒÎ¿ÏÎ¿ÒÎ¼ÍÒ»ÏÌ»ÎÍ¼ÑÏ¾ÑÒ¼ÐÏ»ÏÌ½ÐÊºÎÍ¾ÐÎ½ÑÐ½ÏÎ»ÌÌ»ÎÌ»ÎÊ¾ÍÌ·ÐÍºÎË¼ÌÎ¼ÏÌºÐÉºÐÎºÐÌ»ÎÌ·ÌË·ÌÌ·ÎË»ÊÎ½ÎÌ¸ÍËºËÈ·ÌË¹ÏÍ¹ÌÊ»ÌÌ·ÌÇºËÈ¹ÌÉ¹ÊË¶ËÆ¹ÆÈ¸ËËºËÈ¶ËÇ·ÈÇ¶ÇÈ¸ÌÈ´ÉÈ³ÊÈ¶ËÉ»ËÇ·ÉÈ³ÆÅ·ÈÇ¶ÉÈ¶ÊÈ¸ÉÃ·ÉÆ¶ÊÅ·ÈÆ·ËÈ¹ÈÅ·ÆÆµÌÆ³ÆÆ¶ÆÉ·ÇÅ´ÇÆ¶ÇÇ¶ÇÈ²ÇÃµÆÅµÅÈ³ÈÅ³ÈÆ³ÈÃ³ÇÃ´ÇÄ¶ÄÅ·ÆÂ´ÇÃ´ÇÆ±ÈÂ±ÅÅ³ÅÃ³ÈÁ²Ç¾´ÅÇ°ÅÃµÇÀ³ÄÃ³ÃÁ´ÅÃ²ÃÅ³ÆÃ¯ÄÁ²ÃÁ°ÄÃ±Â¾°ÁÀ³ÃÂ±ÄÂ±Ä¿®ÄÃ±ÄÃ´ÃÂ´ÆÀ±ÁÂ¯ÆÂ³ÃÀ±ÈÁ±ÃÁ°ÂÂ±ÄÀ³Æ¾±ÃÂ¯ÅÁ±Æ½°ÀÂ®ÃÁ­Ä¾¯Á¿¯Â¾±Á¾°¿Ã±ÁÀ®Å¾°Á¾¬¿¼³Á¾¬¿¼®À¿¬À»¬¼»°¾¼­Á»¬¿»°Â»®Á»¬¾¼¬¿¾¯¿½®Áº®À½¬¾¿«Á¹«»»¬¾¼¬¾¼®¼¿­º¼¨¿¼¬»»¬½¹¬¼»¬»²§µ¸¦¹¶¤º¸©»º¨½¸¦¾º§¸·¥»·«»¸¦»·©»½§»·©º¸ª¹·¥½¹©¸¹©»¸¥¹¹¥½º¨½¶£º¹¨»¸¨»½¨¾¹ª¾¸©»º¨»»¨»º¬½·ª½¸§À»§¼»©¾·©½º«»»ªÀ¼«½·¨½º¨¾º«À»©½¼«Á»©Á¸«¾¼¬À¼ªÀ¹¬À»®½Á¬¾»¬Á»«¿½«¾»¬À»¯Á¾ª¾¾«Á¿®Ã¾¬¾¼®Â½¬¾¾°À½­Á¾¬À¾°ÃÀ­Á¾­Á¾¯Á½®Å¾¯ÂÀ®¿½¬Ä¾ªÄ¾°ÃÃ®ÄÃ°ÃÁ¯ÃÃ³ÆÀ­Ä¾°ÃÁ­Ä¾­Ä¾°ÁÀ°ÄÂ®Æ¿®Ã¾®Ä¾®ÃÀ°ÆÂ²ÅÃ°ÃÀ³ÃÀ°ÇÃ°ÄÀ±ÃÁ­ÆÃ³ÅÀ²ÆÁ³ÆÁ°ÇÃ«ÆÅ²ÇÁ²ÆÃ±ÃÂ³ÆÃ±ÆÂ­ÇÄ°ÂÃ±ÇÄ³ÇÁ°ÄÃµÈÆ²ÈÃ±ÄÄ³ÇÄ®ÈÅ²ÈÅ³ÈÇ±ÆÃ¶ÈÆ²ÆÆ²ÊÃ´ÆÈ³ÆÆ°ÊÂ³ÉÅ´ÆÅµÊÆ³ÊÅµÈÄ³ÊÅ±ÈÆ·ÇÆ·ÆÆ³ËÅµÈÇ·ÊÂ±ÇÃµÇÅ´ËÆ³ÈÆ´ÊÃ·ËÇ®ÇÄ²ÈÈµÇÈ´ÉÆ¶ËÃ´ÈÇµÉÅ¶ÊÆµÉÊ²ÎÊ·ÊÆ·ÉÈ·ÊÈµÈÉ·ËÆ±ËÈ·ÊÇ¶ÊÈ·ÉÈ·ÊÆ·ÈÊ¹ÌÉµÍÈµÈÆ¸ÌÊ¶ÌÊ·ËÆ¶ÈÆ³ÌÇµÊÈ´ÌÆ¹ÊÈ¶ÌÆ¸ÌÊ¸ÏÉ³ÊÈ¶ÌÊ·ÌÉ·ÌÉ¸ËÉ³ÌÇ¶ÌÉ·ËÊ»ÌÉ·ÐÊ»ÎË·ÎÌ¸ÌÈºÊÈ¸ÎÌ·ÏÌ·ÎÊ·ÌÊ¸ÏÉ¸ÏÊ·ÌÉ¶ÊË¸ÏÌºÏËµÐÊ·ËË¼ÎÍ·ÐÌºÎÊ¶ÎÎ¸ÍÉ¸ÎÍ¹ÌÊºÎÎ¸ÎÉ»ÎÎºÎÎºÎÍ¼ÎÍ»ÏË¸ÏÊ¸ÍÎ»ÑÍºÐÎ»ÏÍºÎÏ»ÏÍºÐÎ¸ÎÌ¹ÐÎ·ÐÎ»ÎÊ»ÑÍºÏÎ¿ÌÎ½ÓÎ¼ÑÎ½ÍÏ¾ÐÎ»ÑÎ·ÏÌ»ÓÍ»ÑÐ½ÏÏ½ÑÎ¼ÍÆ±Á«´rq[nYzfQwkQqn]unY{iSunYzr[xt_{wd{flnw¤|¡~ª´©Ê²Ü¬»ð¼ÈúÇÒúÒÛúÓáúØäúÛåúÝêúÝéúÛëúàíúÝíúàîúàîúàðúàïúàñúâðúçïúãóúãóúäòúäôúâôúäóúæõúâ÷úæ÷úé÷úê÷úéöúèùúêúúëùúîúúíúúïúúðúúïúúðúúïúúðúúðúúöúúòúúòúúõúúõúúôúúøúúúúúúúúúúúúúúúúúúúúúúúúúúúúúúúúúúúúúúúúúúúúúúúúúúúúúúúúúúúúúúúúúúúúúúúúúúúúúúúúúúúúúúúúúúúúúúúúúúùúúóúúõúúòúúñúúñúúðúúíúúðúúïúúêúúìúúìúúçúúêùúêúúêúúêùúçùúåúúæ÷úäöúå÷úâöúãõúßòúßóúáîúÝðúÝîúÞíúÝìúÛìúÙêúÓéúÓãúÕãúÏâúÉÝúÈÝúÅÖúÀÓú¾Òú¾Ò÷ºÌô»Êò¼Æõ·Éî¸Ãê³Ãç³Áç²Àâ°»ß¯ºâ®ºÜ­¹Ù«·Ø«¸Ö©´Ò¤²Ì¬Â¨­ uruqnb{`t[{tYzk[ugUqdQtbSndUk`Qi]Oi_Uk`OldYtn]{·¢¬È³½ÊºÈÑ¼ÉÏÀÎÎ»ÎÎÀÐÑ¼ÎÐ¾ÐÐÀÏÎ¼ÐÓÀÎÌ¾ÎÐºÒÌ»ÎÌ»ÐÐ¾ÎÐ»ÎÏ½ÎÏ»ÓÍ»ÏÎ¹ÌÏ½ÐÍ¾ÏÐ¼ÍË½ÍÌ¹ÍÊ¾ËÌ»ÎÎ½ÏÎ»ÏÎ½ÎÎ¹ÍÉ»ÌÉºÎÎ»ÏÌºÌÌ¼ÏÍ»ÌÌ½ÌÊ»ÌÌ»ÎÍºÎÏ»ÍË¹ËÌ¹ÎÊ¹ÌÎºÑÍ¸ÌÊ»ÍÊ¼ÌÊ¸ÊÊ¹ÊÌ·ÌÉ»ÈÊ¹ÊÊ»ÊËµÌÈ¸ÈÊ·ÊÉ·ÌÊ¸ÈÉ·ÆÈ·ËÆ¸ËÆ¸ÊÈ¶ÊÇ¹ÈÈµÈÉµÊÆ¸ÈÇ·ÉÇ·ÊÈ´ÇÆ·ÈÅ¶ÆÈ³ÉÆ´ÆÆ·ÈÉ·ÈÄ¶ÈÆ²ÆÆµÈÆµÆÅ¸ÈÇ¶ÆÅµÈÈ³ÉÃµÇÃ²ÅÄ³ÇÆ³ÈÄ´ÇÄ·ÆÄ³ÇÅ³ÆÄ¶ÇÆµÄÁ±ÈÆµÄÃ³ÄÅ´ÄÀ³ÁÄ°ÇÅ³ÃÂ³ÇÃ³ÃÃ´ÃÀ±ÈÃµÉÃ±ÄÃ³ÃÀµÆÁ°ÃÁ³ÃÁ²ÄÅ³ÃÂ³ÃÁ°ÁÃ®Å¿±ÂÁ®Ã½²Ã¿°ÃÀ°¾¾¯ÁÀ°ÂÁ²Ã¿°¿À¯Ä½³¾Á±ÃÁ¯Ã¾²Ã»³ÃÃ¯ÁÁ©Á¾°Â¾¬Á½²ÁÀ²ÀÁ°ÃÀ®¿»®ÁÀ¯Â¿¯Ã¾¯Á»­Á¾®À¾°À¾­Á¾®À·®¾»¬¾»®¾¾«¿¿®¿¾¬Áº­¾Á¬½¾­¿À¯Áº¯½½®À½¨À½°Á»¯¿¾±¾¹¯¿¾­À¸¬¾½¬Á»¬À¸ª¿¹ª½¾¬¿ºª»·«½·«½º«»¶¬½»«¿¸¬¼·§¹»ªº·§¼¹ªº»©··¨½·¨º¸¨··ª½¸¨½¶§»·§»·¦»·ªº·§»·§¹µ§··¥»µ¥·µ¨·¶¥»¶¨¹³£¹³¦º·¨»³¬µ¼ªÂ½¬¾¸¬¼»§À¼¬Á»¬¿¿¬¿¼¨¾¼­¾¾«Á¿¬¾º­¾À¬¿½¬Â¾¬¾»¯ÁÁ«Á¿­Á¾®Â¼ªÀ¾¬Á½¯Ã¿¬Â¿­ÁÁ¯ÁÁ­Ã¾±¾½°Â¾®ÁÃ­Á¼¯Á¾¬ÁÁ®Ã¿®Á½ª½Á«Á¿®ÀÁ±ÄÁ¬ÁÀ¬ÂÁ®ÂÃ±Ã¿®ÁÁ¯ÆÁ®ÁÁµÂ¼³ÁÂ­ÄÅ±ÃÁ°ÅÅ°ÅÂ±ÃÁ³ÆÃ­Á¾²ÆÂ³ÇÃ¯ÆÂ°ÆÅ³ÂÃ³ÃÃ³ÃÂ°ÈÂ³ÃÆ¯ÈÃ°ÇÂ³ÅÃ´ÈÂ²ÆÅ³ÅÃ¯ÈÆ°ÇÅ´ÈÅ³ÆÄ³ÆÆ³ÊÄ³ÆÅµÈÃ´ÇÇ³ÉÁ´ÇÃ±ÈÈ·ÊÃ³ÈÆ¶ÈÈ³ÈÆ°ÆÆ±ÈÆ·ÆÆ³ÍÆµÊÅµÇÈ²ÊÇ¶ÊÇ´ÉÆ·ÉÆµÊÆ¶ÊÇ¶ÊÈ³ÈÃ´ËÇ¶ÊÈ³ÊÇ¸ÇÈµÆÈ³ÊÇºÌÈ·ÊÈµÊÈ¶ÉÈ·ÌÅ´ÊÅ¹ÈÉ¶ËÉ¸ÌÈ³ÊÆ¶ÊÊ¹ÉÈ¶ÍÌ¶ÊÊ¶ÍÉ¶ÊÌ·ÌÈµÌÊ¸ÊËºÌÇ¹ÌÈ·ÊË¹ÌÊ¹ÊÈ¸ÌÇ·ÊÌ¸ÍÊ¶ÎÈ»ÌÊ¹ÈÊ·ËÇ¹ËÉ»ÎÉ¹ÍË·ÌÊ¸ÐÍ¹ÐÊµÊÇ¸ÎÊ¶ÍÊ¹ÍÉ»ÌÌ»ÎÉ¾ÌÍ»ÐÌ»ÐÍ·ËÍºÌÍ¹ÐÍ»ÎÌ½ÍË¶ÍÊ¸ÏË·ÎÎºÎÌ½ÐË»ÒÎ¹ÑÌ¸ÌÍºÍË¹ÐÎºÍË»ÌÎºÌÊ¹ÌÊ·ÍÌ¼ÍÎ¹ÑÎ¹ÐÊ·ÎÍ»ÎÌ·ÏÎ¼ÐÌ¼ÏÐºÏÐ¼ÒÐ»ÒË·ÑÊ»ÎÌ¹ÏÌ»ÒÐ»ÐÌ»ÒÐ¼ÑÍ¾ÏÎ¼ÐÐ»ÒÐ¿ÏÐ»ÏÑ½ÐÐ»ÐÍ»ÐÐ¼ÒÎ»ÒÍ¾ÐÓ¼ÓÐ¹ÒÌ¾ÒÒ¼ÒÒ¾ÕÏ½ÑÒ¾ÑÌºÒÎ¾ÐÑ½ÕÑ½ÏÏÀÐÐÀÕÓ¿ÒÐ½ÐÒ¿ÓÒÀÑÌ¾ÑÒ¾ÒÑ½ÖÑ¿ÕÓ¿ÖÓ¹ÔÑ½ÓÐÁÕÒÀÕÑºÐÓÀÕÕÀÕÒÁÕÕÁÓÓÁÓÕÀÕÓÁÔÑÁÖÓ¾ÔÒ¿ÒÓÃ×ÔÀÔÖÀÒÔÁÓÕÂÓÌ¹Æ°·z{bq]t]|ubxudzw_ud|{d{zddlrqz¡|¥ ©³¨Â°Ö¨»ì¶ÅöÄÐúÌ×úÔàúØæúØçúáëúáïúâíúàïúãîúáóúãòúâòúäóúâðúçõúç÷úçóúéöúæõúæôúé÷úçøúêøúèøúéøúìúúëúúîúúéúúéúúíúúðúúðúúñúúðúúóúúòúúôúúõúúôúúôúúõúú÷úúöúúöúúúúúöúúúúúúúúúúúúúúúúúúúúúúúúúúúúúúúúúúúúúúúúúúúúúúúúúúúúúúúúúúúúúúúúúúúúúúúúúúúúúúúúúúúúúúúúúúúúúúúúúúúúúúúúúúúúúúøúúôúúôúúòúúóúúôúúòúúïúúðúúïúúïúúîúúíúúîúúìöúëúúëúúéúúëúúéùúè÷úåõúßõúåóúàòúàóúãñúäñúáòúàïúÞîúÚïúÖìúÖèúÕèúÑâúÎáúÈÛúÅØúÆÖúÂÕú½Ñú¿Î÷½Îö¼ÈóºÇì»Æï¹Æë´Ãç³Äç®Âå´¾á°½à¬»Ý¬»Ü¬¸Ù¬·Ø©¶Ò£±¿ª¦wwutl~f|bz`q_~o[wl[unUwi[rgWoiUq`WrdWuk`xwg|¹¨¬Ð»¿Î¾ÍÓ¾ÌÔÀÏÖÂÕÖÃÔÓ¿ÒÐÁÐÕÁÔÕÂ×Ò½ÓÒÁÔÔ¾ÖÑÁÒÒÁÒÒÁÒÓÀÒ×ÃÕÓÀÕÔ¾ÔÕÀÑÐÀÒÑÃÒÔÄÓÒ½ÔÕÁÕÓ¾ÏÒÁÓÓ¾ÏÒÂÒÑÁÒÒ¾ÒÒ¿ÒÕÀÓÓ¾ÓÎ»ÒÐÁÒÒÁÖÎ»ÐÑÁÐÐ¾ÑÏ»ÓÐ¾ÎÐ»ÒÎ½ÐÐ¾ÑÓ¹ÒÎ½ÏÒ¾ÐÒ¾ÌÑ¼ÐÎ¿ÎÎ¿ÏÐ¹ÎÎ¼ÌÌ¾ÍÎ¾ÐÐ¾ÎÍ¼ÌË½ÐÎ¾ÑÑ¼ÎÌºÏÌ»ÐÎ»ÎÌ»ÌÉ¹ÌÊ»ÌÐ¹ÎÎ½ÎÌºÊË»ÎÍ¹ËÊºÎÉ¹ÎË·ÍÊºÉÏ¹ÌÉ·ËÊ¹ËË·ÊÊ·ÍÉ·ÈÈ»ÍÌ¹ÌÌ»ÌÌºÌÎµÊÈ¹ÊÊºÊÈ¸ÈÊ¶ÊÈºËÊµÊÊ¸ÌÈ¸ÉÊ·ËÈ¸ÇÆ¹ÊÊ·ÌÊ¶ÈÅµÊÊ¹ÈÈ³ÈÈ¶ÉÈ¹ÊÇµÈÈ·ÉÇµÆÉµÈÅ¶ÆÆµÈÆ¶ÉÅ·ÈÅµÉÈ¶ÇÇ·ÊÈ¶ÆÈµÉÄ³ÆÈµÆÆ´ÆÃ²ÆÅ³ÆÃ³ÇÄ²ÈÃ·ÈÅ´ÆÇ³ÈÄ´ÅÃ´ÆÁ±ÃÄ·ÄÅ³ÆÇ³È¾³ÅÂ´ÆÃ±ÆÁ¶ÂÄ±ÆÃ±ÆÃ²Å¿¶ÅÃ°ÄÂ³ÂÃ³ÆÁ³ÅÃ¯ÁÃ³ÃÄ³ÃÃ³ÃÀ³¾Á±Ä¿³ÃÅ°ÅÃ³ÆÇ³ÄÄ´ÄÃ³ÅÂ´ÃÁ³ÆÃ±ÃÂ±ÅÁ³ÁÃ³ÂÅ´ÇÁ±Â¾²ÅÃ³Ã½±ÀÁ°ÂÀ­¿½ªÁ½±¿Â¬Ã¿¬Á¿°¿À¯Ã¾®À¾°¾¾¯¿¿°À»®½¾®¾¿¬¿¾¬¾»¯¿Á­¿À¬¾¼­À»®Á¼¬½»¬¿¾¬Á»¬¾»¬¿¼ª¾¼©¼º¬½¼¨½¼«»¼¬»»©¾»§½»ªº¼ª»¼¬½±¨³·§¸º£»½ªº·§º»¦»¹«·º©¹º§»¶©½·¤¼·©»¹¦»¸§»¸¨»¸¥¾¸«»»«¿»©º·¦¾·©¿º§¾·§»¾ª¾»¨¿¸¦¼º¨»½«¾·§¾·¦¾·©¾¼«½»ª¿º¨½¸§¾»¬¾¸¬»»¨»¹«¿»¬¾º«¼º¨¿»¬¿»«¿»«¿½¬¼¹¨½º©¾¾®Ä¾«Áº¬À¾¬Æ½¬À¾©¿¿®Á¿°Â½©À¾®½Á«¿½¬¿»®Á¿«Ä¼«ÂÁ°¾À¬Â»®ÁÂ­ÁÃ±Á»±ÀÁ°Â¾­ÁÁ¯Ä¿¬ÃÀ°Å¿¬ÃÁ®ÃÁ´ÄÀ©ÁÁ°ÄÃ²ÄÁ±ÇÀ±Æ¿²ÃÃ®ÄÃ­ÆÀ²ÆÃ°ÄÁ¬ÄÃ°ÅÂ°ÄÃ±ÃÃ¯ÃÅ³ÃÁ®ÄÁ­ÄÃ°ÆÄ°ÅÀ¯ÄÀ±ÉÅ²ÇÀ²ÆÄ°ÆÃ³ÆÄ³ÅÁ°ÃÄ­ÇÃ²ÅÁ·ÈÄ²ÊÄ²ÅÄ²ÆÆ³ÈÆ¶ÊÆ²ÆÀ¯ÇÃµÈÄ±ÇÁ³ÆÆ²ÊÆ°ÈÆ¶ÆÄ¯ÈÄ´ÆÅ³ÉÆ³ÇÁ²ÈÄ²ÇÃ´ÈÃ®ÈÃ¶ÉÆ´ÊÂ´ÆÇµÉÆ´ÊÇ³ÈÈ´ÉÃ³ÊÆ·ÇÃ³ÇÈ³ÇÆ³ÊÈ´ÈÁµÊÆµÊÅ²ÊÅ³ÊÆ³ÈÅ´ÈÇ³ËÈ³ÈÆ´ËÌ¸ÍÈ·ÌÊ´ÊÇµÊÇ·ËÆµÊÅ·ËÆµÊÈ¸ÇÊ¹ÊÈ´ÍÆ³ÊÇ¶ÈÊ·ËÉ´ÊÇ·ÌÈ¶ÍÊ¸ÊË·ÊÆµÌÇµÊÉ·ÊÉ¶ËÈ¶ÊÊ·ÌÊ·ÉÆ´ÊÉ·ÌÈ¸ÌÍ·ÌÈµÌÈ·ÌÉ·ÌÇ¶ÌÆµÌÊ¸ÌÈ·ÎÍ·ËÌ¸ÍÊ·ÍÉ·ÌË¹ÎÉ·ÌË¹ÌÌ¶ÌË·ËÊ»ÌÊ·ÎÍ·ÌÊ¹ÐË»ÌÉ·ÐÊ¼ÍÈµÍÌºÏÈ·ÍÌ¶ÏÌ»ÏÊ¶ËÌ¸ÎÑ»ÐÌ¼ÎË»ÎÎ»ÓÎ¼ÏÎ¼ÒË¼ÏÎ»ÐÐºÒÎ»ÐÎ»ÎÊ¹ÎÏ»ÌÍ¼ÌÌ½ÌË¾ËÍ¸ÌÐ»ÐÍ·ÑÍ·ÎÏ½ÒÐºÓÎ¼ÒÐ»ÐÎ¾ÑÐ¿ÐÐ»ÓÒ½ÒÏ½ÏÐ½ÎÑ¾ÏÍ»ÎÈ³Ä©°qq[lWziQwoUtiWxo[wrWxoYwt]wxffnqu{£|¥µ¤Å°Üª¹ã³ÇöÁÐúÊÖúÏÜúÔáúÓäúÙæúÜçúÚéúÜíúàíúÞíúßîúáîúàïúáñúâïúäñúâòúâïúáòúáòúçóúçöúâôúäõúæöúæ÷úê÷úèùúæùúçöúèúúìúúíúúîúúïúúóúúôúúóúúñúúðúúòúúîúúòúúôúúöúú÷úúùúúùúúúúúøúúúúúúúúúúúúúúúúúúúúúúúúúúúúúúúúúúúúúúúúúúúúúúúúúúúúúúúúúúúúúúúúúúúúúúúúúúúúúúúúúúúúúúúúúúúúúúúùúúúúú÷úúòúúðúúóúúïúúïúúïúúìúúïúúîúúîúúëúúëùúíúúè÷úéùúæøúçõúåöúäöúäóúäôúâñúàóúàðúÞñúÛïúßïúÜìúÝïúØìú×çúÒæúÒâúÒáúÌßúÈÙúÇÚúÃÖúÁÕúÁÓù»Ïö¹Êõ¼Èõ¸Êò¶Ãì´Áè³Âè²Ãä³¿â°¾á²½Û«»Ú®·Ù©·×ªµ×®·Ù©ºÓ¤°Çª³ wknrlz`u_|r`ziWwrWrgWngSr]Qn_Qg]Ql_Sl_Mi_QngUwq¹¬·Æ·ÂÎºÌÐ½ÏÎ¼ÎÌºÏÏ¾ÑÒ»ÌÐ½ÏÍ¼ÏÌºÑÌ½ÎÑ¼ÒÏ¼ÐÌ½ÏÎ½ÏÎ»ÒÎ¾ÐÎºÐÐºÏÏ½ÏÎ½ÎÎ»ÐÍ¾ÎÎ¹ÎÌ»ÐÏ¹ÌÌ»ÏÎ»ÎÎºÎÎ»ÑËºÏÎ»ÌÈºÏÎºÍË»ÎÍ»ÐÎ¹ÎÎ½ÍÌ·ÌÌ»ÌÎ¹ÊË»ÎË½ÏÌ¹ÌË»ËÊ»ÌÌ¹ÊÈ¹ÌË¹ËÌ»ÌÌ¸ÊË¼ÌÌ·ÎÊ·ÊÇ·ÊÉ»ÌÈºËÈ»ÎË¹ÌÊ·ÈÈºËË·ÌÊ¶ÊÈµÌÈµÈÊ¶ÊÇ¸ËÊ¸ÉÈ¶ÇÆ¸ÌÉ¸ÊÈµÊÇµÈÆ·ÌÈµÌÆ·ÈÇ¸ÆÇ¶ÇÈµÆÆ³ÄÈ¸ÇÆµÊÆµÈÆ¶ÉÃ³ÈÆ²ÈÇµÈÆ³ÇÃ·ÇÈ·ÆÅµÈÄµÈÅ¶ÆÆ´ÈÅ´ÅÁ³ÈÆ²ÄÆ´ÆÄ±ÅÄ³ÈÁµÆÃ´ÆÃ³ÆÁ²ÆÃµÅÁ´ÅÃ²ÆÃ²ÄÃ²ÇÄ´ÃÁµÃÄ¯ÄÃ²ÄÁ³ÃÃ´ÃÃ°ÃÁ®ÄÃ®ÄÁ°ÄÁ³ÁÁ³ÂÁ®ÂÁ²Á½°ÄÁ«ÄÁ¬ÃÁ³Á¿°ÄÀ®ÁÂ®Ä¾³ÃÀ®ÂÁ®ÁÁ®Â¿®Â½¬Á¾°ÄÁ¬Ä½²À¾®Ã½°ÂÀ­¿¾¯Ã¿®Á½­¾Á±ÃÁ¯¿¾­À»¬ÁÀ°¾»ªÁ¶­¾¾¬¾¿¬Ã¼¯ÁÁ°Â¼«¿À®Á¿®¿¼®À¾®ÁÀ­Á¿¬½»­¿¼®¿Á¬À¾«¿¼¬¾¼§¿½«¾»®»»¬¿¹©¼º­¼»¬»»©¼·¬¹º¬»·«¼ºª»¹«½»ª¼·©·¸¬»»©»¸«½»¨»¹¨¾·©¹ºª»º¬¼·¥¹·«¹¸ª½¸¥»¶ª¸´¨¾¹¥·³©¸¸¨¸³¨º·¨»³§»µª»µ§»·©»³­¹À¨½½«½»­¼½©¾½­¿½­¾»¬¾¿«Á»«¾½¯À¼¬¾À­¿¼®Á¼°Á¼©À¿¬¾Á­Á¾¬Â»®À½­Â¿«Á½¬¿Á®Â¾©Ã¿­Ä¿¯Á¾®Á¾©Á¾¬ÂÁ­Ä¿¬Á¼¬ÀÀªÁ½®À»®ÂÁ°Ä¿¯Â¾³Ã¿¯Æ½¬Á¿¬ÃÁ¯Ã¿¬ÁÁ°Á¾²ÂÃ±Å¿°ÃÁ¬ÅÅ®ÅÂ±ÁÁ¯ÈÁ¯Æ¿±ÅÂµÆÁ³ÅÁ°ÃÁ²ÄÃ¯ÄÃ´ÅÁ³ÃÂ²ÄÃ³ÃÂ³ÃÃ³ÆÂ¶ÁÆ³ÈÆ³ÇÃ·ÆÆ´ÈÄ·ÉÇ³ÃÅ´ÆÈ³ÈÅµÈÄ³ÇÆ³ÈÇµÈÆ²ÅÆ¶ÆÃ´ÇÅ¶ÊÇµÊÊ´ÈÇ´ÈÆµÆÆ¶ÈÅ¯ÆÇ¹ËÆ·ÊÇ³ÊÄ´ÇÆµËÆ³ÉÆ´ÊÅµÈÆ³ÊÇ¶ÆÆ¸ÉÆ´ÈÅ³ÉÇ³ÈÈ¹ÊÆ³ÈÈ´ÈÈ¶ÎÈ·ÊÆ¹ÌÆµÊÉ·ÊÈ¹ËÇµÌÆ¹ÈÊ·ÍÈ´ÌÌ¶ËÈ¶ÌÈ·ÊÌ·ÊÇ»ÌÊ¸ÌÈ´ÎÉ¹ÊÈ¶ÌÊ¶ÊÈ³ÊÈ¶ÊË³ËÈ¶ÈÉ·ÎÊ»ÎÉ»ÉÊ¼ËË¶ÐÈ¹ËÊºÐËºÌÊ¹ÌÊ¹ÍÉ¹ÍÉ·ÊÊºËËºÎÊ»ÎÈ¸ÌÉ»ÏÏµÌÈ¹ÌÇ»ÐÍ»ÏË»ÌË»ÍÊ»ÏÌ·ÌÊ»ÎÌ¶ÐÍºÏÉ·ÒÌ¹ÑÌ·ÌË·ÎÍ»ÎË»ÐË¹ÎÊ¼ÍÎºÏÍ¹ÎÌºÐÌ·ÑÍ¾ÎÐ¸ÐÍ»ÎÊ¹ÌÌ¾ÒÈºÎÍ·ÎÏºÎÎ·ÏÌ»ÒÎºÎÐ»ÓÒ¼ÎÍ»ÏÎ¸ÑÍ¼ÑÏ¼ÔÐ¾ÒÌ»ÐÎ¾ÐÐ¼ÕÑ»ÒÐ»ÐÏ¼ÒÍºÐÐ½ÐÏ»ÐÏ¾ÑÏÀÐÒ¾ÓÐ¹ÓË¼ÐÑ¾ÓÒ¾ÓÐ¿ÐÐ½ÒÍ»ÒÐ»ÐÏ¾ÐÑ¼ÓÏ½ÏÑÀÒÒ¾ÓÐ¿ÓÓ¿ÓÐÂÓÒ»ÒÐ¾ÑÑ¿ÕÓ¾ÕÒ¾ÐÍ½ÕÒ¾ÐÒ½ÒÒ»ÒÓ¼ÓÒ½ÒÒ¼ÖÒ¾ÒÓ¼ÓÒ¿ÔÒÁÒÓ½ÓÒÀÓÕÁ×ÖÁÒÒÁÕÑ¼ØÖÁ×ØÁÓÖÁÖØÁÒÔÁÒÔÁÑÈ´Ã¬³rwgtdu`{o_~u_zzf{dxf|dkow|~ ¬¢®¥Ã«Ð¢¸á´Áë¹ÆúÆÔúÐÛúÖàúØçúÙæúÜêúáíúàíúàîúãñúãòúãïúæñúæóúçóúêõúçóúãðúäóúäôúæöúéöúë÷úéúúçùúèúúêúúíùúë÷úëúúìúúðúúñúúòúúôúúñúúôúúöúúôúúõúúõúúõúúöúú÷úúøúúùúúúúúúúúúúúúúúúúúúúúúúúúúúúúúúúúúúúúúúúúúúúúúúúúúúúúúúúúúúúúúúúúúúúúúúúúúúúúúúúúúúúúúúúúúúúúúúúúúúúúúúúúúúúúúúúúúúúúúúúùúúøúúöúúñúúñúúñúúïúúòúúñúúòúúðúúîúúíúúëúúëùúçùúèøúëúúèùúéõúèöúãöúäõúåóúãóúâôúâóúâïúâïúßïúáïúÖëúÔéúÓèúÐâúÌáúÎÞúÊÝúÈÚúÆØúÁÒú¿Î÷ÁÌö¾Î÷¹Êñ¹Éï¸Æì¶ÅêµÃèµÃæ²Àâ´Áà®¼á¯¼ß­¸ß¯»Û¯¸Ö¬·Ñ¨³¿¬±{urungbt`x`wo`|kWwf_ui[nd[qdUugQli[tn[xwlµ¢®Ç¶ÃÐ½ÌÕÂÐÓÃÑÕ¾ÒÕÁÒÐ½ÓÕÃÕÓÃÕÐÁÒÐÁÒÔ¿ÓÕ¿ÔÕ¿ÓÑ¿ÐÕÁÕÓÃÑÒÂÑÔÁÓÒ¾ÐÔ¾ÎÑ¾ÒÒ¼ÒÔ¾ÓÖ»ÓÒÁÒÐÀÒÓÁÕÕ¾ÓÑÀÒÑ¾ÒÒÀÕÒÁÕÑÁÒÐ½ÐÓ¾ÖÐ¿ÐÒ¾ÒÒ½ÒÐ¿ÐÓ¿ÒÐ¼ÐÐÀÑÐÀÐÐÀÒÏÁÐÎ¾ÐÑ¾ÒÓ»ÏÒ¿ÎÐ½ÑÎ¾ÒÓ¿ÐÎ»ÐË¼ÐÏ¾ÐÏ½ÎÊ½ÎÌ¹ÎÍ¹ËÏ¼ËÌºÐÌ¹ÌÎ¼ÎÍºÍÉ¹ÌÌ½ÈÍ¾ÍÍ½ÊË¾ÍÊ¾ÌÌ·ÍÌ¼ÌÌ»ÊÍ»ÎË»ÎÊ»ÌË»ÌÌ¹ËÉ»ÍÊ»ÌÈ¸ÊÊ»ÌÊ¹ÊË¹ËÊ·ËÈ¹ÊË¹ÊÉ¹ÌË¹ÊÈ·ÊÈ»ÇÎ¹ËÊ»ÌÊ¸ÉÊºÊÊ´ÊÅ·ÈÇ¸ÉÈ·ÉÈ·ÊÅ·ÈÈµÌÆ¶ÉÊ¸ÉÆ¹ÈÆ·ÈÆ¶ÊÉ¹ÈÅµÇÆ·ÆÇ·ÈÄ·ÈÄ¶ÈÄµÇÈµÇÅ¶ÆÆ¶ÆÆ±ÆÅ·ÈÆ¸ÈÅ¶ÇÆ³ÅÆ´ÈÃ³ÃÂ¶ÃÃ´ÃÈµÇÅ¶ÊÃ´ÈÃ´ÇÃ³ÇÃ³ÅÆ±ÈÄ°ÆÃµÃÆµÆÁ³ÇÁ´ÃÂ³ÅÃµÅÁ±ÂÂ³ÅÅ±ÆÁ²ÃÂ´ÅÃ±ÃÃ±ÄÈ´ÅÁ³ÂÂ±ÃÂµÂÂ´ÃÃ¯ÆÁ´ÂÁ±ÄÃ³ÆÃ³ÃÃ±ÃÂ³ÃÀ³ÃÂ²ÃÁ®ÀÂ³ÁÀ³ÃÂ²ÂÀ³Â¿³ÅÂ­ÃÁ¯Á¾±Á¿¯Á½±Â¾³¿Á¬À¾®Á¿°À¾±Âº®¾À°À¼°À¾°Á¿¬¾¼¯¾À¬Ã½®¾½¬¾½¬À¿¯Áº°¿¿­Á»­À½±¿¾­¿½¬½¾±½½¬Á¾ª»¹¬¼¼­½»«½¼­¿¼ª¾»¯½»«¾»¬¼®¤¶µ¨º¸§º¸§¼¸¨»º£¹·§»·¦¹·ª»·¤»·©¾¸¦¹¸¨»¸§½µ¤º¸¥»¹ª»¸¦»»©»·©»»©¾»ª»º©»¹ª½»ª¿º§¾¸©¹»¨¿·©»¸«½¼«À½§»º©¾»ª¾¸¦»·¥½»©¿»¨¾»®¾»®¾»ªÀ¼©¾·¬¾½¬¿½©Á·ª¿½¬¾»§¿¾¬¿½®Á¾¬À¾¯Á½°Á»«½»©ÁÁ®¾¿«¿»¬Á½°Â¾¬À¾­Á¼©¿À­Á½®ÁÁ¬ÁÁ±ÂÁ±ÄÃ±Ã¾¬À¾°Á¾¬ÄÁ­ÃÁ®Æ¾®Æ¾¬ÃÃ¯ÄÀ°ÁÁ¯Æ¾ªÃÁ°Å½³ÄÄ­ÃÀ²ÅÁ±ÆÁ²ÃÁ±ÄÁ²ÅÅ­ÃÁ¯ÆÃ±ÆÁ¯ÅÁ²ÄÃ²ÆÄ±Ä¿¯ÄÁ³ÃÄ²ÇÂ²ÃÃ²ÇÃ²ÆÆ¯ÄÀ±ÇÃ²ÅÄ³ÆÁ°ÆÃ´ÇÂ°ÄÅ²ÄÃ³ÆÅ²ÈÁ¯ÇÄ´ÈÃ²ÃÄ´ÇÆ¸ÈÈ´ÊÈ®ÇÆ³ÇÂ¯ÊÆ´ÈÄ´ÊÆ²ÈÃ²ÈÆ³ÈÁ³ÊÁµÉÂ³ÈÆ³ÉÇ²ÊÃµÆÆ³ÆÅ±ÉÃ·ÊÆµÈÄ¹ÊÅ·ÇÅ´ÊÆ°ÈÇ²ÊÆµËÈ³ÊÆ³ÈÁ³ÈÊµÎÆ³ÆÅ´ÉÆµÌÉ¶ÊÆ³ÉÈµÊÇ³ËÈ´ÌÇµËÈ²ÊÈµÈÇµÌÅ·ËÆ²ÉÊ¶ÉÆµÌÊ¶ËÈ´ÍÉ·ÊÈµËÈ·ÊÈ´ÊÊ¶ÌÉ¸ÌÉ·ÊÈ¸ÌÇ·ÉÈ·ÊÈµÌÆ¸ÊÈµÌÉ³ÌÉ¸ÊÈ·ËÉµÊÊ¸ÊÉ´ÎÈ¸ÌÊ·ÌÊ¸ÌÊ¹ÏÈ·ÌË·ÎÊ·ÌÈ¸ÏÌºËÉ·ÌÍ»ÎÉ¸ÎÈ¹ÎË¹ÏÊ»ÌÈ·ÌËºÏÊ¹ÍÌ»ÎÍ¸ÌÈºÎÌºÎÊºÏÈ¹ÌÌ·ÏÌ¶ÌË·ÌË¸ÑÌ·ÍÌ¹ÌÌ·ÎÎºÎÌ¹ÏÌ½ÐÌ¸ÏÐ»ÌÌ¹ÎË¾ÐÌ¸ÏÎ½ÐÌ½ÑÌ»ÎÌ»ÑÌ»ÐÎ¸ÏÎ»ÎÎ»ÓÐ¼ÐÌºÐÎ¹ÏÎ»ÒÏ»ÒÎ»ÒÒ»ÐÏ¾ÏÎ»ÐÓ»ÒÏ»ÎÌÁÑÓ¾ÒÎ½ÍÌ·ÊÁ¬Ãªxgn]iY{iYtlSxnUrt_xrWuuYzufzliowt¢{¦~°¤Á«ÎµÛ®¾ïºÆúÉÓúÎÖúÒÝúÕáúÔãúÙãúØäúÛëúÜëúàïúàíúßðúäïúäóúáïúäïúâòúßðúßïúàñúàòúäóúåóúâöúâöúæõúäöúäõúäöúæøúê÷úíúúíúúîúúìúúïúúðúúñúúñúúîúúðúúñúúóúúöúúùúúøúúúúúúúúúúúúúúúúúúúúúúúúúúúúúúúúúúúúúúúúúúúúúúúúúúúúúúúúúúúúúúúúúúúúúúúúúúúúúúúúúúúúúúúúúúúúúúúúúúúúúúúúúúúúúúúúúøúúøúúöúúôúúòúúóúúñúúìúúíúúîúúóúúñúúìúúìúúéúúäøúæ÷úæ÷úãöúä÷úèóúâöúàôúÞòúáñúàòúàîúÜîúßïúÝìúÛîúÝìú×êú×èúÐäúÍáúÈßúÉÜúÈÛúÈÖúÉØúÆÓúÂÐù½ÎöºÉõ½Ìô»Èï²Áê·Àê·Ãå³Ââ°¾à®½Ý¬»Ü®ºÜ®·Ýª·Ùª¶Ó¨µÒ§²Ï¥²Èª¹¢£{rgikfx_xnWwr[|qYxkQq_Mk_OoWKi`MidUi_QkgWro`|³¬È°»Í¸ÅÎ¼ÎÑºÎÌ¿ÌÎ¸ÒÎ¿ÎÏ»ÎÍ»ÎÏ½ÐÎ¾ÐÎ¼ÐÎ½ÏÎ¾ÏÑ¿ÎÐ»ÑÌ»ÎÌ»ÎÌºÐÏ»ÐÎ½ÌÎ½ÑÐ¼ÑÎ»ÌÒ»ÐÏ½ÎÎ½ÏÐ¹ÐÍ¾ÑÌ¼ÐÌ»ËÎ»ÊÌ»ÐÍ»ÎÌ»ÏÌ»ÊË¼ËÍ»ÎÊºÌÎ¹ÌÊ¹ÍÎºÌÌ¸ÎÎ¹ÍÊ·ÊÊ¸ÍÎ·ÌÌ»ÊÉ¸ÌÈ¼ÎÌ»ÌÉ¸ÊÊ¸ÌÌ»ÌÈºÌÊ·ÊÈ¸ÊË¸ËÊ·ÊÊ·ÏÈ´ÇÈ¸ÊÊ¹ÏÈ´ÈÆ¶ÈÊºÉÆµÈÆ·ÇÊºÊÊ·ÈÈ·ÊÇ¸ÈÆ¹ÉÈ·ÊÈ·ÊÇµÉÆµÈÆ¶ÆÇ¸ÇÆ³ÉÄ¶ÈÇ³ÇÆ·ÇÈ²ÇÇ·ÆÃ¶ÈÆ·ÈÇµÉÇ³ÇÄ±ÈÅ²ÆÃ³ÄÆ³ÅÈ³ÇÃ´ÆÁ±ÄÁ³ÈÅ³ÆÃ³ÇÃ³ÃÆ±ÅÁ³ÄÃ³ÆÆ±ÇÀ²ÆÃ²ÆÂ³ÈÃ²ÆÁ±ÇÃ±ÄÁ²Á¾²ÇÁµÇÃ²ÃÁ°ÃÁ±ÃÁ³Á¾´ÃÂ¯ÃÁ°Æ¾²ÄÂ´Ä¾­ÂÁ±ÄÀ°Ã¾®ÃÁ°Á¿³ÃÀ­ÃÁ°ÁÀ²ÃÀ°Â¿®Â¾²Á½¯Á¼²¿¿¯¿Á­Á¾°Á½¯À¾°Á¿°Á»­Â¾¬ÁÀ¬¿¿®À¾¯Â»­¿¾®Á¾­Áº¬Á¾¬¿¾®¿½«¿À°¾½­¿¾¬¾¾®À¾­À¼­ÃÀ­Á¾®½º®Ã½®¾½¬¿¼­¾½®¾·¬¿»¬¾»«Á»®¾º­¾¼¬¼º°½º¬»µª¾¹ª»¸¬¾º«½»ª½·«¾»«Á¹¨½¸¬¼¹©½¹©¼·«¹º«»·ª½·©»¸¬»¸©»¹«ºº©¾·¨¼´©»¸ªº·¦»µ©»·¦··§»¶§·¶§¸·¨»¶¤¹µ§»¶¨¹»¬¿½¬½¼¬Â¹¬À¹©¾¾­À¼ªÂ¹¬Á¼§Á¾¬Á¼¬Á½­Ã¿­Á½©¾½ªÅ¾¯Á¾®ÂÂ¯ÃÀ©Ä¿¯ÂÁ­Â¿­Á¿®Á¿­Á½¬ÃÀ­Ã¿®Ã¾³Á¼®Æ½¬ÃÁ«ÃÀ®Â¿®Á¿®Â¾²¿Á­Ã¿¯Ã¿¬ÁÁ°Â¿®ÅÀ®ÃÀ²Ä¾²Æ¿¬ÃÀ°ÂÂ°Ä¼³ÆÀ¯ÅÁ³ÆÀ¬ÄÃ¯ÅÁ²ÈÃ³ÅÃ±ÆÄ±Å¿´ÆÅ³ÄÆ´ÇÀ±ÆÁ´ÆÅ³ÇÃ²ÅÃ¯ÆÂ¶ÆÃ³ÈÅ²ÅÂµÆÆ³ÊÆµÊÀ´ÇÆ³ÈÄ¶ÈÆ´ÈÈµÇÆ³ÊÅ³ÊÃ³ÇÂ³ÊÆ²ÈÆ´ÆÆ³ÈÆµÈÃ³ÊÆ±ÇÈ³ÌË¹ÊÈ±ÊÃ¹ÈÇµÈÉ¶ÍÆµËÅ·ÊÇ·ÌÈµÈÅ·ÊÈ¸ÊÈµÉÈ´ÐÈ·ÎÈ³ÊÆ·ËÊ´ÊÆ¸ÌÇµËÊ¹ÍÌ¶ÈÈ·ÉÇ¹ÍÌ¹ÍÈ·ÌÊ¹ËÈ³ÌÈ´ËÊºÌËµËÊ¹ÎÈ´ÌÊ·ÐË¹ÍÇ»ÌÈ»ÎÊ´ÍÌ¹ÌÈ·ÐÈ¸ÌÌ»ÊÈ·ÎÊ·ÎÆ·ÐÈ·ÍÊ·ÐÇ¸ËËºÐÍ·ÑÇ·ÍÈ¶ÏÍ¶ÎÎºÍÌ¹ËË¸ÏËºÌÊ»ÍÌ·ÐÈ¶ÍÊ·ÎÌºÎÌµËÊ½ÎËºÐÎ¹ÏÊ¸ÏÌ»ÐÎºÎÌ»ÎÊ¹ÐÍ¼ÎË·ÏÌ½ÏÌ¸ÎÊ¼ÑÍ¹ÑÍ¹ÐÉºÒÎ¼ÏÊ¹ÑÎºÑÎ¾ÑÐ»ÐÎ¾ÒÌ»ÐÏºÎÌµÏÊ»ÎÌ¹ÒÌ·ÓÌºÍÊ»ÒÎºÑÍ¼ÎÍ»ÐÏ¼ÑÎ¼ÐÌ½ÒÌ½ÒÌ¸ÐÒ¾ÓÐºÒÎ»ÐÑ»ÒÐ½ÕÍ¾ÐÐ½ÓÓ¾ÑÎ½ÑÍ¹ÐÏ»ÓÐ¼ÒÐ½ÒÐ»ÎÐ¿ÓÏ¾ÒÓ¿ÓÍ¾ÕÒ½ÑÍ»ÒÐ½ÕÌ»ÓÎ¹ÓÐ¾ÓÐ¿ÓÐ¿ÕÔ»ÒÓ¾ÖÌ¾ÔÒ¿ÓÎ»ÖÒ¾ÓÐÁÓÒ½ÓÐÁÓÐÀÒÑ½ÓÑ¼ÓÑ½ÔÒ¾ÖÑÀÕÓ¼ÖÑ½ÓÒ¿ÕÕÁÔÐÁÓÑÁÓÔÀÖÖÁÕÒÃÕÓÁÖÖ¾×ÒÁÓÒ¿ÕÕ¾ÖÕÀÒÑÃÐÅ®Á§n{grbq]u_wq]xf|{dwfltxu¦© ³¦½¬Ç³Î§·ã³Æô¾ÏúÊØúÑßúÖãúÛæúÙèú×éúÞëúÛìúáïúâïúãóúãòúäòúäôúèóúêöúæöúçôúáôúæöúéöúè÷úéøúéúúèøúéøúêúúìúúìúúïúúïúúïúúðúúîúúóúúñúúñúúòúúòúúóúúóúúôúúøúúúúúúúúúúúúúúúúúúúúúúúúúúúúúúúúúúúúúúúúúúúúúúúúúúúúúúúúúúúúúúúúúúúúúúúúúúúúúúúúúúúúúúúúúúúúúúúúúúúúúúúúúúúúúúúúúúúúúúúúúúúúúúúúùúúøúúöúúõúúóúúóúúòúúðúúóúúõúúõúúðúúïúúçúúìùúëùúéùúèùúêöúä÷úçõúâôúàöúäôúãòúæôúãóúáðúàñúÝïúÛîú×íúÕèúÓåúÎåúÊáúÌÜúÎÝúËÝúÍÛúÆÖúÆÓúÁÔúÂÐ÷½ÎôºÊðºÈî¸Éë·ÅëºÃè³Âá¯Àß³Áã±Àß²»Ü¯·Ý±»Ö­·Òª²Ð¦µÂ®´¢¡nnlqg~dw_w`~n`~k[wkWtdYqd[ofUul`xo`|wi¾ª³Î¼ÄÒÁÌÒÁÏÖ¾ÓÔÃÓÑ¿ÒÔÁÓÓÁÖÕÀÑÓ¿ÕÒÂÕÕÂÔÕÂÖÓ¿ÑÓÁÒÒÁØÓÀÔÒ¾ÓÐÀÓÕ¿ÓÓÁÔÒ½ÕÒ¿ÓÕ¾ÒÖÁÓÒ¿ÓÓÁÓÓ½ÕÔÁÕÒÁÒÕ½ÑÏ¿ÓÑÁÕÒ¾ÐÕÂÓÑ¾ÐÐÁÏÐ¾ÕÐ¾ÓÔÀÒÓ½ÓÐ¼ÐÎÁÒÏ¿ÒÒ»ÑÐÀÏÎ¾ÑÐ»ÍÐ¾ÐÎ¼ÏÏ½ÑÐ¾ÒÐ¸ÐÒ½ÒÎ¾ÐÑ¼ÎÑ»ÏÒ»ÏÌ½ÐÍ¼ÒÍ¼ÐÍ»ÐÌ½ÐÊ»ÐÎ»ÏÌ¸ÏË»ÏÍ»ÍÌ»ÏÊ¹ÏÌºÍÊ·ÐÊ¼ÌÊ¸ÌÈºÌË·ËÌ»ÌÎºÎÊ¹ÍÊ·ÍÌ»ÎË¶ÌÇ¹ÍÊºÍÎ·ËÊ¸ÍÌ»ÌÊ¹ÎÈ¹ÌÆ¶ÊÉµÍÈ»ËÇ»ËÉ¹ÊÇ·ÉÈ¶ÊÉ»ËÇ³ÌÅ¹ËÉ·ÉË·ËÆ¹ÉÅ·ÊÇ·ÈÆ·ÉÈ¹ÉÈµÆÇ·ÈÅ³ÊÉ³ÉÆ¶ÈÅ·ÊÅ³ÆÆ¶ÇÄ·ÇÆ·ÊÆµÆÆ¶ÈÈµÇÄ·ÈÅ·ÆÅ¶ÈÆ²ÇÅ¸ÈÈ³ÅÃ´ÌÄ³ÈÉ·ÇÅ¶ÈÃ¶ÇÃµÆÅ¯ÆÀ´ÈÆ²ÈÆ³ÆÂ±ÊÁ³ÁÃ±ÅÀ²ÆÆ³È¿°ÈÂ´ÇÀ³ÃÁ±ÆÁ´ÈÂµÃÂ²ÆÃ³Æ¿³ÅÃ±ÆÃ°ÄÁ±ÃÁ±ÃÀ°ÃÀ±ÄÂ³ÆÃ°Æ¾±ÄÁ°ÃÃ±ÇÀ³ÃÃ³Å¾°ÅÀ±ÃÁ³ÅÁ³¾¿µÆ¿³ÃÁ¯ÃÁ²Â¾²ÄÁ­Å½³Æ¾¬Â¿¯Á¾¯ÂÀ³ÅÁ±ÂÁ®Ã¿±Á¾±ÁÁ­Ã»¬Â¿±Å¾´Á¼¯Á»®¿¾³Ã¼¯Ã»­Á¾©¿¼¬¿½¬¾¿«À»¬À¿¯»»¬À¼¬¾·¬À¼¯¾»¬¿º¬¿»«¾¹ª¾¹­½¼«¾³¥µ·¦¹¹£»½§»¹§»·¨»¹£»º§»µ§»»¨»¸§º¸§½·©½¼§½¸©¾¸ª¼»¥»¶¬»º¥¼¹¦¼¸«½º«»º©»»ª½ºªÀº¦Àºª½½ª»½¬¹º¥º¹¨¼»©¾º¦¾»«¾¼©¾½§½¾¬Á»©Á¾­¾»©¾¼«¿º¨»¾§¿º¬¾¼¨¾»«¼º«¿½¬À»©¾¾±À¾«Á¿«¿¾®Á½«À¾ªÁÀ±Á¾®ÂÁ­ÀÁ«À¾«Á»«Á¾­Á½¬Â¿«Ã¾«½Á²Å¿­ÃÁ®ÄÁ®Ä¿¯ÄÀ¬Á¿®ÃÀ¯ÄÁ¬ÂÀ¯ÃÃ«ÃÁ®ÃÁ³ÂÃ°ÂÁ®ÂÂ²ÅÃ°ÄÁ´ÆÃ²ÃÄ¯ÂÁ³ÆÁ¬ÃÅ®ÆÅ²ÆÁ®ÅÃ³ÅÄ¯ÅÃ°ÃÃ²ÃÃ´ÅÄ¯ÄÃµÆÂ¯ÂÀ³ÅÂ³ÇÄ®ÄÂ³ÅÃ±ÆÃ´ÆÁ°ÄÂ³ÆÃ±ÈÆ²ÈÆ³ÅÆ´ÆÁ±ÇÅ±ÈÃ³ÈÃ°ÈÅ³ÇÆ²ÈÄ±ÆÃ´ÆÇ³ÉÇ°ÈÃ³ÆÇ³ÈÄ®ÊÂ²ÇÉµÇÄ¯ÊÆ³ÇÈ³ÊÆ³ÊÅ³ÈÅ³ÊÄ±ÈÅ·ÆÆ¶ÊÆµÈÄ·ÉÃµÉÆ³ÉÄ³ÊÆ³ÇÄ´ÈÈ´ÊÈ³ÌÇ¹ÊÈ±ÉÅ³ÊÇ´ËÊ´ÌÈ³ÊÇ¶ËÊ·ÉÈ¶ÈÇ·ÈÆ¶ÈÈ³ÌÈ·ËÊ¸ÌÇµÈÇ³ËÊ´ÍÊ³ÌÉ·ÌÅ¹ÌÊ¶ÊÊ¸ÌÊ·ÈÊµÌÊ·ÌÉ¹ÌÊ»ÊÈµÊÉ»ÎÊ´ÌÆ·ÉÊ·ÌÊ·ÎÊ·ÌÉ·ÌÉ·ÎÊµÊÈµÏÊ¸ÌÈ·ÍÈ¹ÌÏ¶ÍÌ¹ÍÌºËÉ¸ÎÌ¸ÌÆºÎË¸ÌÌ¸ÎËºÏÈºÎËµÎË¸ÍÊ¸ÏÍ¸ÌË¸ÍÊºÌÍºÎÊ¶ÐÍºÌÎ·ÎÌ¹ÎÌ¹ÎÊ¶ÐÌ¼ÐÎ»ÌË»ÎÌºÐÎ½ÒÎºÌÍ¼ÎÌ»ÏÑ¸ÎÎ»ÐÊºÌÎ·ÐÎ»ÒÐ»ÍÌ»ÑÍ¼ÏÌ»ÏÎ»ÒÏ»ÏÎ¼ÏÏ»ÏÑ¼ÑÎ»ÎÐ¾ÐÏ»ÒÎ¾ÐÎºÏÏºÐÓ½ÓÏ¿ÒÏ»ÌÎ»ÐÐ¼ÏÎ»ÎÎ·ÌÍ¹Æµ¤»£|iq`qY|kUqiQuiYtt[tr[wz`bginu¡¨³¡»©Å¯Ð£¸á°¾ð»ÈúÊÓúÏÙúÑÝúÓáúÓäúÖåúÙåúÛéúÝéúÛìúßêúÝñúâïúâïúãñúâðúßðúÝïúÝñúãñúãóúáöúâóúæöúãöúçöúç÷úèöúçùúèöúìúúëúúìúúïúúðúúðúúïúúïúúïúúîúúñúúòúú÷úúùúúúúúúúúúúúúúúúúúúúúúúúúúúúúúúúúúúúúúúúúúúúúúúúúúúúúúúúúúúúúúúúúúúúúúúúúúúúúúúúúúúúúúúúúúúúúúúúúúúúúúúúúúúúúúúúúúúúúúúúúúúöúúöúúõúúóúúòúúòúúðúúëúúìúúóúúïúúðúúëúúêúúçøúèøúæ÷úç÷úåöúáóúãóúáóúßñúâïúáóúáñúßïúàðúÛðúÙëúÖëúÓçúÕèúÒæúÎâúÌßúÉÞúÈÙúÈÙúÈØúÇÖúÄÒúÄÓúÀÐú¾Ìö¾ÌòµÇï¸Çì»ÄêµÁè±Áã¯ºÞ«»Ù«·Ù©³Ø¦´Û©·Ö¬¸Ò¦µÎ£²Ì£­Æ­½£¬oifg`t`wz]znStbUtbOo]QlfQl`SgYQn_UkgQrg]|t®¦Áµ¹Î»ÆÌ¾ÊÎ½ÎÎ½ÐÎ½ÌÑ¾ÒÌ¾ÐÏ¾ÑÑ½ÒÒ»ÐÏ»ÑË¹ÏÑ¹ÎÎ¸ÐÎ¾ËÐ¹ÒÎ»ÎÏ½ÐÑ»ÐÎ¾ÏÎ¾ÎÐºÑÐ¹ÏÍ½ÌÑ»ÐÎ¼ÎÎ»ÌÎ»ÌÌºÎÎ¼ÎÎ¾ÍÏºÎÍ»ËÌ¾ÎÎ»ÎÌ¹ÌÌ½ÏÌ¼ÌÎ¸ÌËºÌÎºÎÎ»ÌÊ¸ÌÐ»ÌÌ»ÎÍ»ÎÌ·ÏÊ¸ÌÊ¸ÌÌ»ÍÌ»ÌÉ·ÊÌ»ËË·ËÊ¹ÊÌ·ÌÌ»ÌÌ·ÊÈ·ÎË¹ËË¸ÊÈ¹ÌÇ·ÊÊ¸ËË¹ÌË·ËÊµÊÇ¸ÌÈ·ÈÈµÉÆ´ÉÈ·ÅÇ¸ÈÆ¶ÇÄµÈÆ³ÇÆ¶ÉÈ²ÈÇ²ÈÆ´ÈÄµÇÆ¸ÉÆ³ÄÇ´ÈÅ´ÈÄ´ÈÈµÈÉ®ÃÆ´ÆÇ²ÄÄ³ÆÄ±ÅÆ·ÅÇ¸ÉÆ²ÄÂµÄÆ³ÈÄ±ÄÆµÆÄ³ÅÃ´ÆÅ³ÃÄ²ÈÁ³ÅÆ°ÃÆ³ÇÃ²ÃÂ±ÃÂ²ÆÅ°ÄÃ´ÄÃ°ÄÄ°ÃÃµÄÁ°ÃÄ®ÃÂ²ÃÃ±ÃÃ°ÄÂ²ÄÁ±ÃÃ±ÃÁ°Ã¿±ÁÃ³Ã¿²Ã¿±Ä¿±ÁÁ®ÃÁ³ÂÃ¯ÃÀ­ÂÁ®Á¿´ÁÁ­ÂÀ¬¿¿­À¾®Ã½±À¿®À¾­Ã¾¬À¿­ÀÀ®ÁÀ¯¾À¬½Á°¿¾®¾½®Á¿¬Á½­À»¬¾¿¯¿¼¬¿¾°Á»°¿Á¬¾¼¬¾À­ÁÀ©¾½²¾¾­¿À¬¾º¬¾½­À¾®½º«¾¼®¾¾¬À»©¾¾¬¸»¬½¾¬¾º®¾½¨¾¹§¼»¬¾»¬Á»ª½ºª¼½«¾»ª»·ª»¸©¼¹«¼¸¨¾½«»¹¬½¸¨½»«¸¹ª½º¨¾»¬¾¸§»¶©»·ª··§º·§¹µ©º¹¥»µ¦»µ¨º¶©»µ¤·¹¨¹·ªº½­½½®¾¼­À½®À¾¬Á¿¬Á¾®Â¼©ÁÁ¬ÁÀ«¾»¬Â¼¯ÁÀ®À¿¯Ã»ªÃ¾«¿¾¯Á¾¬Ä¾¬Á¿¯¿¿¬Æ¾¬Ã¿¯ÃÁ¯ÁÁ®Æ¾­Á¾¯Ã½­ÂÁ«Ã¾§Á¿¬Å¾¯ÅÀ¬ÁÁ°ÃÂ®Ä¾¯ÃÁ¯Å¿¬ÁÂ²ÃÂ°ÅÁ®ÆÀ±Å¾­ÃÀ±ÂÀ¯Ä¿°ÇÃ®ÅÂ³ÆÁ³ÅÃ³ÈÃ²ÇÃ²ÄÁ®ÄÃ®ÅÁ³ÆÃ°ÆÃ³ÇÄ³ÆÅ±ÈÂ³Ä¿®ÅÅ³ÇÁ³ÈÄ°ÂÂ±ÉÃ²ÅÂ²ÉÆµÈÈµÆÃ²ÇÁ¶ÈÂ³ÆÃ³ÅÅ·ÈÆ´ÊÄ´ÈÆ¶ÉÈ´ÈÄ±ÊÅ³ÆÈ·ÈÄµÈÆ²ÉÆ¶ÌÆºÌÆ·ÈÇ³ÉÆ¹ÈÈ³ÉÇºÎÆ³ÉÉ´ÊÇµÌÆ·ÌÆ³ËÈºËÈ³ÈÇ¹ÊÇ´ÉÅ³ÈÊ¶ËÈ¸ÌÆ·ÌÇ¶ÌÇ·ÎË·ÍÊ´ËÈ»ÌÊ·ÍË·ÌÈ¶ÊÈ¶ÐÉ¶ËËºÎÊ³ËÈ¸ÌÉ·ÐÊ·ÎËµÊÈ´ÊÌ¹ËÆ·ÌÈ¹ÊË¹ÍÌ·ÌÊ¸ÍÉ¶ËÊ³ËË¼ÍÊµÍË·ÎÌ·ÍÊ»ÌÍ¹ÑÌºÏÊ·ÎÊ·ÍÌ·ÍË¶ÎÊ·ÌË½ÍÌ¹ÑÌ¼ÎÍºÐÉ¸ÎÌºÏÊ·ÍÌ»ÎÊ¸ÏÌºÏÈ»ÐÌ·ÎÎ¹ÒÌºÎÎ¼ÐÎ»ÓÌ¹ÍÌ¸ÐÒ»ÎÍºÑÐ¼ÒÌ¾ÐÎ¹ÌÐ»ÑÐ·ÐÎºÒÎºÒÏ¾ÒÍ»ÐÐ¾ÓÐ·ÐÌ¶ÎÍ»ÐÍ»ÐÌ»ÎË¹ÎÐ¹ÐÎ»ÒÐ¼ÑÎ¾ÓÐ½ÐÒ½ÔÏ¼ÒÎ»ÓÒ»ÒÎ½ÑÐ»ÓÕºÒÎ¼ÒÒÁÒÍ¿ÐÍ½ÒÒ¾ÒÐ¼ÓÑ½ÒÏÁÓÒ»ÓÐ»ÕÎ¿ÒÐ»ÐÎ¹ÖÐ¾ÓÒ»ÒÐ½ÓÓÀÒÑ»ÒÐ»ÓÒÁÐÒ¾ÓÔ¼ÖÐ¿ÕÓ¾ÒÒ¾ÕÐÀÓÒ¾ÕÒ¾ØÐ¾ÐÑ¼ÖÖ¿ÕÐ¾ÕÖ¿ÔÓÀÕÒ¼×ÓÁÔÓ½ÕÓ¿ÕÒÀÔÐ¼ÕÒ¾ÕÕÁÚÖ¿ÔÕÀÔÕÁÖÖÃÙÒÀÒÔÃÓÕ¿ÕÓÁÕÓÂÓÔ¿ÕÔÀÒÒ¼Í¾ª¼¡©oxdo`o`xq`{zb~fiiltqz¤z¤° »¬Æ²Ë ¹Õ«¾ê·ÊõÄÒúÐÜúÑÝúÒãúÕäúØèúÚëúÛëúàìúßìúÜïúáñúãòúçòúäòúçôúçõúèòúèòúäóúèõúè÷úçøúèøúêøúêùúïúúëúúîúúíúúîúúòúúðúúðúúñúúñúúóúúòúúòúúôúúòúúóúúöúúúúúúúúúúúúúúúúúúúúúúúúúúúúúúúúúúúúúúúúúúúúúúúúúúúúúúúúúúúúúúúúúúúúúúúúúúúúúúúúúúúúúúúúúúúúúúúúúúúúúúúúúúúúúúúúúúúúúúúúúúúúúúúúúúúúúúøúú÷úúöúúõúúóúúñúúñúúõúúôúúõúúïúúïúúíúúéúúìøúéúúêùúè÷úåöúéöúä÷úåöúãõúäóúæõúáõúàïúÙïú×ïúÖîúÛëú×ïúÔçúÐäúÑäúÎÞúÎàúËßúÊÙúÉÙúÈÙúÆÖúÂÑúÄÍú»Ì÷½Íñ½Ëï·ÆïµÇî´Æä®¿Ü­»à°½Ý¬¼Þ¯»Ù­»Ú®¹Ö©´Ñ¨³Ê£³Ç­¹¦©tqolxfdzd|nY{l]xnWzkWqlYobQqfWtg]xlY~|l»«·Î»ÇÓ¿ÑÓÃÓÕ»ÕÕÀÑÖÁÕÓÂÕÓÁÖÖÀÕÖÁÔÕÁÖÖÀÒÒÀÔÓ¿ÓÒÄÓÕ¾ÕÒ¼ÐÔÃÓÓ¾ÓÕÂÔÕÁÖÕÁÓÓÂÕÕÂÐÕ¾ÖÐ¾ÕÔÁÕÓ¿ÔÕ¾ÖÓÁÑÒ¾ÒÓ¿ÓÒÀÓÒ¿ÎÓ¾ÖÒ¿ÕÐ¾ÐÏ¾ÓÒ¿ÐÓÀÑÑ»ÎÑ¿ÐÐ¼ÓÓ»ÒÐ¾ÔÏ¾ÒÐ¾ÒÒ½ÑÍ½ÑÐ¿ÏÐ¾ÐÎ¼ÓÎ¾ÒÎºÏÐ¼ÒÏ¼ÕÐ¾ÏË¿ÌÌ»ÒÍ»ÏÌ¼ÐË¹ÐÍºÎÎ½ÑÎ¹ÒÎ»ÍÌºÐÌ¾ÐÍ¹ÍË·ÌÊ¹ÎÌ¾ÐË¼ÍÌ¹ÏË¼ÎÏ¹ÌÍ¼ÍË´ÍÌ¸ÌÌ¼ËË¶ÌÊ¹ËÊ»ÌÊ¹ÎÉºÌÊºÊÌºËË·ËÉ·ÌÈ»ÍÊ»ÊÊ¶ÊÈ»ÌÊ·ÎÈ·ÉÈ»ÈË¶ÊÇ·ÇÈ¸ÉÈ·ÉÈ¶ËÈµÈÉ·ÌÈ¶ÊÆ¸ÊÈ´ÊÈµËÊ·ËÉ¸ÌÉ´ÊÇµÉÈµÌÇ·ÉÆ¸ÇÆ·ÏÈ³ÈÃ·ÈÈ¶ÈÅ·ÊÇ´ÆÈ´ÆÅ³ÇÇ³ËÅ·ÈÃ³ÇÅ·ÈÆ³ÈÄ³ÊÅ²ÈÃ·ÃÆ´ÈÄµÆÃ³ÆÆ³ÈÅ´ÈÂ¶ÈÅ³ÇÃ³ÄÁ·ÃÃ°ÅÃ´ÄÁ³ÄÀ³ÈÁ²Ä¾´ÁÆ³ÃÃ³ÈÃ°ÃÁ¯ÆÃ±ÄÃ³Ã¿°ÃÁ±ÂÁ®ÁÃ³ÆÁ³ÅÁ®ÁÁ³ÄÁ±ÃÃ²Ã¾³ÁÁ²ÆÀ®Ä¾³Å¿°ÅÁ¯ÃÀ±ÃÁ³ÅÁ³Æ¿¯Ã¿´Á¿°Â¿®Æ¿¯ÃÁ¯ÂÁ³Å¾°¿Á³ÆÂ±Á¾´ÂÀ¯Æ»®¾À®¿À°½¾¬Á¿®ÄÀ®¿¾¬¾¼ª¾À®¾¿¬Â½¯À½®À¼¬¿¿¬¿½­À¿¬À½¬Á»¯½»¬À¹­¾·«½º§¼¾¬¾»¬¾°¤¸º¥º·¤·º§½¹¦¹¹¦»¹¨»»¦¾¸©»¸ª¸·¦½·§¿¹¨¼»¨»»¥º»¨¿½§¾»¤»º«½º©»·§¾º«»»¨¾¸©½¾«¾¸¨¾º¨»¸«¼¹¥¾¼§¼·§¼»§¾»¦¾º«»º¨¾»©¿½¬¿¼¬½¿¬À»«À¼¯¾¼«Á½«½¾«À¼©¾½ª¿¹¨¾»¯¿¼¨Á¿©Á¼«¿½«¾½¬¿½«¾ÀªÁ¿°¾¿«ÁÀ­Ã¾¬Á¾­À¿¬ÄÀ­Á¾°¾¿®ÁÁ«Ä¿¬ÂÂ¬ÂÁ®Ä¿¯ÃÀ®ÃÀ¬Á¾®Ã¾®ÃÃ®ÆÀ¯ÆÁ±ÄÂ¯Á½¬ÃÁ®ÄÁ²ÅÀ²¿Á®ÆÂ¯ÃÆ°ÅÁ²ÄÄ®ÅÃ°ÅÃ±ÆÄ²ÅÄ­ÄÆ²ÆÃ°ÈÂ°ÆÁ¯ÃÂ±ÆÄ®ÇÃµÇÃ®ÄÄ³ÄÃ²ÄÃ²ÅÃ°ÆÆ³ÆÄ²ÄÆ²ÇÃ±ÄÅ²ÈÅ²ÆÃ³ÈÆ³ÇÃ³ÈÆ²ÅÅ²ÆÆ³ÊÃ°ÆÃ³ÇÄ®ÇÃ²ÇÃ³ÊÈ±ÇÆ²ÅÆ´ÈÄµÈÆ±ÊÄ³ÅÆ°ÇÆ³ËÅ²ÆÆ¶ËÃ²ÉÈ´ÊÆ´ËÈ·ÊÆ²ÊÇ±ÈÇ°ÌÆ´ÆÂ°ÇÇ´ÌÈ´ÈÇ³ÉÆ¶ÈÈµÌÇµÈÇ´ÇÆ¶ËÅ´ÊÈ±ÈÅ³ÌÈ¸ÈÊ³ÈÇ³ÊÆ¶ÉÈ·ÊÆ³ÊÉ·ÌÉ³ÎÈ´ÊÈµÌÊ·ÍË¶ÊÇ³ÊÉ·ÊÊ·ÌÉ¹ÊÉ·ÎÇ³ËÊ·ÍÈ¹ÌÌ·ÊÌ¶ÊÈ¸ÊË¶ÌÌ·ÌÊµËË·ËÉ¶ÌÈ·ËÊ·ÎÊ¸ÍÊºÌÊºÏÌ¸ÎÎ¸ÌÌ¸ËÈ·ÎÍ»ÌÌ¸ÎÌ¸ÐË·ÌÊ¹ËÍ¸ÐË¸ÐÍ»ÎÌ¹ÐÌ·ÎÊ¹ÐÍ»ÏÉ³ÏÎ·ÌÊµÐÉ·ÏÊºÍÌ¼ÐÊ»ÎÌ¸ÍÌ»ÎÏ¹ÍÎºÍÌ»ÍÍºÏÌ¹ÎÍ¸ÌÎ»ÎÍ»ÌÌ»ÏÎ»ÎÎ¸ÍÍ¸ÐÏ¾ÐÍ¹ÐÏºÏÏ»ÐÎºÏÐ¼ÓÍ»ÐÎ»ÎÌ¾ÐÏ½ÐÐºÍÍ¹ÏÎ½ÒÐ¼ÑÒ»ÒÐ»ÐÒ¾ÒÎ»ÎÐ»ÐÑ¹ÒÍ½ÏÊ¾ÎÍ»ËÊ´Å¸¢º¤tbkY~gSxlSqlWqq]zz]xw_zgdiorw¦«µ¦À¦ÌµÕ¨¸ç·ÃõÃÌúÈÕúËØúÏÞúÑÝúÕâúÔåúÕåúØæúÛèúÛëúÛìúßíúßíúáïúâîúàïúäñúâñúãðúàôúáòúâóúåôúè÷úê÷úåöúéöúçøúê÷úê÷úëøúéùúëúúëúúìúúìúúðúúïúúðúúñúúòúúöúú÷úúúúúúúúúúúúúúúúúúúúúúúúúúøúúùúúúúúúúúúúúúúúúúúúúúúúúúúúúúúúúúúúúúúúúúúúúúúúúúúúúúúúúúúúúúúúúúúúúúúúúúúúúúúúúúúúúúúúúúúúúúúúú÷úúõúúõúúóúúõúúñúúïúúìúúîúúíúúïúúîúúìúúêúúäúúãøúçøúçöúæ÷úâôúäôúãöúàóúÝðúÜïúàïúßïúßðúÜîúØèúÔéúÕèúØçúÒæúÌáúÏàúËÜúÊÜúËÚúÈÙúÆÖúÇÕúÇÔúÄÒú¿Ðù½Ìõ»Êô·ÊóºÆï³Ãì±Ãè²Àå­¾Ý©¹Û©¶Úª²Ù¨¸×©³×«³Ó§®Ê¤­Ê®Ã«»¤¬wnni_n_xz_znSu_SldQi`QkbSg]Og[MgYIgbUqr`|{«©È¶ÁÐ¾ÊÏ¾ÏÎ¸ÏÐ¾ÐÏ¾ÎÐ»ÐÏ¼ÐÎ»ÐÓ½ÐÐ¾ÐÏ½ÎÍ½ÒÌ»ÐÌ¾ÍÎ»ÏÏ¼ÏÉ»ÎÐ¼ÎÐ¹ÏÏ¾ÑÐ¾ÍÍ¸ÒÎ·ÏÒ¼ÎÑ½ÎÏ»ÎÎ»ÏÏ»ÑÏ½ÎÐ»ÎÒ¸ÎÎ»ÍÊ¹ÊÎ¼ÊÎ·ÌÏ»ÊÏ»ÎÌ»ÍÌºÌÐ»ÏÌ»ËË»ÌÌ¸ÎË¼ÍÏºÎÌ»ÌÌ¸ÌÌ½ÌË½ÎÌ¸ÌÈºÊË·ÉË·ÌÊ¹ÈÊ·ÊÉºÊÌ¸ÍÈ·ËÊ¸ÊÌ·ÍÈ¹ÌÈ¸ËÊºÈÈ·ÊÊ´ÉÊ¹ÊÊ³ÊÊ¹ÊÆ³ÈÇ´ÈÈºÉÈ´ÈÄµÆÇ¸ÈÉ·ÈÈ³ÆÄ³ÆÆ´ÈÇµÈÆµÇÆ²ÆÆ³ÅÅ¸ÇÈ·ÈÇ´ÆÆ³ÇÅ³ÇÆ³ÈÅµÇÆ³ÃÅ³ÄÄ¶ÃÃ³ÆÅ³ÆÆ³ÃÃ²ÈÅ³ÅÆ²ÅÅ±ÄÇ²ÄÃ´ÄÅ±ÃÇ±ÅÂ±ÄÅ³ÂÄ±ÆÁ²ÃÃ³ÄÃ³ÄÁ°ÆÁ³ÄÃ°ÆÃ¯ÃÃ²ÂÀ¯ÄÃ²Å¿±Ã¾´ÆÁ±¾Á°ÆÁ¯Ã¿²ÃÁ³ÂÁ¯ÇÁ±Ã½°ÁÁ±ÁÃ²Â¾°À¾°ÂÁ¬Á¾­ÁÀ±Á½²Á¾¬ÂÁ¯ÂÁ®ÂÀ®Ä¾°¼¿­Á½¯¿½¬Â¾®Á¾®¿½¯À¾¬¾¾­½À®½¾¯ÁÀ¬Á»­½ÁªÁ½¬¾¿«Á¼«½¾®¿»«Á½®¾½¬¾¾¬¾½­¾¾©À¿®Á¾«»¾«Á½®¾»«¿º«»¾¬½»¬¾¸¬»»©½º«º»ª»¹¬À¼®¾¼«½º©½¸©»¸ª¸¶ª¼¹«»·«½»ª½»ª¹·«º·§»»§¹¸¤º¹©½¹©¼¸«»·©½¸¦»¸¥¸·§¸·¤»¶¨¸¶©·µ¦ºµ¢¸·¥··¦¸·£»´¨º¾¬À¾®¿¼¬Á¾¬¿½¬Á¿¯Ã¿¬Â¼­Á¿¯¿¾¯À¼¬À¼­ÃÀ­Â¾­Á¾ª¿À®¿½¯¿¾©À¾®Ã½¬Â¾¯ÀÀ°Ä¿¬¿Á¬Á¾¬ÀÁ­ÅÁ®ÄÁ­Ã¾­Â¾¬ÃÁ®Å½¬ÂÀ¬Â¿¯Ã¿¯ÅÀ­ÄÁ±Á¿­Ä¿±ÃÁ®ÃÂ°ÅÃ®Æ¿±ÅÂ²ÆÂ®ÃÀ²ÃÁ°ÅÁ°ÆÂ³ÆÁ±ÆÃ®ÃÃ¯ÆÁ®ÄÂ°ÆÅµÅÂµÉÁ®ÆÅ±ÆÂ³ÇÃ³ÊÅ³ÅÃ¶ÆÃ±ÉÁ³ÉÃ´ÈÅµÊÄ³ËÄ·ÅÆ´ÈÈµÈÃ´ÊÅ·ÇÈ´ÈÄ´ÊÈ´ÆÆ·ÊÆ´ÈÆ·ÈÆ³ÇÃ¶ÈÈ¶ÇÄµÇÆ³ÉÇ·ÉÆ´ÊÅ³ÊÈ¶ËÈ¹ÊÇµÉÈ¸ÈÈ·ÉÄ¶ÊÊµÎÉ´ËÇ¶ÌÈºÌÈ¶ËÊ·ÌÆ´ËÉµÊÊ³ÊÈºÊÇ¸ÉËµÌÈ·ÇÆ´ÌÈ·ËÅ·ÍÈ·ÌÌµÍÈ·ÊË¹ËÊµÌÊ³ÌÈ¶ÌÉ³ÌÈ·ËÊ·ÏÊµÏÈ·ËÊºÌË¹ÎÈ³ÌÈ¸ÎÊ·ÍÈ·ÎÉ¹ÉÈ·ÐÈ¹ÊÊ»ÎË¶ÍË·ÍË·ÎÌºÏÊ¶ÐÈ¹ÌÌ¶ÒÌºÏÈ·ÌÉµÌÉ¸ÍÌ·ÑÇ¹ÊËµÎË¹ÐÍºÎÌºÎÊ¹ÎË»ÍËºÑË·ÐÊ½ÐÐ·ÐÎºÑÍ¹ÎÊµÏÐºÐÊ¹ÑÌ¾ÎÍ¹ÐÌ»ÐÎ»ÒÍ»ÐÎ¾ÐÌºÑÒ½ÐÍ»ÐÐ»ÑÍ»ÎÎ¾ÓÎ»ÐÐ½ÒÐ½ÐÏ½ÐÌ¸ÕÍ¹ÐÐ¼ÎÏÀÕÐ¼ÐÑ½ÒÐ»ÓÒ½ÕÌ¼ÐÑ¾ÓÒ¹ÖÐ¾ÒÐ¾ÐÐ¾ÓÐ»ÓÐ¾ÓÑ¾ÒËºÒÒ¼ÓÐ»ÕÒ¾ÓÐ¾ÑÒ»ÓÐ»ÒÒ¼ÒÒ½ÐÒ¿ÕÐ¾ÐÐ¾ÕÑ½ÕÒ¼ÒÎÀÕÎºÓÐ¾ÖÐ½ÕÒ¾ÕÌ¾ÒÍÁÒÒ¾ÓÒ¾ÑÐ¿ÓÐ¿ÒÒÁÓÓÀØÖ¾ÓÓ¿ÕÔ½ÕÓ¿ÕÓÁÔÓÁÖÕ¿ÔÑ½ÑÕÄÔÑ¿ÖÒ¾ÒÓÃ×ÕÀÖÒÀÖÕÀÕÓ¾ÔÒÀÕÓÂÖÒÂÕØÁÛÒÀÕÓ¾ÓÒ»ÒÈ¸È³ ·£|kw`q]|o[z|fzkgliqru{¥­ °§·ªÂ²Î¤»Ü³¿ô½ÊúÄÐúË×úÍÜúÖàúÙäúÛçúÙèúØëúÜíúàíúÞïúâðúâòúãðúãòúèôúæóúçñúéöúæõúä÷úäöúçõúêùúïøúíúúïúúêøúíúúïúúíúúíúúïúúðúúñúúðúúñúúôúúõúúöúúöúúõúúúúúúúúúúúúúúúúúúúúúúúùúú÷úú÷úúúúúúúúúúúúúúúúúúúúúúúúúúúúúúúúúúúúúúúúúúúúúúúúúúúúúúúúúúúúúúúúúúúúúúúúúúúúúúúúúúúúúúúúúúúúúúúúúúúúúúúú÷úú÷úúøúúøúúöúúóúúôúúõúúôúúóúúõúúíúúëúúìúúëùúê÷úê÷úêúúëùúìøúìøúéôúßóúÝóúàôúæñúãóúÝðúÛïúßíúÙïúØéú×ëúÓèúÕåúÒâúÎàúÐÝúÎÜúÌÛúÈÛúÊÜúÊÙúÃ×úÃÓùÂÐø»Òô¿Ëõ»Ëô¼Éð¹Çì³Åâ¯Ãà¯»â±¾Û¯ºÛ°·Ú®¹Ù¬·Õª³Î§·Ê¡±¾¬µ¦­¡rnk{`|x]t_zg]wi[rgYtoYuk]ufUugWqk`uud·¤±Ì¹ÆÓ¾ÎØÂÒÕ¾ÕÕÂÕÔÂÔÖÁÔÓ¿ÕÒÁÖÖ¾Ô×¾ÓÓÃÓÒÀÖÓ¿Õ×ÃÕÓÀÕÓÀÕÐ¿ÕÖÁÖÕÁÕÕÁÕÕÃÒÒ¾ÒÓÀÒÕÁÒÓÁÒÒÂÕÒ¿ÓÒÁÓÐ¿ÓÒÂÕÔÁÓÒ¾ÒÐ½ÓÑÁÒÎ¾ÔÓ¿ÎÓ¿ÓÓÀÒÐÀÒÒ¾ÒÑ½ÎÐ¾ÐÑ¼ÔÎ¾ÒÏ¾ÒÒÀÓÎ¼ÐÏ¾ÒÐ¾ÐÐ½ÓÎ¼ÐÏ¾ÎÑ¾ÒÍ¼ÎÎÁÎÎ»ÑÌ¸ÐÌ¼ÍÌ»ÎÎ¼ÐÏ»ÎÎ¼ÐÎ»ÎÌ»ÎÌ½ÐÍ»ÐÌ»ÎÎºÐÍºÌÌ»ÍÎ»ÍÎ¸ÎÌ¼ËÌ½ËÊ»ÌË»ÊÈ¹ËËºÎÌ½ÊÊ¹ÎË¸ÌË»ÎÉ»ÌÈ¹ËÌ¸ËÌ¹ÎË»ÎÉ¸ÎË·ÊË¹ÉÈ·ÌÈ¹ÉÈ»ÊÊ´ÌÈ¹ÊÉ¹ÏÊ·ËÇ¶ËÈ·ÉÆµÌÈ·ÊÈ¹ÊÈ»ÌÊ»ÊÈ¶ÆÆ¹ÊÇ¶ÌÆµÈÆ·ÊÇµÇÈ¶ÈÆ¶ÈÄ¶ÇÈ·ÌÇµÈÇ³ÇÆ³ÈÈ¹ÇÄ´ÇÃ´ÆÆ¶ÊÉ·ÈÆ¶ÇÆ³ÇÄ²ÇÆ³ÈÆ¸ÆÉ³ÉÃ¯ÆÂ³ÆÄ¶ÈÅ³ÈÃ³ÅÅ³ÆÁ²ÆÃ´ÅÅ°ÆÅ´ËÄ³ÄÁ¯ÉÁ·ÅÁ³ÈÅµÆÂ³ÃÁ³ÄÂ±ÃÂ´ÆÂ±ÂÀ±ÅÀ±ÂÃ´ÁÁ²ÆÁ±ÂÂ°ÃÁ³ÀÂ±ÅÁ°ÁÁ³ÃÀ°ÃÁ¯ÅÁ²ÁÂ±ÅÁ³Ä¿³ÀÂ°ÈÁ°ÆÁ³ÁÂ®ÂÁ¬ÁÀ±Å¿¯Á¿±ÂÁ­ÃÀ­Ä¿°ÃÁ±Ã¾°ÂÁ®Á¿¯Ã¼°ÁÀ®Ã¾¯¿»¯Á¿­Á½¬À¿­¾»®À¾«Â»­À¼®Â¼ªÃ»­¿»¬¾¾¬¿¼®¾»¬½»«»¼®¾¼®À·«¾¼¬¾»¬¿º®Áºª¼®¥µ¸¦»¸©»¹§¸¹¦»·¥½¹¦»»ª¼¸©¿»«»µ©»¸¨»·¨¹º§»¸¦¾·¦½¸©»¹¦»·«½·¨½»§¼¸ª»»©»»ª¾»¨À·ª»ºª»¸«¾»¬¾¸§»¾¬¾º«¼»§¾¸©¿»©»»¬Á¾¯¾»«¼»ª¼»¨¾¼©¾»«Á¸©Á¿«½»«¾¾ª¿º«À½¬¾¾¨Á»¬Á½²À½«Ã½©¾¿­Â»®Á¾«Á»®Á¾®Â½­ÀÀ¯¿À­Ã»«Â¼¬Á¾®Â¾«¿¾­ÃÀ­ÂÀ«ÄÁ¬ÄÁ®Ã¿®Ã¿°ÃÃ®ÆÃ°ÄÀ°ÆÃ²Ä¾¬Ä¿®Ã¾²ÇÁ±ÄÃ¬Ã¾³Å¾®ÄÁ¯ÆÀ³ÆÂ°ÇÅ­ÆÁµÃÀ¯ÂÄ³ÄÃ²ÂÃ°ÈÁ±ÈÀ®ÄÅ¯ÇÃ±ÆÂ³ÃÁ¬ÇÂ¯ÈÄ¬ÆÃ´ÃÄ°ÆÂ³ÄÂ³ÆÄ²ÈÃ²ÆÅ³ÇÁ°ÈÁ²ÇÃ³ÄÃ³ÈÃ³ÆÃ³ÈÅ´ÈÄ°ÆÃ²ÅÃ±ÈÆ³ÆÃ²ÇÆ´ÈÇ±ÈÃ±ÈÃ²ÌÄµÌÂ²ÆÆ²ÆÃ±ÉÆ±ÆÄ·ÊÆ´ÉÄ°ÉÃ´ÆÆ³ÉÆ³ÆÅ²ÆÅ°ÊÅ¶ÊÃ²ÈÆ³ÉÆ²ÊÆ¶ÊÆ²ÊÆ´ÈÆ³ÈÈ´ÊÅ³ÉÄµÊÃ·ÊÈ¶ÎÃ³ËÅ³ËÉ³ÊÈµÊÆ¶ÊÈµÍÈ³ÊÈ·ÉÈ´ÊÆµÉÈ´ËÊ¶ÌÈ¶ÈÇµËÊµÍÊ·ÈÈ¶ÊË¹ÊÈ·ÎÈ·ÎÇµÉÉµÊÎ·ÌÉ¸ÎÈ³ÍÊ¹ËÉ¸ÊÊ¸ÍÍ´ÌÉ¸ÎÍ¹ÌÉ¸ÎÉ¸ÎÈºÎÌ·ÎÊ»ÏÈ·ÌË¹ËÈ¸ÌÊ¸ÎÊ³ÍÊ»ÌÍ¶ÍË·ËÊ·ÌË·ÊÍ¸ÎÊ»ÌÊ¹ËÌ·ËÈ·ÊËºÎË´ÌÊ·ÐË¸ÌÊ¸ÎÉºÎÊºÎÌ¸ÎÌ»ÌÊ¸ÏÍ¹ÏÎºÒË¹ÎÊºÌË½ÎÎ»ÒÊ»ÐÊ»ÍÌ½ÐÎ»ÎÎºÎÌ»ÏÍ¾ÐÎ¸ÏÍ»ÎÏºÏÏ»ÎÐ¼ÒÎ½ÐÎ»ÏÎ¼ÒÒ½ÏÒ»ÏÐ¸ÏÏ»ÏÏ»ÐÐ½ÏÎ·ÏÍ»ÒÒ»ÕÏÁÏÏ»ÌÇµÁ·¯|tgkWwiWukUtn]ur]{t_{z[zddnoxz¡¬£µ£º¬Ì¢·áª¼ç¹ÆðÀÎ÷ÆÓúÌÖúÑÚúÕàúÐßúÕãúÓäúÖäúÚéúßîúÞëúàïúáîúáïúäïúßðúãòúáðúâðúâñúâôúäõúéóúé÷úèöúä÷úèöúå÷úæøúè÷úéùúéúúïúúíúúíúúîúúðúúòúúðúúòúúóúúõúúöúúùúúúúúùúúúúúúúú÷úúòúúñúúòúúöúúúúúúúúúúúúúúúúúúúúúúúúúúúúúúúúúúúúúúúúúúúúúúúúúúúúúúúúúúúúúúúúúúúúúúúúúúúúúúúúúúúúúúúúúúúúúúúùúúøúúõúúôúúòúúòúúóúúïúúñúúñúúðúúñúúêúúæùúåöúçöúåùúè÷úæöúäöúçõúèöúäôúÛòúàðúÜîúÜïúÙêúÝíúÖìúÔæúØçúÓåúÒãúÒáúÏãúÏÝúÍØúËÛúÊÛúÊÖúÆÚúÈÔúÆÒúÄÓù¿Î÷¾ÌöºËô¾Èò¸ÆòµÃìµÅç®¾ã¯¼Ùª·Ö¦·Ù¨³Õ¦³Ó¥³Õ©²Ó¥³Ð¥¬Å­¾¤³ ©zod_t_zn]ulQtdMnYOnWMk_Oi_Oi_Qg_Qn_Uon]zx®¤©Ì¸ÂÌ¹ÊÐ½ÌÎ¿ÐÎ½ÒÐ½ÐÐ¾ÒÎ»ÐÓÀÐÎ»ÒÏ»ÐÒÁÐÒ½ÑÓ»ÒÎ¼ÒÒ»ÔÒ¿ÑÐ½ÌÎ»ÎÐºÏÌ»ÒÎ¼ÒÌ¾ÏÎ¼ÎÎ»ÎÎ»ÏÏ¾ÐÎ¼ÎÑ¾ÒÎºÏÎ»ÍÌ»ÎÏ»ÐÎ¼ÍÊ»ÎÌ»ÍË»ÍÌºÏÊ·ÎÊ¸ÊÎ»ÎÎ¸ÎÈºÌÊ½ÎÌ»ÎÎ¸ÎÌ¸ÌÌ¹ËÊ»ÌË·ÌÉ¹ÉÈ·ÊÌºÌÊ¸ÊÊ·ÌÈ¸ÉÊ¸ÌÉ¶ÊÌµÊÊ»ÊÊ·ÊÉ¶ÉÆµÌÊ·ÈË·ÊÈ¹ÊÆµÈÃ³ÆÈ¶ËÅ·ÈÄ·ËÆµÇÈ¸ÊÈ´ÈÇ¸ÉÅµÆÇµÇÆ¶ÈÄµÊÆ·ÇÈ¶ÇÃµÆÇ´ÊÅ³ÆÆ¸ÆÆ¶ÈÃ¯ÇÆ³ÆÃµÆÇ¸ÈÄ·ÆÂ®ÊÇ´ÆÃ²ÆÃµÇÄ²ÅÃ´ÆÆ³ÇÄ­ÆÂ³ÅÃ°ÄÂ±ÅÂ³ÄÅ³ÅÂ±ÅÁ³ÆÅ³ÅÂ±ÄÂ¯ÆÀ³ÃÃ¯ÃÃ¬ÃÃ²ÃÃ³ÆÃ²Á¾±ÄÂ°ÃÁ³ÃÁ­ÄÁ³Â¾°ÄÀ³ÃÁ²ÄÁ«ÃÁ²ÃÀ¯ÄÂ²Á¿°ÄÁ³ÄÃ®Æ¼±Á¾®ÁÁ­ÃÀ¯Á¾®ÃÃ­ÁÁ®ÁÁ²Á¾­Á½®ÂÁ¬Ä»®¿Á®À»«¾¾®Á¾¬Á¿±¾¾°¾½°¼¾­À½®À¼¬À»«¼¾®¿½¬»º®¿»­¾»®¾¹ª½º­¾½¬½»ª»¼­¾»¬¿»¬¼»¬¾¾ªÁ·¬»¹­¼¼ªÀ»°º·¬¾º¬¿»¬»·«¹º¬¾º«½ºª¼¼¨¼·©½·©»¸«¼»§½·§¾¹ª¼¸§»¸«»·§»¸¦»º«¹µ¬½µ§¹µ¥»µ¦·¸¥¸µ¤¶´¨¹¹©··§¸³¥ºµ¦»³§¼³§¶¸ª¸·©ºµªºÁ®¿½­¿¼¬Á¼¬Ã»«Á½²ÁÁ­Ã¹¬Ã¾°À½­Å¼¬Á½®Á¿¬Â¼¬Á»¬Á¾¬Â¿¬À»­Â¿±Á¿©Á½°Ã»°Å½²Ã¾«Á¿°ÀÂ®Ä¾®Á¾°ÃÀªÂ¼¬Å»°Â¿¬Ã¿®Å½«ÁÂ¬Å¾¯Ä¿¬¿¿¬ÃÀ¬Â¿¯ÅÃ²ÈÀ¯ÆÁ±ÂÁ³ÄÁ®Æ¾³ÃÁ­ÆÁ¯ÈÃ¯ÆÁ³ÆÂ³ÈÀ°ÆÆ³ÆÃ²ÅÃ³ÄÁ¶ÆÃ³ÊÃ¯ÈÂ³ÆÂ³ÄÄ±ÈÅ³ÅÁ±ÅÃ²ÆÃ¶ÆÆ³ÈÆ±ÆÄ³ÈÈ±ÆÆ´ÊÃ³ÆÄ³ÈÃ³ÊÇ´ÇÇ´ÈÃ³ÉÆ°ÉÃ¶ÈÇ´ÉÄ´ÇÈ¯ÌÄ´ÈÆ³ÊÃ³ËÅµËÃ³ÇÂ·ÇÅ´ÊÅ³ÊÆºËÈ³ÊÆ·ÊÆµÈÈ·ÌÆµÊÈ·ÈÉ·ÊÈ´ÐÉ³ÊÆ¶ÉÆ¶ÌÈ¸ËÈ¶ÉÇ¶ÏÈµËÈ³ÊÈ·ÌÈµÌÊ·ÌÊ·ÏÈµÌÈ·ËÉ·ÎÇ³ÌÊ¹ÉÇ´ÎÉ¶ÍÈ¸ÏÉ·ÌÈ¹ÎÊ·ÎË·ÌË¶ÍÈµÍÈ·ÌÊ¶ÍÈµÍË¸ÏÊ¸ÍÍ¹ÏÈºÌÊ·ÏÉ³ÏÈºÎÊ·ÊÊ·ÎÉ¸ÍÍ»ÎÌ·ÏÇºÏÊ¸ÒÌ»ÒË»ÍÌºÎÍ·ÏË¼ÎÊ»ÎÊ¹ÎË¹ÎÊ»ÐË¸ÐÍºÐÍ¼ÌÍ½ÏÎ»ÐÊ·ÍÊ»ÏÌ·ÐÊºÎÌ¹ÐÐ»ÓÎ»ÒÎºÒÌºÐÉºÐÏ»ÑÊ¹ÑÍ½ÐÍ»ÒÌºØÍ»ÑÎ»ÒÐ¾ÓÎ»ÎÎ¼ÏÊ¼ÓÏ½ÎÏ»ÒÑ¼ÒÌºÓÍÁÓÎ»ÓÌ¼ÐÎÁÒÎ»ÓÐ½ÑÊ»ÒÍ½ÐÐ»ÒÏ½ÒÑ¼ÒÏ»ÓÐºÐÎ»ÔÌ»ÒÐ¼ÒÏ¼ÒÏ½ÒÎ·ÐÎ¾ÒÑ½ÓÒ»ÒÎÀÒÒ¿ØÏ¾ÓÐÀÕÎ¿ÓÎ½ÑÑ¾ÒÑ¼ÓÐÁÒÎ¼ÔÓ¿ÕÒ¿ÕÑ¼ÓÐ¿ÒÓ¾ÕÐÁÖÔÂÕÔÀÔÒÀÕÑ¾ÓÒ¾ØÑÀÖÓ¿ÖÔ¾×ÑÀÕÑÀÖÕÅÖÓ¿ÒÒÀÖÕ½ÕÕÀÕÒÀÕÒÀ×Ò¼ÕÓÀÖÕÁÖÒ¾ÖÒÃÑÓ¾ÐÌ¶È¬·|xitdu_~u`{ubub|finnuz¡{¥«¢³¨¾®Ä±Ú¬¼ã³Åä¹ÈðÀÎúÄÖúÎÚúÒßúÓâúÖâúÙæúÕëúÞéúàìúâïúäðúèóúçðúèñúëöúçöúæ÷úåöúçõúæõúå÷úê÷úïúúïúúëúúëúúëúúìúúëúúíúúîúúïúúïúúðúúôúúòúúòúúñúúóúúõúúôúúõúúúúúúúúúúúúúúúúúúúúúúúõúúóúúõúúùúúúúúúúúúúúúúúúúúúúúúúúúúúúúúúúúúúúúúúúúúúúúúúúúúúúúúúúúúúúúúúúúúúúúúúúúúúúúúúúúúúúúúúúúúúúúúúúúúúúúúúúúúúúôúúóúúõúúóúúõúúôúúóúúóúúðúúíúúìúúíúúëúúìøúïúúéøúëöúêöúé÷úæ÷úäôúâõúäôúáòúÞðúÞîúÜïúÙìúÖëúÛéú×éúÔèúÓàúÎáúÎáúÎÝúÍÜúÌÜúÌÞúÐÝúÈ×úÁÕúÂÕùÁÒù½ÎôÀÌø¿ÍóºËîµÆè±Áä­¾Ü¬½Ý¬ºÙ¬¹Ù¯¹Õ§¶Ñ¬¶Ó¯·Ì§²Ä®¼©°£¢~uk~gxgo]{qY|f[wiUu`Sq_Utf[ldWqi[xug~µ¥¬Î¸ÈÒ¾ÎÓÃÔÕÀÕÕÃÕÓÁÖÓÃ×ÖÁÔÓÃÒÕÁÖÕÁÖÕÅÕÓÁÓÒÂÕÔÀÓÓ¾ÓÕÂÖÒÁÑÒ¿ÕÖÁÒÑÁÔÓ¿ÒÓ¾ÕÓ¾ÒÔ¿ÕÐ¾ÒÒÂÓÒ¼ÑÓÁÕÒÁÕÎÁÑÓ¿ÒÒ¿ÕÒ¿ÓÎ¾ÓÐ¾ÓÐ¾ÓÎ¾ÐÕ¾ÐÑÀÓÍ¾ÐÒ»ÒÐ¿ÓÐ¿ÔÐ¾ÒÏ¿ÑÐ¾ÒÐÀÒÐÁÑÐ»ÒÒ½ÒÎ¿ÒÍ¾ÎÑ½ÏÐ¾ÐË»ÓÐ½ÒÎ·ÍÌ»ÒÐ¼ÑÌ»ÑË¿ÐÌ¼ÑÌ¼ÎË½ÍÌ¹ËÉ¼ËÌ»ÍÊ»ÍË¹ËÎ¾ÎÊ¼ÐÐ»ÌÊ¸ÌÈ¼ÐÌ»ÐÉ»ÎÇ¾ÊËµÎÌ»ÌÈºËÇ¸ÎÍºÎÊ¸ÌË»ÊÌ¸ÎÇ¶ÊÉ»ÎÇ»ÍÈ¸ÌÆ»ÊÌ¹ËÈ·ÍÄ·ÊÈ·ÌÉ·ËÇµÈÇ·ÌÆ´ÊÊ»ÈÆ¶ÈÆµÊÇ·ÉÅ·ËÇ¶ËÆ´ÆÇ»ÎÅ¶ÊÈµÌÅ·ËÆ·ÊÁ¶ÈÆ·ÆÆ´ÈÆ·ÉÆ·ÆÆ¹ÉÆ´ÅÄ´ÇÅ³ÊÃ³ÊÃ·ÇÅ¶ÉÃµÈÆ¶ÇÁ¶ÈÇ¶ÈÄ¶ÉÃ³ÇÄ´ÆÆ´ÇÃ·ÈÂ³ÈÃ¶ÅÄ·ÈÉ³È¿³ÃÅµÈÂ³ÆÄ³ÈÁµÃÀ³ÄÅ±ÃÃ¶ÃÂ´ÈÀ°ÆÁ·ÈÁ³ÆÂ³È¾³ÃÃ¯Ä¾²ÇÀ³Ç¾³ÃÀµÃ¾³ÃÁ°Â¿­Å¿³ÆÂ³ÃÁ®ÄÀ³ÁÀ°ÅÃ±Å¾¯À¿³ÅÂ±Ä¿³Á¾®Ã¿¯ÃÁ°Á½³Á¾®Äº±Â¿±Ã¾¯Ã¿®À½®ÃÀ¯ÂÀ¬Ãº­Á¾­Á¿­Á¾°Ã¼¬À¾®À½±¿½°Ä¾­Á¹«½¼¯Ã½¬¿»¬¾»­À½ªÁ¸¬»·¬¹º¬¾»«¿¹¬¾ºª¿»­½¼ª¾»¬¾¼¬¾³§··©¹¸¡¸¸©¼·ª»»¥»·©»·ª¼¹¨»¹©»¸¦ºº§¾µ¤¸·¨ºº§À·©»º¥º·£»¶§¼»©»º¤¼¹¨¾¹§»½©¾·§¾·¨»º¥¾»¨¼¸«¾¹ª½½«À»¬½»«½·¥¾¹©½»ª¾·¦Á¾«À¼¬¾¾¦Â¹¨½»«Á¿©¾¸«¾½«¾¹¬¿»¬ÀÀ®¾¾«À¾¬¾¼«¿¾©Ã½¬Ã¾¬¿½ª¾À«Á¿¬Â¼­ÃÁ®ÂÁ­Á¿­ÂÁ¬¾¾®Á¾®¿¾°Ã¼©À¾¬ÁÀ¯Â¿¯Â¾±Á¾±À¿³ÃÁ¬ÅÁ±ÃÀ®Ã¾²ÃÁ®ÃÁ®ÃÃ¯ÅÀ®ÇÀ¯ÆÁ¬Ã¿°ÃÁ­ÆÀ±Ã¾°ÃÃ®Ä¿¯ÄÁ¯ÄÀ±ÇÁ®ÄÂ³ÄÀ®ÄÁ¯ÄÂ³ÅÃ±ÆÃ°ÇÁ±ÆÃ®ÆÃ³ÊÃ²ÇÁ°ÆÃ°ÇÄ²ÇÅ²ÇÂ²ÇÃ²ÇÄ³ÆÄ°ÇÃ°ÄÅ±ÈÃ±ÉÅµÈÆ³ÈÃ²ÊÆ±ÇÆ³ÄÃ²ÈÃ°ÊÆ²ÊÃµÉÄ²ÇÃ°ÇÄ³ÈÅ¯ÈÂ±ÄÁ²ÈÇ°ÈÄ³ËÄ·ÊÁ³ÇÃ·ÈÃ´ÆÃ±ÊÆ°ÆÅ¶ÊÄ·ÉÅ±ÇÇ·ÇÉ´ÊÆ´ÊÇ·ÈÄµÊÈ·ÊÄ³ÈÅ´ÌÆ³ËÆµÈÆµÊÆ³ÊÆµÈÊµÊÇ²ÉÆ´ÆÈ·ÍÊµÎÆ¸ÊÄ´ÊÆ·ÉÆ³ËÊµËÇµÊÈµÌÊ´ÏÊµÊÉ¶ËÇ·ÎÈµÎÈ¸ËÊ¹ËÊ·ÏÉµÌÆ¸ÍË·ËË·ÏÈµÎÇ·ÎÉ¶ÌÈ¹ÊÊµÎÊºÐÇ¶ÎÈµÊÊ»ÏÊ¹ÌÊ·ÌÍ»ÎÈ·ÎÊ¶ÌÈµÏÈµÍÈ»ÍÊ¹ÌÌ²ÍÊ¼ÍÍ¸ÎÊ·ÏÊ¸ÌÈ¹ÏÉ´ÎÊ¸ÌÊ»ÎÊµÌÈ³ÌÉ»ËË·ÐÌ¼ÍÊ·ÍÌ¸ÎË·ÒÊºÒÌºÎÍ¹ÑÎ¹ÎÍ»ÎÎºÒÌ¼ÐÌ¸ÐÎ¸ÏÊ¸ÎËºÏÎ»ÑÎ¾ÐË»ÐÎºÐÎ»ÎÍºÏÎ¾ÏÐ¼ÒÎ¾ÏÒºÓÎ¼ÐÎ¾ÐÐ¹ÒË¼ÑÑ»ÏÒºÒÏ»ÏÏ½ÑÐºÒÎ»ÎÊ·Æ¼ª½¨nn[oYzdWtoUtlUwlUxwd|~bgnow|¡ª³¤¾¬Å®×©ºÞ«¾ã±Àî»ÊöÁÏúÆÓúÌÝúÏÜúÓáúÒâúÔâúØãúÚåúßçúÜëúâìúäðúãîúâðúâñúâïúàòúãïúáõúæôúèöúéøúéöúçøúèøúæøúå÷úçùúæùúêùúéúúêúúïúúïúúêúúíúúñúúíúúîúúïúúñúúòúúôúúùúúúúúúúú÷úúöúúõúúïúúìúúñúúöúúôúúùúúúúúúúúúúúúúúúúúúúúúúúúúúúúúúúúúúúúúúúúúúúúúúúúúúúúúúúúúúúúúúúúúúúúúúúúúúúúúúúúúúúöúú÷úúùúúùúúöúúöúúòúúñúúíúúîúúíúúìúúîúúêúúèúúçöúèöúæøúèöúäöúæ÷úäöúàòúàóúàôúßòúáðúÛïúÛîúÛíúÙêú×èú×æúÕéúÓæúÒàúÐáúÎÞúËÛúÊÛúÊØúÌÙúÊÚúÈÖúÊÙúÆÖúÁÑùÀÎ÷½Èö½Ìö»ÉõºÆðµÈì´Ãç¬½àªºØ¨·Ö¨¶Õ¦µÒ¤°Ó¤³Ð¦²Ë£±É¬Â¬»£­£rqg|Y{u_zlUxfQqbSn]Qk_OiUKf[Qk_MnbSkf]zzo§¡Æ»ºÒ½ÈÐ¼ÌÑ½ÎÒ¾ÑÐ¾ÎÏ¼ÏÒ¾ÐÐÀÔÓ½ÐÑÁÓÐ¼ÓÐ¾ÐÎ¾ÎÑºÑÍ»ÏÎ¾ÐÐ»ÐÌ»ÐÌ¾ËÐ½ÎÌ¼ÎÑ»ÐÌºÐÎ½ÎÏ¼ÍÏºÏÌ»ÎÌ½ÎË½ÐÏ»ÎË¹ÎÐ»ÐÌ¼ÏÊºÎË¾ÎÌ¸ÌË»ÉÌºÊÌ¹ËÌ»ÌÌ¾ÎÎ·ÌËºÊÈ»ÌÊ»ÌÌºÍÊ¹ËÌ¸ÎÇ»ËÈ¹ÈË»ÊÊ¹ËÊºÉËºÌÊ¹ÈÊ¸ÈÊ³ÊÇ¸ÉÉ¸ÊÉ³ÌÈ¸ËÆµÊÆµÈÊµÉÄµÇÇ³ÊÇ¶ÈÊ´ÈÈºÅÆ³ÆÅ³ÉÆ·ÆÇ·ÊÅµÌÃ²ÇÉ¶ÊÂ²ÇÃ·ÆÆ³ÆÆ¸ÄÆ³ÇÇ´ÅÈ³ÈÈ³ÆÃµÈÃ²ÆÂ³ÆÃµÇÆ³ÇÃ²ÆÃ°ÅÆ´ÈÃ³ÄÆ³ÇÄ²ÉÅ³ÈÆ²ÄÃ±ÃÄµÆÆ²ÃÁ±ÆÄ³ÇÃ²ÅÄ²ÅÇ±ÄÁ¶ÆÃ±ÄÃµÆÂ³ÆÁ²ÄÃ°ÄÁ²ÆÁ­ÁÂ±Å¾±ÅÁ°ÄÁ°ÅÁ±Ä¾°ÄÁ¯Ã¾­ÁÁ´Á¿°ÁÁ°Äº¯ÁÀ¯Ã¼°Á½²ÀÁ±Å¿®ÁÀ°À¿´ÁÁ³Á¿¯ÃÀ¯ÁÁ¬¾¿®À¾­¾¼®ÂÁ±ÀÀ­ÃÀ®Á¼±Á»¬½½¬Ã½¯¾¾®À¾¯Á»¬¿»­¾º¨Â»¬¿»¬Â¾ªÀ»®À½­¾º«À¾¬¾»¬»¼¬½½¬Á¼­¾»­¿º«½º¬¾»¯¾½«À¼¬¾½±¾»¬¾·«Áº«¾»ªÀ»§º·¬¼º«À»«¾¸¬¾»©½º¨½¼¨»¸«½¹§¼·¬»¼§»·¨½·¥½¸«¸·¨¾·«º·¤»¶¨¸¶¤·¶¨¹³¤·¶¦»¶©»¶¦¹¶¦··¦»·§¼¶¨¹·¨·´§»µ«º»®À¼¬Á½«À¼¬¿¾¬Á»¬¿¾®Ã»«Á»¯Á¼¬Á»ª¾»¬À¾¬¿À¬Ã»­¿À®Á»­ÂÀ­Â¼ª¿¾¬ÃÁ¬Á¿¯Å¿¬Â¾ªÄ»­Â¾­ÃÁ©Â»¯¿¾°Å¿¬Å¾®Â¾¯¿½¯ÃÁ­Á¾¯ÂÀ­Â¿²Á½®ÃÀ¯Ã»°ÅÂ²Æ¿«ÄÁ®ÅÁ­ÃÁ´ÈÁ³Å¿¬ÁÃ°ÇÃ¯ÅÂ²ÆÂ³ÆÁ²ÆÃ³ÅÄµÈÃ³ÇÃ³Æ¿±ÆÄ±ÈÂµÆÂ²ÅÄ³ÆÃ´ÃÃ³ÅÂ³ÆÆ°ÈÄ³ÈÅ±ÉÄ´ÈÃ´ÅÃ´ÊÂ³ÆÃ´ÈÅ´ÆÆ²ÈÁ¶ÈÆ¶ÇÃ³ÉÈµÈÆ³ÆÅµËÆ¶ÈÃµÌÄ³ÊÄ³ÆÅ³ÈÅ²ÊÂ³ÉÃ³ÊÃ¶ÌÈ³ÈÅ¶ÊÃ²ÊÇ´ÉÃ·ËÅ³ÊÇ´ËÆ·ÊÆ¶ÌÊµÊÆ·ÌÆ´ÉÉ¶ÊÃ¶ÊÆ¸ÌÆ³ÑÇ¶ÎÉ¹ÍÇ¹ÊÈ·ÊÉ»ËÆ¶ÍÈ·ÎÇ¶ÌÊ¹ÎÉ´ËÈºÌÊ·ÎÈ·ÎÈ¹ÌÈ·ÊÉ¶ÌÊ¹ËÈ¶ÎÈµÌÉ´ÐË¹ÏÈ¹ÍË·ÎÊ»ÌÊµÏÈºÌÊ¹ËËµËÊ¹ÍÈ»ËÊ¸ÏÆºÍÌ¸ÑÎ·ÎÌ·ÐÊ»ÎÌ½ÐÌ¹ÌÉ¹ÎÉºÎÌ»ÎÉ¹ÌÊ»ÎÊ·ÒÈ»ÎÊ¹ÒÌ·ÎÊ·ÎÐ½ÎË¹ÑÌ·ÒÐ¹ÐÍ¹ÐÌºÐÍ¾ÐÎ»ÒË»ÒÌ»ÐÏ»ÒÌ¼ÐÉ¼ÎÎ»ÐÌ¸ÐÌ»ÐÐ»ÔËºÓÍ¹ÐÎ¾ÒÐ¿ÒÐ¼ÑÌÁÑÐ»ÐÍ»ÐÏ¼ÐÎ¹ÒÎ»ÒÎ¾ÐÌ»ÔÌ½ÐÎ»ÓÏ¼ÑÌ»ÒÎ¾ÖÐ½ÓÐ»ÓÍºÑÎ½ÓÑ¾ÎË½ÒÎ½ÓÐ»ÓÐÀÔÐÁÓÐ·ÒÌ¾ÐÎ¼ÓÍºÐÐ½ÓÎ½ÓÐ¾ÑÎ¾ÒÑ¼ÔÏ¼ÓÒ¾ÓÐÁÖÎ¿ÓÏ½ØÕ¿ÕÒ½ÔÐ¾ÓÐÀÕÐ»ÕÑ½ÓÒ¾ÒÕÂÖÓÁÕÐÁÖÒÁ×ÓÂÕÐ¾ÑÑ¿ÖÐ¿ÓÔ¾ÓÒ¿ÖÓ½ØÑÁÖÑÃÖÕ¿ÔÓÂÖÐ¿ÔÑ¿ÖÓ¾ÖÓÃÖÔÁÕÕ½ÐÌ¿ÊÂ¬Ã¬{qt`udlfo_{wb~gnnru{©¬£¶¥»­Å±Ë¡·Ù«ºÞ´Åê´Êò¾ÏøÃÑúÉØúÎÞúÒâúÖäúÙäúÙèúÙëúÜëúÝìúàðúäñúçïúèòúèôúèôúæöúçõúéöúèùúéøúíøúîúúïúúëùúíúúëúúìúúíúúìúúïúúðúúóúúðúúïúúïúúïúúòúúòúúòúúôúúöúúøúúùúúúúúúúúúúúúúúôúúöúúòúúôúúøúúúúú÷úúúúúúúúúúúúúúúúúúúúúúúúúúúúúúúúúúúúúúúúúúúúúúúúúúúúúúúúúúúúúúúúúúúúúúúúúúúúúúúúúúúùúúöúúùúúúúúúúúúúúøúúöúúöúúôúúðúúðúúïúúòúúîúúíúúíúúïúúëúúêúúìúúìúúèùúçöúæ÷úä÷úãóúäõúÛôúÜðúßñúÛðúÛëúÛìúÖëú×èúÕçúÖæúÓáúÓàúÎÜúÐßúÍàúÍÛúÒÜúÐÞúÌØúÅ×úÂÓúÅÑúÂÐöÃÐùÀÏöºÎñ¹ÉëµÃè°Áß¬¿Û¯»Ø¬·Ø«·Ú°¸Òª¶Ð§³Î¨³È ¯¼¬·ª¨¡wqf~nw]k[wb_zkWudUo[Woi[tlWwd]ul]q¥Â·¿Ò½ÊÑÅÒÒÄÑÕÁÓÕÄÔÒÁÖÕÄÖÖÂÔÔÃÕÕÀÙÓÂ×Ò¾ÑÓÂÕÔ¾ÒÓÃÓÒÁÓÐÄÓÒ¿ÕÐ¾ÓÒÀÓÌ½ÐÓÃÕÒ¿ÕÓÀÕÑÁÐÓ¿ÕÑ¿ÒÒ¿ÒÒ¾ÓÒ¾ÒÒÀÕÒ¿ÓÐ¿ÕÒ½ÏÑÁÑÑ»ÐÍ¾ÎÎ½ÒÐ¾ÒÎ¿ÐÏ¾ÐÐÀÒÎ»ÑÍ¿ÐÐ»ÑÌ¿ÓÏÁÍÐ»ÓÏºÑÍ»ÐÒ½ÐÎ½ÌÌ»ÎÍ¿ÒÐ½ÎÐ½ÏÎ¾ÐÏ¾ÐÎ¼ÐÍ»ÐÌ»ÐÉºÍÍºÐÌ»ÑÊ¹ÊÌ»ÏÊºÐÌ¹ÎË½ÊÌ»ËÌ»ÎÍ¹ÌÊºÎË¹ÌË¹ÊÊ»ÍÊ¹ËÈºÌÊ·ÌÊ»ËÈ·ÎÌ»ÌÈ¼ÌÈ¸ÍÇºËÊ·ÊÆ¸ÊÊ¶ÌÈ¹ÊÈ·ËÇ¹ÊÉ¸ÈÆ¹ÈÇµÉÈ¶ÎÈ¸ÌÆ·ÊÉµÊÈµÊÇ·ÊÈµÊÈ·ÊÇ¹ÌÆ·ÊÇ¶ÊÆ·ÉÉ´ËÊ¸ÊÆ·ÈË¶ËÆ´ËÇ´ÆÅ¸ÈÆ³ÉÆ¹ÊÈ´ÈÆ³ÆÅ·ÈÆ¶ÊÇ³ÈÄ³ÈÅµÈÃ³ÆÆµÈÄ·ÊÈµÆÆ·ÆÄ¹ÉÃ²ÉÃµÇÄµÅÂ³ÇÃ·ÃÂ³ÆÄ³ÇÅ´ÄÁ²ÂÆ¯ÃÁ±ÆÁ³ÆÃ³Ã¿±ÆÃ²ÃÁ°ÆÁ³ÄÁ´ÃÀ³ÇÁ²ÆÁ²ÃÆ·ÆÀ¯Ä¿²ÁÀ³Ä¿®ÃÀ¯ÃÁ³ÁÀ±ÃÂ³ÈÁ³ÂÁ±Å½¯ÃÀ³ÄÀ¶Ã¾°Ã¾°ÃÃ³Â¿°ÃÀ±Ä¿²¿¿°Á¾¯Á¿³Ã¾²Ä¿¯À¾³À¿­Ä½°¿À³Â¿¯ÁÀ¯À¼°Á¼¯Â¼¯Á¼¯¿¼¬À¿¯Á½¬¿¿®Á½¬¿»¬À¼¬À¾®¿¸ª¾»¯¾¹¨¼¹¬¾¹­¿¼«¾»®¾º¬¾º®¾¼­¾·«¾¸ª½°¦µµ§·¹¤¾»¨»¸§º¸©»º¤¾¸¦¼¸§¼¸§¿·§»º©»º©½¸¤»·©½·©¼¹©¾¸§»»¬¾¸©À¹ª¾¸¦¾»£¾¸«Àº¦¾»«Àº¦¾»©¾¹¨¾·§¿¿«¿½«¾·©¿»©¿½¥¾º«¾»¬Á»¦Á¸«¾¹«À»§¿¸¬Á¹ª¿¸¨½¼©Á»¬¼»«À½®ÁÀ¬Á½«Á¾¨Â»«ÀÁ±¿½ª¾¾°ÃÁ¯Ä¼®Á¾­Á¿«ÃÀ­ÁÁ­Ã½¬Á¾­Ã¼¬Á¼¬ÂÂ¬Á¾«Â¿°Ã¿®Ã¾°ÂÀ°ÂÀ²ÆÂ«ÂÁ®Ã¿°ÆÁ®ÄÁ¯ÄÀ®ÅÁ±ÃÀ®ÆÂ²ÅÃ¯ÆÀ¯ÃÂ®ÆÃ°Â¾®ÄÃ°ÇÃ¯Å¿®ÄÀ³ÅÀ®ÆÀ±ÆÁ³ÆÁ³ÈÀ®ÅÅ°ÇÃ¯ÇÃ²ÇÀ³ÆÆ±ÈÃ¯ÉÂµÆÃµÇÆ´ÄÀ²ÇÁ°ÄÁ²ÇÂ²ÆÃ°ÉÄ´ÆÇ±ÇÆµÈÃ°ÈÆ°ÇÅ±ÈÇ¯ÌÆ´ÇÃ³ÈÁ³ÌÆ°ÆÆ´ÈÄ²ÆÅ°ÊÆ´ËÂ°ÇÅ°ÉÅ³ÆÆ´ÌÊ³ÆÃ´ÈÅµÈÈ³ÎÆ³ÉÆ´ÉÅ³ÊÃ³ÈÃµÉÆ³ÇÃ³ÇÆ±ÌÄ¶ÌÄ´ÈÊ³ÌÇ³ËÄ¶ËÇ´ÊÄ³ÈÈ´ÈÈ¶ËÈµÍÊ³ÌËµËÉ·ÊÆ¶ÈÇ¶ÌÈ¶ËÌ·ÌÇ·ÊÈµËÈ·ÌÈ·ÊÆ¸ÎÈ¶ÎÊ·ÎÈ·ÊÊ³ÍÇ·ÌÈ¶ÎÌ·ÎÊ·ÌÉ·ÊÊµÎÊ³ÌÈ´ËÈµÎÌ¸ÍÈ¹ÌÌµÎË·ÍÊ·ÉÉ·ÍÌ·ÎÈ¸ÍË·ÊÊµÎÊºÌÊ·ËË¸ÎÈµÊÈ¸ÐÌ¶ÍË·ÉÈµÎÈ¶ÌÊ·ÎÌºÍÌ·ÎÉµÎÍºÌÎ¹ÏÈ·ÎÈ¸ÍË·ÍÌ¹ÎÉºÌÌµÎÊ»ÌË·ÐÍ·ÑÎºÑÌºÏÎ·ÏÏ·ÏÌ»ÏÍ¾ÎÎºÏÎ»ÐÎºÏÎ·ÐÍºÐÒ»ÒÌ»ÒÒ¼ÐÌ¾ÑÎ»ÒÒ·ÑÎ½ÐÐ»ÒÏ»ÓÏ¼ÐÒ¾ÒÏ¾ÐÐ»ÓÒ¿ÒÎºÎÎ¾ÒÒ¼ÑÎºÐÎ»ÏÎ¾ÐÍºÎÊµÈ·¡¸¢tbl]nY~kWwoUuo]|u[zb~bgrxz¡¨´¤¹¨Â­Ê³Ð©µÙ§ºß¬Áé·Çô¿ÎúÇÕúÈØúÐÛúÑÝúÓáúØâúÔãúØèúÛæúÛèúÜëúàîúáðúßîúáðúãñúæóúæöúçôúäõúåõúéøúè÷úèøúæöúåøúæ÷úæùúæ÷úçúúêùúëøúêúúèúúìúúìúúíúúîúúìúúóúúóúúñúúóúúùúúùúúøúúñúúòúúñúúòúúôúúõúúöúúõúúöúúúúúúúúùúúúúúúúúúúúúúúúúúúúúúúúúúúúúúúúúúúúúúúúúúúúúúúúúúúúúúúúúúúúúúúúúúúúúúúúôúúôúúøúúùúúöúú÷úúöúúñúúïúúïúúîúúëúúîúúëúúêùúìùúèùúéøúèöúæöúèöúäôúãöúãöúáôúßñúÞïúÜîúØíúÖëúØëúÕèúÒçúÒâúÓäúÐâúÏâúÒàúÐáúÎàúËÛúÊÚúÆÙúÈØúÊØúÈÙúÇÕú¿ÔúÁÎúÁÎø½Íö¾Îô½Èô»Êñ·Ãê³Âá¯¾ß§»Ùª·Ð¡µÒ£³Ó§²Ò¥³Î±Ç«Ã¬»¨³¡¨~qnbt[|t_ziQt`Io_SofQndOgYOk`QidMn`Uotd¹«´É¹ÅÐ½ÌÌ¾ÍÐ¾ÏÒ¾ÒÑ¼ÐÒ¾ÏÒ¼ÒÎ½ÏÎ¾ÎÐ½ÎÏ»ÐÑ»ÐËºÏÏ»ÎÎÀÑÐ»ÒÎ·ÌÌ¹ÐÎ»ÏÐ¹ÎÌ¿ÐÍ¸ÎÓ»ÏÎ»ÎÎ»ÌË¹ÎË»ÍÌ¾ÎÌºÑÌ¹ËÎ»ÎÉºÏË»ÏË»ËÏ¸ÐÊ·ÌÌºÎÊ»ÐÊ»ÎÊºÌÊ¸ÌÊ·ËÊºÌÊ¾ÌÊ¹ÊÈºÉÍ¹ÌÌ¹ÎÌ¶ËÎºÎÌ¹ÍÊ¸ÌÌ¸ËÊ·ÎÈ»ÊÊºÌÈ·ÊÊ·ÉÈ¸ËË´ÊÈºÊÃµÊÈµÌÄ¸ÊÈ·ÊÇ·ÊÇ¶ÊÈ·ÊÆ´ÊÇ¶ÅÈµÉÆ³ÈÆ´ËÆ³ÉÅ³ÈÇ³ÊÃ´ÆÃ°ÇÆ¶ÆÅ·ÈÆ³ÈÄ³ÈÈ´ÅÇ·ÈÇ¶ÆÃ³ÆÆ´ÈÈ²ÊÄ·ÆÃµÆÃ´ÆÆ³ÉÃ¶ÆÂ³ÇÃ²ÈÅ³ÄÃ­ÇÂ°ÆÂ³ÆÄ²ÆÃµÆÀ²ÄÄ´ÄÄ²ÆÁ±ÆÁ³ÅÃ³ÇÃ±ÃÃ°ÅÁ®ÆÃ´ÃÃµÆÃ°ÅÂ°ÇÁµÆÁ³ÃÃ°ÁÀ°ÃÂ¯ÃÂ²Ã½²Á¿¯Á¾­Æ¾®ÃÁ°ÃÁ¯ÄÁ­À¿°Ã¿­Á¾°ÁÁ²ÆÂ²ÃÀ¯Á¾­Ã¿­ÁÁ¬Ã¾¯¾¿«ÁÀ®Ã¾®Â½­¾¼ªÁ½¯Á¾¬Á½¯½¹®¾¾¬À½¨¿½®¾½®Á¾®¿¸®À¾¯Á¼ªÁ½­¾»¬¾¾¬Á»«»º°¾»©»»®Á¹«¾¾­½½«½½¯À»©Á»¬¾»¬¿¹®½º¬¾»¬¿½ª»»¬¾»¬¼º­¿¾¬½»«½¸¬½¸ª¿·¬¼¸«½º©»¸ª¼¹®»»§½¹ª½¸«½º§ºº§¾¹§»»¦»·§¹³¦·¶§º»£»¶©»¸©»µ§»µ¨º¹¨»·¡··¥¸¶¥¹·«º¿¨¼¾¬Á½¬Á»«Á½¬ÀÁ¬¾»ªÁ»¬À¾«À½¬¾¾®Â¼©Â»«À½«Â»©Á½¨À¾¯Á¿¬Â¼­¾º«Á½ªÀ¿¬Á¿¯ÂÁ¬ÅÂ­Â¾°ÂÁªÂ¾®À¾¬ÁÁ¯ÃÀ«Ä¾®Ã¿°ÂÂ«ÃÁ«Á½¬ÃÁ¬Å¾°ÂÂ¬ÃÁ¬Â¿¯¿Á®Á¾­ÃÀ®ÆÂ±ÇÁ°ÆÁ®ÂÃ³ÅÁ®ÅÅ®ÅÂ¯ÅÃ®ÇÃ±ÆÁ´ÈÂ­ÈÅ°ÆÄ³ÇÃ³ÈÁ±ÇÁ´ÈÁ°ÆÅ³ÆÁ°ÆÂ²ÅÅ³ÆÁ´ÆÆ³ÆÂ³ÈÂ´ÈÅ´ÈÅ±ÇÅ³ÄÄµÇÃ¶ÈÂ¯ÅÆ³ÇÅ³ÈÈ²ÈÆ³ÈÅ´ÉÄ³ÊÈ³ÈÄ³ÌÃ±ÇÆ³ÈÆ³ÈÄ³ÈÆ´ÈÆ·ÉÆ´ÌÃ´ÈÅµËÃ³ËÈµÉÈµÈÉ´ÈÇ¶ÊÆ¹ËÊ²ÌÆ·ÊÈ²ÈÆ´ÈÈ´ÊÅ·ÊÉ³ËÆ³ÊÉ·ÌÇµÌÊ¶ÊÈ·ËÊ¹ËÈ³ËÅ·ÊÊ·ÊÇµÎÈµÌÈ·ÌÈ·ÌÆ³ÈÈ¶ËÉ³ÍÊ´ËÈ¸ÎÊ·ÎÉµËÈ¸ÊÉ´ÎÌµÍÉ¸ÌÊ¶ÍÌ¹ÌÊµÊÊ·ÌÉ·ÒÉ¹ÌÆ·ÐÊ¸ÊÈ¶ÎÉ¶ÍÊ·ÊÆ·ÑÌ¶ÌÊ·ÌÈ·ÎÍ¹ÏÊ¶ÍÊ¸ÎÊ»ÐÊ·ÒÎ»ÎÌ·ÍÌ¹ÍÍ¶ÐÌ¸ÍÊ¼ÎÌ¸ÎÊ»ËÎ»ÐÌ¶ÒÌ¹ÐÏºÐÑ»ÐÎºÎÌºÑÏ»ÒÎ¾ÐÎ»ÒÎ¸ÑÎ»ÏÏ¹ÐÏ»ÐÍ·ÑÌ¾ÒÌºÒÍ»ÒÊ»ÎÎ»ÐÌºÒÐ½ÎÎ»ÒÐ¹ÒÌ½ÐÑºÑÎ»ÎÒ¼ÑÎÁÔÐ¹ÒÍ¾ÐÎ¼ÐÑºÖÍ»ÎÐ»ÑÐºÐÎ½ÐÐ¾ÎÎ»ÑÏ¼ÒÒ¼ÒÒ¼ÖÍºÒÌ»ÐÐ¼ÒÎ¼ÐÍºÏÒ¾ÕÐ¿ÑÏ½ÐÓ½ÙÑ¿ÓÐ¾ÓÑ¼ÕÔ¿ÓÒ¿ÔÒ½ÓÒ½ÒÒÁÓÒ¼ÒÓÀÕÕ¾ÓÒÃÙÓ¾ÖÕÃÖÓ¼ÒÕÀÔÕÂÓÐ¿×ÓÀÕÕ½ÕÒ¾ÓÒ½ÓÖ¾ÕÕÃÓÖÁÖÒ¿ÕÒÁÖÒ¾ÕÓ¾ÕÒ¿ÔÔÂÕÑ¾ÒÐºÌ½£¿¦ir`ubu`~u`zb~gnkq~¥°£µ¨»¨¿¯ÊµÏ »Ñ¦¹Ù¨Àä®Áí»ÍöÆÕúÆÙúÏÛúÒáúØãúÒáúÖæú×èúØéúÜèúÞíúàîúâïúæòúäòúçöúéôúèøúçøúíúúéùúëùúëúúëúúëúúëúúèøúìùúèúúçúúìúúíúúïúúëúúìúúïúúðúúòúúóúúðúúõúúõúúöúúöúúùúú÷úúõúúöúúøúúöúú÷úú÷úú÷úúúúúúúúúúúúúúúúúúúúúúúúúúúúúúúúúúúúúúúúúúúúúúúúúúúúúúúúúúúúúúúúúúúúúúúúúúúúúúúúúúúúúúúúúúúúúúúúúúúúúúúúøúúõúúóúúôúúòúúòúúðúúîúúðúúîúúðúúðúúïúúêúúçúúéùúëúúè÷úèøúçöúãöúãõúäñúÜòúÙðúØîúÙíú×êú×êúÒèúÐèúÓæúÕãúÒæúÏáúÐàúÎáúÊÛúÏÛúÍàúÎÛúËÙúÆÖúÄÓúÆÖúÃÔúÂÐúÃÐù¿Ðô»Ëð»Åí³Äæ°ÂÜ«¹×§·Ö¨¶Õ¬·Û«¶Ñ¦¶Ë¢±Å¡®Ã®¸¦° §zrnizf{qUzkUul[wi]wdYl_Yqi[qfStfYx{iÀ°¶Ï·ÊÕÁÎÓÀÑÒÀÒÕ»ÐÔÀÓÖÂÕØ¿ÔÒÁÔÓ¿ÒÒÁ×ÔÂÒÖÀÓÒÀÕÖ½ÓÐÁÕÓ¾ÕÐ¿ÑÐÀÏÕÁÒÒ»ÓÒÁÒÒÁÔÓ¿ÔÑ¿ÒÓ¾ÖÑ¾ÔÏ¾ÍÐ¾ÓÐºÐÐÁÐÒ¾ÒÐ½ÐÑ¾ÎÑÀÐÒ¼ÐÐ¼ÍÎ¾ÒÌ¿ÒÏ¿ÓÎÀÎÓ¾ÓÐ»ÐÏ¼ÐÎ¾ÑÑºÐÏ¼ÎÐ¼ÐÏ½ÑÏ½ÌÎ¿ÒÍ»ÍÏ¼ÏÌ»ÐÎ»ÒÊ»ÌÏ»ÌÊ¹ÐÏ¾ÐÊºÎËºÌÊ¹ËÊ¾ÍÎºÎÌ»ÐÌ»ÎÍ»ÎÌ¾ÐÊ»ÍÌºÎÊ¼ÎÊ»ÊÊ¸ÌÊ¼ÌÉºÌÈ¶ËÊ¶ÊÉ»ËÌ·ËË»ÌÈ¹ÈÍ¹ÌËºÌÉ¸ÈÇºËÊ¶ÍË¸ÉÆ¸ËÉ·ÍÈµÊÈ·ÇË»ÌÈ´ÈÇºËÊ¹ÌÇ¶ËÄ·ÆÇ¶ÈË»ÈÉ·ÊÉ¶ÈÊ¹ÊÆ¸ÈÈ·ÊÈ³ÉÆ¶ÇÈ¶ËÉµÈÅ³ÈÄºÊÈ³ÈÆ¸ÉÈµÈÅµÈÅ³ËÁ·ÆÊ´ÈÇ¶ÊÄ±ÆÆ¶ÄÄ³ÉÃ³ÆÅ¶ÆÃ±ÆÃ¸ÆÅ²ÈÀ³ÄÃ±ÃÃ´ÆÂ²ÅÂ³ÆÅ´ÇÃ´ÃÅµÆÃ·ÄÂ±ÆÃ³ÆÀ´ÆÃ³ÅÁ¯ÆÃ°ÅÄ´ÃÃ¯ÅÁ³ÆÃ²ÃÂ³ÂÀ´ÅÃ³Ä¿°ÅÅ²ÅÂ°ÄÁ¬Ã¾±ÃÁ¯ÃÃ®Ã½´Æ¾®ÃÃ±ÄÁ³Á¼®ÁÀ¯Ã¾®Ã¿¬Â¾³ÁÀ±ÃÁ²ÂÁ±ÃÁ³ÂÂ°ÃÃ±ÂÁ³Å¿±ÀÁ®¿¿±Â¾¯¿¾¯ÄÂ¯Ã¼±Á¾²À¾¬À¼°¾¾­Á¼«Á¼®¾¾²À¾¬À½¬ÀÀ¯¾À¬Áº±¾»­¾¼ªÁ¹¨¾·¨¿¼«¿»¬¼»­»º¬¿¼¨½»­¿»¬¾»ªÁ»­»¸ª¿±¤¶¸¥¸·§¼»¦½»§¼·¨½»§¼·¥¾¸©»¹¥¾¸§½·«»·¦¾·£¼º§»¸£¾·«»·©»·§¾º¦¹º«¼¸©»¸¬¿º¨¾»©¿»¨¾»¨Àº«¾º«¾¹¨¾»©¿¼¬À¶¬¾·©¾»«À»¨½º©¾º«Á¸ª¾»­Á»«Á¾©Ä¸¬¾½®¾¾¦¾¼ª¾½«Á½«À½¬Ã¾©¾½®¾¾¬Ã¼¬Á¾¬¿¼©Á¾®Â¾¬Á¾®Ã¿ªÄ¿¬ÄÀ®ÀÀ®ÅÁ®ÁÂ«Ä¿±Ã¼®Ã½«ÁÁ°ÄÃ«Á¿®Â¿­ÃÁ¯Ä¾©ÅÀ®ÁÃ°ÄÁ¯ÂÀ¯Á¾°È¿¬ÄÃ®Á¾°ÂÄ¯ÃÃ­ÂÄ°ÄÁ¬Æ½²ÅÃ±ÅÁ¬ÆÁ­ÆÁ³ÄÁ®ÆÂ­Ä¿³ÄÁ²ÊÂ®ÆÄ²ÆÂ³ÈÁ°ÆÂ°ÆÇ·ÆÃ³ÈÄ±ÆÃ³ÈÃ°ÇÄ±ÅÄ²ÅÄ±ÇÅµÅÄ°ÆÃ²ÈÁ³ÉÄ²ÈÆ²ÊÄ¯ÅÂ±ÆÄµÊÆ³ËÂ¯ÆÆ²ÈÅ°ÈÁ¯ÇÃ°ÇÄ¯ÊÂ²ÅÄ´ÇÄ±ÉÃ°ÆÇµÈÃ°ÈÆµÈÆ²ÊÈ´ÊÅµÈÈµËÆµÌÇ³ËÆ³ÈÇ³ÊÄ±ÉÈ°ÇÄ¶ËÈ´ÈÅ·ÊÇ²ÉÇ°ÊÇ²ÉÇ´ÌÈµÌÇ·ÊÅ·ÌÇ¶ÉÈ·ÊÂ·ËË³ÍÅ³ËÉ·ÌÉ³ÌÈ¶ÉÈ·ÊÊ¸ÍÇµÌÃµÌÊ¹ÌÊ·ÏÈºÊÊ³ÌÈ¶ÎËµÍË·ÎÊ¶ÏÇµÌÈµËÉµÌÈ¶ÌÇ³ÌË·ÎÈµÌÊ´ÊÆ·ÏÊ¸ËÊ·ÍÈ·ÎË·ÌÉ¹ÍÈºÌÉ·ÎÉµÎË·ÎÌµÍÍ¸ÎÉ·ÏÊ¹ÏËµÍÌ·ÎË·ÐÊ·ÐË½ÏË¹ÎÌ»ÒÌ»ËÍºÐÇ·ÏÎ¹ÎÏºÒÈ·ÌÊ»ÎË¸ÏË´ÍÊ»ÎËºÌÎ·ÐÊ»ÐÐ¾ÎÌ·ÎË»ÐÑ»ÑÐºÑÐ»ÎÍ»ÐÎ»ÒÌ»ÏÒ½ÐÎ¶ÐÎ½ÑÐ»ÐÎ½ÑÎ»ÐÎ½ÒÐ½ÒÐ¾ÑÎ»ÒÑ¾ÔÏ¾ÐÎ¿ÏÐ¾ÓÓ¾ÒÎ¸ÐÎ»ÐÏ»ÐÏ¾ÐÐºÍÇ´Ä¸¡·£zfo`|kYzoWqnUzo]zx_|b~goo|¤°³ »ª¾¬È¯Æ ³Ï ¶Ð§»á®ÀæµÆö¾ÌùÃÖúÊÙúÎÚúÏàúÕáúÓàú×âúØâúØæúÙäúÝèúÞêúàïúáðúãòúæóúæôúãöúäöúçøúä÷úèöúäõúæ÷úãøúãöúåùúäøúæùúãùúãúúèúúæúúéùúëúúîúúêúúîúúîúúïúúïúúñúúôúúöúúôúúðúúðúúôúúõúúõúúöúúõúú÷úú÷úúöúúúúúúúúúúúúúúúúúúúúúúúúúúúúúúúúúúúúúúúúúúúúúúúúúúúúúúúúúúúúúúúúúúúúúúúúúúúúúúúúúúúúúúúúúúúúõúúòúúðúúðúúðúúïúúïúúëúúìúúéúúëúúëúúéøúèúúå÷úäöúäôúãôúæ÷úâôúáóúàòúáñúàñúÛïúÕìúÓêúÕæúÖéúÕæúÐãúÐáúÎÞúÎÝúÎàúÍÝúÍÜúÌÛúÆØúÈ×úÈÙúÈØúÆ×úÃ×ú¾ÒúÂÎùÀÌ÷½Îô¼Ìô¸Éñ¸Çî³Ææ®Àà©½Þ§µÒ¥¶Ð°Ï¢²Ôª²Î¥²È¯Á¬¼¤·£«¦wkziu_qYxlUtiOqdSk`QlfOn`Of_UldMkdQrg`|¼«µÊ·ÆÎ¼ÊÎºÏÓ¿ÏÎ¾ÒÐ½ÑÏ¾ÎÏ»ÓÐ»ÐÐºÎÐ¾ÒÏºÏÍ¼ÐÏ»ÏÐ¸ÎÎ»ÎÎ¾ÏÎ»ÍË»ÏÎ»ÎÏ»ÏÎºÏÎ»ÍÏ¼ÐÌºÎÍ¼ÎÎ¹ÐË¼ÐÊ¼ÌÎ»ÊÎºÎÍ»ÏÎ¼ÎÌ»ÏÍ¹ËÍºÌÐ»ÐËºÎÌºÍÎºÎË¸ËÌºÌÊ·ÌÌ»ÍÌ¸ÊË¹ÌÊ»ÌÊ·ÊË»ÏÌ·ÎË·ÊÈ¸ÌÌ·ÎÈºÊÈ¸ÊÊ·ÊÈºËÊ¸ÌÊ´ÌÆ·ÊÌ·ÊÉ·ÈÇ¸ÉËµÌÊ·ÌÇ·ÈÈ¶ËÈ·ÊÃµÈÆ¸ÈÈ·ÌÈ³ÈÈ·ÉÆ¶ÍÇ¸ÊÇ·ÇÆ¶ÆÈµÈÄ³ÆÅ³ÈÆ³ÈÇ´ÄÅ³ÆÈ³ËÄ´ÅÆ²ÊÇ³ÇÄ²ÆÆ·ÈÆ³ÇÃ´ÇÇ·ÅÃ·ÇÃ´ÈÄ³ÆÃ·ÆÆ³ÆÄ³ÆÆ²ÅÆ±ÇÀ³ÅÅ²ÆÃ°ÅÁ³ÃÃ±Ç¿°ÆÃ³ÄÂ³ÈÂ³ÆÃ°ÃÃ­ÅÃ·ÇÂ³ÅÂ¯ÄÁ®ÆÁ±ÁÁ¶ÄÂ´ÃÂ±ÃÁ³ÃÀ¯ÇÁ°Á¿°ÆÁ±Ã¾®Ã¾¯Ã¼¯ÀÃ°ÄÁ±ÁÀ®ÂÁ±¿Á®Ã¿°Ã¾°Á¾°Ã¾°Á¾¬Á¾­ÃÀ­Ã½®À¾¬À¾°Á¼«¾»²Á»®Ã½­Á¿«Á¾°Á½±Á¾¬¿»¬¾¾®Á¾ª¾»¬Á»¬À½«Á¾°Âº¬½¿­¼¾¬»º¬¾¼«¾»¬¾¼®À¾«½»«»¼¬Á¿­¾º­¾º¬»»¬¿»§¾»­¾»­¼¹®½¼­¿»§»¹¬¾ºª»»«À¼¬À·ª»º«¼¹©»º«½»¬»º«»»ª»¸®¼·¨¸µ«··©¾µ§»·¥¼¸§¾»«¸·§¹µ¨¹¶§½·¦»µ¦¸¶ª»·§¼¹©º·©»½ª¼¾­À¾­¾¿ªÀ»«¿¼¬ÁÀ©Á»¬¾À¬Â½©½¾¬Áº«Â¾ª¿¾­Á»¨ÁÀ°Â¾­¿À«Á¼©¾»¬ÂÀ¬ÁÁ«Â¾¬Â¿«ÀÀ­Ä¿«ÀÁ¯Â¿¬ÆÀ¬Á¿¬Â¿¯Å½­ÃÂ®ÅÃ¬Ç½®Á¾«ÄÁ¬ÃÁ°ÃÀ­ÂÁ±ÄÀ¬ÄÁ°ÃÂ­ÅÀ¬¿Â¯ÅÀ­ÇÁ³ÃÁ¯ÅÂ°ÄÂ®ÆÀ³ÄÄ°ÅÂ­ÆÃ´ÈÃ³ÄÃ°ÈÆ¯ÆÃ°ÆÁ²ÅÃ³ÅÀ¯ÅÆ¯ÆÇ¶ÆÀ¯ÆÃ°ÅÅ²ÇÃ±ÈÃ³ÇÄ³ÆÄ±ÆÅ´ÊÆ­ÊÅ¶ÅÇ³ÈÅ¯ÈÄ³ÅÆ²ÈÆ²ÊÆ³ÈÅ³ÆÇ²ËÅ´ÇÃµÆÅ³ÈÅ³ÉÊ°ÆÇ³ÉÅ±ÈÈ´ÈÆ³ËÇ²ÊÃ³ÆÇ³ÈÆ²ÉÅ³ÉÈ´ÌÈµÉÈ´ËÆ·ÉÊµÉË·ÈÇµËÈ´ËÆ¶ÊÈ´ÉÈ¶ÊÇ´ÉÅ²ÊÈ´ÌÊµÊÈ¶ËÈ´ÌÊ¶ÍÈ·ÊÈ¶ÍÆ´ÊÈ¶ÏÉ·ËÆ¶ÌÃ·ËÊ²ÌÈ¶ÏÈ·ÊÊ³ÌÉ»ÐË·ÎÊ³ÎÈ¶ÎÉ·ÎÍ·ÏË·ÐË·ÎÌºÌÌ·ÐÊµÌÈ¸ÌÉºÉÉµÎË¹ÊÌ¸ÐË¸ÏÈ»ÎÊµËÉ³ÍÊ¸ÍÌ¹ÎÌ·ÊÊ¹ÎÌ¹ÎÌºÎÉ¹ÎÈºÎÎ·ÒË¹ÏÌ¸ÐÌºÏÌ»ÌÊ»ÎÏ¹ÏÎ»ÐÎ¼ÒÏ»ÍÐ¹ÐÏ¼ÑÎ¹ÐÑºÕÍ½ÏÎ»ÍÎ·ÌÏºÐÎ¼ÐÌ·ÐÎ¼ÐÍ¹ÒÎ¹ÑÍ¸ÒÌ¶ÒÍ¹ÒÐ»ÑÐºÐÌºÏÎºÒÎ»ÒÏºÓÐ»ÒÐ»ÒÐ»ÒÐºÒÏ»ÐÐ·ÒÎºÒÌ¹ÒÏ¿ÒÑ½ÒÐ¹ÖÑ¿ÒÑ»ÐÒ¼ÓÒ»ÓÏ½ÒÑ½ÒÒ¼ÒÏ·ÓÎ¾ÕÐ¾ÕÒ¼ÒÐ½ÏÎ¾ÒÓ¼ÑÒ¾ÔÍ¼ÕÓ¾ÒÒ¿ÖÒÁÓÓ¾ÑÐ½ÕÒ¾ÕÒ¼ÕÓ¿ÕÐ½ÕÓÁÓÖ¾ÕÓÀÓÑÂÕÕ¿ÕÒÁÔÑ¾Ò×¼ÓÕÃÖÕÁØÔÁ×Õ¼ÕÕÁÖÖ½ÒÒÀÖÕ¿ÕØ¿ÔÒ¾ÕÓ¾ÓÓ½ÑÎ»Í¹¤»£nzdq]o[{wY|z`gkruw®³¥¸¨½«Ã°È ´Ï¹Ò¢¹Õ¬½ê¶Åï¸ËõÁÐúÈÖúÐÜúÑàúÓâúÖæúÚäúÙçúØèúÙéúÛéúßíúßñúãôúãóúçõúçöúè÷úéùúíúúéúúêúúëúúçùúèöúçøúçùúéúúéúúäúúçúúíúúìúúìúúïúúïúúðúúðúúðúúòúúðúúñúúõúúöúúùúú÷úúõúúøúúõúúõúúøúúøúúúúúöúúúúúúúúúúúúúúúúúúúúúúúúúúúúúúúúúúúúúúúúúúúúúúúúúúúúúúúúúúúúúúúúúúúúúúúúúúúúúúúúúúúúúúúúúúúúúúúúúúúúúõúúôúúòúúôúúóúúôúúñúúïúúìúúëúúíúúïúúìúúíøúèúúè÷úé÷úêøúç÷úæöúèöúáöúãñúßñúØïúØìúØíúÝíúØìúÖéúÕçúÒäúÓåúÓâúÐâúÑáúÐàúÊáúËÝúÉßúÉÙúÈÛúÈØúÈ×úÆÒúÂÒúÀÐú¾Ïø¾Ìö¼Éò·Èì·Åé¯Âàª½Ö«¸Ü¦¹Õ©·Ó«³Õ¥¶Ë¦±Ê ²¼«·¨µ¤«¡¡tnbz`|l_{u[wk[ul[ufQo]SodUtkUui[|uiÃ²ºÎ¹ÆÖ¿ÎÔ½ÒÒÂÒÔÂÓÕÁÔÒÁÕÕ¿ÖÓ¿ÖÒ¾ÓÕ¿ÓÕ¾ÓÓ¾ÕÒ¿ÖÔ¾ØÑ¾ÐÒ¿ÒÕ¼ÕÒ¼ÑÒÀÐÕ¾ÓÒÀÓÒÁÏÑ½ÖÒ¿Ò×ÁÓÓ½ÖÑ»ÒÏ¾ÒÕ¾ÑÑÁÓÑ¾ÐÎÁÑÒ¾ÓÏ½ÎÒ¼ÐÒÀÐÐ½ÐÐ¾ÒÌºÐÎ½ÐÐ¾ÒÏ½ÕÒ¾ÐÏ»ÐÐ¾ÐÌ»ÏÎ¹ÒÎºÌÒ¾ÎÌ¹ÏÍºÐÏºÎÍºÐÏ»ÌÏ»ÎÊ¸ÌÎ»ÍÎ»ÐÉ»ÍË¸ËÍ¹ÎÊ»ÍË¶ÎÌ·ÍÌ¼ÎÊ½ÍÌ»ËÌ¼ÎÍ»ÎÏ¹ÎÊ¹ËÌ¶ÌÉ·ËÍ¹ÊÉºÎÌ·ÊÊ·ÌÆµÊË·ÊÊ¸ÊË·ÊÈ¹ÌË¶ÌÈ·ËÊ»ÊÍ¹ÉÈµÊÈ·ÌË·ÊÈ·ÉÌµÉÉ¸ÆË¹ÉÈ¶ÈÈ¸ÌÊ³ÆÈºÌÊ¸ÊÈ¶ÈÆ¶ÊÈ¶ÉÃ³ÊÆµÈÇ¶ËÄµÊËµÇÈ·ËÇ²ÉÅ²ÇÈ´ÈÆ³ÈÆ¸ÈÇµÊÊ³ÈÆ¶ÇÅ·ÊÇ¶ÈÅ°ÊÃ·ÇÅ°ÉÆ³ÉÇ³ÈÆ±ÃÂ±ÅÇ³ÃÄ±ÇÄµÆÁµÂÆ³ÆÅ²ÄÁ²ÆÃ±ÈÆ²ÅÃ³ÅÅ³ÅÅ³È¿³ÃÆ´ÄÁ°ÃÁ¯ÁÅ°ÅÁ³ÃÀ­Ã¿³ÄÁ±ÅÂ²ÄÃ³ÃÁ°ÂÁ²Ã¾°ÁÁ¬ÆÂ²ÂÁ±Á½­ÂÀ¯Á¾³Á¿³ÂÁ®Ã¾¯ÂÁ®ÁÁ­Á¿®¿¿®ÂÀ¬ÃÁ°¿À²Á¿¯ÆÀ°ÁÁ²ÃÁ°Â¿ª½¿°ÂÂ±Á¾²Á¾­ÀÁ­ÁÀ°ÁÁ®ÁÀ¬ÁÀ¯Á»®À½«Á½®¿¾©ÁÀ«À¼¬Á¼¯¾¾¬Ä¾«¼º¬¿¿ª¾»¨¼¼¬¿¼¬Á»¬¾½¬Á¼¬¾»¨¿·¨Àºª½ºª»½¦¿»ª»²§µµ¦»¸§»¸§¾¹§»º§¹º«¿·¦½µ¨º»£»¸¥¹¹¨¼º§¼·¦»·¢¿¸©½¼§¾´§»¹ª½¼¦Á»§»»©»»©¾¹§Á·ª¿»§¾º«¿»¦¾»ª¿¸¦¾¸¨Á½«¿º¨¾¹©¾º¤À»ªÁ»«¾¹©¿º«¿¾«¾¹«¾½ªÁ½ª¾¿«¾»ªÀ½«À½¯¾¾©Ã¾¬Á»ªÀ¾®Âº­Á½¬Ã¼¬ÁÀ©ÀÀ­Â»®ÃÁªÃ¾®ÁÀ¯ÃÁ«Ä¼®Á¾¬À¿«Á¾®ÅÀ®ÂÀ¬Ã¿¬Á½«Ã¾­ÃÀ¬Ã¾¬ÆÃ±ÃÁ®Ã¾±ÇÃ®Æ¾­Ä½­ÃÁ­Â¿­ÆÀ°ÃÁ®ÆÁ°ÅÃ®ÇÁ®Æ¾¯Æ¾®ÄÂ®ÃÁ¬ÅÁ°Ã¾µÆÄ°ÆÀ¯ÅÁ²ÃÃ±ÅÈ¯ÊÃ³ÆÅ²ÆÃ²ÆÂ²ÆÃ³ÄÆ²ÆÃ³ÆÂ²ÆÃ®ÅÃ¯ÆÄ²ÆÆ³ÇÃ³ÆÃ²ÇÄ±ÆÆ¯ÄÄ³ÈÈ°ÈÅ±ÃÄ°ÈÁ°ÇÃ²ÈÃ²ÉÅ³ËÅ²ÇÃ®ÈÃ±ÄÃ³ÉÃ°ÈÆ²ÆÆ²ÉÃ´ÇÆ²ÉÃ°ÄÅ³ÊÇ´ÈÊ³ÌÅ²ÇÈ³ËÆ³ÊÆ²ÊÊ´ÌÅ²ËÅµÈÇ´ÊÈ³ÌÇµÊÆ´ÈÈ¶ÌÉ´ÊÄµÉÇ´ÊÈ³ÊÉ¶ÉÉµËÇ´ËÈ³ÊÇ´ÌÈµÌÆ³ÌÈ¸ÎÈµÊÆµËÊ´ÍÊ¶ÌÈ·ÊË·ËÈ·ÍÇ·ËÈµÐÊ·ËÍ·ÌÉ¶ÎÈµÍÇ´ÏÉ·ÌÊ´ËÈ·ÏÈ³ÎÌ·ÌÊ¸ÎÈµÊÈµÊÉ·ÌÉ³ÌÊ³ÉÊ¶ÌË¸ÌÇ·ÎÊµÊÇµÌË¸ÎÉ¶ÍÊ¹ÎÊ¸ÌÎ¹ÏÊ¼ÌÉ·ÍÊ·ÏÎ¹ÏÍ»ÌÊ·ÌÌºÐËºÏÌºÐÈ·ÎÌ¹ÐÎ¸ÑË¹ÎË¶ÌÊ»ÎÌ»ÎÌºÎÊ»ÒÌ»ÐÌ¹ÌÎµÐÍ»ÍÌ»ÐÎ»ÑÎºÎÐºÎÎ¹ÏÏºÏÎ¹ÐË»ÏÐ»ÐÏ¾ÑÊ»ÏÐ¼ÏÎ·ÐÏ»ÓÑ¹ÐÏ»ÎÏ½ÒÒ½ÔÑ½ÑÑ¼ÓÎ»ÒÏ·ÒÎ¾ÐÐ¼ÓÐ½ÏÎ»ÐÐ¾ÌÁªÂ«¯{|dn]gUzl[tqY{q[{z_ggnq¡|ª§ ¬ ½©À¬Ç²Ë³Ì¸Ù¦¼â²Ãé²Çë»Ì÷ÃÑúÄÕúÌÙúÐÜúÒßúÒáúÔáúÔáúÕäúÙæúÚëúÙíúáïúâñúäôúäõúçöúãõúèöúåöúæõúä÷úä÷úâöúâõúâöúçøúäùúäùúä÷úãúúéùúìúúéúúìúúíúúîúúêúúîúúîúúñúúïúúóúúöúúöúúõúúòúúòúúòúúöúúöúúöúúøúú÷úúúúúúúúúúúúúúúúúúúúúúúúúúúúúúúúúúúúúúúúúúúúúúúúúúúúúúúúúúúúúúúúúúúúúúúúúúúúúúúúúúúöúúøúúúúúúúúùúú÷úúõúúñúúðúúëúúñúúòúúìúúèúúêùúêúúêúúêúúèúúçùúäøúáóúáõúäôúàóúßïúÜñúßðúÖîúÕíúÔëúÖåúÓæúÕæúÒèúÒâúÑâúÑàúÏáúÐàúËÜúÍÜúÆÛúÅØúÉ×úÆÖúÄÔúÆÖúÃÑúÀÎú½Ðú¼Ïø»Íö¾Éõ»Êô»Çé´Ãä¬½Ûª¶Ó£²Ð¦´Ì¯Ë²Ê£¬È²À©»¥µ¥©£znnugr]{k]tnStfUlfSl_On`Ig]Ol`UodWrufÁª·Ê¸ÅÔ¼ÌÒ¿ÐÏÀÐÑ»ÐÑ¾ÎÒ½ÒÏ½ÑÏ»ÒÏ½ÐÌ¾ÑÑ»ÒÐºÐÌ¼ÑÒ¿ÐÑ»ÐÐ»ÏÎ»ÐÍºÎÌ»ÎÐ¼ÏÒºÎÎ¾ÏÌ½ÎÐ¸ÐÎ»ÎÎ½ÐÌ»ÐÌºÌÏ»ÍÊ¸ÏË¾ÎÎ¹ÎÌ¹ÊÌ¶ÎÊºÍÌºÎÌ½ÎÈ¹ËËºÏÊ·ÌÊ·ÉÌ¸ÊÎ·ÌÌ·ÊÌ¸ÌË¹ÊËµÊË¹ÊÊµÌÈ¸ËÌ¸ÊË´ÊÈ¸ÊÊ·ËË·ÊÈ¶ÊÆ¸ÌÈ·ÊÈ¶ÊÈµËÉ¶ÊÉ¸ÈÈ·ÊÈºÊÈ´ÉÇ´ÊÈ·ÊÇ³ÌÆ´ÆÈµÊÊ¹ÎÇ·ÈÉ²ÆÈ°ÇÈ·ÈÉ·ÊÆ²ÉÃ³ÄÇ·ÈÇ³ÈÅ³ÈÃ±ÇÉ´ÊÅµÉÆµÇÆµÈÆ³ÇÆ²ÇÄ³ÊÇµÈÇ´ÆÄ´ÆÄ²ÆÅ³ÄÃ¶ÅÆ³ÆÂ³ÆÄ³ÆÆ´ÃÃ°ÃÅ²Æ¿±ÃÄµÃÅ°ÄÀ¯ÆÃ³ÅÁ¯ÃÁ³ÃÁ°ÆÃ²ÄÂµÈÀ²ÃÂ±ÃÁ°ÃÃ¯ÄÁ²ÃÁ°ÃÃ¯ÄÁ³ÂÀ®ÆÀ³ÂÁ²ÂÀ²ÃÁ±ÅÀ®Ã¾­¾Â°Ã¾®À¾¯ÃÁ°Ä¿³ÃÀ°Á¿¯Á¾ªÁÁ±Á½¯Ä»®Á¿®ÀÁ°Ã¿¯Ã¾¬Á¾±¿»­Á¾®Á¾®Ã½«Ã»¬¾¾«Á¼®Á¼©¼»¯Â¹¬Á½©¼»­¿»ªÀ»ª¾¾¬¾¾¬À»­¾¼¬½ºªÀ»¬½¼¬Áº«¾¼­¾·­¾¼«À½¬¿º¬½»¬¾½ª¼»¦º»¬¾¼¬¼»«Á»¬¾º©¾¹¬¾·¨¼º¤¾º¬¼·«¹»©½»¬¾·¬½»ª»¼©¸¶ª¾»ª»¶§¼·©ºµ©º·£¸µ¥¸¸§¹·¥º¸¥¸µ§»¸¦»³¨º¶§º·¥¹µ©½´§»»ªÁ»ª¿¼ªÁ¿¬Ã¿¯Á¾¬Á»¨À½«¾¾ªÀ¿©À¾®Á½ª¿¿¬Â»©ÁºªÂ»¬Á¾¬ÁÁ¬¿¼ªÂ½®Ã¼¯ÁÀ¯Ã¿¬Á¾¬ÅÀ¬Ã¿­Á½¬ÂÀ­Â¾¨È¿¬Ã¾­Ã¿¬Á¿¬ÅÀ¬ÆÂ­ÃÁ°ÅÂ­ÅÁ­ÃÁ¬Â¾«ÃÁ­ÃÃ¯ÆÂªÅÁ¯ÃÂ¬ÃÂ¯Â¿­ÃÁ®ÅÁ²ÆÅ¬ÆÃ¯ÅÀ®ÄÂ³ÄÃ²ÇÃ¯Ê¾¯ÇÄ²ÆÃ²ÇÃ¯ÊÅ±ÅÁ²ÉÅ¯ÅÃ®ÈÃ±ÇÆ³ÈÁ«ÆÅ°ÆÃ¯ÇÂ¯ÈÅ³ÆÃ³ÈÅ³ÅÄ­ÈÃ²ÌÆ³ÈÂ±ÇÇ³ÇÈ±ÆÅ°ÈÆ°ÄÆ±ÈÄ¯ÌÂµÇÆ³ÌÉ³ËÆ´ÊÈ³ÊÆ³ÊÈ³ÉÆ·ÍÈ´ÉÆ´ÊÈ³ÊÅ´ÊÊ´ÊÅµÊÊ³ÌÊ³ÊÉ´ÉÆ´ËÈ¶ÉÈ·ÌÈ¶ËÊ¶ËÈ¶ÉË·ËÉ³ËÈ³ÈÆ³ÌÊ³ÌÈµÊË¶ÌË·ÎË·ÎÊ²ÉÇ³ËÇ·ÌÇ·ÌÊ³ÌÈµËÆµÊËµÐÊ·ÍÊ¶ÍÉ·ÎÌ¶ÎÌ²ÌÈ³ÎÌµÐÌ·ÎÈ´ÍÌ³ÎÎ·ÉÌ¸ÎË´ÎÊ¸ÐË¹ÐÊ·ÐÇ¹ÐÌ¶ËÍ¸ÐÏ¶ÌÌ¸ÎË»ÏÊ¶ÎÈ¹ÎÍºÑË·ÏÍ¼ÒÌ»ÒÌ¹ÐÌ»ÏÎ¹ÐÎ¹ÏÍ»ÐÎ»ÔÐ¸ÐÌ¹ÐÎ»ÎÐ¹ÐÌ»ÎÐ¹ÓÐºÒÌ»ÎÏ¼ÑÐ¼ÏËºÒÌ¹ÓÍºÏÍ·ÑÌ¼ÐÌµÒÎ¹ÎÎ»ÍÌ»ÑÎ·ÒÍ»ÒÐºÓÎ¸ÒÌºÎÎºÒÎ¹ÒÊ·ÓÏ»ÓÐ¼ÒÍ»ÒÎ»ÐÐºÓÐ¾ÒÒ¸ÒÏºÒÎ·ÎÐ»ÓÓ»ÓÒ»ÐÐºÓÒ»ÓÎ¿ÕÎ¾ÑÒ½ÒÎºÒÓ»ÓÐ¼ÓÎ½ÒÐ»ÓÒ¹ÓÏ¼ÒÒ»ÔÐºÕÓ½ÓÐ¿ÕÐ»ÓÒ·ÐÒ¸ÖÓ¿ÓÕ¾ÖÓºÔÓÅÕÓ»ÕÒ¿ÕÑ¾ÕÑ¿ÔÔ»ÕÐ¾ÕÒ¼ÕÕ¾ÕÓ¿ÖÒ½ÐÓ¿ÔÕ¿ÕÒÀÖÔ½ÔÔ¿ØÔÀÖÓ»ÕÓÁÓÓÀÕÒ¾ÕÓ¾ÒÓ½ÐÊ¯Ãµ·iu]o[u]w_|fgktuzª­¯¦¹©Æ¬Ê³Ê·Ê¸Î¢»Úª¾â¯Æè¶Èï»ÌöÅÕúÈØúÎÝúÒÞúÒãúØãúÙæúÖèúÙéúÜìúÝïúâïúãòúäõúåöúä÷úê÷úéøúìùúæùúåúúé÷úèùúãùúçùúçùúëúúêúúéúúäúúìúúîúúîúúïúúëúúîúúíúúñúúòúúïúúñúúñúúóúúøúúöúúúúúõúúõúúôúúøúúúúúöúúöúúùúúúúúúúúúúúúúúúúúúúúúúúúúúúúúúúúúúúúúúúúúúúúúúúúúúúúúúúúúúúúúúúúúúúúúúúúúúúúúúúúúúúúúúúúúùúúøúúùúú÷úúöúúóúúñúúòúúñúúíúúïúúîúúëúúìúúïúúíúúëúúêúúéùúæøúäöúæøúäöúäöúãõúÝôúÝñúÜñúÕîú×ëúÖìúÕëúÖêúÓèúÒêúÕæúÓçúÐåúÑãúÓáúÌßúËàúËÜúÊÜúÈÙúÆÛúÆÖúÁÕúÁÒúÁÒúÁÒúÁÐö¼Îô¾Éð·Çì¸Åá¬½Ù§¹Ó¥¶Ñ¡³Í¤±Ì£³Ê³Æ­¾®º«¶£« ¤wrtgw_{x`zr]oYugUrgSodMr_Qud]xnW~~o¡¥Â°½Í¿ÊÕÁÒÓÁÓÕÁÖÓÃÕÖÀÕÔÁÕÓÂÖÓ¿ÕÓÀÓÕÃÕÕÃÖÒ¾ÒÖ¿ÔÕÃØÔ¼ÔÒÀÐÑ¾ÖÐÁÕÓ¾ÓÓÀÓÓ¼ÒÒÂÔÒÂÒÔ¼ÓÒ¿ÕÓÁÒÒ¼ÒÏ½ÒÒ¿ÖÐ»ÑÒ»ÐÍ¿ÒÒ»ÕÏ¼ÑÐºÎÑ»ÓÐ¼ÐÐ¼ÎÎ»ÒÐºÐÐ½ÒÐ»ÕÎ¼ÒÎºÍÎ¼ÏÐ»ÒÐ»ÐÎ»ÏÏ¹ÎÏ»ÎÌºÎÌ¹ÑÌºÐÍ»ÏÌ¸ÒÌºÍÎ»ÍÎ¼ÒÌ»ÐË·ÎÍ¹ÒÎ»ÎÌºÏÊºÏÎ¹ÓÌ¹ÍÌ·ÐÊ¶ÎÐ¸ÎË¸ÌËºÎÌ·ËÎ¹ÏÌ¶ÐÊ¶ÌÉºÍÊ·ÎÈ·ÌË·ÌÊ¹ÊÈµËÈºÌÊ¶ÍÇµÊË¶ÍË·ÈÆ³ËÈ¸ËÌ¸ÌÈ¶ÌÈµÊÊµÍÉ¶ÉÇ¸ÌÆµÊÊ´ÊÈ¸ÈÆµÈÆ¸ÌÆ°ÊÈ·ÈÊ´ÉÈ·ÈÇ³ÃÅ¶ÎÇ³ÈÄµÈÆµÈË³ÊÆµÊÉ³ÉÃ³ÈÇ¶ÆÅ´ÉÇ³ÈÇ´ÇÆ´ÈÂ³ÆÅ¶ÆÆ³ÈÅ´ÈÇ´ÆÃ²ÊÆ°ÇÆ²ÈÆ²ÉÇ¯ÆÅ³ÆÃ±ÊÆ´ÈÂ³ÇÄ°ÅÄ³ÉÅ³ÅÂ³ÆÁ³ÆÃ¯ÅÂ°ÆÂ²ÂÁ²ÃÄ±ÇÄ®Ã¾®ÇÁ¬ÁÂ³ÄÂ²Æ¿®ÃÃ²Æ¾¯ÆÀ°ÁÀ³ÂÀ­ÂÃ¬ÅÂ°ÁÁ®Á¿®ÂÁ±ÃÃ­ÃÁ¬Ã¾²ÄÂ±ÂÃ¬ÃÀ­ÃÁ­ÁÁ±Æ¿°ÂÀ­Ä¿¯À¿°ÀÁ¯Ä»®Á¿¯À¿³ÃÁ®Á»®Å¾®Á¿¬¿½®Á½¯¿À°Á¾­¿¾°¿¾­Â¾¬À¼±ÂÀ­Á»®À¾¬¾¼¯¿»«¾»¬Â»­Á½ª¾º«½¸«¾¾¨¼¹¬¼»«¾¾¨¾º©»»«À»«¾º§¾®¦µµ¦»¶£¹·¨¾·©¾¸§º¹¨¼¹©¾¹§½·¨½¹©¼¹¥»·ªÀ´¤»º©½¸¨¼º¥¾¹§½·¨»»§½º§»¸§¾¸¥¾¾§Â·©»º¨¾¸£Áº«½¼§»¸¨¾º©¾»ª¾º©Áºª»¸«¿º«¾»¤¿»©À»ª¾½©¾»¬Àº©¾»¦À»¬½¾¬¿¾¬Á»®½½¬Â¾ªÃ»­¿¾«ÂÁ­Ã¿®Ã»«Á¼ªÁÀ¬Â¾ªÁ»«Ã¿¬Â»°¿À±ÃÁªÁ»«¾»¬Â¾«Â¾«Á¾­Ã¾«Á¾¬¾¾¬ÄÀ©ÃÀ®Ã¾¯ÃÄ¯Å¿­ÆÁ°ÆÁ°Ä¾­ÄÁ°Å¿¯Ç¾°Á¾­ÂÁ®ÆÁ­ÈÁ´ÅÀ®Â¿®Ä¾°ÃÁ¬ÄÁ­ÆÀ±ÅÁ¯ÃÁ­ÆÁ®ÄÁ³ÇÆ°ÇÃ¯ÄÁ³ÆÂ±ÆÁ­ÇÂ±ÅÁ¬ÆÁ³ÆÂ¯ÅÅ³ÈÂ¯ÄÄ³ÆÀ²ÇÅ±ÆÁ°ÇÄ°ÇÆ³ÈÁ³ÄÄ²ÆÄ®ÆÃ²ÆÁ²ÊÆ¯ÊÃ³ÊÆ±ÈÄ³ÉÄ²ÆÄ°ÉÆ³ÊÅ²ÊÃ³ÈÃ¯ÌÄ±ÆÁ³ÇÆµÈÆ±ÊÄ¶ËÉ²ÊÇ´ÊÅ³ÈÂ²ÊÄ³ÉÁ²ÈÃ´ÇÆ³ÌÇ²ÊÊ³ÈÈ³ÊÈ°ÈÈ·ÌÆ´ÈÆµÈÉµÎÈ¶ÉË·ÌÇ·ËÉ´ÌÈ³ËÆ¶ÊÈ³ËÊ´ËÇ¹ÎÌ¶ÎÇ¶ÌÇµÊÄ·ÌÆµÌÈ·ÊÉ·ÊÊ·ÍÇ·ÊÈºÐÊ´ÏÈµÉÈµÌÍ¶ËÈ¹ÍÈ¸ÌÉ¸ÍÇ²ÊÌ·ÌÉ³ÌÇ´ÌÈ¶ÉÊµÑÈµÎÉ´ÍÉ³ÎÆ´ÌÈ·ÎÉ¸ÎÈ·ËÊµÎË¸ÎÆ·ÊÊ¸ÌÌ¶ÏÉ¹ÎÊ·ÌÉ¸ÐÍµÍÊ¸ÎÊ¹ÌË·ÐÊ·ÎÏ¸ÐÌ·ÐÈ¸ÏÌ·ÑÍ»ÐÌºÏÌºÎÍ·ÎÎ¸ÎË¸ÐÈ·ËÎ¼ÏÊ¹ÎÌ¹ÎË»ÐË»ÒËºÎÐ»ÏÎ»ÒÌ½ÏÍ»ÓÌ¸ÐÏ¼ÐÏºÐÌ»ÏÍ½ÏÏºÓÍ½ÏÍºÑÏ»ÑÏºÐÐ¼ÑÐ¼ÒÏ»ÒÐ½ÏÌ½ÒÐ¸ÐÍ½ÐÑ½ÐÑ¼ÎÎ¹Ë¾²¾¬²tqYlSiYtlYxoWztfz~d|fnow¤¬±¢¿ªÆ®Æ­¾±ÊµÎ¡¹Ø©½á°ÀêµÇð¿ÌúÇÓúÊÓúÌØúÐÛúÐàúÒÝúÕâúÖçúØèúÜèúÞíúàðúâïúâñúãóúæõúæöúãõúãöúãõúâôúãõúæ÷úä÷úé÷úèùúæùúç÷úè÷úæøúæúúëùúéúúéùúìúúëúúëúúìúúëúúìúúîúúñúúðúúôúúòúúòúúïúúðúúòúúòúúóúúòúúôúúùúúúúúúúúúúúúúúúúúúúúúúúúúúúúúúúúúúúúúúúúúúúúúúúúúúúúúúúúúúúúúúúúúúúúúúúúúúúúúúúúøúúúúúúúúöúú÷úúõúúóúúñúúîúúëúúêúúëúúêúúæúúèùúçùúèúúçøúçøúçúúæøúäöúãõúäôúßòúáòúßôúÜïúØïú×ëúØìúÖèúÖæúÓéúÐãúÎßúÐâúÍáúÓãúÏáúÌàúÎÙúÎÝúÊÝúÈØúÈ×úÃØúÆÒú¾Òø½Ïø¾ÍùÃÐù¾Îö»Í÷»Îó»Èî¸Ãä²Áß©»Ô¢³Ï¤²Ì°Ë£®È ­ÁªÀ«¶¥µ¤µ£¡zol~gt[znUwfUtkSt_Uk[Ml`InYQg_SqbQrwlÂ®·Ê»ÅÐ¼ÌÒ¾ÍÐ¾ÏÒÀÏÏ½ÒÐ¼ÌÏ½ÐÎ»ÒÒ¼ÐÐ¾ÐÐ¾ÑÓ½ÐÐ¼ÐÏ¾ÎÐ½ÎÍ¾ÑÎ¾ÑÒ¾ÐÌ»ÏÌ½ÎÈ»ÏÌ½ÐÎºÏÌ»ÐÎ»ÎÊ¹ÌÎ¸ÎÌ¸ÊË¸ÌÊ¹ÎÌ¸ÏÉ¸ÍÌºÏÊ·ÌÊ·ÊÊ¸ÊÉ·ÍÉ·ÌÊ»ÌÉºÊË³ËÊ¸ÌË»ÎÌ¸ÌÉºÌËºÊË·ÏÊºÊÈ¸ÌÈµÊÊ»ÌÊ¸ÊÈ¸ÌË·ÊÈ·ÈÇ·ÉÈ²ÊÈ¶ÊÈ´ÈÇµÈÈ³ÇÇµËÆ¶ÉÇ¹ÉÆ¶ÊÆ¸ÉÈ¶ËÈµÈÆ¶ÈÅµÅÇ·ÇÄ²ËÆ´ËÆµÈÄ²ÇÄµÉÄ¶ÆÄ±ÇÆ³ÆÆ³ÆÆ¶ÆÄµÅÃ¶ÇÈ°ÉÃ³ÅÄ²ÅÃ³ÈÅ³ÈÄ²ÃÂ³ÅÄ¶ÆÄ³ÆÃ³ÄÁ³ÇÁ´ÅÆ²ÇÆ³ÆÀ²ÄÈ´ÆÀ³ÇÂ³ÅÃ²ÄÃ²ÆÆ²ÄÁ°Ã¿®ÃÂ²ÆÂ°ÃÃ±ÅÂ³ÃÃ±ÆÀ°ÃÂ®ÃÁ°ÃÁ³Æ½®ÃÁ³ÅÀ¬Á¾®ÇÁ³ÂÀ²ÆÁ¬ÁÃ³Æ¾®ÅÀ®¿¿«ÀÁ°Ä¿¬Â½®À¾®ÃÁ°À¿²ÃÀ¯ÃÁ°Ä¾°ÁÂ±À¾¬Ä¾¯À½±À¾¬ÃÀ¬Á¹°¿¾®Á¾°¾½°Ä¿¬¿¾­Â»­À»¯Áº«À½«Á¾®Ã»ª¾¸¬À¾«À»ª¾¼¯¾¼©½½«Á½ª¼»ª¾º©»ºª¾»­½º­¾»«¾·«»»¬»¸¬½¸¬½¼¯¿¹¬½º«¿º¬¾¼­½º«½»ª½º«¹º«»¹©¼¹©»¸ª»¸©»º¨½º§¸·§º·§À·§¹·©¸¶¦º¶ª»µ¥»¹©»·§¾·¨··¤»µ©½¶§µ·¦»·¨º³ª¸µ¥»µ§··¨¼½¬¾½©Á¾©À¹­Ã½ªÁ¼¬À»ª¿¾«¿»«Á½¦Ã¿¦¾»«Á¾¨Á¾¬À»¨Ã¾¨Á¿­Â¼¨ÃÁ¬Á¾­Â¼¬ÃÁ¬Ã¿ªÃ»­Â½ªÄÀ¬Ä¾­½¾©ÄÀ°ÆÁ¬ÁÁ­Æ»¬Å¿¬ÃÁ¬ÆÀ®ÆÁ«ÃÁ³Æ¾«Å¿®Ã¾¬Ä¿®ÄÄ­Ç¿±ÄÂ°ÅÀ¬ÈÁ®ÆÃ³ÇÃ¯ÆÀ±ÆÃ³ÈÃ¬ÇÃ­ÇÁ±ÅÃ³ÇÃ®ÉÀ°ÄÂ¯ÇÄ±ÆÁ¯ÅÅ±ÉÂ®ÃÁ³ÇÆ­ÅÃ­ÆÅ³ÈÅ²ÈÃ±ÇÁ³ÆÆ¯ÈÇ®ÈÃ°ÈÂ·ÈÃ´ÊÄ°ÇÄ³ÈÆ³ÈÅ³ÉÄ³ÊÆ¯ÉÃ±ÊÆ³ÇÄ´ËÆ¯ÉÆ·ÊÇ³ÊÄ²ÈÆ²ÇÄ¯ÊÃ³ÊÈ³ÊÅ²ÊÃ°ÊÉ·ÈÆ³ÊÈ²ËÆ´ÊÊ¸ÎÆ²ÈÉ¶ÍÆ¸ÌÈ°ÊÇ·ÍÈ¶ÉÆ´ÏÉ³ÈÈ·ÍÆ´ÌÊ³ËÆ´ÌÈµÌÃ¶ÌÆ²ÎÈ³ÎË³ÌÆ³ÌÈ³ÐÉ¯ÊÈµËÌ·ÊÉ·ÎÆ¶ËÌ·ÌÊµÐÊµÎÈµÌÊ·ÐÉ·ÌÈµÌÍ·ÎÍ¸ÐÌ¹ÑÊ´ÒÌ¶ÎÈ·ÎÈ·ÐË¶ÎÊ´ÎË¹ÎË·ÌÌ¹ÐÊ´ÐÍ¶ÏÈ¶ÍÌ·ÓÌ»ÐÊ¹ÐÌ·ÏÎ»ÐÌ¹ÑÌ·ÏÉ·ÒÌ¹ÐÌ»ÐÎ·ÒÌ¼ÌÌ¹ÒË¶ÏÎ¹ÐË¸ÐÎ·ÍÎºÎÌ¼ÑÎºÒÌ·ÏÍ¸ÎÑ»ÒÐ¹ÒÌ·ÒÏ·ÓÏ¹ÓÌºÎÎ»ÓÌ·ÑÌ¸ÒÎ»ÑÐºÒÎ¹ÒÎ»ÔÎ»ÔÍºÑÎ·ÐÐ¼ÐÏ¹ÎÊ»ÎÐ¼ÑÏ»ÒÎ¹ÒÎ¿ÓÍ¹ÒÎºÐÐºÒÐ¹ÒÐ¾ÓÐ¾ÖÎ·ÒÑ½ÒÑ¾ÕÓ·ÕÌ½ÔÒ¼ÒÒ½ÒÏ¼ÒÐ»ÓÓ¼ÖÒ»ÓÓ¼ÔÑ»ÕÓ»ÒÐ½×Ó½ÕÒ¾ÔÒ»ÖÒ¼ÔÑ¼ÖÐ½ÓÔ½ÔÕÁÒÒ¾ÕÒºÖÒ»ÖÒ¾ÖÔ¿ÖÒ»ÕÏÀÖÓ»ÕÔ¾ÖÓ»ÓÑ¿ÕÒ¾ÖÓ¾ÕÓ¾ÓÓÀÕÓ¾ÕÓ½ØÒ½ÖÒ¾ÖÖ¿ÖÕ¿ÕÕ¿ÖÏ½ÐÈ±Æ¨²uzbu`u`z`|{dblnxz|¡¦·¦¼¬Á±Ä³È·Ã¶Ì·Ò¢½Ý­¿ã³Æì¹Êô¿ÎúÈÕúÈÙúÌÛúÓÜúÒãúÖçúÙäúÖêúÜìúÝîúßðúáóúåõúçöúèùúéøúæùúæúúèöúèúúéùúèøúçøúèùúëúúîúúéúúéúúìúúìúúìúúëúúíúúëúúðúúìúúïúúïúúïúúðúúòúúôúúóúúõúúöúúôúúðúúðúúôúúõúúùúúõúúúúúúúúúúúúúúúúúúúúúúúúúúúúúúúúúúúúúúúúúúúúúúúúúúúúúúúúúúúúúúúúúúúúúúúúúúúúúúúúúúúúúúúúúúúúúúúúúúúúúúúúöúúóúúòúúòúúñúúïúúíúúíúúëúúìúúíúúìúúëúúíúúíúúìøúçøúåúúæöúåöúæöúàôúàôúàïúÞðúÙïúÛïúØìúÑêúÓçúÓêúÒèúÒçúÐãúÑåúÎáúÎáúÊáúËÝúÎÜúÆÛúÆÙúÂ×ú¿ÖúÁÒúÆÔúÁÕúÃÒú¿Îö»ÍðºÈë´ÈáªÀÚ¦»Ó¤´Ð¥¶Ð¤³Ì±Ã°Æ´½¬´§»¨¬¡tnk|`w`o]~q[zl[tgWukWtdYrfYwi[xq¡¡Æ³»Ì»ÊÕÀÓÕ¾ÒÓ¿ÓÕ¾ÖÑ½ÖÔ¿ÕÒ¾ÕÕ¼ÖÕÁØÒÁÕÕÁÕÖ¿ÖÖÃÕÖÁÔÖÁØÔ¿ØÖÁÕÕÁÖÕÀÕÒÁÓÒÂÔÓ¾ÖÐ¼ÒÓ½ÒÐÁÕÐÁÑÎÀÐÐ»ÑÐ¼ÒÓÁÒÒ½ÓÐ¼ÏÓ»ÔÍ»ÑÐ»ÐÑºÓÐ¾ÑÐ»ÑÐ¿ÑÎ»ÓÎ»ÐÐ½ÔÎ»ÒÑ»ÓÎ¼ÐÎ½ÏÐ»ÏÊ»ÑÎ¼ÎÐ½ÑÌ»ÍÌ¹ÐÍ¹ÎË¼ÌÌ¸ÐÌºÐË¿ÐÉºÐÌºÐË¹ÎÍºËÐºÐËºÌÎ¾ÌÎºÒÌ¹ÍÊºÐÌºÌËµÍË·ÍÉ·ÌËºÎÍ¶ÍËºËÉ·ÌÈ·ÍË·ÎÊµÎÇ·ËÆ¶ÎÈ·ËÌ¸ÌÈ·ÌÈ¶ÌÉ¸ÌÊµÌÈ¶ÌÉ·ÌÉ¹ÈÈ·ÊË´ËÆ·ÈÈ´ÌÊ´ÊÈ¶ËË´ÉÊµÌÉ»ËÇ³ÌÂ¶ÍÇµÉË¹ËÈ¶ËÇµÈÇ³ÊÄ¶ÉÃ³ÊÆµÇÉ±ÈÆ³ÈÃ¶ÈÃµÊÆ³ÇÃ³ÇÈ·ÊÆµÊÆµÉÆ³ÈÃ´ÉÁµÈÅ´ËÆ´ÊÃ±ÈÂ²ÈÈ³ÈÆ²ÉÃ³ÉÃ¬ÈÃ³ÆÃ¶ÇÅ±ÅÀ°ÆÆ°ÆÄ²ÈÂµÄÁµÆÃ³ÈÁ°ÅÃ³ÆÁ³ÄÄ¯ÂÁ°ÇÃ°ÇÁ³Å¾±ÅÄ³ÅÁ®ÅÂ­ÃÁ¯ÄÃ®Ç¿±ÅÀ°ÆÁ®Á¼³ÃÁ³ÃÁ­ÆÁ±Å¿°Å¿²Â¿°ÁÁ³ÄÁ®Å¿«Ã¾¯ÃÀ¯ÃÀ¯Â¾°ÃÀ¯ÃÁ±ÂÀ®Á¿®Ã½¬ÃÀ±¿»«Ä¿²Â½­Â¾¬Â¾¬Á¾­Â¾«Á¿­Ã½¬Â¼¬Á¾¬À»ªÁ½®Á¼ªÂ¼«À¾¬Á»©À»¬¿¼­¼¼ªÁ½¬Á¹®½¹©¾»¬Á»¬¾¼¬À¼¬¾¹¬½¼«½¹«¼®£³´§º·¢º·©»¸§½¸¥½¹©½»§»¸©»¸¥»¶¨¾·§»º¥½¸£º»¨¼º©½¹ªºº§¾º«À·§¼ºª¾¹¨¿¹§¼º©À¹¦»¼§½º©¾»©¿¸¨¿·ªÁ·¬½»ª¾ºª¾º§Á»ª½¸©À½¬Â»«¾»ª¿»¬Á»ª¿¸«À»­Á¹®Á»®¿½«¿¼¬¿»«ÃÀ®Á½©Á»¬¿¾ªÁÁ«Á»®Á»¬Á»¬Ä¼®Á¿¬À»¬Á¿¬Á¾­Á¾¬ÁÀ«À»¯Â¾«Á¿¯À¼¬Á½­Á¿­Ã¾®Â¾«ÃÀ­Â½²ÂÁ«Ã¾«Á½°ÆÁ¬Ã¿¬Ä¿¯ÃÁ°ÃÃ±Æ¾°Á¾­ÄÁ¯ÆÂ±Ã¿³ÆÁ²ÃÁ®ÂÂ°È¾°ÅÁ®ÆÁ°ÆÁ°ÆÂ°Æ¾±ÆÀ°ÆÃ±ÉÂ­Ç¾²ÆÃ¯ÈÂ²ÄÄ±ÈÁ±ÇÅ²ÆÂ±ÇÄ°ÆÄ²ÃÃ´ÈÄ³ÇÃ´ÅÅ±ÅÅ±ÆÄ°ÈÃ°ÆÃ²ÇÆ²ÆÁ®ÈÃ²ÈÅ¬ÃÃ³ÈÆ²ÇÂ°ÈÁ²ÈÆ¶ÉÃ²ÌÇµÊÃ³ÉÅ³ÊÄµÌÅ·ÇÆ³ÊÉ´ÊÅ³ËÆ®ÉÅ°ÇÇ²ÌÇ²ÌÈ²ÇÇµÉÇ·ÊÆ°ÎÄ·ËÆ¶ÉÆ´ÍÇ´ÈÆµÊÅ²ÇÈµÌÉ·ÊÆ²ÌÅ³ËÇ³ÊÈ·ÌÇ·ÌÆ·ÌÈµÌÈ·ËÇµËÇ³ÊÈµÌÊ¸ÊÈ´ÊÉ¶ÊË·ÌÇ·ÍÊµÌÉ¸ÊÌ¸ÐÊ²ÌÇ¶ÊË¶ËÈ·ÌÆ·ÌÉ·ÍÈ³ÌÉµÊÊ¶ÌÊ¸ÌÆ¶ÌÈ·ÎÈ·ÎÇ¸ËÊµÎÈ·ÎÆ·ÌÈ·ÌÊ¸ÍÊ·ÍÊºÒÈ¸ÎÈ¹ÎÌ¹ÐË¶ÏÌ´ÎÇµÍÊ´ÏÊ·ÎÊ»ÍÌºÎÌºÏÌ»ÐÊ¸ÌË»ÏÊ¸ÏÌ»ÒÌ·ÏÊ·ÑÌ»ÎÌ»ÒÉ·ÌË¹ÏÊºÎÍºÏÌ½ÎÍ¸ÎÍ¸ÐÎ»ÏÏ»ÑÎ»ÒÏ»ÐÎ¸ÏÏ¼ÏÌºÍÑ¿ÐÎºÒÍ¸ÏÊ½ÒÐ»ÐÌºÐÌºÐÐ»ÐÏ¾ÒÎ¼ÏÎ»ÏÎ¹ÐÌ»ÐÎ½ÒÐ¸ÍÊºÏÐ¼ÎÌ¸ËÄ®Á¨±qq`q[rY{n[zt]|{`~g|nntz£z©±¡¶¦¹¦»¬Ä®Æ±Æ³Î¡¶Ö£ºÖ«ºæ±Ãð¸Æô¾Íó¿ÏúÆÓúÎÖúÎÝúÒáúÕäúÕãúÓèúÕçúÜêúÝïúãïúãòúæõúæòúàõúãöúäõúéõúæ÷úäõúä÷úäöúæ÷úåöúçùúêúúéùúëùúéúúéúúìúúæúúëúúêúúèúúìúúïúúîúúðúúïúúñúúðúúòúúñúúðúúðúúðúúòúúôúúôúúöúúùúúúúúúúúúúúøúúúúúúúúùúúùúúúúúúúúúúúúúúúúúúúúúúúúúúúúúúúúúúúúúúúúúúúúúúúúúúúúúùúú÷úú÷úúùúúöúúöúúõúúóúúïúúìúúíúúîúúïúúêúúêúúêúúéúúëúúëøúêøúæøúêøúçöúâöúãôúßõúàòúßóúÜðúÚîúÛíúÚêúÕêúÐèúÖåúÐæúÓãúÓäúÐæúÎâúÐßúÌãúÌáúÌÝúÊÝúÊÖúÇØúÆÖúÁÔúÁÎú¾Ðú¿ÏúÁÐúÁÏú¿Îö½Èó»Æì³Æç¯ÀÜ¨¹Ò£¸Ì¡²Ì¬Æ«Ã©Á¨»ª¸¦®¡®¡ªzrk|f{d{o[{gYxgUrkUq_Ui`OofQlbOn`Slrdº­·Í¹ÇÏ¼ÌÎ¾ÏÒ¼ÑÏ»ÌÎ¾ÐÐ¼ÑÑ¾ÐÎ¼ÒÔ¾ÔÒ¾ÐÐ¿ÒÐÀÓÐ¼ÒÑ¾ÐÒ¾ÒÎ½ÒÎÀÎÒ¾ÒÏ¿ÓÍºÎÍ¼ÎÏ¸ÏÏ¼ÏË»ÎÏ·ÎÊºÊÌ¼ÎÎ»ÐÉºÌÊ»ÎÎ»ÎÎºÍÉ»ÎË½ÎÌºÌÊºËÎ¸ÌÌºÍË½ÌÌ·ÌÈ¸ÍÈ·ÊÌ»ÐË¶ÊÇ·ÎÈºÈÌ·ÈÊ·ÊÇºÌÇ¶ÊÈ·ÌÊ·ÈÆµÌÊ·ÌÌ·ÊÉµÌÈ¸ÊÈ³ÊÇ´ËÉ¶ÈÆ¸ÊÇ¸ÇÆ³ÊÈ·ÊÆ·ËÈ³ÊÄ´ÉÃ¸ÉÇ³ÅÅ³ÈÃ·ÈÈ³ÈÇµÇÃ±ÆÄ³ÇÄ·ÈÃ³ÆÇµÈÃ²ÇÆ´ÊÈ´ÇÈ¶ÄÆµÈÇ³ÇÄ³ÆÃ³ÄÃ³ÊÃ°ÇÆ±ÉÆµÇÄ´ÈÃ²ÇÃ±ÆÃ²ÇÃ³ÆÃ²ÆÃ±ÇÂ²ÅÁ·ÈÄ²ÇÃ³ÄÆµÆÄ´ÅÁ°ÃÄ³ÄÁ±ÆÃ²ÃÄ³ÃÂ¬ÄÀ±ÁÃ´ÆÁ²ÇÃ­ÃÀ³ÄÁ²ÄÀ®Ã½°¿Á²ÁÀ°Æ¾°ÅÁ°ÅÁ°ÂÂ±ÃÃ°ÃÁ®Ã¾¯Á¾±Â¿°Á¾±Ã»°¾¿°Å¿¬Â½®Á¾²Ã¼«Â¾°Â¿­Á½®À¾¬À»­¿À­À½°À½¬¿À­Â»­¾¾­Á¼«Á¾­À»¬¿º«¾»¯À»¬¾½«¾»¬¿½¯¾»®Â»¬½¸¯¾»«¿¼ª¾º¬½º¬À»¬¿¹¬¿º­¿½©¼»«¾»«½¹¨¾¼¬Áµª½»«¿º©¸·¬¼¼¬¾¸«»¹©½¸­½¼«¾º«½»§½³ª»¸©¼ºª¼¸¥½µ«º·©½·¥»¸§º·©º·¨¼·©º¶ª¼¶¥¹·§¸·«¹µ¦¹µ¥º»«»·¦·´¥·³¥¸µ¨»µ¥¶¾¬Â¾¦À¾ª¿»©À¿©¿»©¿¾­Á»¬À¾«¿¼¬Á¾§Á½©¿¿¬Å¾©À¼¬Á½¬Á¿§Â½¬ÃÁªÃ¾¬Á¿«Ä¼¬À½«Ã¿¬Â½¬ÂÃ¬Á¾¬Ã»°Ã¾­ÂÃ¬Ã¾¬Ä¾®Ã¾ªÂÁ¬Á¿¬ÁÁ­Ã¾­ÆÀ®ÆÁ¬Ä¿²Å¿­À¿¬ÆÄ¯ÇÁ°ÃÁ¯Ã¿°ÆÁ®ÂÅ¯ÈÂ³ÃÃ´ÆÁ®ÇÁ³ÃÁ®ÉÂ±ÆÃ¯Æ¿°ÆÁ²ÆÃ°ÈÂ°ÆÂ°ÆÃ¯ÇÃ°ÈÃ²ÆÄ³ÆÃ¯ÅÂ¯ÇÁ®ÆÂ¬ÇÃ³ÇÇ³ÉÃ±ÇÀ°ÈÂµÆÃ¬ÆÃ±ÊÃ³ÇÆ³ÌÆ±ÌÈ´ÉÆ¯ÊÁµÊÅ¯ÌÆ²ÊÅ²ÊÆ¶ËÅ²ÊÅ³ÆÇ³ÈÆ³ËÆ³ÊÆ±ÈÇ¶ÉÃ³ÊÇ·ÊÇµÊÅ³ÌÉ·ËÆ´ÍÅ±ÇÇ¶ÊÈµÎÇ¶ÌÆ´ÌÇ²ÊÈ³ÌÈ¶ÊÈµÊÈ¶ËÇ³ÊÊ´ÊÅ³ÊÈ´ÊÇ´ÍÊ³ÌÆ²ÌÇ¶ÍÊµÎÆ´ÐÇµÎÈ´ÍÆ³ÎÈµÌÈµÐÈ·ÐÇ³ÍÊµÎÇ³ÌÉ´ÏÈºÎÊµÏÆ´ËÊ¶ÎÊ³ÎÇ¹ÌÈ·ÎÉ·ÏÊ´ÏÈ¸ÒÌ¶ÎÌ·ÐË·ÍË·ÒÈ·ÐË¹ÎÌ·ÐÈ·ÏÊ·ÎÎ»ÏÌ·ÍÌ»ÐÉ´ÐÉ¹ÏÌºÎÎ·ÎÍµÎÍ»ÍÊ³ÎÊ·ÎÌ·ÐÌºÎÌºÐÊºÎÌ¹ÐÌ¸ÑÐ·ÍÎ½ÑË·ÒÏºÐÌ»ÒÎ»ÓÊºÔÌ¹ÐÍ»ÓÌ¹ÑÍ»ÐÊ¸ÐÏ»ÓÌºÐÎ·ÐÍ¹ÑÎ½ÒÍºÑÎºÏÌ»ÐÑ»ÑÎ¼ÔÎ¾ÏÌ¹ÒÎ¹ÒÏ»ÐÏ¼ÕÎºÕÑ»ÐÎ½ÔÎ¼ÑÒ»ÐÐ¿ÕÒ¼ÕÑ»ÑÌ¼ÑÒ¹ÔÐ½ÓÍ»ÓÐ¾ÎÎ¹ÕÒ¼ÓÎ»ÓÎ»ÕÐ¾ÔÑ½ÕÐ»ÒÑ½ÕÏ½ÓÔ¿ÒÑ»ÔÑ¾ÖÓ»ÕÐÁÕÐ¼ÖÐ¼ÒÕ¿ÕÒ¿ÕÑ¼ÓÑ¼ÕÕ¼×Ó¿ÖÓÀÓÐ½ÕÏ¾ÖÓÁÕÒ»ÖÒ¾ÕÓ¾ØÖÀØÑ¼ÓÒÀÒÓÀÖÑ¾ÓÒ¾ÑÌ»ÎÆ­Æ©¯u{`xbx_~|f~bdrru|¢® «¡´¥¿±»®Æ³Ì´Ê¡µÈºÐ»×¦¾Ý­ÂèµÇð°Êí·Îó¼ÒúÆ×úÏàúÖâúÖèúÕèúÖçúÕëúÞîúàðúâóúæôúéöúç÷úã÷úæúúç÷úé÷úìùúìúúçúúæøúæúúèúúèúúæùúìúúëúúïúúîúúíúúîúúëúúíúúíúúïúúïúúïúúóúúòúúõúúõúúóúúòúúôúúðúúôúúôúúõúúöúúóúúõúúöúúúúúúúúúúúúúúúúúúúúúúúúúúúúúúúúúúúúúúúúúúúúúúúúúúøúúúúúúúúúúúúúúúúúúúúúúúúúúúúúúúúúúúøúúøúúøúúöúúóúúóúúðúúòúúñúúñúúòúúïúúîúúìúúîúúïúúèúúéúúêúúëúúçúúçöúäöúáôúãôúàóúàóúÜðúÜðúÙïúÕîú×ìúÖêúÖêúØéúÓìúÕäúÕèúÐçúÐåúÌãúÏáúÊàúÌÝúÈÛúÄÛúÃÖúÅÛú¿ÔúÃÕúÆÓúÁÎ÷ÀÎö¼Ìï¶Èè¯Àß¬ÁÔ¤ºÒ£³Ð¤²Ê³Å­Ä¬½°º©­¨°¡¬xtln~fzd|r_~qYzo]{i[wlWudUuiQzlYxwbÁ°¹Ó»ÊÕ¾ÐÑ¿ÕÖÁÖÔ½ÕÔÁÖÓÁØÓÀÖÐÀÓÕÁ×Ö¿ÖÒÂÖÕÃÖÓÃØÔ¿ÕÒÃÓÓÀ×Ó¿ÕÒ¿ÕÐÀ×Ð¾ÒÓ¿ÕÓ¿ÖÒ¼ÒÑ½ÐÏ¾ÕÎ¾ÑÐ¼ÓÑ¾ÔÎ»ÒÒ¿ÕÎ¼ÓÒ½ÒÍ¼ÑÐÀÒÐºÐÌºÎÏ¹ÐÎ»ÐÐ¼ÐÌ¼ÐÌ¸ÎÐ»ÐÐ»ÏÎ¼ÒÎºÎÌ»ÒÎ»ÒÎ»ÐÍ»ÐÐ¹ÒÌ»ÓÎ¹ÎÌºÐÎ»ÐÌºÌÊ¹ÐÌ·ÐÌºÐÍ¹ÐÊ¸ÏË»ÎÎ»ÍÎ¸ÍÌ¼ÎÍºÐÎ·ÌÈ·ÍÈ¸ÐÊ·ÍËºÊÆµËÈ¶ÏÊ¼ÎÈ¸ÌÇ¹ÌÊ¶ÍÌ¸ËÉ·ÍÉ·ÌÊ¹ÌÍ¶ÊÈ·ËÈ·ËÊ³ÊÊ¶ÎÉ½ÌÈ³ÊË´ÌÈ¶ÉË·ÊÈ¶ÊÆ·ÌË¶ÌÈ·ËÊµËÇ¸ÊÈ¹ÊÇ¶ÊÊ·ÊÉ´ÉÇ³ËÈ¹ÎÆ²ÇÈ¶ÊÉµÉÆ´ÊÆ³ÊÄ³ÈÈ²ÊÇ³ÉÈ¶ÊÄ³ÉÆ´ÈÄ´ÊÃ³ÊÆ¶ÈÆ´ÈÆµÉÅ³ÊÄ³ÈÇ²ÈÆ´ÈÀ°ÅÅ¶ÇÅ³ÈÂ³ÊÅ±ÅÂ³ÆÂ²ÆÁ´ÈÅ³ÅÅ°ÇÃ´ÅÁ´ÇÃ®ÈÁ²ÈÁ³ÆÂ±ÆÅ¯ÄÂ°ÅÂ´ÅÁ²ÃÃ²ÃÁ°Ç¾³ÅÃ²Å¿¬Ã½²ÂÄ±ÄÀ°ÅÁ²Ã¾®ÃÂ¯Ã¿®Å¾³ÁÀ¬ÃÂ®ÃÀ°ÃÁ®Ã½®Â¾±Â¿¬ÄÁ®Á½¯ÂÂ±Ä¿­À¾®ÁÁ¯ÁÂ®ÀÀ¬Ã¾¬ÂÁ©Å¿¯Â¾¯Ä¿¬Ã¿²¾»¯Ã¿­Á¿¬Â¼¬À¿«Â¼¬À¾®Á»®Á»¬Á¹­¼¾ªÃ¼ª½»¬À¼¬À½¬¿»¬¿¼«À»¨½¸¬¾»®À·ª¾¼«Áºª¾¼«½¹©À»ª½¹©¾­ ·¸¦»µ¤»·©»·ª½µ¡¾¸¨º¸§»¸§»·§»·¦½¹¦»º¤½¸¦»¹¨¼»£¾¹¨À»¨»¼¥¾¸ª¾·§»º£¾·ª¾»ª»»¥½»ªÁ½¨½º©Á¿«¾¸©½¹«Á½¬¾»§½»ª¾»©Á»«Àº«À¾«Á¹§¾½©¼½«Â»ª¿¼¬¾¾¬Á¾¬Á¾¬Ã¾¬¿¼«¾¾¬Á»«¿Á¬ÃÁ«Á»ªÀ½©Á¼¬Á¾¬Á»«ÀÀ¬ÂÁ®Á¾®Á¾¬Á¾¬ÆÁ¬Ä¼­ÃÀ­ÁÁ«Ã½®ÁÁ±ÃÀ¬Ã¾¬Á¾¬ÃÁ®ÃÀ¬ÂÀ¬ÀÀ¬ÇÁ¯ÁÁ¯Ä¾°ÃÁ®ÃÁ±ÅÁ®ÆÃ¯ÈÃ±ÅÁ°ÄÃ­Å¿±ÂÀ®ÃÁ­ÆÃ²ÅÃ±ÆÂ®ÄÁ¯ÆÁ®ÆÂ²ÄÁ²ÇÃµÇÄ³ÇÅ°ÅÃ²ÄÃ±ÆÁ®ÈÃ²ÆÆ¯ÈÄ³ÈÃ°ÈÅ²ÊÂ±ÈÄ°ÆÅ³ÈÃ²ÆÄ®ÅÂ³ÄÄ°ÈÄ±ÄÃ°ÉÄ±ÈÄ°ÈÆ²ÈÅ®ÊÆ²ÈÃ°ÊÄ´ÈÄ°ÈÃ°ÉÆ´ËÆ³ÈÆµËÇ´ÈÈµÌÆ°ÆÅ³ÇÆ´ÌÂµÈÅ´ÊÆµÊÆ¯ÊÇµËÈ³ÉÄµÊÇ´ÌÈ²ÈÆµÊÈ³ÊÉ·ÌÊ±ÊÇ´ÊÆ±ÌÉµÈÅ¶ÊÊ³ÌÅ¶ÈÇ´ÊÊµÌÉµÇÇ³ÌÊ·ÍÆ³ËÉ·ÎÈ³ÉÊ´ÍÇ·ÊÈµÌÈ¶ÊÉ·ÎÉµÎÈµÊÊ´ÌÍ¸ÌÊ¶ÐÈ·ÍË·ÊÌµÎÈ¹ÌÈ¸ÊÊ´ÌÈ·ÎÊ´ËÊµÌÉ¶ÌÊ³ÎÌµÌÊ·ÍÉ·ÌÊ·ËÊ·ÌÊµÍÊ´ÎÊ·ÌÈ¹ÍÌ¹ÍË´ÌÈµÍÌºÏÌ¹ÌÊ·ÏÌ¸ÌÊµÎÊ·ÎÌ»ÎÍ¹ÎÌ¸ÐË¶ÎË¶ÍÊ·ÎÎ·ÐÊºÎÈ¸ÌË¹ÌÌµÑÎ¼ÑÎ¹ÎÎ¹ÎÌ»ÐÊ»ÎÎ¹ËÌ¹ÎÍ»ÏÎ»ÏÐ»ÒÏ»ÒÏ¾ÎÎºÏÌ»ÑÎ¼ÒÐ¾ÐÎ¹ÎÐ½ÏÏ¸ÒÏ»ÒÍ»ÐÏ»ÒÍ»ÌÏ¼ÑÍºÐÎ¼ÐÐ¸ÑÒ¼ÒÎ»ÏÏ¾ÎÐ»ÎÌ³È·§¸¦kt`q]|t]{ug~|`fkntz§¨ ª®£º¥À«Æ­Å±È²Å³É·Ð·Ö§·Ûª¿Ý¬Ãß¬Æê·ÉúÄÕúËÙúÐÛúÒáúÒäú×äúÖèúÙèúÛîúàïúâñúèòúãôúáðúäôúæõúã÷úæõúåöúáöúäöúåöúâ÷úäöúæ÷úæùúéùúëúúçúúêúúëúúêúúëúúíúúîúúëúúìúúïúúïúúïúúñúúðúúîúúîúúïúúñúúòúúòúúôúúñúúîúúñúúøúú÷úúøúúúúúúúúúúúúúúúúúúúúúúúúúúúúúúúúúúúúúúúúúùúúúúúúúúúúúúúúúúúúúúúúúúúúùúúùúú÷úúøúú÷úúõúúöúúòúúïúúîúúëúúìúúîúúïúúéúúéúúèúúæùúæøúç÷úâ÷úáóúåóúäõúáöúàñúÜóúÞòúÝðúÛîúÜñú×êú×êúÒëúÔæúÐéúÓçúÐæúÔçúÐäúÓäúÌáúÎàúÎÞúÊÜúÈÚúÇÛúÇÛúÆØúÂÒúÁÔú¿ÓúÀÍúÁÎú½Ïõ»Éñ¶Æì®Ãä¬¼Þ§»Ù¢·Ï¤´Ì®Ç¬À¬À¦¸¤´£¬¥ztulg|dubzq_ur[rfYtdSndQl`SibQn`Uqo]Á¯¶Ì»ÅÐ¾ÎÐ½ÌÐ¾ÏÐ¼ÐÏ¾ÐÏ½ÐÐ¾ÑÑ¼ÎÎ¾ÒÑ½ÒÒ¾ÒÏ¾ÐÒ»ÐÐ¾ÏÓ¾ÑÎºÓÎ¼ÎË»ËÎ¼ÑÐ»ÌÌ¼ÎÌ»ÏÎ»ÌÌºÎÎºÑÎ¼ÐË·ÍÌ¶ÌÌºÊÌ»ÍÊºÏÎ»ÎÌ¹ÌÌºÎÊ·ÌÌ·ÊÈ¸ÐÊ¸ÊÌ¹ÌÊ·ÌÊ¸ÎÊ·ÌÊ»ÍÍ·ÌÌ·ÌÊ·ÊÌ¸ÊÊ¸ÌÈ³ËÈ·ÈÌ·ÌÊºÊÈ·ÊÈ·ÊËµËÈ·ÊÉµÊÊµÇÇ·ÌÈ³ÊÆµÈÈ·ËÈ´ÈÈ¶ÉÈ·ÈÇµÊË·ÈÇ¸ÇÈ´ÉÈ³ÈÆ¶ÈÅ´ÈÆ³ÊÄ³ÆÊµÈÄ³ÇÄ³ÉÃµÈÅ¶ÆÄµÊÆ·ÈÇ²ÈÇ³ÈÆ³ÆÅ²ÇÆ·ÄÄ³ÇÇ´ÆÅ²ÇÅ³ÆÆ²ÈÄ´ÄÃ³ÈÄ²ÆÄ³ÆÀ´ÃÅ±ÆÃ°ÆÄ·ÆÄ°ÆÂ²ÆÃ°ÃÄ²ÇÁ´ÇÃ´ÄÀ°ÄÁ°ÆÁ°ÃÃ²ÆÁ±ÄÀ«ÂÀ³ÆÀ²ÅÁ¬ÁÁ²ÆÁ­ÁÂ°ÁÁ³ÅÂ²ÃÁ¯Ã¾°Á¿¯ÆÁ¬Æ¾²ÂÁ°Á¾¬ÃÁ®Ã¿®Ã¿®Ã»¯ÁÂ²Á¾¯ÃÁ®Á¼°ÃÁ«¾¼¬¿À®Â¾¬¿Á­Á½°¾½¬Á¿®Á¾­À½¯Á¼­Á½«¾½­Á¾­¾»¬¾¾«À»«¾»©¿»¬À»¨¾»¨»»¬¼½ªÀ»«½»©¾½¬¿¸¯¾¼¬À¾«Àº®¾¸­½»¬¿»«¾º¬¼»­¾¼¬¿»°½»«¼¸§¾»§»º«¾»®»¸®½¸¬¼»¨¾¹¤¼»«½¶§¼·¬¼·«½¸ª¼¹§¼¸ª½¹¥º¶£½·¨·¸ª¾º§»·ªº¸§¼·¦¸·¦»¹©»µ¤ºµ«¹µ¦¼·¤·µ¥»·¢¸´«º½«¾¿¨¿¾«À¾ªÀ½©À»¬¿¾©Á½¨Á½ª¾¹¨À¿¬Á¾¬Â¾¬Ã¼«Ã½¬ÁÁ©Â¾¯ÃÀ¬Â»ªÁ¾¬ÃÀ¨Å½«Ã¾¬Ã¾ªÃÃ¬ÄÀ­ÃÁªÃ¾«ÀÁ­ÂÁ«Æ¾­Á¾¬ÅÁ¬ÆÀ«Â¿¬Å¼­ÃÀ­ÃÀ¬ÆÁ®ÃÂ¬ÁÁ®Ã¿°ÅÁ¯ÇÁ±ÃÁ®ÆÄ±ÆÃ¯ÆÂ³ÆÃ¯ÅÀ¬ÆÃ¬ÆÄ²Æ¾±ÄÂ°ÆÂ®ÇÅ°ÅÁ³ÃÃ°ÈÄ®ÅÁ°ÆÃ°ÇÄ°ÈÀ®ÄÃ²ÆÃ´ÆÃ³ÆÀ±ÆÃ®ÄÃ³ÈÅ²ÈÆ³ÉÄ¯ÈÃµÉÆ²ËÂ²ÆÃ³ÆÆ²ËÅ±ÉÆ´ÊÃ¯ÊÃ¯ÉÆ±ÊÂ®ÇÆ®ÈÆ·ÈÆ³ÊÇ³ÈÄµÊÃ³ÈÇ³ÊÆ°ÇÂ²ÊÅµÊÃ¶ÊÆ´ÌÆ´ÎÆ´ÉÈ³ËÇ³ÉÇ³ÊÆ¶ËÇ´ÌÅ¶ËÅ´ÊÉ´ÊÈ³ÌÆµÉÈ³ÌÉ³ÊÆ³ÌÇ³ÉÇ´ÎÈ´ËÇ²ÎÊ±ÏÉ³ÌÉ¶ÍÊ¶ÏÇ³ÌÇ³ÊÊ¸ÎÈµÌÈµÍÌµÐÉ·ÍÌµÎÈ¶ÐÊ¸ÏÊ¶ÐÊ¶ÑÊ·ÍÆ¸ÍÌ¹ÌÉ·ÏÉ´ÏÉ¶ÐË¹ÎÈ·ÍÌ¹ÐÌµÎÌ·ÎÈ¹ÏÍ¶ÍË´ÎÍºÎË´ÐÊ¼ÐË·ÎÍ¶ÐÍ»ÏÌ¹ÐÊ·ÐÍ¸ÒÎºÒÌ·ÎÊºÏÏ¹ÒÍ·ÍÈ¹ÑÎ»ÎÍ¶ÐÏ¸ÒÌ¸ÐÎ¹ÐÍ¹ÐÌ¹ÐÌµÏÎ·ÓÐ·ÒÎºÐÎ»ÒÌ½ÓÐ»ÐÏºÕÍºÓÍ·ÒÎ¹ÐÌ»ÐÐ»ÑÐ·ÕÒµÒÌºÐÍ·ÓÍ¹ÒÑ¼ÒÎºÒÎ¸ÐÎ¼ÔÎ¸ÑÐ»ÒÐºÓÎ¾ÒÐºÕÏ»ÓÌ»ÒÑ»ÕÎ¾ÕÒÁÓÎ»ÒÐ¾ÒÐ¼ÒÒ¹ÒÎ¼ÔÐ½ÓÑ¾ÕÓ»ÔÐ¼ÕÏºÓÑ¿ÒÑ½ÕÒ¾ÓÓ½ÕÐ½ÒÒ½ÕÐ»ÒÒÀÓÓ¾ÖÓ¾ÙÒ¾ÖÑ½ÔÕ»ÕÔ¼ÔÓÀÕÓ»ØÒ¾ÒÔ¾ÖÒ»ÖÔÁ×ÔÀÔÒ¼ÓÓ¿ÒÒ¼ÕÔ¼ØÕ¿×Ò¼ÖÔ½ÕÒ¾ÖÑ¿ÒÒ¼ÒÑ¸Ì»¤¾©ftbzf~ililwu|¢¬¯¡³¤¶¨Á®ÅµÆ¡³Ì´Ç´É³Ì¡·Õ ¼Ò£»Ö¨¼Ù¨ÁíµÆøÁÓúÆÚúÏÝúÕáúÓåúÕæúÙèúÚîúÝðúàòúâóúæôúêöúèøúç÷úé÷úèúúåùúç÷úè÷úçùúçúúéúúãúúëúúæúúíúúìúúíúúëúúíúúîúúïúúñúúñúúðúúñúúïúúñúúóúúòúúõúúòúúóúúóúúóúúóúúôúúôúúõúúóúúôúúøúúúúúúúúúúúúúúúúúúúúúúúúúúúúúúúúúúúúúúúúúúúúúúúúúúúúúúúúúúúúúúúúúúúúúúúúúúúúúúúúúúúúúúúúúúúú÷úúõúúóúúòúúðúúíúúïúúñúúïúúìúúèúúêúúéúúéúúéøúäúúèúúéøúçöúãöúäöúæöúßôúáóúàóúßòúÜðúØïú×ïúØêúÖíúØêúØëú×ëúÓéúÓèúÔçúÐèúÐäúÏâúÍßúÈàúÊßúËÜúÇÙúÈÛúÂÕúÊÕúÅÕúÄÓú¿Ñõ»Ëï³Êê³Ãâ¬½Ü¨»Õ§·Ð¤µÈ±Ç¯Á¬¼¨·ª¶¥¬¢¢{ttqifzdwb|r_~fUwg]uoYtiWxi[|r`|¿®¶Î½ÈÕÀÓÕÁÒÓÀÒÒ¿ÖÔÀÓÕ¼ÓÕÂÕÕÂÕÕÁÖÖÁÖÓÁÖÓÁÔÓ¼ÖÔÁÕÒÃÖÒ¼ÔÔÀÕÓ½ÒÒ¾ÕÒ¿ÓÑÁÔÐ½ÕÒ¼ÒÔ¼ÑÐ¾ÓÓ½ÕÐ¾ÒÑ¾ÐÒ¾ÑÓÁÒÎ¿ÓÐ»ÒÐ¾ÒÐ»ÓÎºÐÎ»ÎÌ¼ÒÑ»ÐÐºÒË¼ÏÒ¼ÏÎ»ÑÎ½ÕÎ»ÑÎ»ÑÎ¹ÎÎ»ÎÌ»ÐÐ¸ÒÎ¼ÒÎ¹ÑÌ»ÐÌ»ÒÐ¹ÒÍ»ÐÌ¼ÎÎ»ÐÌ¸ÎÌ¹ÐÏ·ÎË¹ÌÌ»ÐË¹ÌË·ÏÍºËÍºÐË·ÌÊ¼ÊÌµÑË»ÍÊ¹ÌÊ·ÎÊ·ËÇ»ÍÊ¸ÌÉ·ÊÈ·ÊÊ¹ÌË·ÎÈ´ÏÉ¸ÌÌ·ÌÇ·ÌÌ·ÎÊ¸ÍÊ¸ÈÅ³ÍÈ´ÌÈ·ÌÊ¸ÎÇ´ÉÅµËÈ¹ÉÉµÍÈ·ÉÅ´ÊÊ³ÌÈ³ÊÆ·ÊÆ²ÈÉ´ÉÆ·ÈÅ·ÈÇ³ÊÇ´ÊÅ¸ËÅ³ÊÅ¸ÈÅµÈÈ³ÈÆ±ÈÅ·ÉÅ³ÊÈ´ÈÄµÈÈ°ÆÆµÈÆ¸ÊÅµÉÃ³ÆÆµÇÅ¶ÈÂ±ÊÃ´ÈÁ³ÇÊ³ÈÁ³ÈÃ²ÆÆ¯ÆÃ³ÃÃ´ÇÂ²ÅÄ²ÈÄ°ÊÂ¯ÆÅ´ÈÀ¯ÅÄ³ÈÃ³ÃÁ³ÆÂ²ÅÁ³ÃÂ±ÂÂ°ÆÅ³ÆÂ±ÆÂ²ÇÁ­Ä¿²ÅÃ®ÆÁ°Å¿¯ÄÂ¯ÃÀ¬Ä¿±ÃÁ²ÅÃ¬Å¿²Á¾®Ã¾¬Ã¾¯ÂÀ®È¿¬ÄÀ°Ã¿²ÄÂ¯Ã¾®Â½­Å¿³Æ¼¯Ã¾®Á¾°Ã¾ªÄ¿±ÁÀ®Ã¿¯¿¾±Â¾¬Å¾©À¼¬¿¾®À¿­¾»­Á»¨¾¿®¿½¬Á»¬Á½§¿»¬Á»¬¿¿ªÂ¼«¾¼«¼»«Á¼¬¼º¨»¾¬¿¹©¿·«½¹©Áº«À¹­¾»ª¼°¤·´§¸¸¤»»§»·§ºº§º¸ª¾»¨¹·«»¸¦»¸¨¾¹§¾º©»·¦¾¸ª¼»¦¾º«»»§»º¦¾º«½»¬½»¥¾»¦¾¹«¿»©À»«½¹§»¸¬¾¼§¾½¦¾»¨¼»©Á»¬»ºª¿º¬Á¼¬½ºª¾»©¾¼¬½º¨À¸§¾¾§Á¼«¿¾«¾½®Á½¬Á»­À¾«ÁÀ¯Á¾®Ãº¬Â½¬¾¾«Á¾ªÁ¿«ÁÁ¬¾Á¬Ã¾®À¾ªÁÁ®Ã»¬Á½­Â¾¯ÄÀ®¾¾®ÅÀ©Ã¾°ÁÂ°¿À¬ÂÂ«ÃÀ©¿¾®ÁÀ®Ç¾¯ÂÁ¬ÄÁ¬ÃÁ­Ã¾®ÃÃ¬Ä¾¬ÃÁ®Ä¿¬ÃÀ¬ÁÀ®ÆÁ±Æ¾«ÆÃ®ÅÂ®Æ¿¬ÅÂ²ÃÂ¯ÄÁ«Ä¿¯ÃÀ±ÆÃ¯ÇÁ¯ÆÃ³ÅÁ®ÄÁ°ÆÁ®ÈÄ®ÆÃ¯ÈÁ²ÃÃ²ÆÁ²ÆÆ²ÄÅ®ÆÃ³ÇÃ°ÅÅ°ÆÁ³ÈÃ³ÊÅ°ÆÂ±ÆÄ³ÆÃ«ÈÁ°ÇÃ¯ÇÄ³ÈÆ±ÈÄ³ÇÆ´ÈÇ³ÍÅ³ÈÅ³ÈÆ¶ÆÃ³ÉÇ²ÈÆ´ËÆ²ÈÅµÉÈ®ÊÆ³ÇÄ³ÊÅ³ÈÈ³ÇÅ·ËÈ´ÈÅ´ÈÈ´ËÆµÊÅ´ÊÈµËÇµÌÈ´ÊÄ²ÉÆ´ÈÉ´ÌÃ´ÊÅµÎÈ¶ÊÊ¶ÉÈ´ÊÊµÊÉ·ËÅ´ÈÈµËÊ³ÈÈ¶ÊÆ¶ËÊ·ËÇ¸ÊÉ³ÌÌ³ÌÈºÎË·ËÈ¸ÏÊ¸ÌÊ·ÏÊµÊÇ·ÊÌ¹ÌÌ·ÎÊ·ÎÉ·ÌÊ·ÎÊ¸ÌË³ÍÉµÌÊ¸ÍË¼ÌÊ·ÎÍ¸ÌÊ·ÎÊ¸ÎÊ·ÌÊ·ÍÊ·ÊÍ·ÌÊ¹ÊÊ¶ÌÌ¶ÌÉ¸ÍÊ¶ÑÊ·ÎÊ¸ÌË»ÎÌºÎÊ·ÊÊ»ÏÏ·ÎÌ»ËÎ¸ÎÎ¸ÌÎ»ÐÌ¹ÌÎ·ÌË¹ÏÎ»ÐÎ·ÐÊ·ÊÍ»ÎÎºÑÌ¹ÐÊ¹ÍÐ¸ÐÍ¼ÏÌ½ÎÌ·ÏÎ»ÏÌ»ÏÏ»ÐÍ¼ÐÐ½ÎÎ»ÑÐ¸ÒÌ¸ÏË»ÎÎ½ÏÌ¸ÐÐ»ÐÐ¾ÐÏ¹ÎÐ¾ÐÎºÒÎºÑÒ¾ÒÑ»ÑÐºÏÌ½ÎÈ³Å±¶zzdn[q`zw]{tY~|g|kkwu|¢~­®·§²§Á¬Æ¬Ä¬Ã®Á±Ë±Î·Ï¡·Ò¡»Ù¬Àî¸ÇöÂÏúÇÒúÊØúÑÜúÎÜúÕãúÖâúÕäúÙêúÝíúàðúâòúäòúâóúâõúãôúãõúãõúçöúâõúáöúä÷úäõúâ÷úãöúçøúçøúéúúèúúèúúçúúìúúìúúîúúðúúíúúëúúïúúñúúðúúîúúñúúïúúñúúïúúîúúðúúôúúñúúïúúôúúõúúõúú÷úúúúúøúúúúúúúúúúúúúúúúúúúúúúúúúúúúúúúúúúúúúúúúúúúúúúúúúúúúúúúúúúúúúúúúúúúúúúúúúúúúú÷úúöúúóúúóúúòúúðúúêúúêúúëúúìúúìúúêúúçúúæ÷úåøúâøúãôúäöúã÷úäõúäöúáöúàóúÜðúÛñúÙðúÙïúÙìúÛìúØêúÔêúÓæúÖåúÒæúÒæúÐâúÓæúÒåúÐáúÐãúÐãúÌÞúÈßúÊÜúÌÛúÄÚúÃÓúÃÒúÄÔúÃÒúÄÎúÃÎö»ÌõºÆì´Âä¬¾Ýª¹Ø¥µÓ£­É«Ç¬¼§¼¦¸ ¯£¯¤xxtni|f|`xu]|lYqgUtiOndIkbKnfOldUqn_{x·¨²ÈºÀÏºÊÏ¾ÌÒ»ÏÐºÐÎ»ÏÐ¾ÎÐ¾ÐÓ»ÎÒ¼ÏÑÁÒÖ¼ÓÐ¿ÑÒ¾ÑÎ¾ÒÏ¿ÒÍÀÑÑ¿ÏÌ»ÐÎ»ÐÎ»ÏÍ»ÎÍ»ÌÎ»ÏÌ¸ÍÌ»ÐÌ¾ÏÌ»ÌÎºÎÊ»ÎÌ¸ËÌ»ÐÌ¸ÎÍ·ÌÌ¸ÊÌ¸ÎÊ¹ÊÈºÌÊ·ÌÊ·ÌÉ¹ËÌ·ÎÎºÎÈ·ÎÍºÌÊ´ÌÇ¶ÊÊ»ÌÊ¶ÎÊ¶ËÊ·ÈË·ÎÊ¸ÌÈ¶ÈÊ¸ÊÊ³ÈÆ¹ÉÊ¶ÊÈµÇÉ·ÊÉ¶ÈÈµÊÉ·ÈÊ¸ÊÉ³ÈÇ·ÊÈµÉÈµÆÈ±ÌÅ´ÈÈ´ÉÈ·ÈÃ³ÈÅ¶ÇÇ³ÇÇ·ÆÄ³ÇÆµÃÃ³ÇÆ³ÇÂ²ÄÃ´ÈÆ³ÈÈ¶ÊÃ´ÉÆµÈÆµÇÂ²ÈÄ³ÅÆ²ÄÆ²ÇÆ´ÄÆ³ÆÃ²ÃÂ´ÆÃ±ÆÃ°ÆÂ¯ÄÁ³ÅÂ´Æ¿³ÂÅ±ÄÁ¯ÄÆ°ÅÄ²ÆÃ²ÄÀ²ÆÄ¯ÄÃ°ÂÃ±ÅÃ³ÃÃ²ÆÃ¯Ã¿±ÄÁ°Ä¿°ÂÀ°ÆÃ­ÆÁ®ÄÀ¯ÄÀ¬Ã¿¯ÂÀ®ÂÁ¬ÁÁ­Ã¾®ÂÂ®ÃÁ³Á¿¯Â¿¬Á¿®ÃÁ¯ÁÁ¬À½¬Ã¾«¿Á±ÃÀ¯Â¾®Â¾¬ÁÁ«Â¿°À¾¬ÃÁ¯¾¼®ÀÁ®Á½­Ã½¬¾¾®¾½«À¼¬À¼¬¾¾±À¾¬¿½¬¼¾©¿»¬À¼¬½¾®¿»ªÀ»«¼º­¿»ªÁ¾«¾»®Àº¬À¼¬»¸®¾½¬Ã¸«¼º©¿¸¬Á¾«ºº¬¾»©»·©¼»¬Á¼ª»º¨½¹¨»¸©»»©½¸¨º·§½¸©»¸ª½·¨»¹£¼º©»¹§»¹©º¸ª»¸§¸¹¦½·¨º·§¸¸§¸¹¦··¥»µ¥º¸¤·¹§º·¦¸³¦·¶©·µ¨º»«¾½ªÁ¾©Á»©ÁÁ¬Ã¼¬Â¿ª½¾°Á¿ª¿¾¬Âº¬ÁÁ©½¾¨Â»®ÂÂ¨ÃÀ¬Â¾®Ã¿«Ã¾­Ã¾«¾Á­ÂÁ¬Å¼¬Â¾¬ÃÂ­Ã½­ÂÀ¬ÃÀ¦Á¿¬Â¾«ÃÁ­ÅÁ®ÁÁ¬Å¿­Ç¾¬Ä¿­Ä¿®ÆÁ­ÃÁ¬ÃÁ¬ÃÁ±ÅÁ³ÄÂ³Á¿®ÆÁ¬ÇÂ±ÆÂ¯Â¿²ÈÁ°ÇÃ²ÅÁ¯ÆÄ´ÆÇ°ÆÂ±ÆÁ®ÃÄ®ÈÃ³ÄÃ³ÄÅ¬ÇÀ°ÅÃ³ÆÄ­ÈÂ±ÆÃ´ÈÃ±ÉÁ®ÇÆ¯ÆÂ¯ÇÆ°ÈÃ²ÅÃ±ÊÉ°ÇÄ±ÇÆ°ÊÃ³ÇÁ²ÈÃ¯ÉÆ®ÈÈ²ÊÅ²ÈÆ®ÉÄµÊÆ³ÈÄ®ÊÄ´ËÄ³ÊÃ­ÉÅ°ÊÇ±ÈÆ´ËÅ¯ÉÄ±ËÅ¯ÊÊ´ÊÅ³ÌÊ²ËÅ³ÍÈµÈÆ³ÌÆ³ÌÈµÊÈ³ÊÆ³ÌÇ¶ÆÉ¶ÌË´ÐÄ´ÈÆ³ÍÉ´ÌÅ´ÎÅ¶ÌÈ®ÊÆµÌÉ¶ÌÈ´ËÈ¶ÈÉ·ÌÈµÎÉ¶ÍÊ´ËË·ÎÌ¶ÎÊ¸ÎË·ÎÊ·ÐËºÎÉ´ÎË¸ÌÍ¶ÌÈ¸ÐÉ³ËÈ´ÐÌµÌÊ·ÐÉ¹ÐÊ¼ÐË·ÎÊµÐÊ·ÎÊ»ÐÎ»ÏÎ·ÐÉµÑÊ¸ÏÉ¶ÓÍºÐÎ·ÐÉ¹ÌÍºÒÊ¹ÒÎ¸ÐÌ»ÐÍ»ÎÎ»ÐÍ¹ÏÌ¶ÏÉ¶ÒË»ÐÎºÓÌ·ÏÍ¼ÐÍºÐÉ¹ÌÍ·ÑÏºÑÎºÒË¹ÐÐ¾ÕÍ¸ÏÌºÑË»ÎÐ»ÎÍ»ÑÎ»ÒÎ¼ÒÌ»ÎÐ»ÒÑ»ÐÎ½ÐÎ¹ÒÐºÒÍ¼ÐÒ»ÒÎºÒÎ»ÒÒ¾ÔÎ¸ÐÐ»ÒÍ»ÒÐ»ÐÎºÒÌ»ÓÏ¹ÓÐ¼ÖÏ¹ÒÐ¶ÐÍ»ØÎ»ÏÎ¹ÑÒ»ÖÔ¿ÓÓ¿ÒÒÁÔÎ¹ÓÎ»ÕÓ»ÒÒ¾ÓÐ¾ÕÐºÔÑ¼ÓÓ¿ÕÒ¹ÕÖÀÕÏ»ÔÕº×Ï¼ÕÓ¿ÒÔ¿ÕÒ¼ÕÐ½ÓÔ¾×Ò¼ÖÒ¾ÕÕ¾ÕÔÀ×Ò¼ÕÒ¾ÕÕ¼ÔÒ¾ÒÒÁÕÒ¾ÒÑ»ÓÔ¿ÓÖ¿ÖÑ¾ÓÓ½ÓÕ¿ÒÓÀÔÕ¾ÒÌ¶Ìµ¤¼¨ix`wbwbw`ortt¤« ¬¥º¥½¬»«Æ±Ë³ÆµÄ´È³Ì¶Ò¤¹Ó¦»Ú©¾ã´Åï»ÉöÂÒúÈ×úÍÝúÓâúÓãúÕçúÙèúÝìúßðúâïúäóúçôúåôúä÷úãõúçöúéùúèùúêùúéúúéúúèùúçúúçúúéúúëúúëúúëúúíúúïúúíúúðúúïúúñúúïúúðúúïúúòúúôúúöúúóúúôúúôúúöúúõúúôúú÷úú÷úú÷úúöúúøúúùúúúúúúúúúúúùúúúúúúúúúúúúúúúúúúúúúúúúúúúúúúúúúúúúúúúúúúúúúúúúúúúúúúúúúúúúúúúúúúúúúúúúúúúúúúúúøúúöúúöúúóúúòúúïúúñúúíúúïúúïúúòúúîúúëúúêúúêúúçúúæøúæöúèøúèùúæùúãöúâöúàõúÜòúÛòúÛóúàðúÝðúÜñúÛîúÝìúÚîúÕêúÓêúÖèúÔèúÒäúÔèúÓåúÎåúÐäúËàúÌáúÌàúÉÜúÉÚúÉÚúÈÖúÆÕúÅÒ÷¼Îö½Êï¶Æë°Äá¬»Ü§»×¡¹Ï¯É­¾¬Á§¿ª³¨¬ «¢¦z|rlggwbwbxx`o_zkUqgYznUwk[zrfu±²È¹ÁÒ¿ÍÓ¿ÒÓÀÒÔÁÓÓ½ÕÕÁÖÓ¾ÕÔ»ÕÖÁÕÕ¾ÕÓ¾ÓÕ¾ÖÔÁÒÖ¿ÓÒÁÔÒ¾ÓÕ»ÖÓÁÕÑÀÓÕ¼ÒÔ½ÕÒ½ÑÒ¾ÕÒ»ÏÓ½ÔÕÀÕÐºÎÒ½ÒÐ¿ÒÐ¾ÐÐ»ÒÐ»ÓÐ¾ÐÎ½ÑÎ·ÐÐ¼ÐÌ¼ÏÑ»ÒÍºÎÌºÍÐ¼ÑÓ¼ÐÐ»ÑÑ¾ÒÐºÕÍ¼ÐÍ¾ÐÎ¼ÎÐºÑÐ½ÏÎºÐÐ»ÒÐ¼ÐÎ¼ÑÎ»ÍÌ¸ÎÒ»ÒÏ»ÎÏ¹ÍÌ»ÒÎ·ÏË¹ÌÍ·ÍÎ»ÐÍ»ÌË¶ÏÍ¶ÎÊºËË¹ÌËµÏÊ·ËËºÌÌ¹ÍË¹ÌÌ¹ÎÈ³ÌÊ·ÈÈ·ÌÉ·ÌÊ·ÊÈºÌÊ¶ÍÊ´ÌÈ·ËÈ·ÐË·ÊÈ¶ÊËµÌÈ¶ÇÈ¶ÎÇµÈÈ·ÌÊ¶ÊÊ¸ÊÉ³ÌÆ³ÊÉµÌÈ´ËÈµËÆ¸ÈÉ·ÊÊµÊÇ¶ËÈµÌÇ·ÉÈµÊÊ·ÈÆ³ÈÇ·ËÇ·ËÆ³ÈÄ³ÈÉµÇÃµÈÅ³ÉÆµÈÇ±ËÆ³ÈÆ¶ÊÆ´ËÄ±ÈÇ²ÇÅ´ÇÆ°ÈÆ³ÊÅ¶ÈÁµÈÆ³ÆÆ³ÆÆ³ÃÃ±ÆÃ³ÄÁ¯ÅÃ³ÆÃ±ÂÃ¯ÇÂ³ÇÃµÈÃ­ÉÂ²ÅÃ³ÆÂ¯ÂÂ³ÆÁ¯ÇÅ±ÅÁ²ÄÁ±ÆÄ­ÃÂ²ÅÃ²ÄÁ¯ÂÁ®ÄÁ°ÄÁ®ÃÀ®ÃÁ®ÆÃ±ÅÀ®Ã¿¯Á¿°ÃÃ¯Â¾¯ÄÁ¯ÆÀ¯ÅÂ®À¾®ÁÁ¯ÅÁ¯À¿±ÁÀ¬ÃÀ¯À½­ÃÁ®Â¾­À½¬ÁÀ¬ÁÀ±ÁÀ¬Â¾«Â¾±¿¾¬ÃÁªÁ¾ªÀ¼¬Á¾«Â½¬Á¼¯¾À­Â¼§Á»¬¾¾¬À¹©À¼­½º¬À¾ªÀ·¨»»¬½º«Á»ª½»«¼¹¦¾»¦½»ª¾³£¶·£»·¥¹¹£½º¢¹·«¼º¥»»¨½µ¦»»§»¶¨ºº©»¹¨¼»¤»¹©»»¨¼»§»»¬½¹§½·©½¸¦¾»©¾¸©¼¾«¾½¬¾¸«¾»¨½¸§»¿ªÀ»¨½»«¼½¨½½¨Àº­¼»«¿»ª¼¼©À»§Áº«»½¬½»®¾»«Â¼«¿¾¬½»«¿½­Â¼¬½½¬Á¿¬À»«¿¾«¾¼ªÃ½®Á¾¬À¾¬Á¾¯Â¾«Á½¬¿½¬¾À¬ÆÀ¬Á¼®¾½¬¾Á­Ä¾­ÁÁ¬Á¿¬ÁÁ®Â½¬ÂÁ­ÂÁ¬ÁÀ¯Ã¾¯Ã¾­À»¬ÅÃ®Ä¾­ÃÃ¬Á¾«ÄÁ¬ÁÀ®ÄÁ­ÃÁ¬ÂÁ°Ç¿­ÃÀ®ÄÀ°ÄÁ¯ÆÁ²ÃÁ®ÃÃ°ÅÁ«Ç¿³ÇÁ²ÄÃ¯ÇÂ­ÄÄ³ÆÃ±ÇÂ¯ÆÄ³ÈÆ±ÈÃ²ÆÄ®ÆÆ°ÈÃ±ÄÃ²ÄÄ±ÅÂ°ÇÂ±ÄÃ²ÇÆ®ÆÄ²ÆÄ°ÈÄ²ÄÅ¯ÇÄ³ÇÄ²ÅÄ²ÊÃ±ÄÆ³ÊÆ³ÈÃ³ÈÃ²ÇÈµÊÃµÈÄ²ÈÈ²ÊÆ´ÌÊ´ÌÆ¯ÈÆ³ÇÇ±ÊÄ³ÈÆ²ÇÈ²ÆÆ´ÉÆ±ÈÄ³ÉÆ²ËÈ²ÌÈ¹ÉÈ³ÊÆ²ÇË¶ÇÆ³ËÆ·ÇÊ³ÊÇ´ÉÄ³ËÆµÉÇ¶ÌÊ³ÌÇ·ÈÆµÌÆ´ÊÇ´ËÇ³ÊÉ´ÍÈ±ËÉµÍÈ²ÌÊµÊÈ·ÌÈ·ËË·ÊÈµÌÉ³ÌÌ·ÊÈ¸ÊÌ·ÎÊ¶ÎÊµÎËµÌÆ³ÎÇ¹ÊÈ¸ÎÊ³ÌÊ¸ÍÉ¸ÎÊ·ÌË·ÎÉ´ÎÊ·ËÌºÎÊ¸ÌÊ´ËÇºÌÊ·ÎÌ·ËÈ¶ÎË»ÍÌ¹ÒÌºÎÈµÌË·ÎÈ·ÎÎºÒÌ¶ÎËºÎÉ¸ÏÌ·ÐÊ¸ÐÎºÍÌ¸ÒÌºÎË·ÎÎºÐÎ¹ÒÎ¸ÎÌ·ÐÎ·ÒÌ¹ÏÎ»ÎÏ¸ÎÎ¹ÏÏ¸ÐÌºÐÌ»ÎÍ»ÑÑ»ÏÐ·ÎÌ»ÒÑ»ÐÐ½ÏÎ½ÎÒ¸ÏÑºÒÌ½ÎÒºÒÍºÎÎ»ÍÍ¹ÎÏ¹ÒË¾ÎÐºÐÑ»ÐÐ»ÎÐ¾ÒÐ»ÐÏ»ÌÊµÇ»¸¢zgqUqY{nYwtWzzd~k~qwu ­´£·£¸©ÅªÂ®¼¬Ã°Ä¯Æ±Æ±Ì¶Ö£¸à¬¿çµÆö¾ÊúÂÓúÈØúÊÛúÎßúÓàúÖäúØçúØêúÜìúßêúßïúâóúåóúãõúâöúçöúæ÷úä÷úå÷úâ÷úæøúäøúãöúé÷úæ÷úêùúçúúéøúìúúíúúíúúìúúîúúíúúïúúîúúïúúïúúóúúóúúõúúôúúòúúòúúôúúñúúòúúöúú÷úú÷úúùúú÷úúúúúøúúùúúúúúúúúúúúúúúúúúúúúúúúúúúúúúúúúúúúúúúúúúúúúúúúúúúúúúúúúúúúúúúúúúúúúúúúúúúúúúúúúùúúõúúñúúðúúðúúïúúïúúîúúíúúîúúñúúéúúëùúèøúå÷úä÷úåöúßöúàöúâòúáôúàõúÞðúÞòúØòúÛíúÕîúØìúÙîúØêúÙëúÖèúÖéúÑéúÓæúÕæúÏâúÐàúÎáúÏäúËßúÉßúÉÛúÊÛúÌÛúÁÖúÁÓúÄÒúÂÐøÀÎù¿Îö¹Èî¸Ãë²¾ã®¼Ý¨¸×£´Ó¢³Ë­Ä§¼¥³¡´²«¤ {tqgfg|t_~o]wo]ukYr`MlbQkbQqgUrk_xo²ªÅµ¹Î¼ËÌ»ÉÎ¾ÍÏºÎÏ½ÐÍ¹ÎÒ½ÐÐ»ÐÏ¾ÎÐ½ÐÎ¾ÑÐ»ÐÐÀÎÒ³ÏÏ½ÑÏ½ÐÎ¹ÎÐ¸ÏÐ¼ÐÎ»ÐÎºÑÍºÌË¼ÏÐºÐË¹ÌË·ÌÎ¶ÎÍ¸ÌÌºËÌºÐÈ¸ÌÌ»ÌÌ¶ÌË»ÌÍ¼ËÊ·ÍÎ¸ÌË¼ÈÊºÌÌ·ËÊ¸ÊÌºËÌ¹ËÊºÉÌµÊÊ³ÈÊ¸ËÉ·ÌÊ¸ÈÈ¸ËÌ¸ÌË·ËÊ¹ËÇºËÈ·ÌÊ·ËË·ÊÉµÍÊ¸ÍË¸ËÌ·ÊÊ·ÈÊ¸ÇÈµÈÊ´ËÉ³ÉÆ³ÈÆ±ÉÆ³ÇÇ³ÆÇ³ÉÆ·ÇÃ²ÆÄ³ÆÈ²ÆÄ·ÇÆ´ÄÃ²ÆÆ³ÅÄ²ÈÃ±ÇÆ³ÆÆ²ÆÃ²ÇÇ²ÆÅ³ÇÅ´ÈÅ³ÆÄ³ÇÁ³ÃÅ±ÈÆµÆÆ±ÃÃ²ÇÃµÆÅ±ÅÄ·ÇÃ²ÃÄ´ÅÃ°ÃÃ²ÆÃ°ÃÄ²ÄÃ³ÆÁ®ÄÁ³ÂÂ°ÄÂ¯ÂÃ°ÃÂ±ÁÃ±ÃÁ¯ÃÁ°ÁÂ¬ÆÃ°ÄÃ³ÂÃ¯Ã½°ÄÁ²ÁÃ®ÂÁ±Á¿°ÃÁ±ÃÁ°ÂÁ¯ÁÀ±ÄÂ­Å¿¯ÀÁ¯ÆÀ¬ÁÁ®À¾°ÀÀ¬Ã¼¬¿Á¯Á½®À¾¬À¾¬Á¾®Á¼¬¾À«À½°Á¾ª¾¾®Á»­Á¾¬Á¹­»¾«À»«¿º­½½¬À¿¬½¾¬¾»¬¾¾®Á½¬¾¾¬¾»«¿¾«¾¼¬»¼§¾º«¾¾°¿¼¬¾¼ª¼»¬¾¾«¾º§½»ª¼½¬¾»«»º©»¼«½»¬»·©»¶«»¹¨»»«º¹©»»¬¾»«½¹©¹¸¬º¹§¹¸©»¸©º·©¼·§»·©¼´§º»ª¸·©µº¤¸³¨¶·¥¸¶¥¹µ§º·§¸¸ª»·§¸´©¸¶¤¶¶§·³«½½¬Á»©¼¾©¿½«Á»¬ÁÀ¬À¼©¿»«¿½¬Ã¿«Á¼¬Á½®À¾ªÂ¼¬À»¬ÃÀ¨ÁÀ¯Á»¬Ã¾¬Á¿¬Ä¾¯Â¿­ÃÀ±¿½­Ã¾­Ã½®Ã¼­Ä¿¬Ã¾¬ÅÁ­Ã¿¬Â¾«ÈÁ­ÄÁ­Æ¿®Ã¾«ÃÁ¯ÃÄ²ÃÀ°ÃÁ¯ÄÁ­ÃÁ­ÅÃ±ÄÃ¬ÀÂ³ÆÃ±ÅÃ¯ÁÀ¬ÃÁ³ÃÃ°ÅÄ®ÈÂ³ÆÄ°ÄÂ°Ã¿³ÆÆ±ÈÅ®ÄÄ¯ÆÂ³É¿­ÆÆ¬ÇÂ²ÆÃ¯ÇÂ³ÄÃ±ÆÇ­È¿³ÆÈ²ÆÆ¯ÇÄ³ÈÃµÈÄ¬ÈÆ²ÆÄ³ÊÈ¯ÉÃ³ÈÄ®ÆÈ³ÊÂ¯ÆÃ³ÇÅ®ËÅ²ÉÅµÊÅ±ËÄ´ÊÆ°ÊÆ¯ÆÇ±ÊÅ´ÈÇ´ÉÆ°ÊÅ´ÈÆ·ËÈµËÆµÌÈ³ÊË³ÌÆ´ÌÆ³ÊÈ·ÊÇ³ÌÈ´ÊÊ²ÌÇ³ÎÈ´ÉÈµÍÈ¯ÏÇ³ÊÊ´ÌÇ¯ÌÈµËÈ³ÎÅ³ÍÆ³ÌÈµÌÈ´ÍÇ·ÌÈµÎÈ´ÍÆ´ËÉ¸ÍÎ´ÏÊ·ÍÉ·ÏÌµÐÈ¶ÎËºÐÉ³ÏÊ·ÐÍ»ÐÊ¹ÌÉ³ÍËµÌÈ³ÎÈ·ÍÈµÍÈ¶ÐÊ¸ÎÉ·ËÍºÎÌ·ÑÈ·ÍÌºÌË¸ÐË¹ÍÍ½ÐÍ·ÏÊ»ÏË¹ÌÏ¶ÐÊ¶ÏÊ·ÐÎ·ÍÊºÏÌµÍÌ¶ÎÏ¸ÒÌºÎÌ·ÒÌ·ÎÎ»ÒÎ»ÒÎºÔÌ¼ÑÐ¼ÒÐ¶ÒÐ»ÎÍ»ÑÍ»ÓÎ¸ÐÎ·ÐÒ¹ÓÌ¶ÐÎºÒÒ»ÓÍ»ÒÎ»ÑÏ»ÓÎ»ÓÐ½ÑÐ½ÕÐ¸ÒÐ»ÒÍºÔÎ¼ÒÏ½ÓÒºÑÐ¾ÕÑ»ÒÑ¿ÓÒ¹ÕÑ¼ÓÒ»ÓÏ¹ÔÐ¾ÖÐ¼ÒÎ¹ØÐ»ÒÎ½ÐÐ¹ÔÒ¼ÓÓÁÕÑ»ÕÎ½ÔÐ¾ÓÐ½ÒÏ¾ÓÐ»ÐÑ»ÕÒ¾ÕÑ¼ÔÒ¿ÒÐ»ÕÑÀÖÖ½ÖÒÁØÒÁÕÓ¾ÕÒ½ÕÓ½ÕÓ¾ÕÔ¾ÙÒÁÖÓÁÖÒÁÕÒ¾ÖÒ¼ÕÔ¾ÔÒÁÕÕÁÕÓ»×ÒºÖÑÁÖÕ»ÓÑ¼ÓÒ¾ÕÕ¾ÕÔÁÕÓ½ÒÎ½Ì¹¢¼©|iuYu`x]_loux ¨¬¶¤¹ªÂ°Ä¯Ã²Å³È°Ç´Ì³Ê¢´Ê·Í¹×¦¾ß°Áì²Èõ»ÎúÆÖúÉÛúÌÝúÑäú×çú×èúÛìúÜïúÜïúåóúäôúæ÷úéøúæúúèøúìúúçúúéùúéúúéùúêúúé÷úåúúéúúêúúíúúîúúíúúïúúïúúòúúñúúðúúïúúòúúóúúõúúõúúõúúøúúöúúöúúõúúöúúøúú÷úúöúú÷úúøúúúúúúúúúúúúúúúúúúúúúúúúúúúúúúúúúúúúúúúúúúúúúúúúúúúúúúúúúúúúúúúúúúúúúúúúúúúúúúúúúúúúúúúúúúúúúúúúúúúúúúúú÷úúöúúõúúóúúðúúôúúóúúðúúôúúñúúïúúíúúêúúãøúâ÷úåøúäøúèøúäöúäøúåõúáöúàöúàóúÛòúÙñúÜòúÛðúÛòúÙîúÛëúÖîúÙìúÙïúÙìúÕëúÕéúÍçúÍäúÍàúÌâúÍÞúÍàúÈßúÆÛúÅÕúÃÕúÃÑúÂÑöºÏó»ÈîµÈê­Âáª½Û¨¸Õ¢¶Ò±Æ¬¾¨·¨º¨»¥±£¬¡§£~uqil|g{`x]zoYxnWwgUtiW{lY|ti~{·²Ç³ÀÕ¿ÎÑ¾ÐÓ»ÐÑ¾ÑÕÁÕÔ¼ÖÓ¿ÑÕÀÒÖ¾ÒÓ¿ÕÖ»ÕÒÀÒÔÃÖÓ¼ÖÒÂÔÓ½ÕÒÁÖÓ¾ÓÐ¾ÓÓ½ÓÕÁÖÒÀÓÎ½ÒÐ»ÓÑÀÐÐ¿ÒÑºÓÎ»ÑÒ»ÐÐ¾ÓÎ»ÒÑ¾ÒÓ»ÒÓ¼ÑÒ¾ÒÎ¹ÓÎ½ÎÎ½ÎÐ»ÐÍ½ÐÎ¼ÐÎºÒÍºÐÎ»ÓÎ»ÐÎ½ÎÍµÐÎ¾ÐÎºÐÎ½ÑÍ»ÐÐ¹ÐÎ»ÒÏ½ÏÊ¸ÑÐ»ÐÎ½ÏÍ»ÐÐ»ÍÍºÎÍ·ÎÍ¶ÎËºÍÍ¶ÎÍ¸ÍË¸ÎÊµÌÌ·ÌË·ÎË·ÑË¹ÌË¹ÍÊ·ÎË´ÈÊ¶ÈÊ¹ÊË¸ÍÇµÌÊµÌÆ´ÊÉ·ÏÈºÍËµÌÈ·ÊÊ¹ÌË·ËÇ¶ËË¸ÍÊµÌÊ·ÎÇ¹ÊÈ·ÊÊ¶ÊÊ·ËÉ¹ÍÈ³ÊÆ¶ÌÉµÈÈµÌÈ³ÊË¶ÊÊ·ÊÉµÈÈ·ÈÆµÊÈ³ÈÅ³ËÆ³ÈÈ³ÆÇ¸ËÇ´ÈÆ³ÇÅ³ÉÇ³ÌÈ³ÈÃµÇÅ±ÈÆ³ÊÅ·ÇÈ±ÊÃ³ÈÆ³ÇÅ³ÇÆ±ÅÇ±ÈÁ¶ÈÅ²ÉÄ³ÇÃ´ÆÅ³ÆÆ²ÈÃ³ÅÉ±ÈÃ°ÆÂ²ÇÆ³ÅÂ³ÇÁ±ÆÃ°ÇÃ°ÆÂ°ÆÃ±ÃÀ¯ÂÀ¬Æ¿°ÆÂ®ÆÁ³ÃÂ°ÂÃ°ÃÂ°ÅÂ³ÆÁ«ÀÂ±Á¿®ÃÀ­Ã¾­ÄÁ¯ÃÀ¬ÆÁ°Á¿®ÃÀ¬Â¿®Å¾±Á¿°Â¿±ÂÁ®Â¾°Ã¿­Á½®Ã¿¯Â¿¬¿¿¬ÁÀ²Ã½«Å¾®¿À¬Ã¾±¿Á®Á¿²Ã½®Á¿¯À¾®¾¾ªÀ½¬¾¾­Á¾¬Á»­¼½­¾¾­Â½¬¿¹¬¾º©¾»¬¿»­¿¾ªÀ»¬»»©Á»©¿¼ª½¶¬»¼¬¾¹¥»¶¨»±¢²¹¦¸µ£·¸¨½¸§¼·¦·µ¨º»¦»¾©¼¸¦¼»¦½·¦¾¹¤¸º£¿·§¼¹¨»¹§½º¦½¹§º»ª½»©¾·§»¸©À¾©¼º¨¾¹§½º¥½»¨½»«À»¦½»©¼¼«¾¹ª¾¼§¿¹¥¿¼©¾»­¿»§¼½¬¾½©ÁºªÀ½¬¿º«¿¾¨À½ªÀº¬¿»«¾¾«Â¿­Àº«¾¿«¿¾¬Ä½°À¿­Á½«Á¿°Á½¬ÁÀ«Á¾¬Á¾¬ÁÁ­Ã¾¬Á¾¬ÁÁªÁÁ¬Á¼ªÀÁ«ÁÁ²Ã¾¬ÁÁ®Æ¾®Ã¾²ÃÀ¯ÃÃ¬Ã¿°Ã¿«ÃÀ±Á¾¬ÁÀ®ÃÃ®Æ¿­Á¾¬Ã¿ªÁÁ­ÃÃ¬ÃÂ­Æ¾°Ã¾¬ÂÁ°ÄÁ­ÅÀ®ÆÃ®ÆÁ¬ÆÃ²ÆÂ°ÅÃ°ÃÃ³ÈÃ®ÆÃ³ÄÃ®ÇÅ±ÆÅ¯ÉÃ¬ÇÃ³ÆÃ¯ÄÁ°ÄÃ³ÃÇ²ÆÂ²ÆÂµÃÃ¬ÆÃ±ÃÃ°ÆÄ²ÆÃ±ÈÄ¯ÆÃ²ÇÆ²ÊÆ³ÊÃ³ÊÇ°ÈÆ²ÇÃ±ÈÊ°ÊÅ³ÇÃ­ÇÄ±ÈÆ³ÉÅ¶ÉÈ³ÈÄ³ÇÆ´ÈÆ³ÌÆ³ÊÇ´ÊÆ°ÊÈ³ËÆ²ÉÆ¶ÊÉ²ÈÆ·ÊÇ±ÉÈ³ÊÈ´ÊÊ´ÈÄ³ÉÄ³ËÇ´ÊÈ³ÊÆ³ËÈ´ÉÇ·ÌÆµÆÇ·ËÇ±ÎÈ´ÊÈ¶ÌÇ´ÌÇ²ÌÈµËË³ÎÆ´ËÊµÌÊ´ÌÊ³ÊÈ¶ÊÊµÌÌ¹ÎÅ·ÌËµËÈµÍÈ·ÊÊ¹ÌË²ÌË·ÉÌ¸ÎÌµÍÈ·ÎÈ·ÊË»ÌÈ¸ÎÍ¶ËÊ·ÌÊ¶ÌÉµÌÊ¸ÒÈµÐÉ·ËÊ·ÎÊ·ÎÉ³ËÊ¸ÎÌ¸ÎÌ·ËÍ·ÎÌ·ÌÌ·ÌÌ»ÍÌ¶ÐÉ¹ÊÍºÌÌ¸ÌÌ¸ÌÎºÑÎ¹ÎÍ¸ÎÌ¸ÑÏ»ÐÍ¸ÎÌ·ÏÊ¸ÏÏ¶ÏÊ·ÏËºÐÌ»ÎÌ»ËÏ»ÐÎ¸ËÏ·ÑÎ¸ÐÍ·ÐÎ¸ÎÌ»ÒÏºÐÏ¹ÐÌ»ÎÏ½ÏÎ»ÎÎ¹ÎÐºÑÐ»ÏÎºÐÐ»ÏÍ¹ÏÏ·ÌÎ»ÑÐ»ÏÏ»ÎÎºÒÎ·ÊÌ·Ä°¸utYr[qYn[zz]xifkrw§±¸¤½¦¾©½­Ã¬¾¬Á°Ã®Ç®È°Ç²Ö¢·Ø§¹ä±Åí¶Çø½ÌúÆÔúËÙúÎÛúÓâú×ãúÕäúØéúÜëúÞïúàðúâòúâóúâöúãõúãöúäöúçøúãõúá÷úåùúä÷úãøúçùúçøúëúúéúúëúúìúúîúúíúúìúúìúúíúúîúúðúúïúúõúúõúúöúúõúúöúú÷úúöúúöúúöúúóúúöúú÷úú÷úúùúúúúúúúúúúúúúúúúúúúúúúúúúúúúúúúúúúúúúúúúúúúúúúúúúúúúúúúúúúúúúúúúúúúúúúúúúúúúúúúúúúúúúúúúúúúúúúúöúúöúúôúúñúúíúúîúúñúúîúúîúúðúúíúúìúúçøúäøúãùúãôúáóúäõúäôúãöúâóúÞõúßñúáóúÜïúÝíúÙíúÙíúÙëúÕëúÒéúÖéúÒéúÕçúÖèúÓçúÒèúÓäúÌãúÊáúËÜúÈÞúÈßúÄØúÂÖúÂÕúÀÒú¿Ñø»Ì÷»Éó»Êð³Äè®¿à¬¾Ü§ºÕ¡³Ò °Ë¬Ã¥·¢° ³² ¬ §¨¡ztkg{du]{r]wqYrfYqiSqdQk]QoiWol[z¸§²Êµ¾Í·ÊË»ËÎ»ÍÏ½ÐÏºÌÐ»ÌÐ»ÒÏ»ÐÑºÑÎ»ÏÐºÐÐ¹ÎÌ·ÌÐ½ÐÐ¾ÎÓ½ÐÌ»ÎÐ¸ÎÎ¸ÎÏºÎÐ»ÏÎºÎÌ»ÎÎ¹ÌÌ¸ÌÌ»ÌÌ¹ÌÍ¸ËÌ¸ÌÌ¹ÌÎ¶ÐÍ»ÌË¶ÊË·ËÌ·ÍÈ¹ÌÌ¹ÌÉ·ËÉ»ËÊºÌÌµÊÊ·ÌÌ·ÌË¸ËÈ·ÊË·ËËµÊÈ¹ÊÈ·ÊÊ·ÊÉ·ÌÇ¶ÌÈ·ÊÇ¶ÊÊµÉÈ¶ÊÌ»ÈÊºËÊµÈÊ·ÊË·ÇÈ³ÇÆ·ËÈµÌÆ´ÈÅµÆÊ³ÈÈ·ÌÄ²ÄÈµÇÈ´ÈÅµÉÇ³ÈÄ³ÆÄ°ÈÆ³ÆÆ³ÈÆ±ÇÃ´ÄÃ³ÆÅ²ÇÃ³ÇÈ´ÈÆµÆÈ´ÇÆ±ÄÅ³ÈÃ³ÃÆ±ÆÇ¯ÆÆ²ÂÅ¶ÇÈ²ÊÆ³ÄÅ´ÇÄ³ÅÁ®ÃÁ°ÅÄ²ÈÃ³ÃÂ²ÃÃ³ÈÂ±ÆÃ²ÄÂ±ÆÁ°ÂÁ³ÃÂ°ÃÃ±ÄÀ®ÁÃ­ÃÁ±Ä¾³ÄÀ±ÁÂ°ÃÁ°Â¾²ÂÁ­ÃÄ®ÄÁ³ÃÁ¯ÄÀ°ÃÁ®Ã¿°ÃÁ®Á½±ÂÀ²ÄÁ¯ÂÂ®ÁÁ°ÂÁ¬Ã¾¯ÂÁ±Â¾¬ÄÁ±Á¾¬ÁÁ«¾¾¬¾½­Á¾ªÁ¾­Á¼¬¾À®Á¼¬¾¼­Á¿¬ÀÁ­¿¾¬¾½ªÀ¾ªÀ»¬Á¾ª¾»¬Â¾¬¾»¬¾¼®¼»¬¿»¬½½©½¾¬½¼©¼¾¬»¾«À½«À½¬Á»©¾¼®¾ºª¾¸­¿¾¨»»«¾¼«ºº«¾º¬¾º«º¹¬½º©¾º©½¸¬¾»ª¾»¨¹µ«º»§»º©»º©»·§º»§»¸¨º·¦»¹¤¹·ª¸·§¹¸¦»·§··¦»µ¤º·§¸¶§µ·¨»´£¶²¥¶µ¨¹µ¥¸µ¬·¼ªÁ½«¾»¯Á¼¨¿¼°À¹ªÀ¿©¿½®¿¾¬ÁÀ«Á¹ªÁ½©ÀÀ®Á½¬Â½²Ã¼­¿¾¬Ã¾®Ã¾ªÁÁ¬ÅÁ­Á¿¬Å¾¬ÅÂ¬ÁÁ°ÁÁ¬ÃÁ­Æº®ÅÀ±ÀÂ¯ÁÀ°ÁÂ®Â¾¬Ã¿®Ä¾­ÃÀ¯Æ½°ÂÀ¯Æ¾¯Æ½­ÃÀ¯ÆÀ­ÄÂ­ÅÂ®ÆÀ³ÅÁ³ÄÁ°ÃÁ­ÇÁ¯ÃÃ²ÆÃ±ÈÃ°ÃÃ²ÆÁ²ÅÁ±ÃÃ³ÈÃ±ÈÄ®ÈÁ³ÈÁ°ÇÂ³ÇÁ³ÆÄ­ÈÂ²ÄÂ¶ÈÄ²ÈÂ³ÉÁ³ÆÃ³ÇÂµÈÅ²ÇÈµÈÄ°ÈÄ¶ÉÂ´ÈÃ³ÈÂµÊÅ³ÊÇ±ÊÅ´ÆÂ³ÆÂ±ÆÆ¬ÉÄ¶ÌÆ±ÉÃ³ÈÃ³ÈÆµÉÆ³ÌÅ²ÈÇµÊÆµËÅ·ÉÆ¶ÇÈ³ÊÆ·ÊÊ·ËÆ¶ËÇ¶ÈÈ³ËÉ¶ÊÈ¹ÌÆ·ÊÈ³ÊÇ´ÈÆºËÇµÊÄµÎÇ·ÍÈ´ÌÇ·ÉÈ´ÍÈ¸ÌÈ´ÐÆµÎÄ´ÌË¶ÍÇ¸ÌÆ¹ÊÊµÎÇ·ËÉ»ÌÊ³ÐÈ´ÊÊ·ÌÌµÎÉ·ÎÈ¹ÎÍµÎÈ¶ÎË¹ÌÈ·ÎÉ·ÎÍ¹ÐÊµÐÊ»ÐÉ·ÌÈ»ÑÎ¶ÐÊ¸ÐË»ÍÎºÎÉºÑË»ÎÍ·ÐÊºÎÊ¹ÏË¹ÐË·ÍÎ»ÑÍ·ÏÊºÎÊºÐÍ»ÒÐ»ÎÌ¼ÌÎ·ÒÍ¹ÎË»ÐÏ½ÒÍ¼ÐË»ÐÌ·ÏÍ¹ÑÌ»ÐÎ»ÒÎºÑÌ¼ÒÎ¹ÐÎ»ÒÎ¼ÒÏ¾ÐÏ¾ÑÏ¾ÑÌ»ÐÐ¸ÑÍ»ÒÏ½ÖÌ»ÒÌ¾ÓÐºÒÎºÓÍ½ÎÏ¼ÒÒ¾ÕÏ¼ÒÌ½ÐÐ»ÓÐ»ÑÎ¾ÓÍ¹ÒÏ¾ÓÎ½ÓÎ»ÒÐ¹ÑÍ¼ÕÐ½ÓÒ»×Î»ÑÐ¿ÐÑ»ÕÏ¿ÒÒ¿ÒÎ¼ÒÐ»ÐÑ¿ÖÐÀÑÐ¼ÒÐ¾ÒÐ¿ÕÐ»ÕÎ»ÓÒ»ÖÒ¼ÕÓ¼ÓÕ»ÕÑ¿ÕÎÄÖÒ¿ÕÐ½ÖÐ¿ÓÓÀÔÔÁ×ÐÀÔÓ¾ÕÓÀÙÓÀÕÐÁÕÕÁÕÓÇØÕ¿ÖÔ¾ÔÓ½ÔÓÁÕÕÁÖÑ½Ô×ÂÕÕÃÖÒ»ÍÊ·Æ¶º¢|i~gzf|flnquz ª±§µª½¯Â±¿±Á³Æ±Â²È³Ê¶Ê´É¸Î¤¹Ø¤½Ü§¿ç¶ÅóºÌúÈÕúÍÚúÐáúÒßúÕäúÙéúÛêúÜîúÞòúâòúéôúè÷úç÷úäöúèøúèøúëúúéúúêúúéúúëúúìúúëúúìúúëúúíúúñúúòúúðúúòúúñúúðúúðúúñúúóúúóúúöúúöúúøúúúúúúúúøúúúúúúúúúúúúúúúúúúúúúúúúúúúúúúúúúúúúúúúúúúúúúúúúúúúúúúúúúúúúúúúúúúúúúúúúúúúúúúúúúúúúúúúúúúúúúúúúúúúúúúúúúúúúúúúúúúúúúúúúúúúúúúúúøúúôúúòúúòúúóúúòúúòúúóúúòúúñúúîúúêúúëúúëøúèùúìúúëùúèùúéùúèùúçöúã÷úâõúáôúÜõúàòúÝñúÝñúÚðúÛïúÙíúÚïúÜîúØîúÜìúØëúÒéúÒåúÏäúÌßúÊâúÌÞúËßúÆÛú¿×úÁÕö¾ÑùÁÎö»ÎòµÉìµÃå¯Áß©½×¨¶Õ¦¶Ð¦³È®»ª¶§³°¡²¦¬©§¤zxnilit`zn`|o`wi[wdYwn[|wb³¬µË·ÆÐ¼ÍÎÁÐÕ¾ÒÓÁÓÓÁÓÖÃÕÐÁÕÒÁÒÖ¿ÖÓÁÔÓÁÓÓ¿ØÓ¿ÓÕÁÕÓÁÕÒÁÔÓ¾ÒÖ¾ÔÒ¾ÓÑÁÕÕÁ×Ó¾ÐÎÁÔÐ¼ÑÎ¾ÓÑÁÒÒ¾ÓÐ»ÎÐ¿ÔÑ½ÓÐ¾ÒÐ¿ÐÐ¿ÐÑ½ÒÒ¾ÍÏÀÒÒ»ÑÎ»ÎÏÀÎÍ½ÒÏ½ÐÍ»ÐÍ¼ÑÐ¼ÐÏÀÏÎºÑÌ¼ÎÌ¼ÐÍ»ÐÐ¾ÐÍÁÏÊºÐÎ¸ÐÌºÏÐºÏÌ¹ÎÑ»ÏÌ¹ÏÍ»ÌÌ»ÏÍ»ÐÌ»ÌÊ¹ÎÌ½ÑÌºÎÉºÌÌºÎËºËÊ¹ÍÊ¸ËÌ¶ÎÊ·ÍË¹ÌÌ·ÍÆ»ÍÈºÉÌºÌË¶ÌË»ÌÇ·ÊÌ·ÍÈ¼ÌÉ·ÊË·ËÊ·ÍËºÊÆµÉÆ¹ÈÉ»ÎÉ¶ÊÉ»ÊÆ·ËÈ·ÍÊ¹ËÉ¹ÊÈ¸ÌÉ¹ÊÈ¹ÊÆ·ÌÈ¶ÉÈ·ËÈ·ÊÈ¶ÈÅ³ÊÈ¶ÊÆ·ÊÅ·ÇÆµÈÆ¶ÊÄ·ÊÆ´ÈÅ·ÈÈ¶ÈÅ¶ÉÅ´ÉÂ·ÈÇµÈÃ´ÊÆµÉÄ³ÈÃ³ÉÊ³ÅÆµÈÄ´ÉÄ¯ÆÁ´ÆÇµÈÂ³ÅÃ´ÅÅ±ÈÄ³ÈÂ´ÄÂµÇÃ²ÆÃ³ÆÃ·ÄÁ¯ÆÅ³ÅÁ³ÃÃ³ÅÄ±ÄÃ³ÆÁ³ÄÅ³ÆÀµÅÄ³ÇÁ¯Â¿²ÄÁ±ÅÁ¯Ã¿±Å¾­Ä¾´ÃÂ±ÁÁ³ÃÁ®Ã¾°ÃÀ°ÄÀ®ÁÀ°ÃÀ°Â¾­Á¾³ÃÁ°Ä¿³ÃÁ°Ã¿±Â½°ÃÀ°ÂÀ±Á¾±ÇÁ°¿¿®ÂÁ±Â¾±Â¼®Â¿±Â¾±Å¾¯Ã¾¯Á¾®Ã¿°¿¾«Á¼«Á¾²Á¼®ÂÀ­À¼®¿¾®Â½¬Á»­½»©Á¾«Á¾°¾¿©¾»«½½«¾½¯»»«¾¸¬¿»«À»¨À¹¬»°¥³µ¥ºº¡º»©º·¤¼»¤½µ©¼¸ª¹·¦»º¦»º¤»·¦½¸¤¾¸¥»º¤»»ª½»¨½·¦½½¥»·«¼½§½¸©½»«½¸§¾½§½¼§½½§½»¨¾·ª¾»¥¾º§¿¸§¼»§¾¾ªÁ¸«½¾ª¾º¦¾¹©½»ªÀ¼«½½©¾½©¾º¬½½«À»¬¿»ªÁ½ª¾»¬À¾«Ã¾§¾»¬¿¿ªÁ½¬¿½¬À¾«ÁÁ«Á¿­Ä¼®Á½ªÀ¼«¾¿°Á¼¬Áº¬ÀÁ°Å¾«¿½¬¿Á¬ÂÁ«ÃÀ¬ÂÁ­ÁÀ¬ÃÁ¬ÁÁ²ÃÀ±Æ¾®ÁÁ¯Ã¿ªÂÁ¬Ã¾¬ÆÀ²ÃÂ¬Ã½®Â¾®ÅÁ®ÂÁ¯Ä½­ÃÂ°ÆÁ¬ÃÂ³ÆÃ®ÃÃ¯ÆÀ¯ÃÂ±Å¿®ÇÁ°ÆÆ±ÆÃ°ÈÄ³ÈÅ­ÄÃ®ÈÁ°ÆÇ°ÆÁ±ÅÄ±ÄÃ°ÅÃ­ÇÆ³ÇÄ¯ÇÆ¯ÇÃ²ÃÃ±ÇÃ³ÈÄ´ÆÃ°ÈÃ±ÉÃ®ÆÃ²ÇÃ°ÈÁ³ÇÃµÈÄ³ÈÄ°ÈÆ²ÇÄ²ÈÃ²ÈÄ°ÊÄ³ÉÆ°ÈÅ±ÈÇ´ÇÇ²ÆÈ¶ÊÈ³ÊÆ±ÈÉ¶ÊÆ´ÈÇ²ÆÄ³ÈÄ³ÈÈ²ÉÈ´ÊÆµÊÆ³ÌÅµËÆ³ÊÆ¯ÉÆ®ÆÇµÌÊ²ÌÈµÊÅ³ÉÈ¶ÌÈµÈÈ±ÈÊ´ÌÊ³ÈÈ²ÈÊ´ÌÈµÊÈ·ÈÈ²ÇÊµÍÄ²ÇÉ·ÊÊ³ÌÊ´ÊÊ¶ÊË·ÏÈ´ÉÈ³ÌÊµÎÊ¸ÍË¶ËÊ·ÍÌ³ËÈµËÌ·ÌÈ²ÌÊ¶ËÊ¹ÌÊ·ÍÇµËÊµÏÌ·ÑÈµÌÊ¶ÌË³ÍÎ·ÌËºÎÍ¸ÏÇ¹ËÍ·ÐÍ·ÒÉ¶ËÌ·ÌÊºËË·ÎÈ´ÌÊ³ÌÊ·ÌÌ¸ÎÌ¸ÎÌºÍÊ·ÌÐ¼ÏË¸ÏÊ¹ÏÏ»ÌÎ¸ÌÎºÍÌ¹ÎÐ·ÑÌ¸ÍÊºÌÌµÑÍ¹ÏÌºÐÌ»ÐÍ»ÏÍ»ÐÏ»ÏÌµÍËºÒÌ»ÏÑ¹ÐÌ·ÎÐ»ÒÏ»ÐÐ»ÒÎ¹ÍÐºÐÍ»ÐÍ¹ÒÎ¹ÏÊ¾ÐÎ¼ÌÑ¼ÐÎ»ÐÎ»ÌÎ·ÌÆ³¿²µ| ubw]oYu`z|`dgnt{¦°²£»¥»§¼«»©»©ÂªÄ®È®Å®Ã®Í°Î£·Ò ¹á®¾ñ¼ÆúÄÐúÊÖúÆÛúÊÛúÐÝúÒâúÓæúÙèúÙêúàîúâïúâñúâöúàôúâöúãõúãöúãøúã÷úãøúèøúç÷úèöúçúúêøúëúúêúúêúúìúúîúúíúúïúúðúúïúúìúúïúúòúúöúúöúú÷úúøúúúúúöúúøúúúúúúúúúúúúúúúúúúúúúúúúúúúúúúúúúúúúúúúúúúúúúúúúúúúúúúúúúúúúúúúúúúúúúúúúúúúúúúúúúúúúúúúúúúúúúúúúúúúúúúúúúúúúúúúúúúúúùúúúúúöúúóúúîúúïúúñúúòúúïúúïúúïúúìùúèúúæøúç÷úäøúäôúä÷úçøúèõúãöúàõúâõúâóúßòúÝðúÛîú×ïúÜìúØéúÙìúÙéúÖíú×íúÓéúÖëúÓèúÔæúÑäúÎâúÊàúÇÝúÈÝúÆÜúÆÖúÄÕú¿Õú¹Ïö»Ì÷¹Êò¸Èê²Áå­¾â§·Û§¶Ö´Ñ±É ¬Ãª» ® ª««§¥¢{qil`wdxrYunUwfYokWn`Oo_SndQqoW{w³«Å²ºÊ¸ÆÎ»ÌÌ»ÏÏºÎÏ¾ÑÎ»ÐÎ¼ÐÐ¾ÏÍ»ÏÎ¼ÐÑºÓÓ¾ÑÐ»ÐÌ¾ÎÒÀÑÒ¼ÐÏºÏÌ½ÐÐ»ÍÎ¼ÎÍ»ÏÐºÎÏ»ÌÎÀÐÌ·ÎÎ»ÎË¹ÍÌºÎË·ÎÌ·ËÐ¶ÎÎºÌÊ»ÌÊ·ÏÌ·ÎË¸ÊÌ¸ÍÊ·ÊÌ»ÌÌ·ÌË¸ÎÊ¹ÈÌ·ÏÌ¸ÊÊµÌÊ·ÊÎ»ÌÊºÊÊ·ÊÊ·ÊÈµÈÉ¸ÊÊ³ÊÈ·ÈÆ¶ÊÊµÌÈ·ÈË·ËÉ¸ÌÈ³ËÈ¶ÊÈ·ÊÈµÊÆ·ÉÈµÈÆ³ÇÇ³ÈÊµÊÇ³ÆÄ±ÆÆµÊÅµÈÄ¶ÉÃ·ÅÆ²ÇÇ³ÇÆµÇÈ¯ÈÃµÄÈ³ÆÃ°ÈÇµÆÈ¶ÆÇµÇÅ´ÆÃ³ÆÆ´ÊÃ³ÄÄ³ÄÆ³ÇÆ³ÇÄ²ÇÇµÈÆ³ÄÃ¶ÆÃ´ÇÃ°ÁÁ¯ÅÃ¯ÆÃ±ÄÀ±ÄÂ¯ÁÄ°ÃÁ°ÄÃ²ÃÃ±ÄÄ¯ÆÂ°ÆÃ±ÄÁ®ÁÃ³ÂÁ²ÃÄ²Ã¿¬ÅÄ®ÃÁ±ÅÁ°¾À¬ÂÁ®ÃÁ­ÃÃ­ÆÂ®Ä¿²Á¾°ÂÀ°Ã¾±ÁÂ®ÁÃ²Æ¾¬ÁÁ°ÅÁ²ÃÁ¬¾¾­Á¾®ÃÁ°Ã½­¿Á°Ã¾¬¿½ªÁ¾ªÁ½«¿¾­¿Æ®Ã¼®À½¬¿½ªÀ¾®¾»ª»»­½À¬¿»­¾¾­¾¼¬½¾¬½¼°À½¬½½¬¾»¬¾½©À¾«Á»¯¾»«¾½«¾º®½½ªÁ½«»»ª»¹ª¹º¬»·«¹¼¬¿»ª»¸¬»º«»º¨»¼¬¾¸§½»©À¹©»»¬½¼©º¹§¼¸©¸·©¾¶«º¸§·»¨¾»¨»»§¼¸©»¸¦¼³§¹¸¥¸·¡¹¸¦»¸¥»µ¥·¶¥º·§·¶¥º·¥·³§··¥»³«¹»¬Àº¬Â¼­Â½®Á¾¬À¼­Á½­Á¼¬½ºª½¿«Â¼¬Á»¬½¿®Á¿¬ÂÀ²Â½­Ã»®Â¾¬¿¾®Â¾¯Â½¬Ã¾®Ä¼¯ÃÀ°Á¼¯ÅÀ¯Ã¿­Ã½®¾Á¬Á¾¯Á¿¯ÂÁ¬ÃÀ²ÁÁ¯Ã¿¯ÅÀ¯ÄÂ®ÂÁ­Ã¿°Ã¿³ÁÀ®Ç¾¯Ä¿°ÅÂ±ÂÃ³ÄÂ²ÅÁ´ÆÄ´Ç¿±ÃÁ´ÄÁ¯ÇÁ¯ÆÀ³ÆÂ±ÆÂ±ÈÃ³ÅÃ´ÈÃ®ÆÅ±ÆÄ±ÆÃ¶ÆÃ³ÆÃ±ÆÄ°ÆÁ±ÇÃµÆÂ´ÈÁ³ÆÃ³ÃÃµÈÃ³ÇÁµÈÆ·ËÈ³ÈÂ´ÈÅ³ÈÆ³ÈÄ´ÃÄ³ÆÃ³ÈÆµÆÆ³ËÆ¯ÊÅ³ÆÆ³ÈÅ³ÉÂ±ÅÅ³ÊÈ¶ÉÈ³ÈÈ·ÊÆ³ÊÅµÊÊ¶ÊÆ³ÈÆ¶ÊÃµÈÆ·ÊÅ¶ÊÆ¸ÈÆ¸ÌÈ·ËÆµÇÇ³ÊÈ³ËÇ¶ÌÈ¶ÈÊ»ÌÇ·ÌÈ¸ËÈµÌÈ¹ÍÌ¹ËÈ¸ÌÈ·ÌÆ¹ÊÌµÌÈ·ÌÈ¹ÊË¶ÌÈ»ÌÅ¸ÌÇ³ËÊµÊÉ·ÐÊ·ÌÇ·ËÈ·ËË¾ÎËµÐÌ¸ÎÈ·ÌË·ÎÈ¹ÎÈ¹ÎÊ¹ÌÈ¹ÌÌ¸ÏÊ·ÌÌ»ÐË»ÐÌ¼ÏÌ¹ÍÌ¼ÏÈ·ÌÍ¼ÌÈ·ÍÊ»ÏÌ»ÌÇ¸ÏÌ»ÎÍµÒÊ»ÌÊ¼ÒÎ·ÑÊ»ÒÍ¼ÒÍ»ÑË¹ÎÍ¹ÑÎ»ÍÎºÐËºÐÊ¼ÐÍ»ÐÎ¾ÐÐ»ÒÉ»ÎÎ¼ÍÐ»ÒÍ¼ÏÌ¼ÔÎºÑÎ¼ÒÎ¼ÏÒ¼ÐÍ¾ÒÎ¾ÎÐ½ÒÎºÏÐ»ÐÐ¾ÓÎ¿ÎÏ»ÒÎ½ÓÐ»ÒÎ¼ÑÌ»ÐÐ»ÒÎÀÒÐ¿ÒÑ¾ÏÌ½ÔÐ½ÕÐ¾ÐÎ»ÒÎÀÔÑ»ÐÐ»ÒÐ»ÔÐÁÒÐÃÕÒ½ÒÐÀÕÓ»ÑÐÀÒÐ¾ÓÓ½ÓÒÁÕÐ¾ÕÐ¼ÓÒÁÓÐ½ÓÓÁÕÎÁÒÒ¾ÕÒÁÒÒ½ÓÏ¾ÐÒ¿ÕÒ¾ÓÑÁ×Ò½ÑÐ¾ÕÒÁÕÔÁÕÒ¾ÒÕ¿ÕÔÁØÒÁÓÓ¿ÕÔ¼ÕÑ¾ÕÒÁÒÓÁÒÓ¾ÒÐÂÔÑ¾ÐÑ»ÐÌºÉ³¥¼©iu`xblkutx~¨±¢ºª¿¨½¯¾®½¬À¯Ç¬É¡³Í¢µÎ¶È ´Í¢¶Î¡»Ø¥½é·ÂøÁÍúÊÕúÍÛúÐÛúÐÜúÒàúÖèúØêúÝìúàïúäñúæóúèöúç÷úçöúäùúåøúêøúëúúéúúëúúêúúíúúïúúïúúîúúíúúòúúñúúðúúóúúôúúöúúòúúòúúñúúöúú÷úúöúúúúúúúúúúúúúúúúúúúúúúúúúúúúúúúúúúúúúúúúúúúúúúúúúúúúúúúúúúúúúúúúúúúúúúúúúúúúúúúúúúúúúúúúúúúúúúúúúúúúúúúúú÷úúúúúúúúúúúúúúúúúúúúúúúúúúúúúúúúúúúúúúúúúúúùúúøúúôúúöúúõúúôúúïúúðúúëúúçúúèúúéúúïúúëøúíùúëùúéöúçöúäõúâõúèöúßóúàòúäïúáóúàñúßòúÜïúáðúÝïúÜïúÛíú×ëúÙìúÓçúÒçúÏäúËàúÊÛúÌÜúÉÛúÅØúÁÓúÀÒú¾Ïõ¼Êï·Åç´Ãã°ºÜ­¹Ø§·Ò¤³Ï¤µÈ®Â©µ¢²¥±­ ®¨¤ ~wtl~lxgwb~oi{q]{gYxg]tobzq`|¯¡¬Æ²¿Ò¾ÍÐÃÎÖÁÕÒ¿ÓÕÃÓÔ¿×ÑÁÒÑ¾ÕÓÂÒÑ¾ÒÓÁÓÑ¿ÓÓ¾ÓÕÂÕÓÅÕÓÁÕÓÁÔÓÃÖÒ¿ÒÑ¿ÓÓ½ÐÒ¾ÓÒ½ÐÐÁÓÒ¼ÕÒ¿ÑÐ¼ÐÒ½ÑÎ¿ÒÎÁÓÒ¼ÒÐ¼ÐÒÀÒÑ½ÐÌ¾ÒÌ»ÑÐ»ÎÐ½ÒÌ½ÏÏ¼ÒÓ»ÒÐÂÑÎ¼ÐÐ»ÎÎ¾ÎÍ¼ÏÐ»ÎÌ»ÍÊ¼ÐÏ¿ÐÍ»ÏÊ»ÎÐ¾ÐÌ¼ÌÌ»ÏÌ»ÎÎ»ÏÌ¿ÏÌºÎÎ¹ÎÎ¾ÎÌ¹ÌÌ»ÎÌ»ÎÉ¼ÍÊ½ÌÊ»ÌËºÌÌ¹ÎË»ÊËºÎÈ¸ÌÊ»ÉÉ»ÌÊ·ÊÈ¸ÌË¹ÌË¹ÊÇºËÉ¹ÎÊ·ÌÈ·ÊÈ»ÊÊ¸ËÈ¶ÊÈ·ÊÊ·ÊÊ·ÊÉ»ÈÉºÌÊ·ÊÈ¹ËÈ¸ËÇ¸ÊÈºÈÈ¹ÉÊ¶ÌÅ·ÊÈ³ÆÇµÈÉ·ÈÆ·ËÅ´ÈÅ¶ÈÉ¸ÊÇºËÆ´ÊÆºÊÊµËÅµÊÈ¶ÉÈ·ÈÂµÆÆ´ÆÇ¶ÉÆ·ÆÆ·ÆÄ´ÇÅµÊÁ¶ÈÅ·ÊÇ´ÈÆµÄÅ³ÊÆ´ÊÄ·ÅÃ¸ÈÃ·ÈÅ³ÅÆ³ÆÅ·ÃÆ³ÆÂ¶ÈÃ±ÅÂ³ÇÂ³ÅÇµÇÆ³ÃÂ´ÅÁ³ÆÀ³ÆÁ¶ÉÄ³Ä¿²ÆÁµÄÃµÄ¿³ÈÂ±ÀÂ³ÃÁ³Ä¾¯Â¿³ÅÁ±Ã¾´Â¿¯ÁÁ³ÂÃ³È½±ÁÂ±Á½¯ÁÁ³ÃÀ²ÃÁ²Â¾´ÃÀ®ÁÀ±Ä¿²ÁÀ®¿¾¯Â½°ÃÀ¯ÁÃ¬Á¿±Á¿°ÁÀ¯Ã¿°À¾´ÀÁ¯Â¼®À¾¯Ã¼°¿½¯Â»±¼½¯Á½¯¿½­¾»®Á¾®¾»®¾¾®Á½¬À»¬¿»­½¹ª¾¸¬»º®»»¬¿»«»»¬¾»¬¼¼°¼»­¾¼ªÁ®¥³·§»¹£º¸¨¸·§»·¦¾½¤»·£»º¦¾¸¨»¸¥»·¤»º«½¸¨»ºª½»§½»«¹»¦¾»§¾¶¬»»ª½»ª»·¨¼¹¨¾½§¾ºª½¾¨¿»©À¾¥¾º¬¼¼§¿»©À»¬¾»¦¾½¦¿»§¾º¬¿¼§À¼«¼»©Á½§¾½ª¾½©¿½¬Àº¬¿½¬¾¾­ÂÀ¬Á»®Á¾­¿¼¬¾Á¯Â¾©Â½­Ã¼©ÃÀ®Ä¾¬Á¿«ÁÀ¯Á»¬Ã½­Ã¾¬Á¼®Á½¬ÁÁ®Á½¬Ã»°Á¾«Á¼ªÃ¾®ÃÁ®ÅÀ®ÁÀ°ÁÁ­Ã¾¬ÃÁ¬Â½¬ÃÀ°ÃÀ®Ã¾¬ÃÁ°ÆÀ¬ÁÀ¬Å½¯ÀÄ°ÃÁ®ÃÂ¬ÃÀ¬ÁÀ°ÄÁ­Ç¾¯ÅÁ±ÁÃ®ÂÄ®ÆÁ³ÄÃ´ÆÃ´Å¿­ÇÂ±ÇÂ°ÄÂ±ÆÁ²ÈÃ³ÄÃ°ÆÃ²ÇÃ®ÅÁ®ÈÃ³ÆÃ±ÇÁ°ÆÃ²ÇÃ´ÇÅ²ÆÃ²ÅÃ²ÈÃ±ÈÃ²ÆÆ¯ÆÃ±ÈÇ·ÉÅ²ÈÂ°ÈÅ²ÉÄµÈÈ²ÉÄ´ÈÆµÉÆ³ÌÇ³ÊÃ³ÅÈ³ÆÄ³ÈÆµÊÇ³ÈÇ³ÈÆ³ÈÂ²ÈÄ°ÈÆ³ÌÆ³ÈÄ³ÊÅµÊÆ³ÊÈ¸ËÆ¹ÍÈ³ÈÆ´ÆÆµÉÈ³ÌÉ²ÈÅµÈÆ³ÌÆ±ÉÇ³ÊÄ³ÇÇ´ÊÇµËÊ¸ÌÊ¸ËÈµËË¹ÊÈ³ÊÅ³ËÉµÌÈµÌÈ´ÊÈ³ÎÈ´ÊÈ´ÇÇµÊÇ·ÌÊ¹ÌÉ¹ÍÊ¸ÌÈ¶ÎÉ·ÊËµËËµËÉ¶ÎÌ¸ÎË¸ÌÇ¶ËÇ·ÊÊ·ÎÉ¸ÌÉ·ÊÈ·ÍÊ·ÌÈ¹ÌÌ¸ÎÊ·ÎË¸ÍÌ¹ÎÈ¶ÏÌ¸ÊÌºÎÌ¹ÎË¹ÌË·ËÏ¸ÌÊ»ÍË·ÎÊ¸ÏÌ¶ÌÊ»ÎÊ¸ÎÊ·ÌË¸ÍÌ¸ÑÎ¼ÌÌ¸ÎÎ»ÐÎ¹ÒË»ÏÊ·ÏÎ¹ÎÌºÎÎ¶ÐË¹ÎÌ·ÎÍ½ÎÎ¹ÎÌ¸ÎÎ¹ÎÎºÓÎ¾ÎÎ¸ÒÐ»ÐÎ»ÎÏ½ÑÍ¼ÐÏ¸ÒÏºÎÏ¹ÏÍ¸ÐÐ·ÐÍºÐÑ¸ÍÌ¸ÌÎºÎÉ²Ä­µ~fr]t`u]|zbigotz¢¨°·¤¸©º©¹ª¾¬À¬ÃªÉ°Æ±Ã®Æ±ÏµÓ§¸ê¶Áõ½ÊúÇÓúÆÓúÅÙúÇØúÌÝúÐàúÓæúØêúÛêúÝïúßðúâòúàòúàõúáõúà÷úäöúä÷úâ÷úè÷úä÷úèúúéúúêúúêúúëúúëúúïúúïúúðúúðúúðúúòúúñúúñúúîúúôúúõúúõúúöúúøúú÷úúöúúúúúúúúúúúúúúúúúúúúúúúúúúúúúúúúúúúúúúúúúúúúúúúúúúúúúúúúúúúúúúúúúúúúúúúúúúúúúúúúúúúúúúúúúúúúúúúúúúúúúúúúúúúúúúúúúúúúúúúúúúúúúøúúùúúøúúõúúóúúòúúñúúðúúðúúîúúèúúçùúæøúåöúæôúæöúæøúæõúæõúãöúßóúßòúáòúâóúßïúÞïúÝïúÜïúßðúÛëúÙìúÕìúÙëúÙéúÕéúÓèúÒçúÐçúÊàúÊàúÌÝúÅÝúÆØúÄ×úÁÓú¿Ò÷»Íö»Êñ¶Èë²Âä®¼Û¤·Ú¢³Ò¤³Í¡°È¬ÇªÃ¤· ¬¦¦¨~rqk~dw`xqY|o[tiWqgYofQndQqgWllYx|n©¢Ã³»Ì»ÇÏ»ÌÏ¼ÎÐ¼ÎÌ¾ÏÌ¼ÎÍ»ÐÏ¼ÎÎ»ÒÐ»ÐÐ»ÊÎ¾ÐÎ»ÌÌ»ÐÒ»ÑÎ¾ÒÎ»ÏÎ»ÐÐ»ÌÎ»ÏÍ»ÐÌ¸ÎÎ»ÎÌºËÌ¸ÌË¶ÎË»ÌÊ·ËÎ¶ÌË¸ÌÌ»ÎÎ·ÎÊ»ÎÊ¹ÎÊ¸ÊÈ·ÊÊ¸ÌÈ·ËÊ·ÌÊ¹ËÊ·ÌÊµÊÌ¸ÌÌºËÊ¸ÍÊ¹ÊÌ¹ÉÉ·ÎÊ»ÉÌ·ÌË¶ÈÇ»ÈÇ´ÈÈ·ÄË¹ÉÊµÉÊ¶ÇÆ·ÊÈ¸ÊÊ·ÇÈ¶ÈÊ¸ÈÈ²ÊÄ³ÊÆµÈÉ´ÊÆ¹ÇÄ·ÈÊ´ÇÇ³ÇÆ¶ÈÆ´ÆÇ´ÇÆ°ÆÅ´ÇÇ³ÅÂ²ÆÈ·ÇÆ³ÇÃ¸ÅÆ´ÆÄ³ÈÈ·ÈÅ´ÇÆ²ÆÂ³ÄÈ°ÉÅ°ÅÃ²ÈÁ¯ÅÇ°ÃÆ³ÅÄ¶ÅÅµÆÄ³ÄÅ±ÄÃµÄÃ²ÅÁ±ÅÃ³ÄÁ²ÈÃ²ÃÅ°ÃÁ²ÄÀ³ÃÂ±ÃÃ°ÆÅ²ÄÂ³ÁÁ²ÃÁ±ÃÃ°ÃÁ¯Ä¿°ÃÁ±ÃÂ°ÂÁ²ÃÁ®ÃÁ¯ÃÁ¯Ã¿°ÁÀ°ÁÃ¯Á¾®ÃÃ®Ä¾¬¾Á°ÃÁ®Ä¿«Á¾­À½´ÄÁ±Á½®Ã¾®Â¿¯Ä¾¯ÁÀ­ÁÁ­¾Á¬Ã½®¾¾­Ã¾¬½½¬ÁÀ¬À»¬Á¾«¿½¬Â½«Á¾«½½¬½½¯¾¹¬¾»®À»©½»¬½½ªÁ¾ª¾½¬¾½­½»«¾·«¿»¬½¾«Ãºª¾º©»»¬¾»ª½¹­º¸¨»¹§»·­»º©¾¸ª¼»¬¾¼«½¾ª»º¬½¼ª¼¼ª¼·¨¹»¨¼¹«½¹©»»«»¸§º·ª¹¹«»»©¼µ¨¸·§º·¤¸º§·º¦·¸¥»¸«»µª·¸¥»¶¤ºµ¤·»¨º·¤··ª¸µ¦¸µ©¸»ª½¾«Á¼¯Á¾®¿À®ÁÀ¬¿À¯¿»¬Á¾«¿¼®À¿¬Á½©¿¾­Â¾®ÂÀ¬Á¾®¾¾®ÄÁ²¿¾²¿À®¿À¯ÃÀ²Ä¿¯ÃÀ°ÅÁ¬Á¿¯ÃÀ¬Ã½®ÄÀ¯Á¿­Ä¾¯Â½°ÂÂ¯Â¿³Æ¾¯ÃÀ¯ÁÁ®ÃÂ¯Á¾®ÅÂ­ÃÁ°ÅÀ¯ÃÁ¬Â½±ÃÃ°ÃÂ±ÃÃ¯ÅÀ´ÅÃ±ÅÀ²ÂÂ±ÃÃ°ÅÃ´ÅÃ³ÆÂ³ÈÃ²ÃÃ³ÅÄ³ÇÂ´ÅÃ³ÆÁ³ÄÁ²ÈÃ±ÅÃµÆÁ°ÅÃ´ÈÁ±ÈÂµÇÃ³ÆÄµÈÃ³ÈÄµÇÇ²ËÆ³ÊÅ´ÆÃµÈÃ±ÈÆ´ÌÆ´ÌÅ¶ÈÅ³ÇÃ®ÆÂ³ÈÇ´ÈÄ·ÇÅ´ÊÆ¯ÊÃ´ÊÆ¶ÊÆµËÃ¹ÉÈ´ÊÈ¶ËÆºÊÇ³ÊÈ¹ÈÄ³ÉÈµÈÆ´ÌÇ³ÈÆµÌÉ¹ÌÊ·ÊÇ¶ÊÈ·ÊÇ´ÌÈ¶ÌÈ·ÊÆ¶ÍÈ·ÌÇ·ÌÈ´ÊÈµÊÊ¸ÍÇ¶ËÇ·ÈÌµÍÆ¶ÌÊ¹ÊÉ¹ÌÊºÏÊ·ÊÈ·ÌÉ·ÊÊ¹ÐÌ·ÎÉ·ÎÈ·ÒÈ¸ÌÊ¸ÍÊ¸ÍÈ¸ÎÊ¹ÐË·ÌÌ¹ÍÊ»ÏË¹ÌËºÍÎºÌË¹ÐË¹ÌË»ÐÍ¹ÐÌ»ÍÌ·ÎÊ·ÎÈ·ÌÌ»ÍÌ¹ÐÌ¸ÐÊ»ÎÌ»ÏÊºÎË·ÎÍ·ÏÊ»ÐÎ»ÐÌ¼ÑÌ¿ÑÍÃÑÌ»ÐÏ½ÏÍÁÎË»ÒÎ¾ÑÐÂÐÐ»ÐÌºÐÎ»ËÏ¾ÑÐ¼ÓÌ½ÐÎ»ÒÐ¾ÒËºÎÌ½ÐÏ»ÒÐ»ÒÍ»ÐÐ»ÓÎ½ÐÎ½ÐÒ¿ÓÍ½ÐÐ¿ÎÎÀÒÎ¼ÐË¼ÏÎ»ÓÐ»ÓÏ¾ÓÏ¿ÒÐ¼ÒÎ¼ÓÎ½ÑÐ¾ÒÐ¿ÓÏ½ÓÒÁÒÏ¾ÒÒ½ÒÎ¾ÓÐ¾ÑÎ½ÖÑ¾ÓÐÁÒÐ¿ÐÒ¾ÕÕÁÓÐ¾ÎÐ¼ÖÏ¾ÖÎ¾ÓÓÀÓÑ¾ÒÎ¾ÕÑ»ÓÓ½ÒÎ¼ÒÐ¾ÒÒ¾ÓÒ½ÖÒ¿ÓÒÀÕÕ¿ÖÓÁÔÑ½ÕÔ½ÖÓÁ×Ò¿ÕÕÀÓÔ¿ÕÓÁÕÔÀÖÒÀÔÒ¿ÕÓ¾ÕÒÁÒÐ»ÏË´È¬·oud~iinttx{¡¬°¤´§º©»¬º¬À¬Á­Æ´È³É¯Í µÎ ³Ñ·Ð¦»à°Áï»ÃöÂÌúÆÓúÉØúÉÛúÎßúÐäúÖæú×êúÜìúáðúáóúâôúçöúçöúæ÷úçùúéúúæúúçúúèúúéúúíúúíúúìúúïúúðúúðúúôúúôúúöúúöúúõúúöúúõúúøúú÷úúóúú÷úúöúúúúúúúúúúúúúúúúúúúúúúúúúúúúúúúúúúúúúúúúúúúúúúúúúúúúúúúúúúúúúúúúúúúúúúúúúúúúúúúúúúúúúúúúúúúúúúúúúúúúúúúúúúúúúúúúúúúúúúúúúúúúúúúúúúúúúúúúúúúúúúúúúúúúúúúúöúúöúú÷úúöúúñúúðúúïúúêúúëúúéúúîøúîùúìúúìúúéøúê÷úæôúåôúæöúèóúèõúãñúäôúæôúâòúÜòúàñúáòúàïúàïúÚðúÞïúÝîúÔìúÑêúÐæúÏåúÌàúËßúÎßúÅÖúÁÓúÁÕùÁÒõ¾Ëñ¹Çê´Áß¬¾Ø¨·Õ¥¸Ò¥³Ð³É£®Æ¬Á¦¶¤ª¬«¡|trlo|dwdq`{n`zndtlWunf{r`n¢¤Äµ¾Ð¾ÊÓÁÒÓ½ÓÑÁÓÒ¿ÓÕÁÖÒÁÕÒÁÓÒÃÕÓ½ÕÓÁÓÐÂÓÕÁÖÕÂÕÒÁÕÓÁÕÓÀÑÏÁÕÓ¾ÎÑ½ÒÑÄÕÐÁÒÒ½ÓÐÀÔÐÁÒÕÀÕÐ½ÐÑ¾ÏÒ¾ÒÐ¼ÒÏ¿ÐÏ½ÑÐ¾ÒÒ¿ÓÐ½ÐÌºÎÏ¾ÒÐ¼ÍÎ¼ÒÎ»ÐÎ¹ÒÎºÎÍ¾ÎÎ»ÏÐ¾ÑÏ¾ÑÎ»ÐÐ¼ÐÍ½ÎÎ»ÎÏ¾ÏÐ½ÏÍ»ÒÎ»ÐÌ¹ÎÌ»ËË¾ÎÍºÍÎ»ÎÌ¼ÏÊ¹ÌÍ»ÎÌ»ÐÆºÍÌ¼ÌË¼ÏË»ÊÇºÍÍ¹ÎÌ·ÌÇºËÌ¸ÐÌ¸ÌÌºÌÉ¸ËÈ·ÊÆ·ÌÌ»ÌÉ»ËÊ»ÊÈ¼ÊÊºËÉºÌÉ¸ÊÉ·ÊÈ¹ÌÇºÍÊ¸ÍÈ¹ËÈ¸ÊÌ´ÊÈ·ËÉ»ÌÈ¶ÌÆµÉÇ¸ÆÈ·ÊÊ·ÈÆ¶ÇÅ·ÆÈµÈÈ·ËÈ·ÌÉµÈÇ³ÆÇ·ÈÆ¸ËÅ´ÈÇ¸ÊÆ¶ÇÅ³ÈÈ¸ÈÇ´ÈÆµÆÃ¶ÊÈ·ÅÄµÈÃµÌÇµÈÅµÄÆ»ÆÇ³ÈÄµÆÃ·ÄÃ¶ÉÄ³ÇÆ·ÆÄ³ÇÃ¶ÈÅµÇÂ·ÉÄ³ÃÃ·ÅÇ²ÆÂ´ÆÃ³ÇÆµÃÁ´ÈÂµÁÃ³ÆÂ²ÆÅ°ÃÀ´ÇÅ´Ã¿±ÆÃ¶ÆÂ¯Ç¿¯ÄÀ´ÃÃ°ÆÃ´ÅÄ­ÄÀ±ÅÂ³ÂÀµÁÁ´ÄÂ¯ÃÁ³ÆÂ±ÃÁ®ÁÁ¯Á¾²ÄÁ´Ã¾²ÁÀ²Ã½®Ã¾²Á¾²ÃÀ³Ã½°Â¼°ÁÀ³Á¿¯Â½²Á¿°ÁÀ±À¼³ÂÁ²Ã¿ªÀ¼°Á¿³Á½±Á½¬¾½®¾¼®Á¿²Á»¬¿¿±¾»¯¿º¯À¹¨¿¹¬¾½­¾»¬¾¹¬¼½¬¾¼¬¿¸­½¸¬¼¾¯¾»®¾½­½»¬¾¯¤´´¥º¶¤»»¦½·¥½·¦»¹¦¾¸¨»º§¼¸¤»¹¦º¸©¼º§½¹§»·§¾»¦½»¦¾·©»¸§½»©½º§¾½¤À»§¾¹¬»½¨Ã¸§½º©¿»¦¾¼©¿¹«¾»¬Á¼¬Á»¨À»©¼·¤½¼¤»¸ªÁ¿¨¿¸¬½»¬Á½¬¿½§»º¬¾»©À½¬Á½©¾¾§Â¿¬¾½©¿¾­Á»©¿¾­¾¿¬Â¾¨Â½¬ÃÁ«ÁÁ¬¾¾°À¾«¿¿«Ã¾¬ÀÀ­Á¾®¾¾±Á¾­¾¿°Ã¾¬Á¾¬Ã¿¬Á¾¬Â¾«ÃÀ¬Ä¾¬ÁÁ®Ã¿¬ÄÀ®Æ½­ÄÀ­ÃÁ¬ÄÁ¯ÂÁ®ÃÁ«Å¾°ÃÁ±ÄÄ®Ã¾­Ã¿®ÄÁ²ÆÃ¯ÅÁ®ÄÀ®ÄÂ­ÃÁ®ÁÁ¯ÈÁ¨ÅÁ²ÄÀ­ÆÁ®ÆÁ®ÆÆ²ÈÂ¯ÄÄµÄÄ±ÇÆ®ÉÄ³ÇÄ¯ÆÆ¯ÅÃ°ÆÄ±ÅÄ¬ÆÂ±ÅÄ°ÈÆ²ÊÄ±ÇÅ°ÉÄ´ÇÆ°ÆÁ´ÄÅ°ÊÃ®ÈÆ²ÈÈ¯ÉÃ°ÆÇ±ÃÄ±ÉÅ±ÊÃ³ÆÆ³ÈÄ³ÊÃ°ÇÃ³ÈÉ°ÊÅ³ÈÅ²ÈÇ²ÈÊ³ÊÃ·ÊÅ°ÊÅ²ÊÇ´ÇÇ´ÊÇ°ÉÈ¶ÊÆ´ÈÉ¶ÈÇ·ÊÄ°ËÆ´ÈÉµËÆ³ÊÆ³ÊÅ³ÌÆ³ÈÆ´ËÆ·ÈÈ·ÊÆ²ÈÈµÈÇµÊÊ³ÉÇ³ÊÈ¶ÌÇ·ÌÉµÊÈ´ÊÊµÊÊ¶ÌÈµÌÈ¹ÌÊ´ÌÊ·ÍÊºÎÉµÌÊ¶ÈÈ·ÌË²ÍÊ¸ÊÊ·ÌÊµÎÈ¶ÌÊ·ÍË·ÎÌ·ÌÌ¸ÉÊµÏÈ»ÌËµÌÎ·ÑÉ¶ÊÌ¸ÌÌ¶ÌÊ¶ÌÉ¶ÏÊ¸ÏÊ¶ÌÈ·ÏÌ·ÎÈ·ÍÊµÌÎ»ÐÌ·ÎË·ÌÊ¸ÎË¶ÏÌ»ÎÍ»ÏÍ·ÐÌ¹ÎÌ»ÌÌµÌÌ¸ÏÌ»ÐÎ·ÐÊ·ÌÉ»ÎÌ·ÐÌ»ÐË¹ÌÏ¹ÐÌ¸ÏÍºÔÍ·ÏÐ·ÐÑ»ÐÌ½ÐÏ¹ÎÎ»ÑÎ·ÔÎ»ÎÎºÏÍ¹ÏÑ¶ÑÎ»ÏÌ»ÎÌ¸ÐÎ½ÐÍ»ÒË·ÎÌ»ÎÇ³ÊÅ°À¬³{¡dt`t`~{d|bkikr|¦£°¢³¤º§¶§»§»ªÂ®Ä­Æ®Ï¯Ê²ËµÐ¢µÛ¬¹ê²Ãô¹ÈúÁÎúÃÐúÈÖúÆØúÊÛúÍÝúÍâúÔèúÛíúÝïúßïúÛðúàõúâñúÝòúâõúáöúåøúä÷úãùúåøúèúúçùúèúúíúúíúúïúúðúúóúúðúúóúúñúúòúúõúúòúúðúúòúúòúúôúúöúúúúúúúúúúúúúúúúúúúúúúúúúúúúúúúúúúúúúúúúúúúúúúúúúúúúúúúúúúúúúúúúúúúúúúúúúúúúúúúúúúúúúúúúúúúúúúúúúúúúúúúúúúúúúúúúúúúúúúúúúúúúúúúúúúúúúúúúúúúúúúúúúúøúú÷úúóúúðúúòúúîúúè÷úçúúæöúæ÷úã÷úç÷úè÷úäöúãõúãôúâôúßòúáñúÜðúáòúáïúäíúàïúâòúÞòúßïúÝïúÝñúÜîúÙìúÚëúÓéúÓæúÒæúÌãúÊÝúÊáúÆÚúÁÕúÁØú¾Óù»Íô¹Ëï¶Æíµ¿ä®¾Ø¸Ò£³Ï ®Í¯Ê¨Ã¨Ã¥»¦µ©¤¡zz|tllfq`t]xnYtl[ogSt`SqgSndUni_xzd¹®¶Í»ÁÏºÊÌ»ÏÏ»ÎÎ¸ÍÏ»ÑÐ»ÎÎºÍÏ¹ÌÍ¼ÏÐ»ÏÏ¾ÎÎ»ÌÍ¸ÍÑ¼ÍÎ½ÐÎºÎÌºÌÌ¸ÌÐ¹ÎÌ¼ÎÎ¹ÍÎ»ÍËºÌÌ¸ÊÍºÐÌ·ÊË»ÎÌ·ÍÊ·ËÊ¸ÍÌ»ÌÌ·ÎÌ»ÌÎ¶ÌÊ¶ÎÉ¸ÉË¹ÊÊ·ÌÊµÊÌ¸ÌÊ¸ÌÈ¶ÊÍ¸ÎÊ¸ÎÊµÈÉ·ÊË¸ÎÊ´ÈÊ³ÉË¶ÊÊ·ÈÇ·ÊÇ·ËÌ¸ÈÈ³ÆÊ·ÈÅ³ÈÇ·ÈÇ´ÈÊµËÆ¶ÊÇµÈÈµÇÉ´ÊÄµÇÆ´ÉÈ·ÈÆ´ÈÇ°ÈÆ´ÇÆ·ÅÆ³ÉÇ²ÈÆ´ÇÅ³ÇÄ°ÈÄ²ÈÉ´ÇÅ´ÈÈ³ÇÆ´ÇÆ³ÅÆ²ÆÄ³ÈÆ²ÈÆ²ÆÂ²ÆÆ°ÃÄ°ÃÅ²ÇÆ³ÅÃ¯ÆÃµÆÄ²ÅÃ¬ÅÃ²ÅÅ®ÃÃ°ÃÄ³ÄÀ°ÃÁ±ÆÂ²ÆÁ¯ÃÅ°Ä¿±ÆÄ¯ÄÂ°ÃÂ°ÆÃ³ÃÂ°ÃÂ¯¿Á°ÃÃ®ÂÀ°ÃÁ¬ÆÁ¯Ã¿«ÃÀ²ÅÃ²Â½¯Å¾²ÃÄ®Á¾°ÃÁ±ÃÃ®ÁÁ¯ÁÀ´À¿¯Á¾­ÁÁ²ÁÂ®ÄÁ«Ã½®ÁÄ®Á¼¬Â¾®ÁÀ­ÁÃ­ÀÀ°Á¼ªÂ¾¬ÀÁ«Ã¾®½¼®¾»ª¾¿¬Á¼¬¾»«Á¾­¾¼«À»©¿½®¼»«¾º­À¼¬½»¬¾ºª»½­¼¾©»¼§¾º¬»º­¾¸©»¸­¼»©¾¸ªÁ¸¬»»ª½¹¨¾»©¼¸ª»º¬½º¬»½¨º¿¬¾½ª»·«»¼«»¸§»¸¨ºº©¾¹ª¾¸¬»¹§»·§º¸¬¼¸©¹¸ª½¹¥··§¸º¥º·¦µ·¥ºµ¦¸³¬º·¦··¥º·¤··§¸µ§´´¤»¶¬¹´¬»»¨¼½¬Á¼«Ã»®¿½°¾½©Âº©¾»¬¿ÀªÃ½¬À¾¬¾½¬Â¾­Â½¬¾¼¬Á¾­Á¿®Á¾¬Â¿¬Áº±¿À¬Ç½¬Á¼®ÁÀ¬Ã»®ÁÀ¬Ã¿¯Á¿¬Â¿®ÃÁ°Á¾­Â¾¬ÂÀ¬ÀÀ­ÆÁ®Ã¼±ÂÁ°Æ¾°ÄÀ­Æ¿®ÁÂ«ÃÀ°Å¼®ÇÂ²Å¿³ÁÂ²ÄÀ±ÁÁ¯ÄÁ°ÆÃ­ÃÂ±ÆÁ²ÆÂ±ÆÁ³ÆÃ³ÃÁ­ÂÁ¶ÇÁ³ÈÁ±ÈÁ³ÇÃ±ÄÄ³ÊÃ±ÃÁ²ÆÅ±ÅÂ³ÅÃ¯ÆÁ¯ÅÃ²ÈÃ³ÆÃ°ÊÅ±ÈÃ¶ÇÈ³ÈÆ³ÈÆ¶ÇÆ´ÈÆ³ËÄ¶ÆÃ¶ÈÇ³ËÈµÆÇ³ÊÈ³ÈÃ³ÊÈ´ÇÅ±ÌÅ³ÈÄµÌÇ³ÌÅ³ÇÈ¶ÉÇ´ÈÅ°ÈÃ·ÈÈµÊÈ¶ÌÃµÊÈ·ÊÆ³ËÇ¹ÊÈ¶ËÆ´ÊÆºËÃµÊÊ´ÊÇ·ÍÇµËÊµÌÆ¸ÊÅ·ÊÊ³ÊÇµÊÉµÊÈ·ÊÈ¶ÌÊ·ÌÌ·ÎÆ³ÌÈ¹ÌÌµÐÈ¸ÊËµÊÆ³ÎÉ¸ÍÊ·ÎÈ·ÎÊ¹ÍÈ¹ÌÌ¶ÍÊ¸ÌÈ·ËÊ»ÐÊ·ÒÊ´ÌÊ»ÎËºÐË·ÎÇ¹ÐËºÐÉ¹ËÎºÎÌ¶ÍÊ¸ÎË»ÌÊ·ÑÌ¹ÏÈ»ÐÌ»ÎÊ»ÐÈ¸ÒË»ÐÌ¶ÏËºÐÊ»ÐÌ»ÐË¹ÐÍ¾ÑÍ¼ÌÈ»ÒÍ¸ÌÎ¹ÓÍ¹ÏÌ»ÐÍ¹ÓÏºÏÐºÐÍ»ÐÍ¸ÐÊ¾ÐÊ»ÓÍ¸ÐÍ¼ÒÊ¿ÒÐ¶ÏË¼ÏÐºÓÌ»ÒË¼ÏÍ¹ÑÏ»ÐÐ»ÓÎ»ÐÏ»ÓÎ¼ÐÐ»ÐÌ½ÐÌ¹ÒÎ¿ÐÑ»ÑÑ¼ÕÍ¿ÒÐ¼ÒÌ½ÓÏ½ÒÐºÔÑÀÒÌ¼ÒÕÀÐÎ»ÓÐ½ÒÐ»ÔÒ»ÒÑÀÒÒ¿ÕÒ¼ÕÐ¾ÕÎ¾ÒÒ¿ÕÒ¿ÕÎÀÕÓ¼ÓÐ¾ÐÓ¿ÖÓ¾ÖÐ¿ÒÒ¿ÒÓ¼ÑÒ¾ÓÑ¾ÓÓÁ×Ô¾ÕÒ¾ÕÒ¾ÕÒÃÕÑÁÓÓ¿ÕÐ½ÒÑÀÕÒ¾ÔÕ¾ÕÏÁÓÒÁÒÒ¾ÓÓ¾ÕÑ¾ÔÐ½ÔÒÀÕÐºÒÎ·Èµ ¼¨l|gnlktot¡¤¨£®¥¶«Áª¿­¿­Â­Ã²Î´Ð¢³Ò¥¹Ó¤ºÕ¤¹Øª¾å¯Áð¸Ç÷ÃÎúÆÔúÆÖúÌÚúÍßúÐàúÒäúÓêúÙíúÝîúàóúáõúäõúçöúäöúä÷úæúúêúúìúúëúúíúúìúúíúúêúúíúúïúúòúúõúúóúúõúúòúúöúúöúúôúú÷úú÷úúöúúöúúôúúúúúúúúúúúúúúúúúúúúúúúúúúúúúúúúúúúúúúúúúúúúúúúúúúúúúúúúúúúúúúúúúúúúúúúúúúúúúúúúúúúúúúúúúúúúúúúúúúúúúúúúúúúúúúúúúúúúúúúúúúúúúúúúúúúúúúúúúúúúúúúúúúúúúúúúúúúúúúúúúúúúöúúòúúðúúíúúëúúéùúìúúîúúëúúé÷úç÷úçöúäöúåôúäõúãöúäõúçôúèõúëöúèõúä÷úçôúæöúâóúãòúÞóúáñúÜðúØìúÕíúØëúÑçúÌäúÊàúÇÜúÃÙúÀÙú¿Óù¾Ññ¶Êí³Çé³Ãã©¾Ö«¹Ó¤¸Ò¤µË£±Æ¬Æ©Á©»¨² ¨¦£{xqo{d|k{d{q`zi[~o`{r_{g[xo`ud²¨³Î¾ÆÓ½ÏÑ¾ÒÏ¿ÓÒÁÓÓ¿ÕÓ¿ÓÑ¾ÓÓÂÓÑ¿ÓÓÁÕÓÁÒÕ¿ÕÓÁÕÒ¾ÒÑ¿ÕÑ¾ÓÓ½ÒÑ¾ÒÓ¼ÑÐ¿ÐÒÀÒÎ»ÐÏ»ÐÐ¿ÓÓºÓÐ¾ÐÎ¾ÐÕ¿ÒÐ½ÒÑ¿ÒÑ¾ÑÎ»ÐÐ½ÏÐ¾ÒÎ»ÐÐ¿ÐÐ»ÑÏ»ÎÏºÒÍ¾ÒÒ»ÔÎ¿ÍÐ½ÐÎ½ÒÐ¼ÐÌ»ÐÎ»ÒÍ¼ÎÎ»ÒÎ»ÏÏ»ÐË¿ÍÍ¾ÍÍºÎËºÐÎ¼ÍÐ»ÎÌ»ÎÌ»ÏÌ¼ÐË½ÏÌ·ÎË·ËË¸ÎË»ÐÊºÎÈ¹ÌËºÐÊ¸ÌË·ËÈ¹ÊÉ¹ÌÊºËÊºÊÊ¹ÊÉ¸ÊÆ·ÊÉ¸ÍÉ¸ÊÉ¸ÍÊ·ËÊµÌÈ¸ÏÊµÊÊ¹ÎÇºÊÊ¹ÌÈ¹ÊÈ¹ÊÈ·ÌÊ¹ÈÈ³ÈÈ¸ÍÈ·ËÆµÇÇ·ÈÈ´ÊÇ³ÈÇµËÇ³ÊÇ·ÅÇ¸ÊÈ´ÊÇ´ÉÇ·ÊÇ¶ÈÆ¹ÈÈ¸ÌÆ¶ÉÆ¶ÇÅ¸ÈÉ¹ÈÆ³ÈÅ³ÅÃ·ÆÈ³ÉÆ³ÈÂ¹ÇÆ´ÆÄ¶ÈÆµÊÅ³ÇÃ³ÈÂ·ÆÈ¶ÉÃ´ÈÃ¶ÅÂµÈÂ³ÈÂ³ÇÅ³ÄÄ°ÈÂµÇÃ³ÇÀ³ÆÅµÈÄ±ÆÃ±ÃÁ³ÃÁ²ÄÂ¯ÆÃ²ÅÁ±ÆÂ´ÆÂ´ÄÂ´Á¿±ÃÁ³ÀÁ²Æ¿®ÅÁ³ÅÁ²ÄÃ³Ã¼±ÅÂ­ÄÁ¯Ã¾±ÃÀ³Å¾°ÄÁ­Å¾µÁÁ®ÃÁ­Ä¾±ÁÁ±Â»®ÁÁ±ÁÀ±ÂÁ³ÁÁ±ÁÀ³Ã¿¬À»®ÀÁ¬Ã½±ÁÀ¯Á½¯¿¾®Ã¹¬Á¼®ÂÁ®À»®Áº¬Á¾¯¿½°¿»­Á»­Àº¬½ºª¿º«¾»©¼¼¬¿¸­¾»ªÀ¸¬½»­¾»­Á»ª½¼¬¾»®¼»©À»­¾²¤µ·¦»µ¤»·«½¸¤½·¨¸º§½»©»ºª»·©¼¹¨º¹§»·©¾»¥¹»§»º¥¼»§¿¸£¸¹§¿¹©¿¹¤»»¬½»¨¾¼¨¾¼ª¾»©¿½¨½»§»»©Á¸ª¾¾¨¾¸«¾º§¾½¥»»«¾¾¨¾¹«¾¹«¾¼¨¾»¬½»ª¾¼ªÀ½©Á»©¾¼©Ãº¨Á¾«¿¾¨Á»¬¾»¬½»¬¿½«Á¼¬ÃÀ¬Á¾ªÀ½¬Á»«Â¾ªÁ½­À¾­À½­À¿¬Àº­ÃÁ§À¿­Á½«ÁÀªÃ½¬¿¿¬Á¿¬Â¼®À¾­ÃÁ¬À¾­ÇÁ°ÃÄ²ÇÀ°ÃÁ«¾Á¬ÁÀ®ÃÁ°ÃÃ®ÆÂ°ÃÃ¬ÂÀ«ÄÁ¬ÆÀ®ÅÁ¯ÁÃ°ÆÁ®ÁÃ°ÅÁ®ÆÁ¬ÃÃ²ÆÃ²ÄÂ¯ÄÄ±ÇÃ°ÇÃ°ÆÁ°ÆÄ­ÆÁ®ÃÄ¯ÇÃ±ÈÂ¯ÄÃ±ÆÁ¯ÇÂ°ÇÁ¯ÇÄ«ÈÅ¯ÅÆ²ÄÃ²ÇÂ®ÉÃ°ÇÂ´ÅÅ±ÊÃ²ÆÄ²ÉÃ°ÊÁ³ÈÅ²ÆÅ¯ÉÄ²ÈÄ·ÈÇ²ÈÅ³ÈÄ²ÇÆ³ËÈ³ÈÄ´ÆÆ°ÆÆ°ÉÆ·ÈÃµÈÉ´ÉÆ²ÈÇ´ÆÈ´ÊÅ¶ÈÈ±ËÇ²ÊÄ´ÆÇ³ÉÈ²ÊÃ´ÈÇ²ÈÅµÈÈµÊÆµÊÊµÊÈµÌÈ²ÈÆ·ÌÈ³ÊÅ´ÌÉµÊÈ´ÈÈµÊÈµÎÉ³ÊÉµÌÉ³ÊÉ´ÈÄ±ÉÆ³ÊÇ·ÌÈ´ÊÄµÊÈ²ÊÈ¶ÎÈ¶ÌÈ³ËÉµËÇ¸ÉÊ·ËÊ¸ÊÈ°ÌÈ¶ËÊºÊÈ¶ÊÈµÌÎ³ÍÊ¸ÎË¶ËÈµÐÈµÍË»ÑÊ·ÎÊ´ÊÊ¸ÐÊ¹ÌÊ·ÍÈ¶ÍË¸ÎÊ¸ÌÌµÊÌ´ÑË·ËÍºÎÊºÏÌ¸ÌÉ¸ÎÎ»ÎËºÎË´ÏÐºÎÊ¸ÍÊ¹ÎÎ¸ÎË¶ÍÌ¸ÎÍ»ÏÌ¹ÏÌ·ÍÌ¸ÐÎ¹ÏÌ·ÎÍ»ÎÎ¸ÒÏ·ÏË¹ÓÐ¹ÐÍ»ÐÎºÒÎ»ÏÍ·ÐÎºÍÏºÎÌ·ÒÌºÎÎºÑÍ»ÐÌ¸ÏÐ½ÑÏ»ÒÏ»ÎÎ·ÍÎ·ÐË¹ÊÉ¶Æ··¢gdz_ggkklrwz§|§ °¢»§»¦¼ª¾©Ã¬Ì²Ô¸Ò ³Ø¦·Ü¥ºà«»æ²Ãð¶Äö¾ÇøÀÐúÁÒúÆÔúÈÖúÊÞúÐáúÐâúÕçúØéúÙïúÛïúßñúâôúßõúäöúáöúå÷úèúúåúúèúúçúúëúúçúúêúúîúúïúúñúúòúúóúúïúúðúúóúúøúúöúúòúúòúúíúúñúúõúúùúúúúúúúúùúúúúúúúúúúúúúúúúúúúúúúúúúúúúúúúúúúúúúúúúúúúúúúúúúúúúúúúúúúúúúúúúúúúúúúúúúúúúúúúúúúúúúúúúúúúúúúúúúúúúúúúúúúúúúúúúúúúúúúúúúúúúúúúúúúúúúúúúúúúúúúúùúúùúúöúúóúúîúúçúúæøúç÷úè÷úæ÷úçøúáôúßðúßñúÜñúÝïúàîúßïúàïúãðúâñúåóúäóúáóúãñúáòúâðúÞðúÛîúÛëúÙíúØêúÓåúÍæúÎâúÎáúÈÜúÇÚúÃØúºÓù»Îô´Ìò´Ìë°Åä®¾à¥»Ø£´Ð£±Í¯Ç¨À§¾£¿¸ ¬¡~x||zqqlfx`~rYxt`xnWqiSobYnkYrkUtdUrq[w¥¨¾¬¾Ê¹ÄÑ½ÊÎ»ÐÎ¸ÎË»ÌÏ¹ÒÎ·ÎÏ·ÐÒ¼ÐÎ½ÏÎ»ÎÎ½ÌÎ¾ÐÏ¹ÑË»ÎÌ¼ÌÎ¸ÎÊ»ÏÍ¸ÌËºÌÊ»ÊÎºÏË¸ÌË¸ÍÌºËÊ·ÌÎ·ÌÌºÎÊ¹ÌÌ¸ÌÊ·ÌË¸ÌÌ·ÌÌ·ÊÌ¹ÎÊ·ÌÈ¸ÉÎ¸ÌÉµÊË¸ÊËºÍË·ÌË¹ËÊ·ÌÊ¶ÌËºËÈ¹ÌÇ·ËÈ³ÈÌµÍÈ¸ËË¶ÊÉ¶ÉÈ·ÌÈ¸ÈÉµÌÈ¶ÉÈ¸ËÇ·ÈÈ¶ÊÆµËÇµÈÇ´ÈÇ´ÊÈµÈÈ²ÉÅ³ÅÅ²ÄÇ³ÈÇ´ÆÃµÈÄ´ÆÇ³ÅÈµÉÄ²ÉÇ²ÅÃ·ÆÆ³ÇÃ²ÈÃ³ÈÃ¶ÉÆ²ÇÃ·ÇÅ³ÆÄ²ÈÆ±ÄÄµÆÄ²ÈÃ±ÁÃ´ÆÆ±ÆÆ¯ÄÁ°ÄÁµÆÃ°ÃÂ¯Ã¿²ÆÃ°ÁÃ³ÆÁ±ÂÀ®ÅÃ°ÆÂ¯ÅÃ­ÃÃ°ÃÁ²ÃÂ®Â¿¬ÅÀ®ÄÃ±ÃÁ³ÅÁ¯ÃÁ¬ÄÁ²ÇÂ³ÃÁ®Ä¾®ÃÃ²ÂÀ¬ÃÀ°ÄÀ°À¿®À¿°ÂÀ­Á¾¯ÁÂ®Ã¿±ÃÁ¬Á¼¬¿Á¬ÂÀ¯ÀÁ­Ä½±¿Ã­¿À¯ÂÀ¯Â¿®¿À¬Á¾«¾¾°¾½¬Á¾¯Á½«¾¾ª¾»°¾¾¬¿½¬½½©¾¹®¼¾«¾»§½»¬Á»¬Á½©¼º¬¾½«¾»¬Á¼­¾½¬¾¼¬Á¹ªÀ¹ª¿¸¦½ºª»¹¨»¼«»»¨½»«¾º¨½¾ª»¹«½¹«»»§½»¬»¹¬Á¹ª»º¨½·­½»¨¾µ¬»º¥¹»¨½¸ªº·«½»«½»ª»·ª»¸¥¸µ¥¸¸§½·¦º¸¦¹·¤··©»µ¤¹³¦··§º·§½¶§·µ¤»µ£µ·ª·¶©¹»¬¾»¬¾¼¬Á½ªÁ¾¬À½¬Â¼«Á¼¬¾ÀªÂ½«¾¼¬¿ºª¿¾®ÀÀ®¾¼¬Á¾¬ÃÁ¬ÁÁ¬À¾¯Â¾¬Á¾ªÁ¾²ÁÁ®Á¾°ÁÁ¯ÃÀ±ÃÀ¬ÃÂ°Ã¿®ÃÀ®ÁÁ¬Â¾¬ÁÁ±Á¾²ÅÁ¬Â¾°Â¾¬ÄÁ¬Â¾±Á¾¬ÂÁ¯Ä¾­È¾®Â¾°ÃÀ²ÃÁ°ÆÂ±È¿®Ã¿®ÃÃ±ÄÂ³ÆÀ²ÅÂ°ÅÂ®ÆÁ¯ÃÁ°ÄÂ³ÆÀ²ÄÅ³ÆÂ³ÅÄ°ÃÂ±ÆÃ®Ç¿´ÆÄ±ÄÃ±ÆÁ³ÁÂ³ÆÃ±ÃÄ¶ÆÂ´ÈÂ²ÆÁ³ÈÇ·ÇÅ°ÌÃ°ÆÇ¶ÉÅ´ËÅ¶ÆÇ´ÆÆ²ÇÆ´ÈÆ³ÆÅ³ÆÇ³ÉÄµÇÆµÊÇ°ÈÅ¹ÆÈ¶ÌÃ³ÌÅµÎÅ´ÊÈµËÆ±ÆÈ¸ËÆµÉÈ¶ÈÈµÈÆµÊÇµÊÊ¸ÌÇ¶ÍÅ´ÈÇ´ÌÆµÌÈ³ÊÆ³ÌÉ³ÌÆ¸ÍÈ·ÊÈ¸ËÈ´ÌÆ´ÊÆ·ÊÉ³ÊÈ·ËÊ¸ÍÉ³ÌÈ·ÌÇ·ÍÆµÍÊ³ËÆ¶ÍÌ¹ÍÊ¶ÌÇ³ÎÊ¸ÎË¹ËÈ·ÌË¸ÍÈ·ÌÊºÏÌ»ÎÌ·ÎÈ·ËÊ¸ÈÊ¸ÍÊ¹ÎÌ»ÐÌ·ÍÍ¸ÎÇ¹ÍÉ¸ÐÉ¶ÍÌ¹ÏÌ·ÏÊ·ÍÊ»ÍÌºÎË¹ÐÌ»ÎÌ»ÎÊ·ÐÌºÎÌ»ÏÌ»ÑÌºÎÍ¹ÎÍºÒÍ»ÒËºÐÎ·ÎË¹ÎÍ»ÓÊ¹ÑÌ»ÑË½ÎÐµÎÌ·ÒË»ÒÎ·ÑÎºÍÎ¿ÒÎ¹ÒÌ»ÒÐ¸ÒÌ¹ÐÏ»ÐÍºÏÏ¼ÐÐ»ÒÊ¼ÎÎ»ÒÍ»ÓÏ»ÒÍ¿ÒÎ»ÑÏ»ÏÏ¼ÔÎ½ÒÎ»ÐÌ¾ÓÐ¹ÐÐ¾ÒÐ¾ÑÐ¸ÓÐ¾ÒÑ¿ÕÎ¾ÓÐÀÓÐ½ÑÒ¼ÒÎÁÒÒ¾ÕÑ¿ÖÐ½ÐÎ¿ÐÒÀÓÓ¼×ÏÀÐÎ¾ÒÐ»ÓÑÀÑÒ¿ÖÓ¼ÒÐÁÒÐ¿ÕÐºÒÐ»ÓÒÁÒÓ¾ÙÕÁÖÑ½ÓÕ¼ÓÒ¿ÕÏÂÒÐ½ÕÓ¾ÕÔºÖÑ¼ÑÒ¼ÔÐ¾ÕÓÁÖÕ¾ÙÑÁÓÓ¼ÕÒÁÐÑ¼ÎÌ¹Ê´¹§rqlnqruz|©ª¯¥Á©»¬½©Â°Ã°Ò¡¶Û©»ßª»Þ¬¾å³Áé³Æï¶Æó»Îõ¿Ì÷ÃÌúÅÒúÃÖúÈÙúÎÙúÍáúÑãúÔæúØíúÜîúÛñúàôúâõúä÷úèúúçúúìúúìúúíúúïúúîúúîúúîúúìúúïúúôúúôúú÷úú÷úúùúúöúúôúúùúúúúúúúú÷úú÷úúôúúñúúöúúöúú÷úúúúúúúúúúúúúúúúúúúúúúúúúúúúúúúúúúúúúúúúúúúúúúúúúúúúúúúúúúúúúúúúúúúúúúúúúúúúúúúúúúúúúúúúúúúúúúúúúúúúúúúúúúúúúúúúúúúúúúúúúúúúúúúúúúúúúúúúúúúúúúúúúúúúúúúúúúúöúúõúúòúúéúúëúúëùúëúúëùúëúúæùúâôúäöúáôúåôúäôúæóúäóúèöúé÷úêöúè÷úçöúç÷úçöúãôúäòúáòúßòúàñúÜïúÛëúÓíúÓçúÐèúÎäúÌßúÈÜúÁØúÁÖúÀÒôºÎð·Èê±Ãæ®ÄÛ¨¾Ö¥·Ï£´Ë­Ã¨Â¬Ã¨¾¤¶¥­ § ~xuq|k|g~|gwfxr[~nfun]~r`r`zo³£¯É´ÆÑ¾ÊÒ¼ÎÒÁÕÒÀÓÔ¿ÑÓÀÒÑ¿ÔÓ¾ÒÓ½ÓÓ¾ÕÐÀÓÓ¿ÒÓÀÓÏ¼ÔÐÁÕÕÀÓÒÂÒÐ¾ÑÑÁÑÓ¿ÓÐ¾ÒÓ¼ÐÑ½ÒÏÀÓÑÁÐÐ¿ÐÐ¿ÑÑ¿ÐÎ¾ÐÓ¿ÓÏ¿ÏÑ»ÑÏ¾ÒÐ¿ÓÎ»ÐÑ¼ÓÏ¼ÐÎ¼ÏÌ¹ÐÍ»ÑÏ½ÑÎ¼ÓÌ»ÐÒ»ÒÎºÓÍ¼ÍÐ¿ÑÎ¹ÐË½ÌÏ¾ÎÍ»ÒÏ»ÏÎ»ÎÊ¼ÑÌ»ËË¼ÐÎ»ÑÊ»ÌËºÍÌ¼ÏÍºÍÊ¸ÌÌºÍÊ¹ÍË»ÏÊ·ÏÌ¹ÌÉ¹ÍÊ¹ÏÊ·ÍÌ»ËÊ¸ÊÈ·ÎÈ¹ÊÉ»ÐÈ¹ËÉ¸ÌÊ·ÈÊ»ËÈ¶ÌÆ·ÊÇ·ÌÇ¶ÌÌ¸ÉÌ¹ÌÄ·ÈË¹ÊÈ³ËÉ·ÌÈ·ÇÈ´ÈÇ¹ÌÄ¸ÌÆ·ÇÃ³ÈÉ¶ÊÅ¸ËÆ¶ÍÆ·ÈÇºÈÅ¶ËÈ¹ÌÄ´ÈÇµÉÆ¶ÈÅ·ÈÁ³ÈÅ¶ÈÅ¸ÊÇ³ÈÂ³ÈÆ¶ÆÅ³ÊÅ³ÊÄµÈÇ´ÈÄ³ÇÅ´ÊÁ²ÆÄ³ÆÄ³ÇÅ´ÇÅ±ÅÆ·ÆÃ±ÇÃ³ÇÁ¶ÆÃ´ÆÅ²ÆÁ³ÅÂ¯ÆÃ°ÈÄ¶ÃÀ³ÅÅ³ÃÃµÇÅ´ÅÆ±ÆÀ³ÈÃ´ÃÂ±ÆÂ²ÆÀ²ÃÂ¯ÃÃ±ÅÂ¯Ã¾¬ÆÀ¯ÇÁ³ÃÀ±ÆÁ¯ÂÁ·ÀÂ±Å¿°ÂÀ²ÃÁ±ÁÀ®ÂÀ³¿¿±Å¾¯ÁÀ®ÁÃ¯Â¾¯Á¾±Ã½®Ã¾³ÁÀ¯ÃÂ´ÂÁ°ÂÁ³¿¾¬ÀÀ¯¿½®½¼°¾¾­Ã¼¯À¿¬À½¯Á¿«ÀÀ±¾À¬Â½­Â¼­¾¿±¾¿­¿¾­¾»¦¾¼¨¿·¬¾»ª¼»ª¾»¨¾º­½»®Á½©¹½¬¾»­Á»©½»­»»®À»¬¿»¬¼±¤³·¥·µ¢¹¸¨»º§º¸¦¸¸¦¹¹¦¹¶¤¾·§½»¤¾¸¥»·§¹·©¾¹§¼¸¨½»¨¿º©½¹¬¼·¬»º¥»·¨¾º©»»¦¾¸§»¾§¾¹§¾¹¨¼¹¨¿¶©¾»«½º¥½¹§À¹¬¾¹«¼»«Àº¨Âº©¼¾©½»§»»§¾½«½º«¾¼©¾»©¿½©Á»¨»½«¾»«Á½«À¼¬¿¿¬Á½«¾¾¬Â¾¬Ã»®Â¾¬¿»¬À¾ªÀ¿®ÂÁ«Æ½©Á¾°Á¼¬Æ½ªÁ¾©À¾ªÁ»®ÁÁ¬Â¼¬Á½¯À¾¬À¿°Ã½«ÃÀ³ÄÄ°Ã¾®Ã¿®ÃÀ¯ÄÀ°ÃÁ¬ÃÀ®ÃÂ°ÄÁ¬ÆÁ®ÄÁ®Ä¾°Ã¿­ÃÁ«ÅÁ®Á½¯ÃÃ²ÆÀ¯ÃÀ²ÄÁ®ÆÃ¬ÄÃµÅÁ°ÅÄ®ÊÃ°ÅÁ°ÆÃ®Ä¿°ÃÃ´ÅÃ¯ÇÃ­ÆÁ¬ÇÆ³ÆÅ°ÇÁ±ÄÃ³ÈÅ¯ÆÅ®ÊÃ­ÈÂ®ÇÁ®ÈÃ³ÆÄ°ÇÃ´ÆÅ¯ÉÃ±ÉÃ²ÇÅ³ÈÆ®ÈÄ®ÊÂ²ÆÃ°ÊÆ±ÈÄ·ÈÃ²ÈÆ°ÈÃµÈÅ³ÊÇ²ÆÆ±ÇÈ´ÇÇµÇÄ²ÊÇµÊÃ³ÊÈ¸ÇÇ²ÌÇµÊÆµÉÇµËÇ±ÈÆ³ÈÄ·ÇÄµËÇ¶ÈÆ³ÊÈ²ÍÆµÈÆµÉÆ³ÌÅµËÈ¶ËÆ´ÌÆ²ÈÉ·ÊÉ´ËÇµÊÅ±ÊÆµÊÈ²ÌÆ²ÉÇµÊÊ³ÊÆ·ËÊ·ÌÈ¶ÉÈ¹ÊÊ·ÌÉ¶ÊÈ³ÌÊ·ÌÉ²ÎÆ³ÌÈ·ËÍ·ÌÇ¸ÎÊµÍÊ´ÍÊµÍÉºÏÌ·ÎÈ¸ÌË»ÌËµÐÊ³ÌÊ¹ÌÌ¸ÏË³ÏÊºÊÊ»ÎÎ¸ÒÈ¹ÍÌ¸ÐË·ÎÎ·ÏÎ·ÐËºÐÌºÌÊ·ÏÎ¸ÍÊ»ÎÌ¸ÏÎ¸ÐÌ½ÐÌ·ËÌ»ÒÎ¸ÌÏ¹ÎÌ¹ÏÌ¸ÌÌ½ÐÎ¶ÎÌ¹ÐÊ¹ÏÎ¼ÓÌ·ÑÎºÎÌ¹ÏÏ·ÒÍ»ÐÌ¸ÐÍ»ÎÍ»ÏË»ÎÍºÏÌ»ÑÏ¾ÐÎ»ÒÌ·ÏÍ¼ÏÐ»ÑÍ¼ÐÍ»ÎÍ¼ÎÍ·ÌÈ¬Á§²uk|`bgdgntz|¤¹¸­·§·¥ÁªÇ¯Ù¢·Ü©¹á«¾æ¯ÀçµÃî¸Äó»ÆñºÈö¼Éõ»Èó¾Ìú¼Ðú¾ÑúÆÕúËÛúÊßúÏàúÒæúÔêúÙëúÛïúÜóúáñúå÷úçúúëùúëúúëúúéúúëúúìúúëúúíúúíúúîúúïúúóúúõúúôúúòúúòúúóúúöúúòúúïúúïúúîúúìúúíúúîúúîúúöúú÷úúôúúúúúúúúúúúúúúúúúúúúú÷úúúúúúúúúúúúúúúúúúúúúúúúúúúúúúúúúúúúúúúúúúúúúúúúúúúúúúúúúúúúúúúúúúúúúúúúúúúúúúúúúúúúúúúúúúúúúúúúúúúúúúúúúúúúúúúúúúúúúúúúúúúúöúúóúúìúúåøúä÷úâõúæôúãôúåöúáöúÜïúÞîúÝñúàðúàïúâòúäóúàñúäõúâõúåöúâôúáôúáòúâïúßñúÛíúÛîúÛëúØìúÔéúÑäúÎåúÏâúÊáúÆßúÄÖúÁÕú¼Òõ»Êó»Êð³Çæ³¿Þ©½Ø¢¸Ò²Ì°Ã¬½§¼¤¹¡¹ °¨{z{{xtlg~du`zr_xkYtfStfQogUqfQqgYuof~¸¤°Å·ÁÏ»ÇÌ¸ÌÊ¹ÊÐ½ÎË¸ÐÎ¾ÍÌ¹ÏÎ»ÐÌ·ËÎ»ÌÏ¹ÎÎ»ÎÎ¼ÌÎ¸ÎË·ÌÎ¹ÎÌ·ÎÍ¸ÎÌ¹ÎÍ»ÏË¹ÌÎ¼ÎÎ¼ÌÊ¸ÌÌ»ËÌ¹ÏÎºÊËµÊÈ·ÏÌºÏÉ¸ÍË¸ÌÌ·ÌÊ½ÎË¸ÎÌ·ÌÈ·ÊÍ¸ÍÊµËÉ·ËÊ·ÌÏ¹ÎÇ·ÊÊ¸ÉÈµËÌ¸ÌÉ¹ËÈ·ËÇ¸ËÊ¸ÌÉ¶ÍÅ´ÈÇµÉÊ·ËÉºËÈ·ËÇµÊÈµÊÈµÇÇ·ÊÈ³ÈÆµÈÈµÊÈ·ÈÆ¶ÇÇ´ÊÇ³ÉÄ´ËÅ´ÃÈ´ÇÃ´ÆÃ´ÈÆ±ÊÄ°ÈÅµÈÇ³ÆÃ²ÆÄ´ÇÃ°ÇÈ¸ÇÅ³ÆÆ³ÊÅ³ÃÃ³ÆÂ´ÆÃ³ÇÅ³ÆÄ²ÅÃ²ÆÄ°ÄÆ´ÅÃµÅÃ±ÆÀ²ÃÃ¯ÆÃ°ÃÃ±ÃÄ¯ÃÃ²Æ½®ÃÃ²ÅÂ®ÃÅ°ÄÃ²Æ¿°ÃÅ°ÃÀ®ÂÁ°Ã½¯ÄÂ±ÅÁ«Ã¾°Ã¾°ÅÁ¬ÁÀ°ÃÁ³Á¾®ÂÁ®Â¾®Á¾®Ã¾°ÁÁ¯ÁÁ­ÃÁ«Å¾¬ÁÂ®Ã»¬À½¯Á½«ÃÃ­Á¾®¾¿¯Ã¾­¿»¬Á»®À¾«¼½®¾¿®¾¾¬¾¾§¾¿¬¾¾¬Á½¨»º­Ã¼«½½¬¾¼®À½¬Á»«¾¼¬¿½¬Á»§Á¼­¾¼­¾¾¬¾»©½»ª¿»«Á¸¬»·«¿º¦½·«¾ºª¾½«½º¬½º¬½¹ª¾¹«»»¬¾¼¨¾»¨»»­¾¹¨¾¾«¾¸©»¸§¾·ª¾¸«¼º§¾¸¨¸¹©»·¨»º¨½¸«»·¨»·£½·¨º·§¸¹§º·§¹·§¹·©·¸§¸³§··¨¹¸©¼·¤»¶§»¶§¹µ¨º¶¥¶·§¸·«»¼ªÂ¾¬À¾­ÀÀ¬Â½ª¿¾¯Â¿«Á½¬¿»¯À¾¬À»ªÀÀ°½¾¬ÀÁ«Á¼®½À®Â¿¬Ã¾°Å¾¯À¾©Á¾­¿À¯Å¾ªÁ¼¯Á¿¬Â¿«Ã¾¯¿¼¬Â¾¬Â¿²ÂÀ®Æ¾¬Â¾¯ÃÁ°ÆÀ®Å¾­ÃÀ±ÃÁ³Ä¾¯ÄÁ²ÅÁ®ÂÂ®Ã¾±Æ¾¬ÃÁ°ÆÀ®ÄÁ¯ÁÁ¯ÅÁ¯ÂÂ°ÆÁ®ÂÂ²ÄÄ±ÈÁ±Ä¿¯ÅÁ³ÇÃ±ÅÁ³ÅÃ´ÇÁ¯ÃÂ²ÆÃ³ÅÁ±ÅÃ­ÈÁ±ÅÄ°ÉÁ°ÅÀ°ÇÇ±ÉÄ·ÆÂ²ÅÆ°ÈÃ±ÇÅ·ÆÆ³ÌÆ³ËÆ´ÆÅµÌÅ·ÈÂ³ÊÈ³ÈÅ´ÊÁ¯ÊÅ¶ÈÃ±ÈÅ¶ÆÅ¶ÈÆ±ÈÅ´ÇÄµËÅ³ÈÄ³ÆÈ¹ÉÆ³ËÈ³ÊÆµÊÉ·ÌÅ°ÊÇ¶ÉÆ·ÊÇ·ËÆ·ÊÇµÌÊ²ËÅ´ÊÆ´ÌÊ¶ÊÉ´ÊÇ¶ÊÊ±ËÆ¹ÌÌ·ÌÉµÌÉ¶ÌÆ¸ÎÆµËÉ²ÌÆ»ÎÈµÍÈ´ÈÊ¶ÊË½ÌÈ¶ÌÈ³ËË¹ÍÌ·ÍÉ¹ÊÇ·ÐÌµÍÊ¹ËÈ¶ÍÊ¸ÏÊ¹ÌÌºÎËºÎÊ·ÒÉºÐÌ¶ÎÈµÌÇ¹ÌÎ¹ÏÌ·ÎÈºÍÌ»ÐÌ¹ÐÊ¹ÒÌ»ÌÉ¹ÏÊºÍÊ¹ÑÍ¹ÐÌ¹ÍÊºÍÍºÍÌºÐÌ»ÐÍ¹ÎÌºÑË¹ËÑºÑÌ¼ÐËµÐÌ¸ÌÌ¹ÎÊ¸ÎÏ¹ÒÍºÐË»ÒÎ¹ÒË»ÍË·ÐÏ»ÒÎ·ÑÍ¼ÑÍ¼ÎË¸ÒÌ»ÐÑ»ÑÎ»ÑÌ»ÎÌ»ÐÏ¸ÒÐ»ÓÏ¼ÑÒ½ÒÐ½ÐÎ¼ÒÌ½ÐÐ¹ÐË¼ÒÒ»ÒÏ»ÑÎ»ÐÑ¾ÔÒ»ÐÐ½ÓÐ¼ÐÑ¾ÒÒ¿ÒÐ½ÔÒ¿ÑÐ½ÓÒ»ÕÏ½ÓÐ¾ÐÓ¿ÕÑÀØÐ¿ÓÔ¾ÔÒ¾ÒÐ¿ÕÐ¾ÔÔ¾ÕÒ¾ÕÒ¿ÓÐ¿ÖÑ¾ÕÒÂÓÐ¾ÓÐ¾ÒÒ¿ÒÓ¼ÕÒ½ÓÓÀÖÓÀÓÒÀÕÒÀÔÒ¾ÒÔÀØÕ½ÕÒ¿ÓÓ¾ÕÕ¼ÒÓÀÕÓ½ÕÒ¾ÕÑÂÕÓ¾ÖÓ»ÎÈ³Ç±¸¥rlnkqqxz¤¬¡³¢·¨´ª½¯Î´Ý¬»ç¶Áì·Åï»Æð»ÊõÁÌ÷ÁÏöÁÌöÃÍ÷ÁÏöÁÑö¾Ðú¿ÎúÃÙúËÜúÌÜúÐäúÕäúØìúÙíúÝïúßóúåöúçöúä÷úìúúïúúïúúñúúïúúòúúðúúðúúîúúðúúóúúòúúõúúøúúùúúöúöôöúöúúøúúóúúôúúñúúïúúïúúíúúîúúðúúöúú÷úúöúúöúúúúúúúúúúúúúúúúúúúúúúúúúúúúúúúúúúúúúúúúúúúúúúúúúúúúúúúúúúúúúúúúúúúúúúúúúúúúúúúúúúúúúúúúúúúúúúúúúúúúúúúúúúúúúúúúúúúúúúúúúúúúúúúúúúúúúúúúúúúúúúúúúúóúúïúúêúúèùúç÷úëøúé÷úçõúåöúßóúãñúâôúäñúçôúçõúçõúçõúèùúæ÷úèöúæöúæùúèöúæöúãôúâõúàòúßñúÛîúÙïúÙêúÐçúÓçúÒäúÌãúÈÝúÆØúÃÖú¾Òö¼Ðó¹Êñ·Ãç±ÁÞ©¾×©·Õ¡µÈ²¾ª¾§¿¦º§·¤¬¦¥¥{xnrg|kxbxqb|kUzl_zn]xnb|ul¶¤³Ì¾ÅÕ¿ÎÓ¿ÒÑ¾ÒÕÀÒÑÀÓÑ¾ÐÑÀÔÕ¿ÓÒÀÔÒ¾ÒÓ½ÒÑ½ÑÓÀÖÐ»ÒÏºÓÒ¿ÓÓ½ÓÑ¾ÏÓ¾ÒÕÁÓÓ¿ÒÒ¿ÐÕ¿ÒÒ½ÓÒ½ÓÐ½ÓÎ»ÎÑ¿ÓÑ»ÓÍ»ÎÏ¾ÐÍ½ÐÐ¿ÑÐ½ÎÏ½ÐÒ»ÎÐ»ÐÎºÎÎ»ÒÒ»ÎÐ»ÐÍ»ÐÎÀÎÒ»ÐÐ½ÑÎ¿ÓÎ»ÐÍ¿ÐÎ¾ÒÎ»ÎÐºÐÎ¾ÐË»ÒÎ»ÐÌ¹ÌË»ÐÎ»ÏÎºÎÊ½ÍÎ»ÐÍ¼ÎÊ»ÐÉ¹ÍËºÍÈ¹ÏÉ»ÌÍµËÉ¹ÑË¼ÎÈ·ÍÉ¸ÊÊ¼ÍÌ¶ÊÈ»ÌÊ·ÉÍ·ÊË·ÆÇ¹ÈÉµÏÊºÉÇ»ÎÉ¸ÌÊ»ÌÇ·ÌÊ¸ËÉµÉÈ·ÊÌ»ÌÉ¶ÌÈ¹ÊÈ·ÊÉ¶ËÇ¶ÌÇ·ÈÇ·ÊÆµÈÆ»ÉÈ¶ÊÆ¸ÈÅµÈÈ·ÊÇµÍÈ³ÊÈ¶ÊÆ³ÇÇ¹ÈÅ³ÈÆ³ÈÆ·ÈÆ´ÈÆµÆÉ·ÉÆ¶ÈÃ²ÆÂ³ÆÃ³ÇÅ´ÆÅ¶ÆÃ³ÆÆ¸ÇÄ²ÅÈ³ÆÄ´ÇÇ±ÆÀ´ÄÃ±ÇÂ±ÅÄ´ÇÁ³ÆÃ¯ÈÂ³ÃÅ¶ÇÄµÆÃ¶ÂÀ³ÆÄ³ÈÀ³ÆÃ³ÆÃ°ÄÁ±ÂÂ´ÃÁ³ÃÁ°ÁÁ³Ç¾³ÇÂ°ÄÁ±ÆÁ²ÃÂ¯ÁÃ³ÆÁµÃÂ±ÆÁ³Å¿¬Ã¾¬ÁÃ³ÆÁ±ÅÀ®ÃÀ³Á¿³Ã¿¯À¾°Á½¯Á¿°ÂÁ³¿Á®ÃÁ­Ä¾³Â¿±À¿±Ä½®Â¿­Â¾±Á½¯¾¿®À¿¯À»¯Â»­¿¼²Ã½¬À½®Á¿®½º¬Á¾±¿¼­À¿­Á¼¬À»­¾¼¬½¹¬¾¼©¼¼®¿¼¬¿ºª»¹¬Á½¬¼¼©¿»ªÁ»©»º®¿»ª½º¬¾±¥²¶¨»¶§º·§»»§»·§¿¹¥»¸¦½¹©ºº¦»¶¤º½§¾º§º¸¦»º¤»»©¾»©À»«½¹ªÀ»§¾·§À¸¤»º¨¾»ª¾º©½¸§½·¥»¾©¾º¨»½¨À»¤¼º©½»§¿»§¿¹§¾»«¾¸©¿º§½¸«À»§¿º¬¿¼§À¹©ÁÀ©½º­¾¼§Á¾¦¾½«À¿©Â¹©¿¼¬¿»¬¿º¬Á¾©Â¾«¾½®ÄÁ¬Ãº«Â¾®ÀÁ­Á½ªÃ¿­Ã¾¬À¿­ÃÀ¬Â¾®Ã½­¾¿«Ã¾¬¾¾ªÃ¾¬ÅÀ®Ã¾¬ÄÂ­Ä»®ÃÃ°Æ½²ÅÃ¯ÃÁ±ÆÁ®ÆÁ¬Ä½®ÁÀ°ÅÃ®ÄÁ­ÂÁ±ÄÁ¬ÆÂ¬ÂÂ¬ÃÂ¬Ä¿¯ÅÂ­ÅÃ¬Æ¾®ÃÁ¬ÃÃ°ÆÂ®ÄÁ²ÈÀ¯ÆÅ¯Æ¿¯ÃÅ±ÈÁ­ÇÃ´ÃÄ³ÈÁ«ÅÂ±ÄÃ²ÉÃ³ÇÃ®ÆÁ°ÈÁ­ÈÅ°ÅÃ°ÆÅ°ÈÆ¯ÈÃ³ÇÈ²ÈÃ²ÆÆ³ÈÆ®ÊÇ´ÈÃ±ÈÄ´ÈÃ²ÈÆ²ÊÆµÈÄ¯ÊÅ¯ÆÄ´ÊÃµÊÇ±ÊÇ·ËÅ®ÊÅ·ÈÈ³ÈÈ³ÊÄ²ÉÇ³ÉÅ²ÈÈ³ÊÃ³ÇÆ°ÉÈ²ËÆ°ÉÉ³ÍÅ²ÌÈ²ÈÇ·ËÆ°ÈÃ·ÊÊ´ËÇ³ÊÆ³ÊÈ²ÊÈ·ÌÆµÊÆ¶ÈÈ³ÊÊ´ËÇ¶ÊÅ±ËÅ³ÊÈ²ÊÉ¶ÌÈ·ÌÈµÉÉµÌÈ³ÎÈ¹ËÇ·ÌÈ¸ÊÆ±ÉÉ³ÊÊ³ÌÈ´ÌÈµÐÉ³ÌÊµÎÊ¹ÎÈ·ÏÈµÐÈ´ÌÈ´ÍÇ¸ÌÊµÌÊ·ÒÇµÎÊ·ÎËµÍÅ¶ÎË·ÑÌ¹ÎÌ»ÌÌ¶ÌË¶ÎÌ·ÏË·ÌÌ¶ÐÌ¸ÏÊºÎÎ»ÏË¶ÎÌ·ÎÌ»ÎÉ¸ÎË¹ÐÉ·ÎÌ¶ÍÌ·ÐÌºÎÏ»ÑÌ»ÍÌ¶ÐÎ¸ÐÌºÏÎ»ÐÌ»ÒÐ¹ÒÎ¸ÏÎ¸ÐÌ»ÎÌ»ÐÍ¹ÑÐ¹ÐÐ»ÎÌ»ÐÏ¶ÏÏ»ÏÌ»ÐÌ´ÏÌ¿ÐÎ»ÐÎ»ÑÍ¸ÒÏºÐÎ¹ÎÎ¸ÑË»ÎÎ¹ËÀ®Á©®zffzfgonkrxz| §­¡­ »§Í£°á°¸éµÄïºÄó¿Èô¾Êò½É÷ÁÊ÷¾Ëô»Îô»Ëõ·Éö»Ê÷¼Íú½Òú¾ÕúÊØúÎàúÎâúÎæúØéúØïúÜîúâôúáõúäöúäøúéùúéúúìúúéúúèúúìúúéúúìúúìúúîúúîúúóúúôúúõúº÷ºdúd¸õ¸úóúúñúøïøÀðÀuõuÁïÁøçøúèúúéúúòúúñúúóúúñúúôúúùúúúúúúúúúúúúúúúúúúúúúúúúúúúúúúúúúúúúúúúúúúúúúúúúúúúúúúúúúúúúúúúúúúúúúúúúúúúúúúúúúúúúúúúúúúúúúúúúúúúúúúúúúúúúúúúúúúúúúúúúúúúúúúúúúúúúúúúúúøúúðúúêúúáúúáõúäôúäôúä÷úßñúÝïúØïú×êúáîúàîúáòúÝðúãñúàòúãòúáóúâõúàòúäñúãóúãóúßóúÜñúÙîúÛïúÖíúÕèúÕçúÏãúÎãúÎáúËÝúÉÛúÃÖú¿Òø¹Ðñ·Êï¶Çê°Ãâ¬»Û¦¼Ô¢µÊ®Ã«¹¦¸£º¡³¯©¦x{{|{xfizgtYzkYwl]tfOqkSn`QrfQwob{°¨È²¿Ì·ÈÍ·ÎÎ¾ÌÎºÍÎºÎÏ¹ÏÉ¹ÏÎ¹ÑÏ¹ÎÌ¹ÏÏ¹ÎÊ»ÌÏ»ÍÎ·ÏÌ·ËÌºÊÌ»ÊÌ¹ÎÌ»ÐÌ»ÌÊ¶ÒÎ»ÏË¸ÎÍºÏÍ·ÊËµÊÊ¸ÌÌºÌÈ·ÍÍºÎÊ·ÍÌ¹ÉÊºÌÉ¹ÌÊ¸ÉÉ¸ÌÊ¶ÍÌ¸ÌÆ¶ÌË·ÌÉ·ÍÉ¶ÎÈ·ÊÆ¶ÍÊ¹ÊÊºËÇ¹ËÉ¸ÌÊ·ÌÊ·ÊÉºÌÈ¶ÊÈ·ÊÈºÎÈ·ËÇ·ÆÊ¸ËÈºÊÉ·ÇÇ·ÊÇ·ËÉµËÇ·ÇÈ¶ÊÆ²ÉÈ´ÈÇµÆÆ³ÊÆ³ÈÆ³ÉÄ³ÆÆ³ÈÇ·ÊÇ²ÈÃµÆÆ´ÇÆ±ÈÃ³ÆÆ²ÇÆ³ÇÆ±ÇÆ³ÆÃ³ÈÃ³ÇÂ³ÆÆ³ÈÃµÆÃ³ÆÄ³ÈÆ³ÇÁ²ÈÄ°ÈÃ³ÆÀ³ÃÃ±ÆÂ³ÅÄ°ÆÂ²ÇÃ°ÄÁ±ÃÃ²ÆÇ´ÆÁ°ÄÁ²Á¾®ÄÃ±Ã¾²ÄÁ°ÃÁ®ÃÃ±ÆÁ®ÁÀ²Ä¿³ÁÀ¯ÃÂ­Æ½­ÂÁ­Á¾¯Ã¾¯ÁÁ­ÁÀ¬ÅÀ²ÃÁ±ÃÁ°Ã¼®ÀÂ²ÃÀ­Á¾¬¾¾¬ÁÀ«Â¼®Â¾°Á¾²ÁÀ¯¾½¯Á»®Â½¬¾¾®Á»¬Á½¬À½¯¾½®Á½®Â¾°À½¬¿À¥¾¼¬À¼¬Á»ª¾»®¿¼¬¼»ª¾»«½¼¬¾»ª¿½«¾¾¬º»«¾ºª¼»¯Á¹©¿¼­¼º¬¿»«½»ª¿»©¾»ª¾·©¼»ª¾»ª¾º¦½º©º»¬¾»©¾¹ª»·ªº»§½º¨½¸ªº·©»·§¼»§º¸¦»·¢»¹©»º¬¾²§º¸§¹ºª¼¸¥»¶§·º§¸³¥»´¥º¶©¸¸¨¸³¦¸·§»¼¦··§¸·¥½·£·µ§¸¼¬¿¼«¿¾¬Â»®¿¼¬¿»¬À¾¬¿»®Á»¬¿½«¾¼¯¾¼«¾»­Á¾­Á½¯À½«Á¿®Â»­Á¿«¿¾¯ÁÁ¬À¾°¿Á®Â½¯Ä¿¯Â½¯Ã¾®Ä¾¬Â¾¯ÁÀ³Á¾¯Ã¾®ÅÁ¯Ã¾°ÃÀ³ÆÁ°ÅÀ±ÄÀ°Ã¾¬Â½¯ÂÁ²ÁÁ®Ã¿±Á¿´ÄÀ¯ÄÁ¬ÄÁ±Á¿®ÅÁ°ÃÂ²ÆÀ±ÅÃ°ÂÁ³ÉÃ±ÆÀ°ÈÁ´ÅÁ°ÄÆ°ÅÂ±ÆÄ²ÅÅ³ÁÁ³ÈÃ´ÃÃ²ÇÃ´ÆÃ¶ÆÃ°ÆÆ±ÆÃ¯ÆÅµÉÂ´ÈÃ³ÄÆ¯ÇÄ´ÈÃ³ÉÆ´ÊÈ°ÊÅ²ÈÆ·ÉÈ³ÈÆ´ÆÈ³ÌÈ¶ÉÅ³ÊÅµÌÇ²ÇÃµÊÆ·ÈÈ¶ÎÃ¶ÇÉµÊÇµÍÃ´ÇÈ´ÉÆ´ÊÆ³ÈÇ·ÊÆ³ÈÇµÈÅ¶ËÊ·ËÇ·ÌÉ¶ÈÆ¶ÌÈ³ÌÆºÊÌ´ÍÈ¸ÌÈ·ÍÊ¸ÎÈ¸ÍÇ´ÌÆ¶ÌË¸ÌÇµÌÈºÊÈ·ÌË´ÍÉ·ÊÈ¶ÎÊ¶ÎÈºÏÈ¹ÍÉ´ÎÊ¹ÌË·ÐÌ¶ÍÌ¸ÍÉ·ÊÇµÎÉºÍÊºÍÊºÐÉ·ÎÌ¹ÌÊ´ÎÌ»ÎË¹ÐÈ·ÎÊ¹ÎÈ¹ÐÌ»ÏÍ»ÌÊ¸ÎÊ¸ÐË»ÐË·ÏÍ¼ÏÌ·ÌÌºÏÎ¶ÎÍ´ÐÊ»ÎË»ÐËºÐÈºÎÐ»ÐÎºÐÉºÐÍ¹ÒÈ¸ÐÌ¸ÐÈ·ÌË·ÐÌ¼ÏÏ¼ÑÌºÎË·ÐÎ½ÎÎ»ÎÊ¹ÐÍ¹ÎËºÎÎ½ÒÌ»ÐÌ¹ÒÍºÓÎ¿ÒÏ¾ÒÌ¹ÑÊ»ÒÌºÐÌ¹ÐÎ½ÑÎ¼ÑÎ½ÐÌ¸ÐÏ¼ÐÒ¼ÐÑ¿ÐÐ»ÓÓ»ÒÐ¼ÓÐ¿ÕÐ¾ÒÒÀÒÒ¹ÓÒ¼ÔÐÀÕÏÀÑÑ¼ÖÓÁÓÒ½ÓÎ½ÓÎÁÓÑ»ÒÐ¾ÒÒ¼ÓÎ¾ÓÓ¾ÕÒÀÕÐ¿ÔÕ¿ÔÕ½ÔÑÁÒÒ¾ÒÒ¿ÖÓ¾ÔÐÀÕÏ½ÒÕÁÕÒ¿ÕÕ»ÔÒ¾ÓÓ¾ÕÒÁÙÎ½ÑÐ¼ÕÐ¾ÓÒ¾ÖÒ¿ÕÒÂÔÓÁÕÔ¿ÕÓ¾ÖÐ½ÐÒ¼ÑÕÃÐÒ»ÒÌ¸Êµº¥qqqlxxu~~¡ ¤§¯¤¶ªÁ¯Ö­·ë»ÄöÀÊ÷ÄÌúÆÒøÄÏúÅÒúÇÑúÁÏ÷ÃÌ÷ÀÐõ½Îõ»ÎùÁÖúÀÕúÆØúÇÛúÏãúÕäúÕèúÙðúßóúâóúåøúèõúëùúêúúïúúíúúïúúîúúíúúïúúïúúòúúôúúòúúóúúöúúõúø-ý-CüC+ý+ùúõúù!ý!?û?"ü"óúðúúïúúòúúóúúôúúöúúöúúúúöúöúúúúúúúúúúúúúúúúúúúúúúúúúúúúúúúúúúúúúúúúúúúúúúúúúúúúúúúúúúúúúúúúúúúúúúúúúúúúúúúúúúúúúúúúúúúúúúúúúúúúúúúúúúúúúúúúúúúúúúúúúúúúúúúúúúúúúøúúóúúëúúäúúä÷úåöúêøúêùúãóúÞòúÛñúÜòúàñúáñúâóúæóúèõúæõúçøúæ÷úäöúæöúæøúæ÷úã÷úæöúâôúÞóúàòöÝìúÛíúØíúÔçúÖçúÒéúÑãúÌãúÈÛúÅÙú¿Õö¼Ðó·Ìï´Èé°Äã¬¾Ø¨ºÎ¢³È±¼«º¥½¢¹£¯®³¦¢§¡ worizkwf{ziq`zk_xq_xwbz{n¹§·ÍºÄÑÀÍÒ¿ÒÒ¾ÏÑÁÒÒÂÕÑ¿ÒÓ¾ÒÔÁÑÍ¾ÐÒÀÒÐ¾ÔÓ¿ÑÏ½ÒÔ¼ÎÐ¿ÍÐ¾ÑÓ¾ÒÐ½ÒÒ»ÒÒ¿ÒÓ¾ÐÑÁÒÐ½ÕÒ¿ÓÒ¾ÔÏ¼ÐÐ½ÓÒ¼ÐÑÁÒÒºÎÏ½ÓÐºÐÐ¾ÐÎºÒÍºÍÍ¿ÒÑ½ÑÎÁÑÏ¼ÒÏ»ÎÎ½ÒÊ»ÐÍ»ÐÏ»ÒÍ»ÐÏ»ÎÏ¼ÏÐ»ÍÎ¾ÐÌ¼ÎÍ¿ÎÌ¼ÐÎ¼ÎÍ¾ÑÊºÐÏ½ÍÏ¼ÍÉ»ÐÍºÊÌ¼ÐË»ÎË¹ÌÌ»ÏÉºÏË¹ÍÈ¼ÎÊºÏËºÊË¸ÌËºÎÈ¹ÌË¹ÌÊ»ÍÈºÊÈ·ÊÊºÍÈºÌÆ·ÊÈ»ÌÌ¸ÉÊ¸ÈÉ¹ÉÌ·ÊÈºÊÊ·ËÉ¹ÊÆµÉÈ¹ËÈ·ÌÈ·ËÈ¶ÊË·ÊÅµÉÅ¶ÊÊ¹ÈÆµÊÈ¸ËÆ¸ÊÇ²ÊÅ¶ÉÆ¶ÉÈ¶ÊÄµÈÉ´ËÄ³ËÆµÇÆ¸ÊÈ¸ËÆ³ÊÆ¹ÈÈ³ÈÅµÉÅµÈÈ³ÆÃµÈÃµÆÆ·ÉÆ³ÈÂ³ÅÅ³ÉÆ´ÉÅ´ÆÃ¶ÈÂ³ÇÁ³ÆÂ¶ÆÆ°ÃÃ²ÆÁ´ÃÆ³ÄÁ³ÄÂ´ÆÃ°ÄÃ´ÃÂ·ÆÅ³ÃÁ³ÆÁ³ÄÂ´ÃÁ±ÃÁ²ÃÂ³ÄÀ±ÃÂ³ÄÃ³ÃÁ¯ÃÁ²ÆÁ³ÆÁ³Æ¾³ÄÃ°ÃÁ²ÆÀ²Æ¾±ÂÀ­ÇÁ¸ÅÃ²ÂÁ±Æ½®ÁÁ°ÃÁ±ÄÀ²Â¿²À¾¯ÁÀ¯Á¼¯Â¾®¾¿¬¿¾°Ã¿¬Ã¼­¿¼°Á½±Á¾¯¿¿­Â¼²¾¾¬Á¼®¿½¬Á¾¬Á»¬¾»®¿»¬Á¾­¾¼±¼¼©À»­¿¼²¿»®Àº¬½»¬¾¿¬À¸®¼»¬¿¸¬½¾®Á¸¬¾¹©¾»«¾¹¬¾»­¾ºª¼®£³¸©¼¹£¹»¨¾·¦¼¸¨¾·©»¹¤¼¼§½»¦½»¦½º§½¸¤½¹§¼¹¥¾º¨¼·©»¸©½¹¥º¸§»º¨Á»§¾¸©»»ªÀ¼ª¾¸¦ººª¼¾¨Á½¨½¸¦Á¼©Á¼«¿º«¿»ªÁº¨½»©À»©¿¹ª¿·ª¿»«¾¼©¾¹©¿»«Á¼«À»©Á»ªÂ»¬Á»«Á½¨Â»©¿»¬¾¾¬Á»§À½¬Áº¬À¿ªÂ¾«Â»«Ã¿«Ã¿©Á¿ªÂ¾¯Á¼©Â¾¬ÂÀ¬Ã¾«Á½¬Ã¿­Â¿«Á½¬Ãº¬Ã¾©ÁÁ­ÁÀ­Æ¿°Ã¿®ÄÃ±Ã¾¬ÃÁ­ÂÀ±ÃÄ¯ÆÀ¬Ã¾°ÇÁ³ÃÁ¬Ã¾®Â¾°ÄÁ®Ã¿±ÅÂ­ÃÁ¬ÆÃ®ÄÀ¯ÆÀ­ÄÁ¯ÃÅ°ÇÂ°ÆÃ¯ÃÁ®ÆÃ±ÄÁ¯ÅÁ°ÈÃ­ÇÁ°ÅÃ®ÅÁ¯ÇÄ°ÄÃ°ÆÄ±ÅÃ¯ÇÃ³ÆÃ²ÊÃ°ÈÂ¯ÆÄ³ÇÆ±ÈÄ°ÌÆ´ÇÅ¯ÇÃ³ÉÂ°ÈÇ¬ÈÃ°ÆÄ¯ÆÅ³ÊÁ±ÊÆ°ÈÆ°ÊÆ³ÈÄ²ÈÄ³ËÆ³ÉÆµÊÆ³ÈÆ´ÌÇ³ÊÈ²ÊÆ²ÉÃµÈÆ³ÌÄ¶ÊÃ³ÉÈ³ÊÇµÈÆ¶ÊÈ³ÈÈµÊÈ®ÌÆ¶ÌÆ´ËÈ¶ÊÇ·ÈÈµÌÇ´ÇÆ·ÌÇµËÆ´ËÈ³ÈÉ³ÎÆ¶ÊÆ³ÎÈ´ÊÊµÌÆ±ÈÈ¯ÍÈ°ÉÈ²ÎÊµÊËµÏÈ¶ÎÈµÊÊµÍÇ²ÌÈ²ÌÊ·ÏÇ³ÊÊµËÊ¶ÎÊ·ÍÉ·ÎÊ¸ÍÉ²ÌÊµËÌ¶ÎÈºÊÈµÍÉ¶ÌÉ·ÎÉ³ÌÊ·ÌÌ·ÍË»ÐÎµÎË·ÐÊ·ÏÎ¼ÍÊµÐÈ¸ÍÊ·ÊÌºÎÍ¹ÏÊ¸ÏÌ·ÌÌ·ÏÊ·ÎÌ´ÑÈ¶ÏÉ·ÐË¶ÍÐ¹ÏÉ·ÒÎ¸ÐÎ¹ÏÊ¹ÎÍ¹ÒÎ¸ÑÎ»ÐÎ¹ÐË¸ÎÏ¹ÐÌ¹ÏÍ¹ÐÌ¼ÑÐ»ÓÏ»ÒÌºÎË»ÎÎ¸ÎÎ¼ÐË»ÏÎ»ÑÎ»ÒÎ»ÑÍºÏËºÏÍºÐÎ¸ÌÊºÎÌ»ÎÎ¸ÌÈ¯Ã«³{lb|ggkrrtx|{z§«³¡¾¬Øª·é·Ãõ¾ÉöÃÌ÷ÁÊøÄÏùÁÑùÀÌø¿Íö¾Ìð·Çð³Èó·Ëö¸Ëú½Íú¿ÓúÄØúÊÜúÌáúÍãúØèúÚíúÜîúàñúâõøãöÇìÄ®î¬ðèðúêúøèøÄêÄ{ó{ãíãúêúúëúúïúúïúúðúÖôÖQûQ¼ô¼ðóð¥÷¥*ý*«ô«%ü%øîïîô&ü&ÚìÚúéúúêúúìúúîúúëúúïúºøºdûd¸ù¸úúúúúúúúúøúøÈúÈ®ü®îúîúúúúúúúúúúúúúúúúúúúúúúúúúúúúúúúùúúúúúúúúúúúúúúúúúúúúúúúúúúúúúúúúúúúúúúúúúúúúúúúúúúúúúúúúúúúúúúúúúúúúúúúúúúøúúñúúëúúà÷úÜöúàòúàóúäôúáñúÜñúÖíúÕëúÖîúÛïöáëúÞñúÝïúàðúáòúâôúãôúãôúáóúáñúàóúÝòúßòúÜðúÙïºá±dï]¸Ü¬úÒèúÎæÄÚµäyærÝÖÐ¼úÀÖú»Ñö¹Êò³Æç°Ãç«¿ß¦¸Ù¥·Î±Ã§»¤µ¡²°°§©¥¤||xwodw_~qYznYto]tlWtlUqiUtiUzwgµ³È·ÁÈºÇÌ¹ÌÍµËË»ÌÎ»ÐÌºÌÈºÌÌ»ÎÎ·ÍÊºÎÎ·ÎÊ·ÎÈ·ÎÌ·ÏÌ¸ÌÎ·ÌÎ»ÌÐ»ÌÌ»ÎÊ¾ÎÎºÐÎ»ÎÐ»ÌÌ¸ÎÐ·ÎÌºÌË¸ÎÊ¹ÌÌ¸ËË¹ÍË¸ÌÌ¶ËË·ÏÌ¸ÎË·ÉÈ¹ÌÊµÊÉ¶ÌÈºËÊ¹ÊÉ·ÊÌ¸ÍÉ·ÉË³ÊÊ¹ÊÈ¸ÊÈ¶ÊÈ¶ÉÉºËÉ·ÌË¸ÌÊ¹ÊÌ·ËÈ¶ÉËµÌÈ´ÌÈ·ÌÉµÌË¶ÊÇµÊÆ³ÌÇ¶ÊÊ·ÈÅ³ÇÇµËÇ²ÇÆ³ÇÆ±ÉÆ·ÊÆµÉÅ³ÇÈµÊÃ°ÉÆ·ÊÅ³ÈÈ³ÈÅ²ÇÄµÇÅ°ÈÈ´ÈÆ³ÇÄµÅÃ³ÊÄ²ÇÄ¶ÅÁ·ÉÄ³ÄÄ°ÅÃ³ÊÇ´ÈÇ°ÈÃ±ÈÃ³ÅÀ²ÃÁ°ÆÅ´ÆÁ­ÄÁ´ÄÄ²ÆÃ±ÅÃ³ÄÄ°ÈÄ¯Æ¿¯ÆÂ°ÄÃ°ÆÁ°ÅÃ®ÅÁ®ÇÁ°ÃÁ®ÁÃ°Ã½®ÃÃ²Ã¾°Ã¾®Ã¿®ÃÀ­ÃÀ²Ã¾­ÃÁ±Å¿°ÁÀ¬À¿²ÆÁ¬ÁÁ­ÁÀ°Ã¾­Á½®ÃÀ­ÁÁ«Á¸¬¾¾®Ã½¬¾À¯Á¿­À¾«ÁÀ®Á½±Á¼­¾»¬¾»­ÁÀ«À½­À»¬Áº­À¾«¿½¬Àº­Á¿ªÁ»®¿»«¾»¨¾»¯¾»«¿¼«Â¸«¾º¬¿¹¬¼½«¾º©À½«½»¨¾»­½¹©¾»®¾¸«¿»«º¸«¿»ª»¹«¾¹©½º«¾»©½¸«½¸¬½¸ª»¸ª¼º©½·ª¾¸¥»·§ººª¼¸£»¶ª»¸¨»·§»¸¦»·¢º·¡º·¦º¶§¸¹§º·¥·µ©»¶£ºµ¦··§»¸©»´¥»³¥¸¶§¸³«¸À«Â¾ªÃ¾­¿¼­À¾¬Ã¾¯Ã½¬ÀÀ¬Ã¼¬À¿­Âº¬À»©Ã¼®Áº«Ã¼«Áº¬Â¾®Ã¿®Æ¼¯Å¾®ÃÀ®Ã½­Ã¿®Ã¾®Æ¿®ÁÀ¬Æ¾®Ä½¬¿Á³Å¿®Æ¾®Å¿°ÂÁ­ÆÀ®ÄÀ®Å¼­Æ¼¬ÅÁ²Ä¾®ÃÀ®Ä½°ÃÁ²ÆÁ­Å¾¯ÁÀ¯ÃÀ­ÇÀ°ÅÁ²Ç¿¯ÃÂ°ÄÀ¯ÇÁ¬ÇÂ²ÈÃ°ÉÂ°Å½®ÇÂ³ÆÅ³ËÂ³ÅÂ²ÆÆ°ÊÂ¶ÈÁ³ÇÃ°ÇÁ±ÆÁ³ÈÅ³ÈÄ°ÈÃ³ÃÁ³ÌÅ³ÊÃ³ÈÃ°ÉÃ²ÊÂµÆÃ³ÉÇ´ÈÄ³ÊÃ´ËÆ³ËÇ±ÈÆ´ÇÈ¸ÊÄ´ÈÇµÉÅ³ÊÆ³ÈÄ¸ÊÆ³ÊÅ·ÌÅµÊÆ´ËÆ³ÌÆ·ÈÆ¶ÉÅ³ÌÇ·ÌÄµËÇ´ËÃ·ÊÇ³ÌÃ¶ÍÆ´ÌÆ¶ÌÆ³ÎÈ¸ËÆµÌÇ·ÏÌµËÆ´ÒÇ¸ÌÆ´ÎËµËÆµÎÉ´ÎÆ¶ÎÇ·ÍÈ·ÏÈ¹ÉÈµÎÉ´ÎÊ¶ÊÊ¶ÌÈ·ÐÈ¸ÍÉºÐÈ³ËÈµÐÉ¼ÎÈ¸ÎÈµÌÊ»ÐÊ·ÓÈ¹ÎÊºÍÊ·ÎÌµÏÈ»ÌÊ¶ÒÌ¹ÏË»ÎË·ÎÊ¹ÍÊºÏÏ·ÒÊ·ÑÉ¹ÐÊ»ÐË¼ÑÍ»ÒÉ¶ÍÌ»ÐÌ¶ÐÈ¸ÐË·ÐÍºÐÎ¹ÒÊºÐÌ¸ÎÌ»ÒÎ»ÒÎ»ÒË¸ÒÍ¹ÑÍ¶ÐË¹ÐË¹ÐÎ¼ÕÌ»ÐÎ»ÓÍ»ÑÎºÒÊ·ÐÎ»ÓÌ¹ÐÍ»ÐÎ»ÓÐ½ÒÐºÒÒ¿ÒÌ¹ÒÐ¾ÓÒ½ÒÍ»ÕÎ¹ÓÏ¾ÕÎ»ÓÎ»ÔÒ¿ÒÐ¾ÕÎ¾ÕÑ»ÔÐÀÕÑ»ÕÐ¾ÒÎ¹ÑÍ¿ÖÐ¾ÕÐ¼ÔÐ»ÕÎ¼ÓÒ½ÒÐ»ÒÐ½ÓÎ½ÓÒ½ÔÍ»ÓÒ¿ÖÐ¾ÓÒÂÕÒ½ÙÒ¿ÕÑ¿ÕÔ¾ÖÑ¿ÓÌ¼ÔÒ¼ÕÒ¿ÒÒ»ØÐÀÕÒ¾ÖÒÀÖÐÀÖÑ»ÖÒÀÔÐ¼ÓÒ¾ÕÐ¿ÒÓ¼×ÕÁÖÒÀÕÑ¾ÔÒ¾ÓÑÀÔÓ¿ÒÒ¾ÖÓ¾ÖÓÂÕÓ¼ÓÊ¶È±ºªqrrowxxz ¢  ¨¢¯¥¸§Ë£´ä³ÀòÁÈúÆÑúÈÕ÷ÇÕúÊÒúÆÔúÆÓùÀÒ÷ÀÓô¾Ñô»ÌóºÎõ½ÐúÂÔúÅØúÈÛúÍàúÏçúÑéúÕêúÝïúàóúçöúåù­î­ýôúîúøíøõ%û%5ù5)û)ÌñÌúñúúðúúòúúôúøöøÚøÚîöîú÷úgúg?ü?µõµ(ý(ÌùÌúõúÌöÌ)ü)½ñ½úïúúñúúòúúòúúóú÷-ý-CüC+ý+ûúúúúúú±ú±þüúúúúúúúúúúúúúúúúúúúúúúúúúúúúúúúúúúúúúúúúúúúúúúúúúúúúúúúúúúúúúúúúúúúúúúúúúúúúúúúúúúúúúúúúúúúúúúúúúúúúúúúúúúúúú÷úúñúúêúúâøúãùúàõúã÷úéöúç÷úáöúÝòúÝîúÝñºæ´dô_¸è¶úáõúãôúâôúêöîêìªð¦ÙêÖúèöúç÷úåöúãöúâöî-ù)Cõ?+÷*éöÕçXðR+ø((÷$JðC²Û úÆÚúÁÙù¾Òô·Íï·Èí²Æä®ÀÞ©¿Õ¤·Ì´Â°¹§µ§´¥¯²³¢®©©¦{qnkx`tb|od|r]nb|od|rdo£·¨·ÉºÊÏÃÎÒ½ÎÎ¾ÐÑ¿ÓÑ½ÒÒ¾ÓÎ»ÔÑ¿ÐÒ¼ÓÐ¿ÓÑ¾ÐÏ¼ÒÍÀÓÑ¾ÕÐ»ÔÐ¿ÒÐ¿ÒÐÀÖÐ¿ÓÒÁÓÒ¼ÔÓÀÓÐ½ÓÐ¿ÓÑ»ÑÎ¼ÒÍ¾ÔÏ»ÒÐ½ÓÎ¿ÒÐ¾ÓÌ¾ÕÐ»ÓÐ¼ÎÐ½ÒÎ¼ÔÒ¼ÒÍ»ÐÐ¼ÐÎ¼ÐÍ¿ÒÎ¼ÑÎ¼ÑË»ÐÎ¾ÑÎ¼ÒÎ»ÎÌ¼ÒÎ¾ÌÐ¾ÒË»ÒÐ¼ÐÐ¼ÒË¼ÑÐ»ÐÎ½ÑÍ¾ÎÏ»ÒÊ¸ÒÌºÌÌ½ÐÉ·ÍÈ¹ÌÌ¸ÍÌ¹ÑÈ·ËË¹ÎÈ»ÐÆ·ÌÊ¶ÍÌ·ÎÎºÍÈºÌÊ»ÍÈ³ÎÈºÊÆ¸ÐÌ·ÌÆ¹ÉÍºÎÈ¹ÍÉ·ÍÈ¸ÎÊ¹ËÊ»ËÅ¹ÌÉ·ËÈ·ÊÈ¹ÌÊ·ÎÅ¸ÉÆ·ËÉ³ÊÆµÊÆ´ÌÈ·ÊÆ¶ÌÈ¶ÈÇ·ÎÅµÌÆ»ËÇµÌÈ´ÉÇ·ÊÄ·ÊÇ·ÌÅ¶ÈÉµÈÅ·ÊÆ´ÈÅ³ÈÈµÉÆ³ÆÃµÊÃ´ÊÆ³ÈÆ·ÌÆ³ÇÃ³ÆÅ·ÈÅ³ÈÃµÉÂ·ÆÃ´ÊÇ¶ÈÄ³ÈÄ¹ÊÆ²ÆÅ¶ÆÃ·ÅÁ±ÈÁ±ÄÃ³ÆÁ²ÅÁ³ÄÃ±ÆÁ±ÆÀ°ÅÁ²Ã¿¯Ä¿³Ã¿³ÃÁ²ÆÀ±ÅÀ³ÄÃ²ÄÁ°ÄÁ±ÅÁ²ÆÂ¯Ã¿³Ä¾¯ÃÁ®Å¾±Ã¿®ÃÁ°Ä¿¯Ä¿³Ä¿®Â»±ÂÁ³ÅÁ³Â¾«ÃÁ³Ä¾¯Ã¾°Á¾°ÂÀ¯Áº°Ã¾®Â½¯À¿¯Á¾²À»®Ä½®¿»®Ã»´Â¾®Á¾¯Å¿®Ã¼¯Â¾¬Á¹«¿½¨Â»­¿¼¨¿»¬À»®¼¼®¿»ª¼»«½»¬¾¼¯¿»¬¾»©¾»¬Á»®À¹¬¿¾¬½¼­Á¹¬¾»¬¿³£µ·¢¸·§¼½§¾»©»¹¨¾¸¨½·¤¼»¬½¸§»¸ª»¹¦»½©¼»©º¸ª¾»¦¼»¥¾»©½»¨½»¥¼»ª½»¨¾½ª¿¾©¼½¬»»§¾·¨¾»¬¾»¬¿»«¾º©¼»©¾½¬Á¾¨Á»ª¿¼ª¿¼©À¾¬Á¾«¾¸ª¾»¨¾»¬¾¼¨ÁÀ¬¾¾ªÁ¸®Á½¦½»«¾½¬¿¼¬¼»¬¿¼«À½¬Á¾¬¾»¬À¾«Á½«Á¾«Á¾­¾¾©Ã¼¬Ã¾­Ã¾­Á¿±Á¼¬Á¾«Ã¾¬Á¾¬ÁÁ¯Ã¾­Ã¾¬ÁÁ¬Ä¿¬ÁÁ¬ÃÀ«ÂÄ®ÄÀ°ÄÁ¬ÁÁ°ÅÁ¯ÆÅ²ÇÄ°Ä¾­ÅÃ¬ÁÄ²Å¾¬ÃÁ°ÅÄ®ÆÂ®ÅÂ²ÆÂ²ÆÀ¯ÄÁ³ÅÁ¬ÆÃ­ÆÁ³ÆÃ³ÇÃ®ÄÁ³ÅÁ¯ÃÄ®ÆÆ¯Æ¾°ÃÆ­Ç¿±ÆÃ°ÈÂ°ÆÄ´ÈÃ³ÇÅ²ÊÁ±ÇÉ³ÈÆ²ÇÃ³ÆÃ±ÈÆ´ÆÃ³ÊÄ³ÆÆ²ÊÆ³ÈÆ²ÊÉ²ÊÆ²ÆÆµÆÆ²ËÂ²ÈÂ°ÇÈ²ÇÆ²ÊÆ²ÈÅ³ÈÆ²ÇÈ²ÈÇ²ÊÆ²ÊÈ³ÊÇ¶ÉÆ²ÇÆ®ÈÇ³ÇÄ²ÌÆ´ÉÃµÆÈ´ÊÇ³ÉÆ³ÌÇ±ÉÉµÊÇ¸ÊÆµÌÇµÌÇµÈÉµÌÃ·ËÇ·ÌÇ³ÇÈ²ÊÇ³ÅÇ¹ÊÈ²ÌÈµÌÊ·ËÈ³ÊÊ¸ÎÊ³ÌÇµÌË¶ÍËµÎË·ÊÉµÍÉµÍÈ¶ÌÊµÎÆ¶ÌÊ®ÊÈµÌÊ·ÌÊ·ÍÊ¸ÎÊ´ÎÇ¶ÏÌ¶ÍÊ¸ÍÊºÍÌ·ÐÊ·ÐÊ¹ÎÍ¸ÏÊµÊÊ¸ÏÎ»ÐÌ¶ÎÊ¹ÍÌºÎÊ¶ÎÊºÏÊ¶ÎÊ¸ÐÊ¸ÎÎµÐÌ¹ÎÌ·ÌÍµÎÎ¶ÏË¹ÎÌºÍË·ÐÊ¸ÌËºÐÎºÏÌºÒÎ½ÎÎ»ÎÏ¸ÐÎ¹ÑÎºÐÍ¸ÎÎ·ÌÒ¼ÑÌ½ÒÐ»ÒÍºÑÊ»ÒÐ»ÎÎ½ÐÍ¸ÐÌ·ÎÑ·ÐÍ·ÎË»ÏÌ»ÏÏºÒÍ»ÓÎ»ÑÌ¹ÐÌ¹ÑÏ¸ÏÎ»ÎÎ·ÍÏ»ÉÈ°Æ´¶£ofikkrrtzxx~§¬£»¨Ì¦²ç³Àñ½ÆöÄÈùÂÏ÷ÂÎøÃÐùÀÎøÁÌ÷»Ìö½Ëó·Ìï¸Èð·Êó¸Ìø¹Ëú¾ÓúÅ×úÈÛúÌàúÎäúÒçúÚíúÝñúáðÄê¿G÷E ûò{úäö¨ì¥(ú'¸è²ìàækði,ú,ÛæØúæùúéúúíúúñúúôúúôúöþÌõÌ§ö§4ü4ÞóÞúòúÝòÝ3ü3¦ñ¦úìúúîúúíúúïúÖñÖQúQ¼ó¼ðñð¥ò¥*ý*ÅõÅÈøÈGüGþûúùúúöúúöúúóúúõúúõúúöúúòúúòúúõúúùúúóúúöúú÷úúøúúõúúöúúöúúõúúôúúôúúòúúöúúøúú÷úúúúúùúúøúúúúúúúúúúúúúúúúúøúú÷úúôúúðúúîúúçúúãöúÝôúßñúãðúáïúâðúáïúÚìúÛìç-ù)Cö?+ú*íúÜîúÞîúâïrónüØæÐúáñúàñúáòúáïÖàÌQóL¼â°ðØà¥à*÷'»Ý¬0ö-PîGäsËÔ¶öÈÓúÅÖúÁÒú¸Íò·ÊíµÈê¯Àã­¾ß§»Ó²Ë«¼§³¡®¬©¬¬¯¨¨¥ zwlbgtUznYwlYtkYtgUriWrr_{n¦º§³Ç²ÄÈ·ÉÉ»ÌÏ¸ÌÌ¸ÌÎ»ÌÎ»ÊË¹ÍÍºÎÌ·ÌÎ¸ÍË·ÌÊ¸ÌÌ¸ÌÊ¸ÍÍ»ÍÐ»ÍË·ÍÍ¼ÎÐ»ÎÎ¸ËÎ»ÊÌ¼ÌÎ»ÌË½ÎÌ¹ÍÍ·ËÌºÊÌ¹ÌÐ¹ÎÉ·ÎÌ¹ËÊµÍÊºÌÌ¹ÎÌ¸ÎÍ·ÌÊ¹ÎÊ·ÎÉ·ÍÈºÌÇ³ÉÈ¹ÊÌ¹ÇÌ·ËÈ·ËÈ¸ÌË¸ÉÈ·ÌÊ¸ÍÌºÌÊ¹ÊÊ¹ÊÊ·ÊÊ¸ÌÊ¹ËÌ·ÌÈ·ÈÊ¸ÌÊ·ÍÆ³ÇÆ¹ÈÊ³ÈÈ³ÊÊ´ÇÇ±ÊÊ´ÉÇµÈÃ´ÈÈ´ÊÇ´ÊÇ³ÇÆµÇÄ²ÈÃ´ÉÈ¯ÉÇ³ÇÆ´ÇÈµÉÇµÊÄ¶ÆÃ³ÈÆµÈÆ¶ÊÅ·ÆÆ³ÇÆ²ÅÄ®ÅÆ°ÆÄ³ÈÇ´ÆÄ±ÇÅ²ÄÂ³ÄÄ²ÇÃ´ÂÃ±ÅÂ°ÄÂ¯ÄÃ³ÆÁ±ÃÃ±ÃÁ³ÆÄ¬ÆÁ²ÆÀ³ÇÃ¯ÈÄ²ÄÂ¯ÄÁ²ÄÄ³ÄÀ¬ÀÄ³ÆÀ®ÃÁ®ÃÃ®ÄÃ®ÃÁ®ÃÂ´ÄÄ±ÀÂ±ÂÁ°ÆÀ²Á¾°Å¾¯ÂÁ¬ÄÃ³Ã¾¯Ã½­Á½¬Ã¿¯Ä¾¯ÂÀ«Á¾«ÀÀ±Á¾¬Â¾¬À¼ªÁ¾­¾½¬¾½ªÀ¾¥¾¾ªÁ»¯Á¿ª¾¼­À½­ÂÀ¬Á¹ªÁ½§À»¬Á¾¬»½­Ã½¬¾½ª½½®Á½©¾ºª¾½¬½»§¿¼¬¾»«À½¬Ãº«½»©»º©»»§¾¸«»»©¼»«»¹©½»§»¹§½¹©¼¼¬¾»§»¹§»º«»ºª¼¸©½½ª¾·¨½»§¾·¨»¸«¾¸©·¸§»¸¤½¸§»·§º¶¨¶·¨··¦·¶©»¸¦½·¥··£¸¸¨ºµ¨º¹©»·¦»µ£¶¸¨»¶©º»¬¿»­Á»ªÁ¼¬¿¾­Ã¾­Â»­Á¿®Â»¬Á»«Á¼¬Á¿¬Ä¼­Ã»¬Ã¼¯Á»¯Â¾¬Ã½®Ã¿¯ÁÁ­Á»¬Æ¾®ÂÁ®Â½®ÄÂ¬Â¾®ÆÁ¯ÆÁ¯Â¿¯ÂÁ°Å½¯Ã¿¬ÅÁ¯ÆÀ¯Á¾±ÄÀ¯Ã¿°Æ»¬ÃÁ³É¿°ÅÁ­Á¿³Â»®ÅÁ¬ÅÀ®ÈÁ³ÆÁ¯ÅÀ²ÆÁ¬Æ¿¯Æ¾³ÄÀ¯ÇÃ®Æ¿°ÆÂ³ÆÃ±ÃÀ²ÈÁ±ÄÁ³È¿°ÅÂ²ÆÃ°ÈÂ´ÆÀ®ÇÅ±ÇÄ°ÇÁ®ÆÃ³ÆÂ±ÆÄ¯ÊÃ¯ÉÂ°ÇÃ°ÈÁ²ÈÆ´ÈÂ´ÊÅ³ËÅµÊÂ³ÉÇ´ÊÄ´ÊÁ³ÇÅµÈÅµÇÃ¶ÈÇ³ËÃµÌÄ·ÉÇ¶ËÆµËÄ±ÉÆ·ÊÆ´ÊÆ´ËÇ³ÊÇ¶ÌÇ·ÉÆ¶ÊÇµËÉ³ÉÈµÊÆµÌÈ³ÌÅµËÈ¸ÊÅµÍÆ¹ÍÇ¶ÌÈ¶ÌÆ¸ÌÉ·ËÆ·ÎÊ·ÌÉ·ÌÅ¶ËÇ³ÏÆºÌÉ»ÐÈ·ËÈ¸ÌÌ³ÐÅ¹ËÆµÌÈ´ÎÇµÌÇ¸ÐÇ¶ÎÇ·ÎÈ·ÌÈ¸ÎÉ¸ÎÊµÎÉºÎÊ·ÐÊ·ÍÈ»ÊÈ¸ÎÈ·ÏÊ·ËÊ¸ÎÊ·ÎÊ¹ÍÌºÐÊ¸ÎÉ»ÒÍµÎÉ¸ÌÉ¹ÌÊ¼ÎÊ¶ÑË»ÌÌ·ÐÈ»ÌÊºÐÈ¹ÎÎ·ÒÊ»ÌËºÑËºÐÌºÐÉºÒÎºÑÊ½ÎË¼ÐÎ¶ÑÎºÓËºÒÐ¼ÐÌ»ÐÎ»ÕÌ»ÐÌ¹ÐÊ»ÒÎ»ÕÍ¾ÐÌ¹ÑÍ¹ÒÎ¾ÑÐ¼ÐÎ¸ÓÎ¹ÓÎºÕÌ¼ÑÏ»ÓÐ¼ÒÎ»ÔÎ¾ÕÏ¸ÒÐÁÓÐ½ÕÍ¿ÔÐ½ÓÐ»ÕÐ»ÓÐºÒÏ»ÒÍ¼ÓÐ¸ÓÌ¿×Î½ÒÐ»ÒÑ»ÖÎ¼ÕÍ½ÒÑ½ÓÐ½ÖÒ¼×Ò¾ÔÒºÖÐ¾ÓÐ¾ÕÎ¾ÓÒ¼ÔÒ¾×ÐÂÕÒ¼ÕÒ¾ÕÒ¿ØÐ¾ÕÐÂØÕÂÕÐ¿ÖÐ¿ÒÓÀÖÏ¼ÕÏ¼ÖÒ¼ÓÓ½ÖÐ¿ÕÒÀÖÏ¿ØÑ½ÔÒ¾×Ð¾ÒÒ¼ÕÔÁÓÒ¾ÕÎ¾ÓÑÀÒÍ¸Ì¶º©{orouw|| ¡© ¬¤¶¦¾®Î¬¹ï¾ÆöÂÍúÈÑúÆÓúÇÕúÂÒúÂÔúÃÑøÅÒùÂÕõ¾Ðò¸Ëò·Ìõ»Ïú¾ÑúÃÖúÅÛúËÝúÐãúÔèúÙëúßïúæòúæõêæåãèß(û'ñ{úÞóë1ø.ÔâÎúàòtñpýÃêÂúè÷úèúúíúúóúúóúøÿÈõÈúñú¼ô¼&ü&ÅóÅúóúÄôÄ&ü&¼ô¼úïúúðúúòúúòúøñøÚòÚîôîúóúgùg?ü?îõîê÷êã÷ã(þ(ûúøúúöúú÷úú÷úúõúúôúúôúú÷úúôúúöúú÷úú÷úú÷úúóúú÷úúùúúúúúùúúùúúõúúõúúóúúõúúôúú÷úú÷úúúúúúúúúúúúúúúúúùúúùúúøúúóúúôúúñúúðúúêúúèøúç÷úáõúâôúçöúäõúåôúßòÖâÍQôM¼ä±ðàå¥ë*ú(Åã½úàîµë¯þýÖèÎúâðúäòúäóúâòøäîÚäÐîÞàúÙëgîb?ó=á×Ï.ö+'ø$7ô2%÷!£ÞúÌØúÃØúÁÓ÷¹Îñ¸Íî·Êæ±ÁÚ©¹Ö¤¹Í²Á°¶«³¢¯£ª ­±±¯¬§¥qi{nfxbn_lb{n[~n`{rfr¨«Ã³ÁÐºÆÎ¾ÏÐ½ÐÓ¾ÔÐÀÖÒ¿ÓÒ¼ÒÏ½ÓÐ¾ÒÐ¾ÒÐ½ÒÐ¾ÒÒ¼ÕÒÀÒÌ»ÒÒ¾ÓÐ¿ÒÐ¾ÔÐ¿ÑÐÁÓÐÁÐÑÀÓÎ½ÓÑ¾ÏÐÁÔÐ¼ÒÏ¾ÔÎ¼ÐÏÀÓÎ¿ÓÌÁÒÐ»ÒÐ¼ÒÎ¿ÑÍ¼ÑÐ¼ÐÎ¼ÒÎ½ÑÌ»ÑÏ¼ÐÎ¼ÎÎºÑË»ÎÍ¾ÏÎ»ÓÌ½ÐÎ»ÑÍ»ÐÐ¼ÎÎ¾ÑÌ¼ÒÍ¼ÓÎ¾ÓÏ¾ÒÍºÏÎ»ÏÐ½ÐÑ»ÐÊ¸ÐÍ½ÎÌºÐÎ»ÎÍ¶ÏÎ»ÐÌ¼ÐÊºÐÊ¸ÌÈºÌË»ÍÊ»ÑÈ¸ÌÈ»ÍÌºÐË»ÎÉ»ÏË¸ÊÉ¸ÌÉ»ÏÊ·ÍÈºÌÊ»ËÍ¸ÍË»ÎÈ·ÌÊ¸ÊÊ¹ÎÆ·ÌÈ´ÊÊµÍÈ»ÎÇ¸ÌÅ·ÊÇ·ÉÆ¶ËÅ¶ÊÇ·ËÇ¶ÊÇ·ÈÆ·ÉÆ¹ÊÉ¶ÌÆµÉÇ»ÈÇµÉÅ³ÉÅ·ÊÄ³ÈÆ³ÆÈ·ÈÈ´ÊÃ·ÈÈ·ÆÆ¶ËÇ¹ÉÃ¶ÈÃ²ÊÆ³ÇÅ·ÊÆ´ÊÅµÈÆ·ÈÃ¶ÈÃ´ÉÂ³ÇÇ·ÈÆµÈÁ³ÊÃ´ÊÂ¯ÉÃ´ÆÃ³ÈÂµÇÂ²ÈÁµÆÁ®ÇÁ°ÆÀ²ÅÁ³ÆÀ²ÅÂ²ÃÂ³ÄÁ³ÁÁ­Æ¿¯ÆÃ³ÃÁ²ÆÀ°Á¾°Å¿°ÅÁ³ÂÀ¯ÇÀ±ÃÁ³Ä¿°ÄÀ¬Â¿³Å½°ÄÁ²Ã¼­ÁÀ®Á¿°ÃÂ²Ã¼®Ã½°ÃÁ°Â½¯Æ¾°Â¼¯Á¾®ÁÀ¯¿¼¬Ã¼®À¿¯Á¾¬Â¾¬Á½¬Â½¯Ã¾­¿º¯À½­Å¿®Â¹®¿»¯Âº¬Á½°ÁºªÃ¼¯Ãº©Á¼®¾¹¬À»©¾¹¬½»®Ã½¬¿»®Á¹ª¾¹®À½¬Á¸­¼º­À»¬¿¹­¾ºª¿±¥´¸§»º§¼¼£¾¸¤½·©¾¸©¾º¨¾·¥»¹§º¹¦½¸¦»º§¾»«»¸¥½¼§¾»©¾»«»½ªÁ»©¿¼©¾º«»º¤¾¸¦À»©¾¾©¼»©À»¨Á»«½¾§¾»§¾¾ªÁºª¾»¬¾½ª½½«¾½§»»ªÁ¼¬¾¼¬À½«¿»¬Á¼©¾¼­¾¾«¿»«¾½­Á¾­Á»«À¾¬¾¾ª¾¼¨Áº¬À¼¬Ã¼©¿½¬Á¿¦Á¼¬À½­¾¿«¾»®¾¾­Ã¾¬Á¾®Ã¾¬Â»ªÁ¼«Ã½«Á¾«Á¼«À»¬ÂÁ¯ÃÀ¬Á¿®Ã»®Ã¾¬ÇÁ¬ÃÃ¯Ã¿±ÂÂ²ÃÁ±ÆÃ³ÁÁ­ÄÀ¯Â¿®ÇÃ¬Á¾¬ÄÁ­ÇÄ²ÅÃ­Ä¿®ÆÁ­ÄÁ¯ÄÃ¬ÆÁªÇÃ³ÅÁ²ÇÁ®ÃÁ²ÇÂ±ÅÅ³ÄÂ¬ÃÁ¯ÆÄ®ÊÈ°ÄÃ³ÆÂ¯ÇÅ°ÇÃ³ÆÄ°ÇÅ¯ÈÄ³ÇÆ³ÇÆ®ÇÅ³ÄÂ³ÆÆ¯ÈÄ³ÆÂ±ÊÇ±ÆÄ²ÊÆ´ÆÄ²ÆÆ³ÈÄ±ÈÃ®ËÅ³ÈÈ³ÉÆ°ÇÆ±ÈÈ³ÈÈ³ÉÈ³ÊÅ·ÊÄ³ÇÄ³ÈÄ³ÇÇµÊÆµÈÆ²ÈÆ²ÉÆ²ÊÆ³ÇÆµÉÇ¶ÊÅ³ÊÊ³ÊÉ³ÊÈ³ËÇ¶ÈÈ²ÊÆ·ÊÈ·ÊÉ·ÈÈ²ÈÈµÊÈ³ÌÈµÌÈµÌÊ·ÌÊµÎÈ·ÉÈµËÊµÌÈ³ÊÈµÎÅ³ÌÊµÊÊµÊÌµËÇ¶ËÊ¶ÊÊ¹ËÈµÎÈ¶ÊÉµÎÊ¶ÏÊ¶ÎÈ·ÎÉ¸ÎÇ·ÊÌ±ÏÊ·ÎÊ·ÊÈ¹ÏÉ·ÌÊ¶ËÌ·ÎÌºÎÌ¹ÎÉµÐÍ¸ÎÈ·ÍÊ·ÌÎ·ÎÈ·ÎÊ»ÑÈµÏÌ¶ÎÉ¸ÎË·ÌÌ¸ÎËµÏÌºÐÊ·ÐÌ»ÎË¸ÎÎ·ÐÌ·ÌÌ¸ÏÌ¸ÐÎ¸ÏÎ»ÒÏ¸ÑÎ¹ÎÎ»ÒÌ¸ÎÉºÑÐ»ÏÒ¾ÓÏ·ÎÐºÎÎ»ÏÒµÎÎ¸ÐÒ»ÌÎ¹ÏÎ»ÎÏ¹ÎÌ»ÎÌºÐÏºÒÎ¹ÐÑ¸ÑÌºÎÌ¸ÎÍ»ÌÎ¹ÒÎ¸ÌÐ»ÌÊ³É³¸¤|knkooxtzx|¡­²¥¹©Ó©³í»ÂñÁÈ÷ÅÌúÃÊøÁÎ÷¿Ìø¿Í÷»Ìö¿ÌöºËó·Êî·Æì¸Çô·Êø¸ÌúÀÎúÀÖúÆÙúÊÜúÌàúÐæúÖäúÝëúÝìúàìêÛà(ø%çuúÌåôÎÛWìP>ó8rêlùùàÚÔúØìúßòúÜóÿô~ÿíÇêÁÝçÙèäã8ø7iôgÒéÎgõe7ú7êéçúèöúëøúéøúë÷úìúúëúúíùôýÌñÌúïúúîúêóê(ý(÷úïúúïúúíúúîúúîúúíúúîúúíúúïúúíúúðúúíúúëúúïúúîúúóúúöúúöúúóúúðúúñúúíúúîúúïúúóúúóúúôúúôúúõúúõúúõúúñúúòúúóúúíúúîùúíúúéøúäöúäóúÞòúÝñúÝíúàïúàìúàìúÙëøØäÚÞÉîÞÚúØægî`?ó<îÕÚãÝÑýOóHûÖáÉúÙéúßèúÛíúÙèúØèúÙçúÖåâúÌÔ¹ÌÔµ~âpÑÐ´æÌÆ§Û%÷ ºÔ úÄÓú¿Ðõ´Èí´Åè¬Ã©ÁXÙI·È®½§±¡TÁLo¯e£¨©ª¨«ªxo~dx`|z_{r]zoUxdUtgWtkQwqbl«¨Æ²¹È´ÅË¸ÈÊ¸ÎÌ·ËËºÌÌ¼ÌÌ»ÌÎ¸ÌÊ¸ÌÌ¸ËÎ³ÌÎ¸ÎÌ»ÎÌ¹ÌÌ¹ÐÌ·ËÎ»ÏÌ·ÌÎ·ÎÎ¼ÍÏ¸ÍÎ¸ÌÏ»ÍÎ»ÎÎ»ÊÍ¸ÍÌºÍË¶ÌÌ¸ÌÌ¹ÎÌ¸ËÌ»ÎÍ·ÌÌµËË¶ÎËµÌÈ¶ÊÌ¸ÎË·ÍÉµÊÇ»ÊÊ·ÌÈ·ÌË¸ÊÈ´ÌË·ÊË·ÌÊ·ÊËµÊÈ¶ÉÉ¹ÊÉ¶ËÈ´ÊÇ¸ÎÊ·ÊÊ·ËÈºÊÉ·ÊÊ·ÊÉ·ÎÃ³ÌÊµÉÉºÈËµÊÈ´ÊÆ·ÊÈ·ÈÈ·ÊÆµÈÈ³ÈÈ´ÉÅµÇÉµÊÈµÇÇµÆÄ´ÈÇ³ÇÆ³ÉÆ¶ÇÆ³ÉÆ´ÆÅ´ÈÄ³ÇÃ³ÈÄ´ÈÄ²ÈÅ±ÊÅµÄÃ²ÇÃµÆÃµÊÄ²ÆÄ°ÄÂ³ÅÄ±ÇÄ³ÈÃ´ÃÂ³ÄÅ²ÆÃ³ÅÃ´Æ¾²ÆÂ³ÈÁ¯ÃÃ°ÄÂ²ÂÄ³ÅÂ±ÄÁ¯ÆÃ¬ÄÁ°ÄÀ±ÁÀ³ÃÂ±ÄÀ­ÃÃ³ÃÁ°ÄÂ®ÂÁ°ÄÁ¬ÄÁ¯Ã¿³ÃÅ®ÆÁ­ÅÁ°ÅÀ®ÂÁ­ÂÃ®ÄÁ­¾¾ªÁÀ¯¾¾­¾¾­ÄÀ¬¿À®Ã¾¬Á»¯À»¬ÀÁ«¾½¬¾»®½½¬¾¼¯¾¾©¾»­Ãº¬¿¾«½¾«À»¬¾»«¾¿¯Â¼«Á»­¾½¬¿¾ªÀ¼«¾º«½»¬¾º«¾º¨¾»ª¾»«¾»«¿¼«¾½ª¾¹«»·«¾¹¨¿º©¼¼§»¾¬¼º§½º©»»¨»»«¾ºª¼¸ª¼¸©½»¦¾¸¬½¹©¼º§»¹¨½¶¨ºº¦¼µ«¹º«»¸¦»º©º¶¥¹¸§¼¹©»·§º¹«»³§¼·ª¹·§ºµ«»¸§¸µ£º»¥¸º§¹·©º·«»¼¬Â½¬¿¾®Â½¬À¾«Ã¿¯Á¾­Àº¬¾½¨ÁÀ«À»®¿½©Ã¼¯Ã¿°Á¼­Æ¾­ÄÀ­Â¿°Ä¿­ÃÁ¬ÂÁ®ÂÂ°Ä¼­ÃÀ°ÃÁ¯¿Á¬ÅÀ®ÂÁ®ÆÁ¬ÅÀ²ÃÀ°ÃÂ¬ÃÃ®Â¿°Æ¿­ÂÀ¬ÃÂ¬Æ¾­Å¼¬ÄÀ®ÆÃ¬Å¾³ÁÁ®ÄÄ®ÃÀ¯ÅÃ³ÇÂ²Å¿°ÆÁ±ÃÂ­ÅÂ¯ÆÁ¯ÇÄ±ÇÃ¯ÅÁ°ÇÃ¯ÇÂ¬ÅÁ±ÈÀ¯ÅÁ´ÆÂ±ÈÃ±ÈÄ³Æ¿¯ÆÂ²ÇÅ²È¾³ÈÃ°ÈÃ¯ÈÁ®ÇÅ±ÊÃ³ÇÃ²ÈÅµÈÃ´ÊÆ²ÊÁ±ÉÅ³ÉÅ³ÈÅµÌÆµÊÆ³ÊÃ´ÈÆ³ÈÂ´ÇÅ´ÈÈ²ÉÄ²ËÄ³ÊÇ³ÈÃ²ÊÆ·ÊÇµÌÇ´ËÇ¸ÈÆµÊÈ²ÌÇ¶ÆÆµÊÈ´ËÈ´ÍÇµËÈ·ËÈ³ÌÈµËÈ¶ÊÇ¶ÌÊ»ÍÊ¹ÍÉ¹ÍÇ¹ÐÇ³ÎÊ·ÍÊ·ÍÃ´ÍÇ¶ÊÊ¶ÌÊµÌÉµÎÆ´ÊÅ³ÊÊµÎÈ¸ËÉ¸ÐÌ·ÎË·ÎÉºÎÌ·ÌÉ¹ÐÊ¹ÎË¶ÏÈ·ÏÈµÌÌ·ÎÉµÎÊ¸ÐË·ÐÈºÏÊ²ÎÉºÎÉ¶ÎÌºÏÌ·ÐÈ·ÌÊ»ÎÉ¶ÏÌ¶ÑÆºÏÎºÐÌ¼ÑË·ÏÊ»ÔÐºÑÌ»ÏÊ¶ÐÎ¸ÒÌ»ÒÌ½ÓÍ»ÔÊ¸ÐÍ¹ÒÌºÒÌ¹ÐÊ·ÑÌ»ÑÌ·ÒËºÏÍ¸ÒÍ¹ÐÍ»ÒÊ»ÑÎ¹ÒÍ¹ÒÌ»ÐÎ·ÐÐ¼ÒÏ¼ÐÌºÓÌ·ÐÎºÒÎ·ÒÐ½ÒÐºÓÐ¾ÓÎ»ÐÐ½ÒÎ¹ÑÐ¾ÖÑ¿ÒÐ»ÔÒ»ÓÌ½ÓÍ¹ÓÐ»ÕÐ¾ÓÎ¿ÕÐ½ÔÒ¹ÓÐ¼ÒÒ¼ÔÐ¿ÒÏ¼ÕÐ¿ÕÐ½ÕÒ¼ÕÒ¿ÓÑ¿ÓÎ½ÓÑ¿ØÏ¿ÓÍ¾ÓÒ¹ÕÓ¿ÓÐÁÖÓ¾ÓÐ¿ÖÏÀØÖÀÖÓ¿ÒÑÀ×ÒÀÕÖ¾ÖÐÀÓÒ¿ÕÒ¿ÕÑÁÖÒ¿ÕÐ½ÓÒ¾ÒÔ¼ÕÑ¼ÖÒ¿ØÕ¿ÕÔÁÕÔÁÓÐ½ÕÕÀÖÓ¿ÕÒ½ÓÐ¼ÑÀ¦À¤­{¢uuuu~~¢¨¬¦·«¾°Ù¬»ñÀÉ÷ÁËøÈÐúÅÑúÁÒ÷ÁÏúÀÐù¿ÑøÀÐøÀÏõ¼Ìò¹Ðï¼Ìò¸Îú¾ÒúÁÕúÇÛúËàúÍãúÐäúÖçúÙéúÞîúÙïúÙëêÒÝ(÷%ãuú¾ßú¾ÞôÃÜ|àn,ö(\ëT5õ1äÕØúÑëúÕìÿ·ë°ÿüûû`ð\ìÜâÑáÉ-ù+(ù&.ù-ÐèÉúæóúèòúèõúé÷úëöúê÷úîù÷ÿÈòÈúîúúðúúòúêòê(ý(÷úïúúðúúïúúñúúðúúïúúïúöñöúòúúïúúïúúðúúîúöñöúñúú÷úúøúúùúúòúúôúúòúúðúúðúúóúúòúúóúúöúúôúúôúúôúúòúúôúúóúúïúöïöúíúúìúúéúúç÷úäõúßñúßðúßïúàïúãïúàîúÙíúÜéúÛæúØäæúÌÚ¼øÓä9õ3 útëkü¨äêÝÝúÜèúÙëúÕêúÓèúÔçäÿÈÙ´úÊßãÌÈáÉÅúÂØúÇØÞÍ¿5ô-¡ÜúÈØú¾Óø½Ìò·ËÒu(ò"<æ3&ï zÇmÀ­¡ì&æ#%ç"NÇI«¬¬ª°¬{llzldqg{r_|nbzo`wgx³ °È³¿Í¾ÈÒ¼ÍÐÁÒÓ¾ÐÒ¼ÒÏ½ÒÑÀÓÎ»ÐÍ¾ÒÐ¼ÔÐºÎÎ¼ÒÎ¾ÐÓÀÒÎ½ÐÓÀÓÒÁÒÎ½ÔÐ¿ÒÒ¾ÓÐ¿ÒÒ½ÖÒ¿ÑÐ½ÕÐ¿ÐÑÁÒÒ»ÑÐ»ÏÐ¹ÑÎ¼ÑÍ»ÏÐ¾ÒÒ»ÒÍ¿ÒÐ¾ÐÌ»ÏÐ¼ÒÌ¿ÑÐ¾ÒË·ÐÍ¾ÑÎ¼ÐÍ¿ÒÍ»ÏÌ»ÒÎ¿ÐÍ¼ÐÍ»ÑÎ¼ÓÐ¾ÒÌ¿ÐÎ¼ÑÎ¼ÏÍ¼ÒÍºÐÍ»ÌÍ½ÑÌ¼ÐÍ»ÏÏ½ÒÍ¼ÐÍ½ÎÌºÌÌ»ÒË¹ÎÍ»ÑË·ÍË»ÏÌ»ÎË¹ËÈ¹ÍÈºÎÎ¹ÎÊ·ÎÊ·ÍÈ·ÌÊµÍÊºÌÊºÐÊ·ÐÈºÎË¸ÌÉ¸ÎÌ¸ÌÌ¹ÎÉµËÇ·ÌÊ·ÍÊ¹ÌÊ¹ÌÆºÉÊ»ÌÌ¹ÌÈ·ÊÇµËÈ·ÊÈ¶ÌÈµÌÆ¶ÊÆ¶ÈÇ¶ÊÆ·ÊÆ¹ÌÆ¶ÈÇ¶ÊÇ³ÈÈ»ÊÄ·ËÅ³ÈÆ·ÊÆµËÄµÈÉµÈÅµÈÅ´ÆÅ²ÊÆ³ÈÇ·ÊÅµÈÃ´ÈÆ³ÈÅ´ÊÅ±ÉÆ¶ÉÃ¶ÇÅ³ÈÂ·ÊÁ²ÆÆ·ÆÃ¯ÆÂ´ÆÁ³ÈÂ¯ÅÇ¶ÃÂµÇÃ®ÃÃ±ÇÂ²ÈÁ¯ÃÁ±ÄÁ´ÄÅ±ÆÁ¯ÆÂ°ÅÂ±ÇÂ¯ÅÀ²Ã½®ÆÀ³ÁÂ³ÄÂ°ÆÂ¬ÃÂ°ÃÀ´ÄÁ±Å¿®ÄÆ²ÃÁ°Â¿®¿Á¬ÁÁ°Ã¿®Á¾±ÂÀ®Ã¾¯ÀÀ°Æ¼®Ä¿­Á¿°Â½°Å¾«Á¾±ÁÂ¯ÂÀ®Ã¾³Å½°Â¾«Ã¾¬Á½©Á½­Á¿¬Â¿°Â»¬¾»­¾»­Å¿­¿»®Á»¬¿¾ª¾¹¯Â¼¬Á»ªÁ¼¬Áº­À¾­¾»ª»¼°¾¼¯À»¬Áº©¾¾®¾»®Á¹¬Á­¢³»¥º·¥¸»¥¼¹§º·§¼»¦»»§»·§ºº©¸·¥¾»©¾¸ª¼·§¼¼¨»·©½»¨¾¸©»·©»½¥¾»«½»ª¾¾¨º¼¨Àº«¾¼©¾¼¥¾º©½¾©½¸ª¼¸¨¾½¨¿º©¿º©½»§½¾ª¾¹§¾½ªÁ½«À»«¿»ª¿»­À»§¾º­À¾§½¹§Á»«Á»¬Á»ªÁ»­Áº«¾¾«Ãº¬¾¾¨½¾¬¾½¬¾¾­Â»©Â¾¬¾¿­Á¾«Â¾¬Á¾¬Â¿¬À¾ªÃ»ªÁ¾¬À»ªÃ¾®¾¾­Ä¾­À¿°Á¿­Ã¾¯Ã¾®ÄÀ­ÂÂ®ÅÀ¯ÁÃ®ÂÀ°ÃÂ°Ä¿±ÃÃ°ÅÁ°Ä¿¯Ç¿­ÆÁ°ÄÁ³ÄÄ±ÅÁ®ÃÁ¯ÅÃ®ÃÀ¯ÆÂ°ÆÃ²ÇÂ®ÄÀ¯ÄÃ°ÇÂ²ÅÃ°ÅÃ³ÆÆ²ÆÃ²ÄÄ²ÆÃ³ÉÂ°ÅÂ°ÃÄ±ÆÃ±ÇÃ·ÆÆ±ÈÁ²ÆÁ±ÇÄ®ÉÆ²ÊÃ´ÆÁ°ÄÃ°ÆÃ²ÊÄ¯ÊÆ³ÇÅ®ÆÇ±ÇÂ²ÉÅ³ÆÃ³ÊÈ°ÉÄ³ÉÈ²ÈÈ¯ÊÄ¶ÉÃ±ÉÇ¯ÈÄ³ÆÆµÊÆ´ËÃ¶ÆÈ°ÇÃ±ÇÆ°ÉÄ·ÉÇ³ÉÆ°ÈÆ¶ÊÇ³ÊÈ´ÇÆ¶ÈÇµÊÆ·ÈÇµÊÆ·ÌÈ´ÌÆµÉÅ·ÊÇ³ËÈµÊÆ³ÊÇ´ÌËµÆÆ·ÉÇµÍÇ·ËÈ³ÌÆµÌÈ³ËÇµÈÆ³ÊË·ÎÊ¶ÌÈ¶ÊÇ³ÌÈºÈÈµÐÊ´ÎÈµËÈ²ÌÈ·ÎÉ´ÈÈµÌÈ°ÌÊ·ËÊµÊÊ¶ÌÈ¶ÌÊµÎÊ¶ÍÇ·ËÊ¸ÎÐ·ÍÈ·ÌÈ·ÎÌ·ÐË·ÎÈ·ÊÉ¸ÍÌ¶ÎÈ¶ÍÌ¹ÎËµÉÈ·ÊÌ·ÐÈ²ÌÌ³ÎÉºÏË¸ÐËµÌÌºÎÌ·ÎË¸ÌÌ¶ÎË¹ÍÌ¶ÌÍ¹ËÌ¸ÎÌ·ÎÎ½ÒÐ·ÏË»ÏÊµÍÏ·ÐÐ¶ÐÌºÏÏ¹ÎÌ¹ÐÌ¹ÎÌ»ÐË·ÎÏ»ÒË»ÏÊ³ÌÍ»ÑÎ»ÎÐ½ÐÌ¹ÎÌ¹ÎÌ¸ÓÍ·ÐË»ÐÐ¸ÒÌ·ÍÎ»ÌÁ¬¾¥­xqokqr{zxz~§~«µ¡»ªÓ©´î¿Ãó¿Èò¼Äõ¾Êö¼Ìõ¾Ìö½ÌôºÊö½Èõ»Èò·Êë³Æì´Çó³È÷·Ëú¾ÑúÆ×úÈÖúÉØúÌÛúÎáúÓÝúÐàÿúËÛêÈÍ(õ#|Ûkò¶Òâ²ÉnÛb¤Í¼Í©6ñ0räeúÃàúÄÜúÊáúÉâÿÚÓÃÁÖ­ÁÐ«ÁÌ¨ÚÉÁø¿ÖúÁÛèÅÍ³×èËÍúÎßúÏàú×áúÙéúÛæúßèÿï{ÿðÇèÀÝèØøèôúé÷êêê(ü'ô}úéúúêúúëùúæúúçøúéúºî¹dõd¸ñ¸úêúúéúúéúºïºdúd¸õ¸úìúúñúúñúúðúúìúúëúúêúúêúúêùúêúúëúúðúúïúúðúúíúúìúúìúúéúºîºdõc¸èµúáòúâñÚãÏéêvç¢äáÚÍúÕãúÔâúÌàúÇÛúÅ×Ü{ÿÈÎ§úÀÕ¹Ð(ö#úûþ:ò3ºÖ¥úÈÚúÌÛúÈÖÿÞpÿÖÃË§ÙÃºÈÇªOèC¦ÉÈ¿­}Ûg*ô"ÓË¯ø¿Ë÷»Ëò°ÇÌ¼§Kå=©¿Ôª³Ãy"í®4Ý/7Ø2 y}Y¾Q§ª««wol|]{q_wzf|n[td[rfYoiQqk]|q§©À­¹Ê¶ÃÊ·ÊË·ËË»ËËºÌÊ·ÌÊ¹ËÌ¹ÌÊ·ÌÊ¹ÊÈ³ÌÊºËÈ¸ÈÌ¹ËÎ»ÊÊ·ÊÊ¹ËÌ¶ÊÊ»ÌÊ»ÌÌ·ÎÌ¹ÎË¾ÎÏ»ÌË»ÌÍ»ÌÊ»ÏÎ´ÌÊµÊÊ¹ÊÉ¸ÍÊ·ÊÊ¹ÎÈ·ÊÊºÌÊ¸ÎÊ·ÈË¹ÉÊ¸ÊÈµÊÇ·ÊÌ·ÊÉ·ÉÈ»ÈÉ¸ÊÈµËÊ¶ÉÊ¸ÌÈ·ÌÊ·ÊÊ»ÌË¹ÊÈ¶ÌÉ¸ÈÉ¸ÊÈµÊÊ·ÈÇ·ÈÊµÉÇ¸ËÊµÈÇ·ÆÇ·ÊÊ³ÈÈ·ÉÄµÈÈ·ÈÇ²ÈÆ´ÊÆ´ÈÆ²ÈÅ³ÇÄ³ÆÇµÉÃ¶ÈÅ·ÈÇ³ÈÅ³ÇÆ´ÃÆ³ÉÃ´ÆÄ³ÆÇ´ÄÄµÆÄ²ÉÄ³ÃÆ¯ÄÂ±ÇÂ´ÆÅ®ÆÂ´ÈÄ³ÃÅ³ÆÃ²ÄÃ´ÄÂ±ÆÅ²ÆÄ³ÆÃ±ÈÂ®ÄÅ²ÄÃ°ÂÃ®ÈÃ±ÄÃ°ÃÂ±ÄÂ´ÁÀ³ÁÁ¬Æ¿°ÁÁ³ÄÂ±Ã¾±ÂÂ®ÄÁ°ÆÁ°ÂÃ²ÂÄ¬ÁÁ±ÂÀ±Á¾¯ÁÀ²ÂÀ®ÁÀ°Ä½¬¿¾¯ÁÂ­ÁÀ®Á½­Á¾«ÁÀ¯¿¼¯¿»¬À½¬¾½®Â¼­¾¿¬¾»®¾½¬¿ºª¼»©ÀÀ¬¿½¬¾¼¬¾¼©¿»©¼¿°À¾®»¸«Áº§¾»ª¾¹®Â¾°¿¸¬¾¼¬¾¼«À¹«¾½«»»¨¾º¯¾¸«½º¨½»¬»º©¾¾«¾¸©»»ª»»«½¸«»·©»½¬¾¹©º»¬º¸¨½¸«»º©º¸¥¾·©»»©¹·©»¹©¼·©»»¦¾¹¬¹ºª»¹§»¸§»¶¨¹¹¨¼·£¹´ª¸·«¸´§»·¤¼´ª·¸¡»³¦·´§»¸¨¸µ§º·¦¶¶¥ºµ§·³¨¹¾®¿»¬¿¾¯Â¼¬¿¹ªÁ¾°Ã¼¬Áº¬¾Á¬Áº¬Ã»¬Â¾±ÀÁ¬ÂÁ«ÁÀ®Á¿°ÄÀ¯Ã¾°ÂÁ³ÃÀ¯Ã¾¯Á¾°Å¿¯ÁÁ¬ÂÀ®Ã¿­Ã¿¯Ä¾®Ã¾®Ã¾®ÀÁ¯ÆÁ°ÈÀ³Ã¿±ÆÁ®Ä½¯ÄÀ°ÅÁ¯Æ¾¯ÃÂ¯ÄÀ²Ã¾®Å¿±ÅÂ­Ä¾®Ã»°Ä¿±ÃÁ°Æ¿®ÄÃ±ÄÃ¯ÆÀ²ÃÂ³ÈÃ³ÈÁ³ÃÄ°ÉÄ±ÇÁ³ÄÂ®ÈÃ³ÅÂ³ÄÃ¶ÈÅ±ÆÀ¯ÆÃ³ÊÄ·ÈÂ¯ÆÀ²ÆÇ¯ÈÃ±ÈÃ·ÈÆ³ÈÄµÉÈµÊÅ³ÈÃ³ÈÈ±ÈÆ´ÊÅ³ÈÃµÃÆµÌÅ²ÈÆ³ÊÆ¶ÇÃ±ÊÅ´ÌÃ´ÅÇµËÅ³ÌÇ·ÌÄ¶ÈÇ¶ÊÉ¶ÍÊ¶ÊÆµÈÆµÌÈµÊÇµÍÆµÊÅ¶ÎÆ´ÍÆµËÇ·ÈÅµÌÇ·ÌÉ·ÌÉ¶ËÈ¶ÍÌ¶ÉÊ¶ÏÇ¶ÊÅ¸ÎÊµÎÈ»ÌÈ¶ÌÉ·ÎÊ´ÎÈ¹ÌÈ³ÍÈ¸ÎÈ¹ÐÈ¹ÏÌ¶ËÈ¹ÍÇ¸ÐÊ·ÐÈµÎÈ¹ÏÈ¶ÍÉ»ÌÉ·ÎË¸ÎÊ»ÐÌ¹ÎÌ¹ÒÆ¹ÎË¹ÌË¹ÐÊ¶ÎËºÐÌºÎÌ¹ÐË¹ÎÍºÏÌ¹ÌÉ»ÌÍ¹ÑÈ»ÐÌ¸ÎÍ½ÒÌºÑÎ½ÎÌºÑÌºÒË»ÏÎºÐÍ¹ÒÎ¸ÏË½ÒÏ¹ÓÌ»ÒÐ¼ÐÎ»ÐÌ·ÒÐ»ÎÏ»ÑÎºÒÐºÏËºÐÌºÒÎ¼ÍÌºÒÐ¹ÓÌ»ÑÍºÒÎ»ÕÎ»ÐÎ»ÔÍ·ÐÐ·ÑÐ½ÓÎ»ÒÏ»ÓÒ¾ÒÒ¼ÓÐÁÔÐºÒÎ¼ÒÐ¿ÖÐ¿ÔÐ½ÑÏ½ÒÎ»ÒÐ¾ÕÒ»ÓÍ¼ÔÐÂÒÎ¼ÔÎ»ÒÎ»ÒÒ¼ÔÎ¿ÕÍ¾ÕÏ»ÖÑ¾ÓÐÂÕÐ¾ÕÑ¹ÏÒ¼ÕÍÀÒÒ¾ÑÏ¾ÖÒ½×Ð¾ÕÐÁÕÒ½ÕÒÀÕÎ¾ÒÐ¼ÖÐ¼ÓÎ¾ÖÓ¾ÕÓ¾ÖÐÀÓÔ½ÕÒ»ÔÒ¾ÔÎ¾ÕÕ¼ÕÓÁØÕ¿ÕÓÀØÒÁÔÔ¿ÓÒÁÕÑ½ÕÒÀÕÖ½ÖÒ½ÒÒ¾ÐÈ±Ä¬´¤{xxz{¢{§ ® ²¥¹¨Æ¡µÝ³½ôÂÇöÅÎøÄÌúÅÒúÄÕùÁÎùÄÒø¿ÑøÀÍø¿Ëõ¹Îð¸Íò»Îö¾ÑúÁÓúÅØúÊÜúÍßúÊÞúÌßúÊÜúËßÿúÁÙÿíºÐuÞg¯Ëï·Õí³ÐÓ.ò(&õ Iì>ôÄÖúÅÞøÃÜùÂÜúÃÛúÀÛö¾Öõ»Óõ´Óï³Òî±Òí´Îô¹Òï·ÑîµÐí´Òô·Ñø¼Õ÷ÃÕúÊÚúÍÛÿ·Þ¨ÿüüü`ô\ìèçúçöòæïxôvµîµúêúúìúúëúúëúúéúõ-ü-CùC+ü+õúìú÷-ü-CúC+ý+ùúõúúõúúóúúòúúðúúïúúîúúïúúíúúíúúîúúðúúðúúòúúíúúíøõ-û+CùB+ú+îúßïºç±OôK(ù%ú5õ0ôÓÚúËßúÈÙöÀØÿvÙhÿÐ·ÁÌ¾±ê¶ËàÁ¾ÑÇ³Ú~ù»Ð£òÇÓ÷ÅÔöÃØÿ¯Íÿùøù]æSçÀÆØw(ò#$ñ!'ñ#ÆÄ«õÁÎõ¾Ëô¾ËóºËí»ÃÎÁ°Ýµ¹â¬½[ÜN7ç0¯¦%è#'æ%ó$ç"®­®® ³¬ {|wk{dokr`wldl`zn]xxi{±¬Ã´¼Í¾ÈÏ¾ÎÎ¼ÎÏÁÐÏ¾ÒÒ½ÑÒÀÒÎÀÕÐ¾ÑÎ¾ÐÎ¹ÐÒ½ÏÎ¼ÑÎÁÎÐ¾ÐÎÁÎÑ¼ÒÐÁÓÍ¾ÐÎ½ÓÏ½ÓÎ¾ÒÏÁÓÐ½ÓÐ¾ÒÏÂÒÐ¾ÓÐ½ÒÐ»ÐÎ»ÐÐ¾ÒÌ¾ÐÍ½ÒÏ¾ÐÏ¿ÐÍºÒÎºÐÐ½ÎÏ»ÑÎ½ÐÍºÐÐ½ÐÍ½ÐÌ»ÐÐ¿ÎÎ½ÐÎ¾ÐÐ»ÒÐ»ÒÌÁÒÌ¿ÐÐ½ÒÏ»ÐÎ¾ÐÐ»ÎÊ»ÒÎ¾ÐÐ¼ÐÏ·ÒÊ½ÌÎ»ÐÍ½ÎË¼ÍÌºÎÐ»ÎÌ¹ÐÌ·ÌË·ÍÌ¹ÐÌ¸ÎÊ·ËÇ¸ÌÌ¾ÎÌºÐÊ·ÌÊ»ÍË·ÐÊ¸ËÈ·ËÉ·ÍÈ»ÌÌºÎÌ¹ÌÆ·ÊÉ¶ÉÇ·ÊÊ¶ÉÆ¹ÍÊ¹ÎÌ·ÍÈ»ÊÉ·ËÉ·ÌÊºÈÆ·ÊÊ·ËÊµÌÈ¹ËÄ¶ÉÆ·ÇÈ¸ËÈ»ÌÇµÈÅ´ÇÇ¶ÌÄµÉÆ¸ÊÇ·ÊÆ¶ÊÆ¸ÊÄ·ËÅµÇÇ·ÉÇ·ÊÆµÊÇ·ÊÆ³ÉÃµÊÇµÈÃ·ÈÅµËÇ³ÈÂ¶ÇÅ³ÊÃ³ÆÃ·ÈÇµÇÅ²ÊÃ³ÃÃµÈ¿²ÆÀµÆÃ¶ÈÀ±ÅÁ³ÈÁ³ÇÅ®ÉÁ´ÃÀ²ÆÁ±ÃÁ³ÅÂ¶ÇÁ®Æ¾³ÆÂ±ÆÁ°ÆÃ¬ÃÁ±ÀÂ³ÂÁ¬ÂÃ±ÇÁ°ÅÁ´ÃÀ³ÀÂ³Ä¾°ÆÀ¯ÆÆ¯ÆÁ­ÃÁ³ÁÂ¯ÅÂ¯ÁÀ±Ã½³Â¿³Á½¬ÁÁ®ÃÁ°ÄÂ³ÄÀ­Â¾²Ã½®¿¿¯Â¾±Ã¾¯Â¾²¾À¬Ä¾¯Â¾°¿Á°Á½¯¿¾®ÃÁ°Á¿©Á½®¾¾®Á¿¬¿»¯¿»°½¼®À¼­¿¹«¿½®¿º¬À»¯¾½ª½¼¬¾½¯¾¼¬¿¼±¿»¬Á½«À»¬¿®¥¶·£»º¦½»¦¼·¤·¸¨¾·¦»º¬¾º¤ººª»»¥¾»§À¸©¾·©»ºª½º¥¾¹¨¾»¥À¹¦¼»«½»§»¸¥»·¬¼¼©Áº«½»¨º»¬¾¸«¾¹¨¾»ª¾¹§¿º«¾º©¾¹«»¸©¾¾¤Á»§¾»«½½©À¼­»¼®Á¾ª½ºª¿¾ªÁ»©¾¾¬¾¹¦¾»°Á¼§Á½­À½®¿½ªÁ¾©Á»¬À½©¿»¬À½­¾¿¯Á½«Â¾­Á¾¬Á¾­À¾¬À¾®¾¿¬Ä¼¬Á½®ÁÀªÂ¿¬Â»«Á¿¬¾Á®ÁÀ­ÃÀ±ÃÁ¬ÀÂ°ÄÃ®Ä¾¬Á¿®Ä¾¯Ã¾¯ÄÁ¯ÄÀ²ÂÂ®ÁÃ¯Ã¾²ÄÁ¬ÄÁ¯ÄÁ°ÆÃ®ÆÀ°ÅÁ°Æ¾®ÇÁ®ÄÁ²ÅÄ¯ÅÂ®ÆÁ³ÆÃ±ÆÃ³ÆÄ°ÄÃ´ÇÀ±ÈÂ²ÇÄ¯ÇÃ²ÇÂ²ÄÃ®ÆÅ°ÆÆ´ÅÇ°ÇÄ®ÉÄ¯ÆÃ°ÈÅ²ÊÁ°ÆÂ°ÇÃ¯ÈÃ³ÆÃ³ÈÃ³ÈÄ·ÄÆµÅÄ­ÆÃ²ÉÅ±ÄÈ²ÈÂ²ÇÄ¶ÉÈ³ÈÈ°ÇÅ´ÍÇ·ÌÆ³ÊÃ³ÊÆ²ÌÆ¶ËÄ°ÆÆ´ÆÄ°ÈÃ´ÌÁ´ÈÈ³ÉÃ°ÈÇµÊÊ®ÉÆ³ÊÈµÊÉµÉÇ±ÈÅ±ÉÈ³ÊË´ÊÇ²ËÇ³ËÆ´ÇÆ³ÈÊ´ÊÇ°ÈÉ¶ÌÊµËÇ²ÌÆ³ÉÉ·ÍÉ´ÌÆ³ÇÈ¶ÊÉ´ÈÈ´ÊÈ´ÌÇ³ÉÊ·ÏÉ¶ËÈ·ÎÈµÌÍ¼ÌÈ¶ÍÉ´ÌÊµÊÉ·ËÊ·ËÇ³ÌÌ´ÉÊ·ÍÊ¹ÎÊ·ÌÉµÌÊ¸ÌÊ·ËÉ·ÍÊ·ÏÊ»ÍÊ¸ÎË¸ÎË¸ÍÊ·ÎË·ÍÉ·ÎÉ´ÍÊ¸ÍÉ·ÎËµÎÊ·ÏË·ÐÌ»ÐÌ¸ÎÊ·ÌËºÌË·ÍÉ¸ÌÊ¹ÏÍ·ÎÌ¸ÏÎºÐÎ»ÎÍ·ÎÊ·ÐÊ·ÎÌ¶ÌÌ»ÎÏºÍÍ»ÒË¸ÐÌ»ÎÎ·ÐÌ¸ÏÐ»ÒÌ¹ÏÌ¸ÏË·ÎÍ»ÐÏ»ÎÐ»ÒÍºÐÎ»ÐÎ»ÒÊ·ÒÊºÎÍºÏÌ¹ÓÌ¹ËÁªÄ¬®~¢ttrwu||wz~® °¤Á¢®ß°ºî¾Àð¿Çó¼ÈöÀÊ÷¾Ì÷¾ÌõºÊõ½Êô½Èô¼Ëð·Éì²Çí²Èô¹Êø½ÌúÃÏúÅÒú¿Òú¾Òø»Ðõ¹Ïï³Ìè¯Ìÿå­Ëæ®Ëà©Æâ§Æã¥ÆßªÆä¯ÈÊ¸°­ÇÞ²Çæ´Êë·Ëî±ÍêµÎç®Éá«Ê×¢ÃØ¤ÁÎÀÏ½Í½Ð»Ê»Î»Ò½Ì¸Ì½Ê¿Ð½ØÃØ¦Áà¬ÈÿÑÃµÁÏ£ÁÖ§ÁØ¬ÚØÄøÕàúÜçúÜìøÛíúÜîúÜïúÝïúáòúàñÖæÑQöP¼í¸ðæí¥î¤*ú*¨î§QöQ¼ñ¼ððð¥÷¥*ý*ÅôÅúòúúòúúíúúêúúíúúíúúêøúæ÷úäøúæùúé÷úæ÷úåöúáõÖäÐQóN¼ç±ðÛã¥ä*ù'ÅÞ¶øÑãîÐÖwåhýÑË³ö½Óó·Îè«Èÿ ¹ÿ÷ööNØG¿£­ÌºÖª»´¶¡\ÜRÎ´²æ°ÆéµÆé´Êæ¬ÊÿÂ²ª¯º«¹¥»¾¹­å³Èë·ÈÊµ«¼Ä¥®Õ¬Àä¬Àã±Àç´Àë°Ãê±Àä²¾à®¾Éuö¦®­ ÷ìy¥oGÊ?!ç§¬©¨¡xi{ndo`xgYuoYrkWrkYtiYto]u®¬Ä³»É¶ÄÆºÊÎµÊÉ·ÊÊ¸ÈÇ·ÈÌ»ÉÉ¹ÊÉ¶ÈË·ÉÉµÊÈµÊÈ·ÉÉ¸ÈÌºÈÈ´ÊÊ¹ÈÊ·ÊÊ¹ÊÌ¾ÊË·ÎÈ¸ÎÎ»ÈÌ¹ÌÎ»ÌËºËÌ½ÎÌ·ËÊ¶ÊÉ·ÈÈ·ËÈ·ÉÈ·ÎÈ·ÍÉ¹ËÇ·ËÊ¸ÊÊ·ÌÈ·ËÈ·ÊÊ·ÈÊ·ÊÊºËÈ³ËÇ·ÉÈ·ÊÊ·ÊÈ·ËÈ¶ÉÉ·ÉÊ´ÈÊ¹ÈÌ·ÉÉ·ÌÊ·ËÆµÈÆ·ÊÇ·ÇÌ¶ÊÉµÈÈ·ÉËµÊÇ³ÉÊµÈÈ·ÊÆ±ÇÇµÆÆ³ÊÆ°ÇÅ³ÉÆµÆÅ·ÉÃµÊÆ³ÇÆ²ÆÅµÈÅ³ÆÆ±ÊÄ·ÈÂ·ÇÃ³ÆÆµÅÆ³ÈÆ°ÅÃ±ÂÃµÈÃ²ÉÄ´ÆÄ²ÇÂ´ÈÇ¶ÅÆ³ÆÁ±ÆÁ±ÆÆ¶ÆÃ²ÆÂ­ÃÁ³ÅÃ°ÇÃ°ÃÀ²ÄÁ³ÄÁ°ÈÀ³Ã¾°ÆÃ°ÁÁ³ÆÀ³ÄÃ²ÁÀ°ÃÃ°ÆÁ°ÃÂ°Ä¿³ÇÄ²ÃÂ­Ä½°ÃÃ¯ÂÁ¯Ã¿¯Á¾±ÅÂ¯ÁÁ²Á¼®ÁÁ¬Á½³ÃÁ­ÁÁ®Á½¬Á¼­ÀÁ¬Â½®À»¬Á¿°À»®Â¿®¾À¬Â¹®Â½°¿¿¬Â¿«¾»®Àº­Á¼©½¿­¾¾¬¿»«½½©¾»«¿¾«¾»¬¾½¬¾»«Á»­¼»©¾»§¾·¬¾¹¨¿¼¬½ºª½»ª½»«¾½«»½ª¾¸ª»ºª½»¬¾¼«¼·¬¾»«»·©¾»¨Àº®½º©Àº¬½¸ª»¸©¾»§¼¸©»·¨½º¨¼·©»º­»¹§»·¨¸·¨¼»ª¼¸¨¸·©¼¶§º¸§»³§º¸§¼·¥ºµ¦··¥»¸§»³¦¶¸¨¸·¨º³§º·§··©º´­»¾­ÁÀ¬À¾¯Á¿¬¿¿ª¿¼¬ÁÀ­Ã½­À¼¯¿À«Â¼«Â¾­¾¿²ÄÀ­Â¾¬Á½°ÂÁ«Â¿¯À¾±¿¾¬ÃÁ­ÃÁ¯ÆÀ¯Â½®ÁÁ¯ÅÁ³ÄÁ³Ã»®ÁÁ¯ÂÀ¬Å½²Ã¾¯Â¾®ÃÁ®ÂÀ¯ÅÀ®ÄÁ²ÃÂ¯Ã¾²ÃÁ°Æ¿®ÇÀ¯ÄÀ¯Ã¿°ÂÁ²ÇÃ¯ÄÀ³ÉÁ°ÃÀ®ÂÁ°ÆÆ¯ÆÁ°Å¾´ÆÄ³ÅÀ¯ÅÀ³ÃÅ³ÅÂ°ÈÃ²ÅÁ³ÇÂ±ÈÁ±ÄÃ±ÇÃ²ÅÁ³ÆÄ·ÇÃ°ÆÀ³ÆÃ³ÇÃ´ÈÅ±ÆÃ³ÈÅ³ÆÅ±ÊÂ¶ÅÆ±ÈÃ²ÃÄ¶ÊÆ´ÇÃ´ÆÅ²ÉÇ·ÊÆ¶ÉÆ²ÊÄ¶ËÅ²ÊÈ³ÊÅ´ËÆ´ÇÆ´ËÈ´ÊÅµÈÈ·ÈÈ³ÈÈ±ÈÅ¶ÊÉ·ÊÊµÌÅµËÆ·ÉÈ¹ÌÆ·ËÆ¶ËÈ³ÊÇ¶ÍÄºÊÆµËÇ³ÌÇºÉÊ¶ËÇ¶ÊÇ´ÈÉ·ÎÉ·ÊÈ·ÊÊ·ÎÉ³ÍÉ¹ËÇ¶ÍÇ¸ÎÉ·ÌÍ·ÌÈ¹ÌÆ¶ÍÍºÍÌ»ÍÈ·ÎÈ¹ÌÊ¸ÏÌ¸ÏÊ·ÎÊ·ÍÊ¶ÌÌ»ÐÉºÎÉ»ÎË¹ÐÊ»ÌË·ÐÈ¸ÌÉºÍÍ·ÎË·ÌÊ¹ÍÌ¹ÏÍºÌË¸ÑÊºÏË·ÐÍ»ÎÌ¹ÒÎ¸ÐË¼ÐÎ»ÒÌ¹ÐÈ¹ÎÌ»ÒÌ·ÏÌ¼ÒÌ·ÑË¸ÎÌ½ÒÎ¾ÒÍºÒÐºÒÌ»ÕÍ·ÎÌ»ÎË¸ÐÍ¹ÐËºÎÊ»ÏÐ¼ÒÎºÑÍ¼ÒÎ·ÒÏ»ÐÒ½ÐÑ¼ÐÌ¹ÑÍºÖÏ»ÑÍ½ÒÎ»ÑÍ¼ÐÏºÕÎ¼ÑÌ»ÐÐ»ÓÌ¾ÓÍ¾ÑÐ½ÓÎ¼ÓÐ¾ÔÒ¾ÕÑ»ÓÎ¿ÑÐÀÕÎ¼ÑÐ»ÒÒ¼ÓÐ½ÒÑ¼ÑÒ¾ÓÐ»ÒÑ¿ÓÎ½ÒÎ¿ÓÎ¼ÒÒ½ÔÐ¾ÐÐÀÓÒÁÑÓ»ÔÏ¿ÓÎ¼ÕÒ½ÔÐÁÓÒ»ÕÒ¾ÓÕ¿ÕÒ½ÕÒ»ÓÐ¾ÖÒ¿ÔÑÁÔÐ¼ÑÎ½ÕÓÀÔÒ¾ÓÔ¾ÒÓ¾ÕÐ¿ÓÒÀÖÒ¿ÕÕ¾ÕÔÀÖÓ¾ÒÔ¾ÓÒ¿ÌÊ·È¼£¹«{{££¡¥¡³¡±§Ê¨³é»ÁðÁÉñÁÉöÁÐúÂÎúÂÒúÄÐùÃÑúÁÎö¿Îö¾Ïö¼Ìó¹Ìñ¸ÊÄÌ¡®ÔðÇËúÃÕô¿Í¢ÍlÜ_ÍÞ«Âß¤ÆÛ¥Èâ¨Çá¨Æá©ÈßªÆÚ¬ÆÜ¤Ãâ¨ÉÞ­Èß«Çß¥ÈÞ¨Éâ­Èä«ÉÞ©ÆÒ¦ÅÌ ¿¾»»¶»µ·´À¶¾··³¶³¹¯¶®µ²µ±¶±»´Á¶ÁµÏ¾Ö¿â§ÈîµË÷ÁÕúÃÙúÊÙúÔãúÙèúÙêúÙîúÛìúÜðúàðúâñøåñÚêÖîêêúèøgõf?ø?ìéìÚïÚîòîúðúgúg?ü?îöîúóúúòúúñúúïúúðúúïúúïúúêúúçúúæúúê÷úãöúàôúáóøÜðÚàÐîÛàúÖêgî`?ó<îÐÔúÎÜÝÊ¾÷"öÍè¯ÊÞ«Â×¥ÁÌ¤½ÿ­¤¡¬§¥¶¯¹¯Á³Ê»Ê¸Ò¼Ù¨¿Ù¬Àà¬Æ×¤ÂÓ ÀÓ¤¾×«ÃÝ©Åà§ÃÙ§ÅÖ¬Èá¯Æá¯ÇÞ¨ÅÒ¡¾Í»Î£¼Õ©¿Ù®»ã«Áç³Ãæ´¿Òoÿ°½Ó¦·¨¦ôVÉO¬!ét³g©¯¬«¥|tlwitd|t_~q`{n`{nb~|gµ§²È¶ÁÍ¶ÌÎ¼ÐÍ»ÌË¹ÌÎ¼ÎÏ¿ÐÊ¼ÍÐ¾ÎÌºÎÎ»ÎÍ»ÌÎºÐÎ¸ÎÎ½ÎÎ¼ÌÎºÐÌ¼ÎÑ½ÎÌºÏÎ½ÌÍ»ÓÐ½ÑÏ¿ÎÎ½ÐÎ¿ÎÐÀÐÍ¾ÓÏºÍÌ»ÏÌ»ÒÎ»ÓË»ÌÐ»ÏÑ½ÒÐ»ÑË»ÐÌ»ÑÐ¸ÏÐ¾ÏÌ¿ÌÎ½ÍÍ¼ÐÌ¼ÎË¹ÏÍ¾ÍÌ½ÒÎ»ÍÊ¾ÎÐ»ÏÎ½ÒÎÁÎÍ½ÌÎ»ÏÎ½ÒÎ¾ÐÎ¼ÎÌ»ÎÐ»ÍÌ¹ÎÍ»ÌÍ¾ÎÊ»ÏÎ»ÏÌ¾ÑÐ»ÐÌ¹ÍË»ÍÉ»ÎÌ»ÌÊ¼ÎÊºÎÊºÎÊ¹ÍÍ»ÎÈ·ÌÇ¸ÊÊ»ÊÊ¸ÊÆºÈÊºÊÉ»ÍÈ»ÈË¶ÌÎºÌÊ»ÈÈ»ÊÈ·ÊÊ³ÉÉ·ÊÈ»ÌÆ·ËÆ·ÉÈºÈÇ¶ÈÈ¹ÌÇ´ËÉ·ÇÉ»ÇÈ³ÊÆ³ÊÇ¸ÈÇ¶ËÅµÉÅ¸ÈÅ·ÊÈµÈÃµÈÄ¸ÍÇ´ÆÆµÊÉ¶ÆÄ¶ÈÆ¶ÅÆ´ÈÉµÊÅ´ÆÃ·ÈÆ¶ÈÇ³ÈÅµÈÅ¶ÈÅ¶ÈÂ¶ÆÃ´ÆÂ¶ÇÄ¶ÆÃ¶ÉÃ´ÆÅ³ÃÁ·ÆÄ³ÈÁ³ÆÅ³ÈÃ´ÆÀ¯ÅÁ²ÃÃ²ÆÂ³ÃÁ³ÄÂ²ÃÁ°ÃÃ³ÆÁ´ÆÁ³ÆÁ³ÅÁ³ÄÁ²Á¾±ÄÂ¯ÃÂ³Å¿³Ä¿´Ã¿±ÄÁ±ÆÁ¯ÆÁ¬Ä¾³ÃÀ´Ã¼°Ã¼¬ÁÀ¯ÂÂ²Á¿¯Â¿°Ä¾³Á¿¯ÁÀ¯À¾²Ã¿®¾¾²Á¿­Â¿­Ã¿³ÁÁ¯Ã¾¯Á¿²À¿±Ã¾®¾¼®À½®ÀÁ±Á¾¬¾»°À½¬À¼¯Á»¬¾»®Á¾¬¾½®Ã¿®¾¼®Áº¬¾½ª¿»ª½·«¾½¬½¾®Á¾¯¾º±¾¹¬¿»¬¾¼«½¾¬¾®¥³´¤»·§»·¥¾¸¨»¸§¾¹¥½»¬»º¥½º©½¸¬»»¦¾¸¦½¸¦¹º¤½»¦»·¥»·§¾¼¨¼¹©À¸©¾»¦»·©º¼¬½»§»¸¨½½¨¾»ª½¹ª¾½§¾»¤¾¼¨Á½«¼»©Á»§¼¸­¿¾¬Ã¾­Ã¹©¼¾©ÂÀ¬¿·¬¾½ªÁ»§Á»©¾»§½·©½½¨Á¹©¾½«½»«¿»¬Á»¬Á½¨½¾¬¿½¬Ã½¬¾¾«Á¾¬Á¼«ÂÁ¬Á¾¨Á»®Á¾­Á½°Á¾«Áº¬ÁÁ¯Á½¨Á»­Á¾­ÁÁ²Ã¾¯Ã¿®Ã½®Ã½®¿Ã«ÃÀ¬ÄÀ¯ÀÂ¯ÃÁ¬ÄÂ°Â¾®ÇÀ®ÆÂ®ÄÀ¬ÁÃ¯ÆÃ­ÅÃ±ÇÂ±ÃÁ®ÄÀ®ÅÃ­ÆÁ®ÅÂ¯ÅÁ®ÄÂ±ÈÀ®ÃÃ­ÈÂ­Æ¿¯ÃÁ±ÇÄ±ÆÀ¯ÄÄ®ÃÃ°ÈÃ®ÆÃ²ÉÃµÄÃ³ÉÂ°ÃÁ±ÊÄ³ÇÁ®ÆÃ°ÊÅ±ÈÄ´ÆÃ±ÈÄ¯ÄÅ²ÇÃ®ÆÃ°ÆÆ³ÇÃ¯ÈÆ°ÇÄ³ÊÅ°ÇÈ³ÆÃ²ÈÆ³ÇÃ±ÈÃ¯ÈÆ°ÊÆ°ÇÄ¶ÆÆµÉÆ²ÊÆ³ÆÇ²ÇÆ³ÊÆ³ÉÇµÈÄ°ÌÆ²ÇÆµÊÈ²ÊÈ³ÈÄµÇÈ´ÈÇ¯ËÆ¶ÊÊ·ËÇ³ÌÆ³ËÈ´ÍÈµÌÊµÉÈ¶ÌÅµÊÆ³ÈÈ¸ÌÌ¶ÎÇ±ÊË¸ÊÊ³ËÈ²ÊÆµÊÉ´ÌÊ³ÎÈ´ÈË³ÏÉ¶ÊÆ³ÌÆ³ÊÊ¸ÐÊµÊÊ·ËÊ³ÌÈ·ËÈ·ÎÊ³ÎÊ·ÌÉ¶ÌÊ·ÌÌ¶ÉÈ·ÌÈ·ÍÈ¸ËÊ´ÎÌ·ÎË·ÌËµÊË¸ÊÌ¶ÌÊ¹ÌÊµÍÌµÎË¹ÎÉ·ÏÌ¸ÍÈ³ÎÌ·ÎÌ¸ÐÊ·ÐÉºÍÌ¶ÐÊ¸ÏÊ¸ÎÊ·ÎÈºÏÍ¼ÏÏ·ÍÊ·ÎË·ÍÌ¸ÎÌ·ÎÌµÎÌ·ÐÊ·ÏÏ¹ÏÎ¸ÒÌ¶ÏÎ·ÒÎºÎÌºÏÍ¹ÑË»ÐÐ¸ÒÎºÌÌ¶ÏÌ¸ÎÍ¹ÏÌ¼ÐÍ»ÏÎ¹ÓÏ»ÐÒ»ÓÐ¸ÓÍ¹ÎÐ»ÑÎ¸ÌÈ´Æ·£º¦rqttzqu||§«¡³¤Ç¡®Ý³»ì¹Áî»Åð¹Èò½Ê÷¿ÊúÂÎô¼Ëö½Êô»Ìð·Èï·ÆïµÆ§ÌøØvó¹Éí¹ÄZßK.í(>å5)í%JÛCÆ¹Ë»Î¹Ó¾Ü¿ÒÀÐ¼ÊºÌ»Ð¿Õ½Ð»È¹É¹Â»¿µ¸´º±·­°¬¬©±¦¬¨§£²¦«~¥§z££x¥u ¬{³£µ¥¸©¿¬µ¬¸«Á®Ì¶Ø½ÜªÁò´ÉúÁÒúÈÙúÏÛúÊßúÎßúÒæúÕäúÖéúÕéúÙìúßïíüÌæÉúâ÷úå÷úìúöýÌöÌúðúúðúúïúúðúúëúúîúúéúúâøúàöúâöúàóúÙñúÙïúÖîúÖêúÒåúÎãúÈàÙùÌÉ¬÷½Óð¹ÎÛ²º¾·¢Æv#í ¡¨Á³»¬½¬º©²«§~¤z¡~ ¡{¢{¢¥¥ª£­¤µ¨·«¾­½¯Ã­Ã±¾±Ç³Ê¶ÍµÓ¡¸Ù§»Ü¡¾Ú£»Ð»Ì·Î´Ã±»­Ã®Ê´Í²ÿpÐ]ÿÈq©¶¹¨½£:Û31Ý-|S¿Më£§¨£|qlk~u`g[qiYwiUrgSt`Uuxdµ£´Ã²¾Ç·ÄÇ³ÈÈ·ÈÆ·ÈÈ¶ÆÈµÊÈµÊÉ·ÊÆ´ÈÉµÈÈµÉÊ·ÊÉ¶ËÈµÈÊ¶ÈÉ¶ÊÇ²ÈÈ¶ÈÉ·ÈÊµÊÃ»ÊÊ¶ÎÇ³ÇÈ¹ÉÊ·ÌÈ³ÌÆµÈÇµÈÆ·ËÇ·ÊÈ·ÌÈ³ÌÆºÈÆ³ÈÆ·ÉÆ·ÊÆ²ÉÉ¶ÈÈºËÈ¸ÊÊ²ÌÇ·ÈÊ·ËÈµÉÈ´ÊÊ·ÊÈ¶ËÊ²ËÆ»ÉÈ¸ÊÊ¹ÍË¸ÈÈ·ÉÊµÌÆºÊÇ¸ÌÈ·ÉÈ·ÊÇ¶ËÇµÉÈ·ÉÈ¹ÊÊ¶ÊÆ´ÉÉ´ÉÅ³ÊÇ·ÊÆ·ÉÆ´ÇÅ³ÈÆµÊÇµÈÈµÈÅ³ÈÆ¶ÈÃ²ÈÆ°ÆÄ°ÉÆ³ÇÇ³ÆÅ³ÆÅ´ÇÃ²ÈÃ³ÈÃ¶ÆÃ±ÆÃ°ÇÇ³ÇÁ²ÆÂ¯ÀÆ¯ÈÃ°ÃÃ²ÈÃ²ÃÆ²ÈÂ²ÇÁ²ÆÃ²ÄÃ³ÄÃ¯ÈÃ²ÇÁ®ÆÄ³ÄÁ³ÆÁ²ÆÃ³ÆÁ¯ÃÁ®ÃÁ³ÁÄ®ÇÁ°Æ¿­Ã¾­Â¾°ÃÃ®Á¿²Ä½¬ÀÁ±ÃÄ¯Å¿²ÂÀ®ÁÀªÃÁ¯ÁÁ¯Ã¾¬Ã¼­ÃÁ®ÁÁ¬¾»«Á¿®¿¾±Ã½¬¿¾°À¿­Á¾­Ã¾¬Ã¾®Á¾ªÀ¿®½½¬Á¾ªÁ»­½¾®¾¾®¾»«À¾ª½¾ªÂ¾­¾¾«À»­¿¾¬À¾¬½¾¬À»«½¼¬»¾«¾»ª¾»¨¾·«À»©¾»ª»»©¾»¬¾¹¬¾º­º¼©¼º«»º¬½»©¾¶«»½¬¼¸§¾º£»»©º»©»»©º»ª»º¨º»«º»¬¼ºª¾»§¼·¦½·©¸¸§¹µ«»º«¹·§»¶§º¹¨º·¦¾¹§¸²¥¸¸¥»·©·¹©¼¹¢·´¤ºµ¦¶¸¤¸µ©º³§º¸¦»³¬¸»ªÁ¼«¿»¨¿¼¬Á¾¬Á¾­Â¾¯Á¼¬Á½­Ã¾¯Á¾®Â½­Á¿®À¾¯Â½±¾¿¯ÁÀ®Ã½¬Á¾®ÂÀ°Ã¾±ÀÀ¯ÂÁ¯Å¼¬Ã¾±ÁÀ®Æ½±Á¾°Ä¿³ÃÃ«ÁÀ®ÅÁ±ÁÂ¯ÃÂ­Æ¿²Æ¾°ÄÄ²ÆÀ³ÃÁ¬Ç¿­ÂÁ­ÅÄ¯ÅÂ±Å»³ÆÃ¬Æ¾³ÄÂ¯Å¿¯ÃÃ¯ÅÀ¯Ç¿¶ÆÀ­Å¾¯ÃÁ¯ÆÂ±ÈÃ³ÄÀ´ÆÄ³ÊÁ¯Ã¿³ÅÅ®ÇÃ³ÆÄ±ÆÁ²ÈÁ²ÉÃµÇÃ³ÈÁ­ÉÃ³ÈÁ³ÇÀ´ÈÀ°ÈÅ´ÊÅ³ÊÃ²ÈÆµÆÅ³ÇÆµÅÄ³ÉÆ´ÊÄ³ÇÅµÊÃ³ÆÆµÈÇ¶ÉÅ³ËÅ³ÇÃ´ÈÅ·ËÂ¶ÌÆ³ÈÈ±ÍÈ´ÇÊ³ÉÈ·ÉÄ´ÈÈ¶ÌÊºÊÅ´ÉÆ·ËÇ·ÌÆ³ÊÈ·ËÅ¶ÈÆ³ÌÈµÊÆ·ÌÊ¶ÌÍµËÇ³ÌÈ·ÐÇ´ÍÊºÌÉ¶ÊÈµÎÈ·ÊÊ¶ÍË´ÌÉµÌË¹ÌÊ¶ÍÊ¸ÌÈ·ÐÊ¸ÌÇ·ÌÇ½ÎË¸ÌÈ·ÌÊ¹ÌÌ¸ÐÇ·ÎÌ·ÏÌ·ÌÊ»ÌÉ·ÎÊ¸ÎÌ¶ÍÌ»ÍÊ¹ÎÉ¶ÍÆ¶ÎÊ·ÏÌµÎÌ¸ÌË¹ÒË·ÎÈ·ÎÊ¹ÌÌ¸ÏË»ÐÌ»ÐÌ·ÒÎ¹ÎÊ¼ÒÌ·ÐÎºÐÌ»ÑË¹ÑÎ»ÐÉ¾ÐÐºÐÎ¹ÑÎ»ÑÌ»ÒÊ·ÐÌ¼ÑÊ¼ÒÌ¸ÐÎ»ÒÏ·ÑËºÑÌ»ÑÎ»ÑÌ»ÓÐ¹ÒÐ»ÒÑ¼ÓÌ¼ÏÎ½ÕË¼ÒÎ½ÏÎ¼ÓÍ»ÓÎºÓÎ»ÓÐ¿ÔÎ¾ÐÌ»ÒÐ»ÖÌºÖÎ»ÐÍ¾ÕÏ»ÔÏ»ÐÎ¼ÒÐºÔÎ½ÐÐ½ÓÍ¹ÑÌ»ÐÐ¼ÐÑ»ÓÎ¿ÒÐ¿ÓÎ¾ÔÐ¼ÒÌ¹ÏÍ»ÑÓ¿ÒÒ¾ÔÍ½ÒÐ»ÒÐÁÕÑ½ÒÐ¾ÓÐ½×Ó¿ÒÓÁÕÒ¼ÕÓ½ÕÒ½ÖÒÁÕÓÁÖÑ»ÖÒ¿ÓÓÁÕÓ¾ÕÏÀÓÒÁÕÒ½ÖÑ¿ÒÐÁÕÕ¿ÕÓÂÙÒÂÓÔ¿ÖÓ¿ÖÕÁÖÓ¿ÓÓ½ÐÐ¼ÉÁ¦Á¦­¡{~z| ¦¥®¤¯¦½¨Íª³ä¸ÀðÁÊó½Êö¿Î÷ÃÏùÄÐúÆÑùÂÒøÀÎöÂÏô»ÎîºÊºÉDì8özÝfò¶ËÍÀ­$ò Ín¼°¤zÆo ð³¨£Ð¾Í¾Ð¢ÀÍ¿ÎÁÈ¼Ì¼Ì¾É¾ÂºÃ»Æ¹Æ½ÁµÁ·¾¶´³¶°¬­ª¬¨¨¨ª¥©¬©¦¦¨£­|£¢ ~¤z¤©¡±¤»«»ªµ©»­Å°Ê·Î»ÙªÀð»ÌúÅÕúÈÛúËÝúÍáúÍãúÏâúÕçúÖëúÛëîÿÈêÅúä÷úä÷úëúõÿÈøÈú÷úú÷úúõúúöúúóúúñúúíúúéúúçøúåöúäôúãóúÜðúÝðúÖðúØêúÕçúÏâÛ~ÿ¼Æ¦ä±ÌÍ¸´Î¯°Ò¿Ìº¯¥(è%x¹n´®¶«³¨ª¤¦~¤¡¢|¡ ~ ¢£~ ¡¢©£¯§¬§³ª¶©³¬·¬¼´¿³Ê³Ò»Ð¥»Ò¦¼ÚªÁÜ©½Ò¢¼È»Î·Ê±Å´Á°Ã®ÿ¹ÿø÷÷RÜD¼¤¤µ¡2ß/ñê ª¨«©­§xuq~itd{rbw`wl[|o_t¿°¹É¸ÃÊ¶ÉÊ»ÊÈ¹ÊÊ»ÊÍ¹ÍÊ½ÎÊ¹ÎÍ¹ÌÐ»ÍÌ¹ÌÌ¼ËÊ»ÏÊºÒÊ¹ÏÎ»ÊÌ½ÌÊ»ÊÌ»ÎÍ¹ÎÎºÊÉ»ÍÍ»ÐÍ·ÍÊ»ÏÍ»ÏÊºÎË»ÎÌ¸ÎÊ¼ÎÍ¸ÍÎ»ÐÎ·ÌË¾ÊÐºÎËºÐË¼ÎÍµÍÈºÌÌºÎÌºÌÐºÎÐÁÎÊ»ÌÌ¼ÎÎºÐË»ÏÎ»ÐÎ½ÍÍ»ÒÎ¾ÑÌ»ÐÐ¼ÐÎ¼ÎÍ¾ÎÎ·ÍÎ»ÎÎ¼ÎË»ÑÌ·ÎÌ»ÌÎ»ÏÍ¼ÎÊ¹ÎË»ÏÌ»ÎÍ¼ÍÍ»ÐÊ»ÍÌ»ÐË»ËÎ¼ÌÊ»ÎÌ»ÌÊºÎÈ»ËÆºËÈµÌÊ¶ÌÉ·ÌÈºÌÌºÌÈ·ËË»ÌÈ·ÌÊ·ÌÈ·ÊÆ¶ÌÊ¶ÊÉ¸ÈË¹ÈÈµËÇ·ÊÊ·ÍÉ·ÊÊ¹ÊÄ¶ËÉ·ÍÉ»ËÉ»ÇÈµÌÆ¸ÊÇµÇÇ·ÉÇ¸ÊÈ·ÈÉ¸ÌÃµÇÆ´ÆÆµÈÈ·ÈÅµÅÅ´ÈÆ¶ÈÆ¸ÊÆµÈÃµÆÃ±ÆÄ³ÄÂ±ÆÂµÅÆ¸ÅÃ³ÊÇ³ÇÇ°ÅÅ³ÆÃ¶ÈÅ´ÆÆ²ÁÃ´ÈÅ³ÇÂ²ÃÅ²ÆÂ´ÇÃ°ÃÂ±Ç½²ÃÅµÆÆ³ÈÁ²ÅÁ³ÈÁ°ÃÁ³ÅÁ³ÃÂ²ÇÆ´ÇÂ¯ÆÂ±ÆÂ±ÆÀ³ÂÁ´Ä¿°ÅÁ²ÂÃ¯Æ¾¯ÁÁ±ÃÂ²ÃÁ°Ã»¯ÁÁ²Á¾¯ÃÀ°ÃÁ¯Ã¾¯Â»³¾Á¯ÃÂ¬ÁÀ±Ã¿®ÃÁ®Â¿±Á¾®Á¾®ÂÁ±Â¾¯ÁÁ¬Ã¾¯¿Á±¿¾¯Â¿­À¾¯ÀÀª¾»¯Ã¼¯Á»¬Á¾­À½®Á¼®¾½­¿¼®Á¼­Ã¾®Á¼®¼¾­À½¬¼¼¬¾º¬¾¹¬¾»¬¾¼¯»¹¬¼¼¬Áº¬½¼¬¾®¢³·¥¸·¥»»¦¼»©º¹¦¾¸£¼·¨¼º¤¾¶¤¼¸¥¼»«¿·¥½º§º¸©¾¹«»¼§¾¹§¼¼¦½¹§¾¾§¼»©Á·¨¾¸¦¼»¬¾¹§¼¹©¾·§Áº§¼º¨Àº©Á»«¿º¨Á¹¬¾º©Á¾ª¾»©¿½¦»º¨½º«¿½©À»¨À¹©¾½ª¾½¬¾ºªÁ¿¬Á¾©¼¹«¾½©¾½©Á»­¼¼ªÁ»«Á½©¾¼ªÁ»©¾¾«Á½®Á¾«Á»ªÄ»«Á½«ÃÁ«Á½«Â¾¬Ã½©À¿®Â¿ªÄ½«Á½©¿¿«Ä¾¬Ã¾®Â¾¬Â¾­Ã¿¯Ä¾¬Ã¾©ÄÀ±ÄÁ¬Ä¾«ÃÂ¯ÃÁ°ÇÁ©Ã¼­ÃÀ°ÅÂ¯ÆÄ¯Ã¾¯ÅÃ¬ÄÁ­ÄÁ°Æ¾«ÃÁ°ÃÆ³Ä¿±ÈÁ­Æ¾³ÆÁ±ÈÁ­ÅÁ³ÄÁ³ÅÃ°ÆÁ¯ÈÄ±ÆÄ¬ÅÃ¯ÊÃ²ÄÃ±ÈÁ³ÇÄ¯ÄÅ²ÇÁ¯ÊÂ°ÆÃ°ÇÂ²ÉÄ®ÆÄ´ÉÃ±ÈÆ³ÇÂ°ÆÃ®ÊÄ²ÆÄ²ÈÃ±ÆÂ®ÈÈµÊÂ°ÈÄ´ÈÅ°ÈÇ±ÉÅ³ÈÇ³ÆÈ²ÊÆ²ÉÅ³ÇÂ²ÊÄ®ÆÇ³ÊÇ°ÊÆ´ÉÆ²ÌÇ²ÊÆ´ÊÅ²ÊÅ³ÈÆ²ÊÇ³ÊÈ´ÊÈ²ÆÆµÈÅ³ÌÉµÌÇ´ÌÈ´ÌÈµÊÆ²ÌË²ÊÊ³ÊÈ³ÍÉ·ÊÈ´ÈÇµÉÇµÌË°ÊÆµÌÊ³ËÈ´ÌÊ±ËÈ·ÍÈµÌÊµÊÈ·ÌÈ³ÌË¶ËÉ·ÊÌ·ÏÈ·ÎÉ·ÌÆ·ÎÈ´ÊÇ¸ËÊ·ËÉ²ÌÊµÎÊ·ÍÌ¶ÍÊµÌÌ´ÏÊ³ÌÌ¸ÍÎ·ÏÊ´ÌÊ¸ÐÊ·ÌÌ·ÐÊ·ÎÊµÐÌµÌÊ³ÐÌ·ÍÈ³ÐÎµÌÉ·ÐÊ´ÎÊµÎÈ¹ÍÉ¹ÎÈµÏÍ·ÐÊ¸ÌÌµÎÊµÎÊºÏÊ·ÎË¸ÐÊ¸ÎÎ¸ÎÌ·ÏÊ»ÒÌºÏÍ·ÏÌ»ÐÎ·ÓÎ¸ÓÎ»ÎÎºÒÎ»ÏÎºÌÍ¸ÎÎ»ÎÍ¹ÒÎ»ÐÊ¹ÌÍ»ÑÎ¼ÑÐ¸ÑÎ¹ÐÍ½ÐÌ¹ÌÇ·È¼¥¼¥­zwtt{xq~£©± ·§È¡°á±»í·¿ð»ÆðºÊòºÉö¾Èö¾Ì÷½Ëõ»Ëò»ÈñµÈê°Çßº¼Û½¶&óvÖdç«ÆÞ ÂoÏaöúõfÌ[Ï»ÌºÄ»Ãº½·À·Æ¹Å¸Ã¸Á¹Á¶¾¶ÆºÄ¹Â´¾³¶¯««¬«¬{§­~§§t¤x¡zrluroink¡r§w­z¬u¡­x£·¥¾¬¾¬È²Ù ½æ±Ãï¶Ìö¹Íú¾Ôú¾×ú¾ÖúÁÚÿèvÿéÇå¾ÝåÕöãññÿôÇóÇÝôÝøõøúòúúòúúíúúéúúèùúã÷úßôúÛîúÙîúÙìúÖìúÑèúÏçúËàÿßnÿÆª±µ£¥¥¨>Ù:«x_¼Uè§w¡ tttntruuqroq{q£z«{®|¢±{¥«¥´¦·§½®Ä°Ç²ÉµÊ²É´Á¯»«µ«¶¦·¥¸§¸©ÿ¨¤²¶³²¦Áª¹¡¨¢w¢¦©«¦¦~|w{d{ilYznQulYnl[wnUtfS{~gº¬·Ã³¾Å²ÃÃ®ÄÆ°ÆÅ°ÈÆ³ÆÈ¶ÇÊ³ÆÆ³ÇÆ³ÉÆ³ÊÈ³ÇÆ³ÆÇ±ÇÇ²ÄÆµÆÈ¶ÇÄ²ÇÅ²ÆÈ³ÊÆ²ÇÆ³ÄÃ°ÇÈ±ÆÆµÆÆµÆÇ³ÈÃ³ÄÅ´ÇÃ´ÆÉ³ÉÈ´ÊÊ²ÊÊ·ÈÆ¶ÈÊ³ÉÇµÈÆ´ÊÆ´ÈÇ·ÈÈ·ÈÇµËÆµÈÇ´ÌÇµÊÈ³ÌÇµËÉ¶ÊË·ÌÈµËÈµÈË¶ÎÆ·ÊÆ¶ÊËµÊÊµÈÆ¸ÉÊ¶ÌÆµÈÆµÊÌµËÈ·ËÈ·ÊÆ´ÈÈµÈÈµÈÈ¶ÉÅ´ÌÊµÊÆ·ÈÅ²ËÇ´ÇÄ²ÇÈ´ÉÆµÈÄ³ÈÅ²ÉÆ³ÈÅ³ÆÇ³ÇÅ³ÆÃ²ÆÇ²ÇÃ´ÇÃµÉÅ°ÆÃ²ÅÄ³ÆÄ³ÆÃ±ÅÆ³ÇÈ´ÆÄ°ÇÂ²ÆÂ³ÆÃ°ÈÂ¶ÄÃ²ÈÁ®ÇÂ²ÃÃ°ÈÁ®ÃÁ¯ÃÄ²ÇÃ°ÅÁ®Å¿±ÅÁ±ÆÁ°ÃÀ±ÃÂ²ÂÄ¯ÄÀ¯Ã¾±ÆÂ¬ÃÁ°ÄÃ°Ä¿¬Ä¿¬ÆÁ­ÃÁ­Á½±¿Á¬ÁÀ­Â¾¬ÃÀ±Ã¾¬ÃÀ­Á¾¯Â½«Á¿®ÁÁ®Á¾¯ÃÁ¬Á¾¬À¾©À¾©Á¾­Á¼¬Á¾¬¾¾ªÁ¾«Á¾«¾½°¿¾¬ÂÀ¬¾½¬À¾«¿¾©¾½«¾½«½»«À½«¾»«»¼¬¾»ª¾»«Á»ª¾¹«¾º¬Á»«Á¹«»ºª»¹©Á»§¾¹¨¾¾¬½ºªÀ·¬»¼§½¸©»»ª½º§¿»«½·¥ºº«¾»§½¹§½¸¬½¸ª½·¬¾·©¹·¦º·«½¹¨º¸¨¼»§»¸¨»¸¥»·¦»´¨¹·¦»µ¤¼´§º¶¥··©º³§º¶¤º¶¦·³¦»¸§º·¦ºµ¤¸·©¸µ«»½°¾¾¬Á¾®Â¾¬½¿®Â¼¬¾¿¬¿½¬Á¼ª¾¾­Ã»¯À¿©¾¾¯ÁÁ¬Å½®Â¾¬ÁÀ¬¾À®Ã»¬¿Á®ÅÂ¬ÄÁ­Á¿¬ÃÁ¬ÃÁ®ÂÀ°À¾³ÃÁ¬Á¿°ÂÁ¬Á¿®À¿®ÁÁ±Á¿®Â¿±Ã¾®ÃÁ­Ã¾¯Á¼¬Ä¾¯Á¾³ÂÁ±Ã¾¯ÃÁ¯ÆÁ¯ÈÁ²ÅÁ®ÃÂ³ÆÁ¬ÃÁ­ÁÁ®ÃÁ®ÇÁ°ÆÂ³ÇÁ²ÇÃ¯ÅÄ°ÅÄ´ÈÃ³ÅÁ³ÅÂ´ÃÂ²ÈÂ±ÅÄ±ÆÃ±ÈÁ³ÆÅ±ÅÅ²ÆÃ±È¿²ÈÃ³ÉÅ³ÇÇ³ÈÅ´ÈÅ¯ÈÅ´ÆÃµÌÅ´ÆÅ¶ÊÃ³ÊÆ³ÈÇ·ÉÆ¶ÆÆ³ÊÆ¶ÉÅ·ÊÃ³ÉÆµÈÈ±ÌÈ³ËÆ²ÈÄ·ÉÅ³ÊÈ·ÉÆ¶ÊÅ³ÌÆ´ÌÈ·ÈÇ·ÊÆ·ÊÈ³ÊÄºÎÈ³ÉÆ³ËÈºÍÈ´ÌÇµÌÉ¹ÎÈ´ÊÈµÊÈ·ÊÈ´ÌÆ´ÌÈ¸ÍÇ·ÌÈ¹ÍÉµÊÉ·ÎÆµÌÉµÎÇ·ÍËµÍÅ·ËÌ·ÎÉ·ÌÈ¸ËÊ¹ÌÇ¶ÎÊºÎÊ¹ÏÊ»ÍÊ¹ÏËµÐÐºÐÈ¶ÎË¸ÉÌ·ÎË¶ÎÊ¹ÎÉ·ÎÈ·ÍÉ·ÎÊ·ÎÇµÎÌ¸ÎÍ·ÌÊ¶ÏÌºÐÌ¹ÎÌ´ÐË·ÊË¹ÑÌ»ÎÌ»ÏË»ÑÊ»ÐÊ¹ÒÌºÍÌ¹ÏÌ·ÏÎ¼ÐÌ¹ÒË½ÎÈ»ÐÏ»ÒÊ·ÐÌ¹ÏÈ¹ÑÍ·ÎÎ»ÒÊ¼ÑÍ¹ÒÎ½ÐÎ½ÐÌ»ÐÎ»ÒÒºÒÌ½ÒÌ¿ÑÐ¹ÑÎ¸ÐÍ½ÓÒ½ÓÐ¶ÐÎ½ÐÒ¿ÑÍºÐÏ»ÑÑºÒÍ»ÐÏ»ÒÐ»ÒÒ¿ÔÎ¿ÓÓ¾ÓÎ»ÒÎ¹ÑÐ½ÒÌ»ÒÎ½ÕÎ½ÐÐ»ÑÐºÒÍ¼ÒÐ»ÓÑ¸ÖÌ»ÒÎ½ÕÎ¿×Ð¿ÕÐ¼ÐÒ½ÓÎ¼ÒÐ½ÔÑ¼ÓÐ¿ÓÐ¼ÓÒ¼ÔÐ¿ÒÐ½ÖÒ¿ÕÓ¼ÕÒÀÖÓ½ÓÒÁ×ÐÀÕÒÀÖÐÀØÒ¾ÓÑ¿ÖÑÀÕÐ¿ÐÓ¾ÕÓ¾ÓÑ¿ÓÔÁÕÓ¿×ÐÀÕÒÁÓÒ¿ÓÒ¼ÐÈ³È¬´¦¤||{ ¥ª¢®¤³¬»­Í¨¶ç¶Ãò¾ÈôÁÉõÁÎù¿ÒúÂÎøÃÐúÃÐúÃÒö»ÌñºÈñ½Êõ¼ÌåÂÂ&ô yÚfè°ÇÕª¾IÞD%ì"4ç/(î#MáAÛ­»å©ÃÞ¦ÁØ¡ÃÙ¤ÆÞÃÜ¢ÁÖ¢ÁÙ¢ÂÖ¢ÃÕÁÑ ÀÊÀÐ¾Ê ½Î»Ì·Æ¹Æ¶Â¶À¯¾²¼¯°«¨{¥¢z¡{z{¡uwr¢u¯x£­x¨|¡«¤µ§³©»¬Â³Õ ¶è§Àé¬Æñ·Êö¼Ìú¼Ó÷»Óÿ·Õÿüüü`ö_¬ïªýþþþ`ý`ìúìúùúúõúúðúúìúúêúúèúúá÷úÜõúÞðúÙïúÚíúÕêúÌäÿ·Ïÿø÷öNÕF´¥jºdéééz wwzxwuwrqrtrouq{ |¢§£¨¤®ª±ª·ª¼®¼´ÅµÃ³½³¿°¸­µ¬´¬·­·¥ºª¼ª¹¬¿¬Ä­Ç¯Ê©Â¨¿¨³ ¬ª¥¬¯ª¨¯ª|ilobq[{uf{rbwdzn`r¢¥Á°¸Æ·ÃÌ·ÆÊ´ÈÊ¹ÊÈ¹ËÈ´ÌÊ·ÌÉ¶ÈÈ·ÈË¸ÉË·ÌÆ¶ÈÈµÌÊ´ÍÊ¶ÇÆ»ÉÇ¶ÉÉ¶ÈÆ¶ÊÈ¸ÊÆ´ÈÊ·ÊÊ¹ÌË·ÊÉ¹ÈÊ¹ËÌ¹ÊÇ¹ÈÈ¸ÈÊ¹ÌÉ»ËÌºÍÎºÐÌ¼ÎÊ»ÏÊ¹ÍÍ·ÍÌºÏÍºÐÊ»ÎÌ¹ÍÌ¹ÌË¹ÍÊºÏÏ»ÎÍ»ÎÊ»ÐÑºÍÌ¹ÍÌ½ÐÌ»ÎÐ»ÐË¾ÏÍ½ÐÍºÒÌ¸ËÌ¹ÎÏ»ÎÍ¼ÐÊ»ÍÎºÐÌ¾ÑÎ½ÐÊ¹ÏÌ¼ÎÌ»ÍÌºÍÌ·ÎÊ»ÍË¸ÍË¶ÌÈ¹ÐÈ·ÍË»ÐÊ½ÌÌ·ËÉµÌÈ»ËÊ¹ËÊ¶ÌË¸ËÊºÊÈ¶ËÉ¶ÌÆ»ÊÍ·ÐË·ÊÃ·ËÇ¹ÉÊ·ÇÆ¸ËË¹ÍÈ·ÊÆ·ÈÉ¹ÊÆ¸ÌÉ³ÈÈ¶ÎÇ¸ÌÇ¶ÉÉ·ÈÈ¶ÈÅ·ÉÆ³ÊÆ´ÈÆ¹ÇÊ·ÈÉ¶ÊÆ³ÆÇ·ÉÇ·ÈÈ³ÇÇµÇÅµÇÃµÈÁ¶ÈÆ·ÇÄ³ÈÅ³ÊÃ´ÇÄ³ÃÅµÉÁµÆÃ²ÆÃ³ÇÆµÆÈ´ÆÁ¶ÆÄ³ÉÂ´ÆÃµÊÂ³ÅÁ³ÆÅ±ÄÄ³ÆÅ³ÆÄ²ÅÁµÃÃ²ÃÂ¯ÆÃ²ÃÁ³ÆÃ®Â¿³ÃÀ¯ÃÀ¯ÃÁ°ÃÂ³ÅÀ®ÁÁµÄ¾®ÃÁ°Â¿²ÄÂ¯ÃÀ¯ÄÀ¯ÁÀ®Ã¿®ÈÁ±Á¼¯Å¾¬ÃÁ²ÂÁ°ÃÀ¬Ã¾°Ä¾¯ÁÁ±Ä¾°Á¾¯¾¿³Á½³Ã¾­Á¼­Â¿®Â¾²ÂÁ®ÂÀ®À¼®Â¿°Â¾¯Â»®¿¼±Á¿¬Á¾¬¿»®¿¾¬À½­Á»°À¼­¾»¬¿»®¾»¯¿º­¾¹¬¾¼¬Â¹¬À¹ªÀ»¬Á½©¿»¬Â½¬¿º«À¹¨»¹®¾°¡µ¶¤¹¶§¸»§½º§¾·ª¼»§¾·¦¼¹£»¸§½»¥½¸«»»§¿¹¥¼¸ª»»©½·©»»¨Àº©¿»ª¾»ª½½§½·«À»ª¾»§¾»§¼»§¹½§Áº©¿»§½»ª½º§¾¹¦¿»§½¹¬Áºª¾¸©¾¾¨¿½©¿·«¾¼§À»¨Á»¦À½§»º©¾½ª¿»ª¿»¬Ã½©¾¼¬Áº©¿¾¬½¼¬Á¾©Á¾«¾¾«¿½§Á¾¨¾¾¬ÂÀ«Á½©Ã½«¿¾¬Á¾¬Á½¯Â½¬Ä¼«Á¿¬¾½¯Ä½§Â¼¬Â½ªÀÁ­Ã¾®ÃÃ®ÁÃ®Å¾°ÁÃ°Ã¿®ÀÂ«ÄÁ±Ä¿­ÄÁ¬ÁÁ¯ÄÂ°Æ¾¨Ã¿­ÁÁ°Å¾®ÆÁ­ÅÃ¬ÄÂ®ÆÁ¯ÅÁ¯ÆÁ¯ÄÁ¯ÄÁ±ÊÃ°ÄÁ±ÃÁ°ÄÃ®ÆÀ°ÇÂ°ÈÁ®ÈÅ³ÈÃ±ÆÂ°ÇÃ°ÈÄ²ÈÅ²ÊÄ¬ÇÁ®ÅÅ²ÇÁ®ÇÃ±ÆÆ³ÇÃ±ÈÃ±ÈÅ°ÈÄ°ÉÅ±ÇÄ±ÆÄ­ÇÃ³ÈÄ²ÈÆ®ÊÂ³ÈÆ³ÈÈ°ÈÄ²ÄÆ´ÉÄ°ËÈ´ÈÃ²ÇÄ±ÊÅ´ÈÆ³ÊÇµËÆ²ÇÂ´ÉÆ°ÊÃ±ÉÅµÉÆ±ÈÆ³ÊÇ°ÇÄµÊÆµÊÉ²ÌÄµÊÇµÌÆ¶ÊÉµÊÈ¶ÊÆ±ËÈ·ÌÉ³ÌÈ³ÉÆ´ÊÊµÌÇ±ËÆ·ÊÆµËÊ·ÊÈ¶ËÈ²ÌÇ²ÊÆ´ÊÉ³ÌÈ´ÍÈ´ÍÌ·ÊÇ³ÎÇ¹ÌËµÊÊµÍÉ³ÊÈ·ÏÊ¹ÊÌ³ÏÎ´ÌÉ·ÍÈ¶ËÊ·ÌÈ³ÌÊ¹ÍÊ¸ÎÊ¸ÌÊµÉÈ´ÌÇ³ÍË²ÍÊ¹ÌÊ·ÎÌ¸ÐÊ·ÍËºÏË¸ÌÊ·ÎÈ¹ÐÌºÎÉ¸ÐÈ¸ÍËºÏÊµÒËµÌÊ»ÐËµÎÊ¸ÌË¶ÐÊ·ÎÎ»ÒË¸ÐÊ»ÎÊ¸ÎÍ¸ÌË·ÎË¶ÌÉ¹ÐÌ¹ÑÍ»ÐÍ¸ÏÊ¸ÎÌ»ÎÌ¼ÎÎ¸ÐË¸ÎÎ»ÒÎ»ÏÌ¸ÑÌºÐÎ»ÑÌ¹ÎÍ»ÎÎ»ÑÎºÐÎ»ÑÒ¼ÒÎ»ÒÌ»ÐÎ¸ÏË·ÌÃ¬À«²~ unnttuxx¢§©£µ©Î£²ã³¼í¹ÄñºÇñ»Èö¼Ë÷¿Ìö½ÊöÁÌó½ÌñºÇî¶Èë²Æî´Èâº¾&ó zÕeé°ÅÍn,ê'¯¥¥Í¸½®¥/î(Òné°Åê²Èé¯Èæ¬Çã°Çè²Êç±Èè³Èé¯Éâ¬Åà«ÂàªÄæ«Ãã°Àà§Ãß¦¼á§¾Û£¾Û ¼»ªÀreÅ[l¾_y±n¦±yv¡jNÀGnf`¢_P³LX±Sm¤d|°w[¾O²Ä¬Ì°Ö²à»ß£¾ç¨½ì®Çï¯Ìø·ÏÿÚÎ¾ÁÛ­Áß²Áâ¹ÚßÐòÝêÚç×ÁðÁÁòÁÁöÁÚöÚø÷øúõúúôúúíúúêúúçúúå÷úÛóúÕïúÒèúÒçúÌäúËßúÃÚú·ÔÿÊ·¬¬¸¡¯¨§²¯xunxqgnlnotqnligklkkgqqtr¤°¡´©º©¾¬»«º¬µ«²©¬¨­§²¤«¢© «¡°¡´ ³¥¹¤º¤»¦»¥¾¥¸£¬§£ ¦¦¥¥£r|br[znYwgUwkWtn_tkWzn[zt§¤¿ªµÁ²¿Å±ÄÃ²ÃÃ´ÃÃ«ÃÃ®ÁÅ°ÅÄ²ÆÁ®ÁÂ®ÄÅ¯ÄÆ°ÂÄ±ÃÃ¯ÄÃ°Å¿°ÃÃ­ÅÁ¯ÃÂ¬ÄÃ²ÆÄ³ÆÃ°ÆÀ°ÃÄ³ÆÁ±ÅÆ²ÃÆ®ÇÄ²ÈÃµÄÅ°ÈÂ´ÆÈ´ÈÇ³ÈÇ³ÊÆ´ÇÉ·ÊÄ³ÄÈµÉÈ¶ÇÊ³ÆÇ³ÇÃ¶ÉÆ³ÆÈ¶ÌÆ´ÊÊµÌÊ³ÈÆ¸ÇÆ³ÊÇ³ÌÇ¹ÌÉ´ÌÇ¶ÊÆ¶ÌÈ·ËÌ´ÊÈ´ËÉ¶ËÈ´ËÆ´ÊÉ´ËÈ´ÉÈµÈÊ·ÊÇ¶ÉÈµÉÇ²ËÉ²ËÇ³ÈÄ³ÆÈ´ÈÆ°ÈÄ³ÌÃ´ÆÃ³ÃÆµÆÃ¯ÇÄ³ÄÂ³ÇÄ³ÈÅ²ÇÅµÈÆ´ÅÃ²ÈÂ³ÄÃ³ÆÅ²ÆÃ¶ÈÃ²ÇÆ³ÆÃ²ÇÅ´ÈÄ²ÇÂ°ÆÂ¯ÄÃ´ÈÃµÄÁ°ÈÄ°ÄÂ±ÄÁ¬ÃÂ°ÈÃ±ÄÃ®ÄÃ³ÆÁ±ÇÁ¯ÅÃ°ÆÃ±ÇÄ²Ã¿®ÄÀ¯ÂÁ­ÀÁ²ÄÃ±ÃÃ±Ä¾®ÄÂ¯ÃÀ°ÄÀ­ÁÁ°Ã¾°Á¿°ÁÀ«ÄÀ«Ä¼¬ÀÀ®Á¾­Ã¾°Á¿­Ã»«Á½³Á½«Á¾¬Á¾®Â¿²Á¾¬Ã»­À»®¾¾©Ã»¯¾½«¿¼¬Á»«Â»¬¿¾¬Ã¾«½¹¬¿¼«Á¼¬Á¼«½½«¿»¬À½­Â¹©¿¾©¾¹¬¾¼«¾¾«¾»¬½»¬¼¸§¾½«¾»©¾»¬¾º§¾ºª¾»¥»»¨¿¾«¾¸§¾·¨»·©»·§¾·¦¾»©»¹©¾µ§»¸©»¸©»¶¨¾¸¦»¹©½¸¤»¶¨»·ª»·¤»¸§¼¸ª»¸¦º¸¥»µ§¸µ£»´¨··©¸¹¦»µ¢·³¤¸³©·¹¥¸µ¤·¶¢¸·¢»µ©¸µ§¼»¬Á¼®À¿­Á»¬¿¾¬Á¿¯Á¼ªÁ¾¬Ã¿¯Ã¿¬Â¾ªÀ¾¬ÁÂ«Á¿­ÂÁ­Â»­ÀÁ¯ÀÃ­ÃÁ¬Ã¿®Ã¿¬¿¿¯ÄÀ®ÁÁ¯Á¿®Â¿®ÁÀ®ÁÁ­Á¾¯ÄÂ¯ÃÁ±ÅÀ­À¾®ÄÁ®Ã¼¬ÅÀ®ÃÃ­ÅÀ­Ã¾¯ÃÀ­ÈÂ­ÃÁ³ÅÁ­ÂÁ­ÆÁ¯ÃÃ­ÂÁ­ÇÃ²ÁÂ®ÉÃ¬ÅÂ¯ÅÄ²ÆÃ°ÆÄ¯ÃÁ±ÅÃ¯ÇÇ³È¾³ÊÅ°ÆÂ¯ÆÄ³ÈÃ³ÆÂ²ÇÃ³ÃÅ²ÇÆ°ÈÁ³ÆÃ²ÇÃ­ÄÃ³ÆÅ°ÅÆ³ÈÄ°ÃÈ·ËÆ°ÌÃ´ÇÆµÉÇ¶ÊÇ´ÈÈ³ËÆ·ÉÅ³ÉÃ°ÆÄµÊÇ±ÉÅµÈÆ´ËÄ·ÇÆ´ÊÈ´ÌÄ´ÉÇµÉÇ²ÊÇ´ÊÉµÌÈ¸ÌÈ³ÌÇµÊÊµÈÈ·ËÆ´ÍÈ·ÊÉ³ÎÈ¶ÌÉ¶ÈÉ·ÌÇ³ÌÈ¸ÊÉ·ÐÈ¹ËÈ´ÉËµÌÊ·ËË¶ÌÉ·ÎÇµÈÈµÌÌ¹ÎÊ·ÎÆ¸ÌÈ»ÌË³ÒÉ·ÆÈ¹ÎÌ³ÐÊ¹ÎÌºÎÊ·ÎÊ¶ÍË¹ÎÎ¹ÎÉ»ÎÉ¹ÌÌ»ÍÉ¸ÐÈºÌË¶ÐÎ·ÑË¹ÎÊ·ÐËµÎË¼ËÊ¶ÎÊ¶ÐÎºÎÉ¹ÎÌ·ÐÎ¹ÍÍ»ÐÏ¹ÐÌ»ÏÌ¹ÐÐºÑÎ»ÐÎ·ÌÍ¸ÒË·ÐÎºÎÑ»ÒË·ÐÌ»ÓË¸ÑÍ»ÎÊ¹ÏÐ¼ÒÎ¸ÑË·ÐÌºÐÎ·ÒÌ»ÓÍ¹ÒÎ»ÐÍ¼ÐÌ·ÒÎ¼ÕÑ»ÐÑ¾ÓÐºÒÎ»ÐÐ»ÓÎ¹ÑÌ¼ÏÎ¾ÓÎ»ÒÎ¾ÒÎ¹ÒÌ»ÓÐ»ÑÎ¸ÒÐ»ÑÍ»ÓÑ»ÑÑ½ÒÎ»ÓÎ½ÒÑ¾ÓÐ¼ÒÐ¾ÕÐ»ÐÎ»ÕË»ÐÐ¿ÒÏ»ÓÐ¼ÒÑ»ÓÔ½ÖÐ½ÒÒ½ÐÒÁÖÏ»ÕÒÀÓÒ½ÔÔÀÕÒÁÒÓ¾ÓÑ»ÑÒ¼ÒÒ¾ÓÓ¾ÖÐ¿ÓÓ»ÕÒ½ØÒ¿ÓÓ½ÓÒ»×Ò½ÖÐ¾ÔÓÀÖÒÀÖÐÁÕÕ¿ÕÒ¾ÓÒ¾ÒÒÁÖÒ¼ÕÒ¾ÔÔÂÔÐ¾ØÓ¾ÕÒ¿ÒÒ»ÒÍ·È°¸¤zxz{£¨§¬ ¬¥º°Û¬»ì»Ãó¿Ëõ¿ÌöÁÎúÂÓúÃÒùÃÐúÃÕúÁÐò¼Ìï¹Íÿç´ÇÞºÁ&ó {ÝfõÁÎ°Ì*ñ#Æ¹¶¤É'ò#¯Í÷ÀÓùÆ×úÂÕúÁØúÅÖöÁÔöÃÕ÷ÃÓøÄÒ÷ÂÓòÁÑ÷ÄÒøÆÕ÷ÄÏôÁÒò¼Êð¼Êí¸Êð¹Ì°ÆIå@#ñõ+é'À°JÓA'æ$3Ü.#å!/Û)6Ô3éñ%â"¯i¹]î*æ% í¢©Ï³Ò³Ü¼á¾æ¥Àê©Åì¬Èö·Ðú¿ÓúÇßúÐãúÛêúÙñúÜñúßòúæøúíúúïúúñúúøúúúúúúúúôúúòúúïúúëúúæøúâõúØðúÒìúÕèúÎçúÌÝú¾ÖöµÐì®ÉÞ©ÃÚ ½Ê´¾¬½ª³¯¡³¡±ªw§x¢ttnkorqq u t¤q¤z¥z©w§~¦t§z¨ ¬~¢­©·ªÂ«È³Í²Ë»Ð¶ÊµÆ²¿¬¾¯¼©¿¬À¬¾¬½¬·§½§»©»¥¸§Á¬Ã©Á¦¹©°¤¬¢¨ ¨®ªvEÓ>}©r¨¡q¦lK»JA´E>¯BJ Lesjub|{f||b{l­­Á¯¾ÃµÃÉ´ÈÆµÈÆ³ÅÈ³ÊÅµÈÆ±ÇÅ³ÈÆ³ÆÃ·ËÆ´ÈÈ´ÈÆ´ÈÅµÊÈµÈÄµÈÆµÈÇ¶ÊÈ³ÅÉ³ÈÆ²ÉÈ·ÊÆ¶ÈÊ¶ÇÈ´ÈÈ»ÌÉ¸ÌÉ¸ÊÇ´ËÌ¸ÈÊ·ÉÊ·ËÊ¹ÊÉºÌÊ¹ËË·ÌÉ¼ÌË¹ÐÌ»ÍÌ¹ÊÊµËÈºÏÊºÌÍ·ÎÊ¼ÌÌºÍÏ»ÎÌºÍÌ»ÐÐºÐÍ¼ÐÌ»ÐÌ¹ÐÎ»ÎÌ»ÎÌ»ÎÌ½ÎÐ¿ÑËºÐÎ»ÏÎ¾ÑÐ»ÒÎºÏË»ÎÌ¸ÐÌ¸ÌÌ½ÎÎ¸ÎÊ·ÎË¼ÍÌ¸ÍÈ·ÍÈºÎÊ·ÌÌ¸ÍÉ»ÊÍºËÌ¸ËÉ·ÎÈºÊÊ¶ÊÉ·ÊÊ·ÈÊ¸ÊÈ¹ÌÉ»ÍÈ·ÌÆ¶ÌÈ¸ÌÌ¹ÊÊ¶ËÈºÊÉ·ÎÈ±ÈÊ·ÊÉ¶ÌÆ¹ÈÉ¸ËÄµÈÅ·ÆÆ¹ÈÈ¶ÌÉ¶ÌÊ·ÊÆ¶ËÇ³ÆÆ¹ÆÈ·ÊÇ´ÈÈ·ÈÆ¹ÌÈ¶ÊÆµÊÃ´ÊÇ´ÆÇ´ÇÈ·ÈÆ´ÌÃ³ÊÆ¶ÆÃ²ËÄ³ÆÆµÊÆµÌÁ³ÆÅ±ÅÆ³ÇÆ°ÆÄ³ÅÅ±ÈÁ®ÅÃ±ÈÆ²ÃÆ³ÄÂ´ÄÅ³ÄÁ²ÆÁ³ÃÂ³ÄÃ°ÅÅ´ÅÂ±ÆÅ²ÃÅ±ÄÁ³ÃÃ²ÈÃ±ÆÁ±ÃÃ®ÄÁ´ÃÁ°ÃÁ°ÆÁ°ÁÃ³Å¿¶ÅÁ°Ã½¯ÄÃ°ÂÁ­ÄÁ¯ÂÃ±ÃÂ¯ÄÀ°Â¿¯ÂÀ²Ã¾±ÂÁ®ÃÁ­ÁÁ°Á¿¯ÄÁ¬¿¾¯Ã¾®ÁÀ®Á»®Á½¬À¼°Á¼­¿½°Á¿®¿º¯Á¾®ÁÁ¯Á¾­¾»¯Á¼®Â½©¾º¬Áº¬½¼­ÂÀ­À½¬Á»©¾»«À¾«¾¼ª¾º¬¾¼­Á»¬¾»©¾¸¬½½¬»½¬¾¹®¾±¤³µ¢»¸¦·¹¤»·©»¸¦º·«¹º§¿¹©»¶§··¥º¹§¸¹¤»¸£½¹¤»»«¾»ªÀ¸¨¾¸¤¼»§½·«¹¼¨½¸¦¾¼¨¼¾ª»º¤¾¸¨½»¬À½¥¾¸¨Áº¦¿»©¿»©À»¬¾»§À»¦Àºª»ºª¿½«¿½©Á¼§½½¨Á¼§½»«À»¬À¼©Á»ª»½§Á½§¾¾­¿»«¿¾§Â»¬Â»ª¾¾©À»«À»­Á¾«Á»«¿¾¬Á¿­Ã½©¾¾®Á½¨Ä¿®Â¿°Â¿¬Â¾®Å»­À¾¬Æ¾¯À¼¬Á¾«Ã¾¬ÂÁ¯ÀÁ­ÁÁ¬ÃÁ¯ÂÀ¬ÆÁ¯Å½®Á½®ÁÁ®ÃÁ°ÃÀªÆÁ³ÆÃ¯Ã¿°ÃÁ®ÆÃ°Ã¿±ÄÁªÃÁ­ÅÁ­Ä¿¯ÇÁ°ÇÁ®ÃÁ®ÃÁ¯ÉÁ°ÂÂ¯ÆÄ°ÄÁ¬ÆÁ°ÇÃ°ÅÁ°ÇÁ³ÆÁ°ÈÀ°ÅÄ¯ÅÃ°ÇÆ¶ÈÃ¯ÉÄ¯ÆÄ³ÈÅ³ÇÄ±ÈÅ²ÈÃ³ÇÅ²ÊÆ°ÈÃ°ÅÆ²ÊÃ³ÇÅ¯ÈÄ®ÅÄ³ÊÇ²ÈÆµÈÆ°ÈÃµÈÆ´ÌÃ³ÈÆ±ÆÄ®ÉÆ²ÊÄ¶ÊÆ±ÆÅ³ÈÅµËÉµÉÆ°ÈÃ³ËÃ´ÈÇ¯ÈÈ±ÈÅ³ÈÊ±ÌÈ²ËÅ¸ÌÇ±ÌÈ²ÎÇµËÇ´ÊÇ¶ËÆ³ËÄ³ÊÈµÌÃ´ÊÈµËÉ´ËÆ²ÈÆ³ÊÈ´ÌÈ·ÊÇ³ÌÈµÌÊ²ÊÅ·ÊÊµÎË³ÌÈµÌÊµÍÊ´ÎÈ´ÊË·ÌÊ´ÌÆ·ÌÈ¸ÌÌµÌÊ¸ÏÊ´ÌÈµÎÈ³ÌÌ´ÌÊ¶ÍÊ³ËË¸ÎÌ·ÎÈ³ÊÊ´ËÉµÎÊ¹ÎÇ·ÍÈ´ÌÉ·ËÈ¹ÎÌ¸ÑË¶ÎÉ·ÌË¸ÏÌ¶ÎÉ·ÎÌºÏÌ¶ÌË¸ÌË·ÌÌ»ÎÌ»ÏÌ»ÐË¶ÍÉ¸ÎÌºÒÎ·ÍÈ¸ÐÌµÎÉ·ÎË»ÎÊ»ÐÍºÓÉ¹ÎÊ¹ÏÍ·ÐÍ¹ÐÉ½ÌÐ¸ÏÐ·ÑÎ»ÎÌ·ÐÌºÐÍ·ÏÌ»ÑÑ·ÎÊ¹ÐÍ»ÒÐ¸ÏÊ¸ÏÌºÎÐºÒÐ»ÏÎ»ÎÌ¹ÊÊ³Æ²´z¢qnuwwzxx¢{ª¤»©Ü«¸éµÀñ¸Äò¹Èõ»ÈõÀÎú¾Îø¼Î÷ÁÌ÷ºËò¸ÌÿîµÇÿß°»mÚ`®Éö¾Îù¾Í×u(ò!)ñ#%ò Ôlë·Êó¼ÎúÅÎúÊÕúÊÕúÎØúË×úÌÔúÄÖøÄÒøÈÑùÂÏùÅÐøÄÎøÁÒõÁÐò¸ÊïµÊí¸Êí¼Ìæ»ÈàÁÁoÞ_ü¶µºª"îwÀe­p·bëW»Lûxmêy¹UËI#ê´Î¯Õ´Ùºà·è§¿ï®Çô²ÈúºÐúÃÖúÉÝúÏåúÐèúÖïúàñúàõúäøúéúúðúúôúú÷úúöúúñúúéúúçúöäõúáõúÚïúÒìúÎäúÊßúÂÕú¹Ôõ²Îî®Ãà¾Ó·Ë®À§°£¯|­z¬{®x¬u¨q¡ifd]`Y`__jfaz£n¬o¯z§x¨m·¤º¦À¥È®Ë­Í´ÌµÊ³Ð·Ì´Ë²Â²Ã±Á²Ã¯Â­¾¨½«»§·£´¦µ£¹¡¸£¸¥½¸¢§¢¤b¸Wê-Þ*é[¹WDÁDéçêìYoakQug]tq]|w`¯¬»¦¸¾¬»¾©Á½ªÀ½¬ÂÁ¬¿¿­À¾¬ÃÁ­À¿¬Á¾¯Â½«¿À¯ÃÁ°ÃÂ­ÃÁ«ÁÁ®ÂÀ±ÁÂ¬ÁÁ¬ÃÁ°Ä¿°ÃÀ°ÃÁ®ÂÁ²ÆÂ°ÁÂ±ÃÃ¯ÁÃ®ÃÆ³ÃÁ±ÆÂ³ÆÃ°ÆÅµÆÄ²ÇÁ±ÅÅ°ÆÆ³ÈÃ³ÇÆµÇÆ·ÊÂ²ÄÅ²ÃÆ²ÆÇ³ÆÆ¶ÈÄ´ÈÆ°ÄÆµÈÇµËÈ²ÌÊ³ÈÈ´ÊÈ·ÊÊ¶ËÊ¶ËÆ·ÊÇ¸ÍË·ÇÉ·ÊÌ·ÌÈ¶ÉÈ¶ÉÈµÇÈ·ÉÈ´ÉÆµÉÅµÊÆ´ÊÆ®ÉÄ³ÆÄ³ÈÇµÈÆ´ÊÅ³ÉÅ²ÈÄ²ÅÃ³ÆÇ³ÈÆ³ÆÆ³ÇÄ­ÈÃ²ÆÄ¯ÈÇ³ÇÃ²ÆÇ±ÆÉ³ÈÃ²ÈÂ²ÆÃ³ÅÅ²ÅÇ±ÈÅ³ÇÄ³ÇÁ²ÅÃ²ÇÄ²ÇÂ¯ÂÀ¯ÃÃ°ÆÄ¯ÃÁ³Æ¿®ÄÄ²ÅÂ±ÆÄ´ÃÁ²ÅÄ®ÆÄ±ÄÁ²ÆÃ²ÄÁ±ÆÀ³ÀÀ±ÁÁ³ÄÃ±ÅÀ³ÆÁ«ÃÁ®ÃÃ°Ä¿®ÁÂ­Æ¿¬ÀÁ±ÃÂ¬Ã¾°Á¾¬ÂÃ«Ä½­À»¬Ã¾¬ÁÀ¬Á½¬Á¾®ÃÀ¬Á½«Á¼®À¼«À¾®¿Á¬Â¼ªÁ»«Â»¬À»¬À½®À¹­¾½«Á¾¬Á»¬¾¾­¾½¬¿»¬¿¾ª¿¾­Áº«À¾©Á»¬¿»«Á½ª¾½«Á»¬Á¼¬Á¹«¿º«»»¬»¼©Áº§¾»©¾º«»º¨Àº¬¾»§¾»¨½¹©¾»¨¾·©·º«½»©»¸¨¾»ª½·¥¼¹©»»¨»»¦¼·¥·¹¦¸·§½º§¾·©»¸¨¹µ¤ºµ§»µ¤»·¦»µ¨¾µ¨¹¸£º´¥º´£º´§·¶¨¶µ¦¸´§»´¤µµ§»¾¯¾½ªÀ¿­Á½¬Á½­¾Â®ÃÁªÁÀ¬¿¿¬ÁÀ©À¾«ÀÀ¬Á¿©¾¼¬Ã¿¯¿¿¬ÁÁ­ÁÀ²Â¿®ÃÁ¯Â¿¬Á¾®À¾¬ÂÁ­ÃÁ¯ÃÀ­ÃÂ¯ÅÀ©¾¾­Æ¾©ÀÂ¬ÂÁ®ÂÀ¬ÁÂ°ÅÃ¬Â¾®¿À®ÂÃ¯ÄÁ®ÆÁ¬ÄÁ­ÇÁ®Ã¾­ÅÃ¬ÆÁ³Æ¿­ÆÁ¯Á¿­ÅÂ­Ä¿³ÅÁ°ÈÁ°ÅÀ±ÆÃ¬ÄÁ¯ÅÄ²ÆÂ°ÈÂ³ÉÃ³ÄÂ®ÆÃ°ÆÂ¯ÈÃ±ÃÃ²ÅÂ²ÆÄ°ÊÅ³ÇÂ³ÇÃ°ÊÃ±ÆÆ°ÆÆ­ÈÄ²ÇÅµÊÃ³ÈÆ³ÌÄµÇÃ°ÈÅ³ÈÁ³ÈÄ´ÈÇ´ÆÂ®ÆÆ²ÆÇ±ÆÈ·ÊÆ²ËÇ´ÌÊ´ÈÈ³ÍÆ³ÊÅ³ÍÇ³ÊÈ²ÍÄ³ÈÈµÉÈµÊÇ¶ÊÆ´ÈÈ³ËÈ°ËÈ¶ËÆ¶ÊÈ´ÊÊµÊÊ¶ÊÈ³ÊÆ³ÊÇ·ÊÌ³ÌÇ¶ÊÈµËÊ¶ÈÊ·ÌÇºÌÆ²ÊÈ³ËÊ·ÏÈ¶ÉÊ·ÏÉ¶ÊÌ¹ÏÈ¹ÌÈ¶ÍÊ·ËÊ·ÎÈ³ÍÌµÌÊ·ÐÊ»ËÆµÌÆ¸ÎÌµÎË¶ÎÊ¶ÌËµÌÌ¹ÌÉ¹ÍÊ¶ÍÌ¹ÐÌ·ÎË·ÐÌ¼ÎÊ¶ÐÎºÐË·ÌË¸ÒÎ¶ÎÌ¹ÐË¹ÏÌ¶ÎÌ·ÏÍ¹ÎÌ¹ÌÈ»ÌÈ·ÎÌ·ÍÍ»ÎÌ¸ÐÌ¸ÑËºÑÌ»ÐÊ·ÎÎ³ÏÌ·ÐÎ¹ÎÍ·ÐÌ¹ÐÐºÒÏ»ÓÌ»ÐÌ·ÍÌ¾ÔÍ¹ÒÏ¼ÓÐ¸ÐÍ¼ÒÌ¹ÑÍºÓÏºÒÎ·ÓÒ¼ÏË·ÎÒ»ÒÐ¹ÒÍ»ÒÎ½ÑÒ»ÒÐ¸ÐÐºÒÎ¼ÒÎ¹ÒÎ¼ÒÐ»ÕÐ·ÐÐ»ÓÒ¾ÓÎ½ÑÏ¹ÒÌ¼ÒÐ¼ÐÐ»ÓÒºÒÒ½ÐÐ»ÕÏºÔÌ»ÕÍ»ÏÓºÖÐ»ÕÐ½ÓÏ»ÔÒºÒÓÁÖÑ¼ÕÑ¼ÒÔ¾ÓÓÁÕÐ¾ÖÐ¾ÒÎ¿ÓÒ½ÓÓºÔÑÀÔÒ»ÔÒÀÕÐ¾ÐÕ½ÖÐ¾ÓÒ½ÕÕ¼ÖÕ¾ÕÔÀÓÕ»ÖÒ½ÕÒ¼ÔÒ¿ÕÔ½ÖÓ¾ÓÓ¾ÕÒ¾ÐÒ¹Î»§Â«u|z¢¡ ¨¯£Á¯ä±¿í¾Åó»Êø»Ì÷¿ÎúÂÓúÁÕúÁÓúÃÒúÂÑö¿Ò÷¼Ñÿö»Óó¹Íî·Îï¼ÍóÀÑùÅÒùÁÒÛÍº°ÑØÇºô¾ÖöÈÕúÆØúÌÛúËÜúÏàúÓßúÕÞúÑÜúÎÚúËÖúÈÖúÈÓúÆ×úÄÖöÁÒô¾Òó¿ÒòÂÏøËÕúÏÜúÖáÝáÉù#÷ÛíÀÈyÚc÷
û÷iÐ[½¥¤ðï´u}µm&è#ªÎ¶_ÍQø
ª³Ý »Ú¤¼ä¨Âé©Áð°Åö¹Éú¾ÑúÃÕúÉÝúÌâúÒéúÞíúàóúâõúåùúêúúîúúôúúóúúøúú÷úúöúúïúºïºdõd¸è¶úÞòúÖïôÒà©Ùsãd¨ÑèµÄêªÅà¢¾Ó¶Ã¬»©¶¤·¤·³¶³~¥®w¬tªn«l¡©n¬n¨i¨l£i§gP½Hñµ©Ã¬Ê°^ÎRõ²§Ð¹Ó¡·Ë¢¯ÆÃ¸¦ß¯¼²¿}Õhu×cÎtÃ½¥à¬½Ù§¼Ø¤¾Õ¥»Ò¶Ò¢·ÌµÈ³Â¬¼®»¬»¦À©¿¨¿¦½¤·¤­¦8Ú3«t§q²hì¡w|sÝÖq[rW|n_zudi·¥®Á¬¼Á®¿Ã°ÁÆ°ÆÂ¯ÆÃ³ÄÆ¯ÂÄ±ÃÀ°ÅÄ¯ÅÃ±ÃÅ²ÆÅ°ÂÄ¯ÃÆ±ÅÇ³ÆÃ¯ÃÃ³ÃÆ³ÆÄ°ÅÅ²ÊÄ²ÆÄ±ÆÅ³ÆÅ²ÇÊ±ÊÈ´ÈÇ³ÆÆ²ÉÆ´ÈÇ³ËÈ±ÊÊ´ÊÈ¸ÇÊ´ÌÈ³ÌÈ·ÈÊ¶ÌÌ·ËÊ·ÈÉ·ÉÍµÈË·ËÌ·ÌÌºÍËµÍÉ¶ÌÌ·ÍÌºÊÊ¸ÍÐºÎÍ»ÌÊ¹ÍÊ¹ÐÍ»ÎÎ»ÌÍºÐÍºÌÎºÌÏ¹ÎÍ»ËÎ»ÐÐ»ÎÍ»ÏÌºÍË¸ÎÍ·ÏÌºËÎ¹ÐÌºÌÍ¹ÊÎ»ÏÊ¸ÌÊ¶ÊÌ»ÌÌ¶ÎË¶ËÈ¸ÌÈµËÌ¸ÊÊ·ÊÌ´ÊË»ÊÍ¸ÌÌ·ÎÊ»ÈÊ´ÌÊ¶ÌÈ³ÊÈ¸ÌÊ¹ËÉ·ËÊµÌÈ·ÌÉµÌÅ·ÌÉ¶ÊÊ´ÊÊ³ÈÈ·ÉÆ¶ÉÆ·ÆÊµÈÉ²ÈÆ±ÉÈ´ÈÆ³ÌÈ¶ÊÆ·ÈÈ´ÆÈ·ÊÅ¶ÈÆµÉÆ³ÈÆ³ÈÈºÈÄ±ÉÃ·ÇÊ³ÉÈ³ÉÂµÉÄ³ÆÇ³ÊÅµÉÆ³ÆÈ±ÈÈ³ÇÃµÈÃ³ÅÂ³ÇÃ³ÃÆ³ÇÁ¯ÃÁ³ÆÅ´ÉÅ³ÅÃ²ÃÃ²ÆÁ¯ÃÃµÄÃ±ÇÁ®ÃÀ³ÇÁ³ÃÂ±ÃÂ¯ÂÃ±ÅÃ®ÁÄ±ÃÀ®ÃÃ²ÆÃ°Æ¿±ÅÃ²ÄÅ²ÃÁ²ÂÂ¯ÆÀ¯ÁÃ±ÃÁ±ÃÁ±Å¿°ÅÂ°ÅÂ®Æ¿±ÂÁ¯ÅÀ±Å¿°ÂÁ®Á¾¬ÁÁ±Â¾°Ã¿¬À½®Á¾«ÁÁ­Ã¿®Á»¯À¼¬À¼±Á¿¯Á¾®ÁÁ¬¾¾¯Â½¬Â»¬¾¼¬À»¬Á½«¿½­¿¾ª¾½¬¾»­À¼©¿¾ª¾»¬Á¼©¿½ª¾»¬À¼¬½½ª¾¶¬¾»ª¼»«»¼ª»±¤²·¡¹·¡»¼¦»·¤»º¦»»ª¼»¨»º©½·¤»·¨¼·£»µ¤»¹©»¹¤½»«¾¾¨¿º¤»¹¨»»§¼»«¾»§½·©½¾§»º¬½¸¬¾½§À¼¥»¾ª½»©½¼¨¾¸§¼¹«¼»¨»»¨»»¨Á»«¾»¨½¸¥º»©¾»¨¾»¨½¹§¾»¬¿¼«¾»¬À¹¨¿½®¿¾¬Ã½¬¾»©¿¼«¾Á®¿»ªÀÀ¬À¼«Á¾©¾¼®Á¾¬¿¾«Â¾¬Á¾©Á¾©¿Á¨À¼¨Æ»©¿¾ªÁ¾¬Â»¬Ä¾¬Ã¾®ÂÁ©ÁÀ®Â¿¬Ã¿®ÁÁ¯ÃÂ­ÁÁ«Ã¿®ÂÁ¬ÄÀ®ÄÁ¯ÄÁ¬ÆÁ¯Ã¿¬Å¿¬ÃÁ°ÂÁµÄÁ­ÄÁ®Æ¿°ÅÃ®ÆÁ°ÃÂ¬ÅÄ³ÄÃ¯Ç¿°ÅÃ®ÇÃ®ÆÃ³ÃÃ²ÇÆ¯ÅÅ­ÃÄ±ÈÃ³ÈÆ±ÇÁ°ÈÁ°ÆÆ®ÃÂ°ÃÆ³ÇÃ°ÆÄ°ÄÄ³ÇÄ°ÊÃ²ÇÈ´ÈÆ²ÈÅ³ÄÅ¯ÉÄ²ÈÄ²ÆÅ°ÈÈ³ÉÇ²ÆÆ²ÈÆ³ÉÆ®ÊÃ±ÊÆ³ÉÄ³ÈÄ´ÇÇ³ÈÆ²ÈÄ³ÊÇ²ÇÄ±ËÅ³ÈÄ³ÊÇ°ÈÆµÈÇ·ÉÄ³ÊÄ³ÊÈ³ËÈ³ÌÇµÈÈ¶ÉÈµÉÈ³ÌÇ²ÉÇ±ËÇ·ÊÅ·ÊÉ±ÌÇ³ÊÈ³ÈÄ¶ÊÇ³ËÆ¶ÉÇµÌÄµÉÈ¹ÊÊ´ÌÊ·ÊÆµËÈ³ÊÈ´ÌÉ±ÊÇ¶ÌÊ³ÌÊµÌÉµËÇ´ÌÊµËÇ·ËË³ÌË´ÊÇ¶ÊË·ÏË·ÌÆ´ÊÊ·ÊÉ·ÊÈ³ÌÈ´ÎÊµËÊ¸ÌÈ³ÎÇ³ÊÇµÌÊ´ÌÉ·ËÈ´ÌÈµÏÊµÊÈ³ÌÌ·ÎÊ²ÎÉ¶ÏË¸ÎÊ¸ÏÊ·ÎË·ÍÎ·ÐÌ¹ÎËµÎÌ»ÎÍ·ÏÊ·ÏË¶ÏÌ¸ÐËºÐÎ¸ÎÊ·ÐÌ¶ÐÊ¸ÐÎ·ÏÌºÎÐ»ÎÎ¸ÒË¹ÎÌ¹ÐÐºÏË¸ÍÌ¸ÎÎºÐÎ¸ÏÏºÏÍ·ÏÍºÏË»ÑÎ¹ÐÎ»ÑÎ»ÎÎ¸ÐÌ¸ÎÏ¸ÌÐºÎÑ»ÍÑ»ÐÎºÌÊ¶Ê¸»ªlouzxtzw{¢~­¦¿«Þ°¸ê´¾ó¶ÆóºÈöºÌù¾Ì÷ÁÎú¾ÏöÀÎò»Îõ¿Ìò¿Í÷¾Î÷»Ðú½ÏøºÏò»Êó»Ìù¾Ñú¾Òö¿ÑõÄÐúÃÔùÃÓúÃÔúÂÕúÄÕúÇÖúËÕúÎÕúÎØúËÔúÃÓúÃÎõ»Íô¹Ïí¸Èê»Çï»ÊòÀÎõÀÐöÌÖúÚØúÝÚúâÛêáÍÏà³á}(ô"²ÈRæC+ñ":ì/*ð"NäAÍ³ª½´Ès&ï ´°NÚA7æ.eÐXôóÇ¬§á¤¼Ý§¾á«¾è¬Áî²Áö·Èú»ÌúÃÒúÊÜúÑßúØåúÜìúãñúâöúãöúæúúíúúòúúõúúñúúùúúöúö-û-C÷B+ú+éöÓå_êU4ó-Eí:0ï(RàEÕ£¶Ð²Ãª¶£´²³· ³~µz¢´w¡³w¡³z¡·u¢ºx»z§¶z¡¶u£·{¡³{£¢vý÷«¤Ñ¡³ß­¹¥ÃýøÁ­Ú»× ºeÕU÷Ã·£Þ²¼PãC'ò $óCé: Èß¯¾Þ¬»Ü®¸Üª»Ø©¸Ö§¸Ò¶Æ³Â«½§½©¿£¾¦º§»£¹·¬¤ ¡¦DÌ>)Þ'znhh÷RZiUunQtkUokUwr_µª»§º»ª»»¬½»¨½½«¾»­½¾¬ÁÀ«¿½«¾¾«¾½ªÀ»¬À¾¬ÃÀ«À¾¬½¾­¾¾«¿½«¾¾­½À«¿¾¬¿Á®ÁÀ­Á¾¬½Á¯¾À°Á¾­Á¼®¾Ã°ÁÃ®ÃÀ®ÂÃ°ÆÃ¯ÃÁ±ÄÂ²ÅÂ®ÇÃ°ÄÆ±ÆÅ¯ÄÁ°ÃÅ°ÇÇ°ÆÃ³ÄÅ³ÆÆ²ÈÄ°ÃÆ´ÆÈ³ÈÈµÈÈ¶ÇÇ²ÇÊ³ÆËµÈÈ²ÊÆ³ÆÃ´ÈÉ·ÌË³ÉÈ³ÊÇ·ÊÌ·ÊÇ·ÊÆ³ÊÊ¸ÊÉ²ÊÈ·ÊÈ¶ËÆ³ÇÊ´ÊÇ³ÈÅ´ÊÆ´ÈÈ³ÈÇ²ÇÈ¶ÇÃ±ÆÅ²ÈÂµÄÇ²ÄÇ²ÈÄ´ÈÆ²ÈÊ±ÆÄ±ÅÆµÆÆ±ÄÃµÆÆ±ÇÇ±ÆÄ³ÄÂ±ÆÂ±ÅÄ²ÇÇµÁÃ±ÇÄ¯ÉÄ²ÇÇ°ÆÃ²ÆÃ°ÄÃ­ÃÂ³ÃÄ²ÁÃ¯ÃÄ²ÆÁ°ÂÃ°ÄÃ¯ÃÃ±ÄÁ­ÁÄ­Æ¿®ÄÃ°ÃÁ³ÂÂ­ÄÁ¯ÃÃ°Ä¿°ÄÀ±ÃÁ±ÃÁ²ÅÀ°Ã¿¯ÃÁ°ÂÁ¯ÄÀ®Ä¿®¾½±Ã¿«ÄÀ¬Á¼¬À¿«¿¾­Â¾¯ÁÀ­À¾¬ÀÁ®¾¾«¿¾°À½­¾¾°Á¿«Á½®¾¿«¾Àª¾¾«¿¿«¾¾®¾»¬¼À¬À¸«¿¼©Á»®À¾¬Á¾¬¾½¬¾¼¬¿»ª¾½¬¿¼¬Ã¾ªÁÁ¬¼»«À»§À»®¾½¬¾»®¾»¬¾¸ª¾¹«¼»§½º¬¿º«¼»©½·©»¹¬»º¨»º¦º·¬½º¨¾½ª»·§¼»«»·ª¼·§¹·£¼·¨·º§»º¨º·©¹¸§·¸§¸·¨··§¹¹§½¶§¸µ¨»¶©¹´£ºµ¤º·¢¶·¥º´¦¶µ¤·µ£·¹©·»¬½½©¾¾¬¾¿ªÀ»§¼¿¬À¾¬Á½¬¾¿¬½½«À½¨½¾­Á½®ÃÁ¬ÁÁ¬Á½®À¼¬Á¾¬Á¾«ÄÁ­ÂÀ¯ÂÁ¯ÁÀ¬Â½°ÀÀ¯ÇÁ¬ÂÁ®¾¿¬ÃÀ¬Ã¾­ÅÁ°Á¾«ÃÀ¬ÁÂ­ÁÀ³ÆÂ¬Ã¾°ÂÄ¯Å¿¯ÆÃ­ÂÁ³Â¿®ÂÀ«ÃÁ®ÂÁ°ÆÂ²ÅÁ±ÁÁ­Ç¾³À¿­ÄÂ¯ÅÃ°ÅÄ¯ÆÁ°ÆÃ¯ÆÃ®ÃÂ±ÆÃ¯ÈÃ±ÅÃ³ÇÃ°ÅÃ²ÄÂ®ÆÄ°ÈÃ®ÅÇ¶ÇÃ®ÇÃ´ÉÁ³ÇÃ°ÅÃ®ÈÅ³ÆÃ¯ÆÅ³ÆÆ³ÇÅ¯ÉÅ³ÉÃ³ÅÈ¯ÈÃ²ÈÆµÆÇ°ÈÆ±ÉÆµÊÄ³ÊÆ³ÈÄ´ÈÇ³ÆÈµÍÆ´ÌÈ³ÊÇ³ÈÆ³ÊÆµËÇ³ÉÈ´ËÇ¶ÌÆµËÈ¶ÊÆ¶ÊÊµÊÈ¶ÌÅ¸ÊË·ÈÆ±ÌÊ·ÎÇ¶ÊÈ´ÊÉ¸ÌÌ³ÍÈµËÊ¶ÊÉ³ÌÌ·ÌËµÈÊ´ÌÈºÉË¸ÌÇ·ÌÊµÏÊºËÈµÌÌ¶ËÊµËË»ÌÌ¸ÌÈ³ÎÌºÊÍ³ÍË¶ÌËºÌÊ¹ÐÉ´ÎÊºÍÌ¸ÐÌ·ÌÉ·ÎÈµÎÊ¶ÌÌ¸ÎË¶ÑÎ·ÎÈ¹ÎÈ·ÍÌ·ÏÈºÌË·ÍÎ³ÏÍºÐÎ¹ÎÌ·ÌÊ·ÎÌ»ÐÏ·ÒÊ»ÍÌºÐÎ·ÐËµÌÌ¹ÍÐ·ÒÏ·ÑÌºÐÊ»ÎÌ¸ÎÌºÍÏ¸ÎÏ¶ÏÐ´ÎÍºÐÐ¹ÐÍ´ÏÐºÐÐ»ÐÍ·ÏË¶ÐÐ·ÒÐ·ÑÌ¼ÒÌ¶ÒÎ»ÎÌ¼ÓÎ·ÏÐ¼ÐÎ¸ÎÏ»ÐÐ·ÑÌºÑÌ¸ÐÍ¸ÐÐ·ÐÍ¸ÒÏµÏÍ»ÒÎ·ÓÎ»ÎÎ»ÒÏ¹ÕÐ»ÑÎ¸ÓÐ¹ÒÓ¾ÎÑ»ÓÐºÓÏ¿ÒÑÁÒÑ¾ÒÑ¿ÓÎ¼ÐÒ¼ÓÑ¾ÕÑ·ÕÑ¾ÓÑ¾ÕÒ»ÖÐ¼ÐÐ¿ÓÐ¿ÓÑ½ÕÒ»ÓÐ»ÕÑ¾ÒÓ¾ÔÐ¹ÒÒ¾ÒÕ¾ÔÕ¼ÕÒ»ÓÐ¾ÒÒ½ÓÑ¼ÐÓ¿ÔÒ¾ÔÔ¾ÒÔ»ÔÔ¼ÓÐ½ÓÒÁÖÓ¿ØØÀÓÕ¼ÒÕ¾ÑÒ¼ÏÂ§Á¦±uxz{{¤¥¡¬£¸©È£´æ³¾ð¸Çô¼Èø¿ÐúÃÍúÄÕúÇÕúÂÖúÅÕöÆÖøÄÐúÈÖúÃÙúÅÖúÅÖúÆÙúÆØúÆØúÊÖúÈÙúÈÙúÍÜúÌÙúÎßúÎÜúÏÞúÎÛúÎØúÒÜúÎÜúÊÙúÈØ÷¾Òò½Íî¼ÌÌÄ²Ø|àkàw¡ÝÚÔ¹°Üæjpê_mã]ÙyÁÇ¯½º¯(ë'EÛC(ì%®­Ë§±©º*ñ#ÒjïµÃ×¿°3ð*ÐñµÇ{Ûe,ò%ZäL4ï,Ò½²¢ÊË¿¯ï·Æë³ÅºÆuá_ÁÐ¢øÊÙúÏàúÖæúáîúæôúéôúæøúìúúíúúíúúòúúöúúöúúùúÖ÷ÖQûQ¼ó¼ðìð¥í£*ù(©ã¡)÷&Ü~ÖË¹Öw%ò¿±Ï¶Æ¯º§¾§»¥¿©Æ¬Ä¬Í®Ï³Õ¹Ø¸Û»Ý»Ú·Ü·Ø·Õ¡µÂ¬¥úHä;÷ÇÈ¨óÃÊàÔ»ü
OíCùÓÈ±ó³Ì­ÂýùÁ¸¦Ø®¹-ð%Kç?zØe¿Äæ¹¾ê¶Åí³Æé¼Åë¶Ãá³Áß¯ÁÚ¬¹Ø«¾Ø¤·Ì³Ç±Ç¬È¯Æ¯¼ª¶¢·¤°¡«¦¯°o·bô {~w&Ù%Üpd~u`u_{r[{tdzd³¡¬¾ª¹¿¯½¿¯¾Â­ÂÁ®Á¾®½Â«Ã¿­½Â«ÁÁ­Â¿©Á¾®ÁÂ°ÁÁ¯ÀÁ°ÀÁ°Ã¿­ÅÁ®ÀÂ³ÂÃ®Ã¾°ÃÃ®ÅÀ²ÆÇ³ÆÁ²ÁÅ°ÆÅ¯ÆÂ²ÃÃ·ÅÇ³ÅÅ±ÃÈ·ÈÂ±ÇÃ¶ÊÊ³ÈÈ²ÇÅ°ÆÅ¶ÇÈ³ÈÅ¶ÊÈ·ÇË´ÊÌ¶ÈÈ´ËÉ¹ÉÆµÊÎºÎÉ¶ÌË³ÍËºÌÍ·ÌÊ¸ÊË¸ÐÎ»ÏË¹ËË»ÌË»ÌÌ¸ÍÌºÌÎ¾ÍÍ¸ÌÌ·ÌÎ»ÎÐºÎÌ¾ËÎºÌÌ¸ÐÌ¹ËÎºÊÍ·ÏÊ·ÏÉ»ÎÌ¸ÐÊºÌÌ¶ÌÍ¸ÎÊ·ËÆ·ÈÍ·ÊÌ¹ÎÉ¹ÊÌ¸ÊÊ·ÍÉ·ÌÉ·ÉÈ¶ÇÉ·ÌÇµÍË¶ÈÉ·ÉÊ·ÈÆ¸ÉÊ´ÌÇ¹ÇË¶ÌÉµËË´ÈÈ´ÈÉ·ÊÇµÈÊµÈÆ´ÇÊ¸ÉÅ³ÇÆ³ËÆ³ÆÆ³ÉÈ¶ÊÆ³ÆÆ·ËÇ´ÉÆ´ÊÈ·ÇÆ³ÇÆ´ÉÈ³ÅÆ´ÈÆ³ÊÇ¶ÊÄ´ÈÅ³ÈÄ³ÃÃ´ÇÅ¶ÉÆ¶ÆÆ³ÉÇ³ÆÃ³ÆÅ³ÈÄ±ÇÃ³ÃÆ³ÄÃ°ÆÂ±ÆÃ¶ÇÄ°ÂÃµÆÁ´ÂÅ³ÄÁ²ÅÁ°ÄÅ®ÆÀ³ÁÃ°ÄÄ¯ÂÁ«ÃÀ²ÄÂ¯ÃÁ³ÅÄ²ÂÅ±ÆÆ²ÁÃ±ÃÁ°ÈÃ®ÅÃ¯ÃÃ³ÆÁ¬ÅÃ®ÂÃ²ÅÁ¬ÄÁ¯ÃÁ³ÂÁ­ÃÀ³Á¿°Å¿±Å¾³ÁÀ®ÂÀ¯Â¿®Â¾±ÀÂ­Á¿¬Á¾¯¾¾­ÀÁ¬½¾­¿½¬¿À­¿»®Á½¬Ã¾«Áº±À¾®Â¿©¿¾¬»½°Á»¬Á¼©À¾¬À¼¬Á»¬½¾©¾½¬Ã»©»¼¬¾¾«¹¾¨½¾«Á»¬¾¼¨À¼¬¾»¨¾·¨»¯¤³´§¹µ ·¸¦¸º§»»¥¾µ¦º¸©»»¥¼»£¸¸¥½¸§»¸§¾¸§¼º¨¾¹§»¹©½»§»º§ºº¨½º¤¾¸¥¾»«½»ªÁ»§»¹¨¾»«À»¨¾·§»·¨¾»¥»½ª¾º¥¾¾¨Àº¦¼½¨Àº¥¾»¨½»«¾»¬Â½«¼¾ª¾½©Á»¨¿º¬¿º«Á»ª¾¾ª¾½¬Ã½§Á¿©¾½ª¿¾¬Ã»«½¾®¿¾¬Ã¾¬½»©Á½¨Á½©ÁÁ¬Â¾«Ã¾©¾¾­¾À¬Á¾ªÁ¾«ÁÁ¨Æ¿­Á¾¬Á¿«Ã¿°Â»ªÁ¾«Ã¾«Á¾«ÂÁ®ÃÀªÃÀ¯ÄÀ­ÃÁ­Â¾¬Á¿«ÃÀ­ÆÃ®ÃÀ­Â¿¬ÆÂ®Ä½¯ÆÃ®ÆÁ°ÆÄ³ÅÂ®Æ¿®ÃÁ®ÇÄ²ÄÀ²ÅÃ³ÅÄ³ÇÃ¯ÆÅ¬ÄÁ±ÃÅ°ÆÄ¯ÆÄ²ÆÄ±ÈÂ­ÄÃ±ÆÃ³ÆÁ®ÃÄ¯ÈÃ°ÆÆ³ÅÃ³ÈÅ¯ÇÄ°ÇÃ³ÅÄ²ÈÄ¯ÃÆµÇÇ³ËÄ³ÈÂ³ÊÆ³ÈÈ´ÊÄ²ÇÇ²ÉÆ±ÌÅ´ÊÇ³ÊÆ³ËÈ´ÈÅ´ÊÆ³ÊÅ³ÈÇ·ÉÆ±ÉÅ´ÆÇ³ÌÆ°ÈÇ¶ÊÇ³ÈÈ·ËÈ´ËÆ³ÇÅ´ÆÈ´ÊÅ²ÊÈ·ÉÆ°ÉÇ°ÉÈ¶ÌÈ²ÉÆ³ÊÆµÊÆ²ÊÆ²ÉÇ³ÊÆ³ÊÈ´ÈÈ²ÌÆ´ÍÈ²ÉÊ¹ÏÈµÍÈµÌÆ²ÊÆ³ÊÇ³ÎÆ³ÉÌ°ÊÊµÌÊ³ÌÆ·ÌÊ²ÌÉ·ËÈ·ÎÊ³ËÈ·ÎÉµÍÊ³ÊÉµÌÊ·ÎÌ³ÊÊ·ÎÉ¶ÌÈµÌÊ³ÎÆ³ÌÉµÍÇ³ÌÆ·ÍÈ·ÍÈ³ÏÊ·ÍÉ¸ÎÉ·ÐÈ·ÌÊ³ÎÌ²ÌÈ³ÐÈ»ÎÊ·ÐÉ·ÎÌµÎÊ¸ÐÊ·ÎÎ¸ÐÊ·ÎÎ·ÐÊ¸ÒÍºÏÍ¹ÍÌ¸ÍÌ¸ÎÌ¸ÌË¹ÌÌ¸ÏÈ¹ÒÎ»ÎË·ÎÎ´ÐÎµÏËºÍÏºÒË·ÏÊºÏÎ¸ÏÌºÏÎ¹ÎÍ»ÏÎ¸ÎÎºÑÎ¸ÐÏ·ÏÍºÐÎ»ÑÌµÏÐ¾ÑÒ¾ÓÐ¹ÐÎºÌÌ¸ÌÃ¨¾¨®tnrtzx|ys©o­¢Ã ²ß±¾ï´Äð·Æö¼Çù¾ÎúÀÏúÃÒúÃÐùÀÐ÷ÀÐúÃÏúÇÕúÈÕúÇÕúÄÖúÉÕúÊØúÇØúÆ×úÄÙúÅ×úÊÖúÑÙúÎÛúÍØúÎØúÍÙúÎÖúÊÕúÃÓö»Ìï³Ìã±Ææ³Ææ³Ë¯ÐKìB&õ ù1ð)Ìµ²aØT ðÿú
öÚ`Õ`êb¯dçe¢hÿ
ù	dÏXµ²xÓa*ò"ËÁ¡ußa«Ð¿Ò¤6ó0räbrábøÐ½¯íµÈÑ~õ=í2"÷ÙúÎÛúÖáúÝéúÝêúãðúáöúèõúæúúêúúïúúóúúöúúöúøôøÚðÚîèîúã÷gðe?ô>ìÎ×~ãpø
üøoÓ^Ñ²È¬¼¦»¦½¢¿¨Ã«Ê®Õ³ß£¹ç¯¾ô±Æò«Æì«Áë¬Àé¬Àè¯¿è­»â«»3î*õdÛTúÓ}ÕÅ³6ò, øqä\û
¦ÕÒÇ­ûLå>öÂ°£Ó¨´)î##ð1í)!õÍ~ê·½ç³Ãæµ¾ã³¾ã±Áà°¾ß¯¹à®»Û£»Ö¡´Ð ´È°Á¬Á¥Á¥º¡¬¡«£¥ªbºXÿ {¡zuløY\tW~i]rgSrlQwk[~z`°¨µ¦´¼§¸·¦¸¹¦¼¼§»»§½¹ª¼¼«¼»§¾º¥¶»¨¾»¥»¸¦½»«¾¹©¼¶§»½«¼¼¦½»¬»»¬¼»§Á¾«Á»«¿»¬Á½­¼¼®½¿¨Àºª¿½®À¾¬¿¼­¿¾®ÂÃ­ÁÂ¬Ã½°ÁÁ®ÂÄ¯ÄÀ­ÃÃ°ÁÁ¬ÄÂ°ÃÃ³ÅÃ°ÀÃ¯ÅÆ²ÄÄ±ÆÁ±ÅÃµÄÈ°ÆÃ²ÃÆ´ÃÈ°ÊÈ´ÅÆ³ÆÇ´ÆÇ±ÈÆ·ÈÊ±ÌÇµÈÄ³ÈÆ³ÊÉ±ÈÊ¶ÈÇ¸ÊÊ±ÊÆ³ÇÊ·ÊÇ²ÈÈµÆÇµÊÇ´ÈÆµÈÆ³ËÇµËÃ³ÆÅ³ÈÇ·ÊÁ²ÅÆ²ÆÄ²ÆÆ³ÈÇ³ÆÆµÊÅ´ÇÅ³ÆÃ³ÆÃ±ÆÃ±ÆÃ°ÆÃ±ÆÆ³ÆÄ³ÇÇ°ÇÁ´ÅÃ´ÅÄ³ÃÆ³ÆÁ³ÇÄ³ÄÃ±ÆÂ´ÃÆ°ÅÁ®ÃÁ²ÃÄ®ÆÀ±ÅÃ²ÆÂ³ÆÁ­ÄÁ¬ÃÁ®ÅÁ°ÁÁ²ÄÂ¯ÇÃ®Æ¿­ÅÂ³ÁÀ®Â¾¯ÁÁ®ÃÁ¬ÄÀ¯Ã¾°ÃÀ®ÃÂ³ÅÁ®ÃÀ­Ã¾¬Ã¾²ÀÁ°ÂÃ«À¿¬¾¾®À¿¬Á¼¬½¾¬¿½­Ã¾ª¿¾ªÃ»ª¾½®Â¿©À»ª¾½«¾¿«ÀÀ¬¾¼§Á½¬¾¼«À»¬¾»­¾¿¬¿½®Á½¬¾½¬¾¾®Â¿°¾¿¬Á¾ªÂ¿¬¿¾¬Á½¯Á»­¾¾¬À¿«¿¹¬½»¬¿¼©¿¹ª¿»¬½»©½»ª¿½¨½·©¾º©¾»¬¼»¨½·§¾¹©½¶¨»º¬»»§¼¹§¾º§¾¶«º¸§º·§½¶¦»·ª»ºª¼¸§¼º¨º·¨»·¦¹·¦¸·©»·¨·´¦»·£»µ£¶¶¦ºµ¨¸¶¦¸·¦¸µ¤º´¨º¼¬¿¿ªÀ½¬Á¿¬À¾©Á½°¼¾¬¾¼¬À¾¬Á¿¬Á½¬¾¿¬¿¿¬Á¾¬ÀÀ¬¾»®ÁÀ¬ÂÀ¬¿¾¬Â¾©Á¿¬Â¿°ÃÀ¨Á¾¬ÁÀ¯Á¿°Ã¾¯ÁÀ¯Á¿°ÃÂ°Â¾®ÁÀ­ÃÁ°Á¿­ÃÁ­ÃÁ­ÅÁ¯ÃÁ³ÃÃ¯Ä¾¬Ä¾®ÃÁ¬Æ¿¯ÄÀ±ÃÆ°ÅÃ­ÃÂ®ÁÃ°ÅÀ¯ÄÃ±ÄÁªÃÁ­ÃÂ²ÂÃ¯ÆÂ¬ÆÂ®ÅÂ±ÃÃ±ÅÁ¬ÅÃ³ÁÃ±ÈÃ°ÇÃ­ÃÅ°ÅÁ³ÇÅ°ÈÆ¯ÈÅ²ÇÃ³ÇÆ³ÈÃ±ÆÄ³ÈÅ²ÆÅ²ÊÆµÆÆµÆÇ±ÌÄ³ÈÄµÅÆ°ÇÆ±ÈÇ³ÃÃ³ÅÈ´ÈÆ³ÉÄ²ÈÆ³ÈÅ²ÈÉµÌÈ³ÉÈ·ÈÆµÊÇ·ÈÆµÌÊ·ÇÆ¶ÈÅ¶ÈÉ³ÌÈµÊÇ³ÊÇ³ÇÊ·ÌÇ³ÈÊ¹ÌÈ³ÌÉ·ÌÈ¶ÈÆ¶ÌÇ·ÉÊµÊÌ´ÌÆ³ËÈ·ËÌ·ÌË´ÍÈµÉÊµÎÈµÌÌ¶ËÊ·ËÌ·ÊÈ·ÌÈ¸ÌÎ¹ÌÊ¶ËË·ÎÌµÌÌ·ËË¶ÌÌ»ÎÌ·ÌÍºÐÌºÐÏ·ÌÊºÌÊ·ËÎ¶ÌÌ»ÍÎ·ÍÊºÊÍ·ÐÍ¹ÏË¹ÐÊ·ÌÊ¸ÍÎ¹ÏÍ·ÎÌµÏÍ·ÎÊ·ÍÉ·ÏÌ¸ÎÊºÍÊ»ÐÎ¶ÐË·ÐÏºÏÊ·ÎËºÌÊ·ÒÌ¹ÒÌ¹ÏÎ¿ÑÎ·ÒÎºÐÌºÐÎ¶ÐÍ¶ÑÌºÐÏ»ÓÌ»ÐÍ·ÍÌºÑÐ»ÒÎ¹ÐÎ¹ÐÏ¶ÎÍ¼ÎÎºÐÎ¹ÓÌ»ÎÐºÒË¶ÒÍ¼ÑÍ¸ÑÍ·ÐÊ¸ÎÍºÐÑ¼ÐÏ»ÐÎ¹ÒÐ¸ÕÐ¸ÒÐ¸ÐÏ¹ÑÐºÐÐºÑÑ»ÓÍ¹ÐÎ¹ÐÎ»ÔÒ½ÒÎ¼ÐÒ»ÓÐ»ÕÑ»ÒÐ¼ÒÏ»ÒÐ¾ÒÎ»ÔÐ½ÓÐ½ÒÎÀÒÓ¼ÒÑ¹ÒÐ»ÓÖ¾ÓÓ¼ÓÐ½ÕÓ¼ÔÔ¸ÕÓÀÑÒ»ÓÓ»ÑÒ¾ÓÔÁÕÓ¼ÓÒ¾ÔÒ¾ÒÒ¼×Ò»ÕÓ¾ÕÓ¿ÕÕ¼ÖÓÁÙÕ¾ÖÕ¾ÕÕÁØ×ÀØÖ¿ØÒÁÕÕ»ÑÊ¯Ã®³{t{£|¨¬¡sªoôh½c¼°Ï©·í¸Ãô¿Ëô¾ÊøÀÐúÆÐúÆÔúÃÕúÈÕúÅÖúÆÓúÆ×úÎÖúÒÝúÓâúÖáúÖâú×áúÓáúÑáúÐßúÒáúÓßúÖâúÖáúØàúÖàúÑÞúÎ×úÁÓö·Ïì´Éë²ËîµÎë»Ëí¿ÎëÁÈáÁ¾nß]ü¨¬³¯¤£ÿÿ	þ	)÷'+ü'¬£§\ºZêÿíÿ!íï#ï ½¼ò±ÆØ~.ô('ø"IóA±ä¢þûÖË¶ÛÉ»%ö ÙyéÁÆÛx&ö!ÚÔ¿úÕãúÛëúãíúæôúè÷úìúúíúúìúúóúúúúú÷úú÷úúöúúðúúìúíûÌÝÄôËáWìO-ô'=î3,ò&MãAÌ¯Ê²È°Ë¬Ê®Ñ³Ó´ßª»ï·ÆúÅÐúÊÕúÉ×îÁÈªÑÖ¿²ó¶ÆÐº©ÍwQÝE÷ù
ø
þ)é)kÊgñ÷ùþ7ï,)ó! öqá^úÒ´ÄuÖe½·Ñ²°È#ô¯ËíºÆì¼Ãí»Äê»Åê·ÅæµÃã³Âä±Áß­¸Ùª¾Ø¦·×¥µÎ °Æ®¾¨¹¦µ¡®ÿYÅRÿp¹d¥}2Õ0ä{q{`wi~x]~z`ziq§¤·¦²»¬º¿ª¾¾«¾Á¯¿¿¨¾¿¬¾¾¬¿½­Á¼«¿½«¾¿­À¿¬¼½¨À¿«ÁÁ¨»»­»¿®ÃÀ«Â½¯À¿­Á¾­¿Á¯ÀÀ±ÀÃ¬ÂÁªÁÁ±Á¿®ÁÂ®ÁÀ°ÅÃ®ÂÃ³ÅÃ¯ÆÁ³ÄÃ°ÆÃµÆÄ³ÅÄ³ÇÄ³ÃÇ±ÆÅ°ÇÃµÈÆ´ÅÊ³ÈÆ·ÈÇµÊÇ¶ÆÇ·ÉÊ·ÊÊ³ÌÆ¶ÊÌºÌË¸ÍË¹ÊÊ»ÎÌ·ÎÌ·ÍÊ¸ÐÌ¸ÌÍ»ÎÍ¸ÍÌ¹ÍÈ¸ÍÍ¹ÐÍ¼ÐÌ¹ÍÈºÉÎ¹ÎÌºÎË¹ÊÍ¹ÎË·ÎÌºÍË·ÊÌ¶ÏÌºÌÊ¸ÊÌ·ÌÊºÌÌºËÌµÐË¹ÌË»ÈÎ·ÎÊ¹ÊÇ³ÈÊµÌÍ·ÊÈ·ÈË´ÉÆ·ÊÊ¶ÌË¸ÊË´ÌÈºÊÉ·ÉÈ·ÊÈ·ÉÈµÊÈ·ÈÈ´ËÆ¸ÉÇ´ÉÈ·ÈÈ¶ÊÉ¶ÉÇ¶ÌÆ¶ÈÈ´ÈÉ´ËÈ´ÆÈ·ËÇ¶ÊÆ¸ÈÇ²ÉÈ±ÅÆ¸ÈÆ´ÈÆ²ÄÇ³ÈÇµÅÅ±ÄÁ³ÈÆµÊÈ³ÉÅµÇÄµÆÆ³ÉÃµÄÅ¶ÅÅ²ÆÆ¯ÇÃµÃÁ³ÃÆ±ÅÃ´ÃÅ¯ÇÃ³ÆÂ³ÃÃ°ÅÃ¯ÅÁ·ÅÂ°ÆÁ³ÅÂ³ÂÀ³ÃÀ´ÅÀ¯Ã¿°ÁÁ®ÅÁ°ÂÀ±ÆÃ³ÃÁ¯ÂÃ²ÅÃ³ÃÂ´ÅÂ³ÆÅ²ÃÃ´ÄÁ±ÂÂ²ÆÁ°ÅÃ³ÂÅ·ÇÃ±ÂÀ³ÂÄ³ÇÂ®ÂÁ¯ÃÁ°ÃÀ°ÁÁ°ÂÁ¯À¿¯Á¿®ÁÂ¬Â¿ªÂº®ÁÁ¯¿À°¿À¯¿¼¬Á½°¿À°Á¼ª¿¼°À¾¯½½®½¼«À¼¬¿¾¬¿¾¬¿¾¯¾º«½¾¬¾¾®Á¾¬¿»«½¾¨Á¹®¿»¬À¹©½¹¯»½¬¿»¬¼°¢³¶¨¸º¤»º¤»·§»·£½º¢½¸¥º·£½º§½¸¥»·§¾»©¾»¤»·¨¾»¦º¹¤¾»¨¾½¤»·©¼»§»¸§»º¦¼¸¬½»§¿¹§¿¸©À»¦½¾ª¾¸¥»»©Á»¨½»§À¸«½»¥»º¨À¼©¾¼¨À¹§½½«Á»©¿¸ª¼¹«¿º§À¼©¿»§Á½ªÁ½¨Ã¼§½¾ªÁ»«¾¾«Ã¾©À¸¦Á¾«¿¿ªÂ¼¬À½¬Â¾§¿¾©¾»ªÃÁ¬Â½¬Â»ªÂ¾®Â¾©Ä¿¬Á¾­ÃÀ¬Á¼­Ä¾¬À¿ªÆ¿®Ä¿«ÂÀ®ÂÀ°Å¿±Å¾®ÄÀ¬ÃÀ¬ÄÃ¬ÂÃ­Ã¾­ÂÀ±ÆÁ°ÃÀ¬ÃÁ¬ÅÃ®ÆÁ°ÂÁ³ÅÃ°ÆÂ®ÄÁ³ÈÁ®ÃÁ±ÇÁ¬ÅÀ®ÊÄ²Ã¿­ÆÄ®ÇÀ¯ÆÃ¯ÇÄ°ÆÃ¬ÇÀ±ÄÄ¯ÄÃ®ÇÄ³ÆÃ²ÆÄ­ÄÂ°ÆÂ¯ÉÇ±ÈÁ°ÆÆ°ÊÂ¯ÇÁ±ÉÆ²ÆÆ®ÇÄ³ÈÁ³ÊÄ²ÇÆ±ÊÆ±ÊÈ³ÈÅ®ÆÅ¯ÅÆ³ÇÄ³ÊÆ´ÊÄ³ÊÆ°ÇÇ°ÊÈ²ÇÆ°ÈÆ³ÌÄ°ÊÄ±ÇÆ°ÊÈµÇÇ°ËÆ¶ÊÈ³ËÇ³ÊÅµÌÅ´ÇÉ²ÉÄ·ÌÆ³ÌÄµËÆ°ÊÉ·ÊÇ±ÊÆ³ÆÇ¶ËÈ·ÌÆ³ÎÄ³ÇÇ³ÌÈ³ÌÈ·ËÆ²ËÊµÍÈ¸ËÉ³ÎÈ¯ÊÅ³ÎÊ´ËÇ³ÍÇ±ÊÈ²ÍÈ²ÌÈ²ÊÇ´ËÆ±ÊÊ°ÌËµÎÈ®ÊÇ²ËÈ±ÌÉ³ÌÊ´ÌÆ³ËÆ³ÍÊ¶ÌÇ¶ÌÊµÊÉ²ÌÉµÌÌ³ÌËµÌË´ÌË·ËÌ·ÏÊ¶ÏÊµÌÉµÎÌ²ÎÇ¸ÐÌµÍË·ÊÉ³ÎÈ·ÎÌ·ÑË»ÏÊ¸ÌÌ·ÏË¸ÏÍ¹ÏÊ³ÏÍ¸ÎÌµÎÎ¸ÐÌµÐÎ¸ÐÊ¸ÒÊ¹ÍÌ»ÐÌ¹ÒÏ¸ÑÌ»ÒÎ·ÏÌ¶ÎÌºÐË·ÒÍ¸ÐÌºÐÎ»ÏÐ¸ÐÎµÒÍ¹ÎÎ·ÎÏ¸ÓÎ·ÏÏ·ÎÔ¹ÒÖµÐàµÓá¶ÐÞ»ÕÛ¸ÓÐ»ÓÎ¸ÒÂ«Æ«µunr¤w¤ |u-Ú+ïYÅR¾­Ô£·è³ÁïºÃñºÊô¿ÎúÃÎú¾Ðú¾ÓúÀÓúÁÑùÁÓúÈØúËÙúÏÜúÓßúÕáúÖáúÖàúÔßúÏßúÔÝúÓßúÖàúÔàúÓàúÎÛúÌØúÆÖøºÐí¯Èã§Äç«Çè­Åç²Æâ³Áß­ÀÕ¬¼¹¬ðîh¦howxÿùoírªú¤úze´e*Ü,ÿÄ¡°±­¡¿|y¾t«©¤Ø£½ñ«ÇÙÁ²ÛãýOõHûÖÏ¿½Ï£(ô"ÌÊ¬öºÐËÈ«)ô"½Ð¤úÍÞúÒæúÙéúÝîúãóúçöúéùúêúúòúúôúú÷úúôúúðúúìúñÿÈÜÁúÈéÝ4ñ-ÚÃ¶ï³ÉÉ·ª-ì'uÆeÆ«Æ¬Ê¬Ï¬Õ´Þ¦¼ô¼ÄúÇÑúÏÖúÌØúÈÖrß_÷É°©Ü¦¾¸=Þ8ÿóçS³\
õ·¯º¤c·bõkÁ^ñ÷ùþ4í,ÌÐ»®ç¬Âà£¾Â¯ª.ì'ËsÉÈ½ªæ¸Àé·ÃÍ½¯q×`ÍÙ¯·Ý¥»Ø§»Ò¥¸Ó¡·Ê ²Ä¬Áª¸£±£ÿy¦pÿõõô?Ð:6Ì5pow`t]{nWzoWxqU{t]q§ ±°¸¤µº£º¸£»·¥··§¾·¢º¸¥½¶¨»·©¼¶¢¸·¦»¸£»·¥º·£»·§»¶¥º¸©»¶¤º·¥»·¥»º¦¼º¤»¹§»¹¦¾»«½·§¾»¥¼»§¼»ª»¼¬À»«¾½«¿¾¬¿¾¬Ã½­½¾®¿Á«Ã¾±À¿®ÃÀ«Á¾¬ÃÀ°Ä¼°ÁÃ°ÃÅ²Ç¿±ÆÁ±ÇÂ³ÄÈ°ÈÄ³ÆÃ²ÄÇ²ÇÇ²ÊÄ³ÇÆ±ÈÈ°ÉÆ·ÉÅ¹ÈÈµÉÅ³ÆË¶ÇÊµÆÃ´ÉÆµÊÇ´ÌÆµÈÇ´ÈÊ²ÉÈ¶ÊÇ¶ÊÃ´ÈÈ°ÉÆ³ÈÇµÉÇµÉÆ´ÇÃ²ÊÅµÊÄ°ÇÅ³ÆÊ´ÈÆ·ÈÇ´ÈÅ´ÇÆ°ÈÄ²ÈÄ²ÉÄ°ÅÆ³ÇÄ²ÈÃ²ÇÅ°ÆÄ³ÇÃ³ÇÄ±ÃÆ°ÆÅ¯ÇÄ²ÄÄ®ÈÁ¯ÅÃ°ÆÃ¯ÆÄ®ÈÂ±ÃÃ±ÃÃ°ÆÂ°ÃÄ³ÅÃ®ÄÃ³ÄÄ²ÇÃ²ÁÁ³Â¿°ÁÀ¬ÇÁ¬ÄÁ°ÅÂ­Á¾®Ä¾¯ÀÃªÁÁ°ÃÂ®Ä¿®ÃÃ²ÆÀ®Ã»°Ã¿«Ä¿¬ÃÂ±Â½«Á¾ªÀ¾«ÁÀ¬Ã¾ªÂÀ­Ã¼­Â¼¬¼¾­ÀÀªÀ¿¬Á»¬¿½ªÁ½ª¿¾°Ã¼©Á»­¾»¬¼¾¬À¼¬¿½¬Á¼®¿»¬¿¾«¾¾°¾»ªÃÃ®Á¾«Á¾­Á¾ªÁ¾°À¿©Á½«Á¾®Á¾«À½¬½¾¬Á»«Á½ª¾½«À»©¾»©¾¾­¾»¬¾º©À»¨¾»ª¾»¨¿¸¦À¹ªÀº©½»§¼¹¨½»§¾µ£½¹©¹»ª½·§½¸¨»¹§»·¨»¸§º·¨½¹§½µ¥»·§»¹¦½·¨·»¦¼¶§º¹¨º¶¢»¸¦»·¤¸¸¨¸µ©·¼©½¾©Â¼ªÁ¼¯À¿«¿½¬Á¼¬Â»ªÁ»«¿¿³¿¼¬Â½­ÁÀ­ÁÁ¬ÃÀ­ÁÀ¯Á¾¯Á¾¬Á¼­ÁÁ®ÀÀ®ÅÀ®¿»­ÂÀ©ÁÁ¯Ä¾¯Ã¿®ÃÀ¬Â¾¬Ã¿¬ÇÁ¯Ã¿®Â¿¬Ã¾®À¾¬Æ¾­ÁÁ¬Å¿°ÁÀ¯ÂÀ¬ÅÂ«Ã¾­ÃÁ­ÆÂ®ÃÃ¯ÃÁ°ÅÀ®Ä¾®ÆÃ®ÅÁ°ÁÃ®ÂÁ±ÃÃ®ÆÁ±Æ¾±ÇÀ®ÄÂ°ÃÃ²ÆÂ®ÈÁ¬ÃÁ³ÅÃ±ÄÂ®ÅÃ±ÆÅ°ÅÃ²ÆÁ³ÃÄ¯ÊÁ®ÈÃ°ÆÃ®ÇÃµÇÂ®ÅÆ¯ÈÈ´ËÄ´ÈÆ´ÇÅ³ÈÂ³ÈÆ³ÊÆ´ÈÅ¸ÈÇ®ÈÅ³ÊÆ´ÈÅ°ÈÊ³ÉÄ°ÈÈµÊÆ´ÊÇ¶ËÆµÌÊ²ÍÇµÈÅ¹ÌÇµÎÈ·ËÊ¶ÊÉ´ËÆ·ÊÊ¶ÍÈ·ÎÈ³ËÅ´ÌÅµËË³ÉÈµÊÈ´ÌÉ¶ÉÉ·ÍÇµÍË·ÍÈ·ËÊ·ËÄ·ÎÈºÌÉ·ÍÈµËÉ³ÉÈ³ÎÌ¶ÌÊ¸ÍËµËË·ÐÈ³ÍÈ·ÉÊ»ÎÈ¶ÎË¹ÎË¹ÎÊ¶ÏÇ¶ÌË¹ÒÊ·ÍÉ·ÌÆ¸ÐËµÌÍ¸ÐÌ¶ÎÌµÎÊ»ÍÎºÏÊ¶ÒÌ¹ÍÊ·ÌË³ÎÌ·ÌÊ¹ÓÉ»ÎÊ»ÐË¸ÌÊ¶ÐË¶ÎË»ÐÌ»ÒÎ¹ÎÍ¸ÐÊºÏÌ·ÐÌ»ÏÉ·ÌÐ½ÎÊºÍË¹ÒÐ¹ÏÌ»ÎÎ·ÏÑºÐÎ¼ÒÎ¸ÒÊ¸ÐÌ´ÎÐ¼ÓÐºÒÏ·ÎÎ·ÒÍ·ÑÎ¹ÐÌµÐÒ»ÕÎ¾ÎÌ»ÐÍ¸ÒÎ¼ÑÐ¾ÓÎÀÒÏ¹ÐÎ·ÓÎ»ÓÏ»ÐÌ¸ÒÐ»ÒÐºÒÏ»ÒÍ¸ÒÑ½ÕÐºÑÍ»ÒÐ»ÔÌ·ÎÑ¼ÒÐ½ÒÒ¼ÓÒ¼ÒÐºÑÑ½ÕÎ»ÒÐ¼ÕÓ»ÒÐ¾ÓÒ»ÒÎºÓÓ¼ÔÒ½ÕÑ¼ÒÏÀÓÒ»×ÒÁÔÕ¿ÕÏ½ÓÒ½ÑÑ»ÓÑÀÔÕ¼ÕÓ½ÖÒÀÒÓ½ÓÓÀÕÒÁÖÓÀÓÑ¼ÓÓÁÖÓ»ÔÛ»Õä»Õô¹ÓúºÙú½ÛúÀÜúÁÛë¼ØÝÀ×Ð±ÎºÀ¢©|¡ ~©§¦í_ËWÄ¢¶Û¬»ï·Çô¿ÍøÀÏúÄÒúÉÖúÆÙúÅØúÆØúÊÖúÌØúÐÝúÖâú×ãúÛåúÞçúàéúÞëúáëúÝéúÜäúàéúßçúÜäúÙãúÕßúÌÜúÁÖó´Òî¬Êò¯ÍðµÎì²Èç¯ÅÙ¦¾È´Á²ª¢¡eµeéx~¥¢+à*"á&EÉKómbÂ_ î0ã/ï|×oêÆÌmä^ø¶µ«ÖªÅê­È°Èù!ø útõný¨âà4ô.ÞÎÁúÆØÝË¾3ò,¦ÚúÈàú×çúÛëúàòúèöúêøúíúúîúúòúúøúúøúúøúÿ÷ÿíÇáÀÝÐÓ³×£,ô&¦ÓÈÀ­Ì$ð ¹Í²Ò¨³Ù©ºà©»ç³Àõ¾ÉúÐÒúÕØúÕÝúÆÙµÍýù¶±¥Ê©¿È¥»ÿQÉSÿ¢MéRçúÊúúÝ²Á¯?ÈBÿlÁd÷¦¿µÅKç>§ÊÂ¿¤tÓb'î!TÜH÷È»§éµÃÕÄ±$õ5ð,1ï*kÛ[ã°½à¯¾Ø«½Öª¸Ô©·Ð¥¶Ç°Å«À®·¦ÿ ¬{¬z¬{¤¢r|i|d~w`ubb{k®¨·§´¹«¸»©»º«¾»©»ºª¼·¬½º­¾¼©Á¼§»»¬º»­¿½­¼¼ª¾»«¾»«¾º¬¼½¬¼¹©¾½ª¿½¬À¾¬¾¼«¼À§¾¾ªÀ¿«¾½¬À¿®Ä½«À¿­ÁÂ°ÃÀ®ÂÁ¯ÃÁ³ÃÂ­ÃÃ¯ÂÃ²ÄÂ³ÆÃ®ÃÅ³ÆÆ°ÈÂ±ÃÆ¶ÈÅ´ÉÇ´ÆÅµÅÆµÇÇµÇÈ¸ÊÈ³ÉÇ¶ÈÈ¶ÈË³ÈÈ·ÌÅ·ÆÉ¶ÌÈ·ÊÌ¹ÉÌ¹ÌÎ¹ÐÍ»ÐÊºÌÌ¹ÎÊ»ÌË½ÎÌ¶ÊË¸ËÊ·ÌÈºÐÎ¸ÌÌ¼ÎÍ·ÍÊ·ÎÊ·ÍÌ·ÎË¶ÎÊºÌÊµÍË·ÌË·ÌÉ»ÎÊ¶ÌÊºÊÌ¶ÌÌ·ÌÊ·ËÊ·ÈÊ¹ÍÌ¹ÊÇºÌÆ´ÌÉ¶ÈÊºËÊ¹ÌÈµÊÎ·ËË·ËÆ²ÉÈ¶ÊÉ·ËÈ´ÊÆ´ÊÊ·ÆÈ´ËÉ¶ÆÆ¶ÆÈ·ÊÆ¶ÊÆ·ËÆ´ÈÆµÊÇ¶ÉÊµÌÆµÆÇ·ÉÅ´ÊÇµÉÁ´ÇÇ®ÇÃ¶ÉÆµÆÇ³ÉÃ³ÈÆ·ÅÈ³ÇÇ¶ÇÅ´ÈÅ³ÇÆ³ÇÀ²ÆÅ·ÃÁ³ÈÁ²ÃÂ³ÃÅ³ÇÇ±ÆÄµÆÁ±ÃÁ³ÄÂ³ÄÇ·ÆÃ³Ã¿²ÅÄ±ÃÂ¯Å¾±ÃÁ³ÆÁ®ÃÃ²ÃÃ®Æ¿²ÂÁ¯ÃÆ²ÇÂ±ÃÃ¬ÅÃ¯ÄÃ®ÂÃ¶ÃÃ´ÅÆ³ÃÃ±ÆÂ³ÈÄ°ÅÁ±ÇÄ¶ÅÁ±ÆÁ®ÂÃ±ÃÁ¯ÆÁ®Ã½¯ÃÁ®ÅÁ¬ÃÁ³Ä¾¬Ã¿®ÃÂ°Ã¿¯ÃÀ®ÃÀ­ÁÁ³Ã¿®Å¼¬À¼¬ÀÀ°¿¼¯À½®Â¾¯Ã½¬¾¾®Á¾«Á»¬Â½¬ÁÀ®Á½©¿½­Á¾ªÁ½¬¾»­Á¾­Á»¬Â¼¬À·«¿»ª¾¼¬¾»®¿°¢±¶£»¶¥»¹ªº¹¨»¸¥º¸§»µ¢»º¨¼»¨»¹¡º¶¦º·¥¾»¥º»¨¿»ª½¹¤¾»§»¹§¾¹§¼¹§»»§¼¸§»»§¼¸¥½»§¾¸©½º¥¿»©¿¸§»·ª¾»«Â¹ª¾»§¾¹©Á»©¾º¬¾º§¾·¨¾º¨¾»­À¹©½¼¦¾¼«À¼¬Á»«¾¹ª»»¨À»¬À»ª¼¼¬Á¾¦Á¹ªÀ¿«¿½¨Á»ªÁ¾¦À½®Â»®Ã¾«Á¾ªÁ¾¬À½«¾¾«Ã¾«ÁÃªÁ¼«ÃÁ«ÀÀ¬Ä¾©Ã¾¬¿À¬Á¿¬Â¾¬Á¿¬ÃÃ¬Ä¾®ÃÃ²Ã¾¬ÇÀ°ÆÁ­ÃÁ­Å¾¯ÃÁ©ÆÃ­Å¾ªÂÂ°ÃÁ³ÇÂ®ÅÁ³ÆÁ°ÆÂ²ÈÃ²ÆÁ°ÄÅ°ÄÁ¯ÇÃ­ÇÂ¬ÄÁ°ÆÃ²ÆÂ²ÇÀ°ÆÃ¯ÇÃ¯ÆÃ¬ÆÄ°ÆÂ¬ÈÂ°ÇÃ³ÆÄ®ÆÃ®ÇÀ²ÇÅ³ÈÆ¬ÇÃ³ÇÃ²ÊÅ³ÈÄ²ÃÅ°ÈÄ±ÉÅ±ÇÇ²ÈÃ³ÉÆ³ÉÆ³ÊÆ¯ÅÃ³ÈÅ²ÇÆ³ÊÃ­ËÈ°ÇÇ¯ÊÈ®ÈÆ³ÉÆ°ÈÅ´ÌÇ¶ÊÈ®ÉÅ²ÊÉµÈÈ²ËÃ³ÈÆ³ÈÈµÊÅµÈÈ³ÈÅ°ÊÈµÎÅ¶ÊÈ²ÊÈ³ÈÈ´ÉÉµÅÈ¯ÊÇ±ÊÈ´ÊÈ¶ÌÈ³ËÇ³ÈÈ·ÊÈ³ÌÇµÌÊ·ÍÊ³ÌÉ¶ÌÊ²ÍÉ³ÉÈ´ÊÇ²ÎÊµËÈµÊÉ°ÎÈ³ÊÈ´ÍÈµÌÌ±ÍÊ³ËÉ´ÌÊ²ÍÉ´ÌÌ¸ÊÊ²ÌÉ·ËÊ¸ÌÈ·ÌÊ·ÌÉ·ÐË·ÎÌ·ÎÈµÊË²ÎÈ¶ÌÉ¶ÌÉ·ÌË¶ÍÈ¶ÏÌ·ÎÎ·ÑËµÏÊ¸ÊÍ·ÌÉ·ÍÇµÐÌ¹ÎÊ·ÎÌ·ÎÊ³ÎÊ´ÌÊ·ÏÎ¸ÏÊ´ÊÊ¹ÏË·ÐÎ·ÒÊ¸ÎÍ·ÑÍ¹ÐÊºÎÌ¹ÐÏºÒÎ»ÏÐµÓÌ¹ÐÏ¸ÎÎ·ÎÎ¸ÓÍ»ÐÎ¸ÒÎºÑÍ¸ÎÎ¹ÑÐºÐÎ¼ÏÓ·ÑãµÏõ®ÐúµÒúÀÜúÈÛúÈàúÉÝú¾Ýö½ÖÜ³ÐÆÆ£±x¥x{£¢x¡ë\ÈUÇ°Ù¬»éµÃñ»Èõ»Ê÷¼Êú¾ÐúÀÒúÀÒúÁÒúÃ×úÈÙúÎÝúÕàúÙáúÜäúßèúÞæúßæúßèúÝéúÝèúÝâúÜãúÕâúÒáúËÙúÁØú·ÒöµÍø®Ìò°Éç«ÄÝ¢¾Ð³¹²«¨¶©¦!å"[©cª~ùa¡k[kýóa~u5ß3¿~°©­yÅy%õ!çxþüÉÇ²á´ÊºÇ¤Eê;øùúýÿ:ö6ä&÷!ÅÓ«úÈØÄÐ©&õ¼Ï£úÆÛúÇàúÓçúÛíúãòúçöúçúúîøúîúúïúúôúÿ·ô·ÿýüü`ëZìÅÖÛ|*ò#)ð#$ñsÌcÊ²Ê°Öª¸à«»ä°¾í¸ÂúÂÉúÅÑúÁÐúµÎß´¸úEá=ö³º¨á½Èä¸È³®©ÿïj¹m©¬©ã°ªúªÙúÙ¡¡¾d®hÿa¡hÿo||EÊA¤Å«{Îe&ò$ñ'ð Åný÷
¹²Ù¬¶Cé8Iè>·Ã½Á¢yÖgÒ¸°à°¾Üª»Ö¤·Ð¦³Ð¢±Î³Â¬Ã§¼¦²©ª²«¨udr_~l_xnQwlUwnW{~d­©³±·£´³£·µ¤¸·¸µ£·µ¥¸µ¡·³£µ¶¢¹¸ ·³¡·µ¥¸µ¢·µ£·µ§¼¶¢·³£¸·¥·µ¤º·§º¸¦¹µ¦¸¶©¸·§·º¨»¹¥¼·¦¹¸¤¼¸©»¶©»¼«¿º¦»¼¬Á¼©½¼«¾»¬º¾ªÁ»¬¾¾¬½¿¬Ã¾­Á»¬ÀÁ¬Á¿«Ã¾ªÄÃ¯ÁÁ®ÂÁ®ÂÃ¯ÃÃ±ÄÁ®ÆÄ°ÆÁ±ÆÃ³ÅÃ³ÆÆµÈÊ³ÆÆ·ÇÇ²ËÅ³ÈÄµÊÊ´ÇÆ³ÉÇ³ÈÇ·ÈÈµÊÅ²ÆÇµÊÆ¸ËÄ³ÈÇ³ÉÅ³ÈÇ´ÉÃ±ÆÆ³ÊÄ³ÇÆ²ÆÆ±ÇÈ³ÊÃ³ÈÆ³ÉÃ·ÌÃ³ÈÇ±ÄÆ²ÆÇ¶ÈÆ·ÈÅ³ÇÆ²ÆÄ²ÈÃµÇÁ³ÅÃ³ÅÆ²ÈÃ´ÇÀ®ÆÄ´ÇÁ²ÆÂ²ÄÃ²ÆÃ°ÆÄ¯ÆÄ²ÆÀ¬ÄÃ³ÆÄ³ÆÂ®ÈÄ°ÇÃ°ÅÂ¯ÃÃ´ÆÃ°ÆÃ°ÅÃ°Æ¿¬Ã¿¬ÆÁ®ÁÀ°Á¾­Ã¾­ÆÃ³ÃÃ¬ÀÁ±ÃÁ®ÃÃ±È¾¯¿¾¯Â¾­ÃÀ¬Â¾¬Ã¾­Á¼®Â¿¯ÅÀ¬Á¾­Á¾¬Á¾®Á¾¬Ä½®Â¾¬¾¾­Á»©Á»¬Á¼¥ÁÁ«¾½¬½¾ªÁ½ªÀ»­Á½­½¾­Á»¬Á¾­Á¾¬Â½¬½¾®À¼­Á»¬À½­¾¿®Ã¿¯½»«Ã½¬Àº«ÃÂ­À¿­¾»«¾»©¾¼«À¾¬¾»©À»«Ã¼©¾¼ª¾»ªÁ¹ª¾¿¬½¼¨Á¼«Àº©»»¬Á·§¾·«½½§»¸¦»»©½º¨½º£½·«¹º®¾¹¬»¸«º¶©»»¥½¶§»·¨»ºª»¹¨½¸«º·§½µ¦»µ©ºº¦»·¨ºµ¥¸¶¨¹»¨½¼«½½«Á»¬¾¾¬Á¾¬Â¼¨¿ºª¿½¬¿¾¨¿»§¼¼¬Â¾¬¾Á¬ÀÁ¬Á¿§ÁÁ¬Á¾­Ã¾¬Á¼¨À¾ª¾¿¬Á¿«À¼¬¿¿¬ÂÀ§ÀÀ®ÃÄ©Â½­Á¿­ÃÁ¬Å¿®¿Á­ÆÃ­Ä¾®Â¾°ÃÂ®ÅÁ¯Æ¿­Á½¬Ä¿®ÂÂ¬Â¿¯ÄÀ­Ç¿®ÂÁ©Ã¿¬ÃÀ¯ÂÀ¯ÃÁ®ÆÁ±ÃÁ¬ÆÀ®ÆÁ¯ÃÂ®Ç¿°ÃÃ³ÅÅµÆÂ«ÆÁ²ÆÁ³ÆÁ±ÆÃ¬ÃÁ±ÆÇ²ÆÃ°ÅÃ¬ÄÃ°ÆÃ¯ÅÅ°ÇÃ¯ÈÂ±ÊÃµÆÃ³ÈÇ²ÊÅ±ÆÃ³ÆÈ°ÉÆ³ÅÃ±ÆÇ³ÉÅ´ÇÀ°ÆÆ³ÈÆ³ÉÇ¶ÈÃ³ÉÆ¶ÈÆ³ÇÊ³ÌÆ³ÊÆ´ÉÆ´ÉÈ³ÌÅ³ÈÇ³ÊÈ¶ËÇµÆÉ±ÈÊ²ÊÉ´ÌÈ»ËÆ³ÈÅ³ËÉ¹ÊÊ¶ËÆµÌÅ¸ÌÉ´ÊÊµÍÈµÏÈ³ÊÊ·ÊÉ·ÐÈ·ÌÊ¶ÊÉ¶ÌÍµÍÈ¶ËÉµÎÊ·ÎÉ·ÌÌ´ËÎ¹ÌÈ¹ÌÊ·ÌÊµÌÍ´ÌÌ¸ËÊ¹ÎÊµÌÉµÌÉ»ÌË·ÌÌ·ÍÊ»ÎÈµÎÈºÐÊ¶ÍË¶ÍÌ·ÐÌ·ÎË¹ÐË»ÌËµÌÌ·ÏÊ·ÏÊ¹ÈÌµÎÊ·ÏË¶ÎË·ÐÌ·ÑÊ»ÌÌ»ÐÊ¹ÏÌºËÏ¸ÎÍºÑÌ·ÐÏ·ÎÍºÔË¹ÐÌ»ÏÎµÐÎ¹ÒÊ¸ÒÑ·ÐÌ¼ÎÍ·ÐÐºÑÌ¶ÓÍ¹ÑÐ½ÐÐ¶ÐÌµÐÎºÒÑºÐÎ¼ÏÊ¼ÐÒ·ÓÐ¸ÑÎ»ÕÎ»ÒÑ»ÔÒºÓÏ»ÒÎºÐÐ¹ÏÎ·ÓÌºÒÌ»ÑÑ»ÒÐ»ÒÍ¹ÓÑ¹ÓÒ¾ÕÍ¿ÔÒ»ÒÏ·ÐÏ¹ÒÎ»ÑÐºÒÎ¼ÕÑ¼ÕÎ½ÓÐ¼ÐÎ½ÕÐºÕÑ¾ÓÐ»ÓÓ»ÕÐ»ÔÒ¾ÕÑ¾×Ï¾ÒÐÀÓÒÀÔÓ¼ÑÏ»ÖÕ½ÖÔ¾ÕÒ¼ÒÓ¼ÕÒºÕÓÃÕÒÀÕÕ½ÕÓ¼ÕÖÂÓÖ¿ÒÖÁÑä¹Õõ¶Óú·ÓúÆÞúÎçúÒéú×îúÖìúÒëúÌæúÁÝï³ÑÃÂ²¸¨|©¦§­£¥ ¥ í^ËXÐ¨·æ´Âï¼ÈöÀÌøÀÒúÄÒúÅÖúÆØúÃÖúÄÚúËÜúÐßúÜáúÜéúàéúèîúéðúêîúéïúçïúæêúãìúáêúáéúÛêúÛäúÎãúÈàúÅÜúÅÙú¾×ù°Ïê¦Æ×¼È¸³´ÿ:Ù9½~³·gÔ^ì¤8ß8"í!¢	÷
,Õ0
ò}©¥¢·¿¸®Å¯»PâN9ó1ý
OøHüÕÙ½÷ÒÛêàÒãÑÍÿuàfÖÊÀàüÁè·äßØ8ö3iê`ÒÔ¼gê\7ó0êËÏúÇÜúÊäúÓçúÜñúçôúêøúïúúîúúñúúóúúöúúöúÿÚòÚÁîÁÁìÀÁæ¼ÚÝÏøÌäúÁßÛÀ¹§ÇÄµ¦Ò£·Ï¡¶Ö§µã´Àï¶Ãð»ÆúÃÊúÃÓú»Îö­Ìì®Ç5í.õiÜ^û£âêÞÊøÕÕÏ½À²eÆgð®HËPø¸£ª3Ð< è!-â,ÿ4Ó8{o¨g¦·y_ÖNNàA_ÛMü:ä3õ¹²Ñ³°0ï(6ï+ù4ð+ÔÁ²í»Æè»Ãæ¶Äâ¯ÂÚ°»Ó­¹Ö«ºÌ¦¶Ê ¯Á¬¸¦³£¹¥·¡´¤²« |q|dwgtb{diq³Ã¯©²²ª´Á^Ò_^Ó^^Ò_oËr ² ¶¨»¸¢»¶§º½§»º¥¼¹¨½¼§¾»¦»·©»¹¨½»©¾»«½»¨»¼¨¼º¨¾¼§½»¨½»§»»¬Á»¨¾¾¬À¹¬¿¾«ÂÁ¯¿¾°ÁÀ¬À¿ªÀ¾°ÂÃ¬ÀÁ¬Â¿³ÁÃ¯ÃÁ¯Â¾¯ÆÆ±ÅÅ³ÇÂ°ÅÆµÅÅ¯ÊÂµÈÈ³ÈÇ´ÉÆ´ÈÈ·ÉÆµÊÈµÇÈ³ÊÈ·ÌË´ÌÊ·ÊÈ¶ÏÌ·ÎÈºÎÍ·ÎÌ¹ÏÊ¹ÊÍ¶ËË¹ÌÌ·ÉËºÌÊ·ÌÉ·ÌË¸ÌÈ·ÎÉ·ÎÊ¼ÌÍ·ÊÈ¶ÌÈ·ËÎµËÌ¹ÎÌºËÊ¸ÍË´ÌÌ·ÌÊ·ÎÌ·ÎÆ¹ÎÌ¶ÌÌ·ÌÊ·ËÈµÎÊ¶ÌÉ¸ÈÆµËÌ¹ÍÉ¹ÉÃ¶ÌÉ¶ËÇ³ÈÉ³ÈÊ·ÊÇµÊÇ¸ÌÆµÊÇ³ÈÆ»ÈÈµÉÈ´ÊÇºÊÇ³ÉÈµÈÅ·ÌÆµÌÆ·ÈÆ´ÇÄ´ÊÈ³ÊÃ³ÆÆ¶ÆÊ¶ÊÆ´ÊÊµÈÃµÊÄ³ÉÄ¶ÈÆ²ÈÃ°ÇÃ¶ÇÄ³ÇÅ³ÈÃ±ÇÃ´ÈÁ°ÆÂ³ÆÅ³ÆÄ®ÃÁ³ÃÃ³ÇÁ¯ÆÃ°ÃÄ³ÃÂ®Ä¿­ÄÂ²ÆÁ¯ÃÁ­ÁÂ°ÃÃ­ÆÁ°Ç¿³ÆÂ³ÃÅ¯ÁÃ±ÇÃ¬ÄÁ°ÅÃ²ÅÆµÇÁ®ÇÁµÃÂ±ÆÅ³ÆÂ®ÄÃ³ÆÃ­ÇÃ²ÆÂ²ÇÃ°ÃÂ³ÄÁ°ÆÁ®ÃÀ°ÄÃ³ÇÁ°ÆÁ±Æ¿­ÀÃ®Å¿®ÅÁ³ÁÀ®ÃÁ­Ã¿±Á½®Â¼«ÄÀ¯ÁÁ®Â¿¬Â¾°Á¿ªÂ¾¬Â¾­Á¾°ÃÀ®À¾¬¿¾©Á¾«Å»¬¿»¬¿ÂªÀ¼¬Á»¯¿½­Á¼¬»»¬ÀÁ¬¿Á¬Á¾¬¿³¡µµ ¹·¦¹·§¹¹ª»·§¸¹§¼¸¡»¸¥½¶¥º·©½¶©¹»¥»º¦»º¥»»ªº¸§»·ª»º©¼º¥½¸¤¾¸ª½º§¾¹¦¼¹¦»¸¦»º£¼·¦»»©½·¨¿¹¥¼½©¿»¥½»§À»ª¼»¦¿º¨¾¹©½»¬Á·§¼·§ÀÀª¿¸£»º¬Á»©À¼§¾¹©Á½§¿¼«¾»ªÀ»­¿»­Á»§¼º¬Á»«À»¬Ã¼ª¿º©¾»¬Ã¾¬Ä¾«À»¬Ã¾ªÀ¿«Ã»§¿½«¿Á«Á¾¬Ã¾«Â¿­Â»ªÃ¿­¿¿®Ä½¬Ã½®ÃÃ®Â¼­Ã¾«Ã¾³ÄÄ¬Ã¿¯Ã¾¬Ä¾¯Å½¬Ã¿®Á¾®Æ½®ÄÂ¬ÆÃ®ÄÀ­ÄÃ®ÅÃ²ÆÁ°ÆÁ®ÄÂ°Ä¿³ÈÂ²ÆÁ¯ÆÀ³ÆÆ±ÈÃ¬ÅÅ®ÆÁ³ÆÆ¯ÄÁ±ÈÁ®ÅÁ²ÄÄ²ÈÄ°È¾°ÆÁ¬ÇÂ²ÈÁ±ÊÃ³ÆÃ²ÆÄ²ÆÆ°ÈÃ³ÅÆ®ÈÆ°ÉÃ°ÇÃ¯ÈÆ³ÇÆ³ÇÄ²ÊÄ²ËÅ²ÈÆ±ÇÅµÇÃ¯ÉÁ³ÊÇ³ÈÅ´ÉÆ°ÊÆ´ÊÇ²ÊÈµÊÆ·ÊÈ³ÊÆ´ÉÆ²ËÆ¯ÈÆ³ÈÈ´ÊÆ´ÌÅ°ÊÄµÉÇµÍÆµÉÆµÈÊ³ÎÆ·ÊÆ¶ÊÆ³ÉÅ³ÈÆµÊÇµÈÇ³ÌÆ´ÉÄ²ÊÉ³ÌÈ²ÊÈµÍÇ´ÎÇ´ÊÇ´ÍÈ³ÈÆ³ÊÊµÊÆ´ËÇµËÈ·ËÈ´ÌÈ´ËÈ³ÌÊ·ÎÉ¸ÍÇ³ÌÉ·ÌÈ³ÎÇ·ÎÉ´ÌË³ÌÆ·ÎÈ¸ÌÊ¹ÎÊ¶ÎË·ÎÉ´ÊÊ¶ÌÇ·ÉÈ¶ÌÈ¶ÌÊ³ÎÊ·ËÊ¶ÌÇ·ÌÊ·ÎÈ·ÎË¶ÌÊµÑÈ±ÎÎºÎÊ·ÌÊ·ÏÌ·ÎÍ·ÍÊ·ÌÈ²ËÊµÍÊ¹ÎÌ¶ÎÊºÎÌ³ÏÊµËÎ¸ÐËºÌÎ¸ÍÊ¹ÌÊ»ÑÎ·ÐÊ»ÍÎ¸ÏÌ»ÎÌ¹ÒÌ¸ÐÐ¸ÎÌ»ÏÎºÐÍºÎÎ¾ÐÐ½ÓØ·Îé²Ìõ²Íú»ÖúÃÜúÎãúÕêúØéúÕíúÓëúÒëúÏäúÁÜñ¬ÎÊ»ª®¡{¢ÿ¥í]ÊWÎ§³â°Áë¹Äð¶Çö½ÌúÀÎú¾ÑúÂÐú¾ÕúÆÙúÍÚúÎÛúÖáúÜâúßèúàìúêêúéíúèíúæëúàëúàìúâçúàêúÝçúÖäúÏàúÌßúËÜúÅÚú¶Óñ¥ÆÜ¾Ä·¿¯ÿ¼®ÿ#ñ #ó%ò!§·£­<Ú>³(è&ñNÍH÷m¼mª¬¤À¯±Á²³wÉtø.ö' ütõiý¨çêïØúÛ÷ÿ(÷$ÿú»ãÑÎ½iì_çß×úÝêÑÞÃ-÷)(÷#.õ(ÐÑµúÄØúÃØúÇÝúÐæúÖèúâïúæ÷úè÷úëúúïúúïúúòúúòúúïúúçúúçöúàöúØïúÓèúÍäú¾Ùø´Ðè«Ä×¡ºÎ´Ì±Ô§´æ·¾ð¼Äñ½Æù¾Ì÷´Éé§Æà¡Â®Á(ö!úüÿ:ø2©ëáÜÇÞ¼È³¥·¯'í$OÐMý	ôc{aêYÁWª]À]ëtHÇHôxEÁGëîüþO×CøÂw¼¹ù%ó¨ÊgÞU0ò'Ó¾±éµÄæ¸Áà³¾á®¾Ù¬¹Õ¦·Ð¡±É«¾©¸£´ ³¡²±¬¤|nt`lWxnWzr_zu`wp±oöhÈhµ±§¡ªPÔRððóô´²¡µ³¡·±´³¡µµ¡µ³¡´³§·³¢·°µ²¸²¡µ¯¡¶²¡µ²¢µ·¢»²¢µ¶£µ·¤·³¡¸³§··¥»·¥¸¶©º·¥»·¥»¹§¹»¨½·ª¾¹©¾»©¾¼©¾¹«¾¾¨Á»©¿¾ªÂ¾®ÀÁ­À½¬ÁÀ­Á¾¬ÃÁ¯Ã¿¯¾¿®ÃÂ±ÄÃ®ÄÃ³Ã¿¯ÃÁ¯ÃÇ³ÆÅ³ÇÄ³ÃÇ²ÈÆ³ÄÅ°ÆÆµÈÃ³ÉÄ³ÆÇµÈÇ²ÈÃ³ÄÆµÈÆ³ÆÆ³ÈÊ³ÅÄµÇÇ³ÈÄ³ÇÃ²ÈÆ³ÆÇ³ÈÆ²ÈÆµÆÇ·ÊÆµÉÆ³ÆÅ·ÅÆ±ÈÈ³ÌÃµÈÃ³ÆÆ¶ÇÃ³ÅÅ¯ÈÄ³ÆÄ·ÄÅ±ÄÃ³ÅÃ²ÆÁ°ÄÃ²ÇÃ¯ÃÃ²ÅÁ²ÆÂ°ÆÃ°ÅÃ®ÆÃ²ÄÇ³ÅÁ±ÆÁ³ÄÀ°ÃÄ±ÆÂ³ÆÃ³ÃÁ³ÄÂ°Å¾²Á¾­Å¾¯Ã¿®¿Ä¯ÄÀ®Ã¾¯ÆÀ³ÄÀ±Ã»®Ã¿²Ä¾®ÁÁ®ÃÀ°Á½®Ã¾®Â¿¬ÁÀ«À¿®Ã¾°Ã¾°Ã½¬Á¿¯Á½«¿»ª¾¾®¾¾«ÃÃ¬¾¼©Á¼ª¾»©Á¾­À½ªÀ¹®½»«¿½­¿¾®Á»¬À¾¬Á¾«¾»¬¾¾®Á¾¬Á¼¬¿¾­¿½°Â¼«À¿­Á¾¬Â¿«ÂÁ¯Ã¾°¿¾¬À½¬¾»¬À¼«Àº­»¿¬À¼¬¾ºª¼º­¾»ªÁ½«¼¼ª½·¨¾»©¾¹¬¾ºª¾»§··¨¼¼¬½»«¿»§»·§½¼©¾¶ª»¹©»¸¥»·«½ºª¾·¥¾µ§»º©»µ¥º¸§»µª¹º¦»·¤»·ª»·¨¼·¤¹¶§·»¥À½©¾Á¬¾½¬¿½«ÂÁ­ÁÀ©¿»¨»¼©¿À­Á¾©¿½¬¿½ªÁ¹¦À¿¬À¿¬Á¾¬À¼©ÁÁ®Á»¨Ã¾¬À¿­Â¼«¿Á«Ä»­¿ÁªÃ½ªÃÀ¬ÃÁ­Á¿®¿¾¬Á¿§ÃÀ­ÂÁ°Ã¿«Æ¾­ÇÀªÃÃ¬Å»®Á¾¬ÅÁ®ÅÀ¬ÃÀ¬Ã¿°ÁÁªÆÂ®ÅÂ­ÃÁ®ÄÁ³ÃÃ®Å¾­ÃÁ¬ÂÂ¬ÈÅ³ÆÁ¯ÃÁ¬ÆÁ¬ÃÁ°ÆÃ°ÆÀ¯ÄÃ³ÅÃ±ÆÆ¯Æ¿®ÆÃ±ÄÅ®ÆÁ±ÅÂ°ÊÆ´ÆÁ²ÈÁ±ÆÃ³ÈÃ³ÇÅ¶ÇÂ¯ÈÅ¯ÇÆ³ÅÆ±ÊÆ³ÉÃµÆÅ®ÉÇ³ÄÁ³ÉÉ´ÈÆ±ÉÅ³ÈÈ³ÊÄ³ÊÈ³ÈÆ´ÊË³ÉÆ°ÊÆµÈÇ³ËÃ³ÈÇµÆÈ³ÌÇ³ÉÈ¶ÊÅ¶ÌÈµÊÄµÌËµÌÅ³ÉÆ²ÈÈ³ËÈµÊÇ´ËÊ¶ÌÊµÌÈµÇÉ³ÍÉ·ÈÈºÌÈ·ÌÇ´ÌÊ·ÉÊ¶ÊÌµÌÈ¶ÌËµÈÌ¶ÎÆµËÈµÎË·ÎÎ·ÌÉ¶ÊÊ¹ÌÈ´ÎÈ¼ÎÌ·ÍÊ´ÍË·ÎÎ¸ÌÉµÌÊ´ÌÊ·ÍÐ¹ÐÊ¹ÍÇ»ÏÎ¶ÍË·ÎÌºÎÍºÏÍ¸ÐÊºÐÊ¹ÎÊ·ÎÏ·ÐÌ»ÕÈ»ÐÉ¹ÏÊ¹ÎÐµÓÌ¶ÐË»ÎÍ´ÐÊºÌÎ¸ÐÎ·ÐÌ¹ÐÎ·ÒÌ¹ÏÌ¹ÑÍºÐÎ¹ÑÎºÑÊ¹ÐÎ¹ÒË»ÐÍ¼ÒÐºÕÏ¹ÐÌ»ÒÎ¹ÑÌ¸ÒÎ»ÐÐ¸ÓÏ·ÌÐºÎÐ¼ÑÎ¼ÐÌºÑÑºÐÒ¼ÔÍ¼ÓÒºÒÎ»ÎÎ»ÒÎ¾ÕÎºÒÎ½ÓÍ»ÐÐ¹ÒÍ·ÏÌ½ÕÒ¼ÒÑºÓÐºÒÎ»ÕÐ¾ÓÐ½ÒÎ¾ÓÑºÒÐ¼ÒÑ½ÔÒºÒÏ¸ÕÒ¼ÓÒ½ØÐ·ÑÎ»ÓÒ¼ÕÐ¿ÔÓ½ÒÐ¹ÓÒ¾ÓÒ¾ÔÒ¼ÓÒ»ÖÒ¿ÔÕ¼ÐÓ»ÕÓÀÕÒÀÕÕ¼ÔÖ¾ÓÒ½ÔÓ½ÖÓÀÔÙ¾Ôä·Ðó¶ÍùµÓú¼ÙúÆâúÖëúÛðúÝòúÚóúÛôúßõúÛóúÛðúÈâõ¯ÑÓ¿´²ÿ¥¦ÿ£ YÊS¸Ö¬½ë·Äò¹Êô¾Ë÷¾ÏúÃÒúÃÓúÄØúÆÙúÌÜúÒäúÕâúØäúâêúåïúëñúññúðôúóõúíóúéôúåñúèïúæïúâíúßëúÚëúÙèúÓçúÄâú²Öí¢ËÉÀÇ»Æ¶Ê¹ÿÙ§¿ÏÃ­«×ÜÌÄìÅÑÊ³Æ©±¨±¼ò÷ùþ+í)ÇÅ±¹oÑnÿÞy(û#ýýÿ:ö6ºæ¯úôðêêèÿèxúÎîúÏïøÚêúáïúäïúãïèßÙ³ß¤èÔÐúÐÝúËÜúÈÞúÐàúÔëúÙïúçïúë÷úìúúîúúòúúðúúòúúóúúñúúíúúëùúãöúÛòúÕìúÎèúÁÞú»Òí±Êß§ÁÑ¤¸Ò¥¸á¶¾ï¾ÃùÈËúÆÒúÆÒú¹Ðì­Ìï¬ÍÿçáÓÖèÎéüÁê¯Éí¸RôJ¨Ö¦¿¦bÕ`ó	û	4Ü6
òmMÆPöû÷RÌSq³xýø
¡§¨¦t«oûüøþ4ë*Ë{øxßbô¾ÌÓË±/ó'¡Óð¼Ëï¾Ëì½Èì»Åä¶Àà²ÁÛ®ºÖ¬¸Ë±Ã­½¨»§¹¥¸¡·£¯riwg{dzd|lqy.á.ó\Ñ\µ¢¶´¤µ°¨°«¬¬§­¦)ì*.ç/¶§··£·¸¨¶·¤¹·¤¹¶§»¶¤¸·¥ºµ¤¸¹¢¹¸¦»·¥¼¸¡¹¶¤µº¤º½¨¾¹§¼¸¦¼»§½·£»¸©¼»§½¹ª¼½¬½¼«½½©¿¾¬½¾ªÂ»ªÁ¼¯À¿¬ÀÁ¬ÁÁ°ÁÀ¯Á¾­ÃÁ¯ÆÀ±ÃÃ°ÃÁ²ÁÅ°ÃÁ²ÈÆ³ÆÃ³ÄÅ²ÉÅ¶ÆÅ±ÆÈ²ÉÆ³ÆËµÌÇ·ÉÊºÊÊ¶ÊÎ·ÊË¹ËÈ¹ÌÌ·ÐÊ¹ÌÊ·ÌÌ¹ÍÊ¶ÍÉµÉËºÊÈ·ÊÉºËÍ·ÌÉ·ÍÊ»ÌÌºÐÊ¸ÍÊ·ÌÍ·ÊÊ¹ÎÊ·ÌÌ¹ÍË·ÎÌ·ËÈ¹ÊÊ·ÌÈ»ËÊ·ËÍ¹ËÇ¶ËÊ³ÌÊ·ÍÊ·ÉÊ·ÊÉ·ÊÉ·ÌÇ¹ÉÆµËÈ¶ÊÈ³ÈÈ¶ÌÇ³ÇÆ·ÊÇ¸ÊÈ·ÈÈ±ÇÊµÊÉ³ÈÈ·ÈÅ·ÉÇ³ÉÇ·ÌÈ¶ÌÇ¶ÊÈ³ÊÆ¶ÈÉ³ÌÇ³ÈÄµÄÆµÉÇ³ÆÃ´ÈÅµÈÈ³ÈÂ²ÈÆ³ÇÅ²ÆÁ´ÈÄ±ÊÆ¯ÆÁ¯ÅÈ³ÆÁ±ÁÃ±ÆÂµÆÅµÆÄµÅÄ¯ÃÃ°Æ¿°ÆÄ³ÃÁ¯ÆÄ±ÅÃ°Á½®ÆÀ¯ÃÀ°ÃÃ¯ÉÀ±ÂÃ°ÃÁ°ÅÃ³ÆÂ³ÁÂ­ÆÂ¯ÀÂ²ÅÅ³ÆÀ°Ã¿°ÆÂ¶ÃÆ¯ÈÂ³ÃÅ³ÅÁ³ÅÆ°ÄÁ³ÂÁ±ÆÃ±ÅÂ±ÁÁ®ÅÃ°Ã¿±ÆÂ²ÄÄ­Â½°ÃÀ±ÁÁ¯Ã½­ÃÁ¯ÃÀ±Á¾­À½³Â¿®ÁÃ¯¾»³ÃÀ°Â¾²Á¿­ÃÀ¬Â¼¬Ã¾°ÁÀ¬Ã¾­Á»¬À½°¿¿«Á½­¾½¬¿¼«¾»­½»¯Á¾¬¿»¬»½¬¿¿¬À½ª¾²£³´¤º·¤¸·¥¼µ¢¼·¦»µ¨º¸¦½·¦¸¶¦»¶§¼¸¦¹µ¥º»£»·¨¼¸¦»·¨½µ¦»³¦¸»§½¸§¼´¤¾µ¦¾»§¾µ¥»»§º·§¾¹«½»©»·§½»«¼º©¾½¨¿¸©½·«Ã»©½º§¾¸§¾»ª¾¸¨½¸©¾»©¾¹ª¾¸©¾º­À½¦½º©½¾¬Á¼©Àº©Àº®¾·©À¾«Á»§Á»«¾»§Áº«À¼«À»§Á¾ªÁÁ¬Æ¼©¿º­Â¼«Ã¾«Á½¬Á¼¬ÂÀ­Ã¿¯Á¾­Á¾©Ã¾¬À½°Ã¾«Ä¼®ÁÁ¬ÃÄ¬Ã½®ÄÀ®ÂÃ¬Â¾³Ã¿¬Ã¿¬ÅÂ®Å½°Ä¿«ÃÁ¬ÃÁ²ÇÁ±ÇÁ®Æ¿°ÅÃ¯ÇÁ°Å¿®ÆÂ²ÄÄ°ÄÃ°ÇÁ°Æ¿°Æ¿±ÇÁ²ÄÁ¯ÅÁ®ÈÁ°ÅÃ°ÅÃ°ÅÃ±ÇÁ³ÅÂ³ÈÃ°ÆÃ²ÃÁ°ÈÅ²ÇÆ°ÉÃ®ÈÆ²ÆÂ²ÈÃ²ÈÃ®ÈÄ°ÈÃµÈÃ²ÆÃ²ÈÄ°ÈÃ³ÈÃ´ÈÃ°ÈÆµÈÅµÇÄ´ÊÂ±ÇÇµÈÅ³ÊÃ±ÈÄ±ÆÆµÊÅ²ÈÃ±ËÅµÈÇµÊÃ·ÈÆ³ÊÈµÉÃ²ÊÉ²ÌÇµÈÅ´ÈÈµÊÇ²ÌÆ²ÌÌ´ËÈ³ÍÅ³ÊÅ³ÈÈ³ÌÈ²ÍÉ·ÌÈµÊÅ²ÈÆ·ÊÆµÊÈ³ËÆ¶ÌÈµÊÇ´ÊÈ³ÌÈ´ÊÈµÌÇ²ÉÇ´ÊÈ±ÊÆ·ÉÈ·ËÈ·ÌÈµÊË³ÌÈµÎÆµÊÈ·ÊÌ´ËÈµËÈµÊË·ÎË¶ÎÉ·ÌÈ·ÏÊ¸ËÊ·ÏÌ¸ÊÊ·ÌÊ·ÌÈ¹ÎÈ¶ÏÆ·ÍÊ¶ÏÊ¶ÎÌ¸ËÈ·ÍÊµÏÊµÍÊ¸ÌÊµÎÌ´ÏÊ»ÓÎ¹ÐË¸ÏÊ·ÌÈ¸ÎÌ¶ÎÇ½ÍÌ¹ÎÐ·ÎË¸ÏÉ¸ÍÈµÒÌ¸ÌÊ·ÑÊ¸ÏÊ·ÐÎ»ÑÊ¸ÎÌ¸ÐÌºÐÍ¸ÒÌ»ÎÎ»ÏÍ¹ÑÌ»ÎÎ¸ÏÍ¸ÒÐ½Ð×¹Ïç³Ìï¯Êñ¬Êú´Ïú½ØúÈÜúÕéúÙïúÙðúÙòúÜóúãôúßôúÔêú»Ûß¡ÃÁµ­©ÿ¥££³¥½®Ø§ºåµ¾î¶Èò¶Ëø¾Ìú¿ÏúÂÖúÃÕúÅÙúÊÜúÍÝúÓâúØâúáèúæëúéïúïðúðôúïòúðòúëòúçïúãîúäëúâíúáëúÛçúÓèúÆâú¹Öê§ÒÖÇÏ¾Ó»ÈºÇ·ÙÁæ©Âô¼ÉöÆÒúÎÒ÷Ò×ç¾ÒÀ§Äª´ÿ£¥¢±lÎløÁ¶«µbÒaÿÕ{ÿÌÜ¸ÔÜ¿äúÁÒ­ôÉàúÔèêÕß(ù&êyúÜïúàïúáíúäïúãêúàéúÙãúÍÜúÍÛúÊÚúÊÖúÊÛúÊÝúÒáúØëúÜíúáðúãõúéùúïøúíúúéúúëúúêúúâúúßõúÙðúØïúÎåúÅáú¾Ôú·Ìè¬ÄÚ§¾Ï ´Î¥³Ý¯»ì¾ÁúÊÌúÈÊúÃÎúÁÑú»Ðÿù¼ÒÿúÒÛÎÏ³hé[çÙÌúÙßè~)ó$!ñ ð #ð"ôPÑO÷d­f;Þ8 î-ê*í3Ü3
ù
=ä8÷°´¾±§tÿùn­eq»aö¨µÕ·°Mê>Gì9ÇÎ¥ßj*õ#ÏÌ­ðÁËì¿Èé¾Ãé½ÃçµÃß´»Û¯¿Ò¤µÉ®¾«¸¥µ£¸£¸ ³§zrxfq]qY|qdz`ïWÍW®³±±®³¬³´	ú	·®¯­²¬²°±¬²®²³¡´«°¯´°³®³° ³° ³³²®£µ° µ±µ³¦µ´£¸°¢´®µ²¡´±·³¢»°¡¶¸£¹·¤¸´§¹¹¢»´¤·¹¦·¸£»µ¨¹¸©»»¥»»¨½¹¬¾¾©¿½®À¼­Á½¬Á¾«¾¾¬À½­À¾ªÁ¾ª¿Â°ÃÀ°ÃÃ±ÆÃ²ÄÀ³ÇÁ²ÄÂ²ÇÅ´ÄÈ³ÇÁ³ÇÆ²ÅÆ²ÆÅ³ÅÄ³ÅÃ°ÆÃ´ÈÇµÆÃµÇÆµÈÇ³ÈÆ²ÇÃ³ÇÃ°ÊÆ²ÆÀ³ÃÆ³ÇÄ´ÈÄ³ÈÆ³ÊÆ±ÈÃ³ÇÆ¶ÆÆ³ÈÃºÉÆ¶ÆÇ³ÅÄ³ÈÆ±ÈÄ±ÆÆ³ÆÀ³ÃÁ®ÆÀ²ÅÀ³ÆÃ³ÅÁ¯ÆÄ³ÆÄ±ÇÁ±ÅÃ°ÃÁ®ÄÃ²ÅÁ²ÂÃ°ÃÁ±ÁÃ³ÅÂ®ÅÁ°Ã¾°ÆÁ³ÆÁ°Æ¼¯ÃÀ®ÃÀ²Á½°Ã¾®ÃÂ¯ÄÀ²Á¿°Ã½¬Á¾®Á¾°Â½¬Ã¾­Ä½¬ÁÁ°ÁÀ®Ã¿«Á¾¬ÀÁ¬À¼­Ä¼­Á½¬ÁÀ¬½¾¬Â¾¬Ã»¬¾½­Á¾ªÀ¼¨½¹®¾¾ª¾»ª¾»®Á½¬À»®¿¼¬Ã¾®À¹¬Á¾©¾½­Â¿®Á¾¬À½«Ã¾¬¾¼­Â¾°À½®¾¼®Á½ª¿½¬ÀÀ­Á¼­¿¼«Ã»«¾»°À¼¬Â¼­¿¹¬¾»­À½¬¾¸¬¾¿©Á»­¿»©¾»ª½»¨À·©»¼¬¾»ª¾·¨½»­¼ºª¾·©½¹©½º«¾º¨¾¶§º¸§¾¹©½·ª»¹§¹·ª½¹¦º·©½·¨»·¨½µ¥½·§º·¤»¶§»¶£»µ¬¹»©À»¬Á¾¬¿¼®À¿¬Á¾ªÂÀ¬Â»­½»«¿À¯Â¾«¾¹¬ÀÀ¬Ã»­À½°¿¾­Á¿ªÀ¾®Á¾®Â¾©Ã¼¯ÀÀ­Á¼ªÀºªÀÁ­Â¾¬ÃÁ°Ã½­¿¾­ÀÃ¯Á¾²Ã¿¯ÄÁ¬ÂÁ³ÃÁ­Ã¿­ÃÁ¯ÅÁ®ÃÁ¬Æ¾²ÁÁ®ÃÂ¯ÂÀ¯Ã¾³ÅÂ¬ÂÁ³ÅÂ®Ã¿±ÆÂ°ÃÁ³ÃÀ¯ÃÀµÄÄ¯ÅÃ®Ã¿¯ÄÁ³ÃÁ²ÆÂªÁÁ°ÃÁ³ÅÁ­ÂÃ³ÅÃ³ÆÁ­ÈÃ±ÇÃ³ÈÀ¯ÅÃ°ÇÃ³ÈÄ²ÆÀ²ÆÃ´ÆÃ±ÊÆµÊÄµÇÅ´ÅÃµÌÇµÉÃ³ÆÄ³ÆÆ´ÈÅ³ÊÇ³ÉÂ´ÈÃµÅÅ³ÈÂ´ËÊµËÇ·ÊÄ¸ÈÈ´ÊÇ°ÊÃ·ÊÆºËÉ´ËÇ·ÈÉ·ÌÈ¶ÊÊ·ÈÅ²ÊÈ·ÊÅ¶ËÇ´ËÆ¶ÊÈ¶ÊÈ´ÏÈºÌÆ´ÊÉ·ÈËµÉÈ·ÍÈ¼ÊÉ·ÌÉ·ÌÈµÌÇ¶ËËµÍÈ·ÎÉ·ËÊ¸ÍÈµÍÌ¹ÍÉ·ÌÈ·ÊË¹ÎÌ·ÌË·ÌÆ¸ÉÌ·ÐÊ·ÍÉ¹ÍË¸ÌÍºÍÎ¸ÏÉ»ÊÈ·ÌÉ¸ÍÌ¹ÎË¹ÐÈ»ÎÍ¹ÑÊ¹ÐËºÐÌ¹ÒÎ¹ÐÌ¼ÌÌ»ÐÍ¹ÏÎºÍÍ¼ÒÊ»ÌË»ÌÍ¹ÐÍ¹ÎÌ¹ÐÍ¹ÐÎºÎÌ¹ÒÊ·ÌÎ¹ÏÊ¸ÐÎ½ÍÎ¼ÎÊ·ÍÌºÐÍ¼ÐÌ¹ÎÊ¼ÑÐ¼ÑÌ»ÌÈ¸ÏÍ¼ÒÌ¼ÎÐ¼ÒÌºÑÐºÒÍ»ÐÍ½ÒÊ¹ÒÐ½ÑÏ»ÎÐ½ÐË¹ÓÎ¾ÒÍ»ÐÐ»ÒÌºÒÒ»ÒÍ¾ÒÍ»ÓÒ¼ÓÎ¼ÑÎ½ÐÒ»ÔÐ»ÓÎ»ÐÐ¾ÐÎºÓÍ¼ÐÐ½ÒÑ¾ÒÒ½ÖÎ¼ÓÒ½ÕÒ¿ÒÑÁÓÑ»ÔÐ»ÓÎ¾ÒÐ½ÖÒ¾ÒÎÀÕÐÀÒÒ»ØÏ¾ÐÒ¾ÖÓ¼×Î¾ÒÓ¾ÕÒ¾ÕÒ¿ÕÐÁÖÓÀÕÔ¿ÖÒÂÖÓÀÓÐÁÔÎ¾ÒÔÁÕØÁÒàÁÕð¸Ïô·Ìó«Ïõ¯Ëú³ÓúÁÞúÑåúÛîúáóúÞöúâ÷úéúúêùúàòúÍëí³ÒÙÄ¼´µ­¬©²¬Á³Í¤¹á±¿í»Æõ¿Ì÷¿ÎúÃÑúÃÖúÅÙúÆØúÈÚúÒàú×ãúÜçúÞèúêîúïòúóõúóöúö÷ú÷øú÷ùúô÷úðöúïôúïõúìöúëôúçðúÞñúËéú¾ßô³Ûî®Õí¦Íê§Ìä¡ÊÝ¥Èë±Ëö»ÓúÁØúÀ×úÊÛúÓÙúÌÛôÀÕÿÂ«ÄÿÁ¯Á¥Æ¡WáRºº·ÅøùÿúÿìÌÔÑÏ¿ièaçÏØúÐïúÛñòèîxöxµôµúòúúðúúìöúêòúèòúäïúÛçúÖâúÕáúÎßúÎÝúÎßúÒâúÖçúÙíúãðúæõúéùúëúúòúúòúúóúúíúúíúúäúúá÷úÞôúÕòúÐéúÌæúÁÛú¾Õð´Êà§ÅÓ¨·Õ¬¹â¹ÀðÀÆùËÏúÍÑúÍÕúÔØúÎàúÉÜÿúÈáúÄÜú½Ûø¼Û÷ÈÙúÇÛúÎßÛËÂ ÊÇòø
ùþ*ë)MÚI&ï%£¹·©¯¬ù
ù
fáXû
ÒÈ®³Æ³ÿ/Û-ÿ ¢VÓIÊ¬©ë·ÀìÃ¿Hï<ù*õ#ÏØ¯úÍÕùÌÓ÷ÉÒõÆÐñÄÎì¿Çí¿Èé¸Ãß°¾Î¦¶Ã±Â®Â¬À©¾¡³£­¡¥~lxkxfnq~ðZÑX±µ­£´±´³£µ.å/*è+¯¤±³¤³°£²²¦³µ¤³¯¤·´¢¶· µ°¶¶¦¹±¤·±¡²³§µµ¨»¯¢µ¶§·¸¥º·¥»µ§·´¨»¶§¹µ¦»º¥»¶§¸¹ª»º¬½»§»¹«¾º¬»»¨¾¶¨¼º¬¾»¬Á½¬¾¿°Á»®¿¾­Á¾²ÂÃ¯ÄÀ¯ÃÁ°ÃÂ³ÃÂ²ÁÀ±ÆÄ²ÆÂ´ÅÂ°ÄÅ¸ÄÇµÇÆ¸ÈÇ·ÊÈ´ÈÈ·ÈÊ·ËÉµÌÈ¶ÈÈ¶ËÌ¸ÎÊ·ÌÇ·ÌÉ´ÊÈ¹ÊÈ·ÊÊ¶ÍÉ·ÍÇ·ÊË¹ËÈ·ËÊ¹ÌÊµÌË¸ÊË¹ËÊ¶ÊËºÉÊ»ÌÊ¹ÍÊ¶ÎË»ËÌºÍÊ·ÌÊ»ÌÊ»ÌÌ¸ÍÊ·ÊË¹ËÉºÊÉ·ÊÈ·ÎÊ¶ÌÈ·ÉÌºÊÈµÉÈ¸ÉË·ÊÉ¸ÉÈ¸ÊÈ·ÈÊ¸ÊÇ¶ÉÂµÉÇ»ËÈ·ÆÆ¶ÍÅ¶ÈÉ·ÈÇ·ÊÈ¹ÈÇ¶ÊÈ´ÈÆ·ÈÆ¶ÆÃ´ÆÄ¶ËÆµÊÃ·ÆÅ´ÆÈ´ÊÅ´ÈÂ³ÇÄ´ÊÅ³ÈÄ¶ÆÃ³ÆÁ°ÆÀ³ÅÅ³ÇÃ³ÂÀ±ÆÃ±Å¿³ÄÃ³ÃÁ´ÅÃ³ÈÁµÃÁ°ÇÂ°ÆÁ³ÂÂµÄÀ³Ä¾³Ã¿³ÂÅ´ÄÂ±ÅÂ³ÅÁ³ÆÁµÈÂ®ÃÂ²ÇÁ²ÅÂµÄÁ³ÆÂ¯ÃÁ³ÂÁ´ÆÃ¯ÆÃ²ÆÃ³ÈÀ²ÆÅ°Ä¿°ÄÃ³ÃÃ´ÃÂ³ÁÂ¯ÅÁµÄÁ°Ã¿±ÆÀ°ÂÁ³Â¿°ÅÁ³Â¾¯ÆÁ¯Â¾±Ã¾­ÂÀ¯ÃÀ°Æ¿±ÃÁ³ÅÀ°Â¾¯ÂÀ²ÂÁ®Å¾¯Ã½­¿¾­Â½³À»°ÂÀ®Â»¯¿»¬Á¿­Â»®¿¿®½º®Á½¬¿¾¯½½¬À¹®¾¬¥¶·¥¹¹¥¹·§»¶¥»·¦·³¥»»¦º´¦»µ¥¼¶¦¹·¦»·¦½·©»º¥º»¨½¹©¼µ§½³¨½³©»»§ºµ¥½»¦½»©»¸«½·¨»·§À»¦½´ª¾»ª½¹§Àº¬¾º©¾»©¾¹¥½»®¾»¨Á»ªÀ¸¬¼»©¾½ª¿¸¦Á¼¬Àºª½º¨¿»¦¾»©¾¸©Ã·§¿½¬À¸«¾¼¦¿¹«Á¼©À¾¬¾»¨Â¸®¿º«¿¾§¾»©¼»°À»©À½¬¿½§Á¾¬Ã¼ª¾»®Â¾¬Ã¾¬Ã»¬Á¿®Æ¾®¾¾¬Á¾­Ã¿®Ã¿°ÁÁ®ÃÁ¬Ä¾¬Á¿­ÃÂ®Ä¾­Ç¾­ÄÀ®Ã¿°Ä½¯ÃÀ®ÁÁ­ÆÁ¯ÃÁ°ÆÀ°Ç¾²ÅÁ±ÅÃ«Ä¾²ÅÄ²ÇÃ´ÈÁ­ÃÁ¯ÅÂ­Ä¿®ÅÁ²ÅÂ®Ä¿°ÃÃ±ÇÁ¯ÇÀ¬ÄÄ°ÈÃ²ÉÁ®ÆÃ³ÈÁ®ÆÁ²ÈÃ±ÇÄ±ÈÁ³ÆÂ±ÈÄ²ÇÆ¯ÊÄ²ÇÃ®ÉÄ°ÇÄ³ÇÄ²ÊÆµÇÃ°ÇÆ²ÊÃ±ÈÁ²ÊÆ³ÇÁ°ÊÆ²ÈÆ³ÊÄ°ÈÃ±ËÃ³ÈÃµÊÅ³ÈÄ³ÈÈ®ÈÅµÈÆµÊÄ³ËÈ´ÈÇ³ËÄ²ÊÇ®ËÈµÉÇ¶ÌÅ¶ÌÇ²ÌÆ¶ËÅ±ÊÈ²ÈÆ³ËÈ¹ÊÇµÊÈ³ËÅµÊÈ´ÉÈ´ÌÈ´ÊÈ³ÈÈ·ÌÈµËÆ°ËÆµÌÈ³ÌÄ³ÌÆ·ÊÈ´ÊÌ³ÌÉµËÆ´ÌÈµËÈ´ÊÊ·ÊÃµÌÅ·ÎÊµÌÈµÌÊ´ÊÄ¹ÎÈ´ÏÈ·ÎÇ·ÎÇ·ÌË¸ÌÉ¶ËÇ¶ÌÊ¶ÌÈ¶ÎÉ¸ËÈ¸ÏÈ·ÎÈ¶ÎË·ÐÈµÌÊ¹ÌË¸ÍÌ¸ÎÌ·ÌÊ·ÏÌ·ÐÌ·ÌÊ·ÏÊµÎÍ¸ÎÌ¶ÍÌ¸ÏÌ¹ÎÌ·ÎË¸ÎË¹ÏË·ÒÊ·ÏÌ»ÐÌºÎÊºÐËºÒÌ¼ÌËºÑÏ¹ÎÌ¶ÐÌ¸ÐÎ¸ÑÌºÒÌ»ÎÌ¸ÎÌ»ÒÐ·Ïß¹Ïñ¶Èò®Êî§ÇéÃÙÀó§Æú¿ÙúÒäúÙëúÛíúØòúâöúç÷úàòúÑèú»Öß¢ÅÄ³®«¬¨±¦½®Ç¥µß­¿êµÂñ·Ìõ»Êú¿ÎúÁÓúÆÕúÆØúÉ×úÈÜúÓÝúÖáúÞêúäëúîïúîöúïóúòøúöùúöøúôùúïùúîöúíöúë÷úëöúæôúÛñúÓêúÇäú½Ýú³Û÷³Òò²Óí®Òô·Òú¿ÖúÀÚó»Øï¾ÒúÃØúÊÛúÇØúÁÔö¹Ôÿè·Ìã¹Éð¾ËîÁÎè¸ÌäºÄÎÀ´¹É¡ÁÏ¥ÿÚÌÃøËàúÌêøËêúÐîú×ïúãöúîùøõøú÷úúóúúí÷úéõúßíúàêúÛèúÖåúÒÝúÌÜúÎÛúÊÚúÉÛúÊÝúËáúÔæúÙìúÜïúáôúç÷úëúúðúúðúúëúúæúúÝ÷úÙôúÖïúÐíúÇåúÄßú½Øú³Îë­ÃÚ¡»Ð·Ð¦µÛ²»é»¿õÄÈúÇËúÌÓúÌÓúÖßúÑßúÎßúÌàúÈáúÃàúºÜú¹Ùú¼Ýú¾Ùø½×í±Ïÿ·¯®¨½¦uÒqø¹»~ ð wÆt¬SÎVüøû
þ5í,¨ÀØ·¤ÿuso¢¤z¡¶¡Ó´â¬ºó¿ÃôÅÌ¾Û èÐÅúÈÓúÍÓ÷ÉÒøÈÐôÆËñÂÊðÁÊíÁÈèºÂá²¼Ñ¦·Ç¯Á«Á¨Â«»¥µ¤©£~tixWq`~t`||ixïTËV«¯§«¬­®ú	{¶{§®«®«¬©«®°§®ª©¬¯«°ª®¬¯¬°­­¬±¬°®µ­²°³®²­µ°´°³° ³³·° ³°¤¸²¹±¡·³¤¸³£µ¶£º³¥¹¶§ºº£¸·¥»´¨¼¶§»·§¸¼«¿¼§½º§¼¸ª¾¼«½»«Á½©¼¾«¿½©½¾­ÃÁ®ÁÁ°ÆÁ³ÁÅ°ÆÁ°ÄÃ²ÃÅ³ÈÃ¯ÇÄ±ÆÁ±ÅÄ³ÇÁµÄÃ¯ÈÃ¯ÆÄ³ÄÂµÆÃ±ÄÂ³ÇÄ²ÈÄ¬ÇÁµÇÆ³ÆÄ³ÇÁ±ÅÆ´ÈÅ³ÈÇ³ÇÂµÅÈ´ÈÅ²ÊÄ·ÈÃ³ÆÈ³ÇÇ´ÇÃ²ÊÇ²ÇÃ³ÅÆ²ÅÆ±ÆÄ³ÆÆ³ÆÄ¯ÅÄµÄÂµÇÄ±ÆÂ²ÆÃ³ÆÄ±ÇÄ¯ÃÄ²ÅÁ²ÆÃ²ÃÃµÈÅ²ÃÄ¯ÆÃµÃÁ°ÆÃ³ÅÄ²ÈÂ°ÇÁ®Ä¾°ÄÃ±Ä¾¬Ã¿°Ã¾®ÁÃ¯Ã¾­Ã¿®Ã½¯ÂÀ°Ã»³À¾­Á¹®¿¾²Ã¾¬Á¼«¾¾®Á»¬Â¾ªÁ¾¬¿À§Ã¼«Á¼°Á½ªÁ½©À¾­Á»«¿»¯Á¸¬¾½°Á¾¬Á»«ÁÀ®¾À¬Á·¬¾½°Á¿©Á¼­Ã¾®¿»«Ãº¬À½®À¾©¿¾­¿½®Á¿«Á¾®Âº­½»®À¾®À»¬Ã½°¾º¬Ã»«¾¼­¾¾«¾»¬½»­Áº©À»¬¾»«¾»«¾»®¿º¬¿º«¾»©»¸¬¾¸­½·«¾º®½º©½»ª¾ºª¼¸«¾µ§»·§»¸§º·§½µ¦º¸¨»»§¾¶¨¸µ¥º¸©¼·§º·¨¹·©»·§º³¥»·¨»·©¹¼¬½¾¬¼½«½½¬Àº©¾¾¬À½°¾À¬¿½¬Á»¬¾»ª¾¼­½½¬ÀÁ­¾»¨¿¹«Á¿­Á¿¬Ã¼«À¿«¾¾ªÀ¾¯ÀÀ¬¿¾¬Â»¯Á¾«ÄÀ¬¿¼¬¿¾³ÃÁ¬Á¿±Ä¾¬Á¾®Å½¬ÃÁ±Ã¿¬ÄÀ®Ã¾®ÃÃ¬ÁÁ¬Á¿®ÃÂ¯ÅÁ°Ã¿¬ÁÁ°ÆÄ±Ã¿°Á¿¯ÆÀ¯Á¿®ÆÀ®ÃÂ³ÂÁ®ÆÃ³ÆÀ¬Ä¿¬ÅÂ¯ÃÄ²ÂÁ±ÁÁ¯ÃÅ¬Ç¾²ÃÄµÅÁ±ÃÁ±ÂÆ³ÈÄ²ÇÂ®ÈÅ´ÇÆ±ÇÅ±ÈÁ³ÆÅ³ÈÄ¯ÈÄ°ÅÂ°ÈÃ¶ÆÈ°ÈÆµÆÆ¯ÈÄ³ÈÇ´ÊÆ¶ÇÆµÈÅ³ÇÄ´ÊÂ´ÉÃ·ÈÊ´ÊÅµÌÆ³ÈÈ´ÇÇµÈÇµÌÆ³ÉÅºÉÇ´ÊÈ³ÌÇ¶ÈÅ·ÊÊ¶ÌÅ³ÌÆµÇÈ¸ÈÊ³ÊÊ·ÊÆ¶ÊÆ·ÊË¶ÊÊ¼ÌÊµÌÅ´ËÊ·ÌÊ¶ÍÅ·ÌÅ»ÌËµËÍµÍÊ¶ÊÇ¶ÎÊ¶ÌÈ·ÌÊ¶ÎÊ·ÏÌ¹ÌÊ·ÎË¹ÌÊ·ÌÈ·ÌÌ³ËÈ·ÉÊ¸ÎÉ¶ÍÊ¸ÎÊ¹ÊÊµÎÌ»ÎÌ¼ÏÊ»ÍÉ·ÌÌ»ÏÊ¹ÎÊ¶ÍÍ»ÍÌ»ÎË¹ÎÌ¹ÎÌ¹ÍÊ¹ÎÍºÏÊ·ÐÉ¹ÏÈ»ÎÐ¸ÎÍ»ÎËºÌÌ¼ÐÌºÑÌ»ÎÊºÎÌ»ÐÌ¶ÎÍºÏÈ»ÍÎ·ÎÎ¹ÏÍ¶ÓÈ³ÌË»ÎËºÑË¹ÏÍ»ÐÏ½ÑÏ¼ÎÌ»ÒÊºÑÐºÏÍºÑÐºÎÌ»ÒÎ»ÎÐ¼ÓÌ¹ÐÎ¼ÔÐ¾ÒÑ½ÐÌ»ÐÐ¾ÔÎ»ÏÒ»ÒÎ¾ÏÐ»ÒÎ»ÓÍ»ÐÐµÐË»ÒÎ¼ÒÌ½ÒÍ¾ÒÑ¼ÒÒ¼ÑÑ½ÔÐ½ÒÐ½ÓÏ¹ÓÒ¼ÒÐÁÒÎºÒÐ»ÓÐ¼ÕÏ¼ÓÐ¼ÑÎ¾ÒÖ½ÒÎ»ÒÓ¿ÓÒ¿×Ô¾ÓÐ¾ÔÓÀÔÓ¿ÓÐ½ÒÐ¿ÔÐ¾ÒÒ¾ÓÑÀÕÒ¾ÕÒ¾ÓÕÁÔÕ½ÒèÀÓ÷»Ï÷¶Òõ«ÎèÃØ¾ÛÂò©ÌúÃÞúÔéúßïúßóúæöúèúúêöúáïúÌãï¶ÒÎ ½»³º®¹²Ã±Ôª¸è¶Âò¼Æ÷½ÑúÅÒúÃÔúÅÖúËÛúÊÜúÐáúÑãúÛåúÝêúãïúèñúñôúö÷ú÷úúøúúúúúúúúúúú÷úúùúúöúúõúúòúúóúúèøúáóúÛïúÓìúÌéúÆáúÄßúÇàúÊãúÐäúÍéúÊãúÊáúÓäúÐäúÈäúÂßúËÜúÐÝúÉáùÈÙúÇØúËÚúÍÝúÐáúÊàòÆßúÈáúÍéúÒëúÏïúÚôúÛöúÞ÷úêúúïúúöúúùúúúúúòúúëøúåôúàïúàíúßëúÜæúÔáúÓàúÑÞúÐÞúÎÞúÎáúÑâúÙèúÝïúàóúäöúíúúíúúõúúòúúîúúìúúçúúâùúÜóúÖñúÐëúÍäúÃÝúºÖó°Ëç¬ÁÕ©¼Ó¬½à·ÀêÁÃôÃÉøÂÍúËÒúÕÙú×äúÕåúÕçúÕèúÒêúÕìúÌêúÎìúÒëúÒêúÅãÿñ»Îÿé»ÍÄÈ¬YáS¶²±Ã¬¼qÏl ð#ï"ÿsÙaÎÆ©Úvù¼Çâ³Âá¦ÁGß=&ë"º¥°ª¬§»®Ôµä¬ºöÂÉúÐÒúÒÙúÖÙúÒÚúÖÜúÓÜúÍÖúÐÓúÎÕùÌÑöÉÐñÁÇì¹Æß²¿Õª¹Ð¤·Ì§²Ç ±À°º©´§± ¦wf|gfÿïWÍU¬°­±® ¯9Þ9!í!© ª©®¯¡®®¯¬ ³°¯²¡¯®¯®°®³¯ ²° ´¯°±¢±µ¢±³ ³³£²´¡µ²¥¶´¡³³¡¹³¦·´¤·´¤µ³§¹·§µµ¨··¥¹º©µ¹¬º·¬»»§»º©¹»ª¾»¬»»«»»ª¾¼«¿¾¯¾½®À¾¬Á½¬Â¿°ÃÁ­Ä¿­ÂÀ°ÁÃ±Ä¾°ÀÃ³ÈÆ·ÆÃ·ÈÃ¶ÅÅµÆÆµÆÆ·ÆÅ³ÊÆ·ÉÊ·ÇÈ´ÎÉ¸ÌÇ¸ÈÉµÈÈ³ËÃ¶ÉÆ³ÈÈ¶ÊÇ¸ËÉ¹ÉÊµÎÌ»ÊÊ»ÍÎ¹ÎÇ·ÍÌ¼ÍÌºÊÌ¹ÊÌ¼ÏÊ¹ÌÍ¹ÎË»ÌÌ¹ÎÊºÌÌ»ÎÌºÌÈ¹ÊÉºÍÊºÌÊ·ÌÇ¹ÊÇ¹ÍÊ·ËÊ¹ÌÈ´ÉÊ¶ÌÊ¼ÊÊ¶ËÈ»ËÈ¶ÊÈºÊÉ·ÌÈ´ÈÇ¹ÊÈ¶ËÈ·ÇÈ¸ÈÆºÌÊ´ÉÆ·ÉÈµÈÉ·ÆÈ·ÇÆ³ÈÆ³ÈÆ¶ËÈ·ÈÆ³ÉÄ¸ÆÃ´ÆÊ³ÇÅ³ÃÃ³ÅÆ³ÇÄ¶ÄÅµÈÂ°ÅÅ¶ÆÃ³ÇÂ²ÃÁ³ÃÄµÇÅ°Ã¿±Æ¿±Ã¿³ÃÃ´ÅÁ±Ã¿°ÂÄ²ÃÂ³ÃÃ²ÆÃ¯ÆÁ³ÃÂµÆÅ³ÄÂ²ÃÂµÉÃ³ÂÃ°ÃÂ´ÃÃ±ÇÄ¯ÅÁ³ÁÃ®ÇÁ²ÄÃ²ÃÆ¯ÆÃ²ÃÄ´ÄÂ³ÇÁ³ÅÄ´ÇÃ¶ÅÂ²ÅÃ®ÃÁ³ÆÁ®ÄÂ³ÃÁ±ÈÃ³Á¿¯Á¾²ÃÂ³Á½±Â¿³Á¿°Ã¿²¿¾±ÂÂ¬¿Á­Á¾³ÂÁ³ÀÃ®Â½¯Ã¼®Ã½°Á¿¯Á¾«Â¾ªÀ½«½¼¬¾¿¬¿½¯¿»¬¾Á¬Á¾¯¿»ª¿½«¾¼®À»³¿¾­¾¬£±·§¸³§¸·¤¼´¥¹¸¤»µ£ºµª¸·¤»·¨¼µ¦¹º¢»·¬»·¦»º«½»ª»µ¦¼·©»¹¤¿·§»¹§¿¸¨»¹©»¹©¼¸¥Ã·©½¸§¾»©½¹¥»·¥¿»«¾»«¾¸¥Á»®¾¹¢¼»¬À»ª¾»¦¾¼©½½¦Á¹­¿¶ª½¹§½º©À·§»»©¾»¨Â¾¬¾»¬¾¸«À½§¾¼«Áºª¾º¬¾¸¬¿½ªÀ½¨Àº­Á¼«À»¬Âº«¾»®À»ªÁ¾ª¿½¬ÁÀ«Â»¬Á¾®Á½©Á¾­À¾«ÂÁ­Ã»¬Á¾­Á¾¯Â¿­ÄÃ®Á¾®ÄÀ®Ã¾°ÂÀ®Æ¾¬Å¼«ÁÀ°Ä¿­ÁÀ¬ÃÀ¯ÃÂ±ÂÂ±ÄÁ«Å¾°ÄÂ°ÅÁ´ÅÀ®ÄÀ®ÄÁ°ÇÂ¬Æ¿²ÄÀ±ÆÀ¯ÆÃ±ÇÁ°ÄÁ®ÆÂ¯ÆÃ²ÂÁ®ÆÃ³ÆÁ³ÆÃ±ÊÅ±ÈÄ²ÆÃ²ÊÁ³ÇÄ²ÅÅ°ÇÃ°ÉÂ³ÈÃ°ÈÃ³ÅÅ¯ÉÁµÆÄ±ÊÄ°ÈÃ´ÉÅ³ÆÃµÆÃ²ÊÆ´ÈÃ²ÇÃ·ÇÅ°ÈÂ²ÊÆ²ÆÃ´ÈÄ²ÆÄµÇÄ³ÈÆ³ËÄ²ÇÇ³ÉÅ³ÇÆ³ÈÈ·ÊÆ·ÉÇ·ÊÆ³ÉÆ´ÊÇ¸ÈÈµÌÆµÊÇµÆÁ²ÈÈ²ËÆ³ÊÇ´ÉÊ²ÉÅ¸ÌÊ³ÎÇ³ÌÈ²ÎÈ´ÌÆ´ÍÆ²ÌÇµÊÇµÎÇ³ÊÃ´ÈÇµÊÈ´ÉÆ´ÊÇ¶ÌÌ´ÌÇ´ÎÈµÌÊ¸ËË´ÊÆ´ËÆ³ÍÈ³ÎÇ¶ÌÊ¸ÎÆ±ÌÈ·ËÆµÎÌµÎÇ·ËÈ·ÏÌ¶ÊÊ·ËÊ¸ÎÉ¸ËÈ·ÎÉ¸ÎÈ·ÎÆ·ÎÌ·ÍÈ·ÏÈ·ËÊµÌÌ·ÎÌ·ÎÌ»ÎÊ¸ÎÎ·ÊÊ¹ÌË¸ÎÊ·ÏÊºÏÌµÒÈ·ÎÌºÎÊ»ÏÉ¶ÐÈ¸ÎÌ¹ÐÌ·ÊËµÌÈºÏË·ÍÊ»ÎË»ÐÐ»ÑËºÐÊ»ÑÊ¼ÐÎºÎÊ·ÏÌ»ÐÎ»ÏÍ¾ÐÔ»Ðì»Îú·Ðø°ÌñÆç¿ä¾äÃáÄõ±ÏúÁÛúÐæúÕéúÙðúãöúåôúâïúËãò»ÒÎÁ·°­¬±«Á°Ò§µæµÂï·Æñ»Êù½Êú½ÐúÆÒúÆ×úÊÜúÍÜúÐßúÖãúÚæúßíúãîúìðúð÷úõùú÷úúúúúúúúúúúúúúúúúùúú÷úúõúúîúúíúúê÷úäôúÜðúÒíúÑæúÊãúÌáúÊäúÒæúÓäúÕéúÖêúØêúÔéúÇäõÆàúÐßúÌãôÊáô¾Øõ¾ÜóÉÙ÷ÊÞúÔãúÐåúÈãúÇäúÉæúÌìúÔñúÖðúÙôúÞøúèúúìúúðúúñúúìúúäõúØðúÚîúÙêúÕæúØáúÕáúÑàúÍÜúÎÜúÌÛúÉÚúÌßúËàúÑäúÔêúÙîúÞïúçõúçúúìúúîúúîúúëúúæ÷úßôöØíúÒìúÍçúÆßúÁÛú²ÏðªÈà¢ÀÒ¢¹Ð¥·Ù¯ºå·¾ìºÆð¼È÷ÁÎúÇÐúÑÜúÓáúÒáúÐçúÓéúÎéúÑéúÓéúÖîúÎçúÁäö»Øÿú¾ÝêÁÒò¾Ðê¸Ìá±ÊÜªÄÝ®ÀÁ´©ÿÉº­ÿíµÈÀÃ£dßTÝ²¹â§ÁÁ§®MÛD®¬ÌµÀ®¯©³¬Æ­Ù¡·î³ÂúÆÌúÏÕúÒØúÕÛúÖÝúÕßúÕØúÏØúÐÕúÎÑöÇÏîÁÈé¸ÃÜ²¼Õ¦¹Î¦²Ê¡²Ë£¬¿¬»§²«£tr|bt`ÿ|iÿPÍPx®z¥«¬¬ ?Ù>¨¦ª¡©£§¦©¤«¤©¤¬§«¡ª©­§«¦®©®©®¦¬«®§¬«­¬°¬±¬²¬±«°«®¬°­²®°¯¡³®´± ¶±¤¶³´°¥¶³¥³°¸´¥µ³¨¹·¤¹¸£¹µ¦»¸©º¸¨»·«¾½©¾»©»¹©¼»ª¾¼®¿¾ª¾¿¬Ã¾®À¾ªÁÀ±Â¾­ÂÀ­ÃÁ±ÄÁ¯ÁÁ²ÃÁ²ÆÁ´ÆÃ°ÄÄ³ÃÃ²ÆÀ³ÄÁ±ÃÂµÈÄ´ÆÇ´ÆÅ´ÈÅ´ÇÃµÊÇ¶ÈÅµÇÆ´ÆÈ´ÊÇ´ÊÆµÇÇ·ÊÈ¹ËÇ·ÈÅ¸ÇÃ´ÊÅµÈÇ¶ÈÃ´ÈÆµÈÅ¸ÈÆ´ÊÆ³ÇÆ´ÅÇ²ÆÄ³ÆÃ³ÆÃ³ÆÃ²ÆÅ´ÆÂ²ÆÃ¯ÇÁ²ÄÃµÈÂ³ÃÁ°ÂÂ²ÇÁ°Ä¾·ÃÁ±ÃÄ²ÃÁ±ÅÀ°ÃÁ°ÅÂ³ÃÁ²ÄÂ³Å¾­Á¿­ÄÃ²Ä¾­Ã»­Æ¾¯ÃÀ­Â½²Ã¿®Å¾®Æ½®ÁÁ­Ã¾­Áº«À»°Ã¼¬¿¼®Ã¾«À½¬Â¾¬¾½¬¼¼¬ÃÁ­Á»®¾»®À¾®½»®À¾¬Á¾«Á¼¬Á½®ÁÀ®Ä»¬¿¾¯À¿¬Â¾¬¼¹«¾¼«½»¯Á½¬¾½­Áº­Á¿¬Â¼«¾½¯Á¼¯À¿¯Ã½¬¿»©Á¾¬¿»«À¼¬Á»¬Á»«¾»©À¾­¾¹©¾º«¾¸«¾¹¨½¸¨¾·«½¼«¼·¬½¹¬¾¼¨¾¹©»º¬½»©½·«¿¸©¾¹©½»©¼¹¨¾¸§½¸©»µ§¹µ¨¾·§º·¥¹¶§½µ¨»µ¨¸º¦»µ¥¸¶¬¹·©¹²¨¶¼¬¿Á°¾¼ªÂ»¬Á¾©¿½¨Á½­À»¨½¾«¾º©¾»§À½¬»»­¾¾®¿À¬Â¼¬Á¾¬ÃÀ¬¾¼¬¾¼­ÁÀ­Á¿¨¿¼¬¿¿©ÆÀ«¾½²Á¾¨ÁÀ©À½­Â¼­Â¾®Ä¾¬À¿¬ÃÀ¬Ã¾¬Â¾®ÂÁ®ÁÁ®ÅÀ¯ÃÀ®Á¾±ÂÁ¬Á¾°Å½«ÂÁ±ÁÂ°ÇÁ­¿Á°ÂÁ®ÃÀ²ÃÄ°ÃÁ¬ÃÁ¬ÂÁ²ÃÁ±ÃÁ­ÄÃ²ÆÃ²Æ¾±ÅÂ°ÆÀ¯ÄÁ²ÆÁ³ÃÂ­ÆÃ±ÆÀ²ÅÃ³ÇÂ³ÇÂ´ÅÂ°ÇÆ±ÃÁ°ÄÆ´ÈÃ³ÈÂ³ÈÄ°ÆÃ±ÈÈ²ÊÂµÇÄ´ÇÈ´ÈÅ±ÊÈ´ÇÅ³ÆÉ³ÆÇ·ÆÃ³ÈÆ²ÈÇ³ÉÇ·ÈÇ³ÆÆ³ÇÈ³ÇÆ³ÊÆ¶ÊÇ´ÉÆ´ÆÇ´ÌÆ³ÊÅ·ÌÈ¶ÊÇ¸ÍÆ´ÊÆ¶ÊÈµÌÊ³ÈÉ·ÉÇµËÈ¶ÌËºÌÈ¶ÊÃ·ÊÈ¹ÌÈ¶ÊÈ³ÈÈ·ÉÇ³ÊË¹ËÉºÊÉ·ÈÈµÌÈ´ÌÊµÌÈ¶ÊÌ¶ËÆ¹ÌÊ¸ÌË·ËË·ÈÊ·ËÈ¶ÌÊ¶ÌÊµËÌ·ÎÉ¶ËÌ·ÌËµÌÊ»ÐÍ·ÍÎ·ÏÊ·ÊÎ»ÍÊ¶ÍÍ»ÌË»ÏÍ»ÎË¹ÍËµÎÎ¹ÍÌ»ÏÌ»ÐÊ·ÌÎ¹ÎÌºÏÍ»ÍÎ·ÐÍ·ÎÍ·ÍÊ·ÐÈ¹ÎÍ¹ÐÎ¸ÎÊ¹ÎÌ¹ÑÊ·ÎÐ»ÐÎ¹ÐÌ·ÎÊ»ÐÎ¹ÎÐ¸ÒË¹ÑÐ¶ÎÐºÐÊ¶ÌÌ¹ÎÌ¹ÒÍ»ÓÏ¸ÑÎ»ÎÍºÐÏºÍÎ¹ÏÐ·ÑÏ»ÏÐ¾ÒÐ»ÐÌ»ÐÐ¹ÓÍ½ÐÏ»ÒÍ¾ÒÍ»ÏÏ»ÑÌºÒÎ»ÒÒºÓÐ½ÐÍ»ÓÏ»ÓÎ¼ÒÒ¼ÖÍ»ÎÎ¼ÕÑºÒÒ»ÎÐ¿ÒÐ»ÏÒ½ÐÐ¿ÕÎ¼ÑÓ¹ÒÍ¼ÓÐ¾ÓÐ»ÔÐ¾ÑÒ¾ÕÓ½ÔÏ¼ÖÑ½ÕÒ¼ÔÓÁÕÑ½ÓÐ¾ÔÑ»ÓÒÁÒÒ¾ÕÐ½ÓÕ¼ÓÙÀÓö¿ÓúÂÓúºÖúªÒú¢Ðú§Óú§Ñ÷®Ðú±Õú»ÙúÈâúÖéúÛòúãòúéôúäôúÖëúÈÛá¬ÇÀº·³¾µÇ¦¶Ü¯Áë¹Åö»ÊöÁÐúÀÑúÂÖúÈØúËÝúÎàúÐâúØçúÜéúàíúäòúëðúñøúõúúùúúúúúúúúúúúúúúúúúúúúúúúúúúúúú÷úúöúúïúúëøúè÷úãôúÝðúÖíúÕìúÖìúØêúÛïúãóúäóúãòúàñúÖïúÔéúâïúàïúÕìúÈäúÍçúÓçúÑíúØêúÛðúÓïúÐîúÒïúÒñúÜôúà÷úäúúåúúëúúîúúíúúëúúâúúÚôúÙïúÙïúÖêúÙèúÛèúÚæúÕàúÖâúÒàúËßúÌÞúÐâúÐãúÕèúÙîúÛðúâôúëöúìùúñúúöúúôúúðúúïúºî¹dõc¸å±úÒîúÏéøÅàÄÈ§zÙdÔ´´Ü¨½Öª½á¶»é¹Âð¿ÆñÀÉöÀÐúÆÕúÎÝúÔâúÔéúÖíúÖëú×ïúØðúÚòúØðúÓïúÌëúÊæúÐèúÈéúÌàúÍâúÊÝð·Óé¹Îó¹Ðã¯Éã³Ëÿô³Îì·Îè¬Ëì¹Ìö½Ôó±Îê«ÈÔ¨¿Ù¤ÀÜÁÐ·Ê´Ä³Î·Ü ½ï³ÆúÃÔúÐØúÞàúßãúäæúßãúÝâú×áúØßúÔÚúÐ×øÆÒðÂËæ¶ÄÜ¯¼Õ¬¹Ó¨¹Ò¥µÅ¤®Ã©»¤µ¤²~kxg~iÿ £ª§¶¯¿´Ê¢¶É£±¿£²¶²¬³ª¬©®«ª¨¬¬¬¬­¦­©¬®®¬®¬«¬±¯°­¡²²³¬°±³±¶¯±°¡µ¯¢·²¡´²µ´¡³³§¶³¥¸³¡¹¶¡¹·¤º¸§··£»µ¦º·¤º¸¦½¸¤»µ¥º»¨»»®º»¬¾¼¬À¼¬¾º¬½Á®Á¼¬¼Á°ÁÁ±ÃÀ®Á¿¬ÅÄ³ÄÁ¯ÄÁ±ÆÂ³ÅÆ³ÇÆ´ÆÈ·ÆÅµÈÈ´ÅÈ·ÊÈ³ÊÆ³ÇÈ·ÈÇµÈÈµÆË¶ÉÍ»ÐÈ»ËÌ·ÊËºËÍ·ÍÊ¸ÍÌ·ÍÊ¼ÍÍ¹ËÌ¹ÐÍ¶ÊÊ·ÌË»ÍË¹ËÈ¸ÇÌºÊÌ¶ÎË¹ÌÊ¹ÌË·ÊÊ·ËÊ¹ÎÉ»ÏÌ¸ÍÍ»ÌÌºËÊ·ÉÈ´ÌËºÍÈµÊÈ¼ÉÊµÈÈ¶ÊËºËÈ¶ËÊ´ÊÇ»ÊÇ·ÌÊ¸ËÆ·ÊÇµÊÊ´ÈÅ·ÆÆ·ÈÉµÈÆ³ÈÆºÊÈ³ÈÆ³ÈÆµÈÆµÉÄ³ÅÅµÉÄ²ÈÉ²ÈÃ´ÄÃ¶ÈÆ°ÈÅ±ÆÂ²ÈÃ±ÃÀ°ÆÁ³ÈÄ²ÄÃ³ÆÃ³ÃÁ±ÅÀ²ÁÂ²ÃÃ®ÅÁ°ÃÁ³ÃÅ³ÇÆ³ÄÂ³ÃÂ³ÅÂ²ÄÃ³ÅÅ³È¿°ÂÆ´ÃÃ²ÆÄ°ÆÂ³ÆÀ±ÆÂ²ÆÃ³ÃÄ²ÃÂ³ÃÃ³ÂÃ±ÅÃ°ÄÃ³ÅÅ°ÄÂ³ÃÁ°ÂÀ±ÃÃ®ÄÃ²ÃÀ°ÄÂ±ÂÁ²ÄÀ°ÃÁ°Á¿±Å½¯ÃÃ®Ã¿­¿½¯¿¿©¿¾«¿»®Á½°ÁÁ±Â¿¬Â¿´ÁÂ®ÃÁ®Â»¯Â¿¬Ã¼­¿»­¿»¬¾»°¼¿¨ÂÁ¬¿º¬¾»¬¼¾®¾¼¬Á¼ªÀ½¨À¾¬¾»°¾»¬Á®¡³·¥»µ¥º·§º´¤»³§»µ£¸·¦º¸©»·¦¸¹£½µ¨½¹¦º¹£»·§ºº¨¼¹¨½¸©»¸ª¼¸ª¸µ§º·¦¼¸§»·¤¼¹©¾¼¨¾·¨½»¬»¸§¾¸©¾º«½¸ª¾·©»»ªÀ¹«¾»©½·¦»»¨Á¸§¾·«À»«½ºª¾»¨»¼­Àºª¾º§¾»®¾º«Áº¬¾º©¾»©¾½°Ã»¬½¼©À»©½¸¬Á»«¿»«Á»¯¿½¬Ä¹¬Á½¬À¾ª¾»¬¿»®Á¼«Ã¾¬Á»«¾¾­Ã¿­Á¾­Ã½­Ä»¯Â¾¬Á¾¬Ã¿¬Ã¾®Ã¾°Æ¿­Ä¾¬¿À³ÄÁ±Ä¿¬ÅÀ¯Ä¾ªÃÁ°Ä¾¯ÃÁ¯Á¾¬Ã¾±ÆÀ¬ÇÁµÆÁ¯ÄÀ°ÆÀ®ÂÁ±ÇÄ³ÃÀ¯ÆÁ°ÆÀ²ÄÃ®ÄÃ³Æ¿°ÅÁ®ÄÀ²ÆÀ°ÇÄ¯ÆÁ±ÆÁ³ÃÄ¯ÄÂ²ÆÆ³ÉÃ³ÊÄ°ÆÁ°ÅÂ±ÈÃ²ÈÄ°ÈÁ³ÆÃ²ÈÁ³ÆÅ®ÇÀ¬ÇÃ±ÈÃµÊÄ®ÈÆµÊÅ²ÇÄ³ÇÄ°ÈÁ³ÇÄ°ÇÃ³ÉÄ´ÉÆ³ÉÄ³ÊÃ¶ÇÇ³ÊÆ±ÈÄ³ÊÆ³ÊÅµËÃ³ÉÉµÊÆ³ÊÆ·ÉÇµÇÈ³ÍÆµÌÅ³ÊÄ³ÉÇµÈÇ¸ËÇ´ÌÅ´ÌÊ´ÉÇ³ÌÆ³ÈÈ·ËÆ·ÍÈ³ÇÃµÆÇ°ÉÇ¸ÍÈ²ÉÈ´ÍÈ¶ËÈ¹ÈÆ·ÎÉµÐÈµÈÈ´ÍÊ²ÌÅµÍÊ·ÎÆ·ËÇµËÈ´ÌÉ³ÌÇ¶ËÉ·ÎÊ³ÌÊµËÈ³ÊÌ·ÐÌ¶ÌÆ¸ÍË¸ÌÊ¹ÎÇ¶ÌÊ»ÌÌ¹ÎÊ·ËÊµÐÈ¶ÏÈ¸ÌÈ·ÐÊ·ÌÉ¸ËÌ·ÍÊ¸ÎË¸ÎËºÐÎºÎË¹ÌÈ¶ÍÊµÍÏ¸ÎÊ»ÏËµÏË¹ÐÊºÎÈºÎÊ¸ÎÌ»ÎÌ»ÐÈ·ÌÌ·ÏÊ»ÏÌ»ÐÌ¸ÌË¶ÑË·ÎÌºÑÊ¹ÎÌ¸ÏÌ¹ÏÎºÒÌ¼ÒÈºÒÒ»Ðõ¾ÓúÃÕú»Ôú®Óú¬Õú³Õú³Öú»ÖúÆÛúÀÝú»ÜúÇßúÖêúÝëúáïúÝîúÜåúËÚÚ­ÇÄ¹¶²»®Ç¡³Ü­»èµÁñ¸Íó¹Ìù¿ÍúÁÓúÆÖúÇØúÌÛúÎÝúÖâúÙäúßéúáïúçñúíóúðùúôúúùúúúúúúúúúúúúúúúúúúúúúúúúúúúúúöúúòúúïúúèöúæôúâóúÜòúØîúÖêúÔèúÙéúÛêúáïúãðúâðúÕìú×êúæñúßóúÖëúÎëúÚìúâïúØðúÛîúâñúÝòúÖîúÒòúÛôúà÷úàöúàøúãùúâúúàúúÛøúÕôúÒðúÎéúÐêúÕçúÕçúÔäúØßúÔãúÖáúÐßúÌÝúÊÛúÆÚúËÞúÊáúÐãúÔçúÜîúâïúèõúëöúïùúòúúñúúïúô-ù+C÷A+ù*æøÌâÞ{%õ 4í+&ð °·Õ¤µÖ°¸áµ¼íºÃì¸ÁïºÉ÷¹ÓúÀÓúÈÛúÐáúÓêúÕéúÕíúÚîú×îúÑïúÕîúÓêúÌëúÓèúÖèúÎèúÎçúÉàú»ÙóÁÓö¾ÔíºÓï¶Ìõ¼ÎúÃÖ÷´Ôç´Òê³Ìó¼Ë÷¾Ïð·Ìç§ÈÙ¾Ù»Ö»Û·ÕºÓ½Ý¤Áí®Æ÷¾ÐúÍ×úÚÛúßãúãåúâåúÞãúÜáúÖÜú×ØúÎÖöÆÎïÂÈæ·Äß­¾Ø¬¸Ó¡³Ë¢®Ç«¾©¸¤«¨u|i{`ubw©¤¸¦ÉªÛ¦¯ß¨µÝ§¹Ö¡²Ã®²°©¬¤§¡§¢£¡£§¢ª¡¤££¤¨¢§£§¥©¤ªª¬§¬¤¥¨®©®¬±¬®©­¬®©®­³®¯¯¯¯³°¡²¬µ¯±°³¯³¯¡³±¡µ± µ³´µ·µ¥¸²¦·¶£»¶§¸¸¦»¶§º¶§»¹©¼½¬¿¹©»½©»»«¿½¬¾¾¬Á¾­¾¾®Á¿¯Ä¿°ÃÁ«Ã½²ÃÃ±ÄÁ¯Å½±ÄÃ³ÃÃ³ÆÂµÅÄ³ÇÆ³ÇÇ³ÈÄµÈÆ³ÈÇ³ÉÈ·ÈÅ¶ÇÆ¶ÊÈµÉÈµÉÈ³ÈÆ·ÊÆ³ÌÆ´ÆÃ·ÄÃ´ÈÆ±ÇÄ³ÈÈµÇÆ³ÆÆµÊÆ¸ÈÄ³ÇÇ´ÇÄ³ÃÄ³ÅÁ²ÇÅ³ÇÄ²ÈÄ²ÄÃ±ÆÁ²ÄÄ°ÅÁµÆÄµÆÂ±ÅÁ³ÆÃ´ÇÃ®ÄÂ³Æ¿±ÃÃ²Æ¾®ÃÂ²ÇÁ¯ÄÃ±ÅÁ°Ä¾®Ä¾±ÂÀ°Æ¾®Ä¾°ÃÀ°Å¼²Â¾®Ã¾¬Á¿­¿½°Ã¾²Å¾­Á»¬Á¾°Â¿°Ã½¬Á¿®¿¾©Â¾¬Á»«¿»­Á½¬¾¾®¿¹¬¿¾ªÃ»³Â½¬Á¼­ÁÀ«Á¾­À»¯Á½¬Á¾²¾¾¬Ã»¬À»°Â»­À»¬À»­½½¯Á»«À¼¬Á¾ªÀ»¬À¼¬Á½­Á½¬Àº¬Á»¬½¼©¾¸«¿»­½¾ªÁ½¬Á»¯À»¬¼¹¬½º¬½¸§ºº¨¾»¬¼º«»¸©¿¹ª½·ª¾»¨¾»¬½»©Àº§½¸«»·©¾·§»¶§»ºª»¸©¸·ª»·ª¸·¦½³§¹´©½·¤»·¤¼³¬º¹©½µ¥ºµª»³¦¹»ª¿º©À¼¬¼»¬¾½ªÁ¾«½»«¿¼©Á½¬¾¹¬Á»«¿½®Ã»©¿¾¯Â¾«Á¾¬ÁÀ¬Â¾¬¾¼¬À»¬¿¾ªÀ¾¬Á¼ª¾½¬ÁÂ®Ã¾­¾Á«Â¾¨Ã¾¬ÀÀ°Ã¿ª¾¾®ÀÁ¬Ã¿®Å¿¬Â¾¯¿¾±ÃÁ¬ÀÀ³Å½©ÃÂ¬ÂÁ­Ã¿¬ÆÁ°Å¾­Ã¿®ÆÃ¬Á½¯ÂÀ¬ÅÂ®ÁÁ³ÃÃ­Ã¾®ÃÃ³Å½­ÃÁ­ÂÂ±ÄÁ°ÅÃ®Å¿°ÃÁ±ÅÅ­ÅÃ°ÈÂ³ÆÅ²ÈÃ±ÆÃ±ÃÄ°ÆÁ®ÆÃ³ÃÅ®ÇÁ²ÅÁ°ÄÅ²ÆÃ²ÅÅ²ÇÂ³ÆÆ³ÉÂ±ÆÅ³ÈÇ±ÉÃ³ÈÃ°ÅÁ±ÊÅ·ÇÃ´ÆÆ°ÇÃµÇÆ³ÆÆ´ÊÃµÆÅ±ÆÄ´ÈÆ³ÉÆ¶ÈÈµÈÄ´ÉÄ·ÈÇ³ÈÆ²ÊÈ³ÉÇ³ÊÆ¶ÌÆ´ÈÊ´ÈÆµÊÇ³ÊÈ¶ÊÊµÊÉ·ÍÊµÌÈµÍÈµËÊ´ËÈ¶ÊÆ·ÌÈµËÌ´ËÉ¸ÊÆ¶ÌÌ¹ÌÉ·ÎÆµÌÇ·ÌÊ³ÎÊ¹ÏÉ·ÈÈµÌÌ¶ÍÌ¹ÍË·ÎÈ¸ÈÌµÏË¸ÎÅ¶ÌÈµÌÉ´ÍÍ·ÍÊ¹ÎÊ·ÎÍ·ËÊ¸ÎÈ¶ÎÉ¹ÐÌ»ÌÏ¸ÎÎºÐË»ÎÎ»ÐÍ¹ÎÊ·ÍÊºÐÌ½ÒÉ»ÎÎ»ÌÌ·ÑÊ·ÎÌ¸ÎË·ÐÌ·ÐÉ¸ÐË¸ËÎºÐË·ÎÎ¶ÒÎ¹ÒÌºÍÊ¸ÓË¸ÏÎºÎÌ¶ÏÍ·ÏÌ»ÏÍ»ÒÌ¼ÐÌ¸ÏÐºÎÎ·ÐÌ¼ÍÏ¾ÐÎ»ÕÒ¼ÑÌ»ÒÏºÓÑ¿ÓÌ¼ÒÍ¹ÒÏºÓÎ¾ÓÐºÓÑ·ÎÐ»ÐÎ¾ÔÐ»ÏÎ½ÎÐ½ÔÒ¼ÐÐ¿ÏÐ»ÔÐ¼ÒÐ»ÓÐ¾ÕÐ¼ÒÐ»ÏÒ¾ÒÓ¹ÒÐ¶ÒÐ½ÐÐ»ÕÐ½ÒÐ¹ÒÒºÕÒ¼ÒÓÁÓÒºÕÏ¼ÓÒ»ÎÑ¾ÔÐ¼ÒÐ¾ÒÒ»ØÑ»ÒÎ¾ÖÒ¾ÕÒ¾ÕÒ¿ÕÓ¾ÔÒ»ÕÒÁÓÜ¾×úÃÖúÊßúÆàú¹Üú»àú¾ßúÃàúÌâú×èúÖëúÎíúÇçúÐéúÚëúåòúäïúáèúÎâê¶ÐËÀÅ·Æ ¸Òª»è³ÃïºÉõ½Îø¿ÐúÁÒúÅÙúËÙúÏÝúÌâúÓàúÜèúÝìúæïúêôúìõúñøúôúúùúúúúúúúúúúúúúúúúúúúúúúúúúúúúúúúúúúúúúúõúúóúúðúúìùúçöúãôúáñúÚðúÚïúßñúãöúäõúåôúÛóúàóúæôúãöúÞôúÝóúàòúèöúç÷úèúúêúúêúúäúúäùúáúúäúúèúúèúúãúúàúúÜöúÚóúÓòúÓòú×ðúØïúÜìúÛêúÜèúÝêúÜèúÙçúÕäúÏåúÊßúÌÞúÎáúÐçúÖëúÙíúâîúëôúïùúñúúóúúôúúòúÖóÖQùQ¼í»ðâì¥é¡*ù(æ{(ö#¸Îì»ÄhÝV(ð"À²¤à³¾ç·¿ï»Èò»Èó¼Î÷¾ÓúÁÓúÅÖúÏäúÖëúÞïúÞòúÝõúáõúÞôúÚñúÝñúÝóúàóúÝõúÝòúÛðúÓçúÌäúÈàúÌâúËáúÆßúÌÞúÒâúÉßú¾Öõ¼Ö÷ÃÓúÃÐ÷½Ðï³Íæ¦Æá§Âä²Âð»Éó¸Îí°Êï±Êô¿ÍúÈØúÕáúßãúçêúëïúèëúèíúåëúâäúÜáúÕÜúÏÖøÆÏïÁÍè´Äâ±¿Ù¬¾Ô§·Ì¤³Ç®½¬´¤®¡£tkl~­Á¢Õ®å©ºë¯¼ï°Àð®Áæ¬»Ð¡¶Ã°¹ ¯­¬¨«¤«¦§¤«¦¬¢©§¬¦«¦¬¥¬¬¬©¬ª®ª¯¨­®±­­¯°­±³¡³±®®±± ³°¤³±¢¶³ ·µ£µ°£¸³£·´¤·µ¤·´¨·´¡··§´·¥¼·£¹¹ª¼º¨¼½«½¹©»·«¾º¨½½®À½¬¿¾¬¿½¬¿Á¯ÃÃ®Â¿¯ÁÁ²ÁÃ®ÃÅ¯ÁÃ´ÃÃ³ÈÈ²ÆÃµÇÇ°ÊÄ´ÇÆ·ÈÊ³ÊÈ³ÊÆ·ÈÉ·ÌËºÈÆ¶ËÈ¹ÌÌ¶ÌÉ·ËÍ»ÎË¸ÌÌºÊÌ¼ÎÊºÎÊµÊË·ËÉ·ÊÌ¹ËÈ·ÈÌºÌÌ·ÊÈ¶ÉÌ·ÎÊ¹ÍÇ¹ÊÉ»ÍÍ¶ÎÌ¹ÈÊ¸ÌÉ³ÌÆµËÉ·ËË´ÈÈ·ÇÈ·ÊÉ·ËÇ·ÊÇ»ÊÈ¹ÊÈ¶ÉÆ·ÆÉ¶ÎÇ³ÈÈ·ÈÆ·ÊÄµÈÇ´ÉÈºÌÇ³ËÅ³ÊÆ³ÆÆ³ÉÆ·ÈÆ´ÉÄ¯ÆÄ´ÈÈ´ÆÇ±ÅÄ°ÆÃ¶ÈÆ³ÇÄ°ÄÁ²ÆÅ±ÆÃ³ÇÃ²ÆÃ³ÆÂ´ÄÂ°ÄÂ³ÇÃ±ÄÁ´ÅÅ³ÄÁ±ÄÃ³ÆÂ¯ÇÃ¯ÄÀ±ÁÃ±ÂÅ¯ÅÃ³ÅÃµÅÂ°ÅÁ³ÅÃ°ÁÃ³ÅÂ±ÃÆ²ÃÃ³ÊÂ¯ÃÁ°ÁÂ³ÆÃ³ÅÅ³ÅÁ¯ÆÁ³ÂÃ³ÄÃ±ÂÃ°À¼³ÃÁ²ÁÂ­ÂÃ®ÂÁ³ÃÀ±Ã½³ÃÂ±ÃÁ±Ã¿°À¿°Á»¬¿À®Á½¯¿¾®À¼¬¾¿®¿ÀªÁ¼¬¿½±¿À±Å¿®Áº¬¿¼­À½¬Á¾¬Á¾«À½¬Á»©À»«Ã¾¬¿»¬½½¬Á½®À»¬¾»®½¼¬Á¿¬¾¸¬¿®£´³¦»´¥¹·§½º¡»·¥»·¤»µ¤»µ§¹´¢¼¸£½·¦»·ª¸¸¨»·ª½·ª½¶§»·§¸·¨»·§»º§¾¸§»µª¼¸¦»º¨½¸¥½¹«¼¸©¾¹¤¾µ¨½¸§¼¼ª¼»¥½»«º¹ª½º¦Â¸§¾·§¾¹¥½»©½¸©¾¼¥Á¹©¼·ª½½¨½·§¾¹«¾½©¿¹¨½»¨¿º®Â¸©¼º¨¾º¨ÀºªÀ¼¯Á¾ª¾½«Âº¬»¾­Ä½¬¿»¨À¾¬¿½¬À¿®Á¾¬Á¾®Ã¾«À»­À»ªÂ¾¯À¿¬Á¾®ÆÀªÄº­ÃÁ®ÃÁ¬Ã¾®¿À®Â¾®ÃÀ¬¿¾®Ä¾­ÅÁ¯Ã¾µÅÀ¬Ã¼±Á¾­ÆÄ°ÃÁ³ÄÁ°Å¾¯ÆÁ°ÈÁ±ÂÁ®ÆÃ°ÄÁ°ÅÃ±ÅÀ®ÁÁ°ÃÁ±ÇÄ¬Â½®ÅÁ°ÇÁ¯ÅÃ´ÄÃ³ÇÄ°ÆÃ³ÄÃ±ÆÂ¬ÇÄ³ÅÃ³ÈÂ®ÇÃ²ÆÃ°ÈÄ³ÇÁ²ÈÃ³ÄÁ³ÇÃ³ÈÀµÈÆ°ÇÃ²ÆÃµÊÁ°ÊÁ²ÇÁ³ÆÃ³ÊÇµÉÂ³ÊÂ´ÈÅ³ÈÄ°ÃÆµÈÅ²ÌÆ³ÇÃ³ÇÆ´ÉÄ³ÈÂ³ÇÇ³ÌÆ³ÉÆ³ÈÄ¯ÊÆ²ÇÄ³ÈÄ³ÈÇ´ÈÈ´ÈÆ³ËÆ²ÊÉ¹ÌÈ±ÊÆ·ËÆ³ÈÉ¶ËÈ´ÌÈ³ÈÊµËÆµÌÄ³ÉÅ³ÈÅ¶ÎÄ²ÉÆµÈÅ³ÊÆµËÄ´ÍÃ²ÊÇ´ÊÈ¶ÌÉ³ÈÆµÎËµÐÈ·ÊÈ³ÌÆµÊÊµËÉ¶ÌÈ´ÊÊ³ÉÆ·ÎÈ·ÌÈ·ËÈµÐÈ·ÎÇºÐÇ¶ÊÈ·ÎÇºÎÊ·ËÊ»ÎÉ·ÏÊ¹ÐÈ»ÏÌºÏÎºÐÌ·ÏÌ·ÎËµÏÌ»ÐÍ¹ÎÌ·ÌÌ¶ÏÈºÍÊ·ÏËµÐÉ¸ÌË·ÏÈ¶ÎÌ´ÊÉ¸ÎÊ·ÏÈ³ÌÌºÏË·ÎÊµËÊºÏÊ¸ÏÊ»ÐÊ»ÏÍºÏÌ·ÏÎ¾ÐÎ¾ÑÌ¹ÎÌ½ÑÌ»ÌÐºÑ×¼ÒõÁÖúÈÚúÄßú»Ýú¾áú¾áúÀàúÊâúÔæúÜêúÔìúÌêúÈçúÎæúÙêúÝèúØèúÐØëµÍË¥¾Â¶Ç´Ú­»æ´Áé·Æò¹É÷¾ÐöÁÐúÂÔúÇ×úÊØúËÜúÑàúÖäúÝéúßëúçñúéôúîöúñúú÷úúùúúùúúúúúúúúúúúúúúúúúúúúúúúúúúùúúùúúöúúôúúïúúïúúé÷úâõúãôúÝóúÜòúÚñúàðúâóúáõúÜòúÛñúàòúâóúàöúá÷úê÷úðúúñúúîúúíúúíúúæúúãúúäøúåúúèúúàúúÜ÷úÖöúÒóúÖòúÒñúÕëúÕëúÙêúÙèúÝæúÖåúÜäúÙåúÕáúÐßúÊÞúÇÝúÈÝúÊÝúÌäúÐåúÖçúàìúçòúïöúðøúíúúðúúîúøæøÚæ×îäéúàògîb?ó=â1ó+ÔÉµùµÏnØ[ø
[truncated: 569,193 more chars]
